# Supplementary material for: Continuous sensing of nutrients and growth factors by the mTORC1-TFEB axis
Source: eLife. 2023 Sep 12;12:e74903. doi: 10.7554/eLife.74903 (PMC10547473; doi:10.7554/eLife.74903)
Supplement: Figure 1—source data 1. [file elife-74903-fig1-data1.xls]

## Sheet: TFEB_TR AA then Ins
TFEB_TR; cells treated with AA then Ins, at time points 4, 14; sampling time: 6 min; data are cells-by-time
2nd Tx dose: media
0.793097	0.777486	0.787922	0.785603	0.772907	0.764364	0.759475	0.821759	0.798531	0.784739	0.793674	0.823353	0.902491	0.937649	0.946567	0.958758	0.962007	0.930804	0.936425	0.951338	0.957367	0.982916	1.01778	1.02368	0.995686	1.01611	1.01226	1.00846	1.05846	1.08432	1.07992	1.09631	1.0859	1.09194	1.06875	1.06575	1.08403	1.0863	1.1032	1.10018	1.0857	1.06338	1.07588	1.05501	1.04647	1.08263	1.07788	1.11742	1.09259	1.09555
0.925379	1.01564	0.992228	0.990104	1.03499	1.0067	1.12541	1.12015	1.12998	1.13688	1.09368	1.11253	1.11939	1.09446	1.10578	1.11827	1.13957	1.11994	1.14522	1.16666	1.19617	1.17886	1.20573	1.20799	1.21623	1.26024	1.25814	1.2352	1.21993	1.21764	1.23688	1.23927	1.22099	1.20323	1.18149	1.20384	1.1995	1.18841	1.27145	1.21498	1.2516	1.26351	1.24161	1.2377	1.24234	1.25001	1.23896	1.23414	1.21865	1.23075
1.79259	1.79072	1.73299	1.72211	1.63871	1.57672	1.54418	1.70275	1.53374	1.51801	1.62375	1.45656	1.51028	1.56812	1.43217	1.53808	1.65667	1.61842	1.63818	1.57917	1.58804	1.55709	1.55032	1.52928	1.54571	1.60574	1.51508	1.52278	1.50834	1.52851	1.61776	1.68025	1.9156	1.92238	1.74603	1.90517	2.04834	2.05628	2.02265	1.92063	1.94891	2.17798	2.05656	2.11645	2.20029	2.23243	2.12374	2.17489	2.98625	3.20587
1.01716	1.06059	1.04621	1.0132	0.99106	0.978466	0.953004	0.925965	0.952782	0.972798	1.01162	1.02181	0.954854	0.897903	0.906152	0.898744	0.877618	0.861828	0.87168	0.887221	0.903326	0.956346	0.971029	1.01922	1.01277	1.0396	1.06498	1.09163	1.10345	1.1357	1.10863	1.09215	1.10197	1.13614	1.14896	1.12572	1.10336	1.08132	1.04361	1.03154	1.01974	1.08059	1.10303	1.14032	1.14237	1.17984	1.19361	1.1881	1.2097	1.15943
1.43552	1.47466	1.46603	1.48629	1.47744	1.44031	1.405	1.36803	1.43217	1.44022	1.4435	1.44679	1.42949	1.38531	1.35972	1.38854	1.41589	1.38778	1.3762	1.36481	1.37115	1.36429	1.35749	1.32694	1.29417	1.31185	1.29426	1.29715	1.39334	1.28923	1.31395	1.3039	1.26299	1.22457	1.20567	1.14782	1.0911	1.02133	1.01775	0.990234	0.986608	1.00832	0.943947	0.973124	1.01655	0.957539	1.0496	1.01007	0.982064	1.07271
0.959212	0.822825	0.720395	0.774557	0.837525	0.911636	0.825027	0.861377	0.879518	0.908242	0.945875	0.99235	1.00853	1.02525	0.942346	1.01376	1.09689	1.07848	1.39837	1.4134	1.419	1.57083	1.75688	1.71109	1.68396	1.76039	1.80332	1.84931	1.67066	1.88343	1.68245	1.52024	1.39961	1.36244	1.31174	1.25514	1.25383	1.23177	1.24967	1.32301	1.33565	1.37575	1.43523	1.62026	1.58009	1.62827	1.21883	1.15752	1.06109	1.25885
0.865936	0.878924	0.849605	0.824154	0.958058	1.00313	1.04467	1.12982	1.15984	1.21991	1.24161	1.22451	1.17568	1.22978	1.25876	1.20037	1.17405	1.12489	1.06487	1.19953	1.13577	1.07097	1.01484	0.970352	0.882629	0.859246	0.824985	0.791818	0.773723	0.793494	0.828466	0.905913	0.974913	0.979026	0.96205	0.938163	0.925781	0.931322	0.913013	0.932148	1.0071	1.0506	1.04042	1.01663	1.04084	1.03007	1.09168	0.997067	0.999356	0.973906
1.23579	1.26921	1.26875	1.34144	1.36631	1.34295	1.32097	1.27314	1.20424	1.15779	1.15118	1.09416	1.01561	0.95113	0.966052	0.952416	0.967784	0.946408	0.925956	0.90572	0.886349	0.851933	0.814805	0.780778	0.73876	0.726746	0.715575	0.707037	0.73392	0.762928	0.829939	0.836221	0.865483	0.878108	0.856779	0.834636	0.861442	0.889768	0.918967	0.923449	0.924811	0.910607	0.913015	0.877796	0.823028	0.865995	0.838608	0.77841	0.766785	0.786242
1.60791	1.56428	1.56564	1.62288	1.5351	1.63356	1.67901	1.76052	1.79398	1.76653	1.71408	1.64713	1.67469	1.70472	1.6159	1.67304	1.73436	1.63306	1.4985	1.5438	1.49892	1.32855	1.37369	1.36952	1.36337	1.40431	1.3982	1.37444	1.36578	1.36721	1.32293	1.25733	1.23149	1.19508	1.19628	1.20131	1.27209	1.37197	1.39553	1.45603	1.47539	1.40491	1.38022	1.33525	1.31953	1.3285	1.28642	1.34974	1.37433	1.41653
1.5633	1.50966	1.62053	1.51059	1.41462	1.46853	1.5267	1.41255	1.31427	1.22878	1.15374	0.938474	1.18018	1.58958	1.44767	1.32901	1.22834	1.14184	1.19057	1.19079	1.29559	1.20595	1.12393	1.10916	1.08427	1.12296	1.31439	1.29636	1.27986	1.27378	1.23894	1.21597	1.11206	1.21607	1.29578	1.35032	1.28283	1.27016	1.23086	1.2115	1.27391	1.26589	1.25087	1.1888	1.21645	1.16566	1.15175	1.23647	1.29307	1.29582
																																										1.65718	1.58679	1.52214	1.46255	1.31511	1.43471	1.57825	1.6274
0.774679	0.780536	0.798045	0.801399	0.8004	0.818741	0.851011	0.870135	0.878308	0.881112	0.922562	0.914199	0.926615	0.928235	0.919566	0.922018	0.933421	0.93758	0.903062	0.882282	0.844758	0.83548	0.808831	0.780525	0.76123	0.777159	0.796405	0.807706	0.825135	0.838071	0.813264	0.814152	0.854856	0.875345	0.879386	0.874837	0.871876	0.922327	1.04671	0.974027	0.944201	0.917424	0.923779	0.91665	0.920286	0.927314	0.930751	0.949587	0.962563	0.98964
1.38999	1.27725	1.36458	1.3653	1.46842	1.46744	1.5439	1.55327	1.58821	1.43532	1.46633	1.42246	1.35703	1.35628	1.36642	1.35172	1.36234	1.3456	1.36574	1.3865	1.4111	1.4366	1.46303	1.43318	1.44983	1.46687	1.5174	1.39618	1.47124	1.55551	1.51432	1.50427	1.44054	1.36578	1.32131	1.27964	1.24406	1.25793	1.2542	1.28754	1.26315	1.25365	1.25071	1.29511	1.33378	1.32734	1.26367	1.26514	1.26681	1.25972
1.54786	1.55325	1.53907	1.53966	1.51706	1.45827	1.40387	1.44761	1.39587	1.36394	1.31299	1.2657	1.25866	1.2517	1.27767	1.28487	1.24872	1.2204	1.19516	1.23856	1.21726	1.19705	1.18204	1.16937	1.17261	1.19633	1.20643	1.18585	1.18044	1.17507	1.10179	1.05787	1.00881	0.964097	1.00369	1.04764	0.993106	1.03445	0.996299	0.968912	0.94059	0.972549	0.93776	0.941445	0.945145	1.03097	0.974949	0.924707	0.978525	0.916162
0.998165	0.992141	0.881937	0.825104	0.88917	0.964021	1.05263	1.15919	1.10707	1.09368	1.03973	1.01593	0.980376	0.93229	0.910375	0.893833	0.894577	0.930402	0.924101	0.93099	0.861176	0.886517	0.968075	0.946127	0.925152	0.905086	0.885873	0.842396	0.84146	0.87763	0.873533	0.869475	0.865454	0.86147	0.857522	0.853611	0.878253	0.861026	0.844461	0.824497	0.835862	0.810056	0.794324	0.83616	0.843671	0.8753	0.850506	0.857476	0.831405	0.864904
0.866237	0.823786	0.849016	0.840077	0.835626	0.842352	0.785829	0.789419	0.791726	0.752047	0.782951	0.793808	0.74594	0.757778	0.769998	0.824481	0.828739	0.880681	0.899927	0.920033	0.941057	0.946313	0.950725	0.955177	0.959672	0.964209	0.96879	0.973414	0.978082	0.984853	0.970905	0.957347	0.950329	1.03324	1.11131	1.19627	1.17107	1.20176	1.18816	1.32437	1.30532	1.24888	1.18687	1.15505	1.14872	1.11385	1.14483	1.16028	1.17616	1.18728
0.898383	0.864998	0.876081	0.877058	0.878037	0.877858	0.857163	0.880955	0.889017	0.871585	0.872364	0.902798	0.875817	0.885344	0.914292	0.945198	0.864247	0.852698	0.857564	0.881768	0.910187	0.952607	0.970526	0.970618	0.998663	1.0699	1.14108	1.14806	1.07118	1.14434	1.12486	1.05051	1.00186	0.996854	0.99866	0.994311	1.01249	0.931366	0.976749	0.957105	1.02218	0.969682	0.997869	1.06017	1.04459	1.02946	1.07652	0.938465	1.06724	1.43203
																																																0.472523	0.486299
1.31443	1.28389	1.33039	1.28488	1.33529	1.37358	1.40318	1.41881	1.40743	1.40042	1.38017	1.32459	1.26789	1.20266	1.15455	1.17061	1.18242	1.17473	1.26419	1.22924	1.21286	1.16711	1.18076	1.16062	1.11532	1.10584	1.1408	1.19128	1.24701	1.24436	1.21934	1.17547	1.2093	1.20887	1.20208	1.21927	1.233	1.24704	1.29712	1.38964	1.39124	1.44592	1.5159	1.59299	1.59659	1.55777	1.50735	1.59589	1.55872	1.50165
6.48571	2.39845	1.47126	1.34145	1.18211	1.1117	1.10385	1.18129	1.33515	1.42783	1.39	1.20566	1.05062	1.05539	1.00178	0.984538	1.23924	1.15695	0.996808	0.931041	0.971622	0.898242	0.892322	0.920197	0.866525	0.81985	0.770605	0.766575	0.76056	0.833498	0.823956	0.841547	0.847358	0.880392	0.926812	1.01868	0.872423	0.9901	0.967472	0.941975	0.914184	0.882703	0.868934	0.975471	0.897791	0.991516	1.03308	0.9297	0.89709	0.86669
0.931876	0.922336	0.92725	0.922477	0.904614	0.885557	0.876044	0.860019	0.980158	0.919197	0.938064	0.921789	0.9263	0.918914	0.915983	0.894378	0.873769	0.847052	0.864975	0.904781	0.948427	0.923822	0.930175	0.935125	0.940127	0.945184	0.950295	0.955462	0.960685	0.951998	0.975102	0.978926	0.972999	0.967143	0.961357	0.95564	0.94999	0.961303	0.947018	0.93315	0.928054	0.923013	0.913934	0.902067	0.9084	0.920811	0.917879	0.920854	0.923848	0.932943
1.05191	1.08568	1.05928	1.03804	1.00801	1.00482	0.990557	1.01231	0.977878	0.982456	0.985836	0.984036	0.989419	1.0453	1.02892	1.02808	0.994165	0.950899	0.934719	0.902062	0.916714	0.909513	0.902424	0.899054	0.91879	0.982899	1.08317	1.09665	1.09044	1.07963	1.046	0.997745	0.973816	0.930103	0.912879	0.914405	0.921682	0.926898	0.93665	0.940744	0.93369	0.953579	0.962684	0.948285	0.931184	0.938367	0.899508	0.951654	0.994792	1.01176
1.20752	1.19863	1.19342	1.15534	1.13104	1.12392	1.09428	1.15197	1.14463	1.16949	1.17224	1.12545	1.1171	1.0811	1.06654	1.13428	1.16801	1.20382	1.15658	1.15121	1.1459	1.14063	1.13541	1.19965	1.1862	1.15688	1.21218	1.208	1.20385	1.19972	1.22102	1.24309	1.19513	1.22821	1.26317	1.24677	1.17982	1.11969	1.0487	1.07415	1.10038	1.1218	1.14408	1.13983	1.14775	1.10422	1.03999	1.02273	1.00604	0.989877
0.79311	0.819952	0.835852	0.832353	0.860255	0.860254	0.865953	0.85073	0.835051	0.874897	0.943844	0.937841	0.921905	0.845881	0.769685	0.751642	0.742479	0.75986	0.778074	0.782354	0.759635	0.75167	0.730957	0.753666	0.804979	0.824415	0.853103	0.838702	0.854134	0.834092	0.775217	0.787338	0.799845	0.784081	0.789567	0.798517	0.759177	0.751862	0.743652	0.694673	0.726394	0.853594	0.715989	0.71342	0.692115	0.657029	0.669056	0.690877	0.692807	0.713143
1.08439	1.1205	1.17668	1.18246	1.12115	1.07504	1.08436	1.02606	0.980389	0.966893	1.05362	1.11184	1.11834	1.14494	1.06746	1.06495	1.0519	1.03255	1.04278	1.0538	0.997285	1.041	1.08872	1.08044	1.10321	1.05363	1.16771	1.07148	1.02345	1.00837	1.0085	1.02631	1.08961	1.07769	1.11814	1.05245	1.09551	0.981254	0.956847	0.984944	0.970329	0.923856	0.960546	0.962423	1.02703	1.0121	1.14705	1.08003	1.0447	1.12218
0.84312	0.862476	0.898761	0.945614	0.977679	0.98231	0.970539	0.877671	0.873934	0.870229	0.866555	0.862912	0.8593	0.855718	0.852165	0.848642	0.836182	0.759579	0.763121	0.766697	0.770306	0.773949	0.777627	0.78134	0.785089	0.788874	0.792192	0.795538	0.798912	0.802315	0.805748	0.809209	0.7826	0.757684	0.734306	0.69274	0.655628	0.740837	0.720894	0.711509	0.727309	0.701996	0.678385	0.656311	0.635629	0.721085	0.609915	0.66798	0.738264	0.729104
1.62552	1.61153	1.29669	1.64299	1.43225	1.60063	1.47385	1.38481	1.45852	1.4147	1.34208	1.39436	1.30313	1.34364	1.36662	1.44624	1.40902	1.4206	1.43403	1.41881	1.39095	1.3228	1.37006	1.24679	1.30259	1.32086	1.16813	1.23147	1.23713	1.26304	1.28203	1.1178	1.18247	1.19727	1.13143	1.07246	1.09203	1.06069	1.11306	1.14146	1.17134	1.05691	1.26391	1.06395	1.23082	1.14225	1.31581	1.11404	1.11155	1.04571
0.89076	0.90616	0.889123	0.948677	1.01678	1.05005	1.11661	1.10835	1.12023	1.16087	1.12273	1.14556	1.14777	1.14999	1.18815	1.18319	1.17827	1.1552	1.13302	1.14022	1.13879	1.07918	1.07446	1.04889	1.06714	1.08441	1.10227	1.09284	1.11403	1.07665	1.03166	1.00628	0.994212	0.99487	1.01717	1.04691	1.02333	1.03974	1.13165	1.09422	1.03673	1.0774	1.08481	1.05875	1.12238	1.10425	1.09523	1.09771	1.1099	1.19726
4.34455	4.70511	5.09205	4.66183	4.29864	4.59567	4.19992	4.52832	4.41735	4.31169	4.21096	4.11484	4.023	3.93517	3.8472	3.90714	3.53706	3.23624	3.81001	3.92981	3.79424	3.66771	3.76519	3.86799	3.97656	3.67446	3.41502	3.42296	3.23151	3.23212	3.23657	3.23049	3.22442	3.21838	3.21237	3.20637	3.2004	3.1957	3.25368	3.3138	3.37618	3.44096	3.38659	3.33391	3.39626	3.46097	3.52821	3.5981	3.67082	3.74655
0.96166	0.920214	0.959716	0.905551	0.930865	0.904974	0.836515	0.819727	0.909433	0.847209	0.874377	0.95179	0.9037	0.980786	0.99667	0.841014	0.96767	1.03232	0.980931	1.12185	1.07803	1.11373	1.11648	1.21044	1.28304	1.32252	1.25972	1.12324	1.27245	1.25555	1.05821	1.35407	1.23448	1.21957	1.44292	1.27602	1.34587	1.4238	1.51132	1.44447	1.38328	1.32707	1.27524	1.22731	1.18286	1.14151	0.967848	1.20028	0.949032	0.784761
	0.823436	0.806649	0.79876	0.827756	0.868384	0.853202	0.874609	0.887409	0.898144	0.910063	0.917722	0.930009	0.930046	0.928649	0.919616	0.933954	0.921662	0.906725	0.895755	0.905788	0.916338	0.897025	0.886415	0.873919	0.869823	0.860988	0.885676	0.881727	0.888845	0.89705	0.905128	0.998646	0.900546	0.868068	0.82323	0.809329	0.785427	0.782587	0.779768	0.761087	0.737991	0.743815	0.757516	0.785609	0.795515	0.82291	0.809302	0.805018	0.82114
		3.89316	4.3855	4.72079	5.22948	5.45408	5.69884	5.73597	5.41078	5.16276	4.85249	5.16195	5.14916	5.30309	5.35344	5.68884	5.84092	5.63003	5.15834	4.55542	4.24254	3.9808	3.64053	3.23802	2.77576	2.97136	2.89966	2.7851	2.75094	2.7462	2.43515	2.40839	2.3607	2.31486	2.3647	2.41673	2.4711	2.52798	2.45241	2.27034	2.29233	2.31476	2.3973	2.42398	2.45125	2.47915	2.50768	2.53689	2.56678
			1.12221	1.19068	1.12216	1.18889	1.15486	1.1283	1.14411	1.11186	1.1065	1.06908	0.97434	0.939487	0.910887	0.953915	0.945772	0.949147	0.97264	0.968185	1.01971	1.03913	1.03658	0.981786	1.02975	1.0371	1.04456	1.07281	1.1724	1.16289	1.17421	1.16047	1.19201	1.34131	1.28054	1.25197	1.31928	1.33347	1.40001	1.34119	1.35442	1.31871	1.27975	1.29504	1.2544	1.23245	1.22061	1.17844	1.23801
																																				1.51411	1.49368	1.47379	1.45443	1.43128	1.40886	1.38713	1.36606	1.42914	1.49834	1.57458	1.63064	1.69085	1.75568
			0.931732	0.927476	1.00115	0.960304	1.02628	0.962326	0.973097	0.988115	0.963488	0.964303	0.978868	0.97805	0.931408	0.941136	0.932566	0.958819	0.985027	0.97175	0.994125	0.96351	0.958288	0.949828	0.944873	0.972714	0.953215	1.02045	1.0388	0.935596	0.927173	0.972083	1.04276	1.02274	0.943561	1.00738	0.90522	0.969251	0.943418	0.980287	0.976696	0.946752	1.00983	1.00984	0.949959	0.98175	0.974537	0.967429	0.960424
				1.10062	1.13258	1.11402	1.16919	1.11356	1.06767	1.01849	0.932846	1.13386	0.902604	0.891655	0.85997	0.808343	0.801262	0.835312	0.856573	0.881683	0.894279	0.844736	0.860465	0.84905	0.862508	0.859286	0.840926	0.800406	0.75421	0.744303	0.742961	0.742311	0.738513	0.724079	0.731059	0.725052	0.719867	0.707392	0.706232	0.665502	0.632104	0.60933	0.619865	0.614569	0.688979	0.659077	0.675834	0.691481	0.686388
								0.954713	0.957254	1.08729	1.13281	1.09616	1.06181	1.02954	1.01764	1.19722	1.16495	1.1383	1.10452	1.08241	1.03338	0.996861	0.998064	0.985676	0.973592	0.993018	0.968084	0.944371	0.955601	0.967101	0.878206	0.923654	0.908357	0.925753	0.902091	0.895341	0.885308	0.887864	0.8526	0.820031	0.872394	0.854699	0.863405	0.843022	0.847592	0.852212	0.860033	0.874328	0.870453
										1.00305	1.04476	1.03501	1.0382	1.02004	1.02928	1.03869	1.0364	1.03412	0.945407	0.973493	0.981397	0.98943	0.997596	1.0059	1.02054	1.05893	1.10034	1.07051	1.04227	1.12377	1.1297	1.11352	1.0978	1.07895	1.06074	1.046	1.03165	0.999428	0.969155	0.940661	0.913796	0.888422	0.864419	1.04187	1.18246	1.18239	1.18232	1.23571	1.25352
																1.1802	1.13306	1.1215	1.05172	1.08518	1.12085	1.09132	1.05044	1.01251	1.04263	1.07465	1.00291	0.850505	0.738312	0.728845	0.747801	0.771735	0.765743	0.762433	0.745902	0.747981	0.745755	0.759734	0.766593	0.773413	0.757216	0.750256	0.744709	0.739568	0.71434	0.684474	0.671643	0.668512	0.664396
																																						9.55989	10.302	10.973	11.2453	11.5314	10.9532	10.4303	9.95498	9.52112	9.1235	8.75776	8.41124
																																			0.893162	0.894436	0.895713	0.849768	0.871777	0.894957	0.927351	0.898338	0.936501	0.928983	0.921585	0.930357	0.939297	0.92176	0.87452
																																		1.41407	1.35204	1.40962	1.51071	1.51349	1.51628	1.50438	1.4347	1.38924	1.40491	1.39641	1.36536	1.39058	1.46195	1.43584	1.41218
																																										1.00028	0.997975	1.02968	0.991666	0.956361	0.953786	0.942939	0.905926
1.55204	1.54707	1.57623	1.5914	1.85043	1.9343	1.59515	1.64006	1.65061	1.59142	1.60063	1.63205	1.63435	1.61073	1.55181	1.53135	1.53936	1.539	1.57921	1.61771	1.64419	1.65096	1.64685	1.60285	1.61406	1.65156	1.62148	1.55765	1.52761	1.49606	1.50187	1.47436	1.47269	1.45488	1.43116	1.41381	1.37746	1.33976	1.33276	1.30191	1.31387	1.29374	1.27614	1.24355	1.20889	1.21902	1.26369	1.22149	1.21186	1.20924
2.7576	1.79206	2.10989	1.40049	1.14272	0.965093	0.806283	0.692354	0.781441	0.721992	0.685538	0.751009	0.79931	0.751294	0.648677	0.71791	0.682257	0.657902	0.722308	0.642813	0.570542	0.560427	0.600631	0.652503	0.709046	0.61748	0.546858	0.53572	0.558463	0.593974	0.59248	0.61259	0.622536	0.617738	0.625022	0.653747	0.706658	0.701986	0.775637	0.750764	0.843294	0.884917	0.920026	1.04706	0.942398	1.06853	1.46056	2.30695	2.69315	2.38351
0.745547	0.774369	0.74815	0.745187	0.725275	0.681928	0.679742	0.672456	0.647031	0.625124	0.622705	0.629575	0.633758	0.66574	0.676023	0.665211	0.662043	0.676939	0.701166	0.721062	0.720486	0.738144	0.757695	0.75808	0.750568	0.765128	0.771243	0.760436	0.773425	0.78448	0.789253	0.792332	0.793922	0.804384	0.793219	0.775932	0.769723	0.769786	0.756975	0.754079	0.762446	0.76715	0.780596	0.773249	0.774102	0.784285	0.795667	0.806732	0.803649	0.815463
1.01899	0.956129	0.905748	0.925572	0.989507	1.02267	0.909117	0.954236	0.937753	1.01803	1.00192	1.00871	1.03428	1.04317	0.980765	0.956528	0.883515	0.880447	0.8774	0.863209	0.853803	0.835216	0.85589	0.869666	0.891561	0.939787	0.906589	0.812368	0.935007	0.89771	0.903658	0.906838	0.952918	0.881365	0.828822	0.849059	0.873372	0.882694	0.896966	0.857688	0.850988	0.804062	0.803391	0.794259	0.766353	0.761758	0.748261	0.76675	0.786608	0.807521
1.28316	1.25799	1.28608	1.32853	1.36962	1.4084	1.42598	1.39203	1.38636	1.35285	1.34316	1.35443	1.36589	1.34218	1.28186	1.26879	1.24137	1.21511	1.17429	1.13962	1.14837	1.17711	1.19038	1.18174	1.18681	1.16814	1.1729	1.17101	1.16826	1.14315	1.1185	1.12473	1.12151	1.14934	1.17096	1.17005	1.163	1.18971	1.18977	1.20092	1.19808	1.27008	1.32127	1.31128	1.21321	1.11451	1.0562	1.0947	1.13177	1.17244
0.92479	0.928981	0.94838	0.954398	0.961387	0.997673	1.03732	1.04601	1.02879	1.03845	1.05027	1.02356	1.0488	1.04197	1.05103	1.07661	1.09232	1.11505	1.10736	1.05521	1.04806	1.04517	1.04316	1.05599	1.05244	1.05783	1.03984	1.07404	1.08965	1.07161	1.07207	1.09165	1.15851	1.16761	1.1415	1.11584	1.07748	1.09912	1.07056	1.15164	1.07435	1.20062	1.21241	1.06552	1.08922	1.10144	1.11342	1.12896	1.11093	1.126
0.965745	0.989728	1.01158	1.01724	1.00595	1.02389	1.05414	1.06548	1.07933	1.05137	1.05553	1.03111	1.0248	1.02362	1.00779	1.03984	1.04766	1.04906	1.02317	1.06784	1.02656	1.02795	1.02012	1.01025	0.994524	0.970661	0.998402	0.985691	0.993994	1.00646	0.999184	1.00042	1.00657	1.01279	1.01908	1.01477	1.01531	0.985046	0.978197	0.948822	0.950777	0.955205	0.941409	0.948746	0.949423	0.961297	0.962999	0.943996	0.962379	0.981493
1.21855	1.16936	1.21899	1.23572	1.25377	1.18062	1.17138	1.15004	1.23309	1.33737	1.33777	1.38773	1.38435	1.33254	1.35681	1.38746	1.39882	1.3888	1.5366	1.60285	1.64299	1.68518	1.7296	1.77652	1.72905	1.48841	1.38646	1.30466	1.32012	1.31517	1.30296	1.28904	1.3368	1.32214	1.31953	1.30788	1.3575	1.24036	1.29719	1.31524	1.31638	1.33339	1.36052	1.37412	1.33513	1.23475	1.27744	1.3102	1.34963	1.41923
0.868275	1.11974	0.958174	0.950489	1.08579	1.51597	2.51069	7.30176	6.86465	5.14111	3.5806	2.74684	2.22803	1.87407	1.61715	1.42219	1.32911	1.19556	1.12746	1.11627	1.122	1.07776	1.05779	1.07714	1.08293	1.1461	1.15226	1.17236	1.19354	1.22605	1.19871	1.18327	1.2759	1.27022	1.31284	1.33061	1.35169	1.39201	1.52967	1.73022	1.9913	2.34516	2.85196	3.22221	3.18318	3.14664	3.19951	2.8356	3.09219	3.10065
																												6.90696	6.72778	6.55766	6.39593	6.19538	6.8765	7.5706	6.65755	4.82555	5.40728	4.94678	5.10712	4.52061	3.92891	3.70087	4.02879	4.09656	4.14772	4.48178	4.76657	4.35966	3.97936
1.21161	1.1709	1.14657	1.13539	1.12178	1.12938	1.14622	1.12952	1.12496	1.12341	1.1253	1.14655	1.1611	1.17603	1.17737	1.16769	1.2009	1.22024	1.20844	1.18957	1.18138	1.16283	1.14904	1.14678	1.15409	1.17976	1.19641	1.19515	1.20958	1.23128	1.26633	1.27902	1.30665	1.32526	1.34887	1.3748	1.37702	1.38913	1.381	1.356	1.36761	1.37784	1.36557	1.32094	1.31182	1.30283	1.31552	1.30877	1.28663	1.28653
1.44662	1.46061	1.46136	1.47898	1.48026	1.48837	1.46272	1.45326	1.48057	1.5245	1.44567	1.45736	1.46172	1.48001	1.52904	1.48704	1.48472	1.46533	1.44644	1.46575	1.48499	1.46457	1.40096	1.39286	1.37577	1.36055	1.39868	1.37554	1.4036	1.43261	1.38097	1.43694	1.4325	1.38443	1.39805	1.38043	1.36325	1.3465	1.36011	1.39052	1.36846	1.33881	1.32155	1.38481	1.36007	1.33414	1.33728	1.31593	1.36484	1.36636
0.884124	0.886425	0.832836	0.938704	0.876916	0.875853	0.920427	0.951214	0.984133	1.01058	1.03848	1.09112	1.17784	1.19403	1.10048	1.12793	1.15678	1.21172	1.16805	1.28884	1.15295	1.15893	1.18104	1.32265	1.28768	1.16629	1.12341	1.21017	1.11529	1.03421	0.858615	0.794327	0.750423	0.725053	0.712595	0.711101	0.852224	0.840977	0.877395	0.855341	0.85018	0.836137	0.775687	0.786691	0.786211	0.796657	0.749974	0.792247	0.816357	0.841981
0.994664	1.01149	1.01943	1.01102	1.13274	1.06935	1.03917	0.994013	0.95111	0.948688	1.13508	1.13383	1.15307	1.26152	1.40522	1.35472	1.05113	1.05693	1.02936	1.00829	1.01867	1.07295	1.13672	1.14574	1.16107	1.24004	1.29709	1.34172	1.59795	1.64426	1.72915	1.56653	1.52039	1.47688	1.59786	1.54472	1.55428	1.45024	1.44443	1.60097	1.65553	1.71395	1.84329	1.84292	1.76964	1.64442	1.57745	1.56964	1.6067	1.69082
1.31965	1.25729	1.26717	1.25242	1.2377	1.1844	1.19565	1.19471	1.16987	1.11493	1.10739	1.04172	1.08256	1.02991	1.03903	1.07137	1.07798	1.12191	1.13262	1.14967	1.12776	1.10048	1.0939	1.13886	1.14867	1.19071	1.19124	1.15511	1.13834	1.14026	1.14586	1.12889	1.11931	1.1099	1.10064	1.09987	1.09911	1.09834	1.0901	1.10614	1.1096	1.11308	1.08613	1.08029	1.07125	1.05876	1.06178	1.03488	0.989766	1.00924
1.6625	1.80788	1.97326	2.0493	2.14923	2.0876	2.0477	2.16386	2.09407	1.63865	1.61445	1.59095	1.55306	1.67385	1.73272	1.79256	1.87188	1.88535	1.87667	1.89173	1.84584	1.7266	1.46929	1.43169	1.30312	1.23571	1.17987	1.16616	1.16304	1.27308	1.22222	1.23083	1.22862	1.17643	1.18775	1.22707	1.2842	1.30381	1.33421	1.36862	1.3823	1.43238	1.36235	1.38096	1.42292	1.42067	1.4332	1.45405	1.43283	1.45987
1.19158	1.1231	1.14159	1.20444	1.21733	1.219	1.24401	1.34994	1.39989	1.3443	1.31483	1.26807	1.20807	1.22713	1.24608	1.19815	1.19992	1.17292	1.18495	1.15018	1.15148	1.1085	1.09351	1.06648	1.04037	1.07324	1.05041	1.0449	1.05705	1.06822	1.08689	1.13503	1.1172	1.06308	1.05	1.03195	1.0176	1.03028	1.04409	1.06283	1.09273	1.15895	1.16715	1.17314	1.11373	1.10459	1.10334	1.14099	1.15191	1.1291
1.87266	1.78324	1.95399	1.8524	1.72422	1.61263	1.91056	2.34353	2.03628	1.80025	1.61325	1.55565	1.50202	1.65743	1.58519	1.62772	1.6726	1.58286	1.62595	1.66061	1.69678	1.92823	1.84068	1.6447	1.74638	1.67446	1.83907	1.72511	2.01286	1.9872	2.19432	2.44963	2.72414	2.62908	2.51481	2.52713	2.56692	2.47535	2.68216	2.6707	2.62893	2.51494	2.52228	2.72316	2.68064	2.55041	2.34836	2.24611	2.24904	2.44474
1.12794	1.19216	1.13394	1.09959	1.06725	1.02358	1.02837	0.993006	0.979445	0.957406	1.02979	1.02479	1.06443	1.06224	1.07774	1.05285	1.06356	1.03423	1.00647	0.980159	0.955191	0.932648	0.946931	0.937601	0.928453	0.919482	0.90949	0.927908	0.927928	0.935228	0.942643	0.925233	0.919345	0.913532	0.918367	0.935692	0.988294	1.00037	0.951285	0.951117	0.939471	0.948875	0.971673	0.992023	1.01822	1.01945	1.0367	1.02403	1.01746	1.02307
1.58256	2.19998	1.92329	2.01175	2.35871	2.32111	1.86003	1.55177	1.44746	1.40258	1.36041	1.3207	1.28323	1.24784	1.21435	1.1826	1.15248	1.12385	1.19464	1.1648	1.07627	1.14123	1.17426	1.17108	1.18655	1.17437	1.16243	1.31931	1.30126	1.26857	1.38298	1.4259	1.47156	1.52024	1.87395	1.68546	1.53142	2.12552	1.60535	2.43849	2.34414	2.25453	1.71151	1.63132	2.16011	1.64036	1.64502	1.64576	1.77758	1.63655
1.45632	1.47937	1.43019	1.31058	1.40989	1.40408	1.39833	1.34069	1.21687	1.11399	1.05346	1.04374	1.03421	1.09672	1.14692	1.17732	1.21686	1.17754	1.27798	1.31273	1.35501	1.30326	1.31856	1.3073	1.20235	1.11055	1.0752	1.05087	1.07566	1.03637	0.969338	0.984142	0.997311	1.04534	1.09822	1.16556	1.171	1.12979	1.08263	1.08795	1.0629	1.06757	1.07346	1.11608	1.13286	1.18656	1.17892	1.2122	1.25584	1.23952
																											3.09664	3.27803	3.48199	3.71302	3.51928	3.34475	3.59564	4.3311	3.96499	4.01766	4.08997	4.09124	4.25908	4.43013	4.48087	4.5779	4.67923	4.7231	4.88545	4.83736	4.86788	4.92043	4.85602
4.73181	4.32209	3.66843	3.64265	3.53438	2.97282	3.02399	3.07696	3.13182	2.72968	2.41906	2.90998	2.72527	3.0354	2.81931	2.78246	2.74656	2.3196	2.00753	1.76947	1.58189	1.43026	1.30516	1.20018	1.11084	1.0805	1.05178	1.02455	0.972503	1.00117	0.97077	0.942159	0.919186	0.897306	0.876443	0.857195	0.838774	0.821128	0.866344	0.856283	0.846453	0.836845	0.782917	0.83126	0.786496	0.839257	0.814926	0.807466	0.785182	0.846483
																																	3.91867	5.0056	4.97658	4.94791	4.5943	5.36422	5.51715	4.46539	3.75043	4.20837	4.79369	7.58181	7.23777	7.09251	6.95297	6.81882	6.68974
																																1.6648	1.78226	1.57967	1.50526	1.43755	1.30699	1.34254	1.309	1.3888	1.25721	1.2262	1.19676	1.04262	0.929125	0.975147	0.867288	0.83098	0.790795
1.01236	0.977381	1.02279	1.00169	0.981455	0.962017	0.943335	0.925364	0.895134	0.972623	0.964518	0.956546	0.963994	0.971558	0.979242	0.981089	0.982944	0.984805	0.986674	0.988549	0.972288	0.956553	0.951508	0.956342	0.958742	0.928298	0.917118	0.906203	0.895047	0.884162	0.901974	0.895192	0.899528	0.909782	0.920273	0.933123	0.946337	0.921128	0.930356	0.937384	0.98184	0.978784	0.975747	1.01099	1.01384	1.0167	1.05941	1.0555	1.10745	1.13552
1.26556	1.33397	1.50338	1.50348	1.46508	1.48269	1.47169	1.59047	1.42247	1.37599	1.45111	1.51241	1.51556	1.55905	1.44059	1.4771	1.5155	1.49834	1.38182	1.44549	1.46142	1.68944	1.61725	1.55099	1.48994	1.48383	1.50448	1.52572	1.45036	1.44473	1.45331	1.462	1.53813	1.46763	1.46008	1.46332	1.41361	1.43815	1.5119	1.35655	1.31251	1.27311	1.46713	1.37448	1.46243	1.42231	1.47106	1.51721	1.48543	1.44072
1.24575	1.25726	1.2684	1.32034	1.26655	1.30958	1.29555	1.30579	1.3162	1.2606	1.27051	1.26134	1.27531	1.23264	1.21917	1.19961	1.20054	1.1477	1.12652	1.151	1.12755	1.11773	1.07236	1.03053	0.991837	1.00236	1.07448	0.960616	0.946046	0.921944	1.05715	0.997405	0.995718	0.959139	0.925328	0.894999	0.970033	0.917069	0.825567	0.873167	0.934451	0.875732	0.902898	0.859525	0.820129	0.818693	0.797008	0.814934	0.833684	0.811845
							34.9889	19.7845	25.8849	20.9467	14.0243	9.15348	7.86265	7.50859	10.1465	14.185	19.3164	19.8383	19.2939	18.7785	17.7067	17.7231	15.9476	16.0451	15.3203	9.70973	15.2569	15.0411	16.0779	13.5958	15.7395	15.0673	14.3662	11.842	12.0365	12.4436	11.1188	11.9855	12.3548	12.4765	12.6007	13.118	14.5233	14.0475	13.9386	12.9619	11.7159	14.1353	19.1216
0.578905	0.557438	0.595426	0.568731	0.665829	0.687746	0.778869	0.672818	0.658933	0.69396	0.707848	0.708515	0.776018	0.769286	0.793433	0.833499	0.846168	0.83222	0.805748	0.82301	0.834366	0.845197	0.839845	0.849569	0.875101	0.898992	0.907492	0.915896	0.957032	0.952618	0.944035	0.950108	0.945138	0.976691	1.01749	1.04251	1.06113	1.07788	1.09431	1.06284	1.05255	1.03397	1.05071	1.0535	1.0825	1.09777	1.10282	1.14501	1.12686	1.16198
0.807368	0.808645	0.830721	0.884601	0.934007	0.991684	1.06143	1.05672	1.01082	0.974608	0.977552	0.932975	0.969951	0.99012	1.153	1.22053	1.21493	1.122	1.07573	1.03102	1.08407	1.03587	0.979867	0.92383	0.914695	0.938376	0.917725	0.997247	1.07333	1.06623	1.09616	1.0826	1.02171	0.962525	0.992542	0.972466	1.0206	1.01847	0.95829	1.01951	0.943571	0.943527	0.932767	0.937215	0.947906	0.960042	0.978248	0.943575	0.902493	0.887866
0.917245	0.869283	0.860294	0.914684	0.971027	0.938996	0.987178	1.01862	1.04553	1.00065	0.999505	0.983472	0.997037	1.0322	1.00108	0.985792	0.970967	0.956582	1.00784	1.0012	0.957119	0.92613	0.868894	0.864294	0.82989	0.798477	0.732905	0.751601	0.771277	0.775701	0.7712	0.809781	0.800825	0.856865	0.817559	0.776531	0.765556	0.716421	0.723991	0.690869	0.679518	0.689993	0.664558	0.693006	0.675941	0.655929	0.6452	0.637941	0.593136	0.652803
1.05405	1.05464	1.07704	1.12645	1.12867	1.03756	1.04159	1.08571	1.0697	1.05415	1.03905	1.02438	1.01011	0.982479	0.962673	0.953873	0.945233	0.9476	0.949979	0.939134	0.939603	0.942177	0.944764	0.947367	0.949983	0.952614	0.95863	0.964723	0.975113	0.938524	0.953774	0.94578	0.881733	0.934793	0.938774	0.935151	0.928048	1.07366	1.27347	1.28288	1.29244	1.30214	1.35131	1.32924	1.30788	1.2872	1.26717	1.26399	1.26084	1.2577
0.826441	0.784838	0.761076	0.745596	0.736685	0.727985	0.740615	0.726118	0.758407	0.78881	0.821753	0.82872	0.857241	0.846176	0.938905	1.02962	1.06976	1.02546	1.03092	1.07117	1.07944	1.1741	1.24428	1.29937	1.31707	1.33073	1.29858	1.29976	1.26646	1.16494	1.10378	1.11281	1.1198	1.07286	1.08156	1.04983	1.13936	1.14008	1.09082	1.08473	1.07872	1.12223	1.08321	1.0434	0.995947	1.00698	1.00861	1.01025	0.996049	0.972558
												1.34302	1.35468	1.18839	1.19258	1.21554	1.27611	1.2712	1.26634	1.33099	1.28814	1.27913	1.27514	1.29452	1.27756	1.26104	1.26462	1.2187	1.176	1.13619	1.09898	1.174	1.13864	1.10535	1.07396	1.10038	1.08977	1.07752	1.06555	1.05384	1.04239	1.06013	1.07162	1.01368	1.02873	1.02758	1.03388	1.02056	0.983722
1.0711	1.11966	1.04694	0.877504	1.1291	1.00774	0.909942	0.827189	0.887765	1.04887	0.937175	0.913734	0.965096	1.00481	1.0584	1.1032	1.12935	1.24391	1.37042	1.4961	1.42231	1.3002	1.24229	1.23278	1.2682	1.27469	1.38923	1.39174	1.29326	1.22669	1.23379	1.21593	1.24209	1.18346	1.12977	1.02846	1.07207	1.11954	1.17142	1.24957	1.06402	1.06341	1.06281	1.06496	0.878012	1.06507	1.09194	1.1202	1.10336	1.06637
1.33386	1.31566	1.40863	1.4141	1.41961	1.46555	1.64682	1.50301	1.38231	1.5414	1.60528	1.62403	1.58956	1.62453	1.62125	1.61799	1.6586	1.5184	1.40006	1.29883	1.24502	1.44621	1.31775	1.21025	1.28722	1.37464	1.4748	1.52341	1.54093	1.54876	1.55666	1.37629	1.53849	1.42919	1.429	1.51846	1.43616	1.54973	1.53526	1.56958	1.63705	1.65704	1.67752	1.56803	1.55454	1.44675	1.47048	1.39487	1.31823	1.3063
1.14839	1.16239	1.16465	1.15079	1.11492	1.15107	1.10882	1.08657	1.10417	1.06134	1.05325	1.05609	1.00168	1.01542	1.02138	0.988649	0.978723	0.927716	0.898044	0.856952	0.848267	0.780645	0.723009	0.803585	0.904373	1.00867	1.00874	0.919215	0.971854	0.96356	1.05828	1.00137	1.03073	0.930908	0.953727	1.0056	1.02914	1.05382	1.16781	1.16317	1.0368	0.935192	1.11905	1.04371	1.07381	1.1057	1.13953	1.17551	1.21382	1.25472
0.804508	0.827894	0.841512	0.834837	0.884793	0.874898	0.934402	0.903802	0.908013	0.858572	0.814236	0.849162	0.887218	0.928846	0.974572	0.962055	0.923183	0.88733	0.796263	0.722149	0.66195	0.626463	0.594588	0.588244	0.582033	0.580591	0.584419	0.623984	0.577755	0.551173	0.491747	0.480354	0.46675	0.482313	0.498949	0.516774	0.53592	0.556539	0.578809	0.602935	0.629159	0.652857	0.67841	0.706046	0.697473	0.674441	0.68469	0.68922	0.661324	0.638667
0.552703	0.595369	0.666266	0.622297	0.62918	0.636218	0.643414	0.595345	0.561198	0.597318	0.67915	0.760944	0.710641	0.690403	0.64336	0.664603	0.665876	0.72519	0.727168	0.738	0.721624	0.722885	0.738853	0.728074	0.753848	0.779818	0.795404	0.811626	0.787915	0.764783	0.742971	0.722369	0.702878	0.684412	0.666891	0.650244	0.68125	0.715361	0.753067	0.79497	0.84181	0.894517	0.954263	1.02256	1.00003	0.97847	0.95782	0.938023	0.919028	0.980845
	0.625022	0.666033	0.7084	0.780305	0.802022	0.844604	0.855284	0.936551	0.968006	0.919395	0.875432	0.823291	0.805135	0.821874	0.781175	0.808788	0.838424	0.852639	0.843153	0.860104	0.813011	0.85416	0.833521	0.819785	0.88439	0.903693	0.884426	0.915513	0.933883	0.901014	0.929744	0.941606	0.781674	0.867688	0.974972	1.05706	1.06183	1.06665	0.843729	1.03573	1.06708	1.0656	1.0425	0.999504	1.08109	1.03415	0.997004	0.95748	0.951376
	1.84337	2.17529	2.3351	2.55547	2.08243	1.83186	1.29304	1.35579	1.22311	1.30388	1.00679	1.15492	1.09883	1.05698	0.950653	0.893136	0.878229	1.03777	1.14124	1.07405	1.13557	1.08245	1.11808	1.06877	1.02383	1.00682	0.961478	0.906648	0.876129	0.819052	0.769576	0.759896	0.786091	0.75445	0.743217	0.730167	0.731677	0.763246	0.794368	0.812584	0.816192	0.791095	0.801287	0.730143	0.680697	0.668787	0.785264	0.6622	0.75724
																														0.787019	0.716731	0.706823	0.760545	0.772222	0.797209	0.823869	0.850553	0.869885	0.904219	0.88547	0.868942	0.808373	0.836215	0.829908	0.86465	0.810192	0.848048	0.815848	0.811468
		1.99987	2.75113	1.98988	1.97964	1.94374	1.98733	1.98227	2.01738	3.27306	2.08015	2.2003	3.60082	3.7988	2.07981	3.17364	2.53133	2.95572	2.63709	2.84952	2.98281	2.61625	2.71834	4.09722	2.85227	2.64623	2.72587	2.47451	3.4153	3.54636	3.27483	3.45015	3.47448	3.48887	3.53236	3.60935	4.06524	3.9496	3.58607	3.77351	3.86323	4.07563	3.93946	4.20537	3.90574	3.91216	3.94593	3.9803	3.75797
			0.969977	0.90119	0.841512	0.950506	1.03951	0.920889	0.843986	0.908533	0.90364	0.898799	0.89401	0.889272	0.792432	0.875485	0.799123	0.773013	0.834971	0.907727	0.950256	0.883166	0.840711	0.913668	0.828559	0.898473	1.05293	1.11064	0.974452	0.962913	0.922192	0.884775	0.850276	0.818367	0.788766	0.868919	0.967205	0.793822	0.792891	0.816763	0.814415	0.82596	0.76061	0.769382	0.77836	0.787549	0.796958	0.806594	0.810753
		1.27517	1.25185	1.23534	1.11149	1.0819	1.07879	1.07377	1.03542	1.04912	1.12293	1.11928	1.20458	1.19133	1.16743	1.29785	1.21273	1.33839	1.34566	1.353	1.34243	1.39492	1.34672	1.21164	1.25127	1.24636	1.17911	1.20072	1.27462	1.24194	1.24535	1.18428	1.17	1.21919	1.15575	1.13852	1.10957	1.08592	1.12301	1.16241	1.19131	1.15495	1.17926	1.08699	1.21673	1.12691	1.10708	1.18929	1.25479
			0.97075	0.938427	0.985292	1.02964	1.0186	0.984523	0.975702	0.940397	0.880811	0.869543	0.844812	0.777946	0.769667	0.761564	0.72326	0.711674	0.707562	0.683985	0.661929	0.64125	0.628224	0.598409	0.606067	0.603095	0.571606	0.569392	0.550462	0.552653	0.565979	0.53238	0.551739	0.550189	0.544776	0.519857	0.503465	0.518179	0.496041	0.508496	0.503792	0.525252	0.529112	0.516102	0.468572	0.463089	0.482907	0.494575	0.537636
																																										1.11487	1.18147	1.25653	1.22704	1.2089	1.15626	1.14277	1.06929
			0.476478	0.470121	0.463931	0.530701	0.619923	0.695334	0.791632	0.836965	0.887804	1.1126	1.35362	1.78574	1.98804	2.21746	2.29738	2.3232	2.42088	2.44972	2.37473	2.29547	2.1315	2.10658	1.98196	1.95528	1.93338	2.02638	2.03425	2.07341	2.06793	2.05255	1.96491	1.87739	1.86123	1.88425	2.08123	2.11447	2.12381	2.16461	2.22488	2.25787	2.16256	2.27387	2.18786	2.23936	2.17053	2.07797	1.98864
			0.856601	1.01673	1.22404	0.964816	0.95437	1.00677	1.04752	1.05548	1.0087	1.00544	1.0022	0.911037	1.02667	0.920434	1.01045	0.881505	0.781748	0.776985	0.804691	0.795802	0.801525	0.852099	0.850381	0.875193	0.901497	0.929431	1.06699	1.25235	1.51565	1.53838	1.6052	1.67808	1.64365	1.6106	1.7297	1.86783	1.79607	1.92096	1.86361	1.50293	1.25922	1.5541	2.02933	1.94505	1.92264	1.69969	1.52307
				1.29346	1.29811	1.31134	1.28072	1.33698	1.33933	1.34755	1.33223	1.36755	1.35538	1.34344	1.40873	1.4807	1.47429	1.48144	1.41389	1.3906	1.36806	1.34624	1.33876	1.31443	1.19699	1.24358	1.25444	1.17922	1.14639	1.21776	1.18211	1.09616	1.10073	1.12456	1.14945	1.17126	1.20343	1.19718	1.21543	1.21575	1.19726	1.31724	1.35638	1.34108	1.38849	1.35366	1.29613	1.30538	1.29206
				0.940665	1.0773	1.09507	1.02078	1.05984	1.03594	1.03334	0.963545	1.03932	1.182	1.05168	1.2336	1.12621	1.11379	1.15568	1.12772	1.17651	1.09753	1.02848	1.03239	1.00945	0.95022	1.14325	1.17733	1.25335	1.20732	1.09913	1.14824	1.00778	1.05647	1.1101	1.12391	1.03353	1.41073	1.08418	1.03601	0.991929	0.982432	0.973115	0.963972	0.955	0.946194	0.996912	1.06467	1.07843	1.08344
						1.41773	1.37493	1.40403	1.4153	1.42212	1.42902	1.42376	1.47056	1.45959	1.47641	1.49363	1.51125	1.52929	1.54777	1.5667	1.62241	1.61029	1.59835	1.58658	1.6074	1.62877	1.65071	1.6971	1.74616	1.79816	1.63772	1.48912	1.58207	1.68739	1.582	1.489	1.44444	1.37953	1.29535	1.29042	1.37426	1.39794	1.31517	1.25949	1.25063	1.26526	1.25667	1.20814	1.20785
									0.989062	1.01304	1.03842	1.0533	1.05612	1.08289	1.06553	1.08329	1.09412	1.10426	1.08954	1.08786	1.09205	1.09634	1.08472	1.11777	1.14742	1.11105	1.12555	1.14042	1.11594	1.05586	1.07096	1.06699	1.07255	1.07845	1.04191	1.04758	1.04621	1.05785	1.01064	0.991064	0.972229	0.98844	0.971436	0.97177	0.954185	0.955217	0.988729	0.972468	0.975338
																																										1.23983	1.27892	1.29289	1.30717	1.3346	1.26863	1.18472	1.32022
																		0.645899	0.614708	0.622946	0.632258	0.655411	0.698686	0.702097	0.729432	0.722594	0.698146	0.711826	0.709966	0.701951	0.700634	0.706022	0.711493	0.720618	0.724809	0.745134	0.76013	0.796229	0.731122	0.822626	0.829208	0.8533	0.833309	0.845659	0.861808	0.847171	0.871407	0.89707	0.85296
																								2.06105	1.8507	1.78808	1.67562	1.38728	1.24769	1.13363	1.12475	1.11442	1.16583	1.15714	1.1608	1.15098	1.15791	1.13741	1.17765	1.23096	1.29812	1.2559	1.27852	1.31954	1.33603	1.27677	1.18757	1.11293	1.11557
																													1.37651	1.10825	1.11111	0.984282	0.952236	0.922211	0.80307	0.800812	0.742979	0.666865	0.748837	0.772175	0.813023	0.883136	0.823413	0.774433	0.730953	0.67483	0.625064	0.639492	0.654602
																																			1.14249	1.26782	1.1194	1.15565	1.13938	1.11706	1.0956	1.09141	1.15374	1.07437	1.06637	1.10262	1.01626	1.05188	1.07684
																																			1.20665	1.47034	1.50098	1.28091	1.345	1.41585	1.49457	1.23487	1.30113	1.27337	1.24677	1.22039	1.1951	1.18695	1.16786
2nd Tx dose: 1ng INS
0.757422	0.748038	0.711889	0.698458	0.69024	0.694821	0.718661	0.699685	0.709819	0.716959	0.712063	0.691506	0.729122	0.750876	0.769616	0.781432	0.758926	0.759992	0.734937	0.730474	0.709478	0.728395	0.705534	0.708507	0.724491	0.727223	0.759841	0.768955	0.760471	0.758734	0.744868	0.758505	0.756355	0.730368	0.726675	0.720141	0.687852	0.693629	0.684659	0.66894	0.655028	0.675459	0.697497	0.717668	0.672252	0.664366	0.667147	0.669503	0.676904	0.666573
0.968523	0.959167	0.894224	0.950846	0.920371	0.925576	0.844479	0.839232	0.874215	0.919077	0.873479	0.817702	0.755954	0.747685	0.72537	0.722072	0.748139	0.78736	0.802823	0.819689	0.832866	0.852649	0.854367	0.861406	0.825764	0.813507	0.795134	0.794157	0.785911	0.773219	0.756854	0.739042	0.73805	0.736437	0.747182	0.758031	0.730327	0.739073	0.694735	0.703444	0.671108	0.68425	0.722601	0.74567	0.707316	0.696013	0.697926	0.700585	0.726257	0.712062
1.06422	1.04554	1.11821	1.11522	1.13762	1.17544	1.21971	1.29901	1.40784	1.4512	1.46857	1.45892	1.42437	1.40225	1.396	1.43498	1.41344	1.35319	1.33871	1.29175	1.22416	1.17255	1.13326	1.0864	1.02984	1.05238	1.06637	1.09756	1.14489	1.18676	1.29958	1.40629	1.46752	1.43078	1.51538	1.48429	1.44113	1.45588	1.40489	1.34282	1.41108	1.41619	1.3794	1.42082	1.40714	1.31219	1.21036	1.19817	1.20945	1.23708
0.885026	0.899668	0.926514	0.934648	0.94696	0.978536	1.07195	1.0829	1.06435	1.086	1.135	1.16451	1.16586	1.13471	1.07967	1.07893	1.05361	1.0603	1.05087	1.05949	1.07575	1.06643	1.0466	1.03371	1.03556	1.04225	1.08304	1.04622	1.09623	1.05419	1.07359	1.10036	1.08862	1.04125	1.07794	1.02468	1.04409	1.04331	1.02147	0.978906	1.05895	1.06754	1.03517	1.03182	1.06395	1.04413	1.06322	1.02297	1.04434	1.02062
																								5.77225	5.52775	5.30313	5.81368	5.9599	5.94482	5.76109	5.59912	5.46623	5.47221	5.54927	5.52394	5.44137	5.25006	5.21366	5.13631	5.10986	5.16149	5.28562	5.55903	5.65357	6.05744	5.86494	6.02217	5.77741	5.98531
1.65017	1.80123	2.2828	2.53411	2.08006	1.84823	2.11684	2.38222	2.3121	2.64801	2.11826	2.13411	2.1617	2.19001	2.01582	2.01711	2.0184	1.98848	1.98548	1.8424	1.73856	1.70796	1.6634	1.63098	1.71224	1.54766	1.61255	1.68093	1.76214	1.77598	1.84181	1.71815	1.77175	1.5865	1.4928	1.46144	1.45091	1.4287	1.50403	1.39515	1.29269	1.20461	1.17424	1.14137	1.12315	1.10601	1.06668	1.09737	1.09693	1.05578
1.39455	1.41329	1.35868	1.35725	1.44796	1.36565	1.22946	1.17634	1.04342	1.04587	1.06505	0.931139	0.939393	0.960618	1.00257	1.14916	1.21804	1.19121	1.07903	1.03333	0.942665	0.954698	0.921636	1.02034	0.975836	0.948569	0.947728	0.944373	0.980803	1.01333	1.01667	1.07896	1.16721	1.19046	1.33091	1.42883	1.41243	1.41517	1.47092	1.44502	1.3994	1.34522	1.38388	1.37639	1.36467	1.36466	1.37815	1.33108	1.29694	1.30913
0.836917	0.856963	0.847406	0.823132	0.806921	0.759759	0.773022	0.767289	0.785983	0.827748	0.8904	0.932348	0.962491	0.912384	1.02638	1.0324	1.03455	1.07138	1.10633	1.16348	1.16873	1.14082	1.06421	1.05156	1.04572	0.958298	0.970772	0.930074	0.870422	0.887035	0.902071	0.914228	0.959486	0.972978	0.950665	0.987435	1.08579	0.993723	1.05691	1.0504	1.05339	1.06733	1.01612	0.993673	0.926713	0.868208	0.85603	0.866429	0.865796	0.889619
0.984705	1.00928	1.02704	1.03366	1.01101	0.994698	0.939337	0.948114	0.951881	0.955679	0.959508	0.966797	0.997414	0.986525	0.96581	0.941698	1.01983	1.04263	1.03052	1.04869	1.02504	1.0246	0.98447	1.00062	1.03289	1.03655	1.03524	1.02233	1.0606	1.0875	1.08286	1.10766	1.11953	1.1066	1.13466	1.16247	1.14436	1.11842	1.07123	1.04011	1.03534	1.03545	1.01743	1.02195	1.00454	1.00327	0.982492	0.970614	0.977789	0.981551
4.61794	5.08514	4.73221	4.64979	4.60997	4.53821	4.67691	4.82665	5.01985	5.1181	5.03715	4.87542	4.72374	4.53301	4.46332	4.55549	4.71967	4.80631	4.89618	5.01052	5.10848	5.11999	5.03536	4.69772	4.71806	4.73655	4.63091	4.51538	4.58758	4.634	4.73484	4.53535	4.3967	4.32673	3.94446	3.67547	3.56428	3.52098	3.3937	3.2588	3.24882	3.18748	3.02786	2.8843	2.87923	2.82728	2.91679	2.96601	3.01334	2.91121
1.90403	2.00627	2.23926	2.32486	2.27137	2.10775	2.1383	2.31557	2.4154	2.98753	2.88196	2.50081	2.69487	2.86621	2.7626	2.67338	2.41716	2.39934	2.38861	2.4886	2.67899	2.73055	3.44347	3.29803	2.51675	2.80259	2.84653	2.87713	2.90839	2.94033	2.74574	2.59626	2.46221	2.41347	2.48084	2.27705	2.1042	1.95575	1.82685	1.7139	1.72636	1.73749	1.74876	1.904	2.08949	2.14265	2.20501	2.14104	2.06208	1.99275
1.08723	1.20551	1.13977	1.17878	1.53086	1.64713	1.67547	1.56453	1.51924	1.52856	1.32096	1.31412	1.32741	1.2954	1.28827	1.196	1.06872	1.09683	1.05878	0.934356	0.926147	0.962682	1.00001	1.04827	1.05206	1.07318	1.10864	1.06744	1.07344	1.11261	1.08535	1.06389	1.06231	1.05893	1.10119	1.12795	1.13047	1.11641	1.13412	1.12108	1.13586	1.1498	1.14772	1.15358	1.12322	1.14051	1.1657	1.14193	1.13721	1.19521
0.988215	0.988004	0.987132	0.983801	0.948401	0.925334	0.903995	0.907875	0.905156	0.880361	0.860696	0.77621	0.814777	0.780983	0.76713	0.734756	0.747977	0.775274	0.78486	0.832147	0.874464	0.87561	0.920122	0.843663	0.85843	0.828061	0.823929	0.846202	0.869781	0.842494	0.832481	0.829194	0.829175	0.831463	0.804959	0.803332	0.749854	0.776067	0.782161	0.791098	0.812742	0.814073	0.819498	0.821493	0.814613	0.807847	0.822434	0.834025	0.808103	0.791575
1.01717	1.02715	1.07127	1.13297	1.22165	1.25285	1.28569	1.3203	1.19483	1.16144	1.14605	1.09711	1.11871	1.09091	1.15911	1.15705	1.16987	1.11745	1.0707	0.980243	0.971522	1.04992	1.09425	1.14467	1.12962	1.07973	1.08365	1.11746	1.1279	1.14167	1.132	1.13536	1.10716	1.09944	1.09252	1.06698	1.10648	1.0929	1.05102	1.04682	1.034	1.00103	0.97837	0.97695	0.998937	1.01196	1.01282	1.01367	1.00841	1.01646
1.30796	1.31583	1.31754	1.36624	1.28686	1.2149	1.32283	1.4452	1.27335	1.2872	1.30134	1.31581	1.33059	1.31489	1.29954	1.28456	1.2978	1.32396	1.33027	1.37909	1.4007	1.40507	1.31197	1.29515	1.18457	1.15058	1.26448	1.20578	1.1939	1.23925	1.27053	1.22047	1.16727	1.22495	1.18133	1.21837	1.23318	1.25886	1.24615	1.23678	1.28739	1.2862	1.25791	1.22292	1.20711	1.24377	1.23231	1.17589	1.18549	1.15658
1.57183	1.79828	2.10097	2.52618	3.16717	2.5374	2.21009	1.95758	2.27202	2.0499	1.96454	1.55491	1.71761	1.77693	1.56618	1.58099	1.60886	1.69746	1.45104	1.40716	1.62423	1.65168	1.41822	1.33741	1.32104	1.33644	1.30436	1.45231	1.13919	1.60444	1.27191	1.30234	1.32226	1.38571	1.4258	1.44031	1.56757	1.49404	1.7082	1.64069	1.66627	1.83271	1.98386	1.95274	2.08904	2.32187	2.3411	2.3097	2.42017	2.37245
0.962009	1.0923	1.17277	1.24758	1.21737	1.19876	1.22007	1.21937	1.17165	1.1945	1.20119	1.14431	1.07649	1.0397	0.976876	0.906061	0.927918	0.901215	0.895398	0.927394	0.947897	0.99834	0.995489	0.985817	1.00357	0.994353	0.985305	0.97642	0.963156	0.940718	0.933851	0.930547	0.932505	0.933794	0.925572	0.94675	0.921778	0.912885	0.925868	0.911699	0.925812	0.940369	0.910632	0.949791	0.99247	0.990451	0.945134	0.943227	0.899614	0.859855
1.4654	1.50731	1.58538	2.05779	1.80653	1.67965	1.55745	1.50238	1.41517	1.32108	1.3131	1.28822	1.27184	1.22426	1.23422	1.24533	1.25252	1.26734	1.2637	1.284	1.27044	1.26771	1.27852	1.30832	1.37795	1.41333	1.43178	1.40024	1.37338	1.39193	1.37632	1.3967	1.37166	1.35098	1.32862	1.27927	1.24607	1.21961	1.20098	1.20059	1.23893	1.31528	1.34269	1.32887	1.31085	1.2594	1.21803	1.17928	1.15439	1.10643
										14.2722	13.7163	16.2426	19.9094	25.7145	36.2983	37.0921	35.0514	34.2261	34.0776	32.8478	28.4625	15.0979	17.2531	17.4462	18.6287	17.7055	22.0964	22.7517	23.447	22.0845	23.5155	21.6922	22.1041	22.6392	21.4538	23.26	23.2664	23.0042	23.1228	22.235	24.075	27.4969	25.9282	26.9431	26.0856	23.6595	24.1365	24.0794	24.8909
	1.04336	1.0569	1.00587	1.19208	1.12176	1.1189	1.03992	1.05781	1.17077	1.21805	1.40664	1.52581	1.5434	1.4787	1.44878	1.37748	1.33297	1.23889	1.16945	1.10018	1.12342	1.13994	1.1075	1.08301	1.04869	1.00816	1.00214	0.913638	0.898359	0.890231	0.864412	0.874967	0.874073	0.933156	0.923396	0.913838	0.958589	1.00795	1.06267	0.982004	1.04056	1.04311	1.04566	1.1101	1.112	1.12603	1.14041	1.12596	1.14488
0.952805	1.0093	1.16548	1.2042	1.24558	1.18441	1.26089	1.23936	1.21856	1.15274	1.11444	1.10432	1.09438	1.09894	1.13361	1.17054	1.20996	1.21688	1.31591	1.34187	1.44674	1.40772	1.36138	1.29143	1.22832	1.17108	1.12003	1.14477	1.24563	1.39524	1.47641	1.40368	1.35795	1.39248	1.46626	1.49131	1.49462	1.36125	1.23813	1.31427	1.34489	1.33856	1.16428	1.03016	1.02541	1.0207	1.04831	1.01581	1.05081	1.04782
0.72175	0.734445	0.735902	0.720496	0.714071	0.722847	0.729133	0.724364	0.758803	0.861541	0.860903	0.860267	0.859631	0.858997	0.858363	0.85773	0.857099	0.856468	0.855838	0.812064	0.772549	0.852944	1.00305	0.964179	0.928204	0.935401	0.94271	0.950134	0.941684	0.933383	0.962915	0.873958	0.912363	0.937061	0.93882	0.962172	0.986716	0.977177	0.992698	1.00872	1.02527	1.04236	1.12574	1.18341	1.16098	1.21561	1.27565	1.34191	1.17733	1.31074
1.02412	1.10255	1.1607	1.23671	1.26149	1.28728	1.31415	1.34217	1.3714	1.387	1.35497	1.34526	1.3009	1.26707	1.48953	1.53165	1.5188	1.45853	1.50958	1.41779	1.47242	1.46921	1.50234	1.44174	1.30938	1.10645	1.31514	1.2479	1.41596	1.3773	1.30354	1.32142	1.36557	1.4576	1.32494	1.29932	1.32841	1.30831	1.28882	1.47649	1.39044	1.4162	1.50049	1.47253	1.44559	1.54771	1.53318	1.55556	1.48123	1.53491
	4.54664	3.84525	3.94112	4.04188	4.14794	4.25971	4.37767	3.6535	3.52157	3.39884	3.28438	3.42503	3.57826	3.74585	3.92991	4.13299	4.3582	4.60937	4.89127	5.20988	5.19869	5.29345	5.39172	5.49371	5.59964	5.70973	5.82423	5.94343	6.0676	6.52917	5.39694	6.21316	8.1184	8.70897	7.87211	6.92725	9.01087	7.87296	9.64149	10.757	10.0584	7.46114	4.51633	5.71996	7.67971	7.56019	6.67022	6.9074	7.16206
1.06846	1.03128	1.03346	1.13079	1.11651	1.0805	1.11791	1.10685	1.14698	1.10833	1.10301	1.02016	1.02398	1.03171	1.00953	1.06508	1.05363	1.06542	1.01747	0.983148	0.987796	0.995336	1.00251	0.994303	1.00563	0.992692	1.00555	0.989346	0.967044	0.969825	0.96054	0.953971	0.942799	0.95533	0.968652	0.975861	0.987593	0.972911	0.989974	0.966449	0.953139	0.959861	0.960845	0.964969	0.97393	0.981205	0.978384	0.98005	0.973911	0.959911
0.923817	0.917766	0.819348	0.815238	0.785404	0.788375	0.819974	0.837224	0.87466	0.872464	0.936679	0.971822	0.956169	0.819131	0.764546	0.732965	0.727745	0.722544	0.726598	0.727495	0.866424	0.989433	0.882795	0.859568	0.837531	0.816597	0.846848	0.872193	0.769549	0.756439	0.779336	0.764521	0.767865	0.834811	0.720113	0.729977	0.763524	0.834059	0.823462	0.814379	0.842793	0.826816	0.916681	0.944524	0.978978	0.942243	0.928553	0.913982	0.848355	0.891692
0.991959	0.943601	0.95397	0.913902	0.930918	0.879587	0.875745	0.920423	0.954462	0.971836	1.02258	1.01827	0.961831	0.959981	1.01133	1.09778	1.07131	1.12792	1.18411	1.23568	1.28306	1.31189	1.33707	1.45934	1.50742	1.44719	1.53224	1.51148	1.50774	1.47276	1.49334	1.57851	1.55343	1.59067	1.68025	1.60507	1.68883	1.64747	1.58981	1.67652	1.61715	1.70409	1.5491	1.41996	1.31069	1.22427	1.26532	1.19351	1.27891	1.37747
1.4362	1.2779	1.1909	1.16575	1.13265	1.13629	1.20903	1.27055	1.13776	1.03011	1.29936	1.24762	1.03986	1.03166	1.01097	1.00843	0.965296	0.925699	1.00562	0.955851	0.994614	1.03665	0.996014	1.00982	0.95549	1.02278	1.02981	1.10234	1.09667	1.09392	1.19734	1.21218	1.20117	1.1266	1.23015	1.15815	1.09412	1.07646	1.05937	1.04281	1.07964	1.21771	1.20368	1.18996	1.22031	1.24184	1.32221	1.41371	1.36391	1.38058
0.635807	0.611291	0.544074	0.531082	0.491183	0.481653	0.472485	0.463661	0.455159	0.598526	0.873737	1.61747	0.986885	0.710061	0.716001	0.662759	0.671692	0.627142	0.559948	0.678778	0.86163	1.10698	0.988269	0.91548	0.919837	0.858099	0.829585	0.789601	0.791846	0.794103	0.792347	0.845695	0.861072	0.821577	0.828257	0.835046	0.882947	0.936677	0.997372	1.06648	1.14587	1.13321	1.05474	1.44458	1.44179	1.41103	1.22226	1.20912	1.19627	1.18369
1.3068	1.3573	1.36256	1.39521	1.43435	1.41697	1.50196	1.52254	1.51627	1.48267	1.4648	1.38826	1.53627	1.37576	1.38254	1.41721	1.43095	1.44496	1.63624	1.52553	1.44551	1.3861	1.33138	1.28082	1.23396	1.32397	1.18332	1.21671	1.18098	1.16883	1.15694	1.14528	1.13385	1.12265	1.11167	1.0643	1.0208	1.01043	1.00028	1.01437	1.00387	1.23808	1.14634	1.02067	1.03614	1.02634	1.01672	1.00728	0.998013	0.988915
	0.797179	0.799809	0.782208	0.816484	0.815034	0.774127	0.833038	0.823102	0.884591	0.903585	0.913496	0.930407	0.91586	0.924108	0.888118	0.84901	0.886333	0.874572	0.827799	0.820197	0.859473	0.806942	0.80138	0.793517	0.816155	0.820957	0.82895	0.827491	0.826038	0.877839	0.874263	0.871672	0.88924	0.88416	0.879138	0.882963	0.875947	0.882598	0.888736	0.89496	0.872085	0.920184	0.953499	0.943927	0.919657	0.866876	0.86752	0.930322	0.913258
																																									1.10406	1.45843	1.89017	2.68502	4.63346	5.44506	6.95144	8.5095	9.37312
	2.59322	2.22832	2.24585	2.21106	2.61989	2.62094	2.124	2.05672	2.27535	2.27784	2.65056	2.08953	2.43237	2.22358	2.48136	2.44356	2.1771	1.9147	1.65694	1.46035	1.81433	1.49639	1.80283	1.65875	1.93893	2.00345	2.10435	1.99018	1.88776	1.99646	2.05102	2.13113	2.13727	2.04386	2.06413	2.07225	2.09407	2.16497	2.1755	2.12119	2.10103	2.12434	2.14816	2.17253	2.13282	2.10686	2.092	2.06732	2.18424
	1.11088	1.0745	1.06853	1.05559	1.05451	1.00907	1.0354	1.04829	1.08587	1.12625	1.13777	1.08902	1.04427	1.1638	1.11541	1.10575	1.0915	1.07993	1.0731	1.07142	1.07798	1.01851	1.05622	1.05197	1.0655	1.00315	1.06634	0.999958	0.924734	0.929194	0.933697	0.938244	1.01158	1.09735	1.08157	1.06623	1.05133	1.03683	1.046	1.03868	1.04514	1.06111	1.07756	1.08586	1.09429	1.10371	1.11329	1.10839	1.10354
		0.996652	1.01703	1.01104	1.01118	1.03844	1.03497	1.05279	1.05882	1.01165	1.02746	1.01865	1.03562	1.07762	1.11726	1.14901	1.15442	1.15351	1.12944	1.11801	1.10069	1.03678	1.02359	1.02855	1.01256	1.00272	0.980959	0.954045	0.98402	0.987713	1.01092	1.00927	0.969088	0.931984	0.930472	0.913765	0.897648	0.889886	0.898742	0.893643	0.888601	0.87508	0.890999	0.890823	0.895178	0.897455	0.899743	0.902043	0.943083
			2.8748	3.37118	3.50291	3.53756	3.57291	3.60897	3.61325	2.49109	1.60214	1.18078	0.934902	0.773776	0.839139	0.85683	0.689439	0.576762	0.495741	0.467597	0.526183	0.52964	0.518061	0.59477	0.698144	0.758574	0.809535	0.784864	0.785149	0.787012	0.765415	0.598457	0.491292	0.490253	0.489219	0.488188	0.487162	0.48614	0.485123	0.48411	0.470311	0.469054	0.528557	0.60535	0.538465	0.48489	0.556262	0.65227	0.645149
				0.987166	0.990617	0.978142	1.02581	1.06325	1.08582	1.10937	1.12087	1.1521	1.25489	1.22626	1.19441	1.1064	1.05948	1.01637	1.09028	1.09484	1.10229	1.09613	1.0512	1.02946	0.990652	1.01874	1.00638	1.008	1.03046	1.03995	1.03687	1.0503	1.05983	1.07713	1.08532	1.10104	1.06791	1.07429	1.05227	1.03112	1.06439	1.05358	1.0419	1.01319	0.989207	1.0222	1.00852	1.02224	1.0305
				1.06852	1.06257	1.20657	1.28401	1.29534	1.22149	1.32749	1.20542	1.18836	1.10602	1.11539	1.08945	1.11221	1.15366	1.13722	1.03638	1.06657	0.996789	1.00445	1.01223	1.02013	0.870023	0.957116	0.988451	0.990448	1.0238	1.05949	1.03283	0.980118	0.949953	0.92159	0.94142	1.13315	0.90862	0.982827	0.928572	1.08893	0.954106	0.951621	0.949148	1.0244	0.953586	1.00649	1.05338	1.01423	1.03621
				2.14339	2.11919	1.88354	1.86442	1.86131	2.21174	2.23966	2.49842	2.47107	2.39155	2.31939	2.37239	2.21648	2.22292	2.29429	2.40525	2.39164	2.30255	2.21985	2.2048	2.18995	2.17531	2.14996	2.1252	2.101	2.07735	2.05423	2.03161	2.00949	1.98784	1.96665	1.97842	1.99033	2.00239	2.01459	2.02694	2.03945	2.05211	2.06492	2.03551	2.00692	1.97913	1.95209	1.93761	1.96545	1.96479
						1.08985	1.12147	1.12286	1.12426	1.12566	1.22274	1.19602	1.23262	1.25682	1.28198	1.30818	1.33546	1.36391	1.3936	1.33666	1.28419	1.23568	1.1907	1.18488	1.17911	1.26096	1.25526	1.27023	1.28556	1.30127	1.30023	1.32606	1.29438	1.25833	1.23037	1.20363	1.17803	1.15349	1.12995	1.10736	1.08565	1.07793	1.07032	1.06281	0.984644	0.999469	1.01475	0.981045	0.971846
							0.858099	0.911222	0.99265	1.04741	0.996248	0.949851	0.907584	0.921905	0.914683	0.991805	1.03478	1.00539	0.978934	0.975078	0.927593	0.920366	0.91325	0.906244	0.984616	0.911279	0.83018	0.877763	0.799351	0.819776	0.819653	0.794559	0.801044	0.764531	0.81792	0.736386	0.731223	0.815382	0.810654	0.805981	0.798914	0.794572	0.790277	0.786029	0.781825	0.777667	0.773552	0.769481	0.799558
							1.14201	1.11309	1.04323	0.977491	0.898006	0.825073	0.836851	0.848971	0.839504	0.812753	0.807124	0.801573	0.694827	0.696729	0.698642	0.700566	0.72938	0.756314	0.778735	0.823717	0.852043	0.882386	0.919613	0.960119	1.05313	1.05187	1.10245	1.07039	1.04122	1.02929	1.03413	1.09251	0.983187	0.946973	0.884092	0.89595	0.906657	0.917623	0.949631	0.938297	0.939521	0.964973	1.02754
									1.46443	1.65437	1.70187	1.66535	1.86058	2.10768	2.43046	2.86999	2.34462	1.98183	1.66087	1.41853	1.36154	1.30895	1.26028	1.23038	1.20186	1.29847	1.41197	1.38541	1.2216	1.35641	1.52468	1.7406	2.02777	2.4619	2.66379	2.80929	2.76124	2.30127	2.61662	2.4318	2.19896	2.27847	2.56859	2.54998	2.53524	2.52067	2.50627	2.49203	2.47002
											0.55816	0.550657	0.543354	0.536242	0.529314	0.522562	0.543423	0.566019	0.606833	0.661551	0.671463	0.733567	0.78588	0.82955	0.817158	0.955552	0.858512	0.872264	0.90178	1.04569	0.929885	0.940179	0.939524	0.92037	0.918058	0.917425	0.944255	0.947343	0.932613	0.899454	0.88142	0.84759	0.980406	0.788288	0.821092	0.851014	0.796446	0.801704	0.807032
												0.966361	0.943308	0.955696	1.01051	1.02977	1.0842	1.08411	1.08402	1.08393	1.04596	1.05696	1.03086	0.981503	0.952741	0.94353	0.945491	0.955839	0.940047	0.891421	0.872999	0.834162	0.802947	0.811692	0.796835	0.769387	0.759997	0.771486	0.770574	0.796994	0.835508	0.79846	0.830383	0.804344	0.813588	0.865084	0.833105	0.788994	0.772062
													1.31707	1.24799	1.36741	1.38998	1.45897	1.42174	1.38637	1.38004	1.3938	1.44934	1.35285	1.3783	1.43196	1.44909	1.46664	1.48462	1.50305	1.48369	1.37665	1.36659	1.35667	1.3469	1.33726	1.32776	1.3184	1.40763	1.40233	1.31016	1.1394	1.16241	1.18636	1.1545	1.17666	1.25948	1.35483	1.27559	1.20511
																	1.00575	1.02324	1.03018	1.00663	1.02717	1.01233	0.98077	1.01759	1.03463	1.08166	1.07818	1.11112	1.15068	1.17078	1.1907	1.19675	1.18446	1.17984	1.17954	1.15093	1.14014	1.06613	1.06699	1.05676	1.06953	1.10725	1.17332	1.18329	1.17716	1.17746	1.17613	1.12996	1.05937
																			1.26177	1.29169	1.36241	1.30851	1.32457	1.34104	1.31296	1.28604	1.31184	1.28849	1.26596	1.3727	1.37063	1.34898	1.3648	1.38099	1.31346	1.24756	1.26307	1.2458	1.29488	1.32411	1.39535	1.38021	1.38362	1.44999	1.40263	1.35825	1.3166	1.23117	1.21123
																						1.17288	1.17558	1.14645	1.18075	1.17741	1.13879	1.14071	1.07849	0.935434	0.898537	0.964127	1.01416	1.01658	0.949647	0.958868	0.955544	0.982667	0.990129	1.01618	0.999324	1.04959	1.04658	1.00377	0.997242	0.979465	0.997482	0.957887	0.930849
																									1.08456	1.0238	1.04213	1.06039	1.09882	1.17117	1.18561	1.27601	1.28247	1.289	1.29919	1.3213	1.34417	1.30944	1.30919	1.33358	1.36597	1.39997	1.38368	1.39384	1.35175	1.33042	1.30311	1.29286	1.32723
																												1.81291	1.86053	1.87157	1.94712	1.44668	1.89561	2.1316	1.73614	1.77821	2.24894	2.12093	2.00671	1.90416	1.7797	1.6705	1.57393	1.48792	1.41082	1.42371	1.43683	1.4502	1.46382
																																					1.13233	1.36495	1.28283	1.31852	1.2838	1.331	1.34247	1.30279	1.26849	1.23595	1.20503	1.17563	1.14762
																																									2.23415	2.01223	2.02106	2.14458	2.15735	2.15308	2.14883	2.14459	2.13971
																																											0.899453	0.922869	0.96642	0.933961	0.976808	0.961568	0.98622
																																															2.38534	2.34507	2.48369
0.735988	0.743682	0.768593	0.786247	0.769996	0.782549	0.785556	0.836032	0.831421	0.890715	0.883832	0.875216	0.83888	0.823377	0.805062	0.831651	0.829918	0.859097	0.887159	0.911849	0.915573	0.919476	0.890986	0.865231	0.822778	0.831207	0.826677	0.845558	0.87699	0.901761	0.906757	0.908931	0.933416	0.918695	0.913848	0.926946	0.926972	0.945121	0.987947	0.991236	1.0223	1.02176	1.03255	1.04066	1.02893	1.01669	1.05873	1.06002	1.07969	1.10588
1.45757	1.46883	1.47475	1.49092	1.52681	1.59627	1.55814	1.55113	1.4508	1.38823	1.32264	1.32949	1.33773	1.3574	1.38215	1.46461	1.4525	1.39394	1.43314	1.38111	1.37894	1.38103	1.40955	1.50601	1.53574	1.70173	1.71457	1.5884	1.54374	1.45757	1.48834	1.58555	1.64708	1.65247	1.65771	1.64771	1.68464	1.68436	1.67157	1.60641	1.70105	1.74249	1.66728	1.66436	1.73627	1.72635	1.75175	1.75722	1.87042	1.8907
3.12594	3.23943	3.18374	3.2814	3.48289	3.47485	3.58118	3.50714	3.45223	3.42844	3.2533	3.0782	3.20685	3.3019	3.54389	3.46898	3.48216	3.40134	3.28973	3.1845	2.79594	2.74629	2.77942	3.09653	2.98348	3.32056	3.26111	3.29877	3.33482	3.15671	3.15165	3.07075	3.04108	3.08408	2.96592	2.82476	2.83304	2.8553	2.8726	2.89788	2.98141	2.96466	2.98202	3.10972	3.18266	3.32468	3.36678	3.4695	3.42718	3.4812
1.23036	1.2687	1.29173	1.3065	1.3227	1.33751	1.36456	1.36701	1.44805	1.45098	1.4795	1.48671	1.42346	1.42823	1.3615	1.2713	1.24326	1.19713	1.10901	1.1004	1.06449	1.04939	1.02786	0.998437	1.01182	0.956487	0.890758	0.833765	0.805754	0.817621	0.809774	0.842148	0.823597	0.816233	0.835458	0.835096	0.838797	0.841419	0.809343	0.801182	0.813187	0.817458	0.824832	0.832339	0.83536	0.831034	0.805862	0.800313	0.826665	0.798623
0.878114	0.909806	0.915917	0.928122	0.912724	0.895763	0.87511	0.907836	0.903026	0.900654	0.904938	0.883745	0.877402	0.887357	0.880312	0.834576	0.81692	0.814403	0.863703	0.877962	0.851488	0.831689	0.838225	0.849516	0.8542	0.856187	0.865281	0.895718	0.922723	0.917892	0.94933	0.920431	0.933737	0.91494	0.926822	0.910386	0.89006	0.897524	0.894264	0.880733	0.879861	0.899482	0.914463	0.900126	0.924959	0.944546	0.962904	0.976066	1.00587	1.02801
0.573032	0.568004	0.567723	0.571853	0.582612	0.60064	0.623136	0.632768	0.664819	0.677097	0.683708	0.684071	0.67938	0.651224	0.623875	0.622358	0.621826	0.605759	0.617454	0.625457	0.615596	0.613663	0.63209	0.636607	0.650534	0.656075	0.713737	0.67986	0.684263	0.679738	0.691286	0.728377	0.712225	0.746768	0.752443	0.777601	0.774292	0.783722	0.798949	0.811289	0.826984	0.834775	0.838074	0.853752	0.854074	0.840734	0.872296	0.849942	0.861428	0.873689
1.0558	1.07978	1.06383	1.06127	1.06396	1.08998	1.0896	1.08229	1.09678	1.09977	1.08827	1.11022	1.11749	1.11416	1.13423	1.1435	1.1271	1.13509	1.13508	1.15991	1.17258	1.17626	1.18236	1.17343	1.14941	1.13238	1.11916	1.09565	1.08454	1.08008	1.08836	1.09396	1.11075	1.12656	1.14283	1.15231	1.1683	1.19081	1.21421	1.23015	1.25372	1.27665	1.28619	1.29024	1.30044	1.3064	1.31843	1.33533	1.33502	1.34605
0.738775	0.745926	0.759504	0.754978	0.744165	0.755084	0.730584	0.749374	0.757088	0.736896	0.747504	0.738731	0.78214	0.787457	0.75068	0.798493	0.769101	0.75163	0.767424	0.783895	0.788224	0.754331	0.750949	0.770755	0.800005	0.819998	0.839926	0.799135	0.771545	0.759216	0.745906	0.733983	0.747811	0.764014	0.782084	0.777012	0.803818	0.7974	0.801805	0.770358	0.900414	0.792177	0.834497	0.824454	0.863705	0.871355	0.828341	0.81272	0.792481	0.840374
																													0.913341	0.993994	0.970608	0.96367	0.98431	0.980207	0.875196	0.815308	0.812306	0.906977	0.931645	0.886998	0.838088	0.817761	0.845672	0.942297	0.897454	0.830143	0.720485	0.701553	0.784433
1.23225	1.24288	1.23659	1.23463	1.24864	1.29784	1.29581	1.29591	1.29662	1.29179	1.27068	1.25236	1.23912	1.21913	1.30851	1.3839	1.38426	1.41517	1.39708	1.42659	1.41408	1.35708	1.31674	1.29313	1.27746	1.27213	1.266	1.24606	1.27037	1.2461	1.26536	1.26814	1.29697	1.29317	1.31364	1.29783	1.26699	1.25702	1.25693	1.25113	1.27629	1.26728	1.29872	1.31172	1.34878	1.35721	1.36489	1.42386	1.42804	1.43951
0.620203	0.638514	0.625385	0.678273	0.644503	0.641209	0.684366	0.627466	0.634953	0.619854	0.638587	0.73677	0.790736	0.781747	0.710349	0.6509	0.628694	0.664243	0.697332	0.710784	0.739806	0.754104	0.808135	0.870507	0.959248	1.14205	1.46853	1.11109	1.13326	1.11262	1.12728	1.09135	1.06663	1.09891	1.02215	0.969109	0.96146	0.953931	1.04258	1.10404	1.08628	1.09919	1.37166	1.122	1.01299	0.98066	0.950332	0.921825	0.847041	0.932223
1.11687	1.10834	1.08816	1.08239	1.09286	1.1368	1.17506	1.17028	1.19665	1.18492	1.18028	1.17473	1.20883	1.2323	1.29734	1.32492	1.3641	1.4074	1.43645	1.43592	1.43002	1.44369	1.45652	1.44819	1.4122	1.39448	1.33655	1.32281	1.32009	1.34113	1.34898	1.3113	1.32219	1.33745	1.34692	1.33841	1.35893	1.34123	1.35395	1.34728	1.34691	1.30166	1.31586	1.29496	1.29249	1.29696	1.35244	1.33849	1.33486	1.34881
1.12713	1.10646	1.05378	1.01084	1.01547	1.02369	1.03797	1.10425	1.1444	1.19115	1.25309	1.22259	1.21524	1.20797	1.25176	1.23545	1.20941	1.21126	1.25737	1.32632	1.35451	1.3425	1.29985	1.34218	1.26291	1.18883	1.1521	1.16608	1.18172	1.10305	1.03417	1.03633	1.02187	1.03154	1.04622	1.06132	1.03639	1.09849	1.0538	0.989499	1.01914	1.02735	1.02937	1.02296	1.0081	1.04171	1.09282	1.10395	1.0983	1.00064
0.63737	0.599005	0.66603	0.711859	0.780496	0.75403	0.777707	0.874496	0.739411	0.652655	0.639812	0.638164	0.626948	0.565753	0.522541	0.505084	0.525464	0.519202	0.524452	0.556877	0.567765	0.599696	0.639279	0.666248	0.654925	0.64982	0.625615	0.65056	0.653516	0.62723	0.61921	0.592188	0.567425	0.584032	0.588442	0.596972	0.621281	0.589391	0.60296	0.616286	0.647905	0.686643	0.721146	0.717802	0.700052	0.725913	0.765831	0.761721	0.788107	0.785603
0.776561	0.758821	0.751307	0.749393	0.72649	0.698114	0.67095	0.641045	0.649071	0.718588	0.804781	0.950348	0.916335	1.11442	1.03472	1.36548	1.1347	1.21468	1.06752	0.952168	0.967916	0.922915	0.908569	0.921648	0.824884	0.98795	0.907181	0.909107	0.884771	0.887665	0.911793	0.934826	1.03334	1.0089	1.14429	1.05472	1.05166	1.0689	1.07136	1.08072	1.01826	1.03665	1.04906	1.03481	1.01282	0.992682	1.17845	1.12332	1.07313	1.26258
1.08954	1.05513	1.04752	1.036	1.02334	1.0283	1.04324	1.02156	1.05052	1.05594	1.05394	1.06279	1.08487	1.06618	1.07978	1.07776	1.07824	1.10614	0.973771	0.855393	0.787594	0.781263	0.79793	0.790407	0.787727	0.788044	0.787964	0.797159	0.791995	0.80461	0.781283	0.780596	0.784456	0.778883	0.772358	0.766661	0.755394	0.761714	0.772322	0.751952	0.741616	0.729526	0.719907	0.706903	0.703067	0.680283	0.684105	0.683526	0.693014	0.671058
1.05815	1.04052	1.01675	0.996314	0.989903	1.00027	0.971307	1.00071	0.980748	1.01616	1.03064	1.06865	1.09525	1.10665	1.13576	1.19206	1.1861	1.17263	1.19811	1.18909	1.18539	1.18748	1.18213	1.17634	1.18625	1.21738	1.24346	1.24638	1.24675	1.25471	1.23789	1.25026	1.21262	1.18022	1.19445	1.20829	1.24247	1.27801	1.29484	1.3361	1.32932	1.31297	1.32181	1.31216	1.30903	1.33917	1.33475	1.34524	1.33741	1.31708
0.940866	0.973566	0.877157	0.88485	0.935189	0.926443	0.93219	0.901584	0.921376	0.975024	1.00662	1.09664	1.10265	1.11711	1.21786	1.24953	1.24706	1.12389	1.17415	1.11055	1.15914	1.12015	1.3045	1.30177	1.1791	1.19326	1.18567	1.14533	1.12487	1.11795	1.14731	1.17826	1.16751	1.15975	1.0614	1.05574	1.00353	1.05736	1.09852	1.10609	1.15048	1.07331	1.06392	1.0043	1.03863	1.1235	1.29077	1.29841	1.19386	1.20061
0.92626	0.961078	0.959887	0.964346	0.938598	0.972972	0.974318	0.994955	0.961288	0.969379	1.0715	1.05981	1.09775	1.04755	0.997165	0.975069	0.9413	0.946787	0.909837	0.957562	0.934642	0.933281	0.94218	0.957965	0.974287	0.991175	1.01981	1.05015	1.08235	1.05936	0.98171	0.971927	0.932227	0.971135	0.957792	0.956967	1.0001	0.997531	1.00097	1.01177	0.992902	0.967373	0.966603	0.965835	1.0141	1.00319	0.993682	0.984352	0.99942	0.969288
1.05329	1.06402	1.06292	1.06658	1.10178	1.1056	1.10406	1.1076	1.11565	1.10068	1.11181	1.10236	1.0865	1.08008	1.10908	1.13889	1.1799	1.19727	1.22918	1.23385	1.25074	1.24648	1.23344	1.24415	1.26431	1.23769	1.25416	1.20776	1.21356	1.24089	1.22708	1.25588	1.26883	1.25645	1.25029	1.23184	1.23731	1.25364	1.22929	1.22032	1.21469	1.1544	1.14934	1.12585	1.09314	1.11589	1.11271	1.11219	1.0913	1.09791
1.58852	1.61077	1.58309	1.53991	1.49815	1.48446	1.49594	1.51562	1.50723	1.45143	1.38206	1.44471	1.47061	1.37091	1.22976	1.28141	1.34715	1.35616	1.27799	1.3407	1.27696	1.30413	1.30558	1.42661	1.42203	1.39084	1.30675	1.37933	1.44187	1.50257	1.45874	1.43323	1.53812	1.57352	1.45945	1.58016	1.55185	1.64368	1.7142	1.77062	1.78667	1.7724	1.67505	1.6005	1.59039	1.67797	1.9028	1.79598	1.91507	1.91969
2.82262	2.62061	2.54838	2.27619	2.12712	2.19551	2.26844	2.28939	2.31073	2.33247	2.35462	2.3772	2.40022	2.42368	2.44761	2.47202	2.3775	2.28995	2.23546	2.17823	2.22441	2.29287	2.20413	2.24185	2.20816	2.18563	2.0847	2.08585	1.77097	1.72427	1.53513	1.45702	1.4264	1.34789	1.3813	1.39059	1.39999	1.43269	1.43009	1.42924	1.4054	1.47791	1.47695	1.47355	1.43652	1.43855	1.39239	1.44535	1.49055	1.5
0.738687	0.805116	0.750711	0.75003	0.767874	0.726141	0.595607	0.504852	0.455175	0.471248	0.552613	0.667937	0.617373	0.661716	0.729233	0.746541	0.777986	0.851375	0.880758	0.894206	0.928946	0.938993	0.930699	1.00355	1.00243	0.983532	0.88142	0.841825	0.817198	0.827378	0.848771	0.83412	0.840818	0.841121	0.827483	0.834335	0.852853	0.839437	0.830653	0.832881	0.841867	0.849473	0.89732	0.886993	0.86669	0.8832	0.880487	0.873233	0.886649	0.861061
0.787236	0.776652	0.796608	0.794731	0.795523	0.783575	0.777339	0.770458	0.809088	0.779807	0.783474	0.788838	0.791263	0.82824	0.83242	0.809853	0.820271	0.820622	0.797876	0.813223	0.789228	0.808115	0.818263	0.834764	0.846115	0.836125	0.843667	0.847464	0.854928	0.860409	0.87584	0.866377	0.885349	0.901214	0.906407	0.891972	0.907611	0.905247	0.939519	0.940137	0.917325	0.889801	0.905911	0.962919	0.992462	0.986658	0.971546	0.958742	0.967833	0.957386
1.29397	1.28893	1.35555	1.39932	1.46289	1.39074	1.30972	1.26361	1.23447	1.25564	1.25245	1.2491	1.28012	1.2717	1.28496	1.29406	1.28383	1.24308	1.23615	1.25137	1.26627	1.31799	1.36669	1.37339	1.3709	1.3285	1.32708	1.33085	1.31724	1.3389	1.33921	1.35813	1.32319	1.28817	1.22204	1.16647	1.24206	1.21548	1.24648	1.31421	1.26283	1.26083	1.25884	1.31673	1.32877	1.32735	1.41198	1.41443	1.38538	1.29336
0.502029	0.525299	0.579871	0.563098	0.526713	0.532501	0.485278	0.503883	0.520913	0.540373	0.567975	0.600645	0.582696	0.583167	0.530916	0.487258	0.515541	0.482359	0.522736	0.546913	0.495482	0.497886	0.500314	0.510521	0.508536	0.506567	0.502996	0.502102	0.482016	0.481693	0.470339	0.470582	0.470826	0.47107	0.471314	0.472303	0.473296	0.474293	0.475294	0.4763	0.47731	0.478324	0.479343	0.480366	0.476388	0.523226	0.52339	0.552639	0.557012	0.560494
0.910366	0.869243	0.904752	0.843928	0.854587	0.840475	0.806395	0.828486	0.907748	0.917489	0.927441	0.937611	0.89905	0.844061	0.859985	0.956119	1.04724	1.06606	1.10487	1.07235	1.0326	0.995693	0.963096	0.956949	0.95088	0.944887	0.890593	0.938515	0.991887	0.858098	0.830627	0.845946	0.861841	0.893347	0.892737	0.806717	0.840464	0.869478	0.902732	0.896307	0.885085	0.948522	0.912411	0.904476	0.924031	1.00519	1.05906	1.12316	1.19552	1.15615
1.18332	1.26135	1.17941	1.20182	1.2294	1.25827	1.39838	1.5736	1.50061	1.43409	1.37321	1.36652	1.18598	1.21458	1.13459	1.10788	1.12389	1.1281	1.13234	1.13662	1.11768	1.09937	1.1316	1.16578	1.20209	1.24073	1.27979	1.17132	1.19595	1.18243	1.18121	1.20568	1.19649	1.18923	1.18207	1.1432	1.15824	1.17778	1.18089	1.18941	1.20896	1.20715	1.2262	1.23381	1.24869	1.22188	1.18766	1.16604	1.20209	1.18918
0.851069	0.830372	0.909389	0.898314	0.913482	0.875283	0.819032	0.836754	0.832806	0.833322	0.875701	0.903007	1.06402	1.14117	1.14457	1.10384	1.06934	1.0484	1.05466	1.0851	1.10939	1.14524	1.18733	1.23262	1.28151	1.31177	1.26079	1.30043	1.31225	1.32428	1.30383	1.28901	1.32273	1.25382	1.24928	1.25551	1.2618	1.28263	1.30416	1.32643	1.26946	1.21718	1.16904	1.12456	1.10737	1.14164	1.2175	1.34213	1.49519	1.55973
																											1.43158	1.42197	1.41248	1.40312	1.38619	1.37897	1.37181	1.41046	1.33559	1.35921	1.34785	1.32548	1.29902	1.3589	1.3352	1.38985	1.43606	1.4429	1.4546	1.46878	1.48323	1.40886	1.48521
1.14494	1.18395	1.19682	1.13934	1.13053	1.36272	1.06536	1.05219	1.06203	1.16398	1.03753	1.1402	1.26544	1.19136	1.20358	1.03345	1.07293	1.16401	1.15546	1.10276	1.04078	1.06574	1.063	1.06027	1.05756	1.05485	1.05217	1.03629	1.0536	1.0715	1.09448	1.31518	1.40701	1.1184	1.1676	1.147	1.12711	1.12708	1.2913	1.07144	1.08928	1.0669	1.08326	1.06884	1.05479	1.04111	1.01148	1.03096	0.981633	0.936814
0.714453	0.705201	0.685696	0.656599	0.638149	0.641175	0.651407	0.668657	0.660462	0.712322	0.724598	0.757303	0.767344	0.77594	0.778238	0.772785	0.777702	0.748921	0.742466	0.721282	0.69182	0.669057	0.634865	0.60052	0.584187	0.58648	0.5824	0.598406	0.613078	0.623846	0.645864	0.647105	0.67671	0.686458	0.688576	0.726564	0.727936	0.722664	0.714928	0.709281	0.713954	0.71107	0.71169	0.711736	0.717672	0.733097	0.721832	0.747578	0.744375	0.741159
1.03893	1.04684	1.2871	1.11507	1.15922	1.18651	1.27212	1.26371	1.28779	1.27378	1.27179	1.26687	1.26985	1.21034	1.09847	1.10781	1.11732	1.10456	1.19929	1.20436	1.19693	1.1896	1.18324	1.18538	1.13926	1.16748	1.14105	1.08101	1.09585	1.14235	1.26461	1.29245	1.30136	1.30618	1.24518	1.21598	1.20963	1.19067	1.2268	1.21129	1.08895	1.09871	1.05525	1.00842	1.0004	0.987301	0.939395	0.92388	0.920466	0.873061
			1.68964	1.95473	1.967	1.8423	1.69694	1.64204	1.59058	1.54225	1.68234	1.73849	1.79852	1.62762	1.59771	1.56874	1.35567	1.34441	1.38366	1.42526	1.45631	1.45027	1.44428	1.34715	1.41227	1.3897	1.3901	1.3905	1.3909	1.3432	1.39805	1.32267	1.32329	1.30226	1.28189	1.29758	1.2916	1.30375	1.31613	1.34158	1.32631	1.37018	1.37572	1.3813	1.38693	1.40687	1.39242	1.37826	1.42804
	0.473742	0.470498	0.47207	0.473652	0.475244	0.487699	0.500824	0.54468	0.533608	0.529972	0.529941	0.52991	0.52988	0.529849	0.552418	0.52551	0.558607	0.573331	0.586153	0.614525	0.640019	0.587759	0.6713	0.681275	0.713306	0.752065	0.795278	0.804172	0.811997	0.829839	0.821063	0.815004	0.841096	0.826313	0.81204	0.766814	0.777801	0.771659	0.782206	0.776104	0.758337	0.771168	0.784441	0.75468	0.756716	0.758763	0.781759	0.767707	0.786336
																										1.25041	1.29067	1.26572	1.21801	1.25573	1.24608	1.26491	1.27537	1.27746	1.26631	1.25536	1.2446	1.19359	1.13445	1.13031	1.12619	1.13694	1.13003	1.152	1.24018	1.27677	1.30829	1.34141	1.3592
0.999353	0.970576	0.965481	0.916461	0.888871	0.862905	0.847167	0.841873	0.82986	0.817597	0.812536	0.828489	0.776207	0.806942	0.840212	0.811877	0.785391	0.760579	0.737286	0.825623	0.685927	0.586663	0.655459	0.742535	0.679968	0.70166	0.775378	0.864631	0.884821	0.915602	0.964924	0.895592	0.971691	1.03878	1.14474	1.21081	1.27847	1.50274	1.34979	1.45388	1.44882	1.70224	1.60584	1.40297	1.20203	1.07266	1.05386	1.01643	1.01647	0.981268
0.887238	0.890165	0.962714	1.00605	1.06245	1.0852	1.08392	1.05828	1.0307	0.978796	0.961111	0.97158	1.00184	0.996658	0.978122	0.981275	0.99071	0.993183	0.978315	0.958432	0.963545	0.916652	0.949223	0.962432	0.961135	0.949941	1.02942	1.08355	1.10785	1.08621	1.07869	1.01659	1.02913	0.987797	0.94628	0.912765	0.958587	1.02852	1.00291	0.947193	0.941842	0.937184	0.933651	0.984492	0.97074	0.95113	0.943073	0.96676	0.95196	0.948922
0.657997	0.658001	0.706682	0.672832	0.665878	0.623228	0.613557	0.629903	0.629165	0.685876	0.758235	0.765806	0.645597	0.679634	0.650992	0.629718	0.614912	0.595681	0.59719	0.576556	0.574092	0.587389	0.587306	0.595203	0.569552	0.635762	0.661316	0.710025	0.718483	0.727145	0.736018	0.708526	0.705539	0.702577	0.76378	0.750425	0.76801	0.769571	0.765477	0.76181	0.75511	0.748528	0.750865	0.762813	0.82605	0.8233	0.765729	0.866947	0.831788	0.781869
1.00682	1.00532	0.976363	1.01797	1.0386	1.08619	1.01014	0.977155	0.974829	0.962675	0.945833	0.933627	0.918402	0.94939	0.901192	0.918691	0.915375	0.927151	0.89567	0.887988	0.879265	0.854041	0.844544	0.844223	0.806686	0.822465	0.837085	0.839821	0.783053	0.755214	0.756417	0.767053	0.757442	0.754842	0.747311	0.751289	0.729904	0.732038	0.733906	0.719747	0.753707	0.769161	0.769805	0.807135	0.819416	0.831198	0.824446	0.820578	0.796346	0.869564
0.988264	0.986985	0.964975	0.959623	0.954158	0.960095	0.976125	0.9927	1.00403	1.03059	1.01968	1.02223	0.970293	0.977111	1.00623	1.06377	1.07408	1.07576	1.07743	1.0941	1.0743	1.06629	1.06963	1.12903	1.06331	1.08697	1.11332	1.11439	1.10559	1.01211	1.11861	1.07043	1.03819	1.03052	1.00648	1.07442	0.982335	1.04742	0.95091	1.01852	0.949207	0.992317	1.01512	1.0119	1.03174	1.01793	0.969	0.988137	0.911033	0.93715
0.893454	0.878613	0.757115	0.81656	0.886134	0.799185	0.834837	0.813158	0.756721	0.917334	0.930515	0.94408	0.958047	1.11686	1.02038	1.03609	1.05229	0.970485	0.900486	0.98342	1.05348	1.02	1.03192	1.04413	1.01567	1.11845	1.24437	1.16507	1.08455	1.07961	1.08615	1.06689	1.04704	0.922657	1.01815	0.930391	1.00805	0.966032	1.00482	1.01139	0.9162	1.00907	1.00878	1.12443	1.12897	1.12702	1.12526	1.12351	1.12176	1.06772
		11.5863	11.5042	11.4232	11.1884	10.4392	9.78404	10.507	11.3453	12.329	13.4995	13.7263	13.9608	14.2034	14.4546	14.7149	13.6919	17.3305	18.4241	17.6695	17.0656	14.8205	15.1307	17.5448	18.2333	15.7627	15.5033	13.0237	18.9416	16.8691	19.6816	21.152	14.1945	13.7761	12.8889	14.5031	12.9126	16.8884	13.321	14.9806	13.642	13.5119	15.3271	14.8403	15.1249	15.5101	15.8267	16.6521	20.8355
0.909373	0.923634	0.937737	0.924308	0.911259	0.898573	1.01063	1.0786	1.03544	1.02228	1.00945	0.996167	1.05232	1.04408	1.03609	0.985389	0.977499	0.94927	0.961643	0.987855	0.982895	1.00105	1.0032	1.04847	1.03814	0.994455	1.00337	0.994285	0.98194	0.957556	0.936203	0.923346	0.907419	0.897564	0.869988	0.864644	0.860346	0.90262	0.957615	0.978879	0.956842	0.950055	1.01452	0.951016	0.936854	0.940568	1.00324	1.00022	1.00416	0.985438
0.688387	0.695585	0.764973	0.849739	0.797088	0.802262	0.796162	0.830966	0.816231	0.83124	0.774277	0.76861	0.735867	0.776653	0.787697	0.892167	0.831014	0.791599	0.759161	0.775865	0.754964	0.75314	0.761106	0.735386	0.752848	0.746114	0.750709	0.654469	0.650356	0.678814	0.678795	0.687426	0.709437	0.804399	0.722098	0.729797	0.727174	0.755802	0.756516	0.766246	0.876816	0.890708	0.881202	0.919146	0.923561	0.899828	0.899463	0.967422	0.829188	0.820779
0.885582	1.10568	1.47137	1.31833	1.0269	1.27846	1.21555	1.35808	1.53848	1.99403	2.35917	2.51891	2.52283	2.87102	2.39514	2.05459	2.56974	1.38894	0.95165	1.08002	1.24841	1.47902	1.08397	1.42754	1.29837	1.14153	0.897032	0.738795	0.728625	0.667354	0.728416	0.836702	0.952322	1.16553	1.24453	1.37034	1.42571	1.54879	1.69818	1.67694	1.96292	2.05323	2.06314	1.97023	1.75458	2.18308	2.41621	2.60751	2.07885	1.74456
3.90124	2.7981	2.09016	2.13299	2.5233	2.44828	2.38706	3.11365	3.19783	3.22407	2.24588	2.12905	1.99942	1.84529	1.7009	1.51074	1.3656	1.29255	1.2699	1.26829	1.31054	1.25408	1.21491	1.1661	1.1663	1.18217	1.20065	1.17654	1.1451	1.14252	1.10812	1.07809	1.02093	1.03567	1.17652	1.14985	1.23142	1.18135	1.18017	1.10086	1.08136	1.09341	1.0774	1.10625	1.09611	1.10786	1.06756	1.15118	1.24295	1.20284
1.56852	1.6261	1.62394	1.63255	1.63758	1.63846	1.68774	1.73831	1.76922	1.93173	1.90797	1.95549	1.95104	1.97412	2.05458	2.19241	2.0581	2.05987	2.01913	2.08802	2.0975	2.14499	2.0243	1.88093	2.01291	1.87161	1.8953	1.86704	1.82961	1.88014	1.90515	1.88801	1.8093	1.76124	1.6615	1.73455	1.71755	1.72593	1.64287	1.68434	1.59927	1.61513	1.56141	1.6595	1.50206	1.44174	1.38665	1.65144	1.49004	1.47738
																					1.33735	1.36178	1.38713	1.37722	1.36745	1.37916	1.39108	1.4032	1.41554	1.42809	1.44087	1.45388	1.46713	1.43613	1.38301	1.3845	1.386	1.38749	1.36496	1.43084	1.28678	1.29443	1.37733	1.25338	1.24969	1.35186	1.32548	1.34431	1.33841
1.02955	1.05422	1.13457	1.11709	1.09431	1.08015	1.07571	1.11623	1.12845	1.11729	1.06071	1.06486	1.07955	1.10621	1.12078	1.13614	1.15631	1.20549	1.23981	1.2263	1.26621	1.24009	1.19472	1.19304	1.17542	1.19277	1.1963	1.2352	1.28467	1.32016	1.35664	1.37603	1.40142	1.39596	1.42008	1.42819	1.4364	1.4447	1.44306	1.44889	1.43197	1.46988	1.4316	1.42571	1.41986	1.37447	1.58382	1.41954	1.43746	1.41703
0.954922	0.904267	0.878008	0.843506	0.941011	1.00554	0.976701	1.01895	0.987519	0.900853	0.852737	0.866733	0.848354	0.984927	0.988082	0.895136	0.840194	0.851448	0.96493	1.05814	1.17129	1.18508	1.16713	1.12195	1.1331	1.16361	1.13233	1.11054	1.08957	1.06938	1.05577	1.0425	1.06466	1.05795	1.08559	1.11471	1.07335	1.0696	1.06588	1.06218	1.07757	1.07094	1.05838	1.02321	1.05133	1.02906	1.02866	1.01224	1.01981	1.0081
1.39208	1.31688	1.26706	1.24018	1.28164	1.32597	1.37348	1.30103	1.25244	1.15758	1.198	1.18428	1.17086	1.18464	1.20075	1.25649	1.23799	1.19749	1.15956	1.07384	0.984852	1.0503	0.972462	1.04023	0.974467	0.994104	0.96038	0.928869	1.00224	0.965089	0.996398	1.02981	1.05934	1.04784	1.02013	1.07719	1.02252	1.08136	1.05776	1.06736	1.07713	1.08783	1.05523	1.061	1.039	1.03829	1.01594	1.02826	1.08682	1.05869
																																															2.7512	2.71015	2.73568
	1.06003	1.09426	1.08718	1.04389	1.03345	1.05427	1.05392	1.05989	1.06593	1.06585	1.08482	1.10448	1.09914	1.09385	1.11421	1.13534	1.15729	1.18112	1.18766	1.19427	1.20779	1.19058	1.19129	1.20803	1.26458	1.32668	1.34274	1.3592	1.39452	1.40709	1.45362	1.46173	1.43771	1.44459	1.42135	1.43378	1.44911	1.46478	1.48078	1.49714	1.51387	1.53098	1.4707	1.42973	1.39098	1.35427	1.32844	1.30358	1.27688
		1.24484	1.24005	1.2717	1.2973	1.24094	1.28093	1.32359	1.3465	1.38478	1.38817	1.40283	1.40248	1.46878	1.41177	1.43389	1.46215	1.39386	1.39392	1.32919	1.29569	1.35975	1.35277	1.3418	1.3466	1.33607	1.30771	1.29534	1.27416	1.21593	1.25443	1.24499	1.21816	1.1917	1.14951	1.12995	1.10126	1.07956	1.10356	1.11079	1.12208	1.12008	1.1177	1.06948	1.06781	1.10089	1.11621	1.15336	1.23716
																																			1.49986	1.21465	1.01696	0.806273	0.667904	0.639111	0.678563	0.722705	0.754601	0.756915	0.646217	0.629426	0.632493	0.607494	0.639508
			6.66919	5.27521	5.37882	5.93993	5.74541	5.04214	5.59325	5.30839	5.05114	6.18955	5.02266	4.0694	3.42026	3.02866	2.80724	2.74785	2.69092	2.74272	2.79656	2.83762	2.7434	2.74558	2.71567	2.69319	2.64007	2.64617	2.74545	2.63321	2.69977	2.67319	2.75698	2.55307	2.58626	2.60751	2.51982	2.5483	2.66814	2.64762	2.63724	2.59645	2.69416	2.73474	2.98441	2.83356	2.82675	2.77241	2.9116
			0.73063	0.643286	0.597519	0.605114	0.709386	0.857074	0.973924	0.95273	0.949077	0.945452	0.959895	0.974786	0.998055	1.02246	1.04809	1.0251	1.03585	1.04632	1.04627	1.04622	1.00861	0.973609	0.987908	0.986365	1.01662	1.02826	1.02559	1.02774	1.00643	1.01132	1.01626	1.00269	0.989481	0.964357	0.985872	0.990993	0.967276	0.960771	0.999783	0.958938	0.993674	0.996806	0.999856	0.972609	0.970299	1.0403	1.02865
				1.2547	1.2872	1.2671	1.27976	1.27468	1.35879	1.36405	1.38461	1.34017	1.32841	1.28978	1.23435	1.16002	1.13143	1.17365	1.2399	1.23253	1.20309	1.24713	1.29452	1.34565	1.30844	1.22372	1.15447	1.12276	1.1	1.08131	1.09059	1.07973	1.0677	1.07079	1.10632	1.09526	1.09178	1.0615	0.999772	0.969268	0.94428	0.917387	0.877321	0.875924	0.956452	0.848569	0.853363	0.812439	0.822826
				1.20269	1.2012	1.15771	1.10254	1.05845	1.01154	0.960417	0.928179	0.964926	1.0047	1.0479	1.12207	1.155	1.1844	1.21533	1.20353	1.19197	1.18062	1.17333	1.16526	1.17353	1.18192	1.22588	1.16605	1.20128	1.23871	1.27304	1.34272	1.42047	1.38588	1.35293	1.33276	1.25369	1.2747	1.3262	1.31688	1.3621	1.35318	1.33398	1.37638	1.40759	1.47966	1.53099	1.58601	1.60774	1.57187
						1.65217	1.74735	2.20617	2.24581	2.2869	2.34003	2.42828	2.33281	1.87937	2.374	2.27259	1.59192	1.29725	1.09464	1.19036	1.30443	1.44269	1.61372	2.35952	2.35931	2.43924	2.52478	2.45401	2.49164	2.40865	2.28208	2.42394	2.58461	2.68063	2.78406	2.58491	2.89793	2.69045	2.88621	2.86989	2.92231	3.0051	2.70757	2.77529	2.84648	2.92142	2.67875	2.7163	2.71705
							1.30887	1.338	1.29283	1.26764	1.28731	1.3076	1.3173	1.32567	1.35754	1.38487	1.41332	1.44296	1.47388	1.50614	1.57356	1.58743	1.58698	1.57849	1.56086	1.54362	1.51877	1.56373	1.59003	1.58787	1.58571	1.64744	1.68572	1.66013	1.69861	1.71834	1.73853	1.74438	1.71362	1.71978	1.70162	1.72251	1.74393	1.76587	1.78838	1.81148	1.83517	1.84855	1.86213
										0.723408	0.774099	0.704631	0.643843	0.594949	0.552957	0.516502	0.484556	0.516149	0.507744	0.502497	0.497358	0.552334	0.620974	0.709094	0.682403	0.687691	0.709039	0.649325	0.646696	0.654069	0.620057	0.589408	0.561645	0.53144	0.504318	0.49303	0.500633	0.498597	0.527293	0.559494	0.595884	0.615293	0.636009	0.658169	0.681928	0.711315	0.743349	0.778404	0.816929
																									1.67528	1.61408	1.55718	1.51732	1.48172	1.48663	1.51049	1.55925	1.61126	1.65003	1.66592	1.66829	1.68228	1.63827	1.57821	1.62542	1.62426	1.59713	1.6276	1.64672	1.71206	1.73798	1.76469	1.76578	1.73354
												1.1575	1.05485	1.02919	1.05149	1.01135	1.06635	1.04908	1.07131	1.04738	1.08459	1.06895	1.16561	1.16131	1.16388	1.16542	1.14218	1.01841	1.08905	1.12687	1.18486	1.20912	1.15801	1.21098	1.13633	1.18745	1.30899	1.32772	1.25956	1.27344	1.28774	1.27869	1.22708	1.23979	1.2691	1.28829	1.16691	1.16321	1.15953
												0.920788	0.939807	0.927342	0.924118	0.938091	0.895473	0.856559	0.864197	0.845206	0.874337	0.905548	0.93907	0.932277	0.991663	0.884581	0.959198	0.974092	0.943944	0.842334	0.981946	0.86428	0.980596	0.972574	0.955436	0.937721	0.912132	0.895497	0.86639	0.873365	0.861897	0.872278	0.824718	0.825122	0.825526	0.776776	0.760289	0.780234	0.745588
													1.22568	1.26573	1.19254	1.17166	1.16971	1.23153	1.21827	1.24025	1.28973	1.25624	1.23633	1.2568	1.32514	1.29583	1.31163	1.34696	1.35815	1.31832	1.30934	1.35045	1.334	1.34237	1.36845	1.32497	1.31101	1.37462	1.41496	1.40926	1.41048	1.41692	1.34986	1.36205	1.3572	1.34719	1.35216	1.33573	1.32067
														0.911034	0.874272	0.892634	0.821392	0.848703	0.907459	0.900035	0.910088	0.897012	0.924236	0.961931	1.00055	0.959447	0.966421	0.983463	0.988596	0.976077	0.952151	0.958566	0.975987	0.958109	0.973245	0.989698	0.984395	1.01576	1.01616	0.982622	0.989807	0.976616	0.961342	0.982223	0.974311	0.946248	0.956361	0.958815	0.940728
														0.962173	0.991886	0.943958	0.931843	0.920034	0.901671	0.917052	0.885224	0.904427	0.909687	0.849131	0.894453	0.851839	0.89645	0.945992	0.853035	0.873002	0.968625	0.881847	0.901237	0.877936	0.85581	0.894953	0.937848	0.865349	0.852986	0.866967	0.872445	0.868414	0.86442	0.860462	0.856541	0.845098	0.833957	0.823105	0.848766
															0.690147	0.802351	0.909581	0.918525	1.03731	0.947736	0.972189	0.997699	1.03981	1.03851	1.09417	1.08134	1.06765	1.08472	1.00002	1.01655	0.958805	0.934499	0.985528	1.04003	1.01583	1.04042	1.03031	1.06303	1.06367	1.0694	1.04234	1.02825	1.03205	1.02518	1.01194	0.991386	0.986531	0.971195	0.99914
																1.16373	1.02354	0.880878	0.823685	1.02466	1.00358	0.850601	0.822649	0.854083	0.919923	0.820779	0.832597	0.832995	0.863096	0.824131	0.819521	0.749072	0.761962	0.806174	0.745012	0.737166	0.76414	0.805135	0.939948	1.04524	1.04916	1.02317	1.0179	1.00147	0.968779	0.873261	0.834782	0.834174	0.74973
																					1.00185	0.955606	0.958596	1.01212	0.964049	0.988539	1.01431	0.998234	1.01052	0.944577	1.03929	1.02468	1.03977	1.06158	1.08433	0.97031	1.01748	1.04021	1.06398	1.08887	1.11495	1.1423	1.1627	1.12823	1.06163	1.00773	1.01904	1.03061	0.974571
																								1.03059	1.05228	1.07419	1.07011	1.09344	1.08046	1.0819	1.09812	1.11942	1.12367	1.14987	1.16811	1.15536	1.1495	1.16944	1.138	1.1804	1.204	1.24267	1.26574	1.31499	1.2982	1.30788	1.27058	1.28151	1.21476
																												1.09362	1.10234	1.12543	1.11937	1.20628	1.24552	1.22675	1.17804	1.23962	1.24779	1.25607	1.24393	1.24382	1.24371	1.15795	1.08976	1.06587	1.043	1.02109	1.00113	0.98194	0.988958
																																							1.10426	1.05766	0.988656	0.987915	0.987175	0.986437	0.985699	1.00323	1.0214	1.04023	1.09386
																																							0.887356	0.957847	0.963363	0.956903	1.06758	1.11984	1.12363	1.09036	1.07164	0.967268	0.980403
																																								0.762057	0.745556	0.751845	0.741041	0.732543	0.767192	0.747765	0.720199	0.694594	0.698942
																																											1.00841	0.884725	0.884182	0.877838	0.91717	0.841556	0.840766
																																												1.52545	1.58974	1.52127	1.55623	1.57803	1.54647
2nd Tx dose: 10ng INS
1.03117	0.995987	0.970772	0.95074	0.979271	0.995821	1.00327	1.00774	1.02479	1.03922	1.05688	1.08386	1.09685	1.10515	1.12258	1.16392	1.23954	1.32014	1.33842	1.32955	1.29349	1.25361	1.21333	1.22203	1.21092	1.2182	1.2118	1.23679	1.26918	1.35306	1.35667	1.36416	1.29906	1.28448	1.24309	1.20468	1.18247	1.18695	1.2073	1.22016	1.27755	1.33869	1.35163	1.36536	1.35969	1.37943	1.38528	1.38476	1.37767	1.38529
1.30503	1.26804	1.25489	1.25249	1.23918	1.24633	1.19753	1.21469	1.19667	1.20787	1.24978	1.2476	1.22051	1.15598	1.19349	1.28297	1.27364	1.21398	1.21751	1.19857	1.22255	1.27463	1.24552	1.25282	1.2925	1.3172	1.47049	1.45156	1.50451	1.4648	1.47592	1.48679	1.50345	1.48216	1.55493	1.57958	1.56663	1.58823	1.60051	1.58716	1.58531	1.5835	1.56712	1.5716	1.59063	1.61003	1.62519	1.71318	1.72191	1.78604
												1.05118	1.12718	1.07566	1.13788	1.16578	1.22904	1.23184	1.21616	1.16256	1.13032	1.07571	1.03582	1.00236	1.00346	0.923177	0.942573	1.00675	1.05666	1.06968	1.00944	1.03789	1.04074	1.07431	1.10367	1.17988	1.27686	1.31898	1.29818	1.31668	1.26368	1.28145	1.30798	1.33835	1.34997	1.39261	1.32749	1.36191	1.31904
1.05813	0.986695	0.997927	0.989554	1.0314	1.01977	0.978727	0.984097	0.948589	0.928963	0.917258	0.920429	0.905461	0.905363	0.926995	0.935826	0.955806	0.942067	0.936208	0.936407	0.941161	0.952848	0.946062	0.967753	0.967988	0.996497	0.99586	0.996855	0.978656	0.961802	0.956545	0.965368	0.949147	0.944622	0.946913	0.942682	0.943425	0.944584	0.960662	0.948321	0.941916	0.971988	0.975182	0.979275	0.981234	0.982199	0.978289	0.976699	0.980624	1.01336
0.643702	0.656076	0.691912	0.724565	0.714627	0.693567	0.721884	0.72527	0.728688	0.714825	0.715107	0.754378	0.774509	0.811762	0.779618	0.785569	0.791247	0.83422	0.84296	0.878862	0.898698	0.904024	0.911537	0.910343	0.91107	0.914956	0.929061	0.916591	0.928099	0.92973	0.905277	0.927037	0.843731	0.866403	0.888194	0.888255	0.890761	0.897199	0.868919	0.881621	0.880317	0.913182	0.898046	0.924857	0.925993	0.914116	0.943339	0.927919	0.900679	0.889994
0.955512	1.02126	1.17294	1.21013	1.21471	1.27621	1.27037	1.35267	1.31806	1.28137	1.4195	1.40528	1.31656	1.32518	1.32267	1.24498	1.33398	1.27275	1.3716	1.39141	1.39319	1.40984	1.3403	1.33892	1.3123	1.30594	1.25857	1.23196	1.2449	1.25734	1.28865	1.28326	1.29426	1.33004	1.3242	1.30686	1.26365	1.242	1.21837	1.27588	1.27695	1.28026	1.22827	1.20411	1.21282	1.23593	1.21023	1.24562	1.17253	1.16411
1.76602	1.83686	1.91691	1.94071	1.99307	2.07722	2.06414	2.01641	2.03881	1.8966	1.83876	1.81408	1.80456	1.84155	1.915	1.95753	1.86258	1.71239	1.61689	1.51445	1.42516	1.35699	1.3499	1.38749	1.4323	1.51318	1.64406	1.55654	1.50285	1.45273	1.44205	1.3326	1.28761	1.25236	1.21249	1.43135	1.30711	1.20484	1.30417	1.43607	1.43392	1.61262	1.54536	2.2522	2.3043	2.6851	2.7429	2.88141	2.82343	2.86923
0.933718	0.933945	0.900544	0.883975	0.876203	0.842341	0.819608	0.81303	0.767214	0.744541	0.74134	0.740469	0.698315	0.706106	0.783148	0.767827	0.740549	0.723401	0.780575	0.828195	0.887837	0.892411	0.946197	1.03377	1.02466	1.04793	1.05593	0.973839	0.930002	0.889943	0.900058	0.847163	0.8226	0.86194	0.866087	0.880456	0.897599	0.918434	0.892934	0.917576	0.931016	0.943828	0.962401	0.981719	0.983846	0.985982	0.970895	0.983011	0.963467	0.974671
0.574644	0.546302	0.564715	0.550021	0.53673	0.501725	0.506671	0.510071	0.53455	0.561497	0.591306	0.57181	0.573322	0.520194	0.484303	0.466739	0.515175	0.574827	0.580096	0.585463	0.59093	0.567905	0.575226	0.618667	0.665483	0.677527	0.690015	0.698946	0.745825	0.722658	0.818364	0.943289	0.894207	0.965685	0.939105	0.897246	0.83477	0.792658	0.805125	0.78767	0.75113	0.747277	0.795584	0.847061	0.833602	0.833405	0.849903	0.779081	0.856213	0.839465
1.21028	1.22776	1.25471	1.28387	1.29436	1.30503	1.30592	1.2754	1.23093	1.22887	1.1988	1.19388	1.17914	1.14688	1.1979	1.24686	1.28	1.28544	1.31689	1.29745	1.23115	1.22659	1.22206	1.27473	1.32075	1.30463	1.40851	1.36355	1.29284	1.29946	1.30614	1.28953	1.34136	1.35885	1.45369	1.47725	1.50986	1.51532	1.53615	1.60653	1.53038	1.57155	1.59919	1.65997	1.64722	1.66948	1.64757	1.73625	1.68489	1.66791
1.17671	1.11023	1.13381	1.0891	1.11342	1.11631	1.05151	1.06678	1.10121	1.05953	1.08231	1.0799	1.12364	1.09579	1.04226	0.994426	1.01147	1.05659	1.08941	1.12372	1.08263	1.13494	1.02566	1.10497	1.08757	1.01072	0.943938	0.991097	0.865938	0.89616	0.934347	0.896342	0.861307	0.906563	0.819219	0.747226	0.833143	0.755673	0.792255	0.821757	0.793224	0.856996	0.850868	0.798531	0.836185	0.853842	0.815119	0.822284	0.86763	0.845102
0.956272	0.979781	0.976292	0.973157	0.949414	0.988293	0.980846	0.958478	0.919044	0.912815	0.906669	0.942833	0.931324	0.930474	0.929626	0.956834	0.98886	1.03225	1.05369	1.07096	1.04509	1.04971	1.02701	1.02416	1.01442	1.00486	1.00042	1.02121	1.03542	1.05681	1.07044	1.08125	1.09899	1.1094	1.11385	1.11276	1.10453	1.1018	1.08917	1.09294	1.09809	1.1033	1.12045	1.12947	1.12969	1.13578	1.13552	1.12606	1.11469	1.11152
0.836819	0.807214	0.825259	0.814671	0.820903	0.859127	0.869469	0.85484	0.877661	0.841999	0.833166	0.860441	0.879035	0.888173	0.897503	0.908709	0.87512	0.885818	0.910575	0.908857	0.866886	0.876558	0.860614	0.822152	0.838586	0.85569	0.873506	0.871214	0.868934	0.877486	0.864049	0.880958	0.894128	0.899714	0.899276	0.906702	0.927058	0.921711	0.900821	0.865211	0.873101	0.862773	0.859377	0.856007	0.852664	0.865354	0.878427	0.897265	0.88235	0.893805
1.78686	2.3753	2.36684	2.39445	1.83187	1.48335	1.19651	1.06174	0.967281	0.953594	0.913243	0.876169	0.779975	0.819519	0.863287	0.925654	0.997735	0.924313	0.895106	0.870049	0.844914	0.821191	0.818514	0.788606	0.772696	0.776648	0.768473	0.767843	0.747977	0.750762	0.749919	0.760332	0.750485	0.737717	0.726514	0.705792	0.689954	0.677562	0.691461	0.711491	0.73934	0.791391	0.894756	0.959117	0.986145	0.986819	1.04766	1.09365	1.14746	1.16074
1.37679	1.32537	1.30708	1.3237	1.27002	1.25969	1.29835	1.28097	1.27193	1.24311	1.12682	1.11176	1.18176	1.19155	0.847285	0.657361	0.570428	0.564313	0.623752	0.718986	0.848541	0.810537	0.857101	0.8507	0.88431	0.947824	0.909619	0.99285	0.952239	0.901139	0.8711	0.878787	0.890047	0.934968	0.928478	0.898811	0.92581	0.896883	1.03957	1.08509	1.16952	1.23312	1.24581	1.14645	1.09293	0.986792	1.12857	1.14381	1.16471	1.27777
14.0692	13.2464	13.151	10.6048	10.3745	10.154	9.94261	9.56968	9.51628	9.46348	9.41126	9.72004	10.0498	10.0445	10.0392	9.35695	8.76155	10.2736	8.32932	8.85364	9.03112	10.2264	10.1208	9.2499	9.28829	9.00896	8.43582	8.16071	8.13924	8.06148	7.92999	7.04333	7.04843	7.18566	6.65636	6.19968	6.14946	6.06634	5.49433	5.97333	5.92516	5.60973	6.02691	5.33978	5.34949	5.08157	5.37828	5.76079	4.90896	5.00017
																			7.6115	6.30504	8.17797	7.49062	7.30968	7.29684	6.53736	6.45192	4.70036	3.82614	4.247	3.88786	4.5381	4.65	4.84859	5.0649	5.25874	5.46802	4.88596	5.11812	4.74187	5.4457	4.4599	4.20052	3.96965	3.85719	3.4536	5.01456	4.49796	4.32217	3.60058
																												7.02732	7.38799	7.68535	8.07804	8.51303	7.77553	7.83979	8.55132	8.53158	8.82835	8.91218	9.29755	9.20997	9.42957	10.7084	10.3659	12.0783	11.047	10.9293	11.0142	10.5992	10.4173
1.00022	1.03683	1.06427	1.05241	1.06914	1.05014	1.14567	1.13156	1.06295	1.01002	0.96211	0.968444	0.966039	0.978748	1.02083	1.04217	1.06443	1.08766	1.07503	1.0627	1.05064	1.07815	1.14786	1.09711	1.08853	1.09925	1.13905	1.18184	1.14659	1.25896	1.34201	1.43678	1.54089	1.5552	1.6287	1.58356	1.54085	1.51508	1.50254	1.55617	1.43309	1.56484	1.5535	1.71654	1.66414	1.61484	1.56838	1.85784	1.8548	1.67738
1.23634	1.27235	1.29047	1.33568	1.35108	1.3874	1.38555	1.42062	1.42689	1.41328	1.41734	1.41137	1.43758	1.43676	1.46492	1.49218	1.52347	1.53222	1.54108	1.5373	1.4915	1.46031	1.45767	1.40776	1.36402	1.32291	1.33336	1.35832	1.38422	1.41113	1.41296	1.4191	1.41648	1.41387	1.38232	1.38989	1.40807	1.42673	1.34916	1.27959	1.22273	1.20371	1.18527	1.16739	1.12469	1.15198	1.09383	1.10504	1.05258	1.02481
0.600575	0.632045	0.657704	0.650248	0.662707	0.678354	0.774646	0.834678	0.854564	0.892556	0.902726	0.895101	0.913479	0.882509	0.748369	0.797498	0.853531	0.869255	0.881299	0.889127	0.873843	0.859075	0.828892	0.838551	0.802511	0.817668	0.793185	0.738923	0.749368	0.752372	0.72175	0.74065	0.757685	0.774116	0.80664	0.810118	0.863413	0.826161	0.849442	0.842439	0.855741	0.860278	0.828335	0.834717	0.821993	0.783202	0.758148	0.745107	0.774075	0.847276
1.11242	1.05506	1.11588	1.09232	1.05411	0.965316	0.949148	0.906028	1.05915	1.18942	1.37119	1.3246	1.30772	1.29249	1.2933	1.3602	1.38759	1.4245	1.50045	1.42197	1.43887	1.47279	1.46048	1.51082	1.48343	1.47316	1.4329	1.47237	1.47591	1.47948	1.35393	1.3143	1.37311	1.33891	1.3034	1.35373	1.37346	1.36505	1.35674	1.38154	1.43286	1.41301	1.3937	1.41559	1.43819	1.54042	1.57144	1.64304	1.72147	1.67515
3.6347	4.2644	4.10277	3.9273	3.46666	4.86358	5.75384	4.27265	4.88655	5.67678	5.57314	5.49383	5.41675	5.26245	5.11669	5.47128	5.5353	5.60084	5.40313	5.2189	4.81996	4.6431	4.40788	4.14934	4.00323	3.89408	3.78417	3.89542	4.36249	4.1682	4.26872	4.4148	4.77532	5.27268	5.19743	5.1593	5.09997	6.36706	6.19299	5.99146	5.80263	5.94752	6.09982	5.73092	5.18423	5.04051	4.52005	4.27871	3.80914	3.10505
1.63099	1.69327	1.60927	1.59898	1.58881	1.51815	1.49134	1.46547	1.44048	1.41633	1.39297	1.3287	1.2701	1.21645	1.24238	1.25933	1.25508	1.25086	1.16382	1.13693	1.11126	1.08673	1.12457	1.22477	1.18401	1.17969	1.17539	1.33515	1.4718	1.31716	1.30287	1.24969	1.21618	1.18443	1.25312	1.18066	1.27133	1.33605	1.26777	1.21823	1.1986	1.21911	1.16423	1.18307	1.25801	1.22797	1.20083	1.10688	1.08815	1.02787
																																					4.59129	4.58244	4.76078	4.70428	4.67843	4.77413	4.69536	4.86468	5.02952	5.141	5.24548	5.33069	5.28416
0.90627	0.989861	0.934876	0.873463	0.843151	0.814872	0.801433	0.788431	0.795782	0.765255	0.752778	0.721891	0.705235	0.719467	0.717526	0.715594	0.713673	0.754983	0.776649	0.827747	0.85516	0.855175	0.855189	0.855601	0.845809	0.836239	0.82924	0.822357	0.830626	0.808591	0.818037	0.831138	0.844665	0.85864	0.821803	0.88086	0.811849	0.853732	0.855519	0.837344	0.862313	0.819798	0.813449	0.830867	0.817198	0.843519	0.87722	0.901255	0.898484	0.910009
2.56588	2.41564	2.44903	2.33241	2.34696	2.30639	2.3388	2.41957	2.38196	2.38356	2.48672	2.57196	2.66325	2.65069	2.54709	2.45127	2.36241	2.25186	1.96935	1.74983	1.85481	1.69506	1.53533	1.98272	1.87758	1.78303	1.75548	1.87284	2.00701	2.00356	2.00419	2.00483	2.00546	2.00609	2.16098	2.10796	2.27858	2.0503	2.67084	2.84438	2.64428	2.47049	2.31814	2.18348	2.06361	1.95622	1.85945	1.83123	1.80385	1.77728
1.07351	1.04043	1.02991	1.05991	1.06895	1.11604	1.09642	1.09598	0.987137	1.04074	1.03725	1.03377	1.02106	1.00866	1.04921	1.03649	1.02293	1.04817	1.07467	0.968045	1.02316	1.08493	1.06602	1.04683	1.02832	1.01156	0.99533	0.979616	1.04979	0.981369	1.01266	0.985544	0.996687	1.00578	1.07166	1.05765	1.01734	1.04312	1.05946	1.06662	1.02001	1.04947	1.09329	1.09563	1.08824	1.00592	1.05617	1.05365	1.05027	1.10006
1.16572	1.15964	1.17147	1.13169	1.13872	1.04839	1.08096	1.03615	1.16702	1.18369	1.20084	1.21849	1.23668	1.25541	1.22589	1.26333	1.20273	1.14767	1.09744	1.05142	1.02748	1.0046	1.01086	0.958254	1.0142	1.02652	1.03914	1.05208	1.04005	1.02828	1.08084	1.13907	1.13143	1.1239	1.11647	1.10913	1.10189	1.13088	1.09421	1.11684	1.14043	1.16503	1.19072	1.16271	1.15702	1.15138	1.1166	1.14086	1.10577	1.1801
1.03176	0.975083	0.953973	0.92268	1.10378	1.37333	1.81707	2.68446	2.78731	2.85322	3.27448	3.68116	3.8	4.17523	4.6701	5.153	5.29983	5.81826	5.34246	5.04418	4.45795	5.23297	5.47633	4.91995	4.80114	4.78958	5.11615	5.24529	5.31648	5.38964	5.33619	5.31598	4.88632	4.19221	4.02853	3.96438	3.90225	3.84203	4.24735	3.67885	4.48807	4.6863	4.90285	5.14038	5.4021	6.09771	6.13334	5.9086	6.31751	6.84328
																																			0.760862	0.784572	0.809807	0.83672	0.865483	0.896293	0.929379	0.965	1.00346	0.905026	0.824178	0.756589	0.764136	0.755762	0.74757
1.12408	1.08665	1.10168	1.09455	1.12394	1.19136	1.14788	1.17925	1.12387	1.13565	1.14769	1.04547	1.03135	1.03209	1.03268	1.03328	1.02732	1.07578	1.07477	1.03579	1.03392	1.08498	1.05114	1.06128	1.1106	1.07029	1.04979	1.01218	0.996875	0.943536	0.914886	0.909842	0.888695	0.931116	0.932236	0.980144	0.981736	1.04113	1.11222	1.09419	1.07285	0.975979	0.917262	0.867468	0.82042	0.839721	0.843072	0.903485	0.938898	0.958059
0.920245	0.915097	0.931707	0.960724	0.961045	0.952653	0.962289	0.934675	0.945017	0.907795	0.919506	1.0807	1.05865	0.946854	0.940036	0.98528	0.940899	0.900343	0.839229	0.783904	0.782051	0.76285	0.744568	0.810511	0.774903	0.865923	0.981169	0.992697	1.0045	1.01658	1.02896	1.03338	0.984203	0.939496	0.949254	0.91551	0.942121	0.99881	1.05476	0.96325	0.948446	0.927992	0.907065	0.912504	0.893304	0.929363	0.981078	0.994519	1.00833	1.04548
1.25952	1.22874	1.18064	1.25407	1.26167	1.19143	1.17559	1.20429	1.20717	1.21218	1.22786	1.21935	1.21095	1.18418	1.1907	1.19729	1.20395	1.19111	1.17853	1.16622	1.15416	1.14059	1.12375	1.14247	1.14645	1.15327	1.21572	1.2	1.21544	1.2192	1.22297	1.35308	1.33876	1.31602	1.28887	1.30187	1.46118	1.33102	1.25229	1.33782	1.263	1.43834	1.5837	1.50009	1.3998	1.41892	1.4319	1.43678	1.33464	1.32951
0.648662	0.68004	0.670381	0.678588	0.72472	0.776324	0.775539	0.860454	0.770192	0.890977	0.838526	0.884282	0.971031	1.01325	1.03781	1.05858	1.07595	1.09391	1.11247	1.13168	1.15156	1.17216	1.1935	1.21564	1.21963	1.24451	1.27042	1.25579	1.2415	1.22753	1.04897	1.06707	1.06468	1.07694	1.11572	1.16034	1.15181	1.10002	1.0783	1.07193	1.10562	1.09583	1.0862	1.07674	1.03537	1.0638	1.09382	1.09317	1.09252	1.11055
1.00609	1.0299	1.08322	1.08843	1.03363	1.053	1.1206	1.17468	1.23517	1.36135	1.21118	1.19434	1.24953	1.29612	1.19382	1.41582	1.35701	1.1235	1.15912	1.0367	0.851643	0.811831	0.810207	0.845442	0.886601	0.891898	0.984487	0.834931	0.752529	0.722081	0.846414	0.790088	0.787814	0.76308	0.771765	0.853931	0.741402	0.782302	0.837831	0.84021	0.844534	0.826724	0.813479	0.833632	0.863304	0.906001	0.896082	0.886378	0.884711	0.91118
4.12708	3.74053	3.05156	3.03265	2.97259	3.22509	3.11729	2.96822	2.71078	3.16824	2.44403	2.5081	2.59312	2.61163	2.61995	2.54289	2.4468	2.18197	2.07564	2.5638	2.48184	2.43599	2.38574	2.33751	2.2912	1.96969	1.54112	1.26572	1.2136	1.08292	1.05975	0.905558	0.958644	0.974705	0.991313	1.04155	1.09715	1.06196	1.04291	1.12115	1.13127	1.15268	1.16127	1.12399	1.15839	1.16653	1.19255	1.15876	1.08989	1.02874
0.761589	0.779099	0.81023	0.804987	0.846118	0.902633	1.00987	1.1689	0.900041	0.731736	0.780172	0.835473	0.899214	0.973483	1.06112	1.16611	1.29415	1.45377	1.56588	1.72173	1.69448	1.61571	1.56775	1.499	1.43603	1.36466	1.28726	1.22197	1.16298	1.1293	1.09751	1.05735	1.05503	1.05647	1.05791	1.06236	1.06685	1.07137	1.1042	1.13911	1.13573	1.04505	1.08962	1.08498	1.03355	1.01861	1.01176	0.994009	1.0491	1.04999
1.1338	1.10303	1.09104	1.10757	1.09838	1.12387	1.21071	1.22243	1.27044	1.27848	1.33652	1.3135	1.31079	1.30809	1.3054	1.28285	1.29237	1.30204	1.31185	1.32181	1.33193	1.34219	1.35262	1.43429	1.369	1.33234	1.4084	1.38718	1.34705	1.35411	1.31152	1.35264	1.29268	1.26999	1.20865	1.17337	1.1402	1.02173	1.06056	1.12292	1.13355	1.14438	1.13389	1.12058	1.10757	1.09486	1.08243	1.04018	0.983727	0.961651
	1.17259	1.13809	1.23728	1.20781	1.20003	1.2326	1.21224	1.21288	1.19813	1.22281	1.22774	1.2846	1.32189	1.33719	1.35144	1.36779	1.3351	1.37978	1.38011	1.33977	1.28765	1.23657	1.15874	1.18718	1.19128	1.15028	1.13437	1.15968	1.21387	1.215	1.22334	1.22644	1.25098	1.3874	1.38941	1.35789	1.28762	1.19516	1.156	1.1672	1.27376	1.26745	1.3597	1.33127	1.35203	1.37016	1.42638	1.41763	1.39585
	2.66493	2.79186	2.57795	3.19094	3.21834	3.24621	3.12562	3.09108	2.96692	2.86261	2.7654	2.81233	3.09451	2.96841	2.93112	3.15223	3.20846	3.30579	3.16486	3.10358	3.06096	2.89801	2.6532	2.78066	2.64494	2.72641	2.42684	2.38101	2.33688	2.7733	2.57246	2.33598	2.92235	2.95031	2.85057	2.72625	2.07863	2.72233	2.63829	2.20579	2.35539	2.49514	2.43677	2.51523	2.65984	2.54783	2.4153	2.31614	2.30886
	1.36388	1.3467	1.3225	1.2793	1.25595	1.26451	1.25828	1.26574	1.25546	1.24534	1.2669	1.30141	1.33785	1.37638	1.3501	1.3248	1.33182	1.30125	1.2713	1.24269	1.20143	1.25747	1.24436	1.23152	1.21894	1.23709	1.25076	1.24808	1.23407	1.2614	1.25108	1.27939	1.29763	1.31981	1.29869	1.27824	1.25842	1.24565	1.23314	1.24025	1.25772	1.26253	1.22376	1.19287	1.17955	1.15458	1.13056	1.10752	1.07056
														15.688	17.8047	19.5895	19.3986	17.6775	17.4708	17.0599	18.3722	12.2286	17.8214	17.9585	18.6825	19.6137	17.5388	11.1215	18.0262	16.1664	14.3431	15.3217	15.0385	14.4424	14.1603	14.0568	14.061	12.9868	12.5364	11.9455	11.8981	12.0592	12.3187	11.0213	11.0114	10.171	9.3173	8.82449	9.1396
		1.00621	0.982451	1.03675	1.04622	1.06818	1.08071	1.10182	1.04327	0.990625	0.943041	0.951619	1.02211	0.956278	1.01148	1.07344	1.23093	1.37787	1.35405	1.37077	1.45761	1.31179	1.24502	1.34605	1.40782	1.27321	1.30317	1.31874	1.30648	1.38735	1.47266	1.51292	1.52096	1.37822	1.44817	1.45071	1.35823	1.53411	1.49066	1.41327	1.31488	1.49936	1.42696	1.34082	1.37664	1.34534	1.29773	1.40786	1.36616
		0.989523	0.953759	0.891698	0.88062	0.895228	0.910329	0.950164	0.993645	1.0413	1.09375	1.15177	1.22883	1.24093	1.25327	1.36097	1.34623	1.33181	1.31769	1.33047	1.35283	1.32531	1.28433	1.26054	1.23011	1.20112	1.18376	1.20464	1.23046	1.2682	1.24215	1.18625	1.12203	1.068	1.06947	1.07095	1.11768	1.15535	1.20088	1.17934	1.14831	1.10647	1.08291	1.08582	1.10406	1.12211	1.13304	1.11657	1.0954
		1.14653	1.11015	1.05553	1.10528	1.12388	1.14311	1.16301	1.15285	1.11332	1.0547	1.01543	0.978978	1.01124	0.951566	1.03269	1.03923	1.04587	1.06099	1.04587	1.03247	1.09452	1.03667	1.01882	1.00158	1.0194	1.06141	1.08555	1.0436	1.03937	1.03517	1.031	1.05558	1.08135	1.10842	1.13687	1.11932	1.10229	1.08578	0.966797	0.966838	1.09792	1.10061	1.08088	1.06185	1.04347	1.02572	0.933345	0.856233
			1.22593	1.27793	1.28662	1.33921	1.34954	1.35401	1.34179	1.32675	1.33402	1.34154	1.33611	1.30131	1.35652	1.38046	1.38307	1.37899	1.36267	1.36434	1.32936	1.35158	1.34145	1.3499	1.33178	1.33365	1.32602	1.3132	1.30554	1.30139	1.28829	1.27932	1.29171	1.28852	1.27589	1.26308	1.26272	1.2626	1.27933	1.29453	1.29646	1.32043	1.32049	1.3141	1.30954	1.30298	1.32377	1.30822	1.29519
											3.50136	2.33157	1.74768	1.65605	2.26206	3.56755	3.50203	3.43886	3.37794	3.31914	3.26235	3.28231	3.30252	3.32298	2.25262	1.70381	2.13324	2.8521	2.75732	2.56643	1.55461	2.27799	1.49327	1.4952	2.15473	2.15736	1.66854	1.36031	1.31075	1.35354	1.33028	1.24817	1.46982	1.4295	1.49014	1.55335	1.52752	1.50661	1.56453
			1.51387	1.5419	1.48728	1.41073	1.37383	1.36562	1.34776	1.33395	1.32042	1.30743	1.27103	1.09474	1.17099	1.15376	1.18257	1.14146	1.25214	1.16187	1.19934	1.14879	1.14826	1.18211	1.09283	1.30277	1.34605	1.31801	1.35707	1.39265	1.38256	1.34842	1.24835	1.33522	1.24669	1.40508	1.32484	1.33463	1.34456	1.33502	1.55341	1.44125	1.53137	1.59607	1.60942	1.60817	1.64875	1.67746	1.70719
				1.01492	1.08821	1.05512	1.10436	1.13563	1.1488	1.14153	1.16423	1.15693	1.18253	1.21025	1.23929	1.30648	1.34995	1.36533	1.34536	1.35148	1.3312	1.31457	1.29405	1.32648	1.31117	1.32393	1.31221	1.33309	1.32485	1.33173	1.33962	1.33795	1.33471	1.33818	1.33619	1.35112	1.3488	1.34651	1.37138	1.37338	1.37171	1.37837	1.37634	1.40078	1.38719	1.40406	1.3888	1.36754	1.39094
					1.19194	1.18043	1.21624	1.25052	1.22029	1.19571	1.1721	1.15639	1.11412	1.09669	1.1134	1.19768	1.23241	1.25063	1.24017	1.19654	1.20569	1.18868	1.17215	1.19436	1.21544	1.22226	1.16637	1.12178	1.11208	1.09696	1.12491	1.1525	1.13254	1.13675	1.16548	1.16123	1.16752	1.12793	1.08834	1.06924	1.05162	1.03136	1.00992	1.00347	1.01718	0.994409	0.98633	1.00666	0.978841
					1.8115	1.9521	1.80326	1.8047	1.78408	1.68967	1.72245	1.69545	1.66929	1.60493	1.65798	1.68933	1.66758	1.5958	1.61547	1.6931	1.70802	1.67317	1.6668	1.66048	1.68459	1.74634	1.80914	1.7994	1.85011	1.79164	1.73675	1.66039	1.64081	1.64759	1.63321	1.67272	1.69398	1.70327	1.74246	1.76564	1.75694	1.71485	1.72049	1.77201	1.82007	1.8752	1.80136	1.80998	1.81761
						1.34927	1.13185	1.108	1.11784	0.965989	1.22977	1.25732	1.26472	1.31253	1.37154	1.45006	1.428	1.33568	1.32427	1.38702	1.43236	1.49703	1.45275	1.46174	1.48761	1.52795	1.58554	1.53716	1.52833	1.45676	1.42754	1.34399	1.28774	1.24869	1.17698	1.08856	1.08474	1.20217	1.2874	1.28994	1.26487	1.24085	1.26108	1.23934	1.18593	1.15419	1.11658	0.973198	0.984857
							3.38886	3.67249	3.47071	3.03431	3.15582	3.25116	3.35243	3.46022	3.36447	3.27387	3.18802	3.10656	3.02916	3.09919	3.17253	2.99255	2.92972	2.83058	2.84953	2.99341	3.00755	3.1307	3.1636	3.26038	3.22596	3.2531	3.21854	3.25424	3.16525	3.12822	3.1422	3.17396	3.18441	3.30981	3.42495	3.433	3.46181	3.43103	3.53139	3.62208	3.90869	4.08002	4.02832
								1.1668	1.11069	1.16044	1.11273	1.11013	1.12035	1.13063	1.17819	1.31108	1.39814	1.41237	1.3219	1.31035	1.24054	1.24434	1.27025	1.26777	1.31308	1.32326	1.42181	1.5606	1.43685	1.37414	1.21976	1.23932	1.27394	1.27322	1.27767	1.30441	1.37329	1.47281	1.36935	1.25857	1.19897	1.18099	1.31306	1.1823	1.19028	1.26554	1.30407	1.2388	1.33417
									0.871427	0.891	0.901994	0.913262	0.924815	0.936664	0.948402	0.940183	1.02796	1.00302	0.962324	0.927142	0.908265	0.89459	0.896634	0.88051	0.860574	0.851231	0.839754	0.805173	0.780175	0.77505	0.765073	0.755132	0.766188	0.758918	0.770319	0.778713	0.764031	0.729751	0.721891	0.718785	0.719219	0.717116	0.690268	0.705307	0.691057	0.72125	0.73434	0.77238	0.792679
											1.29165	1.25718	1.43436	1.48574	1.54095	1.2336	1.29089	1.35376	1.42307	1.49985	1.5854	1.34777	1.17209	1.27944	1.24042	1.20371	1.16911	1.14134	1.2247	1.3212	1.4342	1.45728	1.48112	1.4539	1.42767	1.40236	1.45059	1.36255	1.28915	1.22325	1.16376	1.10979	1.06438	1.40981	1.40906	1.12752	1.00171	0.901149	0.890694
																																	1.43438	1.2997	1.31945	1.30921	1.22337	1.28328	1.24428	1.26494	1.28629	1.30975	1.33408	1.35932	1.38555	1.35262	1.3544	1.35618	1.39226
																			1.2472	1.15968	1.08364	1.02006	1.00882	1.01769	1.02981	0.886375	1.02371	1.21141	1.30519	1.05088	0.97987	0.957896	0.911167	0.92552	0.88717	0.861566	0.87548	0.883408	0.846763	0.835065	0.826794	0.850977	0.90254	0.874627	0.943319	1.03764	1.03125	1.01293	1.02133
																									1.18309	1.23593	1.24344	1.15634	1.16512	1.15682	1.16831	1.20802	1.22475	1.24196	1.20421	1.19621	1.20791	1.16632	1.17805	1.186	1.19405	1.12891	1.07664	1.04779	1.02858	1.03502	1.0214	1.01147	0.9991
																										1.21639	1.26648	1.24869	1.27947	1.27607	1.29198	1.2668	1.29778	1.38659	1.44761	1.48006	1.43901	1.3694	1.36115	1.37977	1.42084	1.42106	1.41765	1.42126	1.41748	1.5295	1.49542	1.51442	1.49898
																												1.17932	1.22924	1.29596	1.30453	1.31322	1.32202	1.00093	1.15225	1.35747	1.03965	1.39285	1.4508	1.18129	0.996219	1.31492	1.27113	0.967734	1.18073	1.51396	1.29787	1.13576	1.00965
																																																	1.32798
																																									1.25729	1.27819	1.29851	1.21424	1.14023	1.07473	1.09864	1.05413	1.01894
																																											0.958293	0.972191	0.944516	0.940855	0.937224	0.93362	0.930043
1.19145	1.16183	1.15904	1.13187	1.09007	1.09468	1.12496	1.10025	1.1194	1.15069	1.21985	1.22873	1.2128	1.16614	1.1169	1.08338	1.09073	1.13151	1.12124	1.09613	1.0796	1.06356	1.04738	1.03993	1.06857	1.06584	1.0851	1.11449	1.10911	1.10379	1.15118	1.05006	1.02793	1.02565	1.02427	1.01649	0.988218	0.981232	0.97833	1.00062	1.06151	1.07842	1.01302	0.994762	0.973423	0.953426	0.921224	0.916756	0.931857	0.888879
1.18091	1.15709	1.08748	1.09233	1.06617	1.02331	1.00323	1.02179	1.01595	1.00886	0.938402	0.876694	0.852008	0.875265	0.896811	0.919444	1.03175	1.11083	1.10162	1.04819	1.01028	0.992413	1.01034	0.979891	1.02563	1.04932	1.10206	1.08216	1.15873	1.19277	1.19471	1.14615	1.09197	1.02458	1.03891	1.06404	1.05353	1.06531	1.05789	1.07098	1.08309	1.07503	1.05845	1.08521	1.07644	1.09907	1.17027	1.19284	1.16756	1.1077
0.743675	0.814194	0.864333	0.818492	0.85024	0.872464	0.87768	0.890357	0.834749	0.818989	0.847082	0.869901	0.895277	0.906242	0.964472	0.995563	1.01946	1.02886	1.0493	0.999004	0.963222	0.904918	0.869867	0.842044	0.810785	0.780337	0.775866	0.761269	0.766213	0.767911	0.75746	0.737856	0.735538	0.735777	0.721549	0.716986	0.714133	0.715333	0.706888	0.69154	0.695314	0.721685	0.70798	0.742944	0.758803	0.76822	0.754733	0.759136	0.791407	0.81404
1.3986	1.43287	1.40376	1.35446	1.31135	1.34958	1.37854	1.36768	1.4138	1.38857	1.33966	1.34331	1.30374	1.29451	1.32364	1.30232	1.28155	1.29167	1.287	1.24583	1.18763	1.16759	1.15877	1.12911	1.10379	1.06305	1.00656	0.961882	0.958062	0.954273	0.976232	0.986212	0.986258	0.989402	0.97865	0.940581	0.937811	0.968821	0.984051	0.989683	1.01723	1.00028	0.989768	1.00509	1.03475	1.04794	1.04287	1.02082	1.02316	0.987641
0.786002	0.792757	0.827505	0.857	0.854775	0.854597	0.88104	0.902518	0.934402	0.968546	1.01707	1.04308	1.09134	1.16316	1.17513	1.20928	1.25803	1.29922	1.35741	1.38076	1.38075	1.38221	1.42867	1.43724	1.43501	1.46342	1.42	1.36779	1.32	1.33425	1.29997	1.379	1.35424	1.37031	1.372	1.32288	1.28441	1.25434	1.29005	1.26501	1.25968	1.28458	1.23255	1.21202	1.23515	1.21626	1.17018	1.23297	1.30288	1.3222
0.955426	0.964662	0.980006	0.976638	0.951075	0.96755	1.02949	1.02218	1.01529	1.04413	1.03667	1.02404	0.997636	0.997732	0.94293	0.9642	0.951125	0.938401	0.950045	0.961982	0.974223	0.98678	0.999664	1.01289	1.02647	1.04042	1.05475	1.08995	0.995075	0.944399	0.959098	0.978922	1.0368	1.07876	1.12426	1.17376	1.1019	1.04516	1.08111	1.16059	1.11343	1.06806	1.12335	1.06219	1.06612	1.07066	1.06999	1.09167	1.11424	1.12399
1.19793	1.15775	1.16152	1.20252	1.15852	1.10136	1.07749	1.04111	1.05876	1.1158	1.14477	1.12794	1.15596	1.15462	1.22533	1.27043	1.29221	1.30816	1.29885	1.31629	1.26869	1.22792	1.18223	1.1557	1.12761	1.10957	1.08938	1.09754	1.12665	1.14846	1.1716	1.20477	1.21328	1.21237	1.19263	1.16442	1.0964	1.07765	1.08455	1.09153	1.09093	1.03535	1.00281	1.00973	1.00541	1.00628	1.00526	1.0243	1.01889	1.04361
0.838866	0.840346	0.822719	0.815293	0.880827	0.898063	0.918223	0.816881	0.834515	0.88411	0.875665	0.885976	0.918318	0.953111	1.04428	1.08101	1.13889	1.20331	1.24884	1.2813	1.25857	1.23393	1.20686	1.19753	1.17275	1.16779	1.16843	1.1593	1.15031	1.15484	1.15448	1.14371	1.13314	1.14533	1.14746	1.13106	1.12415	1.11732	1.11057	1.11311	1.10152	1.10006	1.10165	1.10323	1.11436	1.0966	1.12219	1.14515	1.14535	1.16536
1.06854	1.04044	1.03737	1.01888	0.980593	0.966466	0.936993	0.936268	0.910469	0.903766	0.854897	0.823579	0.817186	0.81089	0.803737	0.81658	0.802592	0.820146	0.838485	0.836246	0.834019	0.831803	0.829599	0.827407	0.825227	0.823058	0.820443	0.817845	0.794774	0.800838	0.79513	0.806438	0.818071	0.830046	0.842376	0.855078	0.950235	0.844884	0.889711	0.905749	0.89628	0.961713	0.954485	0.947365	0.927475	0.955684	0.924106	0.957215	0.974074	0.906905
						0.827121	0.817502	0.825853	0.786376	0.847457	0.806393	0.834376	0.820272	0.809759	0.820955	0.832465	0.870541	0.805648	0.773903	0.76709	0.881774	0.861241	0.883739	0.969747	0.901034	0.90013	1.03393	1.0206	1.00761	0.994953	0.982606	0.970561	0.958809	0.947337	0.973359	0.975363	0.977376	0.979397	0.906356	0.843453	0.832078	0.756107	0.820689	0.750663	0.83888	0.809909	0.725498	0.799705	0.823454
													1.62139	1.62856	1.63579	1.54882	1.53147	1.63021	1.56445	1.50379	1.51326	1.73138	1.8015	1.84561	2.01368	1.97386	2.3215	2.43037	2.59892	2.37059	2.17913	2.45698	2.50238	2.50851	2.58598	2.66839	3.30656	3.66341	3.11804	3.57396	2.6498	2.58348	2.4922	2.58423	2.49175	2.28583	2.22511	2.28146	2.15478
0.927488	0.977182	0.942835	0.942269	1.0275	1.07838	1.01557	1.02086	1.05782	1.05453	1.05126	1.05266	1.03902	1.1026	1.17446	1.1434	1.1251	1.162	1.2014	1.23095	1.05962	1.25297	1.05416	1.06331	1.08085	0.989558	1.00992	0.960469	0.934441	0.940939	0.934181	0.984609	1.00846	1.03349	1.05979	1.08747	1.04221	1.00057	1.0251	1.05087	1.07797	1.10651	1.13659	1.12959	1.12511	1.12523	1.17231	1.22351	1.29419	1.3097
1.00899	0.985447	1.02192	1.03726	1.07599	1.07804	1.1109	1.10067	1.07387	1.0809	1.10865	1.09103	1.129	1.14997	1.19409	1.18723	1.18856	1.18735	1.21818	1.17625	1.12897	1.14869	1.18249	1.22745	1.22955	1.19282	1.08291	1.05411	1.02191	1.05545	1.03701	1.03979	1.04001	1.03501	1.04474	1.02232	1.02495	1.01853	1.0411	1.02059	1.01473	0.97447	0.957426	0.972258	0.953086	0.839015	0.872694	0.909191	0.948873	0.992178
																																					2.66016	2.68804	2.71651	2.74558	2.74802	2.75046	2.7529	2.75534	2.7578	2.76025	2.76271	2.21383	1.8469
1.24085	1.26878	1.28741	1.29926	1.31134	1.37647	1.48089	1.53335	1.64437	1.61902	1.67088	1.77466	1.75081	1.54848	1.67643	1.82744	1.86264	1.92184	1.98493	2.05229	2.12439	2.20175	2.28494	2.37467	2.43318	2.50397	2.53304	2.57847	2.69073	2.61722	2.62451	2.71838	2.60713	2.50464	2.40989	1.99172	1.91914	1.85167	2.02923	1.98999	1.88108	1.77873	1.61745	1.56271	1.58805	1.75428	1.84118	1.80671	1.86965	1.76977
0.963934	0.947078	0.981687	0.985883	0.977437	1.04379	1.13678	1.21014	1.23788	1.31425	1.30278	1.28973	1.24191	1.21568	1.23988	1.30094	1.40236	1.48877	1.6555	1.64402	1.61074	1.71809	1.78755	1.80137	1.85303	1.78254	1.68536	1.66799	1.68762	1.82758	1.48877	1.55835	1.47448	1.41118	1.38314	1.29872	1.22401	1.21196	1.20014	1.27747	1.24907	1.22092	1.21688	1.18884	1.16675	1.21265	1.17851	1.16047	1.20709	1.24636
0.909136	0.890912	0.917386	0.897463	0.8325	0.79477	0.760311	0.759172	0.733469	0.719388	0.73855	0.760233	0.783227	0.769832	0.783177	0.839955	0.831492	0.931337	0.910038	0.95154	0.997008	0.947764	0.903156	0.890289	0.900273	0.915241	0.936358	0.951306	0.966739	0.991457	1.02559	1.02654	1.00043	0.984837	1.05252	1.06046	1.0839	1.08393	1.07665	1.05614	1.04804	1.07059	1.06769	1.11598	1.13825	1.06977	1.0819	1.0558	1.1247	1.08695
1.17372	1.23598	0.981978	0.965807	0.940184	0.915886	1.14589	1.21524	1.29648	1.45475	1.52027	1.44353	1.36299	1.37807	1.50527	1.75084	1.59562	1.67095	1.42004	1.61363	1.63366	1.80821	1.9236	1.1835	0.854665	0.668832	0.549378	0.621203	0.580295	0.668025	0.787004	0.72434	0.670919	0.677193	0.568345	0.489643	0.52662	0.663733	0.897377	1.38487	1.44068	1.47281	1.46245	1.37654	1.41814	1.39904	1.37752	1.18101	1.28121	1.32316
																									3.92239	3.74964	3.59146	3.44609	3.31203	3.103	3.22579	3.18335	3.142	3.17318	3.20499	3.0997	3.06968	3.04023	3.01135	2.98301	2.9552	2.9279	2.9011	2.87479	2.84895	2.91074	2.97527	2.97996	2.98466
0.766839	0.725763	0.760418	0.793768	0.796801	0.83764	0.862021	0.895194	0.901062	0.91504	0.97673	0.989882	0.975903	0.950436	0.956282	0.978749	1.06488	1.09728	1.10867	1.2056	1.15617	1.15685	1.11586	1.01998	0.898003	0.818975	0.839313	0.760042	0.757637	0.767826	0.74998	0.748262	0.822636	0.856985	0.851108	0.822772	0.849582	0.857785	0.880537	0.988918	1.00672	1.03045	1.07287	1.12821	1.14982	1.16337	1.19826	1.1563	1.13456	1.1509
1.10223	1.11198	1.05058	1.09968	1.10081	1.11259	1.10463	1.12805	1.10628	1.11662	1.11599	1.16738	1.15399	1.21905	1.25674	1.20729	1.27462	1.3172	1.29446	1.36681	1.45532	1.45657	1.46936	1.35941	1.40704	1.40355	1.47808	1.4304	1.40977	1.38972	1.34948	1.32528	1.2861	1.28919	1.30781	1.31578	1.32385	1.33202	1.34029	1.35741	1.31766	1.31117	1.30474	1.29837	1.29207	1.28582	1.27407	1.28015	1.28629	1.24529
0.931496	0.870728	0.80191	0.786807	0.798691	0.81811	0.775522	0.768941	0.801019	0.804098	0.827931	0.833457	0.814963	0.816183	0.806783	0.832999	0.829746	0.786836	0.786792	0.848524	0.817874	0.836254	0.883985	0.937495	0.865585	0.958464	0.897837	0.94542	0.900406	0.862432	0.955861	0.896837	1.03056	1.03695	1.223	1.01459	0.866864	1.07505	1.26847	1.49808	1.40164	1.3444	1.31446	1.28582	1.25154	1.21903	1.30007	1.29479	1.28954	1.28434
1.41169	1.35816	1.35984	1.29388	1.23401	1.17945	1.13911	1.09422	1.05273	1.01427	0.978527	0.945215	0.933288	0.921658	0.979036	0.928753	0.883383	0.89124	0.899239	0.907382	0.90689	0.906398	0.905907	0.906593	0.907279	0.903987	0.909155	0.91569	0.908996	0.911043	0.905972	0.918566	0.924797	0.920965	0.918637	0.922653	0.926647	0.930675	0.911481	0.930365	0.924992	0.914072	0.905196	0.898062	0.888004	0.849721	0.858082	0.846286	0.832231	0.852594
0.623377	0.635329	0.652804	0.680229	0.710059	0.742625	0.778005	0.677006	0.599217	0.552577	0.580179	0.610683	0.71461	0.861164	0.888169	0.766409	0.674008	0.781893	0.930895	0.944738	1.08355	1.17206	1.09723	1.03138	0.972983	0.920848	0.920978	1.01735	1.13624	1.2866	1.48282	1.36751	1.26884	1.7259	1.93962	1.65282	1.742	1.73917	2.29348	3.36643	3.66081	3.52322	3.3956	2.42442	2.94873	2.35665	2.9053	2.71846	2.5542	2.33582
0.765632	0.799951	0.781297	0.747606	0.770634	0.75814	0.763515	0.749091	0.761445	0.783683	0.784715	0.801237	0.815824	0.821245	0.841393	0.851424	0.893778	0.896545	0.908097	0.919951	0.915431	0.891927	0.869599	0.841236	0.830415	0.799458	0.803335	0.807251	0.808303	0.809359	0.78849	0.782273	0.801085	0.805933	0.802372	0.822146	0.799485	0.78473	0.801681	0.821718	0.844341	0.870612	0.866756	0.876921	0.911011	0.895343	0.940979	0.937622	0.93833	0.95317
																																															1.0646	1.04404	1.02425
1.23545	1.28364	1.29563	1.34683	1.52455	1.34405	1.26459	1.36315	1.27867	1.24059	1.20936	1.17967	1.21468	1.23002	1.24039	1.20847	1.14292	1.0695	1.06332	1.05443	1.05581	1.07157	1.05877	1.07173	1.07701	1.13435	1.13733	1.15951	1.18256	1.21086	1.19152	1.17279	1.15464	1.13704	1.11997	1.10341	1.12106	1.1107	1.10054	1.0966	1.09269	1.08881	1.08496	1.08114	1.07734	1.07356	1.06982	1.0661	1.08184	1.09805
1.07192	1.1249	1.05775	1.08272	1.1089	1.255	1.0867	1.07052	1.13709	1.22175	1.2884	1.13197	1.30974	1.25212	1.18401	1.22005	1.18069	1.39847	1.2003	1.26684	1.32695	1.39306	1.4661	1.54722	1.63784	1.55508	1.23402	1.25884	1.26072	1.26261	1.2645	1.2664	1.26831	1.27022	1.59695	1.49075	1.509	1.52771	1.54689	1.56655	1.85326	2.26844	2.12559	1.99967	1.88783	1.78784	1.69791	2.07229	2.65848	2.06441
1.84804	2.51838	1.81527	1.81035	1.75945	1.71134	1.23893	1.0553	0.954373	0.955309	0.956247	0.939575	0.967315	0.996743	1.24416	1.60694	1.61461	1.71636	1.63048	1.64219	1.67041	2.04736	1.89866	1.7679	1.65399	1.85255	1.87084	1.83256	1.92729	2.39509	2.00055	1.86558	1.8053	1.84612	1.88883	1.89318	1.89756	1.88879	1.8801	1.8715	2.99855	2.09107	2.22355	2.20785	2.19236	2.17709	2.16203	2.15594	2.14989	2.14387
						0.564922	0.566189	0.567462	0.568741	0.570026	0.571316	0.572612	0.573914	0.575222	0.576537	0.577857	0.579183	0.580515	0.581853	0.583198	0.627314	0.678651	0.755305	0.680734	0.757609	0.854056	0.971549	0.896049	0.831437	0.874145	0.88026	0.886461	0.8725	0.858972	0.910408	0.927383	0.867256	0.858772	0.869124	0.87973	0.890597	0.901736	0.913157	0.899195	0.885654	0.878397	0.842716	0.863859	0.83262
	1.11038	1.14726	1.21391	1.21176	1.27563	1.32201	1.31283	1.35574	1.25934	1.26283	1.27084	1.18478	1.20075	1.2533	1.23437	1.24467	1.25219	1.2598	1.26751	1.27531	1.23704	1.20531	1.13405	1.08108	1.1342	1.14634	1.11424	1.04374	0.998994	0.997543	0.993412	1.00557	1.0396	1.00373	0.950433	0.910995	0.907175	0.878796	0.898285	0.906831	0.886327	0.921791	0.897262	0.892787	0.888861	0.916581	0.939379	0.953259	0.965154
		1.02962	1.12168	1.14618	1.1598	1.13351	1.0985	1.08219	0.985293	1.00516	0.966994	0.859421	0.915195	0.927987	0.873863	0.961185	0.924115	0.965024	0.970837	0.893554	0.87297	0.861427	0.84458	0.82838	0.810221	0.815602	0.808645	0.874498	0.85271	0.831981	0.834872	0.811006	0.795195	0.779989	0.788848	0.797909	0.812252	0.827119	0.842541	0.846998	0.851502	0.837381	0.839683	0.841998	0.844325	0.846666	0.842081	0.837546	0.833059
			0.838784	0.862387	0.819042	0.815694	0.844124	0.914019	0.96612	0.997245	1.00491	0.999114	1.01075	1.05888	1.0397	1.04854	1.07567	1.09297	1.10475	1.12163	1.04449	1.00819	1.03742	1.03201	1.02865	1.09651	1.14737	1.12556	1.13733	1.16614	1.21828	1.15984	1.15625	1.10543	1.03971	1.0514	1.11647	1.12282	1.11899	1.1287	1.11875	1.17544	1.15308	1.08402	1.10059	1.15971	1.06098	1.07735	1.06238
			1.01821	1.27441	1.44325	1.78178	2.00904	2.38117	2.69857	3.17063	3.20157	2.91121	3.19911	3.5502	3.54688	3.7171	3.71966	3.78359	3.71543	3.64014	3.60735	3.58852	3.61501	3.66211	3.73199	3.64096	3.51193	3.46793	3.43341	3.39958	3.34411	3.29043	3.23843	3.27333	3.27637	3.36303	3.43823	3.46129	3.41651	3.4558	3.47125	3.35985	3.47368	3.47554	3.45117	3.4939	3.39549	3.42509	3.36668
			0.792081	0.94682	0.79146	0.739121	0.758384	0.778678	0.767825	0.746753	0.907918	0.746152	0.779519	0.777687	0.775864	0.77498	0.714485	0.694569	0.747343	0.694233	0.683537	0.667341	0.683879	0.68748	0.734493	0.7535	0.735807	0.734358	0.809234	0.782322	0.806404	0.803249	0.788039	0.796834	0.79616	0.873681	0.855587	0.858893	0.817698	0.878233	0.848875	0.871866	0.867939	0.804712	0.809891	0.812079	0.849968	0.855962	0.911374
			1.00433	1.0897	1.05802	0.985387	1.23269	1.17605	1.31007	1.35214	1.25857	1.28364	1.30974	1.38231	1.48267	1.40705	1.48619	1.38749	1.38948	1.39461	1.38288	1.26899	1.29677	1.36613	1.59163	1.41325	1.35827	1.26937	0.99355	1.05236	1.25795	1.15958	1.31071	1.32254	1.35324	1.35203	1.28716	1.2412	1.35409	1.32934	1.34686	1.34803	1.32265	1.30207	1.35967	1.36455	1.34576	1.26362	1.23787
						0.872659	0.879535	0.885947	0.950817	0.961788	0.968691	0.975693	0.926195	0.995479	0.999204	0.99627	0.977088	0.984056	0.974433	0.969918	0.965025	1.0106	1.05671	1.11593	1.11741	1.10759	1.09795	1.08846	1.09125	1.11267	1.12189	1.135	1.12943	1.09521	1.11491	1.11807	1.09307	1.06917	1.05434	1.0413	1.02858	1.03701	1.03561	1.08218	1.06367	1.07585	1.07735	1.08208	1.10019
																															1.22496	1.22734	1.22973	1.19372	1.15977	1.12951	1.10718	1.08571	1.12851	1.082	1.06919	1.05668	1.07705	1.09822	1.13444	1.17313	1.13051	1.14697	1.16392
							0.758156	0.890979	0.819702	0.875599	0.939677	1.01387	0.946863	0.904796	0.893049	0.870439	0.848945	0.828488	0.813383	0.79882	0.784769	0.771203	0.752954	0.735548	0.718929	0.719857	0.720786	0.727161	0.73295	0.699725	0.695688	0.691698	0.687753	0.683852	0.679996	0.70792	0.738235	0.762047	0.787445	0.783102	0.7868	0.790533	0.794302	0.803319	0.830138	0.819437	0.825265	0.855616	0.879331
										0.672095	0.723427	0.804376	0.859621	0.876288	1.04826	1.23755	1.21158	1.14451	1.15885	1.16745	1.11813	0.973285	0.97244	0.876136	0.886971	0.869559	0.903852	0.988078	1.06868	0.997578	0.960085	0.801375	0.835799	0.965875	1.03651	1.1788	1.14452	1.17175	1.3433	1.34537	1.62694	1.65248	1.78511	1.70958	1.81766	1.63922	1.61914	1.63555	1.63593

																		1.31028	1.27784	1.26035	1.22809	1.2119	1.15306	1.13786	1.07015	1.06411	1.06784	1.07159	1.05982	1.0483	1.06829	1.03329	1.01983	1.01291	1.00609	0.999366	0.992727	0.976026	0.959877	0.944254	0.931344	0.911977	0.8934	0.888678	0.884006	0.894107	0.892832	0.888586	0.887808
																										2.29965	2.38829	2.41492	2.46904	2.55388	2.64476	2.62362	2.59357	2.61544	2.60191	2.5173	2.5758	2.6033	2.11828	1.9796	2.06073	2.1488	2.24473	2.34962	2.4648	2.59186	1.75545	1.72081	1.82987
																																											1.40171	1.3214	1.36586	1.31122	1.21847	1.16519	1.22944
																																	1.33435	1.15886	1.62045	1.50443	1.40391	1.31598	1.23842	1.16949	1.49336	1.5239	1.55571	1.58887	1.62348	1.65963	1.69743	1.73699	1.77619
																																								1.0448	1.05704	0.99349	0.98966	0.985859	0.980856	0.975904	1.06485	1.0313	1.02818
																																															0.928129	0.952085	1.00729
2nd Tx dose: 100ng INS
1.26569	1.32791	1.34281	1.38894	1.34995	1.28024	1.17664	1.09094	1.00362	0.923613	0.901666	0.879955	0.871389	0.879252	0.869255	1.12169	1.48296	1.72537	1.77817	1.7225	1.70127	1.60597	1.53132	1.49838	1.49152	1.46622	1.48572	1.53945	1.64825	1.56424	1.54307	1.37359	1.37521	1.37758	1.39933	1.38729	1.40576	1.37265	1.33348	1.34901	1.3482	1.31503	1.32453	1.33728	1.39078	1.36498	1.41992	1.40373	1.44501	1.46845
1.37158	1.29281	1.26239	1.26188	1.24357	1.17586	1.10476	1.01988	0.956797	0.912868	0.900987	0.92097	0.922386	0.932587	0.932369	0.965217	0.974005	0.962971	0.955828	0.874166	0.83291	0.811248	0.802697	0.751752	0.71067	0.69067	0.671579	0.723216	0.749009	0.764195	0.79214	0.8023	0.812724	0.808039	0.790578	0.814146	0.839162	0.854813	0.865623	0.880391	0.896112	0.923832	0.922079	0.952071	0.938237	0.936915	0.960651	0.93265	0.919316	0.918073
																																0.853855	0.812457	0.779472	0.689819	0.68946	0.773441	0.752556	0.759131	0.791278	0.792891	0.687662	0.607092	0.772293	1.06102	1.69451	1.76601	2.19924	2.66074
0.665103	0.720472	0.646778	0.654807	0.663037	0.671478	0.699117	0.798859	0.931796	0.884668	0.950106	1.15275	0.960933	0.823846	0.81392	0.924332	1.15437	0.964852	1.00372	0.976408	0.959001	1.00093	1.20048	0.955408	0.901456	0.819934	0.818667	0.809571	0.799748	0.811265	0.786865	0.798553	0.795121	0.774662	0.748025	0.745605	0.719915	0.692732	0.66453	0.701588	0.706614	0.691015	0.680333	0.729294	0.71291	0.724568	0.736613	0.749066	0.706711	0.736336
0.733599	0.73053	0.682797	0.668137	0.61941	0.626421	0.60268	0.60477	0.602433	0.600537	0.584705	0.577799	0.569412	0.539645	0.577084	0.593988	0.652702	0.724297	0.689612	0.659185	0.589315	0.620103	0.6072	0.681872	0.673443	0.681572	0.704276	0.703239	0.727326	0.695193	0.707099	0.734033	0.734321	0.725527	0.720601	0.764673	0.756151	0.785643	0.789017	0.77343	0.777825	0.769411	0.755341	0.755367	0.744916	0.752518	0.756185	0.716638	0.728452	0.693332
1.07184	1.06037	0.928744	0.933812	0.901016	0.96558	0.98709	1.05167	1.09428	1.15773	1.14988	1.1939	1.18966	1.20624	1.20746	1.30473	1.35909	1.32878	1.23494	1.09228	1.1468	1.05961	1.02808	0.981977	0.968944	0.932126	0.950692	0.928192	0.935908	0.941378	0.956296	0.910355	0.894031	0.9033	0.916475	0.901538	0.931157	0.931205	0.950576	0.936045	0.910705	0.922347	0.918976	0.933384	0.945464	0.953069	0.934366	0.958203	0.939321	0.980801
1.53134	1.48474	1.47858	1.42486	1.26496	1.20255	1.11113	1.01218	0.977029	0.965795	0.826954	0.856698	0.888661	0.874099	0.804752	0.962884	1.09872	1.15569	1.16989	1.1389	1.12375	1.13706	1.11954	1.1502	1.12967	1.09082	1.02183	1.0239	1.00382	1.00461	1.0413	1.08077	1.07735	1.05692	1.03044	1.05025	1.07083	1.09224	1.11453	1.13774	1.10899	1.14043	1.11282	1.08651	1.05637	1.02786	0.96676	0.964591	0.945593	1.00387
0.719341	0.719333	0.689581	0.697895	0.659765	0.638531	0.772943	0.97903	0.992544	0.936235	0.901863	0.909201	0.946856	1.00118	0.875409	0.953314	1.02069	0.957773	0.853911	0.747913	0.732153	0.721492	0.706134	0.737931	0.874132	0.890689	0.901417	0.975837	0.91529	0.980794	1.03376	0.976397	0.924995	0.935521	0.91534	0.974288	0.97121	0.965497	0.947718	0.944334	0.939042	0.961053	1.02386	1.03198	1.02061	0.97192	1.00887	0.956542	0.934832	0.964623
2.60081	2.01057	1.74365	1.96084	1.65712	1.43487	1.34331	1.29431	1.24138	1.22043	1.06183	0.986519	0.798785	0.811527	0.931358	0.986025	1.31199	1.13721	1.13115	1.28489	1.37563	1.99344	1.58236	1.31184	1.22165	1.19109	0.964185	1.0591	0.915315	0.899338	0.883908	0.858967	0.854373	0.89281	0.901586	0.932785	0.96622	0.910502	0.988854	0.962196	1.05023	1.04977	1.06563	1.08605	1.06123	1.08152	1.28263	1.22089	1.16483	1.1721
1.20663	1.26333	1.25624	1.2446	1.2499	1.2539	1.24773	1.22188	1.19988	1.18042	1.18429	1.18821	1.17158	1.16217	1.18443	1.28834	1.3653	1.38671	1.38045	1.3229	1.27617	1.22205	1.16861	1.1578	1.15689	1.21285	1.23817	1.21457	1.23671	1.27454	1.31931	1.27858	1.2345	1.17166	1.12767	1.11143	1.10165	1.13272	1.13951	1.16626	1.1362	1.09709	1.12076	1.14547	1.1713	1.17427	1.17727	1.18646	1.15904	1.21097
2.01093	1.94368	1.71046	1.59631	1.58959	1.58293	1.70735	1.84709	1.83727	1.82416	1.83862	1.71026	1.87367	2.0716	1.96366	2.37302	2.48421	3.19626	2.64011	2.66029	2.68078	2.70159	2.72273	2.7442	2.76601	3.00515	3.28955	3.63342	4.05756	4.09028	4.12354	4.15734	4.1917	4.22663	4.26214	4.26281	4.48489	4.32344	4.27741	4.37327	4.36212	4.20332	4.5113	4.57271	4.14385	4.39889	4.47889	4.21031	4.54117	4.33658
1.02517	1.11711	1.00526	1.12917	1.18019	1.0568	1.06173	1.05637	1.33994	1.07819	1.15507	1.15214	1.18405	1.25636	1.36854	1.29672	1.31549	1.29576	1.45133	1.26366	1.38544	1.26967	1.17176	1.23575	1.04438	1.10339	1.12302	1.23279	1.21373	1.19526	1.17065	1.21303	1.1805	1.22427	1.17174	1.17617	1.13983	1.09189	1.1519	1.13812	1.12468	1.11154	1.12472	1.07132	1.06586	1.04834	1.08292	1.10304	1.02594	1.17752
0.470568	0.519078	0.486401	0.540681	0.502494	0.563324	0.582088	0.656816	0.727497	0.726181	0.674211	0.613779	0.625372	0.630417	0.591066	0.662646	0.753953	0.803106	0.818854	0.835232	1.04128	0.97963	0.924873	0.875913	0.831876	0.792055	0.737591	0.692678	0.646902	0.672212	0.699584	0.729279	0.761607	0.796934	0.835698	0.801659	0.798327	0.862055	0.813292	0.776334	0.71831	0.805387	0.694157	0.829574	0.806329	0.815153	0.84225	0.77521	0.735399	0.737273
																																		0.832163	0.857521	0.884472	0.913172	0.943797	0.976548	1.01165	1.00081	0.925388	0.873539	0.820755	0.751084	0.832987	0.780255	0.914476	0.772212
1.54698	1.67677	1.59303	1.63521	1.67287	1.71019	1.72382	1.74484	1.68588	1.78974	1.72119	1.69681	1.5425	1.52565	1.63504	1.76467	1.66022	1.50411	1.39727	1.3046	1.24657	1.26932	1.29292	1.31741	1.34284	1.38829	1.44425	1.31167	1.20139	1.13042	1.16183	1.13047	1.07899	1.07329	1.10501	1.13828	1.13578	1.12544	1.11449	1.09598	1.12027	1.1364	1.18544	1.23975	1.19903	1.12682	0.895236	0.903444	0.932278	0.918685
1.04141	0.97083	1.05151	1.18248	1.1878	1.19317	1.19858	1.20405	1.17971	1.1844	1.12938	1.07924	1.02498	1.0584	1.10784	1.16211	1.22198	1.26483	1.30824	1.30908	1.245	1.25972	1.24383	1.20571	1.1804	1.15614	1.15377	1.09912	1.16328	1.20525	1.16652	1.2299	1.20252	1.16241	1.22908	1.17711	1.1798	1.20496	1.16491	1.13229	1.13585	1.14565	1.07205	1.09608	0.959562	1.00553	1.12053	1.10171	1.19681	1.04172
0.85243	0.835599	0.799432	0.842572	0.798087	0.767026	0.73767	0.764236	0.70694	0.657636	0.644499	0.723149	0.721004	0.718872	0.716753	0.714646	0.712551	0.704516	0.704648	0.723306	0.728997	0.707262	0.722304	0.665637	0.671445	0.677355	0.68337	0.661076	0.731922	0.819775	0.86554	0.837435	0.868778	0.892454	0.88582	0.911404	0.875252	0.841858	0.87921	0.848324	0.851227	0.854559	0.985807	1.00887	1.04381	1.08125	1.12149	1.12185	1.24642	1.14497
0.91923	0.915653	0.947027	0.989006	1.02501	1.06316	1.13944	1.18042	1.14084	1.19464	1.21416	1.23009	1.27206	1.27825	1.33583	1.33782	1.33553	1.34221	1.30935	1.26128	1.21926	1.17995	1.15557	1.11458	1.11526	1.13141	1.13971	1.14814	1.1452	1.14227	1.13936	1.2333	1.09103	1.08167	1.0729	1.08343	1.15466	1.26874	1.23983	1.26859	1.36561	1.46592	1.54363	1.48195	1.41764	1.33846	1.26765	1.25388	1.24189	1.23013
1.49357	1.45232	1.36559	1.27742	1.18925	1.22942	1.26983	1.27676	1.30938	1.3021	1.31903	1.31655	1.25066	1.28943	1.28907	1.36368	1.4395	1.50953	1.50179	1.48178	1.43026	1.47476	1.42765	1.33534	1.26366	1.25674	1.1835	1.17779	1.23737	1.21327	1.1459	1.13794	1.10624	1.07626	1.11211	1.09058	1.09937	1.14883	1.17991	1.14224	1.12468	1.09307	1.11438	1.09672	1.14263	1.1997	1.23459	1.19587	1.24919	1.19332
0.622407	0.602274	0.618313	0.646506	0.643389	0.674467	0.689844	0.703442	0.713706	0.736663	0.759355	0.772638	0.817813	0.872644	0.84369	0.900988	1.02859	1.11565	1.1553	1.17682	1.15432	1.06638	1.1605	1.13087	1.10272	1.07594	1.12687	1.18286	1.24118	1.30554	1.19782	1.22994	1.23737	1.193	1.11502	1.05446	1.02658	0.9792	0.972626	0.966138	0.904737	0.884159	0.994716	1.03781	1.03143	1.03888	1.04982	0.986483	0.992394	1.01212
1.04072	1.04619	1.04989	1.05482	1.01533	1.0054	0.989446	0.973994	0.970809	0.968095	0.978166	0.977741	0.982714	0.994392	1.02652	1.06375	1.01865	1.03603	1.01795	0.980975	0.972621	0.977459	0.976591	0.980307	0.984116	0.973876	0.984804	1.0078	0.972237	0.943336	0.930417	0.940016	0.920855	0.924967	0.907961	0.894619	0.885802	0.870062	0.852872	0.829499	0.814449	0.824956	0.799528	0.805937	0.788211	0.783207	0.781723	0.771857	0.775436	0.781081
1.40601	1.34454	1.17142	1.21741	1.26715	1.32112	1.37991	1.44416	1.31239	1.41692	1.43312	1.46844	1.64503	1.46864	1.42244	1.47793	1.50775	1.51402	1.49141	1.48502	1.35627	1.32961	1.33473	1.35689	1.22335	1.16984	1.17012	1.20597	1.27006	1.32566	1.38635	1.45884	1.67355	1.52014	1.53524	1.52341	1.51176	1.49929	1.48703	1.4045	1.27547	1.24137	1.20905	1.17837	1.14921	1.20014	1.25579	1.31686	1.38309	1.33757
							4.52311	4.7079	4.90842	4.79118	3.27697	3.41212	4.55083	3.25521	4.11965	2.50909	2.28575	3.21538	2.70691	2.3373	2.39313	3.23436	2.55267	2.10831	2.00452	2.76106	2.41558	2.14694	1.93207	2.23381	2.64724	2.57769	2.16101	2.44807	2.82307	2.5175	2.27161	2.18593	2.96498	3.07583	2.65383	2.33365	3.1147	2.54757	2.15516	2.28769	2.1874	2.33518	2.02281
0.691455	0.680551	0.677579	0.691304	0.654142	0.669306	0.665719	0.663096	0.668678	0.657612	0.643087	0.637136	0.624827	0.619918	0.639304	0.653575	0.65745	0.689393	0.686375	0.70226	0.667742	0.634202	0.621946	0.603624	0.594081	0.561065	0.541939	0.568238	0.567409	0.563593	0.552312	0.589809	0.596474	0.612001	0.611324	0.680403	0.678287	0.681661	0.665591	0.662531	0.639703	0.604837	0.564968	0.58754	0.625602	0.650243	0.649697	0.68269	0.704809	0.719752
1.13297	1.15105	1.18368	1.18628	1.1827	1.15526	1.14513	1.14248	1.15672	1.16494	1.17701	1.16906	1.15377	1.16499	1.19654	1.31855	1.41119	1.48619	1.52345	1.54659	1.50563	1.47619	1.46685	1.47379	1.48442	1.49522	1.50617	1.51728	1.52424	1.56104	1.6022	1.59444	1.589	1.61318	1.59064	1.63004	1.58219	1.52025	1.49114	1.42828	1.45358	1.45311	1.47585	1.49771	1.54497	1.53742	1.56011	1.53942	1.51927	1.48626
0.667388	0.685384	0.752405	0.745187	0.761355	0.778239	0.730032	0.648293	0.590216	0.562684	0.553855	0.672136	0.854656	1.07877	1.46221	1.52081	1.62176	1.67277	1.72709	1.78506	1.81963	1.79429	1.63896	1.62621	1.69629	1.70816	1.61647	1.57799	1.4486	1.54538	1.53011	1.51513	1.50044	1.43162	1.4033	1.32513	1.34779	1.33236	1.34044	1.37479	1.36981	1.36091	1.41677	1.36795	1.32238	1.40434	1.37357	1.41073	1.42435	1.46931
1.02134	1.03685	1.06758	1.05896	1.06949	1.03344	1.0157	1.03376	1.03156	1.0281	1.06183	1.11666	1.14226	1.15859	1.12238	1.17197	1.14602	1.12737	1.11057	1.04747	1.02831	1.07162	1.11875	1.19879	1.07589	1.05791	1.00294	1.00868	1.00816	0.950649	1.05599	1.04789	1.12272	1.14061	1.30905	1.15134	1.26457	1.20459	1.18173	1.07086	1.05806	1.05402	1.11229	1.08506	1.03366	0.990359	1.01101	1.03253	1.11843	1.10663
6.68152	7.49051	8.19007	8.47994	8.29889	8.12542	8.50445	8.38595	8.08406	7.80486	7.62086	8.18633	7.99525	5.37524	5.14238	6.19171	6.70212	6.43479	6.04332	9.08935	9.2918	10.5238	7.38244	4.65555	3.39976	2.67753	2.20838	1.74135	1.43737	1.76918	1.59815	1.52905	1.64178	1.27528	1.00712	0.960245	0.917542	0.878476	1.02854	1.24043	0.942546	0.760028	0.63673	0.77496	0.98985	1.36964	1.08328	1.14462	1.10236	1.22381
0.632683	0.744948	0.781072	0.776442	0.771867	0.767346	0.754845	0.657247	0.675651	0.726245	0.821658	0.838698	0.85646	0.930326	0.972551	0.97421	0.965933	0.957795	0.952006	0.843784	0.85921	0.841355	0.866692	0.893602	0.895398	0.908493	0.932933	0.904622	0.896272	0.902757	0.875097	0.869201	0.899516	0.914351	0.912336	0.929625	0.862769	0.848199	0.836909	0.791757	0.781391	0.788968	0.769393	0.789284	0.751901	0.771376	0.791887	0.801047	0.784644	0.807866
																																												0.990702	1.08886	1.03224	1.12699	1.14137	1.15611
		0.970447	0.945373	0.950527	1.0004	1.10245	1.12321	1.13323	1.12821	1.08799	1.0491	1.04448	1.0235	0.997827	1.00667	1.05047	1.12457	1.21369	1.23657	1.1729	1.21538	1.22878	1.22953	1.19852	1.18616	1.25105	1.31159	1.27527	1.35169	1.40554	1.44793	1.39886	1.37364	1.35554	1.31616	1.30186	1.31818	1.33193	1.29465	1.32558	1.31216	1.33849	1.31456	1.32388	1.31122	1.32139	1.39044	1.4671	1.51422
		1.05246	1.02254	1.03715	0.973906	0.917932	0.899537	0.900151	0.906574	0.938041	0.904469	0.899363	0.941204	1.09216	1.20492	1.30744	1.36243	1.38789	1.41392	1.41065	1.40634	1.31673	1.33159	1.39747	1.29466	1.32849	1.31459	1.29123	1.30536	1.30149	1.30992	1.32553	1.36262	1.41375	1.38915	1.39237	1.36799	1.34561	1.43062	1.40466	1.44612	1.49535	1.52294	1.54383	1.52217	1.49755	1.49798	1.50101	1.50168
		0.793725	0.718409	0.735598	0.773919	0.779153	0.788972	0.782996	0.835991	0.841675	0.8437	0.824803	0.819226	0.79932	0.870723	0.85755	0.896843	0.869345	0.87319	0.87707	0.880985	0.884934	0.88892	0.867027	0.886938	0.902525	0.944163	0.923389	0.932917	0.970555	0.998368	1.00809	1.02946	1.02451	0.998791	1.0099	1.01549	0.999418	1.0291	1.04205	1.00751	0.997881	1.00241	0.969986	1.00179	0.96862	0.954134	0.968734	0.991003
																																																1.18541	1.22011
			0.851432	0.779825	0.791759	0.723609	0.710363	0.716112	0.762575	0.851437	0.891868	0.9173	0.90979	0.897096	0.934505	0.958235	1.00633	1.03482	1.00221	0.955689	0.998071	0.963427	0.975003	1.10837	1.18214	1.17578	1.16637	1.16783	1.16374	1.1101	1.09387	1.05312	1.01529	0.992868	0.940999	0.925275	0.910068	0.911051	0.89339	0.898296	0.874223	0.778592	0.701819	0.720956	0.794812	0.885526	0.900851	0.916715	0.933149
			0.955008	0.969595	0.972563	0.977597	0.980779	0.958376	0.963961	0.90831	0.931861	0.976605	1.03286	1.01004	1.02389	1.02384	1.00822	0.988594	0.974961	0.979021	1.05775	1.05427	1.05242	1.04186	1.06228	0.979402	1.00452	1.15202	0.867942	0.696252	0.732148	0.771946	0.81632	0.866107	0.922361	0.98643	1.06006	1.14558	1.20206	1.25438	1.30931	1.32932	1.31838	1.25034	1.24016	1.22473	1.22628	1.14855	1.10802
			1.30015	1.28273	1.19194	1.19055	1.02749	1.18673	1.50565	1.5119	1.5505	1.94112	1.99617	1.50044	1.20195	1.28178	1.10388	1.21943	1.362	1.54231	1.79378	1.67049	1.56306	1.46861	1.60614	1.51432	1.6756	1.46514	1.30165	1.30712	1.30914	1.11741	1.18636	1.26438	1.35338	1.90373	1.74002	1.60223	1.104	0.842126	0.855586	0.869483	0.752436	0.722376	0.723786	0.662435	0.666647	0.723617	0.791233
					0.948542	0.935489	0.912462	0.908782	0.905132	0.888765	0.872979	0.857744	0.843031	0.828815	0.888939	0.926556	0.967497	0.957119	0.946961	0.88186	0.908265	0.9363	0.940311	0.931001	0.921873	0.912922	0.904144	0.895532	0.887083	0.878793	0.902665	0.860693	0.872731	0.885111	0.88624	0.802528	0.854963	0.827256	0.863405	0.879916	0.881863	0.869398	0.878301	0.867106	0.838712	0.866856	0.824028	0.878645	0.857469
						0.827473	0.779473	0.757007	0.742021	0.754337	0.762934	0.797267	0.834837	0.861572	0.886497	0.869624	0.853382	0.929483	0.852286	0.891414	0.99366	0.957001	0.92295	0.951692	0.939663	0.914408	0.962557	0.993528	1.00439	0.98311	1.04704	1.08789	1.14445	1.10616	1.05004	1.06846	1.2182	1.04756	1.11941	1.08862	1.14471	1.01435	1.06734	0.978276	1.02165	0.953075	1.06041	1.09387	1.11986
							7.74381	5.59069	7.98719	8.18093	5.39621	8.23208	7.98827	8.32372	8.58784	8.86926	9.16976	9.49133	9.83628	10.2072	10.6073	10.5983	11.3432	10.4285	9.65024	13.3927	13.8917	14.4294	12.4198	15.0252	15.0597	14.6376	13.1765	11.8934	14.2957	15.4222	13.5409	12.0687	16.2925	16.2166	14.5461	14.6067	16.6194	15.3971	14.3422	13.5855	12.9046	12.2887	12.2937
											1.03777	0.965924	1.01738	1.12326	1.13922	1.28122	1.25847	1.20229	1.16839	1.13417	1.10189	1.07141	1.0095	0.954351	0.939486	0.889302	0.869765	0.820855	0.744294	0.741723	0.749724	0.7579	0.766256	0.716561	0.672919	0.634288	0.599851	0.601996	0.604156	0.606332	0.608524	0.610731	0.612955	0.603537	0.594404	0.639923	0.692992	0.752582	0.69726
												0.536294	0.54056	0.549729	0.636353	0.550494	0.551664	0.552839	0.608187	0.590506	0.604834	0.541291	0.518925	0.528697	0.496016	0.513726	0.532748	0.553232	0.538262	0.491898	0.515613	0.479371	0.502109	0.527111	0.554734	0.585412	0.619682	0.658213	0.701854	0.688715	0.676059	0.66386	0.667456	0.671091	0.674767	0.624795	0.581714	0.639761	0.710676
												0.94	1.13787	0.974095	1.10902	1.28733	1.39741	1.55892	1.76266	1.56209	1.4025	1.39354	1.38468	1.37595	1.52751	1.71661	1.80475	1.69958	1.4067	1.40533	1.40397	1.40261	1.40125	1.4536	1.51002	1.50517	1.50035	1.46247	1.86882	1.88315	1.58366	1.64616	2.00351	1.69662	1.67905	1.66479	1.65078	1.68523	1.76285
													0.62775	0.677629	0.715275	0.728885	0.769102	0.814017	0.864503	0.848596	0.833264	0.818476	0.804204	0.79042	0.777664	0.786599	0.762076	0.797482	0.824939	0.884413	0.95313	0.928058	0.906409	0.952037	1.0025	1.01847	0.825376	0.851467	0.879262	0.896518	0.873548	0.851726	0.835553	0.912351	1.07028	1.29434	1.12563	1.1174	1.11903
													0.624068	0.679889	0.746677	0.828017	0.929244	1.05867	1.22998	1.25664	1.25457	1.25077	1.27526	1.19563	1.14571	1.0998	1.05742	0.988175	0.955727	1.00701	0.955996	0.97618	0.957471	1.04483	1.04111	1.02149	1.11002	1.14193	1.1277	1.10297	1.10817	1.07708	1.03349	1.05083	1.07881	1.10833	1.11405	1.12037	1.11582
													1.5156	1.4548	1.6323	1.73615	1.75665	1.7921	1.73361	1.76377	1.70175	1.71269	1.7239	1.60082	1.52989	1.57615	1.6843	1.76245	1.70976	1.66013	1.59952	1.61381	1.51318	1.53239	1.68463	1.62573	1.60937	1.54253	1.5274	1.56022	1.56187	1.56034	1.59856	1.55281	1.47329	1.42088	1.43392	1.40964	1.40945
																			1.05295	0.991508	0.925101	1.01124	0.925544	0.992475	0.95703	0.955561	0.913877	0.933868	1.16944	1.56396	1.49782	1.43704	1.61462	1.84229	2.14469	1.66042	1.35456	1.39944	1.19306	1.04091	1.19203	0.986783	0.998353	1.01044	0.972599	0.987544	1.00296	0.946542	0.963515
																										1.37086	1.50328	1.52149	1.5421	1.51957	1.4977	1.53233	1.56859	1.49979	1.52996	1.56137	1.60957	1.58585	1.59375	1.2843	1.35538	1.36841	1.45006	1.49621	1.48775	1.6392	1.61682	1.58484	1.64124
																														0.997767	0.980207	0.963806	0.981244	0.965839	0.971887	0.97306	0.977735	1.04715	0.992118	1.00162	0.918825	0.92046	0.973262	1.06322	1.16025	1.27678	1.29935	1.34266	1.3482
																																						1.25489	1.33034	1.28464	1.30121	1.27578	1.27247	1.17456	1.11499	1.13896	1.12975	1.14039	1.15278
																																										4.36563	4.59346	4.57393	4.8139	5.09219	5.03862	5.20514	5.30644
																																												1.1459	1.17229	1.23281	1.29994	1.37479	1.31538
																																															1.08093	1.0383	1.01968
1.48224	1.46402	1.45398	1.46204	1.47008	1.50671	1.52579	1.51418	1.52074	1.53769	1.51348	1.49217	1.43533	1.40593	1.39631	1.40187	1.4294	1.43423	1.48321	1.47571	1.50016	1.4663	1.40148	1.39692	1.40301	1.44494	1.41078	1.42409	1.40639	1.37737	1.36932	1.27596	1.26254	1.24834	1.25782	1.29471	1.36016	1.37862	1.43883	1.42911	1.4253	1.41834	1.41788	1.4147	1.35355	1.29747	1.24585	1.29301	1.35685	1.43511
0.689314	0.759118	0.717958	0.736764	0.744989	0.773723	0.771814	0.771154	0.76605	0.7543	0.781547	0.701662	0.703784	0.673717	0.660296	0.65665	0.732143	0.751213	0.782508	0.767575	0.753426	0.73038	0.740042	0.771817	0.773773	0.855035	0.836291	0.818656	0.820177	0.864493	0.876714	0.897316	0.993487	0.952542	0.938693	0.92021	0.837394	0.81126	0.796999	0.817736	0.818869	0.757566	0.772366	0.842709	0.930793	1.04678	1.01699	0.84799	0.84392	0.857092
0.843283	0.875808	0.856829	0.819172	0.83499	0.833052	0.830735	0.830803	0.830622	0.795175	0.809014	0.823343	0.82483	0.880152	0.943429	1.01651	1.15487	1.26294	1.32587	1.32454	1.34483	1.40991	1.46339	1.47122	1.46987	1.53584	1.46809	1.43881	1.46569	1.38978	1.33655	1.28492	1.22018	1.1853	1.31959	1.16035	1.14384	1.10906	1.1406	1.06155	1.01375	1.01652	0.939623	0.868961	0.776265	0.732854	0.662228	0.664446	0.646996	0.643273
0.829298	0.7694	0.803686	0.871413	0.899173	0.926984	0.922363	0.912569	0.878514	0.863264	0.864024	0.967723	0.963713	0.980595	1.03607	1.06512	1.05167	1.04105	1.00221	0.963602	0.969775	1.00843	1.06274	1.05915	1.06747	1.09901	1.07151	1.10422	1.0917	1.10094	1.08432	1.10284	1.09811	1.14405	1.15762	1.15913	1.16687	1.15471	1.1368	1.16919	1.17707	1.16988	1.12955	1.13219	1.13076	1.14281	1.11381	1.15448	1.19854	1.18649
3.01292	2.90443	2.70526	2.76583	2.79902	2.70666	2.87061	2.98868	2.90147	2.90601	2.89305	2.78456	2.75944	3.04156	3.04318	3.11585	2.84564	2.86815	2.84054	2.46411	2.71114	2.75142	2.33079	2.27731	2.41888	2.76762	2.49379	2.54445	2.58093	2.53556	2.91025	2.57046	2.70763	2.7093	2.65401	2.86612	2.93378	2.94477	2.95585	3.03663	2.95839	2.88404	2.81079	2.94619	3.09837	3.1517	3.3873	3.33198	3.20802	3.16443
1.02896	1.06487	1.09382	1.15321	1.16944	1.1035	1.12535	1.11031	1.02657	0.952818	0.818301	0.815591	0.78037	0.738491	0.788058	0.844757	0.932007	0.94684	0.948432	0.950029	0.944255	0.950575	0.979983	1.04106	1.02087	1.06225	1.03817	1.01799	1.0291	1.0423	1.06942	1.02658	1.20436	1.22081	1.17062	1.22989	1.25515	1.19061	1.10232	1.04398	1.01545	1.07194	1.03686	1.02659	0.981283	0.980078	1.00036	1.0227	1.00407	0.988777
1.13794	1.12957	1.14885	1.15008	1.15159	1.13535	1.1217	1.13477	1.13346	1.13138	1.13741	1.17281	1.20187	1.17719	1.15545	1.19296	1.2285	1.26113	1.27565	1.28555	1.28137	1.27722	1.2731	1.25374	1.23496	1.2529	1.20678	1.22006	1.23365	1.18977	1.19799	1.19761	1.21437	1.2126	1.18333	1.17216	1.19155	1.15853	1.1161	1.14531	1.15219	1.15966	1.1629	1.17106	1.13908	1.19032	1.19474	1.167	1.11312	1.12988
0.692131	0.664932	0.675361	0.679686	0.701422	0.682179	0.680721	0.681646	0.722557	0.735218	0.762471	0.747695	0.733677	0.730353	0.675138	0.715463	0.673663	0.743793	0.761432	0.721935	0.746968	0.773798	0.776926	0.872885	0.873988	0.890603	0.857822	0.863979	0.848395	0.85596	0.85576	0.83301	0.848811	0.829466	0.83034	0.834864	0.790647	0.781376	0.770783	0.754276	0.735028	0.765128	0.770786	0.750558	0.747519	0.751877	0.755081	0.738689	0.753122	0.748516
1.37849	1.29435	1.26269	1.19602	1.16112	1.17686	1.10016	1.11383	1.1259	1.2368	1.28928	1.26553	1.30732	1.28764	1.29131	1.40489	1.425	1.50186	1.50736	1.4729	1.48404	1.47299	1.44522	1.42855	1.36761	1.35082	1.32891	1.33455	1.3336	1.33477	1.33045	1.36296	1.36319	1.37229	1.39713	1.38535	1.38692	1.34312	1.31733	1.29252	1.26753	1.26887	1.25802	1.2436	1.19972	1.20911	1.12145	1.10391	1.11296	1.13405
1.48114	1.46651	1.48162	1.39262	1.35872	1.3279	1.35941	1.46786	1.4279	1.38504	1.28679	1.1985	1.27872	1.12902	1.16254	1.19811	1.2493	1.31561	1.28326	1.28217	1.24156	1.25371	1.333	1.35913	1.40207	1.43387	1.43741	1.47488	1.50351	1.47233	1.45662	1.47025	1.4755	1.48077	1.49453	1.47322	1.45252	1.46114	1.48842	1.4335	1.38933	1.33862	1.35002	1.36401	1.40553	1.44252	1.36146	1.37783	1.40036	1.43158
1.05525	1.07234	1.07327	1.0847	1.1187	1.14508	1.15878	1.17236	1.20668	1.24206	1.23764	1.23922	1.24913	1.20362	1.15226	1.17059	1.16925	1.16333	1.1549	1.11781	1.08391	1.07314	1.04906	1.0148	0.985332	0.994719	0.998723	0.996796	0.994876	0.994116	1.00011	1.00141	1.02493	1.00631	1.088	1.08189	1.12084	1.09	1.13741	1.15185	1.18255	1.26212	1.23155	1.19414	1.24021	1.2036	1.22947	1.26512	1.30642	1.30008
0.81049	0.785524	0.748215	0.737647	0.655326	0.703201	0.675913	0.678471	0.652183	0.678394	0.655992	0.666988	0.683359	0.687927	0.713373	0.740774	0.768289	0.797928	0.77155	0.833916	0.858397	0.815782	0.777197	0.742098	0.726512	0.78049	0.787861	0.79079	0.822198	0.789591	0.825373	0.85962	0.859557	0.859495	0.886449	0.893479	0.910326	0.923324	0.905845	0.892591	0.839411	0.847281	0.848598	0.805875	0.84707	0.8049	0.79478	0.789613	0.764848	0.723298
1.28685	1.23018	1.15151	1.14535	1.11161	1.06593	1.06595	1.09638	1.05994	1.07724	1.11327	1.15649	1.1527	1.16921	1.18619	1.30578	1.43744	1.47431	1.51818	1.47453	1.48124	1.47305	1.41073	1.46566	1.42663	1.4067	1.40787	1.40777	1.42359	1.43976	1.46095	1.44369	1.48254	1.54734	1.61762	1.52383	1.57725	1.48302	1.39184	1.32708	1.30617	1.32965	1.3107	1.32304	1.33562	1.34845	1.36152	1.37484	1.38843	1.40229
0.961725	0.953856	0.95693	0.940311	0.94781	0.955257	0.940439	0.944181	0.938014	0.903655	0.889616	0.895706	0.873795	0.860259	0.859342	0.934129	0.910563	0.912282	0.926448	0.875182	0.887073	0.850832	0.828742	0.825986	0.828914	0.816172	0.806733	0.799528	0.789927	0.811358	0.80685	0.812629	0.828227	0.800966	0.804662	0.775427	0.726835	0.682522	0.657385	0.651253	0.625304	0.653052	0.63516	0.679407	0.692908	0.697046	0.710981	0.710079	0.735883	0.741842
0.964751	0.946603	0.960653	0.911767	0.937605	0.942405	0.913236	0.914606	0.913736	0.930004	0.948111	0.966937	0.961405	0.955937	0.955505	0.975088	0.963333	0.947088	0.944446	0.969666	1.00084	1.01388	1.02727	1.04101	1.05925	1.04577	1.06424	1.0686	1.08723	1.08545	1.08343	1.08493	1.08435	1.07915	1.06572	1.06315	1.05292	1.06558	1.05527	1.04072	1.06831	1.09071	1.08661	1.08559	1.06786	1.0748	1.05231	1.05599	1.0529	1.03722
1.21349	1.14502	1.16153	1.12083	1.15304	1.20232	1.22741	1.20451	1.23032	1.2278	1.25287	1.22405	1.238	1.19076	1.17888	1.23768	1.2761	1.27501	1.25477	1.23039	1.19845	1.23488	1.29291	1.30594	1.3322	1.33816	1.35164	1.34067	1.33625	1.3506	1.37753	1.39976	1.44385	1.47874	1.4439	1.4535	1.52474	1.5726	1.57172	1.56979	1.52373	1.51124	1.51284	1.51135	1.53418	1.55771	1.54032	1.50235	1.45738	1.42013
0.476502	0.501598	0.53418	0.555365	0.642162	0.761117	0.934162	0.930709	0.927281	0.923878	0.9205	0.917146	0.913817	0.910513	0.907231	1.00563	1.12797	1.28421	1.30287	1.26887	1.2897	1.23653	1.19001	1.24097	1.35865	1.25415	1.21743	1.25945	1.30447	1.22488	1.15444	1.17856	1.24088	1.11197	1.10037	1.12621	1.05256	1.04617	1.10231	1.05232	1.25041	1.3104	1.37644	1.1603	1.15359	1.14697	1.14041	1.13394	1.12753	1.12195
																																	1.23464	1.15489	1.08481	1.02276	0.967418	0.977627	1.00527	1.00231	0.980776	0.995542	1.07375	1.1479	1.20694	1.18812	1.05791	1.18455	1.24728
0.816133	0.833481	0.832955	0.799445	0.81355	0.828162	0.843308	0.859019	0.872211	0.853388	0.860492	0.822588	0.787882	0.755986	0.726572	0.699361	0.674115	0.573646	0.644883	0.736322	0.857976	1.02779	0.905985	0.947055	0.980761	1.09665	1.04577	0.86303	0.961507	1.04619	1.13817	1.46878	1.31361	1.1056	1.31547	1.65723	1.40855	1.43482	1.60023	1.1305	1.1295	1.0274	1.03465	1.08246	1.29207	0.985975	0.981778	0.977618	0.973492	0.906569
																																						65.196	75.1718	88.7519	5.5175	2.16686	1.34815	0.978462	0.767891	1.05033	1.66141	1.27601	1.86286
1.3958	1.3699	1.27281	1.34975	1.32905	1.40606	1.29765	1.28372	1.25412	1.25865	1.65018	2.39527	1.97011	2.45366	2.53916	2.45961	2.07717	2.89485	1.99025	1.5164	1.61877	1.73596	1.78885	1.84507	1.90493	1.96457	2.02806	2.09579	2.1682	2.2458	2.32916	2.41894	3.07976	2.08464	2.40544	1.98232	2.76363	2.60509	2.32124	1.49047	1.31613	1.48098	1.41725	1.28525	1.37352	1.38608	1.42395	1.3512	1.3853	1.32577
				5.721	5.55911	5.40613	5.26135	5.12411	4.99386	4.87006	4.75226	4.64001	4.53295	4.74966	4.49196	5.24873	5.44533	5.65723	5.88629	6.13469	6.40497	6.70017	5.82526	4.59687	1.66986	1.02023	0.734494	0.92634	1.25384	1.93954	4.28041	3.09171	2.73137	2.77053	2.08058	1.66576	1.97406	2.15804	1.677	1.66789	1.75306	1.8474	1.95247	2.07021	2.20307	2.35414	2.59071	2.88015	3.24238
1.02978	0.957672	1.01662	1.02433	1.05059	1.02133	1.05635	1.06244	1.03962	1.03029	1.01402	0.998953	1.00284	0.985913	0.95287	0.993735	1.03578	1.05306	1.02429	0.998436	0.969887	0.947237	0.913301	0.890999	0.893731	0.906668	0.909236	0.930521	0.952833	0.964904	0.954739	0.934527	0.909682	0.890568	0.866713	0.845263	0.848958	0.902621	0.933519	0.92872	0.941007	0.939595	0.941414	0.943241	0.9292	0.920363	0.927676	0.941675	0.97923	0.994965
0.993232	1.09015	1.1084	1.13942	1.04329	1.13467	1.13139	1.14201	1.14824	1.1619	1.15029	1.10457	1.09407	1.08317	1.12007	1.09045	1.09263	1.11274	1.14868	1.18701	1.07529	1.06868	1.12732	0.993667	0.94581	0.932711	0.893182	0.909084	0.912501	0.944777	1.00776	1.02278	1.04904	1.05371	1.05841	1.03838	1.01592	1.07792	1.085	1.09217	1.09944	1.10681	1.11428	1.12185	1.1037	1.08612	1.0691	1.0526	1.0366	1.09528
																															2.44193	2.30279	2.32385	2.35372	2.38437	2.41583	2.44813	2.48131	2.5154	2.55044	2.58647	2.62353	3.05283	3.30216	3.28411	3.0328	2.94439	2.82318	2.78519
	1.42942	1.74559	1.58198	1.78602	1.66966	1.68651	1.68947	1.56724	1.62136	1.73349	1.62452	1.44463	1.46526	1.32994	1.4776	1.44657	1.4684	1.35696	1.31129	1.33653	1.36428	1.37131	1.30796	1.28432	1.31815	1.31561	1.32934	1.28689	1.30341	1.30905	1.29017	1.24261	1.26808	1.25368	1.23961	1.22585	1.20048	1.18601	1.22826	1.20797	1.2327	1.18897	1.19847	1.25819	1.24378	1.25517	1.33866	1.31452	1.27303
																							1.20096	1.20143	1.18591	1.17077	1.15602	1.14164	1.15449	1.17317	1.18456	1.19857	1.21291	1.23059	1.2382	1.24591	1.25371	1.26161	1.29056	1.32087	1.35264	1.38598	1.42099	1.65928	1.27152	1.27068	1.2397	1.2102	1.45722
		0.876124	0.860005	0.845894	0.811583	0.828749	0.846252	0.824792	0.824965	0.795117	0.80351	0.813338	0.823409	0.7695	0.877079	0.863352	0.859841	0.858978	0.88904	0.887947	0.868703	0.850925	0.836502	0.841913	0.846581	0.832253	0.884362	0.912661	0.887453	0.878437	0.861561	0.815838	0.801201	0.77437	0.757965	0.739688	0.690406	0.682246	0.682687	0.681953	0.712234	0.715096	0.708893	0.720184	0.761728	0.775765	0.767083	0.766489	0.835386
		0.735231	0.789404	0.773765	0.790527	0.778454	0.773551	0.764783	0.769855	0.741157	0.757349	0.754686	0.757983	0.820763	0.919444	0.958001	0.9791	1.0287	0.999382	0.959181	0.88701	0.867524	0.789841	0.755534	0.794402	0.724505	0.713174	0.692851	0.69547	0.69623	0.667197	0.64244	0.611446	0.600562	0.624532	0.630949	0.628109	0.627544	0.598069	0.612704	0.613865	0.630413	0.655773	0.652381	0.676804	0.678096	0.723923	0.714876	0.748397
																																																	0.917549
																												1.33156	1.37442	1.42012	1.46897	1.42203	1.45747	1.49472	1.53393	1.57525	1.61065	1.58215	1.58882	1.57587	1.57165	1.55203	1.55661	1.53476	1.56255	1.53371	1.51006	1.48222	1.43528
						0.834414	0.800195	0.738297	0.732642	0.727073	0.782734	0.847623	0.924244	0.872151	0.825617	0.783796	0.772621	0.761759	0.751199	0.740927	0.704361	0.688553	0.71069	0.683297	0.675097	0.667091	0.685447	0.730394	0.744306	0.709349	0.702564	0.691501	0.706533	0.688249	0.675343	0.67286	0.643716	0.634127	0.624699	0.596253	0.580049	0.590482	0.528604	0.547215	0.567183	0.52188	0.532151	0.532138	0.542443
																																							2.21673	2.29675	2.38277	2.48547	2.57592	2.60127	2.54439	2.81089	2.93994	2.78767	2.90767
											0.98803	0.988918	0.977277	0.958374	0.95412	0.938902	0.924161	0.909876	0.919814	0.929971	0.935321	0.940733	0.91932	0.93143	0.927868	0.912841	0.931908	0.923552	0.931371	0.930839	0.929534	0.923954	0.91844	0.935595	0.953403	0.955696	0.95262	0.963924	0.938773	0.962033	0.949067	0.950124	0.934105	0.937065	0.936837	0.937147	0.949008	0.961172	0.963885
													0.718743	0.76361	0.835548	0.945087	0.909215	0.899161	0.901535	0.90792	0.861063	0.855503	0.855186	0.847875	0.868459	0.877241	0.929845	0.930684	0.890318	0.924637	0.921237	0.885754	0.944915	0.910002	0.865556	0.862732	0.756843	0.890382	0.868424	0.796209	0.861084	0.843715	0.834694	0.859999	0.88475	0.88281	0.908086	0.932805	0.921188
																					0.493275	0.474101	0.472188	0.487973	0.524823	0.489149	0.458016	0.506964	0.567625	0.507105	0.528479	0.514523	0.528316	0.545476	0.590109	0.597241	0.624682	0.602115	0.581121	0.612728	0.647971	0.680955	0.728887	0.77032	0.824919	0.881682	0.911563	0.864566	0.915004
																								1.01124	1.0354	1.1653	1.18132	1.19779	1.21472	1.23214	1.25006	1.26852	1.28753	1.30711	1.27052	1.23593	1.26265	1.29056	1.2752	1.29189	1.22718	1.13044	1.04784	0.976491	0.983143	0.989886	0.996723	1.00365	1.01068
																																							1.18025	1.20564	1.29985	1.29634	1.29284	1.28936	1.2859	1.28245	1.27903	1.27563	1.27224
																																												3.11674	2.84225	2.95141	2.42694	2.14013	3.13222


2nd Tx dose: 200ng INS
																																	2.63528	2.6455	2.46674	2.46124	2.62104	2.68081	2.63238	2.18245	1.96779	1.88683	1.82675	1.80562	1.84159	1.85811	1.81389	1.82283	1.8128
0.53713	0.554503	0.587437	0.565213	0.606855	0.698549	0.682274	0.718709	0.641769	0.625433	0.641573	0.63997	0.646141	0.732018	0.717631	0.765064	0.871529	0.873029	0.931933	0.904574	0.952772	0.896804	0.915771	0.908777	0.910473	0.907593	0.894329	0.917504	0.897688	0.965913	0.993104	1.00899	1.01218	1.02255	1.02081	0.972878	0.946368	0.926079	0.949282	0.97839	1.02215	0.979681	0.962286	0.98781	0.967953	0.995068	0.961455	0.940165	0.929148	0.911246
1.99084	1.75262	1.56531	1.57189	1.60365	1.53243	1.58584	1.64311	2.62717	1.66539	2.72472	1.60104	1.54458	1.4684	1.43473	1.57785	1.70509	1.69012	1.62803	1.66384	2.17928	1.50349	1.46551	1.63278	1.69632	1.45283	1.75027	1.77167	2.00653	2.05278	2.02901	2.00578	1.8605	1.8402	1.64874	1.51336	1.28866	1.33552	1.33417	1.29826	1.25935	1.20499	1.21804	1.30683	1.48093	1.59272	1.6194	2.05142	2.10395	1.56227
0.569047	0.613222	0.645741	0.60214	0.649229	0.704308	0.688862	0.638254	0.656081	0.616874	0.682148	0.633837	0.627509	0.597949	0.67802	0.667131	0.671313	0.675547	0.67296	0.664819	0.701962	0.734789	0.715995	0.729625	0.723631	0.75717	0.719199	0.70196	0.705751	0.715036	0.70765	0.705025	0.692147	0.686028	0.689963	0.679177	0.65403	0.634473	0.618901	0.617215	0.631069	0.615364	0.606061	0.584752	0.613598	0.626971	0.647993	0.65762	0.679633	0.70317
1.44452	1.40603	1.37777	1.48474	1.57436	1.65195	1.67821	1.70669	1.70262	1.69497	1.71669	1.78331	1.78299	1.78267	1.78235	2.04689	2.07778	2.2815	2.10116	1.94725	1.99341	1.66455	1.73503	1.84345	2.08773	1.98707	1.97951	1.87223	1.89834	1.87405	1.82713	1.79523	1.74768	1.76679	1.66376	1.7177	1.72771	1.70306	1.73258	1.76333	1.72025	1.71247	1.72701	1.49436	1.44682	1.45164	1.54933	1.55901	1.54547	1.4995
0.50376	0.50345	0.562634	0.609737	0.638534	0.732146	0.616166	0.715141	0.609374	0.685427	0.652492	0.647453	0.730597	0.753257	0.755845	0.748633	0.788117	0.787176	0.740003	0.79453	0.906654	0.945605	0.994693	1.04772	1.00222	0.982742	1.01558	1.07791	1.29506	1.173	1.17122	1.19096	1.38511	1.3367	1.34227	1.3934	1.34874	1.41518	1.32414	1.41017	1.48949	1.6766	1.64614	1.59784	1.55208	1.41281	1.37406	1.33125	1.33139	1.33551
0.591031	0.602031	0.61367	0.611366	0.618228	0.635208	0.693013	0.762394	0.788772	0.817041	0.849392	0.88441	0.913055	0.918631	0.903066	0.963515	0.944775	0.905739	0.919024	0.946058	0.909086	0.874895	0.858796	0.904972	0.944214	0.898822	0.909258	0.977226	0.876016	0.940715	0.969999	0.982676	0.991735	0.936777	0.958239	0.983509	1.01612	1.00982	0.938136	0.942334	0.958061	0.928162	1.01571	1.04077	1.03739	1.05283	1.0672	1.03862	1.01152	0.985803
2.97476	2.90725	3.05418	3.13209	3.06704	2.93517	2.84184	2.79323	2.80673	2.77635	2.68489	2.71706	2.6537	2.59322	2.6285	2.73172	2.84338	2.78972	2.76629	2.73005	2.63063	2.64116	2.55538	2.52795	2.51366	2.4986	2.49926	2.55223	2.55958	2.54803	2.46292	2.4142	2.40184	2.43418	2.48157	2.48006	2.50491	2.5393	2.60258	2.62699	2.54869	2.49213	2.48533	2.4222	2.41949	2.40968	2.56418	2.69116	2.66748	2.53772
0.687846	0.644903	0.642429	0.636422	0.634189	0.656323	0.648789	0.676711	0.662655	0.670405	0.669904	0.683714	0.692583	0.691134	0.650254	0.655063	0.718988	0.711483	0.768902	0.680989	0.72362	0.767856	0.708011	0.805687	0.839053	0.881683	0.876633	0.874353	0.893909	0.956296	0.844896	0.90702	0.82193	0.797677	0.824858	0.81523	0.819067	0.771094	0.695952	0.739384	0.745051	0.800179	0.75511	0.782466	0.770668	0.782412	0.740221	0.774789	0.791551	0.729407
1.17081	1.12464	1.08599	1.06069	1.05533	1.05913	1.02761	1.21607	1.09092	1.0813	1.1227	1.14928	1.14981	1.19294	1.06632	1.09675	1.06634	1.09581	1.07941	1.07492	1.11115	1.19515	1.20367	1.21232	1.22883	1.24579	1.26323	1.28116	1.22458	1.17278	1.12519	1.1854	1.25243	1.23555	1.19089	1.29395	1.33097	1.3103	1.33319	1.32005	1.30717	1.29453	1.28214	1.26998	1.25805	1.25607	1.25411	1.25215	1.25152	1.29252
6.2747	6.58176	7.46043	7.60876	7.76311	7.92386	12.3779	13.6315	14.6996	7.37121	9.23722	9.04296	10.1752	16.606	15.4942	9.37402	12.6109	13.1104	21.7968	15.1247	21.6131	14.4961	14.4553	14.6505	23.0373	23.3709	24.5355	20.7157	18.8157	17.235	13.2229	11.6194	10.3035	10.9611	8.59879	6.67819	4.02489	3.3889	3.08226	2.31933	1.94414	1.4235	1.31689	1.34335	1.37183	1.39824	1.40971	1.48763	1.94113	3.02333
												2.09817	1.58494	1.64723	1.68314	1.72065	1.78255	1.78708	1.81487	1.86283	1.99499	2.05786	2.33255	2.37258	2.20669	2.1166	2.1147	1.99247	1.93785	2.00856	1.95991	1.98725	1.88624	1.88141	1.74775	1.70276	1.61793	2.02538	1.50528	1.54465	1.59124	1.60162	1.6333	1.67813	1.68737	1.63479	1.58751	1.62604	1.57343
1.09597	1.1353	1.13632	1.00584	1.08975	1.05963	1.05651	1.07917	1.11225	1.16334	1.16944	1.17616	1.19745	1.19665	1.14768	1.35789	1.32457	1.3973	1.32629	1.33977	1.38723	1.27707	1.30003	1.32382	1.41757	1.41968	1.40019	1.37356	1.37963	1.38575	1.39825	1.38213	1.43605	1.43076	1.42552	1.42031	1.40007	1.38039	1.36126	1.37575	1.39056	1.37623	1.36219	1.36108	1.35997	1.35701	1.35405	1.31895	1.30559	1.30625
1.43392	1.44918	1.39857	1.49281	1.61032	1.59686	1.68625	1.67131	1.66866	1.56356	1.54387	1.54398	1.54112	1.56043	1.55604	1.80398	1.95876	1.97361	1.99669	1.93615	1.86824	1.78273	1.75072	1.7717	1.84588	1.96684	1.85555	1.88375	1.95334	2.07908	2.05397	1.96884	1.66304	1.74925	1.84916	1.83036	1.81194	1.74542	1.69928	1.75252	1.7896	1.75606	1.7844	1.73815	1.76355	2.03246	2.06111	1.1249	0.773542	0.675795
0.650114	0.622458	0.74165	0.729723	0.637712	0.589026	0.607005	0.530947	0.616528	0.735	0.791266	0.803534	0.816188	0.829247	0.84273	0.849795	0.929733	0.870578	0.974986	1.13288	1.35179	1.22871	1.12616	1.03942	0.965081	1.17194	1.11458	1.06257	1.01519	1.0643	0.971306	1.03554	0.983535	0.913319	0.880213	1.04369	1.11482	1.1158	0.962291	1.03865	1.0264	1.33986	1.24514	1.16293	1.01163	1.00418	1.21635	1.54218	1.85177	1.4244
1.09971	1.15017	1.1506	1.17665	1.15853	1.18166	1.18242	1.12456	1.09635	1.10741	1.08969	1.09128	1.14958	1.26023	1.3394	1.40248	1.42663	1.4588	1.48522	1.41312	1.5254	1.54228	1.57005	1.57378	1.50347	1.49271	1.46254	1.4715	1.49797	1.48063	1.45387	1.43718	1.47315	1.50773	1.54691	1.57112	1.53131	1.52475	1.51583	1.50702	1.56465	1.55616	1.5187	1.5398	1.56299	1.58735	1.61002	1.68418	1.68115	1.71868
1.30686	1.23845	1.14241	1.17024	1.14049	1.04101	1.02706	1.00666	1.00116	1.26697	1.05148	0.898642	0.784595	0.696236	0.625764	0.568247	0.645586	0.747294	0.807896	0.92443	1.08025	1.15373	1.23793	1.09553	1.14415	1.17098	1.23911	1.31566	1.4023	1.51626	1.19794	1.38017	1.41579	1.53023	1.27958	1.19696	1.16383	1.18291	1.18276	1.28743	1.41242	1.1777	1.20788	1.26977	1.32226	1.32463	1.33455	1.38052	1.38952	1.42623
2.14399	1.91075	1.55305	1.24443	1.0906	0.970619	0.884548	0.795005	0.852213	0.862106	0.872231	0.882597	0.893212	0.904085	0.932084	0.961872	0.993628	1.14719	1.35691	1.33326	1.31042	1.38962	1.479	1.58068	1.69737	1.83266	1.80789	1.78379	1.76031	1.73745	1.71517	1.69346	1.67228	1.65164	1.71469	1.60645	1.55431	1.58758	1.64715	1.51107	1.52024	1.55653	1.87244	1.74538	1.87044	1.71985	1.73389	1.7012	1.77371	1.71981
0.572472	0.668399	0.58463	0.633532	0.763313	0.959965	0.994693	1.054	0.898053	0.90303	0.864257	0.857428	0.850707	0.727001	0.850112	0.906198	0.969266	1.07178	1.12913	1.06773	1.09157	1.06276	0.954746	1.04247	0.965858	1.06549	1.08074	1.13155	1.08438	1.1365	1.10622	1.07025	1.16072	1.18816	1.12846	1.09107	1.0925	1.29935	1.09547	1.08264	1.14576	1.11495	1.08581	1.16261	1.16885	1.13753	1.16154	1.09098	1.0285	0.987158
																							1.07423	1.16195	1.20596	1.32904	1.2912	1.16043	1.05371	0.964964	1.37468	2.38905	2.37649	2.66036	2.6512	2.17448	2.37745	2.51671	2.04004	2.46135	2.79913	2.8773	3.2408	3.03172	2.6901	2.99981	2.94138	2.69562	2.04876
																																												1.4607	1.49222	1.62043	1.75365	1.91073	2.09872
0.781366	0.768707	0.766539	0.808321	0.806389	0.774925	0.759217	0.761182	0.763157	0.769241	0.833616	0.818687	0.760277	0.799874	0.823927	0.824531	0.829528	0.861466	0.871291	0.90501	0.951881	0.956837	0.975044	0.98618	0.994722	1.14729	1.18805	1.14327	1.1897	1.19444	1.22403	1.22907	1.22694	1.27832	1.29607	1.24535	1.20458	1.19886	1.21594	1.21075	1.2484	1.23934	1.24876	1.26964	1.25063	1.22334	1.2576	1.26994	1.28751	1.28457
1.10147	1.0763	1.11906	1.1461	1.18746	1.14135	1.05139	0.938965	0.899861	0.922575	1.00891	1.116	1.29991	1.48764	1.28269	1.21071	1.23481	1.02835	0.908582	0.86081	1.00398	1.04966	0.894112	0.920267	0.877697	0.975484	0.928438	1.00793	1.1691	1.27539	1.30466	1.30197	1.28365	1.26583	1.29942	1.23759	0.992423	0.908596	0.958096	1.05218	1.1819	1.33766	1.28791	1.40925	1.479	1.27554	1.20621	1.02731	1.26863	1.27438
1.02577	0.894432	0.970036	0.956564	0.950501	0.906433	0.905147	0.903865	0.990211	0.935727	0.961473	0.968948	1.00225	1.00657	0.982869	1.09921	1.15735	1.14629	1.24222	1.17452	1.24539	1.23508	1.23867	1.22798	1.21659	1.20728	1.27122	1.19476	1.18656	1.17847	1.17153	1.13531	1.13434	1.06605	1.00551	0.951472	0.90295	0.912942	0.811883	0.841584	0.847632	0.850637	0.931162	0.973075	0.947203	0.873147	0.833994	0.74728	0.721138	0.867985
1.67265	1.72967	1.62799	1.61066	1.60227	1.4656	1.39028	1.40875	1.40063	1.39261	1.39508	1.45425	1.45968	1.46514	1.45003	1.526	1.62477	1.62135	1.6373	1.74229	1.77981	1.7018	1.63035	1.7743	1.62893	1.50558	1.51843	1.53151	1.54481	1.55835	1.57213	1.46833	1.37739	1.44367	1.44222	1.44077	1.45228	1.46397	1.3387	1.43056	1.44845	1.46679	1.4856	1.50489	1.55234	1.53683	1.55362	1.57079	1.58834	1.56517
			0.948045	0.964728	0.951931	0.915418	0.886447	0.877366	0.957519	0.967234	0.989372	1.01255	1.04408	1.11773	1.20257	1.26664	1.29435	1.32331	1.32407	1.32484	1.34887	1.33517	1.40117	1.39262	1.34997	1.37109	1.39287	1.36772	1.34206	1.31834	1.27716	1.22867	1.20148	1.09917	1.09963	1.139	1.14599	1.30785	1.24406	1.143	1.13999	1.11097	1.13732	1.13111	1.12497	1.18713	1.20421	1.17815	1.18468
					1.33467	1.44543	1.29803	1.10343	1.16995	1.16505	1.08342	0.98649	0.953644	1.31379	2.11104	5.36924	5.36622	5.36809	5.24604	5.04432	4.91506	4.77237	4.74116	4.86623	4.99808	5.13727	4.96969	5.33715	5.22734	5.17481	5.337	5.13675	5.00347	4.98696	4.87185	4.94996	4.76473	4.71682	4.5755	4.5933	4.64239	4.52512	4.42863	4.32597	4.31084	4.35776	4.35612	4.45553	4.24826
							2.10153	1.53331	1.53373	1.44645	1.49535	1.71727	1.82114	1.9233	1.99472	1.98341	2.12806	2.0654	2.08019	1.99164	1.99838	1.87618	1.78021	1.77611	1.61075	1.55311	1.58138	1.33095	1.29463	1.31158	1.18189	1.08817	1.09592	1.13009	1.07693	0.829533	0.674566	0.811756	0.831739	0.836823	0.870177	0.857576	0.826126	0.848612	0.805703	0.856622	0.907522	0.941595	0.957605
							1.09802	1.06823	1.06423	1.0186	1.02076	1.05886	1.12543	1.26842	1.3073	1.3417	1.28293	1.37778	1.50266	1.4543	1.48909	1.64725	1.51958	1.41027	1.39887	1.43954	1.42	1.55497	1.57818	1.7108	1.69166	1.70948	1.78345	1.63681	1.78361	1.87858	1.74982	1.59632	1.60808	1.55918	1.51316	1.62299	1.64361	1.69492	1.74662	1.85359	1.97451	2.07689	2.19048
									0.846803	0.664017	0.546132	0.545167	0.558151	0.602921	0.702056	0.763654	0.841166	0.954936	0.950243	0.874684	0.986928	0.964817	0.994053	0.942497	1.00042	1.03215	1.00207	0.959075	0.923827	0.907129	0.880348	0.885772	0.822429	0.808306	0.751774	0.732132	0.699286	0.678054	0.665122	0.669235	0.73255	0.745065	0.758015	0.771424	0.785315	0.799716	0.814655	0.839067	1.06949
													1.04457	1.86742	8.79788	13.4571	15.4333	5.62082	5.60484	5.15388	12.649	11.3441	12.5276	12.176	15.241	16.3084	16.301	15.6193	15.5764	6.6207	17.6952	18.4534	17.8824	16.382	17.0144	15.7025	15.7725	16.0628	14.6158	13.6975	14.1662	12.9675	10.2362	9.63604	11.1831	11.5069	11.6178	11.972	12.1365
															0.504906	0.53085	0.615738	0.581022	0.594135	0.573595	0.554428	0.573189	0.600291	0.565388	0.609836	0.661868	0.647375	0.669901	0.675748	0.694289	0.747172	0.677126	0.765846	0.694973	0.812402	0.811741	0.811082	0.787047	0.818595	0.761082	0.797972	0.746902	0.797785	0.856106	0.861384	0.864554	0.860772	0.857023	0.8665
																																			0.773021	0.782226	0.830498	0.757078	0.783094	0.770437	0.710196	0.743784	0.733801	0.687451	0.628957	0.639993	0.681347	0.674198	0.683342
														1.06654	1.08804	1.00593	0.968284	0.933355	0.923582	0.940993	0.97156	0.99284	0.969737	1.05037	1.09143	1.13345	1.1683	1.27375	1.27289	1.25728	1.26931	1.2258	1.3198	1.37756	1.30675	1.22813	1.37005	1.3963	1.38478	1.45606	1.42602	1.43609	1.39668	1.45869	1.43284	1.41042	1.44015	1.459	1.47112
														1.99949	2.10352	2.14096	2.09833	2.02033	2.04136	2.02902	1.99132	1.9276	1.91666	1.95753	1.93435	1.8555	1.82986	1.80491	1.81039	1.78457	1.81162	1.81751	1.82344	1.75428	1.77452	1.79523	1.81643	1.82757	1.83885	1.85026	1.86182	1.87352	1.89737	1.92184	1.87348	1.82749	1.7837	1.74197	1.75609
															1.12112	1.10928	1.1174	1.16508	1.12211	1.09233	1.15455	1.19214	1.16299	1.20324	1.16817	1.14059	1.1105	1.17591	1.20281	1.19629	1.25783	1.25167	1.16665	1.11762	1.13622	1.24352	1.25695	1.29773	1.41532	1.46499	1.48152	1.51887	1.48627	1.46275	1.53139	1.45722	1.47672	1.48945	1.42897
																				1.06037	1.10327	1.05295	1.07648	1.08277	1.14111	1.10267	1.19793	1.17116	1.19658	1.20551	1.12452	1.20532	1.19551	1.10849	1.082	1.0953	1.17564	1.10246	1.18703	1.2317	1.25626	1.24376	1.23415	1.24215	1.23759	1.28595	1.30744	1.33787	1.3779
																																									0.636845	0.65709	0.678665	0.701704	0.674692	0.675683	0.687946	0.700663	0.713858
																													1.67439	1.66947	1.60455	1.76353	1.76318	1.65086	1.55199	1.56073	1.50079	1.3678	1.36778	1.36775	1.41256	1.41695	1.47343	1.35877	1.30621	1.14943	1.05792	1.07897	1.05986
																																							0.766575	0.759452	0.789743	0.859567	0.89082	0.842678	0.799473	0.825792	0.845679	0.768557	0.749778
																																							1.32705	1.29866	1.27055	1.28701	1.23617	1.26992	1.29712	1.34609	1.26418	1.27817	1.32767
																																							1.1306	1.19276	1.21794	1.19911	1.22497	1.13299	1.17689	1.26632	1.53129	1.54312	1.62229
																																														0.740743	0.669055	0.681534	0.65402
																																															1.50555	1.47552	1.49985
1.0957	0.996987	0.914589	0.844771	0.784856	0.800033	0.748473	0.694322	0.726335	0.780371	0.77282	0.739196	0.781906	0.760939	0.816959	0.884521	0.823195	0.999885	0.91611	0.850231	0.793432	0.738145	0.69006	0.597672	0.622042	0.716266	0.863894	1.03154	1.10151	1.2612	1.13525	0.938643	1.10503	1.12005	1.1108	1.35717	1.14545	1.37099	1.26791	1.27611	1.27344	1.32682	1.34425	1.38654	1.34655	1.35093	1.34488	1.31543	1.35535	1.39786
0.570325	0.59597	0.591136	0.603988	0.587764	0.606257	0.61295	0.62688	0.647796	0.657212	0.638274	0.631281	0.60329	0.601216	0.585758	0.649496	0.749625	0.72079	0.656749	0.663198	0.620304	0.601394	0.582126	0.521023	0.512469	0.523928	0.519787	0.528744	0.532739	0.545405	0.551792	0.538186	0.536354	0.528361	0.528039	0.537611	0.536036	0.561411	0.597534	0.63103	0.644836	0.650602	0.665228	0.667658	0.685742	0.691829	0.714884	0.691462	0.670926	0.670625
1.17091	1.17235	1.14813	1.1548	1.22677	1.25016	1.31022	1.16361	1.1666	1.15391	1.12603	1.16586	1.25079	1.33936	1.29859	1.39563	1.41096	1.45414	1.29732	1.20018	1.09893	1.08219	1.08072	1.0447	1.04608	0.993768	0.995867	0.932403	0.870094	0.876059	0.843585	0.853699	0.864562	0.833425	0.802066	0.731913	0.763581	0.805124	0.843203	0.883729	0.870497	0.866774	0.839568	0.806009	0.78057	0.774339	0.731032	0.73177	0.720595	0.752707
1.38381	1.48444	1.4712	1.46203	1.45298	1.46762	1.41829	1.37776	1.32069	1.31441	1.37502	1.33575	1.30949	1.31414	1.31152	1.26608	1.23976	1.21847	1.2996	1.29299	1.30548	1.16151	1.1863	1.16225	1.13258	1.11783	1.11749	1.19583	1.11107	1.28104	1.18459	1.23157	1.19393	1.21575	1.21167	1.39627	1.14511	1.13749	1.1371	1.16521	1.34694	1.22092	1.19639	1.16947	1.17836	1.1867	1.16769	1.2133	1.17385	1.21882
0.878154	0.83862	0.805526	0.799921	0.796201	0.772688	0.761349	0.774492	0.753892	0.775674	0.783414	0.783062	0.786498	0.799362	0.836029	0.892046	0.922016	0.935432	0.950203	0.933916	0.906945	0.848514	0.824788	0.798428	0.797237	0.759828	0.720709	0.723502	0.737555	0.761096	0.743321	0.756555	0.762347	0.759518	0.749177	0.770693	0.763931	0.758206	0.772628	0.77221	0.790401	0.822555	0.801697	0.828534	0.804998	0.835868	0.822299	0.840366	0.86356	0.846979
0.882853	0.868224	0.865739	0.887265	0.91507	0.931712	0.990721	1.01812	1.06423	0.949107	1.0007	1.01019	0.985117	0.947468	0.927951	1.0136	1.06261	1.12143	1.17456	1.23647	1.25907	1.28252	1.20534	1.11511	1.06047	1.00598	0.977649	0.972673	0.967748	0.952229	0.887497	0.8893	0.732337	0.849294	0.912564	1.02151	0.953829	1.04244	0.977122	1.06379	1.03479	1.05456	1.0524	1.08175	1.14953	1.15593	1.09327	1.14994	1.14205	1.06832
																																																12.4394	11.963
1.12373	1.11706	1.16553	1.17719	1.18908	1.20122	1.20975	1.20544	1.15434	1.15454	1.15474	1.20056	1.18899	1.12868	1.1171	1.18192	1.27089	1.27558	1.29321	1.25115	1.27441	1.24107	1.18079	1.17893	1.16749	1.21634	1.29488	1.2478	1.29625	1.34614	1.38945	1.43397	1.40086	1.36894	1.41663	1.50812	1.56024	1.53718	1.54735	1.38954	1.37611	1.39444	1.3749	1.29245	1.27059	1.38972	1.27176	1.291	1.31082	1.33127
																1.2537	1.24699	1.23831	1.24994	1.26225	1.28607	1.35199	1.36054	1.34769	1.32543	1.30262	1.32966	1.3418	1.36077	1.37493	1.35121	1.34919	1.27267	1.2406	1.23082	1.22102	1.20292	1.20931	1.207	1.2737	1.26152	1.22417	1.2106	1.16497	1.19101	1.2011	1.2047	1.20024	1.18432
1.16811	1.14287	1.09148	1.11065	1.11506	1.13404	1.17921	1.19391	1.19459	1.17529	1.11878	1.08632	1.05569	1.06509	1.06988	1.15545	1.22123	1.22713	1.29132	1.28727	1.32374	1.32247	1.33406	1.38339	1.37847	1.38514	1.38769	1.39024	1.38097	1.36161	1.34806	1.34944	1.32826	1.30597	1.2859	1.33244	1.3606	1.33842	1.2449	1.22151	1.24503	1.32444	1.32206	1.33078	1.32734	1.27019	1.23347	1.2079	1.21059	1.16862
1.33821	1.34013	1.45148	1.2747	1.21167	0.991628	1.01041	0.980098	1.02668	1.12823	1.16684	1.20393	1.16382	1.11709	1.02573	1.04941	1.03795	1.06916	1.05656	1.07278	1.09855	1.10336	1.30025	1.30858	1.34473	1.31205	1.34334	1.35631	1.38498	1.46402	1.51509	1.49986	1.48492	1.53732	1.49703	1.50151	1.50601	1.45159	1.5322	1.56953	1.65602	1.56735	1.56196	1.73206	1.50142	1.54696	1.78529	1.61116	1.69116	1.85947
0.632608	0.590395	0.553462	0.551941	0.514692	0.548994	0.582808	0.576245	0.572696	0.582306	0.544495	0.537807	0.550032	0.571947	0.604102	0.626939	0.638301	0.687818	0.723051	0.735418	0.744676	0.745157	0.75076	0.739606	0.759729	0.772356	0.768615	0.769824	0.818423	0.818395	0.946712	0.8723	0.901165	0.901403	0.897545	0.899568	0.95043	0.973011	0.950797	0.94756	0.939947	0.94726	0.951566	0.954765	0.923999	0.916959	0.902107	0.889754	0.928355	0.967649
0.987593	1.00901	1.04535	1.12929	1.16006	1.09656	1.07372	1.0394	1.0572	1.04378	1.04038	1.0046	0.970472	0.989125	0.974215	1.01307	0.9823	1.00115	1.05426	1.14746	1.17895	1.07475	1.01905	0.963123	0.889154	0.855384	0.824085	0.773012	0.802903	0.837143	0.832661	0.853232	0.867982	0.89729	0.916876	0.949388	0.954405	0.99672	1.0366	1.05792	1.00438	0.971497	0.959779	0.978103	0.979316	0.999485	0.985871	0.928541	0.891141	0.887789
1.5873	1.53438	1.54407	1.60691	1.59584	1.61011	1.48881	1.83658	2.39633	2.23681	2.07883	2.23901	1.93113	2.509	2.36348	2.3225	2.33528	2.37681	2.46999	2.51523	2.54569	2.6112	2.63707	2.7106	2.68059	2.71166	2.74293	2.75924	2.7378	2.78232	2.89591	2.89699	2.89807	2.89915	2.88589	2.87275	2.85973	2.889	2.99207	2.91711	2.88257	2.99141	3.01766	3.09113	2.94946	2.85933	2.87086	2.88248	2.90399	2.92583
1.20903	1.17468	1.1637	1.2017	1.20296	1.28382	1.32836	1.35383	1.35709	1.36036	1.36365	1.33891	1.31505	1.29191	1.26956	1.2641	1.28305	1.27374	1.26899	1.33576	1.31729	1.29035	1.26449	1.22603	1.20743	1.18758	1.17311	1.11948	1.11778	1.12165	1.13706	1.12173	1.1141	1.07321	1.03521	1.01433	1.00198	1.00311	0.984559	0.969129	0.973685	0.978285	0.982928	0.971396	0.97242	0.977645	0.961749	0.917529	0.919811	0.922105
																															1.79518	1.80029	1.80542	1.81611	1.82692	1.83671	1.84257	1.84847	3.38485	3.45408	3.5262	3.60139	3.67986	3.76183	3.84753	3.93723	4.03121	3.86983	3.72087
0.889128	0.891982	0.802126	0.838333	0.826776	0.854417	0.949206	0.901648	0.858629	0.764569	0.71495	0.741866	0.770887	0.802271	0.776056	0.830201	0.843696	0.877468	0.911354	0.837415	0.787822	0.76235	0.75655	0.751295	0.788428	0.770755	0.747336	0.74001	0.763668	0.786937	0.811078	0.834334	0.912188	0.912318	0.99033	0.953664	0.923063	0.946094	0.950946	0.955848	0.853953	0.863677	0.835706	0.865994	0.850534	0.81945	0.764006	0.746825	0.765012	0.719675
1.07366	1.19825	1.20586	1.1688	1.16525	1.13249	1.06928	1.01958	0.996465	0.972706	0.934986	0.919581	0.918986	0.884078	0.89608	0.973525	1.03292	1.06748	1.09113	1.05996	1.03053	1.03285	0.988135	0.970445	0.958615	0.944706	0.939113	0.963624	0.939212	0.937821	0.948623	0.978715	1.07648	1.11166	1.14981	1.22517	1.24808	1.20234	1.22133	1.20233	1.21002	1.21781	1.20047	1.14598	1.12722	1.10907	1.09546	1.07905	1.05134	1.02503
																																														1.51474	1.51872	1.29344	1.31127
0.797421	0.799561	0.782159	0.878506	0.834346	0.840216	0.854425	0.861531	0.871863	0.876736	0.902713	0.920436	0.88383	0.89655	0.942915	1.04565	1.12091	1.17207	1.17984	1.23033	1.2073	1.20833	1.16548	1.17452	1.13367	1.11032	1.09776	1.07363	1.06969	1.0589	1.05657	1.02412	1.00549	1.00791	1.02635	1.02833	1.03032	1.03832	1.03849	0.994468	1.04067	1.0454	1.05018	1.02868	1.02103	1.03466	1.04443	1.00694	1.05145	0.994402
														1.17386	1.29439	1.44251	1.62891	1.27324	1.02883	0.822364	0.845353	0.869664	0.895414	0.945364	0.980134	1.01756	0.807958	0.669957	0.572221	0.555502	0.651147	0.786577	0.932333	1.02581	1.28973	1.74149	1.67073	1.44081	1.4853	1.1461	1.03738	0.96622	0.915906	0.941632	0.909914	0.938437	0.934621	0.922432	0.910556
0.819284	0.800602	0.809908	0.830475	0.869897	0.842133	0.864055	0.889965	0.903463	0.941391	0.954964	0.969803	0.969786	0.969177	0.985317	1.06043	1.12513	1.14832	1.1465	1.17251	1.14575	1.13086	1.10608	1.12201	1.10363	1.13037	1.08539	1.14549	1.11019	1.13691	1.13563	1.13824	1.11717	1.17063	1.13296	1.14857	1.12598	1.14583	1.28854	1.3636	1.37099	1.45274	1.50398	1.49575	1.4423	1.39254	1.63599	1.61321	1.67798	1.68965
0.908604	0.907459	0.954225	0.999964	1.05667	1.08713	1.12005	1.25996	1.40113	1.17255	1.11266	1.1269	1.14151	1.17824	1.20377	1.22449	1.2315	1.29363	1.2757	1.23945	1.28329	1.1816	1.09485	1.06894	0.983343	1.01286	1.02388	1.02084	1.02468	0.981176	0.941214	0.959618	1.01041	1.03027	1.02901	1.02374	0.930793	1.05275	0.991586	1.08184	1.09348	1.1091	1.05384	1.08144	1.03654	1.19059	1.04964	0.953499	1.01525	1.00839
1.15349	1.04068	1.15612	1.06969	0.919707	0.935861	1.05387	1.23594	1.57162	1.58045	1.58937	1.5716	1.59998	1.53566	1.56598	1.56819	1.65154	1.70947	1.70004	1.70449	1.43534	1.66258	1.63138	1.56372	1.59675	1.70288	1.69817	1.50302	1.82946	2.17364	1.4085	1.56443	1.75917	1.93137	1.95658	2.04052	2.08398	1.94	1.81463	1.77835	1.7683	1.75836	1.84538	1.94146	2.1369	2.16818	2.20039	2.23358	2.26778	2.30304
0.837283	0.835359	0.828421	0.853281	0.867494	0.854697	0.899045	0.935865	0.946629	0.944951	0.966143	1.00634	1.03178	1.04833	1.06541	1.08307	1.05386	1.02619	0.999937	1.06762	1.08854	1.08402	1.11648	1.15095	1.09535	1.04488	0.998855	0.819864	0.777522	0.739339	0.672064	0.647104	0.623931	0.619809	0.682569	0.672432	0.663775	0.658782	0.671337	0.588431	0.57147	0.596148	0.623053	0.652502	0.741372	0.733767	0.742448	0.727652	0.735872	0.744281
																																																0.635654	0.63237
1.07915	1.07246	1.19123	1.0011	0.978845	1.16129	1.2532	1.40021	1.42748	1.49642	1.42362	1.39336	1.28436	1.14423	0.996276	1.11954	1.05182	0.991819	0.926211	0.982637	0.944839	0.91592	0.874353	0.836395	0.801596	0.828052	0.894466	0.871379	0.849453	0.84464	0.877505	0.91303	0.951553	1.01074	0.943505	1.02337	0.986093	1.02207	1.03134	1.06674	1.05681	1.02955	1.06742	1.10818	1.12183	1.07839	1.11076	1.0412	1.00584	0.985796
1.49832	1.47532	1.32081	1.49311	1.51931	1.49439	1.42054	1.45453	1.4603	1.45007	1.59461	1.77116	1.64855	1.52384	2.00545	2.08788	1.92839	1.94649	1.93106	2.05517	2.19632	2.3583	2.54607	1.62459	1.9508	2.44094	2.61691	4.48678	4.36438	3.38583	3.80996	2.52872	2.84667	2.77316	2.75119	2.13434	2.15104	2.38228	2.19062	2.32099	2.27531	2.30572	2.85405	2.69673	2.81492	2.94395	2.61218	2.59175	2.75234	2.24708
	0.708166	0.710143	0.71563	0.736902	0.743826	0.755597	0.782338	0.792567	0.818803	0.815146	0.81525	0.805749	0.807643	0.82671	0.861419	0.894461	0.930139	0.968782	1.01078	0.970247	0.946861	0.944013	0.926028	0.892301	0.85587	0.854883	0.845822	0.807781	0.812551	0.79177	0.812109	0.808109	0.844534	0.849306	0.85527	0.842148	0.821565	0.784584	0.765049	0.775779	0.844404	0.799967	0.793174	0.786495	0.803104	0.82043	0.83852	0.857426	0.877204
	1.1835	1.08985	1.11466	1.14124	1.08502	1.12762	1.16871	1.21291	1.26058	1.25672	1.21953	1.18447	1.15138	1.11055	1.19405	1.22844	1.26488	1.30355	1.2733	1.34147	1.32612	1.31242	1.31333	1.31917	1.33129	1.33915	1.34618	1.35088	1.3491	1.36117	1.48284	1.41574	1.37287	1.44459	1.47604	1.33701	1.45443	1.43208	1.43542	1.43595	1.44489	1.46683	1.49168	1.48796	1.49036	1.52056	1.46577	1.45456	1.47918
																																												1.00998	1.07847	1.10628	1.13944	1.17466	1.14595
	0.731204	0.693719	0.6621	0.655881	0.656335	0.676511	0.678841	0.677996	0.699444	0.71239	0.696403	0.688313	0.693046	0.700859	0.731024	0.726842	0.756856	0.764437	0.766706	0.765248	0.781026	0.770534	0.775767	0.786481	0.794115	0.830248	0.838985	0.896875	0.936452	0.946775	0.957328	0.963914	0.986399	1.01461	1.00877	1.02025	1.01782	1.00982	0.99176	0.992916	0.995962	1.01114	1.00281	0.992749	0.993988	1.02281	1.02161	1.03764	1.04368
		1.07415	1.00857	1.04898	1.01019	1.06118	1.02339	1.03929	1.07146	1.06029	1.04777	1.05606	1.05487	1.00834	0.99908	1.08648	1.05708	1.02571	1.22014	1.35449	1.05708	1.02629	1.00177	0.991422	1.00459	1.04497	1.041	1.09857	1.1338	1.14401	1.14498	1.1372	1.1882	1.1745	1.18492	1.21443	1.21144	1.20863	1.22215	1.13941	1.10256	1.05705	1.06409	1.02645	1.00251	1.0095	0.992681	0.964284	0.995423
		1.16963	1.20553	1.24331	1.22683	1.21199	1.28047	1.27952	1.28217	1.26507	1.24077	1.28143	1.35735	1.2837	1.28058	1.27602	1.25935	1.28289	1.2351	1.24371	1.25915	1.25566	1.18783	1.18899	1.16941	1.1507	1.1313	1.12257	1.11865	1.09066	1.04831	1.02154	1.00574	1.00632	1.00689	1.01448	1.02219	1.03002	1.07979	1.07141	1.06315	1.05502	1.07258	1.07631	1.08007	1.08386	1.10674	1.11025	1.08507
		0.850995	0.887542	0.926364	0.936346	0.964311	0.933853	1.03827	0.939225	0.974178	0.963413	0.966144	0.926237	0.99934	1.02357	1.049	1.07572	1.0915	1.10774	1.11786	1.12816	1.10834	1.14317	1.10957	1.14332	1.14524	1.14716	1.14909	1.15103	1.15298	1.25027	1.27024	1.23534	1.12721	1.18456	1.13774	1.13319	0.988327	1.14719	1.07357	1.10876	1.14633	1.13084	1.11577	1.16025	1.16982	1.09471	1.15592	1.05623
			1.14802	0.970672	1.12145	1.04646	1.14408	1.21055	1.19212	1.17423	1.14041	1.10849	1.0783	1.04971	1.06508	1.0809	1.09721	1.14034	1.1802	1.174	1.15903	1.14443	1.1302	1.1483	1.14582	1.14545	1.12409	1.10876	1.05899	1.08303	1.04342	1.06674	1.0477	1.0134	1.0517	1.05605	1.01743	1.01889	0.953765	0.994358	0.986007	0.997703	1.01865	1.0743	1.11312	1.12982	1.13379	1.13861	1.09217
			0.877335	1.05762	0.911435	0.978261	1.05566	1.07322	1.0754	1.05543	1.16659	1.05648	1.17139	1.19722	1.20069	1.29225	1.43577	1.37398	1.2989	1.27734	1.27215	1.27083	1.26093	1.25639	1.23911	1.31121	1.25757	1.30611	1.37577	1.35053	1.33579	1.33507	1.33241	1.36573	1.34046	1.33002	1.39023	1.33683	1.35783	1.33112	1.34526	1.36233	1.40689	1.44572	1.39406	1.4454	1.48605	1.39236	1.4311
			0.963011	1.00578	1.00657	1.04261	1.08223	1.07565	1.0786	1.31512	1.18537	1.07893	1.23881	1.01765	1.00142	1.03565	1.04791	0.999401	1.03869	1.02713	1.06638	1.10876	1.15465	1.07352	1.06605	0.957374	0.999593	0.970629	0.946574	0.956224	0.9418	0.98846	0.932911	0.940184	0.915163	0.89144	0.876497	0.830852	1.02533	1.02272	1.02011	1.02115	1.01481	1.04719	1.0285	1.01046	0.972908	0.978682	0.808429
			1.01173	0.999791	1.06284	1.04126	1.00954	0.979694	0.951562	0.925	0.899881	0.957432	1.02285	1.09786	1.28134	1.44615	1.52877	1.5471	1.39572	1.21155	1.22569	1.25598	1.2393	1.22221	1.18479	1.15978	1.18491	1.13017	1.12433	1.16864	1.20458	1.25179	1.1798	1.21307	1.24828	1.21495	1.2099	1.27766	1.28971	1.32669	1.28592	1.31809	1.3222	1.28865	1.27347	1.30896	1.33197	1.34143	1.25785
				0.871355	0.84029	0.811363	0.829305	0.848058	0.867679	0.852266	0.837391	0.818038	0.772418	0.689189	0.66088	0.722093	0.749597	0.760356	0.813656	0.742099	0.726727	0.771049	0.725515	0.723294	0.710575	0.763696	0.816216	0.876493	0.874195	0.857276	0.839705	0.848895	0.80692	0.825642	0.845253	0.87724	0.888413	0.804306	0.853514	0.758364	0.748175	0.701389	0.732817	0.750148	0.753364	0.7323	0.718243	0.718368	0.70111
				1.07707	1.05105	1.05834	1.04803	1.04693	1.06784	1.07611	1.05971	1.0438	1.08135	1.14126	1.20818	1.24234	1.27847	1.31678	1.29999	1.30769	1.31299	1.31834	1.32373	1.36085	1.35574	1.35067	1.42415	1.42212	1.41681	1.40825	1.41246	1.41669	1.40794	1.39455	1.41011	1.46005	1.44763	1.4298	1.40337	1.36591	1.28438	1.30234	1.27297	1.32141	1.36069	1.38685	1.37553	1.4219	1.39968
																																									1.48511	1.55692	1.55419	1.4879	1.56616	1.51637	1.605	1.68052	1.72704
							1.0372	1.33089	1.30459	1.33571	1.30271	1.28952	1.33895	1.25801	1.31374	1.3152	1.29978	1.24874	1.1918	1.10704	1.05187	1.00193	1.07412	1.18739	1.16619	1.21837	1.25011	1.24058	1.25452	1.29614	1.25354	1.19935	1.14965	0.957541	0.995977	0.943049	0.96913	0.939011	0.946329	0.953761	0.918014	0.898915	0.897056	0.912369	0.911759	0.929988	1.02042	1.02949	0.981781
							1.02339	0.974464	0.967788	0.946846	0.964047	0.981884	1.00039	1.01962	1.03959	1.05413	1.0181	0.984452	0.952955	0.9306	0.949395	0.998044	0.998441	0.942232	0.921525	0.952192	0.98497	0.969575	0.982386	0.995539	1.00492	1.07668	1.08317	1.09344	1.10391	1.05873	1.04023	1.02236	1.0197	1.02226	1.06857	1.10418	1.07436	1.08905	1.10416	1.10298	1.10181	1.10064	1.08276
											0.826053	0.854648	0.852004	0.848698	0.896294	0.951601	0.964587	0.934656	0.939018	0.959704	0.964782	0.960561	0.983573	0.995873	0.977094	1.0052	1.00568	0.999468	1.0086	1.00696	1.01075	1.0104	0.990921	0.974692	0.970131	0.965613	0.966476	0.97045	0.892818	0.985005	0.909143	1.00697	0.926775	1.00959	0.995809	0.935379	0.98116	0.98241	1.00895
													1.30235	1.60178	1.1796	1.26476	1.36317	1.47819	1.61441	1.557	1.49112	1.43059	1.37478	1.52409	1.95479	1.77538	1.67831	1.70385	1.73018	1.75733	1.78536	1.87914	1.86849	1.86806	1.90319	1.94624	1.54181	1.6135	1.34054	1.4551	1.28595	1.56122	1.71478	1.48464	1.65762	1.67036	1.68329	1.68283	1.2355
													1.28738	1.32323	1.49529	1.60761	1.68963	1.66064	1.63262	1.49983	1.52573	1.46026	1.31601	1.40234	1.41072	1.38182	1.25447	1.29943	1.32524	1.3521	1.38008	1.41485	1.38936	1.36974	1.42835	1.46436	1.50223	1.54211	1.58417	1.59591	1.60783	1.74426	1.90599	1.81188	1.96437	1.84153	1.70713	2.35038	1.82476
															0.69015	0.59961	0.604072	0.611738	0.569352	0.582753	0.547021	0.521784	0.52086	0.531852	0.528717	0.546203	0.564164	0.563193	0.579773	0.597358	0.599328	0.626158	0.612843	0.616026	0.722505	0.640666	0.649066	0.666851	0.673831	0.695016	0.713744	0.747896	0.704688	0.714793	0.735334	0.737641	0.758439	0.743584	0.895214
																1.4912	1.57331	1.74775	1.75836	1.72851	1.69965	1.56547	1.56474	1.48469	1.48569	1.42456	1.42166	1.33269	1.37134	1.334	1.37346	1.48787	1.4555	1.45143	1.36045	1.41052	1.45244	1.47266	1.54605	1.58327	1.47169	1.51281	1.31323	1.40528	1.38368	1.26683	1.22433	1.22201	1.23366
																			0.842576	0.888614	0.80778	0.797116	0.831423	0.982829	0.914681	0.871409	0.886838	0.863028	0.840464	0.819049	0.798698	0.803733	0.832234	0.857406	0.868248	0.879368	0.890776	0.902484	0.914503	0.926848	0.93953	0.952564	0.965964	0.847144	0.754353	0.679882	0.618795	0.669027	0.690163
																				0.80672	0.669107	0.785358	0.950497	0.982142	0.962203	0.943057	0.920612	0.876409	0.839632	0.823289	0.807571	0.792306	0.792307	0.748842	0.74105	0.720097	0.729337	0.807569	0.821999	0.83082	0.857298	0.804661	0.849626	0.811573	0.776782	0.697963	0.709963	0.674733	0.789875
																								1.78815	1.95085	2.03193	1.95506	1.95597	2.10787	2.22177	2.16595	2.19799	2.22281	2.01218	1.84431	1.8219	1.97024	1.92903	2.00076	2.0924	2.17008	2.24544	2.234	2.20219	2.169	2.17001	2.19915	2.24147	2.18277
																							0.954403	0.878876	0.891585	0.898623	0.905773	0.884584	0.900729	0.929731	0.937767	0.945943	0.954263	0.938389	0.939477	0.940568	0.940541	0.964451	0.992475	1.01026	1.03795	1.0672	1.09815	1.078	1.05858	1.03984	1.01656	0.994308	0.973006
																								1.04839	1.01952	1.03638	1.0395	1.04263	1.08584	1.13278	1.10852	1.14718	1.17061	1.19501	1.22046	1.23404	1.24793	1.25418	1.2605	1.26688	1.24436	1.21906	1.27542	1.29071	1.28359	1.26856	1.21489	1.19814	1.15269
																											0.492455	0.549755	0.622144	0.643757	0.626155	0.607882	0.616427	0.625213	0.690959	0.673058	0.678204	0.688708	0.713898	0.741	0.72679	0.764631	0.781452	0.761733	0.755917	0.740221	0.729234	0.705083	0.672746
																											1.03837	1.08523	1.09304	1.10096	1.109	1.06579	1.06134	1.01025	1.00714	1.00404	1.00097	0.997914	0.994877	0.991858	0.988858	0.985876	0.927408	1.01777	0.911303	0.917495	0.923771	0.930135	1.08525
																												0.992985	0.996228	0.966682	0.97371	0.902201	0.909816	0.921029	0.936741	0.909275	0.88383	0.930439	0.89615	0.861419	0.874833	0.956395	0.879871	0.911803	0.845284	0.927713	0.831222	0.917165	0.8941
																																										0.785727	0.879817	0.999506	1.04168	1.06599	1.09595	1.11137	1.11115
																																			1.3876	1.80706	1.70095	2.35468	3.01469	3.12106	2.97465	2.99355	3.06158	3.13278	2.73034	2.50708	2.46741	2.37987	2.95978
																																				1.73507	1.69133	1.69106	1.5783	1.67217	1.74548	1.60879	1.5261	1.42687	1.37746	1.42952	1.19299	1.28045	1.38174
2nd Tx dose: 10uG INS

0.811337	0.802728	0.859982	0.913253	1.04472	1.01541	1.03587	1.07751	1.18336	1.18368	1.19264	1.19852	1.22915	1.29276	1.33777	1.42516	1.44897	1.4405	1.45185	1.42165	1.43253	1.40015	1.38677	1.40689	1.40101	1.36631	1.35089	1.4158	1.39514	1.4222	1.431	1.45058	1.45819	1.54913	1.55259	1.4729	1.41456	1.42439	1.39882	1.39367	1.38806	1.33256	1.33234	1.35866	1.39975	1.40462	1.38452	1.38647	1.35201	1.35788
1.17691	1.31639	1.3612	1.42868	1.51002	1.43078	1.47178	1.52369	1.36706	1.42252	1.36688	1.3508	1.30358	1.25803	1.20838	1.15307	1.12746	1.08376	1.11022	1.21764	1.15076	1.21038	1.22325	1.27757	1.2255	1.18728	1.2261	1.3353	1.2069	1.17742	1.18633	1.2682	1.15922	1.14711	1.19385	1.18115	1.09664	1.0695	1.14888	1.1549	1.19155	1.17938	1.14084	1.08879	1.09954	1.1145	1.10537	1.13017	1.08605	1.08197
1.14066	1.15713	1.14864	1.14191	1.1464	1.14556	1.16087	1.18115	1.21637	1.16711	1.12692	1.11023	1.08784	1.09611	1.02793	1.09951	1.21096	1.27065	1.30564	1.39249	1.35118	1.3051	1.33736	1.25642	1.2036	1.17365	1.17877	1.13268	1.11703	1.11292	1.13898	1.18663	1.2105	1.18946	1.16744	1.19309	1.17469	1.18572	1.13429	1.10901	1.08172	1.06824	1.04615	1.03937	1.03452	0.989448	0.967546	0.950443	0.933331	0.90109
0.926057	0.873956	0.954504	0.937566	0.91378	0.958243	0.969926	0.965469	0.963545	0.927971	0.912119	0.895173	0.879842	0.833059	0.844266	1.00745	1.12331	1.15368	1.14425	1.13381	1.09246	1.10654	1.07066	1.04621	1.09068	1.08872	1.10941	1.10646	1.13871	1.15411	1.18217	1.19683	1.2239	1.21088	1.17535	1.15789	1.13294	1.11	1.1011	1.0966	1.11972	1.12248	1.07423	1.05022	1.06554	1.10194	1.10935	1.0715	1.07123	1.10614
0.910233	0.907162	0.934664	0.845802	0.885883	0.73704	0.884836	1.10677	1.102	0.90192	0.937722	1.08545	0.944458	0.835882	0.749697	0.847588	0.974882	1.18756	0.928964	0.878493	0.854379	0.858616	0.930828	0.843107	0.856168	0.764029	0.832057	0.876757	0.845998	0.796109	0.812406	0.927466	0.82928	0.941227	1.0174	0.903508	0.946464	1.0267	1.12809	1.17222	1.25571	1.14958	1.04939	1.08775	1.16565	1.20657	1.13201	1.10693	1.15195	1.12351
0.84997	0.855661	0.896315	0.9306	0.92542	0.937416	0.927346	0.921196	0.860978	0.923024	0.913913	0.932415	0.924863	0.933191	0.99425	1.10358	1.1789	1.30363	1.23808	1.24324	1.15046	1.08624	1.15942	1.10623	1.13771	1.13503	1.11068	1.05371	1.01182	1.00851	1.0231	1.00569	1.0481	1.083	1.22527	1.20613	1.25478	1.23739	1.25095	1.30371	1.34802	1.29167	1.2564	1.23771	1.2359	1.25031	1.28583	1.24277	1.2551	1.27422
0.774352	0.912342	0.886799	0.862648	0.839777	0.759616	0.760714	0.760532	0.813397	0.772518	0.832228	0.84365	0.817976	0.733546	0.768808	0.760984	0.738079	0.781812	0.783784	0.655372	0.563113	0.554869	0.576513	0.599914	0.625296	0.65292	0.683098	0.716201	0.752675	0.729499	0.865356	0.770201	0.812791	0.860367	0.913859	0.974443	1.04363	1.10264	1.11149	1.12048	1.12961	1.0415	1.26411	1.18887	1.12208	1.06239	1.38123	1.0711	0.874704	1.14394
0.881498	0.873042	0.86383	0.844667	0.801483	0.776139	0.820002	0.842809	0.762914	0.836344	0.752705	0.710022	0.868855	0.799274	0.740011	0.784228	0.860161	0.881122	0.854566	0.879027	0.9456	0.914907	0.906002	0.881441	0.89078	0.906622	0.916931	0.931702	0.95104	0.936098	1.05153	1.07784	1.11743	1.09213	1.02934	1.05437	1.04052	1.08205	1.03749	1.06949	1.00083	1.10171	1.12736	1.11261	1.08622	1.09495	1.08143	1.05354	1.04205	1.04482
0.871379	0.828842	0.773107	0.724394	0.633435	0.652192	0.638661	0.714701	0.762378	0.756018	0.791041	0.656203	0.604599	0.633178	0.72541	0.794599	0.765988	0.792173	0.917807	1.0908	0.95489	0.90952	1.05614	1.25912	1.22617	1.20244	1.03769	1.11509	1.04091	1.21673	1.13611	0.933509	1.05155	1.1434	1.06827	1.06808	1.06202	1.08164	0.937666	0.953115	0.856841	0.834255	0.950028	0.973079	1.14419	1.21126	1.22585	1.34638	1.22973	1.10606
9.85148	10.062	10.2818	10.5113	10.7513	5.23512	12.9843	15.8517	6.01281	7.26357	21.2477	7.64097	27.0137	28.6115	3.79828	4.23835	4.54779	4.90597	5.32539	5.82323	6.42375	7.16237	8.09291	9.30134	8.37059	7.60916	6.97471	8.05382	9.52795	2.23719	1.26739	1.4245	1.55036	1.87535	3.11751	5.32836	3.80114	2.10733	1.81124	1.54205	1.53749	2.89635	24.9283	26.9368	25.1312	10.3074	6.86955	22.9344	29.5051	11.047
																																					1.47014	1.48583	1.46832	1.47306	1.45907	1.47902	1.50217	1.49714	1.46839	1.44841	1.36499	1.32609	1.33638
0.896996	0.88697	0.91845	0.842902	0.771266	0.777865	0.747136	0.774919	0.810255	0.914318	0.886583	0.922188	0.94358	0.92421	0.844197	0.954728	1.01953	1.02164	1.02375	1.00889	0.947882	0.966672	0.955897	0.894431	0.857194	0.882355	0.881487	0.847755	0.87896	0.88933	0.799092	0.779204	0.818953	0.773104	0.748241	0.75272	0.721214	0.69224	0.693232	0.694227	0.666769	0.646968	0.61736	0.589593	0.605092	0.579524	0.546869	0.594751	0.615238	0.616794
0.97868	1.07587	0.977184	0.98488	0.840163	1.0011	1.23831	1.19177	1.14859	1.10844	1.071	0.908723	1.0685	0.909764	1.01077	1.13701	1.18707	1.19902	1.21121	1.06967	1.16291	1.02882	0.993025	0.970455	0.949857	1.13438	1.15044	0.996398	1.1547	1.12437	1.08254	0.951041	1.03643	1.13866	1.02454	1.01856	1.16195	1.1762	1.0594	1.05678	1.049	1.03305	1.04354	1.13859	1.09801	1.10325	1.05558	1.01186	1.17127	1.19226
																																																	0.78544
1.26741	1.34757	1.37275	1.26776	1.06154	0.912039	0.907526	0.903057	0.898632	0.985594	1.00456	1.02427	1.08553	1.08311	1.08749	1.02187	0.997146	0.973588	0.878826	0.832068	0.77058	0.813773	0.862095	0.916519	0.978278	1.04896	1.13065	1.19661	1.34596	1.40029	1.38649	1.43527	1.4876	1.54389	1.79344	2.55253	2.05009	1.83072	1.80592	1.84316	1.88196	1.95226	1.97303	2.01156	2.23397	2.83477	2.85799	3.04212	3.2516	2.85911
1.1418	1.05388	1.04747	1.06384	0.938711	0.961956	1.01157	0.965318	0.923107	0.966357	1.01386	0.972073	1.01138	1.00677	1.03061	1.06857	1.12839	1.07686	1.10401	1.13255	1.04304	0.966645	0.939889	0.924779	0.864923	0.899003	0.91582	1.0101	0.958943	0.997439	0.841914	0.841167	0.881018	0.97325	0.963119	0.948317	0.933964	0.914992	0.896775	0.91583	0.973131	0.907469	0.936162	0.97183	0.944538	0.95764	1.00929	1.00505	1.00085	0.996681
1.44774	1.44587	1.09096	1.10496	1.11932	1.03215	0.917675	0.875578	0.861295	0.84747	0.831852	0.816798	0.80228	0.788268	0.926552	1.12356	1.26128	1.29716	1.28664	1.18882	1.10113	1.17096	1.09552	1.04914	1.00414	0.98118	0.924115	0.933728	0.865269	0.849592	0.914779	0.908258	0.941433	0.992179	0.964521	1.01135	0.859927	1.00623	1.16022	1.0595	1.06589	1.00008	0.897079	0.92111	0.938004	0.900237	0.936348	0.88849	0.87006	0.813127
1.07259	1.09212	1.09542	1.06541	1.02116	1.13376	0.974939	0.882828	0.795743	0.780637	0.766093	0.854498	0.965969	0.884687	0.947161	0.961281	0.954556	0.985716	1.0276	1.07779	1.08036	1.12775	1.1469	1.14074	1.16863	1.16274	1.12773	1.1279	1.13726	1.14289	1.08357	1.08037	1.06803	1.01561	1.05106	1.05106	1.07771	1.12529	1.06661	1.09313	1.07347	1.07006	1.07057	1.06019	1.05458	1.00748	0.97521	0.94781	0.985437	0.952048
0.845992	1.06282	1.05867	0.852087	0.787578	0.732149	0.684009	0.64181	0.604514	0.571315	0.541573	0.514774	0.505728	0.496995	0.488558	0.480402	0.472515	0.536883	0.621555	0.599514	0.578984	0.559812	0.54187	0.510401	0.465303	0.455585	0.466662	0.478292	0.490515	0.50338	0.519448	0.508297	0.497614	0.531913	0.509071	0.527366	0.517333	0.57522	0.654068	0.757967	0.901107	1.1109	1.44802	2.07889	2.26252	2.2261	2.19083	1.49806	1.13816	1.03312
0.787135	0.88598	1.01321	1.13745	0.974104	0.985526	0.908198	0.790479	0.683308	0.731513	0.784786	0.72636	0.792731	0.756163	0.693312	0.640107	0.732988	0.857399	0.876368	0.896714	0.980911	0.977851	0.848074	0.899933	1.01048	0.81499	0.7165	0.639248	0.707724	0.79263	0.900686	1.04285	1.03632	1.07141	0.935925	1.03798	0.984612	0.936465	0.831927	0.901244	0.843757	0.851341	0.859063	0.866926	0.888263	0.934781	0.98644	1.04414	1.01856	0.964636
1.21187	1.15046	1.10123	1.1384	1.15324	1.16847	1.18411	1.1788	1.17354	1.17132	1.14192	1.09819	1.13845	1.13836	1.2576	1.40475	1.57927	1.70654	1.85613	1.68314	1.6675	1.65675	1.64613	1.49319	1.51572	1.52444	1.50116	1.46353	1.42775	1.3966	1.39814	1.45617	1.30005	1.46366	1.42848	1.39291	1.33576	1.40157	1.41211	1.28578	1.30374	1.28504	1.23172	1.2863	1.19673	1.20814	1.12926	1.28047	1.35314	1.33531
1.40428	1.38946	1.34372	1.36296	1.4072	1.41289	1.39717	1.35742	1.35058	1.34923	1.3006	1.27207	1.25462	1.22315	1.20299	1.24999	1.22983	1.29307	1.27293	1.25626	1.19178	1.18078	1.16589	1.15756	1.14975	1.12702	1.15114	1.11563	1.11349	1.08995	1.12849	1.15654	1.21767	1.21281	1.13298	1.14595	1.2198	1.21853	1.22642	1.21141	1.17483	1.16955	1.1651	1.10376	1.00413	1.01081	1.29668	1.17042	1.06657	0.979642
0.714275	0.675096	0.702618	0.684524	0.745963	0.756783	0.794472	0.824129	0.87227	0.939051	0.966274	0.882771	1.04955	0.903213	0.82086	0.827584	0.781222	0.827611	0.839197	0.842334	0.845494	0.79875	0.878055	0.896208	0.885082	0.883079	0.888906	0.894811	0.900795	0.898025	0.933	0.994067	0.924578	0.914901	0.931262	0.924124	0.933675	0.955326	0.911723	0.969474	1.16129	0.907362	0.878558	0.897593	0.891939	1.04978	0.954702	0.916264	0.88732	0.821546
	0.931108	0.973099	1.01897	1.04882	1.17375	0.901172	0.774799	0.738752	0.769198	0.802261	0.838294	0.735229	0.654732	0.763623	0.91596	1.02179	0.940494	0.864667	0.832039	0.847968	0.885253	0.918829	0.938839	0.960175	0.957399	0.948622	0.910372	0.906494	0.87325	0.842359	0.908729	0.936245	0.954155	0.967845	0.964751	0.999662	0.942424	0.868197	0.860255	0.96389	1.04412	1.01965	0.847402	0.979109	1.17828	1.24072	1.0014	0.839481	0.835261
		0.78917	0.800857	0.811702	0.844824	0.813057	0.808302	0.804128	0.820621	0.848816	0.85771	0.831387	0.808258	0.85676	0.936245	0.953231	0.916187	0.931844	0.899017	0.867497	0.867184	0.892503	0.896228	0.87736	0.873091	0.855648	0.806074	0.816634	0.850049	0.856731	0.86352	0.870417	0.897136	0.891815	0.886557	0.88727	0.887983	0.871276	0.855186	0.854302	0.853419	0.834236	0.852861	0.856425	0.881977	0.909101	0.888348	0.891331	0.894335
																																							1.44747	1.3233	1.72492	1.85646	1.84762	1.83886	1.76805	1.68974	1.72987	1.7356	1.67375
			1.29943	1.24764	1.25679	1.17292	1.24967	1.21309	1.17455	1.19385	1.14322	1.11259	1.0876	1.08653	1.20986	1.23871	1.34466	1.3336	1.34211	1.36519	1.33565	1.32357	1.37524	1.37843	1.37627	1.3717	1.36715	1.36263	1.33153	1.34013	1.34876	1.3575	1.33693	1.34787	1.33047	1.27497	1.25782	1.28028	1.3189	1.34212	1.34691	1.28228	1.29042	1.29709	1.29379	1.24986	1.17651	1.17884	1.25524
			1.56169	1.53257	1.50511	1.33619	1.23093	1.19387	1.15897	1.14648	1.18075	1.21713	1.28189	1.35393	1.43456	1.52539	1.48479	1.53752	1.59414	1.65508	1.72087	1.80064	1.80292	1.8052	1.7213	1.75763	1.72179	1.68738	1.65432	1.65321	1.74944	1.63241	1.56584	1.66403	1.76945	1.57871	1.5326	1.53834	1.49635	1.42044	1.41831	1.33262	1.21063	1.26168	1.25528	1.22435	1.32074	1.23039	1.3109
			1.24404	1.28441	1.29929	1.37542	1.3938	1.29208	1.22711	1.06321	1.21151	1.08821	1.18102	1.29112	1.42387	1.55999	1.34457	1.18142	1.05358	0.95071	1.12493	1.08081	0.953012	0.852241	0.881566	1.00837	1.12617	1.05531	0.929939	0.863419	0.857313	0.832237	0.854392	0.794563	0.759403	0.810809	0.802147	0.784738	0.768068	0.86484	0.989512	0.988941	1.03777	1.09949	1.13911	1.14933	1.18005	1.22525	1.23076
										3.13641	3.00347	2.88134	2.72548	2.66604	3.16066	3.16772	2.8081	3.09928	3.12816	2.96618	3.0716	2.89782	3.17276	3.10958	2.97704	3.20167	3.34053	3.61964	3.81623	4.50269	4.64899	5.06452	4.89903	4.26639	4.53985	5.97366	5.22567	4.7275	4.23071	4.90843	4.47201	4.88995	4.85736	4.82519	5.38992	5.45864	4.98183	5.31667	5.44165
					1.05548	1.05464	1.26522	1.58088	1.73977	1.50777	1.33037	1.19032	1.32034	1.48225	1.21563	1.3835	1.65432	1.35773	1.35929	1.36084	1.36095	1.36106	1.36117	1.36127	1.36138	1.38732	1.36969	1.35251	1.3879	1.39637	1.46672	1.54453	1.31534	1.32473	1.33426	1.34393	1.37392	1.35639	1.33931	1.32265	1.30639	1.29054	1.27506	1.32223	1.34955	1.64758	1.44067	1.27993	1.30213
					0.717364	0.696636	0.738022	0.7281	0.660913	0.664009	0.674557	0.685445	0.696691	0.708312	0.720327	0.746804	0.775303	0.715272	0.663869	0.659787	0.655755	0.651772	0.647837	0.643949	0.663056	0.683333	0.662152	0.629109	0.628655	0.623729	0.618879	0.614104	0.609403	0.604773	0.600212	0.59572	0.56407	0.562004	0.559953	0.57993	0.573075	0.563886	0.546725	0.530578	0.499351	0.471595	0.486263	0.487845	0.49074
						0.929324	1.16254	1.00234	0.880935	0.916829	0.955773	0.998171	1.03414	1.0728	1.11447	1.1595	1.20832	1.26144	1.10062	1.03924	0.984333	0.93494	0.954038	0.973933	0.994674	1.01632	1.03893	0.861801	0.774187	0.764316	0.777066	0.776187	0.778628	0.781097	0.795328	0.810088	0.825406	0.843052	0.861468	0.888203	0.916649	0.946978	0.955233	0.99859	0.99083	0.983189	1.03535	1.09336	1.15825
							9.67508	9.65168	9.29528	8.77289	8.5193	9.55328	9.30815	9.6074	9.96673	9.98693	10.1562	10.1308	9.77617	10.244	11.0743	11.3423	12.4079	13.6944	14.0965	13.8552	13.6221	13.2681	12.2551	12.6324	12.7017	13.2673	13.7851	13.4972	13.805	13.2629	12.7476	11.5426	11.5454	9.52895	9.97094	10.1957	10.1038	8.87233	9.76638	11.4846	10.1268	9.72883	10.3136
							1.33871	1.35119	1.02643	0.963291	1.08698	1.24711	1.14606	1.06016	0.843886	0.867345	0.892145	0.918406	0.946259	0.932845	0.911395	0.890909	0.889776	0.888646	0.88752	0.886396	0.885274	0.884556	0.883839	0.883123	0.882408	0.881694	0.880982	0.88027	0.890174	0.900302	0.913434	0.926955	0.940881	0.975662	0.966544	0.919204	0.945379	0.975717	1.02534	1.02161	1.01792	1.01425	1.01061
												1.02816	1.03956	1.07844	1.15749	1.20484	1.31011	1.21943	1.17184	1.17957	1.1819	1.16039	1.17127	1.12636	1.12676	1.42214	1.28031	1.3113	1.31719	1.43356	1.5861	1.65787	1.73913	1.77241	1.74236	1.72721	1.71919	1.65108	1.62965	1.67713	1.74723	1.7553	1.66916	1.59187	1.74882	1.72893	1.56701	1.54565	1.53171
																																						0.597243	0.637913	0.720043	0.787238	0.832091	0.888184	0.853206	0.99928	1.01864	0.833904	0.720445	0.634163
																										1.23985	1.1861	1.19313	1.15904	1.16664	1.12385	1.11231	1.12371	1.06299	1.09629	1.18776	1.11715	1.11508	1.13198	1.12936	1.12115	1.11897	1.13277	1.13731	1.18165	1.16739	1.16878	1.1534	1.11105
																																				1.12623	1.10397	0.993073	0.98336	1.04501	0.975165	0.91407	0.880007	0.995179	0.922237	0.967928	0.846949	0.821814	0.833092
																																						0.839055	1.08	1.51509	2.53723	2.46118	5.09505	5.77327	6.65979	7.86796	9.61163	12.3482	17.2633
0.998553	1.03728	1.05061	1.09099	1.10531	1.11849	1.12204	1.11011	1.11135	1.11933	1.08072	1.06935	1.04175	1.06608	1.05816	1.14782	1.19978	1.26355	1.28267	1.30383	1.30809	1.32276	1.34175	1.34277	1.34642	1.36614	1.3873	1.4046	1.37071	1.38412	1.38402	1.38171	1.38299	1.39699	1.39505	1.37818	1.38756	1.37091	1.34548	1.33193	1.33412	1.31382	1.29998	1.31171	1.32603	1.312	1.31814	1.33506	1.33626	1.3587
1.54398	1.50481	1.49234	1.48516	1.52221	1.58966	1.56276	1.57805	1.61375	1.67856	1.77716	1.71318	1.6712	1.66923	1.72211	1.73092	1.88573	1.77373	1.72186	1.68306	1.76255	1.9076	1.83128	1.85749	1.8372	1.84027	1.83637	1.79432	1.74833	1.66811	1.67031	1.62897	1.63461	1.60707	1.62814	1.65038	1.71713	1.76585	1.78725	1.85489	1.92967	1.90609	1.86124	1.76442	1.89351	1.97436	1.96372	1.94887	1.84547	1.86958
1.01165	1.00986	0.961376	0.937192	1.09739	1.20704	1.24539	1.2872	1.35104	1.41062	1.54349	1.63348	1.57749	1.57344	1.62887	1.58097	1.5885	1.61425	1.62665	1.63913	1.64718	1.63421	1.65265	1.66069	1.69886	1.7606	1.80186	1.86231	1.78759	1.8366	1.80352	1.7379	1.73527	1.652	1.64118	1.63448	1.62152	1.5877	1.59228	1.54775	1.53653	1.58565	1.49412	1.49492	1.42898	1.44294	1.41051	1.4065	1.44395	1.40497
1.29868	1.5545	1.45188	1.35879	1.46588	1.4081	1.3414	1.31326	1.26425	1.23976	1.28137	1.23728	1.25947	1.24333	1.26431	1.28419	1.31312	1.27233	1.29394	1.26809	1.20436	1.15642	1.18545	1.2333	1.22416	1.29672	1.32842	1.36047	1.3059	1.25554	1.19659	1.09923	1.15304	1.18272	1.13966	1.16867	1.18428	1.20152	1.21971	1.20878	1.1932	1.18349	1.19249	1.19734	1.18159	1.15783	1.19149	1.21538	1.29294	1.3075
1.70166	1.99466	1.98831	1.72352	1.61993	1.3466	1.13063	1.11202	1.13362	1.19562	1.25082	1.19093	1.2339	1.25305	1.09955	0.979553	1.16161	1.27032	1.31108	1.33084	1.35863	1.36069	1.43516	1.39873	1.41279	1.38464	1.30725	1.29101	1.18636	1.22954	1.25358	1.23003	1.18801	1.29173	1.42933	1.44877	1.25963	1.31541	1.37381	1.4518	1.57356	1.50555	1.46948	1.44314	1.36815	1.29389	1.28418	1.28642	1.28308	1.33449
1.09662	1.0735	1.054	1.04848	1.08289	1.09638	1.06296	1.01802	0.976723	0.983425	0.993511	1.00008	0.992859	1.00943	1.00399	1.11815	1.16291	1.20604	1.18818	1.18199	1.14365	1.09343	1.06586	1.09386	1.02682	0.999865	1.04625	1.01465	1.08322	1.02985	1.10374	1.15775	1.00692	0.86007	0.87517	0.896156	0.814261	0.81946	0.816605	0.809586	0.830463	0.835138	0.748144	0.783697	0.782623	0.730331	0.737835	0.653266	0.644188	0.691501
1.04786	1.00913	1.00465	1.05492	1.00738	1.0957	1.16357	1.27097	1.2417	1.13236	1.13476	1.08787	1.07978	1.07039	1.084	1.13613	1.13953	1.19721	1.14003	1.11719	1.14961	1.14243	1.11023	1.10195	1.06751	1.01879	1.04359	1.04413	1.05874	1.0492	1.00472	1.0203	1.0272	1.06113	1.07662	1.10156	1.12767	1.19707	1.24288	1.25081	1.25584	1.2267	1.10221	1.11298	1.12398	1.04038	1.09333	1.10774	1.11612	1.09916
1.12633	1.14597	1.19431	1.27711	1.30659	1.39656	1.43681	1.53543	1.48785	1.51356	1.59433	1.50338	1.43155	1.36678	1.38059	1.33598	1.47669	1.56856	1.63338	1.73631	1.75313	1.68021	1.67592	1.57794	1.49079	1.4732	1.49269	1.52482	1.63916	1.63134	1.73372	1.70886	1.6276	1.59445	1.6134	1.55703	1.49298	1.49221	1.51425	1.51803	1.47796	1.53413	1.42078	1.39382	1.30204	1.25545	1.2111	1.25061	1.28292	1.34234
1.00696	0.993088	1.0039	1.02025	1.08273	1.04674	1.10931	1.00822	0.916643	0.952233	0.896416	0.847249	0.790642	0.792123	0.816869	0.897875	0.969388	1.06369	1.03984	1.01276	0.942422	0.91894	0.918006	0.983378	0.882577	0.880893	0.811687	0.77876	0.748401	0.793951	0.808492	0.750198	0.799403	0.854934	0.920015	0.85923	0.80598	0.920889	1.07401	1.12577	1.1664	1.15549	1.15254	1.20295	1.18884	1.01003	1.03533	1.06193	1.03038	1.06225
1.21643	1.2967	1.32515	1.29696	1.39711	1.47004	1.50781	1.49301	1.46805	1.58622	1.59018	1.58613	1.55787	1.44477	1.37013	1.36272	1.44916	1.48023	1.4934	1.37635	1.23927	1.23321	1.18596	1.1925	1.32558	1.09647	1.31929	1.2467	1.30865	1.28805	1.37166	1.35956	1.38371	1.32912	1.33659	1.28296	1.22061	1.32866	1.42474	1.39951	1.7465	1.66138	1.68968	1.71785	1.55458	1.5439	1.50377	1.51418	1.50005	1.57985
3.72399	2.15909	1.5961	1.26599	1.52776	1.92602	1.86922	1.92834	1.98322	2.00945	2.09212	2.01485	2.20612	2.18989	2.20245	2.16816	2.21834	2.26958	2.25496	2.12016	2.07158	2.02707	2.01938	1.93201	1.95997	1.95407	1.87546	1.87079	1.86284	1.85805	1.80785	1.80665	1.73289	1.73414	1.65297	1.55406	1.65036	1.65816	1.70802	1.76621	1.72831	1.67779	1.68394	1.73109	1.76881	1.72095	1.78823	1.72853	1.75347	1.77913
1.06964	1.08736	1.07008	1.07034	1.02252	0.994836	1.00687	1.0125	1.02466	1.02944	1.02601	1.03041	1.05002	1.0397	1.01402	1.1591	1.12919	1.16163	1.14574	1.13028	1.14741	1.11619	1.08662	1.05858	1.03316	1.10997	1.19053	1.22009	1.30569	1.21528	1.31225	1.32061	1.39172	1.40388	1.38099	1.40811	1.45192	1.50932	1.43025	1.41716	1.48383	1.43122	1.40693	1.41571	1.45174	1.41123	1.35655	1.38072	1.342	1.38723
1.27856	1.32551	1.29695	1.28117	1.26577	1.29848	1.33293	1.33421	1.35202	1.37031	1.36499	1.41146	1.33467	1.28433	1.30034	1.31674	1.29378	1.32444	1.33837	1.3813	1.38109	1.38155	1.33148	1.30467	1.29162	1.26008	1.29926	1.34853	1.40799	1.44217	1.43657	1.4343	1.42197	1.46641	1.48791	1.4749	1.49122	1.43485	1.45664	1.48444	1.46867	1.50585	1.5119	1.53621	1.5641	1.5653	1.50193	1.38987	1.39282	1.33191
1.62284	1.63601	1.53733	1.48388	1.43915	1.51665	1.52719	1.48883	1.5502	1.52674	1.35251	1.57377	1.52883	1.50785	1.40679	1.57065	1.47698	1.51777	1.5492	1.63429	1.51766	1.47216	1.51658	1.56376	1.7569	1.57339	1.62435	1.95127	1.68912	1.32288	1.65058	1.64505	1.63955	1.63408	1.50034	1.38683	1.37233	1.44583	1.52764	1.53511	1.54266	1.79616	1.66808	1.85464	1.66562	1.71869	1.79442	1.73306	1.71593	1.70853
1.3757	1.36956	1.3675	1.47139	1.41154	1.4287	1.42378	1.40418	1.40297	1.41783	1.42151	1.45887	1.47441	1.49739	1.60831	1.63113	1.8844	1.85273	1.8221	1.79248	1.7638	1.77962	1.79573	1.6225	1.75769	1.75518	1.75602	1.5677	1.58962	1.77278	1.61216	1.61659	1.61535	1.65617	1.69949	1.72881	1.77093	1.69073	1.69079	1.63435	1.73078	1.75898	1.78077	1.80926	1.69234	1.58961	1.72426	1.60585	1.61969	1.63377
0.936616	0.985286	1.06426	1.00734	1.02651	1.00712	1.0428	1.02523	1.03382	1.06112	1.02429	0.984994	0.94175	0.923214	0.924326	1.08176	1.23517	1.25778	1.22758	1.1464	1.08777	1.08124	1.06656	1.12082	1.12731	1.13366	1.08595	1.05013	1.0555	1.05666	1.04986	1.0627	1.08701	1.11051	1.09132	1.1365	1.12041	1.10184	1.07485	1.04692	1.07729	1.08371	1.10346	1.13593	1.15548	1.20109	1.25024	1.29251	1.29611	1.27472
0.882304	0.867611	0.908805	0.91047	0.893125	0.939141	0.95531	0.925817	0.950111	0.982051	0.993163	1.00731	1.02958	1.04978	0.979584	0.954947	0.952075	0.946597	0.976497	0.959024	1.02712	1.0836	1.10502	1.05276	1.04778	1.02069	0.995182	0.939448	0.927611	0.938077	0.952474	1.0244	1.06665	1.1022	1.1154	1.19908	1.19672	1.20722	1.25691	1.29384	1.39408	1.92849	1.3619	1.18171	1.19545	1.27923	1.40184	1.36573	1.21827	1.15824
0.985416	0.907148	1.08757	1.10247	1.09267	1.23517	1.1977	1.0613	1.05199	1.08956	1.13183	1.15656	1.33544	1.29236	1.27988	1.28456	1.1597	1.14934	1.11662	1.08572	1.05648	1.06858	1.1541	1.19166	1.02555	1.03771	1.05016	1.06291	1.07598	1.11325	1.15321	1.19613	1.35136	1.36687	1.35445	1.40609	1.46183	1.5755	1.57836	1.58123	1.58411	1.66039	1.69579	1.51528	1.47553	1.45942	1.84817	1.86959	1.89151	1.67075
1.19541	1.18024	1.16079	1.15799	1.17484	1.1791	1.16421	1.17333	1.15548	1.18896	1.20943	1.20473	1.2177	1.20847	1.22915	1.31438	1.41786	1.49877	1.52418	1.48976	1.44148	1.35912	1.32748	1.30501	1.30276	1.29464	1.32913	1.36524	1.43694	1.44684	1.5603	1.64674	1.72227	1.83346	1.86407	1.94129	1.90018	1.89782	1.84062	1.86547	1.88534	1.84368	1.80162	1.7787	1.81096	1.73549	1.67482	1.68576	1.74177	1.75859
0.739074	0.733927	0.748441	0.771216	0.82704	0.809022	0.791771	0.775241	0.759387	0.734945	0.648116	0.595656	0.551052	0.678274	0.881873	0.954989	0.984402	1.02397	1.01765	1.00617	0.985754	0.999417	0.97874	0.992018	0.984304	0.96014	0.986382	0.991442	1.02209	1.02608	1.07162	1.05745	1.05391	1.06169	1.08642	1.07553	1.06145	1.08216	1.08856	1.01601	1.05293	1.06437	1.07008	1.06498	1.0534	1.00752	0.959676	1.03045	1.03855	1.03918
																																										0.590451	0.541017	0.517123	0.49525	0.53159	0.573685	0.524805	0.613897
1.00935	0.963999	0.980091	0.978498	1.19116	1.52192	1.45364	1.48261	1.42455	1.44002	1.54805	1.44811	1.39414	1.44579	1.49459	1.41752	1.68975	1.68847	1.81275	1.77853	1.78085	1.68099	1.71671	1.68978	1.55606	1.63598	1.54698	1.66263	1.53894	1.55439	1.53893	1.6442	1.63418	2.60618	2.34558	2.13236	1.85334	2.55384	2.42844	1.96231	1.74991	1.79384	1.7433	1.7175	1.71698	1.67206	1.59085	1.62835	1.51815	1.49109
1.09668	1.10241	1.09653	1.11165	1.03355	1.06542	1.07826	1.10753	1.09064	1.06715	0.999327	1.05912	1.05082	1.04128	1.04748	1.09638	1.13909	1.11976	1.13221	1.1057	1.11586	1.08909	1.06364	1.03936	0.994963	1.00247	1.00794	0.99639	1.0162	1.02177	0.990116	1.00197	1.01482	0.989639	0.985037	0.959196	0.961986	0.949117	0.930467	0.950158	0.934722	0.982572	0.998542	1.00647	1.05793	1.11493	1.11868	1.11302	1.10742	1.10188
1.33817	1.26851	1.27631	1.24997	1.20979	1.18151	1.16645	1.15176	1.22577	1.25701	1.28837	1.32133	1.35602	1.39259	1.43118	1.47197	1.528	1.52231	1.51645	1.51064	1.50487	1.51496	1.54409	1.52926	1.51471	1.49139	1.47863	1.44382	1.43355	1.39714	1.48911	1.25853	1.23359	1.18439	1.16634	1.10842	1.05598	1.12876	1.21232	1.16753	1.24618	1.2521	1.25807	1.2641	1.27019	1.14465	1.0417	1.30587	1.16885	1.14327
1.39982	1.40435	1.90207	1.60272	1.68492	1.87471	1.87654	1.81279	1.6764	1.89684	1.84306	1.86632	1.87595	1.84454	1.82288	1.66501	1.65367	1.8572	1.85387	1.87143	1.88932	1.87639	1.86364	2.00061	2.04674	2.07074	2.11811	2.1677	2.18523	2.1807	2.12771	2.16542	2.28208	2.40997	2.27428	2.32684	2.38189	2.43961	2.35139	2.11	1.94629	1.79036	1.65431	1.53747	1.43605	1.39689	1.41716	1.43137	1.32596	1.45383
0.809058	0.737781	0.732431	0.725234	0.775516	0.81275	0.865872	0.871498	0.894174	0.842247	0.824065	0.842615	0.859319	0.844956	0.801889	0.838392	0.856596	0.831847	0.875926	0.881784	0.910619	0.920389	0.938158	0.932073	0.897767	0.869289	0.852654	0.87562	0.882575	0.863312	0.803635	0.811905	0.663377	0.560788	0.485679	0.48542	0.485161	0.484902	0.484643	0.484385	0.484127	0.48387	0.483612	0.456879	0.458834	0.460805	0.461131	0.461457	0.461784	0.455074
1.06286	1.08243	1.05768	1.1279	1.10735	1.14928	0.999991	0.971199	0.934155	0.998245	0.964576	1.01078	1.04034	1.14542	1.18762	1.25981	1.34029	1.50202	1.47579	1.3896	1.41544	1.41508	1.33117	1.35609	1.25746	1.28017	1.28378	1.32462	1.28617	1.29435	1.21483	1.1904	1.17907	1.1177	1.09982	1.08825	1.09599	1.11004	1.12446	1.13925	1.15444	1.12817	1.10307	1.07906	1.09168	1.119	1.14772	1.17796	1.20983	1.24347
	0.492997	0.491966	0.490939	0.489916	0.488898	0.487884	0.486874	0.485868	0.484866	0.510884	0.539852	0.577114	0.548981	0.597817	0.656191	0.708151	0.668621	0.684253	0.70323	0.788215	0.787238	0.780993	0.812451	0.764516	0.721923	0.766149	0.754907	0.789627	0.823683	0.861482	0.905237	0.926302	0.897381	0.95718	0.963072	0.930315	0.984638	1.01694	1.04473	1.05513	1.05032	1.06941	1.09985	1.14707	1.14501	1.14462	1.11092	1.11586	1.1332
1.10078	1.09202	1.09732	0.941038	0.869251	0.93074	0.919585	0.932389	1.10015	1.32665	1.7768	2.73738	5.95893	2.88202	1.88777	1.40357	1.45029	1.59377	1.70633	1.60012	1.37976	1.18199	1.14302	1.10654	1.07679	1.24402	1.22583	1.29771	1.61146	1.79769	1.7856	1.79465	1.69341	1.55394	1.35555	1.20209	1.04501	0.957315	0.858719	0.832168	0.807209	0.780484	0.747882	0.758546	0.806957	0.932746	0.97137	0.998467	1.00935	1.02048
1.26147	1.2125	1.24439	1.26251	1.33661	1.50501	1.48123	1.38343	1.35819	1.27872	1.22454	1.17477	1.21788	1.28247	1.35431	1.43467	1.57489	1.74549	1.71615	1.71574	1.62885	1.61639	1.55408	1.49639	1.44283	1.48594	1.53171	1.5306	1.52949	1.52838	1.59796	1.53077	1.469	1.47053	1.47206	1.3951	1.41653	1.44342	1.47135	1.50039	1.47322	1.51535	1.52901	1.50095	1.50517	1.46896	1.4286	1.39192	1.31482	1.1545
	1.01734	0.946886	0.967989	0.987351	0.871278	0.839765	0.860086	0.849369	0.883397	0.863905	0.81408	0.795725	0.950093	0.852895	1.07501	1.17077	1.22907	1.21386	1.25083	1.28002	1.25861	1.23659	1.2026	1.19013	1.17925	1.14731	1.09743	1.07941	1.0977	1.05186	1.03287	1.02904	1.03729	1.04877	1.01777	1.02692	0.948847	0.913896	0.896471	0.883104	0.831264	0.830467	0.809002	0.823167	0.835379	0.847958	0.84409	0.840257	0.875879
	2.10716	2.10624	2.06253	2.05383	2.01896	1.9633	1.91062	1.89738	1.90963	2.00552	2.11154	2.22941	2.36121	2.50958	2.67784	2.92548	3.15076	3.27598	3.41156	3.23095	3.31487	3.28221	3.47747	3.20758	3.12732	3.41403	3.36138	3.18232	3.1365	2.98165	2.81819	2.57653	2.37303	2.20792	2.37202	2.33327	2.29577	1.96677	1.89371	1.86622	1.86657	1.8252	1.87226	1.99653	1.78554	1.62009	1.6885	1.68824	1.7619
																																															0.741952	0.717432	0.691612
		1.09378	1.10167	1.07149	1.08013	1.08455	1.05728	1.07352	1.06591	1.102	1.09253	1.09406	1.08345	1.09898	1.24114	1.35738	1.47713	1.48085	1.46366	1.4423	1.42333	1.40343	1.35933	1.35714	1.43877	1.39878	1.51352	1.51406	1.51033	1.49838	1.40684	1.3498	1.29861	1.28432	1.27035	1.25667	1.24725	1.29157	1.28457	1.27764	1.4808	1.34864	1.34818	1.35502	1.36193	1.38778	1.35158	1.31722	1.34912
			0.715902	0.66928	0.671568	0.716795	0.725938	0.735317	0.744942	0.77425	0.755212	0.740552	0.717303	0.848783	0.974938	0.9754	0.987068	0.999018	1.13508	1.09468	1.05378	1.10631	1.1362	1.12842	1.16434	1.1681	1.0782	1.19988	1.13854	1.23736	1.23344	1.21733	1.17214	1.18419	1.20631	1.23658	1.31194	1.08752	1.13783	1.17312	1.12332	1.13989	1.11535	1.09184	1.11557	1.32609	1.28385	1.40612	1.44529
			1.15892	1.15661	1.14324	1.11275	1.15673	1.61641	1.34416	1.37499	1.51268	1.48554	1.45936	1.74456	2.16832	1.56988	1.52634	1.61895	1.56104	1.48595	1.44534	1.42271	1.47696	1.48631	1.50393	1.45122	1.48246	1.48335	1.4759	1.44765	1.40939	1.38421	1.35991	1.38626	1.39068	1.39512	1.40402	1.35651	1.36945	1.3622	1.35502	1.37255	1.40388	1.408	1.44282	1.4957	1.52077	1.53856	1.50043
			1.03734	1.08422	1.23748	1.05569	1.23687	1.5852	1.70292	2.07647	2.16144	2.3347	2.35418	2.50499	2.77694	2.29852	2.54863	2.32132	2.37152	2.4437	2.52041	2.60209	2.68924	2.78243	1.85837	1.67949	1.60483	1.44725	1.39103	1.44647	1.37768	1.4748	1.45857	1.50561	1.53891	1.51141	1.48488	1.66292	1.71571	1.71328	1.73659	1.72083	1.73949	1.67438	1.59338	1.5884	1.55894	1.58312	1.57074
																								1.51418	1.57871	1.64898	1.7517	1.86808	1.90453	1.93488	1.96621	2.0426	1.84423	1.84597	1.82067	1.79605	1.90282	2.02309	2.16647	2.1437	2.18766	2.06475	2.22525	1.87449	1.98418	2.10751	1.94093	1.79875	1.78579
					1.04813	1.06632	1.0776	1.06986	1.08962	1.16647	1.21445	1.27476	1.23976	1.31358	1.39674	1.28342	1.32339	1.27764	1.31726	1.39888	1.48423	1.36208	1.38362	1.3746	1.32013	1.28018	1.33389	1.34468	1.367	1.33273	1.39155	1.3755	1.33154	1.35902	1.33265	1.33441	1.31209	1.27502	1.14732	1.1058	0.990456	0.917309	0.872131	0.887196	0.923444	0.963886	0.980685	0.998081	1.07931
							1.07765	1.03348	1.00155	1.08094	1.17402	1.28463	1.41825	1.2528	1.27158	1.29093	1.31087	1.41373	1.47495	1.39717	1.41452	1.24782	1.3683	1.43322	1.38445	1.34235	1.3191	1.19205	1.1526	1.27916	1.29402	1.30922	1.32477	1.11849	1.1697	1.22582	1.23665	1.24768	1.30809	1.38038	1.30677	1.40439	1.39899	1.20339	1.17386	1.15223	1.13139	1.11128	1.07815
								0.972865	1.03087	1.00406	1.00954	1.03338	1.05328	0.965358	0.895293	1.05931	1.04157	1.13088	1.14366	1.05425	1.19305	1.13958	1.06624	1.1518	1.13466	1.13903	1.10536	1.10364	1.12502	1.11587	1.0354	1.00718	1.08115	1.00684	1.04585	1.10345	1.14568	1.16403	1.11221	1.06722	1.04224	1.03093	1.03452	1.03447	1.04981	1.1863	1.17121	1.16558	1.19954
																																											1.00461	1.12457	0.943185	0.812182	0.985818	0.925149	1.0348
														1.79746	2.61741	2.26442	2.33182	2.23221	1.87239	2.61375	2.72368	2.76435	2.31925	2.78029	2.81477	2.85012	2.83464	2.06988	1.71511	1.82326	1.94597	1.9428	1.93965	1.9365	2.9217	5.94754	5.87547	5.80513	5.73645	2.28084	1.42339	1.43427	1.4349	1.44719	1.33255	1.23474	1.15031	1.14695	1.11454
																		1.76891	1.73347	1.6836	1.55493	1.44453	1.34877	1.3764	1.40517	1.43518	1.4665	1.56143	1.56746	1.68289	1.71596	1.70233	1.64285	1.58739	1.58727	1.62088	1.58384	1.51735	1.50095	1.40687	1.47668	1.45985	1.47766	1.50644	1.53136	1.52911	1.52686	1.52462	1.52486
																			1.22645	1.13325	1.2052	1.23207	1.26016	1.28744	1.29469	1.30625	1.33602	1.32679	1.34171	1.3219	1.33725	1.35581	1.3681	1.31148	1.25137	1.25121	1.27068	1.31025	1.34655	1.3938	1.4171	1.41708	1.41482	1.48194	1.53189	1.63163	1.68074	1.74917	1.69534
																				2.52682	2.92322	3.16496	3.14864	2.96966	2.88487	2.94815	3.00431	3.0135	2.88539	2.76773	2.65928	2.55902	2.50052	2.44463	2.38226	2.29172	2.20781	2.21771	2.22771	2.2378	2.24878	2.18431	2.12344	2.06586	2.01133	1.9596	1.91047	1.86373	1.94542
																						1.07843	0.890018	0.91107	0.900782	1.0055	0.987273	1.04762	1.13146	1.03702	1.01843	1.04105	1.09741	1.0312	1.02347	1.07634	1.02381	1.0932	1.11003	1.15572	1.10369	0.993096	0.985941	1.09507	1.05845	1.11914	1.1348	1.15187	1.11318
																														1.09888	1.11288	1.05795	1.04987	1.04192	1.03409	1.03358	1.03307	1.04317	1.05347	1.06132	1.04485	1.00982	0.960157	0.934924	0.932783	0.963131	0.953272	0.949596	0.948939
																																	1.42985	1.50125	1.4791	1.45782	1.39705	1.29841	1.26433	1.22733	1.27444	1.32531	1.35479	1.47769	1.53291	1.52229	1.54974	1.57376	1.59878
																																														0.60076	0.683302	0.801894	0.858959
																																													1.72769	2.23692	1.87592	2.13526	2.47782
																																															1.18728	1.17086	1.48636
[truncated: 99 more columns]

## Sheet: FL_TFEB_TR AA then Ins
FL_TFEB_TR; cells treated with AA then Ins, at time points 4, 14; sampling time: 6 min; data are cells-by-time
2nd Tx dose: media
0.314618	0.305125	0.306649	0.304298	0.313389	0.30819	0.30854	0.330757	0.320274	0.331073	0.343645	0.366438	0.403225	0.427156	0.452077	0.470388	0.51345	0.53304	0.53909	0.569199	0.592265	0.597822	0.638691	0.651903	0.617036	0.64885	0.637206	0.608633	0.62873	0.614987	0.608815	0.611343	0.625471	0.633238	0.621605	0.61307	0.583486	0.56944	0.628786	0.584654	0.597572	0.555193	0.562839	0.54063	0.547691	0.581754	0.579799	0.610788	0.590075	0.560905
0.703293	0.869775	0.83462	0.794258	0.819123	0.876163	0.913908	0.942237	0.966375	0.955215	0.935167	0.912493	0.927517	0.9138	0.949178	0.989895	1.02723	1.00472	1.00844	0.960309	0.899795	0.827565	0.815271	0.781196	0.778455	0.771457	0.749561	0.748441	0.706926	0.683279	0.645691	0.63735	0.644886	0.652603	0.656033	0.638571	0.624544	0.653614	0.660432	0.723614	0.746576	0.738261	0.800349	0.858285	0.860411	0.869472	0.868742	0.859336	0.815394	0.832861
2.1813	2.29853	2.11125	2.04154	1.98578	2.0198	1.70006	2.27383	1.82084	1.82584	2.09183	1.78467	1.8689	1.96147	1.57586	1.61572	1.83514	1.873	2.0045	2.07316	1.92877	1.73633	1.79786	1.80785	1.77809	2.0657	1.58048	1.56054	1.57578	1.76547	1.7856	1.99033	1.94416	1.99264	1.44898	1.58307	1.9871	2.16931	1.96988	1.86154	2.08135	1.50241	1.36492	1.41372	1.87754	2.2729	2.72097	2.43291	2.27513	2.26697
0.470592	0.446347	0.44762	0.44015	0.444297	0.425407	0.408602	0.399763	0.408411	0.429627	0.455114	0.465788	0.447138	0.448357	0.402175	0.385343	0.394204	0.404976	0.400057	0.40943	0.419253	0.450733	0.463259	0.498561	0.481627	0.478871	0.494229	0.510604	0.505443	0.517712	0.513174	0.517448	0.539086	0.54558	0.556736	0.539471	0.541907	0.517987	0.500917	0.480176	0.461085	0.475898	0.496884	0.509009	0.50264	0.543202	0.519972	0.526727	0.547506	0.504303
0.669111	0.663109	0.644942	0.658211	0.689569	0.656975	0.627323	0.658366	0.652309	0.674334	0.711228	0.752392	0.706352	0.745476	0.783975	0.771471	0.772193	0.760575	0.751929	0.743477	0.725368	0.733305	0.741418	0.718691	0.698695	0.712257	0.686311	0.678752	0.662249	0.636475	0.702618	0.704621	0.691733	0.679307	0.65562	0.653714	0.659764	0.615896	0.591844	0.584434	0.553993	0.53557	0.517591	0.529188	0.535234	0.514604	0.566343	0.563201	0.574116	0.601222
0.847816	0.620464	0.78327	0.782461	0.781654	0.780848	0.792293	0.744074	0.749591	0.882219	0.947893	0.837829	0.886861	0.941989	0.827963	0.911831	1.0146	1.00246	1.05955	1.05949	1.11672	1.16287	1.28377	1.24628	1.1792	1.23929	1.28273	1.29867	1.30836	1.33725	1.42106	1.51607	1.41721	1.39868	1.2553	1.17754	1.27362	1.1936	1.11207	1.22001	1.21469	1.287	1.62753	1.55434	1.59631	1.6393	1.67354	2.28764	1.71953	2.98911
0.70045	0.7378	0.673053	0.617822	0.766384	0.67743	0.676878	0.664984	0.690264	0.726509	0.733641	0.743586	0.697705	0.72491	0.735565	0.675112	0.693164	0.672866	0.800248	0.810051	0.79529	0.812579	0.788198	0.748174	0.671076	0.635171	0.612622	0.534294	0.537511	0.540512	0.564197	0.616247	0.624201	0.639186	0.682061	0.660212	0.642441	0.652099	0.667896	0.672531	0.722051	0.774294	0.839788	0.85093	0.841305	0.886162	1.00333	0.917848	0.864162	0.90052
0.614332	0.577852	0.578671	0.607043	0.626963	0.633376	0.66434	0.714346	0.618263	0.570526	0.555371	0.561775	0.577975	0.643461	0.683541	0.649536	0.660072	0.65158	0.643303	0.641024	0.638761	0.604398	0.556904	0.516331	0.499955	0.47759	0.442145	0.491504	0.523804	0.560648	0.639825	0.642633	0.655404	0.65457	0.573007	0.518992	0.562013	0.586115	0.596871	0.598106	0.591647	0.573625	0.562898	0.537487	0.480819	0.487909	0.465803	0.433723	0.401022	0.439298
1.28891	1.24498	1.26575	1.32486	1.09736	1.34565	1.43753	1.53968	1.6127	1.53826	1.555	1.42511	1.39784	1.41558	1.34676	1.40812	1.47534	1.36542	1.23147	1.34042	1.27661	1.07769	1.0822	1.14034	1.11009	1.07817	1.21741	1.19003	1.059	1.09479	1.0593	1.02622	0.917889	0.890997	0.855759	0.8419	0.890166	0.9703	0.935977	1.07442	1.05888	0.970351	0.94997	0.938449	0.906974	0.933363	0.868397	0.8958	0.977972	1.02957
0.766396	0.764176	0.62297	0.751046	0.945412	1.04505	1.16815	0.923244	0.76323	0.650488	0.566768	0.445136	0.747991	2.34015	2.14087	1.97288	1.82932	1.70525	1.75362	1.68236	1.71461	1.60379	1.4688	1.47199	1.37094	1.55152	1.51658	1.45103	1.49854	1.55458	1.53921	1.39112	1.40883	1.34816	1.40756	1.42208	1.49192	1.39203	1.38464	1.34013	1.32399	1.30292	1.19286	1.10192	1.12544	1.04578	0.9819	1.02166	1.09298	1.06471
																																										0.529394	0.519408	0.509791	0.500524	0.494925	0.526042	0.561334	0.286189
0.661771	0.705255	0.792331	0.857618	0.867556	0.961274	1.06557	1.01621	0.961974	1.11363	1.24681	1.22848	1.30255	1.39226	1.43235	1.50209	1.51747	1.44155	1.46263	1.46166	1.40487	1.35482	1.19462	1.0966	1.04587	1.04974	1.11453	1.17248	1.16241	1.15613	1.03654	0.994587	1.20614	1.26691	1.13248	1.08855	0.984182	1.16223	1.24909	1.12882	0.981044	0.906833	0.948525	0.859964	0.895405	0.857324	0.91109	0.935937	1.04509	1.02141
1.71273	1.50828	1.75211	1.38877	1.61673	1.36388	1.56285	1.47496	1.38246	1.20262	1.2483	1.15359	1.13713	1.06918	1.12157	1.12787	1.12456	1.05661	1.05626	1.05591	1.07601	1.09689	1.11859	1.12259	1.13966	1.15726	1.19601	1.0968	1.17265	1.18262	1.14195	1.0828	0.994776	0.94075	0.88619	0.837612	0.76752	0.791435	0.817017	0.819397	0.82845	0.808958	0.844633	0.857111	0.880812	0.892744	0.828421	0.843668	0.87	0.814118
1.80801	1.84433	1.81949	1.82098	1.79865	1.70423	1.61923	1.65465	1.61517	1.51539	1.42678	1.34797	1.32709	1.30685	1.31934	1.3628	1.23049	1.24187	1.33163	1.26434	1.22649	1.31265	1.14042	1.09003	1.15563	1.13615	1.184	1.10998	1.09016	1.07103	1.14924	1.0745	1.00045	0.935949	0.918161	1.01645	0.953365	0.965529	0.968488	0.969388	0.949871	0.874041	0.798779	0.797238	0.785715	0.830359	0.794665	0.761912	0.768054	0.742778
0.842777	0.86088	0.990489	0.987537	0.990779	0.959249	0.929663	0.901847	0.885946	0.849272	0.812827	0.734468	0.711262	0.588854	0.578739	0.620237	0.652929	0.635523	0.598712	0.727785	0.581687	0.568725	0.672857	0.658714	0.645153	0.632139	0.61964	0.513278	0.531676	0.620246	0.580335	0.54525	0.514165	0.486433	0.46154	0.439071	0.454728	0.475333	0.497893	0.434321	0.429281	0.412836	0.402566	0.438672	0.460214	0.482639	0.463251	0.426243	0.423616	0.43211
0.991801	0.962297	0.984662	1.05977	1.00422	1.06394	1.05033	0.968522	0.985999	0.923657	0.911855	0.917404	0.944046	0.889552	0.841007	0.909076	0.894723	0.984295	1.01461	1.04685	1.08121	1.08286	1.06219	1.0423	1.02314	1.00467	0.986859	0.969666	0.953062	1.02216	1.00605	0.990432	0.92242	0.991476	0.802208	0.887577	0.971869	0.909091	1.03873	1.04663	1.03794	1.01295	0.93967	0.950706	0.887352	0.917791	0.910221	0.920563	0.931144	0.891515
0.784079	0.667492	0.734659	0.710879	0.688589	0.664103	0.709453	0.710072	0.74245	0.729384	0.658078	0.666917	0.61264	0.605035	0.608873	0.61276	0.629903	0.601002	0.63956	0.61121	0.58868	0.651345	0.632406	0.65629	0.701288	0.753256	0.803668	0.799504	0.907188	0.931644	0.91782	0.849151	0.758168	0.701354	0.662379	0.619148	0.549141	0.595545	0.566027	0.610731	0.644588	0.670951	0.744707	0.692356	0.685588	0.67895	0.618029	0.594775	0.765604	0.616052
1.10561	1.10566	1.12076	1.05323	1.06769	1.02314	0.982163	0.944341	0.909324	0.876811	0.846543	0.818295	0.791871	0.7671	0.766526	0.745776	0.72612	0.707473	0.68976	0.672912	0.637133	0.594825	0.554569	0.519417	0.63847	0.839832	0.970025	0.993122	1.03937	1.05942	1.0742	1.08939	0.849832	0.943056	0.777764	0.657484	0.569424	0.502166	0.449118	0.46459	0.481167	0.482547	0.526756	0.432211	0.452527	0.479642	0.49212	0.526204	0.573251	0.583939
1.28532	1.21461	1.26067	1.21232	1.29895	1.39036	1.48119	1.54744	1.58544	1.61395	1.55199	1.49369	1.40238	1.27019	1.21872	1.2201	1.21817	1.22495	1.3176	1.25487	1.25358	1.17371	1.1445	1.10085	1.02325	0.971485	1.01405	1.07007	1.10888	1.09456	1.04782	1.00824	0.987468	0.908012	0.873601	0.863605	0.861535	0.859474	0.931308	0.99419	1.03147	1.12996	1.25769	1.41798	1.48947	1.46782	1.4479	1.57332	1.51849	1.40678
0.390219	0.63173	1.65771	1.4832	1.32435	1.26001	1.22032	1.33616	1.49498	1.65697	1.56969	1.36746	1.14251	1.19204	1.07334	1.05478	1.3366	1.12868	0.938659	0.836423	0.857101	0.790855	0.808816	0.829653	0.790853	0.743707	0.746724	0.690321	0.711139	0.753251	0.722618	0.786044	0.769295	0.808705	0.794703	0.925836	0.79317	0.905423	0.864779	0.8727	0.80169	0.799906	0.788833	0.937115	0.799654	0.91932	0.997124	0.962472	0.868829	0.791792
0.463664	0.457829	0.453448	0.445107	0.437288	0.424337	0.408823	0.396604	0.491873	0.409578	0.414865	0.420089	0.417796	0.399554	0.403636	0.387488	0.372583	0.362573	0.35916	0.35482	0.350583	0.351831	0.352286	0.356553	0.360925	0.365405	0.369998	0.374707	0.379539	0.377166	0.375385	0.387953	0.388731	0.389513	0.390297	0.391085	0.391875	0.386186	0.384564	0.382955	0.383881	0.38481	0.383699	0.382221	0.389285	0.419291	0.421675	0.43066	0.440037	0.445965
0.328155	0.349817	0.352981	0.34178	0.353342	0.354364	0.360731	0.367541	0.356506	0.368282	0.362855	0.361169	0.379348	0.386559	0.411639	0.426444	0.402175	0.367475	0.351225	0.336439	0.324799	0.324375	0.323952	0.336621	0.361229	0.388215	0.47477	0.504607	0.533157	0.548732	0.499137	0.467439	0.432198	0.394823	0.38141	0.371515	0.367155	0.373587	0.406819	0.39348	0.418537	0.414946	0.444625	0.427263	0.427987	0.418517	0.424949	0.458379	0.493721	0.50739
0.87418	0.848052	0.784415	0.721143	0.715983	0.71854	0.703481	0.744973	0.814082	0.838824	0.941952	0.847199	0.847173	0.808393	0.81406	0.882397	0.941078	1.00812	0.984696	0.966398	0.948767	0.931768	0.915368	0.955476	0.901253	0.841371	0.883217	0.91257	0.943941	0.977545	0.957624	0.938499	0.892202	0.89439	0.896588	0.881316	0.852566	0.825633	0.808691	0.787392	0.826307	0.857074	0.89022	0.838337	0.816044	0.832415	0.768341	0.74726	0.727305	0.708389
0.336703	0.355018	0.34774	0.33787	0.344389	0.353604	0.34954	0.340874	0.340158	0.373187	0.410818	0.449687	0.454098	0.453675	0.464166	0.426488	0.452767	0.494778	0.545382	0.584509	0.576206	0.599673	0.596198	0.597781	0.639783	0.673532	0.646884	0.685578	0.6708	0.686165	0.626115	0.590329	0.558412	0.554611	0.574738	0.544896	0.544177	0.529869	0.548085	0.529895	0.496389	0.467364	0.441545	0.41843	0.386344	0.383291	0.406958	0.425737	0.40523	0.422453
0.479057	0.532839	0.566763	0.602308	0.631239	0.634913	0.65948	0.609827	0.531927	0.45999	0.470508	0.47098	0.501267	0.53027	0.564839	0.598197	0.635784	0.606478	0.572416	0.520163	0.473466	0.490859	0.509578	0.528277	0.6291	0.619489	0.655098	0.655949	0.600689	0.557962	0.561481	0.577638	0.661707	0.624239	0.648066	0.642908	0.58611	0.476285	0.521737	0.447418	0.505106	0.493975	0.484162	0.498238	0.52352	0.565955	0.592582	0.637219	0.598564	0.679785
0.862135	0.918852	0.967686	1.04441	1.10948	1.11202	1.25667	1.3049	1.32067	1.33682	1.35337	1.37034	1.38773	1.40558	1.42389	1.44268	1.3236	1.16952	1.14142	1.11463	1.08908	1.06467	1.04133	1.01899	0.997589	0.977068	1.02795	1.08441	1.14745	1.21826	1.29839	1.3898	1.32475	1.26553	1.21137	1.28123	1.35964	1.12488	1.02284	0.970996	0.895658	1.17816	0.930853	0.816107	0.845522	0.911743	0.878727	0.866403	0.914837	0.991537
1.73279	1.67248	1.6042	1.65323	1.45557	1.62892	1.49147	1.42567	1.52659	1.45817	1.44154	1.42938	1.37024	1.53009	1.54069	1.53226	1.49318	1.57129	1.54505	1.56104	1.47755	1.43147	1.43081	1.29537	1.29096	1.37924	1.36514	1.32261	1.30667	1.32887	1.34922	1.19736	1.2589	1.30622	1.24151	1.18291	1.13582	1.18549	1.20529	1.23853	1.27366	1.11818	1.3594	1.17391	1.26244	1.16631	1.29761	1.12283	1.06983	1.03157
0.557667	0.556975	0.538611	0.586836	0.644547	0.680222	0.713724	0.710828	0.754091	0.797633	0.778478	0.78765	0.773082	0.759042	0.793777	0.781354	0.769314	0.751521	0.734533	0.74542	0.755839	0.723083	0.732662	0.724937	0.734605	0.749841	0.773139	0.761774	0.767367	0.73043	0.683066	0.648098	0.636658	0.644644	0.664061	0.677022	0.688598	0.711573	0.767166	0.755691	0.727443	0.751854	0.742892	0.718944	0.730709	0.721128	0.712388	0.72882	0.722241	0.766057
12.5881	14.7184	16.8905	13.4584	11.1855	12.3867	10.6089	11.2636	10.7955	10.3647	9.96707	9.59878	9.25674	8.93824	9.18528	9.40158	8.50728	7.20875	8.93803	8.85079	8.4762	8.13203	8.41282	8.71369	9.03688	8.43953	7.91625	7.87567	7.35931	6.44108	6.94227	6.98058	7.01932	7.0585	7.09811	7.13817	7.17868	6.78063	6.88559	6.99385	7.10557	7.22091	7.16918	7.11819	7.27286	7.4344	7.60328	7.78001	7.96516	8.15933
0.607286	0.58415	0.599997	0.588179	0.614445	0.595422	0.562078	0.574621	0.629445	0.580675	0.594889	0.653264	0.621772	0.678095	0.668005	0.589832	0.651787	0.674879	0.638841	0.701175	0.688808	0.709375	0.73228	0.773558	0.805795	0.813346	0.74993	0.733565	0.733438	0.736583	0.723342	0.822137	0.778678	0.782641	0.851896	0.850372	0.864833	0.879794	0.895282	0.873189	0.85216	0.83212	0.813001	0.794741	0.777282	0.760575	0.679088	0.789023	0.6388	0.63561
	0.463534	0.397294	0.371764	0.353639	0.367378	0.349712	0.35664	0.355888	0.346383	0.399344	0.389233	0.380274	0.417131	0.415128	0.424016	0.451823	0.448623	0.438575	0.439766	0.485028	0.530457	0.546091	0.559584	0.549162	0.622543	0.639183	0.73559	0.774481	0.78531	0.85398	0.860864	1.5116	0.94398	0.920085	0.755648	0.745327	0.714747	0.693067	0.672664	0.644158	0.539462	0.565183	0.593707	0.662479	0.648793	0.677358	0.604499	0.819445	0.665672
		7.63123	7.8682	7.38779	8.05376	8.50996	9.02095	9.33121	9.81741	9.30429	8.48091	9.59274	10.4719	11.2545	10.9837	14.3403	14.3778	15.9915	11.8898	10.3643	10.2328	9.68378	9.20153	8.34372	5.86422	7.45699	8.71852	5.76507	6.34412	6.10684	5.80756	5.31505	4.66157	4.15118	4.27503	4.40649	4.5463	4.69527	3.88195	3.77383	4.03272	4.32974	3.71462	3.71457	3.71452	3.71446	3.71441	3.71436	3.71431
			0.965392	1.05749	1.02419	1.09001	1.07913	1.0605	1.00295	0.935376	0.909537	0.819545	0.756705	0.684464	0.676378	0.691901	0.708168	0.713754	0.762243	0.758937	0.806295	0.829671	0.834067	0.829338	0.901542	0.907414	0.913363	0.905485	0.977178	0.923373	0.97903	0.92816	0.940646	0.987936	1.03438	1.00837	1.10993	1.07928	1.09986	1.09593	1.11644	1.05198	0.991222	0.973159	0.889418	0.88834	0.898708	0.859311	0.908992
																																				1.74457	1.72413	1.70416	1.68464	1.51249	1.37226	1.25582	1.1576	1.32125	1.53879	1.84209	1.51107	1.28089	1.11157
			0.715851	0.726066	0.786995	0.764276	0.831047	0.780084	0.799314	0.836829	0.847092	0.868811	0.886517	0.911005	0.866249	0.889674	0.854382	0.891636	0.910268	0.908338	0.919991	0.905667	0.89461	0.881016	0.87296	0.895164	0.863707	0.938315	0.95203	0.840926	0.826855	0.889964	0.961523	0.961722	0.856946	0.933992	0.816061	0.879295	0.850397	0.890082	0.887849	0.842719	0.925534	0.914105	0.857346	0.907499	0.889702	0.87259	0.856124
				0.607647	0.631888	0.581391	0.615541	0.609824	0.602546	0.597379	0.638157	0.766071	0.67163	0.669699	0.657815	0.626199	0.641343	0.661582	0.687854	0.690902	0.721983	0.70779	0.724616	0.710183	0.713881	0.703737	0.69687	0.657297	0.612293	0.580632	0.551295	0.550735	0.544773	0.54417	0.528093	0.532076	0.52496	0.520429	0.505753	0.483047	0.474341	0.466704	0.502824	0.502343	0.541258	0.536319	0.53489	0.516485	0.517189
								0.542235	0.642867	1.02886	0.93792	0.834997	0.752429	0.684722	0.669202	0.978624	0.938699	0.896829	0.896986	0.825561	0.751002	0.718232	0.694117	0.699246	0.704451	0.716029	0.695975	0.677015	0.669058	0.661287	0.571389	0.637105	0.630895	0.642308	0.628103	0.614706	0.620564	0.619321	0.598282	0.578626	0.606529	0.644446	0.570811	0.564016	0.582862	0.603011	0.614492	0.598858	0.542892
										0.519444	0.561409	0.538706	0.539753	0.563321	0.570829	0.57854	0.572288	0.566169	0.49971	0.511704	0.513941	0.516198	0.518475	0.520773	0.520729	0.550964	0.584928	0.583241	0.581565	0.617229	0.658061	0.637466	0.61812	0.600828	0.584478	0.593239	0.602267	0.590951	0.580052	0.569547	0.559417	0.54964	0.5402	0.648904	0.737392	0.722609	0.708407	0.731003	0.747001
																0.595705	0.552279	0.531501	0.497156	0.539665	0.590124	0.54409	0.530186	0.516975	0.497977	0.504342	0.46883	0.507465	0.514998	0.562627	0.529561	0.524246	0.542947	0.515168	0.486807	0.48421	0.472112	0.479365	0.468027	0.46393	0.437694	0.424267	0.429931	0.427907	0.429278	0.409593	0.396209	0.396894	0.389303
																																						1.83915	1.98852	2.26528	2.22551	2.18712	2.149	2.11219	2.07663	2.04224	2.00897	1.97676	1.91258
																																			1.23888	1.18615	1.13773	1.17571	1.10901	1.04947	1.03201	0.972802	1.06743	0.961739	0.875093	0.93272	0.998471	0.873618	0.822084
																																		0.975238	0.902957	0.958575	1.03066	1.08896	1.15426	1.05875	1.05889	1.04539	1.03465	1.05778	1.03535	1.01724	1.01273	1.08373	1.08837
																																										1.058	1.21317	1.16582	1.01984	0.906352	0.867045	0.861449	0.776425
1.52934	1.5311	1.46592	1.52793	1.1897	1.13705	1.59326	1.50294	1.50318	1.54763	1.48597	1.46304	1.47503	1.49009	1.58936	1.80665	1.53991	1.62264	1.735	1.64278	1.66718	1.73392	1.67561	1.63003	1.63277	1.67531	1.64198	1.5137	1.53192	1.46666	1.50744	1.45701	1.48536	1.42645	1.37634	1.43302	1.30619	1.28495	1.31805	1.31251	1.27965	1.31106	1.20787	1.20153	1.18613	1.22241	1.27511	1.19569	1.17302	1.19429
0.968435	0.871092	0.924337	0.787635	0.701975	0.714802	0.594247	0.63233	0.631954	0.602501	0.638382	0.646578	0.670431	0.708004	0.572661	0.582339	0.58144	0.558495	0.568396	0.543037	0.595632	0.637507	0.633374	0.672094	0.735411	0.777703	0.752676	0.786542	0.828029	0.870186	0.855826	0.942411	0.944027	0.959576	1.00184	0.97065	1.02003	1.01493	1.12327	1.07641	1.10523	1.14063	1.11695	1.1058	1.08284	1.14174	1.24929	1.4206	1.56992	1.54292
0.406436	0.42378	0.387205	0.361138	0.349768	0.321226	0.313215	0.297708	0.287197	0.296996	0.30476	0.321576	0.322352	0.351875	0.362641	0.361316	0.364013	0.38028	0.39407	0.390592	0.395319	0.409778	0.436104	0.438683	0.444637	0.451408	0.464101	0.451939	0.435998	0.462404	0.471414	0.474394	0.461441	0.456766	0.442249	0.432628	0.447706	0.473701	0.461221	0.469065	0.466123	0.45409	0.464589	0.462247	0.455604	0.478732	0.488368	0.490666	0.491559	0.512315
0.736244	0.636583	0.619034	0.699843	0.756137	0.675068	0.645678	0.719797	0.613979	0.737953	0.724087	0.740403	0.765408	0.775829	0.673597	0.73904	0.620053	0.596507	0.574683	0.574519	0.562731	0.575256	0.578717	0.583687	0.612317	0.634824	0.645072	0.636502	0.629707	0.640222	0.641237	0.637089	0.676926	0.589906	0.547937	0.579987	0.58338	0.609621	0.591858	0.572558	0.541913	0.51093	0.514921	0.511673	0.493755	0.468954	0.475829	0.554214	0.570065	0.58685
0.798601	0.776419	0.782481	0.836896	0.884806	0.926999	1.00795	0.934668	0.945723	0.921085	0.884453	0.881736	0.879036	0.852053	0.829122	0.814857	0.796574	0.779094	0.707154	0.700944	0.662381	0.654309	0.684969	0.680088	0.67214	0.662603	0.649371	0.680434	0.665681	0.644724	0.596533	0.625118	0.624597	0.619023	0.633792	0.638416	0.617904	0.628325	0.632689	0.645363	0.682254	0.682694	0.736544	0.756603	0.687553	0.606124	0.548821	0.536047	0.550683	0.570348
0.437933	0.461264	0.473534	0.486555	0.509905	0.547661	0.569813	0.591608	0.607845	0.61557	0.657242	0.621473	0.616483	0.629577	0.648417	0.670077	0.663652	0.726201	0.719337	0.694846	0.707765	0.67322	0.672771	0.69369	0.684718	0.6748	0.650113	0.680067	0.670324	0.672702	0.669327	0.688087	0.798355	0.85522	0.748683	0.716245	0.691655	0.73663	0.685604	0.73413	0.698025	0.770257	0.759765	0.660827	0.644697	0.66474	0.675933	0.690362	0.762056	0.688441
0.418525	0.435413	0.461085	0.475732	0.490545	0.5325	0.546172	0.564997	0.561471	0.572618	0.578514	0.558877	0.595757	0.595316	0.576698	0.622282	0.627894	0.66009	0.654505	0.70028	0.660876	0.676562	0.65289	0.669647	0.633971	0.624758	0.634946	0.638937	0.655332	0.646887	0.652233	0.629971	0.634101	0.638286	0.642527	0.658499	0.645267	0.600918	0.60466	0.568613	0.5489	0.54664	0.538721	0.537141	0.536544	0.556431	0.560972	0.558047	0.568816	0.58001
0.98576	1.07792	0.983816	1.03691	1.06239	0.991655	1.00442	0.976262	0.997953	1.04784	1.03822	1.08001	1.09159	1.07235	1.02624	1.03801	1.15036	1.05498	1.13521	1.01122	1.0966	1.0975	1.09839	1.10175	1.08603	1.08684	1.09494	1.02314	1.02846	1.06213	1.09563	1.11977	1.14779	1.04069	1.14096	1.08171	1.07799	1.06146	1.1011	1.14098	1.11644	1.10717	1.15026	1.16531	1.16953	1.04402	1.09781	1.09046	1.09085	1.17366
0.495875	0.548019	0.61242	0.601672	0.680847	0.847272	1.04562	1.36522	1.08074	0.88164	0.808533	0.746623	0.693519	0.647468	0.607152	0.571562	0.651203	0.565674	0.702263	0.823042	0.895864	0.960657	0.949946	1.14433	1.04562	1.10705	1.21756	1.20655	1.26402	1.2505	1.23633	1.30197	1.29825	1.35094	1.35946	1.36422	1.37449	1.51915	1.44326	0.757374	0.513393	0.388304	0.312229	0.336272	0.391096	0.429185	0.421754	0.382063	0.392831	0.424912
																												3.10223	2.89478	2.71334	2.5533	2.95786	2.6456	2.89132	2.70355	2.09823	2.00967	2.21611	2.2911	1.89635	1.59678	1.57637	1.79425	1.89145	1.94466	2.20979	2.20402	2.01429	2.07433
0.443761	0.412267	0.40093	0.392415	0.370481	0.370625	0.382302	0.381023	0.376549	0.396546	0.412575	0.444139	0.437546	0.431145	0.421198	0.421027	0.434078	0.408282	0.412325	0.397444	0.401968	0.396574	0.377134	0.384639	0.420858	0.414421	0.403123	0.405855	0.4104	0.420771	0.451696	0.467725	0.510715	0.536623	0.578053	0.57678	0.603089	0.589227	0.605089	0.571778	0.637151	0.59538	0.567965	0.597638	0.583425	0.569872	0.475932	0.459347	0.516261	0.495504
0.741927	0.752235	0.772988	0.753843	0.758443	0.765278	0.770307	0.790573	0.838035	0.87434	0.819592	0.814861	0.810272	0.84957	0.94362	0.958457	0.997012	0.995253	0.993501	0.976474	0.995974	0.976982	0.894473	0.866289	0.8476	0.836982	0.841174	0.821427	0.83225	0.85201	0.828435	0.848519	0.844125	0.815985	0.816998	0.798755	0.781309	0.764609	0.771653	0.785364	0.796586	0.775307	0.77639	0.822182	0.811518	0.802762	0.820601	0.800042	0.843832	0.85158
0.57881	0.579125	0.573205	0.546123	0.559198	0.567587	0.54658	0.575462	0.607567	0.63521	0.665488	0.80214	0.807626	0.767386	0.747551	0.716463	0.687858	0.61588	0.612275	0.605758	0.603012	0.587318	0.585957	0.562943	0.573794	0.617085	0.639639	0.638765	0.67311	0.622342	0.608932	0.600627	0.559593	0.520788	0.511054	0.508594	0.625177	0.594853	0.677564	0.676799	0.69271	0.678868	0.599342	0.660005	0.585762	0.661674	0.613749	0.65423	0.68815	0.72578
0.652249	0.77242	0.980224	1.05137	1.1775	1.27184	1.38262	1.45841	1.44206	1.37201	1.37174	1.33572	1.28425	1.19731	1.15227	1.1779	1.04179	0.924927	1.03397	0.949545	0.908022	0.919665	0.912815	0.910606	0.960348	0.87817	0.885129	0.793273	0.802494	0.818235	0.820447	0.829024	0.809042	0.712768	0.664262	0.563877	0.532857	0.491946	0.494851	0.50037	0.508458	0.52566	0.544086	0.51725	0.518797	0.548331	0.512483	0.536827	0.558164	0.503209
0.922002	1.0904	1.13575	1.21058	1.32051	1.29419	1.07698	1.17512	1.05934	1.0848	1.35355	1.35729	1.336	1.55294	1.82849	1.69723	0.884377	0.835818	0.936361	0.767244	0.746821	0.864083	0.827195	0.952219	0.940428	1.10503	1.14845	1.42168	1.84432	2.22937	2.6349	2.00149	1.91169	1.82961	2.18134	1.62329	1.90047	1.83897	1.68604	2.03792	2.14758	2.2697	2.37078	2.67523	2.28065	2.15114	2.02183	1.91523	1.96941	2.07888
1.03358	0.985796	1.04083	1.00627	1.00552	0.922717	0.917183	0.938956	0.873046	0.816451	0.788935	0.717023	0.738022	0.700069	0.741682	0.762713	0.774596	0.763259	0.770236	0.782398	0.733558	0.712073	0.683818	0.699742	0.692227	0.743505	0.710026	0.691806	0.671405	0.664734	0.683045	0.674603	0.677411	0.680243	0.683098	0.684549	0.686005	0.687468	0.680912	0.693634	0.710857	0.728956	0.685967	0.715688	0.679713	0.717652	0.711937	0.683581	0.654873	0.685303
5.7616	5.88896	6.93304	6.9039	6.85382	7.22916	6.02729	6.94984	6.68041	4.19417	4.38519	4.59443	4.67103	5.12328	5.7787	6.22221	6.48582	6.23479	5.80363	3.39882	2.90628	2.32789	1.78474	1.64619	1.41679	1.26735	1.18983	1.13895	1.12449	1.1914	1.1293	1.14016	1.14033	1.11137	1.09909	1.11563	1.17993	1.16368	1.19024	1.19548	1.19765	1.22557	1.17021	1.17511	1.15864	1.19251	1.19474	1.21209	1.20676	1.21515
1.08323	0.960438	1.00819	1.08273	1.01825	1.21165	1.20022	1.23599	1.34232	1.22869	1.03907	0.948626	0.892101	0.945782	0.942812	1.19644	0.868194	0.839096	0.815362	0.835546	0.769398	0.751487	0.850522	0.805955	0.723038	0.710859	0.830241	0.764582	0.722763	0.781769	0.956985	0.903025	0.921675	0.932547	0.913094	0.884636	0.886467	0.893821	0.893303	0.844686	0.990095	1.0043	1.00789	0.97616	0.855874	0.927096	0.915998	0.92565	0.842975	0.840538
12.201	9.6387	10.9994	8.98831	7.3588	6.22944	9.14241	17.1725	9.83177	6.88755	5.30032	3.83982	3.01032	6.23011	5.03496	5.31792	5.63457	5.41728	6.93215	6.14631	5.52049	12.7578	8.60966	7.03892	10.2185	6.5578	11.9217	5.96396	18.1654	14.4101	17.2515	21.4887	34.9296	32.7995	30.7845	30.0817	38.183	30.3746	29.5496	25.6912	29.6123	25.1805	30.1259	27.9938	25.3423	25.5087	20.8142	20.1253	26.4414	26.0256
1.47801	1.5458	1.74676	1.67969	1.61759	1.6737	1.72361	1.58901	1.50729	1.51526	1.46186	1.44802	1.4287	1.39524	1.5239	1.44756	1.52728	1.49445	1.463	1.43285	1.40392	1.5032	1.47144	1.50365	1.5373	1.57249	1.68785	1.72015	1.59042	1.69653	1.81781	1.90092	1.91605	1.93143	1.87803	1.88948	2.0485	1.91035	1.99268	1.77115	1.717	1.60229	1.6672	1.70705	1.66169	1.50559	1.52941	1.56209	1.51587	1.40609
1.73085	2.31415	1.57225	1.91142	2.10523	2.1302	1.66955	1.3727	1.43094	1.36803	1.31043	1.25748	1.20864	1.16346	1.12153	1.08252	1.04613	1.01211	1.02249	1.01576	0.963702	0.953979	0.950671	1.02147	0.966106	0.972768	0.979522	1.3477	1.15559	1.0092	1.11327	1.17974	1.25465	1.33972	1.6256	1.4333	1.28168	1.86143	1.22012	1.96561	1.91855	1.85556	1.28115	1.21206	1.83543	1.25587	1.20874	1.16652	1.33465	1.08195
1.0275	1.12009	1.1018	0.962945	1.07343	1.06457	1.05585	1.04298	0.885184	0.76886	0.666293	0.601216	0.54772	0.664883	0.763937	0.811423	0.849641	0.769088	0.956573	1.01175	0.999504	0.992443	1.06914	1.12471	1.01134	0.865676	0.814156	0.739154	0.751821	0.677309	0.590618	0.584481	0.579377	0.616231	0.658093	0.749824	0.806208	0.802062	0.788576	0.834137	0.811393	0.827695	0.819966	0.846161	0.847446	0.883861	0.889678	0.930976	1.00649	1.01872
																											1.28661	1.48278	1.74951	2.13327	1.7164	1.43583	1.55958	1.60453	1.75264	1.60875	1.72119	1.64453	1.68847	1.71086	1.8764	1.93446	1.99622	1.85955	2.06488	1.8568	2.01707	1.78168	1.86169
1.75437	1.69991	1.78253	1.64216	1.44512	1.53401	1.4821	1.43359	1.38816	1.33722	1.28989	1.45249	1.48706	1.62757	1.56567	1.52373	1.48398	1.33244	1.20899	1.10647	1.01998	0.94603	0.882078	0.826226	0.777025	0.751558	0.727707	0.705323	0.667289	0.707096	0.669841	0.636315	0.620334	0.605137	0.590666	0.580428	0.57054	0.560983	0.57208	0.547545	0.525027	0.504288	0.526421	0.57458	0.476231	0.522143	0.496603	0.573025	0.473168	0.574651
																																	0.65935	0.574774	0.565847	0.557194	0.502995	0.611984	0.683219	0.620716	0.56869	0.572034	0.575419	0.717611	0.953143	0.990336	1.03055	1.07417	1.12164
																																0.944714	0.983393	0.914226	0.791533	0.697876	0.979298	1.2866	1.37007	2.05086	1.97281	1.0132	0.812662	0.817431	0.993476	0.916106	1.43741	1.25759	1.20961
0.866664	0.93481	0.877511	0.893743	0.910587	0.928078	0.946255	0.965157	1.03769	0.886637	0.947038	1.01627	0.966608	0.921573	0.880548	0.880875	0.881202	0.88153	0.881858	0.882186	0.914999	0.950348	0.943221	0.926015	0.920568	0.929309	0.937368	0.945567	0.968765	0.993129	0.917024	0.971862	0.917713	0.940258	0.963938	0.975054	0.98643	1.04087	1.05515	1.02302	0.998338	1.01446	1.03112	0.964602	0.977983	0.99174	0.951571	0.933404	0.92357	0.914171
1.04571	1.03986	1.0774	1.04942	1.01132	1.00181	1.05683	1.00523	0.841961	0.739084	0.76794	0.779504	0.814944	0.705678	0.678358	0.687396	0.696678	0.626029	0.670429	0.69149	0.732328	0.895447	0.857577	0.82278	0.790696	0.778298	0.764478	0.75114	0.746422	0.75963	0.74784	0.736411	0.765273	0.751701	0.726581	0.740034	0.722772	0.749548	0.533149	0.646388	0.634418	0.613667	0.825754	0.641795	0.670739	0.687848	0.761803	0.671322	0.691433	0.629538
0.921016	0.717787	0.74977	0.741683	0.737211	0.759239	0.977569	0.919781	0.868443	0.915352	0.860965	0.857286	0.843757	0.807903	0.862249	0.83319	0.945737	0.844479	0.849562	0.922657	0.798501	0.844065	0.800167	0.760609	0.724778	0.82111	0.814104	0.661686	0.677254	0.623203	0.76569	0.654984	0.791962	0.710111	0.605545	0.645089	0.685307	0.585986	0.653968	0.658292	0.673065	0.572491	0.550655	0.53852	0.526908	0.525104	0.548736	0.532043	0.516335	0.523262
							3.21776	1.80403	2.88218	2.08211	2.21253	0.950911	1.06596	1.00314	1.52501	3.21713	4.01299	3.67742	3.33076	3.04383	3.07734	3.63379	2.83655	3.68339	3.67102	1.15005	1.77332	3.87151	3.91182	3.27272	3.47361	4.18398	3.04894	2.05105	1.203	2.55506	2.10166	1.97129	2.23827	2.02742	1.85287	2.7765	3.18745	2.86948	3.6618	3.38675	2.8934	3.74722	5.86333
0.34904	0.341665	0.365238	0.357208	0.437175	0.438696	0.509344	0.445492	0.420631	0.446998	0.45827	0.439357	0.471695	0.479348	0.50162	0.501416	0.515986	0.508609	0.513145	0.516245	0.523043	0.542695	0.542352	0.511202	0.524831	0.547567	0.547628	0.524453	0.538882	0.537	0.534195	0.512602	0.520527	0.536806	0.530315	0.554905	0.583232	0.575134	0.58126	0.592726	0.562016	0.560592	0.580166	0.535976	0.5796	0.593152	0.594111	0.617418	0.627789	0.654078
2.01535	1.97023	1.87096	2.07759	2.04391	1.96382	1.90065	1.79946	1.50276	1.55118	1.49308	1.4646	1.66352	1.85878	2.5476	2.47614	2.02623	1.71694	1.66331	1.54878	1.98781	2.0148	1.7593	1.84951	1.69109	1.97702	1.62016	1.60245	1.86248	1.80435	1.8273	1.74503	1.94036	2.12144	1.81309	2.06115	1.86131	1.90624	2.09138	1.60327	1.58441	1.28604	1.54431	1.63241	1.49361	1.54758	1.40084	1.24478	1.34434	1.13552
0.596291	0.594979	0.594824	0.614181	0.625001	0.627095	0.629943	0.633235	0.658335	0.648019	0.662532	0.628739	0.63408	0.657754	0.684025	0.647921	0.615437	0.586055	0.607573	0.585997	0.550184	0.509602	0.518852	0.46497	0.449758	0.464675	0.422606	0.429598	0.436825	0.454516	0.462272	0.471866	0.467385	0.514019	0.532331	0.552607	0.508787	0.494971	0.516431	0.453995	0.448591	0.456022	0.430912	0.438874	0.454834	0.443553	0.443339	0.446848	0.450412	0.454034
0.776463	0.771499	0.772013	0.7837	0.784546	0.749005	0.745516	0.779666	0.779258	0.77885	0.778443	0.778036	0.777629	0.772775	0.759623	0.778802	0.798975	0.789266	0.77979	0.773585	0.772099	0.776911	0.781784	0.786719	0.791716	0.796777	0.79828	0.799789	0.797936	0.796295	0.789498	0.7886	0.801535	0.785639	0.798634	0.79281	0.786355	0.834912	0.88986	0.768164	0.99767	0.968079	1.00229	0.786046	0.912653	0.878944	0.847636	0.831633	0.816224	0.801375
1.42819	1.32194	1.34979	1.36017	1.36291	1.36566	1.31686	1.23348	1.31305	1.28292	1.25415	1.2098	1.12403	1.15717	1.08174	1.40178	0.970978	1.20191	0.940375	1.03173	1.03733	1.66169	1.43081	1.27841	1.09267	1.0187	0.946427	0.927984	0.886154	0.984348	1.09714	1.11997	0.953458	1.02783	1.13586	1.10815	1.01149	1.00262	1.14231	1.12895	1.11589	0.844445	0.991364	0.85623	0.765092	0.680955	0.698388	0.716737	0.641726	0.632758
												0.694082	0.700657	0.740412	0.738813	0.750609	0.733055	0.691151	0.653778	0.66867	0.703305	0.687386	0.709572	0.666238	0.667988	0.669747	0.688333	0.708779	0.730476	0.753544	0.778116	0.604107	0.643197	0.687697	0.738811	0.804532	0.836488	0.794536	0.75659	0.722104	0.690625	0.730978	0.801616	0.77209	0.760022	0.723559	0.846603	0.766205	0.744437
0.578909	0.636516	0.604629	0.50031	0.701989	0.626272	0.565298	0.487857	0.547921	0.667333	0.613107	0.617027	0.628493	0.685653	0.766661	0.788881	0.78065	0.917107	0.882787	0.981716	1.07543	1.32132	1.32793	1.29527	1.30094	1.13661	1.07307	0.941535	0.907737	0.817924	0.793918	0.755106	0.82759	0.72972	0.731886	0.710507	0.743588	0.779901	0.819942	0.987288	0.811241	0.828644	0.84681	0.814486	0.755259	0.867783	0.811695	0.762418	0.804396	0.776723
2.04792	1.99293	1.8465	1.38811	1.11205	0.829968	0.842504	0.855424	0.868747	1.28215	2.4462	2.68416	2.76478	2.5627	2.4414	2.33106	2.11584	2.08178	2.0488	2.01684	1.60602	1.63909	1.70122	1.76824	1.73192	1.69705	1.66357	1.61821	1.1047	1.29101	1.5529	1.5018	1.76528	1.44897	1.34867	1.39452	1.1738	1.31439	1.44505	1.43982	1.27105	1.35758	1.45677	1.2685	1.46755	1.40463	1.34536	1.21065	1.16182	1.1789
0.828964	0.815216	0.789252	0.78841	0.816882	0.786803	0.786262	0.748906	0.732006	0.772722	0.767779	0.832692	0.816468	0.785926	0.76472	0.766441	0.762824	0.697107	0.694919	0.720503	0.691703	0.681694	0.671971	0.636663	0.60488	0.618951	0.737672	0.700593	0.667964	0.666988	0.718859	0.761873	0.676715	0.718363	0.619492	0.63943	0.671327	0.706574	0.733902	0.710075	0.666508	0.627977	0.682851	0.659839	0.677603	0.69635	0.716164	0.737139	0.75938	0.783004
0.35821	0.355434	0.367167	0.367514	0.394526	0.403021	0.447033	0.454265	0.444288	0.419138	0.396683	0.416082	0.437476	0.46119	0.487622	0.509202	0.478153	0.450673	0.370552	0.314619	0.302266	0.290846	0.280258	0.305275	0.335196	0.353317	0.348454	0.343207	0.309748	0.290731	0.262571	0.258087	0.248353	0.247091	0.245841	0.254386	0.248355	0.245512	0.267047	0.362078	0.56211	0.585594	0.611126	0.638985	0.648591	0.632842	0.646307	0.656977	0.62395	0.600632
0.391632	0.401186	0.405053	0.408996	0.413017	0.417117	0.421299	0.392491	0.364845	0.394464	0.419139	0.492717	0.642299	0.540343	0.466322	0.487964	0.473698	0.548006	0.547773	0.587258	0.606078	0.64844	0.646173	0.663436	0.672286	0.752954	0.752269	0.751585	0.727404	0.721513	0.715717	0.710013	0.704399	0.698874	0.693434	0.688078	0.701151	0.71473	0.728845	0.743529	0.758817	0.774747	0.79136	0.808701	0.814367	0.820112	0.82594	0.83185	0.837846	1.18656
	1.61393	1.09572	1.26976	1.32866	1.32932	1.32819	1.36274	1.63375	1.50984	1.57699	1.6504	1.77027	1.92539	1.87624	1.77225	1.82679	1.88478	1.82943	1.56647	1.61034	1.80544	1.21952	1.10164	1.14525	1.04406	0.915949	0.914498	0.865248	0.824278	0.871281	0.915071	0.90833	1.82043	0.952992	0.986891	0.796	0.816419	0.837913	0.865458	0.894875	0.926363	0.984692	0.941072	0.989298	0.937254	1.03465	1.44741	1.08317	1.12853
	1.50155	1.92311	1.9761	1.89138	1.5347	1.22856	0.875353	0.905581	0.8604	0.876475	0.721826	0.81749	0.802519	0.796763	0.737132	0.66401	0.672187	0.752136	0.866133	0.814312	0.903587	0.860148	0.868995	0.802807	0.757535	0.722656	0.679758	0.655114	0.597973	0.592032	0.545975	0.574289	0.599501	0.559531	0.555361	0.548012	0.532704	0.53204	0.542313	0.53415	0.573938	0.565513	0.574184	0.527094	0.51566	0.508393	0.582785	0.518457	0.560049
																														0.382104	0.351838	0.346424	0.35548	0.352677	0.365507	0.379306	0.393241	0.414902	0.427973	0.433385	0.407109	0.410554	0.406819	0.40251	0.41288	0.389275	0.401533	0.385783	0.388122
		0.823997	0.763134	0.714389	0.663675	0.662511	0.706531	0.702358	0.683727	0.697237	0.733413	0.741885	0.892833	1.00137	0.893623	0.640259	0.930255	0.991853	1.05782	1.16061	1.17642	1.19441	1.24075	1.23249	1.14532	1.11571	1.04208	1.01664	1.00765	1.03392	1.0191	1.09144	1.11397	1.1041	1.09752	1.09658	1.05714	1.19505	1.15481	1.28477	1.23559	1.34222	1.35788	1.36447	1.43108	1.42647	1.39196	1.35907	1.28526
		2.58061	2.48819	2.52441	2.47132	2.15769	2.2305	2.57264	2.56167	2.92802	1.22504	1.0914	0.920687	1.0025	0.78285	0.888683	0.845669	0.875194	0.912297	1.26836	1.31318	1.33276	1.35292	1.6727	2.615	1.78658	2.73226	2.96601	2.94199	2.27347	2.43614	2.62388	2.27138	1.981	1.77957	1.61532	1.47882	1.3636	1.26504	1.17976	1.10525	0.939406	0.988127	0.683346	0.620716	0.568603	0.702818	0.712579	0.730657
			0.396952	0.418888	0.443391	0.477181	0.477501	0.466327	0.429205	0.391611	0.393291	0.394986	0.396695	0.39842	0.433981	0.383742	0.361652	0.399399	0.405749	0.412304	0.459889	0.512134	0.511711	0.554864	0.551946	0.597879	0.613867	0.65348	0.685376	0.675979	0.64477	0.616315	0.590266	0.56633	0.544259	0.543328	0.542401	0.506123	0.501845	0.517006	0.53587	0.523808	0.506168	0.506798	0.50743	0.508063	0.508698	0.509335	0.540056
		0.466571	0.450803	0.477661	0.461982	0.457164	0.481295	0.491332	0.518251	0.493888	0.534353	0.528456	0.580423	0.584927	0.572001	0.594304	0.564261	0.585657	0.602048	0.619383	0.590406	0.566343	0.573961	0.468609	0.480286	0.507609	0.483746	0.507534	0.513835	0.479004	0.485614	0.458671	0.479958	0.485154	0.495512	0.532953	0.485774	0.48543	0.534541	0.538044	0.545999	0.544077	0.559896	0.54078	0.522926	0.438901	0.437386	0.447228	0.527272
			0.639355	0.68414	0.724553	0.72095	0.744245	0.736182	0.713809	0.734118	0.66638	0.637858	0.63818	0.632351	0.636386	0.640474	0.585758	0.585376	0.562096	0.549177	0.536839	0.525043	0.497738	0.485466	0.481227	0.502603	0.484084	0.441587	0.448721	0.426756	0.435476	0.369665	0.325288	0.334771	0.325008	0.305775	0.294135	0.290785	0.307703	0.31588	0.331464	0.352725	0.404667	0.404357	0.380868	0.408338	0.386052	0.3893	0.373776
																																										0.736451	0.803985	0.885157	0.91272	0.974803	0.937764	0.919394	0.821863
			0.464639	0.44353	0.451736	0.517442	0.605515	0.785675	0.77902	0.837855	0.906302	1.01268	1.24574	1.63923	1.85612	2.07972	1.9849	2.09967	2.12985	2.17427	2.1089	2.22586	1.86324	1.81545	1.68977	1.78347	1.74211	1.90095	1.78247	1.84763	1.6813	1.90584	2.0364	1.92025	1.64743	1.7996	2.17915	2.06773	2.24553	2.26322	2.0583	1.99357	2.00148	2.31749	2.23724	2.42874	2.04461	2.0399	1.75647
			0.729461	0.880086	0.939604	0.800134	0.760286	0.827127	0.912383	0.873122	0.85984	0.805255	0.757186	0.71274	0.710545	0.746589	0.773237	0.719408	0.734149	0.779737	0.769435	0.774508	0.772678	0.798437	0.818564	0.867957	0.812344	0.85603	0.826307	0.870627	0.919969	0.913797	1.00617	1.11931	0.943813	1.05676	1.09034	1.12613	1.01763	1.08769	1.04779	1.0859	1.12688	1.27083	1.30796	1.35846	1.33465	1.35716	1.38045
				0.656896	0.685953	0.721868	0.663936	0.746519	0.764895	0.761242	0.780057	0.791518	0.76303	0.736521	0.774769	0.817207	0.788776	0.66275	0.675719	0.660338	0.645642	0.631585	0.656114	0.688538	0.620864	0.699695	0.693023	0.738041	0.683609	0.656981	0.678201	0.760524	0.763047	0.765727	0.768425	0.781345	0.826267	0.828446	0.866582	0.791265	0.780237	0.844159	0.921194	0.944837	1.00603	1.04745	0.983169	1.01085	0.967145
				0.685965	0.732133	0.851346	0.661444	0.691418	0.594978	0.596957	0.597269	0.645286	0.749051	0.789106	0.885789	0.822481	0.84965	0.877611	0.913235	0.890168	0.805784	0.736013	0.710037	0.670258	0.624536	0.690192	0.682133	0.678245	0.694609	0.69378	0.721625	0.70707	0.707121	0.707172	0.673385	0.692321	0.694469	0.696631	0.698806	0.700995	0.661909	0.626951	0.595501	0.567055	0.541203	0.542987	0.567543	0.588549	0.563871
						1.38007	1.36726	1.35254	1.33435	1.29738	1.2624	1.2626	1.25519	1.18497	1.18198	1.179	1.17604	1.17309	1.17016	1.16724	1.11835	1.13744	1.15719	1.17764	1.21364	1.25192	1.29269	1.34205	1.39532	1.453	1.41877	1.36105	1.46657	1.58984	1.52784	1.47051	1.45389	1.31069	1.18995	1.13764	1.34205	1.38217	1.18692	1.26655	1.25353	1.23384	1.22986	1.13012	1.12363
									0.631028	0.724274	0.682854	0.686286	0.667352	0.717211	0.748407	0.732326	0.765152	0.763987	0.764999	0.784877	0.780704	0.758795	0.73455	0.765894	0.778675	0.73958	0.755887	0.772929	0.774956	0.746624	0.756589	0.765012	0.750661	0.751272	0.750367	0.742838	0.734092	0.748658	0.719704	0.697611	0.676834	0.663865	0.689806	0.68981	0.662517	0.677655	0.675726	0.694792	0.701347
																																										0.701699	0.686436	0.686797	0.687159	0.723279	0.690324	0.611469	0.67132
																		0.567454	0.535187	0.533114	0.558396	0.568447	0.617607	0.626541	0.65477	0.650523	0.659491	0.679015	0.661475	0.64932	0.632353	0.636222	0.640138	0.627731	0.651521	0.686199	0.713642	0.712872	0.63889	0.705958	0.790852	0.799332	0.776162	0.810302	0.82237	0.849078	0.837352	0.825946	0.819506
																								1.29135	1.17353	1.12446	1.05766	0.826273	0.697807	0.603913	0.643163	0.598387	0.658291	0.663488	0.685009	0.62699	0.661627	0.648244	0.662727	0.736099	0.780637	0.682491	0.773228	0.760429	0.844062	0.742909	0.65673	0.573982	0.591332
																													0.68704	0.684093	0.72311	0.709734	0.678946	0.650718	0.573775	0.575411	0.541405	0.474418	0.526139	0.488218	0.556889	0.56019	0.550146	0.529828	0.510958	0.47349	0.467197	0.471806	0.476506
																																			0.378293	0.413798	0.359747	0.425559	0.520841	0.453377	0.401385	0.33914	0.298025	0.318896	0.290513	0.350873	0.393537	0.410615	0.351417
																																			0.662026	0.936215	0.958668	0.732586	0.813458	0.9144	1.04394	0.842172	0.769516	0.777812	0.786288	0.772573	0.759327	0.793317	0.727252
2nd Tx dose: 1ng INS
0.627163	0.597824	0.604789	0.594271	0.618057	0.617737	0.616935	0.618392	0.632268	0.605533	0.653557	0.68246	0.651382	0.66913	0.694623	0.714411	0.72219	0.757215	0.714789	0.743789	0.706383	0.686713	0.724125	0.701357	0.678168	0.706052	0.736149	0.746006	0.771204	0.76235	0.74267	0.770446	0.779899	0.778128	0.711511	0.712312	0.682811	0.703847	0.71485	0.68743	0.644708	0.675653	0.676611	0.702615	0.697454	0.67206	0.71261	0.720533	0.694884	0.756283
0.552818	0.557641	0.516372	0.538311	0.50957	0.489925	0.445845	0.425792	0.433483	0.450557	0.427214	0.398514	0.386158	0.388059	0.398828	0.380929	0.388382	0.414153	0.416563	0.412037	0.43356	0.445527	0.470028	0.478934	0.478355	0.468075	0.471612	0.465281	0.456962	0.4514	0.423277	0.417265	0.426686	0.405732	0.419771	0.418846	0.412545	0.421806	0.407047	0.405952	0.390609	0.392941	0.404783	0.405935	0.390166	0.38209	0.386931	0.379625	0.401045	0.396804
0.895812	0.890234	0.936178	0.960132	1.00135	1.0604	1.12622	1.22294	1.31115	1.36788	1.38735	1.37895	1.37047	1.35941	1.37443	1.42993	1.43539	1.38633	1.35547	1.29099	1.20508	1.10446	1.04868	0.99932	0.95134	0.979704	0.973743	1.01311	1.01957	1.09057	1.04582	1.1742	1.2425	1.29419	1.39477	1.44872	1.42242	1.51492	1.41664	1.30936	1.35582	1.37139	1.37279	1.38991	1.31857	1.17269	1.09082	1.09251	1.08309	1.0676
0.370508	0.385158	0.412398	0.416838	0.476812	0.526597	0.57695	0.611502	0.619707	0.613047	0.625659	0.650995	0.655116	0.609337	0.57583	0.586864	0.543489	0.554089	0.539691	0.533917	0.54041	0.572509	0.540999	0.535991	0.552001	0.569295	0.631676	0.640575	0.666869	0.627066	0.651274	0.701559	0.668579	0.620793	0.664516	0.608529	0.590997	0.587806	0.553034	0.517722	0.576097	0.571535	0.55031	0.537006	0.533323	0.516294	0.501024	0.491757	0.52398	0.461194
																								2.04851	1.70434	1.45918	1.95895	1.90292	2.0553	1.9795	1.8062	2.15273	1.75085	2.19516	2.24431	2.15169	2.21307	2.00736	2.08249	1.97778	1.92034	2.18635	1.90212	1.87669	1.77947	2.0506	1.96088	2.39121	1.94541
0.984224	1.16588	1.22909	1.24325	1.31935	1.40979	1.65708	1.64883	1.66892	1.44485	1.36034	1.41266	1.37839	1.34573	1.46482	1.60704	1.77984	1.6467	1.86959	1.87435	1.68775	1.73316	1.67801	1.74428	1.6333	1.59478	1.75147	1.55776	1.59029	1.63382	1.77916	1.77802	1.7443	1.55541	1.42545	1.38243	1.44541	1.31479	1.29863	1.21588	1.10847	1.02341	0.973533	0.910601	0.922413	0.942266	0.942621	0.898191	0.892061	0.837119
1.21057	1.18213	1.06505	0.997426	1.06319	1.07762	1.04812	0.968057	0.929154	0.931213	0.923848	0.783026	0.761078	0.795572	0.849391	0.998132	1.08119	1.0364	0.969795	0.93531	0.845743	0.826531	0.797152	0.88667	0.862811	0.810573	0.805756	0.801286	0.82848	0.848297	0.885245	0.925392	0.972864	1.02054	1.15621	1.25264	1.30831	1.3536	1.42108	1.41019	1.33098	1.27389	1.30567	1.23138	1.20791	1.12904	1.0908	1.05282	1.02667	1.02417
0.67488	0.676204	0.653221	0.604522	0.56681	0.533502	0.536083	0.534326	0.56878	0.607985	0.653431	0.680565	0.700276	0.700526	0.775311	0.819353	0.835524	0.922579	0.952906	0.996587	1.05074	0.979801	0.913609	0.922191	0.892518	0.812145	0.797016	0.748157	0.664937	0.647929	0.634818	0.648614	0.646608	0.67173	0.672922	0.715225	0.779954	0.743497	0.760077	0.784639	0.80873	0.831909	0.797216	0.768644	0.695761	0.635502	0.612895	0.617014	0.617057	0.641695
0.984079	0.993774	1.00179	0.97189	0.971235	0.953365	0.916035	0.886073	0.8712	0.856819	0.842904	0.707785	0.67494	0.717059	0.750422	0.732007	0.74936	0.647793	0.713734	0.77109	0.880374	0.872164	0.882336	0.81676	0.863703	0.87691	0.881131	0.899814	1.0538	1.05294	1.05424	1.03838	1.03954	0.963768	0.943499	0.883565	0.903366	0.881423	0.841793	0.800421	0.773288	0.766698	0.749802	0.788967	0.751267	0.738584	0.706468	0.664674	0.651975	0.686169
1.10523	1.23443	1.18401	1.19855	1.11724	1.15493	1.17128	1.12739	1.17265	1.22561	1.22998	1.157	1.09221	0.979472	0.89589	0.87533	0.894822	0.948084	1.00809	1.02283	1.05131	1.11104	1.07808	0.962595	0.98038	0.947851	0.998521	1.03765	1.024	1.03764	1.06835	1.02019	1.02685	1.10689	1.05259	1.07965	1.08211	1.11616	1.09378	1.07337	1.09117	1.17917	1.17207	1.23636	1.20713	1.0306	1.12653	1.16446	1.1887	1.14768
1.19987	1.36379	1.12323	1.05827	1.47175	1.6578	1.68873	1.45523	1.50283	1.26002	1.21562	1.3791	1.42814	1.40187	1.42319	1.85232	1.83417	2.01491	1.73235	1.54844	1.54441	1.42175	1.08899	1.17384	1.40119	1.38944	1.52182	1.55229	1.58401	1.61705	1.35148	1.34272	1.33408	1.15196	1.22963	1.19995	1.17167	1.14469	1.11893	1.0943	1.18586	1.12579	1.07151	1.17301	1.29577	1.42229	1.47166	1.46436	1.26979	1.18211
0.493438	0.523005	0.508144	0.579798	0.736547	0.836694	0.913101	0.741022	0.650629	0.6437	0.596835	0.633312	0.738161	0.679738	0.747057	0.702521	0.604252	0.645886	0.582238	0.525954	0.514528	0.560059	0.555305	0.561955	0.617288	0.602595	0.60019	0.637201	0.664855	0.721195	0.652231	0.64841	0.641901	0.625174	0.646275	0.62129	0.617479	0.620949	0.639702	0.610888	0.618511	0.622339	0.611606	0.601075	0.58827	0.597095	0.715863	0.58788	0.590539	0.608232
0.892163	0.911001	0.871615	0.884632	0.909879	0.921918	0.866779	0.86786	0.903311	0.891278	0.832328	0.777497	0.83893	0.800068	0.832345	0.759518	0.715205	0.743345	0.778651	0.808498	0.914361	0.923883	1.06649	1.04688	1.08571	1.06089	1.03411	1.09471	1.12145	1.11025	1.12607	1.11167	1.06776	1.04782	1.02127	0.988416	0.87676	0.902685	0.932973	0.966692	1.04577	1.08845	1.10403	1.11539	1.08777	1.06148	1.0451	1.01121	0.995754	0.989207
0.487977	0.51852	0.568366	0.61968	0.758677	0.795247	0.835522	0.880094	0.803111	0.77474	0.758051	0.712364	0.705972	0.712234	0.790798	0.796027	0.795791	0.745307	0.675133	0.605696	0.574545	0.575834	0.597937	0.610682	0.617321	0.603965	0.637895	0.663602	0.709917	0.706848	0.70002	0.723427	0.682434	0.689517	0.67327	0.663935	0.672528	0.675428	0.655833	0.643738	0.647959	0.636071	0.632402	0.633084	0.657072	0.682889	0.707998	0.735023	0.729177	0.741501
0.886315	0.928354	1.05382	1.09415	0.984704	0.968295	1.02661	1.06998	1.0011	0.990205	0.979548	0.969119	0.958909	0.953863	0.948869	0.943928	0.930414	0.928325	0.873675	0.938032	0.983242	0.995706	0.935586	0.933049	0.870339	0.861272	0.949838	0.902756	0.836905	0.824129	0.889496	0.880888	0.814295	0.839756	0.80021	0.821573	0.785658	0.844867	0.867745	0.909408	0.988326	0.976117	0.9187	1.03091	0.986486	0.860528	0.847471	0.778488	0.788033	0.788863
2.58422	2.57227	2.56044	2.54871	2.53709	2.15266	2.11218	2.0732	2.18262	2.10679	1.81825	1.87776	1.96832	1.97302	1.9085	2.04518	1.95492	1.95698	1.98377	1.83632	1.97756	1.91931	1.80253	1.70368	1.53909	1.51924	1.42886	1.39583	1.28832	1.42604	1.33106	1.36766	1.38016	1.48182	1.46804	1.38625	1.42175	1.3613	1.38528	1.30686	1.24118	1.19638	1.18944	1.10088	1.16975	1.17163	1.13021	1.10762	1.14978	1.16791
0.615131	0.623392	0.701085	0.754498	0.718285	0.748093	0.747198	0.792381	0.768975	0.785592	0.771883	0.722159	0.693947	0.705658	0.666328	0.586863	0.627967	0.624482	0.628148	0.666628	0.673809	0.715143	0.695306	0.728299	0.757521	0.74233	0.727735	0.713704	0.71535	0.684841	0.669876	0.660103	0.647118	0.662867	0.669413	0.700678	0.674443	0.663668	0.660719	0.652768	0.663726	0.675057	0.665678	0.70737	0.754633	0.770738	0.743039	0.736	0.699234	0.665967
0.851879	0.85167	0.5661	0.423948	0.514337	0.653713	0.725042	0.669583	0.699263	0.741626	0.694598	0.702677	0.628966	0.612634	0.693354	0.6528	0.716162	0.735246	0.787502	0.810949	0.788585	0.762722	0.822833	0.868823	0.996219	1.09177	1.1838	1.2005	1.14554	1.23911	1.17357	1.28161	1.21855	1.24396	1.22449	1.13077	1.07827	1.03143	0.974652	0.897414	0.970603	1.04479	1.09168	1.11287	1.08611	1.00181	0.972979	0.945761	0.890598	0.881237
										2.45025	2.48271	2.8751	3.41481	4.20397	5.4675	7.92848	7.04927	8.0029	8.70222	8.16492	7.45863	3.65088	4.21933	4.70701	4.44868	5.81012	7.44065	7.88681	8.38988	7.71976	6.8316	7.16862	7.85439	6.74965	6.08348	8.86435	6.65096	7.65753	9.09588	7.86315	7.93751	7.05207	9.52021	13.6639	8.9773	8.44809	10.5016	8.22933	8.13728
	0.696104	0.616251	0.667447	0.875137	0.84137	0.836822	0.835753	0.860023	0.794513	0.774444	0.871885	1.04526	1.0647	1.05142	1.03594	1.03894	0.908346	0.872941	0.809357	0.851094	0.821823	0.78254	0.724006	0.692575	0.680099	0.630783	0.634584	0.539163	0.544755	0.522022	0.559702	0.593155	0.591718	0.62274	0.630095	0.637626	0.702896	0.783053	0.883846	0.770656	0.849588	0.836745	0.824285	0.880508	0.898038	0.939728	0.985477	0.99867	1.06764
0.652331	0.737763	0.806653	0.839951	0.876117	0.842013	0.916837	0.913618	0.910422	0.872701	0.815545	0.72548	0.65333	0.641645	0.695438	0.759076	0.835534	0.847651	0.913424	1.02803	1.04391	0.978537	0.910033	0.82298	0.751127	0.690813	0.657053	0.690391	0.741187	0.834137	0.905919	0.962043	0.906788	0.945478	0.99775	1.02337	1.00185	0.99604	0.884266	0.882774	0.858436	0.831914	0.717533	0.630803	0.623463	0.616292	0.606777	0.598996	0.609741	0.620186
0.70805	0.701242	0.704666	0.697163	0.723952	0.769721	0.7924	0.904475	1.03293	1.23612	0.631052	0.42367	0.35705	0.361128	0.395657	0.437489	0.489211	0.554802	0.640706	0.670173	0.702482	0.793914	0.820131	0.879303	0.947676	0.926718	0.906666	0.887463	0.929832	0.976449	0.950441	0.873735	0.875599	0.916027	0.904969	0.914549	0.924334	0.913734	0.934648	0.956543	0.979488	1.00356	0.927466	0.922103	0.976641	0.931957	0.891183	0.853827	0.965392	0.757454
0.74293	0.756766	0.958443	1.06938	1.05275	1.03663	1.021	1.00583	0.991108	1.03315	1.01472	1.03165	1.06996	1.03309	0.975802	1.01666	0.98452	1.08535	1.07196	1.19571	1.20893	1.3191	1.43307	1.53524	1.36067	1.38246	1.39453	1.33479	1.41362	1.29065	1.66359	1.61425	1.58238	1.70013	1.62663	1.66741	1.93474	1.82393	1.72512	1.57696	1.5158	1.44146	1.75505	1.57077	1.42151	1.56353	1.42229	1.6369	1.84004	1.50427
	1.44512	1.28174	1.18392	1.09997	1.02714	0.96336	0.907034	0.766559	0.800847	0.838347	0.87953	0.844498	0.81215	0.782188	0.754359	0.728442	0.704246	0.681606	0.660377	0.64043	0.635274	0.667569	0.703324	0.743125	0.787702	0.837968	0.895086	0.96056	1.03637	1.16121	1.18031	1.3334	1.22919	1.26801	1.48909	1.43449	1.39823	1.42102	1.36708	1.43911	1.68556	1.41228	1.43034	1.35899	1.39792	1.37432	1.52838	1.42308	1.33136
0.622407	0.58628	0.593424	0.607608	0.624166	0.646923	0.609237	0.636002	0.606255	0.584369	0.578498	0.575376	0.572743	0.564133	0.620661	0.629285	0.660421	0.734382	0.662689	0.656002	0.644751	0.605719	0.608126	0.64406	0.652818	0.654717	0.736523	0.641807	0.634304	0.631103	0.627828	0.60747	0.596499	0.608254	0.701445	0.720271	0.727207	0.746592	0.671315	0.750186	0.76366	0.784773	0.655805	0.653512	0.782592	0.796778	0.805297	0.781781	0.795997	0.78581
0.590835	0.584803	0.743686	0.738274	0.59273	0.628298	0.648724	0.635068	0.634922	0.569764	0.613076	0.646378	0.677024	0.599702	0.531345	0.488202	0.496687	0.515742	0.516147	0.506122	0.64833	0.901681	0.749035	0.760219	0.771743	0.783622	0.932676	0.896688	0.70688	0.695974	0.671392	0.695394	0.673452	0.826745	0.643178	0.656175	0.714178	0.755087	0.767082	0.769517	0.764844	0.764431	0.852064	0.858776	0.843682	0.838058	0.835941	0.852656	0.83547	0.797927
0.538427	0.537455	0.549526	0.546999	0.568035	0.545082	0.552215	0.587645	0.617935	0.623605	0.64675	0.64142	0.605225	0.562818	0.583243	0.599268	0.55255	0.575069	0.577114	0.590459	0.607428	0.617435	0.657696	0.711464	0.752326	0.717993	0.774409	0.766319	0.759821	0.715721	0.741638	0.798596	0.791065	0.847717	0.915685	0.99967	0.965246	1.01317	0.948659	1.02367	1.10958	1.06814	0.963594	0.877686	0.805842	0.827794	0.753794	0.813764	0.884102	0.967749
1.43258	1.24927	1.23322	1.26011	1.33634	1.23365	1.06692	0.976944	0.914413	0.859405	1.11444	1.10832	0.92104	0.897172	0.883352	0.891593	0.936087	0.985255	0.96324	0.902735	0.897405	0.892137	0.812086	0.864008	0.742116	0.92724	0.761624	0.823422	0.899179	0.980325	1.03624	1.24356	1.16266	1.10446	1.16466	1.12639	1.09056	1.06328	1.03733	1.01262	1.05171	1.20969	1.12649	1.054	1.16004	1.1354	1.19304	1.25686	1.27335	1.19416
0.764993	0.748702	0.766463	0.770406	0.760364	0.696014	0.709697	0.723928	0.738743	0.52933	0.659828	0.697365	0.845976	0.86646	0.905915	1.00059	0.928464	0.978854	0.932689	0.891261	0.853357	0.710812	0.759503	0.878665	0.848536	0.853326	0.830256	0.784908	0.862657	0.957502	0.959989	1.03303	0.922319	0.984135	0.899213	0.827783	0.909204	1.00839	1.13187	1.2898	1.49896	1.16657	1.13259	0.855613	0.687487	0.698201	0.756121	0.780664	0.806854	0.834862
0.71683	0.71373	0.713792	0.740997	0.764607	0.780692	0.858325	0.872134	0.905335	0.883897	0.849065	0.807542	0.824893	0.81073	0.805585	0.851146	0.857613	0.864179	1.08764	0.950978	1.01455	0.962676	0.915848	0.873365	0.834648	0.888824	0.813855	0.797509	0.827322	0.8146	0.802264	0.790295	0.778678	0.767398	0.75644	0.786713	0.819509	0.85361	0.890673	0.849348	0.783673	0.96471	0.972766	0.865033	0.914062	0.904997	0.89611	0.887396	0.87885	0.870467
	0.725023	0.77314	0.758109	0.811562	0.895613	0.806115	0.874884	0.902008	0.952238	0.971463	1.01246	0.999255	0.963194	1.04711	0.928769	0.84554	0.876482	0.900313	0.917659	0.921206	0.883174	0.872174	0.868889	0.92577	0.925422	0.962473	0.932571	0.949064	0.966152	1.09258	1.132	1.07259	1.11654	1.09435	1.07302	0.996155	1.03251	1.03626	0.991246	0.949979	1.03155	1.20505	1.13069	1.11467	1.10854	1.03318	1.03386	1.08584	1.07191
																																									1.14152	0.954607	0.820292	0.719112	0.640152	0.770467	1.04027	1.50705	1.64513
	4.91266	3.53064	3.37557	3.16538	5.28568	5.08936	3.09837	3.20555	4.01063	3.71854	5.7141	3.43694	5.7672	4.22851	4.86163	3.29641	3.02657	4.38967	3.45321	2.84605	4.19049	2.90004	3.60734	3.68695	3.6823	3.94368	5.07692	4.43954	3.94434	4.27974	5.15843	4.37082	5.52796	4.35111	4.55554	5.49701	4.77585	4.45423	4.67379	4.57726	4.57512	4.50463	4.43628	4.36998	4.77328	4.64949	4.70171	4.63373	4.88357
	0.666919	0.684561	0.708714	0.661751	0.731508	0.702976	0.71268	0.709908	0.706583	0.703289	0.735725	0.687028	0.644377	0.741312	0.713218	0.706368	0.649728	0.635843	0.63568	0.635635	0.632077	0.607572	0.642603	0.822992	0.611845	0.573333	0.63912	0.575153	0.523599	0.530812	0.538227	0.545853	0.589051	0.639675	0.635838	0.632046	0.6283	0.624597	0.6328	0.620584	0.62976	0.626604	0.62348	0.640766	0.659037	0.652863	0.646803	0.672934	0.701264
		0.636044	0.634774	0.557305	0.580665	0.597922	0.56509	0.553763	0.580851	0.509899	0.527655	0.492176	0.519635	0.525575	0.565589	0.587865	0.630966	0.620659	0.645823	0.642184	0.621222	0.618176	0.634102	0.567935	0.562251	0.572812	0.523955	0.512784	0.588504	0.577341	0.612431	0.622894	0.588243	0.557244	0.540946	0.521791	0.503947	0.470078	0.473204	0.474899	0.476605	0.482882	0.487726	0.453146	0.48361	0.487516	0.491485	0.495519	0.532533
			0.52975	0.73709	1.21111	1.19795	1.18506	1.17246	1.18427	0.743941	0.542304	0.548437	0.453329	0.363207	0.302975	0.297029	0.257599	0.227411	0.203557	0.194175	0.185329	0.207582	0.235907	0.289957	0.376137	0.399016	0.377976	0.384034	0.382706	0.3765	0.402608	0.319877	0.265351	0.226707	0.197887	0.219831	0.20099	0.210887	0.22181	0.230532	0.239969	0.247777	0.268868	0.293885	0.256711	0.275993	0.328135	0.40457	0.408734
				0.471062	0.435723	0.460347	0.43183	0.441113	0.444698	0.448343	0.422631	0.445377	0.494959	0.513402	0.470346	0.460045	0.449116	0.438694	0.490197	0.510177	0.495339	0.502926	0.45489	0.431056	0.415301	0.416304	0.404006	0.408608	0.415271	0.423206	0.440101	0.450329	0.445178	0.471416	0.444521	0.470437	0.443447	0.440753	0.430786	0.421259	0.458262	0.448144	0.460071	0.447544	0.432564	0.459312	0.448387	0.425724	0.428139
				0.905617	0.942485	1.01741	1.00711	1.073	0.903971	1.0485	0.898615	0.865704	0.799609	0.89253	0.875228	0.888132	0.955429	0.881461	0.811221	0.956236	0.847058	0.853927	0.860907	0.868003	0.762632	0.775835	0.771992	0.8084	0.847562	0.890712	0.828564	0.790491	0.772188	0.754713	0.760648	0.895599	0.744301	0.737211	0.67714	0.828447	0.673424	0.683222	0.693309	0.688823	0.595565	0.703457	0.790922	0.672003	0.677314
				0.631485	0.639247	0.688447	0.613757	0.612659	0.627359	0.626275	0.622705	0.605977	0.59216	0.576345	0.558122	0.642951	0.622394	0.617322	0.689959	0.699842	0.727085	0.756536	0.777464	0.799583	0.822998	0.819371	0.815776	0.812212	0.80868	0.805178	0.801706	0.798264	0.794851	0.791467	0.769109	0.747979	0.727979	0.709021	0.691025	0.67392	0.657641	0.64213	0.630926	0.620106	0.60965	0.599542	0.693019	0.679824	0.683651
						0.747862	0.786236	0.819519	0.855746	0.895323	0.923753	0.896321	0.860525	0.890747	0.92317	0.958042	0.995651	1.03633	1.08048	1.0194	0.964859	0.915855	0.871588	0.866135	0.860749	0.917968	0.890216	0.91858	0.948811	0.9811	0.982897	1.02717	0.998558	0.991532	0.940118	0.893773	0.851782	0.81356	0.778621	0.74656	0.717034	0.747264	0.780156	0.816076	0.68068	0.680557	0.680434	0.660164	0.641984
							1.1962	1.14525	1.26714	1.2815	1.2641	1.24716	1.23067	1.57419	1.56967	1.72544	1.81804	1.60905	1.62607	1.24101	1.11711	1.04183	0.976051	0.918087	1.50328	1.24214	1.16891	1.26778	1.11197	0.900866	1.12947	1.19113	1.10681	0.999188	1.39809	0.913991	1.20295	1.38162	1.34569	1.31158	1.34086	1.28319	1.23028	1.18156	1.13655	1.09484	1.05609	1.01998	1.06896
							1.24417	1.16099	0.982379	0.873197	0.78328	0.706675	0.738922	0.774253	0.738944	0.71779	0.704483	0.691661	0.637725	0.628536	0.619607	0.610929	0.628419	0.625897	0.67589	0.731291	0.74188	0.752782	0.802021	0.858153	0.821831	0.920819	0.918465	0.912362	0.837137	0.798587	0.790119	0.729648	0.728066	0.685958	0.680648	0.61875	0.625075	0.631531	0.649906	0.675238	0.654345	0.656743	0.562112
									1.05413	1.154	1.57726	1.14911	1.37521	1.71206	2.26748	3.35632	2.4028	1.8712	1.12211	0.865543	0.773479	0.699117	0.6378	0.632788	0.627855	0.926603	1.76773	2.24047	2.3413	2.45162	2.57286	2.70671	2.85526	3.72756	5.06298	6.57001	6.00729	4.85622	6.76752	4.60099	4.49291	5.22788	5.36012	5.03739	5.04206	5.04674	5.05143	5.05612	5.57732
											0.403659	0.409708	0.415941	0.422366	0.428993	0.435831	0.442431	0.449234	0.479951	0.505006	0.487203	0.528195	0.518026	0.513585	0.493498	0.579464	0.500194	0.497766	0.486862	0.616634	0.532917	0.541667	0.539382	0.539019	0.540775	0.543803	0.56623	0.57972	0.570879	0.577643	0.563851	0.545897	0.681422	0.524825	0.540174	0.54273	0.531559	0.540193	0.549113
												0.736908	0.743746	0.735924	0.747295	0.784312	0.784911	0.786161	0.787415	0.788673	0.756232	0.781613	0.793985	0.708899	0.734702	0.717899	0.714124	0.762669	0.746488	0.71272	0.776446	0.713298	0.738521	0.728285	0.685256	0.648686	0.655837	0.633236	0.634715	0.650176	0.650956	0.650476	0.685427	0.705103	0.670292	0.690698	0.678561	0.688363	0.68331
													0.680054	0.674781	0.690054	0.827228	0.787323	0.828097	0.873324	0.894238	0.781902	0.79621	0.876725	0.79402	0.791918	0.795175	0.798458	0.801769	0.805107	0.762127	0.893226	0.834195	0.782483	0.736808	0.696171	0.659782	0.627009	0.667925	0.689672	0.595116	0.606016	0.609956	0.613948	0.548332	0.532453	0.596618	0.678368	0.626595	0.582164
																	0.721181	0.696708	0.64987	0.619166	0.590239	0.562811	0.555059	0.544565	0.533774	0.571656	0.569305	0.561139	0.605385	0.609472	0.684616	0.704009	0.731368	0.7446	0.809567	0.797606	0.821695	0.773738	0.740565	0.716871	0.747903	0.746342	0.814446	0.885586	0.913231	0.940209	0.938959	0.882219	0.85252
																			0.709071	0.827095	0.871603	0.889064	0.901541	0.914374	0.894446	0.875368	0.824032	0.875051	0.932805	0.936359	0.939083	0.90405	0.909299	0.91461	0.855497	0.728174	0.821553	0.798579	0.845089	0.808881	0.831003	0.846565	0.867122	0.937545	0.926907	0.916508	0.906339	0.957466	0.832562
																						0.933667	0.953937	0.958091	1.04072	1.06227	1.08397	1.06057	0.939905	0.845006	0.81023	0.846171	0.90075	0.967631	0.920715	0.995876	0.968185	0.979688	0.991107	0.995613	0.916349	0.946311	0.932207	0.876506	0.853348	0.864916	0.759179	0.76142	0.753656
																									0.702633	0.640395	0.644289	0.659867	0.686668	0.656897	0.722783	0.778069	0.784815	0.79168	0.791892	0.78423	0.776714	0.774019	0.80809	0.795948	0.822079	0.849984	0.849844	0.84874	0.79117	0.773672	0.712867	0.666658	0.631361
																												0.94113	0.893263	0.919009	0.986245	0.760878	1.01954	1.0249	1.07084	1.12715	1.16773	1.19858	1.23111	1.26545	1.14711	1.04901	0.966373	0.895801	0.834836	0.846058	0.857586	0.869432	0.881611
																																					0.720637	0.739395	0.722339	0.786599	0.776706	0.864732	0.870638	0.86877	0.869702	0.870636	0.871572	0.87251	0.87345
																																									0.956438	0.927641	0.950195	0.978748	0.954618	0.964904	0.975415	0.986157	0.984105
																																											0.856653	0.838526	0.885336	0.854575	0.888959	0.899778	0.834286
																																															2.5216	2.52292	2.6575
0.386779	0.397413	0.42386	0.454369	0.466279	0.487903	0.498882	0.504678	0.509676	0.536513	0.518891	0.511539	0.498325	0.48901	0.48425	0.511895	0.512517	0.54455	0.524508	0.546973	0.555314	0.546109	0.511563	0.491072	0.466847	0.469854	0.4594	0.460803	0.472063	0.504154	0.508786	0.514595	0.503089	0.489677	0.478239	0.479069	0.483275	0.474988	0.485798	0.498501	0.521198	0.536792	0.533589	0.545671	0.533501	0.516452	0.543861	0.542033	0.572686	0.562094
2.14593	2.57858	2.55691	2.20721	2.54072	2.58188	2.43675	2.84143	2.84312	3.41851	2.84853	3.16893	3.06735	3.53294	3.0664	3.47428	3.35676	3.28667	3.0656	3.67242	2.8158	3.22891	2.57078	2.42305	2.62201	2.65855	2.60847	2.56856	2.50671	2.11398	2.28194	2.23786	1.96922	1.97725	2.02911	1.97763	1.91892	2.04791	1.85096	1.79841	1.54519	1.65496	1.66462	1.49545	1.74581	1.63442	1.6056	1.63747	1.78657	1.96232
					0.176995	0.17358	0.172916	0.18092	0.202178	0.234442	0.278959	0.287293	0.267402	0.23279	0.222463	0.237553	0.222798	0.238821	0.245936	0.295913	0.371381	0.355699	0.370962	0.387594	0.405787	0.433294	0.464294	0.521249	0.54397	0.520243	0.541766	0.581022	0.579099	0.60801	0.588775	0.632254	0.609218	0.67676	0.700431	0.711254	0.665522	0.619423	0.593552	0.641744	0.688905	0.6626	0.707835	0.808658	0.74098
0.892123	0.842098	0.808227	0.817948	0.80653	0.807512	0.788637	0.759347	0.803068	0.787287	0.753687	0.72125	0.719166	0.709221	0.758766	0.834133	0.930366	1.0351	0.935799	0.908175	0.887577	0.870476	0.854814	0.81298	0.786091	0.737845	0.669582	0.623989	0.596348	0.619142	0.636099	0.665292	0.649466	0.639156	0.650173	0.611292	0.591684	0.576133	0.540573	0.530871	0.530347	0.543127	0.560232	0.57845	0.595937	0.61775	0.585126	0.555974	0.54772	0.533493
0.523968	0.572641	0.563494	0.554547	0.581131	0.574576	0.543876	0.562897	0.507782	0.495943	0.491839	0.476494	0.465453	0.480664	0.475259	0.47269	0.444668	0.449496	0.4551	0.478031	0.45541	0.449988	0.454899	0.443049	0.470136	0.462927	0.478608	0.514448	0.511666	0.51973	0.535395	0.515563	0.525807	0.491685	0.497786	0.48834	0.456414	0.465018	0.457752	0.441693	0.438264	0.433072	0.465722	0.453986	0.466718	0.470415	0.48696	0.493636	0.525725	0.539979
0.241306	0.258409	0.262316	0.242255	0.274748	0.288733	0.306891	0.323146	0.359607	0.356973	0.401094	0.387103	0.390536	0.363665	0.370846	0.375073	0.378966	0.384874	0.401824	0.404903	0.382844	0.421967	0.425413	0.424175	0.450677	0.439064	0.473944	0.420147	0.409696	0.404038	0.392285	0.421255	0.420481	0.411361	0.422968	0.462829	0.454238	0.455867	0.47859	0.508065	0.497489	0.510115	0.532672	0.529078	0.529985	0.511785	0.532535	0.505584	0.520033	0.54426
0.53381	0.57309	0.546085	0.5741	0.580066	0.599643	0.636327	0.634276	0.636392	0.635702	0.63016	0.642396	0.641219	0.664438	0.697357	0.704102	0.711162	0.728536	0.733417	0.742795	0.745995	0.730593	0.733497	0.707876	0.708098	0.661796	0.624101	0.592196	0.573632	0.556489	0.551118	0.554991	0.55862	0.575995	0.594486	0.602934	0.620676	0.637242	0.654717	0.677108	0.708965	0.732567	0.755999	0.759321	0.776218	0.789796	0.794395	0.821897	0.841583	0.889673
0.421643	0.428398	0.415669	0.438634	0.488405	0.505647	0.498918	0.523318	0.543936	0.534786	0.528337	0.559445	0.666178	0.646384	0.634872	0.812778	0.623992	0.697678	0.650208	0.608786	0.58302	0.575638	0.567327	0.605221	0.621307	0.72513	0.768427	0.796468	0.894221	0.96297	0.887131	0.976533	0.98328	0.89986	0.883769	1.00938	0.823852	1.01372	1.02474	1.09169	0.89492	1.14374	0.939851	0.913967	0.936136	0.889718	0.822015	0.841093	0.995341	0.876426
																													0.744977	0.785658	0.777759	0.737947	0.777379	0.770918	0.699335	0.660412	0.688779	0.796591	0.812108	0.783425	0.730512	0.715329	0.734232	0.816367	0.792838	0.75836	0.638401	0.647705	0.712642
0.794001	0.836162	0.853541	0.868711	0.899177	0.947644	0.955362	0.939193	0.945566	0.934705	0.900021	0.856584	0.848836	0.796104	0.813356	0.853282	0.860803	0.883856	0.878152	0.897317	0.883832	0.831725	0.791556	0.759365	0.761542	0.752674	0.746362	0.714089	0.72827	0.728297	0.738734	0.739624	0.748921	0.764454	0.787138	0.77269	0.756032	0.773441	0.756529	0.760696	0.77246	0.758049	0.787096	0.807485	0.829668	0.845516	0.866753	0.904389	0.907771	0.933617
0.536475	0.580309	0.547866	0.621442	0.533953	0.551068	0.681286	0.555035	0.56469	0.525456	0.564048	0.772348	1.22458	1.14611	0.764467	0.573498	0.523197	0.534353	0.590339	0.590336	0.645474	0.619813	0.690725	0.779958	0.911569	1.41811	3.08801	1.38943	1.42078	1.38343	1.46832	1.39742	1.16325	1.37849	1.32607	1.08688	1.05688	1.02849	1.11854	1.16857	1.25805	1.20517	2.22849	1.37609	1.13975	3.11859	1.64325	1.11552	1.13402	1.36178
0.730629	0.731387	0.734513	0.737253	0.725225	0.748242	0.751329	0.740329	0.764195	0.746848	0.735099	0.728941	0.740503	0.776658	0.808356	0.856003	0.894778	0.933736	0.963598	0.978497	0.976819	0.972363	0.972774	0.946564	0.891184	0.876468	0.801436	0.767371	0.757798	0.736919	0.745591	0.729256	0.735421	0.750355	0.761176	0.789034	0.775313	0.768719	0.765718	0.758416	0.756548	0.72754	0.705381	0.674613	0.667234	0.655864	0.655661	0.64632	0.623465	0.608708
0.695103	0.668698	0.616815	0.544653	0.541089	0.493651	0.454978	0.421925	0.395694	0.418358	0.447568	0.550672	0.596185	0.649899	0.739285	0.683012	0.598899	0.590951	0.648211	0.785074	0.822833	0.796639	0.76988	0.789099	0.658929	0.5591	0.536085	0.509277	0.539098	0.572917	0.553381	0.473638	0.496594	0.514965	0.54697	0.583217	0.555512	0.686078	0.665964	0.511413	0.602751	0.542456	0.575243	0.592798	0.570871	0.554758	0.590131	0.595209	0.632436	0.585849
0.431465	0.427349	0.470817	0.532567	0.576362	0.584791	0.584074	0.6529	0.529609	0.454495	0.442536	0.449237	0.473831	0.425124	0.393111	0.373064	0.40723	0.390154	0.401681	0.434986	0.424803	0.429429	0.448302	0.437522	0.444644	0.424239	0.412899	0.436847	0.463216	0.47498	0.482335	0.454671	0.430009	0.438279	0.466323	0.465979	0.477321	0.461893	0.478009	0.503019	0.532647	0.570689	0.613361	0.618778	0.585704	0.583613	0.616851	0.567352	0.584346	0.544452
0.79523	0.759244	0.737658	0.759289	0.766477	0.760438	0.734691	0.795952	0.768119	0.93219	0.990264	0.904242	1.05281	1.04322	1.14495	1.1214	0.919236	1.02145	0.819311	0.812234	0.807423	0.671316	0.709897	0.621502	0.552851	0.657803	0.599311	0.578174	0.605604	0.567762	0.623126	0.605579	0.631157	0.570908	0.604675	0.5939	0.580832	0.606233	0.654314	0.618211	0.660344	0.679454	0.638475	0.645776	0.667165	0.672087	0.709847	0.717642	0.72561	0.692721
0.688684	0.608532	0.617997	0.618099	0.637716	0.64454	0.669411	0.649084	0.70152	0.7005	0.725031	0.725907	0.797882	0.761806	0.775194	0.789473	0.787592	0.78586	0.707975	0.714397	0.708514	0.712291	0.71392	0.697095	0.682618	0.691633	0.692208	0.701256	0.694505	0.709262	0.699935	0.703203	0.704421	0.693077	0.697685	0.691295	0.700067	0.671049	0.72579	0.702376	0.704539	0.695792	0.678958	0.664668	0.658772	0.650214	0.65378	0.648873	0.611365	0.640928
0.607801	0.602822	0.57504	0.53255	0.550766	0.531423	0.56798	0.592201	0.595354	0.610762	0.618973	0.648514	0.690318	0.683789	0.697424	0.718554	0.743965	0.726842	0.740993	0.710858	0.697025	0.672856	0.651734	0.648999	0.657489	0.678184	0.70924	0.692933	0.736221	0.733593	0.701951	0.697953	0.687316	0.67159	0.671942	0.694798	0.718671	0.723738	0.738828	0.776568	0.769998	0.804799	0.792162	0.794853	0.774496	0.763843	0.783202	0.809177	0.797104	0.75351
0.396168	0.441355	0.386519	0.36097	0.384495	0.357394	0.363484	0.344515	0.381782	0.398277	0.446867	0.493128	0.526514	0.548487	0.655185	0.67676	0.662437	0.58614	0.55605	0.556947	0.584299	0.552797	0.626271	0.625664	0.636848	0.700239	0.685418	0.614049	0.609421	0.684041	0.691329	0.698773	0.69738	0.713542	0.614097	0.558851	0.552758	0.50724	0.522442	0.605584	0.585012	0.546359	0.576148	0.579141	0.586382	0.677105	0.80102	0.770315	0.782338	0.786347
1.13631	1.13268	1.19557	1.06727	1.04574	0.996729	0.866746	0.937739	0.952144	1.02997	1.05876	1.00465	1.09428	0.991225	0.878229	0.867707	0.882267	0.830141	0.810014	0.844576	0.794731	0.888611	0.791447	0.695509	0.620316	0.559795	0.562884	0.566007	0.569165	0.59778	0.506404	0.588273	0.675319	0.733181	0.788191	0.945249	0.927919	0.843588	0.962571	0.877893	0.955304	0.990544	0.989766	0.988989	1.14876	1.18585	1.16307	1.14115	1.15485	0.938745
0.754421	0.769125	0.792746	0.801032	0.83811	0.83616	0.847715	0.864431	0.867047	0.852554	0.853193	0.837015	0.82241	0.810461	0.83104	0.855157	0.905591	0.949175	0.970354	1.00792	1.04183	1.05713	1.04037	1.02106	1.02522	0.959019	0.924324	0.871228	0.840227	0.847574	0.835909	0.856464	0.862013	0.859799	0.864936	0.848702	0.876572	0.901247	0.887604	0.861202	0.8785	0.8463	0.837392	0.796535	0.756376	0.762923	0.751333	0.720161	0.693365	0.696827
0.773258	0.78148	0.782456	0.767861	0.795687	0.804	0.822763	0.833798	0.838206	0.793413	0.760524	0.767953	0.756049	0.714105	0.669662	0.768715	0.820971	0.85547	0.849389	0.8971	0.864525	0.849246	0.826721	0.835705	0.824718	0.796227	0.742843	0.786809	0.801007	0.839563	0.843353	0.836663	0.893405	0.902846	0.893239	0.911941	0.900443	0.941852	1.00905	1.03552	1.01083	1.01131	0.966848	0.962696	0.970562	1.00647	1.07776	1.05136	1.1268	1.17779
9.74968	9.25481	8.78816	4.6987	3.62545	3.80954	4.01331	4.19124	4.38566	4.59901	4.83417	5.09468	5.38486	5.7101	6.07715	6.49463	6.16849	5.87355	5.2676	4.87681	5.72423	5.8481	7.07209	5.70032	6.87086	6.04335	5.46303	5.15934	5.60102	4.48429	4.33908	5.26997	3.97274	4.21574	4.31261	5.05554	6.10772	5.36636	5.71908	5.49897	5.48235	5.21581	5.75108	6.31189	5.64442	5.98449	5.63626	5.54619	5.44138	6.79886
0.411668	0.529377	0.42555	0.420686	0.471512	0.444224	0.405555	0.365108	0.371514	0.376162	0.451381	0.444382	0.431449	0.442462	0.47875	0.498085	0.503915	0.475941	0.498167	0.484078	0.504505	0.528965	0.537518	0.574611	0.5907	0.593782	0.560731	0.548307	0.530743	0.520947	0.544232	0.530753	0.532391	0.500742	0.497142	0.509045	0.528411	0.494756	0.483488	0.476987	0.469886	0.474952	0.495036	0.495431	0.466321	0.479923	0.478665	0.467899	0.470081	0.44123
0.688417	0.69259	0.637663	0.627717	0.64093	0.649719	0.638246	0.678752	0.675029	0.673791	0.650462	0.644655	0.642921	0.658918	0.628216	0.671483	0.686001	0.667982	0.637048	0.651691	0.603995	0.602152	0.610762	0.625983	0.61317	0.605357	0.620133	0.635195	0.633054	0.632414	0.633017	0.641303	0.656714	0.675548	0.684244	0.697908	0.687164	0.703773	0.730385	0.698442	0.721259	0.701923	0.699806	0.762802	0.759136	0.791249	0.791177	0.813537	0.817091	0.802173
0.728077	0.879232	0.905975	1.02518	0.958241	0.908932	0.88919	0.858775	0.836762	0.828326	0.809328	0.778146	0.818131	0.828145	0.882179	0.892146	0.876012	0.87764	0.817213	0.800663	0.795709	0.769366	0.746026	0.745605	0.748673	0.786866	0.772948	0.811359	0.830121	0.849148	0.884317	0.956277	0.936378	0.947154	0.89911	0.875227	0.885804	0.889458	0.886778	0.888476	0.845553	0.855759	0.866215	0.964054	0.958983	0.954222	1.03128	1.01449	1.05067	1.01899
0.212579	0.233081	0.261099	0.258823	0.257947	0.255557	0.244622	0.26026	0.280044	0.294339	0.300578	0.311738	0.298964	0.296253	0.257444	0.247444	0.262245	0.243398	0.264939	0.276375	0.243542	0.241757	0.239998	0.24145	0.233236	0.225563	0.216604	0.213209	0.198265	0.191858	0.188897	0.186655	0.184465	0.182327	0.180237	0.185309	0.190676	0.196362	0.202398	0.208817	0.215656	0.222959	0.230773	0.239156	0.239577	0.261568	0.266008	0.274948	0.278847	0.276317
0.498138	0.508559	0.453651	0.409444	0.417614	0.377542	0.440338	0.472876	0.614929	0.566895	0.525822	0.490298	0.491723	0.391052	0.33615	0.351578	0.345874	0.351212	0.349373	0.398751	0.349924	0.311749	0.308507	0.311185	0.31391	0.316683	0.340951	0.320085	0.301625	0.341537	0.393624	0.419063	0.448019	0.459225	0.463731	0.463396	0.491011	0.491556	0.511185	0.482438	0.50711	0.407785	0.474245	0.566584	0.553465	0.637345	0.623798	0.684454	0.758177	0.738105
0.658857	0.643706	0.616815	0.587788	0.633322	0.686502	0.868143	1.18048	1.12574	1.07585	1.03019	0.901089	0.640725	0.669049	0.631756	0.616336	0.746123	0.726824	0.708498	0.691074	0.709301	0.728515	0.741427	0.754805	0.768674	0.783063	0.799021	0.610036	0.661852	0.670764	0.656827	0.710803	0.695886	0.675051	0.655427	0.708991	0.697341	0.587657	0.671084	0.674096	0.733927	0.687607	0.618817	0.613917	0.575149	0.620578	0.546536	0.526527	0.577086	0.511075
0.688119	0.786247	0.663422	0.730094	0.705686	0.824905	0.844179	0.874341	0.893616	0.874158	0.849475	0.971266	1.12863	1.29028	1.64104	1.94708	1.85113	2.01384	1.89277	1.85632	1.70644	1.52288	1.55121	1.58062	1.61117	1.62122	1.33775	1.35945	1.30195	1.24912	1.36969	1.0523	0.98389	0.915541	0.932022	0.910423	0.889801	0.90266	0.915895	0.929524	0.848539	0.780534	0.722621	0.672708	0.637278	0.665479	0.681017	0.759403	0.858181	0.936762
																											0.770562	0.787916	0.806071	0.825081	0.80599	0.792861	0.780152	0.868823	0.807495	0.817869	0.770323	0.787616	0.753128	0.875031	0.868328	0.94401	1.00993	0.929163	0.9025	0.939874	0.980477	0.916316	1.04329
0.916774	1.01504	1.0724	1.02257	1.00184	1.184	0.911481	0.843993	0.96323	1.2585	0.996933	1.10609	1.24208	1.17299	1.28029	1.06202	1.03576	1.03344	0.874013	0.81676	0.552163	0.715928	0.683788	0.65441	0.627452	0.602628	0.579693	0.663542	0.696841	0.733658	0.814512	1.3403	1.26782	0.93516	0.991921	0.905551	0.833017	0.865884	1.15159	0.816031	0.815929	0.741474	0.851981	0.815781	0.782531	0.751886	0.718929	0.738631	0.694835	0.655941
0.618398	0.595855	0.586484	0.556995	0.538008	0.556585	0.56494	0.584238	0.582982	0.617437	0.625381	0.639216	0.660221	0.658909	0.698677	0.663606	0.668495	0.676415	0.688219	0.662033	0.65519	0.628512	0.574558	0.572409	0.561808	0.576634	0.56376	0.576188	0.594465	0.586333	0.595938	0.619841	0.631184	0.654071	0.638892	0.68284	0.678478	0.688971	0.703525	0.699357	0.719821	0.709228	0.710459	0.719638	0.709758	0.723537	0.73409	0.735923	0.715961	0.706999
3.07257	3.21442	3.75048	3.18237	3.68382	4.94606	5.59411	5.8603	5.73875	5.51939	6.83632	6.38971	6.16216	5.0556	4.74839	5.12515	5.56687	4.43362	3.33756	3.3299	3.36248	3.39571	2.90361	3.06524	2.90316	2.79664	2.59871	2.59321	2.61777	2.93184	3.06296	3.20712	3.02931	3.12536	2.79396	2.90503	2.8358	2.71916	2.98892	2.6114	2.17413	2.38378	2.21513	2.05497	1.91448	2.05625	1.76057	1.67577	1.70518	1.5514
			0.550075	0.587067	0.596013	0.661987	0.646988	0.658058	0.669513	0.681373	0.625482	0.637875	0.650769	0.698517	0.701731	0.63131	0.653271	0.560258	0.535255	0.512389	0.467098	0.46382	0.460587	0.414823	0.462274	0.481703	0.484183	0.486688	0.48922	0.464799	0.553428	0.465987	0.553166	0.492182	0.443309	0.509488	0.512886	0.462492	0.421115	0.5184	0.516271	0.397177	0.421391	0.448748	0.479905	0.472459	0.404544	0.3537	0.377727
0.232121	0.244516	0.24832	0.235614	0.224144	0.230739	0.233693	0.236724	0.244043	0.250546	0.240086	0.24626	0.252761	0.259615	0.26685	0.287093	0.269585	0.278108	0.27737	0.291372	0.290677	0.307768	0.263377	0.287032	0.315355	0.329656	0.342648	0.356705	0.357222	0.35387	0.363471	0.361926	0.360386	0.37382	0.36786	0.362086	0.350561	0.353711	0.352888	0.349546	0.352562	0.333392	0.333709	0.334026	0.326126	0.331079	0.336184	0.344375	0.338466	0.346677
																										0.754953	0.590471	0.625359	0.547571	0.486993	0.471867	0.465945	0.452672	0.475392	0.482828	0.4905	0.49842	0.480541	0.488546	0.50451	0.521553	0.516564	0.500218	0.516794	0.510871	0.501749	0.477595	0.45566	0.53031
0.426355	0.434719	0.455757	0.434064	0.445451	0.44258	0.430188	0.430866	0.431491	0.42458	0.414289	0.432981	0.460359	0.439399	0.420264	0.411798	0.403665	0.395848	0.388327	0.392666	0.397103	0.401641	0.406284	0.411036	0.316641	0.257505	0.257546	0.27489	0.275592	0.270905	0.26556	0.273168	0.29795	0.284581	0.293208	0.303607	0.275791	0.298546	0.303477	0.322942	0.34176	0.3371	0.332442	0.323557	0.329455	0.326704	0.319785	0.313152	0.318554	0.270342
0.432163	0.447787	0.502269	0.567868	0.66266	0.63524	0.707622	0.686633	0.626368	0.595656	0.540124	0.525536	0.552865	0.555769	0.55879	0.583219	0.615535	0.612139	0.614405	0.560695	0.547299	0.491523	0.505331	0.485074	0.456506	0.441358	0.514728	0.547186	0.59539	0.5659	0.567386	0.523177	0.503356	0.466198	0.445371	0.422208	0.435146	0.526137	0.495866	0.482613	0.45613	0.447438	0.433033	0.469188	0.466575	0.452682	0.464985	0.452946	0.451639	0.494703
0.443569	0.438891	0.47635	0.404279	0.35115	0.443543	0.451243	0.463129	0.486308	0.475104	0.536248	0.568722	0.583518	0.568103	0.596618	0.581007	0.534057	0.5483	0.523733	0.569008	0.576474	0.503285	0.523099	0.532693	0.559799	0.525526	0.541343	0.568359	0.588978	0.61115	0.635057	0.759213	0.777537	0.796767	0.737247	0.739396	0.717719	0.702099	0.722263	0.796544	0.804741	0.813108	0.771691	0.73917	0.795402	0.875791	0.960436	0.907511	0.897841	1.11531
0.953094	0.982341	0.969089	0.987909	1.00672	1.02403	0.954352	0.903438	0.894485	0.851356	0.825152	0.822991	0.803012	0.81706	0.852257	0.867875	0.90036	0.879193	0.867664	0.868871	0.848651	0.848641	0.857407	0.837291	0.823921	0.833959	0.861619	0.850009	0.789182	0.757056	0.764481	0.764056	0.760416	0.768626	0.731787	0.763298	0.721317	0.749558	0.759277	0.7827	0.818614	0.849426	0.879231	0.907174	0.956325	0.938423	0.949974	0.974942	0.93664	1.03789
1.05935	1.01026	0.967708	0.92108	0.901308	0.85154	0.849863	0.848193	0.767374	0.819788	0.790134	0.7529	0.793983	0.828401	0.757748	0.776774	0.866699	0.836486	0.808308	0.842367	0.807192	0.864923	0.756572	0.813822	0.818058	0.800911	0.855902	0.844064	0.901088	0.831085	0.923326	0.863098	0.835477	0.842741	0.784159	0.82802	0.73264	0.779545	0.714297	0.795404	0.908767	0.719406	0.713537	0.715507	0.670914	0.850926	0.745006	0.632922	0.605443	0.600747
0.682133	0.666037	0.642664	0.696189	0.664797	0.637501	0.640324	0.664501	0.616845	0.838229	0.691668	0.848258	0.818052	0.838112	0.816683	0.79184	0.768463	0.768689	0.768915	0.729602	0.765236	0.788382	0.764568	0.74215	0.793625	0.814185	0.835838	0.813509	0.783263	0.767453	0.746884	0.761038	0.747482	0.771151	0.726352	0.701992	0.728206	0.73052	0.75209	0.763665	0.894821	0.781461	0.76085	0.79509	0.837996	0.835847	0.829254	0.822765	0.816376	0.822429
		1.22527	1.073	0.954398	1.12083	0.730808	0.542153	0.677623	0.903349	1.35458	2.70647	2.04478	1.64307	1.37328	1.17959	1.03379	1.34153	1.59946	1.77293	1.92721	1.62245	1.91744	1.78479	1.46602	2.13677	1.68714	1.54523	1.59289	1.6917	1.63633	2.04291	2.50477	2.72872	2.0488	2.66307	2.77646	2.32931	2.49467	1.71698	2.23461	1.70089	1.85689	1.69975	1.97375	2.22052	1.76122	2.12616	1.79684	2.33316
0.7	0.742198	0.736261	0.68815	0.645941	0.60861	0.683148	0.685881	0.603875	0.592552	0.581645	0.563537	0.645944	0.644885	0.675502	0.647581	0.602345	0.583175	0.583022	0.624437	0.620877	0.640156	0.653613	0.681633	0.667684	0.635698	0.642174	0.661468	0.64199	0.621169	0.612854	0.594792	0.559754	0.530324	0.487278	0.479978	0.455176	0.490305	0.536276	0.573151	0.578122	0.592265	0.611572	0.617148	0.585232	0.584477	0.621188	0.651938	0.677333	0.666909
0.430542	0.445701	0.513265	0.512551	0.514516	0.523737	0.515565	0.524029	0.504104	0.578257	0.491001	0.486645	0.476869	0.495726	0.517286	0.654958	0.571482	0.542516	0.517704	0.486245	0.470952	0.464709	0.477719	0.467742	0.49183	0.511319	0.489773	0.441634	0.431588	0.451541	0.461039	0.462115	0.476152	0.536867	0.479635	0.477088	0.469175	0.486759	0.497663	0.49489	0.582613	0.596072	0.610284	0.669644	0.654162	0.651518	0.653781	0.780215	0.643975	0.639964
1.16269	2.13061	2.15348	1.75332	0.882336	1.61504	1.09703	1.65585	3.37516	3.39653	5.53393	5.99485	5.12291	6.16188	4.54877	3.60502	6.02161	1.87469	1.11016	1.43372	2.02349	3.43752	1.54949	2.42113	1.52099	1.35549	0.794369	0.632995	0.676905	0.629155	0.716924	1.09256	1.69348	2.26135	2.59079	2.83789	3.02173	3.60478	3.73033	3.47491	4.42306	4.84524	4.62255	4.61133	3.93312	5.08195	5.44757	5.72699	3.73197	3.11537
0.764776	0.70831	0.686642	0.716531	0.74732	0.732515	0.763361	0.766253	0.751537	0.753769	0.768425	0.715577	0.713882	0.644557	0.647852	0.638291	0.64988	0.634256	0.657471	0.672781	0.636779	0.648791	0.622189	0.632073	0.610885	0.635948	0.598723	0.618722	0.636012	0.605365	0.586769	0.618343	0.602919	0.585688	0.602701	0.568739	0.567784	0.683593	0.669852	0.598584	0.57125	0.512204	0.448028	0.496635	0.609552	0.590743	0.547394	0.590601	0.50344	0.660446
0.72447	0.744087	0.745737	0.670673	0.674892	0.64944	0.6472	0.663601	0.62465	0.69608	0.667008	0.665019	0.645594	0.66899	0.704667	0.774486	0.69036	0.673668	0.637601	0.656679	0.652279	0.659438	0.616905	0.58866	0.627204	0.58769	0.605444	0.612247	0.590583	0.63531	0.663431	0.661388	0.660627	0.643675	0.640984	0.618833	0.605805	0.624913	0.654741	0.639349	0.55835	0.557667	0.562086	0.566307	0.583156	0.520347	0.536575	0.684466	0.799515	0.804029
																					0.926454	1.02211	1.13978	1.05783	0.986869	1.01755	1.05019	1.085	1.1222	1.16204	1.20481	1.25085	1.30055	0.96754	0.90336	0.955434	1.01388	1.07994	0.870432	1.01	0.676125	0.708192	1.02719	0.655723	0.676307	0.752596	0.745241	0.721692	0.804945
0.62991	0.654091	0.728475	0.69013	0.703628	0.697733	0.721807	0.751441	0.743717	0.747566	0.717287	0.71321	0.710858	0.699089	0.702673	0.730619	0.702261	0.699781	0.693942	0.721183	0.739949	0.750432	0.689333	0.692574	0.680751	0.664441	0.654778	0.662234	0.664953	0.683017	0.728921	0.720692	0.735534	0.716263	0.720461	0.72705	0.73376	0.740596	0.723432	0.751912	0.7271	0.715336	0.679552	0.676948	0.674364	0.687292	0.750707	0.741256	0.754158	0.703159
0.546513	0.527601	0.550125	0.564458	0.664173	0.742492	0.704433	0.695257	0.673549	0.582395	0.531155	0.498875	0.530578	0.60623	0.572929	0.503764	0.511477	0.54125	0.650239	0.728747	0.828817	0.879935	0.879506	0.86281	0.897528	0.93003	0.881176	0.831434	0.787008	0.747088	0.735952	0.725142	0.712843	0.727841	0.754328	0.782816	0.763026	0.773374	0.784008	0.794938	0.803179	0.791333	0.792291	0.788973	0.837953	0.786	0.796256	0.775454	0.779562	0.766091
0.736509	0.727946	0.728773	0.701929	0.733751	0.768596	0.806915	0.794439	0.771219	0.686201	0.746544	0.701941	0.662367	0.724463	0.737427	0.805765	0.794598	0.760029	0.728342	0.671075	0.588315	0.623636	0.51407	0.644795	0.541539	0.578809	0.537655	0.501964	0.528286	0.532625	0.543013	0.553814	0.602019	0.655239	0.663511	0.655788	0.68475	0.691878	0.711275	0.658538	0.613082	0.661461	0.685298	0.693451	0.670525	0.68901	0.643862	0.558267	0.588288	0.586344
																																															8.82491	6.82033	6.69993
	0.364745	0.377963	0.382162	0.403961	0.383396	0.384577	0.403703	0.40874	0.413905	0.424531	0.429141	0.433853	0.432019	0.430202	0.450714	0.47328	0.498225	0.482327	0.490049	0.498022	0.488796	0.506962	0.488026	0.483646	0.496831	0.510755	0.51465	0.518604	0.454583	0.467707	0.444365	0.509911	0.455517	0.437546	0.452588	0.415841	0.424435	0.433392	0.442734	0.452489	0.462683	0.473347	0.490862	0.451026	0.417171	0.388043	0.375982	0.364649	0.422669
		0.434254	0.456143	0.477623	0.458998	0.455014	0.465236	0.475927	0.502184	0.51977	0.535748	0.56796	0.571526	0.634251	0.616087	0.588208	0.621426	0.580297	0.57887	0.568945	0.561794	0.582033	0.5539	0.569735	0.602999	0.569271	0.538093	0.532344	0.525975	0.492015	0.49252	0.493266	0.481621	0.463866	0.457155	0.437145	0.424818	0.431205	0.402977	0.426529	0.424287	0.428917	0.393089	0.402172	0.391095	0.395394	0.407828	0.409833	0.450665
																																			15.1969	9.20468	6.21575	4.72687	3.79783	3.4158	2.03787	2.05781	1.45544	1.12587	1.29952	1.25336	1.21278	1.11537	1.30098
			1.65119	1.52406	1.6197	1.62536	1.56039	1.54505	1.68511	1.68942	1.69375	1.84286	1.68143	1.71517	1.75028	1.64619	1.5891	1.57321	1.55764	1.53052	1.50432	1.4808	1.50792	1.34887	1.32267	1.35197	1.39217	1.39419	1.36211	1.29042	1.33752	1.34739	1.42516	1.35922	1.35848	1.33472	1.46764	1.41183	1.45847	1.53691	1.57372	1.65244	1.59236	1.64799	1.65784	1.6072	1.63905	1.65208	1.69783
			0.664566	0.709297	0.64358	0.673402	0.76262	0.781432	0.780427	0.79382	0.778791	0.764319	0.7939	0.825863	0.839322	0.853227	0.8676	0.802761	0.822067	0.864578	0.834474	0.806395	0.790431	0.775086	0.815843	0.774596	0.827647	0.801395	0.834279	0.808034	0.785296	0.76715	0.749823	0.709581	0.673439	0.774721	0.680033	0.737327	0.675699	0.683765	0.722129	0.76584	0.793387	0.822052	0.829981	0.836783	0.834591	0.748955	0.73546
				0.568228	0.580213	0.599805	0.584222	0.626319	0.602197	0.617761	0.606422	0.562229	0.568517	0.548951	0.508708	0.499786	0.472299	0.437621	0.451527	0.496389	0.482153	0.516559	0.556253	0.602555	0.600548	0.569846	0.549992	0.51645	0.498998	0.49368	0.473271	0.470986	0.476711	0.472992	0.472108	0.474443	0.503129	0.496708	0.514552	0.469178	0.47722	0.446228	0.431915	0.417721	0.443282	0.374463	0.378342	0.359398	0.39472
				0.719148	0.741624	0.732213	0.700651	0.711934	0.69724	0.570908	0.466858	0.477216	0.488043	0.499373	0.547395	0.603859	0.659719	0.726967	0.740629	0.754814	0.769554	0.769732	0.781046	0.763744	0.747192	0.76522	0.713937	0.716838	0.719762	0.762371	0.800482	0.842603	0.844407	0.846218	0.827891	0.759212	0.714716	0.696853	0.705628	0.679997	0.676872	0.655247	0.678041	0.704525	0.775249	0.826681	0.885423	0.916049	0.880797
						1.20414	1.26844	1.51095	1.53779	1.5656	1.58202	1.64319	1.70541	1.45724	1.69763	1.63408	1.25288	0.903182	0.921273	1.60813	1.42985	1.28716	1.17036	1.48235	1.53089	1.54043	1.55008	1.50418	1.58079	1.5115	1.40062	1.45637	1.51674	1.51281	1.50889	1.41278	1.51981	1.4783	1.61206	1.62497	1.65587	1.54213	1.52364	1.58968	1.66169	1.74055	1.68152	1.59039	1.63582
							0.651189	0.662888	0.653648	0.60768	0.635715	0.666462	0.656088	0.648636	0.685939	0.697374	0.709196	0.721427	0.734086	0.747197	0.784145	0.786772	0.8161	0.783761	0.758557	0.734924	0.673975	0.738409	0.699174	0.693438	0.687795	0.74702	0.763891	0.713669	0.718348	0.731521	0.745186	0.746836	0.730674	0.754367	0.748999	0.778583	0.810601	0.845365	0.883245	0.924679	0.970191	1.01604	1.06644
										0.461839	0.552789	0.564	0.589748	0.537202	0.539863	0.542551	0.583199	0.595268	0.604676	0.578267	0.554068	0.59813	0.649806	0.711254	0.690358	0.663804	0.668335	0.672174	0.597173	0.591134	0.569356	0.549125	0.530282	0.449415	0.440822	0.451239	0.479015	0.450757	0.577261	0.567758	0.558564	0.562751	0.567002	0.699203	0.660685	0.480993	0.464093	0.494111	0.52828
																									1.49105	1.21991	1.03221	1.35288	1.20873	1.01182	1.00559	1.09021	1.19038	1.24219	1.32174	1.36618	1.3948	1.40959	1.29097	1.33488	1.34533	1.25994	1.23322	1.2977	1.30346	1.35571	1.41233	1.38624	1.28089
												0.878097	0.652702	0.694799	0.704221	0.659986	0.691024	0.682715	0.664276	0.634847	0.666762	0.683354	0.790012	0.785302	0.767487	0.809132	0.762735	0.669311	0.736978	0.774101	0.838895	0.859033	0.822854	0.901816	0.842246	0.872072	1.07448	1.06881	0.96672	0.979072	1.10533	0.977727	0.982652	1.08733	1.01144	1.05645	0.934657	1.00575	1.08855
												0.813559	0.780784	0.711175	0.675632	0.672772	0.646434	0.622081	0.772721	0.813951	0.748648	0.693044	0.64513	0.6787	0.756322	0.76362	0.724747	0.704584	0.683783	0.72791	0.732959	0.754403	0.750464	0.746678	0.677862	0.667438	0.678143	0.6755	0.655643	0.640089	0.599252	0.621571	0.633894	0.634473	0.635054	0.623144	0.605734	0.679646	0.689637
													0.883868	0.932027	0.998691	1.05188	0.977881	0.999984	0.914377	0.965115	1.00722	0.955361	0.909135	0.891659	0.937171	0.920315	0.923854	0.935724	0.903361	0.874293	0.850921	0.845586	0.828214	0.872038	0.858018	0.826703	0.80536	0.8977	0.960179	0.976386	1.00048	1.02061	0.901716	0.959412	0.895627	0.947374	0.94127	0.883003	0.823574
														0.459006	0.434723	0.429903	0.376741	0.407472	0.426667	0.429282	0.469379	0.465083	0.5003	0.54086	0.605723	0.594741	0.590541	0.57691	0.577212	0.565905	0.533487	0.509544	0.547986	0.510589	0.529693	0.522977	0.516511	0.563819	0.587011	0.578309	0.576514	0.553845	0.523672	0.537401	0.55296	0.531163	0.51266	0.540742	0.523765
														0.925487	0.940306	0.882238	0.866054	0.850454	0.81523	0.82409	0.791329	0.807408	0.806839	0.790275	0.803449	0.774352	0.715692	0.665294	0.759789	0.773087	0.753144	0.777598	0.855919	0.809434	0.767739	0.750223	0.733489	0.786435	0.777714	0.799827	0.817713	0.807678	0.797886	0.788328	0.778997	0.783537	0.788131	0.792779	0.80341
															0.382254	0.41868	0.475752	0.47097	0.574624	0.482505	0.520212	0.572207	0.658642	0.686967	0.705006	0.713779	0.744361	0.729942	0.642991	0.708077	0.622715	0.61792	0.652954	0.761367	0.709824	0.746092	0.788982	0.809141	0.761857	0.77159	0.749199	0.7562	0.776112	0.794763	0.812742	0.817823	0.797195	0.791599	0.785827
																0.801997	0.596616	0.480826	0.537338	0.647526	0.581607	0.454251	0.372651	0.358106	0.421567	0.343661	0.337326	0.346451	0.367475	0.326142	0.300541	0.278284	0.299646	0.353439	0.329879	0.337247	0.374654	0.367394	0.374166	0.389859	0.36579	0.344967	0.348809	0.337169	0.323277	0.289889	0.275239	0.293355	0.263583
																					0.476838	0.432107	0.400221	0.489087	0.59616	0.581826	0.568164	0.496745	0.551511	0.431246	0.454968	0.417181	0.459161	0.510535	0.574854	0.606572	0.673057	0.628784	0.589977	0.555681	0.525153	0.497805	0.508091	0.475824	0.448222	0.394663	0.428936	0.469728	0.463566
																								0.563021	0.549173	0.583312	0.576679	0.594425	0.585284	0.592945	0.584041	0.560833	0.57113	0.553823	0.5948	0.587738	0.568454	0.539472	0.556505	0.557269	0.566804	0.575499	0.625745	0.628699	0.657347	0.640128	0.607081	0.643872	0.580966
																												0.514572	0.559272	0.520824	0.563595	0.584377	0.537772	0.624172	0.510805	0.595101	0.53901	0.492582	0.475412	0.464055	0.453229	0.458588	0.53635	0.537943	0.539546	0.541158	0.536087	0.53111	0.495114
																																							0.39624	0.465761	0.564867	0.56645	0.568042	0.569643	0.571253	0.514933	0.468722	0.430123	0.456923
																																							0.551461	0.645704	0.649789	0.668813	0.730445	0.775487	0.879396	0.913825	0.831545	0.773807	0.71622
																																								0.462514	0.455587	0.451972	0.463364	0.460934	0.502421	0.491427	0.491316	0.491205	0.483071
																																											0.603537	0.688195	0.682081	0.705777	0.813435	0.701406	0.697797
																																												0.946139	1.03006	0.975366	1.02599	1.03084	1.01128
2nd Tx dose: 10ng INS
0.908126	0.868548	0.805742	0.766547	0.78346	0.779044	0.758919	0.776149	0.765185	0.7664	0.792468	0.796958	0.813236	0.836757	0.878994	0.895146	0.965284	1.04817	1.05575	1.17022	1.10401	1.08483	1.00853	1.01795	0.932751	1.00595	0.961293	0.948214	1.01336	1.09907	1.17169	1.15035	1.12826	1.10479	1.09345	0.984436	0.980683	0.933939	0.937861	0.961284	0.993183	1.04765	1.06898	1.09145	1.07336	1.10669	1.07104	1.10073	1.09686	1.08467
1.32014	1.31741	1.29651	1.29492	1.26544	1.28267	1.24949	1.26826	1.10693	1.23332	1.27564	1.62449	1.52132	1.3256	1.42061	1.93112	2.21592	1.87384	2.02759	1.88748	1.73147	2.00572	2.00345	1.87181	2.30986	1.77825	3.30697	3.35065	3.67567	3.03304	3.14148	3.33597	3.74641	3.39477	4.16323	4.45382	4.27205	3.95448	3.81836	3.7765	3.52886	3.6441	3.85088	3.86562	3.81895	3.80728	3.8982	4.11016	4.31251	4.70044
												1.88035	1.59143	3.51217	4.72512	4.95588	4.29984	5.35732	4.42418	3.9864	4.11432	4.05651	3.65915	3.13295	2.98401	2.02812	1.72825	2.15368	2.14809	2.18923	1.9707	1.8577	2.02112	1.87301	2.01094	2.43096	3.20969	4.00477	3.80305	4.42435	3.78309	3.35694	3.56171	3.57772	3.9314	4.31289	4.06399	4.19324	3.74813
0.926521	0.822457	0.841469	0.870559	0.886242	0.800818	0.750261	0.760835	0.741578	0.744622	0.715016	0.748915	0.780293	0.731137	0.763441	0.81807	0.819477	0.817341	0.774589	0.728063	0.72177	0.726464	0.722809	0.763404	0.77436	0.840992	0.874435	0.901045	0.857988	0.84714	0.83956	0.843592	0.837015	0.817066	0.824095	0.819862	0.817114	0.808527	0.889758	0.845835	0.870355	0.893036	0.91592	0.900525	0.922604	0.902783	0.892841	0.904568	0.900609	0.978433
0.631661	0.704385	0.740708	0.754369	0.867713	0.914177	0.884682	0.842147	0.803515	0.784577	0.803397	0.758045	0.718091	0.781485	0.787202	0.86019	0.802145	0.890507	0.881224	0.847112	0.850944	0.779256	0.725804	0.703519	0.674985	0.649361	0.648144	0.6671	0.61148	0.635713	0.649067	0.614672	0.563121	0.552902	0.752019	0.761683	0.83734	1.34397	1.36524	1.68182	1.82766	1.61047	1.35054	1.53774	1.41639	1.39177	1.37652	1.21128	1.07733	1.03234
0.953334	0.989521	1.14339	1.14641	1.18418	1.25201	1.25349	1.33825	1.28198	1.28901	1.37769	1.34016	1.19416	1.21059	1.14821	1.09517	1.11659	1.13788	1.22478	1.28101	1.32593	1.42181	1.41257	1.38544	1.42018	1.36555	1.32489	1.35023	1.35096	1.35548	1.45537	1.49638	1.51201	1.4708	1.54677	1.44616	1.42482	1.47372	1.43776	1.51875	1.45684	1.43213	1.33124	1.27951	1.3038	1.37674	1.31761	1.30242	1.19911	1.1684
1.218	1.21705	1.28093	1.43296	1.39553	1.42243	1.41998	1.29781	1.24278	1.11141	1.04112	1.03713	1.03362	1.11708	1.11041	1.23656	1.09679	1.00783	0.916503	0.846832	0.806355	0.770425	0.709196	0.794669	0.822142	0.845267	0.893722	0.787991	0.778639	0.769507	0.858651	0.844346	0.766916	0.756269	0.778132	0.858989	0.806361	0.724432	0.79484	0.818142	0.796474	0.93099	0.932169	1.30958	1.19158	1.36582	1.27304	1.40466	1.41101	1.43464
0.617172	0.603482	0.604852	0.574826	0.624899	0.589324	0.599809	0.630385	0.570015	0.576001	0.557677	0.530191	0.523409	0.50636	0.537926	0.529187	0.512028	0.492691	0.516293	0.540441	0.530942	0.539503	0.558266	0.588922	0.596457	0.569003	0.594192	0.558302	0.574573	0.591822	0.561404	0.531034	0.501052	0.48229	0.487848	0.519233	0.485093	0.533244	0.481389	0.513445	0.542066	0.554016	0.563332	0.572967	0.562107	0.551652	0.544242	0.549269	0.516247	0.547277
0.609698	0.563428	0.582698	0.56411	0.553669	0.531852	0.529295	0.536311	0.560182	0.586278	0.614924	0.569047	0.565852	0.49181	0.447812	0.432576	0.46819	0.510194	0.590652	0.446118	0.479024	0.469035	0.486397	0.500822	0.537351	0.548618	0.560368	0.568828	0.626539	0.60925	0.704071	0.833847	0.801125	0.854165	0.803482	0.730612	0.67136	0.640004	0.649074	0.625337	0.601618	0.599907	0.650676	0.662857	0.664244	0.670917	0.67625	0.617455	0.673497	0.628695
0.642989	0.669586	0.712236	0.74559	0.748925	0.75229	0.694616	0.685597	0.614458	0.604282	0.592644	0.574175	0.567676	0.551709	0.57756	0.599747	0.632646	0.63595	0.638239	0.598719	0.588959	0.578578	0.568556	0.584163	0.61753	0.624032	0.618184	0.617389	0.564625	0.567625	0.570657	0.555916	0.557972	0.585368	0.621367	0.61776	0.644848	0.647988	0.622526	0.634946	0.586431	0.632982	0.639508	0.641541	0.645779	0.66383	0.642842	0.703901	0.71226	0.744513
0.798858	0.756955	0.712106	0.724772	0.756426	0.792133	0.780612	0.792369	0.830432	0.818022	0.82517	0.811039	0.775469	0.773085	0.818992	0.838091	0.844162	0.841465	0.840252	0.891161	0.850363	0.810597	0.915522	0.826605	0.759643	0.789818	0.776381	0.741926	0.838566	0.760075	0.74722	0.744839	0.742474	0.642315	0.694247	0.755315	0.70259	0.689628	0.837794	0.80621	0.975812	0.913989	0.843667	0.866359	1.0169	1.0342	0.98077	0.878746	0.695465	0.849307
0.658785	0.654291	0.645607	0.629128	0.588327	0.613401	0.613686	0.609364	0.597948	0.590144	0.582541	0.591229	0.583898	0.577736	0.571703	0.603145	0.637644	0.65888	0.681578	0.695143	0.681121	0.667296	0.630949	0.611109	0.588338	0.576223	0.561918	0.563736	0.574058	0.58779	0.603079	0.620819	0.654467	0.683694	0.698455	0.695051	0.682942	0.673312	0.666549	0.660344	0.64796	0.636031	0.634196	0.642873	0.644988	0.659518	0.654971	0.637489	0.641205	0.626304
0.715511	0.689691	0.687489	0.703055	0.762657	0.779093	0.852683	0.937538	0.979862	1.09188	1.15504	0.971108	1.09329	1.1246	1.15774	0.917931	0.860272	1.01427	0.940591	0.959501	0.905344	0.935173	0.950671	0.930375	0.921944	0.913664	0.905532	0.897784	0.890167	0.877856	0.870748	0.84065	0.869848	0.86682	0.924312	0.907246	0.856731	0.872442	0.931264	1.15106	1.06972	1.06578	1.10053	1.13763	1.17731	1.19479	1.2128	1.27155	1.15605	1.26704
0.986475	0.562519	0.393433	0.342889	0.347939	0.35314	0.342938	0.366114	0.382408	0.375604	0.379839	0.38417	0.435727	0.454168	0.474238	0.455187	0.437606	0.485696	0.460027	0.498505	0.492648	0.486927	0.495555	0.481549	0.486409	0.480254	0.503571	0.495077	0.480884	0.489385	0.505969	0.514077	0.489613	0.506022	0.502614	0.500537	0.506577	0.513327	0.513883	0.563488	0.615056	0.643937	0.674608	0.670094	0.69353	0.651214	0.673522	0.668724	0.669284	0.666845
1.10174	1.094	1.08769	1.07795	1.02081	1.02276	0.993629	1.01502	0.94865	0.936483	0.886892	0.929079	0.920319	0.911142	0.705277	0.662717	0.589016	0.611669	0.645527	0.717223	0.830986	0.807073	0.814925	0.822644	0.845362	0.894541	0.896653	0.951092	0.892364	0.872047	0.872116	0.8572	0.871018	0.875159	0.885458	0.868786	0.841329	0.877872	0.907899	0.922807	0.95281	0.958873	0.922725	0.899312	0.871973	0.792771	0.851485	0.870055	0.870667	0.91373
18.2116	14.6324	15.8832	5.92277	2.98123	1.99193	1.49562	0.859638	0.982061	1.14514	1.37317	1.22728	1.10941	1.23793	1.40014	1.29624	1.20671	2.88307	1.40454	1.72298	1.82471	1.55813	2.4243	1.77001	1.9449	2.09907	2.36983	2.37476	2.6527	2.82565	3.14113	2.863	3.11237	3.24096	3.15474	3.073	3.55526	3.05851	3.26138	3.01599	3.65829	3.26187	3.29793	2.91865	3.29225	3.01521	2.82375	2.95793	2.57089	2.77191
																			3.5	3.83461	4.05497	3.2517	2.78436	2.68434	2.43286	2.70237	2.15372	1.91841	2.21488	1.88751	2.88765	2.57023	2.65964	2.7555	3.22739	3.8943	2.76379	2.62467	2.42574	3.80717	3.45684	3.16187	2.91328	3.0808	1.54789	2.69048	2.02831	1.94202	3.02709
																												1.2229	1.19946	1.30613	1.335	1.36516	1.27332	1.36221	0.998874	1.47623	1.31375	1.55253	1.45964	1.61391	1.7801	1.41395	1.3241	2.36386	1.45293	1.33488	1.43188	1.21973	1.29369
1.10166	1.06216	0.989907	0.97977	0.861961	0.917338	1.07843	1.05619	1.14879	1.14815	1.14752	1.20846	1.15642	1.18915	1.27545	1.30047	1.32649	1.35357	1.31849	1.28518	1.25351	1.31889	1.28166	1.24884	1.19787	1.13969	1.15814	1.1772	1.22565	1.2628	1.25114	1.23969	1.29493	1.27035	1.33444	1.33569	1.33693	1.28952	1.31498	1.39138	1.20387	1.33753	1.42892	1.5431	1.54264	1.54217	1.54171	1.52015	1.62892	1.41864
0.813364	0.84801	0.81896	0.844083	0.903306	0.91144	0.94993	0.953222	0.925765	0.901675	0.852159	0.871228	0.910315	0.881096	0.923122	0.918771	0.97335	0.988208	1.00353	1.06728	0.985836	1.02867	1.00891	0.995042	0.960405	0.928099	0.909845	0.952581	0.99953	1.05135	0.961775	0.986673	1.00429	1.02254	1.01451	1.04372	1.06371	1.08447	1.02649	0.974391	0.954997	0.904491	0.859058	0.817972	0.76278	0.772398	0.828472	0.804004	0.73378	0.687589
0.411299	0.415854	0.433496	0.417124	0.441321	0.444529	0.474187	0.540872	0.577758	0.585681	0.5786	0.564412	0.571159	0.579186	0.485367	0.520928	0.562112	0.546052	0.555201	0.543369	0.532902	0.52283	0.516869	0.5389	0.505563	0.527537	0.528306	0.493553	0.493113	0.519906	0.472041	0.504811	0.509225	0.51883	0.542448	0.55935	0.594679	0.630438	0.641556	0.657253	0.683669	0.655609	0.657755	0.673957	0.68083	0.629726	0.59764	0.618861	0.624365	0.686444
0.65287	0.668686	0.70139	0.70144	0.704624	0.602216	0.586013	0.584614	0.69103	0.723811	0.940403	0.926124	0.882049	0.884466	0.931493	0.919993	0.886358	0.895154	0.873034	0.822994	0.836343	0.715869	0.574665	0.602821	0.59543	0.607599	0.634705	0.585798	0.490172	0.421386	0.453464	0.441293	0.463488	0.527434	0.536857	0.560107	0.629301	0.637337	0.645581	0.624662	0.580157	0.589647	0.599452	0.601171	0.6029	0.616062	0.625354	0.640676	0.656766	0.641074
0.290869	0.314402	0.306152	0.324414	0.354787	0.363574	0.41682	0.369409	0.379376	0.389896	0.400651	0.425951	0.454662	0.465839	0.477579	0.51129	0.491691	0.473538	0.452644	0.433516	0.399952	0.411634	0.369413	0.422736	0.461663	0.400174	0.386561	0.387704	0.470579	0.430676	0.51151	0.446005	0.518341	0.536668	0.591888	0.571658	0.582115	0.700909	0.660472	0.656406	0.652389	0.65795	0.663605	0.626842	0.653982	0.647891	0.598465	0.546627	0.586347	0.5659
0.989296	0.896679	1.1585	1.13625	1.11483	1.04932	1.07905	1.11053	1.1439	1.17933	1.21703	1.13475	1.0629	0.9996	0.918839	1.08833	1.03496	0.986575	1.04776	0.919016	0.818449	0.73772	0.864303	1.05313	0.930424	0.889668	0.852332	1.10797	1.20255	0.968612	0.931948	0.857123	0.839578	0.822736	0.979296	0.829075	0.851744	0.960894	0.869933	0.822078	0.803006	0.990846	0.744094	0.744728	0.865093	0.813575	0.789527	0.697996	0.656168	0.625515
																																					6.94146	6.57395	6.11053	6.15481	5.87498	5.98957	4.95646	5.07845	4.75012	4.46762	4.4751	5.24846	4.61882
0.904169	1.11541	0.950114	0.924355	0.81542	0.729454	0.676039	0.629912	0.604306	0.555574	0.540343	0.505877	0.491982	0.442571	0.452216	0.462291	0.472825	0.497479	0.482525	0.456678	0.496506	0.50072	0.505007	0.521786	0.527306	0.532945	0.534983	0.537037	0.569965	0.511591	0.524723	0.520334	0.516018	0.511772	0.469524	0.471503	0.434046	0.445392	0.41611	0.446496	0.405528	0.428738	0.430824	0.449716	0.438797	0.461772	0.470764	0.486805	0.489796	0.502593
3.19354	2.58737	2.75389	3.01172	2.28864	2.36302	2.39672	2.24017	2.03246	1.92761	1.74292	1.71471	1.68741	1.74738	1.63688	1.53952	1.4531	1.65468	1.65604	1.65741	1.95075	1.3152	1.32213	1.12758	1.12323	1.11891	1.12832	0.997577	0.893986	0.897911	0.940027	0.986288	1.03734	1.09396	0.973569	1.05233	1.03362	1.03015	1.11443	1.1202	1.18023	1.24707	1.32193	1.40635	1.50229	1.61227	1.73964	1.74352	1.74743	1.75135
2.62452	2.26875	2.30898	2.30608	2.41008	2.48856	2.48169	2.44648	2.07672	2.35567	2.37737	2.39946	2.22196	2.06891	2.24572	2.3505	2.27123	2.33887	2.41065	3.46176	3.1157	2.83254	2.43227	2.35181	2.2765	2.49988	2.77186	3.11025	2.30243	2.90865	2.71801	2.2187	3.77243	3.63737	4.30247	4.07978	4.45067	3.78688	4.6591	3.68328	4.67016	4.70908	4.2644	3.76314	3.80234	3.16396	3.44535	3.30257	3.36421	3.36852
0.893937	0.869958	0.873086	0.880193	0.907832	0.839396	0.848364	0.802254	1.07696	1.0809	1.08486	1.08885	1.09288	1.09693	0.993546	1.10363	1.00727	0.926378	0.857516	0.798183	0.76686	0.737902	0.724315	0.703897	0.712625	0.75248	0.797058	0.847251	0.817472	0.789716	0.86472	0.955466	0.926805	0.899813	0.874349	0.850286	0.827512	0.773795	0.799754	0.828523	0.85944	0.892753	0.928753	0.929583	0.923191	0.916887	0.884367	0.891245	0.813939	0.88485
0.639829	0.622464	0.615495	0.558001	0.63098	0.725922	0.854495	1.03842	0.995415	1.02679	1.09622	1.20177	1.13344	1.15436	1.36014	1.46694	1.52222	1.51785	1.45636	1.42148	1.25581	1.33462	1.49112	1.53803	1.4985	1.42156	1.37917	1.64927	1.45841	1.30715	1.28332	1.36485	1.45718	1.11903	0.959705	0.977993	0.996991	1.01674	1.56074	1.02785	1.36795	1.34934	1.33123	1.3136	1.29644	1.27792	1.13371	1.22338	1.24919	1.32097
																																			0.459829	0.484265	0.511444	0.541855	0.576112	0.614992	0.6595	0.710953	0.771114	0.670548	0.593187	0.53183	0.540727	0.525328	0.510783
0.590706	0.538377	0.540608	0.558167	0.590951	0.631595	0.628025	0.661026	0.59747	0.627592	0.660913	0.553205	0.569878	0.537538	0.530854	0.524334	0.557485	0.559002	0.564713	0.570055	0.565462	0.64734	0.554	0.580045	0.616356	0.574134	0.543337	0.508234	0.53429	0.463246	0.448629	0.403349	0.408086	0.44607	0.471377	0.490674	0.511926	0.493455	0.518957	0.527058	0.507984	0.498587	0.454842	0.422866	0.426119	0.424478	0.425514	0.46442	0.504167	0.48943
0.514599	0.511392	0.500916	0.480795	0.537813	0.558115	0.579919	0.551463	0.610839	0.541569	0.560951	0.637661	0.643384	0.566226	0.603107	0.616387	0.657091	0.703551	0.658013	0.61929	0.644207	0.630927	0.618184	0.661427	0.602319	0.671279	0.758071	0.768161	0.778524	0.78917	0.800111	0.822433	0.796943	0.772985	0.769689	0.928498	0.770428	0.765454	0.907083	0.860065	0.85793	0.824333	0.920359	0.883854	1.03361	0.836419	0.877732	0.895957	0.914955	0.931077
0.738615	0.780847	0.693963	0.797591	0.782923	0.726928	0.7002	0.720947	0.727745	0.80669	0.840017	0.890249	0.94687	0.930355	0.94413	0.958319	0.972941	0.953061	0.933978	0.915645	0.898017	0.871349	0.776161	0.866307	0.849506	0.914679	0.848714	0.871424	0.824844	0.796851	0.770695	0.758822	0.830612	0.786779	0.69649	0.91837	0.739147	0.736674	0.951722	0.730912	0.810075	0.821431	0.802211	0.781773	0.776758	0.709527	0.775257	0.74321	0.769756	0.750126
0.411967	0.467306	0.482997	0.524495	0.621497	0.752438	0.725128	0.701238	0.661177	0.811736	0.728444	0.69989	0.777808	0.823418	0.784996	0.789453	0.809124	0.829801	0.851563	0.874496	0.898699	0.92428	0.951359	0.980074	0.977435	1.00899	1.04265	1.24412	1.54208	2.02772	1.32299	0.981773	1.08223	0.98646	1.17299	1.12656	1.17216	1.22004	1.19838	1.31878	1.36621	1.2207	1.1032	1.00634	0.883361	0.987864	1.12041	1.12325	1.1261	1.30937
0.745355	0.755059	0.788982	0.796197	0.752993	0.780486	0.831334	0.838394	0.840497	0.809944	0.81089	0.795889	0.832929	0.894643	0.873513	0.869028	0.853387	0.848538	0.771289	0.650284	0.62301	0.59391	0.54799	0.573718	0.598962	0.627089	0.609511	0.605466	0.604701	0.559467	0.538093	0.609514	0.573583	0.592557	0.603978	0.564722	0.554266	0.594962	0.641345	0.652373	0.657199	0.642811	0.616838	0.641459	0.607948	0.64523	0.663417	0.682658	0.654836	0.696734
2.35375	2.32085	2.96332	2.74564	2.38078	2.91063	2.39975	2.49702	2.41985	2.04905	3.61026	1.96434	2.10555	1.9474	1.78999	1.51246	1.51698	1.17348	1.01622	0.9676	0.970792	0.888084	0.950691	0.916922	0.850693	0.657073	0.764755	0.709702	0.680274	0.774736	0.645259	0.890654	0.811036	0.788944	0.768023	0.735316	0.70528	0.872383	1.0913	1.04405	1.0151	0.966327	0.975048	1.04208	1.1606	1.15619	1.16943	1.06022	0.983888	0.917811
1.68858	1.77201	1.78966	1.62566	1.82192	2.15853	2.18994	3.55219	2.11621	1.56266	1.2724	0.836994	0.696089	0.792656	0.84582	0.906628	0.976857	1.05888	1.53603	2.16819	2.25923	2.31643	2.11641	2.25595	2.41519	2.16599	2.58304	2.63128	2.68135	2.56866	2.46505	1.86251	2.06264	2.2962	2.5894	2.5493	2.51043	2.47273	2.33573	2.21311	2.37697	1.9476	1.99624	2.09259	1.83875	1.54866	1.59169	1.61325	1.69566	1.62822
0.771796	0.684538	0.652717	0.640651	0.60342	0.672905	0.784944	0.808708	0.958081	0.979237	1.0797	1.09079	1.12667	1.16498	1.206	1.21524	1.24018	1.26616	1.29326	1.32153	1.35108	1.38197	1.41431	1.42803	1.40472	1.29692	1.51604	1.49074	1.42222	1.44207	1.44188	1.37949	1.2693	1.19253	1.1247	1.05984	0.998386	0.823075	0.889489	0.913622	0.91637	0.919135	0.901788	0.886459	0.871643	0.857313	0.843447	0.793891	0.736101	0.728648
	0.708346	0.660419	0.782857	0.824514	0.767366	0.811109	0.814668	0.793407	0.785121	0.861022	0.851078	0.87787	0.897247	0.959219	0.962587	0.984785	0.914541	1.02086	1.02495	1.02686	1.03698	0.952907	0.846914	0.799001	0.843089	0.670926	0.665681	0.74755	0.774605	0.773147	0.74274	0.804361	0.876963	1.02721	1.08787	1.07489	1.0277	0.820842	0.78776	0.802572	0.817879	0.861751	1.03337	1.09554	1.17597	1.20617	1.2763	1.32069	1.28087
	2.50545	2.49224	2.50809	1.49971	1.37744	1.2736	1.15307	0.953451	0.983956	0.939866	0.899557	1.11351	1.0548	1.01905	0.974305	1.08217	1.22549	1.19353	1.16554	1.30408	1.23164	1.2348	1.39156	1.29963	1.06068	1.06438	1.92714	1.89043	1.8551	2.29278	1.01733	1.72163	1.07116	1.05083	1.0091	1.02084	1.53289	1.03797	1.03976	1.41971	1.61093	1.55923	1.37339	1.53014	1.58081	1.77593	1.86988	1.78593	0.938478
	0.228883	0.238064	0.252951	0.269823	0.289107	0.275425	0.276232	0.313434	0.319502	0.32581	0.368485	0.369342	0.370203	0.371068	0.402766	0.440386	0.436739	0.435032	0.45994	0.487873	0.493578	0.463803	0.488616	0.516233	0.547159	0.489341	0.507237	0.531774	0.490699	0.549321	0.537646	0.543582	0.533632	0.615205	0.604692	0.594533	0.58471	0.593294	0.602134	0.601378	0.579821	0.523249	0.560846	0.543178	0.566913	0.589932	0.61321	0.638399	0.637708
														31.7993	34.0927	32.3389	23.469	24.1895	17.3448	17.6049	19.2721	18.5205	23.6728	25.6226	25.5429	31.2491	24.974	23.8471	31.7414	30.7908	28.4467	31.1868	24.5678	27.2693	24.0291	23.8223	21.9083	22.1322	25.8168	19.1394	19.867	20.9969	22.1837	28.5103	27.6127	27.6902	25.4295	20.6347	24.1027
		0.566577	0.543575	0.585467	0.592282	0.598939	0.617907	0.62402	0.623798	0.623577	0.623355	0.597473	0.658597	0.625544	0.651377	0.679435	0.658155	0.841843	0.906376	0.901769	0.939686	0.858409	0.798073	0.81215	0.740304	0.745993	0.75952	0.768458	0.789533	0.809516	0.868218	0.966423	1.01132	0.922277	0.94474	0.935637	0.860185	0.982324	1.00986	0.951621	0.918878	0.987391	0.908671	0.881955	0.888938	0.875466	0.823561	0.857943	0.855904
		1.64456	1.39173	1.13598	0.966876	0.746215	0.607557	0.602126	0.596791	0.59155	0.5864	0.581339	0.548754	0.546635	0.544531	0.562665	0.557102	0.551648	0.5463	0.523851	0.521521	0.519197	0.486585	0.462119	0.452905	0.444051	0.437159	0.459248	0.460471	0.46248	0.470918	0.476077	0.453835	0.449403	0.433461	0.418612	0.43846	0.461792	0.457965	0.490191	0.469376	0.449456	0.425902	0.432252	0.473483	0.475932	0.47818	0.455664	0.458697
		0.817178	0.799911	0.757883	0.769171	0.794753	0.822096	0.851387	0.807704	0.816424	0.768337	0.761314	0.754419	0.735032	0.793823	0.825685	0.800278	0.776388	0.789854	0.760907	0.81127	0.782512	0.736283	0.720317	0.705029	0.6906	0.684855	0.664455	0.674429	0.676988	0.679566	0.682163	0.668241	0.654876	0.642034	0.629687	0.64132	0.65339	0.665924	0.742255	0.752754	0.634462	0.657663	0.659627	0.661604	0.663592	0.665592	0.637453	0.611598
			0.615809	0.580097	0.578644	0.595758	0.593274	0.601062	0.596351	0.590858	0.600742	0.598553	0.605027	0.640637	0.632042	0.644745	0.656556	0.672357	0.673121	0.680701	0.665646	0.680641	0.678836	0.685955	0.681611	0.685013	0.682952	0.683288	0.682589	0.678027	0.683967	0.690623	0.698432	0.69607	0.688802	0.682354	0.680036	0.675589	0.687898	0.696117	0.70333	0.72203	0.731891	0.723383	0.724931	0.726514	0.729874	0.717066	0.718918
											0.338047	0.263791	0.216283	0.251347	0.299981	0.371951	0.36908	0.366252	0.363468	0.360726	0.358024	0.364971	0.372192	0.379705	0.593154	1.35468	0.679437	0.453426	0.493003	0.443185	0.517532	0.621853	0.778847	1.04188	0.601617	0.422909	0.563557	0.84437	0.803503	0.778413	0.831293	0.841254	0.851458	0.861911	1.02781	1.06304	1.04067	0.954216	1.04036
			0.722419	0.766063	1.00945	0.673571	0.670571	0.765673	0.717171	0.756065	0.79942	0.776301	0.693912	0.574134	0.489619	0.507998	0.526476	0.568605	0.805274	0.569937	0.582572	0.512243	0.606861	0.630512	0.823672	0.695988	0.795226	0.773937	0.87931	0.791438	0.839497	0.988508	0.70011	0.693957	0.679696	0.768955	0.698782	0.765493	0.846288	0.926685	1.15516	1.21723	1.42473	1.31055	1.44213	1.37686	1.42486	1.49399	1.57016
				0.408587	0.437176	0.399384	0.408327	0.416664	0.415447	0.410499	0.413038	0.406564	0.415411	0.434415	0.455241	0.488301	0.504695	0.517852	0.514428	0.515774	0.508353	0.506284	0.504033	0.516863	0.516289	0.532091	0.53537	0.553787	0.547177	0.555061	0.557492	0.562713	0.574316	0.584967	0.589995	0.59699	0.592839	0.589091	0.607481	0.613244	0.619583	0.628605	0.63044	0.655298	0.659259	0.658989	0.654073	0.650049	0.661213
					0.878582	0.912363	0.953863	0.959678	0.977622	0.955078	0.933551	0.942678	0.844351	0.817561	0.859284	0.907108	0.978607	0.99577	1.03586	1.01067	1.04107	1.04247	1.04387	1.01999	1.03731	1.06264	0.991017	0.988188	0.91832	0.856171	0.864382	0.868532	0.87729	0.928285	0.983464	1.01915	1.03588	1.04707	1.02654	0.985541	0.996035	0.915075	0.943758	0.92944	0.944763	0.946583	0.917076	0.927382	0.933256
					1.35844	1.41818	1.25014	1.18853	1.11426	1.1863	1.08647	1.06776	1.04968	1.00501	0.984897	1.09515	1.13195	1.11307	1.15751	1.17631	1.23907	1.23836	1.21309	1.18883	1.2553	1.3069	1.3364	1.38931	1.4086	1.34009	1.27793	1.19247	1.10087	1.08617	1.01898	1.05497	1.0514	1.01645	1.0435	1.08564	1.04951	1.02981	1.03208	0.974992	1.02683	0.988252	1.08424	1.00568	0.990036
						2.83633	1.73112	1.69724	1.82058	1.27608	2.51565	2.51585	2.56043	2.44629	2.22393	2.98852	2.4257	1.92212	1.89709	1.95123	2.18227	2.32556	2.37529	2.29987	2.38489	2.28726	2.09115	1.7934	1.54189	1.26729	1.42389	1.30987	1.33058	1.05776	0.771816	0.736553	0.755079	1.0373	1.23094	1.37066	1.29763	1.27528	1.07359	0.934853	1.00963	0.85757	0.779523	0.86444	0.820951
							0.789175	0.958674	0.927244	0.864089	0.937356	0.969006	1.00287	1.03918	1.02651	1.01415	1.00208	0.990291	0.978779	0.954021	0.930484	0.817885	0.790541	0.802773	0.730993	0.701939	0.799896	0.798054	0.854299	0.878037	0.952657	0.917035	0.902235	0.925368	0.878074	0.871595	0.945723	1.00547	0.957011	0.982146	1.00059	1.01481	1.14436	1.09769	1.05894	1.1233	1.17505	1.22166	1.32874
								0.839442	0.783909	0.834468	0.794589	0.808634	0.800659	0.828248	0.879308	0.970669	1.06509	1.07031	0.978615	0.921156	0.856055	0.853494	0.833755	0.824955	0.883595	0.934299	1.06392	1.24239	1.17694	1.16214	1.00153	0.969312	1.01347	1.04147	1.09809	1.12837	1.24022	1.37548	1.14598	1.02263	1.03213	1.08548	1.16583	1.01748	0.947584	1.03248	1.06337	0.971317	1.09721
									0.512609	0.534252	0.691869	0.553818	0.567112	0.58106	0.593332	0.602512	0.59154	0.565841	0.534467	0.494835	0.488918	0.464484	0.437581	0.450832	0.448493	0.447918	0.443274	0.448778	0.433324	0.425165	0.418182	0.41209	0.41309	0.39728	0.409854	0.421768	0.401702	0.405891	0.402929	0.395381	0.387976	0.3949	0.362624	0.364253	0.354685	0.364001	0.369989	0.3854	0.400782
											0.9063	0.994291	0.892553	0.903942	0.915626	1.20631	1.12006	1.04533	0.979941	0.922252	0.870978	0.818584	0.772136	1.09563	0.966576	0.864723	0.782289	0.91205	0.859072	0.811911	0.769658	0.748504	0.728482	0.758883	0.791931	0.827988	0.983195	0.862191	0.850551	0.839221	0.828189	0.817443	0.75632	1.06382	1.06105	0.780845	0.604019	0.869051	0.606842
																																	1.01068	0.9501	0.934961	0.889134	0.888344	0.888292	0.885546	0.900293	0.915539	0.907916	0.900419	0.893044	0.88579	0.886512	0.877583	0.868832	0.898305
																			0.687113	0.9001	0.70597	0.61895	0.673623	0.612883	0.666516	0.738584	0.690796	0.720754	0.942147	1.00601	1.01313	1.18221	1.15274	1.39328	1.38264	1.2398	0.936939	1.14798	1.07577	0.993123	0.997094	1.17812	0.965808	1.23021	1.45119	1.7988	1.87358	1.6892	1.61874
																									0.623807	0.696069	0.708053	0.657646	0.654028	0.665485	0.683797	0.776545	0.822707	0.874703	0.672506	0.632809	0.779865	0.69166	0.73904	0.766367	0.795792	0.787181	0.695038	0.715239	0.66251	0.727571	0.735565	0.736977	0.708231
																										0.921956	1.30934	1.24327	1.18701	1.18325	1.23273	1.30498	1.19844	1.39209	1.56516	1.32493	1.42751	1.27888	1.31902	1.36079	1.44164	1.40932	1.19104	1.36295	1.10038	1.31088	1.46939	1.58822	1.70669
																												2.00947	1.71554	2.43478	2.43544	2.4361	2.43676	2.39426	2.35323	2.31358	2.60192	2.97237	3.46582	1.27655	0.782353	1.21649	2.73313	3.04016	3.4249	3.92113	1.75669	1.13189	0.834931
																																																	0.791363
																																									1.27863	1.22186	1.29509	1.21677	1.14739	1.08549	1.16909	1.01277	0.951889
																																											0.84209	0.866434	0.579692	0.624123	0.67593	0.737116	0.810482
0.795844	0.796001	0.788909	0.726461	0.705418	0.664042	0.661546	0.637983	0.639975	0.649471	0.686388	0.71977	0.72104	0.711631	0.644425	0.62292	0.654278	0.71132	0.730008	0.68438	0.686778	0.643407	0.631041	0.632766	0.663928	0.682903	0.724207	0.755365	0.764449	0.773755	0.852058	0.782112	0.750569	0.738794	0.749555	0.717532	0.708271	0.690324	0.670188	0.686796	0.782889	0.781442	0.694928	0.719943	0.68837	0.654545	0.615478	0.60966	0.619587	0.558039
1.4007	1.35346	1.24445	1.26738	1.24888	1.27123	1.19602	1.27867	1.27291	1.24512	1.18069	1.01914	1.03708	1.12286	1.15584	1.19082	1.31479	1.4011	1.37731	1.23521	1.18364	1.09856	1.06691	1.09733	1.1747	1.08223	1.1121	1.13621	1.14046	1.02255	1.05895	1.03221	0.916545	0.79258	0.689686	0.732287	0.655183	0.644549	0.709475	0.674266	0.669079	0.672407	0.608373	0.717573	0.694412	0.639396	0.625738	0.701483	0.737452	0.759296
0.674883	0.776998	0.771554	0.713389	0.759591	0.743194	0.753835	0.794688	0.749713	0.715436	0.768646	0.788947	0.758697	0.768205	0.778368	0.797247	0.816805	0.834726	0.859931	0.771887	0.729513	0.722663	0.713315	0.692446	0.658624	0.649245	0.674148	0.625538	0.642858	0.638693	0.659052	0.642139	0.63979	0.639726	0.624282	0.655716	0.633552	0.645381	0.625737	0.624169	0.640528	0.628152	0.625656	0.65914	0.680007	0.670532	0.678483	0.720804	0.678912	0.689639
0.816108	0.891413	0.956726	0.991014	0.922499	0.847691	0.847877	0.827848	0.817566	0.790624	0.79695	0.824173	0.8135	0.78289	0.846187	0.802971	0.80656	0.851461	0.807096	0.770237	0.757298	0.714532	0.711269	0.717558	0.682131	0.660515	0.633928	0.607942	0.592016	0.576902	0.591846	0.62226	0.654847	0.620221	0.59142	0.604076	0.605218	0.613576	0.61731	0.636298	0.64053	0.613285	0.656218	0.603501	0.552561	0.578944	0.577834	0.56286	0.581818	0.580595
0.694254	0.730952	0.792122	0.843392	0.805205	0.847519	0.849477	0.860162	0.847935	0.824446	0.860541	0.852505	0.877159	0.985018	0.938562	1.03637	1.0852	1.1618	1.20396	1.38093	1.48425	1.51132	1.65315	1.6362	1.68828	1.53962	1.59551	1.63301	1.319	1.47259	1.44099	1.62163	1.61634	1.66798	1.75141	1.53458	1.4357	1.43494	1.42821	1.39135	1.43573	1.52338	1.4285	1.38747	1.38707	1.30783	1.3408	1.51509	1.74146	2.00523
0.351777	0.33769	0.344907	0.389168	0.409604	0.402624	0.48127	0.476773	0.44612	0.490566	0.473176	0.455811	0.432684	0.432352	0.420083	0.425893	0.428145	0.43042	0.443511	0.457423	0.472236	0.48804	0.504939	0.52305	0.542509	0.563472	0.586119	0.585024	0.540509	0.494527	0.448807	0.501085	0.478358	0.493389	0.509396	0.526476	0.490654	0.542244	0.469443	0.498177	0.484784	0.468626	0.462915	0.429473	0.457104	0.443691	0.450771	0.485099	0.525086	0.543847
0.381416	0.489657	0.457654	0.521574	0.481722	0.541784	0.649303	0.605651	0.668095	0.799501	1.07965	1.25852	1.33766	1.6053	1.97039	2.39735	2.64214	2.69372	2.5769	3.07916	2.58657	2.08669	2.29264	2.05948	2.03938	1.85883	1.62539	1.61837	1.73462	1.69965	1.79783	1.88446	1.76908	1.97006	1.87926	1.76527	1.64648	1.48475	1.42307	1.36632	1.19328	1.18537	1.13377	1.06842	1.1316	1.02895	1.12126	1.18659	1.17527	1.152
0.773836	0.822302	0.807136	0.815752	1.07268	1.0975	1.15892	1.15751	1.1561	1.1547	0.837643	0.920551	0.984851	1.05881	1.09466	1.3317	1.40244	1.48112	1.22462	1.33904	1.3834	1.40934	1.30305	1.42211	1.37441	1.3931	1.3783	1.34799	1.31899	1.41415	1.2892	1.31847	1.3491	1.40122	1.38773	1.46448	1.46712	1.46978	1.47244	1.39237	1.3731	1.35519	1.347	1.33891	1.37891	1.47034	1.44372	1.42255	1.5085	1.5749
0.483533	0.476683	0.47055	0.453399	0.480092	0.54044	0.520289	0.633643	0.645969	0.643923	0.640852	0.519864	0.529649	0.539809	0.585326	0.604061	0.503527	0.511426	0.519577	0.508597	0.498071	0.487972	0.478275	0.468955	0.459992	0.451365	0.450354	0.449347	0.501699	0.400163	0.332808	0.357266	0.385604	0.418824	0.458307	0.50601	0.713491	0.518494	0.643028	0.56096	0.591873	0.712952	0.667186	0.626941	0.652042	0.629711	0.621665	0.636669	0.653696	0.55801
0.285359	0.310952	0.341587	0.37892	0.425413	0.484912	0.56376	0.556962	0.575361	0.549078	0.566118	0.525961	0.58821	0.551208	0.579061	0.561318	0.544629	0.67406	0.62888	0.49987	0.50421	0.644464	0.643615	0.558918	0.605057	0.670538	0.576939	0.619798	0.615835	0.611922	0.608059	0.604244	0.600476	0.596756	0.593081	0.751671	0.7476	0.743573	0.739589	0.683233	0.634857	0.550234	0.494332	0.578155	0.53128	0.599252	0.572115	0.453295	0.562177	0.559036
													2.72179	2.58047	2.4531	2.6962	2.91796	2.56747	2.08197	1.75088	2.98606	2.98405	2.93791	3.11723	2.95271	3.1836	3.9696	4.0182	4.79999	4.19458	3.72478	5.08426	5.86522	4.91467	5.22254	5.57155	8.39165	7.9308	7.92633	9.02378	6.64341	6.65018	5.85828	6.73643	5.26487	4.18591	6.90581	5.81468	3.94649
0.650754	0.597009	0.529334	0.60128	0.561175	0.688223	0.744832	0.700007	0.867984	0.854908	0.842221	0.814065	0.826294	0.802955	0.780899	0.740162	0.798515	0.838031	0.881662	0.858807	0.791643	0.837994	0.814826	0.769496	0.791371	0.687045	0.709956	0.655213	0.648065	0.664175	0.676277	0.696783	0.729164	0.7647	0.803878	0.847287	0.774024	0.712422	0.745584	0.781983	0.82212	0.866599	0.916167	0.920633	0.8905	0.877337	0.835412	0.797311	0.810604	0.808228
0.68259	0.651572	0.693645	0.692639	0.697947	0.740169	0.757809	0.794672	0.754983	0.721346	0.729072	0.735379	0.771934	0.803095	0.888822	0.918533	0.896037	0.954062	0.907421	0.901988	0.814799	0.815304	0.838307	0.907272	0.92829	0.852397	0.790115	0.770022	0.816001	0.759758	0.748263	0.742376	0.742965	0.696862	0.705566	0.748189	0.755753	0.802226	0.721911	0.690954	0.67209	0.731106	0.719595	0.715353	0.701874	0.531343	0.569995	0.614711	0.66704	0.729108
																																					0.873801	0.875327	0.876857	0.878393	0.894008	0.910189	0.926965	0.944372	0.962445	0.981224	1.00075	1.02561	1.05175
0.695493	0.748013	0.843359	0.830491	0.81801	0.832472	0.897298	0.828836	1.06627	1.03218	0.952208	0.833501	0.847939	0.843912	0.7822	0.728898	0.798755	0.691577	0.609759	0.545252	0.493088	0.450033	0.413893	0.383127	0.345486	0.351121	0.418896	0.419417	0.458391	0.47011	0.491482	0.50138	0.506328	0.511374	0.516522	0.610439	0.654656	0.705777	0.723148	0.692639	0.725479	0.715793	0.784866	0.669089	0.662089	0.538876	0.554994	0.803026	0.902272	1.10857
0.880384	0.91246	0.915564	0.927572	0.86417	0.887879	0.951391	0.860183	0.926619	1.01258	1.02267	1.01149	0.958608	0.840044	0.908654	0.950386	1.07123	1.12308	1.3037	1.38093	1.36615	1.43238	1.46088	1.49603	1.55259	1.54083	1.51404	1.58263	1.62186	1.7393	1.56369	1.49674	1.47123	1.35611	1.20763	1.13865	1.07711	1.00969	0.950207	1.06813	0.996867	0.94636	0.987876	0.974708	0.936289	0.918718	0.946657	0.880048	0.972533	1.05135
0.321508	0.322479	0.343098	0.348566	0.390901	0.388466	0.386061	0.398486	0.389272	0.373505	0.378649	0.37784	0.377034	0.361996	0.361306	0.394388	0.409131	0.455808	0.450842	0.47159	0.49434	0.459804	0.429779	0.421935	0.409456	0.423064	0.417544	0.424515	0.431723	0.445834	0.489344	0.499732	0.51105	0.527134	0.579142	0.668319	0.760187	0.81174	0.785676	0.796783	0.791594	0.814458	0.813274	0.813479	0.800678	0.770663	0.746327	0.675159	0.73612	0.685105
0.72169	0.727662	0.585467	0.565568	0.546724	0.529096	0.616787	0.630565	0.723103	0.812269	0.850656	0.804762	0.818219	0.738795	0.775744	0.801906	0.626718	0.586148	0.479702	0.644953	0.682451	0.711775	0.715212	0.604049	0.550799	0.565618	0.55751	0.565131	0.553883	0.549516	0.513527	0.480837	0.45206	0.454823	0.469894	0.517111	0.571173	0.66916	0.717553	0.816726	0.873354	0.872241	0.843459	0.832458	0.83787	0.819419	0.825084	0.742475	0.826726	0.804771
																									1.35866	1.34864	1.33876	1.32902	1.31943	1.13174	1.25266	1.43374	1.67602	1.6908	1.70585	1.50709	1.46908	1.43294	1.39854	1.36575	1.33446	1.30458	1.276	1.24865	1.22245	1.2087	1.19525	1.17186	1.14936
0.551083	0.539446	0.448726	0.439009	0.406887	0.434666	0.416042	0.441558	0.432457	0.414983	0.405864	0.410585	0.369313	0.355581	0.34165	0.355136	0.388273	0.397684	0.421617	0.48695	0.483223	0.50948	0.490446	0.435098	0.348011	0.310333	0.313157	0.28045	0.286559	0.293272	0.251144	0.257889	0.300953	0.315338	0.329952	0.304181	0.308948	0.334073	0.347274	0.416627	0.398873	0.40356	0.416089	0.421945	0.420687	0.434144	0.445761	0.459302	0.467973	0.469593
0.673086	0.658812	0.659895	0.685209	0.736536	0.705117	0.70298	0.711587	0.694737	0.740744	0.756192	0.736766	0.751781	0.760133	0.834988	0.789988	0.851661	0.88624	0.904316	0.93018	1.00982	0.992056	0.956953	0.8739	0.907167	0.860232	0.932973	0.865231	0.848917	0.833208	0.794003	0.796875	0.757398	0.745272	0.752215	0.755435	0.758682	0.761958	0.765262	0.789009	0.754326	0.751266	0.74823	0.745219	0.742232	0.739268	0.826101	0.831251	0.836465	0.721599
0.55787	0.529876	0.483821	0.469961	0.471817	0.468827	0.457698	0.471758	0.455197	0.460584	0.463474	0.465093	0.457525	0.481394	0.47728	0.478552	0.469272	0.427095	0.414052	0.422946	0.422802	0.417505	0.437457	0.459411	0.453443	0.472895	0.470791	0.471109	0.506831	0.469934	0.472087	0.507947	0.508703	0.523146	0.585658	0.520907	0.518383	0.662969	0.664676	0.79516	0.787933	0.758879	0.731244	0.705552	0.696585	0.687843	0.731337	0.723821	0.716458	0.709244
0.523385	0.52054	0.529959	0.541974	0.554547	0.567718	0.575162	0.572147	0.569164	0.566211	0.56329	0.560398	0.543768	0.528097	0.562493	0.54507	0.528693	0.529692	0.530694	0.5317	0.536395	0.541172	0.546036	0.525743	0.506903	0.542956	0.541628	0.544171	0.54619	0.574841	0.545545	0.563436	0.565269	0.536821	0.553146	0.543714	0.54886	0.554105	0.539071	0.527627	0.527165	0.509246	0.499948	0.515563	0.508714	0.495992	0.492825	0.503081	0.497339	0.514796
0.518682	0.526102	0.530488	0.575269	0.628307	0.692117	0.68454	0.838246	0.813935	0.843862	0.816428	0.790722	0.837926	0.891123	1.00603	0.848393	0.733467	1.00006	0.966354	0.989142	0.975653	0.739519	0.733442	0.727463	0.721581	0.715794	0.921718	1.02597	1.15682	1.32591	1.55291	1.06322	0.808323	1.42103	1.25926	1.19716	1.15875	1.20394	0.824122	0.62648	0.505299	0.4234	0.364346	0.476035	0.686468	0.715389	0.746855	0.781216	0.818892	0.899345
0.539983	0.568712	0.55153	0.486968	0.564599	0.536813	0.522987	0.55402	0.537577	0.50477	0.53696	0.562229	0.587427	0.576171	0.580174	0.616913	0.648855	0.650427	0.640528	0.630924	0.636029	0.606744	0.580036	0.578419	0.581887	0.566682	0.578331	0.590468	0.605964	0.622296	0.61974	0.613768	0.603451	0.617528	0.600794	0.614704	0.615675	0.597798	0.60197	0.604333	0.621113	0.669177	0.64462	0.656184	0.679775	0.66	0.715352	0.696364	0.684114	0.725507
																																															0.785857	0.748043	0.713701
1.67537	1.74468	1.47062	1.31656	1.58752	0.984016	0.901998	1.14834	1.22484	1.18435	0.99198	0.85337	0.816989	0.804936	0.810816	0.766617	0.688424	0.616024	0.585144	0.54428	0.552627	0.524087	0.524376	0.489074	0.509682	0.563671	0.572382	0.576005	0.579675	0.66765	0.60831	0.558657	0.516498	0.480256	0.448766	0.421152	0.423065	0.424433	0.425809	0.433963	0.442434	0.451243	0.46041	0.469957	0.479909	0.490291	0.501132	0.512463	0.534264	0.558003
1.01099	1.43156	1.60864	1.78308	1.99996	2.62014	1.9983	2.15983	3.13672	3.76307	4.6178	3.26583	5.09921	4.22958	3.65799	4.54406	3.52441	7.13017	2.2587	4.44078	4.99623	5.7105	6.66305	7.99701	9.99881	8.57222	4.5181	5.44604	5.04049	4.69116	4.38711	4.12007	3.88368	3.67294	8.26959	6.41301	6.75654	7.13897	7.56728	8.05027	11.3078	18.9933	10.1677	6.94197	5.27004	4.24714	3.55678	5.23195	9.88992	5.35806
2.51228	4.43808	2.58987	2.92959	2.99047	3.05393	1.4771	1.27508	1.19746	1.15172	1.10933	1.1537	1.21998	1.29434	1.57558	2.01542	2.10096	1.94237	2.11393	2.05239	1.9256	2.47839	2.224	2.25565	2.28821	2.00506	2.23837	2.21531	2.19934	5.01581	2.64031	2.33808	2.43728	2.64292	2.88646	2.74501	2.61678	2.64053	2.66472	2.68936	7.18587	2.98594	3.65478	3.60399	3.5546	3.50654	3.45976	3.53665	3.61704	3.70117
	0.754005	0.824463	1.12912	0.785326	0.602023	0.373614	0.270852	0.212425	0.239902	0.264062	0.277697	0.279253	0.280827	0.282419	0.284029	0.285658	0.333793	0.329115	0.324566	0.320141	0.357728	0.405316	0.438696	0.50387	0.61164	0.778055	0.908059	0.862916	0.822048	0.810093	0.72467	0.655543	0.716264	0.789381	0.971898	1.01432	0.901023	0.939541	0.940896	0.942255	0.943618	0.944985	0.946355	0.859163	0.786682	0.659834	0.596958	0.624185	0.662879
	0.800464	0.842341	0.885251	0.920115	1.00633	1.03089	1.03975	1.07599	1.19497	0.980744	0.979754	0.910591	0.929018	0.90111	0.956369	1.06255	1.10863	1.15888	1.21391	1.27442	1.21301	1.15648	1.07168	1.03845	1.07721	1.07952	1.05615	1.00644	0.978821	0.979015	1.01022	1.05688	1.11466	1.06595	0.985165	0.911768	0.887096	0.833511	0.85209	0.846727	0.78067	0.786089	0.748222	0.73443	0.723202	0.748589	0.756542	0.757405	0.762247
		0.594727	0.663737	0.677447	0.684673	0.671763	0.662563	0.648713	0.598574	0.600537	0.584217	0.50216	0.524236	0.540711	0.517656	0.58397	0.569069	0.592588	0.602959	0.554008	0.536753	0.510362	0.488278	0.468026	0.445553	0.415378	0.405715	0.420932	0.411931	0.403307	0.408351	0.404874	0.393682	0.383091	0.392342	0.40205	0.413715	0.426077	0.4392	0.441472	0.443767	0.461228	0.457742	0.454309	0.450926	0.447593	0.448664	0.449739	0.45082
			0.428154	0.399192	0.376491	0.43218	0.467395	0.57968	0.689515	0.748828	0.765637	0.794454	0.840718	0.879936	0.975284	0.977827	0.985061	0.991646	0.988696	0.996466	0.884297	0.847484	0.82709	0.818004	0.791941	0.864964	0.986595	0.981126	1.03706	1.0574	1.03007	0.991733	0.994304	0.93476	0.873159	0.890769	0.786238	0.866091	0.811695	0.776428	0.800464	0.775288	0.800114	0.739467	0.821111	0.844212	0.733275	0.7675	0.720347
			1.29704	1.4337	2.17534	2.92743	3.09303	3.87698	3.0635	4.77587	5.15595	4.29336	4.79042	5.41766	5.28778	5.43938	5.86001	5.57069	5.28631	4.98537	5.02947	4.65597	4.73958	4.92768	5.23395	4.55703	4.72082	4.17563	4.05202	3.93551	3.76848	3.61505	3.47362	3.37523	3.64197	3.70794	3.53577	3.90275	3.77141	3.63426	3.76686	3.54921	3.61602	3.60456	3.61121	3.71436	3.5597	3.58052	3.82958
			0.346213	0.33117	0.31738	0.304693	0.306963	0.309268	0.279596	0.270025	0.276184	0.28263	0.289384	0.288113	0.286852	0.288879	0.271825	0.267539	0.263387	0.234141	0.21074	0.223015	0.216469	0.232481	0.263571	0.271127	0.266288	0.291521	0.315034	0.310277	0.321933	0.320339	0.321384	0.344875	0.337175	0.386873	0.388755	0.368894	0.35655	0.412029	0.368692	0.382119	0.387728	0.350864	0.403428	0.398438	0.400287	0.375719	0.458529
			0.568175	0.669458	0.592624	0.524334	0.685501	0.707524	0.770177	0.806179	0.713235	0.716501	0.719797	0.592716	0.613279	0.699545	0.527951	0.671648	0.563788	0.573439	0.601727	0.578316	0.590964	0.60846	0.636456	0.649498	0.628403	0.631858	0.549127	0.588726	0.673118	0.659763	0.626931	0.673519	0.697316	0.749296	0.727645	0.734375	0.77128	0.783864	0.766083	0.762024	0.773112	0.766484	0.793013	0.793725	0.779801	0.723352	0.722062
						0.510881	0.524835	0.526416	0.592118	0.61257	0.617367	0.622239	0.567652	0.671036	0.693382	0.691802	0.67587	0.642436	0.598699	0.56925	0.504948	0.589509	0.675695	0.807322	0.766433	0.738144	0.711869	0.6874	0.687609	0.706116	0.740492	0.745719	0.668012	0.697248	0.683162	0.726285	0.711359	0.697035	0.677984	0.657504	0.638225	0.636172	0.628762	0.676786	0.60937	0.669814	0.651917	0.646963	0.657903
																															1.03434	1.04579	1.0575	1.0189	0.983014	0.941201	0.914362	0.889011	0.948251	0.94489	0.944611	0.944332	0.969789	0.996656	1.03985	1.08696	1.0372	1.06613	1.09672
							0.909746	1.20854	0.904346	1.0918	1.37727	1.8649	1.14466	1.21837	1.13884	0.919457	0.770944	0.663736	0.656852	0.65011	0.643505	0.637033	0.598082	0.56362	0.532914	0.536805	0.540754	0.539992	0.545901	0.502063	0.498658	0.4953	0.491986	0.488717	0.485491	0.518052	0.555294	0.576793	0.600023	0.630568	0.648455	0.667387	0.687457	0.676195	0.723073	0.680957	0.721882	0.732008	0.756754
										0.589708	0.486724	0.4549	0.415707	0.359661	0.450096	0.601285	0.635726	0.677648	0.690482	0.710793	0.671638	0.58462	0.522604	0.471633	0.443327	0.439942	0.443395	0.434273	0.352375	0.367244	0.444444	0.559557	0.645962	0.79115	0.838042	0.954408	0.969003	0.961488	1.03301	1.13844	1.18436	1.10727	1.09127	1.20255	1.07084	1.00087	0.951867	0.926883	0.87283

																		0.649842	0.700644	0.719891	0.723457	0.710843	0.702294	0.670397	0.638083	0.636089	0.626538	0.61727	0.604927	0.593068	0.631532	0.630459	0.635141	0.628186	0.621383	0.614725	0.608208	0.604761	0.601353	0.597983	0.598203	0.585025	0.572414	0.586124	0.600508	0.581582	0.586278	0.593672	0.603342
																										0.798514	0.850281	0.861468	0.945979	0.913583	0.883333	0.961031	0.90935	0.927295	0.959638	0.848483	0.940939	0.946829	1.04062	1.12413	1.06142	1.00533	0.954869	0.909233	0.867761	0.829907	1.46329	1.59213	1.44234
																																											1.33672	1.23952	1.3931	1.36216	1.19827	1.21635	1.21745
																																	1.83981	1.50727	5.13845	3.61043	2.78288	2.26396	1.90815	1.64899	2.58378	2.89547	3.29267	3.81617	4.53761	5.59541	7.29632	10.4829	11.3089
																																								0.712781	0.657662	0.650011	0.76728	0.936175	0.911257	0.88763	0.900025	0.983308	0.918463
																																															0.943373	0.951167	0.872758
2nd Tx dose: 100ng INS
1.22883	1.21412	1.2397	1.29839	1.08651	0.988385	0.884267	0.784741	0.684173	0.613109	0.569206	0.565257	0.563068	0.576697	0.627888	0.7728	1.06437	1.2991	1.47636	1.45316	1.42064	1.3893	1.34084	1.27918	1.25875	1.20142	1.18497	1.18694	1.24331	1.32678	1.30808	1.20445	1.16492	1.15635	1.16823	1.16603	1.13985	1.14683	1.17538	1.12594	1.07479	1.02344	1.00666	0.966514	0.97085	0.960023	0.928246	0.92918	0.980946	1.00438
1.08001	1.0754	1.01183	1.0433	1.03457	1.02468	1.02242	0.93334	0.983924	0.877686	0.926628	0.904717	0.887369	0.926854	0.89447	0.921407	0.88168	0.9152	0.946778	0.955023	0.971946	0.990627	0.957227	0.909347	0.979935	0.971276	0.893108	0.931565	0.970277	0.936278	0.944073	0.938761	0.933508	0.914713	0.891347	0.906454	0.922083	0.972806	0.881768	0.881256	0.883951	0.89947	0.892334	0.925001	0.931603	0.872424	0.854394	0.827418	0.805719	0.81665
0.586164	0.557431	0.511789	0.566585	0.848434	0.582569	0.606039	0.641822	0.682096	0.569195	0.67307	0.68234	0.667724	0.589006	0.534153	0.52064	0.607873	0.585939	0.612545	0.568848	0.556617	0.547268	0.566739	0.549953	0.580215	0.574703	0.588215	0.588479	0.594407	0.63411	0.660516	0.626153	0.595189	0.594143	0.577025	0.652073	0.627518	0.59022	0.591154	0.674478	0.670486	0.649068	0.636052	0.537927	0.745408	1.07018	0.874213	0.880379	1.03727	1.15192
0.218853	0.218138	0.217282	0.228124	0.240104	0.253412	0.275368	0.322381	0.354694	0.381383	0.412415	0.490056	0.415007	0.386269	0.46161	0.486425	0.545893	0.504957	0.549274	0.4857	0.469009	0.46495	0.537909	0.443759	0.438668	0.429771	0.437716	0.441187	0.435255	0.443402	0.429192	0.439394	0.431077	0.420931	0.421292	0.417622	0.405724	0.388262	0.375432	0.409544	0.395233	0.41812	0.416323	0.444982	0.405218	0.420842	0.43772	0.435946	0.407913	0.416326
0.423949	0.431383	0.401778	0.499128	0.56676	0.462847	0.493999	0.469433	0.515922	0.548558	0.49309	0.513185	0.518516	0.526555	0.454902	0.543495	0.528954	0.507903	0.562695	0.553108	0.613829	0.50751	0.580224	0.541752	0.601457	0.561299	0.586485	0.59591	0.605005	0.641223	0.656678	0.631343	0.636743	0.674383	0.710627	0.708409	0.781904	0.734679	0.714269	0.761379	0.75731	0.804513	0.886911	0.875432	0.899879	0.826121	0.822896	0.873387	0.875722	0.946583
0.910314	0.889252	0.759989	0.774293	0.782801	0.848434	0.87528	0.959746	1.00204	1.07776	1.05463	1.1648	1.13621	1.14227	1.14905	1.26823	1.38081	1.38657	1.27227	1.10136	1.19546	1.0718	0.983862	0.941078	0.928432	0.853104	0.887598	0.861304	0.884363	0.942353	0.945025	0.891489	0.861265	0.818861	0.852487	0.819176	0.842719	0.87086	0.843025	0.826698	0.779155	0.792879	0.7854	0.769429	0.772426	0.781434	0.761868	0.786915	0.752953	0.771487
1.25039	1.1761	1.16733	1.11717	0.942269	0.858166	0.778841	0.698927	0.658285	0.643212	0.557598	0.55902	0.560449	0.559726	0.541628	0.640509	0.72319	0.800712	0.810213	0.791467	0.771698	0.748077	0.701893	0.696037	0.714364	0.690508	0.646264	0.621259	0.576489	0.554771	0.566903	0.579577	0.591449	0.569266	0.557675	0.568293	0.579323	0.59079	0.60272	0.615142	0.63374	0.645738	0.622321	0.600543	0.571583	0.545287	0.527214	0.523604	0.509097	0.563435
0.411339	0.456939	0.427803	0.452584	0.478941	0.458973	0.50844	0.650003	0.670396	0.594817	0.597146	0.637907	0.615292	0.638275	0.665837	0.758546	0.837994	0.752751	0.678082	0.583919	0.575141	0.592577	0.595447	0.60047	0.632328	0.715634	0.729406	0.77463	0.742989	0.816075	0.879234	0.818826	0.83185	0.781886	0.866648	0.933043	0.903548	0.890123	0.824075	0.870298	0.877093	0.872371	0.981031	0.935546	0.969908	0.835494	0.905083	0.902095	0.879932	0.923263
0.501748	0.440124	0.484753	0.447211	0.50796	0.587807	0.574719	0.574652	0.54851	0.537994	0.528309	0.389873	0.308924	0.287801	0.295671	0.336581	0.347039	0.44473	0.618967	0.64259	0.672909	0.686297	0.776165	0.817299	0.836512	0.822608	0.812829	0.769113	0.772175	0.778373	0.784672	0.757401	0.72273	0.767873	0.735373	0.752523	0.770493	0.730303	0.744889	0.715923	0.702961	0.728925	0.68484	0.662288	0.640198	0.675052	0.701461	0.719458	0.738403	0.740019
0.693198	0.678359	0.766623	0.735066	0.76342	0.777524	0.806745	0.790671	0.790653	0.693886	0.73239	0.696988	0.71541	0.68143	0.686993	0.76863	0.770429	0.919963	0.869759	0.901258	0.902595	0.875496	0.806757	0.814532	0.840895	0.901189	0.962335	0.902314	0.901186	0.950654	0.997525	1.01607	0.982425	0.909074	0.850789	0.847126	0.842121	0.81035	0.793954	0.769268	0.747309	0.728621	0.729756	0.730894	0.732036	0.722296	0.712811	0.898716	0.750435	0.766606
0.668232	0.707349	0.700431	0.797311	0.824711	0.854061	0.827778	0.92716	0.882545	0.836944	0.761091	0.769314	0.817347	0.871778	0.953629	1.19954	1.40994	1.56708	1.80644	1.75253	1.70174	1.65381	1.6085	1.56562	1.52496	1.6904	1.89612	2.15883	2.50607	2.50682	2.50757	2.50833	2.50908	2.50984	2.51059	2.5241	2.57969	2.68053	2.6138	2.80788	3.11583	3.20089	3.00975	3.40361	2.6111	2.85082	2.7449	2.49181	3.01626	3.01269
0.439515	0.406451	0.436769	0.38435	0.33863	0.374563	0.419026	0.420073	0.308096	0.243253	0.276496	0.272482	0.28466	0.256558	0.233507	0.298965	0.415417	0.471133	0.400446	0.348204	0.318883	0.322575	0.326353	0.281546	0.311478	0.291845	0.286926	0.305783	0.327294	0.35206	0.383607	0.421363	0.538623	0.5243	0.51072	0.497825	0.489763	0.481958	0.474398	0.473188	0.471985	0.470788	0.472914	0.466411	0.467181	0.464136	0.469414	0.500061	0.488457	0.504595
0.183427	0.195061	0.208271	0.188705	0.204741	0.223756	0.232203	0.219501	0.248495	0.286314	0.271855	0.249593	0.281697	0.300853	0.315859	0.339138	0.366122	0.456998	0.452834	0.448746	0.543751	0.565527	0.58912	0.614768	0.64275	0.673401	0.686983	0.578854	0.511585	0.496525	0.482326	0.468917	0.456233	0.444217	0.432818	0.416033	0.411355	0.459426	0.415378	0.396093	0.372906	0.417348	0.374684	0.449601	0.455927	0.459644	0.47528	0.435795	0.411995	0.417216
																																		0.830722	0.853148	0.876819	0.90184	0.928332	0.956426	0.986275	0.970134	0.893643	0.76288	0.805031	0.666338	0.815296	0.716947	0.802259	0.674531
0.586746	0.629504	0.637714	0.592871	0.576314	0.596696	0.505587	0.528659	0.543349	0.528824	0.56157	0.51674	0.489719	0.458332	0.479877	0.537756	0.537119	0.58187	0.583994	0.586133	0.516263	0.522573	0.529039	0.535667	0.542463	0.509167	0.537475	0.512815	0.490319	0.507109	0.544539	0.494256	0.468841	0.466622	0.462644	0.494668	0.478957	0.548837	0.532809	0.541777	0.523109	0.520713	0.582561	0.584418	0.57448	0.562531	0.506071	0.528162	0.424218	0.393403
0.477889	0.48437	0.491029	0.497874	0.504913	0.512153	0.519604	0.527275	0.580171	0.505537	0.510748	0.516066	0.400075	0.326656	0.365363	0.414477	0.478845	0.550942	0.577852	0.608306	0.698955	0.56747	0.508431	0.63287	0.51573	0.435181	0.430805	0.53388	0.564129	0.592147	0.453445	0.511242	0.486535	0.50122	0.539206	0.520432	0.514697	0.525234	0.48089	0.487427	0.540537	0.547138	0.536052	0.529249	0.46982	0.526629	0.598541	0.603592	0.647967	0.586803
0.829575	0.931265	0.821169	0.845662	0.861078	0.886826	0.794192	0.836083	0.797613	0.762527	0.759429	0.765612	0.769449	0.773325	0.77724	0.781195	0.78519	0.757137	0.755229	0.732607	0.713024	0.675204	0.677165	0.669447	0.67431	0.679244	0.684251	0.672229	0.745848	0.837576	0.858958	0.853131	0.880627	0.875436	0.856202	0.947146	0.916676	0.888106	0.896864	0.898322	0.87851	0.90852	1.02206	0.975176	0.991237	1.00784	1.025	1.06046	0.92274	1.16385
0.457695	0.446672	0.445604	0.463442	0.490349	0.508878	0.547275	0.60282	0.646683	0.712723	0.768194	0.800519	0.854152	0.901679	0.951323	0.993622	1.04019	1.03329	0.994438	0.920763	0.824333	0.746186	0.666906	0.594362	0.565221	0.563207	0.570475	0.577934	0.580844	0.583784	0.586753	0.577359	0.585257	0.609034	0.638864	0.672424	0.718114	0.79875	0.811606	0.837247	0.944918	1.0497	1.13514	1.10867	1.07099	1.03447	1.00037	0.981891	0.938665	0.899084
1.01417	0.954616	0.883023	0.824141	0.799227	0.874631	0.941757	0.982092	1.0374	1.02643	1.04595	1.04282	0.894856	0.991064	0.96085	1.03052	1.14743	1.27392	1.32512	1.3169	1.21199	1.24936	1.16215	1.02861	0.966221	0.948245	0.896261	0.895282	0.954071	0.929059	0.887262	0.879847	0.859278	0.839649	0.875567	0.861311	0.859248	0.896207	0.925463	0.869986	0.820866	0.782868	0.790959	0.77391	0.802973	0.843422	0.892283	0.871306	0.926015	0.892112
0.486479	0.459885	0.438274	0.436126	0.466893	0.452758	0.461838	0.437199	0.439274	0.411413	0.405387	0.416301	0.410567	0.430219	0.43002	0.44477	0.549244	0.578797	0.582831	0.557581	0.633999	0.55685	0.786935	0.724446	0.671151	0.625161	0.808682	1.14473	1.25613	1.39156	1.10364	1.17288	1.11188	1.05989	1.02416	1.07936	1.07526	1.06692	0.988525	0.920864	0.814265	0.824444	0.968661	1.0202	1.06348	1.07837	1.08655	1.04174	1.04151	1.03736
0.590867	0.619672	0.618721	0.66492	0.659065	0.640134	0.641095	0.64206	0.62189	0.642756	0.654997	0.637815	0.610082	0.594351	0.598384	0.651984	0.645701	0.638218	0.61018	0.58885	0.561312	0.547694	0.523885	0.533987	0.550876	0.542556	0.547891	0.554029	0.558507	0.544582	0.552864	0.519301	0.528526	0.526133	0.505254	0.514766	0.518584	0.506614	0.494431	0.484217	0.470939	0.483733	0.480503	0.477225	0.485162	0.464949	0.46986	0.445156	0.457574	0.474134
0.915109	0.894628	0.753751	0.816264	0.890084	0.978583	1.08662	1.22148	1.33687	1.40946	1.39865	1.3765	1.16867	1.14624	1.15935	1.23693	1.36116	1.37953	1.39549	1.37691	1.21663	1.26744	1.27882	1.28059	1.11135	1.02326	1.03896	1.08743	1.13621	1.18964	1.24834	1.38568	1.54405	1.35725	1.47892	1.42611	1.37694	1.30486	1.23994	1.13875	0.976672	0.963443	0.950568	0.938032	0.925823	0.987358	1.05766	1.13873	1.25037	1.24926
							6.90502	8.39998	10.7211	10.2337	5.34927	4.26658	7.56306	4.95612	8.08536	3.39674	2.91334	4.71411	4.54321	4.38427	3.17831	4.98214	3.33057	2.50137	2.34216	3.74268	3.24115	2.85816	2.55611	3.02672	3.70973	5.68997	2.87966	3.67615	5.08168	4.67928	4.33592	3.0833	5.86851	5.65563	4.79919	4.16802	5.77446	5.47961	5.21342	4.19853	5.24345	5.60691	7.51417
0.342261	0.3195	0.317446	0.350586	0.340788	0.347929	0.343368	0.341609	0.342948	0.339391	0.332165	0.319268	0.317457	0.315274	0.324393	0.33706	0.362042	0.384989	0.385125	0.397	0.386018	0.365793	0.362516	0.355949	0.356226	0.333964	0.319893	0.329612	0.331961	0.325085	0.327737	0.355579	0.355502	0.374867	0.375552	0.427839	0.439643	0.431102	0.441672	0.436169	0.435824	0.424863	0.407185	0.431	0.467896	0.504044	0.528611	0.56745	0.600873	0.632512
0.412517	0.424637	0.448445	0.456295	0.460333	0.435669	0.452923	0.442139	0.481204	0.498973	0.505311	0.536599	0.554084	0.543208	0.592956	0.693849	0.830288	0.938416	1.01696	1.03044	1.01752	0.951366	0.912248	0.882744	0.85473	0.828439	0.803717	0.780428	0.729384	0.761484	0.765577	0.809824	0.782282	0.818252	0.808939	0.780487	0.762032	0.729387	0.699848	0.661846	0.680621	0.679772	0.625925	0.688888	0.76511	0.70478	0.775633	0.763242	0.75124	0.72305
0.67358	0.694372	0.775981	0.740277	0.786021	0.837791	0.823677	0.711768	0.650463	0.625862	0.615454	0.785909	0.783854	0.989871	1.07999	1.13427	1.18248	1.17159	1.1609	1.1504	1.16325	1.13951	1.08012	0.979058	0.915927	1.01823	0.93578	0.926721	0.863198	0.875443	0.883273	0.891245	0.899362	0.837167	0.816292	0.787411	0.794522	0.802384	0.835813	0.838702	0.846276	0.825156	0.858669	0.872765	0.887332	0.901475	0.91459	0.926787	0.915141	0.951193
0.51223	0.597927	0.576943	0.569557	0.620136	0.562837	0.553959	0.564061	0.546908	0.581934	0.568627	0.604725	0.618549	0.627767	0.649196	0.726807	0.75944	0.73694	0.710721	0.666889	0.673883	0.667697	0.661624	0.696991	0.588769	0.559431	0.552338	0.53682	0.514411	0.539091	0.566259	0.596311	0.622499	0.616537	0.607702	0.854918	0.62689	0.49489	0.493968	0.424277	0.433059	0.417215	0.437647	0.506361	0.487252	0.410826	0.514295	0.687428	0.549281	0.457368
1.43407	1.56201	1.91726	1.95287	1.98856	2.02557	2.10776	2.21514	1.73152	1.81433	2.12766	1.79324	2.48854	2.08893	4.38534	1.60181	0.97986	0.984274	1.50686	3.21245	3.37672	3.97476	3.83053	2.87017	2.29482	1.91162	1.63809	1.56971	1.50681	1.60192	1.69071	1.28963	1.20035	1.1091	1.48326	1.30499	1.16497	1.05208	1.08456	1.1191	0.901666	0.807204	0.75898	0.895554	0.94712	0.936543	0.868769	0.922834	0.929796	1.3173
0.538028	0.664884	0.685471	0.686041	0.686611	0.687182	0.633799	0.631569	0.650334	0.667181	0.75348	0.74878	0.744138	0.791199	0.859005	0.83273	0.811028	0.790429	0.821755	0.748908	0.776095	0.715796	0.741631	0.7694	0.791456	0.792371	0.780571	0.770769	0.758763	0.78179	0.733308	0.705418	0.743814	0.728826	0.765648	0.72525	0.69544	0.71095	0.686332	0.697125	0.66394	0.678733	0.664396	0.68498	0.658603	0.667462	0.676564	0.665437	0.666757	0.696209
																																												0.82608	0.768606	0.86952	0.804791	0.837262	0.872464
		1.03899	0.978108	0.97668	0.94572	0.923659	0.947807	0.976757	0.944256	0.952627	0.971199	0.980268	0.993416	1.02853	1.08315	1.10916	1.18237	1.21008	1.26271	1.11755	1.02589	0.977867	0.932743	0.959154	0.940556	0.954442	0.965376	1.01085	1.02222	0.990641	1.04524	0.995753	0.993113	0.97648	0.992387	1.0112	1.04031	1.10854	1.0226	1.0361	1.03807	0.972526	0.953294	0.909429	0.935353	0.954733	1.02254	1.10072	1.16322
		0.851561	0.765191	0.707223	0.655519	0.61086	0.584706	0.548501	0.562308	0.559802	0.529041	0.493147	0.501052	0.548993	0.604066	0.648457	0.66686	0.695394	0.707879	0.722327	0.722921	0.66627	0.693113	0.672412	0.642135	0.653935	0.64739	0.662887	0.680989	0.673413	0.676903	0.68344	0.679708	0.662869	0.654781	0.617486	0.632635	0.677291	0.721634	0.756914	0.759889	0.781135	0.758841	0.792323	0.787489	0.795485	0.863987	0.873775	0.84486
		0.351722	0.338014	0.363994	0.350943	0.363447	0.373904	0.363577	0.363266	0.381648	0.3813	0.388116	0.384168	0.405113	0.48842	0.507627	0.598051	0.55776	0.578691	0.601255	0.625649	0.652107	0.680901	0.691021	0.67408	0.711168	0.729119	0.756885	0.740013	0.740871	0.723618	0.760622	0.792238	0.783319	0.715526	0.714357	0.697938	0.700924	0.692289	0.676978	0.656164	0.670928	0.703297	0.659191	0.694793	0.705849	0.684118	0.682142	0.69201
																																																2.07792	1.91801
			0.685388	0.66737	0.686438	0.623005	0.656137	0.647629	0.700137	0.779964	0.834785	0.921687	0.910051	0.973789	0.986972	1.05221	1.05015	1.12941	1.09277	1.02166	1.10417	1.05968	1.05386	1.18819	1.23564	1.2849	1.32596	1.34313	1.45562	1.38806	1.36803	1.41028	1.45523	1.43549	1.36875	1.36447	1.36021	1.41209	1.42575	1.52877	1.44783	1.18477	1.00261	0.943552	1.16266	1.51431	1.55802	1.60433	1.65348
			0.539884	0.561925	0.547764	0.566865	0.584261	0.587869	0.600118	0.595089	0.622513	0.659301	0.716692	0.713593	0.768612	0.863087	0.805753	0.807692	0.776105	0.739498	0.797734	0.800562	0.809521	0.777	0.805737	0.770579	0.816914	1.16485	0.853987	0.640936	0.535878	0.46041	0.403575	0.378436	0.356245	0.336513	0.318851	0.302952	0.342161	0.411843	0.494907	0.519251	0.516004	0.457759	0.457335	0.40636	0.423994	0.368788	0.347149
			1.73442	1.73274	1.54373	1.3374	0.975956	1.03401	1.55075	1.58255	1.61511	2.05479	1.94032	1.62391	1.39622	1.46519	1.37231	1.45967	1.55892	1.67265	1.76215	1.66779	1.58302	1.50645	1.28306	1.50835	1.3094	1.20139	1.10984	1.18901	1.09641	0.971397	1.06867	1.18759	1.33629	1.41993	1.4822	1.55019	0.959572	0.69484	0.551756	0.457538	0.416023	0.375112	0.341645	0.295284	0.251844	0.256957	0.262282
					0.772615	1.18232	1.14439	1.3123	1.53796	1.49012	1.44517	1.40285	1.36294	1.32523	1.43688	1.34342	1.26137	1.25037	1.23956	1.23161	1.28072	1.33391	1.4109	1.40807	1.40525	1.40245	1.39965	1.39686	1.39409	1.39132	1.77648	1.5163	1.36155	1.23547	1.16887	1.19403	1.05379	0.857041	0.904133	0.836686	0.835463	0.862831	0.962499	1.04885	0.830163	0.93954	0.860796	1.06332	1.06042
						0.594221	0.580121	0.578936	0.558254	0.587525	0.614217	0.662429	0.718854	0.713859	0.747693	0.740518	0.733479	0.815753	0.686582	0.702342	0.723314	0.699748	0.677669	0.648116	0.59176	0.512412	0.527549	0.541654	0.58065	0.609202	0.693869	0.760297	0.760081	0.729817	0.71284	0.693889	0.638542	0.643091	0.649103	0.689675	0.686345	0.618251	0.697436	0.621073	0.645805	0.566262	0.571389	0.520629	0.620304
							7.57094	4.89476	6.18756	6.76234	7.11392	10.538	8.14477	8.8775	9.01127	9.14912	9.29126	9.43789	9.58921	9.74547	9.90691	11.4036	22.8454	14.3983	10.5116	13.6099	14.8846	16.4228	24.3615	21.1046	16.7006	20.6297	19.2541	14.7595	21.5187	18.7266	17.3293	16.126	10.5073	12.9036	9.71271	15.3805	10.9271	9.38768	8.22844	7.4854	6.86545	6.34033	8.16605
											0.542747	0.456766	0.523328	0.428906	0.446107	0.535544	0.614186	0.599484	0.619959	0.609392	0.599179	0.589303	0.54251	0.502602	0.504437	0.507398	0.497159	0.501159	0.464724	0.480599	0.508451	0.53973	0.575109	0.542488	0.51337	0.487218	0.463601	0.460194	0.456835	0.453526	0.450264	0.447049	0.443879	0.417083	0.393339	0.433817	0.483582	0.587575	0.497084
												0.526797	0.552613	0.561806	0.623488	0.585017	0.591271	0.597661	0.679272	0.667235	0.667905	0.629276	0.596309	0.588455	0.56554	0.667766	0.631886	0.599665	0.59331	0.545929	0.569913	0.54689	0.48127	0.378847	0.359116	0.40429	0.462465	0.540195	0.649335	0.52461	0.547128	0.571666	0.564232	0.556988	0.549928	0.501462	0.51953	0.584674	0.591472
												0.700568	0.85165	0.751861	1.15216	1.04751	1.27988	1.42735	1.61322	1.44144	1.30272	1.22242	1.15144	1.08825	1.23914	1.43859	1.74052	1.66834	1.2337	1.29431	1.36119	1.43536	1.51808	1.48937	1.46172	1.43688	1.41287	1.26016	1.61201	1.84759	1.39946	1.4583	1.81546	1.54914	1.28843	1.29334	1.29828	1.48989	1.50337
													0.647011	0.514037	0.567163	0.711332	0.735435	0.761228	0.788897	0.803347	0.818337	0.833896	0.850059	0.866861	0.854403	0.820609	0.896323	0.883533	0.804716	0.879643	0.969954	0.953776	0.826064	0.802466	0.780179	1.07404	0.970846	1.00211	1.03546	1.08362	1.06585	1.04867	1.28848	1.65204	1.15297	0.885475	1.69487	1.92617	1.90108
													0.190161	0.219447	0.259394	0.317123	0.407902	0.5715	0.9542	0.841802	0.720061	0.688349	0.618957	0.552645	0.550119	0.547617	0.545137	0.502214	0.495582	0.520353	0.485572	0.516484	0.535335	0.602264	0.620514	0.624935	0.70325	0.71223	0.723372	0.713796	0.734195	0.716544	0.671619	0.686043	0.716151	0.749021	0.747281	0.774308	0.725613
													1.06408	0.980828	1.14138	1.22997	1.31152	1.2566	1.22707	1.23331	1.18841	1.11013	1.18638	1.20608	1.42434	1.43189	1.41872	1.46824	1.48613	1.50446	1.53762	1.52108	1.47829	1.46204	1.5329	1.40556	1.3846	1.34285	1.33183	1.29323	1.25994	1.2459	1.21794	1.21032	1.11541	1.10611	1.07359	1.10219	1.0652
																			2.73723	3.90913	3.91556	3.24289	3.9802	2.87999	3.4397	2.32485	2.12236	2.60356	2.52979	2.46009	2.14465	1.90091	2.22035	2.66884	3.34437	2.7271	2.30219	1.96699	2.38193	1.21945	2.46533	1.53358	1.42372	1.47082	1.52629	1.75494	2.06417	1.4022	1.34943
																										6.19108	5.59195	15.9414	6.58654	7.56223	8.87727	8.66191	8.45676	7.17685	9.48308	13.9733	10.6914	12.8394	9.39578	4.69813	5.47237	5.33018	5.57754	6.54863	6.79961	9.34181	7.65212	8.60527	8.12005
																														0.540372	0.514835	0.463516	0.492755	0.466222	0.502494	0.453496	0.456014	0.444016	0.4512	0.442771	0.443228	0.445062	0.474982	0.502858	0.531453	0.563496	0.599651	0.644525	0.640012
																																						0.343341	0.399237	0.415576	0.490755	0.537442	0.535132	0.524266	0.461237	0.449956	0.443917	0.44124	0.403592
																																										0.284189	0.2548	0.250327	0.229614	0.23859	0.224463	0.244089	0.271127
																																												0.770342	0.86464	0.761588	1.06008	0.929587	0.996674
																																															1.28113	1.21582	1.24549
0.725985	0.688509	0.707198	0.719029	0.712253	0.717087	0.759444	0.785643	0.818189	0.885627	0.909108	0.88445	0.862468	0.815804	0.777646	0.758267	0.754771	0.789667	0.796369	0.855807	0.906586	0.895433	0.896655	0.850016	0.840137	0.86036	0.888632	0.903012	0.867813	0.846886	0.834843	0.799853	0.760491	0.743654	0.788519	0.779698	0.874114	0.894193	0.957105	0.976355	0.986986	0.96211	0.929655	0.898378	0.825657	0.763827	0.710612	0.732613	0.768403	0.810459
0.406417	0.467749	0.458752	0.460207	0.438125	0.444778	0.4303	0.43067	0.463446	0.451008	0.486517	0.456346	0.463073	0.429042	0.446914	0.452862	0.470046	0.509982	0.513365	0.534483	0.516317	0.499679	0.525682	0.55073	0.544461	0.607736	0.588752	0.542188	0.515239	0.56997	0.547859	0.572915	0.626866	0.556398	0.582715	0.598311	0.540424	0.53818	0.468412	0.472881	0.470285	0.439533	0.450626	0.474762	0.463104	0.521519	0.519082	0.485662	0.506847	0.511209
0.328596	0.317506	0.315228	0.30886	0.319452	0.322759	0.314873	0.295837	0.327103	0.282851	0.249146	0.222618	0.240878	0.262403	0.288151	0.319502	0.439632	0.704526	0.818664	0.918171	0.979929	1.03895	1.12826	1.15762	1.14906	1.17623	1.20945	1.07565	1.1868	1.05051	1.0025	0.971496	0.90301	0.828014	0.880663	0.832804	0.798146	0.792839	0.818336	0.772795	0.758102	0.78077	0.69848	0.660661	0.568423	0.535974	0.466021	0.455278	0.433492	0.417647
0.360341	0.299352	0.346756	0.391619	0.422666	0.45083	0.451169	0.442023	0.395571	0.364041	0.324231	0.381294	0.462733	0.438053	0.531039	0.559514	0.470122	0.427162	0.397933	0.366859	0.350033	0.343505	0.359218	0.339894	0.325595	0.343106	0.311977	0.336486	0.328884	0.335729	0.34363	0.338949	0.320636	0.376641	0.386636	0.355648	0.389356	0.381329	0.347945	0.383187	0.417868	0.421828	0.379038	0.400493	0.403181	0.457713	0.410636	0.43786	0.448353	0.439629
1.21019	1.28239	1.24956	1.3274	1.27581	1.15426	1.25021	1.30839	1.2321	1.16375	1.2105	1.20552	1.40066	1.64345	1.71051	1.90568	1.88708	1.74738	1.59265	1.32985	1.33071	1.39492	1.02907	1.06822	1.13541	1.4463	1.08136	1.14596	1.19474	1.10678	1.59674	1.16391	1.10549	1.19245	1.05702	1.14027	1.14029	1.12576	1.1116	1.16208	1.18069	1.18056	1.00689	1.04873	1.24108	1.27424	1.20467	1.20266	1.27238	1.36519
0.811022	0.933221	0.946194	1.10066	1.06321	1.01182	1.03054	1.03743	0.990032	0.890063	0.829989	0.799008	0.771008	0.739652	0.817477	0.913604	0.994767	1.00505	1.01796	1.0312	0.995607	0.991932	1.00111	0.956048	0.943927	0.966828	0.908246	0.885091	0.89804	0.932485	0.921824	0.870687	0.931923	0.990305	0.99994	0.990514	1.03086	1.00398	0.974935	0.946914	0.906346	0.924591	0.903039	0.900314	0.879134	0.868374	0.880534	0.911597	0.866303	0.820666
0.781968	0.755155	0.728521	0.75285	0.767701	0.796567	0.764935	0.735718	0.758044	0.792057	0.788806	0.791253	0.770994	0.734074	0.736949	0.741337	0.892166	0.804339	0.83	0.749667	0.766585	0.705176	0.677871	0.674557	0.654653	0.668421	0.711555	0.714027	0.760475	0.763486	0.834847	0.88716	0.920713	0.992926	0.941689	0.978675	1.00277	1.05115	1.02496	0.989584	1.06444	1.18607	1.33302	0.606424	0.392488	0.290134	0.256558	0.229948	0.312166	0.485902
0.605223	0.67198	0.650796	0.62495	0.600818	0.635293	0.668992	0.648391	0.65344	0.642089	0.683132	0.695486	0.60487	0.578244	0.532578	0.498025	0.560036	0.576535	0.604272	0.626745	0.65213	0.621102	0.613294	0.65903	0.662734	0.631935	0.653203	0.667382	0.70398	0.678872	0.718293	0.748355	0.763438	0.802307	0.764707	0.727814	0.724252	0.772309	0.75437	0.7691	0.920628	0.616294	0.463179	0.371005	0.357089	0.353916	0.352111	0.343317	0.340653	0.40437
0.80495	0.799101	0.826481	0.826542	0.85728	0.855843	0.877579	0.880003	0.876638	0.855816	0.83984	0.826749	0.819503	0.829387	0.823871	0.821649	0.87872	0.903696	0.939606	0.954564	0.950779	0.947024	0.943298	0.946675	0.950077	0.93382	0.934277	0.952378	0.971196	0.954999	0.999796	1.00153	0.970548	0.970094	0.992439	0.991652	0.96581	0.959769	0.89142	0.870031	0.87226	0.87753	0.872407	0.874528	0.837523	0.882271	0.874063	0.860531	0.825933	0.815471
0.2251	0.225519	0.23737	0.229837	0.243533	0.258963	0.276193	0.246011	0.283337	0.290079	0.315579	0.290122	0.30433	0.294556	0.290054	0.296622	0.307649	0.298558	0.301687	0.288547	0.300044	0.312495	0.318106	0.343585	0.349459	0.362949	0.347707	0.360132	0.359421	0.358913	0.372886	0.379702	0.370235	0.380602	0.367589	0.397616	0.403157	0.390991	0.383507	0.370649	0.354508	0.351987	0.361067	0.340243	0.325216	0.308969	0.299602	0.287237	0.283487	0.276892
0.93602	0.848736	0.876079	0.824704	0.749736	0.734279	0.699474	0.737835	0.689901	0.692304	0.728936	0.722471	0.755972	0.804936	0.833669	0.852196	0.972845	0.961198	0.950221	0.934913	0.931477	0.9154	0.866358	0.84047	0.797992	0.812657	0.797595	0.816755	0.830151	0.847335	0.904668	0.959815	0.989283	1.0192	1.04634	1.08512	1.12727	1.06347	1.0569	1.05042	1.00799	0.976882	1.00354	0.990988	1.00209	1.04465	0.894708	0.930885	0.87265	0.918415
0.89794	0.959015	0.84953	0.839356	0.82136	0.845104	0.840082	0.90624	0.869498	0.845175	0.822549	0.775476	0.91253	0.725714	0.732265	0.738936	0.827235	0.860779	0.870744	0.818523	0.804993	0.835635	0.871432	0.894825	0.941367	0.981202	0.954478	1.00312	0.998046	0.974642	0.994556	1.03184	1.04612	1.06079	1.02208	0.995766	0.970776	1.12456	1.07403	1.06049	1.02055	1.03581	1.06094	1.0462	1.06645	1.05573	1.04841	1.01889	1.02788	0.927838
0.581682	0.552709	0.597699	0.624243	0.654407	0.663681	0.691988	0.653892	0.725388	0.739405	0.727542	0.754038	0.791745	0.777202	0.722092	0.723125	0.714106	0.74713	0.709115	0.670267	0.681638	0.666287	0.655514	0.616838	0.549762	0.556914	0.567461	0.562249	0.557132	0.550113	0.537758	0.53966	0.525523	0.55681	0.605453	0.631398	0.613214	0.571975	0.587026	0.591278	0.638869	0.676837	0.653981	0.58976	0.615456	0.576544	0.604721	0.617311	0.647644	0.622738
0.417076	0.403127	0.371639	0.355052	0.301502	0.301242	0.281134	0.289509	0.27773	0.290058	0.299349	0.306865	0.310354	0.316626	0.352076	0.396464	0.422292	0.45172	0.445132	0.483523	0.473887	0.419153	0.375754	0.340498	0.324753	0.347924	0.346043	0.347431	0.367091	0.365991	0.373851	0.396011	0.404755	0.413893	0.421179	0.421872	0.444222	0.449795	0.425274	0.412344	0.394266	0.384445	0.408091	0.397557	0.406952	0.394927	0.395893	0.397078	0.401305	0.353768
0.830376	0.761749	0.742106	0.714698	0.645499	0.632117	0.608145	0.601474	0.570879	0.58602	0.580085	0.620966	0.596899	0.609887	0.623452	0.732257	0.884218	0.955327	1.03951	1.03653	0.987846	0.886859	0.847317	0.815929	0.777747	0.679655	0.688611	0.606125	0.644265	0.687526	0.68575	0.72587	0.714086	0.794183	0.878569	0.866156	0.834551	0.814256	0.797542	0.732248	0.738317	0.697235	0.681377	0.698321	0.716129	0.73487	0.754618	0.775456	0.797478	0.820788
0.390058	0.387534	0.402454	0.399592	0.395486	0.38949	0.393037	0.392411	0.394595	0.394953	0.408303	0.404741	0.404218	0.395271	0.396192	0.433214	0.43499	0.411396	0.400087	0.385882	0.394832	0.383996	0.375932	0.371679	0.361665	0.358961	0.356623	0.346241	0.342811	0.353597	0.360735	0.380816	0.373843	0.37446	0.359228	0.345969	0.317369	0.292424	0.282784	0.268197	0.265167	0.26935	0.2701	0.288801	0.301694	0.291708	0.28261	0.277648	0.285838	0.305151
0.616539	0.605306	0.613349	0.572366	0.583252	0.576604	0.551245	0.559932	0.546469	0.562253	0.567857	0.573574	0.567825	0.56219	0.576948	0.594458	0.566216	0.56596	0.508965	0.512931	0.530439	0.551828	0.575015	0.600236	0.639229	0.651725	0.683321	0.695245	0.719643	0.726424	0.733404	0.734834	0.722364	0.716263	0.694682	0.687313	0.6766	0.675978	0.671641	0.675435	0.692378	0.707578	0.697819	0.716217	0.706866	0.70611	0.694181	0.689643	0.711715	0.673305
0.624265	0.625193	0.587744	0.568418	0.554735	0.550198	0.574619	0.557924	0.580031	0.573979	0.628558	0.631227	0.628839	0.646888	0.659514	0.693369	0.736741	0.77828	0.794145	0.829015	0.792306	0.798233	0.783315	0.767513	0.776295	0.815953	0.805244	0.763124	0.739469	0.775635	0.783957	0.790856	0.85198	0.904075	0.911301	0.937544	0.974841	1.02614	1.01238	1.02991	0.984145	0.961598	0.906285	0.893461	0.888552	0.896891	0.852678	0.852781	0.802926	0.759031
0.38565	0.3829	0.465907	0.403941	0.479881	0.590985	0.769035	0.794825	0.822405	0.851967	0.883734	0.917962	0.954948	0.995039	1.03864	1.08136	1.12775	1.17829	1.10248	1.08201	1.2213	1.07164	0.976948	0.990123	1.20501	1.02319	0.948087	1.04135	1.15497	0.98809	0.86335	0.975119	1.0355	0.849374	0.811306	0.839555	0.775368	0.746174	0.818455	0.745202	0.877079	0.912741	0.951427	0.74885	0.73919	0.729777	0.720601	0.711652	0.702923	0.749418
																																	1.30493	1.18921	1.09235	1.01008	0.939332	0.913182	0.929094	0.902814	0.890873	0.907142	1.02383	1.14716	1.23871	1.17243	1.02735	1.19249	1.24858
1.44378	1.55622	1.41645	1.22184	1.72734	1.70833	1.89935	2.13847	2.44648	3.1063	4.25348	3.95212	3.69063	2.9122	3.33286	3.68662	3.85337	3.41469	3.01197	3.33687	3.06145	2.70844	3.22292	2.33531	2.55203	2.02651	2.05575	2.2214	2.41569	2.19996	2.34522	2.06426	2.26919	2.11363	2.33036	2.45297	2.21977	2.63638	2.57502	2.60086	2.61254	2.22604	2.31376	2.18354	2.16143	2.32332	2.13701	1.90151	1.92915	1.82119
0.17153	0.171951	0.17082	0.178486	0.186873	0.196087	0.206256	0.217538	0.226096	0.227539	0.25801	0.304018	0.369997	0.472549	0.653751	1.06035	2.80471	1.2239	1.15807	1.09896	1.04559	0.997166	0.768092	0.624604	0.764469	0.949471	0.916407	0.686922	0.918858	0.977378	1.45168	2.40873	2.42145	1.51107	2.49927	2.64742	2.46088	2.44103	1.90934	1.31176	1.43206	1.11104	1.10424	1.19178	1.39825	0.917743	1.44372	0.911079	0.96428	0.891935
																																						2.96831	4.04944	6.36929	1.91436	0.924542	0.784088	0.633343	0.72667	1.11872	1.12819	0.873964	1.27043
1.23159	1.26652	1.02631	1.25949	1.29007	1.48073	1.23712	1.34074	1.06596	0.96186	1.24898	1.78045	1.257	1.49811	1.70147	1.85	1.57844	1.81007	1.37632	1.11027	1.07841	1.04833	1.04701	1.04569	1.04437	1.12979	1.23044	1.35078	1.4972	1.67923	1.91164	2.21873	1.77174	1.87968	2.21617	2.04984	1.91215	1.89514	1.66135	1.48053	1.61904	1.66113	1.64666	1.65473	1.49102	1.63972	1.74357	1.57199	1.54293	1.44581
				0.801869	0.801825	0.80178	0.801736	0.801691	0.801646	0.801602	0.801557	0.801513	0.801468	0.829812	0.817698	0.852446	0.871249	0.890901	0.911459	0.932989	0.955561	0.979252	0.917027	0.618487	0.517822	0.445339	0.390656	0.401627	0.413232	0.425528	0.438578	0.427138	0.556208	0.797057	0.478891	0.342266	0.355092	0.341923	0.34514	0.348417	0.351758	0.355163	0.358635	0.362175	0.365786	0.36947	0.409042	0.458108	0.52055
1.32113	1.25043	1.31393	1.25137	1.22364	1.20948	1.23673	1.19059	1.17968	1.1337	1.12739	1.14994	1.08094	1.16678	1.15904	1.17282	1.14302	1.18371	1.19632	1.17558	1.20807	1.14013	1.13385	1.03238	0.995794	0.960977	0.972986	0.978986	0.978031	1.02334	0.941575	0.950819	0.957405	0.893656	0.879122	0.878484	0.888579	0.921326	0.92896	0.98368	1.05086	0.983594	0.972721	0.962086	0.903703	1.01624	1.05095	1.04357	0.969311	1.02392
0.63654	0.695786	0.725048	0.763088	0.697285	0.780689	0.736631	0.768455	0.786993	0.748291	0.76293	0.776889	0.750935	0.736122	0.786524	0.70809	0.691773	0.71885	0.767625	0.8235	0.676996	0.675394	0.798392	0.648504	0.603877	0.597684	0.58702	0.591895	0.607915	0.6112	0.668639	0.646156	0.662492	0.660591	0.658701	0.676345	0.616236	0.670403	0.67834	0.686466	0.69479	0.703319	0.712059	0.721019	0.701842	0.683659	0.666395	0.649981	0.634356	0.601343
																															4.17142	4.18704	4.44562	3.68907	3.15257	2.7523	2.44222	2.19494	1.99312	1.8253	1.68354	1.56221	1.41979	1.42526	1.46294	1.30435	1.38681	1.05862	1.19637
	0.849408	1.18648	1.04322	1.33198	1.152	1.19469	1.22123	1.12524	1.19516	1.22785	1.17787	0.976991	0.99284	0.735474	0.884682	0.851407	0.842943	0.744366	0.805153	0.746295	0.798619	0.841987	0.755867	0.74206	0.756872	0.786996	0.787394	0.767893	0.76787	0.771112	0.755433	0.741086	0.73934	0.730918	0.722686	0.714637	0.696512	0.716705	0.720394	0.712177	0.749905	0.729359	0.718874	0.777201	0.745672	0.789491	0.857653	0.879487	0.824501
																							0.698733	0.704021	0.656323	0.614678	0.578003	0.545457	0.589633	0.587321	0.582964	0.583492	0.584021	0.580812	0.593714	0.607203	0.621319	0.636106	0.650217	0.664968	0.680404	0.696574	0.713531	0.531478	0.666138	0.619714	0.60292	0.587012	0.650871
		0.475779	0.458284	0.438518	0.429674	0.445656	0.466959	0.462648	0.472103	0.468107	0.484394	0.484032	0.483671	0.424591	0.474797	0.456931	0.448207	0.443017	0.466568	0.468219	0.460739	0.4638	0.466076	0.47625	0.478603	0.481034	0.500749	0.504994	0.501071	0.499753	0.485818	0.478258	0.471265	0.458316	0.450643	0.439189	0.424478	0.414562	0.41516	0.415387	0.420456	0.417287	0.414265	0.416069	0.426474	0.429142	0.44248	0.452238	0.480756
		0.390412	0.430365	0.440669	0.443506	0.447678	0.448895	0.440634	0.441617	0.458651	0.449197	0.471784	0.478119	0.523292	0.577686	0.626548	0.64753	0.654282	0.647326	0.607181	0.58331	0.572425	0.557567	0.544187	0.519179	0.51785	0.534292	0.501859	0.531561	0.531084	0.51632	0.497959	0.495204	0.515851	0.504294	0.498991	0.490191	0.499108	0.457081	0.47628	0.476991	0.473341	0.476927	0.499908	0.501425	0.507273	0.527734	0.498096	0.53977
																																																	0.654203
																												1.3278	1.22596	1.13863	1.06291	1.12919	1.0898	1.05306	1.01872	0.986548	1.06746	1.05688	1.0477	1.04794	1.02223	1.03271	1.04422	1.07684	1.06864	1.01846	0.98222	0.984664	0.932315
						0.719928	0.748471	0.667206	0.659184	0.651352	0.664219	0.677604	0.69154	0.67706	0.663174	0.649846	0.64004	0.630526	0.62129	0.612321	0.561408	0.569425	0.513325	0.474183	0.468365	0.462687	0.493707	0.518329	0.525643	0.696376	0.509521	0.519008	0.502456	0.500379	0.496409	0.490888	0.454999	0.464916	0.550894	0.458598	0.450943	0.449382	0.437924	0.432771	0.427738	0.40144	0.41973	0.417296	0.425302
																																							3.43206	3.22228	3.03668	3.35795	3.32098	3.45559	3.63613	3.78134	4.00861	3.80264	4.19258
											0.943837	0.96973	0.956981	0.890568	0.871812	0.826803	0.786213	0.749422	0.751915	0.754425	0.76176	0.76924	0.738824	0.766722	0.723681	0.657211	0.708652	0.722742	0.732151	0.705284	0.682173	0.697224	0.712954	0.745534	0.781233	0.786169	0.811582	0.821215	0.859593	0.815514	0.859172	0.873428	0.894926	0.894915	0.899168	0.960915	0.927071	0.89553	0.893886
													0.341232	0.388171	0.432281	0.492313	0.489358	0.493064	0.501717	0.486263	0.466054	0.459088	0.453498	0.446337	0.452083	0.464007	0.500135	0.50835	0.51029	0.526384	0.514985	0.501063	0.510318	0.474996	0.450289	0.438987	0.392048	0.444517	0.427718	0.40609	0.425593	0.411649	0.431356	0.452328	0.479531	0.485951	0.504171	0.518085	0.529234
																					0.233564	0.22271	0.207099	0.226057	0.257349	0.247894	0.23911	0.2761	0.28488	0.266385	0.255335	0.276783	0.288187	0.302264	0.314056	0.309115	0.327463	0.31428	0.302118	0.309842	0.317971	0.338684	0.355661	0.366383	0.417985	0.453792	0.453982	0.437344	0.460178
																								0.730811	0.753081	0.867347	0.885511	0.904451	0.92422	0.944872	0.966468	0.989074	1.01276	1.03761	1.02186	1.00658	1.11344	1.24568	1.24379	1.17708	1.01688	0.943577	0.880135	0.824687	0.829297	0.83396	0.838675	0.843444	0.848267
																																							0.751109	0.797256	0.765338	0.778295	0.791698	0.805572	0.81994	0.834829	0.85027	0.866293	0.882931
																																												1.03465	1.10875	1.05869	1.08487	1.12705	1.11656
																																																	0.304009


2nd Tx dose: 200ng INS
																																	6.53014	6.63592	5.83007	6.48492	5.80688	5.62381	5.39531	4.09017	3.11384	3.24844	2.45123	2.5722	2.77438	2.63668	2.78127	2.68898	2.62956
0.360477	0.368414	0.384402	0.363073	0.374589	0.439192	0.442482	0.503842	0.442616	0.407845	0.427335	0.420513	0.424342	0.493303	0.492181	0.551304	0.676552	0.688646	0.755578	0.728628	0.74358	0.677258	0.66721	0.648546	0.642115	0.642267	0.635168	0.665119	0.684929	0.741077	0.784387	0.812489	0.809202	0.794711	0.769016	0.711406	0.669219	0.649864	0.652705	0.671491	0.685714	0.673527	0.663085	0.674595	0.679083	0.689325	0.662787	0.642687	0.628361	0.614655
0.728571	0.897714	1.16914	0.965139	0.792387	1.0564	1.74139	0.864243	1.55843	0.883802	1.60924	0.940182	0.664083	0.838799	0.790495	0.78345	0.87035	0.785025	0.999102	0.7949	1.18129	0.938281	0.825626	0.858609	0.848681	0.981396	0.863453	0.917868	1.44808	1.4708	1.41133	1.35648	1.1903	1.27993	1.1858	1.07641	1.07617	1.00212	1.0593	1.02553	0.956346	0.941421	1.00361	0.975477	1.08088	1.16367	1.16389	1.38625	1.43062	1.15558
																																																	0.170378
0.929543	0.970849	0.956734	1.00666	1.23631	1.3387	1.31912	1.31437	1.38095	1.44176	1.37043	1.42507	1.414	1.40309	1.39235	1.55155	1.53219	1.66238	1.64988	1.63756	1.42936	1.25277	1.33413	1.40075	1.42327	1.47341	1.35666	1.30338	1.21742	1.22597	1.25031	1.19654	1.14147	1.08391	1.04539	0.942376	0.903942	1.07615	1.03504	0.912305	0.882546	0.812178	0.834571	1.04141	1.00745	0.963254	0.909449	0.829281	0.962352	0.820096
0.345183	0.330884	0.385893	0.405588	0.426182	0.421574	0.417064	0.41265	0.408329	0.405291	0.412685	0.350312	0.342545	0.351611	0.36117	0.371263	0.381937	0.393242	0.499191	0.683286	0.871586	0.799582	0.738567	0.686203	0.640773	0.572512	0.797581	1.31424	1.22062	1.32625	1.42813	1.51535	1.04433	1.66955	1.06222	1.59621	1.61244	1.20663	1.51764	1.22111	1.29942	1.4171	1.36637	1.42215	1.39434	1.24561	1.22451	1.13072	1.09376	1.11109
0.385903	0.388567	0.413202	0.38731	0.399922	0.428567	0.452486	0.479234	0.496056	0.514102	0.511232	0.508394	0.535165	0.538272	0.539586	0.549348	0.59068	0.560294	0.572681	0.568476	0.580401	0.592837	0.571605	0.620503	0.618578	0.597755	0.649222	0.663683	0.601558	0.637362	0.676273	0.684902	0.717438	0.71868	0.710495	0.707903	0.778619	0.750197	0.706325	0.706282	0.744799	0.731955	0.793224	0.797697	0.743468	0.770041	0.819169	0.820313	0.821461	0.822611
0.768977	0.823341	0.924743	0.945258	0.932517	0.974893	1.09392	1.18145	1.27924	1.31473	1.27011	1.23229	1.24624	1.26052	1.23774	1.35123	1.48762	1.48506	1.48468	1.51863	1.34767	0.949466	0.931436	0.897278	0.852448	0.840465	0.813882	0.775996	0.85031	0.812518	0.742851	0.764026	0.824612	0.855	0.690216	0.743117	0.604762	0.566751	0.550464	0.512948	0.525103	0.631931	0.572252	0.596793	0.55047	0.613264	0.609082	0.560894	0.595006	0.679236
0.572261	0.50724	0.517878	0.504122	0.484006	0.493499	0.486698	0.514152	0.474388	0.463614	0.483571	0.506416	0.474286	0.517391	0.474002	0.519793	0.542726	0.54922	0.57938	0.559185	0.549469	0.573915	0.54455	0.610035	0.614788	0.644179	0.642513	0.598159	0.637901	0.635106	0.579427	0.630259	0.611102	0.607396	0.587354	0.579944	0.55004	0.558666	0.53886	0.514326	0.528003	0.554774	0.517602	0.555976	0.531669	0.538629	0.5211	0.538762	0.55021	0.517889
0.85169	0.800852	0.758067	0.725766	0.704747	0.76416	0.695878	0.778108	0.637448	0.610864	0.653752	0.681857	0.694135	0.672901	0.5959	0.663664	0.596243	0.646032	0.621619	0.625619	0.635054	0.668859	0.666294	0.663748	0.673853	0.684271	0.695016	0.706103	0.66897	0.635547	0.605305	0.635628	0.669149	0.727265	0.673762	0.712898	0.700979	0.673258	0.718247	0.702234	0.68692	0.672259	0.658211	0.644738	0.631806	0.625743	0.619795	0.61396	0.636931	0.788157
5.77442	7.27371	8.06775	8.60616	9.22157	9.93177	11.7929	11.9775	11.7341	2.81498	3.59326	3.31725	5.73218	13.5081	7.7187	4.00057	11.5196	8.70198	15.1135	8.23894	11.2795	5.94912	5.94523	9.06591	9.29418	8.32875	7.84238	7.66124	7.72822	7.79637	6.79538	6.38431	5.6013	6.34267	5.46201	4.96065	3.33896	2.99815	2.64167	2.19834	1.97477	1.39228	1.27891	1.34042	1.37577	1.24071	1.09979	1.30902	1.57361	2.60613
												1.14326	1.23935	1.31234	1.27281	1.23559	1.43072	1.142	1.28569	1.23525	1.37774	1.27725	1.29126	1.31714	1.39964	1.45109	1.41383	1.50744	1.5238	1.65233	1.52288	1.75912	1.49801	1.60957	1.27191	1.24985	1.13892	0.726217	1.07913	1.1655	1.12536	1.11252	1.34755	1.35403	1.26545	1.20707	1.28655	1.3349	1.2513
0.91621	0.962698	0.905652	0.850565	0.84706	0.835573	0.807516	0.816011	0.763064	0.869492	0.875238	0.862018	0.910847	0.94956	0.949587	1.10514	1.21276	1.04578	1.12278	1.10897	1.17459	1.10212	1.10266	1.10319	1.15247	1.21793	1.01345	0.965777	0.995185	1.02644	1.00708	1.08966	1.01638	1.01706	1.01775	1.01844	0.987383	0.958162	0.93062	0.954249	0.97911	0.930391	0.886291	0.920344	0.95712	0.941888	0.927134	0.901242	0.915603	0.812845
5.56905	4.54497	4.66515	6.01259	6.32415	6.42306	7.54372	6.02591	5.95396	6.75212	5.4755	5.56593	6.42151	5.78492	6.69464	6.75939	7.2834	7.53374	7.8178	7.70657	7.78893	7.85427	5.99388	6.92854	6.46573	8.48156	6.57895	7.67922	7.94843	8.55911	8.90574	7.19501	6.41558	2.64104	2.27529	2.57807	2.9738	3.14124	2.81042	1.85796	1.87361	1.60506	1.65427	1.629	1.52415	1.70987	2.31431	0.871158	0.536567	0.40242
0.449155	0.460176	0.561837	0.568009	0.524512	0.514253	0.527043	0.444799	0.539098	0.564183	0.555912	0.442458	0.367464	0.487586	0.724386	0.723424	0.798696	0.776392	0.866065	1.03207	1.27679	1.10117	0.968016	0.863592	0.779504	0.959712	0.896767	0.84157	0.792775	0.849998	0.797736	0.811131	0.771774	0.743854	0.731848	0.898557	0.916925	0.913677	0.747054	0.787438	0.746294	0.96648	0.703439	0.833725	0.721376	0.746318	1.08738	0.966548	1.07789	0.915844
0.36734	0.383854	0.39741	0.397576	0.41581	0.412385	0.409429	0.392827	0.399383	0.373296	0.381037	0.37074	0.377819	0.402362	0.399734	0.441744	0.481397	0.496975	0.511386	0.531593	0.549637	0.551587	0.560172	0.54128	0.535215	0.526359	0.50136	0.494875	0.478349	0.490396	0.492034	0.511994	0.504462	0.537041	0.567726	0.591693	0.652984	0.753138	1.17622	0.735514	0.648175	0.491061	0.395253	0.330727	0.284313	0.249323	0.222001	0.200076	0.182093	0.182132
1.11463	1.17861	1.1415	1.22329	1.21911	1.28787	1.288	1.35273	1.18238	1.22426	1.19162	1.1887	1.22746	1.38222	1.49111	1.46129	1.48953	1.47183	1.53612	1.54188	1.48315	1.56092	1.61531	1.53834	1.45813	1.44811	1.40564	1.376	1.33184	1.35162	1.32838	1.25572	1.32459	1.33783	1.41937	1.36563	1.33181	1.33318	1.30324	1.27461	1.30286	1.32421	1.29889	1.26672	1.34201	1.31777	1.38066	1.44084	1.38599	1.40972
0.994818	0.863855	0.818762	0.838419	0.888046	0.808064	0.903575	0.952849	1.00207	1.36656	0.711015	0.480512	0.362873	0.291506	0.330823	0.3824	0.410289	0.401961	0.493698	0.578514	0.698516	0.810933	0.966474	0.80824	0.872093	0.945465	0.986209	1.03062	1.07923	1.33506	1.185	1.40742	1.43147	1.55791	1.43283	1.52786	1.30452	1.26922	1.28824	1.34261	1.40176	1.09527	1.06111	1.13111	1.05058	1.08577	1.22659	0.997446	1.04485	1.11406
5.25804	4.00076	2.14605	1.53168	0.798856	0.92109	0.471626	0.31696	0.349888	0.390452	0.441656	0.508315	0.598672	0.728099	0.744185	0.760997	0.778587	1.27812	3.56604	3.2866	3.04777	3.55384	4.26145	5.32089	7.0814	10.583	9.99389	9.46693	8.99276	8.56382	8.17394	7.81801	7.49179	7.1917	7.38099	4.74969	5.10929	5.25963	6.66027	6.43249	7.23742	5.57743	11.7678	7.24338	12.0735	8.64061	10.8136	9.06213	10.8315	9.31141
0.436712	0.480502	0.417885	0.369707	0.400847	0.437714	0.455166	0.564876	0.744271	0.790045	0.717668	0.71345	0.70928	0.713345	0.717457	0.721616	0.741634	0.906667	0.892527	0.690082	0.717079	0.816478	0.55695	0.582151	0.609739	0.640073	0.673583	0.710796	0.752361	0.799089	1.00311	0.645267	0.816794	1.11253	0.681308	0.641388	0.658788	0.648671	0.63886	0.629341	0.671952	0.607068	0.560205	0.650109	0.638201	0.642405	0.59543	0.528762	0.47552	0.414076
1.25987	1.20287	1.31761	1.29479	1.35874	1.173	1.03493	1.03517	0.986696	0.852173	0.927577	0.774485	0.908334	0.942236	0.986556	0.906895	0.943653	0.983516	1.0269	1.07428	1.12625	1.1835	1.10804	0.975372	0.881689	0.768237	0.886091	0.847844	0.812761	0.780467	0.750641	0.709062	0.671847	0.638344	0.608024	0.564167	0.599042	0.559994	0.569871	0.584799	0.448805	0.364128	0.338468	0.341617	0.379934	0.429644	0.419006	0.34963	0.295908	0.2853
																							0.458988	0.59848	0.633194	0.863185	0.799077	0.74531	0.698323	0.656909	1.1136	3.65378	3.78777	3.75973	3.88625	2.96578	3.51385	3.84803	3.04775	4.30222	4.32561	4.83013	5.71602	5.18782	4.74592	5.55329	5.34189	4.68674	3.45981
																																												1.12838	1.10236	1.16105	1.12654	1.09402	1.06333
0.514162	0.502283	0.496906	0.518922	0.561014	0.501545	0.495777	0.477318	0.460183	0.468353	0.445308	0.444029	0.443152	0.490094	0.48864	0.506052	0.522145	0.558007	0.558205	0.56685	0.584874	0.589908	0.610447	0.630363	0.644596	0.717326	0.739912	0.744537	0.776067	0.81062	0.829255	0.852307	0.851985	0.895911	0.913987	0.877913	0.87844	0.884938	0.881705	0.88717	0.882504	0.827185	0.839943	0.848186	0.816509	0.820109	0.813281	0.821842	0.848894	0.868287
1.19524	1.38322	1.40862	1.3787	1.67759	1.57363	0.748452	0.490988	0.473879	0.461139	0.456685	0.470621	0.448428	0.589126	0.858484	0.667792	0.745656	0.790628	0.56398	0.51965	0.616877	0.621977	0.520465	0.512039	0.444203	0.495689	0.477853	0.522583	0.643146	0.657121	0.66767	0.634117	0.628424	0.622832	0.666222	0.676328	0.554251	0.505367	0.51124	0.537758	0.617154	0.706934	0.754311	0.722321	0.745974	0.727938	0.708946	0.676258	0.697627	0.690091
1.06467	0.85199	1.07323	1.19184	1.14322	1.13428	1.04462	0.968088	1.25159	1.02572	1.01765	1.02221	1.05294	1.06045	1.02497	1.18899	1.34985	1.21778	1.40949	1.2718	1.4004	1.37215	1.3609	1.31958	1.30261	1.27685	1.34575	1.1959	1.18885	1.18188	1.10513	1.09235	1.11389	1.07431	1.03744	1.00303	0.970819	0.941361	0.830482	0.887151	0.811788	0.868018	0.917065	0.949362	0.853459	0.811987	0.739307	0.681521	0.67117	0.8088
1.55649	1.42897	1.2959	1.2242	1.12612	1.04609	0.920111	0.91457	0.906267	0.898113	0.858505	0.862751	0.842467	0.823116	0.809651	0.867003	0.946686	0.881514	0.932375	0.888746	0.959041	0.902141	0.851615	0.904714	0.93317	0.963474	0.93084	0.900345	0.871784	0.844979	0.819774	0.737987	0.671039	0.767484	0.79949	0.834282	0.788818	0.748054	0.733771	0.820949	0.773939	0.732021	0.694411	0.660476	0.679999	0.713237	0.717021	0.720845	0.724711	0.708655
[truncated: 174 more rows]
[truncated: 99 more columns]

## Sheet: TFEB_TR EI then Torin2
TFEB_TR; cells treated with EI then Torin2, at time points 4, 14; sampling time: 6 min; data are cells-by-time
2nd Tx dose: vehicle
[truncated: 801 more rows]
[truncated: 99 more columns]

## Sheet: FL_TFEB_TR EI then Torin2
FL_TFEB_TR; cells treated with EI then Torin2, at time points 4, 14; sampling time: 6 min; data are cells-by-time
[truncated: 803 more rows]
[truncated: 99 more columns]

[truncated: 6 more sheets: TFEB_TR EI then Rapamycin, FL_TFEB_TR EI then Rapamycin, TFEB_TR EI then MK2206, FL_TFEB_TR EI then MK2206, TFEB_TR EI then CHIR, FL_TFEB_TR EI then CHIR]
