# Supplementary material for: Continuous sensing of nutrients and growth factors by the mTORC1-TFEB axis
Source: eLife. 2023 Sep 12;12:e74903. doi: 10.7554/eLife.74903 (PMC10547473; doi:10.7554/eLife.74903)
Supplement: Figure 1—source data 2. [file elife-74903-fig1-data2.xls]

## Sheet: TFEB_TR 30min ins response 
TFEB_TR; 30min ins response
media	200ngINS	10ugINS
		2.16988
1.22168
1.44805	1.28431	1.43998
	1.33483	1.26699
	1.58678	1.14973
1.1711	0.941063	1.30233
1.08646	1.82595	1.54011
1.33381	1.55149	1.58486
1.03303	1.4984	1.25003
1.4033	1.48021	1.62223
1.23721	1.13308	1.2722
0.979508	1.41921	1.10256
1.36542	0.940799	1.68551
1.22639	1.09811	1.11151
0.951348	0.907726	2.18826
1.56013	1.05479	1.84109
	1.45614	1.36588
1.19096	1.6614	1.76251
	1.66225	1.24795
0.896067	1.48225	1.19408
1.99157	1.12941	1.46867
2.12867	1.58138	1.7828
1.26543	1.30832	1.61014
1.46303	1.43443	1.14886
1.35297	1.33103	1.00635
1.46435	0.905738	1.36917
1.03313	1.45282	1.6582
0.919448	1.49733	1.69948
1.266	1.3829	0.886079
1.12799	1.16937	1.23601
1.29095	1.19431	1.46631
1.19015	1.77588	2.09768
1.33473	1.23747	1.13563
1.67092	1.49328	1.11409
1.45034	1.18876	1.50208
1.47758		1.25237
1.69431	1.17441	1.58545
1.10292	1.12449	1.2969
2.00964	1.3299	1.43419
1.09026	1.45816	1.4431
1.59981	1.20541	1.12218
1.18327		1.72021
1.69681	1.27776	1.20247
1.14338	1.47612	1.53578
1.22976	0.937422	1.41382
	1.36138	1.63879
2.21547	1.47384	1.49026
	1.57709	1.86557
	1.45529	1.22155
1.19425	1.23159	1.13052
1.36252	1.25942	1.36724
	0.977396	1.43832
1.25332	1.13566
1.21283	1.33414	1.512
1.16541	1.54213	1.16547
1.15396	1.28578	1.56927
1.23256	1.67232	1.51106
1.39011	1.23987	1.68244
0.97459		1.24379
1.3463	1.18107	1.54256
1.42238	1.04402	1.36759
	1.4746
1.36365	1.84108	0.988079
1.35114	1.70824	0.874556
1.16305	1.56477	0.934815
0.854247	1.02026	1.35279
1.27301	1.16354	1.51033
1.31441	1.51992	1.38696
1.85534	2.28575
1.3851	1.64477
1.23989	1.28862	1.38096
1.30687	1.55415	1.41279
0.933812	1.79611	1.65522
1.17548	1.38142	2.15422
1.04232	1.31649
1.53518	1.81074	1.07953
1.19222	1.3381	1.70679
1.3417	1.35344	1.18543
1.09821	1.26732	1.42926
1.8051	2.44881	1.91491
0.921763	1.32974
1.07784	1.32853	1.29476
	1.37632
	0.8908	1.20039
1.01397	1.57157	1.51517
1.32308	1.54593	1.49595
1.00427	0.968679
1.24959	1.21712	1.61664
0.983134
	1.35659
1.11643	1.26399	1.27265
1.60028	1.50897	2.53718
1.40812	1.66225	1.23907
1.43225	1.75218	1.37067
1.50454	1.4429	1.42987
1.42016	1.94541	1.18855
1.08595	1.09303	1.32454
1.30434	1.49719
0.986022	1.31994	1.62547
1.19472	2.26269	2.1096
1.34425	1.36722	1.46077
1.16326	1.31814	1.61378
1.40642	1.59444	1.75648
1.98556	1.67496	1.46737
1.20044	1.12168
1.88135		1.83893
1.90995		1.08387
1.29225	1.36344	1.27451
1.19424	1.21553	1.48505
1.08455	1.14678	0.922884
1.4564	1.27425	1.38354
1.31328	1.53857	1.72449
1.68235	1.15482	1.23374
1.69839	1.73675	2.20138
1.14511	1.50516
0.968702	1.55976
1.58453	1.2589	1.61076
	1.3437	1.3834
1.30244	1.3302
1.13304	1.8691
	1.38141
1.20916	1.6191	1.16534
1.03082		1.02919
1.36114	1.35114
1.29046	1.42258	1.20047
0.940843	1.42637	1.34338
1.12002	2.0212
1.01004	1.64232	1.25625
0.993581	1.30273	1.34532
1.29209	1.05441	1.19596
1.23492	1.30756	1.66936
	1.28536	1.15911
1.31404	1.62947	1.27557
1.05494	1.44807	1.31567
1.26251	1.4867	1.19437
1.20352	1.39154	1.67929
0.893184	1.32547	1.30532
1.2352	0.968643	1.7021
2.25067	1.25923	1.80977
1.11234		1.6551
1.44161	1.44174	1.21797
	1.73825	1.40887
1.2576	1.27914	1.10889
1.25281	2.10822	1.45089
0.876744	1.35197
1.33424	2.11604	1.51862
1.34801	1.15205
1.43052	1.26724
1.43754	1.48637
1.19975	1.02227
1.32706	1.35222	1.5939
	2.16797	1.56578
0.990692	1.31273	1.60418
1.19354	1.23696	1.75378
1.87801	1.61262	1.37438
	1.43253	1.59122
1.1049	1.4888	1.81112
1.35963	2.49023	1.49211
1.23428	0.993066	1.34891
	0.949541	1.37079
1.16929	1.47773	1.83318
1.35452	1.32199	1.41637
1.38408	1.87211	1.31974
1.39367	1.61788	1.16546
1.39163	1.95462	1.73929
0.858618	1.30501	1.23669
1.45263	0.950954	1.23675
1.34128	1.20963	1.33696
1.09195	1.29055	1.44124
1.57769	1.31947	2.04877
	1.54994	1.2438
1.39154	2.25341	1.63184
1.45688	1.29736	1.32457
1.42996	0.922592	1.17805
1.70237	1.23048	1.2165
1.4296	1.45047	1.38636
1.09144	1.07632	1.60075
	1.39831	1.72804
1.25029	1.18443	1.58158
1.52775	1.58022	1.14922
1.64464	1.54529	1.44298
2.0463	1.41066	1.51075
1.06452	1.19183
0.918001	1.24787	1.409
1.46453	1.35851	1.64943
0.938956	0.987789	1.41108
1.20099	1.35301	1.21749
1.88705	1.14238	1.45226
1.284	1.40879	1.43916
1.14677	1.21074	1.39993
1.24141	1.94434	1.39992
1.53896	1.19361	1.27834
1.15079	0.953749	1.10292
1.57172	1.16171	1.26843
1.27208	1.86934	1.38282
1.10628	1.332	1.05222
0.859248	1.62285	1.59338
2.05677	1.4988	1.67791
1.12695	1.29936	1.41623
1.36233	1.72978
1.64219	1.40812	1.24249
1.35428	1.44908	1.80872
1.25226		1.78163
1.00629	1.68072	1.68068
1.15756	1.74739	1.21607
1.23707
1.32042	1.06205	1.3627
1.16531	1.40414	1.31365
1.09027	1.31213	1.38457
1.16604	1.1812	1.68249
1.48178		1.70374
1.11183	1.81893	2.07897
1.10221	1.84522	1.14764
1.02887		1.24991
1.4617	1.5566
1.86162		1.17226
1.02825	1.80481
1.15626	1.48809	1.36863
1.11794	0.872892	1.16567
	1.33753	2.41046
1.91231		1.10376
1.3117	1.67227
1.1266	1.10416	1.17681
1.24674	1.37286	1.19717
1.19328	0.971315	1.33497
1.31866		1.30557
	1.30228
1.36773	1.2234	1.24944
1.37207	1.33466	1.83551
1.15912	1.50904	1.59284
1.23191		1.5765
1.03218	1.30817	1.12579
0.859675	1.31744	1.25217
1.21689	1.99643	1.45143
1.32059	1.33875	1.00022
1.2067	1.19045	1.83352
1.44502	1.49319	1.14583
1.29089	1.08827	1.45528
1.11767	1.52025	1.35143
1.39414	0.991665	1.30711
1.44064		1.04074
0.940651	1.19785
1.53398	2.00301	0.887076
1.2159	1.27356
1.26132	1.35608	1.87084
1.31896	1.53733	1.35141
1.04661	1.40217	1.4397
0.944233	1.08531	2.14976
1.09049	1.0607	1.22752
1.25988	1.25389	1.51516
1.28441	1.2808	1.9734
0.849704	2.20784	1.25142
1.60366	1.41807	1.23609
0.875414	1.04565	1.29506
0.89009	1.30645
	1.1844	1.63553
1.41702	1.53141
1.06361	1.23572	1.31259
1.3566	1.23686	1.05601
1.19166	1.33123	1.43061
1.17385	1.22352	1.5905
1.63329	1.62519
1.23688	1.22835	1.41414
0.909046	1.4026	1.25041
1.2901	1.38936	1.45688
1.2851	1.47845	1.05825
1.23353	1.37931	1.42785
1.55021	1.35895	1.55947
0.953679	1.2085	1.46901
1.39896	1.06074
1.38112	1.28596	1.58762
1.35999	1.45358	1.1913
1.23309		1.35337
1.26455	1.32039	1.51051
1.20473	1.46947	1.80777
1.11951		1.08868
1.71594	1.93732	1.52203
1.0637	1.70741	1.77734
1.24152	1.31397	1.56526
1.21796	1.32183
1.36487	1.50497	1.36084
1.05321	0.98074	1.15538
1.04753	1.24844	1.26614
1.21342	1.39948	1.52901
1.25351	1.27629	1.28683
1.1548	1.33895	1.43717
1.69657	1.14793	1.29197
1.08447	1.14729	1.19967
1.12148	1.35205	1.4547
0.980611	1.23513	1.82573
1.28351	1.3961	1.07752
1.23221	1.30761	1.45477
1.32362	1.48278	1.53694
1.05302	1.18166
1.53068	1.0522	0.929803
1.01569		1.5122
1.24136	1.1511	1.60388
0.914643	1.59589
1.26749		1.49307
1.5008	1.37049	1.30278
1.02197	1.16189	1.25922
1.00566	1.30988	1.64654
1.38513	1.69815	1.36809
1.20609	1.45646	1.36483
0.991555	1.00655	2.07268
0.922847	1.36637	1.13403
1.21309	1.51214	1.01959
1.41653	1.08053	0.986494
1.18764	1.15746	1.39198
1.23496	1.73422	1.17204
1.08832	1.5527	2.06643
0.966069	1.62291	1.34129
1.13067	1.82447	1.43822
1.60214	1.60604	0.986226
0.894937	1.12227	1.36374
1.47577	0.917102	1.35108
2.09338	2.02729	1.4687
1.24181	1.47798	1.49337
1.53662	1.46221	1.87981
1.73931	1.35454	1.20829
1.12314	1.71396	1.4782
1.09778	1.33907	1.50256
1.09613	1.12667	2.54963
1.14752	0.986632	1.56037
1.27557	1.16701	1.07318
1.11159	1.28258	1.38855
1.33764	1.98172
1.14969	1.19511	1.42991
1.30156	1.51401	1.5981
	1.48463	2.29525
1.52523	1.66206	1.73968
1.14341	1.60218	1.32864
1.28161	1.41425	1.5297
1.21666	1.22055	1.23411
1.40202	1.69069
2.02149
	1.59725	1.55656
0.999387	1.9163	1.58343
1.06685	1.52658	1.48455
1.13113	1.06892	1.37532
1.1046	1.52324	1.40413
1.25142	1.23708
1.10432	1.1892
1.1423	1.48329	1.07796
	1.31538	1.71428
	1.6297	1.28741
1.02443	1.40105	1.0063
0.836064		1.16469
1.19645	1.65356	1.22137
1.58327	1.43593	1.43043
1.16313	1.32963	1.80961
0.982371	1.15401
1.2526	1.42948	1.50533
1.00313	1.41355	2.09335
1.06705	1.29263	1.12173
1.00493	1.17865	1.02725
1.37266	1.17745	2.10187
0.901285		1.41269
1.18158	1.5322	0.920747
1.40601	1.36383	1.52877
1.0693	1.47186	1.36477
1.20204	1.62537	1.94456
1.15308	1.53618	1.20794
1.67125	1.21137	1.2294
0.936707	1.47719	0.921906
1.49691	1.27474	1.20901
1.23665	1.27216
1.00145		1.62395
1.75295	1.44964	1.42605
1.73006	1.18778	1.55645
1.23439	2.04674	1.13269
1.03663	1.44223	1.09758
0.958664	1.87752	1.19165
1.54641	1.47395	1.85975
1.3099		1.10878
1.07617	1.36341	1.54417
0.878826	1.28204	2.0717
1.10421		1.12541
1.41427	1.49768	1.52316
1.12677	1.16944	1.26287
	0.907782	1.39761
1.29497	1.12664	1.32513
1.08774	1.1156	1.82301
1.17883	1.19456	1.44321
1.11406		1.28233
1.21463	1.49449	1.58358
1.14293	1.36826	1.566
1.15618	1.54885	1.74495
1.41716	1.5716	1.25793
1.24375	1.08679	1.59575
0.966692	1.54942	2.07191
1.22145	1.20474	1.05772
1.0343		1.42452
1.06108	1.35413	1.34974
1.3243	1.3225	1.26263
	2.33786	1.62857
1.27228	1.41348	0.991494
1.641		1.27602
0.847193	1.25239	0.958893
1.49922	1.93773	1.18075
1.30951	1.25141	1.12893
1.21686		0.995083
1.37658	1.17598	1.21999
1.4489	1.44151	1.14684
1.03439	1.42566	1.28987
	1.69152	1.31263
1.2087	1.26902	1.15371
0.875666	1.52601	1.71028
1.58873	2.12303	1.4964
1.02328	1.41824	1.35731
0.823158	1.5256	1.53302
1.52767	1.67375	1.52973
1.41204		1.65393
1.02206	1.40631	1.38906
1.30507	1.04015	1.2226
	1.29224
0.882026		1.09957
1.1755	2.10715
1.14499	1.42714	1.25697
1.15144	1.27175	1.01176
1.00377	0.899711	1.25853
	1.42491	1.56599
1.42552	1.10443	0.98729
1.09568		1.12432
0.988188	1.95867	1.44335
1.34588		1.46317
1.20992	1.13905	2.49333
1.15989	1.68464	1.27268
1.19006	1.81865	1.64934
0.996143	1.39894	1.27071
1.0257	1.34409	1.39208
0.832849	1.08697	1.35599
0.919941	2.13851	1.39687
1.62898	1.21248	1.12974
2.11858	2.39934	2.54208
1.02663	1.16062	1.30956
2.2702	1.24496	1.16015
	1.50429
0.914934	1.53088
1.41155	1.49399	1.32237
	1.40352	0.916921
1.37591	0.889732	1.09798
1.304		1.3643
0.968493		1.64552
1.13778	1.01557	2.22088
1.16388	1.30129	1.41308
1.06034	0.84976
1.95464		1.13755
0.809731	1.24399	1.46086
1.08404	1.38762	1.59697
0.934309	1.32993	1.27413
1.32748		1.12192
1.51461	1.50182
	1.22584	1.15555
1.41114	1.66917	1.1378
	1.71563	1.3932
1.22236		1.05329
1.43097		1.43414
		1.39579
1.37758	1.3014	1.5554
	1.54952	1.40383
1.21878	1.21723	1.26361
1.17102	0.865921	1.20249
1.00593	1.40295	1.91797
0.98163		1.05408
1.17011	1.29076	1.36749
0.976893	1.72253
1.21331	1.04173	1.9637
1.1344		1.29729
	1.35753	1.59216
1.19423	1.33772	1.87106
	1.39265
1.45076	1.40355	1.16204
1.2015	1.57021	1.32106
2.02414	1.36428	0.865603
1.24604		1.31023
1.09782	1.6679	1.24667
	1.43918	1.46474
1.04463	1.19253	0.914361
1.34713	1.07605	1.35236
0.931051		1.17289
1.01862	1.3984	1.24618
1.26621		1.37488
1.0802	0.951686	1.08827
1.24948	1.28365
	1.21167	1.54489
1.21228	0.946599	1.07291
		1.38251
1.11323	2.14091	0.970461
1.11616	1.25502
0.926957	1.35418	1.38932
1.1734	1.3642
1.36699	1.31069	1.17262
2.01808	2.56764	1.16859
0.870363	2.50809	1.22976
1.06605	1.56946	1.15066
1.38186	1.2351
1.25093	1.4445
1.2841	1.01067	1.13122
1.24616	1.30297	1.944
1.09176	1.10143	1.18106
1.06531	1.60558	1.33527
	1.02914	1.50086
1.08801	1.33274	1.51779
	0.985308	1.42106
1.1039		1.39002
1.16552	1.4675
1.17591		1.24357
1.30595	1.64586	1.36175
1.30909	1.00146	1.68954
0.919831	1.85575	1.16315
1.42783	2.58423
1.09132	1.50188	1.67751
1.29321	1.51342
1.24715	1.21253	1.15356
	1.10004	1.74798
1.34252	1.41257	1.03324
1.18956	1.34239	1.46403
1.21147	1.22793	1.18716
1.02044	1.5101	2.03752
1.04042	1.35166	1.53262
1.0162	1.4248	1.31909
1.30666	1.41388	1.32903
1.25179	1.14298	1.0581
1.17077	1.56131	1.14013
1.38692	1.64235	1.25075
0.992688	1.2047	1.72465
1.00267		1.31632
1.07078		2.05538
1.0209	1.40487	1.29336
0.989382	0.989886	1.64288
0.923758	1.3081	1.42411
1.25664	1.13151	1.46513
1.20159	1.28504	1.35267
1.23453	0.990835	1.27166
1.18949	1.69026	1.41386
1.22049	1.88161
1.18415	2.47743	1.32355
1.72319	1.06982	0.874796
1.12318	1.89537	2.25318
1.17974	0.973198	1.29158
1.03636	2.03714	1.35702
1.04754	1.35335	1.47435
1.29538	1.514	1.73455
0.98067	1.41845	1.49651
1.29134	1.32754	1.60906
1.29136	1.0732	1.15585
1.64132	1.26311
	1.14089	1.43917
1.53857	1.05194	1.41489
1.26824	1.60978	0.854495
1.03064	1.62214	1.48146
1.23418	1.38067
	1.47522	1.17628
1.29931	1.2232
1.02212
1.61336	1.44363	1.26958
1.27281	1.50398	1.15588
1.1702	1.61724	1.48133
1.24132		1.65307
1.1483	1.78911	1.22843
	1.72149	1.21599
1.27723	1.1341	0.880739
0.98126	1.48055	1.35668
1.37987	1.15712	1.56376
	1.04986	1.34581
1.06843	0.94384	1.1274
1.39631	1.06506	1.84546
1.28518	1.2204	1.41638
0.967965	1.35039
1.11665	1.36174	1.33101
1.21471	1.3398	1.63858
0.985407	1.30268	1.40902
1.26432	1.23134	1.23224
1.23827	1.21176	1.18071
1.34422	1.21227	1.38704
	1.41342	1.23021
1.04527	0.985482	1.32392
1.1182	1.46984	1.30035
1.23584	1.54665	1.05763
1.28723	2.21988	1.95141
1.37205	1.87395	1.30533
1.2822		1.66346
1.3399	1.34949	1.43576
	1.48425	1.14052
1.47927	1.13011	1.78168
1.11451	1.34573	1.57396
1.34283	1.54357	1.47929
1.20697	1.87954	1.17915
1.25015	1.98438	1.58246
1.17123	1.39206	1.97577
1.86196	1.32786	1.50232
1.18495	1.26329
1.30174	1.41834	1.93395
1.59187	1.2901	1.40639
1.20258	1.70751	2.01289
2.06733		1.16953
1.34519		1.24389
1.2477	1.48032	0.96367
0.93351	1.00069	1.22559
1.10404	1.30195	1.73379
1.45276	1.25373	1.21712
0.837284	1.07305	1.4337
1.35433	1.18943	1.26446
	1.49704
1.1545	1.35775	1.45496
1.05941	1.30555	2.4278
1.44946
1.60998	1.08105	1.6318
1.15221	1.89374	1.54059
	1.31562	0.956931
1.19141	1.21325	1.69679
	1.32108	1.19986
1.19054	1.665	1.70401
1.02429	1.33804	0.961229
1.40734	1.86997
1.20156	1.43476	1.11416
1.28288	1.44643
0.988618	2.10929	1.44799
1.27317	2.32131
1.30972	1.37895	0.997876
1.29017	1.76276
1.18699		1.40703
1.22394	1.25422	1.53988
1.41283	1.62332	1.38241
1.16298		1.51968
1.07646	1.47665	1.67011
1.05099	1.36187	1.45773
1.41698		1.38214
1.41588	1.2414	1.2603
1.17753	1.25244	1.27224
1.08598		1.52231
1.21582	1.40813
1.37851	1.75691	1.54506
		1.56551
1.43346	1.27516	1.7898
0.898932	1.2193	2.19664
1.08191	1.25079	1.54322
1.6268	0.880102	1.44254
1.15447	1.66628	1.38033
1.25367	1.20779	1.59626
0.989172		1.32388
1.13836		1.45923
1.25577	1.45694	1.555
1.4251		1.44629
1.15906	0.89014	1.33931
1.25927
1.18148	1.46112	1.09915
1.16179	1.47507	1.78537
1.28984	1.93581	1.11887
1.3625	1.38852	1.37242
1.04811	1.44338	1.50996
1.36234	1.23379	1.79447
1.33354	1.10334	1.27817
1.33046	1.26944
1.30325		0.952079
	1.39777	1.29022
1.21518	1.46227	2.61407
0.934146	1.3025
0.849682	1.19348	1.28672
1.2415	1.86571	1.18216
0.993371	1.60312	1.28678
1.14658	1.06044
1.3124	1.06932	1.6673
1.31989	1.3869	1.47496
1.3768		1.41707
1.81403	0.976449	1.74481
1.10732	1.37292	1.35108
1.3503	1.11319	1.30242
1.15882		1.26464
1.28761	1.37166
1.95376	0.994211	1.28308
0.966212	1.02122	1.43316
1.17147	1.70978	1.28624
1.42637	1.30446	1.23542
1.34739	1.18414	1.45632
1.35137	1.08649	1.54702
1.35527	1.25001	1.36466
	1.39126	1.73144
0.972104	1.3151	1.49596
1.10253	1.34748
1.0774	1.33831	1.304
1.25864	1.12666	1.50806
1.27952	1.23234	1.04816
	1.32452	1.95287
1.09169	1.71747	1.54747
1.40115	1.22015	1.36642
1.07927	1.29651	1.4341
1.24035	1.26177	1.44312
1.13026	1.10747	1.35104
		1.33941
1.461	1.20453	1.26186
1.22619	1.25674	1.03136
1.32114	1.29993	0.855201
1.12035	1.28064	1.10646
1.28972	1.41341	1.11253
0.951709	1.26712	1.32415
1.25169	1.57007	1.31397
1.33107	1.2698	1.1537
1.10733		1.45202
1.02416	1.40156	1.34835
0.874618	1.23661
1.08878	1.12189	1.44514
0.896791	1.25277	1.25889
0.916254	1.20875	1.55078
1.27431	1.0886	1.83588
1.41086	1.33063	1.2776
	1.08329	1.57502
1.47262		1.41567
1.87528	1.7152	1.75112
	1.50614	1.50128
1.3146	1.36054	1.43966
1.23279	1.23557	1.239
0.925154	1.31609	1.23498
1.67669		2.82759
	1.07927	1.35027
0.891569		1.10918
	1.10779	1.33362
1.04721	1.20876	2.04139
1.19987	1.16533	1.40174
	1.13359	1.16144
1.29764	1.69011	1.20218
1.33301	1.54107	1.32127
	1.56563	1.07033
1.23273	1.05029	1.60325
0.965525	1.18098
0.95776	1.26302	1.5118
1.74096	1.30177	1.22514
1.18162	1.2379	1.4302
1.26142	1.64282
1.2132	1.17037	1.14861
1.34991	1.42212	1.47499
1.11474	1.52563	1.02734
	1.34275	1.16314
1.10023	1.68897
1.36487	1.08927	0.945402
1.34001		1.33333
0.907788	1.37485	1.14644
1.10339	1.08057
1.1104	1.42805	1.27198
1.18539	1.17223	1.09251
1.3586	1.42117	1.44639
1.09747	1.46871	1.12466
1.0771		1.59098
1.18216	1.11176	1.19583
1.03195	1.49464
0.949022	0.923582	1.29106
1.56141	1.25035
1.20408	1.09973	1.56531
1.2163
1.15216	1.59397	1.33512
1.1334	1.47301	1.98019
1.30896	1.2875	1.55059
1.22989	2.25016	1.33366
		1.42846
0.907865	1.35175	1.11533
1.17666		1.40472
1.01372	1.50307	1.54124
1.15661	1.50409	1.47444
1.38213	1.28692
1.06702	1.42315	0.851558
1.04648	1.98484	0.913548
1.1418	1.09214	1.35139
	1.58334	1.37559
0.954029	1.12163
1.21204	1.46541
1.34642	1.40357	1.21092
1.24322	1.05914	0.948851
0.927444	1.30511	1.73905
1.02942
1.43661	1.28697	1.03803
1.26398	1.09327	1.40609
1.66753	1.40424	2.6939
0.972121	1.53588	1.42115
1.32528	1.15444	1.11572
1.18598	1.37055	1.74525
	1.43253	1.36883
1.08856	1.45276	1.39847
1.12804	1.3929	1.48016
1.03171	1.41223	1.45152
1.03843	1.32585
1.10184	1.30863	1.373
	1.30813	1.55493
1.22779	1.43248	1.4846
1.07053	1.50926	1.11443
1.27246	1.67274	1.4814
1.29038	1.42799	1.40144
1.15264	1.20806	1.56544
1.16041	1.48082	1.14364
1.28006	1.10732	1.11183
1.26055	1.64671	1.04634
0.959776	1.28096	1.50696
1.19397	1.5883	1.29425
	1.83141	1.16158
0.839821	2.10283	2.0968
1.18097	0.964352	1.40616
1.78463		1.47204
1.36966	1.53926
1.45987	1.44553	1.12346
	1.48992	1.4215
1.18595	1.64626	1.52578
1.07958		1.15407
1.17477	1.42146	1.51149
		1.9838
	1.32357	1.57415
	1.35195	1.24819
1.14776	1.65663	1.18312
0.971977	1.15131	1.00621
1.18998	1.08453	1.12807
1.44684		1.09451
1.00012	1.19131	1.19679
1.47811	1.8057	1.63967
1.08447	1.46915	1.30718
1.29557	1.6079	1.39443
	1.37118	1.45693
1.19518	1.66696	1.25332
1.26553		1.07328
1.84212	1.55667	1.02354
1.32871		1.23057
		1.23206
1.25559	1.64023	0.836224
1.155	1.49412	1.29794
1.15202	1.23591	1.06903
0.98221	1.30663	1.33106
2.08431		1.10034
0.88181	1.4509	1.25732
0.966528		1.53308
1.06025	1.16099	1.37969
1.38833	2.27236	1.09538
1.08028		1.18671
1.35528	1.49533	0.991431
1.36114	1.1003	1.57367
		1.46022
1.27922	1.49999	1.263
1.26909	1.45832
1.16622	1.39666	1.89468
1.32034	1.27742	1.58291
1.40866	1.21409	1.02902
1.33567	1.43255	1.4526
1.18972	1.45959	1.50687
0.954529	1.33852	1.07924
0.969687	1.507	1.1527
1.36044	1.11905	1.44074
1.15926	1.39454	1.05192
1.31575	1.23708
1.14304	1.12557	1.15211
1.27023	1.54175	1.29435
1.1654	1.07313	1.30265
1.2594		1.40108
1.17029		1.15943
1.02313	0.995114	1.34789
1.11959	2.01598	1.06659
1.47155	1.75989
1.07812	1.50937	0.893605
1.65213	1.1368	1.49105
1.04709	1.14763
1.1272	1.72447	1.51508
0.864133	1.58579	0.93552
0.803896	1.02078	1.49269
1.15719	1.03961	1.48201
1.06706	0.988611	1.35045
1.1995	1.11171	1.16782
1.41972	1.16528
1.15825	1.57245	0.992856
1.12723	1.12786	1.21789
0.996903	1.62039	1.06609
1.62677	1.11576	1.35313
1.30256	1.29695	1.01411
1.0533	1.24164	1.52059
1.00076	1.40077	1.12348
0.901443	1.58995	1.91873
1.20588	1.30041	0.989238
	0.953298	1.87713
1.61269	1.45708	1.5928
1.23144		1.3302
1.15408	1.23332	1.80457
1.31041	1.04564	1.02495
1.21253	1.09474	1.03437
	1.44947	1.35641
1.27644	1.0446	1.78017
1.00738	1.84581	1.19609
1.1408	1.71674	1.26868
1.37696	1.35117	0.95918
1.06324		1.6415
1.43904	1.10351	1.34091
0.932561	1.1322	1.29921
	1.40023	1.25477
1.37751	1.68681	1.54252
1.25412		1.50829
1.34082	2.23692	1.0401
	1.39004	1.57452
	1.31025	0.994502
1.04451	1.77122	1.2926
1.30851	1.2922	0.921111
0.863915	1.25811	1.06
1.11505	1.39153	1.48971
1.60403	2.08794	1.84103
1.19433	1.65424	1.42509
1.40382	1.29526	0.902407
	1.40451	0.998368
1.36934	1.40234	0.931796
1.36455	1.25215	1.04167
1.13164	1.36316	1.3442
0.903861	1.01734	1.51597
1.13934		1.30521
1.12797		1.06183
1.36892	1.29442	1.53331
0.972891	1.13915
1.25669	1.30268	1.45982
1.17704	1.44065
	1.41605	1.71836
0.911921	1.8727	1.3599
1.76612	1.22846	1.20714
1.14436		1.19755
1.20216	1.37357	1.20534
1.31819	1.54722	1.36211
1.87578	1.24078	1.31204
1.17567		1.5285
1.33757	1.16401	0.913614
1.75706	1.27185	1.30695
1.52047	1.37597	1.64184
1.19037	1.37452	1.06513
1.20175		1.31815
1.06764	1.22462	1.19481
1.14628	1.35288	1.34331
1.28593	1.20854	1.21797
1.1806	1.94404	1.63399
1.00114	1.57244	1.21197
1.49724	1.3304	1.38419
	1.21224	1.09984
1.31427	1.19486	1.5554
1.02815	1.47441	1.39742
1.28556	1.80168	1.06275
1.08004	1.41669	2.14906
0.964276	1.31251	1.22712
1.46767	1.40285	1.04296
1.50823	1.14524	1.16137
1.13736	1.48933	0.94813
1.08149	1.24602
1.35656	1.48423	1.44758
	1.31543	1.35655
1.10293	1.49014
	1.23528	1.38084
1.27986	1.35006
1.36058	2.16989
1.13016	1.58336	1.27046
1.31256	1.36699	1.19996
1.10321		1.32523
1.42878	1.53056	1.36282
1.21304	1.4242	1.24454
1.26205	1.75763	1.5235
1.29224	1.51883	1.02722
0.864811	1.40181	1.10637
1.2794	1.30423	0.941734
1.05227	1.32864	1.31288
1.29647	1.20205	1.43955
1.38685	1.57232	1.8204
1.2879	1.97991	1.08985
0.866232	1.0849	1.37411
1.16263	1.34445	0.948485
1.86231	1.16636	0.928534
1.07682	2.15722	1.36545
1.24504	1.07486	1.31746
1.05771	1.27745
1.10734	1.11771	1.14776
	1.28732	1.14199
1.342	1.19372	1.74208
1.22272	1.32303	1.51128
1.07367	1.18446	0.904039
0.918764		1.66411
0.880968	1.56481	1.01907
	1.30075
1.23108	1.68655	1.36628
0.998323	1.95215	1.04225
1.31569	1.27307	1.41878
1.29636	1.65049	1.12215
1.14909	1.4101	1.71461
1.07627	1.02739	1.73831
1.00216	1.18085	1.08951
0.898914	1.11918	1.27534
1.18137		0.899101
	1.57542
	1.28399	1.26072
	1.42827
1.05013	1.46915	1.40831
1.01582	1.05728	1.36329
1.6788	1.31495
1.24887	1.5032	1.63461
1.31968		1.25051
1.22444	1.40386	1.60631
1.38602	1.70689
1.5407	1.3801	1.1106
0.858166	1.6157
2.08806	1.2392
1.15502	1.23297	1.16648
1.13484	1.5183	1.0009
1.0082	1.62504	1.4813
1.09993	1.1484	1.28028
1.25618		1.31897
0.883127	1.11148
1.21628	1.07528	1.15373
0.935191	1.35292	1.31328
1.12582
	1.19899	1.34678
1.06806	1.24468	2.16865
1.25736	1.2437	1.08472
1.68181	1.27191	1.13056
1.10176	1.58526
1.47448		2.39484
	1.33088	1.12218
1.10045	1.67287	1.45426
1.10721	1.71536	1.31173
1.32267	1.14312	1.69811
	1.30289	0.980197
1.12366	1.53948	1.03324
		1.3936
0.958729	1.43262	1.3287
1.42238		1.32391
	1.43478	1.43265
	1.10336	1.25935
1.31604		1.75189
1.26327	1.20206	1.15527
1.25333	1.49832	1.592
1.16107	1.38487	1.50288
1.18683		1.27876
1.23475	1.20242	1.80613
0.960596	1.39936	1.01175
1.34444	1.42008	1.2621
	1.337	1.31472
1.21209	1.64224	1.05912
1.1189	1.60184	1.44893
1.15682	1.15257	1.87071
		1.54109
0.969264	1.63788	1.13285
1.35102	1.54188	1.49151
1.19773	1.32368	1.27524
	1.37483	1.35727
1.14428	1.3166	1.60006
0.974851	1.41469	1.0034
2.01701	1.18513	2.04892
1.27387	1.26537	1.39864
	1.28119
1.13084	1.17794	1.35256
	1.57306	1.14975
2.15157	1.10296	1.46102
1.13969	1.25558	1.70742
1.03665	1.23032
1.48236	1.60816	1.53726
1.37345	1.13296	1.2163
0.961242	1.25655	1.38763
1.21521	1.76824	1.36226
1.23738	1.32319	1.1534
1.30666	1.4748
1.35136	1.27496	1.15494
0.865962	1.41197	0.980162
1.3594	1.00292	1.23631
1.06447	1.24024
1.32911	1.34171	1.34333
1.21987	1.26123	1.01083
1.1268	1.11673
1.35916	1.27285	0.955405
1.47974	1.24855	1.0858
1.29211
1.31512	1.32649	1.20927
0.870493	1.4654	1.28065
1.24032	1.43988	1.27103
1.38588	1.25968	1.15246
1.38099
1.26317	1.42417	1.23268
0.946126	1.37044	2.12023
1.47184	1.14636	1.31434
1.38355	0.977297
1.17826
1.34404	1.48706	0.989445
1.03506	1.25699	1.14867
1.0206	1.49216	1.07647
1.35906	1.87031	1.40323
1.01967	1.0085	1.60554
	1.37748	1.68795
1.45622	1.17638	1.13311
1.68488
1.48121		1.28678
1.59998	1.15949
1.31565	1.28995	1.39355
1.4291	1.5101	1.12084
	1.18703	1.3403
1.24502		1.03796
1.09953	1.625	1.23534
1.2855	1.55733
1.28833	1.49842	1.34497
1.10686		1.43888
	1.10419	1.7251
1.35686	1.67898
1.07252	1.53829	1.58167
1.21442	1.25252	1.31518
1.19654	1.14101	1.2065
1.39725	1.40117
1.09403	1.42434	1.38623
	1.11903	1.61781
1.23545	1.3261	1.5267
0.969104	1.29194	1.169
1.25825	1.30306
1.72679	1.1852	1.12664
0.920001	1.40126	1.09894
	1.27906	1.32502
1.13862	1.3966	1.10271
1.26386	0.980475	0.89685
1.1819	1.34809	1.15239
1.16496	1.40494	1.10166
1.24637	1.35821	1.4469
1.13972	1.25976	1.22333
1.27738	1.69015	1.34928
	1.66326	1.68698
1.27112	0.934133	1.24485
1.11083	1.69037	1.03597
1.14725	1.36689	1.18242
1.01244	1.20383	1.31756
	0.963941	1.57305
1.21962	1.05458	1.10414
1.02403	1.24097	1.27899
1.06764	1.91519	1.13505
1.44304	1.02522	0.972801
1.2804	1.20704	1.27483
1.00221	1.65025	1.11646
	1.1962	0.892593
1.0351	0.988034	1.40889
0.828091	1.34537	1.30301
0.967005	1.47975	1.32931
1.2044	1.23096	1.15742
1.2258	1.01637	1.52678
	1.25885	1.42525
1.27671	1.08222	0.860647
1.0237	1.09767	0.93079
1.48856	1.36161	0.966603
1.37164		1.06623
	1.79352	1.19859
1.08917	1.00383	1.43465
0.919553	1.50638
1.30449	1.22632
1.27583	1.14164
1.1686	1.172	1.35859
1.04479	1.57233	1.23578
0.97001	1.329	0.889216
1.01852	1.22311	1.30442
1.01624	1.42879	0.917749
	1.07476
1.10782	1.28416	1.7406
1.21751	1.28029	1.46413
1.14217	1.26541	1.94664
0.948294	1.79462
1.60509	1.54954	1.4746
1.10479		1.31405
1.32035	1.26951
1.5958	1.56701	2.03456
1.5097	1.13296	1.27333
1.67039	1.54872	1.39433
	1.40379	1.30528
1.11288	1.63061	1.35108
1.32422		1.62492
1.16302	1.13812	1.50121
1.49888		1.28187
1.17056		1.34326
1.29321	1.55402	1.48885
1.02964	1.49191	1.52334
1.24788	2.08371	1.37721
1.49508
0.979881	1.29838	1.24789
1.28111	1.2852	1.43812
1.15769	1.38338	1.31779
	1.49918	2.1181
1.27647	1.53923	1.31108
0.924847	2.21254	1.34806
1.15127		1.36733
1.15968	1.32842	1.17796
1.11312	1.60063	1.41231
1.19905	1.33565	1.05247
1.13295	1.57286	1.77765
1.27066		1.07138
1.74277	1.46041	1.45145
	2.08387	1.87171
1.1216	1.43795	1.81814
1.32465	1.5303	1.46208
1.25237	1.44112	1.45991
	1.38073
0.928044	1.45741
1.03977	1.23495	1.17528
	1.40785	1.55021
1.39457		1.34098
1.23917	1.316	1.33961
1.31262	1.50182	0.957712
1.42507		0.912961
0.966418		1.50552
1.15629	1.39527	1.97393
1.19791		1.54199
1.06285	1.42364	1.27396
1.47802		1.20345
0.81862	1.66381	1.42228
0.95752	1.30792	1.81962
1.08506	1.77376	1.41379
0.993588		1.21188
1.21107	1.24859	1.42622
1.84767		1.48017
1.15042	1.595	1.21326
1.56999	1.37973	1.16339
1.13049		1.07734
1.28045		1.38294
	1.12816
1.10106	1.14162	1.31378
1.29462	1.09928	1.44519
0.940098	1.12822	1.16313
1.19183	1.35481	1.12399
	1.2737	1.45357
1.06711	1.50418	1.28275
1.6356	1.04098	1.09011
1.23783		1.41101
1.28419	1.26024	0.977728
1.40677	1.30178	1.46937
1.4136	1.17427	1.30656
1.08266	1.31274	1.54733
1.26114	1.2913	1.62658
0.964517	1.45063	1.15041
1.21841	1.662	1.34526
1.17356	1.34466	1.43679
1.12447	1.29974	1.14032
1.19627	1.47722
1.29001	1.36854	1.09396
1.04061	1.21892
1.21143	1.71436	1.0558
1.74512	1.27805	1.47339
0.873096	0.997825	0.977082
1.14059	1.20476	1.83629
1.1245	1.6585	1.20561
1.07487		1.16148
1.13713	1.52117	1.34719
1.35585	1.19108	1.49091
1.19939	1.18664	1.40911
1.02089		1.16056
1.15042	1.77562	1.6143
1.48686	1.35783	1.08679
1.04762		1.30986
1.25126	1.49718	1.45025
1.58154	1.3652	1.02121
0.933747	1.46666
0.994884	1.43023	1.32306
1.16858	1.33483	1.23751
1.44432	1.38682	1.47741
1.17906	1.07688
1.31903	1.14385	1.51963
1.06933	1.43311	1.49051
1.22576	1.37068	1.03499
		1.17925
1.25412		1.07807
0.880149	0.957352	1.48264
0.831541	0.975545	1.14041
1.06104	1.52428	1.7375
1.06192	1.27337	1.3721
1.20291	1.24938	1.30597
1.07322	1.14895	1.31526
1.46709	1.8201	1.25612
1.10514	0.914245	1.13144
1.35397	1.46962	1.62097
1.41208	1.55272	1.56702
1.07275	1.00093	1.47666
1.22973	1.59279	1.25636
1.08957	1.26771	1.19541
	1.19016	1.6476
1.46712	1.20351	1.2428
1.13171	1.2747	0.970193
0.889523	1.02689	1.3919
1.28509	1.81159	1.05303
0.865399	1.54002	1.23633
1.06378	1.50348	1.15384
1.22561	2.01473	1.67695
1.57048	1.23621	1.17466
1.17525	1.88618	1.44625
1.34137	1.87201	1.39961
1.01165	0.982815	1.45143
	1.39384	1.37194
1.46156	1.29311	1.00132
1.08314	1.49327	1.20631
1.3085
1.21148	1.47288
	1.29282	0.970769
1.35591	1.29398	0.860695
1.33448	1.53735	1.75356
0.939597	1.47592	1.19169
1.23513	1.29272
1.47031	1.36623	1.1539
1.20663	1.13121	1.397
1.08728	1.02535	1.15284
1.10748	1.05482	1.03095
1.18819	1.34663	1.85816
1.12135	1.40157	1.61837
	1.26614	1.04584
1.11242	1.0595	1.06025
1.35344	1.17174	1.39296
1.0107	1.46692	1.39166
1.74905	1.29092	0.995708
1.21805		1.20701
1.31009	1.42379	1.2254
1.10159	1.1107	0.979383
1.49738	1.215	1.27203
1.09879	1.23081	1.75992
1.07194	1.67495
1.18849	1.42294	1.13031
1.09666	1.18643	1.39199
1.25127	1.4563
1.29457	1.54863	1.44869
0.950067	1.76061	1.43849
0.874624	1.26623
	1.61032
1.22952		1.19479
1.41448	1.14957	0.996988
1.20071	1.26909
1.2635	1.30261	1.82199
0.966617	1.53758	1.16299
0.981366	0.978041	1.63579
1.03365	1.10253	1.39632
1.08772	1.61878	1.10409
1.30789	1.23317	1.25516
0.944205	1.15513	1.25575
0.989281	1.58168	1.19219
1.06261	1.41907	0.908415
1.08889	1.27904	1.29382
1.27066	1.37902	1.23163
1.08194
1.20879	1.45607	0.932699
1.50476	1.36724	1.32086
	1.17982	1.14025
1.12229	1.3309	1.01955
1.10018	1.44433
1.26947	1.10564	1.53664
1.18412	1.31767	1.12167
	1.32574	1.2868
0.835809	1.30894
1.48951	1.29926	1.69219
1.09145	1.45197	1.23267
1.35692	1.62377	1.25657
1.17076	1.39612	1.67883
	1.29346	1.05905
1.26199		1.3468
	1.04269	1.42034
1.2741	1.32633	1.38908
1.05457	1.40351	1.51552
1.13466	1.30387
1.15397	1.96498	1.26217
1.11825	1.20428	1.2843
2.00732	1.60368
1.51458	1.46522	1.70337
	1.7163	1.05266
1.02249	1.08871	1.54749
	1.47891	1.16476
1.11437	1.35333	1.42581
1.22033	1.51434	1.38023
	1.26057	1.40382
1.02841		1.15605
1.15899		1.48759
0.992641	1.27501	1.91977
1.41157	1.22506	1.37596
1.25275	1.5592	1.64244
1.69826	2.32151	1.06638
1.03938	1.11226	1.40644
1.42134	1.19787	1.4523
1.22553
0.995823	1.60234	1.32401
1.00748		1.44347
1.20031	1.2267	1.36332
1.34546	1.52972	1.35998
1.17999	1.32284	1.52737
1.03677	1.24708	1.29596
1.0642	0.975642	1.21997
1.09817	1.40402	1.16436
1.19247	1.16798	1.387
1.30539	1.41341	1.04806
1.84153	1.64619
1.25011		1.29569
1.57606	1.30367	1.29703
1.29765	1.42209	1.55783
1.20236	1.71005	1.26009
1.10156	0.930258	1.20091
1.1579	1.26794	1.48851
1.40159	1.34036
1.33956	1.37057	1.29998
1.44757		1.40978
1.29729		1.41375
1.18994	1.53178	1.41057
0.990278	1.03136	1.09988
1.27768	1.57228	1.32314
1.26045	1.21047	1.52295
1.32844	1.25154	1.50676
1.10683	1.29414	1.36829
1.08467	1.3278	1.5336
1.09911	1.6189	1.35138
1.09636	1.24525	1.48403
1.08403	1.09285	1.31215
1.21422	1.24046	1.28291
1.93564	1.25496	1.19238
1.22271	1.3985	1.05913
1.35401		1.53476
1.35398	1.86106	1.78713
0.99699	1.14033	1.4916
1.79071	1.53468	1.33269
1.34492	1.3841	1.27319
1.03872	1.39588
1.0499	1.07539	0.928743
1.00005	1.94214	1.45772
		0.860941
1.58442	1.24351	1.4517
1.64258	1.41214	1.05175
		1.07171
1.2093	1.46189	1.16787
	1.32401	1.74385
0.813701	1.32851	1.48808
1.02471	1.40108	1.25738
1.08204	1.10216	1.19939
1.20634	1.46853
1.25135		1.28669
1.16595	1.41737	1.40659
1.36738		1.64907
1.09281	1.27043	1.06067
1.83457	1.43085	1.29217
1.01575	1.30663	1.38849
1.81726	1.33467	1.08758
0.878544	1.17817	1.52322
1.14899	1.6197	1.403
1.33688	1.34416
	1.12869	1.46568
	1.67318	1.34716
1.87672	1.19926	1.17413
1.02023	1.09177	2.07211
1.13839		1.84999
0.948428	1.35511
1.46008	1.22498	1.3077
1.53409		1.20159
1.14627	1.58107	1.43777
	1.68205	1.4583
0.981633	1.28505
		1.44661
1.0331	0.894414	1.48807
1.15649	1.47141	1.22618
1.42411		1.25609
1.15996	1.49767	1.32989
1.13321	1.25629	1.41233
1.2383	1.23856	1.50185
1.24514	1.43073	1.05836
1.66809	0.87911	1.26733
1.2318	1.47924	1.48338
1.25685	1.33	1.10822
1.81982	1.04127	1.19032
1.69021		1.28251
1.11106		1.30471
1.53473	1.46212	1.41621
0.82934	1.35042	1.34857
1.22772	1.50889	1.50672
1.18323	1.20789	1.18003
1.42635	2.07481	1.0534
2.08501		1.31588
1.3919	1.21091	1.71885
0.968484		1.5051
	1.3653	1.70787
1.18375	1.36923	1.24939
1.25679		1.28197
0.843929	1.27698	1.12358
1.39233	1.08942	1.55746
0.889788	1.55846	1.56411
1.40686	1.44234	2.20814
1.27139		1.42926
1.07473	0.963568	1.21839
1.14752	1.17711	1.3034
1.36414	1.3443	1.2977
1.282	1.46101	1.02966
1.25851	1.07048	1.35713
1.27792	1.42393	1.42364
1.19504	0.933162
1.31503	0.996094
1.21669	1.20477	1.40049
1.4893	1.51885	1.50256
1.0569	1.14655	1.11237
1.24674	0.947434	1.32457
1.2814		1.43688
1.31821	1.16395	1.3634
1.24911	0.908636	1.32774
	1.72508	1.5711
1.29072	1.04553
1.09328		1.20271
1.79645	1.25594	1.52502
1.26287		1.13284
1.11714	1.19302	1.43969
1.82567	1.19038	1.23164
1.20163	1.01242	1.53651
1.361	1.76997	2.4808
	1.40557	0.984841
	1.30272	1.91682
1.26772		1.22768
1.20052	1.36077	1.22336
1.30726
1.20091	0.871805	1.13103
1.41955	0.924514	1.34809
1.39605	1.49405	1.13804
1.04134	1.70356	1.30877
1.24557	1.19699	1.19074
1.61476		1.50984
1.09172	0.895549	1.51696
1.18277	1.5133	1.18304
1.16833		1.44365
1.87495	1.13646	1.34018
1.0692	1.54781
1.44598		1.1811
1.12223
1.25383	1.44845	1.3886
1.04316	1.4726	0.974074
0.993517	1.50501	1.1231
1.27528	1.31697	1.51883
1.22383	1.68421	0.930246
1.07119	1.18238	1.95771
	1.01537	2.16202
1.06874	1.22003	1.2016
1.40007	1.92518	1.2148
1.37988	1.40871	1.27612
1.50385	1.25375	0.945437
		2.09902
1.09602	1.05076	1.43917
1.31853	1.37563	1.21091
1.43603	1.44899	1.05306
1.31088		1.38016
1.21459	1.79003	1.46037
1.79191	1.60072	1.07058
1.4247	1.44027	1.21751
	1.2517	1.46284
1.21022		1.14007
	1.09095	1.13336
0.867965	1.30161	1.26734
0.949483	1.00627	1.27242
1.40649	1.22599	1.45913
1.61897	1.08448	1.33023
1.43497	1.59184	1.29791
1.42368	1.68433	2.52248
1.43368	1.06372	0.886059
2.08139	1.53425	1.53006
1.27477	1.21284
0.819546	1.43431	1.09445
0.963143	0.955173	1.30974
0.852362	1.58444	1.62989
1.2349	1.2668	1.68662
0.989438	1.45396	1.09923
1.4012	1.46197
1.68731		1.07207
1.29344	1.41771	1.20434
1.00618	1.17871	1.5161
1.12607	1.40886	1.08335
1.29197	0.940445	1.29176
1.71474	1.1639	0.97491
	1.02561	1.2748
2.08081	0.900388
1.06072	1.17222	1.25718
1.08999	1.35227
1.07632	1.07942	0.926148
1.67913	1.08097	1.83602
1.42261	1.30591	1.02263
1.32028	1.10959	1.40567
0.882193	1.51598	1.33897
1.49053	1.14485	1.16435
1.11716	1.29283	2.02899
1.68991	1.33674	1.05398
1.46205	1.40963	1.45868
1.46984	1.95224	1.65681
1.3017	1.24728	1.35711
0.875152	1.27811	1.74643
1.32072	1.91655	1.34436
2.15594	1.48941	1.14717
		1.84175
	1.43787	1.7972
1.00566	1.6041	1.24138
1.25538	1.3225	1.07149
1.21379	2.41577	1.90539
1.43405		1.59084
	1.28386	1.08005
1.62166		1.56372
1.0947	1.41238	1.79869
1.51478	1.46028	1.24903
1.10224		1.60512
1.30587	1.24664	1.09922
1.3224	1.46341
1.10386		1.90292
0.938321	1.08841
1.12726	1.25523	1.73457
1.53001	1.36586	1.45257
1.18953		1.24236
1.3263	1.20485
1.13352	1.34932	1.57619
1.15165	1.33978	1.31052
1.24533	1.17429	1.07479
1.51998	1.49902	1.342
1.1479	1.99657	1.59644
1.1303	1.56061	1.44031
1.22499	1.38509	1.35093
1.18497	1.38713	1.29891
1.29242		1.34178
1.60066	1.38414	1.9425
1.16904	1.21436	1.12166
1.36549	1.201	1.08501
1.03955	0.938662	2.32593
1.05568	1.17133	1.16006
1.08994	1.10821	1.82
1.43218	1.50846	1.59042
1.08639	1.39941	1.48715
1.30385	1.2579	1.29726
1.14367	0.898698	1.49893
1.22652	1.41089	1.36786
1.17282	0.91443	1.57127
0.816842		1.00097
1.32766		1.88826
0.941448	1.33024	1.48231
	1.22819	1.60901
	1.5629	1.5414
1.33371	1.45091	1.38969
1.4611	1.54907	1.21155
1.1533	1.42358	1.25668
1.05331		1.41684
1.06502	1.39438	1.37766
1.11764	1.56773	1.44883
1.16527	1.37974
1.10227	1.37649	1.19571
1.08948	1.63709	1.5355
1.61424	0.94247	1.66206
1.07675	1.40305	1.22846
1.03232	1.18193	1.69107
1.13475	1.63647	1.53121
1.4522	1.31439	1.12165
1.63026	1.08585	1.19157
1.58695	1.28433	1.22542
1.623	1.10809	1.49955
0.889574	1.01201	1.81543
0.815052	1.15053
1.25296	1.47435	1.29791
1.50921	1.54488	0.985243
1.85244	1.93001	1.75893
0.994014		0.940733
1.58878	1.07179	1.15291
1.29012	1.40212	1.43742
1.46325	0.979622	1.62405
	1.5815	1.40914
0.805724	1.41736	1.86106
1.24066	1.10144	1.57128
1.07456	1.04891	1.50921
1.05728	1.39828	1.45442
1.63707	1.78767	1.21485
1.05907	1.28275	1.83621
1.41215	1.31172	1.23382
1.14257	1.42011
1.11053	1.62596	1.19652
1.20263		1.34165
1.51536	1.1792	1.35705
1.34697	1.09701	1.3234
1.04001	1.13418	1.27081
	0.972454	1.7312
		1.22974
1.72559	1.33797	1.78902
0.999716	1.28208	1.32258
1.19769	1.33794	1.48425
0.955397	1.46286	1.57762
1.10644		2.10507
1.65051	1.43209	0.986711
1.04445	1.45721	1.24601
1.25004	1.16095
1.38057	1.26011
2.23521		1.08703
1.39513	1.46621
1.34516	1.08456	1.40735
1.59114	1.11269	1.33557
1.12254		1.04774
	1.15757	1.05866
0.94218	1.28389	1.36495
	1.43619	1.16975
1.40839	1.38499	1.37585
1.20842	1.00415	1.80024
1.09853	1.19721	1.11233
0.865732	0.972977	1.36319
	1.10791	1.31258
0.986669	1.54473	1.57655
1.08593	1.59113	1.67059
1.63515	1.06483	1.18314
1.28649	1.41333	1.24691
1.69322	1.24462	1.19251
		1.48426
1.51765	1.22673	0.882407
1.32753	1.17914	1.41842
0.943912	1.06438	1.56406
1.40537	1.33902	1.7551
1.23974	1.10511	1.82304
1.1416	1.39064	1.53399
1.1296	1.43652	1.39003
1.33661	1.29727	1.18599
1.04651	1.20173
0.943603	1.5589	1.29948
1.35654		1.6633
1.49249	1.30431	1.71146
1.40528	1.46684	1.15665
1.6898	1.31298
1.31577	1.22215	1.4825
1.33671	1.54305	1.24079
1.25969	1.21523	1.45143
1.18977	1.46793	1.03055
1.05546	1.31448	1.35199
1.20763	1.15259	1.13572
	1.64867	1.34467
1.42071	1.43704
1.455	1.53982
1.89707	1.18711	1.30799
1.40412	1.09835	1.06252
1.33494	1.76652	1.17552
1.54637	1.05624	1.56258
1.50868	1.37961	1.22524
1.35476	1.25765
1.0425	2.53696	1.57831
1.28224	1.00494	1.30667
1.39503	1.56151	1.60967
1.47756	1.36743	1.3207
0.926015	1.35938
	1.21904	1.24287
1.2874	1.37425	1.45685
1.15565	1.26312
1.4082	1.09451
1.16112	1.22491	1.0738
0.908561		1.51659
	1.66528	1.90022
0.99797	1.31298	1.16735
1.11243		1.42759
1.18289	1.17572	1.70202
1.14798	1.37701	1.36597
1.29379	1.49495	1.32086
1.13526	1.2156	1.10439
0.99456	1.12172	1.28784
0.948024	1.1547
1.12816	1.09324	1.6685
0.932094	1.45917	1.41346
1.45475	0.968714	1.85884
1.31789	1.16544	1.20766
1.16915	1.53872	1.76798
0.985784	1.53343	0.953162
2.11867	1.05948	1.5207
	1.18745	1.7127
0.963774	1.44519	1.47078
1.28662	1.31464
0.913418	1.65478	0.904513
1.34193	1.25017	1.32544
1.45072	1.39218	1.27099
1.0609	0.944931	1.6093
0.895761	1.09415	1.34114
	1.26183	1.11271
1.01797	1.62333	1.417
1.46086		1.44802
1.49776	1.45126	1.28441
1.04819	1.69263	1.41955
1.23454	1.44488	0.994697
1.18985	1.62808	1.26959
1.11727	1.20619	1.55371
1.34786	1.52554
		1.04209
1.03831	1.40433	1.28702
1.03581		1.40419
0.899431	1.65804
1.16813	1.29287	1.30523
1.5337	1.25114
1.70579	1.71449	1.7144
1.16265	1.15922	1.25461
1.22394	1.54631	1.31783
1.64764		1.29975
0.962199	1.14737	1.09923
	1.67275	1.65993
0.887189	1.14134	1.33617
2.24424	1.41963	1.94388
1.53881	1.90313
1.25518	1.288	1.02541
1.22715		1.74434
1.19642	1.15463	1.51295
1.1804	1.00832	1.57561
1.21458	1.48657	1.59876
1.32692	1.66957	1.0013
1.23226	1.38238	1.43521
0.926081		1.50555
0.953185	1.49814
2.26269	1.01003	0.974388
1.00904		1.36809
1.05573	1.191	1.47074
1.55947	1.43521	1.44773
	1.19155	1.09981
0.9269	0.829986	1.22835
1.06313	1.15303	1.5767
1.16644	1.62373	1.61918
1.29387	1.41958	1.58229
0.93613		1.67509
1.10835	1.8925	1.14361
1.09634	1.14497
0.914389	1.10213	1.82781
	1.13835	1.67288
	1.45051	1.28955
	1.33057	1.01507
1.11699	1.2595	2.22183
1.12559	1.36223
1.12811	1.1319	1.17704
1.13274		0.965732
1.69476	1.20076	1.27285
1.12086	2.1523	1.49578
	1.53389	1.50346
1.03717	1.49233
0.899768	1.4523	1.26479
2.19256
1.02792	1.0945	1.86098
0.941559	1.25499	1.35606
1.12102	1.27069	1.24729
	1.31384	1.98863
1.1256	1.52699
1.21363		0.897249
1.0558	1.46075
1.12588	0.914215
1.30957	1.44709	1.48395
1.40199	0.949626	2.35522
2.13945	1.46454	1.27536
1.10273	1.19634
1.30891	1.24777	1.01017
1.15718	1.22528	1.81643
1.21502	1.07968	1.64156
0.901405	0.878539
1.30961	1.28492	1.55778
1.08354	1.31472	1.34743
1.12928	1.54488	1.25507
1.25931	1.38972
1.08961	1.38401
0.975144	1.00691	1.28089
1.32425	1.46115	2.18335
1.3049	1.51248	1.41372
1.78568		1.15952
1.46864	1.22822
1.00499	1.48597	1.26098
0.886861	1.3954	1.20469
1.30933	1.13226	1.13769
1.76935	1.43745	1.23437
0.968357	1.40406	1.44274
1.07375	1.64147	0.901781
0.973987	1.47139	1.39545
1.12343	2.56428
1.38831	1.3774
0.922095	1.45957	2.36578
1.09086	1.10979	1.41844
1.27324	1.39689	1.15927
1.2545	1.13271
1.43159	1.07362	1.7443
1.21348		1.17016
1.12837	1.33543	1.23481
1.06511	1.40398	1.45552
1.41795	1.39038	1.40024
1.0226	1.01583
1.29739	1.26431	1.62027
1.15674	1.03352	1.53037
1.0926	1.29621	1.46849
1.32304	1.19182	1.56369
1.01202	1.23442	1.57609
1.5143	1.03856	1.79588
0.932605	1.287	1.72491
1.42765	1.4087	2.26489
	1.17013	1.36088
1.16412	1.12635	1.28911
0.816465	1.546
1.77764	1.39847
0.95396	1.25828	1.36444
1.02156		1.2596
1.26552	1.85167	1.5237
1.25816	1.56721	1.39909
1.16524	1.82463	1.3714
	1.50121	1.11763
0.933079	1.12351	1.78155
	1.30738	1.03246
1.156	1.43808
1.37047	0.993283	1.52313
1.13092	1.24928	0.964562
0.904655	1.17835	1.53555
1.1361	1.37178
		2.6339
0.934148	1.08068	1.34644
1.34893	0.972428	0.990086
1.01074	1.32369	1.13907
	1.23621	1.23093
1.27585	1.31463	1.39917
1.02402	1.15724	0.948191
0.843075	1.13607	1.86211
1.81207	1.57141	1.03994
1.03861	1.50849
1.376		1.68182
0.999324	1.48237	1.30828
1.20398	1.21458	1.70745
1.10525	0.971039
1.42121		2.02216
1.48064	1.43321
1.13558	0.952524	0.985901
0.916525	1.27114	1.34765
1.32292	1.05907	1.32167
1.29272	1.64772	1.05949
1.26785	1.17168	1.22592
1.31912	1.10729	1.22896
1.16371	1.23917	1.30981
1.34579	1.48803	1.36164
	0.837076	1.54539
1.21216	1.7658	1.16939
1.27134	1.01436	1.40712
1.23472		1.2188
0.950603	1.40388	1.58273
	1.50183	1.24963
2.06853		1.90082
1.23145	1.50869	1.18996
	2.20947	1.55807
1.22295	1.29281	1.3406
1.0352	1.59954
1.45949	0.855702	1.06392
1.87187	1.4134	1.28697
1.33169	1.02745	1.02536
1.23671	1.38964	0.971568
		1.06988
1.83551	1.10739
1.23316	1.12504	1.07463
1.04891	1.45247	1.34602
1.13593	0.954476	1.44497
1.26339		1.02632
1.12285	1.97312	1.3909
1.24227	1.27059	1.67039
0.999339	1.44081
1.39388		1.26113
1.25687		1.44833
1.00265	1.06206	1.18812
1.54309	1.08862	1.48717
1.53122	1.28002
1.31364	0.90718	1.53362
1.24181	1.01742
		1.32487
1.24587	1.53057	1.31589
1.10457	0.890842	1.07344
0.859764	1.11617	1.35843
1.08409	1.32368	1.07653
0.851989	1.0828	1.08612
1.14423	1.15834	1.29695
1.06881	1.49453	1.5007
0.952146	1.4632	1.12668
0.907135		1.46112
0.86058	1.38778	1.47223
1.3841	1.06689
1.29189	1.48489	1.32318
1.20662	1.09481	1.86117
	1.20788
1.34583	1.2352	1.31739
	1.20278	1.35442
1.3876		1.38598
1.33909	1.29477	1.47992
1.05027	1.58714	1.21787
2.18782	1.32432	1.25191
1.20947	1.40917	1.27902
0.878406	1.14512	1.14113
0.940297	1.12646	1.42119
1.37459	1.29792	1.28255
		1.14566
1.19933	1.35978	2.5479
1.14926	1.30167	0.925512
1.14052	1.46926	1.1254
1.48557	1.57734
1.04628	1.00914
1.01299	1.42665	1.37925
1.04076	0.968195	1.74535
1.07682	1.24573	1.06794
1.1522	1.38457	1.22747
1.56309	1.41866	1.64134
1.30104	1.06204	1.52874
1.17542		1.4925
1.22557	1.42342	1.58623
0.965688	0.862804	1.31232
1.13939		1.31496
	1.2564	1.45426
1.2601	1.36268	1.37967
1.46486		1.58451
0.969354	1.81287	1.12426
1.83287	1.22805	1.41257
1.26593	0.995227	1.53475
0.980978	0.974241	0.875069
1.15668	1.59411	1.40233
1.20911		2.24074
1.3796	1.35933	1.23895
	1.48526	1.48426
1.05409	1.31253	1.19553
0.816356		1.26504
1.20033	1.28269	1.36924
1.38706		1.34679
1.08973	1.26816	1.77451
1.05941	1.26292	1.81093
1.2233	1.08506
1.26529	1.1809	1.7315
1.3231	1.36306	1.34522
1.02562	1.69552	1.63808
1.19515	1.38253	1.39176
1.38768	1.11828	2.39473
1.29443	1.08009	1.14777
[truncated: 273 more rows]

## Sheet: TFEB_ENDO 30min ins response 
TFEB_ENDO; 30min ins response
media	200ngINS	10ugINS
		1.01838
1.02397
1.17099	0.761115	0.926428
	0.992875	0.943561
	0.847185	0.968468
0.840294	0.799336	0.966937
0.991867	1.09122	0.992132
1.09952	0.913663	1.00719
0.944405	0.906003	0.724002
0.968885	1.16989	1.02859
0.913803	0.918423	0.735786
0.889997	1.0092	0.816197
0.87335	0.755146	1.09716
0.934132	0.950904	0.896043
0.823009	0.938876	1.00212
0.96977	0.876085	1.04747
	1.04582	0.878745
0.904362	1.09846	0.947403
	1.03268	0.946929
0.880439	1.03135	0.911048
0.906482	1.00699	0.910366
0.953826	0.82496	1.11627
0.878022	0.912955	0.879454
0.98783	0.963847	0.910802
0.802439	0.892179	0.734606
1.10294	0.828695	0.909019
0.853374	1.01048	1.08554
0.717288	0.887967	1.0187
0.978011	1.1135	0.731569
0.872666	0.880036	0.90718
0.94396	0.916608	0.939171
0.838075	1.0723	0.952739
0.888872	0.984922	0.812675
1.1046	1.09843	0.786139
1.01452	0.82918	1.05101
1.12594		0.804309
0.848565	0.857418	0.947605
0.891282	0.794517	0.942309
0.915632	1.03201	0.988663
0.772487	1.05541	0.99337
1.13744	1.13465	0.857743
1.09546		1.16772
1.06998	0.934999	0.846665
0.879973	1.05024	1.19425
0.949833	1.01142	0.999589
	0.952479	1.00123
0.686745	0.988902	0.920381
	1.11251	1.01758
	1.12176	0.875655
0.787135	0.84623	0.90447
0.748566	1.06526	0.872919
	0.992145	1.15323
0.821755	1.01628
0.90506	0.976375	0.96274
0.783864	1.0543	0.762929
0.806522	1.02765	0.788941
0.858575	1.10019	0.817268
1.23393	0.806046	1.08712
0.660438		0.850893
0.953493	0.94464	0.961717
1.04317	0.771992	1.10031
	1.14308
0.900245	1.04664	0.717214
0.772705	1.11803	0.888042
0.696365	0.910813	0.838577
0.711842	1.05551	0.934329
0.87271	0.917893	1.03177
0.956519	0.924424	0.72065
1.1969	1.21131
0.923333	0.919065
0.901292	0.859159	1.14266
0.842777	1.06497	0.889379
0.952933	1.22267	1.16237
0.879111	0.962027	0.922095
0.812482	0.980846
1.03543	0.983653	0.826044
0.959849	1.15436	0.947355
0.744667	0.885414	0.777254
0.834134	0.933119	0.732215
1.10228	1.01237	1.10329
0.763599	0.779846
0.750437	0.890199	0.89268
	1.14296
	0.9196	0.790941
0.929192	1.02391	1.04487
0.962153	0.745631	1.03441
0.702142	0.726442
1.01193	0.762869	1.1629
0.788264
	1.00951
0.859265	0.905534	0.885879
1.04273	1.03397	0.976486
0.933701	1.12071	0.837455
0.908651	1.06609	0.921394
0.918459	0.964613	1.04412
0.961687	1.08758	1.10184
0.792412	0.867361	0.992213
1.02101	1.06256
0.705885	0.974809	0.981692
0.854142	0.892681	1.32109
0.969667	0.961321	0.991967
0.822314	0.865387	1.15683
1.02863	1.17096	1.01397
1.11778	0.884232	0.947101
0.837497	0.787912
0.962829		0.965467
1.0159		0.935209
0.830743	0.871509	0.970711
0.784421	0.838652	0.824901
0.761134	0.897615	0.925126
0.993859	0.960783	0.925951
0.927538	0.942226	0.988511
1.01485	1.12055	0.828858
1.03386	0.99263	0.805111
0.89178	1.01618
1.03514	0.905496
1.05158	0.969578	1.10422
	0.967812	0.886029
0.839084	0.909018
0.759057	1.12478
	0.838831
0.993623	1.11807	0.817057
0.802052		1.12468
1.07433	0.994831
0.834869	0.92279	0.773196
0.791768	0.942675	0.801955
0.745953	0.874431
0.929044	0.957911	0.91762
0.690429	0.967346	0.811539
0.822277	0.756915	0.876552
0.917422	0.857123	0.934062
	0.941364	0.817771
0.814892	0.986329	1.00231
0.829643	0.894614	0.939298
1.06025	1.14517	0.774074
0.869927	0.909231	1.03227
0.817435	0.717191	0.91802
0.736486	0.780436	0.980926
0.916055	0.89603	1.1521
0.919017		1.07066
1.08327	1.0627	0.968453
	0.853428	0.903293
0.786536	0.777677	0.805833
0.901759	0.924494	0.985626
0.911007	0.984193
0.931592	1.02014	1.03967
0.835242	0.773251
0.974334	0.865463
0.80067	0.941844
0.825998	1.11036
1.00766	1.06308	1.01311
	0.928626	1.13109
0.731711	0.929858	1.07048
0.711362	0.919103	1.12431
0.993253	1.07598	0.844786
	0.947522	0.981247
1.05769	0.911713	0.872553
0.840746	0.949993	1.02578
0.805559	0.745241	0.77413
	0.924428	1.01719
0.970428	0.971881	0.959409
0.934309	0.842402	1.02277
0.909029	0.824364	0.729577
1.01492	0.963952	0.891754
0.825574	0.801785	1.17401
0.678362	0.871031	1.03015
0.985356	0.741373	0.756306
0.884921	0.837004	0.875107
0.857511	0.784764	1.02462
1.12242	1.08682	1.01621
	0.965513	0.906642
1.01783	0.756657	0.838835
1.07711	0.907536	0.944494
0.966375	0.911628	0.835191
1.28221	0.759489	0.844489
0.965931	0.859504	1.0116
0.857765	0.854223	1.08771
	0.924598	0.976449
0.907507	1.00065	1.01126
0.995752	1.15966	0.831686
1.14771	1.20488	0.902575
0.939719	0.946967	1.03175
0.90295	0.892838
0.747109	1.1128	0.933357
0.853246	0.907666	1.08546
0.76293	1.24823	0.950369
1.11069	0.996514	0.90987
1.13737	0.965904	0.976318
0.940806	0.993608	0.933884
0.890546	0.795812	1.00216
0.939356	1.18919	0.852219
0.996814	0.778514	0.869582
0.894737	0.876689	1.33043
1.00525	0.850083	0.919285
0.952364	1.1775	0.968087
0.859327	0.921504	0.899177
0.963105	0.906244	1.12013
1.106	1.02286	1.08998
1.26438	0.844922	1.11029
0.929131	0.990635
0.89008	0.839642	1.12134
1.06288	0.905165	0.993253
0.867995		1.28359
0.765721	1.01518	1.04819
0.828379	1.06369	0.878835
1.09215
0.919282	1.00541	1.07298
0.834021	0.961792	0.908223
0.806692	0.881455	0.952823
0.884674	0.866573	1.13694
0.753716		0.986546
0.854277	0.830712	1.19424
0.84739	0.89326	0.797822
0.860464		1.0346
0.927353	1.00505
0.999679		0.733868
0.710242	1.096
0.864924	0.98822	0.961536
0.779542	0.845651	0.934905
	1.23579	0.790606
0.905805		0.751272
0.948613	1.23419
1.22351	0.883549	0.7836
0.878929	0.787537	0.787848
1.05227	0.974406	0.93516
0.921957		0.921271
	0.819999
0.933178	0.834203	0.766339
0.993639	0.9253	1.06125
1.11142	1.04271	1.05906
0.897408		1.0384
0.797097	0.788254	0.815419
0.817489	0.944142	0.961992
0.956588	1.18624	0.929087
0.921793	0.894076	0.746522
1.09479	0.868934	1.06145
0.874211	0.996494	0.888865
0.947633	0.789121	0.803725
1.16162	0.905847	0.878148
0.946895	1.01886	1.04514
0.805559		0.89572
0.687048	0.921946
0.968885	0.947821	0.68985
0.92511	0.873994
0.902109	0.867942	0.872703
0.984789	1.1035	0.816517
0.893789	1.01645	1.1454
1.01322	0.966397	0.855669
0.814815	1.0078	0.833184
0.849019	0.87151	0.955728
0.951298	0.799423	1.13788
0.811196	0.913823	1.0275
0.970037	0.932466	0.890131
0.766304	0.920728	0.875405
0.818787	0.953032
	0.886918	0.980093
1.04648	0.998393
0.853779	0.906873	0.857152
0.713744	1.05312	1.11307
1.00949	0.878516	1.07088
0.904901	0.779834	1.1418
0.894589	1.00203
1.04084	0.765623	0.922037
0.711171	0.861568	0.863885
1.07261	1.00517	0.992565
0.74607	0.913324	0.743367
0.85131	0.870657	1.05702
1.099	0.984842	1.20925
0.850197	0.707297	1.14416
0.74341	0.811727
1.11654	1.01004	0.979522
1.16759	1.11667	1.1529
0.869291		1.00127
0.878368	0.836607	0.905169
0.76778	1.02261	1.07574
0.801751		0.828315
1.00979	0.907063	1.08973
1.10048	1.09246	0.797119
1.10923	1.03292	1.06294
0.911661	0.901507
1.11869	0.92628	0.963907
0.753946	0.975461	0.750356
0.727269	0.896902	0.97
0.919532	0.922511	1.08631
0.978728	1.25849	0.70881
0.992269	1.06905	0.901166
1.0885	0.880695	1.01776
0.814842	0.933335	0.915307
0.864736	1.00475	0.98231
0.944944	0.815809	1.09966
0.981177	0.877106	1.01144
0.943889	0.775057	1.03055
1.03029	0.973822	1.00552
0.790961	0.97557
0.880178	0.802305	0.845535
0.812981		0.890829
1.03825	0.838321	0.933876
0.879465	0.817844
1.03002		1.06841
1.05301	0.858424	0.864449
0.820454	0.793426	0.955368
0.994736	0.835234	0.964931
0.914518	1.2643	0.972594
0.882185	0.926341	0.960437
1.13677	0.954623	1.06929
0.73319	0.803895	0.70658
0.935938	0.988504	0.784718
1.05049	0.831344	1.04593
0.90249	0.946445	1.00437
0.913032	1.10151	0.843415
0.974869	0.982203	0.998854
0.801531	1.01491	1.07763
0.995347	1.0257	0.992707
1.30713	1.03715	0.725493
0.999378	1.03181	0.925087
1.05631	0.982095	1.1122
1.22735	1.06234	1.02845
0.954787	1.00473	0.975031
1.14421	0.90586	0.821952
0.980124	0.864803	0.794153
0.989801	1.03004	0.85985
0.834586	0.775022	1.00259
0.937375	0.747006	1.08738
0.890936	0.753269	1.1243
0.986568	0.804103	0.827185
1.02436	0.96349	0.956039
0.961744	1.01597
1.0327	1.17078	0.90463
0.799851	0.9085	1.06077
	1.09701	1.17517
0.950146	1.0936	0.998921
1.09245	1.00653	0.832126
0.828536	0.93212	0.902222
0.975022	1.06138	0.977658
1.05528	0.996321
0.740079
	1.01618	0.995879
0.821444	0.890062	1.07289
0.91019	0.979635	1.01854
1.07681	0.771489	1.05635
0.653948	0.940227	0.844571
1.28086	0.955555
0.852076	0.902766
0.842355	0.889574	1.27054
	0.828707	1.0739
	1.06197	0.877648
0.938698	0.960907	1.03483
0.656884		0.879975
1.00821	0.993902	0.712756
0.650195	0.882323	0.928169
0.912969	0.899587	1.07304
0.864516	0.704875
0.923198	0.865431	0.967164
0.828053	0.85891	1.18142
0.852913	0.891878	0.889941
0.656366	0.859369	0.945174
1.07212	0.830835	0.768876
0.710748		0.999355
0.866461	1.13777	0.887921
1.00358	0.883881	1.08241
0.692664	0.970961	0.963764
1.01	1.01078	1.1507
0.996294	0.943932	1.01046
1.24514	0.823739	0.955867
0.767199	0.933689	0.78588
1.02814	1.21876	0.899679
0.840636	0.874802
0.787226		0.793633
1.13054	0.967024	0.898946
1.1069	0.799909	0.954678
0.973811	1.15277	0.772192
0.840033	0.85269	0.746866
0.831671	1.22406	0.826738
0.993592	0.848824	0.877069
0.947367		0.859403
1.04542	1.10464	1.06608
0.797149	0.88035	0.991593
0.826201		0.851155
1.02837	0.886454	1.03817
0.789693	0.796036	0.940992
	0.931878	0.915794
0.745924	0.855216	0.938792
0.684584	0.795378	0.910921
0.861338	0.92473	0.854819
0.657292		0.881661
0.894093	0.982781	1.12358
0.899514	0.883608	0.97825
0.744752	1.03963	1.33191
0.970963	0.938985	0.845465
0.841978	0.733671	1.01669
0.817198	0.978835	0.862483
0.898985	0.927442	0.97702
0.777001		1.1071
0.815527	0.957707	0.891587
0.924429	0.822443	1.03934
	0.701176	1.16436
0.762472	0.914476	1.00503
1.12692		1.13197
0.664268	0.957495	0.798
0.997015	1.15599	1.16111
0.90085	0.860708	0.883774
0.936508		0.689938
0.990348	0.749971	0.88856
1.02293	0.796268	0.803777
0.787086	0.937416	1.01293
	1.06895	0.866423
0.862151	0.995514	1.10256
0.687493	0.991118	0.965868
0.85384	0.985488	0.919599
0.806485	1.10997	1.143
0.649028	0.978967	1.01184
1.01509	1.00791	0.816231
0.972191		1.11574
0.696601	1.02959	0.799824
0.742581	0.797824	0.907851
	0.833283
0.643904		0.805793
0.868985	0.702427
0.907976	0.843014	1.03571
0.862391	0.807062	0.805282
0.830452	0.988206	0.944441
	1.15181	0.933327
1.11582	0.7774	0.723317
1.01584		1.24174
0.652062	0.971125	0.958249
1.07358		0.94021
0.853367	0.698815	1.20877
0.870613	1.0846	1.08364
1.03859	0.811728	1.04657
0.80878	0.966243	1.01892
0.99435	0.813815	0.970469
0.685034	0.833403	0.942615
0.77763	1.05519	0.999755
0.64768	0.933881	0.871182
1.01633	0.816953	0.870091
0.909422	0.771309	0.956092
0.707461	0.876775	0.946773
	1.11316
0.705198	0.986367
0.996357	0.924283	1.0267
	0.977532	0.924479
1.1554	0.791822	1.03903
0.909786		0.928156
1.14294		1.02399
0.868657	0.964688	1.08578
0.903438	0.818223	0.908831
0.836495	0.929444
0.927381		0.838748
0.694304	0.856157	0.992753
0.909889	0.810892	1.04082
0.78745	0.910904	0.8774
0.990571		0.787793
0.770881	0.859375
	0.867505	1.00492
0.964903	0.855378	0.795628
	1.01404	0.871846
0.912185		0.859841
1.1548		0.986144
		1.0738
0.911788	0.941977	1.00243
	1.06877	0.890116
0.819181	0.893383	0.919618
1.15612	0.854813	0.971596
0.765886	0.837272	0.979674
0.775801		0.720323
0.832415	0.975477	0.903645
0.694876	0.998156
0.786618	0.774143	1.04322
0.912466		1.01436
	0.901748	0.963689
0.989877	1.04563	1.23229
	1.0248
1.29874	0.795039	0.9434
0.854873	0.9231	1.05359
0.797644	1.04759	0.781314
0.82048		1.03684
0.909404	0.822566	0.902288
	0.965262	1.10451
0.714591	0.874517	0.84624
0.878425	0.819153	0.921025
0.649041		1.05488
0.685608	1.00371	0.906128
0.916084		0.97063
0.842503	0.737986	0.961378
0.981607	0.987067
	1.10068	1.06654
0.887966	1.0069	0.993704
		0.806955
0.814303	0.762129	0.976498
0.80722	1.05471
0.779023	1.01994	1.07936
0.83612	0.84906
1.06931	0.911703	0.882696
1.17793	0.862211	0.901928
0.724374	1.03503	1.03388
0.857006	0.860773	0.851705
1.01998	0.80068
0.756267	0.94144
0.944992	0.707996	0.917001
0.790267	0.863586	1.14451
0.854118	0.905904	1.19548
0.867208	1.13479	0.846176
	1.02512	1.00947
0.723329	0.828292	1.02562
	0.700105	1.21942
0.794433		0.920713
0.789797	0.974353
0.893018		0.945981
0.899664	0.990163	0.897051
0.874252	1.08162	1.02593
0.65575	1.0115	0.833425
1.05838	0.760975
0.735978	0.9482	1.13075
1.03111	0.971773
1.07171	0.819883	0.782033
	0.909467	0.941245
1.03442	0.813638	1.05246
0.872991	0.988038	0.978384
1.1173	0.825128	1.21108
0.79972	0.884203	0.933415
0.762885	0.910366	1.12013
0.82477	0.969238	0.872887
0.751841	0.906643	0.907811
0.862186	0.79297	0.700497
0.800847	0.988707	0.812256
0.96187	0.976282	1.00946
0.865835	0.827504	1.08114
0.978666		1.03537
0.790954		1.314
1.04296	0.932914	0.733926
1.15046	1.03706	0.910793
1.08872	0.879683	0.989488
0.904155	0.717114	1.29544
0.911026	0.913645	0.907761
0.84887	0.733041	0.969729
0.905262	1.03083	0.87469
0.941754	1.21297
0.982964	0.864279	0.818062
1.06752	1.08584	0.82653
0.838444	1.26631	1.10211
0.880717	0.923555	1.0154
0.84797	1.07328	0.790981
0.786473	0.988337	0.871007
0.96622	0.906392	1.11557
0.767725	0.812336	0.940006
0.977854	0.878145	1.10409
0.846318	0.791546	0.875165
1.08641	0.818908
	0.830991	1.08251
0.951495	0.744544	1.03166
0.9775	1.00244	0.78072
0.764728	1.05151	1.1617
0.87039	0.90008
	0.90413	0.950219
1.31635	0.878108
0.985772
0.968848	0.76104	0.769619
0.751871	0.885704	0.854276
0.799658	1.06049	1.05836
0.894541		0.849022
1.03674	1.03877	0.934219
	0.920736	0.871186
0.976093	0.766468	0.937988
0.86763	0.970819	0.898042
0.993867	0.785795	0.854108
	0.802179	0.900835
0.968092	0.719478	0.973893
0.904938	0.798986	1.05553
0.951782	0.993302	1.10142
0.810621	0.975134
0.9742	0.911445	1.06299
0.671891	0.785961	1.04433
0.880655	1.11648	0.995334
0.95746	0.915769	0.915103
1.02558	0.853051	0.848211
0.85527	0.846183	0.969322
	0.967858	0.848146
0.730075	0.875079	0.74698
0.893719	0.87735	0.929031
0.980012	1.06068	0.998642
1.00234	1.06542	1.20831
0.881668	0.895345	1.13615
0.753738		1.11601
0.872096	0.802516	1.04601
	0.857855	0.886698
1.04444	0.847409	1.02973
0.867445	0.910991	1.08478
0.939034	0.997104	1.1348
1.26915	1.00068	0.799698
0.760253	1.19551	1.03056
0.882712	0.90238	0.999734
1.01432	0.999551	1.11145
0.877977	0.922607
1.0147	0.753258	1.02679
1.04728	1.02187	1.28278
0.890078	0.911239	0.921978
1.08129		0.77685
0.960469		1.06096
0.865377	0.913909	0.759971
0.817939	0.697142	0.795577
1.1794	0.938369	1.31298
0.824817	0.731326	1.02167
0.854459	0.86039	1.18599
0.970522	1.11518	1.05665
	0.983575
1.0819	0.886846	0.888161
0.765227	0.824414	0.704583
0.92083
0.923313	0.775911	1.15033
0.881103	1.08098	0.890775
	0.817434	0.763658
1.01114	0.851513	0.879433
	0.934866	0.952079
0.857842	0.976403	0.892401
0.867647	0.909892	0.824412
0.964908	1.06584
1.05789	0.891783	0.940067
0.837901	0.906527
0.890141	0.702151	1.1139
1.04979	1.10085
0.861398	0.97437	0.699128
0.986975	1.05268
0.847071		0.957635
0.945178	0.961045	1.13242
0.925545	0.738717	1.21105
0.920894		1.12232
0.907146	0.966533	0.935758
0.917936	1.0974	0.835935
0.987793		0.91395
0.933805	0.781287	0.972682
0.878019	0.868462	0.836384
0.909707		1.02757
1.08125	0.702978
1.10708	1.25435	1.01048
		0.836692
1.00205	1.0278	1.0018
0.883941	1.00705	0.904554
0.788354	0.935358	1.05662
1.04445	0.730516	0.913626
0.944892	1.013	0.863606
1.10059	0.748005	1.15556
1.04817		0.964216
0.996931		0.967082
1.0444	1.09315	1.05013
1.09283		1.074
0.781682	0.708946	0.953708
1.11181
0.948617	1.03056	0.748645
0.819808	1.00049	1.08482
1.0408	0.912287	0.71855
0.991719	0.846022	1.02909
0.757819	0.892644	1.08658
1.04294	0.831134	1.19258
0.796624	0.973643	0.887834
1.23033	0.904243
0.933055		0.717441
	0.952714	0.866642
1.04922	0.903131	1.1615
0.837203	0.97366
0.747401	0.859116	0.919658
0.754603	0.799377	0.970036
0.820663	1.00697	0.768431
0.904755	0.868706
0.986027	0.824231	1.11407
0.922239	0.950938	0.941515
0.876166		1.04502
0.903626	0.787761	1.11487
0.931183	0.969405	0.998837
0.961564	0.825552	0.856709
0.933809		0.833713
1.01866	0.857985
1.18355	0.721692	0.960272
1.06048	1.06351	0.913231
0.872689	0.923293	0.823604
0.891793	0.873002	0.838292
0.906952	0.866175	1.03476
1.20211	0.861247	1.08625
0.850157	1.02258	0.960902
	0.784043	0.927064
0.980548	1.11858	1.08156
0.908256	0.827946
0.712109	1.05597	1.08084
0.839175	0.807279	0.979218
0.8492	0.930637	0.86339
	0.996927	0.931566
1.02542	0.981271	1.11189
1.13009	0.764911	0.780073
0.734429	0.961536	0.927696
0.964253	0.965761	1.03794
0.89752	0.824618	0.885903
		0.999355
0.969188	0.829019	1.19243
0.929791	0.83602	0.96518
0.951144	0.997078	0.961055
1.07905	0.86813	0.793011
0.844233	1.13467	0.762201
0.726266	0.897756	1.01642
0.807068	0.974857	0.841886
1.28045	0.745375	1.18325
0.911171		1.05859
0.777607	0.926704	1.01041
0.71426	0.937986
0.88281	1.11174	1.05123
0.698354	0.895788	0.792165
0.911447	0.805152	1.04975
0.841491	0.767678	1.19765
0.844667	0.915019	0.849781
	0.803152	0.75666
1.02209		1.07175
1.01105	1.19428	0.899705
	0.859588	1.03727
0.868959	1.17525	0.930017
0.982644	0.829933	0.91037
0.866153	0.865038	0.88661
1.04375		0.997296
	0.824933	1.06748
0.855442		0.776594
	0.872509	0.905312
0.763033	0.998087	0.817831
0.775617	1.00587	0.940507
	0.930531	0.813772
0.935503	1.0295	0.933507
0.887568	1.04123	0.873957
	1.24777	0.835806
0.871884	0.702182	1.00296
0.956632	1.04495
0.712094	0.833264	0.950991
1.00073	0.853682	0.915372
0.929222	0.961261	0.801957
0.899733	0.805094
0.900367	0.808754	0.800712
0.986999	0.94627	1.04225
0.797289	0.843498	0.720834
	1.13186	0.880363
0.76145	0.992084
0.851426	1.04125	1.03433
0.873303		0.802728
0.805242	1.04482	0.911001
0.792289	0.841789
0.947306	1.0427	0.779583
0.901422	0.757171	1.34727
0.907925	1.15478	0.984003
0.814015	1.19699	0.790815
0.727506		0.952611
0.807227	0.918836	0.906764
0.776954	0.898888
0.80955	0.963509	1.10772
0.758801	0.845222
1.14139	0.835273	0.954075
0.857545
0.788041	0.844447	0.817456
0.868024	0.928821	1.07997
0.852849	0.866049	0.919215
0.759126	1.01221	0.85274
		0.853223
0.882022	1.02104	0.834287
0.871764		0.917443
0.713406	0.803321	0.93654
0.957375	0.946533	0.861965
0.828897	0.719685
1.20472	0.856422	0.702851
0.832655	1.07163	0.693036
1.14124	0.709171	0.738692
	1.00478	0.858225
0.819053	0.777572
0.798019	0.955587
0.901214	0.865074	0.856365
0.825853	0.877044	0.711064
0.80439	0.85304	1.19103
0.823321
0.912111	0.912775	0.964586
0.852326	0.835028	1.32026
0.863043	1.02062	1.00666
0.67918	0.952737	1.16243
0.830914	1.00343	1.08528
0.93333	0.88549	1.3442
	0.950851	0.998039
0.848899	0.94872	1.0435
0.724246	0.748672	0.999244
0.754042	0.992612	1.03712
0.855939	0.90001
0.767483	0.972075	0.989817
	0.844484	0.888655
0.891576	0.840368	0.998844
1.05505	0.940096	1.10336
0.945095	0.890522	1.07956
0.971844	0.984641	0.904309
1.04588	0.858297	0.926103
0.740591	0.998256	0.927411
0.844815	0.857869	0.740792
1.07857	1.04481	0.956268
0.841755	0.922999	1.01536
0.901874	1.09928	0.962801
	0.950298	0.837555
0.694681	0.838878	1.15961
0.74674	0.785265	1.10042
0.726435		1.06902
1.06473	1.01534
1.13232	0.94906	0.987778
	0.907021	0.946858
0.907835	1.00153	1.02657
0.991526		0.994674
0.861644	0.885305	1.10981
		1.06287
	0.95766	0.994966
	0.743034	0.924346
0.86999	0.941145	0.919679
0.761445	0.947804	0.852956
0.868367	0.801965	0.980284
0.992969		0.743642
0.892256	1.04834	0.893634
0.963591	0.904007	1.06073
0.813513	0.891421	0.880328
0.873416	1.06987	0.920016
	0.953738	1.02329
0.958432	1.01434	0.929852
0.849239		1.11967
0.986597	1.03699	0.927411
0.785633		0.928294
		1.00092
0.747445	1.02443	0.819158
0.738106	0.830837	0.757917
0.770108	0.890737	0.92914
0.757971	0.989461	1.10465
0.943045		0.86012
0.897471	0.945433	1.05033
0.764365		1.16551
1.00466	0.782158	1.09408
0.894839	0.704169	0.919878
0.74996		0.689414
0.928508	0.994428	0.944972
0.875155	0.840324	1.14639
		0.963489
0.769446	0.965679	0.816192
0.90051	0.929165
0.820828	0.95635	0.988105
0.964979	0.984734	1.10857
0.849717	0.984187	0.82913
1.13562	0.907094	1.10882
1.13771	1.05814	1.08957
0.720335	0.930783	1.13095
0.979277	1.00615	1.02294
1.07637	0.800352	1.1024
1.14464	1.04447	0.868026
1.1525	0.78465
0.858292	0.943507	0.830761
0.88113	1.17494	1.11917
1.04861	0.796581	0.773905
0.824198		1.19069
0.883691		1.00099
0.753499	0.850153	1.02622
0.816163	0.807528	0.791151
0.761256	0.948351
0.832349	0.875919	0.694175
1.12403	0.9414	1.20229
0.818472	0.838864
1.02465	1.15327	1.00811
0.752282	1.06063	0.813103
0.946863	0.75511	0.928784
0.868386	0.815195	0.918016
0.87439	0.797112	0.963272
0.935541	0.934938	0.914355
1.2289	0.794424
0.842915	0.957758	0.844481
0.754319	1.11196	0.849526
1.02003	1.23537	1.11994
1.08614	0.839624	0.869946
0.978282	1.01079	0.82626
1.20803	0.933748	1.09354
0.714418	0.889314	0.750918
0.772476	0.934098	1.07692
0.982331	0.824405	0.969991
	0.976208	1.1022
1.05841	1.0413	1.05462
0.796713		0.855371
1.14922	1.15132	0.727886
0.846051	0.944944	0.753187
0.876381	1.14929	0.879048
	1.02157	0.961713
0.87665	0.882503	1.15872
0.850541	1.07608	0.855969
0.804966	0.990248	0.866557
0.736219	1.02888	1.06325
0.715203		1.08163
1.01066	0.897884	0.976674
0.735216	0.751832	1.06316
	1.00133	1.21467
1.16722	0.988724	1.10059
0.954248		1.01825
0.990172	1.17874	0.994102
	1.0202	0.996155
	0.802241	0.820528
0.879306	1.07459	0.900382
0.907588	0.893372	0.77474
0.952255	1.05804	0.909678
0.869474	0.985761	0.985558
1.12146	1.04485	1.27754
1.00601	1.09371	0.974204
1.20724	0.909152	0.798662
	0.905826	0.872769
0.939087	0.932849	0.962306
1.05324	0.929449	0.757451
0.861578	0.911634	1.05837
0.823237	0.803468	1.0649
1.0645		0.812443
0.938483		1.00629
0.907139	0.864585	1.0478
0.713689	1.02643
0.893546	0.930946	1.12204
0.899918	0.996885
	0.970794	1.00896
0.915648	1.15757	0.988141
1.10455	0.794268	0.93528
0.789193		0.879083
0.909087	0.907354	0.991962
1.04073	0.91312	0.965167
1.13086	0.927354	0.85696
0.850373		1.03854
0.917509	0.733196	0.970426
0.853278	0.980667	1.03067
0.976174	1.05658	1.03447
0.876239	0.925612	0.877122
0.988844		1.12385
0.76231	0.916333	0.875396
0.820736	0.93264	0.936871
0.895606	0.937545	0.888134
0.809415	1.07205	1.24071
0.875541	0.983001	0.835752
0.846066	0.812267	0.947358
	1.02492	0.774732
0.967782	0.799731	1.02803
0.978652	1.02436	1.03712
0.909723	1.05611	0.773746
0.770177	0.82155	1.33561
0.939384	0.949279	0.970361
0.983845	1.06592	1.03273
1.07428	0.728489	0.929384
0.912908	0.995623	0.735189
0.854528	0.898539
1.04971	0.903547	0.912727
	0.976999	0.723524
0.96374	0.942308
	0.91263	0.981613
0.911858	0.953207
0.831141	0.799752
1.01208	0.984563	0.839458
0.893243	0.972336	0.905681
0.823022		1.1518
0.811117	0.837805	1.00334
0.808515	0.964684	0.917334
0.982485	1.21269	0.950946
0.955651	1.03551	0.727609
0.752244	1.08563	1.0138
0.90731	0.995236	0.826623
0.783178	0.867755	0.809984
1.04796	0.872949	1.0635
0.912202	0.910059	0.960407
0.959572	1.0108	0.866545
0.852013	0.854466	1.13937
0.814142	0.843621	0.862977
1.07641	0.78116	1.21681
0.902437	1.11124	0.900025
0.968895	0.7681	1.31194
0.866018	0.906575
0.87725	1.05342	0.900622
	1.03749	0.933272
1.00874	0.804989	1.08886
0.914859	0.929053	1.11159
0.860423	0.921416	0.708733
0.715007		1.20264
0.828794	1.01431	0.763974
	0.708072
0.938644	1.1689	0.98218
0.807155	0.977568	0.939212
0.950968	0.834966	1.15382
0.951681	1.01804	0.873282
0.71412	1.04229	0.966221
0.898677	0.756774	1.08671
0.828713	0.902285	0.735326
0.785378	0.914055	0.765266
0.926921		0.789149
	0.911773
	0.888319	0.90006
	0.978995
0.911767	0.971429	1.34375
0.963017	0.882918	0.904575
1.02444	0.809568
0.870339	0.956888	1.00964
0.987735		0.865602
1.07566	1.01749	1.0643
0.965167	1.08733
1.09197	0.797743	1.13459
0.823576	1.08173
1.00931	0.87399
0.922	1.00371	0.895821
0.882609	0.809286	0.88927
0.878208	1.09403	0.966245
0.816823	0.872488	0.776179
0.946173		1.12901
1.00176	0.834912
1.01944	0.726413	0.753557
0.903777	0.9172	0.984047
0.899782
	0.797108	0.900105
0.779041	0.948931	1.27228
0.849478	0.752961	0.939716
1.1026	0.977586	0.852261
1.02407	0.973874
1.17582		1.04499
	1.01511	0.838001
0.782242	1.1141	0.979773
0.954161	0.946125	1.0899
0.994344	0.811953	1.0825
	0.916723	0.730302
0.818086	0.987104	0.812677
		1.03361
0.73212	0.885485	0.924371
0.990931		0.903204
	0.863962	1.10057
	0.75711	0.958135
1.00215		1.2542
1.12565	0.807036	0.874214
1.07829	1.02361	1.01936
0.97697	0.946197	0.797638
0.866213		0.869605
0.806208	0.79869	1.07971
0.869057	1.0267	0.820036
0.891311	0.801823	0.878249
	0.893077	1.16529
0.825878	1.05515	0.868986
0.857171	0.987687	1.06284
1.05488	0.718955	0.952606
		1.07371
0.96893	0.872531	1.03765
0.893999	0.887414	1.03718
0.724458	0.997132	0.837729
	0.889782	1.02039
1.03707	0.969093	1.11784
0.737503	1.0163	0.706476
0.762798	0.934131	1.03592
0.816042	0.87967	1.09132
	1.08054
0.935768	0.953833	1.05988
	0.870925	0.800504
1.11243	0.742452	1.08399
0.965243	1.05679	0.756872
1.03477	0.907032
1.17375	1.08433	1.08298
1.14236	1.04471	1.00533
0.731748	0.954398	1.27885
0.776112	1.08166	0.974496
0.95471	0.781646	0.952739
0.949991	1.0101
1.19656	0.966722	0.889126
0.746326	0.964834	0.779836
0.975515	1.00953	1.0735
0.995936	0.996973
0.959259	0.904771	0.874034
0.82715	0.959689	0.824715
0.959489	0.943787
0.956559	0.828478	0.714553
0.808251	0.93026	0.995039
1.15355
0.929257	0.900241	0.940478
0.723182	0.908683	1.06324
0.840635	0.984206	1.07016
0.837282	0.911421	0.836491
0.981
0.919373	0.900232	1.09308
0.835145	0.963687	1.03503
0.82706	0.912424	0.954174
1.04605	0.752171
0.844789
0.926671	1.0419	1.03351
0.848462	0.928155	0.901273
0.749252	1.05889	0.783459
1.04279	1.01517	0.792902
0.803911	0.942459	1.30756
	1.06015	0.993832
1.17299	0.94623	0.881318
0.756295
0.883004		0.953705
0.873839	0.85575
0.968459	0.845258	0.859452
0.785337	1.03455	0.970997
	0.86718	1.01441
0.787174		0.984931
0.769593	1.02841	0.880814
0.892624	1.11825
0.837175	1.04915	0.881308
0.939781		1.12583
	0.99048	1.18937
0.908468	0.97272
0.88378	1.00301	0.898039
0.815235	0.899898	1.02262
0.86154	0.916019	0.939896
1.0443	0.901385
0.881961	0.978647	0.995882
	1.07334	1.03747
1.03761	0.912061	1.07019
0.838629	0.940858	0.789614
0.911422	0.715821
1.03498	0.863009	0.9592
0.846654	0.903129	0.922985
	0.912622	0.914928
0.999633	0.9984	0.804025
0.959088	0.727422	0.885558
0.860753	0.944919	0.818759
0.852996	1.00017	0.901696
0.811297	0.931329	0.924878
1.15883	1.05376	0.904661
1.0143	1.06801	0.834726
	1.09547	1.13318
0.855874	0.890823	0.938219
0.859312	1.0493	1.22473
1.05959	1.0802	0.808799
0.777868	0.873364	0.831084
	0.834791	1.18245
1.01344	0.931236	1.24951
0.833425	0.900689	0.769056
0.875814	1.09308	0.812601
0.951351	0.786578	0.795538
0.941375	0.833897	1.00865
0.839186	1.02926	0.899743
	0.885099	0.796044
0.99372	0.803773	1.09417
0.904676	0.81596	1.05765
1.16237	0.960906	0.984547
0.976038	0.863088	0.962099
1.03803	0.755405	1.02522
	0.922446	1.04126
0.994268	0.844235	0.942407
0.906494	0.818237	0.905501
1.18802	1.056	0.907689
0.942734		0.753666
	1.03835	0.953022
0.743729	1.09169	0.942847
0.713392	0.92887
1.0706	0.924983
0.89603	0.859491
0.867772	0.813469	1.10422
0.824464	0.995991	0.920684
0.8333	0.983101	0.717665
1.03319	0.975867	0.903399
0.81863	1.12878	0.738773
	0.84875
0.813631	0.835625	1.06372
1.07245	0.988865	1.04033
1.05683	0.906491	1.16629
0.724318	1.14273
1.08935	1.07566	1.03392
0.824809		1.0901
1.08679	0.825065
1.06718	1.06735	1.04423
0.979676	0.89151	0.84163
0.924539	0.981669	1.20758
	0.941109	0.928424
0.821402	1.0391	0.991516
1.00422		1.04926
0.858132	0.919767	1.15214
0.981536		0.942924
1.01766		1.00321
0.981439	1.05169	1.06061
1.09344	0.935462	1.14733
0.913246	0.961008	0.98592
1.2289
0.828436	0.827508	0.916272
0.941713	0.842134	1.06459
0.884696	1.04967	1.0669
	0.958564	0.973678
0.952024	1.11598	0.991367
0.78667	1.26387	1.17586
0.858046		1.04525
0.985522	0.809708	0.808403
0.829052	1.14177	1.04717
1.0012	0.783638	1.00348
0.905315	1.03057	1.02106
0.910684		0.810585
0.904956	1.1066	1.02168
	0.889871	1.25888
0.885375	0.989054	0.94501
0.974785	0.873186	1.0101
1.0271	0.996783	1.02577
	0.999776
0.711701	0.929562
0.795552	1.0325	0.954647
	0.95839	1.16153
1.08826		1.30184
0.89461	0.981499	0.925708
1.04317	1.04297	0.78141
1.001		1.01581
0.846385		1.08141
0.83214	0.902	1.13905
0.893068		1.09253
0.935152	1.0447	1.0745
0.963411		0.774883
0.85795	1.15856	1.00306
0.949504	0.913695	0.990752
0.893036	0.908689	1.06676
0.820771		0.831437
0.810142	1.05046	1.08565
0.753477		1.16091
0.834956	1.12278	1.03881
1.164	0.878682	0.860645
0.851967		0.914265
0.942238		0.942617
	0.91902
0.885097	0.92462	0.894991
0.921621	0.948702	0.98514
0.932159	0.915477	1.0544
0.911211	0.909784	0.830702
	0.896167	1.12412
0.946033	1.05111	0.816025
1.01212	0.800815	0.891264
0.943302		1.13126
0.939905	0.952567	0.7751
1.06648	1.05642	1.11065
1.11818	0.77973	1.0053
0.977857	0.922575	1.08151
0.872993	0.953544	1.1747
1.14357	1.10087	0.898734
0.934429	1.15517	0.853517
0.892841	1.13631	0.958046
0.873116	0.983985	0.799585
0.831417	0.916163
0.881496	0.961528	0.707876
0.718906	0.852238
0.84518	1.19816	0.77999
1.02917	0.897804	1.03253
0.701748	0.730828	0.789537
0.928931	0.775179	1.05467
0.879979	1.18518	0.828536
0.808992		0.903254
1.00723	0.83834	0.925371
0.887856	0.803513	1.09333
0.946413	0.933542	1.07512
0.886849		0.772894
0.958858	1.07229	1.13041
1.00608	0.936116	0.745397
0.757596		1.08645
0.912523	0.879972	0.915116
0.889849	0.89372	0.966213
0.98927	1.06209
0.73653	1.01665	0.862104
0.890395	1.02885	0.771881
1.08596	0.877334	1.05481
0.93131	0.769154
0.938533	0.843808	0.940704
0.798026	0.980204	0.992461
0.901245	1.02418	0.807618
		1.15169
1.00575		0.985603
0.772302	0.762745	1.21065
0.715731	0.934619	0.782854
0.803014	1.08661	0.918692
0.888769	0.897336	0.847606
0.861664	0.943198	0.977953
0.892432	0.825302	0.836249
0.825111	0.762788	1.32151
0.852541	0.726424	0.827907
1.06858	0.882056	0.794276
1.00046	0.987665	1.3514
0.784488	0.779891	1.07545
0.900901	0.954391	0.887783
0.845152	0.986608	0.739834
	0.882358	1.01588
0.883382	0.912816	0.850672
0.905305	0.817649	0.753679
0.699173	0.772181	1.01713
0.959962	1.13236	1.11136
0.823101	0.992115	1.17537
1.00142	0.974949	1.0273
0.948884	1.1655	1.07846
1.09101	0.989698	0.9572
1.0002	0.776958	1.09208
0.860028	1.1903	0.934951
1.00996	0.869732	0.935687
	0.928261	0.883361
0.92456	0.768193	0.734911
0.840095	1.09748	1.00592
1.06688
0.93967	1.2258
	0.990826	0.697442
0.982032	0.959542	0.734978
0.988205	1.07881	1.08339
0.965073	1.10331	0.96221
0.901173	0.884933
1.13185	0.883576	0.788776
0.8947	0.708345	1.0993
0.759069	0.876622	0.893817
0.907702	1.07269	1.05285
0.899319	0.916125	1.03291
0.789275	1.01902	1.20448
	0.934788	0.982398
0.827255	0.839982	0.938492
0.836247	0.891334	0.796796
0.803667	0.971312	0.81414
1.10187	0.781604	0.784342
1.06404		0.858339
0.968426	0.994648	1.04852
1.01543	0.946803	0.816767
0.950222	0.976986	0.842225
0.891852	0.901514	0.928109
0.876987	1.18306
0.970914	0.990804	0.870568
0.905342	1.21346	1.02708
0.890436	1.18755
0.939389	1.07187	0.88355
0.754395	1.02834	0.874213
0.767454	1.00623
	1.18846
0.959786		0.892288
1.10075	0.9107	0.749892
1.01248	0.920131
1.04324	0.988683	0.956178
0.902267	0.969776	0.869058
0.832325	0.96754	1.03542
0.85016	0.898211	0.923199
1.1189	1.09003	1.11627
0.850622	0.89602	0.946475
0.938847	0.85012	0.879101
0.791125	1.06753	0.912757
0.861702	1.0435	0.828408
0.791309	0.994354	1.03521
1.00624	1.06773	1.0734
0.837644
0.924371	1.151	0.894883
0.994572	0.85414	1.05792
	1.05582	0.985518
0.745554	0.963075	0.758686
0.843807	0.919408
0.937144	0.934553	1.04393
0.857437	0.976064	1.28276
	0.911126	1.05252
0.728107	1.0461
1.05398	0.985984	1.03682
0.940862	0.873354	0.960177
0.987495	0.994289	1.00025
0.953897	0.959502	1.13146
	1.02434	1.05897
0.950948		0.971735
	0.95543	1.13962
0.861994	0.763825	0.83975
0.869767	1.03093	0.992594
0.810084	0.98949
0.907071	1.0483	1.03563
0.93416	0.858356	0.721726
1.22463	1.10579
1.17122	0.989013	0.988414
	1.24142	0.725638
0.88919	0.815992	0.978463
	1.15653	0.693449
0.837995	0.918938	1.01329
0.952737	1.06794	0.923053
	0.935772	0.839357
0.789125		1.11105
0.860122		0.841682
0.891129	0.754243	1.16552
0.882323	1.1026	1.07133
0.888112	1.03156	1.06352
0.77073	0.928096	0.760949
0.808834	0.944108	0.898393
0.971405	1.14739	0.956315
0.875564
0.771292	1.03342	1.01278
1.08903		0.937762
0.921921	0.994606	0.900359
0.905346	1.07641	0.825585
0.837933	0.89177	0.962604
0.902143	0.964975	1.04873
0.854411	0.729738	1.03529
0.991022	0.997151	0.913509
0.88135	0.89787	0.958487
0.823653	1.02535	0.769527
1.08753	1.13218
0.937889		0.94221
0.841012	1.08	0.908433
0.780573	1.11155	0.865154
0.909364	1.12464	0.857517
0.83867	0.706746	0.739198
0.974426	0.883041	1.02822
1.04302	0.824229
1.06893	1.0631	0.929856
0.8799		0.89161
0.958584		0.813583
0.717221	0.918063	0.920829
1.01707	0.716622	0.984168
0.900732	0.873621	0.698321
0.943229	0.92574	1.18935
1.18749	1.04044	0.88594
0.777989	0.878523	0.946149
0.875971	0.942556	1.28034
0.930436	1.0315	0.927682
0.948228	0.727423	1.02102
0.957625	0.937181	0.98918
0.929391	0.905319	1.05604
1.1816	0.909005	1.09335
0.818073	0.919227	0.764199
1.1129		1.14928
0.852684	1.11095	1.12125
0.956423	0.821479	0.953661
1.10432	0.923678	0.968245
0.805363	1.07893	0.994245
0.903562	0.977548
0.940066	0.99176	0.833271
0.807681	0.994148	0.774297
		0.916614
0.758946	0.99913	0.919247
0.972265	0.891845	0.797958
		0.955761
0.962448	0.919	1.01479
	0.932546	0.783627
1.08207	0.786832	1.01762
0.797591	1.02561	0.924615
0.906307	0.770459	0.916466
0.785608	1.04967
0.946888		0.926788
0.920902	0.913546	1.08025
0.93797		0.969498
0.776917	0.971929	0.87312
1.23773	1.1003	0.904266
0.921142	1.10467	0.975356
0.948541	0.930328	1.00544
0.824573	0.997549	1.01088
1.0259	1.16375	1.03456
0.955731	1.16241
	0.782926	1.03832
	0.743217	1.05591
0.928172	1.09401	0.900505
0.830101	0.833067	1.15285
1.01067		0.913404
0.772433	0.884041
1.01427	0.791217	1.1004
0.964383		1.13369
1.04918	0.81801	0.941974
	0.981114	0.897437
0.943328	0.828745
		1.0255
0.950867	0.747767	0.980303
0.871554	0.888877	0.952502
1.01711		0.974845
0.977577	0.927083	0.939954
0.816912	0.768902	1.04547
0.986015	1.02529	1.16751
0.932242	0.954242	1.03216
0.97624	0.732264	0.943965
0.91549	1.1292	0.93898
0.964188	0.809861	0.869381
0.902129	0.652394	0.773808
0.991864		0.865926
0.829305		0.968601
0.880395	0.776596	1.12431
0.830014	0.930199	0.823242
1.04184	0.776337	0.960707
0.859563	0.894145	0.717423
1.00005	1.00828	0.918726
1.11768		0.952645
0.944154	0.763005	0.897477
0.821175		1.10926
	0.907083	1.01015
0.898098	0.953429	0.998533
0.896514		0.864359
1.05939	0.895268	0.884722
0.820687	0.821487	1.08255
0.926262	0.90678	1.10639
1.04993	0.77111	1.22694
0.743769		1.08173
0.886125	0.805722	1.0169
0.885771	0.711198	1.07328
0.896371	0.852138	0.86825
0.971346	0.93064	1.0561
0.860966	0.74451	0.783097
1.00249	0.909591	0.960168
0.943604	1.10735
0.797737	0.859555
0.941181	0.908692	0.758623
1.04154	0.945895	1.19199
1.0449	0.823959	0.923067
0.85003	0.725912	0.917019
0.918982		0.958232
0.864599	0.781314	1.03912
0.968859	0.711493	1.17043
	1.03969	1.01121
1.00376	0.838762
0.850184		0.805336
0.970254	0.786469	0.938485
0.897217		1.03362
1.0163	0.877706	1.07578
1.00735	0.781875	0.925881
0.982306	1.01292	0.698838
0.954503	1.09141	0.760079
	1.00649	0.921589
	1.15181	0.985255
1.02383		1.03502
0.865147	0.908656	1.03785
0.909397
0.92634	0.697293	0.830644
1.02733	0.771578	1.0403
0.916873	0.931683	0.964677
1.09067	1.00932	0.863375
0.907861	0.912632	0.768739
0.851842		1.07778
1.16626	0.772754	0.95185
0.91385	1.23396	0.914991
0.917461		0.959003
0.93347	0.764368	1.00969
0.775434	1.0745
0.9411		0.776419
0.893149
0.839554	1.01013	0.88774
0.912247	0.765155	0.899418
0.735363	0.885104	0.946096
0.914	0.868993	0.87647
1.04197	0.941225	0.823957
1.15147	1.13553	1.02654
	0.808872	1.12137
0.749209	0.948698	0.876335
1.13615	0.999211	0.957116
1.05735	0.904735	0.802473
1.03052	1.0276	0.868107
		1.16079
0.802682	0.935784	0.912374
1.0067	1.00994	1.01535
0.947821	0.932418	0.777859
1.15888		0.887799
0.862567	1.22598	1.0691
1.0037	1.09318	0.693698
0.998098	0.974398	0.757884
	0.846303	0.992964
0.901086		0.869356
	0.728379	0.877517
0.692413	1.01444	0.968345
1.13631	1.05741	0.934758
0.898478	0.903164	1.04071
0.822517	0.799545	0.931017
1.03653	1.19171	0.799186
1.00811	1.06553	0.961849
0.865317	0.817578	0.972562
0.696912	0.923481	0.941045
1.00815	0.836454
0.846352	0.944856	0.894966
0.87886	0.857803	0.819844
0.832459	0.849797	0.824486
1.07329	0.724447	1.23518
1.0212	1.18857	0.880464
1.02239	0.92876
1.05959		0.776448
1.00779	0.91437	0.900137
1.01319	0.82224	1.07356
0.991778	1.0917	0.915462
0.966597	0.910386	1.03307
0.872581	0.85327	0.936755
	0.812351	0.908915
0.984044	0.84813
0.863833	0.811696	0.897251
0.834714	0.98978
1.13056	0.831075	0.914562
0.868894	0.811485	1.19011
1.02378	1.05738	0.853618
0.961833	1.09495	1.01008
0.859261	0.998907	0.989284
1.0347	0.84508	0.970429
1.03562	0.891748	1.32163
1.04922	0.946143	0.897697
1.08404	0.914689	1.00757
1.06665	0.939214	1.01917
0.958078	0.990929	0.978892
0.786875	0.876132	1.06484
1.00197	1.09712	1.03585
1.03469	1.1294	0.928903
		1.13644
	0.961417	1.1639
0.842896	1.16901	0.868558
0.92894	0.834374	0.973904
0.885292	1.04754	1.23048
0.996608		0.929867
	0.834427	0.908253
0.981504		1.05977
0.865356	0.86711	1.05566
1.00274	0.934759	0.88893
0.807687		1.01209
0.906625	0.842403	0.8879
1.09687	0.940885
0.843633		1.14993
0.756756	0.95922
0.832008	1.1215	1.11893
1.00007	0.826385	1.20411
0.882742		0.836759
0.92741	0.926659
0.983953	0.890702	0.96671
0.86592	1.02076	0.985306
0.82397	0.913373	0.934583
1.10195	1.10813	0.903873
0.849365	0.922168	0.863426
0.878144	1.02295	1.02312
0.710097	0.82066	0.975382
0.913576	0.986334	0.915699
0.85515		0.965609
1.04359	0.915562	1.00091
0.932974	0.903415	1.22114
1.06743	0.948753	0.863666
0.735067	0.666569	0.804139
1.06711	0.77541	0.810638
0.898325	0.753697	1.04766
1.10984	1.04812	1.09262
0.924997	0.900544	1.18959
0.99522	0.818014	0.946482
1.07201	1.00616	0.8996
0.893398	0.919277	0.865765
1.04945	0.892799	0.772086
0.764582		1.03483
0.986169		0.901116
0.764956	0.88306	0.996188
	0.912564	1.09591
	1.18484	1.03728
0.863368	0.857739	1.00123
1.01752	1.05833	0.954733
0.794982	0.902827	0.904319
0.989887		0.979865
0.88955	0.995794	0.912916
0.771649	0.955656	1.00854
0.956906	1.01704
0.868636	1.00573	1.1194
0.882041	1.01069	1.02391
0.863085	0.845504	1.1674
0.844724	0.971157	0.92084
0.804552	0.831965	1.1171
0.834172	0.936252	0.905776
1.11925	1.00725	0.843564
1.14955	0.794197	0.848044
1.11132	0.929726	0.970698
0.949796	0.740226	0.894956
0.791843	1.03762	1.2052
0.771408	0.834962
0.91543	0.875533	1.00106
1.11895	1.00683	0.819587
1.12287	1.15552	1.09292
0.866546		0.973362
0.908377	0.960946	0.96049
0.879449	0.967702	1.06196
1.03692	0.82406	1.02604
	1.00075	0.944117
0.742206	0.783938	1.06298
0.935475	0.852341	0.948834
0.722196	0.89056	0.895935
0.954052	0.871011	1.0191
0.848402	0.962071	0.79268
0.999032	0.852069	0.969099
0.970497	1.2319	0.78831
0.809214	0.890365
0.858615	1.03803	0.902339
0.867231		0.822424
0.886308	0.876862	1.05874
0.781016	0.83749	1.11788
0.90467	0.836135	1.13142
	1.00306	1.17807
		0.848093
1.08752	0.814972	1.03439
0.814776	0.878134	1.02356
0.981977	1.23852	0.940331
0.723709	0.950426	0.965837
0.793679		0.894743
0.856287	1.10277	0.716611
0.71098	1.25007	0.847409
0.954236	0.78053
0.893135	0.819971
0.86317		0.865308
0.980582	1.07677
0.901966	0.762477	1.09382
1.10202	0.939723	1.00577
1.11637		0.688329
	0.897901	1.16643
0.748376	0.915669	0.815498
	0.9081	0.881213
1.03317	0.94513	1.16632
1.01272	1.03459	1.10957
0.791715	0.834002	1.04289
0.726401	0.73463	0.929099
	0.842722	0.757801
0.762673	1.02364	1.09342
0.794243	1.11899	0.972238
0.789837	0.744034	1.17222
0.904515	1.03075	0.917429
0.901856	0.874814	0.914227
		1.28677
0.948292	1.04681	0.7235
0.924984	1.24467	0.953184
0.781303	0.775434	0.919226
1.06384	1.08577	1.15946
0.866726	1.07611	1.3152
0.875529	0.967056	1.06423
0.836947	1.03087	1.0829
0.924526	0.989654	0.976769
0.721699	0.907214
1.02592	1.12707	1.066
0.895722		0.989485
0.96602	0.930155	1.20441
0.885941	1.15833	0.925832
0.982778	0.946484
0.818817	1.18129	0.968043
0.940294	0.927287	1.04384
1.00154	0.86483	1.10581
0.84501	1.14976	1.05891
0.787385	0.841025	0.989879
0.946367	0.756959	0.798795
	1.08897	0.921046
0.84745	1.05454
1.01999	1.09711
0.702627	1.0295	0.716671
0.822635	0.653771	0.79745
0.884221	1.1123	1.19744
1.01596	1.02479	1.30831
0.92644	1.00102	0.966177
0.915335	0.891553
0.830134	0.990751	0.976473
1.00836	0.731731	1.09116
0.969238	1.09911	1.23422
1.05321	0.911977	1.06179
0.879019	0.979467
	0.970649	0.829498
0.968051	1.1212	1.1013
0.967888	1.07622
0.892093	0.773532
0.899691	0.7748	0.716946
0.754377		0.994812
	0.997147	1.16792
0.754853	1.00852	0.86357
0.820607		0.881305
0.973706	0.723488	1.22238
0.818808	1.02155	0.836539
0.93222	0.980853	0.912915
0.840389	0.929806	0.755037
0.804201	0.779602	0.769075
0.846956	0.844991
0.871754	0.698135	1.00349
0.727017	1.00492	0.971845
0.969052	0.74487	1.17446
0.8055	0.930048	0.747718
0.807852	1.04292	0.941068
0.78841	1.17436	0.839397
0.954812	0.869959	1.01395
	0.84407	1.1176
0.91092	0.787748	1.08111
0.867029	1.07548
0.700434	1.04843	0.78491
1.09086	1.156	0.859813
1.04156	0.96562	0.988123
0.784878	0.671231	1.07134
0.778808	0.802515	0.912564
	0.938931	1.09371
0.848743	0.875714	0.897917
1.12821		1.03021
0.961545	1.09811	0.860313
0.899349	0.964794	1.07232
0.822512	0.999467	0.852868
0.718455	0.972242	0.843863
0.910512	0.843798	1.00161
1.00205	1.10006
		1.14106
0.816937	0.814547	1.01583
0.793825		0.926513
0.714495	0.970538
0.916267	1.02948	0.902825
0.908286	0.844254
1.00819	1.10931	0.947004
0.989434	0.919923	1.03126
0.910697	1.14627	0.851141
1.07246		0.932363
0.728298	0.795967	0.944221
	1.0149	1.07975
0.880009	0.87916	0.950718
0.942457	0.920282	1.09516
1.03351	0.704057
0.896497	0.839812	0.99464
0.913951		0.858688
0.991231	0.865204	1.08419
0.872919	1.06753	1.02211
0.872941	0.875135	0.955964
0.985911	1.0796	0.836661
1.02269	0.983512	0.714336
1.01062		1.00792
0.774195	0.935821
0.942868	0.880649	0.81342
0.803922		0.782114
0.936398	0.802128	1.13136
0.904638	0.838865	1.00543
	0.803174	0.762133
0.922319	0.850592	0.887595
0.866622	0.666213	1.06319
0.941203	0.992864	0.960572
1.01156	0.854339	0.834458
0.908021		1.13278
0.848348	1.09506	0.84623
0.880088	0.938934
0.717798	0.938379	0.832461
	0.811308	1.15165
	1.05545	0.971525
	0.955232	0.717685
0.831858	0.902265	1.2538
0.834016	0.903014
0.938778	0.843036	0.917553
0.940695		0.802798
1.09489	0.867233	1.06917
0.818386	0.925731	1.04487
	1.07313	1.02737
0.862383	1.13434
0.746421	0.995161	0.80177
0.838197
0.815419	0.650674	0.82059
0.729581	0.813349	0.926171
1.00124	0.964823	0.904059
	0.866522	1.02116
0.949912	0.960242
1.01104		1.05588
0.817147	1.01701
0.971354	1.08343
0.910607	0.97582	0.832817
1.00695	0.792647	1.29373
1.18627	0.746242	0.844609
0.8162	0.72951
0.970643	0.953566	0.834792
0.943614	0.945558	1.24206
0.778973	0.889622	1.03058
1.00677	1.01443
1.0721	0.901429	1.03588
0.944583	0.98161	0.937204
0.963941	1.02532	0.753908
0.931347	1.01597
0.974312	0.790625
0.814286	0.767467	1.14065
0.987931	1.15015	0.983993
0.950564	0.954802	0.915145
1.15124		0.90541
1.0886	1.14721
0.774551	1.03937	0.781689
0.777154	1.02954	0.852388
1.02509	0.890527	0.78424
1.0234	1.1557	0.943631
0.805161	0.977531	1.06732
0.843973	0.742379	0.702756
0.81833	0.956508	0.934663
0.909169	0.957681
1.15907	0.857182
0.849107	0.987489	0.790078
0.899541	0.668262	1.01007
1.05967	0.954992	0.737183
0.911804	0.914738
1.03855	0.850803	1.33841
1.08553		0.816555
0.950774	0.931211	0.841468
0.917267	0.937318	1.10648
1.04777	1.00559	0.967856
0.791475	0.756067
0.971461	0.861718	1.01231
0.783872	1.09665	0.862699
0.84853	0.850418	0.920962
0.948286	0.964536	1.01784
0.712371	0.723216	0.965549
1.12936	0.813132	0.825123
0.868732	0.903038	1.03493
0.960631	0.900742	0.926457
	0.795376	0.934914
0.868634	0.762457	0.975541
0.922714	1.08572
0.998378	0.994416
0.858274	1.24629	0.919059
0.88914		0.916296
0.865099	0.780581	1.15072
1.04547	0.774443	0.982141
0.939891	0.980623	0.960424
	1.12398	0.935856
0.76374	0.842083	1.19391
	0.804666	0.892076
0.985208	1.03755
1.14796	0.706139	0.86388
0.945867	0.928455	0.791412
0.71314	0.929352	0.92193
0.966092	1.11184
		1.03971
1.03619	0.738915	0.742393
0.95605	0.743359	0.883632
0.875493	0.713759	0.814923
	0.861068	0.889835
1.10059	0.670972	1.07846
0.934653	0.886293	0.912974
0.869453	0.754857	1.1393
0.911504	0.911468	0.793978
0.81996	1.28485
0.875663		1.10841
0.951884	1.08605	0.937841
0.975211	0.791443	0.903125
0.921822	1.01455
0.8602		1.00353
0.98226	1.12386
0.937092	1.01754	0.933996
0.718777	0.769898	0.946952
1.11506	0.835573	0.981715
0.992462	0.792662	0.778299
0.75942	0.883798	0.989209
1.01602	0.958013	1.02695
0.835567	0.921844	0.945494
0.986413	0.955105	0.810378
	1.01304	1.03753
1.08773	1.05825	0.967366
0.980876	0.710384	1.00922
0.904785		1.03685
0.75835	1.07587	0.955388
	0.982252	0.725914
1.02872		0.87515
0.947503	0.936801	0.802377
	1.11742	1.09544
0.915	0.93039	0.982038
0.879648	1.01361
0.94499	0.648658	0.749556
1.07222	1.02323	0.827808
1.18424	0.868376	0.826186
0.792826	0.950227	0.918072
		0.836065
0.859172	0.700147
1.00304	1.14229	0.95533
0.934655	0.917405	1.00435
1.05958	0.683679	0.870666
0.969664		0.805718
0.870334	0.661128	1.19676
0.760532	0.81664	1.12097
0.805533	1.04439
0.968683		0.821139
0.879421		1.04023
0.941793	0.965215	0.923159
1.06721	0.948544	0.793008
0.947199	0.927972
0.944484	0.784371	1.05367
0.859196	0.749599
		1.02448
1.00687	1.18463	0.887802
0.927841	0.727133	0.969971
0.71555	0.722623	0.929466
1.02219	0.876662	0.708133
0.725416	1.13504	1.19179
1.11837	0.767471	0.986337
0.870784	0.95174	0.862833
0.819436	0.929877	0.802098
0.934954		0.973151
0.809869	1.01759	1.01911
1.00761	0.833415
0.990267	1.01619	0.831082
1.0247	1.03866	1.15169
	0.789601
0.985276	0.84322	0.908252
	0.985035	0.869075
0.960648		1.12689
1.01267	1.00692	1.05369
0.70055	1.16489	0.979852
0.889525	0.788582	0.784666
0.868169	0.993591	0.860467
0.714043	0.913306	0.88584
0.895241	0.796529	0.967663
0.950277	1.03402	0.861179
		0.947244
0.943699	1.01332	0.97007
0.949947	0.89568	1.06926
0.899471	0.985539	0.805645
0.869319	1.09767
0.876842	0.934821
0.938574	0.988911	1.00721
0.75084	0.701268	1.15626
0.984851	0.816254	0.729769
0.920787	1.09187	0.872237
0.834312	0.981023	1.06308
0.834001	0.884356	0.985628
0.954266		0.991446
0.899574	0.93507	1.13416
0.786131	0.738948	1.04062
0.762112		0.81764
	0.702201	0.987078
0.769643	0.911886	1.01153
1.05293		0.894148
0.706667	1.25	0.785661
1.02088	0.912591	0.926064
0.85041	0.985084	1.08838
0.728883	0.711682	0.860939
0.80683	1.06024	1.0024
0.935946		1.03242
0.973545	1.01184	1.00495
	0.994197	0.967892
0.86935	0.809837	0.806158
0.725891		0.887119
0.860446	0.874019	0.92638
0.715978		0.900743
0.981984	0.796578	0.964277
1.0313	0.864749	1.13408
0.876416	0.843991
0.931142	1.08357	0.982777
0.805188	0.950998	0.905853
0.813474	1.1365	1.04827
0.876737	1.01082	0.938311
0.952556	0.733078	0.990724
0.990715	0.910442	0.741441
[truncated: 273 more rows]

## Sheet: TFEB_TR 30min torin2 response 
TFEB_TR; 30min torin2 response
vehicle	2.5nM Torin2	100nM Torin2
	1.13373
1.22168	1.17622
1.44805	0.968362	1.11683
	0.966425	0.999738
	0.912712	1.27279
1.1711
1.08646	0.90541	1.06683
1.33381	1.35917	0.957015
1.03303		1.03126
1.4033	1.02917
1.23721	0.888965	0.885361
0.979508	0.855639	0.810075
1.36542	1.30904	1.31373
1.22639	0.952715	0.908869
0.951348	0.909677	0.939893
1.56013	1.10198	1.54371
	1.19463	1.46985
1.19096		1.27454
	1.19282	1.22448
0.896067	1.00052
1.99157	1.1686	1.12104
2.12867	1.57637	1.0256
1.26543	1.49954	1.21259
1.46303		1.04694
1.35297	0.989698	0.958099
1.46435	1.1405	0.966357
1.03313	1.20578	0.875189
0.919448	1.21671	1.22447
1.266	1.57323	1.42875
1.12799	1.30177	1.04588
1.29095	1.15805	1.21409
1.19015	1.85262
1.33473	1.34083
1.67092	1.42283	1.14765
1.45034	0.93119	1.324
1.47758	2.2592	0.960589
1.69431	1.14861	1.12457
1.10292	1.30825	1.0691
2.00964	1.30248	1.3199
1.09026	1.42962	0.821333
1.59981	0.928099	0.956343
1.18327	1.38327
1.69681	1.36917	1.29085
1.14338	0.955802	1.09064
1.22976	1.13551	1.07071
	1.04732	1.00169
2.21547	1.16764	1.42616
	1.21271	1.19473
	1.0482	1.55648
1.19425	1.30057	1.27321
1.36252	1.1042	1.21061
		1.18587
1.25332	1.35299	1.0958
1.21283	1.14696	1.01945
1.16541	1.21769	0.885275
1.15396	1.28379
1.23256	1.16857	1.00338
1.39011	1.13921	1.1763
0.97459	1.47535
1.3463	1.06365	0.962608
1.42238	1.14405	1.08461
	1.30655	0.949208
1.36365	1.28501	1.28235
1.35114	1.3173	0.846183
1.16305	1.16169	1.66528
0.854247		1.15855
1.27301	0.820542
1.31441	1.12121
1.85534	1.13062	1.05609
1.3851	1.65953	1.04515
1.23989	1.44375	1.39716
1.30687	1.18387
0.933812
1.17548	0.946275	0.960578
1.04232	1.0868
1.53518		1.58591
1.19222	1.12759
1.3417	1.12978	1.2028
1.09821		1.35512
1.8051	1.43171
0.921763	0.863343	0.882665
1.07784	1.17937	1.19461
	1.81361	0.993564
1.01397	1.55037	1.21805
1.32308	1.47051	1.28939
1.00427	1.67186	1.16654
1.24959	1.18913	1.10116
0.983134	1.14294
	1.00493	1.07804
1.11643		1.00154
1.60028	1.13339	0.988911
1.40812	1.27635
1.43225	1.39106	1.10622
1.50454	0.92653	1.10103
1.42016	0.895665
1.08595	1.16574	1.54643
1.30434	0.992316
0.986022	1.00324
1.19472	1.13265	1.39263
1.34425	1.35912	1.08618
1.16326	0.95474	0.849037
1.40642	1.45965	1.27335
1.98556	1.32152	0.792164
1.20044	1.13983	0.989192
1.88135	1.25013	1.07762
1.90995	1.20137	1.00589
1.29225	1.30042	0.911495
1.19424	1.00308	1.20177
1.08455	1.48087	1.44231
1.4564	1.16696	1.22579
1.31328	1.20094	1.25828
1.68235	1.35027	1.14392
1.69839	1.28347	0.987254
1.14511	1.1291	1.23906
0.968702	1.17595	1.0798
1.58453	1.10937	1.21348
	1.3665	0.788009
1.30244	1.19261	1.04841
1.13304	1.33143
	1.15474	1.18818
1.20916	0.992628	1.33932
1.03082	1.42042	1.26995
1.36114	1.32319	1.10242
1.29046	1.28657	1.22925
0.940843	1.44541	0.838818
1.12002	1.49049	1.05471
	1.07654	1.65934
1.01004	1.73025
0.993581	1.43486
1.29209	1.49103	0.968396
1.23492	1.39486	1.12448
	1.22478	1.10296
1.31404	1.13611
1.05494	1.52077	1.20623
1.26251	1.08313	1.1327
1.20352		1.5162
0.893184	1.08619	1.09156
1.2352	1.04489	0.891885
2.25067		1.14642
1.11234	0.886651
1.44161	1.14471	1.40406
	1.31553	0.964437
1.2576	1.38339	1.58044
1.25281	1.44737
0.876744		1.15668
1.33424	1.53262	0.98651
1.34801	1.3609	1.05866
1.43052	1.23316	1.09555
1.43754	1.05314	1.10086
1.19975	1.31069	1.23368
1.32706	1.36415	1.41829
	1.41298
0.990692	1.34654	1.03331
1.19354	1.29342	1.1145
1.87801	1.1887	1.23974
	1.23404	1.07019
1.1049	1.04774	1.13488
1.35963	1.32111	1.17747
1.23428	1.50342	1.09515
	1.02786
1.16929	1.19672	1.52896
1.35452	1.32043	1.02971
1.38408	1.31423	1.00254
1.39367	1.24734	0.943447
1.39163	1.44986	0.931918
0.858618		0.885679
1.45263	1.40333	1.39832
1.34128	1.29732	0.910887
1.09195	1.53552	1.08573
1.57769	0.988043	0.957632
	1.20345	1.00732
1.39154	1.49217	1.40458
1.45688	1.33984	1.00214
1.42996	1.92438	0.995809
1.70237	1.63143	1.04877
1.4296	1.02145	0.989201
1.09144	1.12329	0.872166
	1.44755
1.25029
1.52775	1.32256	0.903184
1.64464	1.32076	1.05479
2.0463	1.0859	1.11746
1.06452	1.25704
0.918001	1.33784	1.04695
1.46453	1.92959	0.942844
0.938956	0.912867
1.20099	1.34268	1.07272
1.88705	1.01359
1.284	1.22969	1.00162
1.14677	1.02856	0.880528
1.24141	1.46992	1.46511
1.53896	1.37655
1.15079	1.13334	1.23364
1.57172	1.24786	0.970438
1.27208	1.41054	1.0225
1.10628	0.987912	1.23775
0.859248	1.14259	1.24148
2.05677	1.37898	1.03347
1.12695	1.22703	0.867617
1.36233		1.07858
1.64219	1.24798	0.944676
1.35428	1.11786	1.18641
1.25226	1.21264	0.824742
1.00629	1.98868	1.83958
1.15756	0.924634	1.22095
1.23707	1.62865
1.32042	1.65403	1.02863
1.16531	2.04484	1.25003
1.09027		1.33541
1.16604	1.05451	1.19687
1.48178	2.16739	1.03122
1.11183	1.04865	0.974604
1.10221	2.29032	1.0453
1.02887		1.08969
1.4617	1.53384	0.983395
1.86162	1.06344	1.39781
1.02825		1.17005
1.15626	1.60342
1.11794	1.17965
	1.32567
1.91231		1.0378
1.3117	1.34492	1.20487
1.1266	1.34269	1.11186
1.24674	1.06819
1.19328	0.929486	1.23094
1.31866	1.09891	1.00942
	0.967784	1.21665
1.36773	1.40689	1.05178
1.37207	1.40136	1.14557
1.15912	2.26236	0.972274
1.23191	0.831079	1.14149
1.03218		1.42479
0.859675	1.20385	0.945048
1.21689	1.30336
1.32059		0.856972
1.2067	1.21712	1.17802
1.44502	1.23625	1.0517
1.29089	1.39205	1.02075
1.11767	1.66882	1.20758
1.39414	1.25281	0.913166
1.44064	1.30177	0.917178
0.940651	0.9823	1.01447
1.53398	0.994462	0.997065
1.2159	1.34636	1.23765
1.26132	1.70139	1.01751
1.31896	1.15168	1.05979
1.04661	1.27872	1.04839
0.944233	1.01941	1.34038
1.09049		0.99469
1.25988	1.44491	1.01336
1.28441	1.7627	1.16853
0.849704	1.24261	0.820872
1.60366	1.19149	0.811387
0.875414	1.14309	0.99447
0.89009	0.874928
	1.86319	0.935563
1.41702		1.02122
1.06361	1.08276	0.990269
1.3566	1.05638	1.85462
1.19166	1.11175	1.1647
1.17385	0.961923	1.06196
1.63329	1.04332	1.15125
1.23688	1.0489	1.09978
0.909046	1.34423
1.2901	1.40041	1.53625
1.2851	1.1991	1.13059
1.23353	1.1061	1.07376
1.55021	1.19693	1.05726
0.953679	1.20185	0.778152
1.39896	1.43909	1.42071
1.38112	1.16155	1.09807
1.35999	1.46385
1.23309		0.996439
1.26455	1.28004	1.15611
1.20473	1.10518	1.11621
1.11951	0.918676	1.11303
1.71594	1.43112
1.0637	1.4388	0.993125
1.24152	1.86359	1.33892
1.21796	1.03459	1.1506
1.36487	1.13435	1.16133
1.05321	1.25488	1.42582
1.04753	1.14975	0.841268
1.21342	1.16675	0.954017
1.25351	1.11191	1.16376
1.1548	1.45614	1.07077
1.69657	1.04138	0.992667
1.08447	1.29884	1.21671
1.12148	0.914144	1.23867
0.980611	1.02049	0.967549
1.28351	1.29611	0.809966
1.23221	1.23112	1.27215
1.32362	0.812652
1.05302	1.25426	0.844739
1.53068	1.23467	1.13896
1.01569	0.877271	1.09568
1.24136	0.972889
0.914643	1.0943	1.41683
1.26749	0.977507	0.96497
1.5008		1.03056
1.02197	0.995618	1.68618
1.00566	1.18516	0.960631
1.38513	1.18333
1.20609
0.991555	2.01903	1.02161
0.922847	0.921997
1.21309	1.60394	1.71779
1.41653		1.27205
1.18764	1.04118	1.01246
1.23496	1.35972	0.876218
1.08832	1.30837
0.966069	2.15785	0.945052
1.13067	1.13869	0.785502
1.60214	1.16814	1.0249
0.894937	1.30961	1.00559
1.47577	1.22021	1.22319
2.09338	1.2844
1.24181		1.03055
1.53662	1.27766	1.60869
1.73931	1.6376	1.71745
1.12314	1.15409
1.09778	0.974623	1.10652
1.09613		1.12173
1.14752	1.19351
1.27557	1.09756	1.1022
1.11159	1.12298	1.17772
1.33764	0.795131	0.951545
1.14969	1.14357	1.14654
1.30156	1.63461	1.04064
	1.34024
1.52523	1.7595	1.22882
1.14341	0.798721	0.905671
1.28161	1.875	0.983799
1.21666	0.923184	1.08479
1.40202	1.36143	0.989366
2.02149	0.903178	0.997285
	1.83599	1.11847
0.999387		1.38283
1.06685	1.02571	1.14525
1.13113	1.32138	1.07432
1.1046	1.16354	0.992224
1.25142	1.31606
1.10432	0.913958	1.04931
1.1423	0.994591	1.03049
		1.15193
	1.21154	1.02993
1.02443	1.00733
0.836064		1.64251
1.19645	1.21826	1.53942
1.58327	1.51685	1.2917
1.16313	0.969915	1.08882
0.982371	1.50879	0.867061
1.2526	1.24758	0.938455
1.00313	1.23239	0.913818
1.06705	1.54062	0.990495
1.00493	1.2545	1.20412
1.37266	1.10428	0.89934
0.901285	1.08935	0.952727
1.18158	1.25764	1.12152
1.40601	1.40317	0.91416
1.0693	1.29984	0.978253
1.20204	0.953331	1.01052
1.15308		1.01856
1.67125		1.23391
0.936707	1.12118	1.42411
1.49691
1.23665		0.987497
1.00145	1.52653	0.884921
1.75295	1.52543	1.15061
1.73006	1.30763	0.823359
1.23439	1.73847	0.984285
1.03663	1.50982	0.927822
0.958664	1.33408	0.961449
1.54641	1.03186	1.11942
1.3099	0.898503	1.04225
1.07617
0.878826	0.953281	1.24608
1.10421	2.20958	1.02587
1.41427	1.04675
1.12677	0.984025	1.14124
		0.986955
1.29497	1.7809	1.20619
1.08774	1.24509	1.3086
1.17883	1.12285	1.08901
1.11406	1.15375	1.4084
1.21463	0.799328
1.14293		1.10327
1.15618	0.961655	1.07643
1.41716	1.04404	1.19507
1.24375	1.18527	1.01458
0.966692	1.29201	1.17095
1.22145	0.956746	1.08098
1.0343	1.49264	1.54313
1.06108	0.871233
1.3243	1.75409	0.964801
	1.27626	1.06079
1.27228	1.32251	1.14379
1.641	1.41885	0.930963
0.847193	1.18609	0.972801
1.49922	1.14356	0.807768
1.30951	1.65055	0.857333
1.21686	1.07947	0.934469
1.37658	1.66061	1.20426
1.4489	1.35538	1.03556
1.03439	1.16406	1.21228
	1.41402	1.0922
1.2087		0.849953
0.875666	1.03374
1.58873	1.46169	1.09836
1.02328	1.11247	0.941054
0.823158	1.17629	1.14722
1.52767		1.30691
1.41204		1.04726
1.02206	1.24943
1.30507	1.08649	1.14139
	1.3005	0.929786
0.882026	0.982898	0.835757
1.1755	1.28484
1.14499	1.28247	1.20496
1.15144		1.15967
1.00377	1.16815	1.12051
	2.0149	0.956279
1.42552	1.43255	0.880139
1.09568		1.00406
0.988188	1.64685	1.24653
1.34588	1.23457	1.30096
1.20992	1.20531	1.05576
1.15989	1.1092	1.12833
1.19006	0.975206	1.23679
0.996143	1.24425	0.943699
1.0257	1.06212	0.883622
0.832849	1.52383	1.14059
0.919941	0.971303	1.29832
1.62898	1.24098	1.0801
2.11858	1.03333	1.05264
1.02663	0.90543	0.918723
2.2702	1.44036	0.826918
	1.37289
0.914934		0.759201
1.41155	1.66463
	0.950053	1.03865
1.37591	1.06291	0.906169
1.304	1.31578	0.950255
0.968493	1.00199
1.13778		1.05406
1.16388	1.47288	1.13083
1.06034	1.01068	1.13638
1.95464	1.39333	1.09304
0.809731	0.961418	0.846492
1.08404	1.05209	1.00087
0.934309	1.21756	0.904608
1.32748	1.24483	0.91038
1.51461		1.04491
	1.20457	1.05247
1.41114	1.44193	1.02721
	1.37908	0.826403
1.22236	1.42813	1.61664
1.43097	1.07639	1.36278
	1.20013	1.1004
1.37758		0.918395
	1.08664	1.10501
1.21878	1.19626	1.25042
1.17102	1.23727	0.980758
1.00593	1.83195	0.955811
0.98163	1.55218
1.17011	1.05022	1.15373
0.976893	1.48813	1.09248
1.21331	1.17634	1.12002
1.1344	1.21565	1.03055
	1.29817	1.25985
1.19423	1.21073
	1.3021	0.869835
1.45076	1.33007	1.17928
1.2015	1.22798	0.926807
2.02414	1.59179	0.972308
1.24604	1.33811	0.972532
1.09782	1.32233
	1.33418	1.34153
1.04463	1.0832
1.34713	1.026	1.20178
0.931051	1.22561	1.2002
1.01862	1.34824	0.929972
1.26621	1.39294	1.202
	1.11213	1.30433
1.0802	1.44201	1.09035
1.24948	1.18146	1.13573
	1.23166	1.58205
1.21228	1.18906	1.01436
	1.18207
1.11323	1.23574	1.27713
1.11616	1.16385	0.986856
0.926957	1.07598	0.912494
1.1734	1.76639	1.09566
1.36699	1.33102	1.08461
2.01808	1.29627	1.1852
0.870363	1.1575	1.0924
1.06605	1.13081	0.9994
1.38186	0.966467	1.11821
1.25093	1.19215	0.875922
1.2841	0.980537	1.04697
1.24616	1.36567	0.945831
1.09176	1.11837	1.12202
1.06531	1.46346	1.06571
		0.992078
1.08801	0.865572	0.866268
	1.4723	1.05542
1.1039	1.12486	1.1364
1.16552	1.29938	1.04642
1.17591	1.19361	1.06517
1.30595	0.988816	1.0891
1.30909	1.04935	1.08399
0.919831	1.28037	1.02512
1.42783	1.36233	1.05441
1.09132	1.40876	1.117
1.29321	1.05703	0.918825
1.24715	1.1382	0.811922
	1.33856	1.02138
1.34252	1.11674	1.03595
1.18956		1.08003
1.21147	1.55435	1.13773
1.02044	1.1195	0.7414
1.04042	0.847326	1.18517
1.0162	1.40074	1.22673
1.30666	1.40731	1.56217
1.25179	1.04702	0.946089
1.17077	1.41739	0.955656
1.38692	1.14479	1.04106
0.992688	1.40601	0.816021
1.00267
1.07078	1.04123	1.23095
1.0209		1.04859
0.989382	1.07032	1.15657
0.923758	1.12338	1.31247
1.25664	1.03782	1.31299
1.20159		0.949292
1.23453	1.2204	0.991618
1.18949	1.27716	1.11501
1.22049	0.978256	1.06279
1.18415	1.2057	0.865076
1.72319	0.998836
1.12318	1.32594	1.20039
1.17974	1.22099	1.12703
1.03636	1.28802	1.02756
1.04754	1.2616	1.10377
1.29538	0.885164
0.98067	1.2615	0.895145
1.29134	1.45703	1.0593
1.29136	1.40726	0.989207
1.64132	1.24657
	1.30804	1.1056
1.53857	1.02809
1.26824	1.12022	1.01349
1.03064	1.21391
1.23418	1.04819	1.11034
	1.07129	0.932569
1.29931	1.3765	1.17241
1.02212	1.10975	1.48268
1.61336	1.09576	1.17486
1.27281	1.0311	1.09327
1.1702	1.27682	0.831943
1.24132	1.6532	1.04661
1.1483	1.19988	1.09882
	1.14781	1.05611
1.27723		1.05033
0.98126	1.44255	1.16316
1.37987	1.01241	1.01676
	0.924313	0.911088
1.06843	0.80905	1.07633
1.39631		1.0914
1.28518		0.925197
0.967965	1.06338	0.903413
1.11665	0.930924	0.880286
1.21471	1.25136	0.957864
0.985407		1.1908
1.26432	1.1456	0.753407
1.23827	0.97466	1.16868
1.34422	0.88257	1.2357
	1.2795	1.23053
1.04527	2.14218	0.910862
1.1182	0.843875	0.948584
1.23584	1.25278	1.09439
1.28723	1.03944	1.16063
1.37205	1.06195	1.03716
1.2822	1.06949	0.869137
1.3399	1.21477	0.967589
		1.00897
1.47927		1.14509
1.11451	1.25625	1.11677
1.34283
1.20697	1.25801	1.00203
1.25015	0.979501	0.883969
1.17123	1.11858
1.86196		1.03524
1.18495	0.830164
1.30174	1.31957	0.956507
1.59187	1.30892	1.09376
1.20258	1.30785	0.834296
2.06733		1.09602
1.34519	1.0497	1.04411
1.2477	1.30023	1.25121
0.93351		1.26661
1.10404	1.53726	0.868692
1.45276		1.82315
0.837284	1.46108	1.13751
1.35433		1.11019
	0.848082	1.03659
1.1545	1.66643	1.27991
1.05941		1.03082
1.44946		1.09094
1.60998	0.940575	1.15989
1.15221
	0.98158	1.17705
1.19141	1.06449	1.15869
	1.28632
1.19054	1.37277	1.08104
1.02429	1.4406	1.18062
1.40734	1.26782	1.37104
1.20156	1.19579	1.08505
1.28288	1.35279	1.09476
0.988618	0.837071	1.32183
1.27317	1.23125	1.04855
1.30972	1.38815	1.31438
1.29017	1.23336	1.20914
1.18699	1.03986	0.908244
1.22394	1.03979	0.825162
1.41283	0.935153	1.09088
1.16298	1.2225	1.08407
1.07646	1.01995	1.37743
1.05099	0.944538	0.860862
1.41698	1.29261	1.13976
1.41588	0.925352
1.17753	0.94331	1.01293
1.08598	1.50876	1.01723
1.21582	2.15513	0.914727
1.37851	1.23857	1.43068
	0.990781	1.17818
1.43346	1.13731	1.13386
0.898932		1.27846
1.08191	1.08543	1.12814
1.6268	1.20578	1.27045
1.15447	1.9549	0.966281
1.25367	1.10334	1.16875
0.989172	1.12708	1.00982
1.13836	1.00602	1.13727
1.25577	1.4367	1.16051
1.4251	1.07547
1.15906		0.933861
1.25927	1.26302	1.2237
1.18148	1.46533
1.16179	1.29321	1.00375
1.28984	1.00021	1.06173
1.3625	0.933318	0.797996
1.04811	1.03359	1.00941
1.36234	0.980447	1.03615
1.33354	2.09527	0.891998
1.33046	1.61713	1.15595
1.30325	0.993748
	1.06898	1.08276
1.21518		0.90585
0.934146	1.18342	0.856472
0.849682	1.10633	1.35303
1.2415		0.981874
0.993371	1.48176	0.89225
1.14658	1.3458	0.902219
1.3124	1.20393	1.04228
1.31989		0.879798
1.3768	1.37982	1.0786
1.81403	1.12504	1.31001
1.10732	1.30681	1.31573
1.3503	1.07301	1.03509
1.15882	1.1493	1.0592
1.28761	1.13182	0.968218
1.95376	1.07787	1.02332
0.966212	1.02717	1.09577
1.17147	0.949684	1.64614
1.42637	1.2625	1.68053
1.34739		1.23595
1.35137	1.11393	0.975018
1.35527	1.13055	0.871217
		1.00107
0.972104	1.35766	1.14861
1.10253	0.966947	0.777796
1.0774	0.988064	1.22069
1.25864		1.04011
1.27952	1.24197	1.1107
	1.88133	0.882634
1.09169		1.00087
1.40115	1.51754	1.09482
		1.15773
1.07927	2.15623	1.61281
1.24035	1.2475
1.13026	1.17955	0.99653
	0.951782	1.27744
1.461	1.25691	1.18284
1.22619	1.44377	1.18325
1.32114	1.14164	1.26709
1.12035	1.03174
1.28972	1.29513	1.12092
0.951709	1.15907
1.25169	1.2758	0.974087
1.33107	1.174
1.10733	1.33845	0.831116
1.02416	1.1333	1.01318
0.874618	1.19457	0.843056
1.08878	1.37693	1.05643
0.896791	1.38618	1.08534
0.916254	1.11688	1.24885
1.27431	1.20617	1.09713
1.41086	1.35111	1.04991
	1.13366	1.09402
1.47262	1.08484	1.2176
1.87528	1.37219	0.894011
	1.19125	0.785695
1.3146	1.02592	1.07124
1.23279	0.874444	1.11949
0.925154	1.05759	1.09591
1.67669	1.43498	0.962735
	1.48618
0.891569	1.04368	1.15642
	1.19683	0.982123
1.04721	1.02057
1.19987	1.38755
	0.883623	1.10282
1.29764	1.02108	0.890524
1.33301	1.25254	0.957581
	1.05891
1.23273	1.00516
0.965525	1.14978
0.95776	1.23371	1.07987
1.74096	1.19165
1.18162	1.50566	0.98131
1.26142	0.943547	0.921651
1.2132	1.08508
1.34991	2.08724	1.07747
1.11474	1.28411	0.96158
	0.882345	1.07476
1.10023	1.29862
1.36487	1.24623
1.34001	1.38431	0.900833
0.907788	1.20389	1.41283
1.10339	1.08034	1.10715
1.1104	1.07672
1.18539	1.13923	1.07421
1.3586	1.15096	1.13968
1.09747	1.35632	1.39581
1.0771	1.61448
1.18216	1.40324	0.864293
1.03195	1.27053	1.03663
0.949022		0.84541
1.56141	1.22118	1.36523
1.20408	1.47726
1.2163	1.04146
1.15216	1.12732
1.1334	0.90667	0.781901
1.30896	1.03164	0.755491
1.22989	0.889596	0.949819
	1.72022	0.896156
0.907865	1.11058	1.04203
1.17666	1.16177	1.48805
1.01372	1.32789	1.03909
1.15661	1.30389	1.06271
1.38213	1.22845	0.999754
1.06702	1.39123	1.23148
1.04648	1.1913	1.00435
1.1418	1.31047
	1.26542
0.954029	1.23478	1.80665
1.21204	1.84556	1.3639
1.34642	1.43504	1.03028
1.24322	1.00897	0.923429
0.927444	1.6425	1.02588
1.02942	1.03424	0.898388
1.43661	1.17432	1.25977
1.26398	1.22712	1.00559
1.66753	1.21321	0.933475
0.972121	1.60083	0.925052
1.32528	1.42032
1.18598	1.16909
	1.29802	1.07682
1.08856		0.938774
1.12804	1.22703
1.03171	1.08234	0.992778
1.03843	1.01755	0.923514
1.10184	1.39962	1.1518
	1.31831	1.08707
1.22779	1.21831	1.16785
1.07053	0.985018	1.52868
1.27246	0.938691	1.20694
1.29038	1.16377	2.11398
1.15264	1.50028	1.06842
1.16041	0.921858	1.14812
1.28006	1.48511	1.34144
1.26055	1.13098	1.62159
0.959776	1.31758	0.866338
1.19397	1.16573	1.15914
	1.37689	0.910819
0.839821	1.23603	2.16726
1.18097	0.983107	0.804386
1.78463	1.51333	0.797404
1.36966	1.14752	1.25423
1.45987		1.88763
	1.36857	0.765002
1.18595	1.10407	0.999041
1.07958	1.43142
1.17477	1.04162	0.965021
	1.07191	1.39217
	1.3286	0.930692
	0.940566	1.30594
1.14776	1.218	0.942158
0.971977	0.88111
1.18998	1.15258	1.07084
1.44684	1.26729	1.04035
1.00012	1.597	1.10469
1.47811	1.14916	1.40428
1.08447	1.26662	1.00944
1.29557	1.00148	1.19169
	1.02481	1.08261
1.19518	1.14022	1.08037
1.26553	1.06508	0.820954
1.84212	1.6784	0.954232
1.32871	1.20129	1.05619
	1.10153	0.961868
1.25559	1.2354	1.06939
1.155	1.07022	1.01582
1.15202	1.20127	1.10527
0.98221	1.0684	1.19836
2.08431	1.09122	0.875837
0.88181	0.74641	0.872488
0.966528	1.02507	0.946297
1.06025	1.09444	2.0991
1.38833	0.982646	1.04181
1.08028	0.931385	0.966365
1.35528	1.03552	1.15886
1.36114	0.98011	0.955399
	0.933406	1.01115
1.27922	1.0423	1.06558
1.26909	1.37517	1.09051
1.16622	1.12345	1.18002
1.32034	1.19018	0.74886
1.40866	1.46507	1.1006
1.33567	1.25435	1.66424
1.18972	0.878646
0.954529		1.0331
0.969687	1.46241	1.47961
1.36044	1.06367	1.03758
1.15926	1.4457	0.929104
1.31575	1.14279	1.0311
1.14304	1.38806	1.01499
1.27023	1.33272	1.09006
1.1654	1.04398
1.2594	1.31665	1.06595
1.17029	1.15967	1.75828
1.02313	1.18671	0.925823
1.11959	1.20966	1.40418
1.47155	1.02788	0.918532
1.07812	1.31366	1.24409
1.65213	1.74702	1.04398
1.04709	1.34155	1.23461
1.1272	1.55205	0.963285
0.864133		0.888207
0.803896	0.84697	1.04561
1.15719	1.11795	0.872234
1.06706	1.56981
1.1995	1.72366	0.889417
1.41972	1.15172	0.897
1.15825	1.15145	1.27017
1.12723	1.18438
0.996903	1.51554	0.802151
1.62677	1.13577
1.30256	1.09724	1.37821
1.0533	1.18985	1.06195
1.00076	1.59177
0.901443	1.10866	0.946876
1.20588	1.21739	0.901337
	1.2531	1.4682
1.61269	1.37284	1.05195
1.23144	1.02551	1.06977
1.15408	1.81356	1.39991
1.31041	1.14648	1.04692
1.21253		0.937985
	1.17106	1.10811
1.27644		0.86544
1.00738	0.902127	0.925761
1.1408	1.13007	0.996328
1.37696	1.14565	0.964119
1.06324	1.30693	0.987097
1.43904	1.12397	1.03382
0.932561	0.948135	1.06281
	1.16061	1.33254
1.37751		0.728883
1.25412
1.34082	1.19642	0.920452
	0.93925	0.853083
	1.71193	1.24046
1.04451	1.25766	1.04124
1.30851	1.05139	0.880881
0.863915	0.991306	1.10685
1.11505		1.06715
1.60403		1.07379
1.19433		0.775979
1.40382	1.23277	1.14275
	0.858315	0.860891
1.36934		0.967543
1.36455	1.13325
1.13164	1.27885	2.12527
0.903861	1.14421	0.916397
1.13934	1.19295
1.12797	1.1156	0.841917
1.36892	1.26001	0.804575
0.972891	1.16317	1.0368
1.25669	1.00474	1.11876
1.17704	1.26438	1.30705
	1.15671	0.938671
0.911921	1.24341	0.933303
1.76612	0.846043	1.02391
1.14436	1.42447	1.10508
1.20216	1.26479	1.26055
1.31819	1.12152	0.926825
1.87578	1.13977	0.991605
1.17567	1.243
1.33757	1.28362	1.03599
1.75706	1.10851	0.845317
1.52047	1.42659	1.14721
1.19037	1.14252	1.18813
1.20175	1.23809	0.880092
1.06764	1.27347	1.00633
1.14628	1.63379	0.968087
1.28593	1.50139	1.09176
1.1806	1.24545	1.19439
1.00114	1.32944	2.02111
1.49724	1.37494	0.982515
	1.01278	0.970622
1.31427	1.198	0.925832
1.02815	1.11459
1.28556	1.31868
1.08004	1.0786
0.964276		1.06868
1.46767	1.02426	1.10405
1.50823	1.07616	1.28978
1.13736	1.60924	0.690277
1.08149	1.10752	0.876393
1.35656	1.23047	1.05315
	1.42943	1.11582
1.10293	1.28235	1.49325
		1.24874
1.27986	1.13699	0.875565
1.36058	1.33656	0.94922
1.13016	1.1787	1.11842
1.31256	1.48663	1.88877
1.10321	1.2043	1.14005
1.42878	1.36111	0.942368
1.21304	1.3166	1.55957
1.26205	1.32308
1.29224	1.25541	0.853023
0.864811	0.998788	2.08511
1.2794		1.53175
1.05227	1.5249	1.36875
1.29647	1.01486
1.38685	1.24327
1.2879	1.35935	1.10578
0.866232	0.897758	1.12045
1.16263	1.36941	1.01914
1.86231	1.1024	1.00382
1.07682	1.28919	0.947308
1.24504	1.28345	1.14446
1.05771	1.16532	1.02741
1.10734	0.996637	1.13782
	0.853639	0.859904
1.342	1.04911	0.854144
1.22272	1.14265
1.07367	1.31332	0.992705
0.918764	1.28399	0.962451
0.880968	1.23253	1.20826
	1.06193	0.9081
1.23108	1.05101	0.930795
0.998323	1.27005	0.952024
1.31569	0.923949	0.707049
1.29636	1.08091	0.784469
1.14909	1.05662	0.909813
1.07627	1.06775	0.934498
1.00216	1.09143
0.898914	0.951478
1.18137	1.19089	2.04788
	1.19366	1.11083
		0.962549
	1.19099	1.11065
1.05013	1.10188	0.891845
1.01582		0.951861
1.6788	1.16382	0.954526
1.24887	0.981011
1.31968	0.961488	1.26097
1.22444		1.50381
1.38602		0.760964
1.5407	1.22081
0.858166	1.1289	1.04785
2.08806	1.22063	1.34741
1.15502	0.957914
1.13484	1.20722
1.0082	1.36943	1.10526
1.09993	1.06626	2.09117
1.25618	0.859169	0.991441
0.883127		1.24022
1.21628	0.902055	1.11423
0.935191	0.988593	0.973573
1.12582	0.958895	1.03757
	1.65472	1.25904
1.06806	1.78143	0.832862
1.25736		0.996105
1.68181	0.806238	1.47648
1.10176	1.00911	1.01547
1.47448	1.36809	1.05331
	1.27162
1.10045	1.05117	1.16037
1.10721	1.00203	1.35674
1.32267	1.15378	0.92306
	1.1227	1.01614
1.12366	1.15594	1.09673
	0.91405	1.06625
0.958729	0.918859	1.03541
1.42238	1.31144	1.14754
	1.16375	1.27137
	1.03094	0.968492
1.31604	1.13544
1.26327	1.1187	0.910617
1.25333	0.84179	1.60942
1.16107	0.862521	0.8347
1.18683	0.762374	0.806426
1.23475	1.23504	0.966409
0.960596	1.10699
1.34444	1.38853	1.18012
		0.854992
1.21209	1.11766
1.1189	0.921833	0.7705
1.15682	1.14843	0.945996
	1.14257	0.938528
0.969264	1.08425
1.35102	1.30473	1.55638
1.19773	1.16102	1.01874
	1.45132	0.90628
1.14428	0.833206	1.19219
0.974851	1.1665	0.887528
2.01701	1.08386	0.980635
1.27387	1.01352	1.2489
	0.994641	1.04135
1.13084	1.08511	0.981938
	1.03903	1.03425
2.15157	1.13188	0.939277
1.13969	0.884044	0.934505
1.03665	1.17984	0.736144
1.48236	0.871657	1.1149
1.37345	0.968091	0.797877
0.961242	1.23374	1.1111
1.21521	0.90436	1.20908
1.23738	1.11013	1.45438
1.30666	0.785591	0.952183
1.35136	1.15802	1.09911
0.865962	1.11168	1.26433
1.3594	0.762375	1.02713
1.06447	1.24018	1.13678
1.32911	1.25945	1.11803
1.21987	1.33954
1.1268	0.972806	1.04963
1.35916	1.28788	1.05227
1.47974	1.20399	0.98471
1.29211	1.12541	1.10404
1.31512	1.0156	0.799252
0.870493	0.794636	0.907153
1.24032	1.77744	0.91211
1.38588	1.00065	0.763224
1.38099	1.26612	0.972977
1.26317	1.12835	1.26171
0.946126	1.16796	0.92638
1.47184	1.13279	1.00129
1.38355	1.27184	1.14076
1.17826	1.00176	0.900038
1.34404	0.99632	1.03354
1.03506		1.16006
1.0206	0.832854
1.35906	1.01032	0.690082
1.01967	1.17613	1.43018
	1.08642	1.02935
1.45622	1.12405	1.00971
1.68488	1.14472	1.14745
1.48121	0.943312	1.02577
1.59998	1.23781	0.984483
1.31565	1.12069
1.4291		0.99592
	1.24943	0.652788
1.24502	1.62715
1.09953	0.930616	0.939463
1.2855	1.44004	1.02975
1.28833		1.1187
1.10686	1.10072	1.27561
	1.35402	0.907161
1.35686	1.08507	1.28777
1.07252	1.27857
1.21442	1.16516	0.987704
1.19654	0.808081	1.14082
1.39725	1.22246	0.932206
1.09403	1.1114	1.31896
	1.08111	0.749524
1.23545		1.12773
0.969104	1.0285	1.26117
1.25825	1.06507	0.712167
1.72679	1.0227	1.23645
0.920001	1.13386	0.838701
	1.306	1.29987
1.13862	1.14897	1.16228
1.26386	1.05656	0.910463
1.1819	1.0775	0.887262
1.16496	1.1521	1.32618
1.24637		0.880887
1.13972	1.125	0.755908
1.27738		0.913976
		0.823832
1.27112	1.27005	0.949937
1.11083	1.09922	0.87575
1.14725	1.436	1.07832
1.01244	1.32704	0.877528
	1.2676	0.922871
1.21962	1.2478	1.0232
1.02403	1.32755	1.10637
1.06764		0.99823
1.44304	0.920995	1.23729
1.2804	1.17824	1.02316
1.00221	1.16641	1.11824
	1.13557	0.853759
1.0351	1.40784	1.07434
0.828091
0.967005	1.01966	0.985169
1.2044	1.11171	1.15861
1.2258	1.58926	0.897927
		0.668786
1.27671	1.00779
1.0237	0.950863	1.0112
1.48856	1.08021	0.897726
1.37164
		0.833694
1.08917	0.980237	0.768025
0.919553	1.22741	1.55599
1.30449		0.95513
1.27583	1.0581	1.1557
1.1686	1.25188
1.04479	1.33327	1.06705
0.97001		1.54317
1.01852	0.995057	0.777529
1.01624	1.06466	0.673575
1.10782
1.21751	1.19093	1.07337
1.14217	1.18308
0.948294	1.42	1.24348
1.60509	1.39442	1.11674
1.10479	1.16111	1.04434
1.32035	1.09773
1.5958		1.20978
1.5097	0.923354	1.32557
1.67039	1.86104
	1.34199	1.31268
1.11288	1.03923
1.32422	1.31237
1.16302		1.40177
1.49888	1.04965	1.27902
1.17056	1.02834	1.00062
1.29321	1.14553	1.28451
1.02964	0.955976
1.24788	1.06613	1.55282
1.49508		1.18031
0.979881	1.26576	1.32232
1.28111	1.17958
1.15769	2.09594	0.806165
1.27647	1.18996	0.9167
0.924847
1.15127	0.910482	0.910431
1.15968	1.42329	1.37799
1.11312
1.19905	0.954335	1.33928
1.13295
1.27066	1.64304	0.822667
1.74277	1.14399
	1.36704
1.1216	1.04326	1.28971
1.32465	1.01067	1.03174
1.25237	1.02827
		1.37691
0.928044	1.24874	0.983523
1.03977	1.09343	0.938223
		0.878009
1.39457		0.649497
1.23917	1.29316	0.998972
1.31262	0.946319	0.79908
1.42507	0.785692	1.0872
0.966418		1.0283
1.15629	1.022	1.03275
1.19791	1.25012	1.00748
1.06285	0.796575	0.941107
1.47802	1.15819	0.996964
0.81862	1.30307	0.952119
0.95752	1.05286	0.689007
1.08506	1.05074	1.1872
0.993588	1.21188	1.11421
1.21107	1.2417	1.11664
1.84767	0.783195	1.06537
1.15042		0.983865
1.56999	1.15425	1.11029
1.13049	1.22492	1.14829
1.28045
	1.41451	1.69616
1.10106	1.05889	1.13881
1.29462
0.940098	1.20039	0.929387
1.19183	1.00879	1.86371
	1.15567	0.785112
1.06711	1.13019	0.782928
1.6356	1.20949	1.0716
1.23783	1.35571	1.08287
1.28419	1.07413	0.914152
1.40677	1.10691	0.860085
1.4136	1.0565	1.24589
1.08266	1.22584
1.26114	1.28479	1.07409
0.964517		0.697073
1.21841	1.34956	1.04821
1.17356	1.20821	0.977011
1.12447	0.941932	1.01751
1.19627	1.27154	1.17654
1.29001	1.18951	1.08138
1.04061	1.17099	1.14891
1.21143	1.32248	0.776502
1.74512		1.22097
0.873096	0.975955	0.975767
1.14059	1.22382	1.51465
1.1245	1.25547	0.859332
1.07487	0.856315
1.13713	1.10451
1.35585	1.03777	0.85961
1.19939	1.07723	1.09502
1.02089	1.27858	0.740339
1.15042	1.08142	0.898317
1.48686	1.17401
1.04762	1.18797	1.07046
1.25126	1.11072
1.58154	1.22267	1.13976
0.933747	1.22686	1.07735
0.994884	1.25013	1.05475
1.16858	1.26071	0.93522
1.44432	1.3228	0.872852
1.17906	1.06521	1.33225
1.31903	1.05255	0.875685
1.06933	0.945898	1.42699
1.22576	1.09611
	1.27356	1.09361
1.25412	1.42687	1.09112
0.880149	1.10799	0.942023
0.831541
1.06104	1.15594	1.09869
1.06192	1.27982	1.10356
1.20291	1.08249	1.65105
1.07322	1.06364	0.932925
1.46709	1.02543	1.13488
1.10514	1.20175	0.983111
1.35397	0.924709	0.870704
1.41208	1.39041	0.822346
1.07275	1.28788	0.974385
1.22973	1.24887	0.879957
1.08957	1.23829	1.07339
		0.940589
1.46712	1.14039
1.13171	0.931206	1.03156
0.889523	1.44868	0.817001
1.28509	1.31648	1.1739
0.865399	1.25738	1.00913
1.06378	1.22184	1.09455
1.22561	1.47823	1.09797
1.57048	1.10749
1.17525	1.05015	1.09352
1.34137	1.09232	1.11793
1.01165	1.28366	1.09659
	1.15102	1.13674
1.46156	1.00085	1.03087
1.08314	1.10401	0.815846
1.3085	1.16183	1.07851
1.21148	0.952097	0.770407
	1.25652	1.35956
1.35591		1.33248
1.33448	0.797505	0.794767
0.939597	1.1513	1.00488
1.23513	1.12656	1.12896
1.47031	1.4787
1.20663		1.15657
1.08728	1.40454	0.91775
1.10748	1.29966	1.09753
1.18819	1.19665
1.12135	1.02578	0.994338
	1.36	1.41324
1.11242		1.248
1.35344		0.956424
1.0107		0.909091
1.74905		0.982735
1.21805		0.934766
1.31009	1.01657	1.07397
1.10159	0.925826
1.49738	1.76275	1.08519
1.09879	1.13654	1.2636
1.07194		1.06285
1.18849	1.39855	1.34852
1.09666	1.20679	0.995486
1.25127		0.795774
1.29457	1.20421	1.36421
0.950067		0.940276
0.874624	1.46258	0.953528
	1.0738	0.981864
1.22952	1.13128	0.825011
1.41448	1.59123	0.986844
1.20071		0.947142
1.2635	1.10425	0.867918
0.966617	1.36147	1.11767
0.981366	0.871702	1.12008
1.03365	1.06391	0.970532
1.08772	1.24251	1.0244
1.30789	0.945401	1.01312
0.944205	1.2045	1.13318
0.989281		1.12062
1.06261	0.97529	1.01066
1.08889
1.27066		1.0058
1.08194		1.08591
1.20879	0.837225	1.18047
1.50476		1.03912
	0.760319	1.14212
1.12229	1.49091	0.94291
1.10018	1.14186	1.73437
1.26947	0.837579
1.18412	1.12653
	1.02922	0.872027
0.835809		0.736704
1.48951	1.43659	1.09544
1.09145	2.19495	1.23186
1.35692	2.19902	1.06538
1.17076		1.06454
1.26199	0.916274	1.02886
	1.22116	1.04655
1.2741	1.43874	0.869824
1.05457	0.867616	0.95722
1.13466	1.13388	1.22877
1.15397	1.33728	1.35372
1.11825	1.22282	1.01338
2.00732		0.795049
1.51458	0.798667
	1.09769	1.04566
1.02249	0.990213	1.11544
	1.17708	1.09442
1.11437	1.29136	1.15986
1.22033	1.22029	1.04689
	0.882715	0.826255
1.02841	1.50214	0.954466
1.15899	1.15385	0.937113
0.992641
1.41157	1.2945	0.904702
1.25275	1.15109	1.3782
1.69826		1.19674
1.03938		1.06113
1.42134	1.11718	1.05572
1.22553	1.04145	1.06869
0.995823	1.24836	1.47748
1.00748		0.886107
1.20031	0.858038	0.840675
1.34546	1.04142	0.933304
1.17999	0.943236
1.03677	1.46022	0.899848
1.0642	1.21184	1.0718
1.09817	1.37125
1.19247	1.0211
1.30539
1.84153		1.13433
1.25011	1.17546	1.16556
1.57606	1.47611	0.735827
1.29765	0.969251	0.967183
1.20236	1.55185
1.10156	0.898244	1.08073
1.1579	1.18947	0.80293
1.40159	1.01382	1.48068
1.33956	1.4303	1.00101
1.44757	1.06011	0.984092
1.29729	1.27901	0.873364
1.18994	1.05437	1.46297
0.990278	1.04055
1.27768	1.14889	0.90183
1.26045	1.29594	1.21465
1.32844	1.26025	1.04323
1.10683	1.10118
1.08467	1.31423	1.03644
1.09911	1.22879	1.01339
1.09636	1.23008	0.980381
1.08403	1.22852	1.9596
1.21422	1.85265	0.992712
1.93564	1.31035	1.08832
1.22271		0.967713
1.35401	1.40619	0.742322
1.35398		0.862933
0.99699	1.10559	0.787727
1.79071	1.1484	1.06826
1.34492	1.06823	0.997917
1.03872	1.16895	1.12904
1.0499	1.04963
1.00005	0.897472	1.05517
	0.83276	1.98272
1.58442	1.13032	1.46127
1.64258	1.03464	1.10545
	1.15379	0.925431
1.2093	1.31149	0.877872
	1.39242	0.773049
0.813701	1.24012	1.17628
1.02471	1.13545	1.07515
1.08204	0.973774	1.01655
1.20634	1.47733	1.07951
1.25135	1.05181	1.13532
1.16595	1.04236	0.865343
1.36738	1.26075	1.08788
1.09281	1.0444	0.979844
1.83457
1.01575	1.12176	0.981526
1.81726	1.18233	0.912751
0.878544	1.1115	0.942921
1.14899	1.39748	1.16281
1.33688	1.32705	0.879816
	1.0254	1.02331
	1.45543	1.042
1.87672	1.1535	1.0185
1.02023		1.00475
1.13839	1.13825	1.20318
0.948428	1.42512	0.803212
1.46008	1.0931
1.53409	1.28734	0.938293
1.14627	1.05975	1.07226
		1.01795
0.981633	0.960334	0.74468
	1.28588	1.09275
1.0331	1.02248	0.994871
1.15649	0.98018	0.83303
1.42411	0.906406	0.981123
1.15996	1.39369
1.13321	1.0256	0.864827
1.2383	1.07275	1.0447
1.24514	1.21067	0.873113
1.66809	1.04962	1.0352
1.2318
1.25685	1.19424	0.907417
1.81982	1.65792	0.920409
1.69021	1.09833	1.0813
1.11106	1.19281	1.34166
1.53473	1.44766	1.01485
0.82934		0.951119
1.22772	1.32285	1.60363
1.18323	1.06932	0.921024
1.42635	0.889695	0.943157
2.08501	1.1965	1.14808
1.3919
0.968484	1.23831	0.950442
	1.38778
1.18375	1.37156	1.0044
1.25679	1.31426	0.945443
0.843929	1.41408	1.1486
1.39233	1.4056	0.9703
0.889788	1.17201	0.713584
1.40686	1.02565	0.915837
1.27139	1.12933	0.973289
1.07473	1.30702
1.14752	1.39354	0.806106
1.36414	1.21072	1.02786
1.282	1.58455	1.63411
1.25851	1.29822	0.886392
1.27792	1.14554	0.928747
1.19504	1.01031	1.04279
1.31503	1.25568	0.949995
1.21669	1.41179
1.4893	0.948712	1.18075
1.0569		0.868327
1.24674		1.06607
1.2814	1.12441	1.15587
1.31821	1.00831	1.15798
1.24911	1.32306
	1.10015	0.915931
1.29072	1.10609
1.09328	1.31894	0.939222
1.79645	0.943344
1.26287	1.32955	1.17956
1.11714	1.27976	0.852318
1.82567	1.07983	0.961828
1.20163	1.93907	1.10667
1.361	1.12854
	0.931979	1.06975
	1.2429
1.26772	1.13206	1.12312
1.20052	1.38477	0.803225
1.30726	1.21403	0.916558
1.20091	1.41047	1.00858
1.41955		0.998009
1.39605	1.52317	0.783149
1.04134	1.42215	0.970296
1.24557	1.29392	1.01481
1.61476	1.08719	1.17016
1.09172		1.0049
1.18277	1.04139	1.07162
1.16833	1.11527	1.03387
1.87495	1.28312	1.00362
1.0692	0.946729	1.00214
1.44598	1.22349	1.18951
1.12223	1.27629	0.915659
1.25383	1.024	0.865985
1.04316	1.13368	1.42344
0.993517	2.10454	0.906207
1.27528	1.15762	0.951579
1.22383	1.41285	0.933955
1.07119	1.52238
	1.27529	0.939472
1.06874		1.18633
1.40007	1.19602	1.8365
1.37988	1.33697	0.901497
1.50385	1.52713
	1.66855	0.966975
1.09602	1.0096	0.960536
1.31853	1.19574	1.01576
1.43603	1.03615
1.31088	0.975828	1.05323
1.21459	1.20668	1.04308
1.79191		0.927848
1.4247	1.3069	1.25584
	1.24982
1.21022	1.59017	1.90507
	1.27315	1.04272
0.867965	1.36422	1.16932
0.949483	1.21251	0.911917
1.40649	1.25603	0.965992
1.61897
1.43497	1.22866	1.0753
1.42368	1.52265	0.981955
1.43368	1.55334	1.3234
2.08139		0.956331
1.27477	1.10714	1.01358
0.819546		0.927619
0.963143	1.22338	0.772082
0.852362	1.46819	1.05883
1.2349	0.94316	1.03886
0.989438	0.86987	1.12176
1.4012	2.12529	1.11336
1.68731	1.08242	1.12477
1.29344	1.24169
1.00618
1.12607	2.11456	1.57908
1.29197
1.71474	1.1723	1.15486
		1.75118
2.08081	1.20068	1.12333
1.06072	1.12815	1.19609
1.08999	1.09857	0.896681
1.07632	1.625	1.1108
1.67913		0.737972
1.42261	0.925164	0.968315
1.32028	1.21517	0.861398
0.882193	1.03997	0.93331
1.49053	1.18636	1.03608
1.11716	1.26171	1.0157
1.68991	1.28263	0.77323
1.46205	1.17775	1.13484
1.46984	1.32518	0.961247
1.3017	1.04376	1.07841
0.875152		0.831447
1.32072	1.28644	1.03001
2.15594	1.27825	0.897336
	1.33597	1.0331
	1.6903	1.10396
1.00566	1.26305
1.25538	1.1919	1.13486
1.21379	0.846954	1.08877
1.43405	1.28534	1.28841
	1.13515	1.07186
1.62166	1.05315
1.0947	1.21116	1.0398
1.51478	1.2556	0.830395
1.10224	1.20143	1.14492
1.30587	1.09047
1.3224		1.00724
1.10386		0.931761
0.938321	1.18888	1.03286
1.12726	0.949135	1.11531
1.53001	1.15636	1.02584
1.18953	1.20481	0.824147
1.3263	1.1015	0.999558
1.13352	1.10658
1.15165	1.09615	1.08438
1.24533		0.793776
1.51998	1.09533	1.09225
1.1479	1.94981	1.12057
1.1303	1.40358	1.20368
1.22499	1.1596	1.09495
1.18497
1.29242	0.796379	1.06971
1.60066	0.982788	1.21423
1.16904	1.09184	0.850067
1.36549	1.07404	0.808576
1.03955	1.07902	0.991395
1.05568	1.10794	1.21277
1.08994	1.49359
1.43218	1.01858	1.21968
1.08639	1.0272	1.128
1.30385	0.957001	1.21751
1.14367	1.14931	0.787132
1.22652	1.48374
1.17282	1.06581	1.09844
0.816842	1.24956	1.04961
1.32766	1.26383	0.978255
0.941448	1.05026	0.912233
	1.31407	1.19549
	1.18416	0.998183
1.33371	1.17346	0.94522
1.4611	1.12802	1.08957
1.1533	1.14251	0.871837
1.05331	1.0078	1.03865
1.06502	1.29104	1.1462
1.11764	1.1744	0.929341
1.16527	1.11362	0.979563
1.10227	1.46907	1.30369
1.08948	0.969076	1.32363
1.61424	1.54833	1.90908
1.07675	1.19203	1.16528
1.03232	1.11727	0.979442
1.13475	1.07247	1.0126
1.4522	1.12224	0.908718
1.63026	0.970677	1.05999
1.58695	1.07221
1.623	1.1798	1.02747
0.889574	1.10341	1.74053
0.815052	1.2825	1.01364
1.25296		0.999828
1.50921	0.757244	0.958441
1.85244	1.56381	0.963728
0.994014	1.06102	0.865101
1.58878	1.27553	0.810917
1.29012	1.13027	1.08896
1.46325	1.3686	1.27546
	0.963197	1.14963
0.805724	1.2189	0.80975
1.24066	0.947675	1.06643
1.07456	1.04664	0.999993
1.05728		1.17403
1.63707	0.927776	1.29461
1.05907	1.00062	1.09493
1.41215	1.12239	0.76857
1.14257	1.38758	0.89021
1.11053	0.967678	1.12759
1.20263	1.05747	0.843047
1.51536	1.08938
1.34697	1.10743	1.01313
1.04001	1.17365	1.08825
	1.06136	1.05966
	1.31949	1.0842
1.72559	0.986618	1.08735
0.999716	1.35287	1.10089
1.19769	1.07687	1.0106
0.955397	0.951476	0.864764
1.10644	1.04102	1.0139
1.65051	1.22415	1.14159
1.04445	0.903091
1.25004
1.38057	1.23596	1.46631
2.23521	0.925953	0.937377
1.39513	1.15077	1.02568
1.34516	1.35465	1.05849
1.59114	1.15688	1.11089
1.12254	1.30527	1.2009
	1.44813	1.38356
0.94218		1.1469
	1.13823	1.01248
1.40839	1.14357
1.20842	1.58643	1.14236
1.09853	0.997697	1.04273
0.865732	1.30301	1.25749
0.986669	1.91844	1.19206
1.08593	1.46381	1.72883
1.63515	1.34382
1.28649	1.30837	1.45092
1.69322	1.22857	1.11074
	1.38025	1.10027
1.51765	1.27292	0.918996
1.32753	0.759552	0.919776
0.943912	0.917571	1.04615
1.40537	1.16393	0.888938
1.23974	1.5658	0.996449
1.1416	1.07758	1.07066
1.1296	1.2384	1.06671
1.33661	1.18267
1.04651	1.24116	1.01096
0.943603	0.95118	0.995729
1.35654	1.74801	0.852351
1.49249	1.2428
1.40528	1.4705	0.795071
1.6898	0.994358	1.44855
1.31577	1.12865	1.35931
1.33671	0.931189	1.72276
1.25969	1.17769	1.0445
1.18977	1.36688
1.05546	1.1595	0.907459
1.20763	2.107	1.27294
	1.4146	1.01565
1.42071	1.18051	0.922085
1.455	1.37059	1.31971
1.89707	1.46737	1.18451
1.40412	1.10501	0.99992
1.33494	1.5808
1.54637	1.25603
1.50868	1.20293
1.35476	1.20993	0.961006
1.0425	1.10022	1.15301
1.28224	1.05954	1.04782
1.39503	1.25719	0.868616
1.47756	1.29798	1.07924
0.926015	1.26719	1.17705
	1.15018	1.16966
1.2874	1.22987	1.58515
1.15565	0.969005
1.4082	1.324	1.02893
1.16112	1.35828
0.908561	1.23193	0.854366
	0.841937	0.925401
0.99797	1.34209	0.684452
1.11243	1.29891
1.18289	1.27245	1.01764
1.14798	1.22054
1.29379	1.20315
1.13526	1.01738	1.9746
0.99456		0.925913
0.948024	0.884608
1.12816	1.30697	0.863249
0.932094	1.61786	0.953952
1.45475	1.2615	1.25768
1.31789	1.26975	1.08516
1.16915	0.945535	0.96049
0.985784		0.917427
2.11867	1.05775	0.886001
	1.05602	1.18793
0.963774	1.33552	0.991157
1.28662	1.08532	1.15389
0.913418	1.02967	1.06202
1.34193	1.74509	0.757133
1.45072	1.74879	0.927171
1.0609		1.30157
0.895761	0.988135	0.914677
		0.818012
1.01797		0.787385
1.46086		1.14719
1.49776		1.00038
1.04819		0.869733
1.23454		1.83395
1.18985		0.975443
1.11727		0.765449
1.34786		1.16206
		0.819861
1.03831
1.03581		0.747944
0.899431		0.880642
1.16813
1.5337		0.882777
1.70579
1.16265		1.02968
1.22394		0.842855
1.64764
0.962199		0.980364
		0.796422
0.887189		0.958232
2.24424		1.79154
1.53881
1.25518		0.974092
1.22715		0.793329
1.19642		1.07163
1.1804		0.986577
1.21458
1.32692
1.23226
0.926081		1.04259
0.953185		1.0173
2.26269		1.01771
1.00904		1.14119
1.05573		1.04306
1.55947		0.929251
		0.854782
0.9269		0.835889
1.06313		1.26899
1.16644		0.816136
1.29387		0.91945
0.93613
1.10835
1.09634		0.965336
0.914389		0.943969
		1.92763
1.11699		0.726935
1.12559		1.66497
1.12811		1.19599
1.13274
1.69476		0.866208
1.12086		1.53638
		1.72831
1.03717		0.984279
0.899768		1.12571
2.19256		1.0395
1.02792
0.941559		0.971583
1.12102		1.22401
		0.851488
1.1256		1.02813
1.21363		1.14122
1.0558		1.05434
1.12588		1.09509
1.30957		0.761838
1.40199		0.800889
2.13945		0.962747
1.10273		0.968237
1.30891		1.14349
1.15718		0.991179
1.21502		0.977739
0.901405		0.79826
1.30961		0.887183
1.08354		1.09383
1.12928		0.96091
1.25931
1.08961		0.950186
0.975144		0.880077
1.32425		0.96692
1.3049		1.05116
1.78568		1.05933
1.46864		0.809622
1.00499		1.29653
0.886861		1.04635
1.30933		1.00238
1.76935		1.14322
0.968357		0.882925
1.07375
0.973987
1.12343
1.38831
0.922095
1.09086
1.27324
1.2545
1.43159
1.21348
1.12837
1.06511
1.41795
1.0226
1.29739
1.15674
1.0926
1.32304
1.01202
1.5143
0.932605
1.42765
1.16412
0.816465
1.77764
0.95396
1.02156
1.26552
1.25816
1.16524
0.933079
1.156
1.37047
1.13092
0.904655
1.1361
0.934148
1.34893
1.01074
1.27585
1.02402
0.843075
1.81207
1.03861
1.376
0.999324
1.20398
1.10525
1.42121
1.48064
1.13558
0.916525
1.32292
1.29272
1.26785
1.31912
1.16371
1.34579
1.21216
1.27134
1.23472
0.950603
2.06853
1.23145
1.22295
1.0352
1.45949
1.87187
1.33169
1.23671
1.83551
1.23316
1.04891
1.13593
1.26339
1.12285
1.24227
0.999339
1.39388
1.25687
1.00265
1.54309
1.53122
1.31364
1.24181
1.24587
1.10457
0.859764
1.08409
0.851989
1.14423
1.06881
0.952146
0.907135
0.86058
1.3841
1.29189
1.20662
1.34583
1.3876
1.33909
1.05027
2.18782
1.20947
0.878406
0.940297
1.37459
1.19933
1.14926
1.14052
1.48557
1.04628
1.01299
1.04076
1.07682
1.1522
1.56309
1.30104
1.17542
1.22557
0.965688
1.13939
1.2601
1.46486
0.969354
1.83287
1.26593
0.980978
1.15668
1.20911
1.3796
1.05409
0.816356
1.20033
1.38706
1.08973
1.05941
1.2233
1.26529
1.3231
1.02562
1.19515
1.38768
1.29443
1.06121
1.12775
1.27928
1.14804
0.861104
1.11216
1.24352
1.1079
0.984221
1.47287
1.39713
1.33922
1.21669
1.00862
1.13326

## Sheet: TFEB_ENDO 30min torin2 respons
TFEB_ENDO; 30min torin2 response
vehicle	2.5nM Torin2	100nM Torin2
	0.903826
1.02397	0.793379
1.17099	0.694573	0.627025
	0.726166	0.672194
	0.941488	0.704335
0.840294
0.991867	0.671073	0.64502
1.09952	0.943124	0.66646
0.944405		0.715216
0.968885	0.96547
0.913803	0.67379	0.837649
0.889997	0.964414	0.583641
0.87335	1.04617	0.72696
0.934132	0.758115	0.646126
0.823009	1.02811	0.636369
0.96977	0.817821	0.665613
	0.900865	0.899467
0.904362		0.695963
	0.775543	0.701923
0.880439	0.939027
0.906482	0.716826	0.583798
0.953826	0.775398	0.694599
0.878022	0.903243	0.725212
0.98783		0.748469
0.802439	0.708448	0.64362
1.10294	0.865134	0.610037
0.853374	1.01396	0.926381
0.717288	0.962951	0.795243
0.978011	0.973101	0.764455
0.872666	0.846579	0.590875
0.94396	0.892373	0.843166
0.838075	0.953968
0.888872	0.893222
1.1046	0.9601	0.754678
1.01452	0.938023	0.658632
1.12594	0.902984	0.751069
0.848565	0.884653	0.68766
0.891282	1.00898	0.773299
0.915632	0.96509	0.649129
0.772487	0.981278	0.555212
1.13744	0.994413	0.666982
1.09546	1.03763
1.06998	0.985774	0.768621
0.879973	1.02283	0.77482
0.949833	0.790391	0.793237
	0.680897	0.591484
0.686745	0.81511	0.857558
	0.892929	0.731427
	0.656613	0.695891
0.787135	0.694511	0.739389
0.748566	0.865313	0.941787
		0.718919
0.821755	0.909889	0.628018
0.90506	0.942179	0.773038
0.783864	0.967955	0.610083
0.806522	0.874637
0.858575	0.649889	0.649166
1.23393	0.734169	0.689405
0.660438	1.00597
0.953493	0.787316	0.703952
1.04317	0.782165	0.766081
	1.04977	0.71369
0.900245	0.825131	0.877429
0.772705	0.965205	0.735864
0.696365	0.828682	0.823207
0.711842		0.733132
0.87271	0.639467
0.956519	0.829086
1.1969	0.845321	0.875928
0.923333	0.914745	0.769267
0.901292	0.942722	0.725428
0.842777	0.968893
0.952933
0.879111	0.714282	0.712212
0.812482	0.826183
1.03543		0.80506
0.959849	0.827752
0.744667	0.941992	0.701655
0.834134		0.722616
1.10228	0.905449
0.763599	0.919526	0.660275
0.750437	0.728817	0.677407
	0.951707	0.831377
0.929192	0.913185	0.736331
0.962153	0.962571	0.851249
0.702142	0.80318	0.72339
1.01193	0.79733	0.720778
0.788264	0.698159
	0.658882	0.695131
0.859265		0.740697
1.04273	0.960968	0.613146
0.933701	1.02049
0.908651	0.922083	0.677706
0.918459	0.981326	0.740252
0.961687	0.786449
0.792412	0.756867	0.806065
1.02101	0.986426
0.705885	0.869742
0.854142	0.865887	0.613922
0.969667	0.782336	0.625444
0.822314	1.04129	0.660199
1.02863	1.00713	0.71437
1.11778	0.972299	0.668604
0.837497	0.891301	0.633292
0.962829	0.814008	0.724599
1.0159	0.829066	0.646923
0.830743	0.918426	0.652844
0.784421	0.99252	0.715071
0.761134	0.96275	0.841575
0.993859	0.73634	0.806228
0.927538	0.973548	0.75968
1.01485	0.866239	0.718532
1.03386	1.04399	0.550888
0.89178	0.770634	0.80447
1.03514	0.764119	0.732815
1.05158	1.01106	0.696864
	0.837783	0.701849
0.839084	1.04027	0.724924
0.759057	0.930822
	0.783413	0.779176
0.993623	0.716152	0.800967
0.802052	0.977119	0.768435
1.07433	0.904924	0.767288
0.834869	1.03648	0.760681
0.791768	0.995521	0.834749
0.745953	1.02333	0.789638
	0.877411	0.709786
0.929044	0.965762
0.690429	0.932936
0.822277	0.767431	0.722162
0.917422	0.718075	0.842845
	0.718314	0.718869
0.814892	0.857652
0.829643	0.836249	0.724092
1.06025	0.81151	0.854428
0.869927		0.874926
0.817435	0.82056	0.612802
0.736486	0.826029	0.664556
0.916055		0.72576
0.919017	0.733142
1.08327	0.770223	0.715696
	0.851831	0.752608
0.786536	0.81882	0.646578
0.901759	0.790339
0.911007		0.796419
0.931592	0.944891	0.558675
0.835242	1.0385	0.696856
0.974334	0.840366	0.787342
0.80067	0.844988	0.656432
0.825998	0.94934	0.898326
1.00766	1.00006	0.879295
	0.977283
0.731711	0.687481	0.794643
0.711362	0.771137	0.684738
0.993253	0.983315	0.748044
	0.760223	0.78677
1.05769	0.825819	0.876053
0.840746	1.00943	0.670982
0.805559	1.12735	0.661081
	0.852322
0.970428	0.821882	0.753701
0.934309	0.798877	0.839757
0.909029	0.964929	0.657642
1.01492	1.20234	0.737338
0.825574	1.09486	0.726347
0.678362		0.591773
0.985356	0.957777	0.717427
0.884921	0.976975	0.735524
0.857511	0.874367	0.726195
1.12242	0.885595	0.584029
	0.884257	0.7909
1.01783	0.805491	0.891618
1.07711	1.0292	0.618025
0.966375	1.07938	0.750867
1.28221	1.03509	0.768881
0.965931	0.679055	0.639067
0.857765	0.759684	0.616553
	0.907229
0.907507
0.995752	0.993065	0.740449
1.14771	0.880191	0.580722
0.939719	0.669479	0.637173
0.90295	0.90702
0.747109	0.822235	0.706887
0.853246	1.15301	0.671497
0.76293	0.763877
1.11069	0.92099	0.77318
1.13737	1.04988
0.940806	0.985151	0.762412
0.890546	0.757496	0.584166
0.939356	0.906214	0.717698
0.996814	1.08994
0.894737	0.714926	0.782805
1.00525	0.843972	0.703538
0.952364	0.889234	0.745973
0.859327	0.732355	0.818706
0.963105	0.888789	0.752776
1.106	0.887163	0.67016
1.26438	0.762406	0.63407
0.929131		0.661892
0.89008	0.846835	0.801912
1.06288	0.771333	0.851718
0.867995	0.816021	0.742595
0.765721	0.791442	0.782876
0.828379	0.926842	0.869796
1.09215	0.882902
0.919282	1.10884	0.718536
0.834021	0.906107	0.785147
0.806692		0.875355
0.884674	0.79073	0.747068
0.753716	0.948296	0.591083
0.854277	0.729084	0.984026
0.84739	0.798866	0.740288
0.860464		0.759618
0.927353	0.926208	0.646197
0.999679	1.11364	0.702783
0.710242		0.845357
0.864924	1.09023
0.779542	0.922624
	0.823459
0.905805		0.695196
0.948613	1.0137	0.886447
1.22351	0.93279	0.707531
0.878929	0.938666
1.05227	0.877282	0.873243
0.921957	0.794628	0.759378
	0.73514	0.972607
0.933178	0.724441	0.866993
0.993639	0.876229	0.811094
1.11142	0.839484	0.582426
0.897408	0.901404	0.676921
0.797097		0.826298
0.817489	0.885335	0.663622
0.956588	1.00031
0.921793		0.681244
1.09479	0.882329	0.738604
0.874211	0.908022	0.925286
0.947633	0.92903	0.718343
1.16162	1.1686	0.826981
0.946895	0.809097	0.662913
0.805559	0.809438	0.597845
0.687048	1	0.672057
0.968885	0.776203	0.680642
0.92511	0.972975	0.696475
0.902109	0.976813	0.608764
0.984789	0.831794	0.853044
0.893789	0.946283	0.716463
1.01322	0.977518	0.589157
0.814815		0.696848
0.849019	1.0968	0.649133
0.951298	1.04053	0.762818
0.811196	0.771213	0.545493
0.970037	0.97738	0.612288
0.766304	0.902417	0.655582
0.818787	0.699096
	0.802856	0.734193
1.04648		0.684854
0.853779	0.741383	0.689443
0.713744	0.738104	0.688139
1.00949	0.957791	0.657169
0.904901	0.692904	0.601807
0.894589	0.768221	0.667377
1.04084	0.772384	0.648081
0.711171	0.975183
1.07261	0.697628	0.729408
0.74607	0.867003	0.729001
0.85131	0.775214	0.647361
1.099	0.906321	0.625886
0.850197	0.877923	0.612031
0.74341	0.935465	0.655926
1.11654	0.644355	0.702771
1.16759	0.993144
0.869291		0.714215
0.878368	0.872051	0.698475
0.76778	0.704168	0.680839
0.801751	0.748039	0.731928
1.00979	0.970474
1.10048	1.04099	0.749606
1.10923	0.802052	0.597758
0.911661	0.814123	0.698536
1.11869	0.862989	0.73021
0.753946	0.852228	0.766373
0.727269	0.916307	0.604931
0.919532	0.861745	0.755872
0.978728	0.885008	0.817501
0.992269	0.896805	0.786931
1.0885	0.659576	0.549154
0.814842	0.723309	0.704966
0.864736	0.702657	0.640642
0.944944	0.718004	0.619989
0.981177	0.801685	0.651453
0.943889	0.948455	0.902839
1.03029	0.650397
0.790961	0.893823	0.62127
0.880178	0.867755	0.627625
0.812981	0.749656	0.669157
1.03825	0.65848
0.879465	0.893311	0.738061
1.03002	0.713503	0.716169
1.05301		0.589946
0.820454	0.71161	0.746089
0.994736	0.891445	0.67343
0.914518	0.805433
0.882185
1.13677	0.818194	0.92805
0.73319	0.882423
0.935938	1.0104	0.622679
1.05049		0.721854
0.90249	0.889789	0.620819
0.913032	0.929998	0.606201
0.974869	0.897754
0.801531	0.983245	0.709849
0.995347	0.894931	0.542186
1.30713	0.924937	0.738403
0.999378	0.798786	0.930702
1.05631	0.991178	0.54623
1.22735	0.806075
0.954787		0.584922
1.14421	0.856604	0.643669
0.980124	0.923844	0.735057
0.989801	0.847822
0.834586	0.891625	0.667972
0.937375		0.648083
0.890936	0.905178
0.986568	0.754416	0.825983
1.02436	0.902548	0.737793
0.961744	0.680573	0.667239
1.0327	0.712913	0.905654
0.799851	1.07015	0.76122
	0.958177
0.950146	0.977998	0.684083
1.09245	0.80605	0.662718
0.828536	0.925633	0.625102
0.975022	0.686262	0.686598
1.05528	0.840416	0.584121
0.740079	0.704686	0.694301
	0.773657	0.724629
0.821444		0.673773
0.91019	0.761365	0.783291
1.07681	0.845264	0.669893
0.653948	0.776739	0.772645
1.28086	0.765334
0.852076	0.758683	0.695783
0.842355	0.733955	0.650983
		0.695569
	0.817566	0.68858
0.938698	0.681779
0.656884		0.845631
1.00821	0.771618	0.791275
0.650195	0.917791	0.799929
0.912969	0.738165	0.754027
0.864516	0.955254	0.624005
0.923198	0.999336	0.61141
0.828053	0.77515	0.603906
0.852913	0.771606	0.692306
0.656366	0.920818	0.616682
1.07212	0.834854	0.610602
0.710748	0.66609	0.630978
0.866461	0.842733	0.724599
1.00358	0.918371	0.579684
0.692664	0.935397	0.691786
1.01	0.864842	0.614755
0.996294		0.73328
1.24514		0.782419
0.767199	0.824416	0.627783
1.02814
0.840636		0.817212
0.787226	1.00332	0.561745
1.13054	1.0982	0.667904
1.1069	0.867528	0.567267
0.973811	0.890595	0.564693
0.840033	0.934485	0.578645
0.831671	0.967734	0.782937
0.993592	0.7938	0.75801
0.947367	0.683612	0.619829
1.04542
0.797149	0.843613	0.854794
0.826201	0.996079	0.665047
1.02837	1.13922
0.789693	0.784537	0.723313
		0.691791
0.745924	0.965698	0.797322
0.684584	0.886165	0.746926
0.861338	0.86404	0.748742
0.657292	0.991906	0.735769
0.894093	0.710303
0.899514		0.785451
0.744752	0.743332	0.857351
0.970963	0.697547	0.817085
0.841978	0.752142	0.719702
0.817198	0.909284	0.702212
0.898985	0.808277	0.75608
0.777001	0.980642	0.754811
0.815527	0.760527
0.924429	1.02308	0.87171
	0.933625	0.652936
0.762472	0.941172	0.691938
1.12692	0.832401	0.636278
0.664268	0.827922	0.940516
0.997015	0.833722	0.558232
0.90085	1.05151	0.587618
0.936508	0.971768	0.647343
0.990348	0.920347	0.650239
1.02293	0.874236	0.775315
0.787086	0.729093	0.739509
	0.932097	0.656185
0.862151		0.646375
0.687493	0.805058
0.85384	0.9424	0.64913
0.806485	0.844243	0.915426
0.649028	0.772157	0.804182
1.01509		0.687652
0.972191		0.765441
0.696601	0.890542
0.742581	0.734363	0.672388
	0.990099	0.544402
0.643904	0.799777	0.619164
0.868985	0.854358
0.907976	0.754846	0.875485
0.862391		0.741888
0.830452	0.825372	0.801279
	0.92413	0.621173
1.11582	1.13265	0.659889
1.01584		0.614431
0.652062	0.869203	0.69117
1.07358	0.823626	0.795271
0.853367	0.747001	0.654616
0.870613	0.732332	0.763981
1.03859	1.04141	0.661789
0.80878	0.802309	0.694667
0.99435	0.773343	0.946334
0.685034	1.06917	0.677987
0.77763	0.80205	0.721275
0.64768	0.78177	0.648321
1.01633	0.886734	0.652021
0.909422	0.783004	0.592863
0.707461	0.98812	0.585905
	0.86657
0.705198		0.719265
0.996357	0.86888
	0.698125	0.659764
1.1554	0.925474	0.608957
0.909786	0.906237	0.601531
1.14294	0.822958
0.868657		0.75518
0.903438	0.941004	0.66577
0.836495	0.787663	0.634733
0.927381	1.00671	0.704153
0.694304	0.948025	0.604474
0.909889	0.803404	0.758987
0.78745	0.882141	0.931567
0.990571	0.794414	0.775847
0.770881		0.668501
	0.812646	0.782608
0.964903	1.0351	0.743821
	1.05033	0.617374
0.912185	0.98388	0.88472
1.1548	0.722476	0.782794
	0.813612	0.683985
0.911788		0.54602
	0.772242	0.642327
0.819181	1.05396	0.734872
1.15612	0.870711	0.686942
0.765886	1.1142	0.772193
0.775801	0.928826
0.832415	0.77372	0.705857
0.694876	0.980555	0.736681
0.786618	0.841801	0.691098
0.912466	0.849386	0.593821
	0.815851	0.682954
0.989877	0.830773
	0.927226	0.835384
1.29874	0.90112	0.707595
0.854873	0.841365	0.742496
0.797644	1.01434	0.656651
0.82048	1.0054	0.633487
0.909404	0.973468
	1.04913	0.736265
0.714591	1.14926
0.878425	0.812549	0.84804
0.649041	0.760181	0.757572
0.685608	0.809447	0.721077
0.916084	0.782768	0.59701
	0.791213	0.659709
0.842503	0.946272	0.752342
0.981607	0.842761	0.758863
	0.871428	0.973433
0.887966	0.964458	0.655891
	0.996892
0.814303	0.794125	0.746964
0.80722	0.821883	0.664993
0.779023	0.869765	0.796711
0.83612	0.753303	0.622433
1.06931	0.781938	0.575958
1.17793	0.83402	0.807957
0.724374	0.915924	0.76869
0.857006	0.672538	0.738017
1.01998	0.968948	0.683455
0.756267	0.832723	0.853
0.944992	0.753261	0.761675
0.790267	0.801286	0.798037
0.854118	0.736871	0.68238
0.867208	1.04312	0.660883
		0.652828
0.723329	0.699656	0.718196
	0.948308	0.603922
0.794433	0.842473	0.722098
0.789797	0.863879	0.722278
0.893018	1.02	0.785096
0.899664	0.765099	0.739472
0.874252	0.845208	0.74952
0.65575	0.69486	0.663323
1.05838	0.772795	0.729567
0.735978	1.12889	0.685082
1.03111	1.08165	0.717979
1.07171	0.893697	0.707454
	0.937316	0.662407
1.03442	0.832369	0.627974
0.872991		0.67013
1.1173	0.943158	0.752385
0.79972	0.81915	0.608205
0.762885	0.829486	0.783506
0.82477	1.08552	0.62618
0.751841	0.780261	0.703041
0.862186	0.848316	0.547664
0.800847	0.96384	0.701902
0.96187	0.794662	0.6912
0.865835	0.85326	0.754501
0.978666
0.790954	0.806257	0.760079
1.04296		0.644591
1.15046	0.849867	0.682343
1.08872	0.817192	0.794374
0.904155	0.927697	0.803871
0.911026		0.692358
0.84887	0.849007	0.789354
0.905262	0.777976	0.748439
0.941754	1.1044	0.667006
0.982964	0.878857	0.763532
1.06752	0.681199
0.838444	0.938683	0.710106
0.880717	0.895955	0.706059
0.84797	0.818986	0.652522
0.786473	0.920872	0.754361
0.96622	0.768553
0.767725	1.00151	0.710493
0.977854	0.879346	0.694378
0.846318	0.903923	0.765663
1.08641	0.861413
	0.792441	0.684166
0.951495	0.759108
0.9775	0.693569	0.650329
0.764728	0.743741
0.87039	0.958576	0.78807
	0.764202	0.69509
1.31635	1.00358	0.780377
0.985772	0.770904	0.774694
0.968848	0.891594	0.786256
0.751871	1.01884	0.647331
0.799658	1.06883	0.607128
0.894541	0.831614	0.678427
1.03674	0.746324	0.706314
	0.848878	0.710202
0.976093		0.687577
0.86763	0.970027	0.752182
0.993867	1.13331	0.55559
	1.04975	0.72196
0.968092	0.814849	0.725823
0.904938		0.698856
0.951782		0.631001
0.810621	0.754941	0.849368
0.9742	0.750565	0.718528
0.671891	0.910956	0.612878
0.880655		0.781625
0.95746	0.856382	0.586402
1.02558	0.715327	0.789333
0.85527	0.63333	0.67118
	0.876192	0.721835
0.730075	0.937889	0.715766
0.893719	0.786691	0.646609
0.980012	0.810878	0.737653
1.00234	0.94185	0.762588
0.881668	0.892254	0.605816
0.753738	0.81509	0.546899
0.872096	0.95816	0.619836
		0.65647
1.04444		0.701778
0.867445	0.908338	0.608347
0.939034
1.26915	0.863496	0.752179
0.760253	0.768309	0.670645
0.882712	0.852507
1.01432		0.676188
0.877977	0.911537
1.0147	0.802044	0.714587
1.04728	0.658743	0.746363
0.890078	0.813453	0.671853
1.08129		0.977236
0.960469	0.978991	0.755327
0.865377	0.833984	0.640016
0.817939		0.798133
1.1794	0.78145	0.561779
0.824817		0.673265
0.854459	0.677477	0.788401
0.970522		0.637408
	0.702511	0.70774
1.0819	0.759212	0.768442
0.765227		0.55502
0.92083		0.722742
0.923313	0.702984	0.706786
0.881103
	0.79677	0.776493
1.01114	0.713972	0.635145
	0.681481
0.857842	1.07056	0.649495
0.867647	1.00777	0.712742
0.964908	0.914152	0.905223
1.05789	0.885327	0.862577
0.837901	0.968813	0.693214
0.890141	0.764219	0.698002
1.04979	0.727055	0.627074
0.861398	0.921691	0.74137
0.986975	0.833267	0.550698
0.847071	1.05744	0.645653
0.945178	1.03741	0.598714
0.925545	0.721696	0.636237
0.920894	0.859679	0.678496
0.907146	0.946488	0.743636
0.917936	0.764821	0.691615
0.987793	0.932106	0.699919
0.933805	0.956726
0.878019	0.690765	0.740428
0.909707	0.822748	0.642007
1.08125	0.690748	0.652786
1.10708	0.821158	0.768757
	0.731604	0.73815
1.00205	0.695898	0.629767
0.883941		0.802991
0.788354	0.752845	0.608691
1.04445	0.762294	0.68325
0.944892	0.829221	0.653215
1.10059	0.907249	0.756449
1.04817	0.873787	0.709068
0.996931	0.781881	0.746629
1.0444	0.863168	0.658632
1.09283	0.773586
0.781682		0.544299
1.11181	0.805164	0.714771
0.948617	0.858113
0.819808	1.11362	0.755957
1.0408	0.976089	0.744112
0.991719	0.806481	0.661216
0.757819	0.819816	0.675008
1.04294	0.655946	0.708578
0.796624	1.12808	0.543195
1.23033	0.795481	0.643317
0.933055	0.838847
	0.827999	0.809797
1.04922		0.671467
0.837203	0.811159	0.676931
0.747401	0.67611	0.826619
0.754603		0.572092
0.820663	0.885249	0.683849
0.904755	0.904269	0.608932
0.986027	0.85491	0.68446
0.922239		0.571463
0.876166	0.763469	0.650221
0.903626	0.803873	0.800499
0.931183	0.947729	0.760044
0.961564	0.719291	0.62418
0.933809	0.833691	0.647033
1.01866	1.07044	0.688227
1.18355	0.767462	0.622188
1.06048	0.668693	0.7046
0.872689	0.704853	0.935418
0.891793	1.02804	0.813482
0.906952		0.739705
1.20211	0.807536	0.698046
0.850157	0.796615	0.696643
		0.731769
0.980548	0.8671	0.82546
0.908256	1.12715	0.641043
0.712109	0.806191	0.653965
0.839175		0.657228
0.8492	0.705756	0.671413
	1.08171	0.755102
1.02542		0.693477
1.13009	0.815697	0.590585
		0.732735
0.734429	0.870538	0.773365
0.964253	0.828875
0.89752	0.849576	0.627429
	1.02723	0.725475
0.969188	0.876699	0.682975
0.929791	1.11003	0.849622
0.951144	0.772591	0.82355
1.07905	0.708938
0.844233	0.869662	0.750746
0.726266	0.86926
0.807068	0.781957	0.713466
1.28045	0.637976
0.911171	0.931956	0.547573
0.777607	1.02719	0.676302
0.71426	0.86982	0.64821
0.88281	0.934461	0.906779
0.698354	0.964679	0.629093
0.911447	1.20124	0.838213
0.841491	1.06834	0.577473
0.844667	0.935359	0.623583
	1.00189	0.72573
1.02209	0.873674	0.731792
1.01105	0.762311	0.971219
	1.03004	0.643893
0.868959	0.968351	0.625817
0.982644	0.991724	0.679808
0.866153	1.00183	0.748501
1.04375	0.932202	0.672519
	0.950643
0.855442	0.674469	0.863831
	0.747178	0.611384
0.763033	0.763099
0.775617	0.880663
	0.787852	0.654293
0.935503	0.852968	0.581542
0.887568	0.829158	0.674092
	0.723924
0.871884	0.712923
0.956632	0.881503
0.712094	0.788514	0.778767
1.00073	0.803387
0.929222	1.04317	0.628414
0.899733	0.727635	0.682629
0.900367	0.905916
0.986999	0.804141	0.660385
0.797289	0.761143	0.627762
	0.854993	0.564009
0.76145	0.789166
0.851426	0.878318
0.873303	1.00789	0.670283
0.805242	0.947246	0.870874
0.792289	0.695517	0.768451
0.947306	0.830978
0.901422	0.762066	0.717743
0.907925	0.931368	0.628617
0.814015	0.736488	0.72895
0.727506	0.881539
0.807227	0.914046	0.64727
0.776954	0.892133	0.653972
0.80955		0.559225
0.758801	0.738894	0.641677
1.14139	1.03914
0.857545	0.692628
0.788041	0.806565
0.868024	0.999163	0.927372
0.852849	0.695016	0.71285
0.759126	0.70552	0.79383
	0.918557	0.880559
0.882022	1.08313	0.741231
0.871764	0.804955	0.598448
0.713406	0.929442	0.762902
0.957375	0.975416	0.862128
0.828897	0.936082	0.675911
1.20472	1.0368	0.766174
0.832655	0.899312	0.741455
1.14124	1.02749
	0.929075
0.819053	0.770771	0.817231
0.798019	0.830296	0.95565
0.901214	0.843696	0.797398
0.825853	0.892357	0.681522
0.80439	0.747445	0.734776
0.823321	0.727159	0.566661
0.912111	0.750743	0.879959
0.852326	0.978773	0.654501
0.863043	0.91546	0.672362
0.67918	0.777398	0.746327
0.830914	0.870997
0.93333	0.860777
	0.987651	0.716479
0.848899		0.755598
0.724246	0.894898
0.754042	1.04595	0.664651
0.855939	0.697637	0.615544
0.767483	0.827936	0.758872
	0.893442	0.879497
0.891576	0.892377	0.754844
1.05505	0.750227	0.912629
0.945095	0.856142	0.834221
0.971844	0.810405	0.822371
1.04588	0.943842	0.743934
0.740591	1.06108	0.813345
0.844815	1.05266	0.65258
1.07857	0.998776	0.867994
0.841755	0.784157	0.596142
0.901874	0.773475	0.973289
	0.861717	0.770187
0.694681	0.945559	0.87082
0.74674	1.04377	0.671051
0.726435	0.840857	0.657507
1.06473	0.662209	0.698865
1.13232		0.61355
	0.926527	0.698993
0.907835	0.832276	0.722495
0.991526	0.992726
0.861644	0.914001	0.658491
	0.935893	0.6773
	0.829682	0.532889
	0.81033	0.7497
0.86999	0.836904	0.669108
0.761445	0.745854
0.868367	0.822117	1.04936
0.992969	0.947883	0.824454
0.892256	0.929971	0.819385
0.963591	0.837127	0.834832
0.813513	0.885122	0.888751
0.873416	0.836999	0.873506
	0.77886	0.816851
0.958432	0.715328	0.901456
0.849239	0.792849	0.578385
0.986597	0.999313	0.53864
0.785633	0.848156	0.580657
	1.0446	0.654242
0.747445	0.713711	0.788932
0.738106	0.725596	0.673254
0.770108	0.851912	0.712552
0.757971	1.01976	0.782925
0.943045	0.915111	0.64861
0.897471	0.766167	0.614156
0.764365	0.927216	0.724658
1.00466	0.858054	0.937929
0.894839	0.759507	0.667022
0.74996	0.857056	0.75826
0.928508	0.68487	0.563213
0.875155	0.829398	0.580051
	0.733	0.664199
0.769446	1.0407	0.675233
0.90051	0.978404	0.81254
0.820828	0.8507	0.74115
0.964979	0.987901	0.851532
0.849717	1.03728	0.57772
1.13562	0.823551	0.862494
1.13771	0.654558
0.720335		0.795315
0.979277	0.896467	0.705392
1.07637	0.83192	0.790194
1.14464	0.94203	0.633032
1.1525	0.845304	0.801246
0.858292	1.01657	0.704345
0.88113	0.847821	0.65113
1.04861	0.789163
0.824198	0.997994	0.769515
0.883691	0.735424	0.888058
0.753499	0.7598	0.580565
0.816163	1.04359	0.860772
0.761256	0.824173	0.895959
0.832349	0.893122	0.754653
1.12403	0.818881	0.763858
0.818472	0.92404	0.688467
1.02465	1.02467	0.602854
0.752282		0.609857
0.946863	0.810627	0.610857
0.868386	0.8444	0.647459
0.87439	1.01684
0.935541	0.921768	0.971736
1.2289	0.85765	0.648827
0.842915	0.803129	0.826949
0.754319	0.868206
1.02003	0.877799	0.602704
1.08614	0.828292
0.978282	0.790784	0.872768
1.20803	0.869929	0.671152
0.714418	0.905909
0.772476	0.812559	0.636863
0.982331	0.903074	0.681871
	0.8769	0.801701
1.05841	1.01409	0.556296
0.796713	0.818332	0.607846
1.14922	1.07353	0.920416
0.846051	0.900335	0.555674
0.876381		1.05616
	0.823814	0.721763
0.87665		0.69997
0.850541	0.810203	0.71875
0.804966	0.977184	0.80716
0.736219	0.918528	0.708242
0.715203	0.934808	0.769976
1.01066	0.94811	0.792428
0.735216	1.04547	0.817118
	1.16545	0.689484
1.16722		0.578021
0.954248
0.990172	0.953032	0.707295
	0.77242	0.716774
	1.00361	0.64809
0.879306	0.682032	0.666645
0.907588	1.14025	0.700146
0.952255	0.85267	0.894514
0.869474		0.779459
1.12146		0.793529
1.00601		0.787151
1.20724	0.964917	0.717832
	0.975459	0.623834
0.939087		0.612784
1.05324	0.703221
0.861578	0.759991	1.05783
0.823237	0.958411	0.947196
1.0645	1.06061
0.938483	0.982553	0.755919
0.907139	0.896885	0.817901
0.713689	0.969942	0.700894
0.893546	0.908705	0.796106
0.899918	1.03558	0.69513
	0.718866	0.678027
0.915648	1.00585	1.03236
1.10455	0.757046	0.850785
0.789193	1.13344	0.699419
0.909087	0.791021	0.73301
1.04073	1.08522	0.672073
1.13086	0.859708	0.609669
0.850373	0.993326
0.917509	1.17321	0.777595
0.853278	0.945714	0.569022
0.976174	0.978144	0.727501
0.876239	0.935844	0.688739
0.988844	0.845684	0.887936
0.76231	0.903161	0.726197
0.820736	0.788826	0.96743
0.895606	1.02876	0.712713
0.809415	0.832406	0.791585
0.875541	0.970376	0.930132
0.846066	0.867626	0.614655
	0.855267	0.667371
0.967782	0.879703	0.675376
0.978652	1.0103
0.909723	0.985782
0.770177	1.05881
0.939384		0.795072
0.983845	1.05421	0.798148
1.07428	0.963189	0.842393
0.912908	0.977528	0.62481
0.854528	0.739954	0.674113
1.04971	0.972795	0.817258
	0.935037	0.740556
0.96374	0.837426	0.690981
		0.81161
0.911858	0.944629	0.761845
0.831141	1.14118	0.772677
1.01208	0.88859	0.727069
0.893243	0.985838	0.778666
0.823022	0.785065	0.767033
0.811117	0.929674	1.04576
0.808515	0.967197	0.873042
0.982485	0.912818
0.955651	0.982986	0.665356
0.752244	1.01456	0.594642
0.90731		0.745289
0.783178	1.13354	0.826231
1.04796	0.837239
0.912202	0.939389
0.959572	0.906224	0.841479
0.852013	0.749808	0.647283
0.814142	0.92243	0.654068
1.07641	0.821499	0.780948
0.902437	1.06552	0.836398
0.968895	1.01207	0.742097
0.866018	0.916858	0.707414
0.87725	0.891987	0.740311
	0.744831	0.546455
1.00874	0.868475	0.699721
0.914859	0.734731
0.860423	0.930701	0.715811
0.715007	1.00796	0.944026
0.828794	0.850822	0.768296
	0.797803	0.538229
0.938644	0.867275	0.671615
0.807155	1.10087	0.719049
0.950968	0.760904	0.648738
0.951681	1.03996	0.629755
0.71412	1.00406	0.595668
0.898677	0.796731	0.627854
0.828713	0.808045
0.785378	0.889083
0.926921	0.915857	0.682027
	0.718511	0.752891
		0.627034
	0.968697	0.849705
0.911767	0.958276	0.839073
0.963017		0.560333
1.02444	0.865569	0.917678
0.870339	1.04927
0.987735	1.10894	0.761375
1.07566		0.780418
0.965167		0.714686
1.09197	0.942454
0.823576	0.856966	0.755658
1.00931	0.873909	0.782437
0.922	0.793614
0.882609	0.790425
0.878208	1.05183	0.839278
0.816823	0.812712	0.627639
0.946173	0.68422	0.633124
1.00176		0.934843
1.01944	0.79541	0.73079
0.903777	0.806675	0.808519
0.899782	0.703964	0.665784
	0.832451	0.75955
0.779041	0.769125	0.620075
0.849478		0.713189
1.1026	0.664113	0.756139
1.02407	1.21383	0.73113
1.17582	1.2029	0.717806
	0.79771
0.782242	0.770467	0.840988
0.954161	0.833423	0.922136
0.994344	0.833794	0.762509
	0.935923	0.599727
0.818086	0.860513	0.901521
	0.690747	0.727786
0.73212	0.742031	0.813862
0.990931	0.894733	0.676309
	0.728691	0.736367
	0.733124	0.860135
1.00215	0.832649
1.12565	0.829215	0.740183
1.07829	0.85789	0.661506
0.97697	0.807775	0.72523
0.866213	0.73259	0.704839
0.806208	0.852178	0.764056
0.869057	1.10158
0.891311	0.933065	0.815222
		0.824298
0.825878	0.865907
0.857171	0.858535	0.529929
1.05488	1.15266	0.744898
	0.910884	0.664003
0.96893	0.940869
0.893999	0.920151	0.904715
0.724458	1.01918	0.786011
	0.958139	0.684013
1.03707	0.68214	0.741821
0.737503	0.959544	0.610944
0.762798	0.899063	0.790141
0.816042	0.982652	0.811868
	0.85048	0.714637
0.935768	0.853409	0.67513
	1.0073	0.658783
1.11243	0.867826	0.698659
0.965243	0.790976	0.650329
1.03477	0.956777	0.772556
1.17375	1.17051	0.717024
1.14236	0.862303	0.827101
0.731748	0.882756	0.742598
0.776112	0.866133	0.827404
0.95471	0.920162	0.654081
0.949991	0.673782	0.681349
1.19656	1.15228	0.875402
0.746326	1.08454	0.702925
0.975515	0.718938	0.654824
0.995936	0.903601	0.84914
0.959259	0.899769	0.765558
0.82715	0.756572
0.959489	0.913299	0.985366
0.956559	1.06462	0.731914
0.808251	0.726542	0.756036
1.15355	0.864578	0.65533
0.929257	0.721809	0.648407
0.723182	0.757964	0.703933
0.840635	1.03486	0.680788
0.837282	0.981526	0.56501
0.981	1.05876	0.773371
0.919373	0.809186	0.728941
0.835145	0.79034	0.776404
0.82706	0.850641	0.829617
1.04605	0.905958	0.788482
0.844789	0.900381	0.655499
0.926671	0.817324	0.652736
0.848462		0.725178
0.749252	0.690744
1.04279	0.705964	0.620465
0.803911	0.700921	0.74003
	0.989979	0.78741
1.17299	0.856467	0.816687
0.756295	0.949541	0.637984
0.883004	0.726643	0.774756
0.873839	1.17403	0.702945
0.968459	0.711349
0.785337		0.697429
	0.816358	0.706209
0.787174	0.874468
0.769593	0.834165	0.807885
0.892624	0.825729	0.851599
0.837175		0.687546
0.939781	0.92727	0.831963
	0.902876	0.73626
0.908468	0.80543	0.656318
0.88378	0.852323
0.815235	0.846788	0.6783
0.86154	0.942465	0.8033
1.0443	1.00255	0.613091
0.881961	0.764161	0.558051
	0.934447	0.766754
1.03761		0.873952
0.838629	0.817793	0.80177
0.911422	0.87057	0.813398
1.03498	0.672268	0.578236
0.846654	0.873988	0.750306
	0.761611	0.753324
0.999633	0.883186	0.868901
0.959088	0.729134	0.736699
0.860753	0.757218	0.777545
0.852996	0.878605	0.97115
0.811297		0.64959
1.15883	0.716878	0.71156
1.0143		0.694848
		0.667125
0.855874	0.859923	0.820255
0.859312	0.837315	0.685652
1.05959	0.790738	0.701409
0.777868	0.775415	0.656863
	0.87325	0.922796
1.01344	0.938215	0.69241
0.833425	0.853592	0.872933
0.875814		0.752502
0.951351	1.07523	0.765573
0.941375	0.764783	0.672115
0.839186	0.758387	0.953902
	0.766748	0.595585
0.99372	0.78304	0.62453
0.904676
1.16237	0.835968	0.658258
0.976038	0.752465	0.845653
1.03803	0.906716	0.671606
		0.656939
0.994268	1.07568
0.906494	0.780638	0.745212
1.18802	0.658284	0.587176
0.942734
		0.803307
0.743729	0.918078	0.759982
0.713392	0.847216	0.596287
1.0706		0.571544
0.89603	0.783586	0.756266
0.867772	0.889766
0.824464	0.972291	0.842614
0.8333		0.709869
1.03319	1.20811	0.591008
0.81863	0.726286	0.541825
0.813631
1.07245	0.947421	0.728522
1.05683	0.807846
0.724318	0.81849	0.952786
1.08935	0.849659	0.67626
0.824809	0.809969	0.901745
1.08679	0.908748
1.06718		1.01167
0.979676	0.782404	0.98595
0.924539	1.10443
	0.87387	1.06802
0.821402	0.941559
1.00422	1.02211
0.858132		0.94661
0.981536	0.776773	0.982436
1.01766	0.964478	0.809441
0.981439	0.813753	1.03766
1.09344	0.828939
0.913246	0.904512	0.882088
1.2289		1.04623
0.828436	0.85667	1.10182
0.941713	0.859295
0.884696	0.843135	0.75378
0.952024	0.910774	1.08926
0.78667
0.858046	0.835533	0.596385
0.985522	1.01015	0.952545
0.829052
1.0012	0.808371	0.827298
0.905315
0.910684	1.16262	0.596928
0.904956	0.786296
	1.01517
0.885375	0.827532	1.08247
0.974785	0.822304	0.579241
1.0271	1.04045
		0.675783
0.711701	0.991312	0.677871
0.795552	1.03976	0.778785
		0.895239
1.08826		0.575904
0.89461	0.980502	0.718731
1.04317	0.780978	0.830645
1.001	0.698328	0.676042
0.846385		0.649573
0.83214	0.813828	0.75982
0.893068	0.891026	0.789791
0.935152	0.759477	0.625583
0.963411	0.876566	0.788795
0.85795	0.967198	0.718851
0.949504	1.16138	0.80046
0.893036	0.89183	0.692091
0.820771	0.985583	0.732072
0.810142	0.950518	0.637602
0.753477	0.708396	0.729907
0.834956		0.810737
1.164	0.856303	0.649277
0.851967	1.15707	0.781423
0.942238
	1.04119	0.69758
0.885097	0.866186	0.745673
0.921621
0.932159	0.913768	0.739224
0.911211	0.858492	0.740716
	0.825562	0.581537
0.946033	0.831054	0.557167
1.01212	0.915686	0.746539
0.943302	0.947852	0.84523
0.939905	0.874403	0.874823
1.06648	0.978273	0.657249
1.11818	0.79479	0.813393
0.977857	0.942863
0.872993	0.723065	0.709501
1.14357		0.597199
0.934429	0.949944	0.576926
0.892841	0.884501	0.733719
0.873116	0.673694	0.63505
0.831417	0.761155	0.938079
0.881496	0.871864	0.798123
0.718906	0.970835	0.739636
0.84518	1.20344	0.654317
1.02917		0.762111
0.701748	0.94585	0.697809
0.928931	0.854263	0.971255
0.879979	0.903528	0.594691
0.808992	0.813854
1.00723	0.865704
0.887856	0.75544	0.556256
0.946413	0.935823	1.0967
0.886849	0.865027	0.706505
0.958858	0.726269	0.717409
1.00608	1.07369
0.757596	0.932402	0.69825
0.912523	0.880969
0.889849	0.897916	0.738549
0.98927	1.05639	0.741359
0.73653	0.913705	0.704898
0.890395	1.04216	0.749804
1.08596	0.951869	0.583588
0.93131	0.928356	0.832399
0.938533	1.01451	0.853815
0.798026	0.714761	0.681894
0.901245	0.855689
	0.876902	0.794797
1.00575	0.974216	0.703796
0.772302	1.02444	0.654291
0.715731
0.803014	0.977995	0.601336
0.888769	1.01018	0.728135
0.861664	0.793651	0.81947
0.892432	0.800025	0.830178
0.825111	1.00383	0.823529
0.852541	1.06919	0.634419
1.06858	0.773453	0.63551
1.00046	0.965548	0.687165
0.784488	0.945638	0.929147
0.900901	0.998023	0.982738
0.845152	0.772843	0.713599
		0.762088
0.883382	0.702259
0.905305	0.911445	0.766552
0.699173	1.1105	0.819637
0.959962	1.04591	0.664082
0.823101	1.0207	0.972978
1.00142	0.804026	0.779378
0.948884	0.964344	0.865906
1.09101	1.09068
1.0002	0.977157	0.852325
0.860028	0.767877	0.782919
1.00996	0.907593	0.727208
	0.916107	0.898187
0.92456	0.741873	0.621317
0.840095	0.909786	0.635647
1.06688	0.80001	0.762656
0.93967	0.840394	0.621174
	1.06745	0.758122
0.982032		0.87112
0.988205	0.822883	0.593709
0.965073	0.829816	0.698962
0.901173	0.885799	0.792026
1.13185	0.830647
0.8947		0.709984
0.759069	0.995026	0.766913
0.907702	0.934931	0.723471
0.899319	0.890781
0.789275	0.781743	0.722161
	1.07282	0.561174
0.827255		0.71002
0.836247		0.745954
0.803667		0.971567
1.10187		0.705329
1.06404		0.632595
0.968426	0.77315	0.758972
1.01543	0.87724
0.950222	0.725461	0.65875
0.891852	0.751654	0.71023
0.876987		0.792854
0.970914	0.915303	0.808489
0.905342	0.88137	0.820343
0.890436		0.660703
0.939389	0.969059	0.667541
0.754395		0.62606
0.767454	0.931686	0.774423
	0.981188	0.648324
0.959786	0.7761	0.706298
1.10075	1.17849	0.840537
1.01248		0.683088
1.04324	0.94098	0.756296
0.902267	0.988875	0.735909
0.832325	0.947516	0.891549
0.85016	0.849364	0.784342
1.1189	0.928694	0.898584
0.850622	0.880329	0.693757
0.938847	0.996937	0.880056
0.791125		0.754695
0.861702	0.934346	0.594682
0.791309
1.00624		0.839745
0.837644		0.736499
0.924371	0.679609	0.826381
0.994572		0.777008
	0.915978	0.798204
0.745554	1.02367	0.572206
0.843807	0.792665	0.801947
0.937144	0.6937
0.857437	0.890875
	0.760561	0.662825
0.728107		0.603533
1.05398	1.11761	0.697332
0.940862	1.08897	0.889902
0.987495	1.13115	0.691521
0.953897		0.618537
0.950948	0.709921	0.637276
	0.874949	0.736275
0.861994	1.02423	0.67272
0.869767	0.688902	0.671537
0.810084	0.918562	0.814334
0.907071	0.996941	0.960083
0.93416	0.993477	0.785839
1.22463		0.595165
1.17122	0.663767
	0.912347	0.628422
0.88919	0.736606	0.697851
	0.941121	0.640037
0.837995	0.998356	0.796264
0.952737	0.837126	0.650814
	0.807058	0.755948
0.789125	1.04861	0.589174
0.860122	0.877646	0.691473
0.891129
0.882323	0.989599	0.593402
0.888112	0.923677	0.843562
0.77073		0.797919
0.808834		0.852068
0.971405	0.846791	0.840617
0.875564	1.09807	0.723609
0.771292	0.931194	0.711626
1.08903		0.694726
0.921921	0.734466	0.662354
0.905346	0.875772	0.727999
0.837933	0.812807
0.902143	1.00539	0.806852
0.854411	1.04552	0.680169
0.991022	0.939229
0.88135	0.944354
0.823653
1.08753		0.780978
0.937889	0.983842	0.788701
0.841012	1.01899	0.697526
0.780573	0.777173	0.658492
0.909364	1.02891
0.83867	0.825461	0.745612
0.974426	0.927787	0.645652
1.04302	0.869925	0.990344
1.06893	1.06555	0.76778
0.8799	0.680264	0.554023
0.958584	1.11511	0.628329
0.717221	0.739624	0.621362
1.01707	0.798661
0.900732	0.848084	0.934073
0.943229	1.02016	0.771888
1.18749	0.927862	0.679729
0.777989	0.878643
0.875971	0.951862	0.73288
0.930436	0.750493	0.659875
0.948228	0.984896	0.641558
0.957625	0.879521	0.757748
0.929391	0.746278	0.800294
1.1816	0.983005	0.637644
0.818073		0.729961
1.1129	1.13888	0.682341
0.852684		0.772476
0.956423	0.88055	0.644254
1.10432	0.959429	0.689295
0.805363	0.887358	0.800395
0.903562	1.05409	0.698705
0.940066	0.855953
0.807681	0.737019	0.85785
	0.736732	0.675435
0.758946	0.867343	0.861295
0.972265	0.787182	0.942409
	0.991838	0.707587
0.962448	0.996967	0.647038
	1.00016	0.553741
1.08207	0.926631	0.733336
0.797591	0.857014	0.764115
0.906307	0.67398	0.750662
0.785608	0.906939	0.629221
0.946888	0.904394	0.700926
0.920902	0.815964	0.67512
0.93797	0.895179	0.692547
0.776917	0.716321	0.74349
1.23773
0.921142	0.806033	0.676876
0.948541	1.00972	0.728798
0.824573	0.858586	0.727626
1.0259	1.05331	0.708902
0.955731	0.953331	0.76409
	0.834073	0.855982
	0.935453	0.757999
0.928172	0.981911	0.543597
0.830101		0.718632
1.01067	0.816499	0.716471
0.772433	1.02504	0.754327
1.01427	0.88206
0.964383	0.889346	0.692337
1.04918	0.762833	0.63368
		0.764034
0.943328	0.774477	0.562138
	0.96994	0.763805
0.950867	0.826626	0.831257
0.871554	0.742404	0.616584
1.01711	0.735622	0.692056
0.977577	0.954331
0.816912	1.00351	0.658509
0.986015	0.855309	0.747001
0.932242	0.868683	0.650275
0.97624	0.749553	0.672746
0.91549
0.964188	0.808195	0.619708
0.902129	1.12249	0.684665
0.991864	0.88477	0.766556
0.829305	0.925915	0.762407
0.880395	1.03211	0.774474
0.830014		0.860339
1.04184	0.991241	0.567033
0.859563	1.04419	0.746069
1.00005	0.955025	0.740892
1.11768	0.874339	0.911013
0.944154
0.821175	0.967399	0.752836
	1.03883
0.898098	0.925946	0.618472
0.896514	0.979625	0.624785
1.05939	0.98362	0.770207
0.820687	1.05186	0.785213
0.926262	0.985307	0.596953
1.04993	0.947394	0.833741
0.743769	0.820254	0.686735
0.886125	0.977466
0.885771	0.838846	0.60032
0.896371	1.02688	0.666289
0.971346	0.891354	0.7322
0.860966	0.991693	0.690703
1.00249	0.856019	0.740211
0.943604	0.833709	0.713617
0.797737	0.828934	0.659284
0.941181	0.798751
1.04154	0.809056	0.87776
1.0449		0.875709
0.85003		0.648866
0.918982	0.884217	0.780815
0.864599	0.904963	0.889426
0.968859	0.987146
	0.88561	0.682725
1.00376	0.949728
0.850184	0.743168	0.65253
0.970254	1.04271
0.897217	1.05173	0.732376
1.0163	0.93472	0.758847
1.00735	1.0131	0.721277
0.982306	0.906163	0.705562
0.954503	0.79489
	0.985502	0.721177
	1.10487
1.02383	0.808113	0.781209
0.865147	0.828843	0.612818
0.909397	0.741461	0.708845
0.92634	1.13818	0.722969
1.02733		0.693898
0.916873	1.02201	0.679257
1.09067	1.00218	0.882506
0.907861	0.949608	0.744887
0.851842	1.23419	0.82177
1.16626		0.768554
0.91385	0.832553	0.72588
0.917461	0.845973	0.848326
0.93347	0.982481	0.734795
0.775434	0.823189	0.778779
0.9411	0.986441	0.862
0.893149	0.898885	0.904653
0.839554	0.72274	0.634602
0.912247	0.749358	0.882958
0.735363	1.24666	0.737726
0.914	0.796588	0.765131
1.04197	1.09984	0.621197
1.15147	1.0318
	0.953081	0.553706
0.749209		0.815426
1.13615	0.970488	0.883326
1.05735	0.908114	0.60642
1.03052	1.04705
	1.13365	0.74462
0.802682	1.09786	0.731274
1.0067	1.0888	0.714609
0.947821	1.15149
1.15888	1.02485	0.773296
0.862567	1.00756	0.844508
1.0037		0.674256
0.998098	0.91043	0.875013
	0.721106
0.901086	0.857148	0.829185
	0.99649	0.776929
0.692413	0.895973	0.666917
1.13631	0.983409	0.713573
0.898478	0.82994	0.73871
0.822517
1.03653	0.924793	0.672554
1.00811	1.08289	0.685044
0.865317	1.03274	0.925038
0.696912		0.710606
1.00815	0.96884	0.745298
0.846352		0.727448
0.87886	0.96339	1.01653
0.832459	0.974641	0.76914
1.07329	0.908271	0.688139
1.0212	0.670249	0.668733
1.02239	0.97778	0.718036
1.05959	1.01498	0.765383
1.00779	0.768461
1.01319
0.991778	0.770889	0.690673
0.966597
0.872581	0.926919	0.852273
		0.867335
0.984044	0.999372	0.736449
0.863833	1.01407	0.619631
0.834714	0.695482	0.708846
1.13056	0.911507	0.770624
0.868894		0.561939
1.02378	1.0194	0.948339
0.961833	1.00893	0.77587
0.859261	0.81813	0.700314
1.0347	0.93673	0.685667
1.03562	0.748939	0.863325
1.04922	1.07294	0.610508
1.08404	0.824293	0.706512
1.06665	0.90314	0.638802
0.958078	1.12525	0.703623
0.786875		0.5917
1.00197	0.835972	0.795727
1.03469	0.890953	0.74772
	0.991517	0.711535
	0.943687	0.712682
0.842896	1.10598
0.92894	0.893205	0.782337
0.885292	0.768149	0.747108
0.996608	1.03207	0.895824
	0.891305	0.646748
0.981504	0.919143
0.865356	1.06173	0.759844
1.00274	0.895289	0.544415
0.807687	0.887584	0.847203
0.906625	0.815293
1.09687		0.79702
0.843633		0.963497
0.756756	0.837035	0.787935
0.832008	0.901036	0.904637
1.00007	0.790898	0.570772
0.882742	0.926515	0.626277
0.92741	0.951194	0.660184
0.983953	0.803419
0.86592	0.939786	0.692666
0.82397		0.590971
1.10195	0.818421	0.727415
0.849365	0.926838	0.753998
0.878144	1.15734	0.810968
0.710097	1.04983	0.756811
0.913576
0.85515	0.867411	0.975498
1.04359	0.833896	0.679315
0.932974	0.918305	0.728293
1.06743	0.740331	0.686827
0.735067	0.824791	0.762851
1.06711	0.999784	0.845785
0.898325	1.07625
1.10984	1.02603	0.760265
0.924997	0.731515	0.900499
0.99522	0.766277	0.72088
1.07201	0.876259	0.625476
0.893398	0.841642
1.04945	0.84931	0.769164
0.764582	0.863727	0.852691
0.986169	0.930042	0.680558
0.764956	0.961463	0.571574
	1.16159	0.684705
	0.789133	0.730234
0.863368	0.933156	0.733845
1.01752	0.848899	0.709538
0.794982	0.858554	0.777828
0.989887	0.780835	0.627875
0.88955	1.05199	0.964816
0.771649	0.904594	0.739223
0.956906	0.953602	0.946765
0.868636	1.00666	0.712122
0.882041	0.723363	0.706448
0.863085	0.927266	0.743848
0.844724	1.13344	0.723336
0.804552	0.962395	0.675887
0.834172	1.01767	1.03021
1.11925	0.66494	0.590935
1.14955	0.865347	0.797662
1.11132	0.78173
0.949796	0.816302	0.742449
0.791843	0.879471	0.836464
0.771408	1.00881	0.640936
0.91543		0.761072
1.11895	0.71779	0.758126
1.12287	0.990768	0.757158
0.866546	1.00575	0.750855
0.908377	0.899871	0.634711
0.879449	0.887478	0.681619
1.03692	0.950511	0.5853
	0.933299	0.825444
0.742206	0.929005	0.553863
0.935475	0.775175	0.772906
0.722196	0.791041	0.730172
0.954052		0.751442
0.848402	0.667601	0.827151
0.999032	0.983099	0.751916
0.970497	0.845554	0.654524
0.809214	0.71218	0.711579
0.858615	0.908515	0.565507
0.867231	1.00128	0.746542
0.886308	0.801474
0.781016	0.789655	0.720931
0.90467	0.850732	0.771539
	0.929902	0.789865
	1.01143	0.75258
1.08752	0.895195	0.746873
0.814776	0.894094	0.819777
0.981977	0.735437	0.635843
0.723709	0.800119	0.615958
0.793679	1.14951	0.737151
0.856287	0.900324	0.683763
0.71098	0.893718
0.954236
0.893135	0.791649	0.876679
0.86317	0.770468	0.788609
0.980582	0.997807	0.793292
0.901966	1.01975	0.682852
1.10202	0.787692	0.785861
1.11637	0.875407	0.838098
	1.22153	0.693914
0.748376		0.609913
	0.824711	0.70994
1.03317	0.868862
1.01272	1.05661	0.80585
0.791715	0.870754	0.643821
0.726401	0.831752	0.693659
0.762673	1.12383	0.598551
0.794243	1.09329	0.777605
0.789837	0.876871
0.904515	0.999877	0.732235
0.901856	0.808963	0.724156
	0.939494	0.67064
0.948292	1.02942	0.670368
0.924984	0.731728	0.78593
0.781303	0.756467	0.712625
1.06384	0.945989	0.596026
0.866726	1.07068	0.742994
0.875529	0.971091	0.595136
0.836947	0.90195	0.791224
0.924526	1.09916
0.721699	0.932917	0.884804
1.02592	0.837056	0.700774
0.895722	0.931606	0.785207
0.96602	0.729565
0.885941	0.898382	0.663115
0.982778	0.85781	0.927887
0.818817	0.886839	0.693953
0.940294	0.768555	0.831919
1.00154	0.79611	0.728621
0.84501	1.15028
0.787385	0.828679	0.714301
0.946367	0.95633	0.845195
	1.01511	0.709567
0.84745	1.06941	0.673845
1.01999	1.06416	0.770102
0.702627	1.07353	0.742859
0.822635	0.920812	0.77618
0.884221	0.812388
1.01596	0.967401
0.92644	0.924406
0.915335	0.942186	0.875048
0.830134	1.00202	0.816497
1.00836	0.868472	0.67914
0.969238	0.892545	0.694677
1.05321	1.10018	0.600507
0.879019	1.02874	0.804909
	0.803772	0.658034
0.968051	0.882614	0.760169
0.967888	0.893294
0.892093	1.04092	0.676045
0.899691	1.01128
0.754377	0.986354	0.681782
	0.686844	0.644573
0.754853	1.01916	0.64375
0.820607	0.949855
0.973706	1.00358	0.614581
0.818808	0.92379
0.93222	0.780387
0.840389	0.796531	0.700935
0.804201		0.947503
0.846956	1.04499
0.871754	0.941859	0.863623
0.727017	0.924751	0.711183
0.969052	0.868587	0.610222
0.8055	0.755429	0.744728
0.807852	0.84677	0.70807
0.78841		0.802341
0.954812	0.814517	0.640307
	0.88889	0.738256
0.91092	0.942091	0.72219
0.867029	0.800951	0.742516
0.700434	0.867032	0.55118
1.09086	1.12943	0.566421
1.04156	0.883633	0.804805
0.784878		0.765345
0.778808	0.662784	0.641805
		0.577778
0.848743		0.663112
1.12821		0.780826
0.961545		0.854252
0.899349		0.844695
0.822512		0.663525
0.718455		0.762812
0.910512		0.624733
1.00205		0.823686
		0.697021
0.816937
0.793825		0.697538
0.714495		0.733915
0.916267
0.908286		0.639653
1.00819
0.989434		0.742514
0.910697		0.635361
1.07246
0.728298		0.702044
		0.702137
0.880009		0.749385
0.942457		0.764499
1.03351
0.896497		0.581666
0.913951		0.617491
0.991231		0.702878
0.872919		0.833917
0.872941
0.985911
1.02269
1.01062		0.711223
0.774195		0.66525
0.942868		0.819155
0.803922		0.723323
0.936398		0.662691
0.904638		0.688082
		0.815442
0.922319		0.739415
0.866622		1.00607
0.941203		0.749954
1.01156		0.80739
0.908021
0.848348
0.880088		0.841323
0.717798		0.752063
		0.750247
0.831858		0.740208
0.834016		0.827097
0.938778		0.676651
0.940695
1.09489		0.904822
0.818386		0.801673
		0.884177
0.862383		0.728678
0.746421		0.783999
0.838197		0.724114
0.815419
0.729581		0.725012
1.00124		0.733888
		0.605909
0.949912		0.741143
1.01104		0.744506
0.817147		0.702006
0.971354		0.661605
0.910607		0.61731
1.00695		0.715493
1.18627		0.56891
0.8162		1.02402
0.970643		0.803882
0.943614		0.691927
0.778973		0.659759
1.00677		0.636696
1.0721		0.632216
0.944583		0.833303
0.963941		0.684029
0.931347
0.974312		0.736818
0.814286		0.697882
0.987931		0.753882
0.950564		0.702874
1.15124		0.707665
1.0886		0.688968
0.774551		0.898451
0.777154		0.705573
1.02509		0.717811
1.0234		0.852671
0.805161		0.837077
0.843973
0.81833
0.909169
1.15907
0.849107
0.899541
1.05967
0.911804
1.03855
1.08553
0.950774
0.917267
1.04777
0.791475
0.971461
0.783872
0.84853
0.948286
0.712371
1.12936
0.868732
0.960631
0.868634
0.922714
0.998378
0.858274
0.88914
0.865099
1.04547
0.939891
0.76374
0.985208
1.14796
0.945867
0.71314
0.966092
1.03619
0.95605
0.875493
1.10059
0.934653
0.869453
0.911504
0.81996
0.875663
0.951884
0.975211
0.921822
0.8602
0.98226
0.937092
0.718777
1.11506
0.992462
0.75942
1.01602
0.835567
0.986413
1.08773
0.980876
0.904785
0.75835
1.02872
0.947503
0.915
0.879648
0.94499
1.07222
1.18424
0.792826
0.859172
1.00304
0.934655
1.05958
0.969664
0.870334
0.760532
0.805533
0.968683
0.879421
0.941793
1.06721
0.947199
0.944484
0.859196
1.00687
0.927841
0.71555
1.02219
0.725416
1.11837
0.870784
0.819436
0.934954
0.809869
1.00761
0.990267
1.0247
0.985276
0.960648
1.01267
0.70055
0.889525
0.868169
0.714043
0.895241
0.950277
0.943699
0.949947
0.899471
0.869319
0.876842
0.938574
0.75084
0.984851
0.920787
0.834312
0.834001
0.954266
0.899574
0.786131
0.762112
0.769643
1.05293
0.706667
1.02088
0.85041
0.728883
0.80683
0.935946
0.973545
0.86935
0.725891
0.860446
0.715978
0.981984
1.0313
0.876416
0.931142
0.805188
0.813474
0.876737
0.952556
0.990715
0.831988
0.802197
0.90487
0.811738
0.898782
0.879038
0.917271
0.715105
0.817589
0.838814
0.921131
0.925246
0.981069
0.891186
1.21923

## Sheet: TFEB_TR 30min rapamycin respon
TFEB_TR; 30min rapamycin response
vehicle	2nM Rapamycin	20nM Rapamycin
	1.03426
1.22168	1.1057	1.33621
1.44805	1.04345	0.90079
	0.970257	1.26547
	1.41857	1.20115
1.1711	1.33747	1.19904
1.08646		1.00944
1.33381	1.85041	1.42812
1.03303	1.2995	1.23455
1.4033	0.896959	1.08915
1.23721	1.35355	1.27082
0.979508	1.15647	0.780955
1.36542	1.18348	0.949531
1.22639	1.23145	1.38613
0.951348	1.15265	0.824713
1.56013	1.0979	1.19713
	1.32909	1.03626
1.19096	0.962912	1.03129
	1.20577	1.16126
0.896067	1.24104	0.858244
1.99157	1.25096	1.13408
2.12867	1.35872	0.848504
1.26543	1.08837	1.4855
1.46303	1.01445	1.26254
1.35297	1.51328	1.12414
1.46435	0.882626
1.03313	1.56433	1.93831
0.919448	1.164	0.800969
1.266	1.14363	1.19116
1.12799		1.11551
1.29095	1.10058	0.996529
1.19015	1.24631	1.15949
1.33473	1.49327	1.01676
1.67092	1.28016	1.24005
1.45034	1.22713
1.47758	1.13306	0.869515
1.69431	1.49177
1.10292	1.1243	1.1277
2.00964	1.09228	1.36301
1.09026	0.993266
1.59981	1.02822
1.18327	0.985313	1.03056
1.69681	2.14304
1.14338	1.46431
1.22976	1.40611	0.981263
	0.862951	1.80476
2.21547
	1.85539	1.08038
	1.19655	1.43368
1.19425	1.29197	0.999033
1.36252		0.835971
	1.11817	0.797791
1.25332	0.814288
1.21283	1.15061
1.16541	1.33389	0.987608
1.15396	1.14492
1.23256	0.93351	1.84148
1.39011		1.01704
0.97459	0.869141	1.01158
1.3463	1.14871	1.44675
1.42238	0.934685	0.950206
	1.13296	1.06596
1.36365	0.775052
1.35114	1.34621
1.16305	1.39445	0.794138
0.854247	1.68078	1.25147
1.27301		0.924836
1.31441	1.36122	1.25331
1.85534	1.4483	1.11843
1.3851	0.953655	0.976754
1.23989	1.4373	0.955656
1.30687	0.990689	0.932494
0.933812		1.12427
1.17548		1.12671
1.04232	1.16034	1.23352
1.53518	0.890475
1.19222	1.29451	1.20301
1.3417	1.42721	1.17857
1.09821	1.88112	0.862321
1.8051	1.15122	0.962754
0.921763	1.08791	0.814176
1.07784	1.76848	1.07156
	0.924562	0.929505
	1.03368	1.06674
1.01397	1.12	1.35901
1.32308	1.78479	1.35874
1.00427	1.04582
1.24959	0.905928	1.00545
0.983134		1.18135
	0.999649	1.19333
1.11643		1.10525
1.60028	1.02608	1.26649
1.40812	2.13572	1.05539
1.43225	0.761422	1.18439
1.50454	1.10069	1.10071
1.42016		1.11404
1.08595	1.02067	0.825419
1.30434	1.70196	1.12976
0.986022	1.10137	1.01922
1.19472	0.932955	0.948271
1.34425	0.861955	0.973731
1.16326	1.20389	1.09348
1.40642	1.3549	1.1115
1.98556	1.52538	1.21572
1.20044	1.313	1.38492
1.88135	0.978872	1.06306
1.90995	2.13284	0.733267
1.29225	0.840934
1.19424	1.299	1.29539
1.08455		1.16678
1.4564	1.18465	1.24024
1.31328	1.14989	0.883321
1.68235	1.16828	0.848358
1.69839		1.37748
1.14511	1.05978	1.26348
0.968702		1.25585
1.58453	1.02706	1.14498
	1.23203	1.17588
1.30244	1.02665	2.26205
1.13304	0.980656	1.21473
	1.10746
1.20916	1.28347
1.03082		1.08752
1.36114	0.88477	1.1437
1.29046	1.03935	1.15727
0.940843	1.48748	1.14465
1.12002	1.18626
		0.904321
1.01004	1.09819	1.0922
0.993581	0.889634	1.16999
1.29209	1.28041	0.965352
1.23492	1.23896	1.36851
	1.0508	1.02217
1.31404		1.26918
1.05494	1.04601	0.918132
1.26251	1.12157	0.858124
1.20352		1.16081
0.893184	0.954906
1.2352	1.29649	1.10474
2.25067	0.897927	0.93218
1.11234	1.30236	1.96657
1.44161	0.818299	1.16412
		0.904675
1.2576	1.19967	0.839585
1.25281	1.26378	0.884655
0.876744	1.52209	1.08652
1.33424	1.23439
1.34801	1.02749	0.829094
1.43052	1.13945
1.43754	0.845883	0.98092
1.19975	0.958802	1.12451
1.32706	1.16768	1.11861
	1.08871	1.07995
0.990692	1.17707	1.0816
1.19354	0.875708
1.87801	1.47256	1.04984
	1.53079	1.11766
1.1049	1.19712	1.14574
1.35963	1.04238	1.20506
1.23428	1.32789	1.25238
	0.919739	1.06305
1.16929	1.27364	1.20913
1.35452	1.01886
1.38408		1.09364
1.39367	1.08591	1.40354
1.39163	1.37888	1.24604
0.858618	1.17697	1.25854
1.45263	1.25131	0.995047
1.34128	1.15247	1.08377
1.09195	1.5521	0.90199
1.57769	1.19203	0.949758
	1.2914	1.10991
1.39154	1.20135	1.06083
1.45688		1.05993
1.42996	1.17968	1.32255
1.70237	1.1558	1.21996
1.4296	1.25015	1.08334
1.09144		1.03111
	2.1003	1.15795
1.25029	1.01742
1.52775	1.37374	1.03853
1.64464	1.29754
2.0463	0.909885	0.83723
1.06452	1.25918	0.943688
0.918001		0.956128
1.46453	1.24693	1.42441
0.938956	1.33955	1.29465
1.20099	0.863911	1.04389
1.88705	1.17367	1.07736
1.284	0.998337	1.04891
1.14677	1.07029	1.02547
1.24141	1.10439	1.4767
1.53896	1.174
1.15079	1.40012	1.06127
1.57172	0.90148	1.90361
1.27208	0.758565	1.19441
1.10628	0.885015	1.16734
0.859248	1.30729	1.13635
2.05677	2.0542	1.05729
1.12695	1.22196	0.839554
1.36233	1.13568	1.20835
1.64219	1.09748
1.35428	1.15693
1.25226	1.55429	0.713118
1.00629	1.09974	1.08164
1.15756	1.11822	0.99984
1.23707	1.04173	1.97731
1.32042	1.90511	0.963727
1.16531	1.04376	1.0929
1.09027	0.935438	1.16391
1.16604	1.04929
1.48178	1.2375	1.10134
1.11183	1.1271	1.28398
1.10221	1.11835	1.1628
1.02887		1.78548
1.4617	1.23149	1.02434
1.86162	1.2675	1.06881
1.02825	1.20283	1.10775
1.15626	1.23439
1.11794	1.17182	0.825165
	1.19151	1.3317
1.91231	1.37543	1.17538
1.3117	1.3612	1.23834
1.1266	1.38154	1.16651
1.24674	1.35964	0.918764
1.19328		1.2499
1.31866	1.12703	1.41919
	0.987311	0.901694
1.36773	1.00367	1.41359
1.37207	0.989486	1.1949
1.15912	0.907913	1.23941
1.23191	1.19798	0.796587
1.03218	1.24279	0.901207
0.859675	1.28351	1.18625
1.21689	1.25149	1.09809
1.32059	1.02392	1.23104
1.2067	0.97973	1.1215
1.44502	1.06482	0.963092
1.29089	1.16298	1.244
1.11767		1.01447
1.39414	0.820235	1.21291
1.44064	1.43708	1.08914
0.940651	1.017	0.725033
1.53398	1.04898	1.57679
1.2159	1.3442	1.35837
1.26132	1.17626
1.31896	1.25876	1.21992
1.04661	0.9437
0.944233	1.09516
1.09049	1.13452	1.22739
1.25988	1.05112	0.870792
1.28441	0.917786	1.05153
0.849704	1.22518	1.32881
1.60366	1.11773	0.902617
0.875414	1.40746	0.823174
0.89009
	1.40163
1.41702	0.963511	1.00714
1.06361	1.4272	1.19579
1.3566	1.4332	1.20634
1.19166	0.856731	1.21423
1.17385	0.970925	1.19602
1.63329	0.80848	1.06255
1.23688	1.14208	1.25737
0.909046	0.999635	1.12137
1.2901		1.13576
1.2851	1.40252	1.4713
1.23353	1.37859	0.909427
1.55021	1.30398	1.38276
0.953679	1.11929	0.87847
1.39896	0.910803	1.72243
1.38112	1.07795	1.26659
1.35999	1.18874	0.750391
1.23309	1.14491	1.19672
1.26455	1.15122
1.20473	1.84471	1.35984
1.11951	0.934342
1.71594	1.18429	0.794001
1.0637	1.35792	1.15706
1.24152	1.02976	1.0082
1.21796	0.985978	1.12448
1.36487	0.759317	1.02904
1.05321	0.896426	0.95918
1.04753	1.59546
1.21342	1.06325	0.971067
1.25351
1.1548		0.944713
1.69657		1.23008
1.08447	1.49116	1.20399
1.12148	0.944692	2.10257
0.980611	1.53625	1.20702
1.28351	1.43266	1.13785
1.23221	1.31741	1.42484
1.32362	1.1658	1.20694
1.05302		1.65284
1.53068	1.29513	1.0841
1.01569	1.24255
1.24136	1.24863	1.03113
0.914643	1.36783
1.26749	0.995752	1.81289
1.5008	1.22492	0.92111
1.02197	1.16825	0.922428
1.00566	1.08653
1.38513	1.13539	0.913289
1.20609	0.945685	1.06337
0.991555	0.98837	1.28361
0.922847	1.21331	1.18423
1.21309	0.824727	1.23099
1.41653	1.18915	1.13509
1.18764	1.27736	1.01965
1.23496	1.22453
1.08832	0.926058	1.5832
0.966069	1.22376	1.37905
1.13067	1.20388	1.4036
1.60214	1.59677	0.915502
0.894937	1.13915	0.923988
1.47577	1.57882	1.48493
2.09338		1.06963
1.24181	1.14421	1.38582
1.53662	1.12886	1.44011
1.73931
1.12314	1.15814	1.03569
1.09778	1.20656
1.09613	0.996586
1.14752	1.02684
1.27557	1.05377	1.98254
1.11159	1.03746	1.3652
1.33764	0.951651	1.13516
1.14969	1.18737	1.29724
1.30156	0.883248	1.22694
	0.882005	1.11591
1.52523	1.17811	1.33947
1.14341	1.33926	1.86947
1.28161	1.27406	1.17718
1.21666		0.921748
1.40202	1.14216	1.39777
2.02149
	1.35839	1.14678
0.999387	1.16974	1.01123
1.06685	2.01913	1.17147
1.13113	1.15171	1.07006
1.1046	0.868431	2.2332
1.25142
1.10432	1.24814	1.13644
1.1423	1.26874	1.1034
	1.39117
	1.1397	1.1691
1.02443	1.30603	0.999333
0.836064		1.25746
1.19645		1.31508
1.58327	1.19867	1.09811
1.16313	1.24282	1.22805
0.982371	1.32963	1.05426
1.2526	1.1579	1.01053
1.00313	1.27895	1.78679
1.06705	1.10822	1.18068
1.00493	1.48008	0.963141
1.37266	1.12082	1.15476
0.901285	1.16383	1.08964
1.18158		1.39759
1.40601		1.22829
1.0693	1.02813	1.82981
1.20204	0.979968	0.97589
1.15308	0.925706	1.06925
1.67125	1.08897	0.802974
0.936707	1.32283	0.812087
1.49691	0.863757
1.23665		1.191
1.00145	1.16906	1.11948
1.75295	1.0693	0.886292
1.73006		1.22904
1.23439	1.06465	1.36407
1.03663	1.09956	1.04799
0.958664	1.44882	1.13937
1.54641	1.50569	1.21635
1.3099	1.11009	0.981444
1.07617	0.910678	1.18907
0.878826	0.848212	1.23633
1.10421	1.71285	0.977152
1.41427	1.26768	0.983803
1.12677	0.932415	1.0349
	1.34554	0.871403
1.29497	0.917048	0.974361
1.08774	0.921484	1.32262
1.17883	1.16872	1.07424
1.11406	1.19665	0.79969
1.21463	0.98963	2.11935
1.14293	1.12467	0.811805
1.15618	1.13996	1.03554
1.41716	1.32196	1.10554
1.24375	1.15348	1.58004
0.966692		1.03076
1.22145	1.27886	1.07072
1.0343	0.87037	1.02133
1.06108	0.974322	0.998171
1.3243	1.24023	1.55373
	0.942689	0.931139
1.27228	1.16071	0.939459
1.641		0.989307
0.847193		0.915587
1.49922	1.30299
1.30951	1.14321	1.06083
1.21686		0.738572
1.37658	1.09264	1.30477
1.4489	0.936893	0.82181
1.03439	1.09619	1.18283
	0.896289	1.03865
1.2087	1.14784	1.08095
0.875666	1.27981	1.11479
1.58873	1.19435	1.04834
1.02328	1.0669	0.889058
0.823158	1.0027
1.52767	1.42591
1.41204	1.0012	1.21518
1.02206	1.29431	0.966237
1.30507		0.881888
	0.95211	0.970138
0.882026	1.08722	1.40132
1.1755	0.943535	2.11809
1.14499	1.26793	1.0612
1.15144	1.10719	2.1272
1.00377	1.16876	1.08977
	0.931502	0.972297
1.42552	1.15995	0.995238
1.09568	0.941461
0.988188	1.00734	1.28111
1.34588	1.09848	1.11488
1.20992	1.19729	0.958651
1.15989	1.20384	0.996146
1.19006	1.18938
0.996143	1.12702	1.13762
1.0257	0.849215
0.832849	1.13287	0.944494
0.919941	1.04725	1.51005
1.62898	1.19537	1.02135
2.11858	1.47333	0.995505
1.02663	1.28485	0.987854
2.2702	1.16027
		1.18252
0.914934		1.01364
1.41155		1.23054
	1.27349	1.13174
1.37591	1.40686	1.55235
1.304	1.15242	1.22637
0.968493	1.69359	1.23685
1.13778	0.910157	1.02294
1.16388	1.09711	0.797338
1.06034	1.53658
1.95464		1.0902
0.809731	1.04531	1.10297
1.08404	1.27146	1.02586
0.934309	1.07946	1.32848
1.32748	0.968512	1.15165
1.51461	1.18334	0.996534
	0.929867	1.26962
1.41114	1.26664	1.99203
	1.10706	0.964116
1.22236	1.21068	1.12317
1.43097	1.35139	1.87449
	0.974715	0.970204
1.37758	0.986262	1.09971
	1.30493	1.19521
1.21878	1.05894	1.55956
1.17102	1.26445	1.15683
1.00593		1.34046
0.98163	1.41369	0.923502
1.17011	0.878718	1.03063
0.976893	1.18199	0.89551
1.21331	1.02394	0.966954
1.1344	1.16911	1.20876
	1.38712	1.1793
1.19423	1.08072	1.27184
	1.33944	0.85475
1.45076	1.1237
1.2015	1.1467	1.01294
2.02414	1.1131	2.16518
1.24604	0.959394
1.09782	1.02845	0.933944
	1.17063	1.29514
1.04463		1.35334
1.34713	1.03148	1.18181
0.931051		1.34981
1.01862	1.0145	1.04695
1.26621		1.01981
	0.858629	1.05723
1.0802	1.02746	1.48871
1.24948	1.08669
	1.36889	1.06648
1.21228	1.08753	1.34322
	1.08225	0.975681
1.11323	1.66732	0.941678
1.11616		1.1262
0.926957	1.22967	0.723207
1.1734	1.07179	1.51843
1.36699	0.999235	0.941308
2.01808	0.959386	1.09713
0.870363	0.983455	1.00824
1.06605	0.794777	1.42371
1.38186	1.00805	1.28185
1.25093	1.66771	1.11918
1.2841		1.09146
1.24616	1.16207	0.947508
1.09176	1.01324
1.06531	1.27839	1.26203
	0.959493	1.12057
1.08801	1.34055
	1.24251	0.9891
1.1039	1.26985	1.3406
1.16552	0.802488	1.35494
1.17591	1.05797	1.17145
1.30595		1.13305
1.30909	0.852557
0.919831	1.11262	1.30022
1.42783	2.00555	0.83893
1.09132	0.88916	1.11687
1.29321		1.26248
1.24715	1.02037
	1.06025	1.22226
1.34252	1.53506	1.03136
1.18956	1.02712	0.985881
1.21147	1.4551	1.14297
1.02044		0.782415
1.04042	1.26806	1.2879
1.0162	1.14293	1.09736
1.30666	1.3945	1.12147
1.25179	1.292	1.08701
1.17077	1.59959	1.19863
1.38692	1.03721	1.3134
0.992688	0.957692	1.28028
1.00267	1.13111	1.4785
1.07078	1.02508	0.833253
1.0209		1.13474
0.989382		0.817288
0.923758	1.42931	1.15233
1.25664	1.02796	1.21577
1.20159	1.04069	1.09562
1.23453	0.839336	1.57951
1.18949	0.939719	0.925305
1.22049	1.32448	1.2995
1.18415	1.04362	1.28184
1.72319		1.24296
1.12318	1.08586	1.00195
1.17974	1.1718	1.21225
1.03636		0.982815
1.04754	0.964958	1.09515
1.29538	1.1688	1.78918
0.98067	0.777378	1.12629
1.29134	0.929024	1.25367
1.29136	0.929277	1.24126
1.64132	1.07005	1.93641
	1.14325	0.988631
1.53857	1.35437
1.26824	1.58242	1.19161
1.03064		1.0268
1.23418	1.51325	1.277
	1.19084	1.1542
1.29931	1.2115	1.1474
1.02212	1.41616	0.988203
1.61336	1.20522	1.18174
1.27281	1.127	1.10651
1.1702	1.10013	1.0654
1.24132	1.14022	1.14484
1.1483	0.760272
	1.78902	1.93412
1.27723	1.47597	1.16981
0.98126	1.09111	1.49238
1.37987	1.0458	1.08978
		1.0529
1.06843		1.03161
1.39631	1.11822	1.39281
1.28518	1.04177	1.01621
0.967965	1.14032	0.742699
1.11665	1.13736	1.03414
1.21471	1.23233	2.03824
0.985407		1.9712
1.26432	1.09348	1.23673
1.23827		1.23743
1.34422	1.11278	1.17834
	0.881565	0.866036
1.04527	1.47498	0.978724
1.1182	1.32737	1.24094
1.23584		0.957616
1.28723	0.995658	1.99645
1.37205	0.926681	1.26015
1.2822	0.993019	0.753873
1.3399	0.783923	0.88188
	0.824723	1.17239
1.47927	1.01981	1.0672
1.11451		0.874691
1.34283	0.990819	1.09516
1.20697	1.47612	1.08831
1.25015	1.05882	1.15685
1.17123	1.0416	1.21737
1.86196	0.943089	0.91438
1.18495	0.978411	1.03801
1.30174	1.01598	0.898434
1.59187
1.20258	0.926086	0.878468
2.06733	1.40044	1.65693
1.34519	1.13842
1.2477	1.28831	1.05544
0.93351	1.27368	1.13711
1.10404	1.04206	1.10661
1.45276	0.918504	0.997651
0.837284	1.1759	0.959146
1.35433	1.12269	0.996608
	1.08737	1.11857
1.1545	1.09843	1.01583
1.05941	1.28105	0.882914
1.44946	1.17112	0.973397
1.60998	1.10866	1.25345
1.15221	0.970864	1.19912
	1.21427	1.07773
1.19141	1.02348	1.23674
	0.963736	0.913547
1.19054	1.21019	1.13591
1.02429	1.25918	1.59982
1.40734		0.969004
1.20156	1.66
1.28288	1.1655	0.981758
0.988618	1.05292	1.20488
1.27317	1.31939	1.49034
1.30972
1.29017	1.05199	1.19746
1.18699	1.31284	1.08437
1.22394	0.851174
1.41283		1.28936
1.16298	1.45804	1.077
1.07646		1.23509
1.05099	1.27588	1.00706
1.41698	0.982205	1.16
1.41588	1.15354	1.47217
1.17753	1.27139	1.0801
1.08598	1.24311	1.66043
1.21582	1.27775	1.17617
1.37851	1.01848	1.03307
	1.20679	1.14449
1.43346	1.73936	1.17643
0.898932		1.50852
1.08191	1.59419	1.09453
1.6268	1.19971
1.15447	1.03219
1.25367	0.78811	0.895898
0.989172	0.832014	0.791645
1.13836	0.942798
1.25577	1.14305	0.838946
1.4251	1.16169	1.17196
1.15906	1.12035	1.14953
1.25927	1.1029	1.58249
1.18148	1.2193	0.776177
1.16179	1.25795	1.11022
1.28984		1.072
1.3625	1.33252	0.983455
1.04811		1.06769
1.36234	1.33051	0.961651
1.33354	0.789629	1.1077
1.33046		1.31573
1.30325	1.19604	1.1123
	1.19808	1.10729
1.21518	1.14112	1.11252
0.934146	1.08206	1.0284
0.849682	1.22761	0.849609
1.2415	1.14767	1.46359
0.993371	0.925867	1.1093
1.14658	1.21732
1.3124	0.902463	0.787613
1.31989	1.24856
1.3768		0.86628
1.81403		1.17913
1.10732	0.994548	1.10794
1.3503	1.12943	1.07611
1.15882	1.49429	0.890677
1.28761	1.13035	1.22789
1.95376	0.932356	1.95569
0.966212	1.0025	0.948787
1.17147	1.05477
1.42637	1.1144	1.44902
1.34739	1.26838	0.800216
1.35137	1.09653
1.35527	1.7017	1.18752
	0.999982	1.01523
0.972104	1.11256	1.00024
1.10253	1.17987	1.43215
1.0774	1.2484	1.55481
1.25864	1.1552	1.6463
1.27952	0.94312	1.41646
		1.24598
1.09169	1.01094	1.03086
1.40115	1.29048	1.3534
	1.07784	0.991063
1.07927	0.818743	0.985973
1.24035	1.38667	0.937674
1.13026	1.15812	1.40048
	1.1303	1.0247
1.461	0.929005	1.19234
1.22619	1.22325	1.22309
1.32114	1.05022	1.0563
1.12035	1.04923	1.23682
1.28972	1.06941	1.09296
0.951709		0.983923
1.25169	1.09556	1.07428
1.33107	1.32653	1.09829
1.10733	1.38471	1.41082
1.02416	1.11825	1.18482
0.874618	1.35501	1.01023
1.08878	1.57019	1.14206
0.896791	1.00539	1.03868
0.916254	1.1106	0.968642
1.27431	0.947354	1.10756
1.41086	1.20748	1.39698
	1.13502	0.766473
1.47262	1.13121	0.935768
1.87528	1.14804	1.96767
	0.983171	0.893627
1.3146	1.09629	1.19495
1.23279	1.29275	1.23396
0.925154		1.09635
1.67669
	1.23629	0.985758
0.891569		1.24119
	1.10676	0.987725
1.04721	1.25223	1.22928
1.19987	1.15829	1.036
	1.08318	1.25728
1.29764	1.32485	1.85929
1.33301	1.00018	1.11544
	1.01695	1.20191
1.23273	0.780694	1.41628
0.965525	1.35008	1.22293
0.95776	1.10941	1.37727
1.74096	0.748824	1.8111
1.18162	1.12793	1.20098
1.26142	1.10742
1.2132	1.23528	1.22451
1.34991	1.75748
1.11474	0.995636	0.908425
	1.01934	1.14775
1.10023	1.27296	1.11199
1.36487	1.48942	1.09434
1.34001		1.11124
0.907788	1.2258	1.01695
1.10339	1.28288	0.946408
1.1104	1.46107
1.18539	1.098	1.03698
1.3586	1.17613
1.09747	1.83446	0.959199
1.0771	1.04672	1.1859
1.18216		1.97222
1.03195	1.37579	1.12806
0.949022	1.14883	1.07515
1.56141	1.24137	0.925002
1.20408	1.43243
1.2163	1.07094	1.15991
1.15216	1.20897	0.990371
1.1334	0.935067	1.13635
1.30896	1.17984	1.34173
1.22989	0.958792	1.14398
	1.25216	1.09673
0.907865		1.28451
1.17666	2.06614	0.786093
1.01372	1.01522	1.06481
1.15661	0.828583	1.33759
1.38213	0.803781	0.98871
1.06702	1.06356	1.02879
1.04648	1.06289	1.46172
1.1418	0.962876	1.34255
	1.24932	1.12639
0.954029	1.72946	1.07902
1.21204	1.05338	1.19831
1.34642	1.28286	1.06719
1.24322	0.987916	1.34448
0.927444	0.887879	1.13253
1.02942	1.09071	1.10586
1.43661	1.21077	1.2483
1.26398	1.1436	1.21229
1.66753
0.972121	0.876275	0.960963
1.32528		1.34566
1.18598	1.11574	1.05086
	1.26358	1.01122
1.08856
1.12804	1.72862	1.12856
1.03171	0.891923	1.04087
1.03843	1.19857	1.00292
1.10184	1.25696	1.46105
		1.41233
1.22779		1.50385
1.07053	1.13672	1.30858
1.27246	1.87758	1.21624
1.29038		1.1067
1.15264	1.09591	1.17954
1.16041	1.16738	1.22339
1.28006	1.45297
1.26055	1.43751	0.96212
0.959776	1.15466	0.979511
1.19397	1.29411	1.02307
	1.11889	1.3178
0.839821	1.27163	1.04849
1.18097	1.32625	1.42295
1.78463	1.21743	1.14519
1.36966	1.43818	1.17255
1.45987	1.06599
	1.36131	1.16194
1.18595	1.47292	1.21212
1.07958	1.46273	1.14392
1.17477	1.24137	1.06193
	1.19002	1.27852
	1.07805	1.05447
	0.943883	1.23104
1.14776	1.15372	1.20339
0.971977	1.52199	2.09519
1.18998	0.996204
1.44684	1.12446	1.0908
1.00012	1.82599	1.31607
1.47811	1.13777	1.01744
1.08447	1.3269	1.44007
1.29557	1.04622
	1.19222	1.20139
1.19518	1.30059	0.974774
1.26553	0.974479	1.92487
1.84212	1.24231	1.04407
1.32871	1.88516	1.9607
	1.19771	0.971287
1.25559	1.35391	1.28127
1.155	1.00968	1.0058
1.15202	1.1965	1.38962
0.98221		1.0784
2.08431	1.39091	1.43695
0.88181	1.17049	1.2913
0.966528	1.54175	1.14057
1.06025	1.27283	2.02538
1.38833	1.12706
1.08028	2.2704	0.921196
1.35528	1.18881
1.36114	1.42464	1.20863
	1.18179	0.962598
1.27922	1.0976	1.15139
1.26909	1.3569	1.12697
1.16622	1.23006	1.26962
1.32034	1.38438	1.71574
1.40866	1.07464	0.752961
1.33567	1.2075	1.07618
1.18972	1.30611	0.986683
0.954529	1.31921
0.969687		1.02692
1.36044	1.33712	0.971017
1.15926	1.47389	1.17154
1.31575	0.943105	0.789672
1.14304	1.26801	1.03987
1.27023	1.1333	1.47564
1.1654	1.02695	1.27876
1.2594	1.53599	0.970681
1.17029	1.15453
1.02313	1.21344	0.878964
1.11959	1.06338	1.36201
1.47155	0.897679	1.09379
1.07812	1.28135	1.13384
1.65213		1.09652
1.04709	1.53987	0.903848
1.1272	1.01544	1.11349
0.864133	1.80346	1.24965
0.803896	2.27992	0.962244
1.15719	0.990284	1.23422
1.06706		0.999597
1.1995	0.924318
1.41972
1.15825	1.43327	1.08535
1.12723	1.14027
0.996903	1.22785	1.41085
1.62677	1.22545
1.30256	1.21616	1.0249
1.0533	1.36188	0.905684
1.00076	1.28032	1.0976
0.901443	1.28781	0.92087
1.20588	1.20142	1.09191
	1.08614
1.61269	1.26914	1.00433
1.23144	1.30341	1.4336
1.15408	1.20335	0.99013
1.31041	1.25786
1.21253	1.18437	1.36096
	1.33833	0.967034
1.27644	1.3872	1.19276
1.00738	1.36996	1.1991
1.1408	1.12629	0.918488
1.37696	1.39444
1.06324	1.62797
1.43904	1.31018	0.863848
0.932561		1.32196
	1.50932	1.2823
1.37751	1.2463	0.947186
1.25412		1.35593
1.34082	1.3297	0.976029
		1.11265
	1.32588	1.00678
1.04451	1.14024	1.0467
1.30851	1.33986	1.20416
0.863915		1.2215
1.11505	1.90479	0.966363
1.60403	1.25212
1.19433
1.40382	1.63133
	1.69485	0.767021
1.36934	0.837831	1.27985
1.36455	1.33701	1.33366
1.13164	1.05007	1.26408
0.903861	0.816458	1.68645
1.13934		1.3271
1.12797		1.37598
1.36892	1.29388	1.15599
0.972891	1.0879	1.21454
1.25669	1.1944	0.871416
1.17704	1.21604	1.53493
	1.25497	1.29844
0.911921	1.12793
1.76612	1.42393	1.17401
1.14436	1.22049	1.11705
1.20216	1.35883	1.25135
1.31819
1.87578	1.32822	0.751201
1.17567	1.1086	1.0948
1.33757	2.33504	1.0466
1.75706	0.934307	1.09015
1.52047
1.19037	0.932911	1.93535
1.20175	1.12967	1.26178
1.06764	2.16152
1.14628	1.18888	1.07904
1.28593	1.25324	0.785625
1.1806	1.3431	1.03941
1.00114	1.1522	0.958402
1.49724	1.43653	0.899202
	1.34069	1.29172
1.31427	1.19401	1.22743
1.02815	1.15926
1.28556	1.15075	1.04621
1.08004	1.38191	0.998168
0.964276	1.13442	1.29905
1.46767		1.14002
1.50823	1.37639	1.14782
1.13736		0.937731
1.08149	1.18396	1.26013
1.35656	1.22234
	1.24123	1.23481
1.10293		1.04466
	1.08259	1.42667
1.27986	1.05733	1.23287
1.36058	1.17453	1.48342
1.13016	1.27789	1.21959
1.31256	1.00848	1.01373
1.10321	1.66586
1.42878	1.33545	1.40118
1.21304	1.59228	1.12068
1.26205	1.20872
1.29224	1.04498	0.84551
0.864811	1.0558	1.30071
1.2794	1.57777	1.00951
1.05227	1.12632	1.03755
1.29647		1.65016
1.38685	1.2314	1.25425
1.2879	1.03569	0.938705
0.866232	1.34017
1.16263	1.19741	1.06291
1.86231	1.11903	1.73276
1.07682	0.987108	1.10487
1.24504	1.24737	0.961149
1.05771	1.23299	1.07888
1.10734	1.10131	0.834966
		1.06604
1.342		1.028
1.22272	0.898118	0.91755
1.07367	1.12994	1.19156
0.918764	1.11986	1.04298
0.880968		0.918037
	0.825977	1.03427
1.23108	1.43546	1.55225
0.998323	0.830294	1.22455
1.31569	1.15165	1.15009
1.29636	0.96695	0.808602
1.14909	1.2727	1.24367
1.07627	1.22158	0.967637
1.00216	2.31373	1.49699
0.898914	1.7119	1.1804
1.18137	1.02351	1.13116
	1.17495	0.892443
	1.07565	1.56413
	1.68735	1.32635
1.05013	1.34653	1.21887
1.01582	1.65942	1.07392
1.6788	1.28693	1.19391
1.24887	1.49501	1.49152
1.31968	1.27499	0.973726
1.22444	1.2455	0.975463
1.38602	1.25332	1.14698
1.5407	1.43673	1.09492
0.858166	1.17928	1.25356
2.08806	1.0774	1.03207
1.15502	1.09362	1.05711
1.13484	1.15329	1.10377
1.0082	1.05971	1.16233
1.09993	1.15901
1.25618	1.26636	1.17784
0.883127	1.54157	1.07909
1.21628	1.39094	1.26394
0.935191	1.03385
1.12582	1.14376	1.03736
	1.25166	1.23377
1.06806	1.34137	1.08189
1.25736	1.18062	1.29471
1.68181	1.16689
1.10176	1.23894	1.12106
1.47448	0.988049	1.20284
	1.38427	0.890403
1.10045	1.44556	1.07506
1.10721		1.0671
1.32267	1.05649	1.28957
	1.37168	1.10559
1.12366	1.15058	1.11762
	1.26982	0.839981
0.958729	1.43967	0.935537
1.42238	1.34023	1.02263
		0.93561
		1.19964
1.31604	0.821355	1.0643
1.26327	0.860341
1.25333	0.95471	1.1707
1.16107	1.30171	0.914018
1.18683		1.31854
1.23475	1.07922	1.22728
0.960596	1.30798
1.34444	1.1147	1.16927
	1.11627	0.986205
1.21209	1.16833
1.1189	1.0503	1.23348
1.15682	1.49211	1.29679
	1.24755	1.29428
0.969264	1.22967
1.35102	1.07428	1.21578
1.19773	1.19575	1.12264
	1.27922	1.33042
1.14428	0.938061	0.920943
0.974851	1.19279	1.22848
2.01701	0.830612	1.11489
1.27387	1.26994	1.18046
	1.19676
1.13084		1.2063
	1.13102	1.7126
2.15157	1.17604	1.07396
1.13969	1.30801
1.03665	1.2813	1.12009
1.48236		0.942436
1.37345	1.24816	1.02338
0.961242	1.24861	1.00782
1.21521	1.53989	1.12491
1.23738		1.22266
1.30666	1.36582	1.19789
1.35136	1.18516	1.46566
0.865962	0.884011	0.976876
1.3594	1.27249	0.97022
1.06447	0.892664
1.32911	1.13391	1.11831
1.21987	1.21607	1.03924
1.1268	1.22743	1.21671
1.35916		1.50983
1.47974	1.18205	0.73691
1.29211	1.19929	1.43107
1.31512	1.16065	0.836447
0.870493	1.057	1.13543
1.24032		1.02803
1.38588	0.991772	1.18673
1.38099		0.924664
1.26317	1.2767
0.946126	1.2567	1.37862
1.47184	1.20877	1.06899
1.38355	1.33076	0.817193
1.17826	1.35769	1.32895
1.34404	1.17462	1.03346
1.03506	1.1875	0.741568
1.0206		1.23482
1.35906	1.16769	1.22106
1.01967	1.43828	1.24986
	1.27835	1.17469
1.45622		1.21344
1.68488	1.22176	1.26775
1.48121	2.09967	0.812072
1.59998	0.872076	1.16058
1.31565	1.08798	1.01023
1.4291	1.50056	1.63618
	0.885613	0.91653
1.24502	1.38988	1.27236
1.09953	1.22752	1.07878
1.2855	1.4465	1.17818
1.28833
1.10686	1.28637	1.06734
	1.22882	1.38027
1.35686	0.994039
1.07252	1.41067	1.27896
1.21442	1.12542	1.28583
1.19654	1.03594
1.39725	1.23686	0.784094
1.09403	1.04665	1.37934
	1.17124	0.857125
1.23545		0.913769
0.969104	1.22379	1.13235
1.25825	1.95743	0.842861
1.72679	1.29278
0.920001	1.30687
	1.3451
1.13862	1.21029	1.59368
1.26386	1.20895	1.13403
1.1819	1.09768	0.992134
1.16496	1.32908	1.9588
1.24637	1.12961	0.897681
1.13972	1.56514
1.27738	1.12502	1.20605
	1.20151
1.27112	1.40817	1.34391
1.11083	1.50721	1.00859
1.14725	1.16398	0.904605
1.01244	1.02929	1.87
	0.931855	1.18354
1.21962		1.10292
1.02403	1.05331	0.96454
1.06764	1.82824
1.44304	1.09576	1.12273
1.2804	0.993984	0.945126
1.00221		1.08558
	1.46285	0.938574
1.0351	1.32201	1.34637
0.828091	1.21775
0.967005	1.25779	1.3272
1.2044		0.988386
1.2258		1.47288
	1.21832	1.08792
1.27671	1.38934	1.43244
1.0237	1.06166
1.48856	1.23085	1.1393
1.37164	1.13984	1.08837
		1.22239
1.08917	2.45789	1.18786
0.919553	1.57031	1.10283
1.30449	1.10239	1.08092
1.27583	1.03063	1.01575
1.1686	1.2274
1.04479	1.20355	0.826561
0.97001	1.19785	0.982491
1.01852	1.16694
1.01624	2.43098	0.819866
	1.1914	1.16467
1.10782	1.05872
1.21751	1.43317
1.14217	1.26651	1.02108
0.948294	1.48677	0.994273
1.60509	1.15886	1.01543
1.10479	1.33724	1.03596
1.32035	1.6554
1.5958	1.02841	1.24844
1.5097	1.00644	1.1644
1.67039	1.18992	1.34155
	1.46138	1.27828
1.11288	1.04804	0.824765
1.32422
1.16302	1.24737
1.49888	1.28252	1.13469
1.17056	1.35679
1.29321	1.08912	1.4948
1.02964	1.30348	1.24831
1.24788	1.06919	1.14287
1.49508	1.43225	0.820224
0.979881	1.31991	1.29137
1.28111
1.15769	0.890526	1.37125
	1.2635
1.27647	1.11918	1.15735
0.924847	1.18057	1.3924
1.15127	1.48261	1.25163
1.15968	1.32863
1.11312	1.15324	1.11604
1.19905	1.23106	1.17485
1.13295	1.25938	1.44282
1.27066	1.0784	1.10723
1.74277	1.01551	1.03016
	1.39048	1.0633
1.1216	1.91579	0.95323
1.32465	1.15315	1.95122
1.25237	1.40196	1.10322
	1.33039	0.925469
0.928044	1.13564	1.26887
1.03977	1.31499	1.3088
	0.907871	0.933083
1.39457	1.26798	1.03677
1.23917	1.16444	1.08748
1.31262	1.09809	1.01546
1.42507	1.24224	0.795776
0.966418	1.12441	1.27616
1.15629	1.9556	1.1044
1.19791	1.29378	0.995571
1.06285	1.45295	0.859991
1.47802	1.24567
0.81862		1.00993
0.95752	1.3969	1.07673
1.08506		0.893056
0.993588		0.923594
1.21107	1.21179	1.27578
1.84767	1.7563	1.28856
1.15042	1.12492	0.908012
1.56999	0.871655	0.910669
1.13049		1.14732
1.28045	1.20369	1.2914
	1.65157	0.945292
1.10106	1.48752	1.0583
1.29462	1.19159	1.65479
0.940098	2.46786
1.19183	1.07869	1.32661
	0.921388	1.01293
1.06711	1.00206
1.6356	1.19365	1.11606
1.23783	1.02763	1.03066
1.28419	1.32249	1.26671
1.40677	0.995813	1.0445
1.4136	1.0676	0.987614
1.08266	1.75155
1.26114	1.06713	1.19545
0.964517	1.31783	0.948584
1.21841	1.30934	1.02694
1.17356	1.17345	1.11967
1.12447	1.20854
1.19627	1.0021	1.54726
1.29001	2.40024	1.08288
1.04061	0.894995	0.821462
1.21143	1.38388	0.989909
1.74512	1.16154	1.15082
0.873096	1.17143	1.12531
1.14059		1.81049
1.1245		0.856888
1.07487	1.06937	1.11799
1.13713	1.344
1.35585		1.15177
1.19939	1.33675	1.07059
1.02089	1.22999	0.915732
1.15042	1.09834	1.05511
1.48686	1.05038	1.09728
1.04762	1.23217	0.887724
1.25126	1.1579	1.58727
1.58154	1.06049	1.23247
0.933747	0.953784	1.09611
0.994884	1.0965	0.994681
1.16858	1.02391	0.965112
1.44432	1.23271	1.07137
1.17906	1.34761
1.31903	1.31828	1.00805
1.06933	1.1615	1.24295
1.22576	1.27894	1.29801
	1.10522	1.09108
1.25412	0.959439
0.880149	2.26771	1.22036
0.831541		0.983171
1.06104	0.836897	1.10605
1.06192		1.03591
1.20291	1.10554	1.0671
1.07322	0.907404	1.21694
1.46709	1.17214	0.897806
1.10514	1.10201	1.30218
1.35397	1.07251	1.17903
1.41208	0.96243	1.17022
1.07275	1.45595	1.37836
1.22973	1.03711	1.07049
1.08957		1.47714
	1.44024	1.40038
1.46712	1.01145	0.953607
1.13171	0.977143	1.68112
0.889523	1.17083	0.759785
1.28509		0.990992
0.865399	1.11365	1.27384
1.06378	1.11786	0.820532
1.22561	1.35287	1.00175
1.57048	1.53541	1.05559
1.17525	0.948898	1.32286
1.34137	1.17653	1.2166
1.01165	1.11407	1.08358
	0.866583	1.44105
1.46156		0.969554
1.08314	1.15653	1.00651
1.3085	1.37831	1.18967
1.21148	1.29832	1.14665
	1.09243	1.20462
1.35591	1.28876	1.40828
1.33448	1.20538	0.807112
0.939597	1.47176	1.05438
1.23513		1.13073
1.47031		1.42633
1.20663	1.23055	0.915838
1.08728	1.86605
1.10748	1.6913	1.14272
1.18819	0.857449	0.857494
1.12135	1.23474	0.965319
	1.30751	1.35647
1.11242	1.39366	1.15497
1.35344		0.900406
1.0107	1.17881
1.74905	0.977849	1.20096
1.21805		2.04482
1.31009	1.58944	1.20045
1.10159	0.99099	1.30048
1.49738	1.67916	0.904884
1.09879	1.30613	1.16878
1.07194	1.44279	0.830588
1.18849	0.939714	1.55172
1.09666	1.00054	1.02688
1.25127	1.52913	0.895479
1.29457	1.21105	1.11804
0.950067	1.21422	1.6835
0.874624		1.2771
	1.32777	1.24205
1.22952	1.24921
1.41448	1.45038	1.34447
1.20071	1.57774	1.05129
1.2635	1.04591	0.918997
0.966617	1.17027	1.22229
0.981366	0.987757	1.27925
1.03365	1.27708	2.01041
1.08772	1.31044	1.0947
1.30789	1.36518	1.20793
0.944205	1.46702	1.05363
0.989281	1.31045	0.91494
1.06261	2.40136	1.23573
1.08889	1.29954
1.27066	1.42409	1.26293
1.08194	1.17611	1.03932
1.20879		0.776177
1.50476	1.16204	1.04976
	1.13993	1.18186
1.12229	0.909435	1.06065
1.10018		0.997345
1.26947	1.11419	1.18986
1.18412	1.29763	0.939322
	1.12073	1.07071
0.835809	1.35924	1.22859
1.48951	1.07856	0.82409
1.09145	1.09418	1.56129
1.35692	1.37654	1.34314
1.17076	1.26208	1.05735
	1.21952	0.952358
1.26199	1.0541	1.45003
	0.987342	1.02387
1.2741	1.1435	1.36612
1.05457	2.35309	1.23587
1.13466	1.05841	1.0294
1.15397	1.15167	0.865896
1.11825	1.2507	1.12055
2.00732		0.891139
1.51458	1.41193	1.1142
	1.95813	0.933166
1.02249	1.31811	1.44938
	1.31355	1.14074
1.11437	0.993908
1.22033		1.29264
	1.05584	1.54293
1.02841	1.41109	1.04411
1.15899		0.956683
0.992641	1.33792	0.879076
1.41157	1.36489	0.993213
1.25275	1.22039	1.5908
1.69826	1.12712
1.03938	1.40213	1.08441
1.42134	1.43608	1.70697
1.22553	1.61752	1.03664
0.995823	1.09044
1.00748	1.51654
1.20031	1.10903
1.34546	1.0883
1.17999	1.38064	1.27441
1.03677	1.32715
1.0642	1.23706	1.07844
1.09817	1.10588	1.21733
1.19247	1.3409	1.19691
1.30539	1.28871	0.997395
1.84153	1.66065
1.25011	1.52963	1.41181
1.57606	1.71659	1.06357
1.29765	1.9932
1.20236	0.837903	1.53452
1.10156	1.19496	1.57132
1.1579		0.985629
1.40159	1.19405	0.926134
1.33956	1.23541	1.16463
1.44757	1.47276	1.17518
1.29729	1.06166	0.904395
1.18994	1.089	1.21956
0.990278	1.40699	1.20476
1.27768	1.07583	1.29325
1.26045	1.43398	1.37827
1.32844	1.29257	0.964901
1.10683	1.18888	1.35484
1.08467	1.10193	0.965324
1.09911		1.0643
1.09636	1.20059	1.50159
1.08403	1.12184	1.25878
1.21422	1.34618	1.0258
1.93564	1.10879	1.04283
1.22271	1.29947	0.924971
1.35401	1.23684	1.12375
1.35398	1.53156	1.06872
0.99699	1.24301	1.19231
1.79071	1.03307	1.98127
1.34492	1.1477	1.03977
1.03872	1.06955	1.60104
1.0499	1.19251
1.00005	1.58472	1.33253
	1.32707	0.971093
1.58442	0.915478	1.46909
1.64258	1.51415	1.05328
	1.11712	1.14985
1.2093	1.2695	0.938732
	1.59237	1.13087
0.813701	1.29531	0.913277
1.02471	1.49917	0.98368
1.08204	1.15362	1.06999
1.20634	2.22845	1.24113
1.25135	1.6656	1.06139
1.16595	1.49417	1.17516
1.36738	1.03403	1.03906
1.09281	1.45951	1.24649
1.83457	1.1238	1.25833
1.01575	1.26047	1.02001
1.81726	1.39376	1.27395
0.878544	1.18801	0.875527
1.14899	1.05718	1.02086
1.33688		1.07775
		1.01671
	1.39364	1.08579
1.87672	1.1206	1.1068
1.02023	1.19919	1.20688
1.13839	1.0486	1.00319
0.948428	1.23775	0.940407
1.46008	1.27069
1.53409	1.39562	0.909073
1.14627	1.11908	1.12453
	1.27043	1.17332
0.981633	1.2241	1.0252
	1.46947	1.16595
1.0331	0.98055	0.890512
1.15649	1.32201	1.00495
1.42411	0.996242	0.902767
1.15996	1.27174	1.0901
1.13321	1.19233	1.23127
1.2383	1.68949	1.02816
1.24514	1.00905	0.866338
1.66809	1.30524
1.2318	1.47988	1.01696
1.25685	1.47456	1.01771
1.81982		1.6413
1.69021		1.2188
1.11106	1.20077	1.61919
1.53473	1.15908	1.02073
0.82934	1.19621	1.17986
1.22772	1.22492	1.05857
1.18323	1.2017	1.19066
1.42635	1.21539
2.08501	1.5445	0.91931
1.3919	1.03485	0.986837
0.968484	1.34927	0.948117
	0.815236	1.0623
1.18375	1.17582	1.05818
1.25679	1.03083
0.843929	1.08564	1.19588
1.39233
0.889788		1.16489
1.40686
1.27139	0.855407	1.22783
1.07473	0.898886	1.74428
1.14752	1.00509
1.36414	1.28493	1.19657
1.282	1.23308	1.25562
1.25851	1.44868	0.892194
1.27792	1.53003	1.41129
1.19504	1.16614	0.924328
1.31503	1.23677	0.970494
1.21669	1.15786
1.4893	1.78161	0.928095
1.0569		1.34606
1.24674	1.40324	1.1903
1.2814	1.30093
1.31821	1.4958	1.17226
1.24911	0.905153	1.08522
		1.29404
1.29072	1.4724	1.11989
1.09328	1.22663	0.965773
1.79645	1.36255	1.25767
1.26287	1.19063	1.25181
1.11714	0.84007	1.53469
1.82567	1.0634	1.24207
1.20163	1.16801	1.0762
1.361	1.18887	1.26389
	1.78249	1.18824
	1.25165
1.26772	0.906106	1.04144
1.20052	0.794618	1.13374
1.30726	1.12543	0.81471
1.20091	1.14906	1.01034
1.41955	1.10023
1.39605	1.0626	1.20327
1.04134		1.31398
1.24557	1.2174	1.04591
1.61476
1.09172		1.25218
1.18277	1.23988
1.16833	1.2875
1.87495	1.31465	1.15185
1.0692	1.42188	0.942697
1.44598	1.20343	1.33442
1.12223		0.967167
1.25383	1.16747
1.04316	1.38239	1.26649
0.993517	1.37062	1.40773
1.27528	1.67902	1.26077
1.22383	0.944921	0.859381
1.07119	1.17135
	1.27794	1.13889
1.06874	0.826501	1.12639
1.40007	0.972077	1.18473
1.37988	1.03895	0.972673
1.50385	1.13508	1.27184
	0.911076	1.12331
1.09602	0.995849	1.11907
1.31853	0.98948	1.06179
1.43603	1.40891	1.00295
1.31088	0.822027	1.04406
1.21459	1.16138	0.953963
1.79191	1.18166	1.20496
1.4247	0.956586	1.11111
		1.1868
1.21022	1.23743	0.907132
	0.90713	1.02288
0.867965	1.22284	1.50613
0.949483		0.897117
1.40649	1.00276	1.1376
1.61897	1.17089	0.943521
1.43497	1.18027	1.26755
1.42368		0.904491
1.43368	1.02207	1.34771
2.08139		1.26294
1.27477	1.61792	1.42935
0.819546		1.34649
0.963143		1.30462
0.852362	0.936484
1.2349	1.08997	1.08277
0.989438	1.05411	0.986918
1.4012		0.981219
1.68731	1.1031	1.03747
1.29344	1.29186	1.03204
1.00618		1.04455
1.12607	1.44451	1.15799
1.29197	1.01137	1.16646
1.71474		0.919813
		1.08658
2.08081		0.960144
1.06072
1.08999	1.32507	1.22204
1.07632	0.922525	0.859159
1.67913	1.08762	0.94171
1.42261	1.13482	1.1752
1.32028	1.20822	1.13174
0.882193	0.993134	0.982561
1.49053	1.66079	1.20223
1.11716	1.11998	1.02786
1.68991	1.51489
1.46205		1.13363
1.46984	0.999162	0.984642
1.3017	1.0639	1.17144
0.875152	1.89152	1.06728
1.32072		0.961051
2.15594	1.20016
	1.11935
		0.830755
1.00566	1.72422	0.931911
1.25538		1.23966
1.21379	1.15478	1.02332
1.43405	1.55597	0.929078
	1.0938
1.62166	0.941647
1.0947	1.23561	1.20905
1.51478	1.10954	1.14857
1.10224	1.14908	1.29536
1.30587	0.770679
1.3224	1.26427	1.16998
1.10386	0.991041	1.01466
0.938321	0.929856	1.17554
1.12726	0.914588	1.15829
1.53001	1.2587	1.6048
1.18953	1.08502	0.84375
1.3263	0.904684	2.01
1.13352	1.67756	1.01513
1.15165
1.24533	0.983627	1.23103
1.51998	1.15344
1.1479	1.34185	0.877959
1.1303	0.986498
1.22499	0.91875	0.863788
1.18497	1.23008	2.07737
1.29242	1.07239	1.22731
1.60066		1.08664
1.16904	0.842134	0.91957
1.36549	1.2469	1.557
1.03955	1.1392	1.17306
1.05568	1.04214	1.15293
1.08994	0.907467	1.01822
1.43218	1.60037	1.938
1.08639	1.16952	1.28257
1.30385		1.18401
1.14367	1.01442	0.976763
1.22652	1.20084
1.17282	1.10535	1.16425
0.816842	1.40243	1.03609
1.32766	1.13389
0.941448	1.07205	0.848696
	1.13106	1.36469
	1.0381	1.07286
1.33371	1.05557	1.40697
1.4611	1.21398
1.1533	1.43627	1.08698
1.05331	1.27583	1.27556
1.06502		1.17066
1.11764		1.31991
1.16527	1.16717	1.12209
1.10227		1.10985
1.08948		1.07626
1.61424	0.959926	0.792622
1.07675	0.886036
1.03232	1.18434	0.83673
1.13475	1.12806	0.962902
1.4522	1.02101	0.87951
1.63026	1.19892	1.24444
1.58695	1.16209	0.944773
1.623	1.1385	1.25931
0.889574		1.19748
0.815052	1.05268	0.903926
1.25296	0.964217	1.01402
1.50921	1.16767	1.23878
1.85244	1.10424	1.13407
0.994014	0.957145	1.01517
1.58878	1.18742	1.04581
1.29012	1.13651	1.47853
1.46325	1.38264	0.858896
	0.984621
0.805724	1.21017	1.05556
1.24066	1.03527	1.25642
1.07456	1.28082	1.31274
1.05728	0.814173	1.08113
1.63707	0.901804	1.1443
1.05907	1.31975	1.18078
1.41215	1.08618	0.910474
1.14257	1.06015	1.70036
1.11053	1.13543	1.06594
1.20263	0.925548	0.987196
1.51536	1.69302	1.13654
1.34697	0.823492	1.08433
1.04001	1.07887	1.01294
	0.763123	0.942069
	1.37987	0.97213
1.72559	0.856997	0.904172
0.999716	1.04025	1.10343
1.19769	1.08802	1.21467
0.955397	1.2009
1.10644	1.16082	0.913814
1.65051	1.15885	1.09829
1.04445	1.18491	1.25207
1.25004		1.13796
1.38057	1.0953	0.760488
2.23521		0.969825
1.39513	1.16235	1.10096
1.34516	1.42431	1.1173
1.59114	1.15485	1.29965
1.12254	0.974212	0.986033
	1.2136	1.18671
0.94218		1.07789
	1.19175	0.819281
1.40839	1.1373	1.68443
1.20842		0.890938
1.09853	1.10136	1.05976
0.865732	1.06947	1.25359
	1.15175	1.14434
0.986669		0.922134
1.08593	0.958512
1.63515	0.856677	0.869287
1.28649	0.956403
1.69322	0.827699	1.24568
		1.21063
1.51765	1.06181	1.10581
1.32753	0.967275	0.865362
0.943912		1.92033
1.40537		1.35416
1.23974	0.760379	1.06031
1.1416	1.31454	1.72594
1.1296	1.3449	1.99574
1.33661	0.916111	1.10377
1.04651		1.37163
0.943603		1.16093
1.35654	0.820974	1.13879
1.49249	1.11455
1.40528	1.06103	1.21791
1.6898	1.14847	1.0307
1.31577		1.01029
1.33671	0.847929	1.05622
1.25969	1.14242	0.912093
1.18977	0.949312	1.01499
1.05546	1.11553	0.897843
1.20763	1.08729	1.07811
	1.00397
1.42071	1.26086	1.88545
1.455	0.991227	0.949109
1.89707	1.21291	0.922959
1.40412		1.10619
1.33494	1.14526	1.09242
1.54637		1.15763
1.50868	0.897677	0.928838
1.35476	0.907531	1.21354
1.0425	1.44514
1.28224	1.03453	0.915581
1.39503	0.933588	1.06929
1.47756	0.9594	1.25797
0.926015	1.059	1.04076
	1.66544	1.01674
1.2874	1.24655	0.891283
1.15565	1.37906	1.14114
1.4082	1.15098
1.16112	0.911682
0.908561	1.23361	1.25406
	1.00754	1.3752
0.99797	1.12973	1.00396
1.11243	1.21172	0.963705
1.18289	1.18192	1.07381
1.14798	2.00815	1.10852
1.29379	1.10083	1.44113
1.13526	1.24917	0.841358
0.99456	1.15477	0.984422
0.948024	1.16381	1.12732
1.12816	1.51203	1.07326
0.932094	1.10647	1.05235
1.45475	1.17314
1.31789	1.02722	1.14277
1.16915	1.01473	1.08832
0.985784	1.10868	1.71618
2.11867	1.17142	1.19951
	1.1107	1.01063
0.963774	0.976823	0.99145
1.28662	1.23711	0.871788
0.913418	1.26372	1.13551
1.34193	1.00294	1.27686
1.45072	1.01106	1.30567
1.0609	1.10051	1.39967
0.895761	1.20558	0.962381
	1.29269	1.13161
1.01797	1.14515	1.01427
1.46086	0.95013	1.22576
1.49776	1.2473	1.36354
1.04819	1.44071	1.23953
1.23454	1.40906	1.73742
1.18985	1.21063
1.11727	1.07055	1.02658
1.34786	1.20654	1.016
	1.05366	1.10106
1.03831	1.51592	1.31052
1.03581	1.04393	1.33384
0.899431	1.19892	1.17167
1.16813	1.1834	1.32792
1.5337	1.30044	0.885038
1.70579	1.13172	1.15373
1.16265	0.927489	2.07343
1.22394	0.940735	1.01808
1.64764	1.11964	1.00149
0.962199		1.07535
		1.48715
0.887189		1.1975
2.24424	1.10671	0.986681
1.53881		0.91164
1.25518	0.881637	1.00763
1.22715	1.1456
1.19642	0.966254	1.0178
1.1804	0.919721	1.09596
1.21458	1.09744	1.02119
1.32692	1.22094	1.17901
1.23226	0.981624
0.926081	1.11955	1.27479
0.953185	1.02133	0.939418
2.26269	1.23287	0.924704
1.00904	1.14124	0.947584
1.05573	1.14227	1.31575
1.55947		0.981005
	1.33891	0.923034
0.9269	1.15159
1.06313	1.1364	1.4266
1.16644	1.70101	1.27917
1.29387	1.37212	0.904544
0.93613	1.56702	1.34453
1.10835	1.04273
1.09634	0.811325	1.22053
0.914389	0.93575	1.02847
	0.928353	1.30832
	0.967487	0.985135
	1.18353	1.22547
1.11699	0.962642	1.44025
1.12559	0.950548	0.95235
1.12811	1.77864	1.24443
1.13274	1.25227	0.985292
1.69476	1.05276
1.12086	1.06224	1.30211
	1.40532	1.31443
1.03717	0.91113
0.899768		0.951172
2.19256	1.20059	1.16586
1.02792	1.02205	1.05136
0.941559	0.867317	1.07317
1.12102	1.12104	1.06281
		1.14515
1.1256	1.41754	1.04707
1.21363	1.34017	1.20369
1.0558	1.08381	0.833629
1.12588	1.11153	1.05078
1.30957		1.21782
1.40199	1.08058	1.49674
2.13945	0.953968	0.947345
1.10273	1.02663	1.34771
1.30891		0.940293
1.15718	0.836245	1.21102
1.21502	1.17205	0.988
0.901405	1.03046
1.30961	1.09919	1.01579
1.08354	1.24422	1.05362
1.12928	1.28667	0.978063
1.25931	0.874425	1.23321
1.08961		1.32178
0.975144	1.20332	1.15225
1.32425	1.2285	1.11263
1.3049	0.999336	1.26518
1.78568	1.12951	1.3575
1.46864	1.25791	1.51972
1.00499	1.06545	1.07707
0.886861	1.10274	0.971587
1.30933	1.00301	0.990968
1.76935	0.96188	1.16911
0.968357	0.932544	0.842146
1.07375		1.0954
0.973987	1.22397	0.824971
1.12343	1.15062	1.2213
1.38831		1.05694
0.922095	0.928284	1.15208
1.09086	1.01973	1.16365
1.27324	1.03787	0.976558
1.2545	1.07962	1.27646
1.43159	1.45936	1.95144
1.21348	1.15019	1.39679
1.12837	1.21621
1.06511		0.80191
1.41795	1.10173	1.0321
1.0226	0.980214
1.29739	1.08889
1.15674		1.39956
1.0926	1.17781	0.843679
1.32304	0.999373	0.956365
1.01202	1.30959	0.972582
1.5143	1.21355	1.42448
0.932605		0.966834
1.42765	1.17079	1.10212
	0.865365	1.08508
1.16412	1.2324	1.24443
0.816465	1.06983	0.894601
1.77764	1.31337	1.06627
0.95396	1.10961	1.34567
1.02156	1.04951	0.803111
1.26552	0.990521	1.12859
1.25816	1.17153	1.24903
1.16524	0.926489	1.24512
	1.3492	1.15842
0.933079	1.95777	1.14302
	1.26866	1.1452
1.156	1.26913	1.14067
1.37047	1.20704	1.08489
1.13092	1.22899	1.12124
0.904655	1.22459	1.11498
1.1361	1.0284	1.95849
	1.41564	1.06597
0.934148
1.34893	1.01607	1.05446
1.01074	1.07945
	0.97426
1.27585	1.49672	0.839869
1.02402	1.11011	1.20013
0.843075		1.35867
1.81207		1.5446
1.03861	1.29661
1.376	1.12476	1.22656
0.999324	1.26188	1.13921
1.20398	1.28354	1.20995
1.10525	1.35828	1.25144
1.42121	1.19335	0.953332
1.48064	1.04821	1.08113
1.13558	0.887186	1.2496
0.916525	1.078	1.15743
1.32292	1.00647	0.908113
1.29272	1.29288	1.25199
1.26785	1.06804
1.31912	1.08532	0.742882
1.16371	1.10502
1.34579	1.36861	1.38022
	1.10014	1.04736
1.21216	1.11006	1.75326
1.27134	1.12228
1.23472		1.42573
0.950603		1.44977
	0.989308	1.04282
2.06853	1.07595	0.903488
1.23145	1.24955	1.01916
	1.05219	1.2144
1.22295	1.02993	0.837198
1.0352	1.01688	1.03587
1.45949	1.21657	1.15804
1.87187	1.01627
1.33169	1.23789	1.15324
1.23671	0.865157	1.14637
	1.11865	1.23007
1.83551	1.12364	1.42709
1.23316	1.22753	1.23571
1.04891	1.16886	1.33611
1.13593	1.16891	0.855343
1.26339	1.06978	1.32492
1.12285		0.895745
1.24227	1.26168	1.0789
0.999339	1.06625	1.10839
1.39388	1.59257	1.13141
1.25687	0.958711	1.0127
1.00265	1.06381	1.12868
1.54309		1.05636
1.53122	0.869707	0.804264
1.31364	1.25007	0.897702
1.24181	1.04881	0.893771
	1.03174	1.17611
1.24587	1.05819	1.39663
1.10457	1.16924	0.980845
0.859764	1.37976	0.896124
1.08409	1.28918	1.38331
0.851989	1.24976	1.23559
1.14423	1.22091	1.00538
1.06881	0.846666	1.06555
0.952146	0.905917	1.279
0.907135	0.954364	1.02127
0.86058	1.12225	1.26177
1.3841	1.05726	0.864581
1.29189	1.52267	1.2804
1.20662	1.24471	1.12131
	1.05058	1.00438
1.34583	1.07587	1.30344
	1.40295	1.13079
1.3876	1.30872	1.49164
1.33909	1.71271	1.02419
1.05027	1.10587	1.06641
2.18782	1.34834	0.806507
1.20947	1.63462
0.878406	1.04181	1.13201
0.940297	1.51577	1.13856
1.37459	1.18193	1.1538
	1.19735	1.21609
1.19933	1.12174	1.19145
1.14926	1.07597	1.15079
1.14052	1.41728
1.48557	1.14082	0.860404
1.04628	0.936127	1.21712
1.01299	1.05655	1.47042
1.04076	1.85004	1.17252
1.07682	1.04163
1.1522	0.975905	1.15072
1.56309	0.892024	1.05978
1.30104	1.07886	1.08415
1.17542	0.965089
1.22557	1.10199	1.21688
0.965688	0.980446	1.01865
1.13939	1.06787
	1.26068	1.28777
1.2601	1.23651	0.842844
1.46486	1.13016	1.18142
0.969354	1.12281	1.15907
1.83287	1.05119	0.873509
1.26593	1.11951	1.19301
0.980978		1.09271
1.15668	1.04757
1.20911	1.11378	1.00672
1.3796	0.989431	1.05052
	1.71963	1.123
1.05409	1.55306	1.19139
0.816356	1.11096	1.2043
1.20033	1.14239
1.38706	1.07508
1.08973	0.952038	0.967013
1.05941	1.26539
1.2233	1.99359	1.17933
1.26529	1.24112	1.08553
1.3231	1.76124	1.25518
1.02562	1.39403
[truncated: 164 more rows]

## Sheet: TFEB_ENDO 30min rapamycin resp
TFEB_ENDO; 30min rapamycin response
vehicle	2nM Rapamycin	20nM Rapamycin
	0.902232
1.02397	0.876865	0.803402
1.17099	0.917594	0.559136
	0.995192	0.617945
	0.918889	0.851826
0.840294	0.810724	0.786854
0.991867		0.718609
1.09952	0.768315	0.774478
0.944405	0.918206	0.547889
0.968885	0.763925	0.845661
0.913803	0.889747	0.818169
0.889997	0.908999	0.547529
0.87335	0.712346	0.571104
0.934132	0.81923	0.881731
0.823009	0.964529	0.884711
0.96977	0.87283	0.825839
	0.845294	0.696591
0.904362	1.00787	0.994572
	0.839814	0.752101
0.880439	1.05841	0.641626
0.906482	1.0425	0.732217
0.953826	0.946116	1.06293
0.878022	0.836019	0.892426
0.98783	0.892343	0.835676
0.802439	0.964814	0.680766
1.10294	0.814367
0.853374	1.12105	1.13747
0.717288	1.00619	0.644146
0.978011	0.928352	0.660864
0.872666		0.772474
0.94396	0.915305	0.597623
0.838075	0.980342	0.807688
0.888872	0.797345	0.678159
1.1046	0.884205	0.745693
1.01452	0.742507
1.12594	0.963986	0.905384
0.848565	0.939509
0.891282	0.907199	0.853383
0.915632	0.862043	1.001
0.772487	0.826494
1.13744	0.925606
1.09546	0.675486	0.639899
1.06998	0.759473
0.879973	0.949484
0.949833	1.02041	0.825693
	1.00163	0.804707
0.686745
	0.824952	0.795867
	0.921701	0.737903
0.787135	0.974419	0.777203
0.748566		0.584682
	1.00433	0.55658
0.821755	0.681728
0.90506	0.984997
0.783864	0.870402	1.13629
0.806522	0.956622
0.858575	0.696688	0.624399
1.23393		0.735522
0.660438	0.78748	0.710868
0.953493	0.78319	0.829386
1.04317	0.904052	0.614749
	0.9658	0.617829
0.900245	0.809213
0.772705	0.971033
0.696365	0.898286	0.617791
0.711842	0.941349	0.857597
0.87271		0.701609
0.956519	0.881255	0.790517
1.1969	0.931743	0.804081
0.923333	0.863169	0.788542
0.901292	0.791049	0.743602
0.842777	0.783927	0.533381
0.952933		0.825364
0.879111		0.598737
0.812482	0.761495	0.79884
1.03543	0.806106
0.959849	1.01061	0.744934
0.744667	0.865805	0.67118
0.834134	0.804947	0.569338
1.10228	0.922922	1.05422
0.763599	0.83189	0.672601
0.750437	1.13744	0.792578
	0.776371	0.517956
	0.811069	0.8116
0.929192	0.706531	0.885793
0.962153	0.785944	0.709659
0.702142	0.861798
1.01193	1.11294	0.684315
0.788264		0.778898
	0.775656	0.846811
0.859265		0.772969
1.04273	0.866413	0.653857
0.933701	1.10488	0.792697
0.908651	0.685626	0.650716
0.918459	0.834513	0.700056
0.961687		0.76481
0.792412	0.895148	0.632067
1.02101	1.16209	0.867549
0.705885	0.751488	0.590906
0.854142	0.787783	0.747786
0.969667	0.657831	0.717815
0.822314	0.728242	1.06034
1.02863	0.866106	0.584763
1.11778	0.715239	0.804009
0.837497	0.940827	0.907527
0.962829	0.970013	0.726493
1.0159	0.82784	0.554754
0.830743	0.833822
0.784421	0.699025	0.777524
0.761134		0.680098
0.993859	0.766512	0.852427
0.927538	0.876755	0.527939
1.01485	0.809297	0.670079
1.03386		0.701272
0.89178	0.919659	0.76659
1.03514		0.836094
1.05158	1.03688	0.777896
	0.900871	0.795677
0.839084	1.06536	0.646876
0.759057	0.816413	0.813746
	0.739924
0.993623	0.877234
0.802052		0.768321
1.07433	0.733051	0.843725
0.834869	0.819223	0.609694
0.791768	0.94224	0.642869
0.745953	0.928097
		0.629146
0.929044	0.822285	0.797837
0.690429	0.690142	0.723222
0.822277	0.919171	0.783703
0.917422	0.906137	0.785062
	0.875197	0.711109
0.814892		0.588865
0.829643	0.722873	0.710746
1.06025	0.970409	0.60464
0.869927		0.624846
0.817435	0.906128
0.736486	0.865206	0.6829
0.916055	0.724306	0.944494
0.919017	0.903271	0.5337
1.08327	0.786736	0.676076
		0.72878
0.786536	0.857646	0.908321
0.901759	1.04143	0.906815
0.911007	1.00141	0.756105
0.931592	1.14197
0.835242	0.818817	0.613685
0.974334	0.883793
0.80067	0.657058	0.652084
0.825998	0.784149	0.746705
1.00766	0.847859	0.754087
	0.824064	0.615168
0.731711	0.822083	0.731716
0.711362	0.758162
0.993253	1.17287	0.671864
	1.07959	0.711574
1.05769	0.65542	0.698339
0.840746	0.84771	0.771142
0.805559	0.816207	1.11479
	0.743626	0.986283
0.970428	0.943686	0.750495
0.934309	0.912941
0.909029		0.644388
1.01492	0.701894	0.877874
0.825574	0.957063	0.818589
0.678362	0.75574	0.901944
0.985356	0.906832	0.705371
0.884921	0.768158	0.823513
0.857511	1.11946	0.640396
1.12242	0.847088	0.835119
	0.867273	0.699723
1.01783	0.946531	0.55941
1.07711		0.765434
0.966375	0.900164	0.833723
1.28221	0.883225	0.66507
0.965931	1.04441	0.699277
0.857765		0.810116
	1.07315	0.783572
0.907507	0.680137
0.995752	0.884518	0.624141
1.14771	0.943891
0.939719	0.892397	0.581713
0.90295	0.912281	1.03987
0.747109		0.71488
0.853246	0.836143	0.833685
0.76293	0.84034	0.748763
1.11069	0.749552	0.61802
1.13737	1.04796	0.741764
0.940806	0.744266	0.689676
0.890546	1.00131	0.641389
0.939356	0.810701	0.799851
0.996814	0.751469
0.894737	0.873406	0.697125
1.00525	0.707724	0.851435
0.952364	0.768809	0.83352
0.859327	0.693579	0.742147
0.963105	0.932456	0.830336
1.106	0.988427	0.77559
1.26438	0.984234	0.525875
0.929131	0.839765	0.66076
0.89008	0.829828
1.06288	0.7805
0.867995	0.947018	0.557898
0.765721	0.670548	0.627883
0.828379	0.786279	0.526098
1.09215	0.941984	0.669442
0.919282	0.845992	0.703587
0.834021	0.885115	0.690356
0.806692	0.870288	0.641603
0.884674	0.855911
0.753716	0.95966	0.774623
0.854277	0.770091	0.822524
0.84739	1.04255	0.858242
0.860464		0.969819
0.927353	0.875208	0.62325
0.999679	0.939999	0.774259
0.710242	0.923862	1.01647
0.864924	0.727219
0.779542	0.884318	1.00015
	0.918849	0.686822
0.905805	0.992712	0.863129
0.948613	1.08175	0.912995
1.22351	0.941391	0.6773
0.878929	0.890139	0.620695
1.05227		0.520411
0.921957	0.764276	0.881296
	1.02954	0.931115
0.933178	0.858213	0.753841
0.993639	0.918306	0.770227
1.11142	0.808695	0.692028
0.897408	0.775316	0.578579
0.797097	0.948204	1.10429
0.817489	0.920805	0.825424
0.956588	0.877336	0.893106
0.921793	1.1077	0.806114
1.09479	0.839976	0.732151
0.874211	0.942574	0.659281
0.947633	0.950842	0.797732
1.16162		0.659057
0.946895	0.821427	0.698275
0.805559	0.878467	0.861873
0.687048	0.781309	0.593865
0.968885	0.79789	0.902768
0.92511	0.951581	0.805655
0.902109	0.891303
0.984789	0.84618	0.832199
0.893789	0.838735
1.01322	0.946571
0.814815	1.03659	0.832909
0.849019	0.913983	0.753999
0.951298	0.702504	0.738508
0.811196	0.932273	0.780534
0.970037	0.918664	0.727332
0.766304	1.00302	0.534217
0.818787
	0.99923
1.04648	0.738812	0.766865
0.853779	0.729485	0.969868
0.713744	0.891558	0.667846
1.00949	0.676901	0.836415
0.904901	0.998238	0.810055
0.894589	0.67097	0.639588
1.04084	1.11427	1.12809
0.711171	0.764093	0.820869
1.07261		0.852617
0.74607	0.904751	0.921098
0.85131	0.804944	0.835076
1.099	1.04385	0.784768
0.850197	0.778777	0.707309
0.74341	0.73329	1.04222
1.11654	0.827461	0.790822
1.16759	0.84167	0.576719
0.869291	0.744543	0.693533
0.878368	0.93267
0.76778	0.860657	0.780246
0.801751	0.909838
1.00979	0.882187	0.651816
1.10048	0.962974	0.73529
1.10923	0.669128	0.662368
0.911661	0.954046	0.774376
1.11869	1.08167	0.592066
0.753946	0.814454	0.972373
0.727269	1.023
0.919532	0.796487	0.945054
0.978728
0.992269		0.702434
1.0885		0.847472
0.814842	0.798124	0.791824
0.864736	0.691823	0.54517
0.944944	0.990336	0.910691
0.981177	0.911543	0.616516
0.943889	0.864181	0.859733
1.03029	0.926839	0.67779
0.790961		0.580606
0.880178	0.877151	0.766673
0.812981	1.10661
1.03825	0.813963	0.777923
0.879465	1.04827
1.03002	0.889982	0.554055
1.05301	0.885595	0.712093
0.820454	0.926241	0.975016
0.994736	0.838174
0.914518	0.850928	0.659333
0.882185	0.891932	0.847924
1.13677	0.81032	0.610459
0.73319	0.970034	0.712645
0.935938	1.04536	0.673196
1.05049	0.900066	0.889378
0.90249	0.835484	0.896525
0.913032	0.865639
0.974869	0.826549	0.789931
0.801531	0.85801	0.752243
0.995347	0.895603	0.69861
1.30713	0.912882	1.05344
0.999378	0.918669	0.728875
1.05631	0.964792	1.07363
1.22735		1.03037
0.954787	0.849619	0.801177
1.14421	0.844483	0.759679
0.980124
0.989801	0.824051	0.738306
0.834586	0.9169
0.937375	0.719698
0.890936	0.99905
0.986568	1.13681	0.519251
1.02436	1.02146	0.815354
0.961744	0.774166	0.856075
1.0327	0.824729	0.840815
0.799851	0.755024	0.738841
	1.0191	0.738322
0.950146	0.760175	0.947386
1.09245	1.01409	0.920245
0.828536	0.905681	0.698517
0.975022		0.790923
1.05528	0.904178	0.83473
0.740079
	0.917874	1.10131
0.821444	0.872976	0.602959
0.91019	0.938057	0.815454
1.07681	0.750229	0.832302
0.653948	0.725043	0.778309
1.28086
0.852076	0.942092	0.796592
0.842355	0.987512	0.666614
	0.976191
	0.879066	0.640297
0.938698	0.93195	0.781373
0.656884		0.960217
1.00821		0.705563
0.650195	0.85867	0.804474
0.912969	0.87879	0.944395
0.864516	0.827759	0.698243
0.923198	0.844528	1.04271
0.828053	0.870583	0.782835
0.852913	0.903711	0.789504
0.656366	0.719891	0.624745
1.07212	0.800785	0.723557
0.710748	0.967857	0.841582
0.866461		0.748074
1.00358		0.998277
0.692664	0.818153	0.912367
1.01	1.13664	0.70013
0.996294	0.757461	0.681832
1.24514	0.79213	0.582283
0.767199	1.07736	0.660198
1.02814	0.945785
0.840636		0.907579
0.787226	0.760993	0.738916
1.13054	1.04721	1.10303
1.1069		0.76865
0.973811	0.841697	0.908036
0.840033	0.783066	0.700748
0.831671	0.97233	0.828104
0.993592	1.08683	0.777889
0.947367	0.816515	0.631816
1.04542	0.819496	0.799536
0.797149	0.660713	0.937901
0.826201	1.10184	0.544639
1.02837	0.930576	0.76555
0.789693	0.90232	0.586054
	0.916996	0.6705
0.745924	0.676039	0.712484
0.684584	0.711348	0.969245
0.861338	0.898485	0.78582
0.657292	0.871733	0.602667
0.894093	0.667271	0.619943
0.899514	1.05674	0.671389
0.744752	0.919758	0.654462
0.970963	0.920455	0.80366
0.841978	0.828879	1.06517
0.817198		0.659544
0.898985	0.766026	0.99024
0.777001	0.7711	0.629837
0.815527	0.828749	0.689787
0.924429	0.762368	0.935189
	0.675533	0.680065
0.762472	0.920907	0.598425
1.12692		0.577845
0.664268		0.639449
0.997015	0.888344
0.90085	1.16145	0.772148
0.936508		0.709275
0.990348	0.858729	0.814514
1.02293	0.779793	0.625694
0.787086	1.10675	0.834485
	0.779658	0.697738
0.862151	0.781935	0.754642
0.687493	0.853643	0.605431
0.85384	1.18039	0.819268
0.806485	0.895546	0.712354
0.649028	0.800182
1.01509	0.802589
0.972191	0.834767	0.870807
0.696601	0.854579	0.74268
0.742581		0.679572
	0.733322	0.68453
0.643904	0.83208	0.912228
0.868985	0.826006	0.520757
0.907976	1.03868	0.647715
0.862391	0.821232	0.6919
0.830452	0.912284	0.7696
	0.733346	0.650989
1.11582	0.810963	0.870314
1.01584	0.938111
0.652062	0.755051	0.817516
1.07358	0.73872	0.791566
0.853367	0.957634	0.781231
0.870613	0.920858	0.682054
1.03859	0.897267
0.80878	0.883451	0.831812
0.99435	0.688229
0.685034	0.903418	1.02308
0.77763	0.779365	0.71071
0.64768	0.936983	0.686446
1.01633	1.0809	0.994942
0.909422	0.931526	0.581877
0.707461	0.939432
		0.808091
0.705198		0.822979
0.996357		0.858084
	0.888087	0.739313
1.1554	1.01133	0.875784
0.909786	0.812291	0.851124
1.14294	1.03458	0.937649
0.868657	0.822854	0.823612
0.903438	1.02209	0.638626
0.836495	1.05052
0.927381		0.732294
0.694304	0.777972	0.59313
0.909889	1.00327	0.649951
0.78745	0.757458	0.862806
0.990571	0.918763	0.692745
0.770881	0.789095	0.860781
	0.848301	0.873592
0.964903	0.903778	0.993902
	0.898161	0.712777
0.912185	0.904226	0.72237
1.1548	0.873662	0.923346
	0.911201	0.644801
0.911788	0.845242	0.694388
	0.915465	0.745348
0.819181	0.808906	0.688779
1.15612	0.806599	0.780468
0.765886		0.779367
0.775801	0.873684	0.857172
0.832415	0.703183	0.694514
0.694876	0.916356	0.575771
0.786618	0.859854	0.762631
0.912466	0.894276	0.783578
	1.05856	0.714336
0.989877	0.879937	0.81902
	0.830697	0.644443
1.29874	0.919086
0.854873	0.84391	0.712009
0.797644	0.921864	0.869395
0.82048	0.721349
0.909404	0.836377	0.691813
	1.15684	0.921637
0.714591		0.801985
0.878425	0.732834	0.680077
0.649041		0.756676
0.685608	0.977807	0.652765
0.916084		0.653546
	0.973799	0.674742
0.842503	1.04677	0.673713
0.981607	0.959494
	0.920113	0.531277
0.887966	1.07184	0.773253
	0.802993	0.662702
0.814303	1.03595	0.605156
0.80722		0.897696
0.779023	0.91201	0.762902
0.83612	0.801278	0.904826
1.06931	0.788384	0.680707
1.17793	0.757054	0.719116
0.724374	0.746925	0.545921
0.857006	0.885399	0.659109
1.01998	1.02686	0.755687
0.756267	0.955292	0.750737
0.944992		0.689573
0.790267	0.956184	0.737859
0.854118	0.854241
0.867208	0.996126	0.670938
	0.775059	0.708752
0.723329	0.936238
	0.80301	0.68508
0.794433	0.988203	0.780906
0.789797	0.743487	0.786162
0.893018	0.885711	0.884309
0.899664		0.700708
0.874252	0.808969
0.65575	0.864935	0.723665
1.05838	0.910533	0.758366
0.735978	0.845212	0.8162
1.03111		0.72893
1.07171	0.890713
	0.975973	0.776407
1.03442	1.0489	0.776902
0.872991	0.857312	1.09213
1.1173	0.981176	0.738975
0.79972		0.586897
0.762885	0.678217	0.858917
0.82477	0.88982	0.779239
0.751841	0.818009	1.07184
0.862186	0.697219	0.714479
0.800847	0.993709	0.815912
0.96187	0.742086	0.844834
0.865835	0.722972	0.711295
0.978666	0.922575	0.82561
0.790954	0.84835	0.519579
1.04296		0.81109
1.15046		0.565636
1.08872	1.02667	0.905396
0.904155	0.867211	0.763974
0.911026	0.806282	0.715472
0.84887	0.880837	0.848236
0.905262	0.80603	0.654997
0.941754	0.895608	0.848452
0.982964	0.769908	0.727071
1.06752		0.653262
0.838444	0.990729	0.704334
0.880717	0.952872	0.80818
0.84797		0.718934
0.786473	1.0286	0.818266
0.96622	0.73798	0.685267
0.767725	0.691362	0.719535
0.977854	0.787472	0.739691
0.846318	0.905237	0.963587
1.08641	0.76371	1.04904
	0.91462	0.80355
0.951495	0.982993
0.9775	0.960389	0.829396
0.764728		0.746152
0.87039	0.925048	0.783386
	0.908574	0.616028
1.31635	0.879891	0.780224
0.985772	1.11967	0.698235
0.968848	0.895486	0.704262
0.751871	0.903138	0.801031
0.799658	0.875844	0.703507
0.894541	0.863313	0.72188
1.03674	0.648986
	0.926427	0.856212
0.976093	0.984918	1.11946
0.86763	0.818897	0.693392
0.993867	0.790099	0.803349
		0.682607
0.968092		0.798536
0.904938	0.836578	0.842919
0.951782	0.828146	0.649019
0.810621	0.769714	0.535771
0.9742	0.788469	0.730521
0.671891	1.00062	0.648608
0.880655		0.751745
0.95746	0.845853	0.732589
1.02558		0.811198
0.85527	0.893513	0.748755
	0.754853	0.630799
0.730075	0.971241	0.816115
0.893719	0.966238	0.786788
0.980012		0.891049
1.00234	0.809292	0.779868
0.881668	1.03026	0.823128
0.753738	0.929064	0.677336
0.872096	0.684429	0.676443
	0.715372	0.787689
1.04444	0.68826	0.657562
0.867445		0.65882
0.939034	1.00081	0.730657
1.26915	1.02962	0.770581
0.760253	0.742674	0.79558
0.882712	0.913846	0.678635
1.01432	0.804261	0.659117
0.877977	0.755679	0.769115
1.0147	0.782709	0.847098
1.04728
0.890078	0.789236	0.635987
1.08129	0.940586	0.747763
0.960469	0.896465
0.865377	1.13393	0.795733
0.817939	0.934913	0.770966
1.1794	0.716439	0.706705
0.824817	0.813123	0.725721
0.854459	0.843788	0.599546
0.970522	1.00906	0.628163
	0.738778	0.806478
1.0819	0.901624	0.577996
0.765227	0.88589	0.525337
0.92083	0.85299	0.746661
0.923313	0.789013	0.693791
0.881103	0.772432	0.685043
	0.788471	0.675253
1.01114	0.948884	0.816605
	0.658713	0.6712
0.857842	0.885507	0.698501
0.867647	0.753836	0.840541
0.964908		0.832949
1.05789	1.02676
0.837901	0.875012	0.640519
0.890141	0.927682	0.816202
1.04979	1.11496	0.714277
0.861398
0.986975	0.735232	0.877173
0.847071	1.07658	0.824938
0.945178	0.764961
0.925545		0.845576
0.920894	0.95065	0.819513
0.907146		0.801036
0.917936	0.67033	0.591533
0.987793	0.678453	0.709559
0.933805	0.857093	0.699928
0.878019	1.02822	0.725618
0.909707	0.894126	0.969811
1.08125	0.789439	0.822169
1.10708	0.733422	0.834434
	0.865064	0.641307
1.00205	1.1129	0.754622
0.883941		0.868229
0.788354	0.697511	0.710954
1.04445	0.877071
0.944892	0.771381
1.10059	0.835456	0.598814
1.04817	1.15451	0.572132
0.996931	0.956775
1.0444	0.969797	0.607799
1.09283	0.775658	0.715652
0.781682	0.865464	0.732656
1.11181	0.828139	0.622509
0.948617	0.923573	0.687744
0.819808	0.897807	0.702301
1.0408		0.730189
0.991719	1.07683	0.746571
0.757819		0.698749
1.04294	0.937957	0.547771
0.796624	0.818238	0.708508
1.23033		0.776076
0.933055	1.00117	0.980669
	0.799682	0.671657
1.04922	0.766864	0.737617
0.837203	0.809487	0.716232
0.747401	0.805377	0.839082
0.754603	0.951204	0.739215
0.820663	0.772193	0.72179
0.904755	0.886285
0.986027	0.798292	0.584044
0.922239	0.957376
0.876166		0.777659
0.903626		0.802131
0.931183	0.790266	0.66228
0.961564	0.861762	0.654077
0.933809	0.881198	0.592103
1.01866	0.753189	0.856286
1.18355	0.660823	0.853102
1.06048	0.752657	0.639835
0.872689	0.854809
0.891793	0.920397	0.87623
0.906952	0.903888	0.728105
1.20211	0.78047
0.850157	0.85919	0.746312
	0.733916	0.662915
0.980548	0.799312	1.02691
0.908256	0.874576	0.847864
0.712109	0.861122	1.06794
0.839175	0.817246	0.770235
0.8492	0.971238	0.944254
		0.708366
1.02542	0.776275	0.734736
1.13009	1.0102	0.749025
	0.781637	0.801541
0.734429	0.676099	0.578482
0.964253	0.803304	0.88171
0.89752	0.844401	0.767104
	0.756366	0.756874
0.969188	0.725511	0.754669
0.929791	0.835332	0.778131
0.951144	1.1254	0.661927
1.07905	0.739865	0.959005
0.844233	0.819005	0.720299
0.726266		0.792296
0.807068	1.04294	0.79631
1.28045	0.958032	0.721381
0.911171	0.906842	0.759031
0.777607	0.905491	0.778176
0.71426	0.966331	0.767859
0.88281	0.875266	1.07725
0.698354	1.04914	0.659162
0.911447	0.849416	0.802317
0.841491	0.798537	1.02237
0.844667	0.939171	0.950637
	0.804094	0.674247
1.02209	0.925353	0.749113
1.01105	0.871961	0.9637
	0.757369	0.823401
0.868959	0.875032	0.905876
0.982644	0.822206	0.780241
0.866153		1.01378
1.04375
	0.910354	0.870802
0.855442		0.98914
	0.888268	1.06473
0.763033	0.872197	0.924982
0.775617	0.882007	0.643422
	0.79017	0.982243
0.935503	0.908261	0.998748
0.887568	0.811312	0.791739
	0.730862	0.566366
0.871884	0.7092	0.817273
0.956632	0.929281	0.856031
0.712094	0.827737	0.839826
1.00073	0.844869	0.742812
0.929222	0.812244	0.817873
0.899733	0.71146
0.900367	0.874493	0.894382
0.986999	0.922408
0.797289	0.691788	0.747677
	0.831511	0.913337
0.76145	0.801259	0.796878
0.851426	0.980925	0.571722
0.873303		0.698316
0.805242	0.860582	0.668338
0.792289	1.01935	0.792499
0.947306	0.925433
0.901422	0.792203	0.922002
0.907925	0.957113
0.814015	0.828672	0.860668
0.727506	0.870863	0.799869
0.807227		1.03276
0.776954	0.917972	1.06336
0.80955	1.10895	0.837934
0.758801	0.829663	0.644322
1.14139	0.975133
0.857545	0.900406	0.894198
0.788041	0.838564	0.758947
0.868024	0.747375	0.811421
0.852849	0.980221	0.907383
0.759126	0.851994	0.967032
	0.705155	0.613394
0.882022		0.80846
0.871764	0.791198	1.07007
0.713406	0.764306	0.826726
0.957375	0.741155	1.17162
0.828897	0.880695	0.811358
1.20472	0.755971	0.814896
0.832655	0.825148	0.947141
1.14124	0.682429	0.669401
	1.03708	0.81504
0.819053	1.00944	0.780045
0.798019	0.891194	0.764058
0.901214	0.945462	0.92968
0.825853	0.868909	0.860048
0.80439	0.877446	1.16168
0.823321	0.79418	0.944063
0.912111	0.794183	0.682575
0.852326	0.847475	0.816504
0.863043
0.67918	0.740798	0.72982
0.830914		0.860929
0.93333	0.889409	0.875839
	0.916121	0.658009
0.848899
0.724246	0.936231	0.807962
0.754042	0.794488	0.893096
0.855939	1.20756	0.759208
0.767483	0.994918	0.56552
		0.955139
0.891576		0.872044
1.05505	0.722015	0.839906
0.945095	0.867729	0.797738
0.971844		0.845696
1.04588	0.734123	0.820882
0.740591	0.737094	0.752278
0.844815	0.954755
1.07857	1.13936	0.690003
0.841755	1.23574	0.674254
0.901874	0.881527	0.675714
	0.817231	0.758619
0.694681	0.723287	0.872153
0.74674	0.802919	0.884094
0.726435	0.912369	0.747615
1.06473	0.827573	0.895706
1.13232	0.99911
	0.907723	1.0381
0.907835	0.956019	0.858504
0.991526	0.836045	1.08094
0.861644	0.840063	0.719373
	0.891577	0.838465
	0.836687	0.684107
	1.10613	0.896101
0.86999	1.0242	0.820423
0.761445	0.786771	0.841975
0.868367	0.811107
0.992969	0.720671	0.773917
0.892256	0.697363	0.573895
0.963591	0.710026	0.957448
0.813513	0.868044	0.7981
0.873416	0.751492
	0.744446	0.827147
0.958432	0.868756	0.767711
0.849239	0.657483	0.854683
0.986597	0.780084	1.09507
0.785633	1.00562	0.948765
	0.834449	0.767138
0.747445	1.16219	0.84598
0.738106	0.826874	0.731332
0.770108	0.958435	0.755506
0.757971		0.6128
0.943045	0.79431	0.956277
0.897471	1.10753	0.850138
0.764365	0.980532	0.850661
1.00466	0.70692	0.580813
0.894839	0.745584
0.74996	1.04816	0.715721
0.928508	0.757927
0.875155	0.927277	0.665111
	0.755425	0.769793
0.769446	0.872958	0.843615
0.90051	0.973674	0.664653
0.820828	1.04993	0.888788
0.964979	0.828728	0.850185
0.849717	0.725194	0.574054
1.13562	0.82048	0.735453
1.13771	0.830146	0.723404
0.720335	0.943862
0.979277		0.615166
1.07637	0.80147	0.674172
1.14464	0.902285	0.849949
1.1525	0.776245	0.633878
0.858292	0.746574	0.800344
0.88113	1.00911	0.644114
1.04861	0.748543	0.755025
0.824198	0.947197	0.678497
0.883691	0.793288
0.753499	0.87319	0.707377
0.816163	0.778996	0.8263
0.761256	1.04476	0.808261
0.832349	0.831459	0.934447
1.12403		0.836008
0.818472	0.892613	0.739607
1.02465	0.792667	0.972214
0.752282	1.12786	0.82926
0.946863	0.929989	1.10555
0.868386	0.798279	0.794629
0.87439		0.826561
0.935541	0.661583
1.2289
0.842915	0.963188	0.74582
0.754319	0.777968
1.02003	0.866069	0.874356
1.08614	0.832914
0.978282	0.89047	0.701561
1.20803	0.941009	0.744954
0.714418	0.793754	0.748504
0.772476	0.815646	0.678794
0.982331	0.960116	0.741907
	0.932258
1.05841	0.868088	0.711913
0.796713	0.804417	0.843292
1.14922	0.849275	1.08423
0.846051	0.764987
0.876381	0.937983	0.835059
	0.852453	0.735402
0.87665	0.806581	0.807131
0.850541	1.0342	0.70383
0.804966	0.777106	0.766747
0.736219	0.932362
0.715203	0.8613
1.01066	0.80822	0.751354
0.735216		0.865382
	0.800763	0.894659
1.16722	0.746735	0.621997
0.954248		0.709301
0.990172	1.10101	0.665296
		0.702467
	1.02979	0.731709
0.879306	0.913202	0.718741
0.907588	0.900542	0.827985
0.952255		0.703268
0.869474	0.988331	0.758408
1.12146	0.935852
1.00601
1.20724	1.07512
	1.09387	0.697073
0.939087	0.760014	0.900518
1.05324	0.911427	0.711047
0.861578	0.695073	0.836567
0.823237	0.806921	0.888735
1.0645		0.839536
0.938483		0.841912
0.907139	1.02395	0.885303
0.713689	0.776857	0.841922
0.893546	0.671552	0.68778
0.899918	0.875898	1.04537
	0.847714	1.14554
0.915648	0.738314
1.10455	1.00882	0.651725
0.789193	0.803791	0.846456
0.909087	0.984935	0.72924
1.04073
1.13086	1.06769	0.711807
0.850373	0.770846	0.740958
0.917509	0.942456	0.735265
0.853278	0.669148	0.733657
0.976174
0.876239	0.948117	1.05929
0.988844	0.836772	0.777845
0.76231	0.920724
0.820736	0.898263	0.813486
0.895606	0.916556	0.629917
0.809415	0.936726	0.799367
0.875541	0.936685	0.728792
0.846066	1.14693	0.703431
	0.940749	0.824471
0.967782	0.801146	0.770727
0.978652	0.8817
0.909723	0.869825	0.731825
0.770177	0.787322	0.747298
0.939384	0.875732	0.803928
0.983845		0.820932
1.07428	0.834747	0.797421
0.912908		0.692041
0.854528	0.867576	0.801657
1.04971	0.969224
	0.83277	0.914967
0.96374		1.05758
	0.965576	0.897059
0.911858	0.741438	0.95736
0.831141	0.759708	0.904735
1.01208	0.880943	0.721755
0.893243	0.65723	0.836315
0.823022	0.804326
0.811117	1.01968	0.84513
0.808515	1.09947	0.789804
0.982485	0.851192
0.955651	0.7931	0.620006
0.752244	0.74644	0.787022
0.90731	0.994067	0.754215
0.783178	0.75852	0.993773
1.04796		0.742195
0.912202	0.969328	0.638844
0.959572	0.840477	0.822612
0.852013	0.892047
0.814142	0.923734	0.800416
1.07641	0.7021	0.781298
0.902437	0.814532	0.679649
0.968895	0.933105	0.621455
0.866018	0.891576	0.823898
0.87725	0.871625	0.615379
		0.750662
1.00874		0.837843
0.914859	0.678665	0.736006
0.860423	0.770309	0.733158
0.715007	0.810947	0.755046
0.828794		0.737525
	0.986132	0.747999
0.938644	0.961359	1.04103
0.807155	0.979481	0.859182
0.950968	0.781838	0.706326
0.951681	0.852535	0.662932
0.71412	1.00601	0.719523
0.898677	0.907934	0.704136
0.828713	0.866877	0.68368
0.785378	0.820375	0.697085
0.926921	0.798054	0.788367
	0.874862	0.719972
	0.830993	0.878994
	0.979634	0.79962
0.911767	0.966639	0.719225
0.963017	0.884424	0.653446
1.02444	0.917388	0.801596
0.870339	0.810625	0.856698
0.987735	0.811132	0.700509
1.07566	0.873955	0.756356
0.965167	0.961182	0.8055
1.09197	0.96946	0.764607
0.823576	0.706904	0.834723
1.00931	0.803215	0.822175
0.922	0.818389	0.746281
0.882609	0.832895	0.795271
0.878208	1.16928	0.730823
0.816823	0.883578
0.946173	0.908562	0.812264
1.00176	1.06144	0.916192
1.01944	1.07299	0.848107
0.903777	0.792016
0.899782	0.920949	0.693931
	0.810696	0.748841
0.779041	0.739199	0.773134
0.849478	1.03702	0.917402
1.1026	0.957487
1.02407	0.974312	0.786563
1.17582	1.15591	0.826679
	0.930681	0.951726
0.782242	0.864722	0.677029
0.954161		0.775301
0.994344	0.788348	0.806135
	0.90066	0.662132
0.818086	0.837624	0.829049
	0.773529	0.689819
0.73212	0.915563	0.945899
0.990931	0.956634	0.801279
		0.751087
		0.912931
1.00215	0.79889	1.09193
1.12565	0.864251
1.07829	0.745119	0.802646
0.97697	0.85698	0.662738
0.866213		0.835828
0.806208	0.799842	0.830731
0.869057	1.02294
0.891311	0.83559	0.852694
	1.15277	0.607745
0.825878	0.808103
0.857171	0.759543	0.868112
1.05488	1.07175	0.852465
	0.868841	0.745577
0.96893	0.889085
0.893999	0.72974	0.841895
0.724458	0.867668	0.742392
	0.872407	0.921585
1.03707	0.764717	0.592278
0.737503	0.932796	0.741658
0.762798	0.783813	0.734293
0.816042	0.821168	0.816864
	0.899495
0.935768		1.1629
	0.73629	0.759279
1.11243	1.15243	0.745532
0.965243	1.07952
1.03477	0.893225	0.645627
1.17375		1.04932
1.14236	0.912145	0.660877
0.731748	0.828576	0.754539
0.776112	1.01184	0.794935
0.95471		0.878606
0.949991	0.965805	0.766189
1.19656	1.2181	0.733384
0.746326	0.708942	0.710014
0.975515	0.87118	0.600935
0.995936	0.708221
0.959259	0.90798	0.744437
0.82715	0.980201	0.704818
0.959489	0.916097	0.705818
0.956559		0.84996
0.808251	0.895942	0.626236
1.15355	0.863894	0.899833
0.929257	0.926469	0.827145
0.723182	0.843876	0.872538
0.840635		1.05426
0.837282	0.723406	0.925471
0.981		0.635677
0.919373	0.971621
0.835145	1.03009	0.87251
0.82706	0.879443	0.66702
1.04605	0.934505	0.604067
0.844789	0.971518	0.883006
0.926671	0.839819	1.06552
0.848462	0.815073	0.649598
0.749252		0.880354
1.04279	0.823596	0.78284
0.803911	0.897288	0.746651
	0.915221	0.849862
1.17299		0.904143
0.756295	0.912231	0.761881
0.883004	0.864846	0.795011
0.873839	0.815786	0.716496
0.968459	0.861748	0.756521
0.785337	0.837137	0.93415
	0.729269	0.673523
0.787174	0.996777	0.8725
0.769593	0.849811	0.714468
0.892624	1.10065	0.719532
0.837175
0.939781	0.985228	1.0795
	0.968518	0.720611
0.908468	0.963468
0.88378	1.03948	0.925967
0.815235	0.679034	0.737067
0.86154	0.886376
1.0443	0.907008	0.739219
0.881961	0.759283	0.946249
	0.81783	0.654453
1.03761		0.687516
0.838629	0.827095	0.892612
0.911422	0.972204	0.693022
1.03498	0.85562
0.846654	0.985935
	0.753934
0.999633	0.820524	1.05458
0.959088	1.0467	0.721924
0.860753	0.695507	0.736643
0.852996	0.94005	0.962863
0.811297	0.801181	0.721164
1.15883	0.985978
1.0143	0.74492	1.02395
	0.944677
0.855874	0.947009	1.00516
0.859312	0.82628	0.9727
1.05959	0.889962	0.648278
0.777868	0.80672	0.684363
	0.842605	0.640771
1.01344		0.662913
0.833425	0.838932	0.740876
0.875814	0.890858
0.951351	0.871651	0.630675
0.941375	0.900278	0.774427
0.839186		0.770713
	0.918977	0.806857
0.99372	0.875006	0.70868
0.904676	0.878132
1.16237	0.889862	0.996127
0.976038		0.878631
1.03803		0.876365
	0.876079	0.751222
0.994268	0.932041	0.920276
0.906494	0.853402
1.18802	0.810614	0.907463
0.942734	0.860374	0.809245
		1.12843
0.743729	1.12931	0.856125
0.713392	1.01067	0.825114
1.0706	0.764798	0.910418
0.89603	0.750781	0.709873
0.867772	0.852022
0.824464	0.941815	0.761399
0.8333	0.982641	0.856716
1.03319	0.740615
0.81863	0.962465	0.648015
	0.838766	0.808477
0.813631	0.925382
1.07245	0.920878
1.05683	0.849279	0.8118
0.724318	0.856043	0.780302
1.08935	0.955888	0.683299
0.824809	0.851753	0.711376
1.08679	0.869841
1.06718	0.811958	0.997702
0.979676	0.971138	0.961327
0.924539	0.860989	0.889298
	1.01838	0.894242
0.821402	0.919109	0.728174
1.00422
0.858132	0.879899
0.981536	1.03056	0.900335
1.01766	0.806103
0.981439	0.819244	0.939398
1.09344	0.834823	0.988267
0.913246	1.00961	1.12109
1.2289	0.850522	0.972708
0.828436	0.901408	1.03153
0.941713
0.884696	0.971082	1.12666
	0.957366
0.952024	0.863194	0.700996
0.78667	0.938935	0.852344
0.858046	1.03916	0.732947
0.985522	0.774815
0.829052	0.889499	0.868282
1.0012	0.889851	0.792506
0.905315	0.825976	0.885662
0.910684	0.718496	0.797172
0.904956	0.862571	0.838148
	1.04579	0.782745
0.885375	0.899255	0.680067
0.974785	0.896816	0.766481
1.0271	0.960511	0.673004
	0.935767	0.583824
0.711701	0.8363	1.00663
0.795552	0.953982	0.869898
	0.832089	0.581947
1.08826	0.75717	0.77507
0.89461	0.904143	0.76529
1.04317	0.793775	0.829399
1.001	0.916368	0.72448
0.846385	0.802169	0.913329
0.83214	0.722176	0.877193
0.893068	0.834259	0.709115
0.935152	0.896042	0.586365
0.963411	0.843391
0.85795		0.760761
0.949504	0.879047	0.920105
0.893036		1.00789
0.820771		0.661662
0.810142	0.795099	1.09057
0.753477	1.01637	1.0175
0.834956	1.18648	0.701886
1.164	0.878386	0.652787
0.851967		0.750135
0.942238	0.788702	0.990507
	1.13384	0.693835
0.885097	1.04197	0.791469
0.921621	0.904898	0.778806
0.932159	1.07772
0.911211	1.06541	0.98478
	0.746233	0.726739
0.946033	0.87166
1.01212	0.847759	1.04256
0.943302	0.922331	0.841675
0.939905	0.87736	0.901147
1.06648	0.884264	0.871358
1.11818	0.772527	0.765783
0.977857	1.10854
0.872993	0.970814	0.903618
1.14357	0.837643	0.844467
0.934429	0.891407	0.705242
0.892841	1.07276	0.795087
0.873116	1.13088
0.831417	0.913385	0.657409
0.881496	0.800107	0.713616
0.718906	0.895687	0.681648
0.84518	0.985478	0.71729
1.02917	0.930457	0.983501
0.701748	0.842608	0.654825
0.928931		0.943423
0.879979		0.752724
0.808992	0.799608	0.809935
1.00723	0.99543
0.887856		0.768987
0.946413	0.967698	0.777303
0.886849	0.847214	0.659912
0.958858	0.829783	0.749472
1.00608	0.733784	0.762841
0.757596	0.775493	0.583817
0.912523	0.842417	0.819482
0.889849	0.824615	0.834097
0.98927	0.698653	0.862134
0.73653	0.88266	0.766956
0.890395	0.792825	0.874945
1.08596	1.03616	0.725655
0.93131	0.802349
0.938533	1.01015	0.828307
0.798026	0.893948	0.811802
0.901245	0.818634	0.832727
	0.818105	0.82236
1.00575	0.737258
0.772302	0.847911	1.06421
0.715731		0.73591
0.803014	0.867653	0.802361
0.888769		0.89346
0.861664	0.838051	0.697674
0.892432	0.690595	0.794272
0.825111	0.85064	0.687493
0.852541	0.747765	0.861909
1.06858	0.860967	1.0288
1.00046	0.779435	0.799157
0.784488	0.904197	1.0595
0.900901	0.939033	0.845057
0.845152		0.778764
	0.916493	0.805801
0.883382	0.988284	0.762598
0.905305	0.748105	0.829887
0.699173	0.930822	0.615988
0.959962		0.850356
0.823101	0.957738	0.693747
1.00142	0.917856	0.649204
0.948884	0.978679	0.680341
1.09101	1.10279	0.776479
1.0002	0.78626	0.947133
0.860028	0.716982	0.822778
1.00996	0.856784	0.81795
	0.988682	0.927642
0.92456		0.617781
0.840095	0.867713	0.72286
1.06688	0.97676	0.741281
0.93967	0.947902	0.78577
	0.932204	0.982124
0.982032	0.828305	0.956822
0.988205	0.994635	0.741039
0.965073	1.12234	0.836117
0.901173		0.70125
1.13185		0.732828
0.8947	0.971956	1.00977
0.759069	0.999974
0.907702	0.899167	0.838224
0.899319	0.931852	0.72394
0.789275	1.00776	0.763646
	1.05776	0.81453
0.827255	1.0671	0.950238
0.836247		0.602027
0.803667	0.88364
1.10187	0.768914	0.749541
1.06404		0.695153
0.968426	0.991721	0.693476
1.01543	1.03491	0.854881
0.950222	0.943614	0.734859
0.891852	0.912165	0.705598
0.876987	0.946587	0.639029
0.970914	0.897417	0.910724
0.905342	0.965114	0.711431
0.890436	0.82102	0.738059
0.939389	1.14584	0.935216
0.754395	1.0163	0.90333
0.767454		0.869365
	0.915736	0.887979
0.959786	0.907292
1.10075	0.987806	1.02811
1.01248	1.06019	0.849813
1.04324	0.878077	1.03711
0.902267	0.812115	1.05072
0.832325	0.671823	0.769367
0.85016	0.861898	0.624804
1.1189	0.983091	0.689095
0.850622	1.1478	0.791787
0.938847	0.95549	0.760505
0.791125	0.813324	0.723831
0.861702	0.731237	0.75134
0.791309	0.874187
1.00624	1.11167	0.918797
0.837644	0.884529	0.684606
0.924371		0.595978
0.994572	0.808626	0.727443
	0.86865	0.716588
0.745554	0.680297	0.839823
0.843807		0.657475
0.937144	0.729645	1.17655
0.857437	0.894185	0.709062
	0.746563	0.66011
0.728107	0.924931	0.906546
1.05398	0.706269	0.644235
0.940862	0.754399	0.683565
0.987495	0.934182	0.784668
0.953897	1.05039	0.727382
	0.970228	0.96373
0.950948	0.79858	0.854622
	0.653057	0.726279
0.861994	0.820821	0.665356
0.869767	0.963374	0.944622
0.810084	0.74457	0.785784
0.907071	0.815807	0.701753
0.93416	0.814994	0.823487
1.22463		0.668001
1.17122	0.836256	0.719543
	1.08684	0.677199
0.88919	0.982234	0.803834
	0.864689	0.775709
0.837995	0.800745
0.952737		1.12948
	0.920742	0.792765
0.789125	1.02611	0.716119
0.860122		0.722463
0.891129	0.946819	0.62485
0.882323	0.929024	0.813179
0.888112	0.926482	0.819812
0.77073	0.908196
0.808834	1.08656	0.863999
0.971405	1.04758	0.740679
0.875564	0.858689	0.859964
0.771292	0.75965
1.08903	0.911422
0.921921	0.786743
0.905346	0.99179
0.837933	1.10681	0.971406
0.902143	1.04302
0.854411	1.00059	0.712891
0.991022	0.833523	0.931647
0.88135	0.900648	0.780878
0.823653	0.94177	0.626287
1.08753	1.05197
0.937889	1.1381	1.11852
0.841012	0.801627	0.923829
0.780573	1.00476
0.909364	0.923147	0.78346
0.83867	0.875343	1.13563
0.974426		0.902896
1.04302	1.11917	0.970684
1.06893	0.847872	0.809701
0.8799	0.898464	0.819609
0.958584	0.751724	0.690647
0.717221	0.755952	0.761415
1.01707	0.978182	0.776032
0.900732	0.805301	1.02485
0.943229	0.865451	0.791268
1.18749	1.00095	0.748685
0.777989	0.99091	0.832049
0.875971	0.915024	0.919407
0.930436		0.886867
0.948228	0.764475	1.02108
0.957625	0.872318	0.861521
0.929391	0.84246	0.811911
1.1816	0.795496	0.814973
0.818073	0.934866	0.738157
1.1129	0.951927	0.899814
0.852684	0.982837	0.659292
0.956423	0.891592	0.727432
1.10432	1.02744	0.765861
0.805363	1.14786	0.837149
0.903562	0.722122	0.775864
0.940066	0.866835
0.807681	0.980325	0.766535
	0.848003	0.698294
0.758946	0.737806	0.877424
0.972265	0.923034	0.871992
	1.11048	0.850403
0.962448	1.02119	0.702765
	1.05034	1.06325
1.08207	0.841415	0.631474
0.797591	0.802661	0.714135
0.906307	0.773083	1.13533
0.785608	0.973907	0.694143
0.946888	0.96874	0.761308
0.920902	1.03216	0.710054
0.93797	0.733234	0.733947
0.776917	0.879051	0.643806
1.23773	1.04438	0.74615
0.921142	0.747831	0.874367
0.948541	0.759691	0.817599
0.824573	0.83119	0.782639
1.0259	0.941898	0.772844
0.955731		0.671479
		0.979196
	0.857718	0.970324
0.928172	0.866338	0.793289
0.830101	0.966391	0.707211
1.01067	0.983747	0.715138
0.772433	0.930547	0.733897
1.01427	0.900561
0.964383	0.908275	0.648555
1.04918	0.864477	0.823929
	1.22263	0.740569
0.943328	0.985242	0.585934
	1.08747	0.78024
0.950867	0.787835	0.767836
0.871554	1.03445	0.7011
1.01711	0.813561	0.854523
0.977577	0.89763	0.855927
0.816912	0.779438	0.712555
0.986015	0.999744	0.648763
0.932242	0.750112	1.1116
0.97624	0.897833
0.91549	0.877184	0.692454
0.964188	0.997291	0.696602
0.902129		0.847516
0.991864		0.988228
0.829305	0.885241	0.873798
0.880395	0.988568	0.668564
0.830014	0.978749	0.751844
1.04184	0.91037	0.736577
0.859563	1.12248	0.792231
1.00005	0.859259
1.11768	0.976637	0.901631
0.944154	0.755955	0.687355
0.821175	0.944478	0.538743
	0.756995	0.671836
0.898098	0.822809	0.642707
0.896514	0.699382
1.05939	0.858095	0.742856
0.820687
0.926262		0.793566
1.04993
0.743769	0.708967	0.724507
0.886125	0.803628	0.976862
0.885771	0.752703
0.896371	0.838655	0.772573
0.971346	1.15138	0.802309
0.860966	0.971745	0.627127
1.00249	0.939452	0.915345
0.943604	0.927253	0.835444
0.797737	0.941343	0.565544
0.941181	0.929791
1.04154	1.22872	0.753986
1.0449		0.872636
0.85003	0.923599	0.584534
0.918982	0.873619
0.864599	0.831001	0.768571
0.968859	0.796132	0.623232
		0.85208
1.00376	0.992201	0.697362
0.850184	1.09783	0.734064
0.970254	1.13351	0.888033
0.897217	0.98749	0.843891
1.0163	0.701745	0.786699
1.00735	0.905468	0.721207
0.982306	0.93138	0.698612
0.954503	0.674869	0.817772
	0.839034	0.691825
	0.917919
1.02383	0.611252	0.750255
0.865147	0.787523	0.705764
0.909397	1.08309	0.746972
0.92634	0.875569	0.610005
1.02733	0.949351
0.916873	0.728696	0.77201
1.09067		0.794039
0.907861	0.842276	0.797242
0.851842
1.16626		0.822138
0.91385	0.905166
0.917461	0.965708
0.93347	0.978734	0.693142
0.775434	0.991614	0.597635
0.9411	0.862386	0.874876
0.893149		0.694038
0.839554	0.870668
0.912247	0.966225	0.778069
0.735363	1.17929	0.912878
0.914	0.771541	0.883734
1.04197	0.922354	0.628734
1.15147	0.68464
	0.773969	0.720826
0.749209	0.672121	0.712046
1.13615	0.665881	0.70727
1.05735	0.823837	0.571445
1.03052	0.968725	0.854712
	0.647861	0.804926
0.802682	0.778945	0.741514
1.0067	0.748386	0.814038
0.947821	0.997451	0.640884
1.15888	0.690544	0.667874
0.862567	0.803592	0.670783
1.0037	0.772062	0.706939
0.998098	0.676529	0.625392
		0.738541
0.901086	0.82311	0.652272
	0.75133	0.670906
0.692413	0.792336	0.70616
1.13631		0.655744
0.898478	0.700811	0.717171
0.822517	0.801695	0.715026
1.03653	0.925923	0.691967
1.00811		0.654764
0.865317	0.618808	0.808652
0.696912		0.883757
1.00815	0.865042	0.842475
0.846352		0.759557
0.87886		0.827636
0.832459	0.666504
1.07329	0.726444	0.812332
1.0212	0.819676	0.700875
1.02239		0.779347
1.05959	0.860798	0.850326
1.00779	1.18002	0.739609
1.01319		0.672611
0.991778	0.951818	0.832925
0.966597	0.749397	0.647462
0.872581		0.969691
		0.717731
0.984044		0.661492
0.863833
0.834714	0.806622	0.778544
1.13056	0.671073	0.632319
0.868894	0.881133	0.561177
1.02378	0.649081	0.78081
0.961833	0.805091	0.842203
0.859261	0.785326	0.673595
1.0347	0.663742	0.815229
1.03562	0.819298	0.801738
1.04922	1.02526
1.08404		0.655559
1.06665	0.880067	0.559712
0.958078	0.788863	0.741117
0.786875	1.15904	0.654827
1.00197		0.737482
1.03469	0.807393
	0.973901
		0.647681
0.842896	0.728605	0.703284
0.92894		0.761828
0.885292	0.791567	0.609566
0.996608	1.0461	0.619234
	0.756144
0.981504	0.874708
0.865356	1.09835	0.892364
1.00274	1.12797	0.828797
0.807687	0.811599	0.836948
0.906625	0.701463
1.09687	0.906458	0.680159
0.843633	0.83235	0.608494
0.756756	0.693647	0.708915
0.832008	0.760235	0.668328
1.00007	0.756426	0.549255
0.882742	0.733827	0.673656
0.92741	0.804676	0.782331
0.983953	0.867112	0.933312
0.86592
0.82397	0.733171	0.554199
1.10195	0.972169
0.849365	1.06431	0.661244
0.878144	0.815882
0.710097	0.770498	0.70095
0.913576	0.809189	0.570928
0.85515	0.919973	0.71332
1.04359		0.569159
0.932974	0.696704	0.60131
1.06743	0.930162	0.595766
0.735067	1.16194	0.690745
1.06711	0.669079	0.740159
0.898325	0.651481	0.642432
1.10984	0.8354	0.710965
0.924997	0.875763	0.854037
0.99522		0.786162
1.07201	0.875598	0.745768
0.893398	0.869754
1.04945	0.977431	0.743913
0.764582	0.902283	0.833041
0.986169	0.835752
0.764956	0.967932	0.593604
	0.847178	0.626446
	0.895617	0.660502
0.863368	0.821888	0.601108
1.01752	0.897271
0.794982	0.910583	0.893838
0.989887	0.916554	0.793214
0.88955		0.844859
0.771649		0.765446
0.956906	0.879242	0.651276
0.868636		0.621799
0.882041		0.601831
0.863085	0.667753	0.590086
0.844724	0.696502
0.804552	0.782015	0.663409
0.834172	0.871651	0.933168
1.11925	0.771529	0.628122
1.14955	0.856668	0.80861
1.11132	0.849338	1.1016
0.949796	0.872515	0.816983
0.791843		0.678553
0.771408	0.757181	0.641354
0.91543	0.754859	0.680667
1.11895	0.807537	0.668291
1.12287	0.768906	0.703551
0.866546	0.74847	0.822301
0.908377	0.879493	0.708439
0.879449	0.863016	0.935862
1.03692	0.974799	0.595966
	0.730465
0.742206	0.947688	0.715341
0.935475	0.789696	0.734741
0.722196	0.721492	0.924741
0.954052	0.632425	0.654866
0.848402	0.874903	0.623799
0.999032	0.838481	0.748063
0.970497	0.789528	0.666709
0.809214	1.07543	1.08685
0.858615	0.761996	0.869835
0.867231	0.942925	0.664478
0.886308	0.952722	0.681667
0.781016	0.696601	0.682045
0.90467	0.830966	0.684558
	0.624421	0.610444
	0.847464	0.760076
1.08752	0.604071	0.757795
0.814776	0.868541	0.674428
0.981977	0.902002	0.918832
0.723709	0.92501
0.793679	0.788215	0.543563
0.856287	0.795713	0.610605
0.71098	1.20709	0.714261
0.954236		0.779151
0.893135	0.714387	0.540015
0.86317		0.774761
0.980582	0.862655	0.640901
0.901966	0.908872	0.555562
1.10202	0.744285	0.662212
1.11637	0.672803	0.675027
	0.836765	0.769487
0.748376		0.629268
	0.929839	0.891764
1.03317	0.988207	0.882124
1.01272		0.635092
0.791715	1.05919	0.715586
0.726401	0.809907	0.736294
	0.901534	0.791111
0.762673		0.595687
0.794243	0.654498
0.789837	0.964626	0.608876
0.904515	0.673156
0.901856	0.733559	0.805963
		0.80103
0.948292	0.806877	0.774799
0.924984	0.68784	0.69312
0.781303		0.761339
1.06384		0.88657
0.866726	0.681961	0.78532
0.875529	1.05726	0.883406
0.836947	0.948805	0.768236
0.924526	0.764575	0.73603
0.721699		0.786081
1.02592		0.756147
0.895722	0.680165	0.76863
0.96602	0.856825
0.885941	0.691149	0.857602
0.982778	1.10039	0.680825
0.818817		0.6422
0.940294	0.800199	0.716816
1.00154	0.666385	0.861333
0.84501	0.797731	0.755661
0.787385	0.79644	1.11684
0.946367	0.901821	0.80713
	0.772311
0.84745	1.11303	0.825588
1.01999	0.767081	0.599057
0.702627	0.933653	0.705055
0.822635		0.628093
0.884221	0.677356	1.13608
1.01596		0.724944
0.92644	0.682762	0.570367
0.915335	0.751741	0.789372
0.830134	0.951609
1.00836	0.926697	0.724405
0.969238	0.76457	0.704442
1.05321	0.830012	0.752323
0.879019	1.03454	0.705847
	0.914138	0.746361
0.968051	0.929289	0.596982
0.967888	0.79631	0.564872
0.892093	0.905885
0.899691	0.785167
0.754377	0.909945	0.959243
	0.799667	0.757085
0.754853	0.611326	0.800038
0.820607	1.15814	0.77806
0.973706	0.768234	0.876537
0.818808	0.666339	0.751272
0.93222	0.931671	0.908003
0.840389	0.844891	0.535369
0.804201	0.816307	0.792211
0.846956	0.80727	0.815574
0.871754	1.02197	0.767058
0.727017	0.892907	0.622133
0.969052	0.767897
0.8055	0.838614	0.808294
0.807852	0.815314	0.845157
0.78841	0.857397	0.592273
0.954812	0.683923	0.577291
	0.858983	0.611702
0.91092	0.672887	0.760918
0.867029	0.857308	0.638062
0.700434	0.912738	0.787775
1.09086	0.725077	0.799584
1.04156	0.775934	0.797546
0.784878	0.763074	0.849219
0.778808	0.783233	0.691958
	0.95621	0.931159
0.848743	0.607455	0.608852
1.12821	0.950274	0.606343
0.961545	0.63373	0.906582
0.899349	0.905608	0.838427
0.822512	1.03048	0.882147
0.718455	0.843995
0.910512	0.800835	0.763855
1.00205	0.867998	0.761418
	0.736549	0.628856
0.816937	0.804368	0.808103
0.793825	0.788225	0.881816
0.714495	0.770891	0.589075
0.916267	0.789842	0.651723
0.908286	0.735703	0.604488
1.00819	0.721734	0.929471
0.989434	0.733331	0.872691
0.910697	0.75566	0.652105
1.07246	0.766495	0.539821
0.728298		0.766439
		0.650536
0.880009		0.783422
0.942457	0.835909	0.672186
1.03351		0.734135
0.896497	0.918481	0.587566
0.913951	0.92821
0.991231	0.755478	0.76165
0.872919	0.726286	0.834054
0.872941	0.862015	0.791219
0.985911	0.878143	0.890553
1.02269	0.711336
1.01062	0.824643	0.766574
0.774195	0.772156	0.773127
0.942868	0.819222	0.706277
0.803922	0.789749	0.646125
0.936398	0.89309	0.677542
0.904638		0.728451
	0.802923	0.780112
0.922319	0.758867
0.866622	0.795238	0.831949
0.941203	1.07371	0.889854
1.01156	0.962556	0.784695
0.908021	0.880156	0.856746
0.848348	1.07692
0.880088	0.720992	0.757917
0.717798	0.746823	0.757122
	1.01889	0.862215
	0.844397	0.723683
	0.818303	0.865369
0.831858	0.770903	0.95272
0.834016	0.788057	0.665192
0.938778	0.933085	0.842292
0.940695	0.864429	0.715074
1.09489	0.754772
0.818386	0.770845	0.878013
	0.950956	0.837922
0.862383	0.980657
0.746421		0.606538
0.838197	0.752989	0.851041
0.815419	0.722582	0.730559
0.729581	0.789538	0.732675
1.00124	0.957904	0.793445
		0.669808
0.949912	0.715818	0.699042
1.01104	0.682522	0.734629
0.817147	0.802512	0.612993
0.971354	1.01779	0.718397
0.910607		0.779262
1.00695	0.762294	0.984785
1.18627	0.676133	0.63035
0.8162	0.799318	0.837528
0.970643		0.762385
0.943614	0.73675	0.709326
0.778973	1.02064	0.831506
1.00677	0.869214
1.0721	0.762366	0.778751
0.944583	1.05699	0.77862
0.963941	0.937812	0.714481
0.931347	0.59824	0.769415
0.974312		0.958341
0.814286	0.932442	0.98855
0.987931	0.818302	0.703187
0.950564	0.777669	0.770197
1.15124	0.833362	1.00972
1.0886	1.19755	0.908591
0.774551	0.989419	1.00127
0.777154	1.05807	0.76079
1.02509	0.779622	0.707078
1.0234	0.846106	0.806575
0.805161	0.697866	0.5878
0.843973		0.727734
0.81833	0.858164	0.785689
0.909169	0.856098	0.799945
1.15907		0.700865
0.849107	0.700516	0.741857
0.899541	0.763993	0.852755
1.05967	0.689113	0.618672
0.911804	0.745638	0.867521
1.03855	0.847931	0.893734
1.08553	0.790585	0.870513
0.950774	0.702579
0.917267		1.01408
1.04777	0.748352	0.901848
0.791475	0.713592
0.971461	1.07458
0.783872		0.883794
0.84853	1.18344	0.789021
0.948286	0.64522	0.739029
0.712371	0.84878	0.706465
1.12936	0.946042	0.852613
0.868732		0.990303
0.960631	0.880833	0.715639
	0.776107	0.702283
0.868634	0.879895	0.780593
0.922714	0.900684	0.653834
0.998378	0.921849	0.712255
0.858274	0.6692	0.81717
0.88914	0.975742	0.717122
0.865099	0.778291	0.67435
1.04547	0.793637	0.837728
0.939891	0.767212	0.577023
	0.777701	0.738644
0.76374	0.635967	0.831459
	0.857261	0.780392
0.985208	0.790329	0.697228
1.14796	0.670716	1.03071
0.945867	0.804152	0.887357
0.71314	0.992634	0.759964
0.966092	0.809488	1.05681
	0.777272	0.711619
1.03619
0.95605	1.03738	0.817941
0.875493	0.702524
	0.714589
1.10059	0.963125	0.632918
0.934653	0.727308	0.828485
0.869453		0.769871
0.911504		1.10678
0.81996	0.784236
0.875663	0.775734	0.816959
0.951884	0.704678	0.832303
0.975211	0.907098	0.940562
0.921822	0.923803	0.862888
0.8602	0.757216	0.716905
0.98226	0.785961	0.967656
0.937092	0.695349	1.10967
0.718777	0.767776	0.70694
1.11506	0.70038	0.786666
0.992462	0.901249	0.885278
0.75942	0.786421
1.01602	0.818575	0.574197
0.835567	0.841933
0.986413	0.968834	0.915601
	0.695263	0.705869
1.08773	0.832762	0.568059
0.980876	0.839612
0.904785		0.978168
0.75835		0.713776
	0.671011	0.897486
1.02872	0.80043	0.756286
0.947503	0.911197	0.78667
	0.806437	0.779776
0.915	1.09713	0.616031
0.879648	0.665207	0.798913
0.94499	0.947227	1.14017
1.07222	0.691238
1.18424	0.724401	0.807375
0.792826	0.721279	0.794994
	0.858429	0.850169
0.859172	0.758624	0.853563
1.00304	0.839312	0.711652
0.934655	0.85099	0.756041
1.05958	0.91072	0.964341
0.969664	0.830849	0.617817
0.870334		0.782521
0.760532	0.869972	0.702618
0.805533	0.70701	0.746296
0.968683	0.999948	0.665574
0.879421	0.679136	0.859058
0.941793	0.836214	0.775499
1.06721		0.687567
0.947199	0.652352	0.725223
0.944484	0.921752	0.61602
0.859196	1.21127	0.614857
	0.78504	0.699161
1.00687	0.852634	0.875689
0.927841	0.748734	1.06176
0.71555	1.0208	0.719908
1.02219	0.933262	1.01855
0.725416	0.908279	0.896315
1.11837	1.21212	0.734438
0.870784	0.764173	0.748573
0.819436	0.659481	0.915
0.934954	0.641515	0.699169
0.809869	0.74956	0.743524
1.00761	0.898042	0.719325
0.990267	0.820974	0.829748
1.0247	0.85411	0.913159
	0.802546	0.694415
0.985276	0.76667	0.815662
	0.970914	0.725391
0.960648	1.01848	0.68498
1.01267	0.784277	0.744311
0.70055	0.885304	0.710689
0.889525	0.870552	0.683887
0.868169	1.10523
0.714043	0.708992	0.735826
0.895241	0.958271	0.716738
0.950277	0.857622	0.768158
	0.76683	0.801013
0.943699	0.781849	0.784232
0.949947	0.859991	0.760916
0.899471	0.915716
0.869319	0.835476	0.647552
0.876842	0.848152	0.749515
0.938574	0.801123	1.02336
0.75084	0.85976	0.693908
0.984851	0.716552
0.920787	0.763737	0.715175
0.834312	0.728646	0.642288
0.834001	0.777601	0.651728
0.954266	0.699863
0.899574	0.727648	0.823797
0.786131	0.678715	0.733527
0.762112	0.722507
	0.679728	0.756619
0.769643	0.942491	0.60699
1.05293	0.966443	0.893641
0.706667	0.728252	0.850012
1.02088	0.837907	0.542478
0.85041	0.857294	0.803097
0.728883		0.81493
0.80683	1.17028
0.935946	0.852159	0.686275
0.973545	0.79226	0.701183
	0.889142	0.685732
0.86935	0.933096	0.810603
0.725891	0.742486	0.790114
0.860446	0.740289
0.715978	0.81194
0.981984	1.14292	0.707376
1.0313	0.812579
0.876416	0.723251	0.712159
0.931142	0.86618	0.70121
0.805188	1.02205	0.716124
0.813474	0.827369
[truncated: 164 more rows]

## Sheet: TFEB_TR 30min mk response 
TFEB_TR; 30min mk response
vehicle	125nM MK2206	1uM MK2206
	1.3637
1.22168	1.22799
1.44805		1.06456
	1.13633	1.03277
	0.891868	0.964413
1.1711	1.20374
1.08646	1.18408	0.770313
1.33381	1.16997
1.03303	1.15233	1.06064
1.4033	1.63655
1.23721	2.18724	1.00025
0.979508	1.21129	1.08489
1.36542	1.18161	0.795508
1.22639	1.26548	1.67188
0.951348	1.19197	0.714749
1.56013	1.16086	1.27945
	1.07066	1.15799
1.19096	1.25166	0.893699
	1.92638	1.12088
0.896067	0.934395	1.01125
1.99157	1.32618	0.942483
2.12867	1.32628	0.961122
1.26543	1.31642	2.11707
1.46303	1.24985	1.97387
1.35297	1.06018	1.23232
1.46435	1.15883	1.21151
1.03313	0.971236	0.914195
0.919448	1.34182	1.05306
1.266	1.83419	1.16415
1.12799	1.41415	1.1352
1.29095	0.886747	1.15117
1.19015	1.01241	1.45067
1.33473	1.28742	0.97339
1.67092	1.25864	1.14577
1.45034	1.5246	0.878092
1.47758	1.13542	1.0897
1.69431	1.4855	1.07067
1.10292	1.22749	1.20735
2.00964	0.966973	1.19846
1.09026	1.04924	2.14648
1.59981	0.930842	0.985553
1.18327	1.22499
1.69681		0.937299
1.14338	1.14731	0.893613
1.22976	1.66953	1.47188
	1.42667	1.28342
2.21547	1.15661	1.15257
	0.966533
1.19425	1.1724	1.02617
1.36252	1.18003
	1.54852	1.06462
1.25332	1.13892	0.903904
1.21283	0.989241
1.16541	1.2283
1.15396	1.36149
1.23256	1.10458	1.44345
1.39011	1.31826	1.16053
0.97459	1.78774	1.0566
1.3463	1.25994
1.42238	0.967658
		0.84011
1.36365	1.0988	1.10418
1.35114		1.29943
1.16305	1.17609
0.854247	1.05985	0.833804
1.27301	1.27031
1.31441	1.29688	0.975776
1.85534	1.17858	0.978534
1.3851	1.12071	1.24948
1.23989	0.975922	0.933216
1.30687	1.28416
0.933812		1.51595
1.17548	2.10132	1.40703
1.04232	1.17502
1.53518	1.29003	1.13554
1.19222	1.60613	0.987925
1.3417	0.915952	2.09969
1.09821	1.29159	0.899475
1.8051	1.18444	1.17414
0.921763	1.17052	1.37804
1.07784	1.09327	0.836946
	0.992614	1.17127
	1.07444	1.19912
1.01397	1.1306	1.166
1.32308	0.87402	1.02623
1.00427	1.07469	0.766543
1.24959	1.03869
0.983134	1.57038
	1.75943	0.954949
1.11643	1.72113	1.05451
1.60028	1.35316	1.12073
1.40812	0.85368	0.949077
1.43225	1.14176
1.50454	0.893406	1.21072
1.42016	1.55124
1.08595	1.11928	1.23866
1.30434	1.10286	1.07928
0.986022	1.46239	1.31551
1.19472	1.71361	1.12656
1.34425	1.1651	0.942126
1.16326	1.44956	1.59914
1.40642	1.79321	1.02417
1.98556	1.195	1.02984
1.20044	1.08467	1.05791
1.88135	1.10967
1.90995		1.35991
1.29225		0.930259
1.19424	1.18533	1.31556
1.08455	1.24977	1.04763
1.4564	1.48721
1.31328	1.04428	1.56415
1.68235	1.20259	1.06735
1.69839	1.2175	1.51733
1.14511	1.59872	1.41395
0.968702	2.21325	0.929483
1.58453	1.36765	1.6364
	0.946644	1.44893
1.30244	1.42798	1.20814
1.13304	1.35695	1.02099
	1.12071	0.927098
1.20916	1.06548	1.03672
1.03082
1.36114		0.977229
1.29046	1.23293	0.910353
0.940843	1.16787	1.15459
1.12002	1.23806
	2.13758
1.01004	1.1306	0.893862
0.993581	1.11971
1.29209	1.218	1.09437
1.23492	1.81415	1.29316
	1.55927	1.41551
1.31404	1.00461	1.11802
1.05494	0.966269	1.13095
1.26251
1.20352	1.32816	1.03289
0.893184	1.14762	1.05826
1.2352	1.40782	0.909723
2.25067		1.47451
1.11234	0.992298	0.915558
1.44161	1.88689	0.908695
		1.01378
1.2576	0.899915	1.31655
1.25281	1.50375	0.987242
0.876744	1.09533	1.15691
1.33424	1.25904
1.34801	1.22512	1.02678
1.43052	1.46789	0.966667
1.43754	1.02991	1.34309
1.19975	1.263	1.51803
1.32706	1.30886
	1.77524	1.08059
0.990692	1.20027	1.04952
1.19354	0.862625
1.87801	0.909874	1.02718
	1.2957
1.1049	1.2051	1.22684
1.35963	1.0304	1.13447
1.23428	1.07485	1.02324
	1.15493	1.31463
1.16929		1.12714
1.35452	0.87055	1.30163
1.38408	1.45949	1.3765
1.39367	1.17064	0.881463
1.39163	1.21401	1.12143
0.858618	1.02286	1.50668
1.45263	1.27409	1.0946
1.34128	1.25205	1.1513
1.09195	1.51793	1.08523
1.57769	1.01098	0.812779
	0.982121	0.983674
1.39154	1.17288	1.63857
1.45688	1.16323	1.36461
1.42996	1.12644	1.1857
1.70237		1.28068
1.4296	1.11206	1.0281
1.09144	1.00113	1.10685
	1.17032	1.07705
1.25029	1.18203	0.886087
1.52775	1.10332
1.64464	0.97341	1.98313
2.0463		1.44326
1.06452	1.4828	1.31036
0.918001	1.24464	1.94691
1.46453		1.04263
0.938956	1.34234	1.30928
1.20099	1.09706	0.961584
1.88705	0.909962	1.17806
1.284	1.1577	1.29016
1.14677	1.27578
1.24141	1.31328	1.26051
1.53896	1.45302	1.33761
1.15079	1.4528	1.3739
1.57172	1.18744	1.38575
1.27208		1.30701
1.10628	0.931745	0.935644
0.859248	1.31566	1.03014
2.05677	1.08424
1.12695	1.15776	0.81128
1.36233	1.40076	1.19131
1.64219	1.26495	2.09202
1.35428	0.909996	1.16035
1.25226	1.21725	0.934646
1.00629	1.42638
1.15756	1.0886
1.23707	1.07038	1.26379
1.32042	1.25615	1.12689
1.16531	1.22169	1.12997
1.09027	1.08456	1.16145
1.16604	1.02743	1.02347
1.48178	1.223	1.03155
1.11183	1.3541	1.05269
1.10221	1.2629	1.24957
1.02887	1.3943	1.00936
1.4617	1.23737	1.28292
1.86162	1.02429	1.09366
1.02825	1.41223	1.19424
1.15626	0.96273	0.965958
1.11794	1.06666	1.10632
	1.34921	1.2278
1.91231	1.00164	0.856205
1.3117	1.14915	0.973495
1.1266	1.04723	1.21531
1.24674	1.77222	1.09649
1.19328	0.869185	1.01873
1.31866		1.10007
	1.68725
1.36773	1.43263	1.18203
1.37207	1.2723	0.984972
1.15912	1.40402	1.35717
1.23191	1.01939	1.27326
1.03218	1.25162	1.27989
0.859675	1.10235	1.13189
1.21689	1.07043	1.12581
1.32059	0.862017	1.22193
1.2067	0.947652	1.37456
1.44502	1.3013	1.33594
1.29089	1.49632	1.1907
1.11767	1.04739	1.18173
1.39414	0.965743	1.09997
1.44064	1.30072	0.895693
0.940651	1.40337	0.915793
1.53398	0.913928	1.01118
1.2159	1.05542	1.32149
1.26132	1.08932
1.31896	1.1549
1.04661	1.20764
0.944233	1.13432	1.11533
1.09049	1.14138	0.829703
1.25988	1.34093	1.01086
1.28441	1.72221	1.17646
0.849704	0.985133	1.15356
1.60366		1.42848
0.875414	1.30302	1.21392
0.89009	0.994992	1.19364
	1.11554	1.21663
1.41702	1.37968
1.06361	1.26075
1.3566	0.938535	1.08001
1.19166	1.09867	1.24248
1.17385		1.07733
1.63329	1.11079	0.922697
1.23688	1.00271	1.14065
0.909046	1.23897	1.15819
1.2901	1.23425	1.21889
1.2851	1.26891	0.858101
1.23353	1.01239
1.55021	1.43774	0.888945
0.953679		0.763062
1.39896	0.980629	1.21333
1.38112	1.1609	1.19559
1.35999	1.06372	1.12026
1.23309	1.21624	1.469
1.26455	1.25482	2.18743
1.20473	1.25264	0.935834
1.11951		1.16286
1.71594	0.910627	1.25057
1.0637	1.4237	1.58107
1.24152	1.20193	1.10416
1.21796	0.862748	0.795967
1.36487	0.948922	0.971892
1.05321	1.01585	1.16395
1.04753	1.23287	0.901237
1.21342	0.903338	0.949065
1.25351	1.62409	1.06033
1.1548	1.06222	1.12964
1.69657	1.37795	1.0908
1.08447	1.09829	1.53011
1.12148	1.26108	1.41783
0.980611	1.75102	0.946507
1.28351	1.79548	1.3193
1.23221	1.16443	1.54896
1.32362	1.84247	1.56282
1.05302	1.11364	0.916093
1.53068	0.859773	1.11502
1.01569	1.107	1.35621
1.24136	1.05304	1.64048
0.914643	0.974919	1.11043
1.26749		0.989553
1.5008	1.11293	1.05924
1.02197	1.28788	0.868153
1.00566	1.10776	0.941701
1.38513	1.11899	1.23794
1.20609	1.07544	0.941251
0.991555		1.2446
0.922847		1.06014
1.21309	1.08138	1.03383
1.41653	1.14148	0.939151
1.18764	1.28378	1.04585
1.23496
1.08832	0.932693	1.18777
0.966069	1.06949	0.907601
1.13067	1.00181	1.10035
1.60214	0.931346
0.894937	1.25098	1.10511
1.47577	0.802031	1.29443
2.09338	1.05617
1.24181		0.906119
1.53662	1.26368	1.09251
1.73931	0.929301	0.82786
1.12314	0.866368	1.21031
1.09778		1.37773
1.09613	1.27511
1.14752	1.04691	1.13164
1.27557	1.05998	0.718571
1.11159		1.13171
1.33764	1.11532	0.961101
1.14969	0.979062	1.34467
1.30156	1.90126	0.942877
	0.854919	0.97105
1.52523	1.34811	1.12965
1.14341	1.2071	1.22701
1.28161	1.29678
1.21666	0.786739	1.06003
1.40202	1.1792	0.935673
2.02149	1.31027
	0.973911	1.18135
0.999387	1.85575	1.29708
1.06685	1.32865
1.13113	1.0074
1.1046	1.50824	0.833144
1.25142	1.17299	0.931925
1.10432	1.29327	1.163
1.1423	1.05214	0.861363
	1.00798	1.041
	1.06407	1.02935
1.02443		1.93367
0.836064	1.17026	0.888685
1.19645		0.90221
1.58327	1.03027	0.717386
1.16313	1.32658	0.983749
0.982371	1.03449	1.2602
1.2526		1.09501
1.00313	1.012	0.903522
1.06705		1.43142
1.00493	0.801338	1.05133
1.37266	1.62251	1.42829
0.901285	1.03734	1.0045
1.18158	1.2599	1.26849
1.40601	1.40548	1.09449
1.0693	1.62872
1.20204		1.02215
1.15308	1.49243	1.16297
1.67125	1.66235	0.990512
0.936707	1.65595	1.08614
1.49691	1.36748	0.967592
1.23665	0.953543	1.09805
1.00145	1.25901	0.959546
1.75295	1.1123
1.73006	1.14357	1.07042
1.23439	1.60801	1.15727
1.03663	1.06438	1.03181
0.958664	1.285	1.20172
1.54641	1.07277
1.3099	1.21662
1.07617	1.12546	1.29542
0.878826	1.0156	0.888432
1.10421	1.22558	1.05606
1.41427	1.41826
1.12677	1.65135	1.29786
		1.25282
1.29497	1.10187	1.40405
1.08774	1.23208	1.16796
1.17883	1.55751	1.12642
1.11406	1.13125
1.21463		1.23198
1.14293	1.02668	0.901006
1.15618	1.0598
1.41716	1.11335	1.02685
1.24375	0.849461	1.11824
0.966692	1.18059	1.05196
1.22145	1.2407	1.22852
1.0343	1.56714	1.24938
1.06108	1.33504
1.3243		0.967963
	1.10246	1.02131
1.27228	1.1176	1.03915
1.641	1.00103	1.1919
0.847193		1.31276
1.49922	1.04042	1.06364
1.30951	1.08593	1.2399
1.21686	1.21794	0.811656
1.37658	1.18398	1.14415
1.4489	1.30656	1.16125
1.03439	1.82537	1.01155
1.2087	1.30789	0.857966
0.875666		0.890907
1.58873	1.15923	1.46367
1.02328	0.794869
0.823158		1.22773
1.52767	1.16513
1.41204	1.08033	0.975651
1.02206	1.15737	1.07416
1.30507	1.78388	1.13154
	1.31612	0.913749
0.882026	1.05988	0.72847
1.1755	0.940971	1.26238
1.14499	0.93364	1.11388
1.15144	1.78937	1.10217
1.00377	1.22374	1.02275
	1.04231	1.27443
1.42552	1.08727	1.32191
1.09568		0.831807
0.988188	1.14899	0.952862
1.34588	1.09119	1.09739
1.20992	1.20238	1.16709
1.15989	1.07718	1.05786
1.19006	1.15106	1.23736
0.996143	1.32305	1.0107
1.0257	1.51928	1.10109
0.832849	1.2653	1.29826
0.919941	1.05838	0.866728
1.62898	1.0042	0.867802
2.11858	1.33613	1.1533
1.02663		1.10145
2.2702	1.67448	1.38557
	1.01755	2.17259
0.914934	1.20368
1.41155	1.35358	1.04775
	1.11677	1.145
1.37591		1.36649
1.304	1.19856	1.41525
0.968493	1.0924	1.04132
1.13778	0.889697	0.918078
1.16388	1.10144	1.31423
1.06034	1.20101
1.95464	1.10878	1.08654
0.809731	0.92603	0.98409
1.08404	1.15741	1.08323
0.934309	1.10636	1.05228
1.32748		1.35549
1.51461	1.05375	0.977541
	1.25871
1.41114	1.09056	1.02365
	1.36157	1.35627
1.22236	1.44387	0.835995
1.43097	1.28031	1.01246
	1.05824	1.19188
1.37758	0.997745	1.279
	1.17874	1.23087
1.21878	1.07374	1.40464
1.17102	1.0873	1.33546
1.00593	1.24367	1.49782
0.98163	0.935755	1.12305
1.17011	1.53442	1.1909
0.976893	1.45891	1.16977
1.21331	0.768299	0.759878
1.1344	0.937206	1.14542
	1.1486	0.903988
1.19423	1.0717	1.00151
	1.06529	1.03358
1.45076	1.29837	1.11649
1.2015	1.77864	0.904504
2.02414	0.975555	1.18763
1.24604	1.1795	0.957572
1.09782	2.24249	1.18327
		1.38022
1.04463	1.59146	1.14555
1.34713	1.09528	1.04585
0.931051	1.30836	0.889796
1.01862	0.976667	0.954548
1.26621	1.0994	0.919876
	1.39434	0.952384
1.0802	1.29182	1.06619
1.24948		2.06381
	0.944755
1.21228		1.02209
	1.02313	1.13539
1.11323	0.978559	1.17591
1.11616		1.16958
0.926957	1.19401	0.994034
1.1734	1.22555	1.07559
1.36699	1.19779	0.954102
2.01808	0.909753	1.05948
0.870363	1.23178	1.07105
1.06605	1.14709	1.33771
1.38186		1.19459
1.25093	1.29621	1.17176
1.2841	1.14906	1.05353
1.24616	1.07943	1.05883
1.09176	1.1162	1.21018
1.06531		0.969375
	1.1518	0.949782
1.08801	1.20466	0.934362
	1.07703	1.16802
1.1039	0.829979	1.01898
1.16552	1.62966	1.1317
1.17591	1.30204	0.738405
1.30595	1.09041	1.20222
1.30909	1.53363	1.23177
0.919831	1.22061	1.30345
1.42783	1.45849	1.23643
1.09132	1.39207	0.860438
1.29321	1.21488	1.33782
1.24715	1.0236	0.98318
	1.20659	1.18608
1.34252	1.40342	0.922182
1.18956	0.83967
1.21147	0.834933
1.02044	0.930803	1.17063
1.04042	1.07636	0.879579
1.0162	1.56362	1.11899
1.30666	1.22409	1.07628
1.25179	0.961602	0.983598
1.17077	1.12155	1.10781
1.38692	1.32873	1.00907
0.992688	1.42706	0.993706
1.00267	1.4078	1.05073
1.07078		0.890625
1.0209	1.53583	0.861372
0.989382	1.56291	1.82489
0.923758	0.963352	1.2316
1.25664	1.04172	0.955006
1.20159	1.45639
1.23453	1.25774	0.789828
1.18949	0.916605	1.00524
1.22049	1.33645	0.886264
1.18415	0.921526	1.19383
1.72319	1.03424	1.07223
1.12318	0.966071	1.07978
1.17974	1.36274	0.979133
1.03636	1.0132	1.18779
1.04754	1.14838	1.21836
1.29538	1.2637	1.10785
0.98067		1.08737
1.29134	1.46588	1.20615
1.29136	1.17346	0.933049
1.64132	0.841144	1.32409
	0.915421	1.16966
1.53857	1.18978	1.20445
1.26824	1.01494	0.988034
1.03064	1.55937	0.882993
1.23418	0.952308	1.12575
	0.945908	1.11852
1.29931	1.51244	0.87509
1.02212	1.00388	1.08765
1.61336	0.882068	1.29169
1.27281	1.16484	1.03346
1.1702	1.2064	0.902379
1.24132	1.11917	1.22191
1.1483		1.19252
	1.27872	1.00704
1.27723		1.08438
0.98126	0.962123	1.04452
1.37987	0.924527	1.22269
	0.990072	1.07054
1.06843	1.1308	0.922782
1.39631	1.09534	1.28542
1.28518	1.17337	1.21056
0.967965	0.934983	1.27853
1.11665	1.07956	0.915556
1.21471		1.20032
0.985407	1.39057	1.56049
1.26432		1.17098
1.23827	1.34238	0.929552
1.34422	1.13867	1.145
	1.6338	0.967965
1.04527	1.15461	1.30131
1.1182		1.25511
1.23584	1.07112	2.11576
1.28723	1.04344	1.14642
1.37205	0.980857	0.861227
1.2822		1.18723
1.3399	1.36677	1.00757
	1.07289	1.40775
1.47927	1.10475
1.11451	1.0218	1.22057
1.34283	1.41091	1.46622
1.20697	1.39062	1.16261
1.25015		1.07984
1.17123	1.3087	0.964283
1.86196	1.01256	1.05427
1.18495	1.0668	1.04462
1.30174	1.43587	1.05137
1.59187	1.11937	1.03383
1.20258	1.36028	1.46427
2.06733	1.21139	0.938318
1.34519	1.50885	1.01173
1.2477	1.57993	1.24334
0.93351	1.65438	1.04534
1.10404		1.07987
1.45276	1.1604	0.805135
0.837284	1.29571	1.26865
1.35433	1.27821	1.29052
		1.64967
1.1545	1.70006	1.21038
1.05941	1.31344	0.831927
1.44946	1.0967	1.05679
1.60998	1.05942	1.29349
1.15221	1.33448	1.21137
		1.00169
1.19141	0.949181	1.01399
	1.05336	1.10051
1.19054	1.25982	1.25765
1.02429	0.851744	1.03186
1.40734
1.20156
1.28288		1.51214
0.988618	0.980321	1.04629
1.27317	1.94623	1.22228
1.30972	1.16898	1.18686
1.29017	1.42542	0.985676
1.18699	1.05323	1.12915
1.22394	1.24856	1.25483
1.41283	1.73201	1.1058
1.16298	1.05992	0.991314
1.07646	1.33395	1.07
1.05099	1.04679	0.99909
1.41698	1.22488	1.25178
1.41588	1.39789	1.33604
1.17753	1.20561	1.11729
1.08598	1.09757	0.984354
1.21582	1.1505
1.37851	1.18175	1.04213
1.43346	1.01015	0.9468
0.898932	1.21791	1.23917
1.08191	1.1049	0.864081
1.6268	1.09679	1.32363
1.15447	0.881526
1.25367		1.05086
0.989172	1.53275	1.25791
1.13836	1.15833	1.08568
1.25577	1.19389
1.4251	1.26799	0.829066
1.15906	0.993312
1.25927	1.28055
1.18148	1.13938	1.33989
1.16179	1.35369	0.947664
1.28984	1.2757	0.856734
1.3625	1.3013	1.08413
1.04811	1.16359	1.54773
1.36234		1.76667
1.33354	1.01108	1.18861
1.33046		0.957706
1.30325	1.29927
	1.5016	1.23805
1.21518	1.46652	0.942932
0.934146	1.54208	1.36276
0.849682	1.44451	1.44399
1.2415	1.4638	1.36112
0.993371	1.13719	1.27279
1.14658	1.37265	0.864891
1.3124		0.824363
1.31989	1.47329	1.25265
1.3768	1.47858	1.23993
1.81403	1.07068	1.36297
1.10732	1.00451
1.3503	1.17398	1.46352
1.15882	0.988046	1.53495
1.28761	1.36286	1.25062
1.95376	0.998509	0.855191
0.966212	0.845537	1.40978
1.17147	1.4735	1.19753
1.42637	1.13041	1.25657
1.34739	1.18425	1.13501
1.35137	1.13293	1.60726
1.35527	1.53226
	1.02864
0.972104	0.982448	1.99465
1.10253	1.21002	1.1152
1.0774	1.14038	1.0905
1.25864
1.27952	1.52213	1.11032
	1.1421	1.08845
1.09169	1.61689	1.3798
1.40115	1.15835	0.992688
	1.40154	1.20818
1.07927	1.59361	1.16705
1.24035	1.11726
1.13026	1.33885	0.855492
	1.25705	1.88891
1.461	1.1427	1.23185
1.22619	1.21536	1.27577
1.32114	1.33498	0.994141
1.12035	1.23889	0.994797
1.28972	0.979918	1.00837
0.951709	1.21632	1.05323
1.25169	1.29389	0.990619
1.33107	1.24172	0.946652
1.10733	1.51508	1.20859
1.02416	1.37038	1.09669
0.874618	1.39995	1.56004
1.08878	1.22631
0.896791	1.34167	1.49185
0.916254	1.32637	1.25694
1.27431	1.21448	1.17176
1.41086	1.22641	1.78477
	0.984798	0.951417
1.47262	1.20929	1.03342
1.87528	1.1271	1.28354
	1.33766	1.40035
1.3146	1.26728	0.921669
1.23279	1.01885	1.29958
0.925154		1.18001
1.67669	1.22092	1.06711
	1.52374	1.25823
0.891569	1.18484
	1.36747	1.14466
1.04721	0.99811	1.09273
1.19987	1.12664	1.48743
	1.37717	1.27366
1.29764	1.32297	1.16152
1.33301	1.16457
	1.15755
1.23273		1.75771
0.965525	1.24974	1.07619
0.95776	1.352	1.03035
1.74096	1.292	1.11608
1.18162	1.24274	1.04696
1.26142	1.29987	1.04069
1.2132	1.1481	1.19054
1.34991	1.36629	1.37965
1.11474	1.18611
	1.56425	1.22282
1.10023	1.33098	0.953547
1.36487	1.20011	1.03219
1.34001	1.52616	1.26464
0.907788		1.1523
1.10339	1.35949	1.0084
1.1104	1.22796	1.68206
1.18539	1.3227	1.15203
1.3586	1.12044	1.19599
1.09747	1.24738	0.898868
1.0771	1.15687	1.32053
1.18216	1.1139	1.12365
1.03195	1.13971	1.52986
0.949022		0.925255
1.56141		1.17636
1.20408	1.10347	1.27587
1.2163	1.43502
1.15216	1.53072
1.1334	1.0524	1.08298
1.30896	1.59891	1.18355
1.22989	1.50748	1.1375
	0.998371	0.952946
0.907865	1.21681	1.41576
1.17666	1.00886	0.899009
1.01372	1.86181	0.985772
1.15661	1.53823	1.25551
1.38213	1.00232	1.38585
1.06702	1.777	1.53779
1.04648		1.25029
1.1418	0.841802	1.22015
	1.18173	1.1515
0.954029	1.17578	1.24015
1.21204	1.03922	1.31995
1.34642	1.18855	1.21109
1.24322	0.957334	1.21437
0.927444	1.25402
1.02942	1.059	0.967391
1.43661	1.28676	1.28644
1.26398	1.16124	1.20521
1.66753	1.05498	0.995734
0.972121	1.16543	1.05969
1.32528	1.3104	1.17523
1.18598	1.41117	1.14016
	1.71684	1.10163
1.08856	1.5437	0.938994
1.12804		0.882378
1.03171	1.33993	1.02136
1.03843	1.40648	1.34068
1.10184	1.12389	1.07501
		1.36395
1.22779	0.950673	1.32244
1.07053		0.90446
1.27246	1.37368	1.09227
1.29038		1.2945
1.15264	0.919003	1.42469
1.16041	1.27474	1.14919
1.28006	1.3203	1.02853
1.26055	0.949034	0.973898
0.959776		1.10292
1.19397	1.2179	1.35536
	1.38627	1.03336
0.839821	1.09288	0.937532
1.18097		1.10957
1.78463		1.17958
1.36966	1.47062	1.05461
1.45987	1.40166	0.955418
	1.22099	1.36892
1.18595	1.27805	0.879147
1.07958	1.13778	1.51838
1.17477	1.58301	1.41623
	1.279	0.823491
	0.976003
	1.19977	1.13899
1.14776	1.40861	1.67816
0.971977	1.45305	1.11064
1.18998	1.1244	1.30255
1.44684	1.29509	1.34812
1.00012		1.2473
1.47811	0.92	1.09859
1.08447	1.02003	0.999775
1.29557	1.72816	1.30872
	1.28969	1.18398
1.19518	1.53004	0.946527
1.26553	1.24071	1.22573
1.84212	1.28119	1.00173
1.32871	0.989246	1.20324
	1.35293
1.25559	1.31127	1.24205
1.155	1.02586
1.15202	1.6028	1.16845
0.98221	1.3105	1.17414
2.08431	1.24703	1.0561
0.88181	1.0819
0.966528	1.14585	1.1882
1.06025	2.2298	0.946961
1.38833	1.226
1.08028	1.2597	0.808712
1.35528	1.58269	1.05765
1.36114	0.985161	0.882949
	1.25312	0.920826
1.27922		0.964549
1.26909	1.47305	1.2388
1.16622	1.66207
1.32034	1.56452
1.40866	1.417	1.21262
1.33567	1.1593	0.862225
1.18972	1.40136	0.965241
0.954529	1.54462
0.969687	1.38982	1.22993
1.36044	1.5531
1.15926	1.23324
1.31575	1.25567	1.83832
1.14304	0.987202	1.11218
1.27023		1.19672
1.1654	1.04364	1.00484
1.2594	1.28471
1.17029
1.02313	1.21114
1.11959	1.62501	1.1777
1.47155	1.14308	1.22316
1.07812	1.47174	1.18446
1.65213	1.47983	1.19762
1.04709	1.19242	1.16448
1.1272	1.133	1.30195
0.864133	1.22103	1.47913
0.803896	1.27522	1.18823
1.15719	1.02507	1.08387
1.06706	1.23103	0.954491
1.1995	0.942819	1.11039
1.41972	1.49371	1.30902
1.15825	1.34071	1.94439
1.12723	0.88337	0.923703
0.996903	1.58718	1.26036
1.62677	1.33858	0.943718
1.30256		0.932789
1.0533	1.21116	1.11249
1.00076	1.30611	1.01019
0.901443	1.19849	0.957128
1.20588	0.934417	0.877949
	1.11344	0.860106
1.61269	1.30082	1.1954
1.23144	1.16044	1.11463
1.15408	1.30533	1.16393
1.31041	1.24416	1.05062
1.21253	1.36268	0.946784
	1.39704	1.24856
1.27644	1.23596
1.00738	1.23208	1.02629
1.1408	0.875284	1.00667
1.37696	0.9515	1.39224
1.06324		0.835791
1.43904	1.38728	1.28562
0.932561	1.23091	1.16516
	1.158	1.25557
1.37751	1.11958	1.30807
1.25412	1.30666	0.883245
1.34082	1.01849
	1.53297
	1.63272	1.10416
1.04451	1.31823	1.17364
1.30851		1.20232
0.863915	1.48372	1.13619
1.11505		0.956285
1.60403	0.994248	1.13147
1.19433	1.11595	0.8778
1.40382	0.973334	1.14964
		1.07049
1.36934	1.01382	1.17439
1.36455	1.1332	1.31408
1.13164	2.22189	0.905295
0.903861	1.37301	1.04738
1.13934	1.06356	0.971913
1.12797	1.23162	1.26438
1.36892	1.29394	1.25408
0.972891	1.06786	1.12207
1.25669	1.28916	1.27443
1.17704		0.98807
	1.33161	1.09649
0.911921	1.11597	1.3253
1.76612	0.963729	1.35605
1.14436	1.35208	1.9103
1.20216	1.21058	1.1415
1.31819		1.29101
1.87578		1.17452
1.17567	1.06631	1.18108
1.33757		0.980416
1.75706	1.11458
1.52047	0.93571	1.20228
1.19037	1.1009	1.24609
1.20175	1.31903	1.12325
1.06764	1.71683	1.58599
1.14628	0.992673	1.03559
1.28593	1.11815
1.1806	1.72347
1.00114	1.34582	1.20845
1.49724	1.14387	1.0543
	1.03958	1.38321
1.31427	1.22896	1.62426
1.02815	1.52816	1.13191
1.28556	1.34006	1.12958
1.08004	1.37796	1.49758
0.964276	1.01067	1.19734
1.46767	1.24007	1.22819
1.50823	1.18683	1.26166
1.13736	1.24254	1.17553
1.08149	1.30459	0.840272
1.35656	1.97338	0.987091
	1.52847	1.38539
1.10293	1.05426	1.16259
	0.963204	1.11718
1.27986	0.992489	0.929088
1.36058	1.36574	1.39609
1.13016	0.996023	1.101
1.31256	1.13094	1.4107
1.10321	0.957115	1.29068
1.42878	1.02003	1.49093
1.21304	1.37307	1.11947
1.26205	1.45442	1.07063
1.29224	1.21649	1.15454
0.864811	1.3391	1.57404
1.2794	1.06004
1.05227	1.27892	0.911164
1.29647	1.14592	1.24671
1.38685	1.77313	1.12336
1.2879	1.55708	1.18959
0.866232	1.12249	1.22353
1.16263	1.22114	1.00424
1.86231	1.28759	1.32576
1.07682	0.834372	0.901612
1.24504	1.30292	0.824728
1.05771	0.825606	1.16238
1.10734	1.99784	0.878972
		1.13719
1.342	1.40671
1.22272	1.05864	1.24319
1.07367	1.02253	1.08969
0.918764		1.16515
0.880968	1.13678	1.27142
		1.16074
1.23108	1.40088	0.967843
0.998323	1.20455	1.21136
1.31569	1.186	1.01627
1.29636	0.974237	1.48174
1.14909	1.05408	1.06
1.07627	1.54576	1.33775
1.00216	1.35394	1.49944
0.898914	1.70225	1.2179
1.18137
	1.2586	0.977427
	1.61528	1.11128
1.05013	1.25137	1.20777
1.01582	1.62813	1.02633
1.6788	1.35314	1.11151
1.24887	1.31708
1.31968	1.11388	1.37181
1.22444	1.20475	0.972579
1.38602	1.1173	1.2651
1.5407	0.912258	0.95437
0.858166	1.38461	1.18226
2.08806	1.24054	1.07562
1.15502	1.26921	1.12831
1.13484	1.32644	1.02013
1.0082	1.77926	1.1708
1.09993	1.12629	1.43116
1.25618	1.17542	1.09737
0.883127	1.11206	1.08941
1.21628		1.15795
0.935191	1.40908	1.28614
1.12582	0.965301	1.19723
	1.08816	1.04935
1.06806	1.48008
1.25736		1.15253
1.68181	1.02511	1.10811
1.10176	1.25112	1.36131
1.47448	1.13634
	1.13051	1.1772
1.10045	1.28637	1.07894
1.10721		0.987232
1.32267	1.45919
	1.17996	0.872852
1.12366	1.05964	0.96666
	1.5859	1.30872
0.958729	1.2796	1.24633
1.42238	1.37309	1.18261
	1.51384	1.32134
	1.32996	1.25902
1.31604	1.0921
1.26327
1.25333	1.18799	1.02088
1.16107	1.07962	0.784176
1.18683		0.97778
1.23475	1.41467	1.18498
0.960596	1.23641	1.42161
1.34444	1.43737	1.23885
	1.21192	1.30944
1.21209	1.17579	1.30948
1.1189	1.3433	0.95522
1.15682	1.18225	0.908827
	1.23855	1.44186
0.969264	1.23804
1.35102	1.18837	1.16162
1.19773	1.22098	1.11852
	0.957784	0.985125
1.14428	1.17693	1.63072
0.974851		0.874384
2.01701
1.27387	1.16367	1.26044
	1.35254	1.53317
1.13084	1.32464	1.53246
	1.11222
2.15157	1.17921	0.954648
1.13969	1.12496
1.03665	1.33083
1.48236	1.20059	1.36232
1.37345	1.19779	1.18789
0.961242	1.92655	1.46951
1.21521	1.21234
1.23738	1.4715
1.30666	1.20677	1.33068
1.35136	1.21378	1.00624
0.865962	1.67212	1.35863
1.3594	1.01819	0.970859
1.06447	1.34377	1.17718
1.32911	1.06231	1.01316
1.21987	0.818532	0.948061
1.1268	1.05851	0.937656
1.35916	1.17011
1.47974	1.25383	1.16908
1.29211	1.19897	0.980918
1.31512	1.019	1.03494
0.870493	1.16861	1.05868
1.24032	1.35603	0.916813
1.38588	1.23211	1.22956
1.38099	1.16715
1.26317	1.14311	1.04069
0.946126	1.23352	0.991964
1.47184	1.23709	1.10662
1.38355		1.25789
1.17826	1.38962
1.34404	0.902216	1.06087
1.03506	1.25617	1.01184
1.0206	1.04685
1.35906	1.13304
1.01967	1.52165	1.40635
	1.61722
1.45622	1.2349
1.68488	1.47373	1.16989
1.48121	1.06197	1.26144
1.59998	1.28673	1.33472
1.31565	1.152
1.4291	0.958305	1.41219
	1.1713
1.24502	1.40407	1.11918
1.09953	1.61446	1.1755
1.2855	1.11455
1.28833	1.44598	1.30903
1.10686	0.956936	0.999666
	1.36971	0.932397
1.35686	1.15344	1.1549
1.07252	2.10101	1.15688
1.21442		1.27126
1.19654	1.57112	1.28184
1.39725	2.04792	1.03734
1.09403	1.52854	1.15411
	1.11272	1.05301
1.23545	1.4074	1.68428
0.969104	1.21946	1.2064
1.25825		1.45252
1.72679	1.49339	1.35026
0.920001	1.17006	1.13715
	1.19244	1.26098
1.13862	1.00705	1.02043
1.26386	0.953058	1.15893
1.1819	1.25676	1.15994
1.16496	1.28071	1.2498
1.24637	1.95806	0.970917
1.13972	1.09405	1.44862
1.27738	1.00739	0.989025
	1.41443
1.27112	1.25025	0.86142
1.11083	1.29057	1.12259
1.14725	1.27982	1.05418
1.01244	1.07095	1.57553
	1.17358	1.07124
1.21962	1.4322	1.1457
1.02403	0.995238	0.860398
1.06764	1.07184	1.03598
1.44304	1.00064	1.26746
1.2804	1.48648	1.05245
1.00221	1.08056
	1.07982	1.17002
1.0351		0.915124
0.828091	0.989226	0.983493
0.967005	1.34103	0.883833
1.2044	1.00334
1.2258
	1.16166	0.808694
1.27671	1.47457	1.24339
1.0237	1.37578	1.06748
1.48856	1.68151	0.837113
1.37164	1.24841
	1.25471	1.01074
1.08917	1.28478	1.04805
0.919553	1.3516	1.0929
1.30449	1.33796	1.15868
1.27583	1.03122	1.22636
1.1686	1.08749	1.34222
1.04479		1.27941
0.97001	1.26395	1.49875
1.01852	1.31663	1.06629
1.01624	1.25791	0.955817
	1.33515
1.10782	1.20915	1.09904
1.21751	0.897974	1.21663
1.14217		1.07117
0.948294	1.30752	1.22053
1.60509	1.40139	1.04116
1.10479	1.19234	1.26402
1.32035	1.29586	1.08753
1.5958	1.08605	1.05158
1.5097	1.3391	1.26965
1.67039	1.39584	1.48327
	1.62678
1.11288	1.34565	0.888921
1.32422	0.902392
1.16302	1.00386	1.09051
1.49888	1.31212	1.46898
1.17056	1.25273	1.06105
1.29321		1.28748
1.02964	1.28316	0.975332
1.24788	0.890331	1.19111
1.49508	1.11568	1.43141
0.979881	1.26115	1.06833
1.28111	1.17403	0.788831
1.15769	1.34524	1.00892
	1.06845	1.04287
1.27647	1.31117	1.20926
0.924847	1.17055	0.911521
1.15127	0.962394
1.15968	1.68847	1.27587
1.11312	1.18885	1.07858
1.19905	1.30308	1.06183
1.13295	1.13746	1.15022
1.27066	1.46143	1.05665
1.74277	1.07867	1.18609
		1.21684
1.1216	1.23753	1.1707
1.32465	1.16487	1.23304
1.25237	1.1453	1.19138
	1.10386	0.769123
0.928044	1.51867	1.1553
1.03977	0.863515	1.35756
		1.22817
1.39457	1.11923	1.11118
1.23917	1.04605	1.17567
1.31262		1.33846
1.42507	1.24221	0.933141
0.966418	1.26096	1.20795
1.15629	1.28504	1.00179
1.19791		1.18437
1.06285		1.30947
1.47802		1.2722
0.81862	1.14431	1.28459
0.95752	1.22916	1.32388
1.08506	1.16796	1.25375
0.993588	1.1626	1.07638
1.21107	1.15569	1.3587
1.84767	1.34705	1.72766
1.15042	0.885637	0.939193
1.56999	1.1775	1.24021
1.13049	1.0516	0.871222
1.28045	1.08408	1.47887
	1.38062	0.98409
1.10106	1.04214	1.17794
1.29462	1.30617	0.965059
0.940098	1.1481	1.3333
1.19183		1.19006
	1.06607	0.760127
1.06711	1.14185	1.14674
1.6356	1.29819	1.15845
1.23783	1.0472	1.65646
1.28419	1.02131	0.794298
1.40677	1.08886	0.886973
1.4136	1.03247	1.12862
1.08266	1.40384	1.14394
1.26114	1.18863	0.936371
0.964517	1.11112	2.13345
1.21841	1.1949	1.24316
1.17356	1.42105	1.08336
1.12447	1.17043	1.00155
1.19627	1.05072	0.956317
1.29001		0.985292
1.04061	1.12052	0.795856
1.21143	1.40514	2.15687
1.74512	1.04123	1.1059
0.873096	1.04512	0.743224
1.14059	1.84458	1.0772
1.1245	1.27368	0.95684
1.07487	1.24266	1.1451
1.13713	1.39793	0.991557
1.35585	1.48452	1.42693
1.19939	1.22464	0.95289
1.02089	1.30623	1.61142
1.15042		1.22109
1.48686	1.38271	1.13624
1.04762	1.20869	1.06233
1.25126		1.3049
1.58154	0.967955
0.933747	1.18072	1.30498
0.994884		0.953317
1.16858	0.936191	0.915856
1.44432	1.25488	1.08587
1.17906	1.48976
1.31903	1.1077	1.00622
1.06933	1.16025	1.06921
1.22576	1.87735	1.02413
	1.15581	1.17552
1.25412	1.37157	1.23565
0.880149	0.983443	1.16763
0.831541	1.1251	0.936557
1.06104	0.958582
1.06192	1.58738	1.61455
1.20291	1.48635	1.13
1.07322		1.62059
1.46709	1.2856	0.913387
1.10514	0.962616	1.20604
1.35397	1.32174	1.37069
1.41208	1.14926	1.36088
1.07275	1.96507
1.22973	1.19604	1.50177
1.08957	1.14846	1.05472
	1.15057	1.19583
1.46712	1.21031	1.21522
1.13171	1.24695	1.02562
0.889523	1.15625	1.02917
1.28509	1.33259	1.12399
0.865399	1.04458	1.30463
1.06378	1.1838	1.0754
1.22561	1.31709	1.37934
1.57048	0.993564	1.35151
1.17525	1.21619	1.12867
1.34137	1.43134	1.34876
1.01165	1.07834	1.88176
	1.25669	1.17957
1.46156	1.83779	1.213
1.08314	1.15935	1.31292
1.3085	1.23293	1.11954
1.21148	1.45972	1.21049
	1.45449	1.61733
1.35591	0.926144	1.11305
1.33448	1.22645	2.17492
0.939597	1.01516	1.34306
1.23513	1.15486	1.11695
1.47031	1.1065	1.11812
1.20663	1.17807	1.04446
1.08728	1.14754	1.39449
1.10748	1.10504	1.31006
1.18819	1.19986	1.05058
1.12135	1.29214	1.20525
	1.21304	1.62399
1.11242	1.28317	1.19027
1.35344	1.25379	1.4723
1.0107	1.09392	1.18687
1.74905		1.25368
1.21805	1.16335	1.34391
1.31009	1.20508	0.865398
1.10159		1.02043
1.49738	1.11847	1.21165
1.09879	1.60955	1.33863
1.07194	1.37203
1.18849	1.26074	1.19991
1.09666	1.13986	1.04285
1.25127	1.34016	0.880873
1.29457	1.38735	1.11442
0.950067	1.38898	1.10559
0.874624		1.36761
	1.18378	1.7447
1.22952		0.985029
1.41448	1.22332	1.13386
1.20071		1.22817
1.2635	1.36381	1.17813
0.966617	1.16942	1.19478
0.981366	1.44803	1.06789
1.03365	1.27731	1.14461
1.08772	1.36039	1.17568
1.30789	1.36615	0.929715
0.944205
0.989281	0.955904	1.15487
1.06261	1.19864	1.23779
1.08889	0.90275	1.27664
1.27066	1.15596	1.03513
1.08194	1.38884	1.16213
1.20879	1.1404	1.14982
1.50476		1.03411
	1.28701	1.13032
1.12229	1.51066	1.31399
1.10018	1.49507	1.75593
1.26947	1.08672	1.23578
1.18412		1.31309
	1.54205
0.835809	1.32998	1.06812
1.48951	1.30771	1.40273
1.09145	1.27971	1.05275
1.35692	1.15087	1.79894
1.17076	1.32743	1.13885
	1.37129	1.18003
1.26199	1.49229	1.27002
		0.970595
1.2741	1.46341	1.20382
1.05457		1.15045
1.13466	1.34191	1.28086
1.15397	1.23224	1.01765
1.11825	1.27235	1.40789
2.00732	1.36738	0.875281
1.51458	1.09537	1.2001
	1.11627	1.04725
1.02249	1.12195	1.01572
	1.1587
1.11437	1.35938	1.36688
1.22033	1.10011	1.37039
	1.37921	1.25285
1.02841	1.19075	1.8126
1.15899	1.09298	0.910001
0.992641	1.14228	1.06902
1.41157	2.09239	1.8844
1.25275	1.20507	1.10614
1.69826	0.985668	1.23777
1.03938	0.929002	1.33234
1.42134	1.31723	1.24237
1.22553	1.28575	1.14653
0.995823	1.10455	1.35072
1.00748	1.24734	1.65377
1.20031	1.14655	1.0796
1.34546	1.17557	1.34914
1.17999	1.25069
1.03677	2.00168	1.25694
1.0642	1.14138	1.11599
1.09817	1.28179	0.975099
1.19247	1.13305	1.3406
1.30539	0.974879	0.947483
1.84153	1.1845
1.25011	1.17001	1.43985
1.57606	1.55272	1.42336
1.29765		1.13434
1.20236	0.914068	1.64069
1.10156	1.39221	1.27541
1.1579		1.32171
1.40159	1.70025	0.870512
1.33956	1.16723	1.11147
1.44757	1.24913	1.38075
1.29729	1.00236	1.17619
1.18994	1.38086	1.16396
0.990278		1.32689
1.27768	1.12309	1.07897
1.26045	1.24204	0.99507
1.32844	1.16558	1.28796
1.10683	1.54999	1.06172
1.08467	1.10704	2.0484
1.09911	1.41738	1.61974
1.09636	1.69921	1.16279
1.08403	1.27183	1.16896
1.21422	1.2732	1.37761
1.93564	1.40081	1.45747
1.22271	1.74431	1.22676
1.35401	1.05157	1.1018
1.35398	1.05007	1.2071
0.99699		1.19775
1.79071	1.10481	1.33595
1.34492	1.21139	1.21228
1.03872	1.3476	2.18967
1.0499		1.31323
1.00005		1.34568
	1.25498	1.14834
1.58442	0.931242	1.20632
1.64258	1.2454	0.832582
	1.21919	0.852364
1.2093		1.06117
	1.13804
0.813701	1.25557	1.25587
1.02471	1.11315	0.966192
1.08204	1.51118
1.20634	1.5072	0.9904
1.25135	1.22107	1.22241
1.16595	1.31868	1.29648
1.36738	1.07676	0.851421
1.09281	1.57888	1.0107
1.83457		1.29065
1.01575	1.16006	1.08922
1.81726	1.41548	1.05071
0.878544		1.21971
1.14899	1.17049	1.16828
1.33688	1.33792	1.22251
		0.981863
	1.02928	1.12579
1.87672	1.10502	1.06858
1.02023		0.929347
1.13839	1.1757	2.11693
0.948428	1.56199	0.979632
1.46008		1.0739
1.53409	0.957751	1.10179
1.14627	1.11768	1.50378
	1.25777	1.1438
0.981633	1.11651	1.10351
		1.13527
1.0331	1.40868
1.15649	1.08297	1.38401
1.42411		1.05727
1.15996	1.07092
1.13321	1.39229	1.00577
1.2383	1.20138	1.26117
1.24514	0.881073	1.13449
1.66809	1.26355	1.30619
1.2318	0.849421
1.25685		1.04913
1.81982	1.75112	1.49865
1.69021
1.11106		1.36961
1.53473	1.00794	0.983164
0.82934	1.04351	1.10519
1.22772	1.67169	1.09421
1.18323	1.24006	1.23354
1.42635	1.04757	1.0663
2.08501	0.824136	0.905787
1.3919	1.41081
0.968484	0.855487	1.03791
	1.22253	1.30711
1.18375	1.11405	0.895008
1.25679	1.21213	1.33059
0.843929	0.835554	1.40441
1.39233	1.12585	1.02424
0.889788	0.94563	1.92675
1.40686	1.65523
1.27139	1.32298	1.17841
1.07473	0.966462	1.17128
1.14752	1.73074	1.45171
1.36414	0.918513	1.27868
1.282	1.61268	1.71332
1.25851	1.4535	0.909133
1.27792	1.13441
1.19504	1.27966	1.03947
1.31503		1.13491
1.21669	1.40781	1.80936
1.4893	1.18606	1.16085
1.0569		1.45881
1.24674	0.934273	1.25198
1.2814	1.41946
1.31821	1.47489	1.16754
1.24911	1.91493
	0.847424	1.54102
1.29072	1.42921
1.09328	1.05428	1.20456
1.79645	1.71331	1.11324
1.26287	1.48817	1.25726
1.11714	0.959911	1.06512
1.82567	1.10331	1.10051
1.20163	1.47143	1.08769
1.361	1.06429	1.26377
	0.878266	1.2619
	1.81819	1.31678
1.26772	1.08485	1.18057
1.20052	1.09094	1.14485
1.30726	0.93323
1.20091	1.25445	1.0353
1.41955	1.08471	1.10109
1.39605	1.17523	1.15703
1.04134	1.2666	0.967626
1.24557	1.26582	1.0434
1.61476	1.00685
1.09172	1.23125
1.18277	1.17192	1.20704
1.16833		1.06714
1.87495	0.992732	1.07511
1.0692	0.89427	1.14832
1.44598	1.27509	1.28199
1.12223	0.970913	1.08097
1.25383	1.12795	1.40044
1.04316	1.31966	1.06122
0.993517	1.12413	1.01061
1.27528		1.11289
1.22383	1.38201	0.976231
1.07119	0.90234	1.518
	0.913817	1.06772
1.06874	1.00919	1.41484
1.40007	1.29793	1.42622
1.37988	1.04388	1.10406
1.50385	1.03289	1.2488
	1.57241	0.980539
1.09602	0.957514	1.23841
1.31853		0.943598
1.43603	1.06471	0.961122
1.31088	1.24813
1.21459	0.861464
1.79191	1.0825
1.4247	0.938524
	0.998187	1.28025
1.21022		1.16618
		1.0601
0.867965	1.30265	1.12068
0.949483	1.39773	1.10106
1.40649	1.31631
1.61897	0.979503	1.18845
1.43497	1.16799	1.24741
1.42368	1.20863	1.02962
1.43368	1.03049
2.08139	1.58196
1.27477	1.1773	1.12249
0.819546	1.16234	1.05636
0.963143		1.51229
0.852362	1.46066	1.01164
1.2349		1.38549
0.989438	1.83831	0.83729
1.4012	1.68771
1.68731	0.934565	1.08705
1.29344	1.32815	1.06553
1.00618	1.40506	1.12547
1.12607	1.85456	1.03754
1.29197	0.884686	0.899453
1.71474	1.15652	1.27608
	1.21495
2.08081		1.09467
1.06072	1.08674	1.25574
1.08999		1.08464
1.07632	0.955764	1.17773
1.67913	1.25732
1.42261	0.84273	0.972813
1.32028	1.02209	1.18739
0.882193		1.49237
1.49053	1.01972	0.989099
1.11716	0.910299	1.06399
1.68991	0.812032	1.03835
1.46205	0.972386
1.46984	1.02872	1.10183
1.3017	1.13403	1.34729
0.875152	1.29847	1.09393
1.32072	1.23614	1.17109
2.15594	1.01707
		0.889333
	1.5133	1.25571
1.00566	1.18808	1.2205
1.25538	1.33037	0.871609
1.21379	1.03708	1.06366
1.43405	1.42544	1.03773
	1.20019	1.17076
1.62166	1.08668	0.804951
1.0947		1.18321
1.51478	1.12624	1.24267
1.10224	1.39656	0.920015
1.30587	1.00714
1.3224	1.26699	1.03661
1.10386	1.44325	1.14178
0.938321	0.882493	1.00918
1.12726	1.0527	1.11235
1.53001	1.026	1.2151
1.18953	0.927432	1.16696
1.3263		1.15629
1.13352	0.912793	1.281
1.15165	1.19048	1.23249
1.24533	1.49407
1.51998	1.05602	1.00509
1.1479	0.927055	1.04916
1.1303	1.01603
1.22499	1.09622	1.16759
1.18497	1.35611
1.29242	1.12536	1.18995
1.60066	1.35561	1.32215
1.16904	1.24771	1.10876
1.36549	1.41358	1.53461
1.03955	1.06601
1.05568	1.10078	0.937443
1.08994	1.46242	1.17016
1.43218	1.06778	0.996214
1.08639	1.17568	1.11365
1.30385	1.05484
1.14367	1.17477	1.31284
1.22652	0.997553	1.15703
1.17282	1.14367	1.33611
0.816842	1.19313
1.32766	1.23713	0.973736
0.941448	0.972544	1.7728
	0.951738
	1.00545
1.33371	1.24651	1.06895
1.4611	1.2029	0.941307
1.1533	1.12971	1.19001
1.05331	1.0913	0.866106
1.06502	1.05494	0.997211
1.11764		1.03568
1.16527
1.10227		1.24502
1.08948	1.36771	0.89143
1.61424	1.05812	1.14389
1.07675	1.1469	0.888784
1.03232	1.14487	1.28346
1.13475	1.21198	1.03463
1.4522	1.09986	0.93835
1.63026	1.19631	1.29165
1.58695	1.23985	1.26366
1.623		1.17419
0.889574	1.00358	1.18934
0.815052	1.23992	1.25614
1.25296	0.909158	1.44372
1.50921	1.14849	1.17311
1.85244	1.19765	1.24463
0.994014		1.12817
1.58878	1.08643	1.1516
1.29012	1.10349	0.806315
1.46325	1.2027	1.30113
	1.31621	1.33657
0.805724		0.854815
1.24066	1.00046	1.03824
1.07456	1.15241	1.01725
1.05728
1.63707		1.16103
1.05907	1.28348	0.749634
1.41215	0.963303	1.19494
1.14257	1.11335	1.06853
1.11053		1.11415
1.20263	1.3894	1.22704
1.51536	0.945066	1.21947
1.34697	1.02928
1.04001		1.17813
	1.23746	1.29467
	1.15262
1.72559	1.46157	1.16019
0.999716	0.982127
1.19769	1.38731	1.01778
0.955397	1.31094
1.10644		1.02258
1.65051	0.991356	1.59522
1.04445	1.02218
1.25004	1.42944	1.04969
1.38057	1.32631	1.29182
2.23521		1.21255
1.39513	1.18353	1.174
1.34516	1.08492	1.04128
1.59114	0.965805	1.19992
1.12254	1.37657	1.14022
	1.15283	1.08527
0.94218	1.13159	1.01366
	1.09077
1.40839	1.08955	1.29262
1.20842	1.20839	1.00327
1.09853		1.24159
0.865732	1.34304	1.35896
	1.28066	1.12104
0.986669	0.966053	0.824486
1.08593	1.30814	1.25374
1.63515	1.1619	1.18729
1.28649	1.18023	1.33136
1.69322	1.03355	1.26448
	1.29924	0.995139
1.51765	1.24184	1.11055
1.32753	1.08896	1.144
0.943912	1.19967	1.15273
1.40537	0.947606	1.3148
1.23974	1.23188	1.40113
1.1416	1.0741	0.977466
1.1296	1.31126	0.868627
1.33661	1.09206	1.11882
1.04651	1.19153
0.943603	1.20763	1.22825
1.35654	1.08529	1.32916
1.49249	1.10777	1.57234
1.40528	1.14156	0.914647
1.6898	1.26654	1.12833
1.31577	1.13876	1.07725
1.33671	1.11848	0.996607
1.25969	1.00604	1.72614
1.18977	1.06518	1.3443
1.05546	1.16749
1.20763	1.13752	1.3569
		1.0972
1.42071		1.10363
1.455	0.827608	1.26738
1.89707	1.31391	1.39794
1.40412	0.983844	0.869272
1.33494	1.07628	1.5679
1.54637	1.01736	1.49176
1.50868	1.17966
1.35476	1.09014	1.08414
1.0425	1.5053	1.1944
1.28224	0.934197	1.01221
1.39503	1.30395	1.13852
1.47756	1.01206	1.32359
0.926015	1.28698	1.27149
	1.18751	0.744467
1.2874	1.26533	1.76146
1.15565	1.15489	1.2239
1.4082	1.07516	1.21749
1.16112	1.17375	1.14305
0.908561		1.13081
	1.8737	1.30813
0.99797	1.20416	0.988997
1.11243		1.16132
1.18289		1.33859
1.14798	1.23832	1.52103
1.29379		1.22159
1.13526	1.13082	1.78185
0.99456	1.30131	1.19576
0.948024	1.01905	1.18399
1.12816	0.9292	0.849758
0.932094	1.01524	1.12221
1.45475	0.90611	1.03043
1.31789	0.935806
1.16915	0.914427	0.947982
0.985784	1.36108	1.08556
2.11867	1.16775	1.24222
	1.09456	1.38691
0.963774	0.883692	1.09981
1.28662	1.1027	1.27193
0.913418		1.09795
1.34193	0.936451	1.1819
1.45072	1.21963	0.866429
1.0609	1.24984	1.01488
0.895761	1.42569	1.19518
	1.14903	1.06853
1.01797	0.870873	1.2194
1.46086	1.09501	1.04857
1.49776	0.849828	0.967628
1.04819	1.14601	1.48393
1.23454	0.981152	1.13941
1.18985	1.18203	1.63591
1.11727	1.18594	0.822351
1.34786	1.2816	1.11812
	0.8548	1.42825
1.03831	1.01006	1.34459
1.03581	0.933742	1.0935
0.899431	1.03354	1.05143
1.16813	1.18384	0.994
1.5337	1.11129	1.13283
1.70579	1.46962	0.828662
1.16265	1.06095
1.22394	1.13084	0.914393
1.64764	1.0939	1.00247
0.962199	1.21573	0.83113
	1.25866	1.04537
0.887189	1.44729	0.987326
2.24424	1.1767	1.47704
1.53881	1.21399	1.4976
1.25518	1.40118	1.5745
1.22715		1.13952
1.19642		1.31225
1.1804	1.51654	1.30769
1.21458	1.44075	1.10876
1.32692	1.19315	1.28428
1.23226	1.09967	1.18803
0.926081	1.23941	1.15451
0.953185	1.085	1.01054
2.26269	1.18342	1.31457
1.00904	1.16864
1.05573	1.05119	1.31767
1.55947	1.15436	0.792319
	0.912804	1.46162
0.9269	1.13575	1.17455
1.06313
1.16644	1.17498	1.16241
1.29387	1.77473	1.09459
0.93613	0.973412	1.25778
1.10835	1.19976	1.10753
1.09634	1.50067	1.02596
0.914389	1.17252
	1.03671	2.3429
	0.944617	1.18506
	1.20903	1.34775
1.11699	1.22278	1.10949
1.12559	1.01894	1.02462
1.12811	1.26758	1.21932
1.13274		0.841973
1.69476	1.26698	1.12999
1.12086	1.09509	1.07579
	1.08164	1.06834
1.03717	1.27737	1.02761
0.899768	1.16367	1.14618
2.19256		1.63858
1.02792		1.04392
0.941559		1.23058
1.12102	1.11813	1.39693
	1.27655	1.33542
1.1256	1.02148	1.35442
1.21363	1.19162	1.14366
1.0558	1.17752	1.12872
1.12588	1.12618	1.24197
1.30957	1.05473	1.29047
1.40199	1.28588	0.83627
2.13945	1.58175	1.05865
1.10273	1.12841	1.27144
1.30891	0.99775	1.50504
1.15718	1.26553	0.987143
1.21502	1.13066	0.951292
0.901405	1.19851	1.20421
1.30961	1.04591	1.29223
1.08354	1.13798	1.05608
1.12928	1.19341	0.985543
1.25931	0.960956	0.875697
1.08961	1.19078	0.967405
0.975144		0.905189
1.32425	1.21542	1.37622
1.3049	0.862242	1.43951
1.78568	1.11507
1.46864		0.86337
1.00499	1.25598	1.20007
0.886861	1.15139	1.13007
1.30933	1.12017	0.901466
1.76935	1.333	1.21141
0.968357	1.16634
1.07375	0.957491
0.973987	1.19397	1.0814
1.12343	1.15847	1.026
1.38831	1.59353
0.922095	0.832408	0.997838
1.09086	1.24782	1.22977
1.27324	1.51684	1.08561
1.2545	1.23146	0.772753
1.43159	1.18403	1.68127
1.21348	1.19152
1.12837	1.26793	1.04005
1.06511	1.00199	1.53303
1.41795	1.13908	1.24767
1.0226	1.26952	1.31899
1.29739	0.992476
1.15674	1.13258	1.09927
1.0926	1.11241	1.01341
1.32304	1.25183	1.54871
1.01202	1.18337	0.942584
1.5143	0.954498	1.25819
0.932605	1.08855
1.42765	1.31654	0.9926
	1.04444	0.907324
1.16412	1.03934
0.816465	1.22221	1.07869
1.77764	1.05938
0.95396	0.922727	1.33222
1.02156	1.17773
1.26552
1.25816	0.868394
1.16524	1.30887
	1.27886
0.933079	1.14904
	1.15349
1.156	1.30022
1.37047	1.16209
1.13092	1.39784
0.904655	1.43928
1.1361	0.98705
	1.19758
0.934148	1.04179
1.34893	1.103
1.01074	1.51181
	1.44833
1.27585	1.12344
1.02402	1.06774
0.843075	0.981298
1.81207	1.06217
1.03861	0.934697
1.376	1.40667
0.999324	1.00586
1.20398	0.9749
1.10525	1.04975
1.42121	1.44981
1.48064	1.31531
1.13558	1.31699
0.916525	1.28551
1.32292	0.980812
1.29272	1.31804
1.26785	0.913568
1.31912	1.52936
1.16371	1.18143
1.34579	1.09333
	0.909857
1.21216	1.32718
1.27134	1.02123
1.23472	1.4507
0.950603	1.14438
	1.18557
2.06853
1.23145	1.41075
	1.06008
1.22295	1.27096
1.0352	1.17003
1.45949	1.44157
1.87187	0.986887
1.33169	0.955765
1.23671	1.00355
	1.29378
1.83551	0.985206
1.23316
1.04891	1.20066
1.13593	1.02502
1.26339	1.06114
1.12285	1.18653
1.24227	1.03389
0.999339
1.39388	1.45636
1.25687	0.960457
1.00265
1.54309	1.21472
1.53122
1.31364	1.21239
1.24181	1.23925
	1.28516
1.24587
1.10457	0.988377
0.859764	1.24723
1.08409	1.30764
0.851989	0.945778
1.14423	1.43823
1.06881
0.952146	1.04671
0.907135	1.21272
0.86058	1.08914
1.3841
1.29189	0.961267
1.20662	0.955601
	1.00249
1.34583	1.11709
	1.32878
1.3876
1.33909	1.89455
1.05027	1.46101
2.18782	1.24271
1.20947
0.878406	1.09699
0.940297	1.25826
1.37459	1.23852
	1.14013
1.19933	1.14361
1.14926	1.43382
1.14052	1.14592
1.48557	1.45321
1.04628	1.20672
1.01299	0.875509
1.04076	1.09358
1.07682	1.28244
1.1522	1.03337
1.56309	1.37054
1.30104	0.985627
1.17542	1.21854
1.22557
0.965688	1.13458
1.13939	1.1574
	1.00274
1.2601
1.46486	1.3605
0.969354	1.20747
1.83287	1.17734
1.26593
0.980978	1.08264
1.15668	1.27702
1.20911	1.30071
1.3796	0.982935
	1.29563
1.05409	1.25683
0.816356	1.02059
1.20033
1.38706	1.05704
1.08973	1.39042
1.05941	1.69499
1.2233	1.19976
1.26529
1.3231	1.1526
1.02562	1.16101
1.19515	1.30926
1.38768	0.930925
1.29443	1.09668
1.06121	1.24928
[truncated: 50 more rows]

## Sheet: TFEB_ENDO 30min mk response 
TFEB_ENDO; 30min mk response
vehicle	125nM MK2206	1uM MK2206
	0.705867
1.02397	0.868866
1.17099		0.729096
	1.03108	0.88248
	0.684592	0.66172
0.840294	0.879525
0.991867	1.07141	0.721078
1.09952	1.04119
0.944405	1.00777	0.750668
0.968885	0.837924
0.913803	0.831329	0.815845
0.889997	0.827456	0.844972
0.87335	0.935812	0.660064
0.934132	0.990245	0.805835
0.823009	0.941178	0.661206
0.96977	0.888352	0.871999
	0.825451	0.873826
0.904362	0.943278	0.830029
	1.16262	0.782945
0.880439	0.880017	0.781409
0.906482	0.721096	0.690112
0.953826	0.994822	0.847835
0.878022	0.948455	1.02401
0.98783	0.831462	0.838454
0.802439	0.896614	0.813708
1.10294	0.978787	0.781409
0.853374	1.09803	0.973563
0.717288	0.938032	0.682353
0.978011	1.12278	0.72555
0.872666	1.02424	0.826166
0.94396	0.716396	0.764618
0.838075	0.9145	0.732507
0.888872	0.986069	0.65941
1.1046	0.876372	0.779244
1.01452	0.958038	0.650262
1.12594	0.845793	0.845292
0.848565	0.804316	0.898423
0.891282	0.837146	0.789165
0.915632	0.898754	0.677974
0.772487	0.945001	0.812694
1.13744	0.973783	0.751055
1.09546	0.753143
1.06998		0.922241
0.879973	0.91887	0.763647
0.949833	0.913243	0.722635
	0.943371	0.792513
0.686745	0.846943	0.812369
	0.736836
0.787135	1.08091	0.684018
0.748566	1.13013
	1.02006	0.842474
0.821755	1.10609	0.713704
0.90506	0.761601
0.783864	0.823053
0.806522	0.920831
0.858575	0.825002	1.10996
1.23393	1.01283	0.738446
0.660438	0.828948	0.867361
0.953493	0.990383
1.04317	0.741551
		0.987338
0.900245	0.906466	0.709638
0.772705		0.890965
0.696365	0.936832
0.711842	0.816945	0.68807
0.87271	0.903192
0.956519	0.981589	0.664709
1.1969	0.923445	0.825642
0.923333	0.961723	0.78244
0.901292	0.911081	0.817612
0.842777	0.900712
0.952933		0.823405
0.879111	0.923709	0.997494
0.812482	0.889826
1.03543	0.952486	1.05831
0.959849	0.982195	0.881755
0.744667	0.764368	0.788873
0.834134	1.00131	0.770104
1.10228	0.805369	0.684621
0.763599	0.809699	0.794603
0.750437	0.879324	0.755653
	0.810083	0.747646
	0.847388	0.868881
0.929192	0.822992	0.859286
0.962153	0.803108	0.734799
0.702142	0.941491	0.707393
1.01193	0.756014
0.788264	1.0698
	0.848293	0.708314
0.859265	1.04126	0.70321
1.04273	0.926604	0.937068
0.933701	0.711976	0.691375
0.908651	0.785496
0.918459	0.793632	0.766366
0.961687	1.03713
0.792412	0.864557	0.762066
1.02101	0.873171	0.839867
0.705885	1.10752	0.735193
0.854142	0.839425	0.762308
0.969667	0.928368	0.639249
0.822314	0.888185	0.809974
1.02863	1.12825	0.798007
1.11778	0.902706	0.739468
0.837497	0.743291	0.700343
0.962829	0.8313
1.0159		0.915109
0.830743		0.652262
0.784421	0.89161	0.878302
0.761134	0.839785	0.827487
0.993859	0.908778
0.927538	0.867384	0.632798
1.01485	1.10728	0.729923
1.03386	0.846973	0.852716
0.89178	0.766245	0.870548
1.03514	0.815441	0.748516
1.05158	1.0627	0.955749
	0.782037	0.73102
0.839084	0.861028	0.89116
0.759057	0.852759	0.922821
	0.811958	0.720061
0.993623	0.806532	0.815637
0.802052
1.07433		0.69343
0.834869	1.05254	0.732052
0.791768	0.897437	0.83744
0.745953	0.829649
	1.08821
0.929044	0.707059	0.690686
0.690429	0.836618
0.822277	0.914882	0.886739
0.917422	1.05349	0.909799
	1.12439	0.832363
0.814892	1.09934	0.903535
0.829643	0.754035	0.752418
1.06025
0.869927	0.909772	0.836796
0.817435	1.00379	0.699315
0.736486	0.874624	0.745293
0.916055		0.772878
0.919017	0.956566	0.819518
1.08327	0.756979	0.614688
		0.903988
0.786536	0.729782	1.03198
0.901759	0.862803	0.985044
0.911007	0.92828	0.845286
0.931592	0.816394
0.835242	0.783773	0.785689
0.974334	1.09638	0.80133
0.80067	0.803328	0.740852
0.825998	1.05434	0.822099
1.00766	0.780075
	1.07544	0.725233
0.731711	1.13019	0.83616
0.711362	0.919059
0.993253	0.683133	0.923854
	0.833073
1.05769	0.920222	0.914182
0.840746	0.742159	1.00917
0.805559	1.15223	0.854033
	0.729002	0.929005
0.970428		0.959607
0.934309	0.672117	0.910468
0.909029	1.18587	1.00737
1.01492	0.882938	0.850225
0.825574	0.794587	0.832388
0.678362	0.852685	0.95968
0.985356	0.916208	0.916201
0.884921	0.921741	0.825253
0.857511	1.03817	0.725727
1.12242	0.850335	0.693939
	0.656746	0.833838
1.01783	0.972038	0.929223
1.07711	0.892124	0.88565
0.966375	0.68172	0.898362
1.28221		0.839837
0.965931	0.788069	0.72148
0.857765	0.882418	0.73222
	0.814827	0.989312
0.907507	0.754299	0.791578
0.995752	0.820832
1.14771	0.989585	0.768024
0.939719		1.08887
0.90295	1.14096	0.963757
0.747109	0.903299	0.721975
0.853246		0.92945
0.76293	0.940865	0.822058
1.11069	0.764341	0.748898
1.13737	0.776083	0.75614
0.940806	0.845899	0.888994
0.890546	0.919312
0.939356	0.94348	0.908971
0.996814	0.963424	0.878577
0.894737	0.888246	0.824153
1.00525	0.934937	0.924059
0.952364		0.81761
0.859327	0.663926	0.822342
0.963105	0.912628	0.655586
1.106	0.921371
1.26438	0.820238	0.752558
0.929131	0.894155	0.803523
0.89008	0.793953	0.82605
1.06288	0.682929	0.917312
0.867995	0.844806	0.938766
0.765721	1.05022
0.828379	0.87936
1.09215	0.89367	0.878572
0.919282	0.792021	0.905542
0.834021	0.920282	0.807033
0.806692	0.719454	0.785669
0.884674	0.731269	0.974909
0.753716	0.869885	0.861636
0.854277	0.946214	0.885763
0.84739	1.07516	0.796326
0.860464	1.0822	1.022
0.927353	0.927854	0.916163
0.999679	0.66777	0.745213
0.710242	0.927405	0.912834
0.864924	0.820171	0.747337
0.779542	0.703504	0.929953
	0.827159	0.820177
0.905805	0.831812	0.786954
0.948613	0.774901	0.895445
1.22351	0.756038	0.965645
0.878929	1.00794	0.831354
1.05227	0.732993	0.808952
0.921957		0.848685
	0.964884
0.933178	0.839605	0.904494
0.993639	0.960266	0.654384
1.11142	1.04854	0.854734
0.897408	1.03671	0.885996
0.797097	1.01462	0.881791
0.817489	0.856595	1.08647
0.956588	0.831174	0.95339
0.921793	0.926643	0.872721
1.09479	0.794242	0.959317
0.874211	0.98975	1.1008
0.947633	0.835926	0.696434
1.16162	0.825081	0.855829
0.946895	0.762558	0.8353
0.805559	0.90761	0.689531
0.687048	0.988909	0.712459
0.968885	0.713517	0.754853
0.92511	1.07599	0.799535
0.902109	0.78187
0.984789	0.859184
0.893789	0.851613
1.01322	0.812323	0.84863
0.814815	0.780425	0.871448
0.849019	0.940668	0.744227
0.951298	0.968218	1.05027
0.811196	0.694206	0.837715
0.970037		0.830284
0.766304	0.879045	0.920894
0.818787	0.740362	0.856611
	0.821744	0.916095
1.04648	0.868689
0.853779	0.959844
0.713744	0.732106	0.794835
1.00949	0.770802	0.930131
0.904901		0.92088
0.894589	0.943472	0.81567
1.04084	0.790308	0.818898
0.711171	0.914646	0.731206
1.07261	0.845939	0.862226
0.74607	0.689168	0.673064
0.85131	1.17373
1.099	1.02953	0.695548
0.850197		0.776384
0.74341	0.904871	0.889818
1.11654	1.18686	0.785059
1.16759	0.85775	0.828314
0.869291	0.916292	0.854909
0.878368	0.763697	0.976104
0.76778	0.986242	0.749468
0.801751		0.706107
1.00979	0.772684	0.79644
1.10048	0.922365	1.04136
1.10923	0.800939	0.849162
0.911661	0.729562	0.618433
1.11869	0.906007	0.922296
0.753946	0.836071	0.763864
0.727269	0.905852	0.720033
0.919532	0.758675	0.733594
0.978728	0.942384	0.763068
0.992269	0.757102	0.816658
1.0885	1.03533	0.891115
0.814842	0.717118	0.950531
0.864736	0.760185	0.958054
0.944944	1.0609	0.79592
0.981177	1.02412	0.860079
0.943889	0.708977	0.715267
1.03029	0.769308	0.878355
0.790961	0.783028	0.912266
0.880178	0.738475	0.813015
0.812981	0.80258	0.741248
1.03825	0.804865	0.93752
0.879465	0.734863	0.67092
1.03002		0.700558
1.05301	0.948021	0.85881
0.820454	1.13744	0.678501
0.994736	0.875298	0.715768
0.914518	1.12067	0.868081
0.882185	0.720013	1.001
1.13677		0.859822
0.73319		0.73591
0.935938	0.783408	0.959676
1.05049	0.664669	0.651983
0.90249	0.953024	0.639541
0.913032
0.974869	0.679624	0.870058
0.801531	1.05428	0.739916
0.995347	0.726711	0.848931
1.30713	0.776546
0.999378	0.906443	0.766986
1.05631	0.961026	0.849246
1.22735	0.842985
0.954787		0.771366
1.14421	0.966768	0.762087
0.980124	0.735829	0.633161
0.989801	0.716856	0.999372
0.834586		0.989154
0.937375	0.866539
0.890936	0.815753	0.75281
0.986568	1.11083	0.655933
1.02436		0.88798
0.961744	0.811329	0.725907
1.0327	1.0304	0.943413
0.799851	0.774872	0.78034
	0.711339	0.679047
0.950146	1.00523	0.848965
1.09245	1.0372	0.765126
0.828536	0.947301
0.975022	0.715189	0.854958
1.05528	0.7911	0.715134
0.740079	0.961779
	0.848719	0.884082
0.821444	1.00412	0.872809
0.91019	1.18398
1.07681	0.74036
0.653948	1.01615	0.716104
1.28086	1.05788	0.896441
0.852076	1.00977	0.80498
0.842355	1.01696	0.676228
	0.773854	0.965947
	0.792409	0.887682
0.938698		0.696844
0.656884	0.824026	0.697383
1.00821		0.624482
0.650195	0.918957	0.747957
0.912969	1.03282	0.773015
0.864516	0.736463	0.872415
0.923198		0.763707
0.828053	0.675315	0.757595
0.852913		1.00626
0.656366	0.660847	0.612087
1.07212	0.842525	0.861235
0.710748	0.809349	0.697049
0.866461	1.02106	0.892698
1.00358	0.976628	0.663928
0.692664	0.941999
1.01		0.722052
0.996294	1.05117	0.841414
1.24514	0.870005	0.69867
0.767199	0.990026	0.829165
1.02814	0.936994	0.773299
0.840636	0.856373	0.778433
0.787226	0.868029	0.821684
1.13054	0.815908
1.1069	0.776369	0.877265
0.973811	0.773647	1.01469
0.840033	0.833277	0.773728
0.831671	0.941866	0.858227
0.993592	0.70069
0.947367	1.10725
1.04542	0.81624	0.81057
0.797149	0.744639	0.83442
0.826201	1.06058	0.996781
1.02837	0.941549
0.789693	0.758989	0.973392
		0.850284
0.745924	0.905942	1.09256
0.684584	0.885355	0.711463
0.861338	0.978194	0.909501
0.657292	0.902119
0.894093		0.807775
0.899514	0.953883	0.776552
0.744752	0.821016
0.970963	0.751961	0.641074
0.841978	0.804458	0.933248
0.817198	0.770463	1.08293
0.898985	0.905504	0.796596
0.777001	0.913907	0.792016
0.815527	0.91665
0.924429		0.76072
	0.963557	0.660221
0.762472	0.884085	0.81004
1.12692	0.919317	0.720345
0.664268		0.948672
0.997015	1.13783	0.872905
0.90085	0.775808	0.830302
0.936508	0.914213	0.651917
0.990348	0.821558	0.802064
1.02293	0.848938	0.767555
0.787086	0.813068	0.606597
0.862151	0.929973	0.720242
0.687493		0.627096
0.85384	0.831288	1.04388
0.806485	0.742101
0.649028		0.881534
1.01509	0.763901
0.972191	0.892077	0.759746
0.696601	0.818127	0.789048
0.742581	0.951505	0.894402
	0.99123	0.745816
0.643904	0.765255	0.683676
0.868985	0.703531	0.743403
0.907976	0.930471	0.642251
0.862391	1.08756	0.727165
0.830452	0.849543	0.695119
	0.807533	0.712574
1.11582	0.747981	0.783836
1.01584		0.664681
0.652062	0.755332	0.675141
1.07358	0.787798	0.842261
0.853367	0.96698	0.86184
0.870613	0.742579	0.703096
1.03859	0.886161	0.902129
0.80878	0.943345	0.671674
0.99435	1.08167	0.700046
0.685034	0.824319	0.809181
0.77763	0.844849	0.7237
0.64768	0.69108	0.656707
1.01633	0.904604	0.792714
0.909422		0.749911
0.707461	1.0337	0.818634
	1.14553	0.832976
0.705198	0.995782
0.996357	0.949644	0.678076
	0.822881	0.74051
1.1554		0.927483
0.909786	0.755779	0.829719
1.14294	0.822277	0.737173
0.868657	0.786643	0.71835
0.903438	0.880313	0.907491
0.836495	0.824748
0.927381	0.720961	0.880926
0.694304	0.762476	0.82864
0.909889	1.01597	0.803326
0.78745	0.676331	0.761857
0.990571		1.02684
0.770881	0.838365	0.641927
	0.846609
0.964903	0.673309	0.878213
	0.982166	0.985603
0.912185	0.797186	0.703411
1.1548	0.842201	0.75933
	0.741964	0.690496
0.911788	0.780464	0.794857
	0.734249	0.757189
0.819181	0.793982	0.854399
1.15612	0.70236	0.894028
0.765886	0.968559	1.02492
0.775801	0.697572	0.755958
0.832415	0.999133	0.70528
0.694876	1.10257	0.803741
0.786618	0.703845	0.838962
0.912466	0.697611	0.862393
	0.725164	0.839539
0.989877	0.814914	0.771565
	0.803982	0.879911
1.29874	0.885542	0.837603
0.854873	0.777748	0.632315
0.797644	0.88415	0.936632
0.82048	0.854207	0.759152
0.909404	0.888561	0.780586
		0.964696
0.714591	0.78617	0.772176
0.878425	0.825236	0.783366
0.649041	0.869879	0.740183
0.685608	0.772403	0.710194
0.916084	0.755789	0.623257
	1.16737	0.660253
0.842503	0.896723	0.640539
0.981607		0.609555
	0.81115
0.887966		0.70853
	0.716185	0.727712
0.814303	0.737939	0.943338
0.80722		0.902115
0.779023	0.887699	0.73524
0.83612	0.877022	0.705037
1.06931	0.769381	0.954525
1.17793	0.688999	1.06528
0.724374	1.09128	0.948734
0.857006	1.04002	0.997473
1.01998		0.959729
0.756267	0.889992	0.618744
0.944992	0.903275	0.835691
0.790267	0.932163	0.818762
0.854118	0.952945	0.853365
0.867208		0.778244
	0.810319	0.698718
0.723329	0.953503	0.621759
	0.760466	0.898677
0.794433	1.00198	0.737427
0.789797	1.09082	0.851836
0.893018	0.872815	0.658434
0.899664	0.775104	0.812407
0.874252	0.923545	0.886193
0.65575	0.895825	0.713844
1.05838	0.980913	0.992301
0.735978	1.03215	0.71434
1.03111	0.823983	0.710901
1.07171	0.904989	0.969414
	0.821883	0.917246
1.03442	0.980749	0.813842
0.872991	0.890848
1.1173	0.737863
0.79972	0.733694	0.848657
0.762885	0.747576	0.703543
0.82477	0.953063	0.869215
0.751841	0.820448	0.803304
0.862186	0.859164	0.666531
0.800847	0.907256	0.785217
0.96187	0.931347	0.743456
0.865835	0.800007	0.666626
0.978666	0.950309	0.713768
0.790954		0.644945
1.04296	0.814012	0.751258
1.15046	0.820327	0.736599
1.08872	0.859114	0.864346
0.904155	1.04687	0.664401
0.911026	0.959376
0.84887	0.895271	0.769886
0.905262	1.03054	0.760603
0.941754	0.947771	0.735704
0.982964	0.679548	0.701955
1.06752	0.927051	0.721848
0.838444	0.943852	0.7661
0.880717	0.913843	0.683494
0.84797	0.764103	0.831793
0.786473	0.791101	0.81952
0.96622	0.934456	0.759259
0.767725		0.922756
0.977854	1.04321	0.789569
0.846318	1.13319	0.645687
1.08641	0.779279	0.780679
	0.820128	0.772856
0.951495	0.854499	0.785168
0.9775	0.804323	0.773095
0.764728	0.954348	0.701737
0.87039	0.793236	0.878292
	0.990769	0.751224
1.31635	1.02974	0.617095
0.985772	0.860652	0.904738
0.968848	1.08826	0.895022
0.751871	0.797915	0.683233
0.799658	0.729538	0.781411
0.894541	0.882688	0.683137
1.03674		0.836553
	0.869187	0.760208
0.976093		0.818812
0.86763	0.821314	0.743079
0.993867	0.735514	0.803245
	0.760036	0.787858
0.968092	1.17169	0.999355
0.904938	0.679171	0.846562
0.951782	0.842229	0.81167
0.810621	0.772199	0.870688
0.9742	0.830256	0.684398
0.671891		0.868633
0.880655	0.816913	0.641996
0.95746		0.902031
1.02558	1.11222	0.814168
0.85527	1.11783	0.9192
	1.03087	0.809418
0.730075	0.888811	0.862563
0.893719		0.892168
0.980012	0.862693	0.710039
1.00234	0.939037	0.82503
0.881668	0.936838	0.667021
0.753738		0.844865
0.872096	0.939195	0.723802
	0.840808	0.893242
1.04444	0.688567
0.867445	0.646954	0.719366
0.939034	0.889321	0.826781
1.26915	1.08596	0.859453
0.760253		0.763805
0.882712	0.884504	0.740771
1.01432	0.908461	0.764148
0.877977	0.898436	0.7773
1.0147	0.724202	0.643864
1.04728	0.728122	0.659818
0.890078	0.696218	0.856678
1.08129	0.854854	0.649249
0.960469	0.763804	1.06539
0.865377	0.939879	0.747011
0.817939	1.06625	0.804836
1.1794		0.759696
0.824817	0.789471	0.649883
0.854459	0.822477	0.890791
0.970522	0.793129	0.817991
		0.866165
1.0819	1.1387	0.882429
0.765227	0.792643	0.713707
0.92083	0.659702	0.86755
0.923313	0.692092	0.721966
0.881103	0.836796	0.771603
		1.00444
1.01114	0.660151	0.811111
	0.839874	0.788544
0.857842	0.975183	0.745038
0.867647	0.893154	0.645173
0.964908
1.05789
0.837901		0.657902
0.890141	0.708839	1.05252
1.04979	1.08646	1.09092
0.861398	0.800931	0.866057
0.986975	0.894911	0.650247
0.847071	0.898812	0.780704
0.945178	0.820354	0.771483
0.925545	0.884888	0.684187
0.920894	0.916975	0.768704
0.907146	0.888218	0.774862
0.917936	0.687786	0.738762
0.987793	0.806048	0.719215
0.933805	1.03019	0.933471
0.878019	0.938906	0.669949
0.909707	0.736987	0.666867
1.08125	0.8893
1.10708	0.976987	0.742179
1.00205	0.71508	0.953607
0.883941	0.861973	0.885147
0.788354	0.85974	0.84013
1.04445	0.793418	0.811075
0.944892	0.799769
1.10059		0.7915
1.04817	0.944856	0.762333
0.996931	0.841561	0.611027
1.0444	0.835571
1.09283	0.869749	0.610148
0.781682	0.812778
1.11181	0.855056
0.948617	0.833881	0.928968
0.819808	0.974191	0.810221
1.0408	1.0005	0.662417
0.991719	0.723766	0.861173
0.757819	0.899735	1.02346
1.04294		1.04194
0.796624	0.686046	0.929256
1.23033		0.815914
0.933055	0.90639
	0.951524	0.8633
1.04922	0.984089	0.950987
0.837203	0.84214	1.05682
0.747401	0.885085	1.00103
0.754603	1.1109	0.906376
0.820663	0.748768	0.837292
0.904755	0.910778	0.878566
0.986027		0.952142
0.922239	0.860593	0.785935
0.876166	1.05326	0.734877
0.903626	0.798577	1.00849
0.931183	1.0536
0.961564	0.854702	0.698237
0.933809	0.802051	0.931648
1.01866	0.949848	0.761785
1.18355	0.861437	0.641328
1.06048	0.675111	0.876219
0.872689	1.03198	1.07671
0.891793	0.829923	0.967291
0.906952	0.978755	0.738364
1.20211	0.842765	0.968161
0.850157	0.841732
	0.921975
0.980548	0.739466	0.86641
0.908256	1.11658	0.857793
0.712109	0.804866	0.796285
0.839175
0.8492	1.0168	0.892261
	0.799943	0.854731
1.02542	0.875575	0.878889
1.13009	0.878116	0.731508
	0.83809	0.866697
0.734429	0.845239	0.870943
0.964253	0.718792
0.89752	0.766132	0.641848
	0.923031	0.925229
0.969188	0.743245	1.13436
0.929791	0.807053	0.851367
0.951144	0.912111	0.829706
1.07905	0.911468	0.911687
0.844233	0.688075	0.807827
0.726266	0.786241	0.910876
0.807068	0.911276	0.817305
1.28045	0.968175	0.908682
0.911171	1.09892	0.952237
0.777607	0.865973	0.90389
0.71426	0.828605	0.886697
0.88281	0.894913
0.698354	0.72788	0.914129
0.911447	0.858773	0.890119
0.841491	0.876359	0.895959
0.844667	0.905099	0.801675
	1.02814	0.765876
1.02209	0.911702	0.819509
1.01105	0.937213	0.989051
	0.901022	0.893465
0.868959	0.813761	0.716927
0.982644	0.921945	0.961683
0.866153		0.834798
1.04375	0.858355	0.738558
	0.791014	0.92075
0.855442	0.970868
	1.02795	0.752395
0.763033	0.737372	0.760164
0.775617	0.847204	0.858038
	0.888304	0.969636
0.935503	0.971375	0.728785
0.887568	0.901754
	0.865137
0.871884		1.09152
0.956632	0.957758	0.845629
0.712094	0.883835	0.852178
1.00073	0.917303	0.790758
0.929222	0.8731	1.11591
0.899733	1.05514	0.866278
0.900367	0.859812	0.854024
0.986999	0.845526	0.868022
0.797289	0.88259
	1.02302	0.836562
0.76145	0.899889	0.836979
0.851426	0.794768	0.721319
0.873303	0.894888	0.903793
0.805242		0.912908
0.792289	0.837129	0.727163
0.947306	0.695659	1.08382
0.901422	0.865757	0.967582
0.907925	0.726695	0.96948
0.814015	0.92962	0.696514
0.727506	0.901882	0.851585
0.807227	0.86402	0.867165
0.776954	0.893834	0.941839
0.80955		0.770755
0.758801		0.974609
1.14139	0.890193	0.859244
0.857545	0.937434
0.788041	0.920534
0.868024	0.775313	0.805561
0.852849	1.01914	1.10202
0.759126	0.972862	0.910534
	0.741782	0.886107
0.882022	0.855241	0.830785
0.871764	0.73325	0.676554
0.713406	0.723535	1.10753
0.957375	1.0614	0.929809
0.828897	0.96512	0.846748
1.20472	1.04807	1.06461
0.832655		0.999578
1.14124	0.797296	0.890633
	0.846788	0.902299
0.819053	0.726078	0.858858
0.798019	0.993816	0.85796
0.901214	0.74943	0.925948
0.825853	0.692205	1.0377
0.80439	0.889216
0.823321	0.709201	0.681919
0.912111	0.83425	0.847128
0.852326	0.832173	0.895615
0.863043	0.774801	0.73791
0.67918	0.750323	0.928767
0.830914	1.00894	0.89386
0.93333	0.675959	0.920291
	0.790622	0.837166
0.848899	1.00606	0.674124
0.724246		0.841387
0.754042	0.926384	0.782904
0.855939	0.776213	1.05673
0.767483	0.894864	0.8871
		0.88226
0.891576	0.763131	0.935596
1.05505		0.955947
0.945095	0.900565	0.89457
0.971844		0.945268
1.04588	0.817559	0.84534
0.740591	0.681129	0.917559
0.844815	0.92732	0.711306
1.07857	1.01109	0.646871
0.841755		0.861894
0.901874	0.826383	0.838561
	0.949891	0.93102
0.694681	0.914774	0.890862
0.74674		0.710866
0.726435		0.988825
1.06473	0.943611	0.850097
1.13232	0.850626	0.716257
	0.90514	0.961542
0.907835	0.891131	0.739469
0.991526	0.844493	0.805263
0.861644	0.950331	0.868935
	0.953799	0.669485
	0.847997
	0.913366	0.777531
0.86999	1.03782	1.15562
0.761445	1.01412	0.859281
0.868367	0.847186	0.841657
0.992969	0.873664	0.850043
0.892256		0.963588
0.963591	0.823812	0.84084
0.813513	0.949423	0.754659
0.873416	0.950717	0.924383
	0.929939	0.7726
0.958432	0.93091	0.743769
0.849239	0.80463	0.90933
0.986597	0.835843	0.74112
0.785633	0.885438	0.953184
	0.81133
0.747445	0.921761	0.824318
0.738106	0.845409
0.770108	0.982659	1.10533
0.757971	0.810593	1.00682
0.943045	0.830132	0.663975
0.897471	0.949075
0.764365	0.898605	0.830729
1.00466	0.87626	0.715993
0.894839	0.920327
0.74996	0.83426	0.716666
0.928508	1.05007	0.829156
0.875155	0.733484	0.701747
	0.77775	0.748006
0.769446		0.839859
0.90051	0.741295	0.969385
0.820828	1.08188
0.964979	0.966925
0.849717	0.914958	0.93099
1.13562	0.763863	0.840677
1.13771	0.889131	0.727216
0.720335	0.909812
0.979277	0.887739	0.797452
1.07637	0.892737
1.14464	0.736178
1.1525	0.881744	0.900397
0.858292	0.67123	0.94372
0.88113		0.850664
1.04861	0.916701	0.969583
0.824198	0.898111
0.883691
0.753499	0.935492
0.816163	0.968953	0.949075
0.761256	0.901585	0.848129
0.832349	0.884989	0.889827
1.12403	0.92613	0.987606
0.818472	1.01921	0.8137
1.02465	0.823386	0.882762
0.752282	0.770242	0.781377
0.946863	0.867776	0.850648
0.868386	0.776504	0.907603
0.87439	0.858283	0.846212
0.935541	0.770843	0.897497
1.2289	1.08377	0.976466
0.842915	0.841807	0.7651
0.754319	0.75778	1.03996
1.02003	1.05851	0.924949
1.08614	0.83977	0.677903
0.978282		0.822162
1.20803	0.86121	1.05239
0.714418	0.785537	0.769763
0.772476	0.766661	0.89018
0.982331	0.76918	0.748405
	0.801049	0.683963
1.05841	0.766348	0.854032
0.796713	0.809495	0.905618
1.14922	0.727721	0.945113
0.846051	0.895686	0.818917
0.876381	0.938833	0.697789
	0.945475	0.936301
0.87665	0.852914
0.850541	0.951559	0.982303
0.804966	0.76265	1.04766
0.736219	0.680704	0.827406
0.715203		0.80808
1.01066	1.02367	0.90888
0.735216	0.897277	1.05577
	0.714386	0.869325
1.16722	0.825303	0.78143
0.954248	0.788614	0.722075
0.990172	0.87238
	0.808176
	1.00532	0.879534
0.879306	1.13894	1.14776
0.907588		0.908439
0.952255	1.05454	0.690459
0.869474		0.690428
1.12146	0.936032	0.79981
1.00601	0.845274	0.718354
1.20724	0.757652	0.916638
		0.944478
0.939087	0.723707	0.900471
1.05324	0.780674	0.870756
0.861578	0.763032	0.707586
0.823237	0.877977	0.709122
1.0645	0.86227	0.75072
0.938483	0.869204	0.859041
0.907139	0.852347	1.16435
0.713689	0.690355	0.954113
0.893546	0.759671	0.84496
0.899918		0.836596
	0.981988	0.903954
0.915648	0.83804	0.937786
1.10455	0.976539	0.780238
0.789193	0.795069	0.685189
0.909087	0.928755	0.875862
1.04073		0.902535
1.13086		0.81047
0.850373	0.756332	0.947518
0.917509		0.843236
0.853278	0.852737
0.976174	1.08263	0.749171
0.876239	0.796498	0.910453
0.988844	0.948797	0.812013
0.76231	1.05838	1.05874
0.820736	0.820362	0.999558
0.895606	0.707882
0.809415	0.985516
0.875541	0.885623	0.918071
0.846066	0.878661	0.768375
	0.753203	0.92573
0.967782	0.704326	0.92481
0.978652	0.831848	0.898086
0.909723	0.997536	0.91431
0.770177	0.904152	0.990438
0.939384	0.735027	0.887242
0.983845	0.729008	0.804684
1.07428	0.858644	0.864442
0.912908	0.869758	0.877999
0.854528	0.904126	0.779312
1.04971	0.870638	0.677626
	1.11633	1.13895
0.96374	0.875271	0.670564
	0.743566	0.950963
0.911858	0.748331	0.643106
0.831141	0.976196	0.921685
1.01208	0.736717	0.837071
0.893243	0.944905	1.15367
0.823022	0.852959	0.986501
0.811117	0.676204	0.971768
0.808515	0.968583	0.888199
0.982485	0.875663	1.17881
0.955651	0.803578	0.999088
0.752244	0.985828	0.920605
0.90731	0.804146
0.783178	0.899712	0.732577
1.04796	0.787757	0.942691
0.912202	0.670929	1.01682
0.959572	1.04453	0.911542
0.852013	0.997787	0.911104
0.814142	0.94052	0.757272
1.07641	0.889069	0.912153
0.902437	0.869618	0.706614
0.968895	0.847256	0.903572
0.866018	0.733201	0.855975
0.87725	0.882751	0.698207
		0.806953
1.00874	1.03714
0.914859	0.72518	0.931241
0.860423	0.682068	0.801358
0.715007		0.814855
0.828794	0.800576	0.942039
		0.866608
0.938644	1.04989	0.931591
0.807155	1.08383	0.843157
0.950968	0.750425	0.791139
0.951681	0.874141	1.16491
0.71412	1.09571	0.65029
0.898677	1.02965	1.00598
0.828713	0.691031	0.953907
0.785378	0.778619	0.954356
0.926921
	0.778728	0.642664
	1.02957	0.731932
0.911767	0.972005	0.977254
0.963017	1.14511	0.791248
1.02444	1.03348	0.769478
0.870339	0.913083
0.987735	0.899719	1.04924
1.07566	0.749151	0.873904
0.965167	0.76092	1.02146
1.09197	0.751252	0.786506
0.823576	0.963386	0.812695
1.00931	0.9312	1.01975
0.922	0.849039	0.816673
0.882609	0.92215	0.757372
0.878208	0.900199	0.909707
0.816823	0.771916	0.950006
0.946173	0.856312	0.908089
1.00176	0.891404	0.827133
1.01944		0.771586
0.903777	0.875673	0.913545
0.899782	0.727233	0.87771
	0.876629	0.812458
0.779041	0.958562
0.849478		0.84041
1.1026	0.804211	0.848886
1.02407	0.901302	0.931886
1.17582	0.760696
	0.819336	0.8374
0.782242	0.947936	0.85924
0.954161		0.796488
0.994344	1.01214
	0.935582	0.920185
0.818086	0.782553	0.689931
	0.976274	0.952055
0.73212	0.833898	1.00829
0.990931	0.898752	0.86143
	1.02774	0.832571
	0.886333	0.904521
1.00215	0.884094
1.12565
1.07829	0.904269	0.919698
0.97697	0.848966	0.740008
0.866213		0.683568
0.806208	0.858711	0.771581
0.869057	0.83077	1.11099
0.891311	0.978433	0.915769
	0.778147	0.975389
0.825878	0.866763	1.0614
0.857171	0.986367	0.882027
1.05488	0.794108	0.893724
	0.870497	1.01761
0.96893	0.910594
0.893999	0.988118	0.846044
0.724458	0.884082	0.891537
	0.954331	0.797066
1.03707	0.882473	0.827843
0.737503		0.836679
0.762798
0.816042	0.771766	0.978525
	0.876769	0.88569
0.935768	1.01863	1.03322
	0.734423
1.11243	0.915966	0.817984
0.965243	0.914096
1.03477	0.921158
1.17375	0.903191	0.990244
1.14236	0.736718	0.870392
0.731748	0.812078	1.01357
0.776112	1.00239
0.95471	0.927992
0.949991	0.976309	0.979377
1.19656	0.868958	0.724777
0.746326	0.990941	0.849177
0.975515	0.803577	0.70557
0.995936	0.969789	0.828575
0.959259	0.777626	0.73115
0.82715	0.69422	0.720658
0.959489	0.818661	0.69724
0.956559	0.82403
0.808251	0.886986	0.865397
1.15355	0.858313	0.799763
0.929257	0.999526	0.829184
0.723182	0.903998	0.766271
0.840635	0.964301	0.639787
0.837282	0.905534	0.932811
0.981	0.733589
0.919373	0.917384	0.977443
0.835145	0.99605	0.773831
0.82706	0.886065	0.881943
1.04605		0.939646
0.844789	0.894703
0.926671	0.827619	0.706402
0.848462	0.945614	0.841413
0.749252	0.984872
1.04279	0.889113
0.803911	0.999882	0.845024
	0.996078
1.17299	0.873836
0.756295	1.04155	0.858865
0.883004	0.932832	0.664835
0.873839	0.973512	0.957422
0.968459	1.00646
0.785337	0.845291	0.988761
	0.836903
0.787174	1.00582	0.837308
0.769593	0.917462	0.846823
0.892624	0.801938
0.837175	0.984998	0.956063
0.939781	0.933881	1.05747
	0.981406	0.789254
0.908468	0.716615	0.753894
0.88378	1.05132	0.913431
0.815235		1.07009
0.86154	0.959599	1.0171
1.0443	0.89748	0.82867
0.881961	0.891904	0.94978
	0.889083	0.928172
1.03761	0.90279	1.00859
0.838629	0.875199	0.878423
0.911422		0.977496
1.03498	0.943784	0.899476
0.846654	0.926655	0.871388
	0.897968	0.972954
0.999633	0.943808	0.894059
0.959088	0.917501	0.934579
0.860753	0.71001	1.01044
0.852996	0.840575	0.859556
0.811297	0.859299	0.861765
1.15883	0.844515	0.895163
1.0143	0.811554	0.813097
	0.957055
0.855874	0.903711	0.80652
0.859312	1.03941	0.945395
1.05959	0.808256	0.721727
0.777868	0.825348	0.981596
	0.927703	1.00836
1.01344	0.943057	0.97386
0.833425	1.02478	0.722947
0.875814	0.828174	0.837164
0.951351	0.783048	1.03536
0.941375	1.00742	1.05781
0.839186	0.676015
	0.771085	0.795058
0.99372		0.998711
0.904676	0.709586	0.687069
1.16237	0.932517	0.730356
0.976038	1.06791
1.03803
	0.990934	0.774944
0.994268	1.01987	0.911785
0.906494	0.84176	0.866845
1.18802	0.818751	0.801172
0.942734	0.820776
	0.981633	0.826396
0.743729	0.934733	0.756129
0.713392	0.894099	0.865735
1.0706	0.854107	1.04862
0.89603	0.787708	0.935712
0.867772	0.787496	0.927574
0.824464		1.13749
0.8333	1.08291	0.856004
1.03319	0.983691	1.11796
0.81863	0.801106	0.756862
	1.04
0.813631	0.784957	0.753565
1.07245	0.921594	0.866026
1.05683		0.772376
0.724318	0.964103	0.845353
1.08935	0.951426	0.744254
0.824809	0.811791	0.961593
1.08679	0.857349	0.775543
1.06718	0.764844	0.858256
0.979676	0.8955	0.924638
0.924539	0.977194	1.03839
	0.83496
0.821402	0.851555	0.78296
1.00422	0.977228
0.858132	0.784921	0.942875
0.981536	0.970139	1.08699
1.01766	1.01998	0.829706
0.981439		0.891255
1.09344	0.909035	1.0997
0.913246	0.673861	0.907141
1.2289	0.8391	1.17575
0.828436	0.88462	0.825351
0.941713	0.842209	0.713548
0.884696	1.1301	0.747365
	0.744416	0.881664
0.952024	1.00443	0.921143
0.78667	0.705098	0.671293
0.858046	0.884979
0.985522	0.901116	0.889724
0.829052	0.873582	1.19762
1.0012	0.895548	0.850693
0.905315	0.879261	0.760178
0.910684	0.950704	1.10327
0.904956	0.804239	0.90298
		0.822698
0.885375	0.727952	0.915921
0.974785	0.999178	0.934492
1.0271	0.880267	0.897656
	1.01778	0.766716
0.711701	0.91069	0.927484
0.795552	0.673589	0.9308
		0.876025
1.08826	0.759688	0.75199
0.89461	0.730844	0.836765
1.04317		1.00521
1.001	0.95566	0.854155
0.846385	0.914463	0.884362
0.83214	0.947539	0.694373
0.893068		0.766888
0.935152		1.04135
0.963411		0.884916
0.85795	0.78857	0.965784
0.949504	0.815492	0.894905
0.893036	0.97312	0.905824
0.820771	0.825445	0.767764
0.810142	0.827849	0.989001
0.753477	0.833103	0.993731
0.834956	0.756942	0.940402
1.164	0.837173	0.813979
0.851967	0.735017	0.657116
0.942238	0.94589	0.84482
	1.07925	0.755664
0.885097	0.830001	1.15226
0.921621	0.92278	0.918681
0.932159	0.748265	0.957328
0.911211		0.888413
	0.756663	0.643609
0.946033	0.754302	0.849295
1.01212	0.896001	0.870193
0.943302	0.716866	0.793834
0.939905	0.850979	0.825756
1.06648	0.913866	0.911736
1.11818	0.678553	0.834116
0.977857	0.925934	0.944856
0.872993	0.718359	0.743789
1.14357	0.797336	0.821864
0.934429	0.693727	0.844461
0.892841	0.826495	0.828881
0.873116	0.819821	0.752809
0.831417	0.6951	0.730456
0.881496		0.813049
0.718906	0.783866	0.847236
0.84518	0.833458	0.903929
1.02917	0.69602	0.913905
0.701748	0.914716	0.686328
0.928931	1.01765	0.855589
0.879979	1.02687	0.994146
0.808992	0.950259	0.867399
1.00723	0.936509	0.897656
0.887856	0.978084	0.936472
0.946413	0.877648	0.85486
0.886849	0.878296	0.872371
0.958858		0.805803
1.00608	1.04269	0.784046
0.757596	0.835016	0.726969
0.912523		0.929295
0.889849	0.790289
0.98927	0.786241	0.885466
0.73653		0.800812
0.890395	0.95754	0.968935
1.08596	0.845797	0.879799
0.93131	1.02717
0.938533	0.829304	0.804317
0.798026	0.906168	0.674443
0.901245	1.02557	0.815973
	0.857697	0.841008
1.00575	1.03724	0.911022
0.772302	0.709525	0.809876
0.715731	0.77584	0.810572
0.803014	0.886233
0.888769	0.760632	0.912389
0.861664	0.746148	0.93639
0.892432		1.10357
0.825111	0.911296	0.824299
0.852541	0.747245	0.918746
1.06858	1.02106	0.886584
1.00046	0.964449	0.712662
0.784488	0.959305
0.900901	0.745128	0.92244
0.845152	0.787945	0.992038
	0.939244	1.04928
0.883382	0.841983	0.855792
0.905305	0.983706	0.648235
0.699173	0.827974	0.735822
0.959962	0.841042	0.77528
0.823101	0.82755	0.685935
1.00142	0.811297	0.756808
0.948884	0.906105	1.05551
1.09101	0.683374	0.957035
1.0002	0.919425	0.838885
0.860028	1.10789	1.00891
1.00996	0.993554	1.02361
	1.01723	0.951158
0.92456	0.818617	0.91945
0.840095	0.846078	0.924484
1.06688	0.883955	0.756006
0.93967	0.912566	0.877753
	1.10643	1.08675
0.982032	0.967253	0.843915
0.988205	0.951347	1.06134
0.965073	0.753372	1.01343
0.901173	0.776393	0.802859
1.13185	0.76172	0.925649
0.8947	0.93192	0.683961
0.759069	0.835006	0.854562
0.907702	0.80413	1.11419
0.899319	0.83644	0.813044
0.789275	1.02347	0.896875
	0.936021	0.82595
0.827255	0.92679	0.925476
0.836247	0.795212	0.916119
0.803667	0.785599	0.914518
1.10187		1.02402
1.06404	0.757913	0.91167
0.968426	0.916953	1.12381
1.01543		0.877575
0.950222	0.911119	0.679006
0.891852	1.07303	0.874758
0.876987	1.02758
0.970914	0.757549	0.764157
0.905342	0.90632	0.924738
0.890436	1.05781	0.846917
0.939389	0.940834	0.810799
0.754395	0.899488	0.834614
0.767454		0.947098
	0.729668	0.958277
0.959786		1.13987
1.10075	0.906568	1.02911
1.01248		0.917665
1.04324	0.926126	1.25332
0.902267	0.83865	0.899447
0.832325	1.03261	0.898614
0.85016	0.703048	0.848238
1.1189	0.6798	0.92074
0.850622	0.881071	0.878473
0.938847
0.791125	0.797348	0.861037
0.861702	0.896711	1.08753
0.791309	0.763746	0.920101
1.00624	0.860417	0.839008
0.837644	0.845957	0.71787
0.924371	0.965675	0.748557
0.994572		1.10579
	0.842442	0.814651
0.745554	0.945314	1.15331
0.843807	0.96669	1.05956
0.937144	0.792815	0.920584
0.857437		0.985612
	0.854228
0.728107	0.831813	0.883751
1.05398	0.779237	0.865808
0.940862	0.740114	0.967012
0.987495	0.822938	0.951206
0.953897	0.834938	0.858128
	0.841688	0.846233
0.950948	0.998066	0.90982
		0.980866
0.861994	1.06685	0.91972
0.869767		0.760365
0.810084	0.84539	0.81914
0.907071	0.933928	0.780047
0.93416	1.03023	1.09398
1.22463	0.781798	0.880699
1.17122	0.895197	0.995929
	0.787893	0.865358
0.88919	0.752848	0.896422
	0.724771
0.837995	0.996196	0.797123
0.952737	0.796252	0.93614
	0.815311	0.941468
0.789125	0.944708	1.07884
0.860122	0.90915	0.714591
0.891129	0.760359	0.753655
0.882323	0.884306	0.765798
0.888112	0.867052	0.785122
0.77073	0.824789	0.896482
0.808834	0.866161	1.00588
0.971405	0.904805	0.896506
0.875564	0.948921	0.855119
0.771292	0.710826	0.86116
1.08903	0.803665	1.09054
0.921921	0.93159	0.884858
0.905346	0.8945	0.999346
0.837933	1.07954
0.902143	0.884388	0.92567
0.854411	0.837466	0.860511
0.991022	0.858116	0.776789
0.88135	0.843698	0.837592
0.823653	0.95631	0.728883
1.08753	0.89031
0.937889	0.856557	1.04555
0.841012	1.01057	1.00782
0.780573		1.02657
0.909364	0.775365	0.982161
0.83867	0.953107	0.67705
0.974426		1.0064
1.04302	0.946251	0.987961
1.06893	0.785945	0.802199
0.8799	0.757359	1.05837
0.958584	0.810663	0.950719
0.717221	0.928814	0.807071
1.01707		0.874264
0.900732	0.915135	0.843435
0.943229	0.930684	0.795442
1.18749	0.697129	0.895395
0.777989	1.00846	0.852477
0.875971	0.801205	0.979604
0.930436	0.945513	1.0598
0.948228	1.05765	0.946285
0.957625	0.833564	0.78863
0.929391	0.998821	1.07539
1.1816	0.848622	0.822674
0.818073	0.997561	0.898183
1.1129	0.902719	0.84554
0.852684	0.686765	1.0238
0.956423		0.896597
1.10432	0.735571	1.00755
0.805363	0.829018	0.972577
0.903562	0.869034	0.931867
0.940066		0.877135
0.807681		0.741342
	0.927958	0.935933
0.758946	0.669567	0.95826
0.972265	0.860107	0.628512
	0.790162	0.686703
0.962448		0.778574
	0.782601
1.08207	0.864385	0.959176
0.797591	0.80598	0.716543
0.906307	0.860724
0.785608	1.07748	0.86623
0.946888	0.784849	0.891932
0.920902	0.925776	1.10167
0.93797	0.828973	0.64779
0.776917	0.788544	0.908906
1.23773		0.651323
0.921142	0.766697	0.789357
0.948541	0.730932	0.897059
0.824573		0.985127
1.0259	0.772773	0.903216
0.955731	0.922297	0.68904
		0.802466
	0.761296	0.915161
0.928172	0.894048	0.729722
0.830101		0.695641
1.01067	0.955967	0.998268
0.772433	0.935849	0.77873
1.01427		0.79701
0.964383	1.18678	0.948089
1.04918	1.13387	1.02061
	0.838667	0.839308
0.943328	0.810713	0.718182
		0.824278
0.950867	0.968098
0.871554	0.694082	1.00671
1.01711		0.775618
0.977577	0.672991
0.816912	0.877756	0.813048
0.986015	0.709323	0.924147
0.932242	0.702869	0.836481
0.97624	0.961148	0.897248
0.91549	0.703519
0.964188		0.821134
0.902129	0.99793	0.892736
0.991864
0.829305		1.06555
0.880395	0.86147	0.767707
0.830014	0.978732	0.782916
1.04184	0.778893	0.804817
0.859563	0.888539	0.848948
1.00005	1.04954	0.785315
1.11768	1.00554	0.672815
0.944154	0.729033
0.821175	0.703306	0.858243
	0.882999	0.876395
0.898098	0.766071	0.629179
0.896514	0.782251	0.876867
1.05939	0.6534	0.962765
0.820687	0.830777	0.747787
0.926262	0.756835	0.808934
1.04993	1.20124
0.743769	0.852924	0.856841
0.886125	0.901286	0.837079
0.885771	0.837268	0.891923
0.896371	0.8975	0.930628
0.971346	1.15257	1.03205
0.860966	0.995759	0.975804
1.00249	0.877497
0.943604	1.00371	0.717494
0.797737		0.790396
0.941181	0.791307	1.21324
1.04154	0.916249	0.799951
1.0449		0.97809
0.85003	0.749177	0.838315
0.918982	0.884872
0.864599	1.12395	0.928292
0.968859	0.99037
	0.81707	1.05621
1.00376	0.7767
0.850184	0.995106	1.21059
0.970254	1.02997	0.929236
0.897217	0.855581	0.975277
1.0163	0.883221	0.838036
1.00735	0.826253	1.04742
0.982306	0.891844	0.99022
0.954503	0.979782	0.904373
	0.807314	0.815688
	0.843708	0.881949
1.02383	0.642516	0.94638
0.865147	0.853837	0.876869
0.909397	0.77552
0.92634	0.840819	0.790044
1.02733	0.929698	0.889803
0.916873	0.935404	0.831426
1.09067	0.858448	0.829854
0.907861	0.912679	0.782196
0.851842	0.761768
1.16626	0.946117
0.91385	0.990668	0.813545
0.917461		0.827815
0.93347	0.795444	0.799278
0.775434	0.766246	0.816118
0.9411	0.908578	1.01276
0.893149	0.683516	0.817227
0.839554	0.842392	0.94049
0.912247	1.08323	0.772561
0.735363	0.870527	0.794413
0.914		0.671435
1.04197	0.901219	0.875824
1.15147	0.787638	1.03938
	0.657898	0.801282
0.749209	1.01185	0.988131
1.13615	0.920272	1.06812
1.05735	0.732667	0.975607
1.03052	0.894562	0.789259
	0.93584	0.73687
0.802682	0.942704	1.19895
1.0067		0.74178
0.947821	0.717532	0.815382
1.15888	0.819716
0.862567	0.822998
1.0037	0.84143
0.998098	0.897959
	0.700098	0.90226
0.901086		0.988276
		0.756851
0.692413	1.03568	0.915482
1.13631	1.0426	1.19116
0.898478	0.812517
0.822517	0.813151	0.835399
1.03653	0.863485	0.776384
1.00811	1.02975	0.746731
0.865317	0.889572
0.696912	0.927184
1.00815	0.739148	1.01158
0.846352	1.06634	0.737265
0.87886		1.25361
0.832459	0.782713	0.943836
1.07329		1.0707
1.0212	1.02985	0.710676
1.02239	1.09823
1.05959	0.785956	0.789326
1.00779	1.08017	1.01184
1.01319	1.00996	0.786461
0.991778	1.00177	0.806452
0.966597	0.889723	0.74979
0.872581	0.90756	1.06665
	0.976667
0.984044		0.728148
0.863833	0.861307	0.775849
0.834714		0.903452
1.13056	1.14757	0.918423
0.868894	0.868153
1.02378	0.900251	0.830336
0.961833	0.818353	0.853784
0.859261		0.915207
1.0347	0.695919	0.809881
1.03562	0.706628	0.621559
1.04922	0.700503	0.804002
1.08404	0.733988
1.06665	1.11127	1.08923
0.958078	0.81883	1.00806
0.786875	1.06892	0.899028
1.00197	0.967573	1.18343
1.03469	0.753808
		0.704948
	1.08876	1.20856
0.842896	0.870352	0.90433
0.92894	0.946091	0.83608
0.885292	1.07841	0.710115
0.996608	1.11866	0.979836
	0.87515	1.14432
0.981504	0.780942	0.726596
0.865356		0.797796
1.00274	0.816367	0.838532
0.807687	0.953584	0.726527
0.906625	0.828196
1.09687	0.884057	0.686966
0.843633	0.942581	0.896426
0.756756	0.820364	0.717504
0.832008	0.889272	1.23877
1.00007	0.834333	0.960172
0.882742	0.655291	0.951085
0.92741		1.06215
0.983953	1.02875	0.90853
0.86592	0.982792	0.850048
0.82397	1.11914
1.10195	0.691565	0.866905
0.849365	0.921497	0.783874
0.878144	0.681494
0.710097	0.905326	0.844651
0.913576	0.999973
0.85515	0.899367	0.782434
1.04359	1.01342	0.909892
0.932974	0.691879	0.803855
1.06743	0.927539	1.21964
0.735067	0.800974
1.06711	0.730039	0.745932
0.898325	1.01645	0.924838
1.10984	0.833313	0.88525
0.924997	0.799402	0.81693
0.99522	0.917878
1.07201	0.870355	0.994571
0.893398	1.03287	0.871736
1.04945	0.948719	0.949758
0.764582	0.903142
0.986169	0.768503	0.901331
0.764956	0.768137	0.962172
	0.953857
	1.00765
0.863368	1.06769	1.06324
1.01752	0.89885	1.0605
0.794982	0.793693	0.939137
0.989887	0.799952	0.792534
0.88955	0.750285	0.747874
0.771649		0.740847
0.956906
0.868636		0.921156
0.882041	0.832124	0.618972
0.863085	0.688276	0.880978
0.844724	0.758175	0.804651
0.804552	0.775667	0.91282
0.834172	0.87234	1.01886
1.11925	0.762163	0.849637
1.14955	0.810419	1.04136
1.11132	0.833757	1.07825
0.949796		0.875548
0.791843	0.905598	0.784416
0.771408	0.882795	0.97866
0.91543	0.662007	0.97964
1.11895	0.885247	0.960122
1.12287	0.931966	0.813772
0.866546		0.80191
0.908377	0.810791	0.943064
0.879449	0.715959	0.621081
1.03692	0.79874	0.891417
	1.02315	0.861324
0.742206		0.652631
0.935475	0.84067	0.741489
0.722196	0.841365	0.785702
0.954052
0.848402		0.694837
0.999032	0.918156	0.672926
0.970497	0.692377	0.845458
0.809214	0.930319	0.939282
0.858615		0.851495
0.867231	0.8415	0.875702
0.886308	0.670542	0.896876
0.781016	0.732956
0.90467		0.879894
	0.756746	0.939649
	0.820357
1.08752	0.755478	0.898987
0.814776	0.723917
0.981977	0.765951	0.81743
0.723709	1.02535
0.793679		0.855538
0.856287	0.851601	1.03419
0.71098	0.645694
0.954236	1.04939	0.667449
0.893135	0.918406	0.878622
0.86317		0.880134
0.980582	0.910235	1.1203
0.901966	1.02631	1.00077
1.10202	0.651025	1.11193
1.11637	0.911466	0.705356
	0.867392	0.81092
0.748376	0.766856	0.701412
	0.686051
1.03317	0.987925	0.91733
1.01272	0.814864	0.693119
0.791715		0.752362
0.726401	0.940322	1.02965
	0.874338	1.00415
0.762673	0.751761	0.770657
0.794243	0.897579	0.895526
0.789837	0.817884	0.918495
0.904515	0.883967	1.052
0.901856	0.805545	0.700554
	0.927504	0.864834
0.948292	0.914133	1.04007
0.924984	0.853586	0.930456
0.781303	0.961749	0.858436
1.06384	0.771468	1.03417
0.866726	0.838576	0.918698
0.875529	0.803396	0.77291
0.836947	0.742011	0.794947
0.924526	0.719172	1.0842
0.721699	0.818406
1.02592	0.926997	0.880575
0.895722	0.799056	0.805802
0.96602	0.919949	0.950636
0.885941	0.755871	0.749128
0.982778	1.00037	0.632671
0.818817	0.768273	0.729869
0.940294	0.845334	0.860626
1.00154	0.768574	1.13897
0.84501	1.10779	0.962267
0.787385	0.964244
0.946367	0.853981	0.878169
		0.831402
0.84745		0.886034
1.01999	0.659385	0.84294
0.702627	1.05401	1.03398
0.822635	0.932055	0.663571
0.884221	0.74264	0.794247
1.01596	0.837139	0.966071
0.92644	0.824497
0.915335	0.796917	0.844521
0.830134	0.859384	1.05142
1.00836	0.645027	0.769683
0.969238	0.977633	0.953919
1.05321	0.714216	0.833468
0.879019	0.906731	0.739727
	0.728192	0.628878
0.968051	0.872297	0.84921
0.967888	0.782722	0.987587
0.892093	0.869051	0.796803
0.899691	0.89056	0.722709
0.754377		0.79085
	0.66282	0.849616
0.754853	1.00341	0.85545
0.820607		0.799628
0.973706		0.943877
0.818808	0.86472	0.845224
0.93222		0.870303
0.840389	0.673586	1.19455
0.804201	0.982432	0.908224
0.846956	0.980086	0.845405
0.871754	0.741069	0.718835
0.727017	0.757487	0.89625
0.969052	0.798802	0.887644
0.8055	0.671448
0.807852	0.719305	0.694002
0.78841	0.943551	0.874885
0.954812	0.970897	0.81012
	0.87317	1.01454
0.91092	0.683564	0.823577
0.867029	0.845953	1.02458
0.700434		0.861932
1.09086	0.935034	0.869582
1.04156	0.955349	0.800084
0.784878	0.9642	0.911444
0.778808	0.803098	0.940108
	0.862819	0.834687
0.848743	0.656744	0.924465
1.12821	0.745953	0.686215
0.961545	0.651527	0.675443
0.899349	0.988156	0.832136
0.822512	0.724548	0.901055
0.718455	0.717178	0.912498
0.910512	0.838608	0.767687
1.00205	0.909567	1.14238
	0.898298	0.848181
0.816937	0.714206	0.82635
0.793825	0.921409	0.776439
0.714495	0.885644	0.863607
0.916267	0.820468	0.795565
0.908286	0.716584	0.679054
1.00819	1.06867	0.758615
0.989434	0.843049
0.910697	0.743468	0.877857
1.07246	0.881055	0.87826
0.728298	0.696262	0.719152
	0.914452	0.843472
0.880009	0.918774	0.83561
0.942457	0.890549	0.778106
1.03351	0.843738	1.11482
0.896497	0.87858	0.831466
0.913951		0.7439
0.991231		0.68902
0.872919	0.889986	1.01738
0.872941	0.873664	0.849513
0.985911	0.83355	0.7458
1.02269	0.779156	0.69816
1.01062	0.791779	0.856203
0.774195	0.904835	0.67249
0.942868	0.984269	0.948103
0.803922	0.987145
0.936398	0.870327	0.855771
0.904638	0.897978	0.663611
	0.755043	0.944033
0.922319	0.767598	0.773172
0.866622
0.941203	0.835514	0.762777
1.01156	0.95305	1.07191
0.908021	0.703845	0.86808
0.848348	0.832997	0.784984
0.880088	0.975333	0.670204
0.717798	0.806265
	1.04357	1.01475
	0.705851	0.902857
	0.851764	0.794434
0.831858	0.919021	0.778542
0.834016	0.637758	0.673089
0.938778	0.836899	0.899989
0.940695		0.680659
1.09489	0.927024	0.885108
0.818386	0.743532	0.742634
	1.03962	0.868992
0.862383	0.929295	0.826374
0.746421	0.890817	0.809257
0.838197		1.14623
0.815419		0.811284
0.729581		0.870752
1.00124	0.754853	0.8025
	0.879338	0.90413
0.949912	0.920569	0.942479
1.01104	0.893674	0.729042
0.817147	0.813833	0.829538
0.971354	0.732202	0.775863
0.910607	0.666481	0.796842
1.00695	0.91595	0.963285
1.18627	0.96928	0.694793
0.8162	0.862513	0.919541
0.970643	0.786578	0.854177
0.943614	0.814108	0.809171
0.778973	0.80744	0.775811
1.00677	0.852293	1.04805
1.0721	0.964619	0.868913
0.944583	0.926625	0.981078
0.963941	0.824898	0.72539
0.931347	0.782262	0.740661
0.974312	0.87021	0.849208
0.814286		0.856741
0.987931	0.821146	0.921195
0.950564	0.862701	0.900598
1.15124	0.901822
1.0886		0.997948
0.774551	0.869577	0.792766
0.777154	0.811513	0.814844
1.02509	0.935205	0.755452
1.0234	1.01085	0.931094
0.805161	0.878083
0.843973	0.690324
0.81833	0.934216	0.739654
0.909169	0.977166	0.6294
1.15907	0.850326
0.849107	0.801222	0.778556
0.899541	0.80292	0.915462
1.05967	0.991049	0.693075
0.911804	0.920154	0.741562
1.03855	1.03577	1.08031
1.08553	0.89604
0.950774	0.796259	0.78365
0.917267	0.722046	1.02473
1.04777	0.94095	1.10007
0.791475	1.18226	0.709084
0.971461	0.720927
0.783872	0.852104	0.672553
0.84853	0.891992	1.01162
0.948286	0.874159	1.00022
0.712371	0.73417	0.920903
1.12936	0.840175	0.778511
0.868732	0.763634
0.960631	0.936267	0.929818
	1.06461	0.827451
0.868634	0.846776
0.922714	0.854081	0.983379
0.998378	0.907243
0.858274	0.715451	0.860142
0.88914	0.904565
0.865099
1.04547	0.710123
0.939891	0.908181
	0.974659
0.76374	0.923932
	0.881612
0.985208	0.722095
1.14796	1.1373
0.945867	0.836204
0.71314	0.895059
0.966092	0.89739
	0.827296
1.03619	0.886589
0.95605	0.840935
0.875493	1.12551
	0.972213
1.10059	0.746133
0.934653	0.738807
0.869453	0.72957
0.911504	0.736638
0.81996	0.819111
0.875663	1.08537
0.951884	0.759237
0.975211	0.973692
0.921822	0.741075
0.8602	1.01506
0.98226	0.914153
0.937092	0.918081
0.718777	0.991166
1.11506	0.80399
0.992462	1.01186
0.75942	0.715167
1.01602	0.64642
0.835567	0.759687
0.986413	0.821234
	1.00832
1.08773	1.0085
0.980876	0.995695
0.904785	1.10099
0.75835	0.732043
	0.706407
1.02872
0.947503	0.91241
	0.897644
0.915	0.915917
0.879648	0.855449
0.94499	0.870355
1.07222	0.698034
1.18424	0.848165
0.792826	0.849325
	0.983878
0.859172	0.733508
1.00304
0.934655	0.948289
1.05958	1.07235
0.969664	0.736414
0.870334	0.875389
0.760532	1.0133
0.805533
0.968683	0.954954
0.879421	0.677334
0.941793
1.06721	0.909385
0.947199
0.944484	0.767431
0.859196	0.899165
	0.920223
1.00687
0.927841	0.673092
0.71555	0.842056
1.02219	0.869589
0.725416	0.651018
1.11837	1.02019
0.870784
0.819436	0.900646
0.934954	1.00008
0.809869	0.825338
1.00761
0.990267	0.941143
1.0247	0.665949
	0.889632
0.985276	0.972361
	0.984419
0.960648
1.01267	0.796055
0.70055	1.1561
0.889525	0.959624
0.868169
0.714043	0.770612
0.895241	1.02186
0.950277	0.862474
	0.838984
0.943699	0.795981
0.949947	0.755046
0.899471	0.984355
0.869319	0.76446
0.876842	0.743316
0.938574	0.729516
0.75084	0.831591
0.984851	0.913454
0.920787	0.988056
0.834312	0.868348
0.834001	0.90774
0.954266	0.828182
0.899574
0.786131	0.855702
0.762112	0.801438
	1.05434
0.769643
1.05293	1.01805
0.706667	1.04971
1.02088	0.827635
0.85041
0.728883	0.838342
0.80683	0.914821
0.935946	1.05511
0.973545	0.722863
	0.747522
0.86935	0.979295
0.725891	0.836386
0.860446
0.715978	1.01082
0.981984	0.881453
1.0313	0.714809
0.876416	0.737596
0.931142
0.805188	0.776181
0.813474	0.792021
0.876737	0.990391
0.952556	0.776622
0.990715	0.875786
0.831988	0.895508
[truncated: 50 more rows]

## Sheet: TFEB_TR 30min chir response 
TFEB_TR; 30min chir response
vehicle	2uM CHIR99021	20uM CHIR99021
	1.34162	1.01061
1.22168	1.31098	0.947687
1.44805	0.921939	1.3279
		1.03982
	1.07781	0.952522
1.1711	0.864831	1.05652
1.08646	1.17881	1.03224
1.33381	1.01101	1.27063
1.03303	1.44977	1.24069
1.4033	0.926266	1.2757
1.23721	1.88135	0.992617
0.979508	1.78929	1.50432
1.36542		0.832634
1.22639	1.18859	1.16596
0.951348	0.997864	1.09565
1.56013	1.0575	1.05554
		0.745202
1.19096	0.769947	1.14542
	0.835824	1.1054
0.896067	1.11985	0.93575
1.99157	1.28196	1.46436
2.12867	1.23283	1.13092
1.26543	1.35067	1.17277
1.46303	1.20699	1.18405
1.35297	1.289	1.08171
1.46435		1.19179
1.03313	1.22214	1.32043
0.919448	1.21366	1.43599
1.266	0.862185	1.09864
1.12799	1.23819	0.950757
1.29095	1.26093	1.07918
1.19015		1.38215
1.33473		1.47347
1.67092	1.15377	0.987397
1.45034	1.19199	0.71556
1.47758	1.17737	1.38447
1.69431	1.27688	1.41427
1.10292	1.18315	0.955569
2.00964	1.25593	1.57034
1.09026	1.33305
1.59981	1.25657	1.07369
1.18327	1.26256	1.39986
1.69681	1.26493	1.0637
1.14338	1.50908	1.01202
1.22976	1.38704	1.26687
	0.916609	1.19006
2.21547	1.20804	1.21729
	1.11972	1.20411
	1.1569	2.25149
1.19425	0.938538	1.45714
1.36252	1.68647	0.911196
	1.37485	1.38077
1.25332		1.43201
1.21283	1.01207	1.6009
1.16541	1.36932	1.37955
1.15396	2.01863	1.17634
1.23256	1.06818	1.26307
1.39011	1.07925	0.882324
0.97459	1.24071	1.10827
1.3463	1.19942	1.16162
1.42238	1.17676	1.2818
	1.42509	1.98839
1.36365	1.14272	1.07141
1.35114	1.39064
1.16305	0.983041	1.15926
0.854247		1.09344
1.27301	0.757757	2.17973
1.31441	1.15222	1.15988
1.85534	1.19892	0.94645
1.3851	1.30194	1.12274
1.23989	1.0826	1.12979
1.30687	0.980554	1.09099
0.933812	1.12949	1.28759
1.17548	1.08498	0.98949
1.04232	1.16517	1.22821
1.53518	1.12551	1.1223
1.19222	1.50235	1.08997
1.3417	1.26044
1.09821	1.01288	1.12377
1.8051	1.04436
0.921763	1.55339	1.34426
1.07784	1.97415	1.05377
	0.929631	1.25947
	1.36492
1.01397	1.36903	1.14232
1.32308	1.04212	1.27306
1.00427	1.03745	1.15086
1.24959		1.58905
0.983134	1.28571	1.24058
	1.23241	1.27613
1.11643	1.20149	1.01353
1.60028	0.978882	1.12208
1.40812	1.27231	1.39086
1.43225	0.977996	0.959366
1.50454	1.10451	1.32739
1.42016	1.01597	1.0344
1.08595	1.19386	1.21636
1.30434	0.938419	1.09535
0.986022	1.6313	1.5141
1.19472	1.09831	0.789704
1.34425	1.32834	1.15833
1.16326	1.06496	0.760608
1.40642	1.04024
1.98556	1.20729	1.16111
1.20044	1.2966	1.1227
1.88135	2.16497	1.3497
1.90995	1.34563
1.29225	0.888238	1.36362
1.19424	1.17998	1.10257
1.08455	0.867074	1.16062
1.4564	1.99523	1.13563
1.31328	1.36231	1.23753
1.68235	1.08398	1.22789
1.69839	1.30045	1.0459
1.14511		1.11973
0.968702	1.08104	1.32683
1.58453	2.28157	1.99668
		0.755312
1.30244	0.999082	0.956275
1.13304	1.21643	1.15299
	1.4462	1.45674
1.20916	1.24636	1.0829
1.03082	1.13549	1.03359
1.36114	1.04338	1.16343
1.29046	1.18144	1.42946
0.940843	1.0045	1.20371
1.12002	1.35918	0.94495
	1.44568	1.29409
1.01004	0.90072
0.993581	1.19247	1.47867
1.29209	1.03574	1.14692
1.23492	1.22618	1.30217
	0.871951	1.08634
1.31404	1.17042	1.26558
1.05494	1.07971	1.20262
1.26251	1.04247
1.20352	2.04206	1.72588
0.893184	1.4685	1.44457
1.2352	1.18361
2.25067	2.18739	1.96502
1.11234	0.877848	1.26727
1.44161	0.932348	1.21817
		1.16131
1.2576	1.94422	2.26102
1.25281	0.966411	1.3195
0.876744	1.1429	1.35507
1.33424	1.00351	1.29749
1.34801	1.50217	1.02812
1.43052	1.0002	1.67694
1.43754	1.51968	1.19748
1.19975	1.05363	1.32293
1.32706	1.11732	0.987031
	1.35661	0.78851
0.990692	1.26362	1.14113
1.19354	0.940367	1.3614
1.87801	1.06979	1.19078
	1.03118	0.888287
1.1049	1.18413	1.08676
1.35963	1.00571	1.08121
1.23428	0.903216	1.11196
	1.4143	1.09286
1.16929	1.39928	1.44948
1.35452	1.17748	1.194
1.38408	1.11018	2.56638
1.39367	1.48372	1.11953
1.39163	1.14156	0.980393
0.858618	1.61966	0.909559
1.45263	1.73354	0.940768
1.34128	2.38893	1.188
1.09195	1.4166	1.74355
1.57769	1.06993
	1.25728	1.32679
1.39154	1.32574	1.3801
1.45688		1.41498
1.42996	1.19295	1.19519
1.70237	1.45043	1.16458
1.4296	0.951993	1.52766
1.09144	1.35379	1.46679
	0.957435	1.27514
1.25029	1.14865	0.948949
1.52775
1.64464		1.20845
2.0463	0.995583	0.842393
1.06452	1.03076	1.53552
0.918001	1.12604	1.003
1.46453		1.2586
0.938956	1.34797	1.25772
1.20099	1.12275	2.31476
1.88705	1.07134	1.34953
1.284	1.16879	1.19726
1.14677	1.13235
1.24141		1.19641
1.53896		1.04509
1.15079	1.41462	1.02478
1.57172	1.18973	1.0903
1.27208	1.01317	1.60817
1.10628	1.04955	1.07523
0.859248	1.09645	1.3004
2.05677	1.23967	1.05357
1.12695	1.05666	1.16464
1.36233	0.933451	1.66985
1.64219	1.66708	1.25376
1.35428	1.1324	1.37264
1.25226	0.950077
1.00629	1.14885	1.17359
1.15756	0.945302	1.10333
1.23707	1.1653	1.11854
1.32042	1.19378	1.94617
1.16531		1.11769
1.09027	0.906256	1.13882
1.16604	1.14443	1.14202
1.48178	1.62029	1.12276
1.11183	1.30019
1.10221	1.098	1.28494
1.02887	1.50289	1.23996
1.4617	1.19352
1.86162	1.29493	0.904321
1.02825		1.21807
1.15626	1.38391	1.11109
1.11794	1.04543	1.22315
		1.16675
1.91231	1.21263	1.14101
1.3117	1.11294	1.37072
1.1266	1.06816	1.30535
1.24674	1.15164	1.13382
1.19328	1.0158	1.17526
1.31866	1.09098	1.1346
	1.19872	0.853653
1.36773	1.09425	1.26723
1.37207		1.15551
1.15912	1.33129	1.16977
1.23191	1.20958	1.30736
1.03218	0.895139	1.3668
0.859675	1.67643	1.18085
1.21689		1.12703
1.32059	1.07058
1.2067	0.888846	2.61393
1.44502		1.34696
1.29089	1.22047
1.11767	1.11077	0.993579
1.39414	1.08943	1.25097
1.44064		1.05946
0.940651	1.2693	1.13633
1.53398	1.29664	1.07387
1.2159	1.26831	1.28282
1.26132	0.907931
1.31896	1.10597	1.3089
1.04661	1.41256	1.10707
0.944233	1.27109	1.20188
1.09049	0.829221	1.02375
1.25988	0.822327	1.22526
1.28441	1.64382	1.41793
0.849704	1.20335	1.02542
1.60366	1.50194	1.10334
0.875414	1.4235
0.89009	1.0849	1.1254
	1.3317	1.01426
1.41702	2.04663	2.54951
1.06361	1.35702	1.20264
1.3566	1.54015	1.15093
1.19166		1.05508
1.17385	1.52913	0.884368
1.63329		1.08312
1.23688		1.60744
0.909046	1.16927	0.990333
1.2901	1.09112	1.19362
1.2851	0.982839	0.851037
1.23353	1.00562	0.995619
1.55021	1.49437
0.953679	0.836211
1.39896	1.08368	1.21758
1.38112	0.939872	1.47124
1.35999	1.00589
1.23309		1.22867
1.26455	1.0365	1.35629
1.20473	1.08203	0.875498
1.11951	1.41187	1.15643
1.71594	1.01697	0.999367
1.0637	1.61502	1.02391
1.24152	1.03682
1.21796	1.22427	1.07726
1.36487	0.912327	1.24731
1.05321	1.21019	0.984097
1.04753	1.19978
1.21342
1.25351	1.13979	1.284
1.1548		1.1638
1.69657	1.12123	0.865499
1.08447	1.34579	1.08313
1.12148	1.09716	1.22624
0.980611	1.08613	1.0533
1.28351	1.3018
1.23221	1.14562	1.32643
1.32362	1.14774	0.892499
1.05302	0.768649	1.10828
1.53068		1.15065
1.01569	1.27046	1.05656
1.24136	1.04828	1.1651
0.914643		1.04435
1.26749	1.17411	1.12524
1.5008	1.35591	0.982271
1.02197	1.14838
1.00566	1.20723	1.08395
1.38513	1.35427
1.20609	1.58912
0.991555	1.18307	0.778369
0.922847	1.35345
1.21309	1.17494	1.13945
1.41653	1.13939	1.49336
1.18764	1.03735	1.74572
1.23496	0.909639	1.99411
1.08832	1.10641	1.11445
0.966069	1.70183	1.1297
1.13067	1.3075	1.04133
1.60214	1.18378	1.96889
0.894937	1.34807	1.12794
1.47577	1.15086	1.27315
2.09338	1.03099	1.44723
1.24181	0.988074	1.10253
1.53662	1.26875	0.918733
1.73931	0.966747	1.28229
1.12314	1.1536	1.80668
1.09778	1.47558	1.13388
1.09613		1.86494
1.14752	1.13382	1.34118
1.27557		1.1421
1.11159		0.989084
1.33764	1.07374
1.14969	1.10912	1.33283
1.30156	1.17657	1.12086
	1.26541	1.32244
1.52523	0.995127	1.25529
1.14341		1.1314
1.28161	0.96564	0.90311
1.21666	1.089	1.14397
1.40202	1.22245	1.24171
2.02149		0.924611
	1.37932	1.6575
0.999387	1.14212	2.30804
1.06685	1.00765	1.00754
1.13113	1.25832	1.33551
1.1046	0.957306	1.23275
1.25142	1.30145	1.37078
1.10432	0.968568
1.1423	0.88225	0.996515
	1.07083	1.28043
	1.22439	1.28024
1.02443	1.00784	0.939132
0.836064	1.23747	1.17932
1.19645	1.57225	1.25437
1.58327	1.29906	1.11011
1.16313	1.65051	0.940358
0.982371	1.10853	1.16055
1.2526	1.05173	1.14303
1.00313	2.12819	1.0903
1.06705	2.14474	0.976176
1.00493	1.6023	1.16893
1.37266		0.92829
0.901285	1.31909	1.06821
1.18158	1.29792	1.06544
1.40601
1.0693	1.27553	1.45447
1.20204	1.38281
1.15308	2.14281	1.04774
1.67125	0.864809	0.902714
0.936707
1.49691	1.2937	0.970626
1.23665	1.27876	1.12481
1.00145	1.02029	1.09273
1.75295	1.15788	1.43723
1.73006		0.850142
1.23439	2.46461	1.12135
1.03663	1.14536
0.958664	1.58522	0.966422
1.54641	2.07198
1.3099		1.26556
1.07617	0.828779	0.890939
0.878826	1.22236	1.09929
1.10421		1.19597
1.41427
1.12677		0.970596
		1.15641
1.29497	1.55491	0.961876
1.08774	1.72683	1.16626
1.17883	1.90091	1.67434
1.11406		0.836283
1.21463	0.807386	1.43869
1.14293	1.07003	1.43952
1.15618	1.12965	1.1209
1.41716	1.22267
1.24375		1.28953
0.966692		1.26353
1.22145	0.87516	1.29193
1.0343	0.951398	1.12542
1.06108	0.8354
1.3243	1.14476	1.23777
	0.974671	1.31634
1.27228	1.1184	1.25661
1.641	0.982831	1.30731
0.847193	1.12396	1.61898
1.49922	1.14292	1.13604
1.30951	1.15724
1.21686	0.806667	1.14934
1.37658	1.15649	1.02243
1.4489	1.04825	1.25509
1.03439	1.34329	1.12292
	0.992203	1.02283
1.2087	1.06573	0.900128
0.875666	1.20515
1.58873	1.13727	1.04894
1.02328	1.08918	1.05447
0.823158	1.06829
1.52767	1.11856	1.19789
1.41204	1.48942	1.04907
1.02206	1.24279	1.57308
1.30507	1.60078	1.16845
	0.9828	1.05591
0.882026	1.30333
1.1755	1.93587	0.94729
1.14499	1.15844	0.966492
1.15144	1.30097	0.972723
1.00377	1.06686	1.38673
	1.3234
1.42552		1.06069
1.09568	1.16291	1.16095
0.988188		1.08285
1.34588	1.13356
1.20992	1.14891	1.16238
1.15989		1.36616
1.19006	1.4099
0.996143	1.71989	1.08069
1.0257	1.09783
0.832849	1.27546	1.4764
0.919941	1.24051	2.29567
1.62898		1.10332
2.11858	1.15073
1.02663	1.0956	1.16633
2.2702	1.25308
	1.74506	1.36371
0.914934	1.22732	1.04916
1.41155
	1.64162	1.31655
1.37591	1.16594	0.93201
1.304	0.883452	0.806905
0.968493	1.09155	1.49712
1.13778	0.956355	0.89368
1.16388	1.25064	1.29112
1.06034	0.910757	0.948888
1.95464	1.09207	2.00799
0.809731	1.1867	1.16411
1.08404	1.03645	1.11814
0.934309	1.81795	0.972055
1.32748	1.24368	0.940549
1.51461	1.23732	1.07767
	1.39286	1.20696
1.41114	1.18001	0.88074
	1.13304	0.941686
1.22236	1.19313	1.66481
1.43097	1.29043
	1.33081
1.37758		0.943082
	1.28962
1.21878		1.40276
1.17102	1.16535	0.964784
1.00593	1.15885	1.19357
0.98163	1.353	0.895542
1.17011	1.35135	1.06458
0.976893	1.26203	0.898026
1.21331	1.09557	1.40257
1.1344	0.822844
	1.33587	0.739913
1.19423		1.54683
	1.41873	1.02992
1.45076	1.07748	0.877963
1.2015	1.15576	0.774893
2.02414	1.30286	1.27642
1.24604	0.911505	1.05014
1.09782	1.46769	1.28069
	1.47814	1.09736
1.04463	1.36443	0.96418
1.34713	1.07383
0.931051	1.13688	1.19163
1.01862	1.10229
1.26621	1.21165	1.2251
	1.08997	0.947863
1.0802	1.43305	1.28339
1.24948		1.14853
	1.3261	1.01026
1.21228	1.41535	0.858601
	0.814059	0.950179
1.11323	1.40053
1.11616	1.43643	1.22547
0.926957	1.20644	0.960663
1.1734	1.35147	0.996954
1.36699	1.20135	0.866454
2.01808	1.06044	1.0182
0.870363	1.77066	0.868094
1.06605	0.922711	0.693219
1.38186	0.900914	1.06207
1.25093	1.4744	1.37503
1.2841	1.35607
1.24616	0.967499	1.01897
1.09176	1.21544	1.35756
1.06531	1.11189	1.48833
	1.77053	1.02434
1.08801	1.4438	1.26099
	1.4618	0.679838
1.1039	1.13293
1.16552	1.24002	1.20728
1.17591	1.14415	1.17458
1.30595	1.41999	1.16645
1.30909	1.458	0.689495
0.919831	1.23085	1.43996
1.42783	1.31595	1.4018
1.09132	1.20674	1.61326
1.29321		1.36441
1.24715	1.29584
	1.18674	0.871459
1.34252	1.03066	1.16855
1.18956	1.34366	1.38854
1.21147	1.21838	1.08242
1.02044	1.2295	1.21119
1.04042	1.00603	0.958338
1.0162		1.4082
1.30666	1.06691	1.1169
1.25179	1.10424	1.22735
1.17077	1.28798	0.703909
1.38692	1.00534	0.817607
0.992688	1.14704	1.34959
1.00267	1.06147	1.34187
1.07078	1.33309
1.0209	1.19346	1.87725
0.989382	1.43258	1.33341
0.923758	1.07839	1.47796
1.25664	0.995595	0.825608
1.20159	0.93931	1.1062
1.23453	1.16601	1.29745
1.18949	1.11223	1.20308
1.22049	1.46315	1.03768
1.18415	1.42599	1.41563
1.72319	0.869702	1.03206
1.12318		1.02831
1.17974	1.55323	1.17443
1.03636	1.10413
1.04754	1.1833	1.50597
1.29538	1.03347	1.32473
0.98067	1.5592	1.12321
1.29134	1.03983	0.662706
1.29136	1.25857	1.13305
1.64132	0.995248	1.10341
	1.11813
1.53857	0.829833	1.16704
1.26824	0.827053	1.10577
1.03064	0.939418	1.89833
1.23418	1.58912	1.10456
	1.2679	1.13957
1.29931	0.984402	1.24714
1.02212	1.21132	0.820847
1.61336	1.25236	0.833494
1.27281	0.833881	1.41137
1.1702	1.41023	1.16986
1.24132	1.41916	2.07703
1.1483	1.22501	1.88224
	1.38946	1.16082
1.27723	1.2344	0.83045
0.98126	0.946599	1.13772
1.37987	1.21331	1.09409
	0.966933	1.0075
1.06843	1.28988	1.58509
1.39631		1.13593
1.28518	1.2881	1.03923
0.967965	1.26543	1.0834
1.11665		1.16253
1.21471	1.10253	0.809106
0.985407	1.1577	1.06519
1.26432	1.35362	1.25181
1.23827	1.12316	1.27887
1.34422	1.15038	0.939661
	1.23013	1.11663
1.04527	1.12395	1.28259
1.1182		1.14077
1.23584	1.4126	0.96481
1.28723	1.01775	0.776043
1.37205	1.40742	1.22202
1.2822	1.26017	1.10013
1.3399		1.07835
	1.1626	1.24281
1.47927	0.975517	1.38199
1.11451	1.14101	1.00547
1.34283	0.941157	1.09103
1.20697	0.901192	1.34343
1.25015	1.28706	1.2578
1.17123	1.16796	1.06686
1.86196	1.17009	1.02169
1.18495	1.20262	0.75607
1.30174	1.2022	1.08851
1.59187	1.11359	0.91565
1.20258	1.01159	1.40456
2.06733	1.32885	0.864349
1.34519	1.17971	0.848163
1.2477	1.23343	1.35099
0.93351	1.17521
1.10404	1.27857	1.03415
1.45276	1.56126	1.75783
0.837284	1.01525	1.1791
1.35433	1.53628	0.92331
	1.33216	1.4257
1.1545	1.24528	1.29572
1.05941	1.26871
1.44946	0.971361	1.04075
1.60998	1.09721	1.01826
1.15221	1.02572	1.19325
	1.44581	1.02237
1.19141	1.07154	1.05765
	1.11188	0.909535
1.19054	1.07182	1.22113
1.02429	1.34223	1.23823
1.40734	1.69254	1.15358
1.20156	1.28991	0.933052
1.28288
0.988618	1.08074
1.27317	1.09318	1.05825
1.30972		0.80155
1.29017		1.11899
1.18699	1.09705
1.22394		2.02013
1.41283	1.31895	1.00884
1.16298	1.01864	0.830259
1.07646	0.998726	0.935141
1.05099	1.12713	1.80732
1.41698
1.41588	1.3051	1.08144
1.17753	0.963043	0.984364
1.08598	0.895796	0.863241
1.21582	1.19797	1.27767
1.37851	1.35494	1.05872
	1.01465	1.23661
1.43346	1.38693	1.13967
0.898932	1.12777	1.32806
1.08191	1.42064	0.998916
1.6268	1.46479	1.32789
1.15447		1.08652
1.25367	1.03601	1.29168
0.989172	1.53304
1.13836	1.23329	1.16142
1.25577		0.77932
1.4251		1.04689
1.15906	1.34105	0.911644
1.25927	1.25481	1.31051
1.18148	1.36438
1.16179	1.25134	1.34335
1.28984	1.27632	1.02005
1.3625	1.02226	1.10426
1.04811		0.932443
1.36234	0.950627	1.15844
1.33354		1.30687
1.33046		0.971546
1.30325	1.39051	1.01544
		0.908593
1.21518	1.30062	1.05902
0.934146	1.20802	0.884958
0.849682	1.28118	1.22587
1.2415	1.23433	1.11298
0.993371	1.27741	1.32139
1.14658	0.921041	0.83934
1.3124	0.992201	1.125
1.31989	0.870746	1.06077
1.3768	1.54505	1.51605
1.81403	1.23029	0.948231
1.10732	1.03015	0.802455
1.3503	1.34527	0.722504
1.15882	1.41671	1.47173
1.28761	1.39449	1.3469
1.95376	1.22888	1.02819
0.966212	1.25222	1.05758
1.17147	1.32625	1.61443
1.42637	1.22608	1.1483
1.34739	1.18119	2.07321
1.35137	1.26161	2.34124
1.35527	1.28128	1.16143
	1.10277	1.38337
0.972104	1.69006
1.10253	1.2079	0.890562
1.0774		0.91023
1.25864	1.30187	1.15389
1.27952	1.0676
	1.54414	1.18374
1.09169	1.20098	1.10687
1.40115	1.24301	0.789922
	1.0384	1.0428
1.07927	1.31475
1.24035		1.70323
1.13026	1.13241	1.0863
	1.11915
1.461	1.36811	1.00771
1.22619	1.08264	1.33042
1.32114	0.991177	0.904907
1.12035	1.21482	1.2193
1.28972	0.810064	1.51723
0.951709		0.894409
1.25169	1.52991	1.35271
1.33107		0.982333
1.10733	1.1217	0.93101
1.02416	1.91955	1.23388
0.874618	1.11474	1.09315
1.08878	1.02524	0.764706
0.896791	1.18588	1.27818
0.916254	1.62893	1.30839
1.27431
1.41086	1.42939	1.27015
	1.76805	1.35869
1.47262	1.07353	0.980643
1.87528	1.09756	0.894721
	1.68801	1.03157
1.3146		0.854717
1.23279	0.941315	1.24051
0.925154	1.21309	0.920306
1.67669	0.874488
	1.53646	1.39445
0.891569	1.1413	1.23231
	1.34752	1.01542
1.04721	1.42343	0.797814
1.19987	0.996523	1.077
	1.23067	1.03827
1.29764	0.817451
1.33301	0.990605	1.15392
	1.23659
1.23273	1.21091	1.02179
0.965525	1.31683	0.820737
0.95776		1.10379
1.74096	1.24256	1.02019
1.18162	1.49978	0.934049
1.26142	1.04474	0.910911
1.2132	2.09621	1.10791
1.34991	1.17404	0.829131
1.11474	0.984474
	0.997377	0.691553
1.10023	1.19865
1.36487	1.60412
1.34001	1.26541	1.08634
0.907788	0.994434	0.935345
1.10339	0.856478	1.05375
1.1104	1.12483	0.724191
1.18539	1.19116	1.10635
1.3586	1.21212	1.08897
1.09747
1.0771	1.30681	1.10678
1.18216	1.12541	1.16005
1.03195	0.988911
0.949022	1.24425	0.83914
1.56141	1.43989	0.970088
1.20408	1.09603	1.16615
1.2163	1.91485	1.0976
1.15216	1.22386	1.4145
1.1334	1.17607	0.926097
1.30896	1.15355	0.929901
1.22989	0.958532	1.12866
	0.901885	1.1977
0.907865	1.4408	1.29553
1.17666	1.05082
1.01372	1.04751	0.981654
1.15661		0.962005
1.38213	1.4138	1.20747
1.06702	0.984373	1.51526
1.04648	1.17399	0.94005
1.1418	1.42428
		1.06786
0.954029	1.27358
1.21204		1.09693
1.34642	1.19066	1.09673
1.24322	1.03411	0.790512
0.927444	1.58386	0.906487
1.02942	0.922723	0.877427
1.43661	0.979299	0.773753
1.26398	0.784981	0.973316
1.66753	1.48839	1.07703
0.972121	1.65007	0.965938
1.32528	1.00583	1.19871
1.18598	1.29647	0.809749
	1.05981	0.951776
1.08856
1.12804	1.13183	1.01571
1.03171		1.85493
1.03843	1.18738	1.08178
1.10184		0.846851
	1.06265	0.807121
1.22779	1.72987	1.13901
1.07053	1.11776	1.29837
1.27246	1.12961
1.29038	1.04231	0.867563
1.15264		0.901829
1.16041	1.04276
1.28006	2.20722	1.42654
1.26055	1.37511	1.00341
0.959776	1.15294	0.996183
1.19397	1.0322	1.26365
	1.21043	1.11707
0.839821	0.958773	0.798235
1.18097	1.18525	0.90146
1.78463	1.05512	0.905835
1.36966		1.27059
1.45987	1.12682	1.48679
	1.29083	1.15358
1.18595	0.995765	2.0776
1.07958	1.07103	0.914224
1.17477	1.15916
	1.06708	1.29275
	1.1208	1.28751
	1.42555	0.992667
1.14776	1.09573	0.872268
0.971977	0.975024	1.05904
1.18998	1.05265	1.04865
1.44684		1.04538
1.00012	1.18088	1.01614
1.47811	1.09816	1.09018
1.08447	1.28289	1.14233
1.29557	1.01912	1.32439
	0.959021	0.836499
1.19518		1.09235
1.26553	1.12492	1.03155
1.84212	0.805073	1.1847
1.32871	1.32905	1.19665
	1.23447	0.839811
1.25559	1.1374	1.94706
1.155	1.15096	0.806944
1.15202	1.00882	1.22074
0.98221	1.09992
2.08431	1.31701
0.88181	1.28774	0.80307
0.966528	1.39864	0.836664
1.06025	0.811175
1.38833	0.979989	1.13281
1.08028	1.02779	1.08483
1.35528	1.09495
1.36114	1.20426	1.03676
	1.2258	2.24981
1.27922		1.21458
1.26909	1.23787	1.28145
1.16622	1.02191	0.729729
1.32034	0.887797	1.40391
1.40866	0.994278	1.07316
1.33567	1.18483	1.08238
1.18972
0.954529	1.60787
0.969687	1.06731	0.886406
1.36044	1.00957	0.682347
1.15926	1.62659
1.31575	1.20897	1.17491
1.14304	1.00012	0.82619
1.27023	1.11512
1.1654	0.991463	1.13815
1.2594	1.32751	0.838284
1.17029	1.09586
1.02313	1.15076	0.846464
1.11959		1.25412
1.47155	1.20827	1.08149
1.07812	1.23278	1.85282
1.65213	1.14401	0.87693
1.04709	1.28302
1.1272	1.28181	0.846723
0.864133	1.10189	1.10518
0.803896	1.20738	1.02911
1.15719	1.01461	0.78835
1.06706	1.16584	1.03082
1.1995	2.06675	0.816536
1.41972	1.7542	1.04346
1.15825	1.26204	1.31418
1.12723	1.9535	1.01038
0.996903	1.14488	0.887814
1.62677	1.53233	1.20652
1.30256	1.40303	0.94616
1.0533	1.14318	1.07371
1.00076	1.33128	2.09468
0.901443	1.05096	0.834947
1.20588	0.982797	1.06395
	0.955839	0.995193
1.61269	0.956379
1.23144	1.19928	1.27174
1.15408		1.1502
1.31041	0.865855
1.21253	1.36417	1.11893
	1.17651
1.27644	1.15746
1.00738	1.53584	0.937452
1.1408	1.0668	1.10312
1.37696		0.944701
1.06324	1.01363	1.22259
1.43904	1.10792	0.887281
0.932561	1.02364	1.01786
	1.36938	1.03478
1.37751	1.27218	1.18365
1.25412	0.88889	0.917211
1.34082	1.23717	1.32328
	1.2625	1.2429
		0.831852
1.04451	1.01364	0.991919
1.30851		0.991432
0.863915	1.23813	0.756423
1.11505	1.39463	0.970242
1.60403		1.10301
1.19433	1.18981	1.09758
1.40382	1.0396	1.44398
	1.27775	1.02321
1.36934	1.25421
1.36455	1.29561	0.868468
1.13164	1.25355	2.57605
0.903861	1.30929
1.13934	0.901789	1.10543
1.12797	1.22643	1.87144
1.36892	1.38592	1.02738
0.972891	0.873751	0.986935
1.25669	1.14481	1.01113
1.17704	1.0962	1.54468
	1.72999	0.82198
0.911921	1.2012
1.76612	1.28877
1.14436	1.14193	0.971334
1.20216	1.26661	0.993064
1.31819	1.44642	0.934581
1.87578	1.0862	0.820041
1.17567	1.46057	0.729982
1.33757	1.29767	0.994741
1.75706	1.25749	1.4441
1.52047
1.19037	1.06097	1.18486
1.20175
1.06764	1.11882
1.14628	1.13267	0.89423
1.28593	1.25736
1.1806	1.23322	1.25848
1.00114	1.04746	0.98864
1.49724	1.38833	0.868223
		0.959567
1.31427	1.10076	1.15213
1.02815	1.25917	0.938331
1.28556		1.08066
1.08004	1.38826	2.14799
0.964276	1.41726	1.2586
1.46767	1.0914	1.26434
1.50823	1.35676	2.2126
1.13736	1.20011	1.09023
1.08149	0.970835	0.899694
1.35656	1.02232	0.997132
	0.990451	1.11314
1.10293	0.968886	0.710209
	1.16828	1.00566
1.27986		0.706073
1.36058	0.977979	2.17661
1.13016	1.04906	1.4759
1.31256	1.00648
1.10321	1.83157
1.42878	1.14729	1.0739
1.21304	1.03372	0.918835
1.26205	0.839857	1.1084
1.29224		1.36517
0.864811	1.03864	1.06243
1.2794	1.33518	0.984424
1.05227	1.24321	1.37901
1.29647	0.955493	0.980044
1.38685	1.07958	1.0442
1.2879
0.866232	0.870185	1.29686
1.16263	0.962976
1.86231	1.38302	1.04271
1.07682	1.09069	1.05639
1.24504	1.01374	1.35662
1.05771	1.29449	1.11428
1.10734	1.08609	1.75777
	1.09132	0.995847
1.342	1.39615	0.959805
1.22272	1.06508
1.07367	1.12615	0.975687
0.918764	0.951791	0.934709
0.880968	1.08171	0.794853
	0.957763	1.19867
1.23108	1.11968	0.989187
0.998323		1.6609
1.31569	1.20432	1.61587
1.29636
1.14909		0.678544
1.07627		0.885847
1.00216	1.43558	1.09953
0.898914	1.21072	1.066
1.18137	0.867614	1.04794
	1.23862	1.87514
	1.17947
	1.02392	1.04761
1.05013	0.90637	0.977313
1.01582	1.2021	0.990152
1.6788	1.10814
1.24887	1.028
1.31968	1.10872	1.6344
1.22444	1.32213	1.28074
1.38602	1.1109
1.5407	0.984438
0.858166		1.65483
2.08806	0.937295	1.13349
1.15502	1.20406	1.68673
1.13484		1.26325
1.0082	1.26018	0.964232
1.09993	1.36148	0.933406
1.25618	1.10804	0.970841
0.883127	1.1063	1.18162
1.21628	1.05029	1.15657
0.935191		1.69536
1.12582	1.18168	0.823104
	1.23538
1.06806	1.39423	0.942082
1.25736	1.20113	0.951807
1.68181	1.57566	1.16031
1.10176	0.897438	1.30901
1.47448	0.772201	1.13244
	1.30513	0.866598
1.10045	1.26403	0.729391
1.10721	1.54872	1.3102
1.32267	1.37289	0.807411
	0.85403	1.40771
1.12366	2.04433	1.32549
	1.11579	1.10114
0.958729	1.29153	1.13799
1.42238	1.1555
	1.07574	1.36267
	1.23906	0.931746
1.31604	1.22	1.27069
1.26327	1.09422	0.972461
1.25333	1.16434	1.37571
1.16107	0.888545	1.16584
1.18683	1.17223	1.09841
1.23475	1.19679	1.49521
0.960596		0.93911
1.34444	1.29177	1.70255
	1.66797	0.881272
1.21209	1.14941	0.953401
1.1189	0.935362	0.820327
1.15682	1.19613	1.08793
	1.21498	1.23425
0.969264	1.10196	1.52979
1.35102		0.931716
1.19773	1.31267
	1.42687	1.00553
1.14428	0.887889	0.900847
0.974851	0.991001
2.01701	1.02328	1.47648
1.27387	1.3973	0.933121
	1.2925	1.40255
1.13084	1.05594	1.19815
	1.13855	1.34143
2.15157		0.830221
1.13969	0.926055	1.27763
1.03665	0.942052	1.14355
1.48236	1.0348	1.06625
1.37345	1.06264	1.099
0.961242	1.13425	1.04387
1.21521		1.00517
1.23738	1.10783	0.918014
1.30666	1.6425	0.802637
1.35136	1.21763	1.07536
0.865962	1.22299	0.817243
1.3594	1.15897	1.13768
1.06447	1.10258	1.13682
1.32911	0.852215	1.26878
1.21987	1.09201
1.1268	0.840704	1.19517
1.35916	1.25914	0.939441
1.47974	0.929722
1.29211	1.071	1.20803
1.31512	2.17877	0.91096
0.870493	1.46101	1.10279
1.24032	1.52941
1.38588	1.51313	1.10251
1.38099	1.34353	1.12328
1.26317	1.10669	0.942349
0.946126	1.35248	1.00602
1.47184	1.29505	1.10329
1.38355	1.11524	1.69442
1.17826	1.30814	1.08344
1.34404	1.2648	1.64184
1.03506	1.08424
1.0206	1.19614	0.845705
1.35906	1.18049	1.00262
1.01967	1.15438	1.07399
	1.26715	1.2024
1.45622		0.952762
1.68488	1.11904	0.852349
1.48121	1.62722
1.59998	1.14294	0.835369
1.31565		0.924013
1.4291	1.14426
	1.90141	1.09465
1.24502	1.88733	1.00868
1.09953	1.70843	1.00041
1.2855	1.24534	0.906104
1.28833	1.27935	1.57534
1.10686	1.16727	0.845394
		1.02858
1.35686	1.12117	1.29307
1.07252		1.09928
1.21442	1.20886
1.19654	1.11725	0.906869
1.39725	0.990872	1.28093
1.09403	1.12096	0.917037
	1.20655	1.34032
1.23545		0.99393
0.969104	1.01365	0.769753
1.25825	1.09933	1.68464
1.72679	1.34953	0.982922
0.920001	1.12334	0.765335
	0.93454	0.896536
1.13862		1.03616
1.26386	1.22183	1.1007
1.1819	1.16801	1.25748
1.16496	0.862979	0.792786
1.24637	1.23389	1.16207
1.13972	1.31847
1.27738	1.50402	1.07873
	1.21062	0.93063
1.27112	1.57419	1.0396
1.11083	0.83796	0.911466
1.14725	0.985846
1.01244	0.830017	1.13281
	1.04513
1.21962	1.17265	1.60887
1.02403	1.1149	1.38373
1.06764	1.16939
1.44304	1.22052	0.876699
1.2804	1.20478	0.853426
1.00221
	1.11344	1.50512
1.0351		1.2958
0.828091	1.35994	1.3391
0.967005	1.13364	1.21348
1.2044		1.11912
1.2258	1.20725	1.1269
	0.753437	1.01429
1.27671	2.36589	1.72286
1.0237	1.21392	1.19855
1.48856	1.16119
1.37164		1.1827
1.08917	1.59811	0.823388
0.919553	1.23154
1.30449	0.970767	0.890673
1.27583	1.84561	1.01933
1.1686	1.76466	1.39495
1.04479		1.09922
0.97001	1.15492	1.29416
1.01852	1.19895	1.0711
1.01624	1.19967	1.22787
	1.20485	1.08877
1.10782	1.80822
1.21751	1.02454	1.03337
1.14217	1.2806	0.905239
0.948294	1.2279	1.12432
1.60509	1.00659
1.10479	1.25271
1.32035		1.29519
1.5958	2.06981	0.736105
1.5097	1.1688	1.19323
1.67039	1.00662
	1.92392	1.14375
1.11288	1.00131	1.02164
1.32422	1.32209	1.04446
1.16302	1.07274	1.11841
1.49888	0.973228	0.986816
1.17056	0.974151	1.01012
1.29321	2.33429	1.46453
1.02964	0.984178	1.48341
1.24788	1.14799	1.06298
1.49508	1.14081
0.979881	1.10547	1.07009
1.28111	0.986028	1.38649
1.15769	0.964159
	1.27778
1.27647	1.15671	1.00494
0.924847	1.02318	1.06392
1.15127	1.4169	1.15476
1.15968
1.11312	1.00163
1.19905	1.10306	1.23291
1.13295	0.913827	0.88225
1.27066	1.33058
1.74277	1.14603
	1.43956	1.50134
1.1216	1.38524
1.32465	1.00042	0.858335
1.25237	1.12382	1.35888
	1.21989	1.6949
0.928044	1.00522	1.10005
1.03977	1.07518	0.890733
	0.912178
1.39457	1.50835	0.942676
1.23917	1.20755	1.26751
1.31262	0.839996	1.10981
1.42507	1.38397	1.12291
0.966418	1.11612	1.0215
1.15629	0.971777	1.08562
1.19791	1.10301	1.15242
1.06285	1.53294
1.47802
0.81862	0.986586
0.95752	0.903844	1.06456
1.08506	0.937159	0.824205
0.993588		1.08615
1.21107	1.20243	0.961555
1.84767	1.24871	1.49511
1.15042	1.43001	0.973026
1.56999	1.05196	0.99983
1.13049	1.27877	1.54752
1.28045	1.02285	0.993179
	1.36687
1.10106	1.18578	0.982308
1.29462	1.42756	1.17255
0.940098	1.07816	0.970562
1.19183	0.775261	1.09292
	1.28059	1.19501
1.06711	1.4459	0.91315
1.6356	1.01087	0.87075
1.23783	1.16309	0.782097
1.28419	1.43503
1.40677	1.05029	0.770694
1.4136	1.229	0.926813
1.08266	1.40228	2.08866
1.26114	1.95309	1.04751
0.964517	0.998821	0.988698
1.21841	1.30274	1.16536
1.17356	1.13889	0.856453
1.12447	0.94383
1.19627	1.33897	1.10087
1.29001	0.804667	1.31534
1.04061	1.02214
1.21143	1.09784	0.78268
1.74512	1.1589	1.33261
0.873096	1.26078	0.75133
1.14059		0.926777
1.1245	1.0339	1.36231
1.07487	1.09189	1.56702
1.13713	1.04066
1.35585	1.00112	0.847499
1.19939	1.14635	1.82097
1.02089		1.34963
1.15042	1.13811	1.12873
1.48686	1.41186	1.47326
1.04762	0.996263	0.77834
1.25126	1.08593	0.925561
1.58154		0.893168
0.933747	1.04512	0.990319
0.994884	1.17886	1.19968
1.16858	1.26253	0.805462
1.44432
1.17906	1.36024	1.12042
1.31903	1.4425
1.06933	1.04476	1.00002
1.22576	1.0806
	1.10914
1.25412	0.888234	0.968644
0.880149	1.10468	1.2678
0.831541	1.2271
1.06104	1.0851	0.889086
1.06192	1.16734	1.1475
1.20291	1.08556	1.19902
1.07322	0.994196	1.28682
1.46709	0.989859	1.03323
1.10514	1.15329
1.35397	1.01664	1.10179
1.41208	1.28251	0.887443
1.07275	1.49562	0.941736
1.22973	0.944024	0.808575
1.08957	1.03804	0.945998
		1.01231
1.46712	1.1695
1.13171	1.12757	2.18191
0.889523	1.16613	1.10472
1.28509	0.993373	1.30279
0.865399	1.2077
1.06378	1.02079	1.03525
1.22561		0.909053
1.57048	0.994574	1.12646
1.17525	1.31814	1.05029
1.34137	0.950504	1.14331
1.01165	0.991528	1.02979
	1.22512	1.16965
1.46156	1.05243	1.01519
1.08314	1.06487	1.11187
1.3085	0.918705
1.21148	1.54028	0.858776
	1.31398	1.40937
1.35591	1.16111	1.31968
1.33448	0.946425	0.854788
0.939597
1.23513	1.49772
1.47031	1.53433	1.27227
1.20663	0.899815
1.08728	1.45215	1.07512
1.10748
1.18819	1.60154	1.41232
1.12135	1.05509	1.79608
		0.747904
1.11242	1.1186	1.0682
1.35344	1.10869	1.40129
1.0107	0.938585	0.980118
1.74905		0.958867
1.21805	1.92622	0.820762
1.31009	0.889336	1.85068
1.10159	1.59989	1.03435
1.49738	1.39662	0.963
1.09879	1.2262	1.35705
1.07194	1.22534	1.1194
1.18849	0.966826	1.02828
1.09666	0.951261	0.954337
1.25127	1.21601	1.81283
1.29457	1.22536	0.876117
0.950067	0.87004	1.08854
0.874624	0.992216	0.920588
	0.939066	1.3484
1.22952	1.30744	1.12133
1.41448	1.26458	1.04367
1.20071	1.06674	1.17927
1.2635	1.07989	0.961566
0.966617	0.986827	1.53645
0.981366	1.12681	1.03908
1.03365	1.90491	1.22282
1.08772	1.10946	1.29714
1.30789	1.07256	0.789279
0.944205	1.53563	1.02337
0.989281	1.03724	0.938611
1.06261	1.17146	0.84218
1.08889	1.08999	1.22807
1.27066	0.967761	1.1939
1.08194	1.23999	0.943378
1.20879	1.17355	1.27951
1.50476	1.48802	0.949291
	1.16717	0.961218
1.12229	1.15668	1.02551
1.10018		0.803516
1.26947	1.28621
1.18412	1.29823	1.30464
	1.21593	0.969035
0.835809	1.10692	1.72094
1.48951	0.996604	1.16103
1.09145	1.2497	1.01237
1.35692	0.834651	1.01356
1.17076	1.38337	1.11543
	1.01953	1.40756
1.26199	1.09204	0.820098
	1.22778	1.1542
1.2741		1.01731
1.05457	1.31375	1.06393
1.13466	1.21892	1.19406
1.15397	0.94731	0.814791
1.11825	1.10249	1.31324
2.00732	1.05424	0.853278
1.51458	1.12237	1.09235
	2.36917	1.28291
1.02249	1.28237	1.35474
		1.06555
1.11437		1.01449
1.22033	1.14743	0.92672
	1.17816	1.1461
1.02841	0.951425	0.848869
1.15899	1.05973	0.974121
0.992641	1.08995	1.35347
1.41157	1.33326	1.38427
1.25275	1.05678	1.05647
1.69826		0.866108
1.03938	0.92016	0.981714
1.42134	1.15608	0.973187
1.22553	1.3702	1.34033
0.995823	1.25822	0.975133
1.00748	1.0717	0.75492
1.20031	0.965112	1.04191
1.34546	1.03333	1.08008
1.17999	1.44948	1.15171
1.03677	1.07382	1.16745
1.0642		1.0607
1.09817	1.2006	1.11769
1.19247	1.07177	1.26549
1.30539	1.09896	1.07341
1.84153	0.96418	1.08207
1.25011	0.957902	1.60799
1.57606	1.41387	1.18235
1.29765	1.13933	0.901982
1.20236	1.10265	1.59871
1.10156	1.15316	1.10554
1.1579	0.931674	1.1779
1.40159	1.33968	1.17473
1.33956	0.921111	1.17319
1.44757	1.03843	0.823648
1.29729	1.0065	0.932927
1.18994	1.21403	1.64668
0.990278
1.27768	0.799955	1.14379
1.26045	1.04431	1.36419
1.32844		1.15243
1.10683	1.04598
1.08467	0.968217
1.09911	0.805623	0.782189
1.09636	0.997387	0.998166
1.08403	1.30854	1.11122
1.21422	1.28889	0.830724
1.93564	1.02297	0.955277
1.22271	0.922698	1.18608
1.35401	1.19442	1.10162
1.35398	1.24928	1.44461
0.99699	0.947715	0.963613
1.79071	1.7106	0.971545
1.34492	1.25944	0.827473
1.03872	2.41267	0.989498
1.0499	0.831954	1.1725
1.00005	1.3892	1.21593
	1.13979	1.82157
1.58442		1.84945
1.64258	1.25192	0.783372
	0.865238	1.11584
1.2093		0.837376
	1.39881	0.851628
0.813701	1.25016	1.05479
1.02471	1.15131	1.12061
1.08204		1.11612
1.20634	0.991691	1.00977
1.25135	1.35183	1.19634
1.16595	0.902544
1.36738	1.26633	1.18039
1.09281		2.10309
1.83457		1.36306
1.01575	1.15405	1.22774
1.81726	0.904175	1.32461
0.878544	1.20489	0.842355
1.14899	0.908346	1.09259
1.33688	1.15149	1.43989
	1.28499	1.05317
	1.04555	1.22384
1.87672	1.1674	2.14276
1.02023	0.860289	1.08433
1.13839	1.13396
0.948428	1.00223	1.19234
1.46008	0.780044	1.35898
1.53409	0.925632	1.13176
1.14627	1.41086	1.75087
	1.10121	1.19677
0.981633	1.22113	0.913233
	1.08475	1.02977
1.0331	1.15424	1.17324
1.15649		1.14697
1.42411	1.10696	0.961651
1.15996	2.24412	1.15186
1.13321		0.892722
1.2383	1.1339	1.08119
1.24514	1.21939	1.33246
1.66809	1.12805	1.00273
1.2318	0.79384
1.25685		1.07704
1.81982	0.960083	1.06914
1.69021	1.21899	1.11864
1.11106	1.60318	1.14255
1.53473	1.39311	1.18605
0.82934		0.811102
1.22772		1.25006
1.18323	1.18204	0.920808
1.42635	1.5519
2.08501	0.850064	0.899933
1.3919	1.28846	0.952299
0.968484	1.11864	0.782839
	1.30449	1.09034
1.18375	1.0976	0.695456
1.25679	1.42967
0.843929	1.38044	1.16668
1.39233	0.8526	1.31809
0.889788	0.984562	1.03701
1.40686	1.78868	0.857688
1.27139	0.761519	1.41041
1.07473	1.22451	1.17465
1.14752	1.5746	1.16049
1.36414	2.31167	0.878233
1.282	1.00415	0.69463
1.25851	0.946124	1.04663
1.27792	1.28346	1.00783
1.19504	1.43534
1.31503
1.21669	1.26002
1.4893		1.23263
1.0569	1.08	1.06729
1.24674	1.27971	0.836473
1.2814		1.24026
1.31821	1.03831	1.23011
1.24911	0.891596	0.941703
	1.01248	0.938046
1.29072	1.06367	1.37181
1.09328	1.20155	1.07768
1.79645	1.35605	1.22264
1.26287		0.937246
1.11714	0.907913	0.87102
1.82567	1.4367	1.37442
1.20163		1.02325
1.361	1.4974	1.15537
	0.842482	1.1286
	1.15713	1.17891
1.26772	1.06632	0.937325
1.20052		1.08769
1.30726	0.912255
1.20091		1.27844
1.41955	1.27823	1.20209
1.39605	1.34973	1.10461
1.04134	1.08159
1.24557	2.41869	1.10634
1.61476	0.774671	1.15622
1.09172	1.27363	1.2424
1.18277	1.28121	0.964408
1.16833	1.01683	0.898344
1.87495	0.981128
1.0692
1.44598	1.05316	0.998541
1.12223		1.26231
1.25383	1.20629	1.16038
1.04316	0.904697	1.46951
0.993517	1.12548	1.19579
1.27528	1.2426	1.6902
1.22383	1.01945	1.00026
1.07119	1.01757	1.69174
	1.28572	0.967781
1.06874	1.87656	1.30497
1.40007	1.00567	0.878209
1.37988	1.23642	1.12702
1.50385	0.964599	0.879826
	1.32563	1.2938
1.09602	1.12312	1.53816
1.31853	1.25215	1.1277
1.43603	1.27624	1.03774
1.31088	0.932957	1.24943
1.21459	1.37791	1.13593
1.79191	1.1124	1.03519
1.4247
	1.12179	1.59437
1.21022	0.958297	1.06331
	1.16014	0.908688
0.867965	1.20816	0.994653
0.949483	1.16271	1.00667
1.40649	1.23165	1.01581
1.61897	1.03506	1.09548
1.43497	1.11358	0.884937
1.42368	1.21274	0.818347
1.43368	2.30672	1.00962
2.08139	1.6369	1.08642
1.27477	1.05618	0.878486
0.819546		1.04857
0.963143	1.36809	0.897866
0.852362	1.13933	1.16676
1.2349		1.06155
0.989438	1.14431	0.921678
1.4012	1.30836	1.18403
1.68731	1.06809	0.710971
1.29344		1.06417
1.00618	1.0195	1.29287
1.12607	0.985826	0.921784
1.29197	0.885254	1.26102
1.71474	1.30362	1.0815
	0.840746
2.08081	1.02523	1.46916
1.06072	0.913878	1.127
1.08999	0.977967	0.931069
1.07632	1.22284	1.20317
1.67913	1.08924
1.42261	2.41796	1.64018
1.32028	1.97565	1.3739
0.882193	1.25493	1.03238
1.49053	1.23163	0.985559
1.11716	1.89788	1.07359
1.68991	0.794142	0.872734
1.46205	1.46012	1.10292
1.46984	1.31986	1.13625
1.3017	1.12438	1.03575
0.875152	1.11434
1.32072	1.05872	1.2651
2.15594	0.887684	0.989541
	1.82279	1.09864
	1.17327	1.06033
1.00566		0.947338
1.25538	0.823479	1.25188
1.21379	1.69312
1.43405	1.69145	0.938808
	0.992548	1.31808
1.62166	0.897016	1.22232
1.0947	0.935622
1.51478	0.955126	1.01292
1.10224	1.48445	0.976268
1.30587	2.14277	0.82549
1.3224	1.0215	0.996842
1.10386	0.917222	1.932
0.938321	1.21433
1.12726	1.31239	0.7768
1.53001	0.992329	0.862248
1.18953	1.16579	1.08453
1.3263	1.26478	1.19545
1.13352
1.15165	1.05407	0.859725
1.24533	0.76546	1.71168
1.51998	1.11519
1.1479	0.965736	1.04488
1.1303	2.21607	1.11357
1.22499	1.08528	1.30418
1.18497	1.9251	0.900858
1.29242	1.26019	1.19375
1.60066	2.21251	0.885572
1.16904		1.04406
1.36549	1.14586	1.23413
1.03955	1.14994	1.54281
1.05568	0.907814	0.955018
1.08994	0.959224
1.43218	1.18091	0.818517
1.08639	0.746084	1.41366
1.30385	1.36958	1.31134
1.14367	1.07498	1.00248
1.22652	1.62948	1.02079
1.17282	1.50748	0.912243
0.816842	1.56452	1.07423
1.32766	1.83849	0.865175
0.941448	1.06435	1.01467
	1.33593
		1.42386
1.33371	1.13801	1.16689
1.4611	1.01667	1.11248
1.1533	1.10872	1.05442
1.05331	1.38273	1.35838
1.06502	0.989066	1.54708
1.11764
1.16527	1.30508	1.37015
1.10227	0.991203	1.13333
1.08948		1.31079
1.61424		1.2559
1.07675	0.799986	0.965133
1.03232	0.771613	1.21532
1.13475	1.28493	1.13283
1.4522	1.17539	1.14421
1.63026	1.04713	1.19431
1.58695		1.20886
1.623	0.810703	0.95212
0.889574	1.20869	0.915049
0.815052	1.09388	1.60077
1.25296	1.37153	0.956614
1.50921	1.01027
1.85244	0.907467
0.994014	0.905026	1.05334
1.58878	1.22691	1.14214
1.29012	1.21765	1.12088
1.46325	1.21674	0.987358
	1.08762	1.29378
0.805724	0.788789	0.888688
1.24066	1.25221	0.932647
1.07456
1.05728	2.44379	1.65847
1.63707	0.928131	1.11138
1.05907	1.45114
1.41215	0.885003	1.26734
1.14257		0.9425
1.11053	0.958429	1.27875
1.20263		1.78095
1.51536	1.37576	1.30415
1.34697	1.24783	1.18318
1.04001	0.925853	1.24237
	1.30027	1.02396
	1.61093	0.991657
1.72559	1.24027	1.49974
0.999716	1.23957	0.917595
1.19769	1.23625	1.88397
0.955397	0.821896	1.25252
1.10644		0.821368
1.65051		1.02112
1.04445	1.44835	1.07524
1.25004	1.66678	1.03922
1.38057	1.24618	0.893024
2.23521	1.35248	1.02585
1.39513		0.801046
1.34516		0.84506
1.59114	1.26236	1.01762
1.12254	1.23338
	1.08684	0.992362
0.94218	0.991393	1.27408
	0.91249	1.22078
1.40839	1.2894
1.20842	0.940053	1.04077
1.09853	0.831048	1.29398
0.865732	1.45086	0.974646
	1.13539	1.15781
0.986669		1.14754
1.08593	1.02625	1.25742
1.63515		0.970404
1.28649		0.949878
1.69322		1.03553
	1.23966	1.01305
1.51765	1.05836	1.20925
1.32753	1.02202	1.07526
0.943912	1.14071	1.23073
1.40537	1.3301
1.23974		0.987111
1.1416	1.22555	0.925354
1.1296	1.30405	1.06634
1.33661	1.09546	1.19471
1.04651	1.18112
0.943603	0.746488
1.35654		1.11973
1.49249	0.999089	1.2183
1.40528	1.30767	1.09543
1.6898	0.917345	1.23674
1.31577	1.17675	0.972221
1.33671	1.08443	1.07031
1.25969		1.28995
1.18977	2.10277	1.05939
1.05546	1.3727	1.37521
1.20763	1.17209	1.29734
		1.59472
1.42071	1.13999	0.845031
1.455	1.302	1.10878
1.89707	1.06019	1.12555
1.40412	1.13584	0.948404
1.33494		0.791442
1.54637		0.98357
1.50868	1.14035
1.35476	1.11431	1.21404
1.0425	1.06268	1.15823
1.28224	1.13367	1.21177
1.39503	1.24003	1.02104
1.47756	1.10853	1.25245
0.926015	0.996968	1.18137
	2.34788	1.43787
1.2874		1.21882
1.15565	1.04994	1.10565
1.4082	1.04191	1.01
1.16112	1.18981	1.34702
0.908561	1.13125	1.52503
	0.808353	0.951977
0.99797	1.39187	1.4552
1.11243	0.870724	1.50746
1.18289	1.20688	2.12141
1.14798	1.40464	0.85681
1.29379	0.905	1.19109
1.13526	1.29232
0.99456		1.86179
0.948024	1.26374	1.15763
1.12816	1.18382	1.10851
0.932094		0.832974
1.45475		1.3502
1.31789	1.09906	1.00205
1.16915	1.11948	1.1053
0.985784	0.985316	1.31559
2.11867	1.15717	1.06927
	1.10018	1.30738
0.963774	1.01107
1.28662	1.33041
0.913418
1.34193	1.34035
1.45072	1.09566
1.0609	1.24081
0.895761
	1.36209
1.01797	1.1869
1.46086	0.928553
1.49776	1.36984
1.04819	1.37687
1.23454	1.08287
1.18985	1.03991
1.11727
1.34786	1.1611
	0.801177
1.03831	0.990392
1.03581	1.26351
0.899431	1.00177
1.16813	0.898338
1.5337	1.24651
1.70579	1.11188
1.16265	1.09827
1.22394	0.995074
1.64764	1.08358
0.962199	2.10798
	1.0871
0.887189	1.01431
2.24424	0.902239
1.53881	1.33006
1.25518	2.09947
1.22715	1.11218
1.19642	1.06304
1.1804	0.909391
1.21458	1.14158
1.32692	1.44618
1.23226	0.944388
0.926081
0.953185	1.29858
2.26269	1.33869
1.00904	1.26193
1.05573	1.27136
1.55947
	1.42792
0.9269	1.08723
1.06313	0.79897
1.16644	1.20889
1.29387	1.24405
0.93613	1.13454
1.10835	1.14691
1.09634	1.33852
0.914389	1.45461
	1.15291
	1.25108
	1.26974
1.11699	1.02765
1.12559	0.840655
1.12811	1.06784
1.13274	1.12734
1.69476	1.23451
1.12086	1.3443
	1.15167
1.03717	1.56328
0.899768	1.18667
2.19256	1.81679
1.02792	1.67464
0.941559	1.24518
1.12102	1.13612
	0.993398
1.1256	1.13607
1.21363	1.04989
1.0558	0.981626
1.12588	1.26177
1.30957	0.865292
1.40199	1.2168
2.13945	1.27012
1.10273
1.30891	0.933423
1.15718	1.82889
1.21502	1.36817
0.901405	1.29043
1.30961	1.30647
1.08354	1.27092
1.12928	1.08022
1.25931	1.028
1.08961	0.948396
0.975144
1.32425	1.3806
1.3049
1.78568
1.46864
1.00499
0.886861
1.30933
1.76935
0.968357
1.07375
0.973987
1.12343
1.38831
0.922095
1.09086
1.27324
1.2545
1.43159
1.21348
1.12837
1.06511
1.41795
1.0226
1.29739
1.15674
1.0926
1.32304
1.01202
1.5143
0.932605
1.42765
1.16412
0.816465
1.77764
0.95396
1.02156
1.26552
1.25816
1.16524
0.933079
1.156
1.37047
1.13092
0.904655
1.1361
0.934148
1.34893
1.01074
1.27585
1.02402
0.843075
1.81207
1.03861
1.376
0.999324
1.20398
1.10525
1.42121
1.48064
1.13558
0.916525
1.32292
1.29272
1.26785
1.31912
1.16371
1.34579
1.21216
1.27134
1.23472
0.950603
2.06853
1.23145
1.22295
1.0352
1.45949
1.87187
1.33169
1.23671
1.83551
1.23316
1.04891
1.13593
1.26339
1.12285
1.24227
0.999339
1.39388
1.25687
1.00265
1.54309
1.53122
1.31364
1.24181
1.24587
1.10457
0.859764
1.08409
0.851989
1.14423
1.06881
0.952146
0.907135
0.86058
1.3841
1.29189
1.20662
1.34583
1.3876
1.33909
1.05027
2.18782
1.20947
0.878406
0.940297
1.37459
1.19933
1.14926
1.14052
1.48557
1.04628
1.01299
1.04076
1.07682
1.1522
1.56309
1.30104
1.17542
1.22557
0.965688
1.13939
1.2601
1.46486
0.969354
1.83287
1.26593
0.980978
1.15668
1.20911
1.3796
1.05409
0.816356
1.20033
1.38706
1.08973
1.05941
1.2233
1.26529
1.3231
1.02562
1.19515
1.38768
1.29443
1.06121
1.12775
1.27928
1.14804
0.861104
1.11216
1.24352
1.1079
0.984221
1.47287
1.39713
1.33922
1.21669
[truncated: 2 more rows]

## Sheet: TFEB_ENDO 30min chir response 
TFEB_ENDO; 30min chir response
vehicle	2uM CHIR99021	20uM CHIR99021
	0.965061	0.902971
1.02397	0.886709	0.809475
1.17099	0.690482	0.838507
		0.822334
	0.823153	0.868102
0.840294	0.635083	0.770386
0.991867	0.828927	1.05128
1.09952	1.04954	0.686415
0.944405	0.725179	0.89007
0.968885	0.818332	0.640371
0.913803	1.06143	0.760048
0.889997	1.18743	0.857673
0.87335		0.790717
0.934132	0.759732	0.789619
0.823009	0.622629	0.841332
0.96977	0.753693	0.715687
		0.921924
0.904362	0.736161	0.742574
	0.842849	0.883089
0.880439	0.972333	0.780055
0.906482	0.8468	1.13615
0.953826	0.976382	0.836953
0.878022	1.02752	0.908241
0.98783	0.913426	0.72937
0.802439	0.859135	0.679596
1.10294		0.807013
0.853374	0.842311	0.778014
0.717288	0.914787	0.820702
0.978011	0.640065	1.10721
0.872666	0.72583	1.08205
0.94396	0.823684	1.06585
0.838075		0.95116
0.888872		0.805827
1.1046	0.995229	0.702834
1.01452	0.751949	0.631964
1.12594	0.772052	0.97853
0.848565	1.02597	0.929078
0.891282	0.791505	0.993602
0.915632	0.773302	0.979001
0.772487	0.90046
1.13744	1.13449	0.749156
1.09546	0.902535	0.922666
1.06998	1.02972	0.915013
0.879973	0.859094	0.999207
0.949833	1.02137	0.736317
	0.680561	0.818059
0.686745	0.825159	0.834616
	0.727835	0.89882
	0.801853	1.0618
0.787135	0.70736	0.789791
0.748566	1.22428	0.643061
	0.846592	0.925689
0.821755		0.839156
0.90506	0.994656	0.787323
0.783864	1.06845	0.94719
0.806522	1.08316	0.763037
0.858575	0.819251	0.841107
1.23393	0.812524	0.614045
0.660438	0.776588	0.912171
0.953493	0.875411	0.756598
1.04317	0.980757	0.997244
	1.10555	0.719432
0.900245	0.856491	0.778869
0.772705	0.917787
0.696365	0.908163	0.718245
0.711842		0.988448
0.87271	0.676003	0.601745
0.956519	0.982783	0.768711
1.1969	0.729389	0.878294
0.923333	0.962192	0.86944
0.901292	0.626219	0.820667
0.842777	0.706765	0.592974
0.952933	0.759938	0.822814
0.879111	0.740133	0.633914
0.812482	0.709708	0.871061
1.03543	0.832659	0.768444
0.959849	0.918053	1.20388
0.744667	0.791756
0.834134	0.890024	0.726404
1.10228	0.851859
0.763599	0.990827	0.856394
0.750437	1.02512	0.947237
	0.947902	0.77448
	0.847165
0.929192	0.718375	0.673036
0.962153	0.894729	0.713271
0.702142	0.785093	0.873201
1.01193		0.974168
0.788264	0.86674	0.966964
	0.778257	0.914131
0.859265	0.698081	0.986026
1.04273	0.819106	1.03457
0.933701	0.895458	0.889353
0.908651	0.723994	0.605761
0.918459	0.915892	0.815043
0.961687	0.714495	0.686825
0.792412	0.844782	0.57361
1.02101	0.692238	0.74594
0.705885	1.07369	0.836487
0.854142	0.78737	0.668404
0.969667	0.862712	0.891847
0.822314	0.853344	0.795465
1.02863	0.666463
1.11778	1.20597	0.8129
0.837497	0.836636	1.17254
[truncated: 1,895 more rows]
