# Supplementary material for: Continuous sensing of nutrients and growth factors by the mTORC1-TFEB axis
Source: eLife. 2023 Sep 12;12:e74903. doi: 10.7554/eLife.74903 (PMC10547473; doi:10.7554/eLife.74903)
Supplement: Figure 2—source data 1. [file elife-74903-fig2-data1.xlsx]

## Sheet: TFEB_TR Nutrient Addition
TFEB_TR; cells cultured with 0xEAA 0xGluc/Glut 0xEGF/Ins , stimulated at time point 32; sampling time: 2 min; data are cells-by-time
Tx dosing: media
0.638443	0.637714	0.636097	0.628613	0.624765	0.629893	0.597763	0.572023	0.609839	0.602154	0.613113	0.601936	0.591242	0.598191	0.598363	0.594882	0.595546	0.609665	0.616322	0.603482	0.596943	0.611354	0.615968	0.594415	0.590339	0.6029	0.592126	0.588355	0.578645	0.577214	0.564526	0.582686	0.601911	0.577094	0.599627	0.590524	0.570682	0.574652	0.583532	0.564614	0.575877	0.56464	0.563491	0.564779	0.551109	0.557762	0.56267	0.560257	0.572075	0.563747
0.725576	0.719339	0.722012	0.700672	0.715546	0.721167	0.737968	0.731266	0.735651	0.720992	0.693584	0.694058	0.703532	0.705633	0.712095	0.700298	0.704143	0.711747	0.698527	0.698945	0.702592	0.70959	0.698911	0.697848	0.709327	0.700336	0.711684	0.713514	0.722067	0.728085	0.724042	0.753113	0.75664	0.775396	0.760736	0.757307	0.742431	0.73475	0.712264	0.710944	0.708691	0.709935	0.721063	0.700476	0.714986	0.699068	0.708754	0.715629	0.703161	0.70493
0.595065	0.566129	0.569282	0.585891	0.571179	0.595141	0.552315	0.551671	0.577405	0.571432	0.559394	0.552899	0.595769	0.646696	0.707143	0.769632	0.769738	0.778686	0.810349	0.764274	0.741087	0.744661	0.804379	0.823668	0.774069	0.7572	0.734092	0.76956	0.761511	0.727836	0.741599	0.823436	0.822666	0.804257	0.827623	0.758714	0.764585	0.750782	0.764761	0.724517	0.758276	0.784075	0.777617	0.78798	0.798813	0.793159	0.790307	0.826805	0.825223	0.831317
1.71291	1.60269	1.66212	1.69971	1.31567	1.9237	1.56821	1.803	1.74491	1.75104	1.56023	1.70554	1.80394	1.83219	2.02333	1.87775	2.26294	2.14463	2.22576	2.27119	1.97199	2.07989	2.28899	2.3751	2.28113	2.24538	2.5693	2.2668	2.24543	2.23966	2.12677	1.99665	1.80524	2.02511	2.02967	2.02561	2.10359	1.98299	1.84699	1.97412	1.79494	1.89432	1.82979	1.64013	1.7816	1.77199	1.74783	1.5109	1.55827	1.43645
0.59948	0.61085	0.598972	0.615057	0.614505	0.614398	0.618988	0.618005	0.631851	0.628373	0.63476	0.63816	0.64063	0.631361	0.635675	0.630514	0.631189	0.627827	0.614521	0.610969	0.617127	0.62434	0.614991	0.609024	0.609279	0.609145	0.609443	0.593444	0.601392	0.600559	0.600588	0.648187	0.64381	0.6293	0.628668	0.634061	0.627744	0.61786	0.610196	0.612047	0.615289	0.605218	0.600192	0.593609	0.58898	0.571658	0.578242	0.557192	0.576195	0.567939
0.904187	0.896463	0.872762	0.884186	0.875099	0.886621	0.898624	0.900136	0.897071	0.898476	0.875083	0.855261	0.857722	0.845852	0.848329	0.860222	0.843928	0.855583	0.867799	0.87575	0.884243	0.919922	0.907637	0.923431	0.91463	0.873157	0.875468	0.87122	0.884377	0.891682	0.853096	0.896616	0.929975	0.923185	0.88727	0.887353	0.904036	0.908385	0.896558	0.888604	0.879892	0.859041	0.8776	0.867268	0.87023	0.831649	0.817201	0.851108	0.85563	0.848075
0.811441	0.800986	0.809946	0.807905	0.800403	0.795431	0.808002	0.798949	0.771458	0.764546	0.758916	0.747823	0.763657	0.738172	0.765551	0.751701	0.752951	0.758207	0.750968	0.755585	0.755701	0.763206	0.753101	0.766277	0.755973	0.75337	0.766422	0.758324	0.742227	0.74934	0.752959	0.752918	0.748906	0.771598	0.770232	0.786435	0.779605	0.785392	0.775824	0.794472	0.806345	0.789132	0.807875	0.781567	0.798618	0.797937	0.801638	0.782896	0.838171	0.777043
0.977315	0.988553	0.996876	0.973077	0.948883	0.968814	1.00353	0.955418	0.958116	0.968603	0.960753	0.969963	0.966093	0.947464	0.957023	0.965606	0.959916	0.970713	0.955663	0.958145	0.961501	0.958194	0.944243	0.947992	0.95514	0.955169	0.961277	0.943835	0.95199	0.947246	0.935658	0.930903	0.948328	0.934912	0.943397	0.929057	0.923361	0.92972	0.909199	0.915612	0.920847	0.938065	0.924359	0.918516	0.905632	0.900274	0.930503	0.931563	0.917543	0.9006
									2.58054	2.44582	2.32447	2.25583	2.19114	2.33926	2.22619	2.27544	2.1481	2.08845	2.1911	2.21073	2.22458	1.91106	1.96641	2.31428	2.62036	2.8435	3.10818	2.67674	3.02314	2.61567	2.79737	3.0062	3.14869	2.23544	1.88045	2.26316	2.43632	2.50286	2.33825	2.96371	2.56077	2.49485	2.43224	2.37269	2.98039	3.47338	2.41394	3.76333	2.05159
0.536743	0.56338	0.558059	0.563996	0.552144	0.583732	0.567449	0.541337	0.542673	0.525763	0.530668	0.506219	0.553944	0.580887	0.585039	0.553792	0.55652	0.582879	0.572125	0.580101	0.583566	0.576023	0.588704	0.603884	0.592067	0.58027	0.59179	0.588905	0.570797	0.590854	0.583139	0.583431	0.608095	0.608414	0.584811	0.593853	0.588961	0.60418	0.592649	0.601148	0.578561	0.560428	0.579727	0.588911	0.578554	0.587218	0.586922	0.592602	0.582	0.568933
0.81508	0.806581	0.796223	0.796059	0.789265	0.770026	0.77662	0.788447	0.782467	0.770238	0.758548	0.755681	0.765785	0.743703	0.734188	0.731808	0.717362	0.706508	0.709757	0.703611	0.693851	0.707414	0.697005	0.681823	0.692767	0.67866	0.67583	0.663162	0.667319	0.677533	0.663406	0.680968	0.676129	0.675265	0.657501	0.656359	0.655423	0.645899	0.65104	0.64583	0.658959	0.667125	0.656767	0.660316	0.659928	0.661201	0.663028	0.660178	0.68095	0.670271
1.19094	1.2083	1.16174	1.12933	1.13214	1.16398	1.18811	1.17812	1.19493	1.19386	1.20866	1.18452	1.18109	1.18198	1.18248	1.16414	1.16509	1.17184	1.20069	1.15485	1.18009	1.17242	1.17728	1.15928	1.13995	1.18933	1.13899	1.21289	1.20144	1.21858	1.19338	1.21557	1.2226	1.22977	1.26214	1.23658	1.23748	1.24918	1.27771	1.23812	1.22568	1.23452	1.21876	1.22679	1.25692	1.25051	1.28723	1.23659	1.22264	1.2232
0.612922	0.633225	0.631006	0.638016	0.639054	0.655713	0.648243	0.63565	0.676679	0.658419	0.648591	0.654079	0.64857	0.642754	0.647386	0.631323	0.634398	0.637503	0.64024	0.647741	0.628077	0.626237	0.630281	0.628514	0.647486	0.6275	0.62183	0.627612	0.634391	0.624185	0.638087	0.637485	0.65511	0.648478	0.638635	0.656748	0.63567	0.639032	0.633808	0.637252	0.644369	0.655866	0.631833	0.63825	0.635048	0.631791	0.631322	0.633222	0.6413	0.626164
1.446	1.43603	1.48487	1.4992	1.48554	1.42081	1.50591	1.46597	1.47365	1.47776	1.41943	1.38514	1.37931	1.41422	1.40186	1.44911	1.40181	1.44698	1.44664	1.39293	1.44159	1.46295	1.44684	1.50039	1.47316	1.35679	1.42659	1.35607	1.40229	1.39346	1.47287	1.41041	1.43581	1.44814	1.45265	1.38128	1.42118	1.4602	1.38156	1.36561	1.44834	1.43447	1.45062	1.40057	1.39301	1.40187	1.43561	1.41854	1.35872	1.38302
1.26587	1.22586	1.25614	1.26968	1.26687	1.27898	1.31352	1.26391	1.23498	1.2513	1.27959	1.26296	1.28837	1.29442	1.2886	1.30341	1.26826	1.2675	1.29592	1.30211	1.3209	1.25826	1.30649	1.23217	1.23582	1.22939	1.27986	1.24161	1.27549	1.22982	1.23	1.19802	1.24542	1.24667	1.20984	1.22523	1.2266	1.1708	1.13699	1.15995	1.17244	1.15131	1.12567	1.08867	1.10926	1.02906	1.07957	1.06223	1.05536	1.04462
0.929404	0.798576	0.935673	0.946676	0.872428	0.865556	0.964491	0.925477	0.941499	0.997886	0.996888	0.988777	0.898343	0.968473	1.00138	0.996786	0.998976	1.06204	1.06568	0.985685	1.05089	1.0734	0.978291	1.00672	1.03685	1.06884	0.867912	0.957981	0.802667	0.690689	0.78741	0.966936	0.981917	0.974785	0.96248	0.950481	0.938778	0.97794	0.993411	0.986128	0.970009	1.02116	0.892719	0.957082	0.953762	0.950464	0.94719	0.960204	0.954096	0.96838
1.05592	1.06032	1.05608	1.07111	1.07634	1.08161	1.07401	1.09924	1.09304	1.09705	1.09325	1.08496	1.11829	1.02544	1.10877	1.09324	1.09718	1.11317	1.10466	1.09024	1.07272	1.08189	1.09925	1.08986	1.07542	1.0816	1.07441	1.07811	1.08878	1.09859	1.1107	1.12093	1.12671	1.12882	1.124	1.13004	1.09473	1.10355	1.09531	1.08936	1.08981	1.10084	1.08546	1.0605	1.07286	1.08245	1.06815	1.05372	1.07192	1.04131
0.769396	0.745279	0.748227	0.720142	0.695922	0.694425	0.729891	0.773689	0.754979	0.769984	0.790433	0.786236	0.781538	0.758086	0.770527	0.745713	0.748888	0.800885	0.751639	0.737272	0.741697	0.691582	0.747495	0.737249	0.733524	0.76454	0.712406	0.680159	0.686094	0.641068	0.649494	0.711538	0.73589	0.756298	0.659654	0.779905	0.73628	0.739957	0.756814	0.768726	0.756629	0.779766	0.806991	0.804595	0.785182	0.787438	0.791543	0.804183	0.795993	0.801539
1.52187	1.62709	1.59642	1.59719	1.55002	1.48227	1.51611	1.43928	1.45062	1.5593	1.51396	1.46321	1.4905	1.44088	1.46866	1.4335	1.39703	1.44289	1.43663	1.28128	1.26771	1.30298	1.24936	1.24867	1.22827	1.23789	1.24489	1.2095	1.26735	1.27234	1.28023	1.27691	1.24788	1.31004	1.3295	1.28279	1.18631	1.19478	1.1948	1.19909	1.18421	1.1697	1.14279	1.07685	1.09147	1.07025	1.09469	1.07783	1.00838	1.02151
0.873539	0.870887	0.867937	0.846384	0.856814	0.863044	0.852894	0.867336	0.904912	0.88817	0.867205	0.871483	0.86317	0.862583	0.879837	0.867135	0.841682	0.826026	0.810696	0.829911	0.821207	0.825476	0.840348	0.795298	0.811616	0.806393	0.806701	0.80701	0.781833	0.783211	0.772747	0.763217	0.75819	0.773227	0.780499	0.762786	0.773423	0.774699	0.757705	0.7718	0.737939	0.755666	0.748859	0.750925	0.74574	0.733397	0.735027	0.727517	0.71995	0.726884
3.63208	2.31294	2.46003	2.03865	1.74052	1.51846	1.34665	1.34153	1.1973	1.2768	1.34962	1.05333	1.30676	1.23798	0.956489	0.779293	0.883445	1.01973	1.01861	0.837799	0.914149	1.00581	1.27173	1.2808	1.29001	1.11113	1.22754	1.72242	1.63449	1.77563	1.84799	2.02373	2.21415	2.35495	2.22769	2.24182	2.46402	2.39119	2.50393	2.55661	2.91304	3.33619	4.3471	3.34642	4.31083	5.01109	5.80282	5.26162	5.40372	5.3553
0.828225	0.794886	0.819458	0.803708	0.796931	0.80329	0.791146	0.80764	0.797659	0.821503	0.77172	0.77352	0.767052	0.77624	0.776993	0.763984	0.746184	0.735348	0.762623	0.765929	0.740699	0.774814	0.760736	0.751467	0.746129	0.766124	0.766714	0.750577	0.704628	0.705672	0.725534	0.729592	0.733863	0.738945	0.708036	0.716558	0.682729	0.70794	0.71285	0.682997	0.69714	0.709515	0.701501	0.698682	0.682381	0.682216	0.722234	0.694562	0.706886	0.715105
0.954778	0.992036	0.999042	1.00414	1.00937	1.01777	0.966119	0.966797	0.991262	1.03601	1.02975	1.03442	0.989036	1.00404	1.03422	0.995017	0.99196	0.995133	0.994626	1.00176	0.986499	0.980306	0.981983	0.967483	0.976399	0.979585	0.969752	0.955003	0.991151	0.992836	1.00015	1.00984	0.984371	0.977449	1.00461	0.996745	1.00253	0.98011	1.00342	0.941624	0.971254	0.973019	0.967351	0.950722	0.959618	0.960811	0.950376	0.943764	0.933735	0.936691
1.05775	1.03536	1.05005	1.03899	1.05562	1.05522	1.06622	1.03418	1.04742	1.05755	1.04053	1.0401	1.00434	1.00671	0.995842	1.0007	1.00342	1.01655	1.00492	1.00696	0.968607	0.984777	0.977428	0.935883	0.959812	0.932526	1.00574	0.971247	0.927447	0.964779	0.912575	0.994821	0.963297	0.99069	0.953146	0.932454	0.932863	0.946431	0.905892	0.918444	0.918351	0.910525	0.886441	0.884739	0.902969	0.916813	0.886801	0.877677	0.861356	0.873849
1.78798	1.8542	1.83158	1.66365	1.7474	1.81439	1.9099	1.87516	1.85141	1.83255	1.70472	1.59355	1.55656	1.52124	1.4875	1.587	1.51033	1.75457	1.57013	1.50749	1.50383	1.35806	1.38518	1.4134	1.55829	1.57219	1.47087	1.49157	1.38514	1.34937	1.39807	1.45042	1.50685	1.56784	1.63398	1.65692	1.68051	1.61375	1.64868	1.70125	1.69619	1.69116	1.67191	1.67212	1.5943	1.62869	1.6646	1.68024	1.65674	1.63389
0.807984	0.824214	0.828139	0.824318	0.828064	0.806465	0.827633	0.814677	0.81787	0.804576	0.7924	0.794555	0.801605	0.787239	0.787597	0.762361	0.776396	0.778747	0.759987	0.755626	0.782054	0.782113	0.761488	0.767443	0.781543	0.751013	0.765458	0.767092	0.774543	0.760348	0.734547	0.748614	0.762335	0.764826	0.757099	0.746521	0.724184	0.736112	0.696216	0.713558	0.698684	0.695116	0.680711	0.688318	0.698941	0.696476	0.683482	0.693508	0.669844	0.683784
0.548892	0.544519	0.543006	0.560349	0.548067	0.547647	0.548064	0.54188	0.555792	0.555948	0.54203	0.533113	0.545007	0.533777	0.54299	0.5491	0.535205	0.542701	0.525472	0.539511	0.536227	0.538904	0.545711	0.549944	0.536302	0.547554	0.544075	0.547567	0.538443	0.542483	0.540696	0.54216	0.559188	0.547473	0.544832	0.552175	0.541511	0.533185	0.533817	0.539752	0.537935	0.541049	0.538158	0.528852	0.530735	0.531923	0.523233	0.526078	0.527547	0.521015
0.693484	0.690212	0.666062	0.725227	0.68917	0.656544	0.669979	0.654853	0.671574	0.662793	0.658237	0.644574	0.644533	0.645305	0.641966	0.661261	0.662506	0.624118	0.635281	0.617737	0.62337	0.619662	0.657067	0.636243	0.622314	0.669885	0.655498	0.641716	0.648296	0.650005	0.607147	0.621684	0.615177	0.595595	0.604532	0.611196	0.630943	0.632234	0.615149	0.601916	0.617282	0.634595	0.610098	0.642467	0.663551	0.636157	0.614179	0.607824	0.613356	0.619068
1.2563	1.20361	1.17958	1.15244	1.15135	1.16765	1.12845	1.12859	1.1372	1.12832	1.1049	1.0669	1.0819	1.06491	1.0791	1.07219	1.05323	1.06695	1.06964	1.06657	1.07525	1.07718	1.08466	1.06607	1.08216	1.10419	1.06701	1.07616	1.05845	1.07694	1.07526	1.0962	1.13627	1.09329	1.12241	1.09969	1.11287	1.10759	1.10274	1.11908	1.11972	1.11287	1.09859	1.09175	1.09013	1.0876	1.07223	1.04988	1.08066	1.08403
1.08027	1.02129	1.03011	1.00043	0.997675	1.01846	1.02212	0.932185	0.895013	0.938354	0.977706	0.893456	0.921828	0.917483	0.929487	0.933835	0.900912	0.916534	0.919495	0.992156	0.947601	0.991649	0.951085	0.91342	0.939873	0.983605	0.941149	0.998475	1.01737	0.971577	1.00295	1.00041	1.04131	1.03624	1.03727	1.07947	1.02663	1.01268	1.03522	0.95016	1.03497	1.00239	0.985749	1.02357	0.992579	0.99346	0.997983	1.01298	1.0404	0.99711
0.888018	0.877728	0.896045	0.889467	0.879351	0.864852	0.883329	0.868275	0.881278	0.877217	0.844284	0.848372	0.860984	0.879037	0.82115	0.830922	0.820249	0.837412	0.808487	0.811394	0.791269	0.792568	0.820273	0.818652	0.806036	0.772869	0.831833	0.824759	0.831703	0.815462	0.824001	0.798741	0.846135	0.824602	0.83647	0.825099	0.801223	0.856015	0.770906	0.817657	0.817219	0.765393	0.834972	0.791064	0.783461	0.769041	0.784782	0.775117	0.750444	0.742146
1.1343	1.15946	1.29327	1.07499	1.21979	1.16665	1.25825	1.2154	1.22703	1.25639	1.16155	1.14629	1.04857	1.10228	1.17373	1.1136	1.18042	1.15342	1.14979	1.14675	1.15906	1.1915	1.19711	1.21105	1.20321	1.1851	1.19722	1.15597	1.18371	1.15649	1.16413	1.13677	1.20424	1.1941	1.18414	1.12569	1.15603	1.12248	1.11218	1.12111	1.08413	1.04951	1.03538	1.0261	1.00736	0.983586	0.951841	0.982409	0.868797	0.876065
0.958252	0.952967	0.96677	0.938406	0.953705	1.19507	0.922975	0.939491	0.9194	0.929515	0.939855	0.89339	0.941505	0.905541	0.88122	0.879519	0.864348	0.861367	0.874266	0.990397	0.859906	0.861195	0.860806	0.862172	0.994965	0.879231	0.883364	0.887004	0.919652	0.922385	0.928797	0.957888	0.977482	0.983147	0.992519	1.04915	1.0915	1.05861	1.15793	1.12018	1.14272	1.136	1.07494	1.15914	1.12789	1.22781	1.20971	1.24787	1.28854	1.17653
0.866717	0.844675	0.856043	0.852456	0.862273	0.874377	0.851835	0.832997	0.842291	0.823295	0.779033	0.831181	0.816531	0.77873	0.804718	0.832803	0.819621	0.812612	0.812367	0.810449	0.786277	0.841275	0.81183	0.750794	0.785462	0.810297	0.767631	0.789637	0.769923	0.716804	0.757505	0.798877	0.764996	0.823938	0.777389	0.782299	0.755471	0.71246	0.802633	0.723894	0.71322	0.670352	0.764178	0.740728	0.722659	0.757618	0.724079	0.700753	0.648358	0.700685
1.08101	1.0397	1.10396	1.03784	1.09043	1.06224	1.09515	1.08914	1.08689	1.10519	1.09315	1.06539	1.08523	1.07717	1.08163	1.13209	1.13443	1.12315	1.11289	1.12351	1.11879	1.16519	1.14456	1.1786	1.1005	1.12168	1.14855	1.15674	1.18047	1.14126	1.1943	1.19231	1.18596	1.18002	1.14526	1.14185	1.09955	1.16209	1.12933	1.1496	1.13169	1.10792	1.10564	1.12636	1.06138	1.04775	1.05317	1.17141	1.05383	1.06032
0.77858	0.809566	0.784215	0.798847	0.77722	0.793975	0.810369	0.828156	0.819903	0.842902	0.830006	0.827542	0.847788	0.839729	0.821164	0.828788	0.833492	0.842589	0.835432	0.829619	0.839626	0.827242	0.844371	0.815623	0.801017	0.818851	0.825151	0.817444	0.810147	0.850839	0.847428	0.823754	0.821004	0.809115	0.823344	0.81506	0.806941	0.803608	0.796145	0.802647	0.783642	0.778381	0.780508	0.773268	0.833856	0.768883	0.788627	0.771202	0.768379	0.767514
0.932425	0.970418	0.900103	0.884739	0.91466	0.8258	0.828206	0.821839	0.795402	0.75635	0.844239	0.850452	0.844665	0.998229	1.01551	0.965341	1.03792	0.982646	1.00992	1.04467	0.972725	0.998526	1.15101	1.03851	1.18265	1.13688	1.2349	1.10342	0.952146	0.934194	0.943481	0.997032	1.00136	0.975994	1.01852	1.03825	0.966652	0.981388	0.990528	0.966355	0.977176	1.04155	1.00477	0.970506	0.938498	0.956958	0.989764	1.00422	0.883791	0.858539
0.706464	0.678288	0.663396	0.673819	0.668313	0.669502	0.662975	0.646172	0.665045	0.650729	0.667323	0.635825	0.635323	0.644131	0.626228	0.624097	0.628954	0.612516	0.644288	0.632823	0.619211	0.623657	0.609992	0.629218	0.616261	0.615762	0.606161	0.61211	0.618842	0.615466	0.589314	0.598932	0.639134	0.632437	0.63055	0.629469	0.613643	0.617023	0.640366	0.641409	0.623423	0.631524	0.625796	0.61488	0.616882	0.612434	0.594645	0.615927	0.591313	0.611237
0.801366	0.80515	0.795176	0.810599	0.801742	0.79224	0.780479	0.7911	0.787659	0.799143	0.766735	0.775726	0.75495	0.761555	0.772264	0.751796	0.750664	0.74954	0.715049	0.725015	0.74007	0.710729	0.723821	0.712064	0.71906	0.726194	0.714959	0.714674	0.719702	0.720149	0.730551	0.704719	0.712747	0.719627	0.733178	0.737213	0.720312	0.767889	0.74647	0.703322	0.734756	0.72247	0.74777	0.716479	0.729917	0.74019	0.729102	0.699811	0.723287	0.7264
1.27583	1.28022	1.27385	1.28445	1.25556	1.25601	1.24178	1.2838	1.28932	1.23111	1.27096	1.27738	1.29377	1.28049	1.26749	1.25475	1.24226	1.205	1.22371	1.24302	1.25762	1.24476	1.25221	1.25976	1.2674	1.28916	1.25445	1.29036	1.27262	1.2565	1.27833	1.27308	1.25829	1.27601	1.2653	1.23869	1.23022	1.24324	1.22709	1.26633	1.18148	1.24451	1.22595	1.24448	1.30649	1.257	1.24807	1.23148	1.28921	1.21116
1.52921	1.49252	1.48632	1.58128	1.6078	1.53311	1.52261	1.57582	1.7157	1.62178	1.59022	1.4846	1.74997	1.80376	1.75177	1.68714	1.78942	1.71119	1.52354	1.62495	1.66945	1.45285	1.53371	1.49238	1.58969	1.52402	1.47506	1.72181	1.65099	1.6291	1.734	1.73526	1.63498	1.65362	1.67271	1.61093	1.51158	1.58658	1.68395	1.65731	1.61964	1.62924	1.60087	1.61501	1.66338	1.59361	1.47039	1.56937	1.71648	1.43334
0.562915	0.557262	0.560916	0.55715	0.56089	0.550059	0.559771	0.564929	0.539346	0.553421	0.546543	0.559837	0.556907	0.550196	0.543991	0.540417	0.538401	0.54	0.524408	0.531009	0.523629	0.514275	0.526849	0.525236	0.519648	0.527728	0.52515	0.516582	0.512382	0.518127	0.527564	0.536845	0.520978	0.517892	0.518465	0.512793	0.517946	0.51953	0.520356	0.521227	0.505521	0.503322	0.503334	0.503346	0.503358	0.50337	0.503382	0.503394	0.503406	0.503418
2.10426	2.16818	2.39956	2.45319	2.53416	2.62067	2.71329	2.81269	2.91966	2.90355	2.88762	2.87186	2.85628	2.84086	2.7862	2.73361	2.68297	2.63416	2.58711	2.5417	2.32136	2.13618	1.97836	1.84225	1.93811	2.0445	2.16324	2.29663	1.95691	1.76438	2.35311	3.53151	3.96529	3.6459	3.92793	3.8283	3.9391	3.81955	3.70704	3.60098	2.61682	3.51879	3.51767	3.35064	3.3484	3.2423	3.34177	2.88855	3.24662	3.35834
0.594921	0.578572	0.585713	0.571698	0.579402	0.573869	0.573058	0.573106	0.563005	0.554453	0.548691	0.549804	0.561705	0.541283	0.559164	0.572238	0.579962	0.589064	0.58733	0.597359	0.587553	0.599316	0.574354	0.589985	0.588463	0.604552	0.591198	0.584799	0.602827	0.603741	0.630168	0.642312	0.651526	0.639833	0.641304	0.627605	0.624004	0.607564	0.603873	0.608231	0.610685	0.601909	0.594892	0.599591	0.620433	0.623286	0.630231	0.62755	0.603461	0.63476
0.568382	0.554451	0.567059	0.561878	0.564847	0.571448	0.561296	0.5663	0.563252	0.565268	0.561871	0.560112	0.567095	0.561033	0.559848	0.552692	0.552878	0.552251	0.553635	0.544482	0.548046	0.559223	0.560051	0.55375	0.555575	0.545647	0.550561	0.56699	0.562584	0.566803	0.568309	0.571832	0.560334	0.563333	0.568687	0.56561	0.564882	0.577944	0.569754	0.584409	0.581448	0.578782	0.580352	0.578439	0.578285	0.578086	0.580206	0.578281	0.579472	0.581228
0.595378	0.598604	0.610775	0.594406	0.597294	0.599194	0.613803	0.617317	0.62263	0.638081	0.634115	0.623417	0.636832	0.63727	0.60507	0.62151	0.631478	0.604831	0.638857	0.628005	0.635029	0.621075	0.640887	0.634466	0.623424	0.60344	0.608663	0.597077	0.580815	0.60714	0.601697	0.613841	0.635351	0.621089	0.607304	0.615789	0.603931	0.617363	0.631134	0.622122	0.625487	0.628888	0.626236	0.623606	0.611627	0.625894	0.630934	0.613099	0.63186	0.608941
0.731833	0.751722	0.703082	0.743221	0.727067	0.739904	0.735635	0.732453	0.743471	0.73847	0.73881	0.735518	0.731683	0.726567	0.721943	0.718118	0.713649	0.730881	0.731274	0.721503	0.730065	0.715417	0.730634	0.712004	0.767598	0.720147	0.749581	0.75113	0.727625	0.755371	0.764879	0.809046	0.783779	0.780197	0.753112	0.791276	0.761113	0.793116	0.820589	0.844629	0.804572	0.817617	0.828938	0.8049	0.796378	0.853653	0.846006	0.793371	0.849465	0.795086
0.647809	0.635804	0.64416	0.632127	0.611496	0.626056	0.620241	0.624267	0.650674	0.65836	0.618731	0.621337	0.628143	0.640815	0.631502	0.613205	0.627417	0.615118	0.624489	0.611403	0.616308	0.645115	0.663344	0.636445	0.673273	0.679075	0.699754	0.698927	0.67942	0.697069	0.663724	0.740079	0.745213	0.743522	0.724989	0.711424	0.689588	0.676918	0.673957	0.646325	0.64386	0.684626	0.642795	0.652118	0.655334	0.61989	0.638146	0.649391	0.614015	0.662339
1.45359	1.38947	1.30097	1.3704	1.44937	1.4078	1.43121	1.52853	1.48334	1.49306	1.38978	1.17278	1.48751	1.392	1.36242	1.38965	1.34468	1.38063	1.44226	1.41806	1.36291	1.43335	1.51147	1.5162	1.28099	1.27801	1.26589	1.39119	1.53381	1.39962	1.42413	1.29424	1.16725	1.19999	1.14765	1.28822	1.26807	1.25659	1.23916	1.23262	1.25871	1.36361	1.38426	1.34018	1.23695	1.23107	1.12808	1.17492	1.13919	1.05485
1.24268	1.29261	1.27231	1.21026	1.22253	1.20547	1.21866	1.19538	1.21322	1.20126	1.19448	1.22841	1.19842	1.17213	1.2235	1.19611	1.18727	1.19701	1.19867	1.1828	1.18385	1.21162	1.22686	1.21019	1.21287	1.23308	1.21203	1.19937	1.22067	1.19845	1.19956	1.19439	1.18235	1.15999	1.16131	1.16286	1.16095	1.17376	1.16057	1.18838	1.14839	1.16612	1.16813	1.17018	1.17946	1.18222	1.16943	1.174	1.17623	1.175
0.581693	0.590146	0.573129	0.611355	0.615249	0.615101	0.645112	0.611614	0.60297	0.62573	0.59166	0.623708	0.597925	0.587905	0.609407	0.656264	0.645158	0.629702	0.613129	0.648339	0.618403	0.634694	0.639236	0.640416	0.649498	0.630393	0.640779	0.654096	0.631471	0.636244	0.610914	0.712625	0.646415	0.743942	0.63723	0.620784	0.57509	0.629208	0.649464	0.688384	0.647944	0.678052	0.686832	0.650304	0.631022	0.638221	0.644929	0.606434	0.605543	0.620178
0.867927	0.786134	0.734569	0.689352	0.811488	0.772913	0.775749	0.778606	0.751124	0.824467	0.790674	0.740464	0.784975	0.796333	0.837323	0.822934	0.778741	0.824992	0.860703	0.797349	0.796618	0.755329	0.718109	0.684384	0.82102	0.80373	0.790266	0.747784	0.772397	0.790582	0.760795	0.808165	0.821949	0.826992	0.778831	0.792004	0.741347	0.774819	0.794348	0.780168	0.77905	0.789529	0.762034	0.773625	0.768312	0.763262	0.730823	0.736045	0.753836	0.765571
1.12284	1.11885	1.11305	1.1233	1.10329	1.09789	1.06415	1.07146	1.08543	1.0385	1.04338	1.00081	0.97955	1.01285	1.00505	0.988497	1.03117	0.993621	0.994183	1.01889	1.01213	1.00679	0.986509	0.997299	0.980865	0.985136	0.98693	0.945494	0.989688	0.98311	0.985929	0.991591	1.01294	0.986133	0.963753	0.981594	0.955586	0.946732	0.925918	0.93085	0.923213	0.90965	0.885265	0.895814	0.895244	0.894946	0.869416	0.824561	0.864122	0.826934
1.33683	1.76736	1.52238	1.3595	1.2281	1.11986	1.02916	1.09945	1.23407	1.40625	1.72799	1.88399	2.31732	2.11409	1.93933	1.68956	1.84965	1.83175	1.57718	1.84226	1.70015	1.57301	1.67887	1.79825	1.64846	1.5845	1.54623	1.66845	1.47239	1.59879	1.63557	1.60521	1.68856	1.34645	1.29857	1.53527	1.47854	1.80858	1.71157	1.94288	1.48842	1.49758	1.2046	1.45847	1.17598	1.10242	1.10395	1.34182	1.43695	1.37197
6.65234	6.80319	5.40423	9.18775	8.57927	8.59295	8.60668	8.62045	8.63426	8.64812	8.62977	8.61149	8.45217	8.29864	8.15059	8.00772	7.86978	7.73651	7.60768	7.48307	7.36247	7.40167	7.44129	7.48134	7.52182	7.23027	5.00811	4.56394	4.39928	4.81427	4.05392	4.13624	4.07137	4.86071	6.43418	4.60909	3.93883	4.46872	5.01791	9.52869	4.93591	9.35239	8.66327	9.6844	9.63595	8.62938	9.25307	9.22209	5.15921	9.04975
0.817133	0.811813	0.795456	0.786128	0.780474	0.7711	0.798192	0.786733	0.788595	0.755111	0.765533	0.759201	0.741333	0.733464	0.728086	0.725254	0.704059	0.704664	0.685513	0.669645	0.686885	0.674305	0.678315	0.683634	0.668451	0.710382	0.660929	0.677909	0.71057	0.689824	0.691774	0.683604	0.691997	0.723033	0.710851	0.711517	0.693403	0.682551	0.666854	0.681211	0.706508	0.711365	0.701664	0.684359	0.684363	0.670282	0.663542	0.683001	0.684881	0.693797
0.914853	0.808	0.955496	0.924776	0.89597	0.868905	0.840807	0.719186	0.628303	0.640829	0.639408	0.632527	0.661445	0.66171	0.660372	0.65904	0.657714	0.656393	0.65491	0.653434	0.66788	0.682162	0.697069	0.712641	0.675656	0.716063	0.792388	0.886925	0.87741	0.868097	0.85898	0.759439	0.680572	0.703516	0.728061	0.754381	0.782675	0.813174	0.846146	0.881905	0.920821	0.898336	0.95079	0.804696	0.75382	0.689144	0.703536	0.696107	0.6927	0.716136
																															0.818036	0.986053	0.912406	0.946124	0.982431	1.02164	1.06526	1.11277	1.11165	1.11053	1.10941	1.14802	1.11602	1.11395	1.12835	1.14387	1.15982	1.18192	1.12164
1.204	1.19692	1.14136	1.29874	1.22992	1.19198	1.21934	1.20126	1.23444	1.25198	1.21858	1.23132	1.24434	1.25763	1.2299	1.25002	1.27081	1.20038	1.13312	1.19476	1.26906	1.19326	1.23618	1.20685	1.27386	1.24128	1.22572	1.25472	1.19072	1.21028	1.15863	1.22709	1.30905	1.29945	1.36817	1.35207	1.44932	1.3351	1.34819	1.3343	1.33129	1.32595	1.25025	1.26517	1.28436	1.2479	1.24207	1.24526	1.381	1.28974
3.55174	3.38982	3.78534	3.61348	3.84196	3.58148	4.58876	4.01021	3.56121	3.76135	2.96663	3.42114	2.30019	3.72004	3.3914	2.98527	2.23873	2.96502	2.75698	3.55028	3.39713	3.38963	3.33758	3.26394	3.22732	3.04042	2.86322	3.37845	2.5191	2.79161	3.31496	2.58542	3.5827	2.75544	3.16811	3.10129	3.03723	2.97576	3.20783	2.78429	2.99766	2.83175	3.28084	3.03694	2.89813	2.7885	2.68686	3.01617	4.41694	3.95128
2.62578	2.75206	2.74186	2.51564	2.68104	2.70003	2.41094	2.6004	2.48253	2.72872	2.15002	1.84397	2.59642	2.48205	1.95458	2.36156	2.65693	2.29336	2.23736	2.06297	2.1461	2.2623	2.24969	1.88869	1.95115	2.27848	1.71935	1.3337	1.40706	1.4984	1.54669	1.17046	1.11259	1.17794	1.267	1.38344	1.21781	1.17626	1.19398	1.14097	1.16288	1.13017	1.25684	1.10428	1.14968	1.1171	1.19781	1.15265	1.16072	1.13275
1.2071	1.17872	1.24296	1.34028	1.2431	1.30447	1.32454	1.21504	1.17817	1.387	1.22287	1.20247	1.25995	1.37634	1.52086	1.43515	1.35858	1.50361	1.41055	1.46058	1.27611	1.36759	1.18707	1.39535	1.17487	1.33937	1.13329	1.30165	1.21	1.13041	1.06251	1.0888	1.11643	1.14549	1.18553	1.21595	1.12835	1.13111	1.08409	1.19667	1.13729	0.998948	1.08591	1.2332	1.25435	1.27625	1.29892	1.2962	1.21212	1.37033
0.65314	0.65646	0.641047	0.656636	0.651048	0.649966	0.66326	0.645363	0.639747	0.646878	0.649511	0.660482	0.674502	0.647037	0.683523	0.658015	0.661086	0.657365	0.64749	0.632154	0.644542	0.618806	0.60909	0.605039	0.603597	0.613303	0.603236	0.592889	0.608251	0.609778	0.613536	0.637589	0.63649	0.636291	0.634475	0.62866	0.614688	0.612113	0.625479	0.61448	0.622491	0.630785	0.624191	0.56392	0.614902	0.59699	0.626613	0.618157	0.615461	0.612172
0.572857	0.577809	0.594929	0.587798	0.592232	0.593006	0.60121	0.606203	0.602314	0.600465	0.603134	0.623836	0.594002	0.601665	0.606494	0.592056	0.611553	0.588933	0.597694	0.588093	0.587633	0.590473	0.597858	0.617435	0.604993	0.601821	0.604115	0.605236	0.602565	0.613935	0.589368	0.609908	0.616663	0.609626	0.590999	0.609718	0.629663	0.59656	0.598034	0.609281	0.597684	0.595478	0.623918	0.615	0.597389	0.617082	0.616232	0.621112	0.617452	0.639073
0.656013	0.654434	0.65301	0.662891	0.652629	0.638799	0.659231	0.673878	0.639931	0.636547	0.633199	0.629886	0.643806	0.644027	0.64425	0.642027	0.63982	0.637627	0.63545	0.634727	0.634007	0.633287	0.637592	0.641955	0.646379	0.650864	0.655412	0.660024	0.664701	0.62957	0.657308	0.63268	0.619464	0.622442	0.630035	0.644032	0.648162	0.643257	0.643086	0.666351	0.621643	0.650905	0.642721	0.615674	0.660562	0.62682	0.621678	0.651726	0.60591	0.601151
1.54043	1.39069	1.72129	1.64841	1.53133	1.42979	1.34087	1.26237	1.61523	1.64255	1.67082	1.38419	1.18151	1.30029	1.55714	1.58061	1.33434	1.35041	1.33613	1.32216	1.29238	1.23751	1.2287	1.24988	1.17822	1.26333	1.13487	1.24685	1.1005	1.05565	1.10758	1.13737	1.09846	1.15957	1.10942	1.06888	1.16346	1.08312	1.07997	1.09936	1.09501	1.16054	0.956619	1.17315	1.21421	1.25825	1.3056	1.32642	1.13179	0.986961
2.66614	2.42874	3.54756	1.89593	1.57259	1.59066	1.60915	1.65877	1.71155	2.13596	2.84023	4.34088	3.22787	3.26217	3.78899	2.87555	2.72003	2.58048	3.37923	2.53562	3.17532	2.51758	2.62305	2.77111	1.86763	1.75918	2.2989	2.00039	2.07164	1.97151	1.71232	1.68844	1.98896	2.31545	2.61681	2.93206	2.45425	2.25789	3.07629	3.00059	2.88464	2.93869	2.42102	3.22425	2.7535	2.79079	2.82912	3.14915	2.96786	3.12318
																													0.541728	0.583268	0.536822	0.525022	0.503098	0.538076	0.546714	0.611106	0.611905	0.612707	0.61351	0.614316	0.615124	0.615934	0.616746	0.61756	0.618377	0.619195	0.620016	0.620839	0.621664
0.628286	0.643837	0.67903	0.661493	0.683968	0.692562	0.696239	0.704544	0.683466	0.672908	0.712442	0.717066	0.722894	0.711752	0.715147	0.716477	0.682112	0.697072	0.728618	0.770472	0.732558	0.745959	0.755892	0.705931	0.731317	0.758098	0.732543	0.764079	0.749579	0.746515	0.749861	0.842073	0.923605	0.947104	0.933032	0.932871	0.915575	0.922658	0.935457	0.954947	0.964803	0.96345	0.940185	0.907144	0.873517	0.901977	0.902118	0.944519	0.987614	0.921215
0.797827	0.800199	0.800325	0.784514	0.787159	0.788529	0.784072	0.774049	0.777346	0.779041	0.787913	0.787732	0.797197	0.784919	0.785502	0.779842	0.783328	0.777442	0.764166	0.763878	0.752813	0.773573	0.755502	0.764146	0.757104	0.75218	0.741241	0.722117	0.722314	0.734792	0.743577	0.746017	0.771999	0.76249	0.75515	0.752442	0.749572	0.734306	0.730759	0.719582	0.721211	0.71456	0.712201	0.699308	0.706266	0.708657	0.709082	0.692711	0.707239	0.681506
0.920311	0.866382	0.835539	0.820723	0.839805	0.838205	0.891785	0.874151	0.79646	0.909594	0.789271	0.850041	0.842722	0.835527	0.828454	0.844769	0.83951	0.876362	0.845064	0.816949	0.825755	0.877474	0.876044	0.893273	0.863649	0.851782	0.865119	0.901413	0.890195	0.864789	0.847839	0.893421	0.851553	1.02618	1.0882	0.888688	0.944265	0.937497	0.930825	0.924248	0.824581	0.874017	0.857373	0.920468	0.93116	0.931525	0.886498	0.969993	0.990168	0.927515
0.790942	0.773206	0.765074	0.758959	0.768271	0.770843	0.767377	0.758859	0.756651	0.758385	0.743188	0.741913	0.734166	0.728534	0.718993	0.701549	0.698924	0.697646	0.698379	0.697924	0.690261	0.714004	0.70818	0.698236	0.699289	0.695749	0.702538	0.7196	0.719419	0.707614	0.705747	0.715813	0.740165	0.729771	0.749688	0.757467	0.764287	0.765764	0.785335	0.776724	0.763156	0.779905	0.778564	0.742616	0.764686	0.774165	0.783882	0.773069	0.758676	0.760436
																		0.606745	0.606342	0.605939	0.605537	0.605135	0.604734	0.604333	0.603933	0.603534	0.603135	0.613744	0.624734	0.610035	0.626759	0.612297	0.620184	0.633815	0.6473	0.652993	0.637913	0.639207	0.658278	0.652676	0.598847	0.627512	0.65906	0.676003	0.627555	0.668681	0.653159	0.662755	0.626758
1.05042	1.01015	1.01658	0.984466	1.02663	1.00885	1.02652	1.00643	1.03771	0.986578	1.00398	1.03583	1.02751	1.03374	0.994386	0.987767	1.00144	0.992484	0.998146	0.983625	0.955397	0.967612	0.975936	0.937307	0.957765	0.922854	0.919642	0.975028	1.00184	0.963354	0.951018	0.979016	0.997073	1.006	0.981278	0.985141	0.956068	0.986876	0.982695	0.983368	0.963856	0.959572	0.96585	0.946651	0.918914	0.92226	0.946735	0.936406	0.924728	0.915263
1.34722	1.38639	1.26031	1.26912	1.21426	1.27446	1.34095	1.39909	1.35442	1.65769	1.35743	1.37288	1.38466	1.39664	1.40883	1.28475	1.31738	1.3088	1.30034	1.29198	1.28373	1.27559	1.27495	1.35684	1.44998	1.25239	1.2829	1.31492	1.29827	1.23327	1.27975	1.32988	1.38409	1.44292	1.50696	1.72863	1.70939	1.52843	1.8084	1.54795	1.5	1.32874	1.61689	1.37306	1.68009	1.36811	1.48148	1.3703	1.37977	1.3745
1.29014	1.30976	1.31603	1.32237	1.32876	1.33522	1.32956	1.32396	1.30587	1.30362	1.27931	1.31274	1.37622	1.29135	1.30273	1.30814	1.27958	1.30833	1.33326	1.35076	1.32876	1.29988	1.33584	1.3084	1.32436	1.33672	1.29199	1.32246	1.30288	1.3069	1.32522	1.34642	1.36554	1.29185	1.32203	1.29391	1.30625	1.28896	1.32026	1.29243	1.31952	1.281	1.30048	1.26295	1.30209	1.28577	1.28459	1.29291	1.33465	1.26713
1.4931	1.49546	1.44232	1.5289	1.47927	1.50253	1.55249	1.51931	1.50275	1.50287	1.45869	1.47242	1.47013	1.48328	1.47258	1.51105	1.49531	1.52227	1.49715	1.50744	1.55052	1.62149	1.54114	1.54946	1.46291	1.54359	1.54131	1.43856	1.47449	1.47382	1.47314	1.39007	1.42694	1.51034	1.38419	1.39047	1.34568	1.33726	1.29702	1.32714	1.35869	1.32733	1.30685	1.287	1.29802	1.30924	1.33108	1.26153	1.23679	1.28545
1.81917	1.77387	1.83881	1.68809	1.6737	1.64981	1.74577	1.56819	1.63888	1.8451	1.70621	1.81925	1.64225	1.68134	1.55475	1.79373	1.74008	1.65875	1.67653	1.73194	1.71723	1.75824	1.75268	1.8029	1.77664	1.77806	1.76629	1.71825	1.78264	1.82888	1.73862	1.68299	1.80225	1.80596	1.72954	1.91987	1.83804	1.92424	1.72323	1.75537	1.88746	1.9466	1.8242	1.79838	1.83511	1.8419	1.72837	1.67841	1.5832	1.65497
1.19166	1.19485	1.16312	1.19229	1.16661	1.2081	1.19339	1.16599	1.15354	1.13523	1.14395	1.08271	1.09135	1.03528	1.03695	0.979994	0.973586	0.952876	0.957881	0.967179	0.955198	0.940088	0.891777	0.934763	0.905041	0.938441	0.903122	0.890872	0.877879	0.884982	0.841766	0.883167	0.88293	0.869707	0.869272	0.874527	0.873248	0.828836	0.848184	0.83107	0.833385	0.827627	0.839307	0.825507	0.811671	0.820345	0.798199	0.856351	0.838449	0.847567
0.59976	0.62412	0.616343	0.62671	0.630315	0.627409	0.619188	0.667885	0.646239	0.653634	0.6321	0.662995	0.645118	0.642616	0.648492	0.656994	0.673633	0.654225	0.65764	0.622998	0.662254	0.649255	0.638001	0.656746	0.644238	0.656432	0.639356	0.631593	0.64336	0.636592	0.650305	0.684283	0.684786	0.66767	0.671564	0.657334	0.666352	0.689372	0.681722	0.688147	0.680137	0.692939	0.669191	0.664269	0.665718	0.683632	0.672544	0.67193	0.697821	0.690189
0.75707	0.739962	0.753678	0.813644	0.780713	0.766198	0.801394	0.804466	0.800396	0.777922	0.827678	0.826386	0.790939	0.825444	0.805227	0.809096	0.753262	0.806091	0.807869	0.782605	0.771907	0.786561	0.764928	0.828124	0.75591	0.763482	0.767401	0.72855	0.71458	0.725773	0.704632	0.716467	0.738191	0.731475	0.730301	0.733288	0.723392	0.757017	0.802197	0.727269	0.707772	0.694724	0.707282	0.70046	0.728726	0.746186	0.685312	0.677312	0.669498	0.662213
0.81975	0.812271	0.801777	0.830696	0.812369	0.834788	0.840054	0.827794	0.781484	0.876713	0.894603	0.87307	0.872319	0.849187	0.848006	0.808198	0.808174	0.836279	0.82445	0.82761	0.830416	0.831469	0.844849	0.861718	0.843524	0.839521	0.835555	0.863928	0.853551	0.900613	0.885577	0.933821	0.92307	0.939187	0.924339	0.906017	0.909256	0.938704	0.93701	0.896759	0.928606	0.912215	0.905085	0.892768	0.942939	0.886662	0.908161	0.892339	0.877059	0.862293
0.779969	0.800791	0.800186	0.799071	0.799532	0.812392	0.817473	0.799111	0.8367	0.821476	0.817632	0.799416	0.838661	0.800342	0.804359	0.81112	0.801578	0.813207	0.84875	0.806129	0.820381	0.822589	0.824423	0.803457	0.819462	0.808222	0.784994	0.818138	0.807636	0.79553	0.804424	0.804616	0.801495	0.790772	0.790611	0.797349	0.784372	0.778603	0.773355	0.784096	0.776649	0.769097	0.773327	0.756765	0.752168	0.782196	0.769093	0.756239	0.767348	0.746562
1.2524	1.23291	1.23041	1.20422	1.22643	1.22319	1.24968	1.23139	1.22615	1.22593	1.25719	1.24421	1.24656	1.25772	1.22992	1.23332	1.19257	1.24902	1.19852	1.21449	1.22148	1.22297	1.16927	1.20197	1.23455	1.23128	1.23057	1.21218	1.24889	1.22718	1.2209	1.20258	1.22965	1.24895	1.24078	1.23187	1.2192	1.22658	1.16262	1.22255	1.20382	1.20001	1.2124	1.24605	1.209	1.21945	1.2362	1.19815	1.24642	1.25705
3.13442	3.75666	3.40077	3.55361	3.1381	2.11655	2.85557	4.42047	1.98952	1.28362	1.29755	1.23279	1.19226	1.70156	2.97044	1.83943	1.94556	2.20955	2.11095	2.91045	2.74348	2.07345	1.66645	1.39302	1.19667	1.15827	1.19648	1.15244	1.21371	1.28185	1.35811	1.14433	1.14459	1.14486	1.12069	1.53759	2.44839	1.48252	1.06312	1.06135	1.05958	1.05782	1.05607	1.04487	1.03995	1.04613	1.05239	1.05872	1.06514	1.07162
1.33746	1.33316	1.4078	1.3143	1.4527	1.30789	1.3344	1.27093	1.36179	1.38229	1.22734	1.34909	1.21848	1.28983	1.36962	1.37794	1.28809	1.31699	1.30305	1.29325	1.35796	1.39358	1.38366	1.33947	1.25347	1.42243	1.33118	1.30333	1.28285	1.27807	1.22425	1.24582	1.33072	1.31861	1.35734	1.24054	1.24025	1.25046	1.25397	1.23536	1.233	1.24741	1.20729	1.22172	1.23371	1.19626	1.23322	1.27019	1.26357	1.23301
0.922821	0.933337	0.95062	0.953324	0.922675	0.940217	0.941639	0.941037	0.910578	0.927965	0.905004	0.888447	0.893725	0.883016	0.903863	0.894005	0.924807	0.954895	0.925585	0.915448	0.893476	0.848731	0.836139	0.909071	0.821368	0.905621	0.887593	0.872109	0.883978	0.920467	0.922325	0.915619	0.93248	0.937147	0.912093	0.936778	0.893754	0.863125	0.847441	0.899309	0.888391	0.836474	0.848747	0.83339	0.837705	0.82196	0.865756	0.879365	0.875115	0.884075
0.987458	0.968143	0.971384	0.958675	0.96437	0.964165	0.972593	0.984206	0.977945	0.974553	0.973852	1.00661	1.01984	0.994907	1.01681	0.994007	1.01249	0.961131	0.99379	0.942029	0.935572	0.92654	0.96007	0.920564	0.908451	0.913868	0.900444	0.885081	0.8828	0.900325	0.879695	0.879267	0.890798	0.902638	0.911099	0.887996	0.891029	0.859914	0.8309	0.836816	0.842818	0.886992	0.869416	0.852524	0.852005	0.851486	0.871265	0.832159	0.809544	0.825338
1.09326	1.05874	1.06053	1.02776	1.02678	0.929835	0.952371	1.01834	0.97474	1.00074	1.06782	0.960276	0.961102	0.993266	0.891637	0.946557	1.00711	1.00476	0.937529	0.995737	0.96311	0.944261	1.01044	0.931283	0.97887	0.981805	1.02989	0.996649	0.990867	0.99811	0.997508	1.03785	0.974412	1.01501	0.96686	0.988721	0.993616	0.949752	0.962447	1.03258	1.06566	1.09247	1.06636	1.13272	1.13784	1.09223	1.18903	1.09851	1.13295	1.34312
0.700084	0.716516	0.708409	0.718644	0.705473	0.710363	0.712978	0.704673	0.716823	0.681281	0.684428	0.693895	0.69187	0.693343	0.694822	0.696307	0.697799	0.672253	0.665725	0.659322	0.68036	0.657352	0.663768	0.670311	0.676984	0.697284	0.673389	0.694041	0.682347	0.662302	0.664603	0.671967	0.702317	0.701371	0.703976	0.697679	0.669656	0.680096	0.657481	0.684053	0.673195	0.663614	0.654584	0.640772	0.673298	0.647844	0.655538	0.645341	0.659525	0.653983
0.985482	0.963993	0.993239	1.03416	1.02928	0.994053	1.06713	1.02713	1.05875	1.09238	1.066	1.04086	0.982508	1.04501	1.02686	1.01954	1.07341	0.998284	1.04565	1.01309	0.991394	1.01081	1.03101	1.02513	1.01931	1.01479	1.01113	0.999132	0.956919	0.95017	1.13243	1.06771	1.00999	1.00732	1.00868	0.984432	1.06901	0.963744	1.06028	0.877595	1.03877	1.03402	0.904293	0.916006	0.917746	0.915235	0.87794	0.919507	0.912533	0.943271
1.00732	0.951182	0.95442	1.16371	0.93878	1.13213	1.1157	1.07117	1.03007	1.0819	0.92152	0.92649	1.11489	1.03518	1.06635	1.26028	1.19254	1.13171	1.07678	1.02694	1.00765	0.956748	1.01967	0.969233	0.991826	1.0155	1.03331	1.02131	1.0096	1.00834	1.00709	1.00881	1.01219	1.0156	1.01904	1.0109	1.00288	0.994999	0.987237	0.996438	1.00581	1.01536	1.0251	1.03502	1.04514	0.968293	1.04781	1.05781	1.07487	1.17659
0.785678	0.768796	0.767409	0.761959	0.756586	0.771519	0.787053	0.803225	0.831931	0.837781	0.818071	0.802857	0.822446	0.793422	0.80246	0.807659	0.812926	0.818262	0.823668	0.816296	0.792264	0.782296	0.791674	0.764945	0.759762	0.754648	0.75085	0.755169	0.759538	0.754413	0.749357	0.739866	0.756784	0.774493	0.793051	0.790761	0.788485	0.786222	0.783972	0.78783	0.791727	0.795663	0.799638	0.803653	0.807709	0.772019	0.824019	0.832792	0.835456	0.887174
0.731546	0.714254	0.717449	0.714411	0.716801	0.715366	0.712372	0.709829	0.714925	0.716841	0.72199	0.683942	0.703035	0.709807	0.723759	0.70827	0.706654	0.691572	0.686106	0.707886	0.699707	0.702974	0.700066	0.712989	0.725932	0.707448	0.716025	0.698823	0.695253	0.694285	0.697507	0.713711	0.73537	0.734336	0.720475	0.741344	0.733887	0.715628	0.712534	0.721397	0.720489	0.71204	0.70824	0.718194	0.709544	0.718279	0.720003	0.716343	0.724251	0.715208
1.38614	1.43268	1.39021	1.44085	1.46408	1.31086	1.27489	1.33528	1.47264	1.34438	1.3722	1.42508	1.47993	1.448	1.4012	1.52557	1.38359	1.38226	1.47701	1.5165	1.48024	1.76887	1.68278	1.63797	1.74102	1.57338	1.6696	1.55227	1.43422	1.48542	1.43395	1.30414	1.42415	1.45707	1.28827	1.36779	1.42475	1.44864	1.3797	1.54212	1.86672	1.52351	1.86803	1.43382	1.43356	1.38116	1.22572	1.37098	1.23518	1.15909
3.46268	4.24402	3.37872	3.28023	2.93345	4.1243	4.05934	4.51747	4.07216	4.19321	2.74256	3.87735	3.91654	3.42095	3.50838	4.21661	3.54392	3.66264	3.77472	4.13778	4.15652	3.86901	3.67653	3.84354	3.85369	4.1397	3.86588	3.99451	4.01994	3.94334	4.57086	4.31226	4.22816	4.39321	4.08181	3.92676	3.82302	4.1574	3.80645	3.95544	4.15181	3.82935	3.95125	4.08117	4.04857	4.0907	3.82012	3.68729	3.56339	2.69776
0.888666	0.94255	0.853659	0.867468	0.86662	0.866494	0.890064	0.821859	0.844769	0.851878	0.953703	0.914499	0.908821	0.820287	0.853028	0.826323	0.836557	0.918007	0.775252	0.79682	0.799783	0.81406	0.791089	0.789917	0.771402	0.765703	0.773674	0.774679	0.743716	0.745936	0.74817	0.750417	0.752678	0.754952	0.75724	0.837289	0.790572	0.776776	0.763453	0.788669	0.815607	0.804929	0.756246	0.735023	0.71496	0.74471	0.777043	0.812311	0.764133	0.757893
0.861491	0.841455	0.814193	0.788643	0.747492	0.761077	0.755642	0.704269	0.72701	0.75127	0.730501	0.703275	0.731817	0.810812	0.801841	0.793066	0.814687	0.720645	0.73614	0.757713	0.796403	0.7828	0.768166	0.77216	0.776195	0.785245	0.794509	0.810028	0.822543	0.821573	0.85052	0.910167	1.00828	1.00156	1.0091	0.993684	1.0293	1.03911	1.01954	1.0537	1.09021	1.05631	1.03206	1.05756	1.03796	1.05389	1.01004	1.04028	1.04913	1.05132
1.05975	1.11047	1.0722	1.07967	1.05047	1.05629	1.07382	1.01203	1.11038	1.16408	1.12234	1.04619	1.14701	1.14054	1.12003	1.13364	1.20366	1.1987	1.14056	1.09456	1.1962	1.13123	1.22	1.14434	1.18886	1.13268	1.1733	1.19767	1.23405	1.28617	1.30281	1.16674	1.23116	1.21359	1.1902	1.3296	1.30581	1.23151	1.18428	1.2569	1.21308	1.23678	1.29396	1.28365	1.31642	1.09064	1.16751	1.25604	1.20472	1.15743
0.688836	0.683104	0.675223	0.665576	0.675243	0.694166	0.672113	0.663094	0.685164	0.64996	0.662635	0.670907	0.643989	0.705107	0.666058	0.668751	0.785778	0.749793	0.763978	0.778711	0.680792	0.705138	0.748117	0.707672	0.676356	0.670721	0.638036	0.650832	0.747277	0.685975	0.796139	0.750121	0.709133	0.686927	0.627874	0.7188	0.666307	0.634524	0.656891	0.68479	0.665562	0.662973	0.705959	0.7168	0.72798	0.737794	0.65944	0.65252	0.665424	0.616138
0.944001	0.98761	0.959555	0.954304	0.949111	0.95181	0.954524	0.97911	0.996837	0.976814	1.02494	0.962624	0.983535	0.97861	0.966044	0.954395	0.943023	0.939395	0.943103	0.94684	0.950607	0.961461	0.949273	0.918784	0.944144	0.938447	0.932819	0.915683	0.938591	0.929851	0.893145	0.935951	0.96605	0.968156	0.935328	0.925007	0.883896	0.90645	0.907829	0.895953	0.932691	0.945283	0.95822	0.891493	0.866224	0.86959	0.829476	0.876874	0.85115	0.840875
0.775094	0.79293	0.758913	0.767666	0.744338	0.77893	0.796088	0.765461	0.788415	0.765925	0.80421	0.751978	0.7944	0.766188	0.769669	0.75317	0.734124	0.745262	0.752554	0.778355	0.785918	0.761078	0.767685	0.781357	0.755678	0.769413	0.808072	0.778857	0.749081	0.758835	0.767574	0.798326	0.822866	0.804975	0.793691	0.763839	0.714509	0.723958	0.700564	0.760044	0.717237	0.687568	0.669634	0.724175	0.727987	0.761014	0.707258	0.685076	0.681875	0.710309
1.07893	1.11901	1.10376	1.11573	1.12672	1.1182	1.14713	1.1413	1.13322	1.16572	1.16936	1.20853	1.2449	1.19713	1.20833	1.21393	1.17762	1.27553	1.22729	1.29193	1.2325	1.256	1.22142	1.25099	1.19399	1.19501	1.20032	1.11984	1.1049	1.05528	1.05515	1.00509	1.09468	1.07485	1.01664	1.0367	1.00177	0.987012	0.975336	0.912436	0.92955	0.903998	0.802446	0.938489	0.881814	0.907494	0.962932	0.9374	0.931398	0.978647
0.907832	0.93007	0.884071	0.838777	0.858183	0.846247	0.834638	0.820271	0.822142	0.807675	0.827623	0.855408	0.834954	0.833147	0.807273	0.841501	0.810946	0.82239	0.846036	0.821475	0.835461	0.824568	0.813955	0.783869	0.844002	0.777387	0.786439	0.799857	0.771546	0.767705	0.756269	0.758696	0.75944	0.796793	0.795441	0.794092	0.833567	0.877171	0.775697	0.797169	0.797187	0.797204	0.774791	0.825934	0.80368	0.797662	0.771999	0.800299	0.770425	0.780817
1.53358	1.41933	1.25387	1.34983	1.51759	1.96875	1.47616	1.47728	1.48798	1.46637	1.42473	1.38288	1.49066	1.45382	1.41498	1.72309	1.35555	1.53447	1.45018	1.59085	1.62667	1.70074	1.75627	1.39261	1.58992	1.78199	1.71027	1.78451	1.81444	1.86626	1.89654	1.83948	1.58271	1.78377	1.74247	1.54297	1.77857	1.70568	1.86614	1.78925	1.71845	1.67856	1.74762	1.77308	1.79876	1.66146	1.66188	1.64701	1.6343	1.50115
0.996428	0.95024	0.93189	0.915811	0.911488	0.90437	0.89689	0.90247	0.881612	0.864876	0.854736	0.891381	0.885377	0.904881	0.905262	0.905571	0.895762	0.898961	0.892678	0.900275	0.894089	0.895593	0.873502	0.868261	0.87373	0.875217	0.873275	0.852833	0.832871	0.822622	0.839031	0.833852	0.734765	0.782675	0.83727	0.853071	0.835253	0.818165	0.75243	0.696472	0.726478	0.713127	0.700258	0.687845	0.688589	0.689334	0.690081	0.690829	0.797809	0.827499
0.580414	0.595121	0.570346	0.612903	0.59374	0.575739	0.55948	0.548151	0.56392	0.538479	0.550421	0.544349	0.573202	0.551475	0.561724	0.536151	0.549087	0.548071	0.531324	0.531854	0.550796	0.533188	0.568421	0.557042	0.595073	0.573764	0.572587	0.57466	0.566059	0.567388	0.615503	0.581111	0.619681	0.600243	0.620423	0.625969	0.597302	0.592255	0.605612	0.619585	0.56889	0.560702	0.590432	0.612181	0.547184	0.563059	0.579883	0.581285	0.613839	0.610882
0.799291	0.794401	0.788051	0.781803	0.808759	0.815111	0.790083	0.789572	0.801404	0.79426	0.79464	0.795019	0.795399	0.795779	0.799374	0.792611	0.800708	0.786306	0.812609	0.800858	0.789443	0.786768	0.782107	0.813684	0.808395	0.794897	0.781843	0.799759	0.790509	0.78147	0.784098	0.782159	0.781131	0.780105	0.779082	0.784562	0.79012	0.795757	0.763471	0.767183	0.770931	0.749066	0.729562	0.730331	0.731101	0.731873	0.732647	0.733422	0.734199	0.732964
0.907524	0.90933	0.803715	0.811948	0.917899	0.896631	0.872016	0.86531	0.80322	0.845642	0.778309	0.964796	0.926157	0.834778	0.843065	0.851518	0.822671	0.795715	0.770469	0.834874	0.837644	0.780405	0.72042	0.775504	0.824114	0.775	0.76228	0.935541	0.830412	0.746523	0.82218	0.9149	0.803516	0.820495	0.807544	0.792207	0.761655	0.712436	0.849342	0.779111	0.769406	0.714276	0.781886	0.724447	0.790854	0.764196	0.766261	0.756201	0.746401	0.738971
0.779669	0.825107	0.818292	0.848924	0.745227	0.740048	0.815806	0.886167	0.839134	0.845998	0.791084	0.808317	0.771163	0.800632	0.832443	0.856192	0.891563	0.850157	0.865327	0.836468	0.901533	0.838005	0.763517	0.743996	0.725449	0.707803	0.733602	0.721165	0.66378	0.614855	0.58183	0.629243	0.667963	0.681883	0.67774	0.63616	0.67194	0.649249	0.64333	0.65978	0.648623	0.653762	0.668444	0.667511	0.670726	0.668531	0.696707	0.686826	0.677221	0.692627
0.746224	0.742317	0.669606	0.756767	0.752896	0.683483	0.620912	0.699885	0.656054	0.674709	0.708063	0.722685	0.683679	0.67775	0.699101	0.721842	0.746113	0.692864	0.789174	0.69985	0.687716	0.732425	0.671678	0.716392	0.713829	0.739394	0.72267	0.805408	0.737447	0.760901	0.768893	0.743977	0.813001	0.779395	0.781656	0.737037	0.774373	0.853027	0.80749	0.809947	0.819497	0.829276	0.807793	0.787395	0.766957	0.778484	0.81946	0.749717	0.81214	0.799714
1.04509	1.06048	1.0839	1.10838	1.13399	1.16594	1.16129	1.21292	1.13356	1.13048	1.1391	1.11313	1.09507	1.07691	1.06988	1.04526	1.07413	1.17042	1.09424	1.08791	1.0914	1.13463	1.20148	1.14259	1.08515	1.13946	1.14838	1.10002	1.07656	1.11251	1.13655	1.24605	1.13085	1.17261	1.2235	1.20453	1.22267	1.23932	1.24677	1.14804	1.1427	1.1061	1.13399	1.09089	1.07579	1.11452	1.12772	1.12614	1.18518	1.16618
1.07065	1.14656	1.23406	1.33602	1.25347	1.18053	1.11561	1.19071	1.27664	1.18364	1.10327	1.39181	1.27797	1.37726	1.39508	1.28822	1.19657	1.34964	1.32084	1.3969	1.27905	1.27854	1.2166	1.34688	1.33277	1.24929	1.17565	1.1102	1.24778	1.21367	1.38346	1.36343	1.32329	1.35397	1.32562	1.29843	1.29799	1.31798	1.4037	1.50135	1.46318	1.58377	1.53495	1.41667	1.42319	1.25425	1.39818	1.65851	1.32521	1.33515
0.865291	0.843985	0.845214	0.863498	0.860117	0.87605	0.877184	0.881375	0.87398	0.90051	0.881947	0.89743	0.880626	0.891773	0.902668	0.897649	0.891638	0.874105	0.862946	0.857907	0.871708	0.854622	0.864865	0.870175	0.884066	0.890215	0.916452	0.909883	0.909987	0.903856	0.925133	0.932297	0.976124	0.968466	0.957741	0.996418	0.99577	0.998098	0.970716	0.959326	0.959537	0.964562	0.943834	0.924933	0.954757	0.974366	1.02259	1.00922	1.00853	0.996273
1.14755	1.49218	1.24692	1.34642	1.21277	1.41935	1.71075	1.82757	1.53593	1.2806	1.06869	1.10329	1.1402	1.17967	1.22197	1.29878	1.38589	1.48553	1.43193	1.39527	1.45158	1.39673	1.34588	1.29859	1.22985	1.5581	1.56553	1.88615	2.37193	1.79513	1.44398	1.20774	1.26823	1.7103	1.24242	1.37662	1.10063	1.12339	1.32555	1.26297	1.36988	1.78151	1.39802	1.46829	1.23211	1.27531	1.13682	0.999719	1.12266	1.03069
0.958012	0.981361	0.962738	0.951783	0.964106	0.946511	0.941093	0.98269	0.937543	0.967062	0.962017	0.945939	0.919683	0.946191	0.934379	0.923095	0.911521	0.896492	0.885786	0.879833	0.860888	0.888176	0.871941	0.849251	0.866185	0.882765	0.902014	0.903864	0.896394	0.890627	0.884202	0.834103	0.835261	0.843389	0.830503	0.883058	0.820072	0.82641	0.869263	0.804456	0.863125	0.843723	0.859705	0.847164	0.826696	0.849579	0.845692	0.812529	0.861707	0.815712
0.585424	0.568404	0.577718	0.563866	0.555523	0.556724	0.565174	0.550603	0.541382	0.541827	0.539837	0.538208	0.538096	0.542817	0.519064	0.533163	0.537456	0.528107	0.521126	0.536771	0.528629	0.52472	0.523036	0.523141	0.521596	0.527304	0.525119	0.514444	0.514069	0.515221	0.505788	0.523356	0.517345	0.529502	0.521712	0.51781	0.503195	0.507235	0.512067	0.506496	0.501046	0.509663	0.505036	0.513023	0.503056	0.502561	0.504693	0.506844	0.516484	0.516631
0.618783	0.570377	0.631674	0.614219	0.588	0.635955	0.633232	0.567859	0.554288	0.642155	0.627237	0.580726	0.629701	0.65492	0.597486	0.556243	0.542269	0.557152	0.5287	0.545617	0.582622	0.637945	0.55771	0.643516	0.575058	0.572406	0.557977	0.577006	0.584814	0.575756	0.557095	0.577853	0.561994	0.64819	0.558651	0.607682	0.571151	0.595712	0.540064	0.541391	0.555541	0.503826	0.539262	0.580059	0.601161	0.64539	0.560086	0.54434	0.533311	0.52272
0.684035	0.720105	0.689021	0.729671	0.723356	0.721709	0.722346	0.697513	0.663234	0.6443	0.619953	0.583303	0.565543	0.533332	0.532808	0.532285	0.531763	0.531242	0.530722	0.530202	0.529684	0.529167	0.528651	0.528136	0.527622	0.527109	0.526597	0.526086	0.525576	0.525067	0.524559	0.524052	0.523546	0.523041	0.522536	0.522033	0.521531	0.52103	0.52053	0.52003	0.519532	0.519034	0.518538	0.518042	0.517548	0.517054	0.516562	0.51607	0.515135	0.516788
2.90859	2.89482	2.81905	2.8753	2.96068	2.82065	2.88123	2.91789	2.97978	2.97038	3.05617	3.09095	3.0812	3.10504	3.20044	3.06686	2.98504	2.90747	3.32266	3.04167	3.04142	2.1222	2.92559	2.9361	3.10582	2.94455	2.95341	2.97346	2.86482	2.8409	2.92123	3.23524	3.03125	2.07312	3.12206	1.76584	2.3963	2.23049	3.14808	3.18431	3.24143	2.7527	2.89968	3.37864	2.97217	2.9952	1.99034	2.37016	2.35322	2.46641
0.595329	0.611923	0.625537	0.598655	0.621175	0.645455	0.671711	0.700193	0.687898	0.716367	0.710212	0.704162	0.698214	0.692366	0.696419	0.690112	0.684707	0.701727	0.661449	0.672734	0.684411	0.673039	0.662038	0.618793	0.658488	0.658569	0.61423	0.651936	0.640114	0.649504	0.649522	0.691936	0.740276	0.722848	0.730653	0.710717	0.69184	0.733097	0.848558	0.813642	0.794431	0.886766	0.824113	0.963632	1.12568	1.04256	0.970879	0.867063	0.894645	0.962766
0.770869	0.756833	0.773685	0.805531	0.768891	0.770016	0.760994	0.74437	0.749063	0.754756	0.739036	0.775144	0.75597	0.71237	0.736068	0.722746	0.714838	0.720386	0.703588	0.692116	0.672245	0.696804	0.666449	0.663095	0.663683	0.666699	0.661871	0.662198	0.666264	0.662772	0.708622	0.6506	0.698505	0.649125	0.652169	0.614652	0.691491	0.61446	0.614133	0.622362	0.609072	0.615349	0.61031	0.582836	0.581744	0.581516	0.607867	0.591722	0.605668	0.587315
1.42773	1.41025	1.36812	1.414	1.41903	1.35165	1.39754	1.53265	1.39314	1.47718	1.7285	1.452	1.48747	1.48096	1.39382	1.48343	1.85449	1.6102	1.7973	1.42288	1.3876	1.46947	1.48609	1.32399	1.36961	1.7588	1.42108	1.46394	1.53526	1.48298	1.37183	1.57408	1.56775	1.50768	1.41126	1.52942	1.50097	1.50123	1.37873	1.51686	1.44267	1.38333	1.39077	1.42959	1.79186	1.34719	1.36565	1.49344	1.26384	1.6713
0.593596	0.589897	0.593585	0.592923	0.579629	0.552768	0.573868	0.569638	0.567499	0.579892	0.553579	0.556302	0.558129	0.540661	0.572569	0.560634	0.56101	0.554855	0.565612	0.577197	0.579522	0.587256	0.599424	0.605276	0.596871	0.617866	0.611269	0.642545	0.654185	0.642022	0.615551	0.622895	0.641474	0.629149	0.654873	0.64754	0.621359	0.637606	0.628313	0.583624	0.623407	0.560547	0.631489	0.609191	0.57127	0.548217	0.509802	0.572399	0.567349	0.580538
0.75801	0.762854	0.76776	0.758886	0.750215	0.819152	0.856732	0.785142	0.724595	0.757455	0.775633	0.862353	0.788689	0.793458	0.801858	0.81997	0.847055	0.831484	0.725906	0.812484	0.840055	0.855091	0.882511	0.88427	0.870474	0.869306	0.924158	0.896583	0.853034	0.895779	0.895237	0.855586	0.953025	0.935898	0.841031	0.86438	0.894093	0.762707	0.775577	0.827475	0.777766	0.797072	0.760228	0.78736	0.785192	0.79984	0.755692	0.807001	0.784628	0.789173
0.727205	0.725246	0.71794	0.724212	0.709883	0.722782	0.711415	0.731751	0.731143	0.728065	0.722205	0.730695	0.736849	0.747664	0.721527	0.720603	0.726399	0.698439	0.703072	0.724295	0.720193	0.720102	0.732985	0.744011	0.722599	0.738132	0.7354	0.734061	0.717621	0.731065	0.727739	0.745751	0.744063	0.765094	0.750668	0.750195	0.749503	0.740878	0.747798	0.762043	0.747493	0.740951	0.754443	0.732976	0.723512	0.722458	0.718696	0.739976	0.708223	0.743915
0.928583	0.939842	0.905101	0.974972	0.964823	0.944843	0.966964	0.973891	0.979397	0.96558	0.994935	0.990071	0.999307	0.948525	0.966777	0.97612	0.991101	0.97484	0.974524	0.963531	0.969672	0.985805	0.961921	0.940043	0.942437	0.970602	0.955783	0.933524	0.954986	0.954246	0.953506	0.990435	1.01829	0.987064	0.96559	0.943855	0.94083	0.949708	0.958248	0.950677	0.947677	0.946678	0.946526	0.93379	0.936835	0.934198	0.931576	0.94091	0.907212	0.923596
1.70048	1.70323	1.68448	1.63236	1.68838	1.71639	1.6403	1.64273	1.66622	1.69039	1.71527	1.33154	1.52327	1.51197	1.58796	1.75562	1.70386	1.66036	1.64248	1.58596	1.32749	1.49638	1.7145	1.55659	1.51823	1.54358	1.5698	1.47195	1.45647	1.51344	1.56651	1.60251	1.6402	1.67972	1.59986	1.3669	1.58849	1.10482	0.846945	1.11339	1.62443	1.41232	1.61475	1.55123	1.49253	1.43811	1.47247	1.20598	1.21041	1.21487
															5.37922	5.42147	5.46438	4.93859	4.61054	4.37869	4.47691	4.57964	4.68719	4.79992	4.9182	4.91164	5.12904	4.72518	5.30815	4.95115	5.1743	5.41853	5.15792	5.14464	4.96268	3.5337	4.33225	4.82043	4.67756	4.94818	4.85558	4.86586	4.8695	4.74263	4.62221	4.50776	4.69933	4.90791	3.38477
0.947712	0.994386	0.985935	0.987074	1.00886	0.98848	1.02201	1.03639	1.01402	1.00167	0.984564	1.00087	0.98645	0.995821	1.10123	0.987706	1.14563	1.14276	0.992239	1.00443	1.0496	1.05293	1.03867	1.04251	1.06215	1.05074	1.0376	1.02478	1.05409	1.03634	1.12533	1.0125	1.00127	0.990717	0.991406	0.985189	0.998322	1.01181	1.01431	1.01114	1.00494	1.00988	1.01486	1.00462	1.01367	1.00601	0.988644	0.974975	0.961679	0.968417
0.801244	0.788074	0.774673	0.790809	0.807632	0.792933	0.802723	0.780913	0.795221	0.787565	0.727257	0.845738	0.790982	0.75224	0.805111	0.797339	0.830631	0.745794	0.764419	0.737329	0.7278	0.733846	0.77619	0.737725	0.702893	0.755076	0.705474	0.789371	0.739464	0.682212	0.75732	0.81651	0.771537	0.769235	0.751994	0.800952	0.718792	0.788716	0.77362	0.730507	0.750647	0.757793	0.811082	0.769855	0.785587	0.761985	0.7178	0.78281	0.757137	0.750842
2.83328	2.75184	2.98918	2.90083	2.72968	2.67031	2.58797	2.63033	2.50529	2.49047	2.46308	2.30542	2.27301	2.33602	2.26578	2.2223	2.18044	2.05891	2.09969	2.03649	2.12491	2.06804	2.06973	2.33722	2.07139	2.21788	2.12845	2.07825	1.7814	2.10782	1.73097	1.83966	1.8322	2.15296	1.96951	1.96493	1.87309	1.78946	1.81595	1.84323	2.00974	2.10795	2.04122	2.11421	2.01248	2.01921	1.997	1.66351	1.91474	1.90639
0.578568	0.586199	0.578964	0.583652	0.569505	0.583221	0.578875	0.566191	0.569525	0.571699	0.561884	0.584272	0.588404	0.568267	0.561286	0.564169	0.564976	0.572965	0.597832	0.603461	0.572899	0.568574	0.575344	0.57552	0.591919	0.588112	0.583189	0.597291	0.568125	0.594877	0.571573	0.565409	0.614168	0.602026	0.590355	0.591181	0.594107	0.571463	0.585651	0.57418	0.559911	0.561114	0.553067	0.562367	0.562869	0.563729	0.557394	0.573983	0.53889	0.549004
0.779947	0.813995	0.813457	0.813933	0.791434	0.791874	0.795124	0.776729	0.78661	0.796747	0.79255	0.789804	0.787076	0.770182	0.780379	0.781345	0.782314	0.76579	0.763573	0.74886	0.755605	0.767868	0.735089	0.739562	0.733926	0.743973	0.77495	0.739687	0.748404	0.757329	0.74563	0.747646	0.754095	0.746443	0.767982	0.769957	0.762338	0.758659	0.755016	0.751938	0.748885	0.745857	0.742566	0.739304	0.736071	0.732866	0.729689	0.726539	0.725502	0.724467
0.934754	0.919909	0.918794	0.918961	0.914684	0.93622	0.931053	0.909653	0.864809	0.877714	0.89983	0.932674	0.86963	0.865861	0.898399	0.899625	0.907196	0.907137	0.85982	0.872465	0.870005	0.829147	0.806037	0.78418	0.761992	0.784733	0.770435	0.760448	0.749671	0.75946	0.780927	0.820476	0.810509	0.791358	0.794639	0.785555	0.792749	0.780141	0.767927	0.772622	0.768583	0.758869	0.751797	0.755067	0.755547	0.744867	0.747556	0.772659	0.725894	0.734051
0.880518	0.986451	1.13292	1.01894	0.925793	0.848251	1.04906	1.1328	1.05197	0.908263	0.799097	0.897318	1.02307	1.05873	1.06912	1.0877	1.02031	0.960788	0.907827	0.8604	0.817682	0.779005	0.739548	0.79641	0.832135	0.906717	0.94678	1.02618	1.12011	0.90094	0.980623	0.981984	0.999955	0.934284	1.14874	0.944287	0.942563	0.918096	0.96911	1.02613	1.22435	1.3223	1.2181	1.1559	1.09973	1.04878	1.00233	1.20158	1.16012	1.12143
0.856745	0.902444	0.920114	0.909259	0.878594	0.938781	0.907901	0.889641	0.916546	0.940768	0.915385	0.88249	0.910815	0.928203	0.919604	0.916833	0.90901	0.868704	0.912838	0.835337	0.890788	0.862765	0.836643	0.81864	0.825566	0.822029	0.799192	0.811404	0.803633	0.79278	0.778619	0.822852	0.838426	0.77418	0.766312	0.782107	0.784052	0.800533	0.78251	0.786199	0.819384	0.790999	0.834428	0.811456	0.784009	0.793096	0.802396	0.811917	0.791946	0.829778
2.41764	1.78839	2.116	2.06185	2.01041	2.13575	2.03865	2.0268	1.86661	1.90993	1.85257	1.95757	1.96427	1.60893	1.8523	1.79026	1.82909	1.54074	1.65948	1.72588	1.85868	1.88616	1.93713	1.78763	1.88341	1.99004	2.01888	1.98728	2.51435	2.16605	2.31608	2.4374	2.41817	2.34196	2.3619	1.99611	2.1464	1.9812	1.80237	1.84836	1.64421	1.48067	1.31775	1.64965	1.36698	1.29479	1.24825	0.990903	0.978901	1.13095
0.752432	0.774649	0.758495	0.756202	0.750109	0.74369	0.753571	0.756402	0.748353	0.727359	0.729771	0.728362	0.716369	0.703145	0.721033	0.713655	0.690129	0.692293	0.68171	0.676271	0.684315	0.667758	0.659986	0.661574	0.64944	0.652973	0.63819	0.650414	0.635897	0.641636	0.633697	0.644041	0.613087	0.62214	0.620465	0.612661	0.611036	0.612519	0.615039	0.598362	0.598336	0.60809	0.585485	0.599793	0.596232	0.610721	0.610392	0.601498	0.615367	0.606713
0.773757	0.795061	0.768386	0.762455	0.775709	0.78716	0.786866	0.781581	0.740054	0.756615	0.785527	0.780287	0.81817	0.844486	0.842004	0.846403	0.846341	0.833042	0.859336	0.816383	0.839342	0.819834	0.77902	0.806005	0.827484	0.816898	0.796998	0.798352	0.809673	0.798355	0.814298	0.777381	0.8071	0.757832	0.778693	0.786796	0.795069	0.794468	0.793867	0.799292	0.800646	0.798786	0.810225	0.807837	0.769975	0.771937	0.756862	0.788144	0.758006	0.814414
1.05717	1.033	1.04929	1.0757	1.06298	1.05705	1.08405	1.08037	1.06544	1.08335	1.06745	1.0605	1.05363	1.0825	1.05642	1.0671	1.05406	1.06143	1.04016	1.03777	1.04075	1.05713	1.04522	1.04367	1.04037	1.03119	1.02684	1.03122	1.0252	1.01272	1.00705	1.01622	1.01676	1.04833	1.01537	1.02454	1.00628	0.989121	1.00913	0.961828	0.986496	1.00162	1.00305	0.970476	1.01084	1.01045	1.00639	1.00237	1.01098	1.0317
0.934486	0.903063	0.888162	0.913125	0.896865	0.913035	0.9298	0.913919	0.885387	0.893763	0.902299	0.902559	0.845261	0.794803	0.877667	0.924238	0.898172	0.924618	0.95267	0.978674	1.00614	0.993767	1.01401	0.933799	0.970414	1.01002	0.906784	1.01664	1.03986	1.02878	0.916189	0.902739	0.937798	0.926488	0.991804	0.984606	0.960007	0.963677	0.971729	0.963539	0.98159	0.954973	0.957415	0.914032	0.95013	0.895262	0.883341	0.888972	0.903139	0.924421
1.10304	1.18014	1.1237	1.04271	0.986611	1.01562	1.13347	1.07811	1.05218	1.08873	1.12448	1.1286	1.1483	1.14604	1.1658	1.16051	1.11825	1.3164	1.16842	1.19684	1.3542	1.2172	1.29757	1.36943	1.29128	1.34294	1.27708	1.26125	1.22627	1.26442	1.23548	1.26439	1.26455	1.2593	1.19743	1.23031	1.21644	1.19376	1.25011	1.19775	1.26028	1.33413	1.36969	1.23908	1.21278	1.33567	1.28451	1.31429	1.22654	1.26089
0.812009	0.935354	0.805929	0.789007	0.822404	0.773865	0.797687	0.770543	0.943678	0.791987	0.753674	0.751948	0.752217	0.728629	0.767549	0.714634	0.737905	0.755156	0.760172	0.731263	0.786095	0.782732	0.812909	0.798796	0.906011	0.792885	0.820053	0.752204	0.792965	0.753551	0.775188	0.791959	0.808393	0.790928	0.785872	0.799781	0.814191	0.747405	0.778435	0.877048	0.796091	0.858624	0.849067	0.774788	0.929885	0.759335	0.797267	0.928086	1.03979	0.867932
0.804729	0.785538	0.808114	0.799906	0.793393	0.806646	0.780921	0.77996	0.78358	0.775233	0.766594	0.778381	0.761666	0.757232	0.753509	0.766574	0.748049	0.747215	0.728898	0.712293	0.699296	0.711557	0.717697	0.698017	0.693365	0.688326	0.68722	0.674748	0.684172	0.650285	0.652511	0.655925	0.663073	0.684357	0.657321	0.66237	0.670893	0.66212	0.667883	0.662695	0.671106	0.682693	0.691226	0.695246	0.690127	0.67227	0.662703	0.639281	0.665815	0.650627
0.728794	0.742603	0.72199	0.748113	0.734179	0.712121	0.724319	0.746229	0.741963	0.701968	0.721426	0.730968	0.749649	0.748309	0.710152	0.718004	0.70567	0.703063	0.755518	0.735566	0.780301	0.725165	0.741898	0.715831	0.713051	0.722623	0.704965	0.732391	0.768419	0.736419	0.734531	0.762674	0.734162	0.77684	0.830368	0.891819	0.744398	0.770864	0.771884	0.758582	0.758539	0.759671	0.752758	0.724699	0.723649	0.741386	0.730024	0.736785	0.72721	0.701337
0.757179	0.757103	0.730679	0.765813	0.754751	0.755002	0.756802	0.772269	0.776295	0.780365	0.797974	0.779402	0.73944	0.800146	0.763382	0.765503	0.786806	0.735301	0.790642	0.748195	0.739764	0.731522	0.675153	0.740461	0.662668	0.682145	0.73225	0.781934	0.736211	0.832876	0.779491	0.811905	0.827709	0.808431	0.795048	0.763971	0.818128	0.844849	0.830209	0.844448	0.856576	0.854413	0.874294	0.87313	0.812256	0.815275	0.818317	0.836522	0.844017	0.815433
0.974584	0.968906	0.979976	1.00419	0.989978	0.995771	0.983336	0.989786	0.978971	0.971021	0.993736	0.983714	0.997772	1.00217	0.990916	1.00195	1.01479	1.02797	1.04521	1.03792	1.04548	1.05314	0.880308	0.84812	0.819466	0.888261	0.824172	0.870722	0.834412	0.861867	0.90592	0.892668	0.948068	0.852185	0.854379	0.917105	0.87733	0.899546	0.897599	0.859493	0.845516	0.830879	0.894384	0.897468	0.850311	0.907264	0.819631	0.81675	0.798781	0.792785
0.6016	0.566848	0.525322	0.573829	0.595837	0.554808	0.532993	0.589239	0.547589	0.555054	0.562727	0.570614	0.578725	0.587071	0.59566	0.604505	0.613616	0.623006	0.632688	0.642676	0.652984	0.663628	0.674625	0.685993	0.69775	0.709917	0.722516	0.73557	0.749105	0.763147	0.777726	0.792873	0.808621	0.825007	0.839494	0.854499	0.87005	0.876817	0.899335	0.848544	0.803184	0.762428	0.725608	0.69218	0.663352	0.636828	0.670233	0.631873	0.689505	0.673077
0.629089	0.616045	0.613591	0.637333	0.615804	0.609784	0.60802	0.62961	0.62842	0.610068	0.598378	0.613521	0.603091	0.612677	0.612571	0.592711	0.635843	0.629056	0.594154	0.59527	0.590596	0.59703	0.639954	0.628599	0.616235	0.611264	0.635224	0.631308	0.659075	0.616667	0.629583	0.663804	0.769891	0.731992	0.751872	0.780332	0.803962	0.776033	0.76218	0.766343	0.761021	0.764442	0.718237	0.766416	0.78666	0.782061	0.789012	0.705986	0.752606	0.736244
0.777717	0.792082	0.796361	0.801947	0.807612	0.759109	0.786997	0.799473	0.805167	0.825507	0.82371	0.80647	0.802434	0.806396	0.822115	0.803528	0.776718	0.800229	0.784216	0.779851	0.77683	0.797758	0.722914	0.778198	0.761511	0.815868	0.783221	0.770594	0.782865	0.795234	0.73046	0.767473	0.799627	0.846391	0.856618	0.749574	0.819237	0.76583	0.740065	0.719612	0.705511	0.715086	0.754634	0.736301	0.751472	0.837062	0.789711	0.729861	0.71801	0.732143
1.17731	1.10507	1.11926	1.10965	1.0872	1.08201	1.07766	1.09313	1.07585	1.0793	1.09382	1.03191	1.08264	1.09221	1.08848	1.07153	1.06888	1.05507	1.03427	1.0336	1.0386	1.02894	1.03254	1.03577	1.0403	1.0349	1.04582	1.03745	1.0262	1.02426	1.01548	1.03439	1.02431	1.03814	0.950619	1.0381	1.00611	1.00882	1.01924	1.02479	1.01744	1.00891	1.01425	1.00504	1.0019	0.997574	1.00953	1.01148	0.985318	0.9545
0.592398	0.598324	0.615796	0.6036	0.631	0.599196	0.597395	0.611672	0.590408	0.592537	0.616128	0.621283	0.630918	0.57784	0.610643	0.644229	0.604836	0.609771	0.617846	0.600412	0.607967	0.613994	0.600063	0.592839	0.591002	0.585348	0.600822	0.61125	0.600166	0.604775	0.599205	0.593037	0.628141	0.614423	0.62031	0.644866	0.627804	0.620291	0.648989	0.640745	0.634426	0.620208	0.63375	0.619113	0.605137	0.59355	0.603242	0.604594	0.598199	0.596647
0.750796	0.742041	0.760523	0.765496	0.756362	0.7727	0.751371	0.763549	0.77653	0.788964	0.751961	0.783776	0.792125	0.784165	0.782748	0.776205	0.759872	0.800494	0.801048	0.769521	0.740356	0.752247	0.750276	0.76477	0.745767	0.763372	0.784321	0.731314	0.769245	0.763928	0.726357	0.76856	0.790785	0.793502	0.806704	0.753746	0.763898	0.763292	0.758124	0.729737	0.702496	0.703858	0.703122	0.715003	0.697677	0.713671	0.712224	0.715768	0.725421	0.725213
1.15172	1.17268	1.07734	1.04463	1.20303	1.17128	1.19229	1.19884	1.21147	1.17223	1.15256	1.13353	1.16213	1.16782	1.23462	1.09835	1.16986	1.20425	1.15588	1.1591	1.19683	1.15335	1.17602	1.1323	1.13427	1.18808	1.14498	1.14301	1.17688	1.19061	1.14607	1.18895	1.15754	1.22022	1.16179	1.17249	1.18338	1.21886	1.39242	1.11243	1.20094	1.18071	1.18466	1.21752	1.11248	1.11476	1.11704	1.13537	1.18233	1.23333
0.987419	1.00403	0.908569	0.763979	0.943988	0.978375	0.995499	1.00857	1.03447	1.01116	1.06699	0.97579	1.14448	1.25427	1.36917	1.24421	1.19619	1.28053	1.15512	0.957075	1.13212	1.38552	1.2923	1.17926	1.08441	1.42792	1.53444	1.14073	0.907799	0.995191	1.19797	1.21526	1.23032	0.948247	1.14688	1.45078	1.3589	1.1011	1.24631	1.43564	1.44159	1.44759	1.35696	1.3751	1.40224	1.36931	1.37777	1.33492	1.43681	1.50017
																		0.671494	0.670062	0.668635	0.667215	0.6658	0.664392	0.66299	0.661593	0.660202	0.658818	0.667078	0.675548	0.651838	0.678029	0.681615	0.695096	0.686682	0.701677	0.693503	0.698397	0.692386	0.683399	0.706211	0.674506	0.672236	0.669981	0.665941	0.686056	0.655803	0.671237	0.66718	0.672703
	3.0577	3.0215	3.01877	3.01604	3.01331	3.01059	3.29792	3.26872	3.34442	3.32763	3.311	3.29601	3.28115	3.36009	3.34254	3.32517	3.14123	3.2334	3.38739	3.26422	3.30097	3.21342	3.14086	3.23243	3.19572	3.14098	3.30579	3.29631	3.28962	3.19945	3.21639	3.7778	3.58263	3.49859	3.49159	3.48447	3.59536	3.52146	3.45053	3.38241	3.30478	3.05723	3.33238	3.24909	3.48787	3.10163	3.17838	3.1505	3.38215
		0.664892	0.662955	0.661028	0.659113	0.674663	0.660243	0.713068	0.677523	0.729046	0.639778	0.641844	0.707617	0.658579	0.615897	0.639676	0.64168	0.641327	0.640974	0.680434	0.663787	0.647574	0.708847	0.661436	0.682704	0.674593	0.6959	0.664735	0.675929	0.673667	0.731403	0.66678	0.74182	0.669093	0.6025	0.620821	0.640291	0.661022	0.632644	0.699694	0.680391	0.662125	0.627299	0.699417	0.645723	0.64448	0.694851	0.620515	0.631513
		1.18235	1.07641	1.01442	0.938661	1.05652	1.0308	1.13959	1.04695	1.18139	1.23393	1.29136	1.27425	1.25759	1.66155	1.37345	1.39372	1.87404	2.85952	1.92077	1.658	1.50715	1.83095	2.3631	1.51257	2.33741	1.9263	1.63817	1.42502	1.26096	1.26737	1.21878	1.72342	1.30536	1.15185	1.04406	0.954721	0.976104	0.968416	1.17123	1.48151	1.82997	1.82881	2.02738	2.19853	1.85171	2.34796	2.26754	1.86482
								1.53976	1.56894	1.46456	1.77976	1.59716	2.08254	1.84489	1.50372	1.40245	1.78097	2.05821	2.00766	2.23468	1.68002	1.34595	1.92793	1.71965	1.34555	1.52729	1.76581	1.64641	1.75841	1.85233	1.88763	1.95225	2.4143	2.28707	2.13748	2.59295	2.97242	3.46669	3.82676	3.40479	3.16446	3.74669	3.46051	3.63348	3.50586	3.23837	3.79498	3.44117	3.87472
																0.754531	0.731909	0.729227	0.695194	0.742027	0.739819	0.725181	0.749337	0.754293	0.759314	0.711749	0.728614	0.733193	0.737829	0.742525	0.753113	0.764008	0.761608	0.759223	0.756853	0.770012	0.745306	0.781839	0.752981	0.76637	0.760137	0.754004	0.74797	0.742032	0.736187	0.764263	0.775227	0.762805	0.750776
																						1.34959	1.42663	1.46911	1.40482	1.45651	1.4749	1.48468	1.56433	1.47058	1.49704	1.71842	1.66893	1.62092	1.78383	1.80246	1.80403	1.66562	1.62951	1.5903	1.5344	1.49255	1.62607	1.65021	1.39113	1.69863	1.63948	1.60792	1.61899
																									8.18137	7.96556	7.76084	7.56638	7.38143	7.20531	7.09361	6.98533	6.82502	7.05713	7.30559	7.57218	7.85896	8.16832	8.50303	8.86635	9.2621	8.30988	7.53521	7.63817	7.74399	7.85278	7.96467	8.07979	8.1983
																																							3.93926	3.86968	4.11367	3.57217	3.93307	3.59446	3.984	3.90083	3.36746	3.60101	3.68328
0.549738	0.508088	0.525253	0.524294	0.506845	0.521213	0.53642	0.559838	0.582157	0.541309	0.559745	0.580838	0.538043	0.528204	0.518718	0.550364	0.586123	0.574985	0.515702	0.579413	0.520198	0.534512	0.573769	0.553767	0.547445	0.516489	0.530362	0.535601	0.581563	0.550183	0.528139	0.53556	0.560378	0.546003	0.534329	0.518974	0.568754	0.579139	0.564517	0.527252	0.522502	0.549789	0.55927	0.51857	0.538886	0.541442	0.518399	0.554958	0.561039	0.54645
0.860321	0.881782	0.849639	0.84998	0.856292	0.86492	0.859082	0.872498	0.852912	0.875383	0.884093	0.855691	0.860019	0.867838	0.857231	0.863682	0.868355	0.858031	0.841426	0.850751	0.851549	0.859095	0.870714	0.853358	0.847534	0.867033	0.856222	0.863803	0.870919	0.867344	0.861272	0.851664	0.856049	0.842335	0.858378	0.842227	0.844034	0.840794	0.826386	0.83649	0.821729	0.837387	0.843278	0.816782	0.831266	0.840208	0.823336	0.837645	0.84666	0.828846
0.990637	1.04078	1.04179	1.04927	1.01392	1.01517	1.01431	1.0054	0.982493	1.004	1.02687	0.99981	1.00749	1.01262	1.02073	1.01122	0.997269	1.05433	1.02192	1.04736	1.04009	1.00375	0.971949	0.979993	0.967287	0.971845	0.969592	0.97218	0.981226	0.970545	0.975841	0.942277	0.935135	0.942109	0.957459	0.925016	0.951504	0.934217	0.932214	0.920253	0.933639	0.918894	0.933091	0.903596	0.900552	0.919593	0.902983	0.916715	0.885622	0.901799
0.904195	0.919064	0.91499	0.930394	0.924916	0.933631	0.996822	0.933188	0.917067	0.947103	0.942764	0.924948	0.936448	0.940849	0.925434	0.935803	0.934076	0.931331	0.935808	0.893762	0.927503	0.920803	0.939353	0.932779	0.953821	1.01746	0.965871	0.987741	0.936729	0.911558	0.934514	0.929767	0.916816	0.913253	0.922542	0.97527	0.905176	0.893681	0.887632	0.885876	0.881901	0.856907	0.953264	0.945092	0.8891	0.853941	0.852001	0.879211	0.881702	0.939514
0.846455	0.829959	0.95416	0.84822	0.933233	0.890141	0.885794	0.808422	0.891983	0.906764	0.816028	0.937857	0.856996	0.788973	0.913058	0.925548	0.77589	0.898182	0.770976	0.908479	0.900194	0.891619	0.875912	0.867169	0.880963	0.757152	0.70756	0.857198	0.875582	0.843079	0.829705	0.73602	0.848686	0.849217	0.767402	0.788426	0.778216	0.742314	0.871542	0.781067	0.742927	0.748971	0.760535	0.749092	0.874531	0.759097	0.791948	0.843581	0.790548	0.806994
0.728242	0.713922	0.677309	0.730286	0.735988	0.731029	0.729875	0.744189	0.74669	0.735812	0.74887	0.717125	0.751601	0.747114	0.748333	0.750956	0.758624	0.766116	0.768344	0.738068	0.731143	0.763932	0.764395	0.756223	0.743651	0.789676	0.777762	0.749949	0.755971	0.786676	0.778491	0.796004	0.770341	0.775977	0.797571	0.79324	0.762951	0.761754	0.764383	0.756683	0.765993	0.758481	0.743142	0.752721	0.676089	0.745685	0.743514	0.715062	0.709171	0.752274
1.2315	1.2761	1.3267	1.43564	1.26958	1.30939	1.34845	1.22195	1.29971	1.38804	1.48926	1.11245	1.13282	1.15396	1.25132	1.27056	1.29039	1.10203	1.10248	1.10805	1.11369	1.11938	1.20103	1.29552	1.40615	1.53745	1.69579	1.89048	1.90068	1.56228	1.32617	1.15205	1.5246	1.76003	1.66407	1.62665	1.59087	1.36173	1.43826	1.52391	1.35871	1.62233	1.57733	1.33998	1.34472	1.1589	1.23668	1.57854	1.58044	1.4476
1.06443	1.06694	1.07146	1.04986	1.05806	1.03917	1.02095	1.04832	1.07063	1.03561	1.04061	1.04861	1.04373	1.06284	1.02869	1.01123	1.02739	1.0131	1.01606	1.03327	1.0097	1.0112	1.02022	1.00314	1.00579	1.01849	1.00868	1.00025	1.00596	0.994341	0.967196	0.991147	0.984706	0.978208	0.963373	0.986053	0.957455	0.96664	0.963112	0.975812	0.970074	0.966514	0.952856	0.952006	0.944425	0.93796	0.942398	0.96736	0.956639	0.953955
0.899263	0.941586	0.947651	0.852663	0.8589	0.8884	0.881676	0.873905	0.872263	0.89171	0.856014	0.875777	0.860966	0.849597	0.840705	0.865509	0.84805	0.849232	0.849465	0.845358	0.885945	0.88637	0.885181	0.881816	0.886413	0.842877	0.850286	0.847757	0.847832	0.849821	0.849205	0.877519	0.858737	0.82317	0.84757	0.863329	0.832617	0.806301	0.816141	0.814774	0.78133	0.818075	0.780633	0.812923	0.780138	0.811972	0.798711	0.828955	0.794699	0.780824
1.09731	1.09302	1.08919	1.08199	1.08371	1.08004	1.08475	1.10112	1.10593	1.09514	1.09184	1.11727	1.09276	1.0777	1.07894	1.06508	1.09015	1.04184	1.08116	1.10011	1.08943	1.08848	1.09411	1.0969	1.08718	1.06552	1.07834	1.05943	1.06674	1.05731	1.04152	1.081	1.07258	1.09361	1.04943	1.06446	1.11539	1.11632	1.06819	1.11836	1.09375	1.11881	1.14113	1.1168	1.12853	1.09968	1.14664	1.14799	1.07783	1.06392
					0.501474	0.502224	0.502976	0.503731	0.504488	0.505247	0.506009	0.506772	0.507539	0.508307	0.512523	0.516809	0.521168	0.5256	0.530109	0.534696	0.539363	0.539592	0.539821	0.522568	0.506383	0.542462	0.549193	0.556093	0.563168	0.501969	0.514597	0.527876	0.557499	0.582514	0.525488	0.521255	0.533123	0.545435	0.561564	0.576382	0.552468	0.53046	0.547266	0.560418	0.560823	0.525895	0.509637	0.529806	0.551637
0.788746	0.789924	0.78159	0.775112	0.771542	0.77334	0.76285	0.762702	0.756901	0.751304	0.750691	0.745927	0.733451	0.728296	0.732644	0.721345	0.726293	0.718577	0.706514	0.707169	0.707867	0.712584	0.699393	0.702315	0.681299	0.696773	0.690508	0.691654	0.694705	0.68124	0.692763	0.700427	0.690584	0.693652	0.685214	0.695041	0.687237	0.685324	0.685512	0.676766	0.685728	0.687589	0.68318	0.682536	0.674031	0.684051	0.66719	0.671991	0.655828	0.654665
0.565992	0.553299	0.619016	0.616545	0.614094	0.611662	0.60925	0.668441	0.646148	0.65603	0.733928	0.680122	0.7864	0.851787	0.803274	0.691119	0.712705	0.635492	0.739966	0.660432	0.603618	0.726902	0.913472	0.934839	0.891242	0.876709	0.888567	1.1139	0.928852	0.970038	0.987909	0.925866	1.06321	0.931626	0.955298	0.963772	1.06583	1.07866	1.03974	1.15869	1.3013	1.10971	1.26106	1.08454	1.20992	1.13287	1.12906	1.06899	1.00704	1.0028
																		0.964988	0.911047	0.916897	0.923311	0.929814	0.93641	0.98662	0.951066	1.00158	0.966578	0.972873	1.09009	1.03065	1.01354	1.08249	1.11528	1.09714	1.16317	1.16251	1.24078	1.53741	1.12392	1.29782	1.26072	1.41311	1.3525	1.38212	1.24753	1.13683	1.26584	1.29215	1.21613
2.18715	2.54394	2.68366	2.83962	3.01484	1.76955	1.69961	2.56529	1.85272	1.78611	1.58459	1.41209	1.64263	1.43099	1.97416	1.55605	1.41558	1.19354	1.57019	1.45088	1.28795	1.15792	1.05174	0.963392	0.88874	0.824825	0.888377	0.836212	0.876915	1.24688	2.15682	1.81441	1.12452	0.81474	0.851448	0.852596	0.853747	0.854901	0.856059	0.857219	0.858383	0.964087	0.829795	0.826764	0.996158	1.02902	1.06412	1.10169	1.02814	0.963788
0.661174	0.634363	0.646803	0.653619	0.621284	0.632473	0.629111	0.650706	0.650748	0.65129	0.65035	0.620201	0.646671	0.651335	0.64063	0.657579	0.644588	0.640356	0.652194	0.665598	0.639935	0.674051	0.649342	0.637022	0.680693	0.650122	0.65153	0.628033	0.620121	0.63375	0.63831	0.660985	0.663172	0.666383	0.666571	0.651258	0.632769	0.645743	0.662224	0.638394	0.622006	0.637214	0.623503	0.6311	0.623076	0.625975	0.618626	0.631713	0.610919	0.612321
0.894952	0.942118	0.900764	0.887892	0.881902	0.907115	0.913403	0.882876	0.915212	0.949347	0.941526	0.908034	0.91332	0.956106	0.934293	0.937527	0.915104	0.946841	0.941592	0.924315	0.925911	0.947499	0.89965	0.881494	0.908747	0.869348	0.895328	0.888056	0.899523	0.903104	0.881932	0.942864	0.900711	0.936905	0.918768	0.90132	0.89152	0.943919	0.920869	0.874884	0.883897	0.8915	0.925784	0.870117	0.873696	0.883712	0.884575	0.87241	0.888267	0.857649
0.823998	0.801031	0.815466	0.753853	0.759944	0.750282	0.74474	0.73156	0.784101	0.739173	0.74693	0.799324	0.822605	0.8026	0.743954	0.722311	0.816813	0.794872	0.800991	0.829587	0.815282	0.819011	0.824062	0.785738	0.787462	0.800091	0.761671	0.76436	0.76573	0.768256	0.750919	0.733565	0.744788	0.738798	0.75394	0.725158	0.704811	0.692324	0.680103	0.679174	0.674939	0.66497	0.652856	0.649389	0.643509	0.643232	0.653676	0.651454	0.651339	0.668398
0.962416	0.970894	0.960201	0.95653	0.937657	0.948697	0.960611	0.979841	0.981186	0.954039	0.948028	0.953165	0.972779	0.960556	0.948636	0.991913	0.994522	0.980817	0.99006	0.997163	0.988127	0.973678	0.993521	0.986203	1.02039	1.02248	1.02761	1.02533	1.03813	1.04019	1.05409	0.931293	1.01675	1.00562	0.984518	1.0263	1.02103	1.01649	1.02777	1.03635	0.987208	1.0139	0.979835	1.01777	0.983088	0.975668	1.06889	0.982465	1.00918	1.08258
0.67791	0.650069	0.640836	0.657227	0.671339	0.629462	0.649097	0.627277	0.63298	0.621172	0.62398	0.59076	0.577589	0.581186	0.590711	0.558932	0.540362	0.57727	0.549972	0.567008	0.554309	0.565511	0.585939	0.559913	0.583849	0.580951	0.579394	0.569067	0.570111	0.584756	0.588746	0.597574	0.593933	0.610921	0.591589	0.584893	0.579865	0.612236	0.594677	0.594219	0.588744	0.57162	0.618708	0.595248	0.601135	0.597662	0.626922	0.620972	0.640341	0.64323
0.945735	0.896305	0.904476	0.918811	0.913232	0.914287	0.912408	0.901101	0.833754	0.877447	0.877566	0.873663	0.86971	0.846447	0.871822	0.923838	0.878042	0.951353	0.968143	0.971477	0.980122	0.980523	1.01917	0.981521	0.937518	0.961912	0.919956	0.885829	0.901457	0.856057	0.866595	0.909179	0.893679	0.813992	0.847081	0.81951	0.82298	0.838713	0.822298	0.810143	0.762842	0.70615	0.736628	0.763181	0.724562	0.689663	0.655893	0.649894	0.65821	0.70465
0.982666	0.997863	0.96999	1.1009	0.967133	0.97406	0.975966	1.00085	0.97568	0.969725	0.99281	0.963355	0.923327	0.909686	0.935443	0.923157	0.944361	0.949744	0.969577	0.941484	0.956233	0.95137	0.940679	0.9424	0.986799	0.944336	1.02172	0.994908	1.00877	0.937724	0.982667	0.951744	0.983423	0.901216	0.926072	0.975606	0.955138	0.99003	0.99369	0.970016	0.947106	0.912324	0.919137	0.918651	0.86986	0.953688	0.917311	0.861139	0.869823	0.878684
0.725356	0.685261	0.692961	0.706709	0.673296	0.680557	0.696366	0.685961	0.669313	0.677658	0.678857	0.665251	0.661799	0.650943	0.661289	0.637344	0.617312	0.642123	0.636442	0.634587	0.627079	0.632064	0.632154	0.63748	0.61187	0.60013	0.609872	0.61192	0.615319	0.623731	0.621054	0.6282	0.643423	0.639815	0.635933	0.650956	0.623357	0.631866	0.619745	0.622507	0.621256	0.610373	0.606386	0.629872	0.60562	0.611759	0.624153	0.609103	0.618095	0.627425
2.42642	2.41236	1.9188	1.85187	1.90207	1.95844	1.89077	1.85862	1.92984	1.95733	1.9602	1.94562	2.02241	1.94916	1.92956	1.86145	2.22343	2.05388	2.24754	2.22324	2.25023	2.68906	2.43829	2.5494	2.28593	2.47469	2.63257	2.63646	2.19098	2.37021	2.30573	2.61418	2.2901	2.38717	2.42761	2.40734	2.31991	2.44283	2.45145	2.41306	2.91037	2.36139	2.26757	2.2364	2.24271	2.18834	2.21396	2.29364	2.20869	2.16412
0.586959	0.588008	0.602279	0.60489	0.588572	0.578895	0.56431	0.564297	0.596922	0.577402	0.599974	0.569324	0.559591	0.579122	0.567204	0.589677	0.614659	0.593587	0.605663	0.603541	0.611838	0.587197	0.603399	0.617373	0.60867	0.604579	0.599813	0.605317	0.630453	0.575151	0.577278	0.598045	0.617273	0.613792	0.612332	0.602988	0.54459	0.573993	0.595481	0.595358	0.573012	0.589771	0.601992	0.584318	0.625559	0.589181	0.587205	0.598968	0.580476	0.597947
0.937656	0.95736	0.937415	0.885965	0.920154	0.894919	0.94381	0.923738	0.933782	0.925352	0.897373	0.874736	0.872703	0.855405	0.862528	0.850968	0.853221	0.836816	0.837478	0.843638	0.821898	0.832148	0.84347	0.854919	0.824512	0.826225	0.868162	0.844056	0.855805	0.883136	0.878006	0.865449	0.852049	0.867574	0.917248	0.908679	0.913065	0.896054	0.905274	0.920184	0.916598	0.917668	0.932359	0.90138	0.889797	0.940642	0.888969	0.957796	0.913959	0.935316
0.708963	0.706774	0.706227	0.707645	0.695341	0.676594	0.684278	0.66274	0.655978	0.660551	0.669777	0.674177	0.682369	0.673048	0.68719	0.701736	0.722073	0.710612	0.717236	0.712764	0.718075	0.738044	0.750237	0.75295	0.736245	0.743361	0.742136	0.759762	0.74206	0.745985	0.718622	0.757856	0.75016	0.736615	0.745732	0.711793	0.738709	0.739002	0.744798	0.725436	0.744666	0.708199	0.715302	0.714738	0.715903	0.70148	0.703875	0.704048	0.707385	0.711246
2.07109	1.95189	2.18018	2.12998	2.13057	2.26792	2.34137	2.19951	2.30633	2.19794	2.27595	2.26438	2.17472	2.12664	2.09459	2.12447	2.15837	2.1988	2.16401	2.15046	2.1717	2.24158	2.14925	2.06701	2.07785	2.09134	2.12633	2.1278	1.97212	2.30897	1.95346	1.96396	2.08437	1.98236	1.77836	1.89225	1.91123	1.88938	2.19351	1.84833	2.23291	2.30554	2.17707	2.38388	2.16274	2.12921	1.94757	2.16302	2.21582	2.01931
0.580961	0.557043	0.582751	0.610948	0.593215	0.622244	0.641312	0.624222	0.711993	0.646498	0.679921	0.647565	0.661845	0.702116	0.665061	0.68205	0.677913	0.619044	0.622205	0.607017	0.632098	0.624447	0.678971	0.663416	0.619169	0.583969	0.632201	0.578095	0.629859	0.657153	0.700673	0.67107	0.653425	0.644277	0.633971	0.629288	0.551761	0.57639	0.60332	0.575136	0.595134	0.576161	0.626131	0.611927	0.60948	0.590928	0.605735	0.618336	0.584845	0.608481
0.863855	0.844449	0.845363	0.837089	0.841635	0.836405	0.827764	0.8431	0.824915	0.845946	0.829775	0.837951	0.834679	0.849505	0.842455	0.83973	0.845625	0.823248	0.815106	0.832176	0.861465	0.838797	0.862072	0.835198	0.836919	0.813105	0.841363	0.837345	0.820223	0.819645	0.849113	0.817562	0.843168	0.855277	0.855617	0.85773	0.866985	0.864228	0.855447	0.847938	0.837385	0.858326	0.853208	0.836526	0.853702	0.837102	0.825749	0.821261	0.838969	0.806534
0.524352	0.539108	0.554718	0.586507	0.622161	0.662431	0.603899	0.592634	0.581668	0.588562	0.597096	0.584264	0.638436	0.602551	0.661443	0.647684	0.634485	0.619531	0.642585	0.637596	0.611989	0.583598	0.593837	0.598064	0.603458	0.618504	0.583679	0.651451	0.61284	0.637911	0.60204	0.63326	0.621782	0.644755	0.648787	0.606786	0.638042	0.633108	0.622864	0.675383	0.679131	0.674621	0.598342	0.600929	0.605297	0.609011	0.612296	0.65283	0.571247	0.639093
0.918711	0.905563	0.89896	0.885351	0.901473	0.871097	0.872723	0.844505	0.864852	0.872715	0.859511	0.882992	0.864919	0.875249	0.846504	0.858818	0.868143	0.875793	0.867589	0.83103	0.806543	0.812598	0.800842	0.776722	0.761387	0.768187	0.797316	0.76735	0.76801	0.752988	0.731202	0.75672	0.741488	0.746904	0.74923	0.759722	0.767243	0.770716	0.752705	0.751465	0.773674	0.773283	0.795294	0.781304	0.769128	0.761886	0.747697	0.763429	0.753742	0.753632
0.886923	0.907294	0.821962	0.844761	0.896774	0.85046	0.781517	0.855675	0.776401	0.779463	0.793765	0.725875	0.765555	0.734555	0.763293	0.703645	0.659437	0.666086	0.719104	0.687763	0.661645	0.704607	0.639769	0.718977	0.68551	0.652192	0.644326	0.730586	0.723857	0.708669	0.70627	0.614254	0.718958	0.68671	0.790747	0.745795	0.719557	0.746539	0.703344	0.691672	0.716831	0.715377	0.71407	0.742146	0.742559	0.738161	0.726378	0.747683	0.735952	0.738111
1.19622	1.17089	1.18839	1.20028	1.18017	1.22067	1.19333	1.20471	1.18568	1.20645	1.18588	1.19638	1.19261	1.17748	1.19891	1.16027	1.18391	1.18412	1.16763	1.17621	1.18336	1.18431	1.19161	1.18197	1.19751	1.21835	1.21913	1.19583	1.18923	1.1949	1.19235	1.18813	1.2176	1.23548	1.23924	1.2319	1.22574	1.19523	1.18901	1.20149	1.1541	1.11149	1.17613	1.14108	1.18808	1.17789	1.1271	1.12456	1.16991	1.12312
1.07066	1.04181	1.03103	1.075	1.06593	1.05056	0.989951	1.02786	1.02497	1.0221	1.03139	1.03076	1.03012	1.022	1.014	0.985963	0.983902	0.981849	0.979805	1.0301	1.08583	1.0028	0.985766	0.966372	1.04069	0.961812	0.990113	1.03981	1.00515	0.974354	0.944196	1.00682	0.950605	0.975152	0.954773	1.02491	1.01333	1.01226	1.04581	0.966484	0.9708	0.987176	1.00411	0.920053	0.987474	1.00466	0.90862	0.889546	0.902516	0.941955
0.85575	0.874008	1.0142	0.910288	0.960864	0.93733	0.849515	0.879536	0.855736	0.840565	0.84196	0.856786	0.851871	0.844161	0.846529	0.851252	0.852074	0.854388	0.859725	0.857394	0.868025	0.83589	0.850723	0.856995	0.843525	0.789064	0.819365	0.804754	0.787629	0.809809	0.833274	0.824982	0.832311	0.838664	0.830068	0.822344	0.837206	0.864161	0.836476	0.807868	0.862083	0.827929	0.80373	0.84514	0.796388	0.813033	0.801292	0.780374	0.762716	0.77963
0.742411	0.722514	0.7435	0.739105	0.741369	0.714286	0.720952	0.697898	0.704015	0.735799	0.770588	0.687733	0.703504	0.695448	0.694287	0.701592	0.709442	0.680178	0.665959	0.714645	0.714474	0.697789	0.681866	0.687129	0.702709	0.719012	0.723847	0.728748	0.733716	0.742191	0.720243	0.699555	0.707504	0.690088	0.718998	0.716501	0.747055	0.742559	0.759215	0.726236	0.758923	0.760857	0.73431	0.758331	0.737185	0.720536	0.720951	0.726469	0.689576	0.729527
	1.87964	1.90914	1.82727	1.75214	1.68294	1.61899	1.73959	1.85951	1.86695	1.69973	1.70219	1.63902	1.59082	1.61325	1.60129	1.58951	1.68486	1.75943	1.55935	1.76747	1.71754	1.6575	1.85771	1.82572	1.78662	1.82568	1.79342	1.82514	1.84937	1.78644	1.87776	1.83428	1.91968	1.88138	1.72154	1.74535	1.70881	1.84893	1.79514	1.58926	1.8183	1.57262	1.81747	1.71047	1.88139	1.85186	1.99119	1.9792	2.01006
1.1743	1.18707	1.11355	1.1984	1.10406	1.09578	1.08762	1.09271	1.15052	1.01918	1.05326	1.01069	1.09582	1.0646	1.10805	1.03406	1.04514	1.04524	1.06914	1.06212	1.02654	1.00551	1.08115	1.1193	1.09874	1.06503	1.10628	1.06777	1.03039	1.02279	1.02794	1.0538	1.05447	1.00683	1.00952	1.01992	0.973392	1.00533	0.99764	1.00341	0.954541	0.961407	0.93522	0.942962	0.917344	0.933069	0.931417	0.915647	0.937743	0.948332
1.2518	1.24387	1.20591	1.2032	1.20851	1.13889	1.10884	1.22567	1.16144	1.13753	1.1008	0.97838	1.06202	1.05651	1.07876	1.10957	1.06481	1.07807	1.12463	1.08982	1.07225	1.04552	0.98173	0.989915	1.02414	1.02486	0.881044	0.971952	0.965395	0.984276	1.01774	0.99644	1.02501	0.995039	1.05627	0.99832	0.962458	0.988621	1.01625	1.01724	1.01824	0.989961	0.994711	0.993841	1.00766	0.995525	1.00705	1.01884	0.985101	1.00286
1.28712	1.36838	1.46059	1.47144	1.33643	1.23185	1.22841	1.42498	1.27595	1.20894	1.19675	1.18035	1.27177	1.29304	1.62499	1.64872	1.59346	1.55594	1.61541	1.55277	1.63722	1.65453	1.57305	1.68982	1.73359	1.55598	1.58445	1.67477	1.6807	1.66928	1.72809	1.62162	1.75979	1.75659	1.59277	1.62336	1.75498	1.69781	1.67134	1.53513	1.66245	1.60583	1.59503	1.63067	1.52591	1.54032	1.56585	1.46165	1.49133	1.46615
2.12204	2.07674	2.03881	1.85263	2.11876	1.99627	2.24908	2.08044	1.96608	2.08747	2.09764	2.08073	2.11296	2.16521	2.13034	2.16216	2.2228	2.03788	2.10237	2.26244	2.05649	2.17518	1.98942	1.94261	2.04873	2.1155	2.28259	2.13965	2.01357	2.03639	1.82843	1.997	1.88789	1.75932	1.64714	1.67928	1.77075	1.72929	1.68971	1.87609	1.67516	1.77142	1.74474	1.88551	1.71629	1.95452	1.77831	1.99238	1.9943	2.16715
1.34174	1.35307	1.28984	1.37395	1.40472	1.44492	1.40435	1.4274	1.43508	1.36952	1.37874	1.33632	1.39406	1.35795	1.31106	1.3357	1.30449	1.29407	1.28382	1.30891	1.35168	1.32789	1.29275	1.30061	1.29415	1.3451	1.40022	1.4264	1.44917	1.44647	1.44379	1.44111	1.45736	1.48155	1.45981	1.46351	1.40476	1.48098	1.48993	1.49732	1.48503	1.49019	1.47789	1.43441	1.4712	1.44671	1.43323	1.41951	1.38594	1.4091
0.901842	0.920059	0.906633	0.897177	0.898075	0.900035	0.917871	1.1058	1.10471	1.10363	1.10254	1.10146	1.10038	1.0993	1.08059	1.06857	1.03828	1.00965	0.982563	1.02004	1.01384	1.00773	0.978749	1.01068	0.990495	1.00128	1.00756	0.991973	0.988696	0.985441	0.982207	0.96966	0.983011	0.993293	0.969425	0.98043	0.968592	0.968928	0.995006	0.965095	0.969674	0.951686	0.960725	0.95726	0.955204	0.941132	0.939288	0.934414	0.922399	0.951156
1.50916	1.49421	1.47955	1.46518	1.50923	1.47007	1.4329	1.48916	1.48381	1.47302	1.43515	1.44171	1.47069	1.47874	1.48546	1.44916	1.44144	1.46134	1.43259	1.42966	1.42162	1.38492	1.40115	1.37209	1.43723	1.42903	1.42094	1.41642	1.41461	1.41585	1.41112	1.3916	1.46322	1.4556	1.40353	1.45679	1.45576	1.4277	1.45821	1.44078	1.4093	1.39936	1.44979	1.39558	1.36745	1.35089	1.35983	1.37926	1.33089	1.33835
1.2811	1.24372	1.21662	1.2784	1.32239	1.3306	1.44741	1.20413	1.19391	1.40579	1.22587	1.24916	1.44265	1.34345	1.25676	1.6287	2.31333	1.59404	1.16891	1.46231	2.18599	1.75076	1.46005	1.22702	1.16023	1.26669	1.21629	1.16974	1.12663	1.18371	1.16849	1.21298	1.61	1.62412	1.63848	1.52002	1.41754	1.47492	1.51793	1.56351	1.51852	1.47605	1.43589	1.39786	1.48117	1.57504	1.33774	1.16258	1.32193	1.41645
2.40211	2.41552	2.42907	2.44278	2.45665	2.47067	2.48485	2.4992	2.44263	2.38856	2.33684	2.0833	1.8794	2.27265	2.39896	2.65594	2.48348	2.43894	2.5163	2.56906	2.62408	2.55121	2.53427	2.49297	2.55518	2.6719	2.51687	2.42547	2.86097	2.3301	1.92154	2.20669	2.14575	2.13566	1.81044	1.96466	1.97545	1.68348	1.8162	1.66476	1.89457	2.16226	1.87716	1.65848	1.58753	1.5224	1.4624	1.61961	1.8147	1.72406
0.896052	0.916727	0.881209	0.906076	0.921846	0.925017	0.901487	0.887769	0.880604	0.872387	0.876996	0.8876	0.872	0.866102	0.843256	0.85466	0.844144	0.847013	0.871966	0.824309	0.83973	0.856309	0.858144	0.859986	0.852366	0.865939	0.888129	0.877259	0.87625	0.88919	0.846429	0.910722	0.914357	0.89664	0.908236	0.920137	0.933715	0.898191	0.933362	0.8752	0.900087	0.933879	0.861175	0.885569	0.894518	0.87974	0.865441	0.837188	0.854404	0.872343
0.722631	0.691732	0.713924	0.708814	0.69033	0.687826	0.696672	0.685017	0.683684	0.669496	0.691136	0.687313	0.659099	0.669563	0.67364	0.668695	0.672371	0.68335	0.684476	0.668774	0.678602	0.685944	0.666953	0.678533	0.685586	0.692476	0.689935	0.703883	0.715991	0.692163	0.691613	0.686524	0.689132	0.708044	0.684245	0.711266	0.727887	0.741415	0.724047	0.72419	0.725401	0.729552	0.730675	0.731536	0.760033	0.745113	0.744035	0.759194	0.750676	0.752816
0.695682	0.691938	0.688234	0.684569	0.690533	0.669255	0.676174	0.683238	0.663667	0.645185	0.738307	0.720035	0.702646	0.679654	0.699943	0.722764	0.694783	0.668888	0.644854	0.730806	0.843196	0.996435	1.21774	1.02858	0.89029	0.784776	0.701622	0.81914	0.808153	0.797456	0.78704	0.776891	0.826431	0.824649	0.822875	0.781468	0.804734	0.829427	0.855685	0.928499	1.01486	1.11893	1.24678	0.989552	0.82031	0.837775	0.856	0.793325	0.80838	0.824016
0.730255	0.728228	0.703076	0.722368	0.72544	0.731811	0.726768	0.715552	0.741567	0.724882	0.733393	0.745491	0.737778	0.729805	0.74454	0.731016	0.708121	0.736936	0.751237	0.744932	0.738072	0.766893	0.74575	0.720161	0.724361	0.725647	0.726938	0.762665	0.802086	0.745194	0.714013	0.708435	0.719867	0.732922	0.726645	0.7362	0.746009	0.732708	0.768973	0.767613	0.768705	0.769287	0.777288	0.732913	0.730699	0.775308	0.77823	0.784422	0.778419	0.768605
																													1.23321	1.20868	1.18511	1.16244	1.14062	1.15823	1.1764	1.19515	1.21451	1.24009	1.26678	1.20482	1.07834	1.09621	1.06419	1.034	1.06827	1.04082	1.05662	1.0729	1.07272
0.736627	0.746141	0.719973	0.71937	0.772928	0.767376	0.727097	0.749709	0.752858	0.733647	0.733276	0.714912	0.697303	0.710768	0.699829	0.690852	0.672341	0.660403	0.651663	0.681521	0.690467	0.699652	0.679989	0.651101	0.655578	0.662713	0.645312	0.647918	0.664038	0.63909	0.648934	0.644941	0.644659	0.638957	0.632503	0.661106	0.650606	0.648067	0.658876	0.757743	0.66097	0.646206	0.6514	0.651073	0.609059	0.631058	0.616756	0.633374	0.667099	0.630784
0.797674	0.762001	0.777106	0.799161	0.79689	0.781569	0.781113	0.763942	0.74998	0.747147	0.723978	0.732619	0.741468	0.749926	0.731849	0.721816	0.746188	0.736275	0.713982	0.741383	0.727012	0.744167	0.710512	0.740329	0.772757	0.75932	0.796303	0.75941	0.725783	0.72573	0.75256	0.829519	0.773194	0.801215	0.831342	0.777306	0.763624	0.750416	0.788301	0.775303	0.763199	0.751468	0.745976	0.740563	0.730153	0.736939	0.733348	0.729834	0.734737	0.737104
0.665507	0.69892	0.644144	0.613819	0.665449	0.609747	0.655726	0.637637	0.627891	0.618438	0.609266	0.665282	0.623325	0.603621	0.603241	0.603507	0.614252	0.645692	0.669968	0.601182	0.593353	0.60465	0.62559	0.601389	0.618382	0.62547	0.599641	0.59915	0.59866	0.642647	0.637607	0.632646	0.6671	0.671348	0.627624	0.604327	0.621761	0.615434	0.589491	0.602163	0.593283	0.607946	0.566451	0.546201	0.596049	0.545105	0.571431	0.556165	0.598976	0.587761
1.31519	1.30249	1.24151	1.19948	1.25597	1.14118	1.12796	1.10161	1.15246	1.13435	1.13834	1.27125	1.12496	1.25612	1.28932	1.29784	1.25386	1.23213	1.23713	1.25875	1.18805	1.21301	1.23741	1.23691	1.20829	1.18031	1.26709	1.09012	1.13746	1.08871	1.08077	1.05876	1.28794	1.10082	1.16901	1.08413	1.07	1.21436	1.30552	1.21611	1.10046	1.07569	1.10454	1.06725	1.05214	1.05211	1.08955	1.04827	1.03464	1.0086
																																														1.03589	0.915902	0.947033	0.951142
0.68354	0.661725	0.654245	0.670127	0.656986	0.653519	0.650243	0.677599	0.701537	0.665542	0.653486	0.68067	0.675193	0.662759	0.653799	0.684178	0.706902	0.692467	0.717164	0.674029	0.683957	0.681425	0.6722	0.694326	0.676119	0.664788	0.647637	0.662033	0.690165	0.681932	0.680713	0.657589	0.6281	0.664474	0.638601	0.660005	0.672048	0.677118	0.657412	0.694515	0.668232	0.687265	0.670735	0.709321	0.702566	0.683351	0.687456	0.688481	0.666464	0.708459
0.702644	0.692922	0.691751	0.669984	0.69381	0.6682	0.680092	0.656458	0.65797	0.658086	0.667761	0.657475	0.662119	0.654616	0.657099	0.669379	0.665993	0.667193	0.654384	0.655802	0.662352	0.688154	0.6789	0.6775	0.697544	0.694786	0.704647	0.750906	0.68772	0.709694	0.688386	0.698577	0.65214	0.673742	0.658425	0.695049	0.687357	0.665352	0.667695	0.667396	0.663992	0.677012	0.683185	0.680009	0.665511	0.657765	0.675726	0.636325	0.649622	0.632036
0.713935	0.691005	0.724593	0.707816	0.706064	0.734445	0.715632	0.696586	0.703963	0.690013	0.703971	0.709013	0.69566	0.696521	0.697384	0.689808	0.682395	0.687462	0.652155	0.666505	0.681501	0.678857	0.676234	0.677827	0.671702	0.665686	0.657661	0.649826	0.652978	0.662125	0.671532	0.684565	0.68954	0.694588	0.705314	0.714008	0.712566	0.691116	0.699009	0.707084	0.704033	0.71579	0.727946	0.711423	0.698487	0.697327	0.693916	0.693201	0.692488	0.698545
0.69563	0.710307	0.744699	0.75234	0.7179	0.728883	0.698513	0.722463	0.695977	0.682781	0.691938	0.676901	0.698794	0.707766	0.688167	0.703762	0.68149	0.681272	0.679497	0.679468	0.688613	0.674272	0.680049	0.668093	0.672754	0.704647	0.740732	0.71955	0.730758	0.721562	0.715434	0.749688	0.782593	0.745398	0.756086	0.725507	0.73234	0.732752	0.704608	0.714758	0.720217	0.736832	0.713666	0.725657	0.747768	0.717617	0.67788	0.689454	0.690947	0.714868
0.746095	0.75397	0.749825	0.759298	0.754515	0.736477	0.680299	0.768889	0.680064	0.705657	0.701428	0.657211	0.67107	0.676949	0.667616	0.684086	0.645338	0.683191	0.677086	0.658272	0.626568	0.651587	0.664331	0.616155	0.658284	0.691956	0.662586	0.725577	0.637891	0.632566	0.629004	0.662113	0.665563	0.669048	0.672571	0.664819	0.636978	0.684579	0.648765	0.616511	0.587313	0.550264	0.574652	0.621329	0.587708	0.557538	0.530314	0.555833	0.56594	0.576422
0.523133	0.541866	0.519732	0.532204	0.556861	0.555639	0.536146	0.517976	0.507931	0.514804	0.524742	0.535592	0.527942	0.520507	0.547015	0.528697	0.511567	0.526874	0.543126	0.543306	0.543485	0.536143	0.528996	0.522038	0.51526	0.508346	0.517152	0.526267	0.526838	0.537026	0.53142	0.525379	0.515497	0.518415	0.552423	0.55044	0.548472	0.552523	0.543187	0.549909	0.520586	0.521301	0.543998	0.529245	0.518019	0.519723	0.522675	0.52566	0.52868	0.506824
0.633015	0.645613	0.643214	0.64326	0.636479	0.624419	0.636844	0.61999	0.624328	0.599591	0.611081	0.606182	0.583156	0.592657	0.586454	0.568854	0.584857	0.581756	0.583108	0.579362	0.579476	0.595912	0.582216	0.591275	0.595426	0.586622	0.591015	0.583207	0.578968	0.578804	0.584584	0.588292	0.592607	0.601647	0.604459	0.621191	0.615506	0.614496	0.614876	0.619585	0.616008	0.608285	0.595924	0.599267	0.599052	0.599546	0.580192	0.596175	0.58882	0.582402
0.95846	0.957192	0.923279	0.984491	0.969198	0.988018	0.925136	0.998241	1.01676	0.997938	0.919209	0.945269	0.906382	0.929925	0.895856	1.04698	0.916407	0.889032	0.874527	0.995867	0.852459	0.83184	0.878361	0.869114	0.821533	0.906368	0.865333	0.886306	0.843782	0.874412	0.9106	0.91163	0.857127	0.848306	0.850444	0.836087	0.824293	0.868069	0.857647	0.832915	0.843139	0.838707	0.826621	0.865654	0.840519	0.861028	0.850509	0.847201	0.836876	0.828889
3.26637	3.29081	2.79462	3.20185	3.78391	4.17832	3.87285	2.73613	3.29968	3.91651	3.61912	2.68398	2.08092	2.1668	2.63508	3.36157	2.44029	2.8041	2.4873	1.90011	2.31811	2.97189	2.06735	2.50835	3.13443	2.62322	2.4236	3.10919	2.50911	2.3867	2.20202	2.04388	2.71671	3.68811	4.45664	3.01764	3.18468	3.89649	4.03104	3.38245	3.79619	3.81952	3.67486	3.68641	4.25973	3.47024	4.52466	4.70393	4.89798	3.80135
0.791738	0.807773	0.803435	0.812685	0.747104	0.852584	0.785668	0.790624	0.778408	0.804154	0.778031	0.780313	0.796975	0.790691	0.758312	0.756419	0.772964	0.764885	0.785445	0.764064	0.776876	0.778423	0.780825	0.824553	0.794248	0.83525	0.8438	0.818259	0.805575	0.839484	0.817897	0.844822	0.824689	0.841023	0.866904	0.862395	0.886592	0.862865	0.870847	0.847493	0.886584	0.919118	0.866796	0.90536	0.89876	0.933912	0.922207	0.863425	0.93673	0.977322
1.16048	1.15727	1.14558	1.13412	1.12743	1.12083	1.1143	1.10785	1.10147	1.14106	1.1836	1.22943	1.27896	1.2697	1.26057	1.25317	1.24585	1.23861	1.23146	1.22439	1.21741	1.2105	1.20367	1.19697	1.19035	1.1838	1.17732	1.17092	1.16458	1.15831	1.15211	1.14597	1.15472	1.16361	1.17263	1.17956	1.16901	1.15863	1.14845	1.07459	1.0967	1.05579	1.10212	1.08517	1.11808	1.07626	1.06672	1.0601	1.05357	0.929513
0.856071	0.857912	0.845712	0.844342	0.860413	0.842986	0.854022	0.855048	0.847143	0.853475	0.852279	0.854807	0.825934	0.836905	0.800854	0.796328	0.832739	0.82613	0.834778	0.847591	0.854426	0.845986	0.837773	0.835132	0.852359	0.837193	0.854288	0.846525	0.849141	0.863624	0.843543	0.847078	0.8598	0.847494	0.836222	0.826043	0.814779	0.75436	0.826659	0.776658	0.766123	0.771575	0.74144	0.772909	0.767956	0.772907	0.790685	0.798324	0.771875	0.765907
0.812608	0.798947	0.828586	0.819376	0.81216	0.812532	0.809607	0.811717	0.800597	0.802213	0.799096	0.788808	0.786292	0.789197	0.794443	0.780632	0.792848	0.768517	0.766801	0.786218	0.770948	0.769338	0.765561	0.756798	0.773308	0.774942	0.787887	0.787805	0.775341	0.778865	0.781555	0.782134	0.783253	0.785839	0.792371	0.78779	0.804198	0.788633	0.795728	0.816828	0.802142	0.79517	0.807287	0.836518	0.803759	0.845246	0.83269	0.836012	0.7864	0.84316
0.683155	0.654849	0.683505	0.663371	0.706228	0.7012	0.693586	0.683186	0.719684	0.74151	0.673986	0.694899	0.770362	0.683075	0.708847	0.697592	0.70775	0.695436	0.72219	0.716151	0.711431	0.685442	0.630407	0.687249	0.679158	0.710695	0.745216	0.72617	0.741323	0.659661	0.64193	0.646081	0.603319	0.618813	0.649323	0.675982	0.643559	0.616617	0.659112	0.621594	0.635504	0.600333	0.606161	0.612103	0.579274	0.5687	0.558504	0.548668	0.595958	0.583666
0.614227	0.596172	0.558134	0.570843	0.584143	0.603887	0.610721	0.608506	0.583582	0.587598	0.590931	0.572119	0.571545	0.564383	0.562104	0.574425	0.587902	0.602229	0.591088	0.592322	0.605957	0.595211	0.59996	0.592494	0.59278	0.602129	0.600612	0.589796	0.579363	0.557887	0.593284	0.631964	0.64547	0.64989	0.653945	0.647434	0.667809	0.667759	0.672986	0.659072	0.697598	0.702846	0.648855	0.690542	0.646493	0.68016	0.652071	0.634847	0.661812	0.676277
3.32146	3.05132	3.14259	3.23782	3.104	3.21536	3.63487	3.86075	3.78618	4.00906	3.62323	3.76026	3.85924	4.06234	3.96477	4.13237	4.50634	4.0643	4.39934	3.92248	4.3878	4.18989	4.0194	4.46034	4.60443	4.74769	4.70194	4.70597	4.77164	4.96359	4.94417	4.80636	4.31311	5.05679	4.6416	4.59494	4.71085	4.48123	4.527	5.04179	5.0088	4.71048	4.39705	4.44785	3.37688	4.09301	4.13692	2.81537	3.54117	4.22073
1.00906	1.0342	1.01413	0.986511	1.06338	1.00403	1.04729	1.03595	1.03956	1.043	1.05886	1.03918	0.892062	0.833283	0.913384	0.919848	0.962759	0.823627	0.860386	0.952261	0.886861	0.807293	0.914411	0.925349	0.912501	0.881559	0.946723	0.859756	0.754552	0.746892	0.860512	0.941055	0.91373	0.881092	0.950639	0.938469	0.827609	0.775475	0.846319	0.793075	0.902683	0.861289	0.885872	0.78571	0.876066	0.752445	0.901998	0.887153	0.870767	0.887758
3.07474	2.47306	2.6211	2.60065	2.34227	2.83359	2.70642	2.95167	2.71684	2.83698	3.1098	1.841	2.3595	2.73908	3.0421	2.46771	2.61947	2.67954	2.84551	2.53816	2.56151	2.54977	2.61536	2.28348	2.47631	2.32698	2.12678	2.02339	2.20753	2.08377	2.02589	1.96222	1.83464	1.72265	1.64699	1.6791	1.93652	1.63097	1.50466	1.47522	1.29347	1.31429	1.28307	1.41772	1.44069	1.40627	1.37477	1.25291	1.44982	1.50866
0.704877	0.741628	0.681336	0.696386	0.712115	0.682141	0.691956	0.740116	0.721838	0.759275	0.710905	0.738342	0.74302	0.720778	0.667662	0.725885	0.651684	0.646483	0.709609	0.643789	0.713784	0.662744	0.631895	0.692674	0.681933	0.746278	0.754295	0.760569	0.702677	0.76435	0.646375	0.66032	0.76578	0.807484	0.786875	0.773999	0.793027	0.781983	0.793598	0.803237	0.798616	0.790178	0.781057	0.782972	0.784318	0.79002	0.785514	0.759513	0.777533	0.766976
0.523662	0.513276	0.510591	0.521878	0.517603	0.518701	0.511928	0.513827	0.519042	0.536894	0.523544	0.544001	0.552983	0.53667	0.544761	0.530454	0.546881	0.531808	0.536815	0.542152	0.559815	0.549177	0.541783	0.566342	0.567523	0.580697	0.576543	0.5875	0.591172	0.58782	0.591293	0.571404	0.574286	0.579793	0.574276	0.581427	0.601962	0.56189	0.550683	0.544503	0.559922	0.555574	0.558713	0.575539	0.564537	0.56251	0.568261	0.561722	0.579224	0.564921
0.914759	0.997819	1.09747	0.895956	1.03489	0.859456	0.929039	1.01088	1.05646	0.998875	1.02552	0.959607	0.987662	0.969252	1.00075	1.04944	1.0282	0.943598	0.962136	0.939798	0.923671	0.939797	0.907599	0.907597	0.892308	0.970862	0.991477	1.03539	1.01038	0.893602	0.98659	0.979426	1.02915	1.05903	1.02532	0.993742	1.07508	0.977523	0.967984	1.01989	0.836961	0.842875	0.884602	0.973324	0.902896	0.951238	0.95034	0.849378	0.924514	1.01423
1.25315	1.17378	1.31557	1.31808	1.16809	1.15218	1.17062	1.26643	1.24451	1.20689	1.07073	1.15026	1.24257	1.35098	1.46429	1.33335	1.5508	1.48368	1.54444	1.4412	1.55021	1.47335	1.39045	1.57413	1.81373	1.54133	1.46309	1.44265	1.42278	1.336	1.29702	1.2679	1.34773	1.40559	1.46865	1.53763	2.08647	1.52802	1.20539	1.17653	1.21377	1.25346	1.29582	1.34115	1.30152	1.17707	1.11596	1.09066	1.31146	1.0599
		0.884699	0.866226	0.848509	0.831502	0.758198	0.677151	0.747513	0.819463	0.720405	0.749766	0.800837	0.675892	0.675294	0.682386	0.689627	0.774459	0.883088	0.81786	0.761606	0.712592	0.669506	0.728842	0.799718	0.885864	0.903989	0.922872	0.919864	0.916874	0.913904	0.904178	1.03398	0.963143	0.934823	1.01511	0.976535	0.909841	0.911487	0.937067	0.913472	0.90826	0.900396	0.896512	0.892661	0.913631	0.912548	1.06051	0.888463	0.913635
0.840865	0.787763	0.85602	0.826961	0.847213	0.823063	0.858274	0.883748	0.81505	0.80469	0.834105	0.813797	0.824889	0.818253	0.784106	0.805415	0.812001	0.777986	0.788814	0.789793	0.789613	0.741108	0.748264	0.769558	0.780016	0.733776	0.764171	0.797192	0.706613	0.731092	0.762377	0.666077	0.702127	0.725694	0.702873	0.717827	0.695198	0.691903	0.70366	0.702362	0.720399	0.679013	0.685376	0.670458	0.677097	0.677925	0.688698	0.690416	0.647466	0.684465
2.50788	2.97082	3.64336	3.43129	2.34565	2.5818	2.87082	3.18216	2.28776	3.14865	2.85753	3.50123	2.21766	1.62275	1.61485	1.60702	1.59927	1.9852	1.45079	1.14307	1.06387	0.994933	1.05134	1.11453	1.10685	1.10471	1.16906	1.02174	1.21634	1.09896	1.02031	0.967321	1.00438	1.18386	1.08927	1.10053	1.09951	1.09849	1.09747	1.09646	1.09544	0.978604	1.52534	3.45641	2.23662	1.6532	1.31118	1.94551	3.37828	2.8106
0.687581	0.646769	0.675455	0.667882	0.660888	0.670749	0.683142	0.696001	0.683097	0.657035	0.693808	0.681647	0.703722	0.692161	0.688238	0.690799	0.694312	0.69833	0.708709	0.707159	0.708631	0.712443	0.756828	0.748469	0.748715	0.769281	0.773599	0.800795	0.845814	0.896195	0.947823	1.17314	1.31695	1.46539	1.54208	1.32336	0.936238	0.724347	0.739864	0.669662	0.649547	0.676061	0.708551	0.699769	0.702038	0.727417	0.815902	0.928897	0.86623	0.811485
1.03864	1.0531	1.09025	1.06365	1.06423	1.04141	1.02941	1.0183	1.05389	1.03268	1.04171	1.02357	1.01897	1.0144	1.00987	1.01406	1.01829	1.02254	1.00675	0.977822	0.973009	0.967002	0.938565	0.980221	0.946077	0.936208	0.944864	0.915568	0.888518	0.910203	0.905594	0.93261	0.895164	0.882147	0.860366	0.917293	0.90908	0.901579	0.855749	0.842605	0.878076	0.852401	0.843019	0.865698	0.850229	0.802935	0.817105	0.880376	0.847451	0.812589
1.91639	2.09469	1.91427	2.08455	2.24663	2.36374	2.69514	2.07328	2.4044	2.21325	1.81017	2.22928	1.80017	1.97427	1.98028	1.91792	1.85231	1.86543	1.85536	1.85012	1.93703	2.04107	1.97462	2.07502	1.98569	2.04029	2.06042	1.92599	2.22145	2.21591	2.02365	1.91508	2.03566	1.95967	1.39248	2.09441	1.98806	2.12511	2.05998	2.23858	2.24532	2.46485	2.32221	2.50461	2.63864	2.65738	2.55146	2.68027	2.6248	2.68715
0.606827	0.616427	0.630262	0.63091	0.597219	0.648837	0.631435	0.633767	0.604782	0.622811	0.64109	0.65502	0.644472	0.644791	0.652151	0.63566	0.635003	0.651378	0.671482	0.69843	0.669708	0.657518	0.665699	0.65965	0.648268	0.652876	0.646883	0.639502	0.625312	0.721061	0.66963	0.676868	0.676148	0.680202	0.699672	0.67618	0.688226	0.678863	0.683321	0.690546	0.676155	0.704523	0.700689	0.759235	0.786793	0.780935	0.77879	0.774643	0.774076	0.80854
0.836913	0.842723	0.846581	0.860255	0.846944	0.874963	0.866532	0.873069	0.876404	0.873771	0.855846	0.895399	0.853855	0.82451	0.820824	0.815809	0.818158	0.800133	0.813352	0.789789	0.808542	0.775643	0.784331	0.793042	0.795039	0.778245	0.780593	0.750054	0.754306	0.707185	0.744579	0.753385	0.754067	0.721576	0.715077	0.731997	0.713417	0.723581	0.685396	0.687722	0.676026	0.672437	0.618917	0.594382	0.643177	0.64102	0.631985	0.623201	0.682879	0.59655
1.10879	0.939435	0.929694	0.91131	0.921358	0.898549	0.901372	0.889216	0.866294	0.899953	0.891757	0.878273	0.878394	0.937068	1.00481	0.911861	0.834648	0.989038	1.02921	0.941496	0.999384	0.959394	0.92248	0.933029	0.920966	0.87722	0.981977	0.982025	0.935305	0.892828	0.80947	0.90131	0.955182	0.929313	0.93783	0.91596	0.918424	0.865638	0.886613	0.908629	0.886395	0.856733	0.843816	0.831283	0.819116	0.828641	0.831535	0.834449	0.837383	0.840338
1.6628	2.06747	2.73245	1.79035	2.76196	2.4151	1.90343	1.62149	2.67513	2.05807	1.67232	1.40835	1.64803	1.46763	1.87251	1.68494	1.53152	1.40371	2.08955	2.22266	2.37388	2.54718	2.74778	2.31338	1.5588	1.83643	1.87526	1.91577	1.95806	1.70553	1.5107	1.70513	1.63975	1.53387	1.58051	1.63009	1.68287	1.73919	1.31974	1.48237	1.69073	2.40866	1.97014	2.14876	1.716	2.26793	1.90606	2.58661	2.94318	3.14656
1.35474	1.33483	1.31487	1.80084	1.27519	1.31591	1.46058	1.33769	1.23388	1.23958	1.24533	1.25113	1.46395	1.24575	1.47048	1.2825	1.33247	1.31492	1.36472	1.39467	1.46466	1.70587	1.52438	1.50305	1.67406	1.56954	1.64994	1.73902	1.61787	1.68395	1.84243	1.74749	1.58101	1.58354	1.645	1.60851	1.58956	1.62301	1.65381	1.59566	1.44056	1.51118	1.59422	1.68691	1.59046	1.54837	1.50845	1.49926	1.49883	1.32991
0.66111	0.6898	0.717125	0.716687	0.707212	0.697983	0.678159	0.685206	0.692401	0.699748	0.680547	0.669975	0.684872	0.635837	0.639864	0.66056	0.638554	0.667618	0.653091	0.617191	0.641616	0.622707	0.621784	0.620228	0.630394	0.685058	0.617603	0.582876	0.651462	0.677203	0.592004	0.619822	0.650384	0.65957	0.631547	0.605808	0.616356	0.627278	0.619055	0.609071	0.544204	0.585002	0.632413	0.652479	0.636805	0.602459	0.660818	0.632843	0.60714	0.583444
0.955129	1.02678	0.986532	0.954224	0.915262	0.915539	0.863685	0.852796	0.854577	0.822506	0.822649	0.833533	0.783739	0.795656	0.781554	0.767942	0.766617	0.771021	0.79643	0.780611	0.781009	0.762102	0.763196	0.746851	0.754539	0.745344	0.739042	0.732845	0.726751	0.720758	0.722338	0.72606	0.756768	0.741168	0.739256	0.733336	0.72637	0.719535	0.737968	0.706935	0.707356	0.692211	0.685749	0.677953	0.673186	0.67442	0.674646	0.661634	0.675813	0.689459
0.715162	0.711298	0.726934	0.726447	0.710367	0.706889	0.715263	0.687471	0.692074	0.686378	0.682759	0.681834	0.688481	0.684646	0.689422	0.674928	0.690138	0.679926	0.666577	0.656557	0.707019	0.675273	0.681499	0.671816	0.685128	0.681297	0.661368	0.658495	0.684528	0.683405	0.677293	0.685162	0.687971	0.690803	0.694752	0.695112	0.67839	0.685661	0.651819	0.641709	0.649304	0.639098	0.640157	0.645727	0.600962	0.608615	0.598969	0.61781	0.591954	0.57363
0.622649	0.630554	0.636712	0.62298	0.623817	0.609233	0.613244	0.625354	0.618974	0.625622	0.608867	0.640416	0.61879	0.616955	0.626017	0.616222	0.642556	0.61735	0.615615	0.631815	0.648401	0.614364	0.623246	0.627932	0.627887	0.602431	0.615685	0.607532	0.611465	0.619392	0.617412	0.617792	0.63659	0.632999	0.626339	0.625593	0.630898	0.638551	0.64808	0.643494	0.6398	0.627333	0.616591	0.593025	0.587158	0.573243	0.569974	0.583633	0.563909	0.578786
0.751784	0.727141	0.741387	0.737246	0.774848	0.754277	0.750672	0.745418	0.737408	0.752453	0.758337	0.757137	0.751929	0.758287	0.769927	0.741836	0.715723	0.746707	0.780494	0.778162	0.775844	0.734873	0.75233	0.755589	0.758875	0.747358	0.78885	0.772333	0.756494	0.791741	0.777023	0.757315	0.7402	0.758906	0.786791	0.753194	0.767185	0.767935	0.738936	0.750054	0.787666	0.744641	0.750814	0.775989	0.749741	0.760155	0.750741	0.740952	0.749955	0.74097
0.546363	0.558708	0.582811	0.646515	0.679967	0.605146	0.617462	0.63029	0.593026	0.675177	0.581053	0.612415	0.645112	0.681499	0.635795	0.649882	0.664606	0.680013	0.698378	0.61535	0.595092	0.576126	0.59434	0.613742	0.680244	0.666067	0.652468	0.639414	0.581991	0.581791	0.581592	0.581392	0.581874	0.582357	0.582841	0.583325	0.630957	0.671104	0.621792	0.705471	0.635075	0.703148	0.635349	0.754736	0.667955	0.599073	0.681919	0.655283	0.610834	0.581644
0.727458	0.796138	0.790381	0.758604	0.867578	0.837857	0.801327	0.733212	0.747132	0.761591	0.776621	0.933551	0.927483	0.94128	1.0861	0.975001	1.09067	0.969611	0.973416	0.982348	1.10681	1.14351	1.18273	1.07614	1.09102	0.980083	0.889622	0.814449	0.75099	0.696706	0.728565	0.684887	0.649853	0.614186	0.595879	0.579808	0.573741	0.557836	0.542789	0.528533	0.585616	0.656522	0.750251	0.720339	0.798441	0.895538	1.01952	0.94629	0.967791	1.17658
1.14961	1.29225	1.13925	1.21176	1.14243	1.25927	1.26142	1.32416	1.24584	1.37499	1.29882	1.38886	1.39211	1.39538	1.35403	1.31507	1.35657	1.3945	1.40217	1.32453	1.27222	1.27925	1.29958	1.21998	1.37453	1.17706	1.26312	1.12365	1.17777	1.24543	1.17584	1.24625	1.12626	1.17713	1.30905	1.16462	1.12512	1.31513	1.15256	1.22949	1.08876	1.16161	1.12969	1.12476	1.19777	1.12803	1.12491	1.21115	1.14616	1.1301
1.19749	1.1637	1.18601	1.23453	1.26204	1.26897	1.08987	1.17641	1.27748	1.1136	1.26247	1.24114	1.1935	1.25775	1.25871	1.123	1.11386	1.05021	1.13254	1.04443	1.13291	1.0226	1.04965	1.07289	1.01487	1.10543	1.05365	1.14601	1.08631	1.11881	1.09829	1.10909	1.15287	1.15176	1.13608	1.12083	1.1214	1.11665	1.11254	1.10845	1.1044	1.11697	1.07118	1.05977	1.35637	1.09461	1.09266	1.02251	1.07493	1.08018
0.68809	0.69293	0.713208	0.692686	0.688798	0.699417	0.66432	0.67956	0.661367	0.654217	0.656278	0.656671	0.651516	0.670189	0.670117	0.687427	0.699449	0.695479	0.701618	0.692081	0.715037	0.682265	0.683527	0.683566	0.682218	0.680876	0.655671	0.683	0.67658	0.699626	0.662894	0.685333	0.678983	0.666352	0.643471	0.651937	0.660628	0.669554	0.638359	0.639003	0.636599	0.645895	0.65732	0.650068	0.642974	0.646679	0.639409	0.63407	0.648472	0.640955
0.677041	0.674731	0.672259	0.682533	0.656562	0.674408	0.675112	0.662011	0.654829	0.630471	0.638238	0.625245	0.638889	0.619434	0.616824	0.617376	0.632417	0.630165	0.622773	0.610942	0.626821	0.62546	0.636538	0.636687	0.638983	0.627051	0.628317	0.6188	0.616412	0.603228	0.615989	0.618751	0.615139	0.631601	0.631011	0.625669	0.615514	0.617082	0.610978	0.603529	0.599586	0.613978	0.618829	0.610193	0.600515	0.617458	0.614699	0.616573	0.631945	0.636111
4.03942	4.17441	4.93333	6.25279	5.18581	4.75821	5.54863	6.53439	4.85926	4.91607	5.09973	7.14664	5.74859	6.55117	6.50476	6.62694	6.75379	6.63729	6.73771	6.80833	6.97641	7.04643	7.04351	6.77951	4.89751	7.34608	6.18478	5.07707	5.99436	6.38319	6.52585	6.13289	6.97029	7.08637	6.61887	6.2904	6.19717	6.34744	5.71667	5.99829	5.19544	5.15608	5.29915	6.5287	5.43049	5.65844	5.74699	5.82031	5.49095	5.57788
0.681889	0.698133	0.711273	0.691951	0.699038	0.690888	0.696517	0.69912	0.702555	0.711678	0.697094	0.732156	0.703582	0.717438	0.711491	0.684101	0.684377	0.677453	0.686388	0.680126	0.67715	0.685946	0.679737	0.681778	0.683832	0.693077	0.676714	0.677125	0.68048	0.66557	0.674437	0.645951	0.633327	0.639942	0.668131	0.645796	0.653497	0.609815	0.629305	0.636032	0.634493	0.63245	0.63781	0.643262	0.648923	0.636965	0.62281	0.624428	0.626055	0.619511
0.783951	0.773673	0.749626	0.727028	0.770745	0.721382	0.67796	0.681096	0.684262	0.687456	0.690681	0.693936	0.732583	0.724974	0.717522	0.671851	0.678317	0.683099	0.631751	0.667836	0.666766	0.669634	0.672527	0.681627	0.690977	0.700587	0.722885	0.746649	0.687562	0.689269	0.662491	0.679624	0.674381	0.678277	0.683961	0.686104	0.678248	0.685581	0.706706	0.69773	0.698804	0.69988	0.667327	0.637667	0.610531	0.646628	0.687261	0.661424	0.637459	0.697661
1.59252	1.61122	1.63035	1.4066	1.66643	2.04399	2.64277	2.36874	2.29466	2.22507	2.15957	2.494	2.95097	2.20678	2.94279	3.04637	3.15751	3.27706	3.40602	3.54555	3.69699	3.86195	3.92661	3.99348	4.06265	4.13427	3.48894	3.61312	4.54569	3.88422	4.06035	3.74036	4.5697	4.67651	4.48364	4.2458	4.44547	4.66484	4.56597	4.75816	4.9218	4.93781	4.50957	4.49883	4.61527	4.73618	4.71042	4.76717	4.74976	4.83605
1.42007	1.42249	1.42492	1.41653	1.40992	1.39336	1.40592	1.39488	1.3624	1.37708	1.43081	1.36521	1.30536	1.21105	1.33166	1.25527	1.25221	1.29252	1.21352	1.22298	1.24774	1.26117	1.27489	1.23906	1.2052	1.28005	1.2546	1.23463	1.26798	1.37429	1.29473	1.26651	1.36358	1.38653	1.41343	1.73909	1.44513	1.49093	1.48192	1.50927	1.44569	1.50025	1.34525	1.53258	1.65748	1.69355	1.57762	1.65556	1.7431	1.80635
																													0.5141	0.50944	0.51673	0.519324	0.524538	0.529858	0.524184	0.524156	0.525974	0.527805	0.538421	0.527294	0.52989	0.529553	0.522289	0.531219	0.516993	0.526361	0.527738	0.532593	0.523056
0.847785	0.872143	0.823024	0.859184	0.861886	0.774791	0.819219	0.816277	0.809387	0.820425	0.814659	0.793258	0.830599	0.815495	0.808769	0.802154	0.795645	0.840334	0.849558	0.858988	0.802176	0.80127	0.800933	0.800597	0.803888	0.807206	0.828433	0.850807	0.79058	0.790801	0.802376	0.798853	0.795361	0.795955	0.79655	0.797146	0.820947	0.800749	0.781521	0.781333	0.77704	0.765695	0.754677	0.743971	0.770861	0.799768	0.834264	0.769778	0.78925	0.78519
							0.500841	0.502762	0.504699	0.50665	0.506635	0.506619	0.506603	0.506588	0.506572	0.506556	0.506541	0.506525	0.506509	0.506494	0.506478	0.506463	0.506447	0.506431	0.506416	0.5064	0.506384	0.506369	0.506353	0.506337	0.506322	0.506306	0.506291	0.506275	0.506259	0.506244	0.506228	0.506212	0.506197	0.506181	0.506165	0.50615	0.506134	0.506119	0.506103	0.506087	0.506072	0.506056	0.506041
0.932355	0.888918	0.84997	0.866682	0.842132	0.858682	0.84857	0.905234	0.838364	0.839631	0.927661	0.816227	0.822765	0.829408	0.907549	0.891217	0.914905	0.892565	0.894954	0.886165	0.89377	0.897409	0.884131	0.902862	0.882145	0.874916	0.867805	0.885728	0.886836	0.887946	0.889059	0.908269	0.90647	0.934139	0.907374	0.894336	0.923967	0.904218	0.904083	0.905624	0.89718	0.906584	0.904237	0.892715	0.910606	0.920102	0.886894	0.912972	0.87156	0.892449
								0.500501	0.504657	0.508884	0.507212	0.505552	0.503902	0.502263	0.500635	0.501358	0.502083	0.50281	0.50354	0.504584	0.505632	0.506684	0.507741	0.508803	0.509869	0.510939	0.512014	0.513093	0.514177	0.515266	0.516359	0.517457	0.518559	0.502683	0.505592	0.508534	0.530456	0.539844	0.518458	0.511359	0.512262	0.513167	0.513032	0.512897	0.501974	0.510683	0.519698	0.529038	0.521313
1.1024	1.0346	1.03616	1.10376	1.04281	1.01685	1.0459	1.02226	0.970105	1.06123	1.00427	0.991966	1.07428	0.9717	1.01971	1.04007	1.02199	1.00453	0.87491	0.870823	0.871383	0.871289	0.871196	0.802215	0.854767	0.878428	0.854734	0.832214	0.851769	0.883605	0.901523	0.85129	0.845921	0.897133	0.857777	0.907635	0.896337	0.861923	0.862152	0.852422	0.842909	0.848742	0.854657	0.85822	0.875224	0.839687	0.884916	0.882908	0.880909	0.895619
2.80592	2.94482	2.58277	2.88507	2.83205	2.79219	2.81185	3.31806	2.87157	3.41858	3.77771	3.31909	3.34843	3.76423	3.53156	3.37502	3.65148	3.3288	3.64714	3.81362	3.71328	3.76702	4.00306	4.12217	4.01372	4.00625	3.97653	4.27359	4.26322	4.04617	3.97274	3.80647	4.33784	4.1662	3.89782	4.02499	4.03853	4.0593	3.8717	4.06508	3.66242	4.25158	3.66408	3.41645	3.36822	3.33932	3.15172	2.57677	2.82892	2.49935
1.43229	1.29783	1.4555	1.47013	1.40385	1.29554	1.50937	1.3802	1.34078	1.29363	1.43501	1.46876	1.43972	1.41181	1.4162	1.44914	1.25619	1.32759	1.33244	1.31299	1.45433	1.46824	1.28199	1.28456	1.32644	1.25721	1.31493	1.3782	1.32836	1.43572	1.48513	1.48922	1.49333	1.54587	1.5232	1.36389	1.44876	1.41424	1.3556	1.46413	1.53496	1.57028	1.56295	1.54254	1.52265	1.4989	1.41982	1.44156	1.38843	1.40096
0.952704	0.931209	0.994836	0.977071	0.98344	0.923136	0.903417	0.906263	0.896056	0.871029	0.85779	0.864197	0.873045	0.847035	0.844459	0.878907	0.82031	0.78855	0.759846	0.805288	0.855526	0.882025	0.79331	0.876609	0.831437	0.804686	0.816774	0.795214	0.784124	0.808104	0.829776	0.943796	0.963128	0.793895	0.788338	0.910359	0.80031	0.959328	0.839133	0.878153	0.913676	0.766148	0.802239	0.866708	0.796325	0.780118	0.792549	0.739413	0.7554	0.757499
1.6113	1.5662	1.51978	1.51031	1.51252	1.50476	1.51112	1.40453	1.49486	1.4571	1.47897	1.47277	1.3958	1.4195	1.44403	1.43795	1.43192	1.2671	1.39536	1.2689	1.36838	1.29554	1.33658	1.38226	1.41682	1.43355	1.43243	1.46779	1.50494	1.42295	1.34944	1.37614	1.10207	1.24737	1.20645	1.19511	1.18399	1.21972	1.24806	1.26899	1.24401	1.25715	1.22181	1.19123	1.27877	1.21701	1.30375	1.25118	1.27033	1.26787
0.810338	0.819671	0.814618	0.7678	0.83559	0.765691	0.788405	0.754334	0.733094	0.743245	0.724839	0.733737	0.73038	0.71259	0.678461	0.739626	0.759566	0.776866	0.773097	0.771769	0.774096	0.786291	0.768776	0.785774	0.786499	0.739516	0.758779	0.746056	0.755478	0.748827	0.741951	0.748684	0.737379	0.717264	0.723872	0.71549	0.711113	0.737559	0.750256	0.747008	0.757221	0.767718	0.804236	0.755562	0.778833	0.767062	0.802292	0.763433	0.779594	0.783744
0.838464	0.82291	0.835905	0.849318	0.836642	0.824339	0.826358	0.828387	0.830426	0.832474	0.836138	0.833089	0.825304	0.787499	0.830551	0.822546	0.814693	0.811091	0.825531	0.771679	0.814314	0.804318	0.804061	0.799542	0.795073	0.793973	0.785768	0.808949	0.802447	0.782284	0.76311	0.812688	0.801806	0.833701	0.794211	0.798523	0.795225	0.780596	0.807739	0.758551	0.788017	0.791125	0.794256	0.797413	0.800595	0.823282	0.795539	0.772032	0.797372	0.771226
1.16704	1.18126	1.23973	1.13783	1.25819	1.16139	1.14764	1.24063	1.11497	1.28096	1.30032	1.30077	1.25275	1.20814	1.1666	1.20596	1.17498	1.18938	1.20415	1.17688	1.17647	1.1416	1.1623	1.14942	1.19635	1.10613	1.13568	1.16685	1.15213	1.13778	1.12378	1.30603	1.30071	1.05717	1.07724	1.09809	1.11977	1.14231	1.16579	1.26729	1.2372	1.2085	1.18111	1.15493	1.07925	1.33801	1.19012	1.44393	1.34274	1.2548
3.05553	3.32872	3.05036	3.12707	3.09228	3.08086	2.27329	2.42947	3.05501	2.72685	3.0392	2.80348	2.95456	2.90783	2.59901	2.39759	2.66081	2.14543	2.65688	2.77739	2.76601	2.87074	2.87564	3.29981	2.62657	2.63269	2.79757	3.02416	2.84254	2.90168	2.85125	2.83427	2.95148	2.45124	2.72085	2.89028	2.73306	2.95922	2.61411	3.07528	2.96659	3.17429	3.45117	3.26423	2.90405	3.39984	3.57872	3.68008	3.17175	2.82426
1.01771	1.0107	1.04249	1.01949	1.01647	1.02853	1.05304	1.08589	1.01957	1.03933	1.06213	1.03086	1.01705	0.97481	1.0083	1.02321	1.04018	1.00425	1.10088	1.0619	1.06212	0.983781	1.01608	1.03252	1.06723	1.02242	0.994889	0.993548	1.01409	1.02461	0.992357	0.91163	0.989969	0.970043	1.03015	0.994741	0.992144	0.986406	0.973641	0.99704	0.941536	0.970999	0.940276	0.949198	0.977816	0.93904	0.957073	0.988894	0.980148	0.960407
0.817357	0.914734	0.903635	0.892802	0.882226	0.868448	0.881281	0.865773	0.858951	0.867199	0.860628	0.885537	0.878363	0.866665	0.867392	0.80387	0.816813	0.856347	0.824195	0.833866	0.853498	0.811697	0.822951	0.805201	0.827917	0.775918	0.753006	0.766654	0.785134	0.783128	0.758023	0.77584	0.772428	0.783877	0.778932	0.778459	0.840679	0.764941	0.781598	0.769921	0.755574	0.759347	0.770373	0.756469	0.748955	0.739286	0.740381	0.751221	0.735799	0.720467
0.673579	0.685465	0.678905	0.683976	0.67269	0.676988	0.666067	0.669171	0.648864	0.64972	0.630762	0.641116	0.636914	0.636222	0.648646	0.63473	0.643676	0.629086	0.627134	0.646646	0.640495	0.648836	0.653055	0.645375	0.64802	0.656888	0.647765	0.636043	0.650549	0.653965	0.651599	0.643443	0.653589	0.640541	0.630139	0.651014	0.637045	0.636471	0.661361	0.626241	0.634399	0.642532	0.619763	0.613853	0.613635	0.606703	0.60773	0.614149	0.599503	0.585762
0.824002	0.80932	0.781149	0.794583	0.799016	0.794744	0.777938	0.741393	0.764667	0.755037	0.728797	0.729636	0.716547	0.724645	0.709865	0.688915	0.698629	0.714866	0.692498	0.669672	0.695908	0.69629	0.699688	0.692651	0.686704	0.685962	0.676031	0.677505	0.674957	0.685078	0.679808	0.700212	0.705077	0.712492	0.70174	0.700093	0.702644	0.713982	0.722554	0.722345	0.720758	0.720453	0.713566	0.709493	0.715223	0.702573	0.722183	0.72338	0.726912	0.722882
0.641318	0.643104	0.628092	0.643325	0.634901	0.627578	0.631084	0.615676	0.609133	0.605153	0.607806	0.596961	0.600883	0.611349	0.614275	0.612113	0.604309	0.61219	0.613272	0.614038	0.609464	0.616569	0.618447	0.607877	0.597882	0.61437	0.613929	0.614214	0.605462	0.618204	0.626737	0.617076	0.607302	0.632854	0.62983	0.620558	0.623266	0.625229	0.634103	0.624528	0.614518	0.631587	0.626494	0.630369	0.642567	0.655247	0.646207	0.623995	0.660804	0.675692
1.23698	0.992067	0.828107	0.858123	0.885012	0.873924	0.86311	0.924392	0.902707	0.908917	0.894595	0.880718	0.882845	0.884983	0.901598	0.918849	0.936773	0.967764	0.93093	0.989514	0.916992	0.985762	0.942092	0.954033	0.967337	0.999848	1.00186	0.993956	1.00619	0.947169	0.948478	1.00771	1.00287	0.934181	0.948795	0.991379	0.978209	0.983573	0.945792	0.997739	1.00248	1.02809	1.07413	1.04461	1.01667	0.989825	0.969002	0.958839	0.976509	1.0172
0.857439	0.888192	0.823827	0.845845	0.815686	0.821187	0.826762	0.826059	0.770035	0.781655	0.788514	0.813852	0.777636	0.779077	0.79852	0.816018	0.813815	0.851441	0.79641	0.82102	0.848472	0.775988	0.798847	0.801517	0.798528	0.799649	0.803622	0.772211	0.837023	0.797135	0.778059	0.73924	0.80077	0.776117	0.752938	0.813554	0.872307	0.782968	0.835614	0.767869	0.856913	0.777411	0.762683	0.780078	0.798286	0.817363	0.798342	0.791605	0.81592	0.800786
0.818682	0.894498	0.963263	0.954148	1.09595	1.03821	0.986249	0.946901	0.913447	0.907197	0.901031	0.894949	0.888948	0.883028	0.958296	0.929355	0.982678	0.934863	0.864052	0.947858	0.956642	1.10187	0.900937	0.936501	0.974988	1.01291	1.04956	1.1498	1.09296	1.07213	1.1459	1.23058	1.32876	0.999309	0.84702	0.927987	1.02607	0.931069	0.996032	1.22076	1.01357	0.905359	0.892915	0.880809	0.869026	0.975743	1.07685	0.959268	1.0882	0.96998
0.959604	0.975375	0.947524	0.964957	0.932355	0.892022	0.930093	0.93076	0.932694	0.843813	0.876986	0.768159	0.800719	0.757851	0.718656	0.722252	0.669815	0.671298	0.697317	0.68254	0.652835	0.659173	0.690802	0.683824	0.721995	0.741698	0.74294	0.705712	0.773566	0.779225	0.830826	0.801672	0.818467	0.831616	0.855974	0.875652	0.881933	0.856547	0.864155	0.871753	0.86718	0.86304	0.856259	0.860975	0.864415	0.868539	0.857929	0.875421	0.852082	0.871825
2.51262	2.56588	2.51235	1.39073	0.96148	0.834494	0.892537	0.861627	0.946933	0.790969	0.83926	0.894173	0.814778	0.804312	0.841632	0.834376	0.849497	0.965791	1.11898	0.96818	0.893782	1.07637	0.96845	0.948051	0.854068	0.874355	0.928387	0.841455	0.885669	0.934786	0.823174	0.932907	0.842412	0.900929	0.856678	0.846316	0.842492	0.830687	0.819208	0.867196	0.856325	0.866726	0.886117	0.872621	0.853651	0.851726	0.795877	0.803017	0.809085	0.851309
0.900437	0.920041	0.917186	0.888744	0.907731	0.906364	0.889665	0.862003	0.867149	0.874627	0.865071	0.827796	0.840883	0.870442	0.826309	0.908782	0.851264	0.858989	0.868329	0.907651	0.879774	0.881186	0.867959	0.862015	0.857625	0.873161	0.87322	0.877018	0.823837	0.824699	0.842039	0.81059	0.834094	0.770013	0.80844	0.773703	0.784658	0.831466	0.825695	0.855728	0.803553	0.829237	0.877379	0.877027	0.892056	0.884154	0.81838	0.912072	0.850046	0.896744
0.650843	0.680027	0.747792	0.658838	0.647012	0.609606	0.653946	0.576827	0.649732	0.672163	0.675415	0.657344	0.659036	0.571286	0.65873	0.690035	0.677128	0.687343	0.678997	0.670851	0.662898	0.701293	0.620012	0.625087	0.66493	0.676034	0.664761	0.653858	0.691212	0.713547	0.669452	0.657506	0.660325	0.663167	0.648016	0.633541	0.698106	0.6612	0.628	0.65348	0.675642	0.69936	0.704247	0.674886	0.688373	0.702409	0.677106	0.781809	0.77416	0.76666
1.71367	1.76852	1.68464	1.76562	1.64894	1.63901	1.55784	1.58153	1.4813	1.63066	1.84173	1.39384	1.37653	1.35453	1.48974	1.46624	1.58143	1.55622	1.50556	1.5573	2.10304	1.41694	1.43733	1.72594	1.76974	2.30603	2.2276	2.3161	2.76696	2.59626	2.34822	1.98857	1.9802	1.96994	2.06989	1.98429	1.92195	2.42454	1.94775	2.28079	2.01673	2.49968	2.20257	2.07649	2.26878	2.50319	1.93065	2.27664	2.34948	2.43896
0.668836	0.667321	0.693957	0.68708	0.700173	0.707866	0.721879	0.694035	0.692811	0.695847	0.682203	0.681345	0.674032	0.690641	0.662048	0.665056	0.668457	0.669117	0.656167	0.632203	0.653051	0.655331	0.647419	0.650713	0.641622	0.641218	0.646387	0.658096	0.682078	0.672401	0.666045	0.708522	0.734139	0.719495	0.716304	0.696437	0.716536	0.738424	0.750325	0.741659	0.741314	0.750868	0.759701	0.73899	0.727788	0.724617	0.7075	0.72746	0.702035	0.72289
2.17286	2.22327	2.17693	2.14135	2.18292	2.21574	2.28323	2.26359	2.47215	2.43792	2.44778	2.46563	2.49583	2.4601	2.45501	2.38515	2.34669	2.43991	2.43561	2.37666	2.43135	2.38526	2.3472	2.37774	2.33235	2.32948	2.36096	2.29663	2.33427	2.32105	2.27641	2.33219	2.37594	2.31486	2.24447	2.22079	2.11216	2.18098	2.18451	2.21119	2.158	2.23225	2.1596	2.14981	2.16511	2.12824	2.09128	2.24089	2.13914	2.17086
	1.14968	1.12918	1.11365	1.14112	1.11132	1.15748	1.13647	1.08688	1.15404	1.13874	1.05579	1.10986	1.10287	1.12288	1.10825	1.1198	1.12225	1.11013	1.12198	1.10566	1.08949	1.14496	1.09985	1.09956	1.09733	1.11805	1.09084	1.1125	1.10316	1.08783	1.06648	1.13788	1.11092	1.15012	1.15927	1.10098	1.11574	1.09015	1.05797	1.07087	1.03664	1.01769	1.01994	0.976764	0.98765	0.985422	1.01682	1.01647	0.998131
	0.789523	0.76686	0.771502	0.7762	0.867565	0.831956	0.715326	0.850755	1.04944	0.911913	0.969398	0.905944	0.847784	0.901916	0.881659	0.917829	0.976392	1.03762	0.934129	1.08279	1.05906	0.946255	0.855169	0.851317	0.92189	0.879123	0.866272	0.833661	0.849292	0.834485	0.796643	0.825742	0.853092	0.804863	0.796501	0.833744	0.800902	0.801896	0.738912	0.832902	0.817832	0.768123	0.762549	0.737532	0.777323	0.808615	0.778991	0.826723	0.823356
	1.08085	1.14143	1.20921	1.19314	1.17749	1.22957	1.23867	1.22727	1.21608	1.05186	1.03041	1.00982	1.06797	0.945978	0.909251	1.05032	1.01472	1.04234	1.0702	0.950961	0.927588	0.923331	0.983736	0.966844	0.876143	0.90186	0.892467	0.902249	0.93051	0.960599	0.992699	0.993577	1.05531	0.986274	0.925717	1.03229	0.999074	1.02972	1.02937	0.993625	0.967824	0.921356	0.914045	0.987398	0.939476	0.941064	0.936375	0.965	0.99543
	1.11331	0.990935	1.15146	1.37405	1.1904	1.05005	1.02015	1.13412	1.27676	1.2356	1.19702	1.29344	1.09335	1.40196	1.06598	1.364	1.23847	1.13409	1.04594	1.11922	1.07803	1.03888	1.03794	1.03699	1.03775	1.03851	1.08683	1.08475	1.06131	1.1059	1.10622	1.10654	1.04775	1.03318	1.04922	1.02951	1.0648	1.1026	1.15542	1.18833	1.21244	1.22106	1.25948	1.26202	1.20183	1.14713	1.30617	1.30057	1.21102
	0.981524	0.960199	0.965885	0.969895	1.04826	1.03149	0.861552	1.03052	0.933974	1.11071	1.06448	1.02194	1.00852	0.955074	0.907006	0.860701	1.081	1.03248	0.974751	0.97003	0.965355	0.960725	0.923971	1.01026	1.05549	1.01814	0.991312	0.965865	0.856272	0.876842	1.00469	0.99229	0.97954	0.967114	0.954999	0.943185	0.931658	0.920411	0.909431	0.89871	0.872234	0.847273	0.88454	0.925236	0.969858	1.019	0.958133	0.904125	0.856888
	5.3688	5.08676	5.89334	6.09654	6.03214	5.96909	5.90734	5.96829	5.7225	5.96553	6.23012	6.51927	6.83656	7.18632	7.39287	7.47817	7.56546	7.65481	7.7463	7.84	7.83168	7.82338	7.52069	7.30246	7.51321	7.56966	7.62695	8.21456	8.00403	7.80402	7.70426	7.84447	7.98988	8.01026	7.86282	8.13023	7.69496	7.96289	8.2292	7.16559	7.53913	7.95376	8.23013	8.5264	8.84479	8.47096	8.12745	7.81072	7.51774
		0.939017	0.926625	0.924719	0.922399	0.920091	0.926839	1.03627	0.922581	0.924146	0.925716	0.927292	0.944881	0.93888	0.944277	0.949121	0.934825	0.949696	0.916533	0.922531	0.928608	0.914575	0.917861	0.919407	0.920461	0.907007	0.927289	0.918174	0.896489	0.904122	0.895137	0.896527	0.886412	0.878295	0.86052	0.889518	0.866023	0.880291	0.875034	0.893627	0.888181	0.882801	0.874441	0.880718	0.884173	0.881262	0.87837	0.878107	0.879517
																																0.948167	0.968338	0.970726	0.973127	0.975539	0.935133	0.962816	0.992189	0.957779	0.946556	0.997816	0.99845	0.999084	0.984507	0.970349	0.956592	0.94322	0.985229
			1.19048	1.18108	1.17183	1.16272	1.15376	1.14493	1.15056	1.15909	1.16774	1.1652	1.12227	1.09035	1.07597	1.06196	1.05335	1.01241	0.902701	0.910296	0.926249	0.939718	0.883767	0.869701	0.847234	0.82058	0.804062	0.786837	0.764109	0.759629	0.748006	0.753024	0.714511	0.748389	0.659769	0.692356	0.675363	0.662317	0.64259	0.64902	0.647721	0.648386	0.633365	0.649814	0.596238	0.607452	0.591891	0.593007	0.582908
																		1.01973	1.08979	1.13845	1.30199	1.25858	1.28093	1.30408	1.32809	1.35301	1.34158	1.31971	1.30239	1.51659	1.42377	1.3941	1.31991	1.33736	1.32189	1.33018	1.39694	1.30117	1.35448	1.39897	1.44648	1.44435	1.55442	1.4648	1.38494	1.48271	1.53178	1.58421	1.64035
																			0.884879	0.893051	0.916024	0.927237	0.91941	0.943927	0.925738	0.902938	0.908332	0.913465	0.888789	0.87409	0.906125	0.894498	0.912637	0.918842	0.884104	0.884845	0.885588	0.92656	0.932252	0.899857	0.906769	0.934483	0.888479	0.874982	0.851452	0.829155	0.832219	0.914728	0.888728
																					0.866948	0.871842	0.876791	0.881797	0.875737	0.887781	0.900161	0.912891	0.934333	0.902304	0.872398	0.922846	0.895248	0.920918	0.89928	0.878635	0.890064	0.901794	0.824971	0.924403	0.893878	0.865305	0.96646	0.90632	0.911191	0.9059	0.900671	0.90675	0.896674
																														0.891256	0.870622	0.850921	0.832092	0.814079	0.842037	0.871985	0.90414	0.891906	0.879998	0.8593	0.839552	0.791371	0.783369	0.798261	0.815578	0.88846	0.90576	0.866505	0.830511
																															0.778573	0.771819	0.751127	0.767157	0.752091	0.781705	0.758064	0.815977	0.759656	0.774108	0.816446	0.774207	0.766941	0.772702	0.762816	0.738016	0.77337	0.757801	0.770295
																																							1.31325	1.49873	1.47123	1.42017	1.43261	1.67553	1.66074	1.5435	2.08782	2.2883	1.864
																																									1.17268	1.17181	1.11141	1.05693	1.12008	1.1535	1.14259	1.13188	1.08808
																																									0.633574	0.628406	0.620478	0.649493	0.627448	0.606851	0.613125	0.612014	0.613355
																																																	0.91903
Tx dosing: 4mM Gluc
0.952092	0.944894	0.948874	0.934394	0.922154	0.938296	0.927015	0.906659	0.931798	0.905129	0.941853	0.907661	0.936424	0.959395	0.961823	0.982725	1.00876	0.998808	0.997473	0.992789	0.994692	0.978099	0.974552	0.979686	0.999929	1.00291	1.03328	0.997445	1.00517	1.04393	1.01124	1.00972	1.0445	1.04906	1.07502	1.13527	1.13691	1.18895	1.19241	1.1995	1.20345	1.19275	1.23309	1.18291	1.23613	1.17994	1.20197	1.17088	1.19671	1.1984
0.645299	0.660269	0.625128	0.689484	0.631044	0.638937	0.636433	0.645021	0.646193	0.639806	0.602926	0.632393	0.603888	0.613277	0.653706	0.594323	0.675766	0.645002	0.676432	0.611066	0.617589	0.659976	0.680398	0.629044	0.682585	0.660913	0.67024	0.653106	0.68166	0.678837	0.664074	0.755106	0.721745	0.687878	0.688032	0.752831	0.831105	0.762491	0.858594	0.908241	0.911808	1.03812	1.0786	1.03072	1.0747	1.06848	1.07129	1.09154	1.04831	1.14588
2.24516	2.15901	1.95175	2.02748	1.98601	1.89857	1.90778	1.93709	1.87172	1.93309	1.83011	1.79677	1.7497	1.82727	1.76896	1.99942	1.90921	2.27939	1.90098	1.92152	2.09	2.17426	2.01882	2.05133	1.75807	1.7573	2.12591	1.95565	1.88038	1.58175	1.5718	2.08535	1.855	1.85769	2.10037	2.26549	2.55054	2.61589	2.0165	1.9263	2.05962	2.06618	2.02933	1.77094	2.39357	2.02831	2.11128	2.07484	2.01734	2.0573
0.543941	0.519445	0.52622	0.527825	0.535187	0.526528	0.546082	0.517843	0.54098	0.531994	0.536106	0.543387	0.520988	0.529153	0.535088	0.511758	0.518961	0.51327	0.505353	0.503253	0.501171	0.503096	0.505036	0.506991	0.517661	0.528901	0.523449	0.530804	0.537388	0.547953	0.541613	0.610961	0.609584	0.597819	0.602224	0.621835	0.609579	0.621115	0.64016	0.64616	0.642376	0.65409	0.658432	0.664232	0.648616	0.673678	0.673729	0.675467	0.65874	0.661236
0.988737	0.987828	1.03284	1.0067	1.02153	0.975945	0.965906	0.990332	0.955981	0.961381	0.969701	0.953007	0.926601	0.921428	0.947869	0.919807	0.94508	0.913339	0.912409	0.927941	0.948262	0.937937	0.921973	0.933454	0.916056	0.913466	0.953739	0.92339	0.919383	0.930452	0.9554	0.976132	0.992418	0.997166	1.01391	1.07971	1.10875	1.17657	1.22383	1.28456	1.27294	1.30527	1.30974	1.32974	1.30378	1.30159	1.31961	1.3718	1.34241	1.36571
0.953043	0.974389	0.882613	1.18699	1.81181	1.47866	1.53672	1.99381	1.8594	2.22493	2.42649	1.93395	2.25948	2.24697	2.79307	1.89138	1.4298	1.7528	1.82193	1.89675	2.26137	2.51539	2.46404	2.41473	2.36736	2.50413	2.31045	2.14634	2.19436	3.22338	3.41136	3.59872	3.81601	3.79201	3.38279	3.83628	4.49587	4.00369	3.69355	2.05901	1.42735	1.29998	1.31315	1.37009	1.28378	1.30119	1.72138	1.97099	2.51358	2.27233
1.45696	1.40874	1.38295	1.39746	1.37626	1.38758	1.34884	1.38152	1.36091	1.3465	1.33592	1.29861	1.30088	1.22744	1.26811	1.25732	1.27989	1.24317	1.23083	1.24868	1.23174	1.24044	1.2252	1.23326	1.22868	1.20217	1.21467	1.19721	1.22951	1.22394	1.21564	1.27615	1.25342	1.26942	1.31146	1.35366	1.43897	1.42065	1.50365	1.52121	1.53493	1.56282	1.59436	1.60509	1.62201	1.69209	1.69022	1.74347	1.7137	1.73891
1.20652	1.23825	1.23421	1.23383	1.25807	1.23532	1.30186	1.30251	1.26292	1.2972	1.32117	1.34849	1.3166	1.38822	1.42823	1.38805	1.33131	1.37013	1.47519	1.39908	1.3843	1.38004	1.42764	1.43828	1.41493	1.43305	1.49504	1.45849	1.5364	1.54904	1.5276	1.60979	1.67483	1.5866	1.57986	1.56809	1.5671	1.59542	1.58047	1.6175	1.53735	1.51716	1.56552	1.51807	1.53305	1.48986	1.55102	1.62636	1.64612	1.56282
0.921871	0.888765	0.87337	0.883955	0.86393	0.839706	0.854804	0.837579	0.850521	0.817211	0.834475	0.846888	0.888983	0.869135	0.864052	0.849976	0.825023	0.824135	0.816256	0.830964	0.84217	0.839832	0.851542	0.832237	0.845916	0.843278	0.836156	0.824892	0.819994	0.829226	0.830787	0.877838	0.867031	0.909897	0.921074	0.989716	1.03894	1.08781	1.13688	1.18979	1.26084	1.2897	1.31928	1.30752	1.30248	1.39199	1.34214	1.36712	1.35224	1.41876
0.642829	0.626799	0.581377	0.632631	0.584092	0.618134	0.567195	0.59531	0.557797	0.598262	0.599959	0.599693	0.55042	0.55849	0.562094	0.59098	0.591675	0.584404	0.559402	0.582029	0.595155	0.589012	0.588122	0.590773	0.593447	0.596146	0.59887	0.60775	0.616897	0.626324	0.636043	0.646069	0.656416	0.645925	0.642439	0.635231	0.648646	0.644493	0.661434	0.670179	0.698816	0.700096	0.735235	0.732844	0.751505	0.800873	0.729535	0.774991	0.780263	0.776249
0.649586	0.657058	0.646383	0.640021	0.6303	0.654463	0.628341	0.611451	0.590396	0.625002	0.621238	0.619406	0.621527	0.612842	0.601183	0.612776	0.606638	0.603232	0.618308	0.612557	0.61791	0.605592	0.605906	0.606853	0.62247	0.627325	0.608995	0.616614	0.598108	0.593481	0.580303	0.607763	0.596324	0.585703	0.575515	0.57992	0.590593	0.615181	0.619252	0.630456	0.636975	0.649701	0.645683	0.661378	0.641936	0.645347	0.653643	0.636918	0.627776	0.642506
1.30142	1.23444	1.53458	2.02754	2.14108	2.22117	2.0642	1.90668	2.05846	2.27824	2.42282	1.98583	1.93023	1.69284	1.86066	1.70568	1.57096	1.53122	1.14953	0.920159	0.767098	0.657695	0.666263	0.612734	0.584763	0.594237	0.638248	0.631358	0.594632	0.668914	0.637866	0.652502	0.658058	0.698617	0.720491	0.74378	0.839524	0.96356	0.994909	1.1545	1.40085	1.4797	1.48368	1.16147	1.11012	1.32346	1.63831	1.59482	1.95678	1.86946
1.45057	1.52053	1.45691	1.55435	1.50328	1.59081	1.57044	1.54378	1.58359	1.54861	1.43981	1.46319	1.54144	1.58548	1.57293	1.53402	1.51414	1.45601	1.60789	1.61595	1.62305	1.53067	1.77443	1.7892	1.6684	1.62116	1.59262	1.54663	1.5653	1.58342	1.58781	1.50432	1.55683	1.65787	1.62475	1.5979	1.58834	1.59669	1.62336	1.65202	1.64624	1.5445	1.60129	1.56191	1.62459	1.63082	1.60202	1.52426	1.59195	1.48207
0.985625	0.980613	0.985369	0.891562	0.899492	1.00247	0.878045	0.964134	0.921613	0.923608	0.942854	0.904077	0.907152	0.908441	0.922575	0.940915	0.934442	0.925478	0.905303	0.869888	0.90673	0.898675	0.930871	0.965458	1.00272	0.931044	0.949452	0.912514	0.919044	0.97924	0.966232	1.01422	1.1129	1.04324	1.04141	1.14709	1.07611	1.12038	1.15564	1.23689	1.19425	1.28513	1.23227	1.24028	1.26258	1.34289	1.33913	1.42275	1.62481	1.44118
0.651863	0.632557	0.612772	0.626005	0.626687	0.612384	0.618291	0.625182	0.618767	0.606546	0.628574	0.596415	0.587833	0.60558	0.594402	0.637434	0.626471	0.633667	0.623408	0.609889	0.631249	0.634032	0.616188	0.612485	0.645121	0.627621	0.643934	0.642743	0.627707	0.640236	0.646387	0.693815	0.713849	0.706058	0.764712	0.76183	0.753722	0.766928	0.772907	0.79436	0.792578	0.803442	0.818109	0.831324	0.844515	0.840279	0.854024	0.865117	0.888336	0.876211
0.811761	0.686142	0.824211	0.71487	0.797407	0.821215	0.787894	0.763198	0.868258	0.841182	0.752763	0.787276	0.771199	0.877451	0.863285	0.865919	0.951138	0.869163	0.923627	0.854393	0.842155	0.9187	0.866261	0.964367	0.845253	0.878153	0.887079	0.889808	0.830698	0.993743	0.940317	0.958223	1.02184	1.02915	1.0323	1.13327	1.13091	1.27744	1.29478	1.31085	1.32672	1.38106	1.36545	1.35925	1.42541	1.43374	1.451	1.40507	1.40938	1.37723
0.845048	0.857114	0.868923	0.876289	0.848361	0.848202	0.847231	0.849023	0.850811	0.836857	0.819644	0.829036	0.801881	0.819505	0.822911	0.823387	0.842094	0.812207	0.826577	0.799584	0.809853	0.818691	0.811982	0.81943	0.813295	0.80936	0.807573	0.798901	0.816845	0.797066	0.814209	0.813338	0.843905	0.844216	0.857634	0.881755	0.898092	0.955171	0.977792	1.01888	1.03175	1.05023	1.07548	1.09685	1.12297	1.12364	1.14796	1.17018	1.16468	1.18107
1.00831	0.991327	0.993396	1.00358	0.960824	0.967257	0.961364	0.939952	0.958539	0.978505	0.963664	0.952052	0.964946	0.963514	0.942898	0.941072	0.928308	0.922138	0.926204	0.907796	0.909138	0.920391	0.93184	0.892443	0.89477	0.913214	0.904609	0.918289	0.914263	0.908418	0.918858	0.932079	0.93324	0.972141	0.974924	1.02125	1.05337	1.07438	1.09407	1.13288	1.19933	1.26057	1.26173	1.27866	1.29319	1.32919	1.36436	1.34192	1.34716	1.36202
0.567886	0.646886	0.643879	0.737663	0.74345	0.768226	0.881313	0.851346	0.751691	0.672921	0.717358	0.76808	0.797775	0.701087	0.801547	0.78346	0.770635	0.775485	0.786743	0.775496	0.715092	0.743927	0.730168	0.733212	0.706656	0.746463	0.70173	0.700316	0.651185	0.664914	0.752873	0.868483	0.850057	0.83354	0.840207	0.846982	0.805393	0.808876	0.784222	0.778669	0.788719	0.810904	0.867405	0.842745	0.872364	0.863631	0.840791	0.801206	0.80749	0.696618
1.23644	1.27783	1.25283	1.27071	1.28029	1.27638	1.31614	1.32253	1.30195	1.3093	1.30613	1.32074	1.28005	1.23528	1.23589	1.23259	1.24647	1.25275	1.24238	1.21383	1.21675	1.13738	1.17195	1.15273	1.15171	1.12239	1.10381	1.08584	1.06844	1.0516	1.03527	1.07406	1.07474	1.09026	1.09135	1.13646	1.14616	1.15464	1.13819	1.1368	1.13772	1.21275	1.21853	1.05104	1.10358	1.22234	1.22541	1.1903	1.25648	1.31387
1.48827	2.00849	3.08784	3.53705	3.31421	2.92686	3.38425	2.63534	3.13508	3.68526	3.29245	3.26719	3.42312	3.36485	3.66591	3.70227	4.14059	3.71864	4.59755	3.47483	3.6333	3.08714	3.48433	4.7294	4.94658	3.71783	3.74325	4.04951	4.63235	3.96932	3.70589	4.32745	4.18853	3.95003	3.99619	3.95151	4.12484	3.46758	4.71888	5.41409	4.43459	4.92456	4.32274	4.47139	4.7058	4.517	4.38466	4.48036	4.10053	3.84498
0.878614	0.911689	0.832067	0.87636	0.817083	0.936224	0.789604	0.863845	0.854932	0.786827	0.829619	0.855732	0.796547	0.741984	0.770934	0.829578	0.792267	0.750145	0.758298	0.729005	0.858577	0.75935	0.721878	0.866885	0.828823	0.793962	0.917917	0.901083	0.948206	0.858856	0.784895	0.828643	0.701465	0.608131	0.680801	0.777326	0.905745	0.910425	0.915153	0.919931	0.966749	0.95453	1.02864	1.00199	1.02959	1.04089	0.950843	1.05368	1.10166	0.947114
0.646354	0.666799	0.639991	0.627991	0.6572	0.628689	0.626956	0.638224	0.630636	0.644081	0.638339	0.612347	0.60426	0.612525	0.619517	0.628478	0.628419	0.631876	0.617057	0.627276	0.618609	0.628035	0.624504	0.625231	0.634882	0.648842	0.621727	0.636957	0.639898	0.632632	0.629452	0.649286	0.659914	0.651856	0.648594	0.644789	0.677203	0.665561	0.673289	0.701831	0.687698	0.680873	0.708457	0.718868	0.700996	0.703179	0.69729	0.709673	0.70856	0.711033
0.888079	0.883386	0.924566	0.893651	0.907183	0.886371	0.899571	0.844885	0.83808	0.834177	0.807863	0.83232	0.84331	0.85061	0.843678	0.852697	0.851975	0.847551	0.828226	0.86782	0.84195	0.92054	0.900886	0.891314	0.925849	0.930846	0.944493	0.945713	0.950605	0.930686	0.929694	0.946796	0.980958	0.999568	0.972872	0.947108	0.964133	0.967148	0.97107	0.995713	0.986523	0.998115	0.983816	0.992718	0.994712	0.967949	1.01025	1.01255	0.983714	1.02503
0.832741	0.822983	0.761775	0.786444	0.785268	0.79476	0.810156	0.846337	0.811345	0.800341	0.761758	0.826384	0.781916	0.765645	0.756191	0.772072	0.816843	0.81599	0.798158	0.798003	0.776706	0.761918	0.788433	0.817068	0.819273	0.808204	0.876489	0.889597	0.914796	0.877928	0.917553	1.02057	1.02379	1.08626	1.10432	1.12106	1.13832	1.15612	1.19955	1.19412	1.18874	1.31871	1.29621	1.31588	1.33617	1.35708	1.37867	1.42672	1.47825	1.4983
										0.534763	0.500089	0.500858	0.501629	0.502403	0.503178	0.503957	0.504738	0.505521	0.506306	0.507094	0.507907	0.508722	0.50954	0.51036	0.511183	0.512009	0.512837	0.513668	0.514502	0.515338	0.516177	0.517019	0.517864	0.518711	0.519562	0.504663	0.547812	0.573091	0.564585	0.594788	0.629717	0.669004	0.676997	0.687335	0.692965	0.695439	0.715147	0.713647	0.704562
0.864959	0.876283	0.837869	0.856182	0.824899	0.822378	0.859446	0.83151	0.83163	0.812179	0.804948	0.807047	0.828208	0.831456	0.838891	0.860866	0.826702	0.842497	0.836127	0.847283	0.772302	0.743519	0.788216	0.797448	0.765774	0.757464	0.776242	0.736759	0.727326	0.71068	0.786818	0.829217	0.875221	0.875112	0.849911	0.91231	0.972132	1.10368	1.04781	1.11389	1.10084	1.18932	1.16786	1.09855	1.13617	1.12186	1.14176	1.20129	1.15855	1.18771
0.996393	1.04753	0.997697	0.956782	0.955248	0.897978	0.939722	0.857295	0.885684	0.89203	0.949304	0.994135	0.993091	0.962715	0.957853	0.993928	0.947507	0.918406	0.899954	0.920772	0.974814	0.915504	0.93218	0.875109	0.787647	0.852283	0.865021	0.797906	0.835347	0.790203	0.822026	0.866135	0.913163	0.907632	0.986622	0.924896	1.02837	1.06724	1.02312	1.23628	1.35069	1.41591	1.35362	1.33541	1.30359	1.23529	1.39806	1.36359	1.42767	1.48222
0.845387	0.836717	0.841667	0.826464	0.824129	0.818174	0.80449	0.816021	0.811094	0.800993	0.801795	0.806062	0.797007	0.807094	0.816632	0.813456	0.821662	0.825018	0.806535	0.814626	0.825852	0.81593	0.827952	0.820223	0.822912	0.829197	0.823654	0.818185	0.812789	0.81093	0.809079	0.842684	0.860451	0.878079	0.878345	0.89371	0.915505	0.926551	0.981683	0.987396	1.01713	1.06653	1.07882	1.13398	1.18324	1.20025	1.22614	1.25658	1.28223	1.29243
					1.29128	1.50674	1.12305	1.53374	1.13725	1.2464	1.37873	1.47252	1.29262	1.22392	1.4072	1.17954	1.21769	1.13903	1.24499	1.16766	1.4248	1.33715	1.4259	1.24643	1.39947	1.3313	1.23979	1.26318	1.24317	1.25736	1.39196	1.53734	1.47175	1.60165	1.49431	1.64198	1.55493	1.84294	1.6549	1.85352	1.74884	1.7474	1.74774	1.7709	1.7167	1.90004	1.91545	1.91784	1.72519
0.687568	0.651736	0.671059	0.706002	0.703331	0.67216	0.656237	0.686543	0.720145	0.722497	0.70668	0.726698	0.730016	0.740482	0.703061	0.682518	0.687849	0.719562	0.718783	0.713756	0.699635	0.696742	0.704354	0.703617	0.699592	0.680687	0.694371	0.680265	0.700816	0.703384	0.691065	0.716688	0.744806	0.752517	0.784846	0.790215	0.824009	0.825952	0.898796	0.883681	0.90933	0.900081	0.919748	0.90841	0.945438	0.954607	0.946332	0.966863	0.940026	0.933727
0.999584	0.990342	0.978584	0.980641	0.981395	0.963896	0.961873	0.967162	0.950891	0.946795	0.950773	0.969065	0.972113	0.96504	0.946429	0.949149	0.929326	0.934469	0.937222	0.930808	0.916747	0.915802	0.906222	0.917291	0.895435	0.901331	0.900844	0.890171	0.909611	0.896081	0.880386	0.910273	0.928448	0.93207	0.930146	0.953711	0.993677	1.00287	1.04025	1.04029	1.05037	1.06289	1.06723	1.0553	1.05494	1.05042	1.05115	1.05054	1.09201	1.05169
0.61508	0.6346	0.648866	0.687404	0.629006	0.675143	0.691635	0.714593	0.699108	0.69695	0.726119	0.71337	0.66618	0.659054	0.641701	0.661505	0.619119	0.639172	0.641799	0.655082	0.623308	0.642124	0.621624	0.674517	0.661144	0.667223	0.644197	0.645701	0.613874	0.648074	0.674696	0.657548	0.703635	0.68866	0.718061	0.742839	0.793058	0.774518	0.824534	0.845497	0.84596	0.863776	0.890779	0.919717	0.957341	0.940419	0.950612	0.986345	1.00727	0.989183
1.52539	1.44384	1.51166	1.53324	1.44157	1.39954	1.4614	1.50821	1.47525	1.40336	1.46534	1.45648	1.67166	1.52588	1.55175	1.41598	1.53514	1.64391	1.66366	1.96481	1.98437	2.0676	2.18575	2.12699	2.25052	2.56861	2.51596	2.88809	2.19883	2.33617	2.26339	2.31217	2.17428	2.16326	2.21605	2.47292	2.21472	2.01642	1.71462	1.74631	1.52457	1.56677	1.39926	1.54567	1.59065	1.69803	1.66075	1.90176	2.00092	2.02517
0.68749	0.70164	0.710183	0.703229	0.701126	0.725241	0.713549	0.72555	0.715191	0.693525	0.712925	0.705074	0.702195	0.712471	0.698979	0.697173	0.69356	0.699598	0.67735	0.681391	0.689571	0.710649	0.681996	0.704468	0.689542	0.689859	0.686226	0.67828	0.679534	0.675633	0.689054	0.703771	0.682637	0.699283	0.727063	0.768063	0.807141	0.874313	0.882037	0.930481	0.956151	1.02345	1.00996	1.03295	1.07712	1.12416	1.11991	1.13022	1.14186	1.20494
1.00725	0.990719	1.01913	0.975127	0.989282	1.00465	0.990404	0.991071	0.96384	0.969487	0.944601	0.938299	0.921649	0.962508	0.942838	0.985538	0.999018	0.985341	0.986661	0.983017	0.961479	0.966895	0.9863	0.979365	0.965518	1.00363	1.00631	1.03686	1.04957	1.03866	1.04259	1.13655	1.22288	1.20105	1.20293	1.20063	1.22976	1.22622	1.21772	1.26698	1.30184	1.29385	1.30559	1.27526	1.31013	1.33397	1.35114	1.35888	1.3166	1.27263
																															0.506707	0.56638	0.586352	0.598819	0.591599	0.598952	0.621111	0.636671	0.639018	0.670615	0.666783	0.688276	0.707018	0.724513	0.720942	0.73297	0.700267	0.731177	0.749206
1.19715	1.18701	1.17498	1.04384	1.05904	1.03692	1.0945	1.04942	1.03948	1.05211	1.0295	1.08935	1.09385	1.11845	1.08226	1.0323	1.05715	1.06551	1.00432	1.03054	0.980129	1.01964	1.04102	1.0656	1.02805	1.06149	1.02175	1.0722	1.09898	1.12714	1.14077	1.1511	1.2341	1.3484	1.31344	1.26767	1.15217	1.35038	1.27497	1.25537	1.46536	1.49273	1.33557	1.49739	1.41405	1.53855	1.54092	1.4527	1.49828	1.497
0.86503	0.839359	0.833865	0.839815	0.817743	0.826073	0.815946	0.816871	0.816449	0.841672	0.801602	0.77488	0.784624	0.773956	0.786502	0.747348	0.759235	0.761587	0.742928	0.75154	0.750161	0.766421	0.760337	0.755783	0.760784	0.78241	0.776831	0.769258	0.748584	0.757747	0.775433	0.758603	0.755512	0.774721	0.842023	0.82248	0.873763	0.914811	0.915703	0.958069	0.975566	1.01322	1.01447	1.05555	1.08345	1.0942	1.15347	1.13949	1.18883	1.20318
0.519133	0.516435	0.527068	0.513646	0.519678	0.529824	0.522097	0.514592	0.515833	0.513836	0.513618	0.525097	0.50155	0.504603	0.521354	0.522525	0.527837	0.555705	0.542099	0.521912	0.517491	0.513144	0.510425	0.505958	0.506504	0.511134	0.51585	0.526078	0.51083	0.500106	0.507148	0.534878	0.541171	0.506688	0.520101	0.51726	0.51445	0.536701	0.553006	0.538974	0.544108	0.562795	0.570028	0.568643	0.567713	0.555492	0.537974	0.550814	0.567226	0.56138
0.693571	0.680047	0.706915	0.667553	0.668689	0.650412	0.657031	0.698207	0.664429	0.654028	0.680401	0.673117	0.649559	0.679798	0.689155	0.687427	0.670703	0.698419	0.711416	0.690198	0.695013	0.683975	0.699829	0.686656	0.716456	0.699622	0.7091	0.69034	0.728361	0.696603	0.68952	0.723436	0.712862	0.714227	0.719757	0.736544	0.770104	0.805991	0.85004	0.860114	0.900949	0.914482	0.959499	0.981934	1.02649	1.06331	1.11068	1.10675	1.07989	1.11669
11.7193	11.5698	11.2766	11.7309	11.9002	11.3026	11.3769	11.1074	11.141	11.712	11.2064	9.49935	11.4024	11.3131	11.6417	11.5758	11.2965	10.5458	11.6184	11.8004	11.0288	11.4194	11.3647	10.8727	11.299	11.2843	10.8356	11.3978	11.8315	10.9942	10.7172	10.4048	11.0901	11.137	11.0636	11.5549	12.1846	11.7361	11.8621	12.6085	12.3954	12.0332	11.9604	12.1955	12.2828	12.2264	12.1576	11.9852	12.2284	11.8279
0.533634	0.539712	0.53267	0.536235	0.536783	0.52875	0.516201	0.515775	0.520781	0.515892	0.517152	0.512596	0.504203	0.501803	0.509836	0.508801	0.517203	0.50686	0.519393	0.510628	0.522261	0.510088	0.516163	0.519376	0.514809	0.522161	0.523025	0.527055	0.543004	0.554407	0.545557	0.567483	0.586095	0.587614	0.597551	0.611601	0.642677	0.664729	0.660333	0.670829	0.650357	0.678735	0.686941	0.675433	0.685993	0.679077	0.699424	0.678219	0.676881	0.678784
0.733109	0.675686	0.685566	0.671564	0.655061	0.682801	0.68109	0.682027	0.700091	0.658319	0.676054	0.648668	0.644294	0.674723	0.683268	0.63536	0.632026	0.665037	0.667829	0.617135	0.651059	0.652243	0.650439	0.648644	0.646859	0.699474	0.705686	0.70351	0.724695	0.65958	0.715849	0.736608	0.698893	0.730669	0.835798	0.81838	0.88734	0.845987	0.965416	0.975711	0.998682	1.04692	1.08385	1.09053	1.11535	1.12622	1.12948	1.15353	1.15433	1.26483
0.745719	0.728363	0.719302	0.727845	0.727647	0.735234	0.732479	0.733359	0.734989	0.743831	0.770706	0.778548	0.770328	0.795263	0.780419	0.773002	0.758879	0.76985	0.78599	0.772869	0.778013	0.788265	0.791083	0.811827	0.818757	0.80137	0.799896	0.799488	0.803555	0.816226	0.862939	0.915132	0.91334	0.916397	0.917975	0.948388	0.954147	0.980591	1.00195	1.02426	1.04759	1.07407	1.08341	1.09291	1.09522	1.09755	1.09988	1.10222	1.11616	1.13046
1.54825	1.514	1.52043	1.50448	1.48993	1.44833	1.48343	1.48395	1.51605	1.46866	1.46029	1.47389	1.47104	1.48878	1.48065	1.43054	1.46149	1.46532	1.41328	1.40748	1.3921	1.36303	1.38818	1.30738	1.33546	1.32037	1.29996	1.2785	1.28217	1.29428	1.29147	1.28151	1.28868	1.3094	1.3558	1.3609	1.39782	1.39409	1.38782	1.4127	1.45024	1.43315	1.43861	1.43863	1.42221	1.45846	1.47211	1.45111	1.47311	1.4949
1.07221	0.947073	0.951283	1.00551	1.00068	0.955187	0.90696	0.930731	1.04554	1.06027	1.06301	1.20228	1.05309	1.02985	1.22796	1.52044	1.65159	1.60114	1.6574	1.64472	1.65299	1.6759	1.79993	1.61486	1.68275	1.658	1.79689	1.8383	1.64317	1.758	1.53297	1.60816	1.48768	1.50044	1.49627	1.41047	1.47086	1.46113	1.41268	1.34595	1.32239	1.36167	1.28435	1.27782	1.31348	1.34174	1.37658	1.36122	1.40721	1.36634
0.669658	0.666512	0.658168	0.780938	0.767179	0.789321	0.778952	0.787726	0.773956	0.792141	0.787624	0.768303	0.78409	0.77533	0.775237	0.771393	0.775267	0.791734	0.779062	0.786285	0.781063	0.798534	0.81334	0.813339	0.810332	0.807347	0.804384	0.801443	0.798523	0.731389	0.783972	0.844703	0.859893	0.91365	0.937022	0.961622	0.987548	1.01491	1.04383	1.07445	1.10692	1.14142	1.17813	1.12816	1.19607	1.24557	1.22803	1.23749	1.21615	1.19553
0.809694	0.834768	0.855725	0.862737	0.839719	0.84254	0.835376	0.870938	0.860545	0.907415	0.850288	0.888245	0.916112	0.81039	0.761763	0.903645	0.894035	0.894756	0.896804	0.870585	0.872983	0.870453	0.890304	0.886516	0.890261	0.906582	0.919606	0.894653	0.922726	0.894511	0.798889	0.905971	0.940679	0.940644	0.964629	0.965209	0.976238	1.01285	1.0171	1.09973	1.08069	1.14788	1.14675	1.156	1.15356	1.21724	1.18102	1.16601	1.16783	1.14519
1.34148	1.21274	1.35084	1.27219	1.27115	1.36995	1.1006	1.29222	1.17326	1.2658	1.27044	1.33313	1.30892	1.1854	1.21757	1.25153	1.24094	1.27182	1.27819	1.2994	1.2528	1.27315	1.23202	1.24744	1.26324	1.27945	1.29608	1.32437	1.35392	1.38481	1.41715	1.45104	1.48658	1.41418	1.40695	1.54141	1.47507	1.41462	1.43975	1.57671	1.47684	1.37635	1.52199	1.64048	1.66597	1.63743	1.42109	1.49893	1.42472	1.37771
0.683324	0.687274	0.677186	0.677987	0.67406	0.678204	0.685492	0.688154	0.706357	0.70231	0.709083	0.704746	0.703897	0.707066	0.70173	0.69567	0.712809	0.700972	0.710041	0.704379	0.705808	0.713412	0.707701	0.71025	0.709081	0.701065	0.705876	0.702292	0.686636	0.693018	0.66347	0.694838	0.703421	0.705741	0.692459	0.733865	0.734554	0.791911	0.814328	0.81871	0.833518	0.85777	0.872093	0.890196	0.897746	0.908018	0.949672	0.997157	1.00488	1.009
1.13948	1.18855	1.34719	1.4144	1.30262	1.27785	1.2308	1.18709	0.936247	1.11242	0.891013	1.1259	1.14025	1.11078	1.08279	1.05617	1.2699	1.17474	1.02369	1.21173	1.126	1.00233	1.05716	0.873176	1.08133	0.923211	1.0029	0.921266	1.15651	0.939365	0.967811	0.941463	1.07544	0.994716	1.04308	1.18381	1.24184	1.35312	1.29367	1.23801	1.52612	1.27981	1.19276	1.46514	1.37073	1.36452	1.48852	1.43304	1.42493	1.42007
2.76979	2.83628	2.89188	2.90138	2.85943	2.86326	2.78943	2.98551	3.13729	3.16213	3.32425	3.42027	3.43276	3.73661	3.55424	3.99026	2.80289	2.83377	3.93138	3.24852	1.72816	1.17721	1.19903	1.39736	1.26936	1.31205	1.3577	1.40665	1.45926	1.39488	1.33593	1.26093	1.19391	1.15529	1.11909	1.21473	1.15456	1.32797	1.09142	1.28772	1.93735	3.90974	4.42822	5.10524	4.4586	3.95735	3.55742	3.2309	2.95928	2.72979
0.742517	0.720223	0.697048	0.707515	0.726916	0.724109	0.721323	0.691395	0.710366	0.707465	0.704587	0.742428	0.728451	0.720986	0.713673	0.694543	0.706749	0.663724	0.688313	0.662141	0.667758	0.674589	0.681561	0.688015	0.648658	0.633086	0.624775	0.608436	0.639447	0.660511	0.673661	0.661277	0.726239	0.707107	0.716293	0.729698	0.72508	0.729265	0.733499	0.68117	0.743379	0.818693	0.737513	0.69362	0.774907	0.789952	0.773879	0.758448	0.909561	0.760415
0.96068	0.956153	0.985218	0.983479	0.949668	0.988007	0.96543	0.989577	1.03392	0.985584	1.00954	1.06179	0.933943	1.01941	0.972717	1.02452	1.02791	1.02027	1.00704	0.963969	0.958546	0.904478	0.95452	0.954661	0.995805	0.991212	0.961211	1.05219	1.02855	1.07058	1.04425	1.02082	1.07345	1.0985	1.10822	1.0698	1.16265	1.1569	1.23368	1.25502	1.27407	1.19548	1.25136	1.22275	1.23517	1.29246	1.18414	1.27383	1.27941	1.30704
	1.31194	1.31938	1.3269	1.3345	1.34219	1.34998	1.31549	1.33007	1.34497	1.35333	1.28812	1.22889	1.21307	1.33172	1.44023	1.30466	1.45139	1.15062	1.29806	1.27059	1.24426	1.3326	1.25354	1.27031	1.13466	1.20061	1.2747	1.20527	1.21012	1.21501	1.18251	1.24847	1.3	1.35596	1.46355	1.43761	1.50243	1.42387	1.4625	1.5033	1.54643	1.68994	1.82642	1.66475	1.61475	1.71933	1.7524	1.6948	1.75008
0.697053	0.69313	0.704555	0.691572	0.736945	0.696588	0.68895	0.706481	0.744027	0.763318	0.713495	0.805085	0.775156	0.816242	0.817457	0.789837	0.760291	0.76607	0.756177	0.783374	0.783041	0.775881	0.775884	0.772671	0.771598	0.726191	0.701985	0.690001	0.707345	0.697094	0.685723	0.769272	0.850166	0.823775	0.877428	0.890114	0.835497	0.830019	0.841185	0.867286	0.84155	0.844815	0.882072	0.916982	0.922491	0.876972	0.892725	0.867003	0.925581	0.95262
0.906561	0.892721	0.864335	0.880783	0.855624	0.857471	0.866082	0.869052	0.873132	0.919277	0.871489	0.888334	0.905843	0.944396	0.899363	0.916536	0.87528	0.929795	0.905432	0.946529	0.932159	0.930166	0.946655	0.927186	0.924536	0.883324	0.878942	0.887198	0.924961	0.909422	0.95028	0.958673	0.92084	0.9578	0.966894	0.985792	1.00695	1.01914	0.999949	1.01429	1.04083	1.07575	1.05623	1.06911	1.07983	1.10607	1.13787	1.13628	1.14188	1.1395
0.749474	0.733512	0.749464	0.748766	0.755629	0.757039	0.764142	0.730994	0.724695	0.757079	0.755663	0.744462	0.769977	0.745587	0.733282	0.755833	0.771051	0.774784	0.774554	0.783633	0.770922	0.759862	0.768041	0.742941	0.758054	0.757018	0.776632	0.787455	0.761019	0.778528	0.782154	0.848902	0.855903	0.905622	0.997971	1.02084	1.06145	1.0306	1.04149	1.11346	1.09388	1.13188	1.08445	1.0507	1.03592	1.07752	1.06094	1.07686	1.10958	1.09374
0.508326	0.515449	0.505741	0.52871	0.525611	0.522549	0.519522	0.516312	0.513142	0.505224	0.501084	0.513592	0.516711	0.516153	0.515595	0.513783	0.511983	0.510196	0.508422	0.50666	0.504909	0.503171	0.50264	0.502109	0.503387	0.504796	0.506213	0.507637	0.505121	0.50263	0.505998	0.509412	0.512873	0.51638	0.519936	0.523542	0.504409	0.536695	0.560058	0.555101	0.531554	0.547476	0.544584	0.539056	0.558257	0.566171	0.577061	0.588377	0.612414	0.587672
																														0.745619	0.853227	0.871292	0.859789	0.869884	0.892314	0.91394	0.937894	0.98672	1.01709	1.06604	1.08489	1.13465	1.16712	1.17734	1.22612	1.25606	1.25792	1.26114	1.26916
1.0357	1.0986	1.10526	1.05268	1.01644	0.999973	1.04244	1.04225	1.02422	1.06135	1.0553	0.957766	1.01306	1.03045	1.11922	1.07959	1.05205	1.10975	1.17415	1.24647	1.71851	2.49973	1.77487	2.15063	2.51911	1.7477	2.13746	2.40568	2.67465	2.2711	2.44864	2.7917	2.76827	2.7522	2.6542	2.80302	3.0218	2.82738	2.79636	2.76601	2.73631	2.44349	2.89756	2.65505	2.85898	3.98636	2.35011	3.4101	1.85592	1.89719
1.5396	1.48296	1.43034	1.71113	1.58754	1.58472	1.64062	1.86667	1.85211	1.83777	1.6534	1.50265	2.00105	1.98802	1.97517	1.90167	1.84112	1.82579	1.81072	1.93645	1.45407	1.64493	1.89347	2.13142	1.81868	1.84586	1.7566	1.67558	1.94768	1.95984	2.43506	2.46849	2.50285	2.53818	2.57452	2.61192	2.65042	2.58387	2.52058	2.46031	2.40286	2.34804	2.29566	1.58871	1.6853	1.79439	2.16794	1.66604	1.78368	1.67793
0.535131	0.530554	0.532109	0.528221	0.524999	0.541706	0.535709	0.542019	0.530033	0.52911	0.532218	0.527499	0.528246	0.521037	0.524939	0.526429	0.525183	0.524467	0.502208	0.514224	0.515571	0.51826	0.526928	0.524267	0.531408	0.540443	0.538261	0.537373	0.539946	0.549782	0.544221	0.58641	0.574105	0.569782	0.554691	0.57477	0.553788	0.571493	0.578746	0.59908	0.590351	0.559828	0.601213	0.58815	0.570171	0.579287	0.57733	0.597794	0.610558	0.633909
1.25283	1.23151	1.20891	1.22967	1.24216	1.27366	1.23366	1.21	1.21951	1.21782	1.22501	1.18245	1.19213	1.09086	1.17178	1.18461	1.21076	1.17889	1.13658	1.11996	1.12167	1.11752	1.13942	1.13188	1.15005	1.14412	1.12798	1.14705	1.12904	1.04703	1.0733	1.25678	1.51591	1.29739	1.13394	1.10253	1.07301	1.10318	1.19386	1.14326	1.19901	1.20049	1.23257	1.22788	1.24763	1.28562	1.23889	1.24937	1.34601	1.28338
0.961101	1.02198	0.999533	0.954604	0.96873	0.988423	0.992634	0.960784	0.947837	0.935234	0.947238	0.959554	0.989201	0.958584	0.93902	0.920237	0.902192	0.912162	0.922354	0.932777	0.943438	0.945085	0.989413	0.947997	0.942315	0.94118	0.935007	0.985889	0.942835	0.905937	0.910725	0.92842	0.931419	1.28359	2.064	1.97139	1.64798	1.50653	1.7004	1.57213	1.18334	1.27533	1.26489	1.48528	1.34748	1.33263	1.3699	1.3557	1.47144	2.01586
0.609409	0.622879	0.611569	0.596367	0.607371	0.609794	0.604129	0.60446	0.601085	0.603807	0.585056	0.606293	0.596005	0.588673	0.585199	0.586812	0.580092	0.586242	0.570778	0.563638	0.552565	0.555469	0.558818	0.570941	0.558961	0.576996	0.577199	0.567769	0.573065	0.575565	0.571064	0.590903	0.615539	0.604874	0.621136	0.610954	0.627096	0.622919	0.639217	0.641806	0.653373	0.657608	0.642303	0.646756	0.659809	0.660145	0.669744	0.667483	0.671959	0.684753
0.76841	0.782053	0.758695	0.780399	0.767035	0.786479	0.773363	0.777222	0.756076	0.769817	0.786731	0.79704	0.771283	0.776976	0.779804	0.761854	0.781444	0.78519	0.794718	0.797304	0.786578	0.785036	0.78247	0.780674	0.77005	0.769678	0.773633	0.763433	0.760725	0.753506	0.755423	0.784111	0.780324	0.775123	0.786068	0.789493	0.842678	0.849934	0.871577	0.948518	0.929119	0.925431	0.95798	0.991417	0.939654	0.989602	0.987633	1.03508	0.991135	1.00596
1.41679	1.4996	1.48217	1.43806	1.43599	1.41489	1.45232	1.3534	1.45147	1.36329	1.37466	1.34228	1.40911	1.28324	1.28286	1.15397	1.41622	1.4136	1.29486	1.14739	1.3648	1.49194	1.44437	1.46552	1.39183	1.57589	1.48814	1.55193	1.5114	1.47292	1.43143	1.39221	1.35508	1.31987	1.28646	1.25469	1.22445	1.47435	1.85241	1.97813	1.57633	2.04213	1.2239	0.873793	1.09494	1.46595	1.4382	1.45603	1.21711	1.3992
0.855799	0.861204	0.800772	0.800612	0.796017	0.741288	0.719997	0.644635	0.617389	0.587849	0.582884	0.578002	0.591122	0.596213	0.601392	0.606662	0.6032	0.614638	0.596257	0.607667	0.582006	0.593211	0.582668	0.572493	0.600744	0.600053	0.599363	0.599175	0.604751	0.61015	0.63923	0.61672	0.661318	0.653431	0.656314	0.681242	0.685344	0.754752	0.733185	0.764726	0.816593	0.808459	0.833307	0.814169	0.83362	0.839931	0.84999	0.834945	0.830206	0.825363
0.972259	1.00795	1.05988	1.00258	1.02189	1.05716	1.0161	1.10833	1.058	1.08892	1.04812	1.03789	1.0549	1.09699	1.08061	1.03665	1.07251	1.03043	1.03281	1.04017	1.02004	1.10025	1.07991	1.05897	1.02325	1.03357	1.07009	1.03319	1.03353	1.03799	1.03398	1.11936	1.10576	1.12328	1.12114	1.14544	1.19226	1.18981	1.23053	1.22395	1.2633	1.24445	1.27027	1.31229	1.28194	1.24271	1.2314	1.28926	1.24693	1.26671
0.792214	0.791289	0.807787	0.793503	0.779681	0.781722	0.781595	0.775962	0.764758	0.77724	0.778837	0.761637	0.764493	0.791699	0.785402	0.790953	0.775784	0.791573	0.787999	0.785224	0.799455	0.799859	0.797844	0.794884	0.789924	0.803848	0.791776	0.781266	0.781727	0.798349	0.811748	0.796896	0.814828	0.855215	0.851723	0.859321	0.878615	0.904903	0.912384	0.919965	0.9433	0.978918	0.992707	1.02336	1.0508	1.05101	1.0681	1.07686	1.08199	1.13359
1.02881	1.04669	1.04033	1.03405	1.02784	0.98924	0.95343	0.991426	0.972456	0.991212	0.972073	1.00082	0.983995	0.963059	1.01288	0.996539	1.01637	1.00909	1.00845	0.974866	0.998148	0.988127	1.00907	0.979293	1.03598	1.02441	1.00935	1.0332	1.03635	1.02507	1.02305	1.06367	1.06731	1.10261	1.10024	1.12493	1.20134	1.24567	1.32632	1.3557	1.36753	1.44241	1.46384	1.52987	1.50161	1.55178	1.58577	1.61894	1.65658	1.75484
																					0.952105	0.981729	1.01325	0.973883	0.937457	0.903658	0.872211	0.842879	0.815456	0.789761	0.765636	0.848345	0.951089	1.08215	1.2551	1.49385	1.52241	1.55207	1.58291	1.61501	1.64843	1.68326	1.7196	1.58418	1.46853	1.69976	1.82008	1.62325	1.64709
1.39591	1.38017	1.35191	1.33404	1.32602	1.35312	1.39382	1.36197	1.36569	1.36642	1.40043	1.39908	1.37927	1.34906	1.37425	1.3827	1.40512	1.39311	1.42967	1.37269	1.38017	1.41082	1.41916	1.40613	1.39104	1.36393	1.35104	1.3844	1.36689	1.31019	1.36215	1.36025	1.44641	1.35949	1.44457	1.51266	1.52834	1.54983	1.57192	1.65923	1.63134	1.67095	1.72225	1.71542	1.80611	1.86526	1.84156	1.8756	1.88328	1.89617
0.939905	0.928443	0.911255	0.913389	0.923325	0.899959	0.890402	0.90706	0.8891	0.90062	0.853349	0.910504	0.8732	0.890689	0.90348	0.894103	0.864749	0.895518	0.940336	0.888644	0.918294	0.867488	0.926859	0.917712	0.900234	0.878605	0.927458	0.884488	0.884338	0.887623	0.88635	0.938804	0.934714	0.930659	0.92664	0.922655	0.918704	0.914787	0.925453	0.936371	0.953238	0.970724	0.94181	0.914567	0.873855	0.864628	0.855593	0.86924	0.88333	0.878504
2.00869	2.51959	2.39344	2.31856	2.64567	2.26837	2.80604	2.28826	2.43766	2.6915	2.53454	2.30576	2.57359	2.56685	1.80777	2.28015	2.39517	2.56407	2.75465	2.34197	2.74996	2.4188	2.5125	2.62256	2.48413	2.84485	2.55723	2.47706	1.78351	2.29473	1.84294	1.97933	1.88517	1.80612	1.85836	2.20304	1.53976	1.89527	2.46423	2.58435	3.14259	2.59386	3.20458	2.81848	2.94066	3.36759	3.60852	2.4578	2.40532	3.37326
1.80492	1.95641	2.36179	2.22589	2.10479	1.98551	2.00757	2.00223	2.00784	1.98354	2.08121	2.06704	2.15666	2.08411	2.02841	1.96256	1.78943	1.77628	1.84564	1.82679	1.93348	1.88053	1.76277	1.72496	1.84407	1.63091	1.472	1.52275	1.59103	1.58741	1.50954	1.49558	1.41726	1.50481	1.40794	1.4025	1.3623	1.36893	1.39666	1.40877	1.51611	1.40582	1.45396	1.508	1.37491	1.41883	1.53662	1.56296	1.54606	1.5715
1.0517	1.04146	1.35312	1.13094	0.892739	1.1347	1.06941	1.01123	0.959046	0.911987	0.86933	0.830484	0.794962	0.762355	0.732316	0.67095	0.619073	0.614895	0.703718	0.726103	0.749959	0.775436	0.802704	0.831961	0.86343	0.897374	0.836913	1.02396	0.855459	0.842912	1.04834	1.0855	0.86755	0.977426	0.97819	1.07525	1.13152	0.997492	1.08111	1.38256	1.91714	1.77235	2.63707	2.80098	2.66349	2.68316	2.70312	1.75278	1.51105	1.32792
0.827368	0.848374	0.871304	0.8482	0.838481	0.837163	0.839079	0.847489	0.816287	0.79344	0.797126	0.815339	0.817971	0.798057	0.803885	0.819856	0.84165	0.82123	0.832658	0.844408	0.749046	0.823581	0.85387	0.832132	0.817198	0.792074	0.785471	0.781016	0.801216	0.764288	0.789999	0.772804	0.776186	0.794482	0.795805	0.750734	0.796203	0.792829	0.828341	0.8416	0.860364	0.866183	0.896548	0.875885	0.889188	0.905111	0.877744	0.897049	0.9134	0.9841
1.10419	1.04142	1.06859	1.06501	1.02398	1.00281	1.03079	1.0397	1.00278	1.0163	0.99561	0.966227	0.996801	0.98469	0.978661	0.9857	0.973069	0.996337	0.998226	0.965612	0.97126	0.986482	0.962654	0.98951	0.942597	0.961747	0.947054	0.951755	0.934255	0.96737	0.937715	0.998311	0.956238	0.976694	0.992346	1.06056	1.10105	1.09258	1.14599	1.23227	1.22794	1.21296	1.26047	1.27449	1.25333	1.2814	1.29494	1.31508	1.29237	1.27323
0.589292	0.624219	0.688821	0.690918	0.652783	0.708276	0.683008	0.645739	0.612327	0.582203	0.554903	0.53005	0.507327	0.507745	0.508165	0.508585	0.509006	0.583812	0.684396	0.826851	0.768953	0.610094	0.505635	0.598775	0.733976	0.804065	0.845069	0.921396	0.828128	0.69128	0.593246	0.576893	0.583263	0.602738	0.623559	0.747727	0.933643	0.930221	0.819171	0.851263	0.916855	0.881804	0.970679	0.86282	0.944895	0.843689	0.892618	0.855484	1.00409	0.971674
1.61408	1.6083	1.55449	1.62911	1.58393	1.65467	1.53428	1.68746	1.54161	1.62082	1.54872	1.6016	1.6931	1.58019	1.57063	1.70207	1.76353	1.5814	1.62719	1.5707	1.49166	1.56862	1.54582	1.57636	1.71343	1.50179	1.76249	1.61416	1.59395	1.52496	1.67694	1.78125	2.01246	1.83043	1.87725	1.88347	1.83177	1.79594	1.99136	2.00265	2.00323	1.8912	2.17839	2.01039	2.38624	2.12896	2.14361	2.24221	2.24574	2.06102
0.695747	0.666074	0.661023	0.671084	0.681721	0.730486	0.674676	0.667755	0.652769	0.731946	0.688911	0.666729	0.755119	0.733535	0.713214	0.724021	0.74044	0.748136	0.758467	0.785676	0.751045	0.746333	0.782442	0.782761	0.786098	0.788833	0.795611	0.810401	0.80351	0.802994	0.807245	0.788383	0.804389	0.783784	0.818505	0.800597	0.845	0.873716	0.887104	0.953538	0.948534	0.949688	0.99541	1.01729	1.04602	1.08719	1.07422	1.09134	1.11334	1.12824
1.09792	1.09401	1.08508	1.06648	1.08024	1.05951	1.07908	1.06755	1.08524	1.06989	1.08586	1.08614	1.05662	1.07383	1.04936	0.993269	1.05804	1.02962	1.03446	1.0275	1.06118	1.07043	1.05122	1.07261	1.06215	1.07676	1.06368	1.08088	1.08178	1.09265	1.12989	1.1341	1.15693	1.14435	1.20124	1.20188	1.27493	1.3038	1.37172	1.43642	1.48031	1.52512	1.49143	1.55958	1.54881	1.62231	1.61439	1.65959	1.6642	1.67986
0.837551	0.84124	0.841762	0.83604	0.887035	0.860722	0.856833	0.863061	0.791345	0.834988	0.818599	0.76886	0.816061	0.834535	0.82361	0.816796	0.829246	0.799347	0.807079	0.810894	0.775805	0.798005	0.796249	0.779582	0.795788	0.777649	0.792134	0.776737	0.77307	0.767907	0.77727	0.791403	0.812352	0.840446	0.851449	0.861825	0.83783	0.91455	0.919264	0.965987	0.983741	1.0085	1.00361	1.04469	1.08044	1.04643	1.02722	1.05376	0.998362	1.06969
1.64887	1.6823	1.58829	1.5128	1.6128	1.5173	1.58517	1.54042	1.51592	1.47085	1.57361	1.65294	1.56755	1.59028	1.57694	1.47513	1.57468	1.57638	1.5073	1.40999	1.51578	1.54299	1.4695	1.53708	1.4989	1.40114	1.44304	1.38286	1.43381	1.49195	1.41071	1.49728	1.44513	1.41183	1.41704	1.4286	1.45017	1.53371	1.50341	1.51951	1.58362	1.62306	1.54194	1.58659	1.68209	1.64528	1.61922	1.57322	1.63032	1.60957
0.522782	0.545975	0.53947	0.536331	0.532911	0.51384	0.519037	0.504313	0.532731	0.504335	0.521016	0.507611	0.507472	0.507334	0.507195	0.507057	0.506918	0.50678	0.506642	0.510039	0.513482	0.516972	0.52051	0.524097	0.527733	0.503739	0.510163	0.528234	0.506514	0.501808	0.504701	0.514129	0.523916	0.52304	0.537373	0.571754	0.54565	0.548735	0.550963	0.562006	0.568245	0.602498	0.587996	0.606823	0.613019	0.595103	0.632653	0.595796	0.626602	0.618384
1.304	1.33176	1.1364	1.15014	0.972619	1.05587	1.0785	1.04246	1.00684	0.99133	1.03967	1.02353	1.01846	1.07713	0.957947	0.973131	1.19774	1.20777	1.20632	0.964463	1.16964	1.23518	1.18998	1.21212	1.19823	1.21513	1.18716	1.17547	1.25514	0.957682	1.03647	1.32177	1.06836	1.10235	1.11543	1.26881	1.32524	1.32606	1.31304	1.19429	1.41649	1.3868	1.39423	1.41514	1.38145	1.39981	1.4414	1.49062	1.5059	1.54433
1.29253	1.26148	1.33543	1.23675	1.25082	1.20933	1.22768	1.20028	1.16785	1.05876	1.19289	1.13678	1.08571	1.03855	0.87028	1.02816	1.04986	1.00485	1.13104	0.992551	1.08821	1.12052	1.08393	1.02532	1.10207	1.16629	1.03621	1.04791	1.08328	1.06326	1.06417	1.13236	1.17443	1.24673	1.19178	1.17179	1.21491	1.18923	1.20931	1.11424	1.33347	1.26209	1.31669	1.42911	1.24933	1.1809	1.51625	1.32653	1.32547	1.19681
0.703392	0.704807	0.695971	0.701368	0.703946	0.693245	0.689075	0.688493	0.683398	0.689871	0.66913	0.672787	0.675237	0.689634	0.664162	0.667216	0.654433	0.674239	0.670453	0.673382	0.667027	0.672763	0.680194	0.673489	0.67293	0.668206	0.676521	0.685776	0.680723	0.698037	0.690089	0.6806	0.710004	0.709887	0.731844	0.78144	0.814359	0.865788	0.864415	0.919499	1.02112	1.06607	1.08233	1.15261	1.16872	1.20003	1.21691	1.21535	1.23832	1.22973
1.11802	1.1412	1.1217	1.09127	1.14639	1.10578	0.948268	0.830033	0.724159	0.642238	0.686314	0.740951	0.805039	0.881264	0.973433	1.08713	0.952035	0.959628	0.967342	1.11225	1.15473	1.06737	0.992302	0.818238	0.696127	0.60573	0.718361	0.882444	0.949152	0.940816	1.06989	1.18693	1.1029	0.959043	0.848383	0.963912	1.11587	0.998877	1.13737	1.08344	1.10304	1.13827	1.1688	1.201	1.23773	1.17865	1.23837	1.26249	1.34189	1.31632
0.648057	0.64428	0.66275	0.65897	0.655283	0.666418	0.670695	0.664725	0.671726	0.645885	0.641446	0.654826	0.648965	0.642169	0.656238	0.654841	0.649832	0.64174	0.636405	0.646061	0.641087	0.640719	0.63985	0.641093	0.640925	0.645481	0.648834	0.651477	0.661545	0.655345	0.653364	0.654563	0.65286	0.655878	0.676066	0.706134	0.737569	0.761594	0.803441	0.825513	0.837163	0.867163	0.915876	0.92567	0.927046	0.959567	1.02223	0.98159	1.01251	1.04714
0.904445	0.861344	0.714179	0.765164	0.74032	0.739511	0.721383	0.783418	0.857126	0.924821	0.87711	0.810781	0.753779	0.756045	0.881788	0.782276	0.805519	0.871841	0.883957	0.79606	0.815692	0.780136	0.756602	0.810687	0.773548	0.778646	0.781871	0.736081	0.756524	0.767076	0.740238	0.734388	0.739121	0.740027	0.744778	0.790337	0.769575	0.830336	0.824807	0.809527	0.809878	0.865573	0.890601	0.834003	0.840365	0.849006	0.886045	0.841077	0.837408	0.868713
0.951348	1.03489	1.14279	0.949509	1.0243	1.035	0.960274	1.08829	0.939571	0.950157	0.947878	0.897968	1.00493	0.958808	0.992263	1.03796	1.13847	0.969691	1.02631	1.1711	1.23172	1.30326	1.09326	1.39999	1.18138	1.02182	1.20799	0.9538	1.03639	0.936509	0.915264	1.00252	1.10816	1.06556	1.09578	1.08922	1.11207	1.09376	1.1057	1.09487	1.21845	1.08898	1.16714	1.15822	1.24903	1.22496	1.21722	1.20179	1.28605	1.28669
0.744417	0.727585	0.726057	0.752428	0.762505	0.754307	0.774387	0.774847	0.737152	0.771392	0.759318	0.715635	0.756685	0.73167	0.733092	0.737924	0.76282	0.723782	0.732134	0.695349	0.732299	0.752203	0.696589	0.695301	0.731665	0.69355	0.7028	0.69262	0.685042	0.74422	0.675671	0.700148	0.719347	0.753133	0.725629	0.763572	0.845237	0.800596	0.822087	0.910702	0.806101	0.890144	0.929915	0.904892	0.939319	0.923216	0.921971	0.942926	0.979358	0.953894
0.884086	0.878526	0.901167	0.878956	0.87366	0.874004	0.874348	0.840873	0.856468	0.824622	0.812095	0.796073	0.74448	0.788083	0.759946	0.751541	0.772857	0.763247	0.789131	0.755659	0.754248	0.745289	0.772081	0.736688	0.746162	0.732756	0.733877	0.75607	0.725324	0.69698	0.703161	0.747405	0.766958	0.791745	0.782009	0.78606	0.774286	0.769589	0.77655	0.783639	0.790859	0.828298	0.842782	0.841458	0.858241	0.828624	0.860242	0.872135	0.861084	0.874272
0.552683	0.586769	0.569685	0.553568	0.56226	0.571229	0.58049	0.590055	0.599941	0.581146	0.563493	0.54688	0.531219	0.568984	0.570712	0.57245	0.522351	0.545482	0.544268	0.543508	0.527306	0.523967	0.530893	0.538006	0.545311	0.552818	0.541957	0.5548	0.568267	0.569825	0.548198	0.544416	0.532127	0.545101	0.545464	0.564049	0.562343	0.560647	0.558961	0.557286	0.583856	0.559359	0.549831	0.568028	0.591358	0.590845	0.58195	0.622344	0.627136	0.606168
1.41881	1.25844	1.40061	1.37885	1.17188	0.953307	0.803449	0.694306	0.611269	0.804684	1.17716	1.18458	1.1921	1.23029	1.02703	0.881406	0.771951	0.686678	0.61837	0.694796	0.720843	0.74892	0.779272	0.758406	0.738629	0.719856	0.847776	1.03098	1.3152	1.24655	1.26251	1.27889	1.2957	1.16782	0.909501	1.01935	0.955055	0.898387	0.848067	1.04772	1.00944	0.955679	0.933437	0.97206	1.01695	1.01592	1.0684	1.23703	1.15449	1.17713
0.729245	0.830362	0.739034	0.80554	0.795261	0.80692	0.82298	0.735474	0.84186	0.747423	0.822586	0.830727	0.847144	0.704483	0.839359	0.811063	0.745927	0.797515	0.855797	0.862915	0.913629	0.929443	0.926718	0.954313	0.99585	1.07021	1.18218	1.31925	1.45215	1.66819	1.43504	0.979741	0.743766	0.747932	0.838169	0.83661	0.820554	0.813645	0.836829	0.81327	0.77206	0.783757	0.765239	0.753699	0.73597	0.746668	0.755561	0.711752	0.721658	0.731843
0.752162	0.747199	0.725401	0.721844	0.717182	0.71146	0.70859	0.691712	0.712344	0.711663	0.710984	0.699706	0.688781	0.70281	0.690004	0.71856	0.708833	0.709141	0.709449	0.68915	0.683217	0.701847	0.686132	0.703827	0.722458	0.722024	0.707899	0.707048	0.720459	0.717137	0.726528	0.752377	0.76944	0.769396	0.747807	0.759018	0.774252	0.772971	0.804226	0.797953	0.789074	0.787973	0.827725	0.805026	0.860637	0.840015	0.840578	0.905911	0.828837	0.895918
0.901157	0.888053	0.897205	0.912562	0.852914	0.894873	0.894022	0.888835	0.902636	0.893695	0.904613	0.890627	0.871139	0.864909	0.890725	0.832168	0.859448	0.878959	0.860992	0.881322	0.833779	0.791103	0.836542	0.870594	0.876915	0.865162	0.868789	0.831226	0.886697	0.814983	0.860633	0.834305	0.89858	0.913687	0.917478	0.91582	0.979422	1.00471	1.04654	1.06391	1.1129	1.09636	1.14318	1.16936	1.18473	1.17652	1.19146	1.16425	1.20864	1.18685
1.15636	1.15224	1.13902	1.1519	1.16535	1.15019	1.18335	1.19406	1.17733	1.1852	1.14928	1.17663	1.14947	1.14994	1.14983	1.19472	1.16915	1.14465	1.13957	1.17713	1.12898	1.14699	1.17026	1.14953	1.12952	1.13224	1.09821	1.16323	1.10964	1.11291	1.02426	1.15482	1.15369	1.21193	1.22342	1.18607	1.27291	1.31308	1.33918	1.43706	1.42953	1.41655	1.45116	1.51363	1.51785	1.51844	1.53931	1.54469	1.5412	1.52412
0.865025	0.845136	0.853942	0.882145	0.867834	0.871266	0.846882	0.855028	0.867873	0.887939	0.846231	0.835838	0.827558	0.814989	0.812807	0.79823	0.768227	0.775981	0.77645	0.76483	0.76752	0.77055	0.765936	0.770322	0.755351	0.760318	0.759421	0.735337	0.739652	0.733059	0.714951	0.771016	0.75804	0.75343	0.770708	0.799116	0.824083	0.840879	0.866054	0.909217	0.935517	0.911015	0.945333	0.933188	0.956374	0.9478	0.950304	0.917678	0.940577	0.960223
0.749287	0.750144	0.742596	0.708994	0.737588	0.733059	0.72841	0.715566	0.707374	0.735336	0.738581	0.752936	0.710678	0.730596	0.732206	0.696235	0.71995	0.758492	0.702926	0.694606	0.710386	0.720765	0.713648	0.739679	0.765186	0.741342	0.776489	0.744053	0.735102	0.726363	0.71783	0.775421	0.781682	0.788045	0.794513	0.835767	0.833568	0.86898	0.871104	0.906393	0.89269	0.930311	0.90813	0.932851	0.971781	0.953569	0.945433	0.96601	0.952242	0.94393
0.946858	0.841541	0.972786	0.803618	0.843623	0.871486	0.845514	0.857724	0.955265	0.984836	0.937592	0.948309	0.931929	0.94222	0.955762	0.956921	0.935357	0.954261	0.877053	0.838598	0.943843	0.879457	0.85716	0.860749	0.856351	0.887671	0.92137	0.957728	0.93365	0.910754	0.888954	0.868173	0.848341	0.841398	0.913275	0.841191	0.892415	0.900728	0.909198	0.917828	0.926624	1.05492	1.03197	1.00999	0.988933	0.968735	0.977365	0.979276	0.982487	1.0476
0.639546	0.639413	0.607304	0.62728	0.618464	0.606055	0.582718	0.570117	0.579308	0.582384	0.564184	0.56646	0.536924	0.57637	0.550629	0.529885	0.556307	0.545038	0.541734	0.543902	0.554888	0.533401	0.531934	0.533906	0.536422	0.568883	0.546281	0.544413	0.556203	0.551636	0.566144	0.577376	0.61326	0.64752	0.639596	0.68635	0.70538	0.761564	0.764094	0.766642	0.817299	0.879777	0.847865	0.818187	0.875784	0.857356	0.880512	0.832796	0.815551	0.828692
2.35823	2.19283	2.16691	2.01491	2.24623	1.74385	1.59908	1.90079	1.68886	1.63885	1.87475	1.94492	2.0397	2.08896	2.05761	2.13119	2.0624	2.09652	1.90815	1.94599	1.98343	1.97631	2.07928	1.51141	1.70956	1.9675	1.73595	1.88413	2.05996	1.7623	1.64223	1.80175	1.94409	2.05769	2.07931	2.13231	2.14659	2.32545	1.96134	2.34599	2.65413	2.64624	2.74417	2.68671	2.9002	2.5562	2.92408	2.83133	3.02487	3.10593
2.03528	2.0962	1.95659	2.32509	2.25546	2.15804	2.6964	2.91094	2.53728	2.53403	2.36797	2.46963	2.45457	2.15398	2.60994	2.31379	2.11679	2.3198	2.31055	2.03759	2.39977	2.43962	2.17406	2.17683	2.15847	1.96847	1.90727	1.90665	1.9697	2.67563	1.76164	2.20432	2.05769	2.12706	2.23682	1.80536	1.8004	1.56675	1.937	1.87615	1.67724	1.94138	1.97678	2.08291	2.07376	2.15017	2.67849	2.05408	2.28843	2.28323
0.954303	0.920469	0.900174	0.89922	0.871	0.886534	0.876325	0.858521	0.84239	0.797637	0.771385	0.750539	0.735236	0.730902	0.737197	0.710458	0.714151	0.711145	0.669283	0.695528	0.705679	0.683991	0.658937	0.609188	0.61398	0.639754	0.661143	0.666847	0.613658	0.661078	0.610795	0.652659	0.662156	0.641287	0.726076	0.691025	0.685476	0.74187	0.730514	0.79622	0.835411	0.844177	0.870397	0.901411	0.924189	0.931813	0.967575	0.990748	0.994249	1.02765
1.85857	1.98576	1.58839	2.24038	2.4675	1.81517	1.58699	1.8568	1.86564	1.78285	1.85572	1.63192	1.83579	1.78119	1.68464	1.68295	2.32354	2.45266	1.90118	2.1092	1.91589	1.52676	1.83688	1.77829	1.61817	1.76462	1.76927	1.5208	1.71783	1.74509	1.50141	1.25786	1.54802	2.01218	2.30144	2.16919	2.11581	1.86352	2.1348	1.74597	2.39562	1.63978	1.76612	1.72972	1.55009	1.40427	1.28352	1.81806	1.46683	1.22934
0.692406	0.663901	0.646076	0.649271	0.638483	0.683647	0.645698	0.60632	0.615406	0.689673	0.724418	0.666774	0.686477	0.689117	0.692053	0.679246	0.670852	0.658335	0.639577	0.672078	0.658762	0.694041	0.650068	0.664016	0.675856	0.73348	0.690822	0.674622	0.692642	0.748171	0.717125	0.726949	0.791797	0.77197	0.729013	0.800738	0.804399	0.833133	0.863996	0.868854	0.832127	0.901669	0.862655	0.935898	0.934932	1.10019	1.10621	1.04018	1.16804	1.1723
0.580706	0.570647	0.567604	0.585281	0.582738	0.580217	0.583715	0.587255	0.590839	0.574341	0.57879	0.583308	0.585737	0.566472	0.587082	0.585179	0.566074	0.573111	0.580326	0.580729	0.564885	0.549883	0.5548	0.559805	0.552707	0.570523	0.560308	0.564979	0.577207	0.574927	0.553253	0.568705	0.585044	0.604255	0.625675	0.618584	0.620091	0.612841	0.638679	0.635463	0.651125	0.666917	0.682307	0.683691	0.685081	0.689881	0.680278	0.670938	0.735672	0.701814
0.873274	0.890142	0.915845	0.876697	0.899664	0.885125	0.914442	0.891416	0.886888	0.88261	0.888686	0.889663	0.954247	0.880991	0.966332	0.940411	0.960324	0.930285	0.963117	0.952192	0.969423	0.94693	0.892695	0.935436	0.901009	0.902396	0.899751	0.878263	0.887517	0.888103	0.883413	0.898445	0.886434	0.886093	0.87689	0.883854	0.879054	0.872084	0.873735	0.889324	0.88301	0.886172	0.862198	0.874762	0.902269	0.959324	0.952707	0.972727	0.966657	0.992083
0.617943	0.648321	0.626247	0.647416	0.623439	0.607581	0.605454	0.598964	0.592612	0.626359	0.635836	0.59305	0.605066	0.63127	0.620699	0.595667	0.6322	0.616732	0.592249	0.585079	0.561152	0.592116	0.558217	0.582148	0.556132	0.536498	0.512553	0.518493	0.57253	0.56006	0.548123	0.536683	0.501193	0.523953	0.53539	0.520259	0.533106	0.546604	0.559224	0.573649	0.556733	0.611695	0.627606	0.678902	0.669031	0.689644	0.706425	0.724043	0.725997	0.739908
0.99852	1.00654	1.01245	1.01037	1.01474	1.033	1.04016	1.03709	1.05582	1.05136	1.05041	1.06525	1.02146	1.05637	1.0539	1.04793	1.04169	1.03666	1.03487	1.03897	1.04313	1.01012	1.03309	1.02845	1.0317	1.01759	1.02218	1.01891	0.941019	1.01057	0.999116	0.975888	0.976534	0.967135	0.980142	0.873706	0.935235	1.00609	0.982194	1.02384	0.904769	1.03049	1.0221	1.02885	1.01882	1.02255	1.04695	1.01474	0.979425	1.01372
0.536845	0.536479	0.536113	0.559288	0.554546	0.550015	0.545557	0.546469	0.560046	0.506419	0.55811	0.501402	0.521888	0.501897	0.518079	0.53534	0.576014	0.514015	0.520818	0.577988	0.567725	0.525111	0.524565	0.52402	0.523627	0.523235	0.522843	0.522452	0.522062	0.521672	0.59373	0.648272	0.651205	0.669183	0.61178	0.605498	0.638148	0.673135	0.61525	0.620392	0.543111	0.616596	0.631621	0.667304	0.695533	0.726256	0.750826	0.75797	0.765251	0.772674
0.768344	0.765591	0.750724	0.748031	0.745357	0.742702	0.747005	0.757674	0.743447	0.738334	0.717211	0.738661	0.720107	0.724156	0.727018	0.694646	0.698191	0.701772	0.7011	0.707775	0.711037	0.714329	0.704802	0.695525	0.726303	0.726746	0.725442	0.724058	0.716476	0.709051	0.701779	0.714763	0.728237	0.725659	0.733811	0.735491	0.731381	0.727047	0.75723	0.749693	0.73842	0.710642	0.673439	0.701261	0.688988	0.687057	0.707989	0.672986	0.69196	0.685586
1.11386	1.1062	1.13293	1.12391	1.08587	1.14964	1.17704	1.1379	1.08616	1.09115	1.11776	1.17604	1.06651	1.10855	1.18735	1.14993	1.16271	1.18664	1.17847	1.16785	1.21715	1.18451	1.20525	1.16942	1.19599	1.17937	1.13193	1.19407	1.14739	1.17334	1.06911	1.11693	1.14146	1.1604	1.16458	1.18037	1.24956	1.1923	1.29198	1.29738	1.35081	1.29835	1.31932	1.35091	1.34498	1.42973	1.47507	1.44102	1.4918	1.48837
0.882486	0.928176	0.939581	0.915854	0.935334	0.931258	0.908218	1.01686	0.936183	0.899462	0.942498	0.948709	0.938109	0.9119	0.887116	0.867653	0.849026	0.840529	0.813835	0.875024	0.846089	0.819007	0.751262	0.809456	0.795208	0.808548	0.822343	0.834495	0.740511	0.784384	0.765821	0.842769	0.871906	0.903129	0.936672	0.920473	0.867783	0.820799	0.792094	0.804507	0.793782	0.78334	0.773169	0.763259	0.753599	0.760203	0.766923	0.773763	0.780726	0.825412
1.05154	1.07136	1.0295	1.00074	0.971833	0.987803	0.96161	0.949055	0.931417	0.938317	1.00137	0.947982	0.957264	0.893877	0.939577	0.961874	1.04126	1.01944	1.04234	1.02957	1.02963	1.02344	1.02322	1.00037	0.998441	1.01791	0.990386	0.975093	1.00782	1.02093	1.03437	0.994564	1.00278	1.01114	1.03694	1.0641	1.09272	1.12292	1.15484	1.18863	1.22996	1.27426	1.30303	1.33314	1.36466	1.39772	1.43019	1.44316	1.42821	1.4341
0.695661	0.676409	0.685235	0.67879	0.677397	0.685098	0.654346	0.629868	0.683242	0.687056	0.698968	0.696108	0.688908	0.693094	0.69083	0.711527	0.703128	0.735473	0.737129	0.714008	0.747889	0.695069	0.686754	0.678636	0.676725	0.67323	0.705147	0.683071	0.662335	0.683863	0.633027	0.726995	0.688894	0.758205	0.808404	0.830695	0.83947	0.835228	0.835423	0.803332	0.869318	0.843006	0.905641	0.890506	0.943811	0.907048	0.90484	0.919266	1.01007	0.957556
	0.814275	0.817601	0.820955	0.824336	0.771569	0.760756	0.746919	0.737134	0.739477	0.712655	0.703659	0.712969	0.726526	0.72481	0.72916	0.733741	0.748509	0.757809	0.716387	0.735743	0.756212	0.725241	0.686613	0.801325	0.76137	0.768331	0.775421	0.779517	0.755721	0.728474	0.847889	0.837559	0.827478	0.840353	0.888954	0.870987	0.905282	0.928691	0.951119	0.97431	0.99323	1.04541	1.08823	1.10796	1.04013	0.977039	1.05256	1.14074	1.09801
	0.7121	0.705246	0.711966	0.7133	0.720758	0.704249	0.708428	0.711052	0.71456	0.692061	0.692945	0.669583	0.734549	0.700505	0.686974	0.689912	0.685217	0.722838	0.693935	0.69214	0.688005	0.721547	0.734249	0.681167	0.702941	0.690418	0.697642	0.682178	0.693139	0.669913	0.658229	0.681558	0.684364	0.692253	0.67253	0.70899	0.747895	0.774192	0.825406	0.822509	0.858261	0.874379	0.889236	0.921561	0.973341	0.960832	0.986103	0.968093	1.00626
	0.871592	0.846519	0.838169	0.861678	0.850596	0.839796	0.829267	0.775608	0.752157	0.730082	0.733414	0.729252	0.725138	0.721069	0.746898	0.774645	0.804533	0.802638	0.729976	0.762828	0.798776	0.74383	0.695957	0.778551	0.733534	0.693438	0.657498	0.706202	0.650447	0.665058	0.72491	0.7966	0.767654	0.731894	0.699317	0.669517	0.794724	0.787346	0.780104	0.689178	0.7924	0.73403	0.765255	0.799254	0.836416	0.867841	0.741338	0.837424	0.821799
	1.5341	1.54779	1.56172	1.5759	1.59034	1.60505	1.62004	1.67781	1.65161	1.62622	1.6016	1.57772	1.55453	1.53202	1.51015	1.52977	1.5499	1.57057	1.5918	1.59167	1.59155	1.59142	1.57742	1.56367	1.55015	1.53687	1.6215	1.71794	1.78113	1.67557	1.74781	1.82656	1.71437	1.69728	1.69246	1.68766	1.79724	1.82614	1.67863	1.85289	1.78242	1.80679	1.80837	1.80996	1.78477	1.76027	1.76801	1.77581	1.78001
		0.785122	0.874417	0.927454	0.875442	0.851546	0.83307	0.963141	0.971601	0.831905	0.893309	0.964501	0.884063	0.942004	0.937604	0.92437	0.869487	0.913691	0.925955	0.945934	1.00496	0.971573	0.957272	0.943387	0.929898	0.91679	0.904046	0.891651	0.879592	0.900299	0.922004	0.944782	0.968713	0.993763	1.02014	1.04796	1.07734	1.10841	1.1206	1.13306	1.1458	1.15883	1.14215	1.12595	1.1102	1.16124	1.16592	1.12576	1.08828
		0.668995	0.659414	0.650103	0.687552	0.649295	0.643793	0.615487	0.612583	0.609705	0.649935	0.602389	0.637336	0.629186	0.612321	0.616282	0.648599	0.629066	0.615655	0.624105	0.627345	0.610054	0.59369	0.590443	0.630341	0.594972	0.600398	0.586199	0.596389	0.617975	0.641182	0.61899	0.633976	0.616881	0.631349	0.632263	0.653209	0.649946	0.671872	0.661499	0.706907	0.682669	0.660037	0.671363	0.676356	0.691644	0.673434	0.668242	0.666501
		0.795754	0.920595	0.950849	0.983159	0.858304	0.761586	0.684458	0.621516	0.674848	0.738191	0.814658	0.820595	0.82662	0.832734	0.838939	0.845238	0.851631	0.858122	0.864713	0.871406	1.05249	1.00568	0.962858	0.923531	0.887291	0.959981	0.85735	0.882409	0.908977	0.937195	0.860788	0.896306	0.884736	0.809477	0.968345	0.943442	0.929517	0.899849	0.907351	0.905359	0.873582	0.947838	1.06975	0.975004	0.895677	0.911856	0.771963	0.669285
			0.743556	0.788629	0.839519	0.897431	0.963923	0.936072	0.909785	0.884934	0.861405	0.839095	0.817911	0.79777	0.778597	0.804481	0.832145	0.86178	0.893603	0.844688	0.80085	0.761338	0.763485	0.765645	0.767817	0.770001	0.76647	0.772927	0.775273	0.786703	0.797458	0.808511	0.883497	0.900364	0.903449	0.906555	0.973232	0.979249	1.01052	0.968548	0.935124	1.05871	1.05796	1.12252	1.01919	1.09261	1.04321	1.09003	1.03647
																	0.670665	0.670661	0.66936	0.663649	0.655811	0.642229	0.637754	0.633341	0.628988	0.624696	0.620461	0.63642	0.653222	0.670936	0.716067	0.620618	0.547623	0.601672	0.66756	0.693928	0.704743	0.699097	0.740789	0.717587	0.713772	0.709997	0.690548	0.703417	0.701932	0.691162	0.679589	0.662423	0.65459
									0.950973	0.855579	0.89611	0.940671	0.989896	0.966713	0.94459	0.972359	1.00181	0.936594	0.943322	0.957245	1.02577	1.02503	1.05087	1.09572	1.11586	1.0748	1.065	1.01927	0.992754	0.973749	0.909484	0.964619	1.02687	1.00886	0.991477	0.982527	0.900896	1.04854	1.10164	1.17733	1.16259	1.20335	1.24708	1.17273	1.18971	1.22755	1.25923	1.25413	1.29618
																								2.30256	2.60841	2.32305	2.66351	2.69375	2.72468	2.50744	2.32229	2.57432	2.81931	2.58389	2.65002	2.71962	2.20097	2.85652	2.94563	3.04048	2.85841	2.69691	2.55268	2.4231	2.30604	2.4911	2.70845	3.21169	2.94719
																	1.1308	1.10968	1.14009	1.08578	1.07236	1.14642	1.11583	1.08683	1.14614	1.2123	1.28657	1.31202	1.3385	1.36608	1.24076	1.37575	1.5437	1.75837	1.57248	1.42214	1.43368	1.44331	1.39866	1.64397	1.50954	1.39543	1.31456	1.50895	1.58931	1.52246	1.41332	1.47105	1.66068
																	1.11593	1.12416	1.13251	1.14099	1.1496	1.14793	1.14627	1.14461	1.14295	1.1454	1.14786	1.15034	1.15282	1.15531	1.1345	1.11442	1.18553	1.23404	1.16436	1.10212	1.50397	1.14739	1.15674	1.16547	1.15526	1.14522	1.142	1.13249	1.16176	1.17594	1.15469	1.1347	1.18218
																			1.27855	1.26664	1.25494	1.25144	1.24796	1.24449	1.24638	1.19044	1.24097	1.23401	1.22423	1.21461	1.20514	1.19581	1.18725	1.17882	1.17917	1.21158	1.26491	1.29479	1.31915	1.33475	1.36227	1.38467	1.40493	1.41448	1.45793	1.41835	1.45717	1.4298	1.39021
																					0.71297	0.720264	0.727708	0.735308	0.743068	0.750994	0.759091	0.767364	0.756455	0.768533	0.801397	0.824513	0.812923	0.826368	0.812237	0.809558	0.869605	0.916437	0.945168	0.954888	0.979706	1.04519	1.05151	1.10485	1.1107	1.10835	1.06817	1.09222	1.04525
																																												1.03849	1.03828	1.00985	0.982932	0.996432	1.07775
																																							1.07448	1.37419	1.90578	1.40094	1.79774	1.48442	1.56337	1.97698	1.83029	1.76895	1.98245
																												0.57909	0.614368	0.590323	0.568089	0.547469	0.553794	0.542453	0.532334	0.580145	0.569211	0.558814	0.549731	0.583584	0.540456	0.503264	0.513198	0.566287	0.560856	0.516066	0.570566	0.551254	0.532965
																													0.569216	0.569152	0.569087	0.569023	0.568959	0.568895	0.56883	0.621609	0.685184	0.763245	0.782498	0.777493	0.783589	0.772109	0.760961	0.750129	0.832027	0.855492	0.860672	0.865915	0.859382
0.818734	0.8171	0.809095	0.806944	0.796574	0.804855	0.795469	0.808923	0.790959	0.794632	0.780149	0.814684	0.825736	0.809718	0.811468	0.797522	0.829726	0.799439	0.82449	0.798189	0.815188	0.813121	0.787344	0.818521	0.785627	0.795284	0.817674	0.787528	0.79626	0.814072	0.820518	0.838683	0.84726	0.825499	0.788725	0.82959	0.834652	0.870066	0.867441	0.89162	0.911345	0.900643	0.900563	0.935335	0.931896	0.95885	0.935792	0.939811	0.95143	0.924876
0.637437	0.628285	0.645118	0.641408	0.640623	0.652676	0.645496	0.656609	0.654798	0.64523	0.65773	0.670623	0.679392	0.679351	0.682512	0.705724	0.688717	0.702687	0.684169	0.679043	0.683964	0.693258	0.701157	0.690647	0.698448	0.699202	0.698816	0.706164	0.697163	0.705939	0.701156	0.724475	0.723478	0.723137	0.754185	0.780301	0.820401	0.877623	0.892283	0.945755	0.963947	0.978443	1.00549	1.01753	1.03731	1.02237	1.04874	1.06474	1.08073	1.08845
1.2957	1.36294	1.32327	1.63108	1.25077	1.35459	1.28017	1.27533	1.37779	1.35668	1.33239	1.47538	1.58984	1.57144	1.54527	1.53683	1.55878	1.5122	1.41396	1.65098	1.63828	1.60799	1.59633	1.57561	1.60582	1.5168	1.62514	1.58544	1.55161	1.68439	1.66953	1.7364	1.60307	1.39597	1.41376	1.73727	1.77916	1.78471	1.56044	1.6935	1.60363	1.60944	1.67873	1.56397	1.45408	1.46529	1.42804	1.26448	1.339	1.21163
3.17921	2.96476	2.67387	2.71379	3.21457	2.99572	3.00537	3.01546	3.48711	3.65369	2.93045	3.44027	2.98538	2.65345	2.36576	2.64741	2.35316	2.63886	2.6643	2.60022	2.57044	2.81491	3.14413	3.15558	2.92195	3.03216	3.02087	3.42582	2.86501	2.80945	2.98704	3.16796	2.88315	2.93188	2.96755	2.74393	2.83048	2.96211	2.89058	2.63054	2.67888	2.50918	2.3762	2.47437	2.77062	2.58476	3.09427	3.10009	3.00873	3.24322
0.670899	0.669897	0.670333	0.668259	0.679327	0.628031	0.653449	0.665748	0.638518	0.62881	0.641689	0.616108	0.627919	0.630609	0.610505	0.607208	0.592921	0.593696	0.602399	0.605611	0.596463	0.573734	0.580574	0.571536	0.569263	0.57365	0.576421	0.575505	0.570307	0.587069	0.5756	0.575149	0.580287	0.584666	0.594398	0.627914	0.660175	0.690954	0.697478	0.728733	0.73775	0.790192	0.805449	0.816035	0.861544	0.883955	0.919227	0.956968	0.957462	0.965774
0.78565	0.783408	0.837699	0.815273	0.804903	0.846209	0.852322	0.854455	0.885594	0.863739	0.772593	0.828327	0.811352	0.846515	0.791829	0.723051	0.825475	0.831578	0.812388	0.822419	0.828984	0.819011	0.829844	0.817077	0.782176	0.827006	0.793978	0.771486	0.780222	0.776936	0.787998	0.819625	0.861061	0.829614	0.872026	0.830448	0.903265	0.908435	0.967662	0.967996	0.968567	0.976635	0.994544	1.0853	1.04034	1.09172	1.06377	1.0627	1.07995	1.14852
0.710793	0.715705	0.705408	0.686688	0.667635	0.675572	0.678902	0.665313	0.641331	0.67439	0.644771	0.640411	0.624636	0.639988	0.640084	0.632892	0.633116	0.625077	0.637138	0.606649	0.613542	0.636862	0.620358	0.59509	0.595813	0.600133	0.58607	0.574556	0.572357	0.594358	0.570291	0.580156	0.572402	0.593643	0.615474	0.61454	0.654429	0.653844	0.692438	0.73541	0.754353	0.788064	0.783258	0.758853	0.798767	0.804258	0.780305	0.756492	0.817943	0.816404
0.699381	0.682355	0.666906	0.66603	0.681187	0.656722	0.686404	0.684604	0.67078	0.682746	0.660034	0.679866	0.671561	0.686607	0.674581	0.711084	0.727287	0.752192	0.730644	0.763525	0.727358	0.729265	0.708044	0.71805	0.698637	0.681276	0.662586	0.666239	0.675572	0.653664	0.655542	0.653748	0.658961	0.674722	0.675657	0.686775	0.707885	0.747687	0.778425	0.802439	0.852133	0.854375	0.838075	0.846203	0.845892	0.846776	0.857662	0.858618	0.841447	0.852451
0.954693	0.944413	0.907381	0.939672	0.904159	0.906939	0.911803	0.907559	0.909857	0.892433	0.830343	0.858567	0.835323	0.827398	0.855491	0.851752	0.799689	0.822308	0.846977	0.855521	0.824582	0.869342	0.817022	0.834016	0.826458	0.86183	0.811357	0.826007	0.825155	0.830183	0.845599	0.826777	0.857666	0.878628	0.870047	0.877085	0.938025	0.979212	0.955001	1.00633	1.05279	0.99902	1.11758	1.0998	1.06017	1.0257	0.974358	1.0985	1.14617	1.19804
0.904714	0.924198	0.903533	0.941637	0.941933	0.951642	0.933704	0.923058	0.939038	0.921838	0.923918	0.958517	0.911279	0.907027	0.900003	0.889225	0.908493	0.901016	0.905146	0.88457	0.893562	0.889098	0.893204	0.891567	0.879568	0.870065	0.888285	0.880967	0.864964	0.860676	0.872567	0.908309	0.898222	0.902994	0.924121	0.943572	0.950964	0.979773	1.02259	1.04569	1.11831	1.11896	1.14344	1.1836	1.17407	1.19221	1.19148	1.25545	1.28797	1.25763
0.811026	0.821172	0.797423	0.806501	0.803308	0.802945	0.785685	0.786948	0.79488	0.801819	0.815707	0.815327	0.822044	0.801378	0.79869	0.80444	0.791415	0.78715	0.772474	0.796126	0.774969	0.770097	0.758198	0.764363	0.783575	0.770302	0.737763	0.728427	0.740226	0.744148	0.73772	0.721802	0.738499	0.766742	0.707236	0.709794	0.703591	0.770594	0.77526	0.811563	0.788913	0.850721	0.862668	0.897837	0.90849	0.880962	0.829545	0.8607	0.881818	0.910798
1.17427	1.14394	1.15401	1.20196	1.19426	1.23161	1.23913	1.23986	1.25439	1.15075	1.26568	1.2919	1.2776	1.28001	1.20476	1.22545	1.21646	1.15737	1.19347	1.21109	1.25474	1.21804	1.22106	1.22307	1.16222	1.14464	1.10527	1.08892	1.10922	1.06013	1.06511	1.10982	1.04456	1.14522	1.18411	1.18066	1.25703	1.36847	1.46549	1.53293	1.58315	1.57821	1.70449	1.64042	1.68191	1.81792	1.74081	1.78811	1.82679	1.72429
0.86028	0.855944	0.845439	0.802942	0.794706	0.772511	0.769836	0.762755	0.754197	0.73854	0.732491	0.717651	0.727032	0.725889	0.71004	0.716173	0.711182	0.738991	0.725417	0.707797	0.697926	0.675725	0.683508	0.68366	0.685294	0.677408	0.659477	0.647005	0.635797	0.645742	0.667258	0.660725	0.651742	0.65843	0.659544	0.683998	0.690087	0.713183	0.718973	0.703227	0.7367	0.716579	0.751187	0.736578	0.744997	0.751689	0.735258	0.735975	0.732415	0.730221
								0.73216	0.685213	0.643923	0.746208	0.726549	0.729143	0.74888	0.759059	0.687192	0.733945	0.648794	0.744674	0.739074	0.759065	0.75224	0.643653	0.757063	0.70942	0.785758	0.766821	0.751665	0.779885	0.802758	0.777576	0.750312	0.786065	0.806318	0.864296	0.884199	0.900332	0.965937	0.987024	1.03069	1.03324	1.07377	1.08477	1.08639	1.13364	1.15779	1.15956	1.21725	1.14236
0.617354	0.613311	0.604567	0.610205	0.608806	0.61073	0.62226	0.625632	0.611309	0.61724	0.612204	0.620255	0.61224	0.622248	0.611926	0.611718	0.614779	0.612976	0.610798	0.61216	0.599329	0.613131	0.60376	0.599473	0.602919	0.594384	0.605257	0.60421	0.609714	0.615719	0.610523	0.61604	0.623088	0.629668	0.637302	0.668438	0.685376	0.695482	0.705943	0.731426	0.763699	0.773946	0.779239	0.782817	0.808792	0.81853	0.836704	0.852061	0.843786	0.854092
2.56309	2.47566	2.54056	2.52694	2.41323	2.49373	2.39685	2.35431	2.23476	2.19559	2.20294	2.14125	2.20048	2.13507	2.07504	2.00851	2.05501	1.98765	2.00491	2.15833	1.99868	1.99311	2.00602	1.97949	2.01955	2.04396	2.03061	2.02986	2.02604	2.0382	2.11968	2.10106	2.11934	2.13361	2.17112	2.03846	2.08992	2.35233	2.10595	1.9109	2.03842	2.0466	2.14772	2.07452	1.97928	2.10196	2.19652	2.17773	2.12249	2.08555
0.662651	0.647198	0.652241	0.648505	0.645886	0.62784	0.630454	0.619007	0.617545	0.605453	0.602779	0.589664	0.601545	0.599016	0.58282	0.585479	0.582527	0.58433	0.602089	0.589208	0.589593	0.575204	0.578534	0.57051	0.563233	0.581615	0.587722	0.581284	0.563728	0.577783	0.56908	0.593239	0.577256	0.570163	0.563242	0.598361	0.63059	0.640868	0.671752	0.703309	0.711366	0.729844	0.758438	0.772252	0.784354	0.795319	0.781475	0.806076	0.816921	0.820073
0.755145	0.808054	0.82541	0.816247	0.810727	0.79532	0.78686	0.811021	0.774001	0.750933	0.742449	0.74896	0.730723	0.729694	0.707631	0.693218	0.698463	0.725409	0.700988	0.658869	0.685323	0.649656	0.687202	0.676597	0.666314	0.658475	0.65542	0.686111	0.640556	0.712397	0.694039	0.723962	0.710972	0.747173	0.720467	0.734543	0.733755	0.758691	0.789728	0.786678	0.795844	0.810765	0.864633	0.861499	0.826295	0.824406	0.821473	0.836276	0.837384	0.838335
0.688464	0.689216	0.68997	0.678468	0.681899	0.685365	0.675461	0.684892	0.686751	0.68862	0.690499	0.692389	0.694289	0.696199	0.661688	0.660733	0.662564	0.651295	0.646922	0.668655	0.665863	0.688181	0.686682	0.689379	0.698607	0.696805	0.69179	0.717911	0.744661	0.717884	0.705227	0.708824	0.714292	0.721116	0.725877	0.742305	0.753285	0.781378	0.775185	0.768985	0.77169	0.768421	0.769026	0.771916	0.758055	0.786803	0.761184	0.781075	0.779136	0.780039
0.800739	0.814969	0.83295	0.81606	0.835667	0.864854	0.857031	0.846798	0.846518	0.858496	0.829256	0.840885	0.854612	0.846213	0.846552	0.847524	0.840043	0.885607	0.84782	0.847558	0.835128	0.858152	0.845469	0.857093	0.839665	0.868044	0.813305	0.845769	0.84644	0.820797	0.839676	0.853164	0.851207	0.823742	0.817709	0.848857	0.848295	0.877474	0.873648	0.914297	0.88958	0.934227	0.904167	0.924437	0.923715	0.955918	0.946389	0.952323	0.953921	0.914351
0.85246	0.856308	0.83218	0.845467	0.83685	0.833141	0.835172	0.81659	0.812744	0.829511	0.826523	0.820691	0.817006	0.82632	0.815498	0.847437	0.824959	0.848747	0.837081	0.840498	0.840133	0.811507	0.834167	0.82103	0.818587	0.826418	0.832706	0.821113	0.843366	0.849615	0.83965	0.857278	0.876343	0.872885	0.891255	0.924988	0.961798	1.00128	1.01719	1.06597	1.08052	1.10422	1.1217	1.15368	1.15822	1.19383	1.21246	1.24792	1.23412	1.21707
0.959264	0.939883	0.929705	0.939904	0.935529	0.937972	0.928084	0.931639	0.927722	0.931986	0.931637	0.9265	0.935164	0.917087	0.928571	0.89971	0.9459	0.914793	0.920001	0.925279	0.930219	0.935066	0.942199	0.924982	0.902719	0.915398	0.929718	0.902185	0.901495	0.900612	0.884618	0.924809	0.90276	0.904499	0.944231	1.00175	1.06629	1.15272	1.17641	1.25484	1.28066	1.32718	1.36081	1.37188	1.43794	1.39672	1.4495	1.45196	1.43859	1.41478
0.541402	0.555001	0.553529	0.541941	0.549602	0.543104	0.549237	0.536624	0.527186	0.531088	0.523902	0.526611	0.519341	0.519467	0.520628	0.504981	0.51201	0.501837	0.510828	0.512451	0.514085	0.519726	0.526265	0.518592	0.512065	0.5057	0.508101	0.504522	0.504236	0.50395	0.503664	0.503379	0.503094	0.502809	0.502524	0.50224	0.517563	0.522328	0.537026	0.566382	0.572912	0.579628	0.612926	0.622946	0.639975	0.635909	0.64357	0.646967	0.663337	0.672179
1.17083	1.19563	1.19361	1.03564	1.14877	1.14049	1.13232	1.20613	1.00764	1.17651	1.1945	1.18344	1.16514	1.16037	1.12476	1.18233	1.13115	1.15624	1.17207	1.15932	1.18407	1.18025	1.16043	1.22997	1.19827	1.25419	1.18017	1.23151	1.2238	1.20117	1.17935	1.13123	1.22765	1.18737	1.23309	1.27781	1.31933	1.36364	1.49647	1.45594	1.52658	1.45125	1.50282	1.59438	1.52186	1.55704	1.57849	1.63733	1.6969	1.66146
0.975733	0.941412	1.0275	1.02686	0.966288	1.01083	1.05967	0.946155	0.959798	0.97384	0.988342	0.982815	0.99321	1.00383	0.993396	0.98318	0.915767	0.857005	0.80533	0.846905	0.893007	0.944416	0.938296	0.942034	0.945801	0.914925	0.886001	0.87387	0.862066	0.832582	0.842948	0.899108	0.882724	0.857288	0.84962	0.89477	0.916847	0.931252	0.990111	1.04523	1.0292	1.09395	1.0302	1.0994	1.10595	1.13474	1.16508	1.24751	1.26572	1.23061
0.831316	0.833905	0.806376	0.817611	0.834797	0.863586	0.826078	0.82009	0.825818	0.846467	0.822608	0.806603	0.834732	0.803245	0.839433	0.860671	0.857441	0.878033	0.849138	0.896358	0.888441	0.869879	0.879247	0.859715	0.865672	0.880072	0.863493	0.833612	0.853886	0.853993	0.835548	0.843997	0.852619	0.861734	0.86484	0.849977	0.868137	0.898432	0.895597	0.886483	0.903868	0.91804	0.922814	0.961847	0.925825	0.906114	0.933073	0.958035	0.983331	0.952809
0.567386	0.546461	0.577424	0.582574	0.593355	0.594648	0.587049	0.558448	0.591389	0.592972	0.588467	0.58561	0.580781	0.579784	0.578962	0.564746	0.566184	0.563213	0.553546	0.558253	0.563644	0.567969	0.581303	0.579657	0.587179	0.58496	0.582311	0.579686	0.54084	0.585015	0.53847	0.56146	0.579531	0.598804	0.606126	0.620749	0.638657	0.666745	0.67897	0.697409	0.727471	0.721058	0.732102	0.757447	0.75597	0.746369	0.73701	0.725293	0.747806	0.773463
0.560559	0.537323	0.547864	0.535976	0.548995	0.550621	0.563531	0.544782	0.534883	0.543997	0.538867	0.538473	0.544103	0.548704	0.553393	0.564615	0.560123	0.547551	0.544302	0.54115	0.538034	0.554552	0.538922	0.558682	0.549089	0.560832	0.538235	0.546852	0.572128	0.533982	0.54931	0.581677	0.573451	0.594239	0.624907	0.658725	0.66324	0.735626	0.773311	0.810209	0.823502	0.863748	0.863847	0.873582	0.884719	0.885392	0.880468	0.930439	0.929318	0.909839
0.807912	0.850568	0.866131	0.882274	0.763105	0.672298	0.788981	0.832841	0.88885	0.743615	0.768604	0.795331	0.8104	1.00333	0.818917	0.822407	0.870249	0.821073	0.909674	0.81622	0.863305	0.882887	0.850184	1.00009	0.836616	0.816001	0.84112	0.797102	0.829313	0.864237	0.855903	0.945974	1.05723	1.15927	1.10972	1.10907	1.19284	1.28234	1.12215	1.10933	1.0536	1.14429	1.16274	1.33151	1.22801	1.26401	1.28249	1.20883	1.11544	1.13131
0.818393	0.788395	0.809467	0.796723	0.75341	0.759971	0.778838	0.77227	0.753158	0.746038	0.728345	0.723971	0.720904	0.726414	0.726099	0.717817	0.71561	0.720362	0.704951	0.723426	0.731545	0.704551	0.732879	0.719394	0.713441	0.733515	0.721627	0.719558	0.719809	0.728112	0.714086	0.70117	0.70543	0.699688	0.764069	0.802363	0.834817	0.882671	0.911037	0.938641	0.965113	0.961475	0.99802	1.03356	1.03915	1.03319	1.06445	1.04367	1.08574	1.07765
		0.502439	0.516138	0.559543	0.582093	0.550554	0.515059	0.537762	0.557094	0.597202	0.56684	0.549225	0.502086	0.511995	0.522302	0.541637	0.557701	0.535792	0.579024	0.560546	0.543211	0.540998	0.571458	0.552864	0.577497	0.571528	0.545428	0.584054	0.549444	0.5384	0.58768	0.577115	0.597482	0.690461	0.657284	0.62715	0.700454	0.652496	0.615242	0.631873	0.603141	0.585146	0.555369	0.551638	0.556604	0.536303	0.577701	0.595116	0.615332
0.524922	0.515083	0.512269	0.510641	0.503943	0.516304	0.514792	0.515567	0.538029	0.54123	0.537306	0.546175	0.550717	0.556245	0.532208	0.533629	0.542441	0.537371	0.546507	0.540806	0.548272	0.553863	0.54027	0.54093	0.550756	0.549011	0.53651	0.534455	0.545596	0.543938	0.537288	0.548799	0.543956	0.533015	0.538535	0.537226	0.557379	0.560617	0.58116	0.593393	0.588111	0.607855	0.617513	0.628369	0.64358	0.640794	0.634912	0.650173	0.655578	0.638685
1.84565	2.08862	1.91879	2.00644	1.99494	1.7653	2.04437	1.87831	1.90953	1.82906	1.78015	1.79799	1.73821	1.78799	1.80416	1.82665	1.64543	1.90122	1.86827	1.75474	1.88832	1.71495	1.74941	1.62201	1.60754	1.66464	1.64115	1.5661	1.57088	1.58397	1.73321	1.47074	1.5754	1.49767	1.66724	1.66692	1.66726	1.6028	1.80061	1.70259	1.76188	1.72173	1.72076	1.75769	1.76343	1.81346	1.61048	1.85429	2.0435	1.87862
0.880634	0.883087	0.884293	0.899275	0.894801	0.884618	0.880731	0.874767	0.853384	0.851876	0.848042	0.846734	0.866216	0.839868	0.809434	0.811621	0.795822	0.79625	0.785961	0.765174	0.788412	0.784284	0.788009	0.762551	0.769001	0.781377	0.775233	0.790476	0.78618	0.798106	0.810372	0.848301	0.85373	0.908476	0.919085	0.979228	1.01394	1.04943	1.08638	1.09121	1.15642	1.143	1.14817	1.1458	1.18111	1.19076	1.18559	1.2441	1.2522	1.23684
0.813364	0.799505	0.863761	0.826904	0.819103	0.790107	0.881551	0.85965	0.814942	0.828257	0.869303	0.838414	0.838477	0.843383	0.833596	0.801597	0.874881	0.852776	0.825209	0.814013	0.815271	0.836179	0.834462	0.858316	0.862001	0.772174	0.82384	0.748019	0.829859	0.826074	0.822323	0.822103	0.817431	0.828732	0.817212	0.870781	0.899689	0.930582	1.15103	0.991193	1.0236	1.01654	1.05689	1.03931	1.0383	1.01934	1.14998	1.10527	1.15582	1.14688
2.14131	1.79675	1.98104	2.10128	2.29479	2.27266	2.05781	2.19412	2.44588	2.22016	2.17576	2.24802	2.42026	2.48386	2.57609	2.55813	2.41493	2.2111	2.17849	2.29407	2.42261	2.08137	2.27322	2.2294	2.29986	2.28845	2.125	2.37435	2.27993	2.22108	2.35761	2.1645	2.3807	2.10486	2.19369	2.21825	2.49507	1.97487	2.47888	2.476	2.47312	2.24779	2.60561	2.94624	2.81727	3.08769	2.91675	2.77633	2.65587	2.95823
0.725573	0.715638	0.729968	0.708248	0.717948	0.728825	0.748422	0.720019	0.709116	0.735002	0.754813	0.723864	0.84446	0.74281	0.729244	0.714076	0.737003	0.741492	0.753435	0.740926	0.728825	0.728826	0.811103	0.751592	0.75656	0.761593	0.933636	0.835458	0.755963	0.802982	0.79637	0.764731	0.837413	0.850039	0.857901	0.892583	0.922839	1.03887	1.12494	1.03903	1.21351	1.11971	1.1725	1.12241	1.27826	1.2018	1.30918	1.37914	1.28345	1.38887
1.20023	1.31753	1.2467	1.22069	1.24236	1.48026	1.54939	1.66737	1.50587	1.60659	1.60831	1.5268	1.38964	1.57091	1.33652	1.25287	1.27319	1.22945	1.11574	1.17916	1.18098	1.03538	1.01275	1.09522	1.23688	1.15584	1.17732	1.07455	1.22525	1.0696	1.12051	1.12084	1.14832	1.25312	1.17225	1.32149	1.21324	1.20665	1.30958	1.34065	1.26333	1.31588	1.24268	1.17232	1.22017	1.19537	1.08464	0.927666	0.986314	1.00938
0.644436	0.642215	0.63509	0.63397	0.649451	0.640767	0.618986	0.612226	0.625644	0.634588	0.63433	0.617712	0.631102	0.63214	0.614001	0.606542	0.621033	0.615583	0.604524	0.624153	0.609003	0.618929	0.60972	0.614607	0.624069	0.610144	0.605379	0.592002	0.585811	0.591225	0.584365	0.58043	0.576407	0.577825	0.593121	0.589968	0.624475	0.630169	0.646588	0.678201	0.696144	0.710037	0.742561	0.732402	0.735232	0.745841	0.748894	0.745824	0.759246	0.757261
0.585674	0.6018	0.606159	0.576503	0.610385	0.621213	0.569448	0.572318	0.565146	0.556877	0.594689	0.574138	0.545449	0.612517	0.588189	0.597077	0.60104	0.64389	0.604468	0.620286	0.628283	0.622146	0.610562	0.608055	0.605468	0.564754	0.577038	0.579219	0.594735	0.573539	0.575034	0.581707	0.576144	0.576202	0.596056	0.611953	0.543244	0.56875	0.561546	0.558381	0.553511	0.560876	0.550843	0.549868	0.572742	0.562731	0.570973	0.53752	0.548364	0.565208
1.91348	1.8587	1.78835	1.99223	1.82996	2.04444	1.82937	1.81701	1.70907	1.80546	1.67888	1.80441	1.69762	1.67139	1.70441	1.76684	1.57737	1.76455	1.82842	1.64168	1.69957	1.72505	1.77845	1.83291	1.80258	1.77286	1.8359	1.83189	1.79171	1.92565	1.84775	1.87154	1.81405	1.80634	1.87989	1.97165	2.05969	1.78604	1.87552	2.13654	2.28614	2.26852	2.21849	2.29133	2.33757	2.38544	2.32175	2.15729	2.29148	2.3528
																																													0.511847	0.522482	0.516411	0.51048	0.518322
1.20794	1.19322	1.18054	1.19973	1.19043	1.1815	1.17306	1.15972	1.18535	1.17936	1.15997	1.16379	1.15743	1.19216	1.13827	1.15517	1.12024	1.12219	1.1144	1.11784	1.10623	1.0967	1.09469	1.08582	1.07936	1.05519	1.06068	1.06385	1.05252	1.09784	1.06064	1.072	1.04549	1.05979	1.05952	1.08888	1.11369	1.11968	1.10935	1.11691	1.14843	1.18845	1.1846	1.2363	1.25634	1.22539	1.21897	1.23619	1.22833	1.22285
1.02697	1.04797	1.04212	1.03101	1.03812	1.0317	1.0416	1.03676	1.04554	1.0115	1.00846	1.00721	0.997713	0.987764	0.980886	0.965517	0.93957	0.950146	0.951251	0.946303	0.945615	0.939408	0.925183	0.923523	0.957163	0.941133	0.933765	0.923706	0.917762	0.91822	0.887961	0.922463	0.895689	0.893206	0.905636	0.914296	0.932076	0.960144	0.994464	1.06884	1.08197	1.12382	1.11693	1.16097	1.16898	1.16922	1.17073	1.18449	1.19247	1.1863
1.16816	1.1588	1.19138	1.14526	1.16354	1.14981	1.16225	1.09727	1.0669	1.14966	1.11309	1.05506	1.05444	1.15008	1.07424	1.08349	1.04829	1.12038	1.07175	1.03261	1.07996	1.17552	1.04617	1.16123	1.08346	1.09537	1.13325	1.12675	1.13903	1.09038	1.12426	1.16031	1.08498	1.07316	1.12374	1.07937	1.10142	1.13639	1.2047	1.18263	1.11801	1.15856	1.10211	1.1177	1.11703	1.1883	1.17323	1.16461	1.11539	1.14319
					0.518232	0.548375	0.504465	0.506363	0.508275	0.510202	0.51193	0.520228	0.529688	0.568722	0.595897	0.599282	0.614366	0.643085	0.62325	0.664318	0.644193	0.602507	0.690135	0.633637	0.676415	0.725388	0.697532	0.633534	0.668135	0.629234	0.669196	0.652631	0.616696	0.615522	0.684911	0.684945	0.668029	0.632676	0.652011	0.677029	0.620076	0.651715	0.634299	0.681715	0.663629	0.613307	0.693247	0.699229	0.683288
0.93203	0.941108	0.890109	0.964532	0.956871	0.969138	0.955709	0.865048	0.945909	0.954848	0.956548	0.944242	0.938032	0.959093	0.964664	0.94251	0.964138	0.974591	0.96258	0.942564	0.953847	0.952817	0.956748	0.984718	0.967252	0.979008	0.948598	0.95469	0.958424	0.941829	0.937988	0.945385	0.924554	0.904441	0.916479	0.923351	0.933185	0.932735	0.936548	0.991761	0.973738	1.02477	1.00233	1.01489	1.01448	1.00767	1.02966	1.01256	1.06616	1.09221
0.789784	0.767484	0.772451	0.767946	0.774508	0.771668	0.77236	0.771432	0.775555	0.781143	0.754499	0.786105	0.787246	0.763361	0.74656	0.765624	0.739821	0.752773	0.72335	0.764989	0.697978	0.754455	0.754768	0.775099	0.771627	0.766833	0.743679	0.739209	0.751754	0.757343	0.748695	0.763412	0.765806	0.742807	0.731317	0.761962	0.774527	0.780262	0.809749	0.827751	0.826088	0.853774	0.861263	0.874409	0.966032	0.95467	0.873091	0.865592	0.960703	0.922724
0.696293	0.705227	0.696368	0.709228	0.690747	0.683938	0.719444	0.671892	0.704553	0.678981	0.697557	0.71753	0.707702	0.712252	0.684345	0.721718	0.69414	0.691322	0.699953	0.671113	0.693837	0.7036	0.680912	0.714048	0.743246	0.746535	0.784482	0.752395	0.768027	0.789645	0.765558	0.800144	0.791446	0.781636	0.783602	0.78263	0.790645	0.796699	0.822139	0.83063	0.807077	0.815898	0.809758	0.828022	0.846802	0.810377	0.801	0.831663	0.826112	0.849728
0.577486	0.587381	0.600597	0.578895	0.578622	0.585963	0.580879	0.572257	0.575756	0.573572	0.587916	0.599176	0.593056	0.572001	0.592447	0.570058	0.594178	0.583842	0.57766	0.577827	0.572214	0.581503	0.572747	0.590054	0.571511	0.578883	0.574456	0.571868	0.566046	0.578456	0.581533	0.581653	0.57502	0.585999	0.570173	0.59422	0.603214	0.629767	0.65257	0.663218	0.691798	0.691885	0.701225	0.684433	0.72373	0.720074	0.74821	0.745102	0.739702	0.744532
1.19114	1.18306	1.19209	1.20127	1.20849	1.2158	1.2232	1.23069	1.21209	1.17886	1.18753	1.1877	1.17874	1.16991	1.18495	1.16653	1.14867	1.13134	1.09412	1.08115	1.09227	1.10532	1.09353	1.07079	1.06368	1.05451	0.962763	1.02752	1.04186	1.07292	1.10247	1.13212	1.10745	1.12017	1.13308	1.14998	1.16084	1.16355	1.18834	1.22024	1.24517	1.25221	1.27667	1.29168	1.29821	1.32339	1.30413	1.31886	1.33915	1.31888
3.71819	3.71405	3.79122	3.74446	3.5375	3.68597	3.75448	2.86601	2.59252	3.49209	3.72159	3.69362	2.52027	2.71385	2.92492	3.42239	3.42948	3.51579	3.60655	3.70213	3.64237	3.58451	3.52846	1.49658	0.949697	0.695533	0.941996	1.45899	3.2338	3.12329	3.34627	3.46791	3.16666	3.56003	3.5908	3.60622	3.7124	3.87382	3.46711	3.77693	3.47519	3.9753	3.9474	3.87055	2.33694	4.12832	3.23398	3.76666	3.23419	1.60271
0.966156	0.952713	0.967508	0.958257	0.947526	0.932923	0.938115	0.93471	0.93482	0.926608	0.948334	0.930039	0.922082	0.939583	0.951077	0.933319	0.911494	0.929443	0.921606	0.911387	0.909724	0.908999	0.899536	0.913392	0.91666	0.927603	0.899074	0.933071	0.92321	0.919252	0.936472	0.98591	1.00646	1.01119	1.01002	1.06784	1.10395	1.05273	1.11538	1.13134	1.14776	1.16312	1.20438	1.34546	1.24899	1.31868	1.34255	1.3863	1.20124	1.3281
0.826561	0.792786	0.796237	0.854582	0.893851	1.05168	0.833382	0.828831	0.855551	0.789191	0.870035	0.832414	0.852234	0.874242	0.859881	0.74984	0.876066	0.860842	0.820512	0.752641	0.91997	0.841656	0.831273	0.872364	0.863451	0.862537	0.827545	0.845658	0.787198	0.815867	0.85943	0.827701	0.839421	0.924924	0.940956	0.965451	1.02363	1.15662	1.08267	1.07711	1.03364	1.09688	1.18387	1.17643	1.2217	1.19124	1.12426	1.09465	1.20521	1.13142
1.19569	1.19722	1.26463	1.25592	1.36022	1.31701	1.26651	1.31834	1.35483	1.32166	1.34436	1.36785	1.36589	1.36393	1.36198	1.36004	1.38434	1.41235	1.40451	1.46999	1.40858	1.42771	1.40118	1.4154	1.42411	1.45477	1.46564	1.37874	1.47423	1.44451	1.42377	1.53522	1.54781	1.52231	1.51263	1.57737	1.62147	1.66129	1.66134	1.70596	1.74389	1.75857	1.74432	1.81279	1.8103	1.86376	1.83834	1.8136	1.7948	1.77638
0.779418	0.755333	0.747081	0.741951	0.700904	0.781255	0.746733	0.754932	0.747322	0.73453	0.737458	0.74589	0.7357	0.748088	0.781205	0.762733	0.778079	0.799482	0.822429	0.790691	0.761577	0.781243	0.789836	0.79862	0.798558	0.743438	0.728794	0.752971	0.796229	0.769706	0.766032	0.781106	0.796785	0.798345	0.783482	0.769162	0.772375	0.787501	0.788188	0.776275	0.779129	0.789317	0.799775	0.746776	0.773329	0.783195	0.704909	0.711217	0.711364	0.711511
1.1536	1.11549	1.14508	1.17346	1.07478	1.14421	1.08801	1.10638	1.14665	1.0728	1.07925	1.0935	1.04351	1.0495	1.05724	1.04679	1.21935	1.03407	1.05338	1.05109	1.05598	1.03706	1.08878	1.1498	1.05893	1.07712	1.0704	1.02079	1.02781	1.01434	1.04682	1.0446	1.07713	1.06953	1.08905	1.12499	1.17418	1.23998	1.25969	1.32428	1.32945	1.34802	1.40062	1.39031	1.42165	1.43401	1.45124	1.47139	1.45913	1.46305
0.7141	0.730949	0.722936	0.695098	0.713534	0.748122	0.779753	0.788094	0.683696	0.716136	0.769836	0.76048	0.836499	0.762737	0.811162	0.772551	0.799032	0.828123	0.813	0.846775	0.81317	0.818785	0.881543	0.853637	0.867212	0.822652	0.821382	0.814598	0.861238	0.840297	0.832906	0.840141	0.890264	0.84256	0.874811	0.940851	0.920777	0.982631	1.021	1.00366	1.02861	1.04443	1.05007	0.988763	1.01109	0.956784	1.00794	1.0442	1.06745	1.00114
0.806845	0.76285	0.769824	0.77529	0.761006	0.74863	0.719491	0.743839	0.753626	0.754518	0.753591	0.761869	0.738667	0.738247	0.770244	0.740595	0.733082	0.747455	0.762403	0.749308	0.772588	0.682046	0.721529	0.768952	0.770261	0.757766	0.753779	0.764871	0.794677	0.792321	0.777096	0.777349	0.777603	0.780135	0.763542	0.778151	0.79333	0.809113	0.789772	0.855231	0.812874	0.786451	0.833145	0.807071	0.803772	0.811743	0.819873	0.858136	0.831652	0.824224
0.826387	0.826712	0.81865	0.82348	0.823778	0.809159	0.812094	0.820524	0.825252	0.834205	0.829758	0.824093	0.823827	0.823832	0.813654	0.81282	0.818792	0.790403	0.802796	0.822826	0.833291	0.837999	0.811741	0.840344	0.807922	0.809513	0.791474	0.804635	0.807175	0.814002	0.799277	0.81142	0.800986	0.797518	0.794609	0.799765	0.83001	0.841238	0.866324	0.919782	0.94943	0.988062	0.992143	0.985177	1.02245	0.993373	1.00023	0.992254	1.01184	0.990148
																									1.11508	1.252	1.42725	1.65956	1.98218	1.85998	2.28976	2.00379	1.61468	1.75023	1.91062	2.10336	2.55189	2.27367	2.22665	2.24484	1.94399	2.80239	2.84615	1.7893	1.64542	1.52295	1.41745	1.32562	1.24497
2.87997	2.74675	2.74352	2.88782	2.37459	2.8307	2.00124	2.73693	2.20864	2.75662	2.36859	2.80388	2.23402	2.42993	2.65933	2.47388	2.75228	2.7505	2.15695	2.06802	1.98614	1.91049	2.53605	1.88802	2.56283	2.55229	2.54184	2.49492	2.46215	2.5389	2.37722	2.61351	2.57976	2.46045	2.60957	2.73142	2.27392	2.91147	2.88942	3.1296	2.51027	2.09557	2.17456	2.25974	2.22769	2.22269	2.21772	2.21277	2.20784	2.34318
0.960637	0.994845	0.912165	0.893827	0.960546	1.06811	1.06003	0.977255	1.10468	1.03404	1.07177	1.03038	0.992066	0.956498	0.974368	1.05778	1.0441	1.12528	1.10554	1.11119	1.11691	1.13851	1.20921	1.28937	1.38092	1.31546	1.37763	1.34218	1.35192	1.31814	1.30006	1.35964	1.3412	1.38808	1.42102	1.4642	1.4572	1.4956	1.64241	1.6439	1.70798	1.8174	1.67971	1.91899	1.61665	2.03417	1.75313	1.27473	1.00145	1.01134
2.64537	2.71373	2.63419	2.8524	2.66588	2.67527	2.76335	2.84011	2.68383	2.66891	2.67338	2.75855	2.77291	2.75047	2.80488	2.7546	2.65661	2.63682	2.69333	2.65905	2.60578	2.59634	2.65504	2.71577	2.64632	2.6468	2.64032	2.69802	2.67677	2.66709	2.66796	2.6396	2.65255	2.66813	2.69468	2.74433	2.70601	2.80733	2.84603	2.8257	2.8747	2.99733	2.86258	2.85085	2.94399	2.98704	2.93747	2.93969	2.93053	2.92466
0.684302	0.688671	0.671301	0.677352	0.681585	0.704288	0.688879	0.704036	0.712045	0.695548	0.755898	0.726913	0.721212	0.712613	0.732236	0.721575	0.718001	0.709881	0.707802	0.724364	0.699503	0.698527	0.677253	0.707571	0.720282	0.733459	0.722887	0.728499	0.722803	0.71247	0.744138	0.74683	0.749541	0.752273	0.78746	0.828086	0.873131	0.909622	0.92976	0.941863	0.95086	0.954095	0.957352	0.961336	0.962653	0.963973	0.966407	0.968853	0.964273	0.977201
3.27473	3.07422	3.43787	3.05276	3.29847	3.13639	3.1831	3.297	3.1181	3.15592	3.13605	3.12197	3.1986	3.32061	3.25671	3.03842	3.12866	3.22443	3.32625	3.48245	3.47149	3.43311	3.46748	3.24891	3.32594	3.55386	3.5855	3.60053	3.62872	3.65734	3.39558	3.42898	3.41067	3.39255	3.39881	3.77159	3.96568	4.02465	3.97787	4.4038	4.14583	4.56125	4.8428	4.80098	4.75987	4.99418	4.84754	5.10951	5.17471	5.48847
0.993475	0.990605	1.02316	0.97065	1.00111	1.01543	1.05106	1.0944	1.0656	1.11895	1.15944	1.07465	1.11065	1.17786	1.23678	1.39002	1.28902	1.29775	1.29916	1.33608	1.25106	1.28572	1.41711	1.3518	1.31706	1.51987	1.34103	1.38973	1.63955	1.4962	1.42005	1.48797	1.50204	1.4036	1.53289	1.43808	1.26516	1.53996	1.41736	1.6292	1.69268	1.69687	1.81719	1.74009	1.92008	1.85237	1.93926	2.01263	2.05405	2.24965
1.81439	1.86404	1.93796	1.89861	1.93664	1.84724	1.911	1.81387	1.89622	1.86287	1.77665	1.78113	1.82239	1.75824	1.70158	1.75945	1.77557	1.72239	1.64722	1.71917	1.7865	1.80596	1.763	1.73641	1.73276	1.68194	1.74625	1.7139	1.65868	1.65374	1.69718	1.64953	1.72786	1.7665	1.80191	1.79022	1.79043	1.81209	1.76385	1.80645	1.74411	1.72825	1.75395	1.76626	1.81646	1.73395	1.67098	1.6914	1.7253	1.68019
1.07149	1.01765	1.02401	1.03954	1.05515	1.045	1.02098	1.09453	1.04989	1.04676	1.11548	1.03705	1.07783	1.07425	1.06896	1.07922	1.09172	1.11429	1.12598	1.1152	1.09921	1.05987	1.05027	1.06657	1.06318	1.05577	0.91553	0.927766	0.980679	1.03031	0.911511	0.98121	0.975861	0.953366	1.04672	1.00687	1.09204	1.15581	1.22612	1.20642	1.34485	1.33304	1.41844	1.45447	1.43344	1.46703	1.46333	1.53658	1.58191	1.58339
0.93403	0.92319	0.9126	0.772879	0.868916	0.755639	0.759558	0.764531	0.764387	0.795599	0.910228	0.923888	0.900183	0.934376	0.884399	0.816794	0.92961	0.881142	0.88267	0.873551	0.901727	0.923757	0.946892	0.89722	0.91653	0.922686	0.9303	0.913845	0.955716	0.935185	0.988737	0.939392	0.997849	0.935157	0.852379	0.929953	0.927465	0.924991	0.92253	0.920081	0.935265	0.867186	0.889725	0.889546	0.87767	0.825863	0.899057	0.915176	0.91124	0.907632
0.857148	0.866357	0.852616	0.82403	0.856325	0.848725	0.843926	0.831194	0.825834	0.829819	0.819294	0.825559	0.811362	0.812792	0.793717	0.801748	0.791102	0.790855	0.79274	0.771598	0.790797	0.78155	0.784171	0.780446	0.777434	0.791639	0.781656	0.78466	0.787795	0.776175	0.767178	0.779684	0.790084	0.800766	0.826782	0.830767	0.844247	0.881133	0.90176	0.923375	0.962562	0.978379	1.02148	1.03743	1.07248	1.08043	1.12304	1.12965	1.13259	1.15225
0.755492	0.724413	0.7316	0.685733	0.649519	0.621144	0.647077	0.650459	0.672796	0.663744	0.674132	0.709208	0.686574	0.667857	0.665041	0.677757	0.668577	0.686127	0.665234	0.63752	0.649613	0.648582	0.654832	0.623136	0.64099	0.620452	0.63317	0.62721	0.643764	0.649538	0.67405	0.679488	0.662535	0.651807	0.62917	0.696074	0.708465	0.753153	0.73307	0.749192	0.807673	0.772565	0.757792	0.747769	0.781397	0.75551	0.759672	0.773979	0.756909	0.761447
																																			1.24158	1.26508	1.28949	1.41969	1.47235	1.35818	1.39052	1.45472	1.86891	1.3227	1.40375	1.66833	1.68457	1.74186	1.75043
6.00421	6.35592	6.17429	6.49227	6.34418	6.34499	6.26626	6.23834	6.33486	6.57294	6.03972	5.24701	6.39374	6.14105	6.27999	6.22747	6.60125	6.00188	5.77195	5.99388	5.71445	5.51235	5.7175	5.56168	5.67041	5.49078	5.69364	4.93605	5.97752	5.78299	6.05963	5.69943	5.63464	5.59797	5.84528	6.31721	6.33123	6.79439	5.86797	7.21772	7.06382	6.82059	6.91226	6.43354	6.22151	5.7934	6.15945	6.86652	6.03631	6.63885
0.708977	0.693059	0.79371	0.851507	0.838115	0.828327	0.788105	0.839517	0.770569	0.846135	0.821769	0.794486	0.798554	0.762975	0.761264	0.745024	0.708104	0.806865	0.817451	0.822825	0.779771	0.740999	0.738012	0.73505	0.729251	0.814801	0.795391	0.721105	0.773355	0.772561	0.803461	0.745433	0.783893	0.768658	0.809449	0.878092	0.835168	0.822425	0.852322	0.827759	0.822531	0.911178	0.896158	0.881625	0.872774	0.864098	0.802887	0.862446	0.847265	0.834511
1.33361	1.24703	1.23318	1.35648	1.24837	1.21259	1.02944	1.30999	1.26697	1.22668	1.18888	1.1772	1.28065	1.38927	1.2133	1.147	1.44114	1.31428	1.60285	1.6617	1.50043	1.46784	1.43995	1.3934	1.40241	1.41153	1.42078	1.08757	1.37552	1.1229	1.20519	1.15387	1.28085	1.18601	1.11846	1.51466	2.34555	1.54763	1.44539	1.35582	1.2767	1.2063	1.33198	1.20853	1.58885	1.29524	1.40662	1.53895	1.4749	1.57247
																																		0.539681	0.54966	0.560016	0.570769	0.581943	0.593563	0.724428	0.929317	0.881957	0.81342	0.754768	0.704005	0.65964	0.620535	0.653593	0.588092
0.552851	0.506469	0.534998	0.566933	0.542177	0.605663	0.568408	0.6073	0.593706	0.567188	0.638406	0.618318	0.609547	0.673222	0.638463	0.675913	0.668101	0.668755	0.646072	0.683318	0.712651	0.625599	0.650765	0.644433	0.660631	0.641297	0.657774	0.631382	0.687321	0.648078	0.651388	0.661613	0.624334	0.658797	0.660126	0.67724	0.704288	0.707761	0.679053	0.738734	0.765342	0.759036	0.872875	0.873202	0.781783	0.774714	0.79471	0.900064	0.848238	0.867835
0.518808	0.507999	0.50226	0.526733	0.504128	0.543401	0.524753	0.536356	0.527832	0.523704	0.579649	0.564608	0.531623	0.551418	0.538874	0.552405	0.547481	0.544645	0.530443	0.517259	0.513968	0.510234	0.51665	0.516055	0.517254	0.508503	0.511635	0.509442	0.507269	0.505113	0.535509	0.519529	0.521769	0.516607	0.519647	0.516015	0.524819	0.522232	0.546904	0.538872	0.538488	0.535094	0.551616	0.549625	0.526744	0.572419	0.557582	0.557271	0.556961	0.555175
0.758938	0.729545	0.75903	0.761349	0.768718	0.744276	0.73991	0.786081	0.747284	0.70467	0.724604	0.715868	0.739045	0.708389	0.726845	0.714923	0.725656	0.719213	0.736779	0.755225	0.694046	0.738725	0.766903	0.735334	0.706261	0.699248	0.702664	0.739572	0.734408	0.684064	0.703209	0.687024	0.703179	0.710475	0.675262	0.754738	0.700851	0.716436	0.727757	0.737727	0.747974	0.674466	0.761773	0.749238	0.815022	0.74908	0.71187	0.755587	0.738362	0.744739
	1.40626	1.43498	1.35901	1.72675	1.83709	1.9625	1.69933	1.37512	1.40587	1.43803	1.20122	1.12611	1.05983	1.03547	1.01221	0.989968	1.03828	1.16659	1.42662	1.44648	1.46689	1.51473	1.38665	1.38483	1.38301	1.3889	1.39288	1.25448	1.29595	1.34026	1.35522	1.37051	1.38615	1.40215	1.41852	1.15383	0.972384	1.06348	1.17342	1.3087	1.47924	1.46721	1.45537	1.40957	1.36657	1.39213	1.38682	1.38156	1.29066
0.915661	0.879893	0.902406	0.881572	0.924158	0.953303	0.911255	0.92712	0.933928	0.986833	0.899186	0.91932	0.94138	0.964524	0.988835	0.961103	0.930822	0.902391	0.95874	0.934026	0.951251	0.939336	0.889499	0.952068	0.914574	0.966437	0.92284	0.971572	0.938846	0.907253	0.920329	0.943333	0.936037	0.915344	0.940912	0.994124	0.963468	1.01309	1.05481	0.8819	0.950108	1.05756	1.19242	1.18992	1.18743	1.18495	1.18248	1.32532	1.36958	1.29304
4.11336	4.1092	4.48776	4.44508	4.35409	4.6396	4.7311	4.77053	4.38903	4.36579	4.31802	4.46144	4.32174	4.2242	4.08657	3.88912	3.90491	3.7555	3.4777	3.2486	3.68262	3.26138	3.12625	3.0728	3.2571	3.18635	3.18725	3.10822	3.18829	3.48508	3.35716	3.39324	3.55935	3.61171	3.45327	4.17389	4.50643	4.11619	4.12634	4.06828	4.21805	3.91866	3.71378	3.86946	3.51362	3.60554	3.74334	4.38786	4.04222	4.31064
0.940986	0.942308	0.908638	0.927865	0.936679	0.918415	0.918478	0.930007	0.970148	0.933221	0.926937	0.911666	0.943075	0.912296	0.930377	0.930354	0.92424	0.908464	0.916363	0.922194	0.908751	0.901314	0.903378	0.929528	0.91339	0.920695	0.921909	0.941314	0.941552	0.977842	0.970016	0.97711	0.98811	1.00465	1.03926	1.08463	1.10319	1.13423	1.15052	1.18883	1.21785	1.23123	1.26438	1.25428	1.27336	1.28884	1.28344	1.29531	1.31001	1.30319
1.12712	1.07759	1.12889	1.10386	1.14208	1.16979	1.08216	1.05975	1.03826	1.17903	1.15138	1.10417	1.08307	1.06276	1.15273	1.2029	1.22609	1.16962	1.13314	1.09888	1.20919	1.19021	1.14849	1.13721	1.12614	1.11694	1.03775	1.08614	1.11566	1.06918	1.02494	0.984206	1.09129	0.886356	1.01032	1.18165	1.11942	1.06342	1.01275	0.963174	0.974758	0.986624	0.998782	1.01124	1.02402	1.01421	1.00458	0.99513	0.985859	0.976759
0.549541	0.541724	0.568571	0.539872	0.548289	0.553351	0.517728	0.518227	0.509656	0.542557	0.539062	0.538229	0.53413	0.531407	0.527067	0.525269	0.528011	0.539594	0.560082	0.552101	0.558864	0.540639	0.528901	0.555368	0.537114	0.544427	0.551942	0.545354	0.556032	0.567641	0.577826	0.588382	0.571374	0.61515	0.591179	0.60587	0.71334	0.747661	0.752344	0.790205	0.748562	0.72864	0.712413	0.778257	0.780175	0.782102	0.78404	0.763661	0.777594	0.787663
0.984921	0.890194	0.894489	0.989506	0.961968	0.94621	0.925467	1.04545	1.0114	0.94548	0.995247	1.05054	1.11235	1.03291	1.09495	0.947989	0.933649	1.06653	0.992487	0.981067	0.9604	0.972779	0.985482	0.990974	1.00778	1.05285	1.09583	1.06634	1.07665	1.13609	1.06713	0.974754	1.05211	1.09744	0.987717	0.971748	1.00136	1.06598	1.09592	0.969753	1.0504	0.986677	1.10027	1.00287	0.977173	1.00984	1.0206	1.03159	1.02698	1.02241
0.576791	0.578276	0.573814	0.566933	0.579256	0.56456	0.580089	0.561618	0.562416	0.570386	0.55845	0.562562	0.555094	0.562399	0.546172	0.559702	0.562258	0.561105	0.563578	0.560895	0.561886	0.565685	0.568701	0.578188	0.573166	0.580256	0.597949	0.579059	0.595948	0.58875	0.577634	0.586465	0.592542	0.597511	0.608249	0.606808	0.621827	0.635352	0.655468	0.681418	0.699942	0.688697	0.704405	0.690744	0.69813	0.687895	0.700475	0.697713	0.709035	0.709075
0.76437	0.747696	0.747906	0.753168	0.758557	0.748661	0.76172	0.736243	0.750186	0.784513	0.773126	0.767462	0.768609	0.783472	0.75802	0.752792	0.741883	0.73865	0.752705	0.762391	0.766339	0.755989	0.770712	0.737697	0.747548	0.739842	0.745956	0.730912	0.725749	0.736466	0.73375	0.720107	0.7964	0.782445	0.786031	0.827093	0.878351	0.88954	0.957683	1.03003	1.06002	1.11887	1.17909	1.19566	1.20389	1.21044	1.25694	1.28048	1.28368	1.29732
0.931432	0.978701	0.942772	0.976391	0.997952	0.920235	0.994427	0.964285	0.990683	0.938153	0.939712	0.963143	0.987772	0.972616	0.957919	0.939569	0.932357	0.925255	0.918261	0.902789	0.887829	0.902734	0.918149	0.893824	0.870755	0.958379	0.9483	0.938431	0.924602	0.896644	0.900521	0.922708	0.945161	0.910263	0.952767	0.979168	0.932642	0.990969	0.88975	0.980962	1.00384	1.0326	0.986394	0.977581	0.960843	0.965361	0.915671	0.96709	0.96157	0.869587
0.660599	0.623119	0.61713	0.613647	0.625355	0.607488	0.603514	0.591177	0.598811	0.572618	0.619329	0.630875	0.628054	0.607676	0.628476	0.618736	0.632762	0.620809	0.579169	0.608263	0.662354	0.667133	0.655174	0.624546	0.641752	0.598116	0.661425	0.640435	0.630394	0.616873	0.615278	0.664016	0.675458	0.669831	0.658802	0.664421	0.686642	0.751709	0.73056	0.791943	0.772842	0.809444	0.803179	0.815467	0.812467	0.82774	0.818014	0.829119	0.871111	0.843095
0.836059	0.860964	0.851787	0.846529	0.828435	0.862829	0.841981	0.834258	0.856209	0.817426	0.824432	0.795493	0.846573	0.822681	0.816044	0.810612	0.794834	0.763756	0.840507	0.834689	0.887123	0.805998	0.810984	0.762349	0.779779	0.815948	0.789962	0.800174	0.777313	0.765859	0.777242	0.791994	0.786849	0.795421	0.893367	0.797095	0.82684	0.83705	0.876724	0.982074	0.970231	0.967382	0.92479	0.952261	0.943781	0.927016	0.995258	1.00359	1.03058	1.01897
0.727113	0.763865	0.712395	0.667424	0.715353	0.811715	0.745346	0.707856	0.673957	0.669445	0.681498	0.660261	0.679021	0.683092	0.680766	0.707341	0.688771	0.709224	0.706866	0.693116	0.671806	0.680879	0.69693	0.706747	0.672377	0.698405	0.703321	0.701444	0.700509	0.724579	0.721604	0.695488	0.694995	0.694504	0.694012	0.705733	0.723487	0.804632	0.786107	0.768416	0.776328	0.784404	0.792651	0.783601	0.797512	0.746074	0.766774	0.748104	0.730322	0.817711
1.57617	1.65001	1.624	1.54613	1.61088	1.73542	1.65848	1.84789	1.88055	1.7989	1.81149	1.61764	1.65556	1.92255	1.90916	1.84085	1.78698	1.74564	2.02001	1.90379	2.11027	2.26996	2.17109	2.12567	2.11359	2.06269	1.99621	1.52691	1.64051	1.66131	1.66049	1.7283	1.77702	1.78704	1.72922	1.59704	1.59859	1.60991	1.77027	1.58775	1.63879	1.71155	1.61406	1.6371	1.73242	1.66964	1.82225	1.66767	1.59277	1.59473
0.798597	0.760296	0.725501	0.72703	0.711149	0.719751	0.78172	0.812259	0.81794	0.85072	0.886237	0.83869	0.816997	0.851282	0.846209	0.776427	0.744028	0.714224	0.676798	0.703741	0.696333	0.685779	0.729484	0.635652	0.615325	0.627792	0.675521	0.653158	0.643915	0.575045	0.611092	0.651961	0.569814	0.611551	0.571437	0.573162	0.582688	0.642787	0.642119	0.624316	0.647391	0.645991	0.634055	0.631663	0.647777	0.657086	0.677019	0.661416	0.634537	0.654023
1.58073	1.64208	1.53568	1.6464	1.62259	1.68113	1.74405	1.58651	1.45506	1.52916	1.61121	1.70257	1.80491	1.79945	1.79403	1.78864	1.78328	1.77796	1.6007	1.74157	1.90963	1.9699	2.24504	1.87548	1.86431	1.85328	1.91624	1.85565	1.84982	1.97982	1.99837	2.01727	2.03653	2.05616	1.63301	1.77904	1.81987	1.97728	1.83213	1.70684	1.64429	1.75153	1.75788	1.74699	2.1017	2.07038	1.89568	2.07682	2.29624	2.21087
2.40425	2.70794	3.14926	2.36094	2.6944	3.13756	3.07529	3.01544	2.95788	2.95393	2.66334	3.27885	3.70061	2.57189	3.14892	3.02462	2.90976	2.95583	2.05177	3.18436	3.3737	3.1324	3.26643	3.41244	3.51064	3.34604	2.61513	3.27618	3.73708	3.04065	3.214	3.75972	3.63244	3.91169	3.51756	3.27164	3.69806	3.76478	3.80616	4.22553	3.76566	3.90539	4.09875	3.91638	3.66176	3.81978	3.71199	3.20837	3.07391	3.00324
0.81842	0.819579	0.820741	0.821907	0.823076	0.875851	0.935857	0.820276	0.835325	0.927241	0.810128	0.825754	0.894241	0.816954	0.817798	0.818678	0.819561	1.02778	1.37785	1.74474	2.37795	2.45193	2.33125	2.39882	2.24291	2.23183	2.22712	2.1291	2.09444	1.98971	1.92466	1.86426	1.95344	1.99037	1.98366	1.98835	2.15077	1.61474	1.61551	2.34422	2.65761	2.3798	2.07475	2.74013	1.96714	1.96538	2.09716	1.8021	1.98342	1.75121
1.06404	0.95357	0.992917	1.07732	0.946229	1.03405	0.992655	0.965583	0.945294	0.940589	0.935931	1.04173	1.03328	0.963756	0.997702	0.987812	1.06464	0.987064	1.0389	1.06029	1.01785	1.05093	1.00919	1.01008	0.974076	0.982069	0.959982	0.962507	1.01396	0.971173	0.976188	0.937847	1.02582	1.00991	0.963133	0.993423	1.07253	1.00963	1.02467	0.982129	1.03962	0.94234	1.00193	0.958201	0.973094	0.946653	0.919684	0.894208	1.03584	1.0031
0.669545	0.64618	0.661259	0.667948	0.650766	0.661645	0.661973	0.660572	0.651632	0.660421	0.64962	0.649982	0.666363	0.666878	0.650956	0.68184	0.638836	0.64868	0.658192	0.672051	0.661882	0.665993	0.65317	0.683685	0.688325	0.672292	0.66792	0.678455	0.674275	0.672331	0.672566	0.669139	0.683101	0.687338	0.690155	0.713348	0.716885	0.751152	0.778691	0.83053	0.88249	0.827841	0.863035	0.914636	0.928677	0.970993	0.98867	1.01241	0.998272	1.01005
0.758987	0.730414	0.686372	0.614092	0.628741	0.644107	0.660241	0.677205	0.642345	0.593373	0.614086	0.636297	0.660175	0.657937	0.633379	0.578206	0.572369	0.566648	0.561041	0.581107	0.58924	0.634388	0.682726	0.689004	0.662756	0.672187	0.595044	0.523121	0.509001	0.553472	0.606458	0.648986	0.616136	0.599807	0.666732	0.63642	0.639696	0.648324	0.64374	0.687734	0.679057	0.706893	0.690325	0.62557	0.669033	0.665183	0.613893	0.66793	0.596827	0.646838
3.25618	3.2503	3.4372	3.16317	3.09881	3.57912	3.41944	3.28891	3.28597	3.28617	3.33447	3.12224	2.93498	3.27959	3.46653	3.34562	3.29475	3.50894	3.50879	3.70138	3.60299	3.74273	3.69911	3.65401	3.27571	3.23806	3.26923	3.41696	3.70625	3.01583	3.4042	2.96648	3.27634	3.17422	3.33479	3.68184	3.33841	3.48721	3.18304	3.07026	3.48323	3.10873	3.60582	3.46195	3.44887	3.45569	3.81823	3.34863	3.55241	3.34365
3.43267	3.24649	3.59104	3.47514	3.37247	3.27569	3.18431	2.92299	3.06949	2.80143	2.57643	2.61641	2.65766	1.75712	1.31242	1.04735	0.871358	1.39626	3.51171	1.96818	1.36724	1.04742	0.848865	0.944013	1.06319	1.08546	1.10869	1.13294	1.08063	1.03294	0.826744	0.955811	1.10299	1.30375	1.59384	2.04999	2.8719	3.29653	2.87868	3.65593	2.57076	2.45062	2.79426	1.57635	1.09784	1.18674	1.76516	3.44356	3.3863	2.64438
0.906533	0.97882	1.06363	1.04603	1.029	1.01251	0.996542	0.960152	0.957037	0.953943	1.01393	1.02538	1.03709	1.02406	1.01136	0.998961	0.986867	0.975062	0.963536	0.95228	0.953309	0.95434	0.955373	0.956408	0.955414	0.954421	1.01405	1.08164	1.04816	1.0167	1.11176	0.913752	1.018	1.03082	1.04396	1.05744	1.07128	1.08548	1.067	1.04915	1.03188	1.01516	0.998985	0.983314	1.01405	1.04677	1.05117	1.05562	1.0601	1.06462
0.676483	0.649223	0.678894	0.676751	0.64901	0.646855	0.650789	0.642846	0.645102	0.6378	0.649247	0.655833	0.647498	0.641782	0.645416	0.645148	0.641523	0.647583	0.643953	0.640363	0.624516	0.625502	0.617537	0.615824	0.627131	0.62701	0.616753	0.605797	0.595223	0.602438	0.602972	0.609098	0.626212	0.631698	0.649532	0.660944	0.679607	0.692203	0.705057	0.745281	0.763581	0.808462	0.818034	0.862903	0.884522	0.880729	0.9303	0.902688	0.969585	0.981544
0.88879	0.79864	0.829144	0.82557	0.81951	0.826136	0.838765	0.848213	0.816448	0.817421	0.830274	0.851736	0.833714	0.789604	0.807169	0.777138	0.815459	0.788325	0.780609	0.794554	0.803229	0.810581	0.838659	0.813417	0.772117	0.794437	0.782457	0.765522	0.757347	0.762089	0.805151	0.812878	0.792565	0.795876	0.792054	0.794071	0.803884	0.778698	0.805516	0.756564	0.794251	0.785454	0.781018	0.780051	0.783157	0.804075	0.78093	0.847044	0.812624	0.79198
0.962131	0.941521	0.94905	0.988752	0.97227	1.00073	0.974931	0.998137	0.9825	0.99733	1.0168	1.00566	1.03924	1.07506	1.07432	1.04884	1.15355	1.12139	1.10856	1.11881	1.02148	1.04205	1.06728	1.04725	0.991273	1.00183	0.98461	0.945865	0.98763	0.976556	0.905578	1.00738	1.00651	1.05143	1.08167	1.16266	1.20452	1.20046	1.238	1.21322	1.26459	1.27496	1.2926	1.30367	1.27147	1.24261	1.35122	1.25584	1.30453	1.31454
0.727159	0.720869	0.710965	0.739056	0.726806	0.703572	0.700659	0.70938	0.730167	0.728197	0.688118	0.77618	0.838948	0.757462	0.690403	0.696154	0.702001	0.807433	0.719906	0.803313	0.762158	0.725014	0.691323	0.705461	0.713478	0.746304	0.699889	0.697367	0.694864	0.717335	0.722065	0.726858	0.762859	0.769265	0.790964	0.820322	0.834421	0.862081	0.921308	0.938993	0.95737	0.97648	1.03143	1.10748	1.1341	1.05977	1.10011	1.05121	1.06052	1.35851
0.526333	0.544175	0.596459	0.577808	0.514961	0.508676	0.530652	0.554614	0.567453	0.536016	0.507879	0.51242	0.517042	0.521749	0.522313	0.522878	0.523444	0.521281	0.519136	0.519493	0.517121	0.51477	0.505297	0.508464	0.508922	0.507116	0.506053	0.504994	0.503939	0.502889	0.501843	0.500802	0.502516	0.504242	0.505979	0.507729	0.545973	0.543209	0.579112	0.594897	0.601149	0.607459	0.615687	0.59711	0.614911	0.639363	0.647093	0.672106	0.660137	0.684472
1.0457	1.14544	1.15012	1.15484	1.04931	1.13737	1.09822	1.05513	1.08932	1.03105	1.1439	1.00106	1.04085	1.07669	1.06277	1.04921	1.13891	1.16579	1.05498	1.04444	1.14828	1.05653	1.09623	1.06495	1.02459	1.14343	1.00862	1.03121	1.0871	1.0442	1.13449	1.10479	1.09817	1.0132	1.10469	1.03884	1.06822	1.11182	1.11833	1.13643	1.15512	1.1028	1.18702	1.17272	1.15876	1.20828	1.09436	1.20807	1.19374	1.17036
0.564787	0.556096	0.571855	0.550298	0.570443	0.559516	0.580046	0.583396	0.574494	0.584425	0.570037	0.563923	0.567428	0.561032	0.565698	0.572215	0.57132	0.565672	0.559289	0.555419	0.565066	0.536878	0.564968	0.533784	0.546614	0.558538	0.559666	0.565948	0.566817	0.559207	0.549815	0.565135	0.589429	0.566436	0.567578	0.579634	0.571925	0.585789	0.580056	0.596263	0.601527	0.624832	0.591538	0.610327	0.623577	0.636529	0.620821	0.647291	0.650942	0.634001
0.856123	0.864468	0.872978	0.890055	0.878418	0.854036	0.891491	0.889835	0.897741	0.937607	0.882196	0.909705	0.8968	0.912024	0.927774	0.894444	0.94372	0.897037	0.831895	0.827659	0.804021	0.781695	0.856696	0.762566	0.841816	0.767234	0.798806	0.849566	0.894341	0.777103	0.801255	0.877589	0.888602	1.03891	0.86554	0.930514	0.951131	0.922218	0.924097	0.925984	0.94111	1.01439	1.11739	1.10944	1.17565	1.13742	1.21588	1.14635	1.14582	1.1453
0.846161	0.845988	0.83532	0.857588	0.830618	0.827519	0.83352	0.848142	0.836716	0.838034	0.837089	0.82851	0.83348	0.828735	0.834277	0.81915	0.840314	0.828119	0.8199	0.811343	0.802588	0.779941	0.778921	0.780749	0.801013	0.795117	0.790468	0.801137	0.797629	0.775721	0.789185	0.786642	0.778153	0.814009	0.780703	0.816756	0.861563	0.880816	0.868034	0.903696	0.915314	0.953801	0.963264	0.959014	0.99764	1.01904	1.03936	1.04296	1.03349	1.03085
0.567786	0.557869	0.550994	0.566941	0.565578	0.572768	0.57133	0.572732	0.580998	0.572178	0.583162	0.584587	0.607015	0.598148	0.592337	0.591783	0.630931	0.611854	0.626615	0.604114	0.617544	0.623397	0.619378	0.605669	0.621471	0.614213	0.616197	0.618524	0.612966	0.620356	0.604968	0.613658	0.62594	0.625363	0.640298	0.638861	0.643979	0.647931	0.647976	0.650734	0.613296	0.6173	0.642295	0.633308	0.654138	0.633282	0.612036	0.622983	0.623431	0.646465
0.900009	0.916226	0.897972	0.908043	0.938593	0.920794	0.931552	0.902604	0.924497	0.929256	0.950882	0.909804	0.900132	0.903251	0.906392	0.906615	0.904975	0.908782	0.912622	0.930517	0.937582	0.944755	0.952039	0.940437	0.929114	0.924498	0.919927	0.915401	0.91776	0.891913	0.903029	0.914425	0.92266	0.927714	0.945092	0.963134	1.03726	1.09385	1.15235	1.21746	1.12932	1.17335	1.16182	1.15052	1.3017	1.20281	1.20073	1.19866	1.1579	1.18766
0.851721	0.842202	0.81654	0.857559	0.810331	0.918283	0.901677	0.896423	0.92385	0.8755	0.934664	0.912838	0.976985	0.88821	0.902928	0.897064	0.891275	0.88556	0.879918	0.862048	0.874425	0.847602	0.838185	0.828974	0.822838	0.816793	0.810835	0.803554	0.796402	0.80743	0.826842	0.847211	0.847242	0.825786	0.805389	0.821668	0.838619	0.852059	0.865936	0.899443	0.897484	0.915224	0.966038	0.958483	0.943313	0.987292	1.03453	1.07161	1.01723	1.04493
0.862646	0.869385	0.847871	0.853449	0.818556	0.832345	0.845751	0.842937	0.884726	0.890968	0.886253	0.87242	0.888278	0.91163	0.879149	0.829642	0.921117	0.935378	0.870569	0.893453	0.911915	0.903723	0.920557	0.930657	0.892549	0.933282	0.968029	0.920903	0.958935	0.863815	0.870478	0.880534	0.888532	0.935979	0.985745	0.94044	0.961094	1.01758	1.04349	0.997241	1.11918	1.13048	1.185	1.22069	1.2027	1.23698	1.33305	1.27793	1.25965	1.33347
0.82914	0.842147	0.816724	0.794298	0.80045	0.83223	0.837879	0.835838	0.824282	0.821353	0.82256	0.829249	0.837113	0.842786	0.88284	0.87294	0.87508	0.859275	0.856516	0.871723	0.876844	0.891019	0.877507	0.885172	0.906804	0.889103	0.874904	0.884266	0.872627	0.854432	0.863582	0.885582	0.90455	0.92499	0.925103	0.967404	0.973929	0.995608	1.04241	1.09276	1.07908	1.09733	1.11507	1.09937	1.13707	1.13587	1.11646	1.10916	1.12647	1.12088
0.776028	0.767675	0.759133	0.772664	0.7644	0.762868	0.761348	0.752307	0.752038	0.750825	0.773467	0.738675	0.766003	0.763793	0.757399	0.772386	0.762698	0.766779	0.740899	0.743429	0.74269	0.73957	0.738934	0.739316	0.75417	0.746907	0.7363	0.741876	0.729307	0.752835	0.760703	0.731186	0.739636	0.759892	0.764223	0.810632	0.828655	0.87482	0.918743	0.949112	0.997787	1.0553	1.10003	1.138	1.148	1.18145	1.19669	1.21343	1.24157	1.27538
0.746856	0.742846	0.749215	0.751288	0.775395	0.760986	0.77573	0.789002	0.773472	0.774798	0.76681	0.793996	0.778365	0.774179	0.753587	0.802334	0.802176	0.783723	0.788201	0.792731	0.797314	0.784577	0.772404	0.760602	0.745592	0.76701	0.747781	0.738049	0.738302	0.750538	0.752676	0.748198	0.759448	0.771041	0.760293	0.780461	0.801728	0.808019	0.81441	0.820902	0.797613	0.79006	0.782648	0.775374	0.777539	0.779717	0.777698	0.77569	0.773692	0.771704
1.79139	1.7444	1.7284	1.78543	1.81314	1.74093	1.79825	1.8519	1.89693	1.8616	1.85591	1.84185	1.74332	1.72361	1.66296	1.78072	1.7119	1.65133	1.71944	1.64474	1.72009	1.63168	1.60984	1.77874	1.56354	1.8214	1.70865	1.69659	1.73642	1.73342	1.61154	1.53546	1.52794	1.42078	1.47436	1.436	1.39877	1.54045	1.58332	1.67077	1.7118	1.61921	1.63006	1.55558	1.48728	1.51605	1.57923	1.51918	1.56478	1.35397
2.20688	2.26831	1.93893	2.72353	2.15773	2.24907	2.50833	2.19457	1.94808	1.59034	1.7065	1.78578	1.87759	1.86802	2.30776	2.1069	2.34946	1.94799	1.8242	2.12238	2.21837	1.98535	2.03259	2.08212	2.04855	2.20505	2.58586	2.72427	2.66661	2.36786	2.77347	4.10696	3.49038	3.65799	3.32548	3.02978	3.00463	3.12893	3.44766	3.40108	3.61391	4.11926	3.23784	3.72691	3.26919	3.44357	3.63761	3.31394	3.47101	3.18339
1.62643	1.8987	1.85891	1.56449	1.55829	1.62775	1.5989	1.52037	1.25413	1.22782	1.179	1.1778	1.19807	1.23782	1.06344	1.08773	1.15018	1.02997	1.10828	0.970357	1.04283	0.927019	0.957197	0.950059	1.08929	1.01597	1.08143	1.04764	1.06952	1.18676	1.16533	1.1449	1.33215	1.1742	1.20265	1.18151	1.26152	1.30617	1.18897	1.07665	1.2184	1.37942	1.21644	1.18282	1.17375	1.18282	1.14277	1.12408	1.1149	1.32472
0.941539	0.929443	0.912811	0.940142	0.91534	0.910571	0.87438	0.875967	0.857208	0.965968	0.874163	0.89948	0.881311	0.861969	0.871902	0.865555	0.818703	0.889167	0.9413	0.883322	0.832072	0.764002	0.753552	0.862503	0.790237	0.833187	0.874652	0.817944	0.768142	0.781503	0.795336	0.809667	0.754091	0.786808	0.83696	0.948447	0.873343	0.868731	0.911491	0.958679	0.942865	1.01969	1.19122	1.0423	1.07201	1.09791	1.07354	1.11836	1.09974	1.34564
0.923923	0.893363	0.873616	0.892421	0.898367	0.889869	0.893861	0.928059	0.912912	0.928129	0.883344	0.893143	0.88054	0.847175	0.868115	0.839251	0.872601	0.859239	0.843759	0.851379	0.857452	0.872739	0.876643	0.857051	0.86272	0.845883	0.899153	0.872754	0.863997	0.882263	0.901317	0.852727	0.856261	0.859823	0.861428	0.854321	0.942985	0.865156	0.858549	0.984553	0.871288	0.907287	0.878979	0.852384	0.827351	0.803746	0.781451	0.760359	0.740376	0.760312
0.749338	0.794823	0.786161	0.791731	0.799636	0.760497	0.780745	0.784643	0.871338	0.785331	0.755795	0.809741	0.742656	0.821381	0.733421	0.756891	0.830731	0.88508	0.810271	0.822226	0.788138	0.819095	0.771043	0.81225	0.779598	0.825346	0.793057	0.76938	0.825824	0.803369	0.865921	0.79098	0.790568	0.773125	0.766933	0.760839	0.754841	0.877095	0.822317	0.87762	0.895381	0.943598	0.978797	1.01673	1.03244	1.04865	1.06538	1.05262	1.02429	1.01278
	0.826279	0.912632	0.985498	0.907101	0.953853	0.882051	0.886468	0.890931	1.05898	0.989312	0.936841	0.892815	0.967799	0.901016	0.915192	0.976759	0.980993	0.970755	0.972777	0.906637	0.974356	0.891282	0.951457	0.887218	0.861172	0.888689	0.944328	0.912319	0.974009	0.998118	0.933436	1.01652	0.983907	1.00812	1.04022	1.01339	0.987903	0.968385	0.987718	0.985719	0.826371	0.890255	0.861991	0.84084	0.775527	0.744102	0.71975	0.657817	0.702794
	1.66942	1.82442	1.65701	1.55956	1.51544	1.49042	1.51917	1.22923	1.4612	1.35411	1.77259	1.40301	1.39336	1.53966	1.41327	1.51939	1.46406	1.53651	1.39593	1.4213	1.32964	1.51277	2.06506	1.5769	1.69955	2.02322	1.77656	2.07364	2.05934	2.04524	2.03133	2.0176	2.43197	3.06052	2.7731	2.41039	2.77153	2.34916	2.75273	2.76786	2.97352	2.97523	2.36423	2.80288	2.62571	1.99501	2.5464	2.0603	2.16973
	1.0144	0.902359	0.92034	0.939052	0.929946	0.921015	0.912253	0.873768	0.87394	0.860718	0.847889	0.93808	0.896053	0.85763	0.842308	0.827523	0.855241	0.884879	0.82313	0.966189	0.939317	0.946532	0.90041	0.843722	1.00793	1.25149	1.11119	0.99918	0.905611	0.828066	0.908932	0.907326	0.861874	0.820759	0.863868	0.889184	0.916028	1.0461	1.02097	1.11373	1.0825	1.12545	1.19186	1.22925	1.48622	1.30843	1.34284	1.36706	1.28318
	1.23753	1.28184	1.29156	1.2042	1.20265	1.2734	1.35299	1.14748	1.34862	1.297	1.30689	1.13891	1.15101	1.14765	1.14431	1.25592	1.28441	1.25671	1.28288	1.11902	1.15289	1.18887	1.22716	1.19691	1.26567	1.34282	1.31817	1.35106	1.34494	1.33887	1.30342	1.33656	1.24623	1.22772	1.38834	1.38744	1.40277	1.41843	1.4642	1.41751	1.46056	1.5063	1.555	1.51621	1.47932	1.52495	1.54926	1.62422	1.65544
	0.638345	0.634416	0.618187	0.611293	0.640434	0.640555	0.640677	0.640798	0.62901	0.617648	0.606689	0.610428	0.614214	0.618047	0.607418	0.582181	0.608271	0.611054	0.642538	0.623395	0.622938	0.620592	0.627743	0.635138	0.620023	0.609104	0.640118	0.630377	0.61991	0.618966	0.641097	0.634967	0.628953	0.626939	0.637664	0.648761	0.660252	0.67815	0.697045	0.717024	0.738181	0.733359	0.7286	0.73243	0.7363	0.726434	0.716829	0.707475	0.654167
			0.907282	0.907001	0.906721	0.906441	0.858196	0.889812	0.895689	0.901645	0.936871	0.974963	0.895947	0.828778	0.831795	0.876465	0.926204	0.981928	0.998064	0.933718	0.877167	0.979336	0.967131	0.92676	0.889623	0.855348	0.873104	0.891612	0.910922	0.837642	0.87989	0.926627	0.978607	0.84405	0.859516	0.906547	0.959023	0.928019	0.898957	0.969783	0.947023	0.925306	0.854224	0.822765	0.820715	0.818676	0.816647	0.868841	0.928162
																																														1.08146	1.11257	1.14553	1.18723
						0.54651	0.554164	0.550771	0.565882	0.581267	0.66708	0.658394	0.649931	0.626072	0.603902	0.632929	0.601071	0.57484	0.568023	0.572683	0.560474	0.550122	0.577665	0.548074	0.547377	0.539325	0.566907	0.552296	0.576229	0.575167	0.572344	0.549754	0.583856	0.547671	0.557623	0.592313	0.631107	0.716763	0.710286	0.710811	0.685663	0.734486	0.720326	0.712659	0.701217	0.675431	0.692399	0.673715	0.660833
								2.1681	2.15533	2.14271	2.13024	2.05442	1.9838	1.91788	1.8562	1.79837	1.77675	1.75565	1.73505	1.71492	1.69525	1.67603	1.48058	1.50295	1.52601	1.54978	1.57431	1.59963	1.63942	1.37884	1.41471	1.50566	1.60911	1.61806	1.62711	1.62335	1.47441	1.85833	1.89866	1.94078	2.00256	2.65593	1.86008	2.25247	1.8872	1.93679	2.02686	1.80213	1.86927
																										0.686032	0.677993	0.686051	0.694303	0.702755	0.711416	0.720294	0.729395	0.73873	0.748307	0.753526	0.758819	0.764186	0.76963	0.775152	0.780754	0.786437	0.792204	0.798056	0.805188	0.812449	0.819842	0.82737	0.835038
																												3.7735	3.34398	3.46812	3.57857	3.69628	4.05671	4.49503	4.30998	4.13958	4.14874	3.97895	4.41864	4.34569	4.24602	4.40612	4.54561	4.62692	4.48894	4.38758	4.52552	4.91517	4.80855
Tx dosing: 200ngIns
1.33451	1.30209	1.31958	1.28004	1.23756	1.27955	1.27777	1.29681	1.3631	1.47661	1.44196	1.44731	1.36323	1.46514	1.21363	1.28038	1.22414	1.24946	1.3545	1.17569	1.2841	1.31129	1.27861	1.37426	1.393	1.43935	1.48722	1.4112	1.36511	1.3501	1.46236	1.51508	1.53559	1.55197	1.52455	1.50662	1.4324	1.4247	1.47368	1.61152	1.42168	1.30673	1.22907	1.2923	1.40148	1.40778	1.34642	1.33425	1.30255	1.26654
1.13286	1.1633	1.11402	1.14482	1.13228	1.14035	1.14645	1.10589	1.12019	1.10232	1.11001	1.12699	1.11372	1.11702	1.09404	1.08828	1.11182	1.09309	1.07578	1.0769	1.08646	1.09906	1.1027	1.07172	1.10097	1.12544	1.12482	1.08274	1.09208	1.07594	1.09325	1.08718	1.06751	1.08625	1.10315	1.09185	1.10311	1.11388	1.13461	1.15664	1.15677	1.14138	1.15653	1.17545	1.15198	1.1842	1.15863	1.20166	1.18677	1.17823
0.901749	0.931595	0.932017	1.0785	0.915946	0.912249	0.931773	0.957469	0.922391	0.917858	0.882674	0.93488	0.904681	0.938775	0.879484	0.9391	0.886802	0.88795	0.883736	0.854016	0.895612	0.77338	0.839038	0.820971	0.912245	0.886881	0.81774	0.873051	1.03954	0.834236	0.82301	0.784838	0.898801	0.909784	0.829288	0.930746	0.809218	0.822269	0.822031	0.815094	0.80493	0.788154	0.854856	0.800179	0.790658	0.739484	0.76793	0.796645	0.727192	0.744108
0.726089	0.704045	0.700226	0.71547	0.722859	0.733819	0.725519	0.726341	0.717543	0.734076	0.716174	0.75548	0.720488	0.740679	0.783679	0.731817	0.771807	0.72234	0.730597	0.72967	0.716872	0.711712	0.751657	0.766262	0.695203	0.774194	0.752192	0.702698	0.710212	0.766629	0.713814	0.777625	0.757649	0.775508	0.760079	0.747882	0.715834	0.713331	0.680084	0.678632	0.656401	0.667371	0.645797	0.623308	0.637238	0.632988	0.635916	0.60637	0.582882	0.609284
0.724263	0.724982	0.738263	0.735393	0.727967	0.738777	0.730535	0.73452	0.728803	0.724597	0.729972	0.727129	0.713654	0.712493	0.704314	0.716971	0.703911	0.721207	0.706027	0.701743	0.694875	0.694046	0.672351	0.685126	0.680863	0.694801	0.683835	0.682881	0.687827	0.677442	0.674655	0.683055	0.678035	0.687905	0.688181	0.689262	0.705687	0.710991	0.718235	0.722014	0.724482	0.736125	0.720327	0.730648	0.728587	0.745156	0.738317	0.748876	0.758692	0.770423
0.530991	0.552543	0.546062	0.571179	0.565308	0.572813	0.560974	0.565054	0.570393	0.583414	0.583331	0.600181	0.589921	0.59489	0.603407	0.608615	0.603048	0.601096	0.588218	0.590816	0.62212	0.605084	0.621721	0.630758	0.609937	0.625864	0.639782	0.630559	0.630611	0.642607	0.642026	0.682518	0.672972	0.679937	0.650632	0.699314	0.681445	0.675313	0.703771	0.727044	0.709666	0.694797	0.709374	0.723564	0.663214	0.701895	0.714104	0.682319	0.724659	0.697323
0.681812	0.640526	0.635773	0.639051	0.648348	0.629831	0.647561	0.632645	0.640839	0.636638	0.627329	0.617997	0.626148	0.628877	0.63188	0.623126	0.61603	0.617329	0.610333	0.618028	0.621589	0.634378	0.619668	0.611669	0.610414	0.619081	0.615569	0.628653	0.642881	0.629735	0.622213	0.651501	0.632335	0.68124	0.686844	0.653399	0.713449	0.718108	0.722515	0.723342	0.733645	0.721542	0.710797	0.712824	0.702417	0.702143	0.675027	0.677693	0.683434	0.676878
1.09175	1.15655	1.17733	0.992381	0.805026	0.84929	0.898704	0.954224	0.993496	0.897602	0.867237	0.838859	0.869539	0.902549	0.938165	0.995899	1.00865	0.856248	0.927828	1.01247	1.1141	1.41816	1.01202	0.786716	0.809055	0.922994	1.07429	1.12617	1.0916	1.0591	1.02847	1.18655	1.06082	1.01683	1.33333	1.42736	1.196	1.09269	0.865424	0.858558	0.868757	0.879202	0.889902	0.900865	0.876995	0.92292	1.13976	1.04861	0.970965	0.900377
1.44418	1.47372	1.46416	1.4322	1.31772	1.56602	1.46832	1.37091	1.55383	1.53266	1.41246	1.24132	1.52466	1.29216	1.43559	1.43809	1.27641	1.55843	1.43721	1.43508	1.54426	1.35159	1.60992	1.64916	1.61986	1.58532	1.48711	1.42579	1.46406	1.46326	1.53159	1.59379	1.68294	1.57668	1.78206	1.76517	1.55461	1.89064	1.86081	1.78689	1.5796	1.68294	1.67567	1.74526	1.75683	1.99338	1.90797	1.64833	1.85023	1.74022
0.764737	0.777328	0.775829	0.782317	0.730434	0.711521	0.735449	0.727139	0.755107	0.713266	0.736419	0.761342	0.733087	0.739508	0.748426	0.710267	0.709663	0.691207	0.681467	0.681167	0.684701	0.677781	0.660234	0.662249	0.671667	0.685854	0.644681	0.637881	0.689496	0.673186	0.664963	0.656074	0.687735	0.666922	0.70093	0.704521	0.707301	0.699497	0.697711	0.686135	0.73146	0.700287	0.725682	0.731112	0.736586	0.739346	0.710721	0.720561	0.738484	0.739225
1.03202	1.06457	0.999418	1.03305	1.03069	1.08936	1.02576	1.06427	1.08112	1.03605	1.07666	1.08981	1.04711	1.07049	1.10302	1.07928	1.13583	1.20045	1.21524	1.11831	1.11316	1.06473	1.06726	1.05924	1.02234	1.08908	1.09318	1.05682	1.0606	1.04486	1.05349	1.06679	1.03549	1.09891	1.08251	1.07705	1.11104	1.12799	1.07054	1.15654	1.19114	1.21903	1.23627	1.22076	1.21236	1.23255	1.24467	1.29052	1.14577	1.29692
0.668787	0.660281	0.653102	0.662827	0.666735	0.663947	0.670812	0.646339	0.656676	0.659587	0.646793	0.6434	0.643284	0.633889	0.64633	0.645314	0.650909	0.646318	0.647777	0.689178	0.677609	0.647211	0.669731	0.662432	0.642624	0.669076	0.659161	0.66234	0.645094	0.650517	0.650891	0.668866	0.67162	0.675822	0.651088	0.668162	0.659272	0.659951	0.676922	0.68308	0.693505	0.693026	0.712657	0.721294	0.706444	0.706406	0.711123	0.730483	0.721705	0.726475
2.59182	2.46616	2.45527	2.71905	2.76042	2.52689	2.19986	2.21087	2.08518	2.07361	1.91628	1.61463	1.84766	1.60765	1.66847	1.82092	1.52499	1.76281	2.08852	2.56186	3.31264	1.99009	1.42226	1.10654	0.905521	0.766312	0.690716	0.811018	0.732003	0.770029	0.69294	0.629881	0.683835	0.747897	0.825203	0.825638	0.788632	0.902048	0.837089	0.780856	0.819542	1.21676	2.36117	0.982829	0.620569	0.747413	0.939432	1.26422	1.10602	1.00949
1.01679	1.03144	1.04308	1.02723	1.04972	1.03482	1.04886	1.03692	1.03388	1.05423	1.04833	1.04805	1.0538	1.06273	1.01258	1.02114	0.973814	1.00209	0.984493	0.999993	0.980694	0.987885	1.01401	1.03436	1.04743	1.06721	1.14873	1.1037	1.10451	1.07792	1.11542	1.14116	1.16647	1.19485	1.1818	1.14507	1.14179	1.1514	1.16715	1.12789	1.20134	1.13708	1.18575	1.18585	1.18033	1.17056	1.13122	1.14915	1.1524	1.1608
2.30897	2.65389	2.09401	2.33507	2.33066	2.05318	2.39867	1.97051	1.6508	2.10505	1.75645	1.57355	1.34152	1.26876	1.47363	1.7574	1.73414	1.63077	1.68298	1.21897	1.55541	1.75684	1.53214	1.35841	1.5436	1.49635	1.66575	1.87841	1.68541	2.01434	1.59732	2.33438	2.05694	2.6689	3.42697	2.2237	1.64098	1.70864	1.72444	2.07433	1.58491	1.67158	1.98988	1.84951	1.74024	1.90849	1.66104	1.97494	1.98604	2.67001
0.817129	0.813737	0.838191	0.817269	0.809992	0.831453	0.836436	0.839185	0.855263	0.850235	0.852104	0.839249	0.83553	0.829428	0.80697	0.825739	0.810929	0.800659	0.775491	0.784631	0.771289	0.753867	0.774566	0.779838	0.768583	0.774026	0.785302	0.776658	0.771474	0.774796	0.770442	0.767294	0.738952	0.747941	0.74756	0.754057	0.748797	0.767823	0.784484	0.767206	0.778138	0.784783	0.802029	0.807865	0.783681	0.801396	0.822903	0.808109	0.824982	0.802144
0.548692	0.603836	0.567377	0.589332	0.59788	0.619861	0.61045	0.678909	0.598163	0.614719	0.606473	0.661906	0.585339	0.608995	0.621404	0.615363	0.608539	0.595408	0.609115	0.614334	0.578083	0.60389	0.600546	0.54635	0.598604	0.592445	0.568287	0.536391	0.552291	0.58622	0.583673	0.573136	0.56246	0.579072	0.59726	0.578094	0.567104	0.599096	0.602813	0.598828	0.608599	0.618578	0.590116	0.587679	0.586493	0.564533	0.580624	0.576771	0.603814	0.600344
2.23678	2.18341	2.35498	2.17988	2.2283	2.21	2.16025	2.10747	2.06179	2.0698	1.82529	1.96395	1.95832	1.81959	1.77255	1.6997	1.83801	1.84802	1.79074	1.85553	1.77594	1.68282	1.82373	1.75378	1.87031	1.84156	1.93484	1.85199	1.706	1.71154	1.65915	1.89157	1.77807	1.85842	1.80696	1.77111	1.57933	1.53573	1.55412	1.47364	1.46214	1.41019	1.42651	1.42649	1.32831	1.40653	1.39589	1.20891	1.28163	1.34362
0.57254	0.574909	0.592034	0.583032	0.56176	0.551698	0.583718	0.56609	0.541328	0.521967	0.531923	0.519759	0.537835	0.506833	0.507167	0.507502	0.507837	0.509818	0.512076	0.514354	0.516652	0.518972	0.521312	0.513266	0.505466	0.512101	0.526963	0.518527	0.520286	0.510501	0.526811	0.525976	0.521501	0.520999	0.526836	0.515518	0.528351	0.519284	0.527867	0.516375	0.541709	0.530084	0.514693	0.538501	0.528951	0.546398	0.539578	0.534275	0.538338	0.514226
0.744149	0.721477	0.710082	0.683606	0.665755	0.700824	0.688925	0.650461	0.716927	0.68418	0.658029	0.620871	0.63027	0.623208	0.642826	0.605556	0.606952	0.611636	0.617738	0.617808	0.616403	0.629768	0.634499	0.651072	0.633122	0.642058	0.622922	0.638547	0.646007	0.653482	0.602809	0.654526	0.71595	0.669316	0.670968	0.599465	0.64779	0.651325	0.651131	0.67234	0.659892	0.653617	0.682346	0.679154	0.635602	0.641565	0.651064	0.637501	0.651755	0.658892
1.02831	1.04988	1.06475	1.03153	1.06056	1.05399	1.0792	1.04896	1.10852	1.0795	1.06036	1.11248	1.05364	1.01588	1.08359	1.08214	1.00516	1.02757	1.01082	1.00531	1.02771	0.993125	0.974604	0.944166	0.984484	1.01439	1.01465	1.04544	0.984871	0.968972	0.920627	0.967447	0.972354	0.986573	1.00988	1.04615	0.983993	0.979303	0.979271	0.951984	0.982315	0.970718	0.978317	0.955756	1.00585	0.965414	0.974828	0.978107	0.988622	0.961466
0.769509	0.786734	0.78942	0.796984	0.794118	0.814222	0.798561	0.815897	0.799311	0.824645	0.794143	0.813711	0.807427	0.817586	0.826366	0.831631	0.82453	0.829683	0.846533	0.828891	0.847783	0.836846	0.842061	0.827734	0.839228	0.841933	0.852188	0.842529	0.841694	0.847228	0.853779	0.865952	0.896382	0.899851	0.898047	0.920561	0.928332	0.965584	0.94493	0.936983	0.949093	0.936355	0.956601	0.944151	0.910658	0.932342	0.918493	0.911876	0.908325	0.88684
1.16793	1.107	1.12326	1.19416	1.18476	1.18053	1.15616	1.1535	1.15391	1.17414	1.18204	1.19048	1.15338	1.13507	1.2043	1.16193	1.20345	1.21719	1.1307	1.11633	1.20105	1.10052	1.16639	1.15453	1.20356	1.09881	1.0951	1.04067	1.07459	1.08834	1.17945	1.06566	1.06019	1.04171	1.12098	1.22557	1.13748	1.20689	1.15638	1.09573	1.05248	1.07288	1.0256	0.97569	0.989495	1.1517	1.02712	1.04737	1.0058	0.967405
				0.507155	0.512216	0.523359	0.504528	0.507417	0.529105	0.525931	0.538312	0.544004	0.522879	0.515819	0.539338	0.559202	0.572966	0.548564	0.534486	0.544935	0.555153	0.552176	0.576988	0.558431	0.546199	0.575443	0.570954	0.576355	0.572084	0.562027	0.598275	0.622348	0.62034	0.601159	0.588188	0.607849	0.584761	0.600189	0.625264	0.642862	0.635713	0.633906	0.662542	0.682801	0.704338	0.652147	0.686637	0.675837	0.687694
1.52944	1.44483	1.47099	1.46036	1.40228	1.49574	1.41492	1.43927	1.46447	1.47974	1.54038	1.52623	1.45112	1.46377	1.42552	1.53072	1.465	1.44677	1.51736	1.43378	1.46193	1.41253	1.43727	1.42928	1.42138	1.53796	1.46721	1.40268	1.45896	1.4906	1.45866	1.42781	1.50066	1.60083	1.45228	1.43836	1.44111	1.42911	1.363	1.47959	1.44261	1.45925	1.50109	1.41786	1.45731	1.49638	1.5501	1.51093	1.63594	1.57466
0.936715	0.948838	0.941241	0.928972	0.969674	0.934767	1.03392	0.929022	0.935446	0.941065	0.962762	0.954758	0.941358	0.964152	0.961906	0.993587	1.01965	1.22088	0.986768	0.948273	0.969913	0.961318	0.911058	0.918917	0.894784	0.880051	0.92466	0.907939	0.924092	0.912002	0.942247	0.982599	0.974062	0.985861	0.946976	0.897061	0.90139	0.892979	0.884725	0.956296	0.944421	0.897961	0.925931	0.900435	0.939256	0.879151	0.867252	0.899135	0.922819	0.871529
																																				0.504728	0.506173	0.507108	0.505279	0.503463	0.50166	0.504905	0.503445	0.50194	0.502809	0.50272	0.502631	0.502542	0.502469
0.722189	0.727172	0.732223	0.742326	0.774786	0.723161	0.744579	0.73667	0.737822	0.737978	0.743877	0.742357	0.726672	0.756641	0.732622	0.736398	0.763296	0.737116	0.729948	0.7241	0.733482	0.751301	0.753127	0.766537	0.759755	0.722335	0.737943	0.748214	0.714068	0.75442	0.733541	0.732966	0.717603	0.768065	0.740428	0.721528	0.750413	0.74682	0.733694	0.740483	0.745856	0.748869	0.764198	0.721826	0.741012	0.758981	0.75507	0.75369	0.75403	0.749977
0.984484	1.01875	1.05021	1.05585	1.04625	1.10803	1.05319	1.16692	1.1129	1.11566	1.09395	1.14855	1.10678	1.15127	1.13109	1.1116	1.11236	1.11312	1.10722	1.08057	1.05517	1.13213	1.07346	1.10194	1.03489	1.06239	1.09139	1.04699	1.0505	1.0018	0.957409	1.04631	1.13467	1.08203	1.05405	1.07948	1.2035	1.14572	1.21799	1.14625	1.10974	1.12345	1.12717	1.17296	1.16647	1.14531	1.1657	1.19036	1.16372	1.12192
0.895428	0.859711	0.879339	0.885224	0.818141	0.836486	0.851828	0.852639	0.857096	0.841561	0.864347	0.857681	0.819786	0.849246	0.837551	0.862238	0.82222	0.833868	0.806229	0.817997	0.831653	0.807146	0.834769	0.817763	0.801436	0.801988	0.815472	0.796532	0.768953	0.74322	0.772089	0.788247	0.818996	0.791837	0.790443	0.807659	0.774286	0.743561	0.755637	0.768112	0.813827	0.756376	0.793661	0.799963	0.812756	0.825964	0.756226	0.759953	0.752636	0.745459
2.54081	2.69345	2.41865	2.28949	2.46292	2.34606	2.242	2.28138	2.32134	2.12783	2.2385	2.29221	2.31226	1.79717	2.28329	2.00772	2.22731	2.43519	2.30677	1.68697	1.80461	1.93989	1.841	1.94335	1.98129	2.20959	2.47293	1.92586	1.9677	2.01139	1.90414	2.08926	2.31424	2.1989	2.79464	2.30903	2.36239	1.83938	1.89851	1.90964	1.92091	1.75007	2.38875	2.00478	2.50151	2.55797	2.86875	2.91127	2.56533	2.34471
1.13513	1.12377	1.14436	1.14155	1.15581	1.17564	1.15143	1.16517	1.13634	1.16283	1.17484	1.19475	1.13864	1.19708	1.19933	1.16288	1.17801	1.16571	1.16401	1.16818	1.17396	1.16824	1.16111	1.17443	1.16949	1.16289	1.13234	1.15804	1.16062	1.15743	1.1407	1.15103	1.16235	1.15258	1.15245	1.19443	1.21908	1.2023	1.20653	1.18745	1.16004	1.15594	1.14027	1.11063	1.09614	1.1147	1.09625	1.05062	1.07341	1.04839
1.30627	1.25017	1.27344	1.24195	1.21653	1.18831	1.1971	1.23786	1.23228	1.18891	1.13582	1.15436	1.15061	1.09234	1.04355	1.05319	1.063	1.08591	1.0655	1.0659	1.04499	1.05565	1.10542	1.04363	1.04245	1.01439	0.974369	0.950816	1.04015	1.01468	0.969377	1.03442	1.04712	1.03523	1.04815	1.06661	1.08573	1.10567	1.10193	1.09206	1.16566	1.09037	1.05841	1.04222	1.00323	1.03983	1.08254	1.02664	1.00068	1.0389
0.568012	0.59231	0.563858	0.553388	0.57504	0.573383	0.565416	0.564995	0.558552	0.561645	0.549143	0.565384	0.532909	0.546406	0.542058	0.555848	0.559955	0.553651	0.532448	0.530355	0.528277	0.588418	0.588759	0.548765	0.52623	0.508707	0.531911	0.528038	0.528329	0.509013	0.524628	0.503292	0.521462	0.540992	0.541821	0.542653	0.576144	0.549693	0.536525	0.551852	0.560475	0.542496	0.541875	0.550962	0.560359	0.556722	0.543705	0.558839	0.56352	0.543419
0.66946	0.77805	0.677114	0.599359	0.580183	0.562195	0.553277	0.563285	0.573661	0.584427	0.595604	0.526672	0.514831	0.5212	0.530825	0.515382	0.520708	0.506265	0.556472	0.519053	0.535645	0.561582	0.556344	0.565154	0.529072	0.535931	0.564919	0.527084	0.529384	0.531705	0.534047	0.536409	0.538792	0.526819	0.518332	0.537927	0.577014	0.553333	0.531519	0.58797	0.657837	0.594528	0.603207	0.610595	0.611735	0.612879	0.680654	0.750936	0.76738	0.778884
2.7587	2.68278	2.71002	2.73948	2.59068	2.45567	2.49507	2.38969	2.50263	2.43533	2.44046	2.4267	2.27887	2.52638	2.18796	2.47658	2.48112	2.25116	2.17756	2.43773	2.29474	2.16446	2.39804	2.18003	2.11056	2.12296	2.13327	1.88941	1.96755	2.05385	1.90072	1.86705	1.88695	1.93386	1.75062	1.76347	1.96091	1.76612	1.93635	2.07341	1.81669	1.85223	1.64753	1.55428	1.65691	1.51993	1.39787	1.69225	1.60637	2.16489
0.881789	0.900036	0.87067	0.857112	0.836872	0.859292	0.825157	0.867542	0.892604	0.882223	0.820315	0.857169	0.86655	0.871034	0.813057	0.81645	0.862119	0.819095	0.819973	0.838203	0.795476	0.810768	0.86836	0.834709	0.839825	0.918034	0.859556	0.833671	0.83529	0.859743	0.818031	0.811352	0.794969	0.829587	0.811454	0.794097	0.770808	0.774505	0.770411	0.755803	0.741739	0.700019	0.701486	0.773551	0.771349	0.767056	0.74641	0.720407	0.696155	0.673483
0.652499	0.639691	0.654512	0.666888	0.680377	0.661036	0.680542	0.654913	0.660965	0.672927	0.660463	0.670524	0.674597	0.685628	0.670099	0.653804	0.648723	0.6766	0.663277	0.661657	0.659916	0.668901	0.642992	0.675429	0.653884	0.669543	0.669577	0.669611	0.653298	0.674634	0.670476	0.708345	0.695135	0.695548	0.695963	0.683295	0.701633	0.692191	0.698937	0.722869	0.69106	0.679944	0.675207	0.674855	0.703794	0.649339	0.675258	0.680831	0.649965	0.636757
0.568864	0.548651	0.63291	0.583818	0.59026	0.596846	0.616701	0.610871	0.607004	0.647064	0.592704	0.652998	0.600406	0.629734	0.620009	0.66323	0.59256	0.694842	0.615115	0.614035	0.656725	0.637701	0.654101	0.622678	0.660379	0.611114	0.644806	0.645191	0.645576	0.656613	0.668313	0.673515	0.667886	0.724862	0.718336	0.732584	0.747408	0.777516	0.704148	0.749361	0.770301	0.757652	0.779155	0.781619	0.784372	0.780834	0.778501	0.757432	0.767392	0.749711
1.32431	1.12511	1.29925	1.40264	1.85477	1.67595	1.75964	1.55894	1.64682	1.54804	1.78752	1.86434	1.55524	1.94738	1.99286	1.96731	1.94007	2.08423	1.77747	1.81858	2.20419	1.88509	1.93983	1.71647	1.97643	2.05719	2.08749	1.93099	1.83827	1.87474	1.85752	1.94867	1.80384	2.35627	1.66658	1.70173	1.66513	1.7658	1.95571	1.82216	1.79254	1.89279	2.10532	2.1198	2.01008	2.30674	2.13864	2.03899	1.946	2.06997
0.964262	0.996535	1.04532	1.03428	1.00144	1.04009	1.0817	1.03965	1.01226	1.09436	1.08021	0.987479	1.00134	1.02885	1.06417	0.953579	1.04166	1.01292	0.979566	1.03614	1.00863	1.0119	0.984998	1.1037	0.994987	1.03321	1.05506	1.10358	1.11018	1.12086	1.14025	1.19838	1.11134	1.13275	1.22912	1.01445	1.10162	0.957873	0.986134	1.00752	1.00689	1.02873	1.01801	1.02629	1.0329	1.0565	1.04532	1.03751	1.0607	1.03698
	0.517495	0.528174	0.510901	0.512484	0.511175	0.522338	0.504876	0.524872	0.532399	0.52943	0.528379	0.552585	0.548924	0.533951	0.553195	0.551436	0.537092	0.535195	0.535227	0.557183	0.550808	0.558367	0.574481	0.557547	0.553458	0.556905	0.558587	0.55721	0.569568	0.548977	0.554733	0.580598	0.585325	0.589819	0.574869	0.573904	0.59481	0.604187	0.612781	0.62333	0.63241	0.642625	0.616398	0.622918	0.620229	0.62813	0.612514	0.594018	0.58492
0.658094	0.668914	0.67681	0.695617	0.673382	0.675753	0.674476	0.6577	0.668382	0.668512	0.615923	0.632212	0.646874	0.633157	0.632561	0.623088	0.570446	0.612574	0.628148	0.649359	0.623717	0.62187	0.625764	0.673582	0.638211	0.65842	0.627973	0.680849	0.642957	0.658867	0.668308	0.678024	0.652148	0.655419	0.670716	0.675728	0.716447	0.656114	0.701015	0.713893	0.667833	0.697665	0.683603	0.749328	0.663741	0.777719	0.659858	0.672949	0.672616	0.713024
0.712392	0.714848	0.732066	0.735431	0.728135	0.74739	0.728169	0.729217	0.707278	0.719468	0.720241	0.706203	0.732047	0.73178	0.731835	0.726528	0.724641	0.701247	0.717626	0.714673	0.700942	0.70712	0.7305	0.724235	0.721342	0.713645	0.724303	0.718032	0.724269	0.728975	0.734201	0.69226	0.695078	0.683942	0.656965	0.61856	0.621651	0.613096	0.589819	0.637076	0.576812	0.615044	0.617026	0.600313	0.596385	0.648	0.647334	0.663555	0.642151	0.598075
2.70943	2.43047	2.44177	2.36635	2.66699	2.74779	2.73749	2.64389	2.41958	2.23036	2.29334	2.37722	2.29487	2.36731	2.44446	2.52682	2.54099	2.55532	2.56981	2.58447	2.56618	2.64382	2.72631	2.7848	2.99757	2.78036	2.78157	2.76748	2.75354	2.73973	2.72606	2.71253	2.86928	3.04526	2.93904	2.83998	2.74739	2.66064	2.43556	2.48482	2.00245	2.05524	1.85905	2.03296	1.81555	1.75961	1.64608	1.67213	1.66876	1.50582
4.09935	3.92995	4.08223	4.578	3.9517	4.33974	3.6738	4.60725	4.05651	3.2363	3.56764	4.10444	4.29986	3.75232	4.82293	4.80276	3.70953	4.38276	4.62809	5.27272	5.16463	5.36893	5.35286	5.50482	5.0628	5.46482	5.30101	5.39884	5.66338	5.37265	4.61318	6.13491	5.42578	5.3707	5.56496	5.01804	4.82841	5.36811	5.18811	5.20116	4.90411	5.5436	5.7331	5.71126	5.82791	5.62288	5.40953	5.02479	5.68813	5.51551
6.18979	5.68647	6.46901	6.22432	5.97949	6.07535	6.21879	6.26639	6.50014	6.37629	6.12985	6.08798	6.16391	6.51004	6.51516	6.26596	6.57911	6.66472	6.40802	6.22615	6.30652	6.24204	6.16691	5.97466	6.42249	6.1684	6.14151	5.99776	6.44399	6.15734	6.46555	6.47571	6.30982	6.29506	6.5363	6.19414	6.3036	5.85627	5.84726	5.84356	6.13593	6.09417	6.03201	5.82491	6.43352	6.59436	6.93451	6.59454	6.28364	6.33071
3.36709	3.32183	3.19202	3.10443	2.95139	3.18925	3.23721	3.06266	3.01424	3.17516	3.06619	2.9563	3.12048	3.01583	2.81048	2.89859	2.70819	2.58164	2.55261	2.32446	2.52267	2.41575	2.42556	2.45901	2.5098	2.44756	2.39931	2.44588	2.48196	2.38177	2.49294	2.46073	2.50295	2.47046	2.49155	2.47744	2.34485	2.32127	2.4261	2.41839	2.35673	2.31368	2.40695	2.43021	2.38644	2.21826	2.26233	2.26004	2.38527	2.36328
1.43823	1.3884	1.39723	1.34822	1.24415	1.33444	1.32439	1.3145	1.20705	1.1509	1.05494	1.26856	1.26476	1.24217	1.22037	1.1626	1.22157	1.12119	1.03492	1.25957	1.0546	0.906998	0.795642	0.70864	0.777082	0.860158	0.743756	0.711713	0.797168	0.905944	0.755582	0.882704	1.06125	1.02487	1.07858	1.05502	1.06966	1.08471	1.10019	1.11612	1.11691	1.11771	1.11043	1.15869	1.06767	1.04034	1.01437	0.989661	0.996973	0.991956
1.83765	1.76506	1.72068	1.66537	1.74319	1.6592	1.68205	1.65031	1.56676	1.61579	1.71383	1.6212	1.67937	1.56712	1.58703	1.67453	1.64509	1.63694	1.57516	1.5522	1.56109	1.54656	1.49056	1.45998	1.52468	1.57744	1.44984	1.52972	1.5674	1.51039	1.481	1.36772	1.28547	1.28159	1.42476	1.54468	1.3759	1.53193	1.48407	1.57351	1.66607	1.61389	1.56488	1.60777	1.59394	1.64897	1.50245	1.44165	1.38083	1.37048
1.17315	1.22421	1.21266	1.19917	1.20185	1.22763	1.17753	1.25372	1.24761	1.25453	1.19051	1.2684	1.25137	1.23244	1.2554	1.23786	1.23146	1.19982	1.22007	1.21239	1.25411	1.2259	1.24676	1.25449	1.21965	1.1892	1.13835	1.16492	1.1983	1.15239	1.10717	1.1542	1.16723	1.14179	1.14902	1.15717	1.1834	1.20715	1.21187	1.23707	1.18089	1.14609	1.21811	1.18882	1.18714	1.18547	1.1838	1.18213	1.18047	1.16816
0.882531	0.888302	0.832209	0.863387	0.826639	0.845295	0.811991	0.770977	0.795953	0.808884	0.804358	0.799883	0.795457	0.79108	0.786751	0.785531	0.784315	0.77068	0.757511	0.744784	0.732478	0.720573	0.728919	0.737461	0.746206	0.755161	0.764333	0.77373	0.76954	0.765396	0.761295	0.757239	0.75074	0.744351	0.738071	0.731895	0.748391	0.730765	0.716754	0.716643	0.724299	0.732567	0.710053	0.702136	0.72355	0.697828	0.679615	0.693465	0.71074	0.67517
0.718894	0.729138	0.723009	0.765535	0.769901	0.752037	0.756853	0.787277	0.783863	0.765281	0.770763	0.794357	0.764906	0.759695	0.754625	0.754123	0.777272	0.769765	0.782319	0.79243	0.786145	0.775204	0.763525	0.783127	0.788801	0.785669	0.777846	0.779085	0.770044	0.785385	0.774382	0.802653	0.812764	0.806121	0.797218	0.766619	0.774483	0.790475	0.784831	0.786991	0.792182	0.790244	0.765432	0.749464	0.753942	0.753261	0.737229	0.762272	0.720515	0.721424
1.10472	1.04789	1.07637	1.08171	1.05652	1.05217	1.08717	1.03628	1.0358	1.05516	1.06539	1.07538	1.05764	1.0502	1.04143	1.03438	1.02346	1.02429	1.01979	1.02016	0.99656	0.987208	1.03547	0.993902	1.00635	1.00285	0.978302	0.975943	1.00389	0.99369	0.970612	1.01344	1.02584	0.998349	0.984959	1.0387	1.02756	1.02488	1.04461	1.04539	1.02676	1.05089	1.0273	1.0433	1.08519	1.06545	1.07554	1.03611	1.0245	1.02218
0.721886	0.721092	0.742355	0.764725	0.76033	0.757795	0.770522	0.757177	0.742134	0.748918	0.72614	0.744981	0.729448	0.708267	0.696054	0.707679	0.703077	0.737651	0.71893	0.729383	0.721555	0.699536	0.729104	0.739284	0.720267	0.700345	0.702195	0.706954	0.704336	0.714239	0.736874	0.706776	0.731322	0.723825	0.743074	0.746777	0.732758	0.76122	0.733582	0.713	0.705976	0.680829	0.672716	0.65781	0.618135	0.60902	0.604059	0.579706	0.564484	0.546871
1.35241	1.30624	1.38833	1.36416	1.50275	1.34151	1.3076	1.30497	1.30194	1.31452	1.29415	1.33093	1.26788	1.29533	1.2726	1.29587	1.28438	1.15294	1.24981	1.23981	1.29801	1.24733	1.27127	1.25209	1.30207	1.19399	1.33262	1.31232	1.31424	1.25999	1.34893	1.29662	1.15519	1.25682	1.34626	1.33866	1.39521	1.40689	1.40529	1.40369	1.4021	1.40051	1.39892	1.39734	1.43921	1.5253	1.47662	1.43096	1.33913	1.59465
0.632861	0.632343	0.637627	0.614006	0.634556	0.645368	0.657577	0.651826	0.660662	0.663455	0.670119	0.673183	0.659722	0.691338	0.651736	0.661359	0.663951	0.657551	0.654068	0.680087	0.674245	0.687673	0.707359	0.684046	0.723718	0.697297	0.693031	0.783464	0.901041	1.0576	1.27999	1.14816	1.24976	1.31336	1.46933	1.44664	1.35276	1.25607	1.44002	1.15629	0.965972	0.873763	0.846751	0.734968	0.649256	0.666114	0.686982	0.667824	0.704571	0.706653
0.698867	0.697154	0.702415	0.718917	0.713811	0.698636	0.698828	0.696418	0.709414	0.698016	0.685953	0.674657	0.693895	0.673019	0.69323	0.691341	0.685303	0.697514	0.701416	0.683902	0.692663	0.691487	0.693064	0.70091	0.697892	0.710896	0.690482	0.682308	0.678254	0.676973	0.677767	0.676118	0.690197	0.676648	0.673585	0.663996	0.65899	0.657643	0.650882	0.647394	0.627746	0.634993	0.627199	0.61837	0.615612	0.624114	0.608235	0.615011	0.611273	0.611528
0.501609	0.516389	0.51637	0.516351	0.516331	0.516312	0.512145	0.512401	0.512658	0.550198	0.538578	0.513272	0.514744	0.516225	0.535015	0.513636	0.518364	0.52783	0.544777	0.518118	0.523548	0.519242	0.52936	0.552085	0.553993	0.544251	0.520175	0.518002	0.515847	0.539595	0.530626	0.521951	0.513554	0.500388	0.544817	0.5288	0.513698	0.512967	0.512239	0.529398	0.52196	0.520087	0.518228	0.528574	0.521874	0.519788	0.517945	0.516115	0.514298	0.512493
3.30095	3.49013	3.20965	2.9163	3.25389	3.10986	2.53663	2.98042	3.61242	3.17615	2.83391	2.63838	3.22462	2.85257	2.89009	2.98851	3.25886	3.09683	3.34571	3.08445	2.97339	2.70001	2.1523	2.66682	2.48387	2.11938	2.17792	2.12837	2.08103	2.20109	2.05495	2.11626	2.03787	2.53024	1.98934	1.9007	1.81962	1.74517	2.61208	2.36168	2.6721	3.04596	2.60716	2.76158	2.93544	2.73896	3.42419	3.20059	3.74067	2.39682
0.54792	0.523538	0.530687	0.525109	0.518476	0.515395	0.509011	0.513413	0.517892	0.515804	0.562101	0.532118	0.523073	0.544878	0.565778	0.54	0.522131	0.554595	0.566174	0.527046	0.538327	0.537717	0.56404	0.517685	0.545459	0.561378	0.557198	0.541784	0.560937	0.571132	0.56679	0.564739	0.576803	0.576169	0.578658	0.590298	0.601958	0.605817	0.595172	0.620275	0.634932	0.634841	0.62388	0.642095	0.642515	0.644575	0.663199	0.653868	0.671011	0.673695
0.759195	0.714853	0.719909	0.727545	0.74893	0.753139	0.707335	0.76821	0.753949	0.733053	0.739385	0.718805	0.73195	0.71457	0.676559	0.682357	0.716766	0.690992	0.686972	0.699058	0.68047	0.667562	0.641448	0.646087	0.661747	0.645248	0.617552	0.630975	0.607848	0.624063	0.641662	0.639005	0.604665	0.63497	0.621731	0.621501	0.642476	0.642793	0.682352	0.722633	0.743812	0.745282	0.72932	0.714013	0.721161	0.727573	0.738506	0.730874	0.727722	0.744761
1.67923	1.63537	1.80827	1.50357	1.509	1.7413	1.82125	1.72441	1.44593	1.7773	1.73894	1.73382	1.86093	1.78659	1.76796	1.69935	1.69899	1.79508	1.54751	1.81185	1.75348	1.8643	1.68378	1.92867	1.98297	1.98311	2.16735	2.24879	2.29968	2.17834	2.06625	2.20026	2.12493	2.05626	2.06386	1.92981	2.28089	2.07495	2.01931	2.10429	1.87423	1.78494	1.79161	1.57761	1.7427	1.44742	1.57332	1.5332	1.52071	1.40993
1.12781	1.11149	1.16425	1.11223	1.13659	1.09079	1.10529	1.13281	1.08628	1.0902	1.0217	1.03109	1.06514	1.06824	1.04854	1.02446	1.01952	1.04504	1.03759	1.04028	0.997078	0.99375	0.994388	1.00909	1.01642	1.02387	1.00652	1.01436	0.992277	1.0067	0.977165	1.02626	1.03524	1.04248	1.00658	1.03929	1.04352	1.00371	1.05102	1.07544	1.03489	0.996232	0.991746	1.0548	1.0244	0.949355	0.96567	0.93525	0.935489	0.947077
0.70108	0.69946	0.724419	0.683096	0.689644	0.681278	0.682538	0.640882	0.61516	0.646405	0.635253	0.65834	0.643961	0.658561	0.636619	0.639441	0.671261	0.666696	0.649979	0.646852	0.653204	0.623338	0.600287	0.632568	0.62114	0.666158	0.648819	0.662274	0.634568	0.644823	0.603431	0.603669	0.599971	0.607169	0.587767	0.606115	0.588891	0.573595	0.564443	0.571354	0.546982	0.534058	0.540157	0.532771	0.533027	0.550473	0.561998	0.541493	0.557864	0.554622
0.924402	1.13308	1.17091	1.13765	1.1775	1.1593	1.14165	1.12454	1.11872	1.08298	1.08245	1.05105	0.975914	0.979132	1.03275	0.867436	0.94481	0.937715	0.812905	0.830016	0.847864	0.963832	0.918025	0.911031	0.904143	0.933882	0.968456	1.00569	1.0459	1.08946	1.1368	1.04759	1.00913	0.97339	1.02107	1.15343	1.27295	1.19411	1.26273	1.26873	1.5932	1.34084	1.46948	1.58876	1.72913	1.89669	2.01901	2.09776	1.78097	1.54731
1.01554	1.00619	1.09182	1.07535	1.08681	1.02922	1.04314	1.08365	1.09394	1.10443	1.08087	1.08647	1.04491	1.07237	1.08131	1.08448	1.07697	1.06423	1.04632	0.988963	0.966723	1.0307	1.06559	1.05731	0.999912	0.964194	1.00262	1.08234	1.09161	1.11895	1.08504	1.11573	1.12649	1.10996	1.16168	1.17022	1.20453	1.21281	1.22683	1.2032	1.20293	1.21215	1.0964	1.07377	1.0237	1.12648	1.16478	1.09901	1.15013	1.0537
0.579937	0.568241	0.566758	0.576087	0.52434	0.546964	0.526279	0.542942	0.543688	0.515874	0.541762	0.541586	0.54722	0.517916	0.528352	0.52983	0.531316	0.522039	0.502171	0.500741	0.507775	0.514436	0.521274	0.528296	0.53551	0.554026	0.540219	0.527084	0.522682	0.518353	0.511047	0.503943	0.504191	0.504438	0.504686	0.512707	0.510877	0.502431	0.510193	0.518199	0.521345	0.52453	0.527754	0.564786	0.525944	0.552894	0.540775	0.532706	0.518851	0.526639
0.976229	0.975025	0.972818	0.983004	0.96174	0.976954	0.990834	0.878267	0.948265	0.904925	0.946517	0.921686	0.900632	0.879459	0.864517	0.897711	0.915305	0.879699	0.829452	0.865773	0.860418	0.820342	0.82508	0.767424	0.793414	0.662565	0.700622	0.811718	0.809841	0.836887	0.839642	0.859316	0.808423	0.777686	0.82203	0.818153	0.860029	0.862704	0.878569	0.888637	0.876549	0.875503	0.880846	0.866558	0.917086	0.938142	0.881589	0.863596	0.882241	0.841932
0.770324	0.75448	0.808554	0.727444	0.731008	0.708869	0.719821	0.714628	0.698248	0.720168	0.717891	0.720046	0.716966	0.720007	0.696199	0.710677	0.699713	0.755641	0.755801	0.69242	0.743061	0.726949	0.727757	0.748106	0.734738	0.712047	0.69737	0.695165	0.782465	0.657039	0.731872	0.710878	0.77531	0.712595	0.767316	0.757713	0.756597	0.739687	0.718066	0.810758	0.793312	0.848086	0.784591	0.728258	0.760421	0.744809	0.783834	0.767808	0.774212	0.684373
0.664004	0.652733	0.652374	0.650272	0.657472	0.65676	0.659353	0.668824	0.66698	0.67447	0.66604	0.659194	0.652566	0.651876	0.662028	0.668813	0.685297	0.66434	0.658628	0.654283	0.683842	0.638309	0.683579	0.716398	0.70002	0.713268	0.684009	0.669118	0.671349	0.693713	0.701948	0.659028	0.691612	0.665594	0.680486	0.689432	0.690026	0.70578	0.70884	0.708852	0.702893	0.722373	0.722056	0.734171	0.708884	0.710615	0.71116	0.694129	0.69648	0.703306
2.83931	2.84863	2.86905	2.88849	2.83251	2.8513	2.92809	2.95893	2.95894	2.89876	2.8159	2.86381	2.83121	2.85166	2.94048	2.8531	2.85762	2.92912	2.78659	2.88699	2.86398	2.89592	2.78526	2.89405	2.76116	2.70787	2.5066	2.69406	2.66886	2.7178	2.60899	2.67304	2.73037	2.69644	2.68678	2.64105	2.68196	2.68692	2.86344	2.89011	2.88983	2.84463	2.8801	2.78322	2.73879	2.8015	2.86714	2.93594	2.96264	2.98982
1.0321	0.869882	0.751731	0.737272	0.72336	0.790571	0.779638	0.744817	0.778156	0.746988	0.741386	0.731447	0.724031	0.716467	0.759446	0.760656	0.729572	0.734607	0.739711	0.730385	0.732659	0.734947	0.734294	0.738653	0.743064	0.70921	0.714389	0.726296	0.695887	0.711239	0.724957	0.748501	0.755078	0.678441	0.764268	0.659182	0.70817	0.741296	0.771544	0.7596	0.753201	0.761863	0.791116	0.75393	0.770984	0.76746	0.796411	0.799458	0.775571	0.77391
0.71905	0.722422	0.735594	0.708712	0.713686	0.68927	0.714765	0.738666	0.730748	0.728431	0.735322	0.742344	0.749502	0.790293	0.757764	0.758635	0.771763	0.758566	0.76498	0.771504	0.739895	0.757431	0.773196	0.754801	0.737261	0.732996	0.728781	0.721382	0.714132	0.707027	0.718231	0.729795	0.741738	0.754078	0.763998	0.765467	0.766942	0.768422	0.803389	0.788503	0.774159	0.760327	0.762898	0.765486	0.768092	0.770715	0.773357	0.776017	0.778695	0.805045
1.2523	1.27459	1.26949	1.28155	1.23486	1.30788	1.32624	1.1554	1.25585	1.34366	1.10617	1.13553	1.4087	1.42164	1.25813	1.22699	1.23861	1.21872	1.10681	1.33532	1.30199	1.36124	1.24758	1.28132	1.34791	1.29585	1.29131	1.41292	1.29839	1.39628	1.47292	1.24456	1.57098	1.36252	1.33659	1.39171	1.29852	1.31545	1.33283	1.41225	1.437	1.38335	1.36635	1.52677	1.32053	1.59903	1.51901	1.33598	1.32649	1.45313
0.846757	0.834508	0.816075	0.888672	0.853637	0.84835	0.827791	0.820079	0.825436	0.815003	0.788061	0.810358	0.787279	0.799366	0.80584	0.828783	0.813792	0.740726	0.835921	0.848959	0.86241	0.905174	0.828015	0.836989	0.850303	0.879537	0.874011	0.833068	0.839932	0.871557	0.834693	0.858755	0.827153	0.84588	0.836896	0.815048	0.851893	0.810346	0.813348	0.835356	0.814364	0.841191	0.829181	0.817509	0.806162	0.810681	0.809194	0.855691	0.889255	0.903392
0.813383	0.837606	0.808705	0.825901	0.826971	0.815856	0.826629	0.822028	0.803309	0.840152	0.834193	0.840889	0.837401	0.81489	0.827988	0.845459	0.835049	0.79103	0.806691	0.775574	0.786005	0.790449	0.781278	0.785499	0.789851	0.788568	0.779572	0.789929	0.802615	0.826166	0.802727	0.787805	0.829189	0.810636	0.799071	0.822441	0.834059	0.828747	0.79399	0.815345	0.811844	0.843971	0.826281	0.855145	0.833447	0.843991	0.825599	0.827665	0.785954	0.788124
0.899589	0.898641	0.900554	0.876868	0.841643	0.847848	0.81816	0.859698	0.827171	0.850298	0.844704	0.860432	0.854418	0.880123	0.866676	0.904844	0.884394	0.858814	0.865589	0.836015	0.886373	0.876649	0.863827	0.862069	0.882241	0.864226	0.877403	0.902132	0.900326	0.870316	0.924706	0.899705	0.966692	0.923492	0.894214	0.931589	0.912799	0.96833	1.00935	1.03222	0.95624	1.121	1.15065	1.24826	1.31595	1.29359	1.45889	1.47191	1.28859	1.29358
0.769572	0.797933	0.795624	0.811738	0.82278	0.792511	0.805222	0.813433	0.819399	0.813628	0.836292	0.809606	0.808427	0.822743	0.814326	0.791604	0.812653	0.846679	0.792346	0.802494	0.811974	0.840919	0.816879	0.823046	0.827637	0.851062	0.838298	0.81805	0.827117	0.846762	0.842175	0.862202	0.865821	0.869807	0.859457	0.887306	0.875329	0.860879	0.897357	0.889257	0.901907	0.857182	0.881141	0.896761	0.877444	0.873554	0.902878	0.841675	0.83737	0.899251
0.559857	0.523786	0.523244	0.517607	0.516221	0.504328	0.514015	0.509004	0.505692	0.502423	0.506974	0.501956	0.503521	0.505097	0.50357	0.503342	0.503114	0.505339	0.507584	0.509849	0.519572	0.529673	0.540174	0.5511	0.548999	0.546914	0.544845	0.542792	0.540754	0.538731	0.536723	0.534731	0.532752	0.530789	0.52884	0.526905	0.524984	0.523078	0.521185	0.519305	0.51744	0.515587	0.513748	0.511922	0.510109	0.508308	0.508643	0.508977	0.509312	0.509648
0.581584	0.636295	0.608983	0.602804	0.663136	0.65039	0.663084	0.662984	0.659581	0.64981	0.643486	0.630683	0.617718	0.612223	0.623169	0.602988	0.610946	0.640967	0.653456	0.648546	0.624274	0.660868	0.653539	0.597022	0.636962	0.613049	0.607694	0.612409	0.558289	0.6004	0.610109	0.639315	0.663042	0.665903	0.631181	0.639499	0.638723	0.62317	0.637623	0.65638	0.633515	0.624907	0.622781	0.644314	0.603115	0.645835	0.617685	0.615119	0.624711	0.638405
1.37995	1.82751	1.43189	1.15282	1.44075	1.62347	2.06102	1.42783	1.09227	0.970025	1.17238	1.15086	1.03949	1.04117	1.07011	1.0795	1.17608	1.06526	0.976507	1.01298	1.12924	1.1444	1.15363	1.18292	1.21374	1.06791	1.11512	1.1667	1.09491	1.30813	1.16315	1.18673	1.07169	0.958066	1.16967	1.10462	1.08331	1.14164	1.16028	1.08337	1.22936	1.26196	1.28046	1.25372	1.15365	1.06464	1.12143	1.13189	1.01481	1.15676
																																			0.564169	0.549273	0.535143	0.521722	0.508957	0.509487	0.510017	0.510549	0.511081	0.511615	0.51215	0.512686	0.513224	0.513762	0.514301
1.05492	0.98397	1.06548	1.1123	1.14287	1.19125	1.11373	1.10344	1.2707	1.04426	1.18778	1.16283	1.16111	1.17863	1.11756	1.0141	1.14086	1.20302	1.14689	1.17836	1.12319	1.10764	1.06276	1.11975	1.22638	1.12839	1.02391	1.13307	1.02919	1.05331	1.24131	1.66809	1.8869	1.9147	1.9661	2.01583	1.94699	1.85011	1.81324	1.58336	2.05474	1.88354	1.62471	1.51969	1.59966	1.79791	1.76449	1.79102	1.81777	1.72233
0.727316	0.714124	0.677842	0.687294	0.680597	0.683332	0.667138	0.697114	0.683597	0.683463	0.668878	0.650939	0.668504	0.710829	0.682155	0.708738	0.692429	0.687903	0.702902	0.640397	0.64617	0.65432	0.644864	0.679083	0.703874	0.661299	0.687248	0.661406	0.683385	0.693198	0.704005	0.689345	0.698241	0.742369	0.760211	0.736684	0.764494	0.804582	0.766039	0.740136	0.672853	0.696805	0.707051	0.666111	0.668956	0.692648	0.648834	0.725377	0.715157	0.728859
0.871784	0.870311	0.884566	0.889519	0.877312	0.862661	0.873341	0.883633	0.866854	0.844484	0.884034	0.89778	0.898242	0.886879	0.915838	0.943085	0.955145	0.937586	0.926499	0.956068	0.992849	1.00038	1.0208	1.01196	1.02706	1.00364	0.988087	1.00228	0.967011	0.963204	0.994197	1.0058	1.00187	1.05169	1.03569	0.978886	1.00851	1.02337	1.07252	1.06235	1.09782	1.03834	1.05578	1.02429	0.995583	0.955407	1.01249	0.97416	0.964809	0.9421
0.661245	0.659609	0.653678	0.64264	0.640174	0.633374	0.659007	0.617411	0.617707	0.61674	0.613526	0.607783	0.639519	0.615951	0.632537	0.612544	0.65339	0.615929	0.615248	0.631144	0.656025	0.627206	0.625593	0.624898	0.624752	0.639384	0.638709	0.636141	0.632953	0.648652	0.64459	0.65099	0.632869	0.636391	0.635939	0.617788	0.620958	0.622986	0.621112	0.612076	0.624892	0.642038	0.636864	0.627825	0.641124	0.637169	0.644806	0.652094	0.608258	0.628147
3.42146	3.36327	3.27255	3.38099	3.06123	3.268	3.10576	3.47768	3.15342	3.07473	3.21423	3.56993	3.05732	3.07833	3.17575	3.09979	3.44325	3.00554	3.24619	3.26118	3.17477	3.35262	3.1826	3.16789	3.32284	2.97257	2.86575	2.88869	2.69782	2.90365	2.9276	2.7136	2.85658	2.61144	2.70052	2.72159	3.17883	3.22123	3.34745	3.34107	3.57146	3.66353	3.75061	3.84193	3.67867	3.764	3.37394	2.73746	3.28591	3.21935
0.828231	0.8277	0.835096	0.826988	0.824064	0.81971	0.80895	0.809771	0.789274	0.807873	0.789594	0.796888	0.791589	0.755652	0.782226	0.74711	0.774066	0.758004	0.769612	0.764165	0.760115	0.745253	0.752899	0.748255	0.748591	0.748426	0.759392	0.750247	0.7525	0.763857	0.739978	0.759797	0.757987	0.737952	0.75405	0.743859	0.77064	0.769812	0.805552	0.822389	0.8278	0.837591	0.827078	0.793524	0.824889	0.805238	0.822898	0.797727	0.801586	0.799155
0.751824	0.770148	0.729987	0.775042	0.750447	0.737489	0.770615	0.753534	0.684518	0.745077	0.729965	0.747475	0.725186	0.709509	0.694496	0.691687	0.709911	0.681944	0.687013	0.691127	0.694745	0.698401	0.685977	0.739844	0.696688	0.707848	0.625703	0.699669	0.669516	0.652294	0.669268	0.663031	0.613383	0.621206	0.657083	0.667681	0.607369	0.623992	0.64932	0.678857	0.627303	0.680568	0.662983	0.656116	0.692491	0.610203	0.651822	0.625544	0.619779	0.672703
0.661146	0.682724	0.662985	0.650898	0.661818	0.669289	0.67693	0.673256	0.669993	0.69681	0.704133	0.690313	0.694756	0.699977	0.705276	0.710656	0.688511	0.699488	0.703157	0.706865	0.710613	0.7144	0.718228	0.713266	0.708372	0.69914	0.698317	0.697496	0.696676	0.695859	0.708666	0.721954	0.709594	0.697649	0.718791	0.698563	0.731502	0.730222	0.728947	0.769938	0.759969	0.770924	0.7822	0.776365	0.774602	0.766366	0.754252	0.742516	0.785607	0.793468
																											0.511447	0.502843	0.504333	0.503653	0.502974	0.520142	0.514615	0.506627	0.525585	0.506336	0.508908	0.511506	0.508384	0.514806	0.5039	0.515031	0.549722	0.519719	0.530087	0.50727	0.520247	0.520567	0.524924
1.57427	1.49947	1.53163	1.7973	1.83729	1.87685	1.73771	2.31496	2.69304	2.05473	2.79433	2.65463	2.95906	2.92037	3.08644	3.0242	3.03346	3.16105	3.17435	2.99534	3.16932	3.25213	3.26072	3.19159	3.26693	3.21266	2.92603	2.57535	3.41111	3.5785	3.50112	4.24662	4.34037	4.44194	4.5935	4.43234	4.50321	4.40516	4.23441	4.52431	4.40317	4.39157	4.47665	4.5355	4.47231	4.2607	4.69819	4.79136	4.50614	4.38919
1.11398	1.13848	1.08111	1.12579	1.13135	1.08002	1.0862	1.10649	1.05679	1.06746	1.02122	1.05781	1.05619	1.02601	1.04534	1.11334	1.06963	1.0364	1.05611	1.03674	1.02399	0.982481	1.03367	1.05395	1.01062	1.01781	0.969626	1.00402	0.971176	1.00626	0.97197	1.03457	1.02761	1.00484	1.03841	1.01374	0.936673	1.04335	1.02053	1.02801	1.0299	1.02781	1.03156	1.07585	1.03046	0.991532	0.981549	0.982588	0.958576	0.968027
1.26038	1.23002	1.28226	1.25834	1.20169	1.20307	1.23188	1.20201	1.137	1.14668	1.14179	1.12008	1.14641	1.14315	1.07535	1.09866	1.07861	1.06247	1.03486	1.05406	1.01928	1.01017	0.979336	1.0004	0.991313	0.989549	0.946287	0.961193	0.948723	0.951038	0.961569	0.934978	0.908445	0.932378	0.92895	0.933731	0.971532	0.991517	1.00429	0.980126	0.949334	0.952775	0.967569	0.92888	0.878817	0.869774	0.860915	0.84265	0.889766	0.83595
0.629844	0.599851	0.654653	0.720476	0.801014	0.731886	0.673741	0.57743	0.607284	0.640394	0.702157	0.641805	0.656518	0.634863	0.629488	0.673685	0.628909	0.638336	0.627765	0.617538	0.607638	0.648019	0.694149	0.747349	0.809382	0.69659	0.61139	0.622424	0.609309	0.626855	0.606821	0.622745	0.649444	0.670135	0.667326	0.649653	0.632527	0.62834	0.667109	0.65125	0.652951	0.652531	0.656337	0.626751	0.647356	0.616799	0.615142	0.619569	0.632986	0.629963
0.904802	0.896352	0.867112	0.835485	0.85153	0.833839	0.8606	0.860658	0.811041	0.857812	0.810466	0.867665	0.875434	0.854526	0.759462	0.847717	0.798405	0.854546	0.856655	0.839901	0.780185	0.866568	0.809377	0.83704	0.866662	0.84978	0.816513	0.8701	0.877035	0.909207	0.874924	0.812685	0.800938	0.865473	0.833834	0.892044	0.857425	0.840866	0.875896	0.959677	0.911334	0.968552	0.959221	0.994855	1.0195	1.04541	0.97282	0.978758	0.957688	0.989736
0.891895	0.890956	0.89002	0.889086	0.888154	0.887223	0.886295	0.892884	0.87609	0.888415	0.910956	0.91107	0.907964	0.851717	0.870015	0.889117	0.863912	0.896379	0.867546	0.880521	0.870809	0.895978	0.879663	0.863932	0.864915	0.872309	0.879831	0.865846	0.852298	0.839167	0.856435	0.875804	0.892089	0.890365	0.888133	0.930092	0.895676	0.883006	0.92266	0.894102	0.909274	0.901251	0.949478	0.919097	1.02674	0.999652	0.912094	0.947424	0.94047	0.933617
1.9413	1.9433	1.84674	1.79114	2.10211	1.92124	1.86664	1.88841	1.77828	1.77812	1.77795	1.77778	1.77761	1.89899	1.7916	1.84435	1.76171	2.17452	2.06177	1.96014	1.78607	1.85999	2.02327	2.95143	2.07265	2.69883	1.92069	2.21793	2.62402	2.86837	3.1629	2.82619	2.7844	2.40207	2.28382	3.44821	2.83669	2.31114	2.30128	2.72985	3.35458	2.8586	3.18287	2.91025	3.00762	3.08407	3.16452	3.10348	2.83644	2.70564
1.08727	1.01053	0.94391	0.885531	0.833953	0.788052	0.884585	0.864507	0.845321	0.826967	0.809394	0.792552	0.776396	0.760886	0.745984	0.731654	0.639551	0.736796	0.699307	0.665449	0.634717	0.606442	0.586029	0.566946	0.549067	0.532281	0.56098	0.592951	0.536506	0.548718	0.533185	0.523544	0.576505	0.597363	0.65152	0.646129	0.591491	0.545372	0.548081	0.550816	0.55859	0.536206	0.517507	0.555152	0.587819	0.570729	0.530394	0.532315	0.519997	0.524472
0.811579	0.794493	0.771221	0.792359	0.780976	0.766775	0.764422	0.782417	0.750513	0.741785	0.784168	0.758891	0.762462	0.78627	0.771416	0.758773	0.761182	0.768196	0.767974	0.77398	0.733978	0.764681	0.734273	0.741509	0.753872	0.766653	0.745015	0.724564	0.757859	0.745054	0.733597	0.722487	0.725761	0.729065	0.740226	0.751733	0.762013	0.758627	0.73974	0.754611	0.737994	0.758759	0.747639	0.737475	0.742777	0.748225	0.753753	0.759363	0.71838	0.6895
2.21969	2.10305	2.10476	2.17837	2.14365	2.10064	2.05933	2.1717	2.17409	2.13842	2.18178	2.03949	2.03646	1.99487	2.15705	2.04654	1.9468	2.01805	2.14024	2.15801	2.17609	2.16023	1.99188	1.88727	2.01464	1.98005	1.94663	1.8416	1.62792	1.60481	1.58235	1.5605	1.51338	1.44251	1.41167	1.52777	1.54352	1.61238	1.6226	1.51229	1.65395	1.6301	1.58714	1.54638	1.64167	1.65469	1.66791	1.69268	1.73255	1.69215
	0.742646	0.741994	0.745908	0.738921	0.755043	0.730846	0.741978	0.72987	0.730178	0.715395	0.707167	0.711355	0.715592	0.713324	0.701803	0.725854	0.73023	0.70542	0.701942	0.704362	0.735137	0.703977	0.715566	0.713353	0.722081	0.720786	0.716742	0.698108	0.715351	0.731928	0.717954	0.751201	0.749461	0.755046	0.739958	0.758773	0.738199	0.756462	0.737097	0.764121	0.74996	0.774567	0.782169	0.769364	0.789887	0.764257	0.774265	0.784213	0.792527
	0.650383	0.586197	0.589361	0.59256	0.595793	0.599061	0.602366	0.605708	0.601518	0.618809	0.604037	0.589955	0.609098	0.611559	0.614041	0.617692	0.621388	0.614249	0.640646	0.619604	0.63765	0.609806	0.615894	0.622106	0.64506	0.620966	0.612979	0.606964	0.601065	0.59528	0.620952	0.648938	0.65278	0.656668	0.656281	0.655894	0.64138	0.680023	0.673338	0.69274	0.707863	0.69861	0.709216	0.703599	0.692077	0.677929	0.684175	0.703772	0.718102
	0.513686	0.51482	0.515958	0.517102	0.51825	0.519404	0.525	0.530719	0.536563	0.542538	0.548647	0.561165	0.530165	0.502411	0.512708	0.557557	0.557494	0.557431	0.557368	0.557305	0.557242	0.557797	0.558352	0.558908	0.559466	0.550078	0.575201	0.554479	0.592124	0.549512	0.537522	0.541621	0.542135	0.550411	0.567024	0.587821	0.543435	0.57773	0.585601	0.560457	0.56636	0.56969	0.571097	0.560007	0.558243	0.52948	0.549982	0.517527	0.517779
	1.18905	1.20068	1.21254	1.22463	1.28528	1.35224	1.36611	1.50864	1.49607	1.56826	1.34724	1.34267	1.33814	1.33363	1.37206	1.60433	1.47483	1.56252	1.51071	1.64184	1.87073	1.87662	1.80955	2.06521	1.75569	1.87646	1.74856	1.76402	2.16889	1.92585	2.01638	2.09662	2.06972	2.34393	2.05415	1.88076	1.993	1.85866	1.95061	1.84129	1.64549	1.68813	1.7259	1.73703	1.68059	1.70628	1.75676	1.74499	1.72333
				1.02974	1.04996	1.05705	1.05812	1.05919	1.05195	1.0448	1.04797	1.05116	1.01603	0.983171	0.984559	0.970529	0.947892	0.923372	0.918927	0.901422	0.884074	0.884634	0.891756	0.847213	0.854603	0.855582	0.873811	0.818531	0.860986	0.86003	0.841881	0.834629	0.833189	0.856275	0.832428	0.863904	0.8741	0.888023	0.881382	0.89734	0.895692	0.884798	0.884947	0.84203	0.834899	0.856593	0.832892	0.846516	0.809814
						0.919001	0.876963	0.838602	0.835563	0.832546	0.838847	0.857131	0.819604	0.844053	0.839172	0.845667	0.851219	0.850645	0.842377	0.830741	0.836216	0.836712	0.839335	0.84376	0.78457	0.816425	0.857822	0.754153	0.807201	0.808933	0.81954	0.800327	0.743623	0.719316	0.79803	0.73401	0.740136	0.746365	0.752699	0.759142	0.765697	0.744574	0.740474	0.710003	0.721049	0.734924	0.79448	0.719833	0.759871
										0.833532	0.83841	0.843347	0.848341	0.8028	0.761899	0.724964	0.750199	0.743018	0.735973	0.763898	0.777196	0.790965	0.80523	0.82002	0.835363	0.851291	0.845244	0.84974	0.854284	0.858877	0.863519	0.868212	0.872957	0.882603	0.892464	0.902549	0.858095	0.854275	0.853131	0.863255	0.88581	0.85349	0.862544	0.858656	0.848786	0.889609	0.860698	0.867956	0.875337
														3.97545	1.76894	1.13756	0.838332	0.782385	0.740085	0.702125	0.698646	0.695202	0.691791	0.688414	0.68507	0.681758	1.16445	3.98806	4.10035	4.21914	4.10314	2.03507	1.35309	1.01346	0.810119	0.809242	0.808367	0.952924	0.785476	0.991583	1.34433	2.08664	4.65952	4.34509	4.07042	3.82841	3.61357	3.42155	3.24892
													0.857802	0.83856	0.839503	0.840448	0.841395	0.842344	0.82992	0.817857	0.813146	0.819799	0.807208	0.794998	0.820046	0.816026	0.837256	0.939697	1.0669	1.07643	1.04697	1.02921	1.01856	1.02821	1.02441	0.997239	0.99277	0.962189	0.954792	0.963341	0.948075	0.892153	0.852532	0.857731	0.826736	0.856352	0.802665	0.830606	0.80428
																																0.680792	0.688744	0.696885	0.70522	0.768434	0.76674	0.765052	0.763372	0.722907	0.686515	0.674015	0.644771	0.722905	0.643507	0.64345	0.643393	0.603567	0.578868
																																1.18634	1.20923	1.40543	1.32625	1.36032	1.48993	1.33138	1.20334	1.12412	1.29859	1.46884	1.34883	1.61084	1.28898	1.24866	1.58007	1.41742	1.28513
																																0.754896	0.780006	0.806843	0.820233	0.834075	0.848392	0.86321	0.878554	0.841248	0.913013	0.934379	0.884433	0.903996	0.921981	0.921231	0.926906	0.884713	0.912699
																																	1.09212	1.14965	1.12632	1.15418	1.18347	1.12222	1.12287	1.08667	1.11484	1.0922	1.10518	1.05027	1.01019	1.06338	1.02805	1.01542	1.04318
																																				0.983083	0.980017	0.97697	0.973942	0.970933	0.967943	0.964971	0.962017	0.959081	0.961332	0.963593	0.965864	0.965382	0.904309
																																																1.00695	0.962877
																																																	0.537886
0.886149	0.870545	0.891578	0.890407	0.875545	0.858626	0.877385	0.866363	0.861142	0.86138	0.860906	0.855908	0.870068	0.870324	0.871008	0.861322	0.879951	0.883728	0.883689	0.887901	0.886728	0.893036	0.884164	0.881653	0.866795	0.865893	0.854033	0.855813	0.842851	0.846822	0.847587	0.860859	0.840896	0.846956	0.834715	0.821051	0.85498	0.836392	0.871488	0.856325	0.834913	0.871118	0.874073	0.842395	0.885625	0.854839	0.855018	0.824372	0.854312	0.852359
0.535026	0.540601	0.546321	0.537588	0.539722	0.548596	0.529778	0.524483	0.514827	0.518575	0.52727	0.526763	0.519582	0.531897	0.53763	0.519591	0.510681	0.514369	0.527915	0.511779	0.521521	0.525563	0.522778	0.510683	0.522044	0.510207	0.513882	0.51118	0.520352	0.526109	0.517055	0.55012	0.53826	0.556388	0.549837	0.557765	0.548342	0.564981	0.564261	0.573613	0.591211	0.601688	0.60162	0.610826	0.622148	0.629993	0.632684	0.611652	0.613621	0.599184
0.920914	0.919908	0.923241	0.937666	0.926712	0.913292	0.933914	0.916444	0.950357	0.91201	0.92758	0.899489	0.935853	0.913968	0.928132	0.952127	0.922807	0.942172	0.971081	0.973571	0.975085	0.959149	0.967287	0.987891	0.98655	0.95585	0.969722	0.966439	0.936452	0.960892	0.951898	0.953054	0.988655	0.958668	0.98135	0.999542	0.992929	0.992299	0.984246	0.995511	1.01099	1.01288	0.998095	1.02478	0.997302	1.00165	1.00814	0.978206	0.999103	0.986937
1.01216	1.03136	1.01574	1.07465	1.0371	1.05421	1.03173	1.04158	1.02746	1.02368	1.03089	1.06299	1.0624	1.0248	1.01183	1.01983	0.998762	1.02821	1.01315	1.03729	1.03283	0.998684	0.99748	0.951381	1.00824	0.972038	0.964838	0.995822	0.984023	0.931758	0.921447	0.943276	0.984571	0.97072	0.96154	0.993594	1.02197	1.00469	1.05033	1.0336	1.03209	1.03484	0.986426	1.00106	1.00998	0.986589	0.991365	0.953627	0.925957	0.946594
1.33679	1.34077	1.26562	1.16697	1.30332	1.26721	1.26889	1.34527	1.20089	1.10912	1.17111	1.23649	1.20003	1.19218	1.27676	1.29486	1.10917	1.19545	1.22654	1.25928	1.29383	1.31204	1.34489	1.32897	1.35708	1.29316	1.36558	1.25247	1.29868	1.17058	1.14288	1.23765	1.1286	1.0817	1.09823	1.18999	1.25353	1.18774	1.18617	1.1792	1.27656	1.18291	1.15695	1.13721	1.23884	1.06233	1.14296	1.12301	1.07734	1.08409
0.62166	0.602498	0.576008	0.583428	0.592774	0.570592	0.583161	0.576897	0.571707	0.577242	0.585977	0.584959	0.59617	0.583002	0.605288	0.605551	0.615317	0.603907	0.599127	0.612601	0.608842	0.618938	0.628248	0.630325	0.642538	0.635979	0.649713	0.645316	0.635161	0.633145	0.648083	0.663005	0.663118	0.656342	0.663991	0.661689	0.675512	0.679922	0.70025	0.687923	0.691348	0.710387	0.727749	0.717297	0.717875	0.707311	0.707188	0.728458	0.721667	0.724059
1.01296	1.16468	1.14724	1.04702	1.11012	1.02322	1.08007	1.05976	1.0148	0.962735	1.05105	1.03266	1.00416	1.00895	1.03741	0.996168	0.940429	0.94053	0.963006	0.963393	0.962621	1.01887	0.983811	1.01423	1.0248	1.01604	0.972169	1.04698	1.01005	0.98012	0.993222	1.02662	1.07356	1.08777	1.09645	1.09213	1.05305	1.14351	1.15222	1.16655	1.21398	1.19781	1.15914	1.13117	1.1612	1.18174	1.16464	1.15183	1.08201	1.09191
0.661452	0.748166	0.703116	0.642636	0.731662	0.738617	0.667173	0.793486	0.781254	0.818714	0.741748	0.739935	0.723072	0.700508	0.675729	0.714302	0.649753	0.665938	0.689409	0.668204	0.658743	0.694416	0.696926	0.690773	0.720555	0.657506	0.664819	0.690618	0.693838	0.715498	0.69443	0.765978	0.754019	0.755929	0.801146	0.755214	0.774415	0.805893	0.793072	0.715692	0.740589	0.807054	0.74069	0.843995	0.77258	0.825689	1.03568	1.10597	0.983822	1.10902
0.959156	0.956604	0.94958	0.957185	0.970259	0.942635	0.938921	0.945064	0.947683	0.934477	0.938081	0.931278	0.934162	0.945762	0.943174	0.939942	0.960117	0.94596	0.969967	0.949862	0.942266	0.939623	0.939369	0.933891	0.934276	0.89123	0.941074	0.923087	0.942424	0.915815	0.898114	0.919495	0.933627	0.933301	0.946808	0.939809	0.927269	0.959136	0.940481	0.953642	0.952237	0.940435	0.968448	0.927699	0.932214	0.891997	0.894576	0.879095	0.870325	0.862232
1.19221	1.19757	1.18322	1.18955	1.20155	1.17476	1.17253	1.16463	1.15047	1.11165	1.13432	1.15681	1.15176	1.14071	1.13939	1.14197	1.18121	1.13042	1.17303	1.18358	1.17832	1.16948	1.16698	1.19739	1.14929	1.14467	1.17321	1.19092	1.1925	1.19813	1.18428	1.20889	1.22015	1.24735	1.20987	1.21394	1.21009	1.25323	1.24428	1.26095	1.27125	1.25143	1.27392	1.28435	1.26975	1.26568	1.29485	1.32974	1.31859	1.3149
0.729536	0.721159	0.732051	0.730295	0.733235	0.711497	0.699807	0.688496	0.677544	0.666935	0.727934	0.728604	0.740905	0.726913	0.748342	0.7335	0.736689	0.73413	0.708814	0.709965	0.717938	0.726004	0.746806	0.739471	0.739125	0.713583	0.70754	0.717762	0.73947	0.720037	0.711667	0.760373	0.743644	0.724243	0.756801	0.73187	0.736317	0.729385	0.741177	0.733686	0.737222	0.73876	0.773612	0.748165	0.723763	0.760219	0.742514	0.75127	0.657855	0.744659
0.618346	0.627984	0.599831	0.602552	0.605298	0.60807	0.623096	0.645513	0.600723	0.588938	0.60358	0.606046	0.621529	0.624803	0.629756	0.598343	0.596286	0.621187	0.599836	0.631374	0.584197	0.602717	0.605092	0.624627	0.608518	0.531277	0.604195	0.622519	0.626749	0.604236	0.601128	0.592399	0.602227	0.594465	0.615661	0.592359	0.604864	0.606876	0.613607	0.625991	0.642895	0.651673	0.645063	0.663529	0.674445	0.668707	0.705176	0.690873	0.701305	0.694165
0.647726	0.639355	0.627083	0.631226	0.632108	0.629627	0.62805	0.616977	0.61805	0.605496	0.620409	0.605286	0.605039	0.603731	0.601054	0.619203	0.609174	0.611012	0.601948	0.594895	0.602474	0.594682	0.600186	0.591052	0.594204	0.587006	0.570595	0.580756	0.574978	0.590922	0.579855	0.601056	0.598998	0.603375	0.59485	0.599404	0.60045	0.591913	0.605506	0.606374	0.60456	0.602671	0.616923	0.610623	0.599808	0.611534	0.601407	0.614847	0.599636	0.597383
0.800063	0.776565	0.792802	0.766819	0.76494	0.775728	0.785535	0.795593	0.805912	0.850187	0.875941	0.847092	0.835364	0.840035	0.84691	0.849777	0.873492	0.867361	0.828116	0.858817	0.851614	0.872678	0.875937	0.841129	0.875905	0.829415	0.804616	0.821068	0.857935	0.85798	0.839165	0.807081	0.786053	0.825723	0.824743	0.821116	0.856324	0.851022	0.851714	0.857006	0.884032	0.857535	0.872587	0.889937	0.875053	0.915953	0.929163	0.925424	0.969447	0.945616
0.688984	0.685931	0.666969	0.652061	0.656772	0.666573	0.610228	0.614218	0.644944	0.636224	0.625134	0.591852	0.592725	0.569083	0.600477	0.616053	0.6108	0.609271	0.600514	0.626151	0.628391	0.623353	0.599489	0.624007	0.624037	0.59514	0.612077	0.608833	0.607161	0.609168	0.60793	0.630091	0.627501	0.608946	0.595111	0.61371	0.638685	0.645414	0.64253	0.646941	0.627329	0.675492	0.663238	0.646741	0.668504	0.634363	0.688192	0.687832	0.681198	0.672692
0.629263	0.646776	0.635116	0.636455	0.624387	0.603448	0.61878	0.628875	0.615556	0.633202	0.616718	0.621558	0.605826	0.617645	0.598023	0.628027	0.600781	0.590542	0.591272	0.584273	0.588441	0.587736	0.590493	0.586396	0.585846	0.582451	0.602116	0.593624	0.594472	0.586443	0.590295	0.604767	0.595803	0.608487	0.605553	0.584357	0.602237	0.61195	0.615469	0.627124	0.631855	0.655641	0.647192	0.674906	0.668176	0.651072	0.674058	0.668525	0.677891	0.647903
0.712218	0.728063	0.699959	0.699169	0.678438	0.685653	0.705638	0.669622	0.651985	0.657481	0.642812	0.655061	0.63262	0.635914	0.640293	0.648399	0.643955	0.643953	0.687012	0.667184	0.66694	0.677255	0.669888	0.655374	0.670773	0.668778	0.66718	0.668801	0.658143	0.666419	0.664511	0.658436	0.672211	0.656122	0.669328	0.672028	0.683082	0.698624	0.691718	0.698995	0.701128	0.7005	0.703305	0.683958	0.687137	0.687859	0.675711	0.698296	0.675172	0.657121
			0.669809	0.630839	0.662436	0.608115	0.599491	0.632424	0.668236	0.598904	0.643551	0.613339	0.686426	0.779289	0.799576	0.847095	0.790549	0.780831	0.861968	0.834876	0.895804	0.816992	0.934549	0.881578	0.847398	0.821926	0.870083	0.831649	0.868413	0.844808	0.863493	0.901428	0.906467	0.848219	0.877384	0.841529	0.840701	0.856927	0.895332	0.894453	0.929609	0.884315	0.946106	0.938333	0.973013	0.990247	0.972095	0.932589	0.938681
0.73932	0.745836	0.748586	0.739442	0.723986	0.725223	0.725368	0.711896	0.715767	0.717233	0.717391	0.722392	0.716337	0.716624	0.715468	0.70518	0.700707	0.71201	0.694166	0.702385	0.662162	0.667107	0.678609	0.693668	0.663107	0.695415	0.684365	0.681233	0.678736	0.668634	0.67507	0.677396	0.618353	0.625573	0.642241	0.65907	0.664986	0.642002	0.656962	0.699222	0.687905	0.678304	0.69109	0.690205	0.699234	0.681409	0.684826	0.688421	0.696087	0.695643
0.641186	0.627887	0.643829	0.614921	0.613053	0.595598	0.590334	0.600739	0.603689	0.604448	0.603482	0.578258	0.591437	0.574195	0.599179	0.588736	0.571056	0.573325	0.577192	0.593762	0.591425	0.597524	0.598741	0.589938	0.592932	0.596895	0.59305	0.610447	0.609224	0.595652	0.620022	0.630189	0.640274	0.639907	0.648689	0.664158	0.643834	0.657589	0.652255	0.651523	0.651315	0.644628	0.672171	0.670421	0.6814	0.695079	0.681441	0.694158	0.685665	0.687254
0.905876	0.929606	0.874557	0.865054	0.83453	0.86545	0.860731	0.902051	0.866044	0.855549	0.874415	0.847521	0.841105	0.805162	0.81037	0.821646	0.82448	0.806338	0.815959	0.806881	0.801564	0.820257	0.817205	0.819162	0.846501	0.850852	0.842775	0.90361	0.888033	0.925128	0.894402	0.964341	0.962544	0.97896	0.966743	1.05589	1.02041	1.03778	1.01013	0.989813	0.981069	1.00356	0.964119	0.974787	0.934867	0.918931	0.941649	0.923651	0.952949	0.921038
0.98236	0.958246	0.955991	0.97203	0.958099	0.930799	0.966242	0.920109	0.896489	0.900172	0.929539	0.906572	0.894095	0.896434	0.867984	0.877552	0.884916	0.853672	0.8336	0.878954	0.851887	0.865973	0.870725	0.864309	0.840454	0.821833	0.848702	0.853385	0.834592	0.851072	0.813666	0.835718	0.860911	0.850479	0.868474	0.943404	0.97951	1.00146	1.06628	1.00694	1.01067	1.08852	1.00603	1.02629	0.975112	1.04283	0.980197	0.924924	0.975204	1.01245
	0.546058	0.546279	0.5465	0.726593	1.08372	1.07544	1.06728	1.05924	1.05133	1.04353	1.03585	1.02828	0.983416	1.02598	0.997159	0.934752	1.02071	1.01558	0.908056	1.02006	1.0377	0.981414	1.00546	1.02153	1.04593	0.983657	1.0137	0.950312	1.00545	1.02424	1.0406	1.04612	1.03012	1.04348	1.0335	0.971148	1.03348	0.957707	1.02808	0.974726	1.04061	1.07796	0.929034	1.02866	1.08714	1.08564	1.07399	1.05734	1.03462
0.583342	0.587822	0.592371	0.624527	0.564462	0.56294	0.635509	0.610055	0.622511	0.635487	0.649015	0.802222	1.05011	0.997683	0.95024	0.965963	0.982215	0.999022	0.827608	0.706401	0.781883	0.875426	0.994393	1.25333	1.1947	1.16751	1.14153	1.11667	0.952381	0.830231	0.809293	0.789386	0.770434	0.75237	0.735135	0.718671	0.702929	0.687861	0.589368	0.585758	0.620431	0.659466	0.703742	0.754392	0.846287	0.963675	0.989512	0.957196	0.926924	0.841441
0.960882	0.959519	0.967704	0.9734	0.97267	0.969439	0.977855	0.975006	0.959288	0.95115	0.966175	0.958104	0.949639	0.935977	0.955018	0.943943	0.949916	0.942327	0.938192	0.951128	0.945787	0.962764	0.951173	0.976674	0.976906	0.97914	0.993049	0.986169	0.984536	0.984262	0.990539	1.02868	1.03183	1.03449	1.016	1.05844	1.04138	1.05501	1.04638	1.07455	1.05947	1.0713	1.08887	1.08478	1.08874	1.06785	1.03548	1.09542	1.02122	1.00791
0.85049	0.86341	0.826403	0.898048	0.877429	0.809549	0.908057	0.886267	0.887748	0.867666	0.83939	0.871802	0.850507	0.836368	0.865978	0.844138	0.867488	0.842106	0.867074	0.819351	0.844641	0.783614	0.887191	0.837328	0.84192	0.817873	0.832664	0.833775	0.84809	0.861165	0.87461	0.834064	0.854052	0.864349	0.864493	0.872009	0.908873	0.866613	0.938161	0.889168	0.926506	0.977613	1.04687	1.00812	1.0049	1.00123	1.05518	0.960343	0.987464	1.05287
0.809488	0.805878	0.785401	0.78603	0.794226	0.791306	0.774582	0.779871	0.774796	0.774698	0.763117	0.765087	0.762693	0.762858	0.771894	0.770398	0.771092	0.772193	0.776164	0.771666	0.76751	0.773983	0.755195	0.750585	0.754131	0.743793	0.747281	0.76562	0.760846	0.767643	0.758671	0.761626	0.763102	0.776189	0.775894	0.781731	0.785563	0.804215	0.804124	0.817221	0.827676	0.84266	0.841177	0.820099	0.835124	0.829589	0.814545	0.824076	0.806241	0.809543
0.848468	0.75577	0.681331	0.683827	0.67176	0.612005	0.62248	0.628492	0.591136	0.659685	0.746218	0.752153	0.728611	0.706497	0.685687	0.66733	0.672353	0.662351	0.64728	0.655097	0.634704	0.615541	0.575205	0.589808	0.586087	0.591786	0.574021	0.575919	0.562159	0.53239	0.580621	0.582237	0.615289	0.646496	0.567221	0.566713	0.611651	0.666313	0.697058	0.678473	0.647026	0.655958	0.693268	0.68899	0.647941	0.683047	0.662593	0.672831	0.66623	0.650093
0.759963	0.752561	0.766374	0.750457	0.76821	0.760674	0.782436	0.767165	0.754958	0.753057	0.761833	0.761371	0.751708	0.745801	0.75346	0.74497	0.73578	0.737545	0.725488	0.739856	0.731441	0.72675	0.720491	0.72991	0.731696	0.721134	0.735957	0.731744	0.727838	0.737238	0.741078	0.782451	0.772563	0.78108	0.789594	0.806017	0.796569	0.821273	0.824591	0.834083	0.835057	0.844875	0.840347	0.832209	0.845768	0.802174	0.821623	0.833876	0.82578	0.836877
1.35941	1.34822	1.39272	1.27955	1.30505	1.27963	1.27597	1.27894	1.27398	1.2374	1.25223	1.27072	1.27282	1.24556	1.25213	1.22446	1.20195	1.24944	1.20817	1.18095	1.23089	1.20751	1.19849	1.22792	1.19842	1.25104	1.20049	1.20506	1.25642	1.25418	1.28297	1.30813	1.30202	1.30873	1.27076	1.32364	1.29744	1.32859	1.32226	1.36276	1.32967	1.35653	1.32179	1.3053	1.2836	1.2927	1.32537	1.31188	1.36123	1.34763
0.731937	0.724137	0.703753	0.698335	0.693507	0.697921	0.670649	0.709336	0.679282	0.692873	0.683396	0.668265	0.673062	0.669524	0.619757	0.663894	0.667719	0.665919	0.657043	0.649924	0.669295	0.661549	0.670735	0.672501	0.664723	0.664377	0.663219	0.630085	0.670087	0.649802	0.658992	0.68942	0.664214	0.647648	0.638047	0.638993	0.644764	0.626665	0.640867	0.658008	0.651948	0.660585	0.679682	0.679055	0.671027	0.683767	0.689323	0.694693	0.707917	0.637424
0.952812	0.939687	0.951999	0.953613	0.968405	0.954033	0.968675	0.975854	0.99194	0.968359	0.963545	0.960846	0.965423	0.947824	0.966828	0.954197	0.935408	0.956808	0.946409	0.953273	0.932882	0.970502	0.958225	0.959413	0.957374	0.954637	0.950443	0.960411	0.965992	0.95901	0.973681	0.96915	1.00333	0.988416	1.0008	0.977533	0.994111	1.01332	1.00088	1.00094	1.00799	1.01513	1.03696	1.03887	1.042	1.04974	1.01276	1.01652	1.02106	1.01043
1.01082	1.1069	0.980869	1.0567	1.19949	0.982079	1.00911	1.02113	1.0123	0.961685	0.929158	1.00519	0.982668	0.990482	1.04165	0.975337	0.986946	1.08076	0.99572	0.910065	0.9413	0.973437	1.05397	1.05899	1.01073	0.993672	1.05736	1.03517	0.969359	1.05324	0.993173	1.01344	1.05865	0.964027	1.0052	1.05005	1.06897	1.0833	1.08881	1.03591	1.13228	1.07655	1.08963	1.05185	1.03032	0.975494	0.993919	0.98578	0.982204	0.965421
0.831336	0.836472	0.762119	0.877591	0.988414	0.855535	0.853147	0.850772	0.848411	0.957562	0.874832	0.977927	0.795658	0.670659	0.669755	0.699186	0.677466	0.698185	0.771726	0.697547	0.636378	0.630612	0.604703	0.628847	0.61859	0.647926	0.651009	0.624408	0.624877	0.622234	0.61376	0.634904	0.627392	0.628571	0.605543	0.615118	0.619528	0.598772	0.604568	0.594523	0.635526	0.622007	0.626284	0.666425	0.675492	0.698318	0.684551	0.729154	0.678096	0.702398
0.882988	0.887039	0.892931	0.881226	0.8695	0.883453	0.871611	0.864602	0.848452	0.858706	0.832568	0.84394	0.873316	0.842611	0.863908	0.865862	0.877863	0.896629	0.899975	0.908427	0.904966	0.908395	0.912024	0.913979	0.910682	0.918796	0.904469	0.919629	0.914652	0.893358	0.915307	0.917279	0.899137	0.906604	0.910432	0.910206	0.940836	0.94401	0.965471	0.971363	0.97007	0.972426	0.932384	0.940618	0.916409	0.86782	0.885924	0.904036	0.87989	0.895216
0.666704	0.671377	0.648897	0.660602	0.660121	0.661149	0.648262	0.660698	0.653042	0.669382	0.658557	0.677152	0.693035	0.647963	0.620351	0.625492	0.62106	0.642885	0.640112	0.621687	0.636329	0.637005	0.663833	0.664642	0.64208	0.621	0.634234	0.648043	0.662467	0.599449	0.609684	0.651709	0.639023	0.65623	0.681943	0.663476	0.645982	0.619682	0.679608	0.639226	0.652353	0.647729	0.660863	0.66453	0.679958	0.668449	0.663435	0.661113	0.654115	0.639442
1.1436	1.06276	1.06773	1.07274	1.10121	1.11113	1.08342	1.00128	1.04504	1.04098	1.11705	1.09628	1.13513	1.12734	1.10027	1.07448	1.11333	1.03291	1.09997	1.10324	1.08487	1.08693	1.15305	1.12353	1.0912	1.06048	1.0682	1.06031	1.06338	1.09253	1.07732	1.15907	1.13532	1.13738	1.19647	1.19038	1.22367	1.21244	1.16343	1.29294	1.22283	1.1569	1.19977	1.17998	1.20793	1.13767	1.15309	1.15616	1.08491	1.09995
1.13366	1.13771	1.19169	1.13314	1.16844	1.08575	1.03226	0.958375	0.979019	1.00767	0.99408	0.987993	0.876088	0.928866	0.916941	0.984608	0.905311	0.821858	0.860529	0.898681	1.02226	1.0023	0.983097	0.964619	0.95994	0.974652	0.906648	1.00435	1.10642	1.05832	1.10519	1.05098	1.106	1.15414	1.13449	1.1202	1.13255	1.47232	1.45253	1.63873	1.64187	1.59332	1.47307	1.27987	1.34232	1.10654	1.10971	1.02501	1.12829	1.19846
2.55127	2.56745	2.47736	2.67477	2.29373	2.57893	2.20557	2.21223	2.33945	2.98236	3.00411	2.47411	2.88164	2.43899	3.43333	4.06465	3.4551	2.51713	3.32075	2.00417	2.57334	3.59401	3.25982	3.14425	3.16304	3.18206	3.2013	2.67298	2.99232	3.39832	3.93178	3.13798	3.59968	3.62368	3.44156	2.39792	1.83996	2.22786	2.82301	3.85205	2.23925	3.23772	3.40769	3.5965	3.80746	3.36388	2.81995	2.74918	2.68187	2.61777
0.792754	0.795191	0.819523	0.859578	0.880724	0.851483	0.945174	0.818344	0.808286	0.749876	0.865062	0.785127	0.845486	0.781626	0.726735	0.806081	0.680531	0.704676	0.695404	0.660856	0.629579	0.717997	0.735152	0.632495	0.673183	0.648567	0.66118	0.672714	0.643787	0.671198	0.705259	0.712641	0.705361	0.780562	0.708031	0.731831	0.757288	0.677708	0.735277	0.670861	0.667222	0.748209	0.73509	0.749821	0.730403	0.653756	0.635055	0.693322	0.611317	0.636441
1.20952	1.26197	1.22152	1.21915	1.31788	1.28231	1.28281	1.27874	1.28739	1.28048	1.2684	1.30088	1.31602	1.30068	1.28172	1.26331	1.2795	1.27551	1.28225	1.25883	1.26643	1.30333	1.25246	1.26851	1.31614	1.3249	1.38659	1.34345	1.31441	1.34379	1.33359	1.38796	1.44696	1.42006	1.42322	1.39252	1.39862	1.42337	1.47244	1.42492	1.43042	1.44559	1.40627	1.42804	1.43438	1.47916	1.38759	1.4168	1.36046	1.39208
1.24181	1.23361	1.23942	1.2285	1.16771	1.24348	1.23454	1.1993	1.28272	1.31327	1.2683	1.22962	1.24392	1.31736	1.4	1.27922	1.33525	1.26012	1.22158	1.28656	1.2988	1.40766	1.32485	1.3195	1.42243	1.33255	1.33448	1.32276	1.41457	1.42037	1.41884	1.37527	1.34516	1.50816	1.43786	1.35181	1.31385	1.44247	1.37738	1.3788	1.41407	1.46519	1.39598	1.44672	1.37577	1.43813	1.48822	1.56247	1.47463	1.60387
3.69255	3.96059	3.93131	3.83789	3.89153	3.9752	4.06255	4.15382	3.88433	3.60503	3.95379	4.33612	3.95744	3.45667	3.53376	3.77925	3.64784	3.64486	3.44639	3.61397	3.57192	3.95366	3.61299	4.97082	4.09948	3.48805	3.79069	3.29347	3.8461	3.60786	3.62129	3.53136	3.72054	3.67323	3.95251	3.80504	2.91543	3.60812	2.98333	3.99152	3.81016	3.89021	3.80636	4.22914	3.96915	3.25575	4.11849	3.31331	2.60763	2.94581
1.08747	1.13379	1.12444	1.09507	1.07486	1.05538	1.04537	1.05389	1.02262	0.99316	1.009	0.997403	0.986066	0.943714	0.917743	0.881077	0.87472	0.856392	0.858642	0.847858	0.810478	0.813103	0.790217	0.782533	0.774996	0.795634	0.779384	0.776781	0.791649	0.775726	0.803813	0.790303	0.774077	0.808438	0.789524	0.792122	0.7998	0.792778	0.807164	0.821076	0.868415	0.856342	0.843352	0.884732	0.879613	0.89287	0.907107	0.905847	0.92052	0.959811
0.512738	0.516987	0.512145	0.507168	0.51226	0.503475	0.502752	0.516106	0.500945	0.504939	0.508998	0.51408	0.508574	0.503249	0.505152	0.51595	0.513983	0.51698	0.513828	0.510486	0.50778	0.505103	0.502224	0.505873	0.509576	0.513333	0.517146	0.521016	0.524945	0.528933	0.532982	0.537094	0.525837	0.533448	0.514364	0.522494	0.519706	0.523239	0.511935	0.512279	0.519843	0.529836	0.532602	0.526887	0.522235	0.531727	0.535002	0.551559	0.51417	0.532522
5.87157	6.42304	6.51193	6.22301	6.57743	6.50797	6.84427	6.94225	7.15393	7.02546	7.04895	6.75844	7.05388	7.08532	7.61996	7.44286	6.90536	7.18589	6.69793	6.99031	6.71631	6.62454	6.53623	7.19361	7.20293	6.68402	6.25807	6.145	6.04001	6.20741	6.68866	6.05025	5.98668	6.02453	5.70038	5.82883	5.37693	5.6312	5.73571	6.19296	6.73834	6.28813	5.75594	6.56666	6.33037	6.35713	6.59405	6.33614	6.97458	6.69479
																		0.507495	0.504907	0.506104	0.500709	0.505533	0.510451	0.515466	0.520581	0.510135	0.5001	0.500088	0.500076	0.500063	0.509966	0.509797	0.509628	0.509458	0.509289	0.509121	0.508952	0.508783	0.508615	0.508446	0.508278	0.50811	0.507942	0.507774	0.507606	0.507438	0.507271	0.507103	0.506936
0.992279	0.962465	0.988776	0.998531	0.940432	0.953873	0.897026	0.902148	0.906749	0.919991	0.899948	0.925082	0.915651	0.936759	0.925397	0.895113	0.873585	0.889745	0.881615	0.861369	0.833398	0.782899	0.829695	0.802648	0.786503	0.785932	0.799626	0.753072	0.770839	0.809879	0.770944	0.833972	0.842931	0.872037	0.852698	0.817159	0.843947	0.872907	0.872735	0.913358	0.899733	0.92745	0.888349	0.900562	0.880607	0.930789	0.885086	0.878534	0.926544	0.886902
0.780831	0.812794	0.804328	0.824617	0.845956	0.776862	0.755774	0.805953	0.786504	0.817263	0.793698	0.771454	0.750423	0.72387	0.736049	0.748645	0.756785	0.770051	0.738851	0.74338	0.747965	0.748034	0.748104	0.770844	0.786975	0.843169	0.978755	0.889598	0.900706	0.899395	0.866044	0.919558	0.936347	0.927362	0.911549	0.918061	0.929256	0.947426	0.985764	0.936918	1.00032	0.983976	0.947109	1.01549	0.99588	0.957417	0.975786	0.984493	0.9886	0.987158
1.85381	1.84775	1.84172	1.63175	1.98005	1.80507	1.69021	1.6394	1.73447	1.69224	1.71567	1.61965	1.7414	1.75422	1.64856	1.68513	1.7461	1.51696	1.71925	1.72612	1.73271	1.66918	1.65341	1.5054	1.58817	1.45827	1.54533	1.63754	1.68397	1.3793	1.50119	1.63413	1.71397	1.73032	1.70243	1.6849	1.90791	1.70005	1.74092	1.72134	1.74807	1.61821	1.70067	1.60742	1.49234	1.6214	1.46246	1.61168	1.45842	1.37312
0.675909	0.683463	0.651555	0.670257	0.66175	0.666637	0.652931	0.655127	0.642732	0.688027	0.658037	0.662329	0.65394	0.650392	0.671407	0.662266	0.658757	0.651246	0.653153	0.655032	0.653633	0.65527	0.649973	0.638968	0.672345	0.693208	0.652625	0.654439	0.658094	0.664328	0.64984	0.646211	0.693549	0.693011	0.666843	0.701716	0.649613	0.678607	0.673885	0.680689	0.679876	0.638368	0.652935	0.637356	0.630887	0.636206	0.682668	0.679956	0.664169	0.674297
0.643829	0.659422	0.646122	0.631039	0.653859	0.677997	0.639487	0.631528	0.621771	0.648257	0.645668	0.639141	0.642476	0.649883	0.667756	0.654301	0.663013	0.667195	0.662893	0.671725	0.65247	0.657241	0.659505	0.64209	0.641271	0.640481	0.648795	0.654646	0.652162	0.662075	0.65072	0.657033	0.674174	0.663537	0.670775	0.647565	0.656408	0.657917	0.650612	0.660158	0.63575	0.640316	0.653018	0.641076	0.656692	0.656364	0.675177	0.666778	0.665761	0.650464
0.617238	0.596478	0.595391	0.593101	0.600137	0.58918	0.590303	0.597382	0.593594	0.574113	0.570232	0.555145	0.563015	0.551305	0.548677	0.539102	0.524609	0.520693	0.503178	0.513972	0.512213	0.507014	0.501919	0.503898	0.51437	0.511505	0.508671	0.505869	0.503097	0.511813	0.5131	0.540679	0.540445	0.539037	0.55904	0.580586	0.603859	0.629076	0.65649	0.686403	0.719172	0.796033	0.891289	0.810008	0.822203	0.83477	0.846653	0.85888	0.871465	0.776339
7.93402	8.21194	8.83448	8.65918	8.48569	7.82381	8.24058	8.48247	8.12096	8.80649	8.17249	8.85824	8.52205	8.36242	8.52378	8.86907	8.97823	8.21449	9.21868	9.45269	9.34146	8.55065	8.80734	9.00104	8.53626	7.53028	7.17288	7.22951	8.77253	8.5253	8.81973	6.01463	7.52545	7.9056	8.88756	6.92938	8.43464	8.40008	7.20087	8.70432	8.39405	8.46083	8.59134	8.6004	7.49277	6.88938	7.10728	6.85003	7.25024	6.5951
1.71381	1.66051	1.73529	1.84933	1.83699	1.75564	1.39863	1.50001	1.8726	1.82071	1.74676	1.97004	1.83732	1.94477	2.1351	1.99306	1.90591	1.83921	1.90408	1.91935	1.73479	1.97022	1.74912	1.69278	1.87926	1.8876	1.81376	1.63647	1.85012	1.4396	1.47522	1.5683	1.6215	1.71063	1.61767	1.58664	1.47705	1.57248	1.67211	1.59424	1.7131	1.7248	1.54994	1.80698	1.62643	1.64238	1.6831	1.6726	1.70521	1.74087
0.884309	0.882079	0.861464	0.858335	0.878738	0.866258	0.862885	0.880686	0.865906	0.87135	0.861603	0.855208	0.84789	0.829157	0.832666	0.871169	0.853516	0.82694	0.804933	0.83652	0.813198	0.795082	0.829287	0.847172	0.875871	0.834399	0.776328	0.779279	0.771799	0.749834	0.788227	0.784124	0.774533	0.788822	0.757981	0.780521	0.747839	0.759074	0.765634	0.762029	0.798072	0.799081	0.798407	0.818887	0.815012	0.852795	0.822704	0.833387	0.783691	0.856881
0.944834	0.95362	0.855061	0.818914	0.843768	0.889461	0.787165	0.770663	0.743298	0.766103	0.741066	0.726078	0.730908	0.713625	0.702557	0.707892	0.690498	0.69689	0.729608	0.703974	0.705514	0.69937	0.725688	0.73552	0.738056	0.746199	0.748226	0.757841	0.73069	0.728526	0.734694	0.76741	0.796221	0.7753	0.812139	0.773131	0.807673	0.795859	0.773009	0.764613	0.801187	0.811448	0.84324	0.85537	0.861589	0.851615	0.847005	0.845722	0.864911	0.827676
0.81976	0.849156	0.834631	0.843576	0.829815	0.803976	0.83252	0.818571	0.780995	0.803409	0.776189	0.730439	0.752842	0.745336	0.760061	0.738315	0.793618	0.715837	0.706138	0.735628	0.727207	0.749181	0.748394	0.725421	0.699951	0.728626	0.739071	0.733257	0.716416	0.721143	0.721744	0.690299	0.720638	0.742085	0.713906	0.718532	0.723014	0.743757	0.749642	0.754625	0.730471	0.750849	0.7657	0.679365	0.620751	0.681356	0.671639	0.750274	0.712578	0.724275
0.753623	0.765501	0.791051	0.769491	0.777706	0.771579	0.760163	0.761565	0.757935	0.774338	0.76892	0.778858	0.750483	0.802167	0.816141	0.808907	0.76401	0.793634	0.787234	0.82949	0.779802	0.82603	0.83234	0.812769	0.830913	0.844591	0.83232	0.850029	0.83777	0.830107	0.812529	0.842265	0.874261	0.860544	0.891664	0.883933	0.892544	0.922149	0.890665	0.903494	0.891644	0.88367	0.885731	0.894101	0.916929	0.927428	0.910776	0.894192	0.891102	0.898595
1.11439	1.15484	1.1697	1.17037	1.16855	1.18451	1.2009	1.21776	1.20401	1.19056	1.1774	1.16454	1.15195	1.10504	0.96434	1.00426	1.04762	1.0949	1.08939	1.08393	1.07853	0.907778	0.783702	0.689464	0.615458	0.642218	0.632108	0.606594	0.570315	0.538131	0.509386	0.512368	0.515386	0.51844	0.52153	0.524657	0.527822	0.531026	0.549164	0.580042	0.592835	0.606205	0.620192	0.605858	0.656164	0.614411	0.574368	0.595044	0.617265	0.614785
0.761571	0.758008	0.727974	0.740362	0.753179	0.766447	0.736666	0.720847	0.705693	0.776375	0.771446	0.735613	0.766562	0.7064	0.747374	0.724425	0.749373	0.744185	0.739068	0.786387	0.728588	0.757247	0.788253	0.783345	0.786214	0.793338	0.768049	0.823177	0.82264	0.813677	0.833774	0.828427	0.837131	0.853896	0.883631	0.901079	0.862524	0.910094	0.884538	0.860377	0.807398	0.855029	0.793519	0.76885	0.750441	0.876028	0.900936	0.791507	0.657465	0.562248
1.12064	1.15279	1.15282	1.4569	1.15951	0.96295	0.968403	1.00619	1.08449	1.02281	1.01145	1.12989	1.10901	1.0035	1.08329	1.09639	1.12569	1.16081	1.19818	1.07525	1.18075	0.998486	1.03639	0.960552	1.05567	1.08092	1.10741	0.929001	0.932803	1.12666	0.998007	1.21403	1.29894	1.13603	0.97246	0.866815	0.961153	0.899393	1.11428	0.963303	0.789979	0.784271	0.778645	0.773099	0.767632	0.762241	0.682493	0.703931	0.716585	0.770426
0.787348	0.854965	0.748251	0.754988	0.750647	0.773087	0.803207	0.758369	0.757764	0.748204	0.797579	0.803068	0.799471	0.777598	0.764931	0.758806	0.748934	0.748539	0.733812	0.732871	0.725551	0.726119	0.705234	0.698513	0.718582	0.713969	0.713645	0.709452	0.726763	0.708719	0.69439	0.746822	0.730663	0.746402	0.699038	0.719934	0.684142	0.713789	0.685696	0.674698	0.680723	0.666784	0.666681	0.659185	0.653145	0.652196	0.62582	0.632757	0.635786	0.640453
1.30921	1.34998	1.29205	1.23751	1.29476	1.31187	1.28424	1.30504	1.29823	1.26224	1.33756	1.29556	1.27794	1.35863	1.34518	1.21741	1.22979	1.26852	1.26012	1.17664	1.21427	1.25038	1.167	1.16495	1.09359	1.21333	1.13849	1.20299	1.22381	1.24973	1.18161	1.18411	1.25179	1.09089	1.10434	1.17719	1.2318	1.16187	1.13388	1.10532	1.11314	1.12107	1.23454	1.12222	1.02863	1.04778	1.08818	1.09482	1.10807	1.09014
0.71097	0.684527	0.676373	0.676287	0.674609	0.63968	0.666934	0.676798	0.656578	0.64348	0.671508	0.637526	0.610285	0.616709	0.595644	0.601482	0.601486	0.56253	0.605187	0.608333	0.611512	0.585761	0.620211	0.56273	0.598246	0.573387	0.604062	0.597583	0.608562	0.626831	0.596362	0.652293	0.627757	0.635962	0.68129	0.671805	0.669009	0.657195	0.657492	0.700627	0.674308	0.681155	0.686866	0.674478	0.676083	0.633251	0.683832	0.651924	0.669766	0.696045
1.02296	0.97672	1.03476	0.974075	1.05143	1.07065	1.28119	1.0644	0.972407	0.895049	0.883588	0.872416	0.864238	0.856213	0.877889	0.8572	0.837464	0.874586	0.91969	0.817933	0.823284	0.802522	0.782782	0.76399	0.729065	0.684095	0.688741	0.689669	0.678861	0.682553	0.716284	0.660382	0.648283	0.673371	0.635774	0.642727	0.649833	0.721026	0.710452	0.693353	0.725967	0.708243	0.724019	0.687161	0.602928	0.648848	0.66659	0.62766	0.570155	0.59975
0.874732	0.86702	0.863513	0.833824	0.907935	0.811107	0.820341	0.829788	0.940934	0.877585	0.836245	0.824225	0.83616	0.8485	0.827328	0.843806	0.866988	0.867657	0.898169	0.873744	0.862276	0.88512	0.906733	0.926385	0.913024	0.892087	0.864198	0.842736	0.894456	0.871779	0.846398	0.886271	0.845975	0.828201	0.843655	0.823048	0.818488	0.843497	0.870082	0.872596	0.909683	0.937251	0.927878	0.934293	0.943517	0.914879	0.922228	0.914715	0.952299	0.926956
0.788257	0.81816	0.803154	0.797709	0.775465	0.748734	0.738719	0.784229	0.791347	0.779276	0.833662	0.812061	0.849551	0.88716	0.813757	0.898148	0.80887	0.839017	0.83416	0.839486	0.788093	0.794317	0.798783	0.811007	0.819875	0.833901	0.760515	0.782428	0.745723	0.84293	0.845773	0.850697	0.811671	0.873807	0.909264	0.952266	0.903364	0.912088	0.938631	0.934009	0.943812	0.94132	0.987227	0.973973	0.950149	0.943694	0.969956	0.950421	0.966916	0.953081
1.46221	1.41907	1.41796	1.41297	1.36516	1.37015	1.3777	1.37639	1.42935	1.36553	1.40358	1.41016	1.41968	1.37453	1.41809	1.38608	1.37379	1.39659	1.44558	1.4398	1.37953	1.42628	1.5004	1.50566	1.44316	1.50571	1.48728	1.50259	1.47564	1.43326	1.38916	1.4639	1.4494	1.43119	1.44371	1.44591	1.42022	1.3933	1.5071	1.47394	1.49304	1.4927	1.47325	1.52043	1.44135	1.50677	1.43852	1.53157	1.42295	1.36936
0.613904	0.592023	0.596054	0.606423	0.592893	0.592666	0.611163	0.604179	0.596689	0.615086	0.599549	0.596647	0.587943	0.587407	0.589825	0.602954	0.604641	0.576558	0.566409	0.595063	0.592848	0.587818	0.591904	0.613421	0.597121	0.61044	0.615631	0.607845	0.609389	0.621478	0.616558	0.647617	0.617083	0.631038	0.628829	0.617121	0.639055	0.622987	0.630596	0.598552	0.595059	0.60127	0.611015	0.623381	0.630495	0.633696	0.638175	0.654012	0.660664	0.638111
0.64838	0.647129	0.660867	0.648162	0.633132	0.633404	0.642272	0.652	0.664453	0.655509	0.632339	0.627582	0.644131	0.643683	0.635453	0.665419	0.6445	0.644307	0.61711	0.656457	0.646266	0.640748	0.627607	0.625348	0.62385	0.622358	0.643326	0.601295	0.624126	0.600984	0.623792	0.58393	0.592178	0.616956	0.649213	0.650718	0.577937	0.630189	0.684689	0.672854	0.709853	0.706521	0.719693	0.715846	0.715764	0.704703	0.688735	0.695165	0.686413	0.652643
0.842218	0.83723	0.832301	0.814424	0.825514	0.816504	0.80769	0.800835	0.798668	0.796438	0.802028	0.791223	0.804397	0.80349	0.802586	0.812444	0.81157	0.813923	0.819963	0.80068	0.809732	0.81885	0.820455	0.819304	0.822302	0.811416	0.813079	0.81266	0.79845	0.813513	0.81992	0.795361	0.793683	0.803268	0.8134	0.803316	0.827134	0.826873	0.848908	0.844932	0.860879	0.890715	0.887748	0.88447	0.877758	0.867279	0.883193	0.872742	0.882254	0.872199
1.1784	1.18935	1.20051	1.2359	1.27344	1.21271	1.18195	1.25197	1.20686	1.22661	1.22078	1.21501	1.20929	1.20363	1.18154	1.19584	1.20115	1.20198	1.1983	1.1537	1.14851	1.15947	1.13825	1.15144	1.14631	1.13716	1.101	1.12742	1.10956	1.13667	1.14041	1.14418	1.14036	1.11346	1.11526	1.09476	1.08504	1.11147	1.09991	1.09941	1.09891	1.05671	1.088	1.15248	1.16058	1.15399	1.09047	1.14484	1.11841	1.16222
1.14225	1.13995	1.13766	1.13538	1.13311	1.12981	1.05871	1.11541	1.06908	1.03062	1.00498	0.996503	0.988165	0.988918	0.989672	1.0155	1.02072	1.03598	1.02153	1.00972	0.998183	1.00847	1.00735	1.00631	1.00559	1.04879	1.03299	0.994745	0.998118	1.0379	1.01089	0.985244	1.09003	1.06381	1.13861	1.13941	1.1402	1.08029	1.04385	1.13275	1.10902	1.08627	1.20294	1.04829	0.992604	0.948716	1.06812	1.05098	1.04734	1.12924
0.913914	0.926036	0.923226	0.950118	0.905516	0.970413	0.83219	0.904944	0.914889	0.871425	0.870148	0.888328	0.930796	0.868195	0.976942	0.909682	0.886966	0.859049	0.921937	0.922128	0.92946	0.898302	0.937806	0.908913	0.926293	0.908699	0.971012	0.872375	0.878726	0.951646	0.924634	1.08166	0.934777	1.03096	0.935261	0.927505	0.924965	0.886874	0.897077	0.891339	0.890744	0.877136	0.97161	0.963482	0.960268	0.952722	1.04731	0.947064	1.00077	0.934874
0.605617	0.653598	0.611613	0.63388	0.637678	0.630346	0.647316	0.649606	0.624272	0.576058	0.59819	0.626028	0.62324	0.613351	0.62756	0.616085	0.604246	0.632566	0.648191	0.6428	0.653572	0.693256	0.703837	0.697373	0.683768	0.683434	0.695038	0.709006	0.671398	0.68707	0.680884	0.695636	0.711618	0.697519	0.708826	0.710678	0.716418	0.690753	0.68865	0.689338	0.733238	0.714515	0.731418	0.749762	0.763175	0.744263	0.721603	0.752875	0.759	0.745996
1.14173	1.15171	1.1555	1.06275	1.10247	1.10073	1.07564	1.0592	1.04796	1.03593	1.04703	1.11374	1.09592	1.08651	1.09504	1.04889	1.09293	1.12344	1.11553	1.08125	1.18398	1.11582	1.10651	1.17416	1.10176	1.12331	1.13367	1.14419	1.19025	1.22824	1.27026	1.29239	1.27952	1.32146	1.34026	1.33215	1.31138	1.22142	1.2527	1.33962	1.26561	1.26553	1.24884	1.18468	1.20181	1.23508	1.18153	1.15711	1.16886	1.15575
0.797069	0.792668	0.775384	0.813574	0.794534	0.776365	0.741765	0.710118	0.743891	0.727288	0.723776	0.724517	0.736202	0.722764	0.743878	0.729572	0.727578	0.698343	0.732824	0.729112	0.738466	0.758536	0.733633	0.740462	0.74742	0.696514	0.686459	0.701055	0.69595	0.685453	0.689556	0.702502	0.704366	0.718982	0.705348	0.76565	0.710781	0.689981	0.691895	0.712151	0.693122	0.7261	0.696937	0.699665	0.70522	0.72069	0.726264	0.691026	0.701977	0.714284
																																						1.17768	1.19319	1.21153	1.18039	1.23454	1.20931	1.21588	1.20776	1.19975	1.19761	1.20798	1.18367
																																		3.85987	3.86913	3.87844	3.88779	3.89718	3.90662	3.78562	3.73826	3.85068	3.6581	3.37235	3.12269	3.34283	3.41072	3.41182	3.73764
1.34756	1.19292	1.07012	1.31986	1.72167	1.60416	1.90609	1.97412	1.93565	1.96512	1.89084	1.82526	2.05185	1.6903	2.1737	1.86871	2.00434	2.06502	2.1388	2.01062	1.6083	1.75846	1.94465	2.23738	1.91515	1.86874	1.86317	1.5806	1.99659	1.40584	1.62422	1.92293	2.02222	2.13765	1.679	2.31331	1.89465	2.38874	1.66393	2.05139	1.83553	1.7271	1.74359	1.72148	1.9834	2.01928	1.93118	1.61884	1.57065	1.52525
0.994015	0.982999	1.03171	1.076	0.938948	1.02617	1.01144	1.06051	1.06041	1.00091	0.96365	0.971154	0.990797	1.03097	0.957955	1.09346	0.973721	0.974986	0.984811	1.04907	0.997379	0.923738	0.939012	0.916087	0.948459	1.02541	1.06664	1.02426	1.14981	1.14654	1.26384	1.20965	1.21382	1.21802	1.32633	1.777	1.3489	1.44821	1.32983	1.14338	1.25374	1.38768	1.27848	1.26634	1.40673	1.46058	1.24317	1.3575	1.51766	1.48612
0.524959	0.525552	0.524192	0.52356	0.522929	0.5223	0.521673	0.521046	0.520422	0.519799	0.519177	0.518557	0.517938	0.517321	0.516705	0.516091	0.515478	0.514867	0.514257	0.513648	0.513041	0.50679	0.500689	0.502704	0.504735	0.513949	0.523505	0.507833	0.540046	0.528288	0.507778	0.54634	0.544181	0.532658	0.553869	0.579312	0.554062	0.576857	0.590466	0.622832	0.619571	0.612933	0.589583	0.57787	0.566896	0.583316	0.602555	0.596023	0.582966	0.5648
0.588629	0.619479	0.58739	0.612584	0.590609	0.588026	0.590019	0.58376	0.584471	0.583549	0.599753	0.589688	0.604324	0.589439	0.589033	0.594299	0.582129	0.594852	0.59848	0.601367	0.608012	0.598862	0.601134	0.600915	0.593128	0.592893	0.592491	0.585097	0.580733	0.606692	0.588071	0.604484	0.604331	0.592745	0.630398	0.629271	0.605613	0.60923	0.60715	0.593977	0.611143	0.602807	0.617677	0.607968	0.629429	0.611665	0.613308	0.614959	0.606522	0.613024
0.74043	0.764592	0.731929	0.702862	0.748173	0.729687	0.760945	0.745507	0.753445	0.749696	0.75339	0.745982	0.729506	0.731639	0.732193	0.716016	0.750345	0.740885	0.791288	0.780104	0.795854	0.78681	0.810169	0.828485	0.829695	0.830908	0.821749	0.81279	0.804024	0.79842	0.767768	0.731136	0.739259	0.747565	0.819794	0.804324	0.789426	0.820297	0.867845	0.85792	0.859073	0.879171	0.891809	0.901107	0.83714	0.828468	0.843642	0.787972	0.761194	0.769763
0.711071	0.712138	0.717543	0.735298	0.760571	0.734645	0.722097	0.762981	0.757671	0.75553	0.75087	0.759694	0.764664	0.752442	0.759668	0.743505	0.753196	0.756663	0.770231	0.776599	0.779782	0.786522	0.809509	0.761342	0.776493	0.826306	0.825513	0.81357	0.8049	0.83782	0.839483	0.85068	0.851147	0.840995	0.832448	0.869374	0.882197	0.865501	0.885327	0.909303	0.900309	0.891492	0.870419	0.831235	0.823969	0.843843	0.827596	0.821541	0.815574	0.819659
0.822711	0.823046	0.810894	0.810852	0.810102	0.820802	0.80729	0.808494	0.816443	0.822396	0.807768	0.811513	0.817147	0.82286	0.827933	0.83307	0.835483	0.83791	0.84035	0.842806	0.845275	0.836768	0.82843	0.815494	0.802956	0.790798	0.794693	0.766025	0.786989	0.777907	0.746297	0.778125	0.770419	0.749989	0.74774	0.74398	0.75486	0.768193	0.763564	0.776099	0.789053	0.791983	0.805651	0.808605	0.817141	0.828757	0.837159	0.818367	0.82882	0.824979
0.765558	0.714771	0.791702	0.680213	0.668327	0.661952	0.665874	0.677656	0.665669	0.668174	0.661746	0.631982	0.633477	0.651372	0.692559	0.668753	0.701744	0.74561	0.700564	0.731189	0.787033	0.78371	0.785823	0.777712	0.801247	0.770458	0.790318	0.79004	0.824304	0.771346	0.774672	0.764587	0.847623	0.742245	0.701463	0.841076	0.784842	0.744433	0.708404	0.77342	0.851576	0.758021	0.877065	0.848218	0.821207	0.732483	0.736889	0.731721	0.729207	0.703256
0.585637	0.615095	0.622396	0.589005	0.608363	0.574695	0.600119	0.588851	0.595863	0.577292	0.559464	0.568976	0.55759	0.570133	0.52684	0.543649	0.510138	0.54199	0.535477	0.527199	0.534186	0.534255	0.536449	0.520147	0.538586	0.532043	0.547186	0.544013	0.545873	0.567477	0.543006	0.591424	0.603294	0.64193	0.622945	0.607165	0.611899	0.611344	0.602699	0.606324	0.615818	0.625642	0.647866	0.666892	0.663394	0.657509	0.688481	0.670222	0.676377	0.712705
1.65887	1.83987	2.06703	2.03943	2.01256	2.78683	4.52932	3.2407	2.52292	2.11044	1.81388	1.87947	1.94997	2.02597	2.10813	2.19724	1.93418	2.13077	2.25265	1.90039	2.42628	1.64159	1.90655	1.75208	1.8921	2.10911	1.56722	2.35334	2.38185	2.35338	2.32558	2.22941	1.61824	1.27006	1.2639	1.25781	1.25177	1.24578	1.21435	1.18446	1.15601	1.1289	1.10303	1.07831	1.31339	1.67953	2.32872	2.81433	3.55582	4.8278
0.633674	0.581647	0.58076	0.588369	0.573958	0.600498	0.601692	0.605434	0.590316	0.576144	0.56904	0.578885	0.571341	0.597185	0.588841	0.596299	0.55945	0.563797	0.597138	0.562502	0.56644	0.565444	0.569049	0.573317	0.589111	0.589088	0.597855	0.602583	0.608298	0.622853	0.59663	0.627367	0.634046	0.634633	0.639002	0.615415	0.613171	0.656693	0.638063	0.643911	0.634414	0.641714	0.636674	0.678669	0.656194	0.656056	0.674973	0.686822	0.671862	0.68141
0.88364	0.905176	0.91582	0.918828	0.905511	0.93157	0.902262	0.893596	0.885465	0.975194	0.897962	0.894818	0.897502	0.884874	0.890867	0.899104	0.879355	0.887416	0.858092	0.882362	0.87737	0.856772	0.87596	0.883228	0.885468	0.867051	0.877737	0.898782	0.87471	0.879145	0.883625	0.901723	0.936769	0.937756	0.942389	0.936886	0.929983	0.947125	0.954866	0.926891	0.970221	0.959261	0.98359	0.985805	0.933764	0.939732	0.938277	0.951456	0.929581	0.944516
0.889235	0.861137	0.87516	0.891286	0.902314	0.902252	0.893804	0.891702	0.894925	0.887754	0.89178	0.891923	0.875628	0.886021	0.908286	0.915256	0.931575	0.918706	0.924363	0.918735	0.928045	0.918907	0.948092	0.931048	0.912851	0.908902	0.897093	0.904758	0.906864	0.907617	0.892199	0.885621	0.863932	0.89606	0.8804	0.895439	0.897298	0.898589	0.879927	0.886901	0.893726	0.908458	0.903083	0.910229	0.901716	0.881195	0.919014	0.918588	0.90311	0.920512
													0.526747	0.534895	0.5433	0.551972	0.560927	0.560112	0.559299	0.558489	0.557682	0.556876	0.556073	0.555273	0.554474	0.553678	0.552884	0.552093	0.6368	0.562223	0.588655	0.617696	0.608752	0.62853	0.649636	0.672209	0.65307	0.634991	0.575465	0.631566	0.597453	0.64256	0.585672	0.538037	0.585665	0.625788	0.624334	0.618441	0.625326
0.723996	0.732076	0.740186	0.764144	0.752409	0.74103	0.71972	0.757011	0.758409	0.744958	0.753333	0.741024	0.722117	0.749534	0.712406	0.734979	0.682507	0.713627	0.69201	0.703638	0.716079	0.730525	0.718959	0.730362	0.729927	0.709937	0.691013	0.696708	0.741365	0.711863	0.700096	0.700382	0.692027	0.730922	0.680556	0.705131	0.727586	0.707446	0.688391	0.698975	0.725944	0.7177	0.738389	0.746065	0.760591	0.787978	0.735441	0.752341	0.769099	0.731119
0.736266	0.702788	0.701146	0.680917	0.740105	0.710762	0.695923	0.683906	0.740971	0.7133	0.715436	0.708509	0.740444	0.704706	0.686651	0.676778	0.663157	0.681854	0.682495	0.683138	0.695772	0.755015	0.6764	0.672821	0.717197	0.757099	0.789685	0.726386	0.759749	0.735485	0.692461	0.772126	0.749924	0.799263	0.74605	0.769527	0.85046	0.781655	0.776141	0.802874	0.811892	0.826029	0.821593	0.975336	1.0379	1.03274	1.02764	1.02259	0.996073	0.917613
4.30317	4.23646	3.93722	4.47145	4.12706	3.70562	3.59492	3.79773	3.95566	3.92367	3.92744	3.66049	3.95206	3.56985	3.95332	4.22689	4.28144	4.33741	4.09204	3.92983	4.05038	4.49768	4.66336	4.66095	4.14557	4.15342	4.42233	4.15099	4.75205	5.12387	5.63501	4.75107	4.98263	4.91466	4.62236	3.66735	4.3623	4.33386	4.03868	3.84383	3.53809	3.04646	3.96738	3.70332	3.62679	4.0216	4.17018	3.81174	3.72362	3.07219
0.711307	0.741891	0.691236	0.713408	0.660165	0.710254	0.704474	0.697543	0.67799	0.719392	0.688548	0.704327	0.709885	0.690284	0.692373	0.663958	0.717835	0.701157	0.720252	0.723854	0.723209	0.682625	0.718386	0.717649	0.685074	0.723121	0.715743	0.71699	0.710595	0.720744	0.740679	0.708292	0.779513	0.706849	0.702884	0.804702	0.799818	0.760522	0.785276	0.763711	0.824747	0.81582	0.742261	0.795348	0.770578	0.733296	0.737585	0.73848	0.73131	0.69702
0.688185	0.689285	0.678229	0.649907	0.668735	0.62517	0.650096	0.638126	0.632865	0.61403	0.619921	0.630206	0.628011	0.623949	0.633239	0.654801	0.639502	0.647018	0.637067	0.629797	0.643765	0.617318	0.626895	0.6525	0.62631	0.622124	0.644245	0.630227	0.643444	0.622996	0.624218	0.65046	0.656815	0.653964	0.647651	0.719381	0.687709	0.671316	0.650817	0.66646	0.731112	0.673819	0.707847	0.711499	0.724256	0.725303	0.751109	0.746824	0.745816	0.775346
1.08384	1.06458	1.08347	1.07891	1.09861	1.09424	1.12886	1.08915	1.08213	1.09757	1.08918	1.06665	1.03233	1.02567	1.0429	1.0283	1.04653	1.03764	1.0249	1.00549	1.03271	1.02305	1.03048	1.03248	1.02936	1.02244	1.05145	1.03636	1.02489	1.0335	0.994886	1.02418	1.02081	0.979748	0.995441	1.01789	1.04485	1.01943	1.02362	1.02784	1.05745	1.03659	1.05365	1.03271	1.01258	0.976693	0.942308	0.981133	0.935705	0.927356
0.765307	0.790558	0.919803	0.750903	0.782112	0.814379	0.773003	0.862143	0.979911	1.29398	0.971747	0.778006	0.80854	0.914192	0.945679	0.820449	0.804984	0.776896	0.779113	0.796531	0.807131	0.753585	0.744472	0.819973	0.838068	0.85698	0.876765	0.78048	0.789536	0.811506	0.85947	0.914352	0.783927	0.893221	0.774645	0.780407	0.786255	0.802332	0.842545	0.827218	0.812438	0.798177	0.822744	0.829943	0.864331	0.846183	0.770407	0.767071	0.770654	0.765985
0.839327	0.791956	0.805668	0.812912	0.84731	0.851829	0.850517	0.821002	0.841061	0.812331	0.824639	0.817313	0.810115	0.803044	0.831705	0.833871	0.799252	0.839575	0.814495	0.8216	0.817982	0.827389	0.83355	0.833672	0.818817	0.822138	0.727971	0.821824	0.80945	0.804834	0.813932	0.731492	0.869439	0.887375	0.866746	0.934985	0.956456	0.969869	0.980138	1.01137	0.971619	1.01679	1.01533	1.0421	1.06798	1.03686	1.00751	0.931474	1.01368	1.04318
0.675584	0.644002	0.655293	0.664871	0.639299	0.660892	0.666777	0.655271	0.667424	0.658287	0.66645	0.642727	0.654086	0.649545	0.665567	0.660898	0.670258	0.646752	0.68335	0.672364	0.656587	0.669911	0.67478	0.670528	0.66848	0.67671	0.6721	0.687444	0.68004	0.668102	0.66472	0.688294	0.682974	0.677735	0.672576	0.667495	0.665426	0.663369	0.661324	0.659292	0.657273	0.655266	0.658511	0.661789	0.648847	0.648447	0.657566	0.650276	0.652458	0.654655
0.584696	0.606878	0.552033	0.596182	0.614989	0.597577	0.581125	0.565553	0.550795	0.547939	0.545112	0.542314	0.537987	0.545893	0.521505	0.520402	0.546164	0.542759	0.522258	0.52587	0.529533	0.531564	0.53361	0.506627	0.528885	0.532571	0.547438	0.554826	0.563343	0.545843	0.556	0.555532	0.591753	0.573053	0.545572	0.604468	0.599767	0.59177	0.584234	0.592738	0.601493	0.598927	0.596384	0.608395	0.620899	0.630734	0.59823	0.551071	0.56201	0.571208
0.6376	0.646538	0.68536	0.633223	0.64396	0.662622	0.630749	0.633855	0.636113	0.648939	0.589476	0.609562	0.6376	0.614272	0.636577	0.609672	0.651111	0.655032	0.658767	0.618033	0.664225	0.658062	0.677952	0.621878	0.690851	0.679096	0.645424	0.688174	0.638025	0.700347	0.674778	0.710585	0.688898	0.679947	0.642153	0.694681	0.706303	0.755903	0.763115	0.720326	0.709703	0.721699	0.698399	0.669817	0.707688	0.731182	0.69822	0.701062	0.695033	0.682693
0.941566	0.95742	0.976157	0.904111	0.977495	0.931606	0.914244	0.89941	0.8977	1.01123	0.901004	0.938953	1.1548	0.904589	1.01742	1.30094	1.07568	0.916915	0.902243	1.02147	0.895379	0.916373	0.879122	0.881914	0.835726	0.831654	0.844548	0.930997	0.969996	0.957101	0.944544	0.932313	0.900411	0.860658	0.918386	0.894665	0.949261	0.894474	0.991559	0.947979	0.903768	0.863497	0.899776	0.9337	0.91492	0.872397	0.929332	1.28668	2.09051	1.35035
0.748022	0.748847	0.759442	0.76616	0.750164	0.763894	0.729744	0.736619	0.739423	0.723779	0.71007	0.725115	0.723434	0.694606	0.722967	0.719623	0.733093	0.702554	0.697815	0.675358	0.680372	0.68087	0.668896	0.688155	0.675048	0.684618	0.698521	0.71971	0.719119	0.70599	0.684104	0.7608	0.765221	0.734753	0.755588	0.743062	0.761952	0.751714	0.778869	0.749245	0.783882	0.773996	0.734587	0.715849	0.735112	0.744704	0.712406	0.699475	0.692341	0.713555
0.54058	0.546105	0.52788	0.548322	0.587283	0.554278	0.551566	0.548881	0.560768	0.527745	0.578471	0.530597	0.56426	0.54874	0.570905	0.557065	0.568931	0.5831	0.581776	0.590297	0.599785	0.576399	0.588966	0.567174	0.596961	0.582762	0.538554	0.533587	0.54835	0.544758	0.533977	0.548265	0.570615	0.553496	0.54311	0.56122	0.571904	0.595259	0.561623	0.554098	0.561456	0.56555	0.547601	0.562237	0.569055	0.57901	0.581429	0.560892	0.56606	0.56787
0.927226	0.914623	0.930116	0.896879	0.930017	0.924448	0.915044	0.93504	0.939594	0.936885	0.951525	0.946806	0.988306	0.981661	0.942299	0.934283	0.936879	0.917252	0.928075	0.945432	0.918878	0.942247	0.92232	0.950528	0.951311	0.943155	0.958871	0.944911	1.00273	0.976498	0.960078	0.960445	0.974171	0.986748	0.970583	0.996255	0.982848	0.990484	0.986097	0.985331	0.955549	1.02249	1.00017	1.01261	0.985858	1.02602	1.00043	1.06038	1.03684	1.06672
0.832361	0.896937	0.890222	0.871735	0.765475	0.800177	0.801325	0.733988	0.773799	0.76567	0.763942	0.745871	0.719346	0.710727	0.707288	0.730589	0.673657	0.697623	0.72509	0.732048	0.698048	0.731372	0.767529	0.753738	0.715187	0.736842	0.725516	0.6613	0.745317	0.695746	0.727447	0.791187	0.733945	0.773521	0.719696	0.790656	0.799008	0.809574	0.806661	0.803768	0.800494	0.797247	0.794025	0.833095	0.829716	0.811929	0.791785	0.828581	0.765436	0.758254
0.547911	0.590287	0.533632	0.599768	0.684615	0.799657	0.810318	0.821267	0.832517	0.844078	0.855966	0.868193	0.880774	0.893726	0.907064	0.920806	0.934971	0.949578	0.96465	0.980207	0.996274	1.01288	1.03004	1.0478	1.06618	1.08522	1.10495	1.12541	1.14664	1.16869	1.1916	1.21543	1.24023	1.26607	1.293	1.3211	1.35046	1.38115	1.55455	1.53047	1.50713	1.48085	1.45548	1.43096	1.40725	1.38432	1.36212	1.34062	1.45941	1.30867
1.0072	0.83541	0.797641	0.801609	0.805617	0.801151	0.822005	0.774931	0.781905	0.789004	0.785202	0.781437	0.777708	0.774014	0.76045	0.747354	0.734701	0.744753	0.755082	0.751973	0.748889	0.745831	0.742797	0.736575	0.730457	0.72444	0.718521	0.710394	0.702449	0.69468	0.704781	0.715179	0.72589	0.736926	0.748302	0.760036	0.772143	0.784642	0.797553	0.805175	0.812945	0.820866	0.828943	0.83718	0.845583	0.885961	0.856382	0.825789	0.844677	0.834505
0.950239	0.946745	0.951998	0.95436	0.93832	0.951796	0.969908	0.966528	0.969147	0.949029	0.939976	0.981766	1.00664	0.988982	0.983433	0.987454	0.983351	1.01059	0.960356	0.943551	0.975131	0.960949	0.959423	0.953894	0.983597	0.931285	0.980734	0.94721	0.955489	0.944046	0.949857	0.968774	0.942401	0.946711	0.949108	0.948632	0.950088	0.923486	0.941673	0.944668	0.937193	0.930711	0.929648	0.92562	0.912417	0.920654	0.918487	0.928271	0.924466	0.930091
0.584221	0.612617	0.585444	0.539487	0.596884	0.584298	0.580289	0.605579	0.58228	0.556585	0.530028	0.536397	0.562782	0.575571	0.577328	0.560133	0.543933	0.528643	0.564197	0.532713	0.565872	0.571249	0.560078	0.541307	0.564618	0.564557	0.559264	0.554069	0.544857	0.535946	0.527322	0.541786	0.557065	0.573231	0.590363	0.608551	0.627896	0.637512	0.647428	0.657657	0.741695	0.749753	0.641284	0.624532	0.725391	0.7284	0.668053	0.797266	0.806722	0.719243
0.622805	0.614287	0.598832	0.60703	0.618716	0.596675	0.62737	0.612256	0.623892	0.601795	0.611504	0.606006	0.593212	0.565957	0.569873	0.582937	0.573294	0.551528	0.55169	0.5676	0.555857	0.545606	0.543377	0.538871	0.549801	0.559924	0.538513	0.544335	0.535775	0.536435	0.525517	0.543193	0.542556	0.549318	0.509794	0.551926	0.57053	0.567283	0.573615	0.575095	0.577195	0.560139	0.568379	0.5783	0.55955	0.578914	0.59594	0.596903	0.617023	0.61675
0.779605	0.76332	0.760038	0.753926	0.736695	0.729515	0.732778	0.724531	0.724348	0.709974	0.71382	0.717768	0.704535	0.708119	0.713293	0.708008	0.695805	0.704809	0.702031	0.688443	0.689162	0.676743	0.6925	0.690018	0.684575	0.690317	0.697438	0.684944	0.689126	0.691055	0.688336	0.709949	0.703326	0.707981	0.694353	0.699826	0.699256	0.704028	0.703793	0.709654	0.72919	0.717696	0.724348	0.730105	0.724326	0.724698	0.716157	0.71493	0.723142	0.728285
																									0.544883	0.549046	0.553274	0.557566	0.538094	0.532613	0.54616	0.584353	0.584288	0.584224	0.58416	0.584095	0.584031	0.583967	0.583903	0.534138	0.529344	0.524635	0.520009	0.515464	0.510998	0.510688	0.510378	0.510069	0.50976
1.65015	1.62163	1.80777	1.39991	1.50713	1.35171	1.58364	1.55767	1.83402	1.88483	1.55847	1.37668	1.23287	1.23828	1.35184	1.2032	1.23665	1.32775	1.22677	1.2961	1.04501	1.23514	1.44837	1.3459	1.19855	1.33011	1.22669	1.33351	1.21941	1.25414	1.29252	1.35576	1.13545	1.30172	1.32714	1.31912	1.40365	1.38248	1.32704	1.39431	1.45257	1.41697	1.51728	1.53052	1.55782	1.51939	1.50273	1.53816	1.48605	1.52857
0.905951	0.870375	0.900508	0.891231	0.882144	0.890401	0.875743	0.87281	0.869896	0.843518	0.861661	0.84356	0.826204	0.840255	0.795352	0.771001	0.816096	0.792524	0.80227	0.834643	0.768043	0.827572	0.798386	0.771189	0.744196	0.808409	0.741595	0.759134	0.743991	0.74064	0.740085	0.784962	0.763484	0.774998	0.786865	0.799102	0.799073	0.799045	0.817548	0.836928	0.838547	0.826553	0.821807	0.824566	0.729106	0.758095	0.820704	0.756817	0.773385	0.795011
0.820736	0.784151	0.798371	0.771879	0.765829	0.774352	0.776924	0.787804	0.798993	0.818903	0.974619	0.971669	0.936178	0.885879	0.90664	0.87548	0.875222	0.892335	0.87471	0.864325	0.876711	0.85214	0.89129	0.846214	0.842392	0.842103	0.835048	0.860661	0.855308	0.892617	0.870608	0.882411	0.810599	0.84501	0.84138	0.830758	0.82044	0.813848	0.818896	0.842921	0.832918	0.850998	0.822205	0.82937	0.859765	0.83161	0.83884	0.836524	0.856325	0.838473
2.72867	3.17516	3.30528	3.44119	3.95366	2.92311	2.89097	2.48193	2.94818	2.83143	2.96486	2.67021	2.5029	3.00543	2.71959	2.81907	3.19327	2.7702	2.87021	3.01469	2.60432	3.09768	2.71292	2.62953	2.64677	3.82196	2.50233	2.642	3.31329	2.52131	2.36465	2.43912	2.61548	3.08489	2.73754	2.57907	2.55488	4.12645	2.9542	2.79553	2.82765	2.77648	2.86747	4.04379	4.02938	2.9131	2.96994	2.87855	3.22768	2.58107
0.658969	0.63947	0.653571	0.629664	0.637885	0.620668	0.609045	0.595859	0.593215	0.58778	0.603498	0.614324	0.601319	0.595198	0.607196	0.575472	0.595082	0.58892	0.572621	0.578726	0.592901	0.602868	0.592946	0.579693	0.597471	0.620124	0.603678	0.587008	0.598384	0.608196	0.616198	0.713904	0.724586	0.745789	0.726346	0.695628	0.723741	0.769249	0.752105	0.76022	0.768711	0.744895	0.740753	0.770401	0.756318	0.739882	0.748308	0.788605	0.770112	0.835753
0.859956	0.833992	0.823769	0.860751	0.808936	0.799954	0.800117	0.791874	0.799325	0.83172	0.825194	0.810571	0.827081	0.810542	0.803433	0.794662	0.82408	0.828785	0.82714	0.816271	0.827149	0.82904	0.813947	0.818458	0.803071	0.827576	0.860669	0.794521	0.82952	0.811841	0.832777	0.847824	0.865583	0.82907	0.860206	0.885591	0.900965	0.895204	0.928074	0.937757	0.917827	0.854155	0.905193	0.864244	0.857207	0.850282	0.843469	0.878067	0.861354	0.868325
0.784886	0.785044	0.739385	0.756838	0.744019	0.745013	0.746009	0.718254	0.787417	0.737288	0.728242	0.749304	0.748095	0.760147	0.74264	0.727254	0.715894	0.727585	0.692571	0.689065	0.690665	0.700193	0.716149	0.688933	0.716482	0.687971	0.693738	0.694724	0.693829	0.668349	0.691756	0.697819	0.700522	0.685561	0.682952	0.707735	0.67986	0.672102	0.654315	0.687894	0.673932	0.715265	0.712577	0.70991	0.69758	0.704233	0.711015	0.678684	0.649165	0.680194
																																														2.7113	2.90784	2.50124	2.89829
0.650001	0.649798	0.632424	0.63236	0.614695	0.631636	0.645655	0.645564	0.651176	0.656072	0.680461	0.665791	0.658034	0.650456	0.659172	0.675556	0.644713	0.680325	0.655852	0.674792	0.654884	0.676138	0.644588	0.608645	0.643085	0.64375	0.643506	0.67403	0.665867	0.658275	0.679658	0.729762	0.746955	0.756603	0.744397	0.748832	0.779407	0.769926	0.760673	0.780671	0.706051	0.79296	0.751473	0.755355	0.759277	0.76324	0.767245	0.716391	0.74895	0.749883
0.879533	0.884734	0.976082	1.04746	0.933845	1.00936	1.02197	1.00032	0.845583	1.0489	1.05684	0.954105	0.894023	0.910482	0.920036	0.855981	0.842463	0.897891	0.830682	0.821357	0.862751	0.794616	0.893738	0.83324	0.860836	0.784012	0.835818	0.859353	0.80142	0.835395	0.911203	0.982491	0.993427	0.91672	0.950559	0.928625	0.864676	0.966668	0.865101	0.923855	0.891247	0.948919	0.922047	0.899877	0.892572	0.846377	0.858286	0.878905	0.912457	0.907472
0.690615	0.748361	0.702678	0.751964	0.724992	0.726005	0.745419	0.752124	0.721934	0.738835	0.725602	0.749538	0.743443	0.752815	0.742424	0.773794	0.721761	0.721605	0.692309	0.689653	0.734187	0.688753	0.647214	0.647323	0.667122	0.667992	0.681426	0.689128	0.655417	0.64453	0.661991	0.697848	0.705978	0.688334	0.712988	0.704748	0.734208	0.711562	0.716193	0.744183	0.80779	0.736429	0.76104	0.739049	0.70604	0.767411	0.772229	0.765518	0.814632	0.786753
4.87124	4.52295	3.18061	4.69138	4.83932	4.01039	4.77642	4.17287	3.6466	4.14869	4.1703	4.19213	4.06158	4.01102	4.16564	4.139	4.1127	4.01453	4.30617	4.81579	3.79046	4.17528	4.64323	4.31775	4.52678	4.51687	4.73807	4.96164	4.85346	4.57355	4.73583	4.91005	4.80461	4.63979	3.943	4.10948	4.29064	4.48851	4.54459	4.60209	4.66106	4.85524	4.81256	4.77063	4.45352	4.67544	4.56582	4.61507	4.66539	4.85357
0.866461	0.866942	0.849607	0.828326	0.822971	0.837303	0.8137	0.784563	0.783447	0.810194	0.82541	0.841209	0.857624	1.03463	0.970257	1.10599	1.28587	1.33858	1.44282	1.56466	1.70898	1.88262	1.27201	0.960481	0.844166	0.978343	1.16324	1.22738	1.29902	1.37953	1.47069	1.57474	1.69464	1.83431	1.49268	1.13525	0.915927	0.99244	1.0767	0.884627	0.964316	0.8695	1.0591	1.04418	0.89382	0.868306	0.932007	0.845593	0.964628	0.90494
0.908276	0.830779	0.950337	0.890834	0.928882	0.914129	0.845571	0.783136	0.874632	0.903132	0.943559	0.929991	0.923516	0.924505	0.847211	0.922754	0.871032	0.850054	0.80348	0.874569	0.877881	0.808669	0.883237	0.729038	0.783621	0.821967	0.835532	0.845444	0.750218	0.77366	0.759932	0.678183	0.741639	0.765587	0.678485	0.702807	0.624844	0.733491	0.672047	0.69314	0.790326	0.721912	0.742009	0.757984	0.762659	0.806669	0.81224	0.7989	0.799772	0.82493
0.681918	0.686905	0.699211	0.696764	0.694463	0.691292	0.686565	0.670479	0.686818	0.691425	0.695135	0.699379	0.704907	0.711417	0.688964	0.702871	0.698885	0.723286	0.695154	0.68739	0.70909	0.710421	0.728277	0.707482	0.708631	0.710139	0.707729	0.698766	0.677296	0.672042	0.692994	0.74656	0.724063	0.700156	0.70137	0.710308	0.690685	0.719827	0.71996	0.728543	0.730593	0.74012	0.734627	0.764529	0.767085	0.735358	0.728364	0.765017	0.763355	0.787388
0.626142	0.651198	0.695904	0.67219	0.650039	0.645448	0.605944	0.56922	0.571704	0.577889	0.569677	0.581302	0.563285	0.576324	0.572904	0.593685	0.578737	0.585719	0.586006	0.622427	0.666727	0.604945	0.621318	0.569665	0.589671	0.619632	0.558647	0.50859	0.542372	0.58096	0.59267	0.617431	0.675321	0.615493	0.70815	0.713201	0.765286	0.747652	0.769137	0.747563	0.714018	0.806141	0.680293	0.743335	0.678672	0.746627	0.717781	0.707427	0.727985	0.735731
0.74461	0.720507	0.724471	0.715806	0.745297	0.758155	0.753084	0.74868	0.71658	0.733348	0.740384	0.727186	0.738746	0.741321	0.721869	0.739345	0.741702	0.716682	0.713356	0.717168	0.718461	0.732258	0.738439	0.735592	0.734103	0.720562	0.735835	0.740926	0.731032	0.713678	0.715761	0.715824	0.693575	0.712862	0.675388	0.658129	0.606693	0.642498	0.63045	0.62503	0.635763	0.646873	0.688394	0.675203	0.627973	0.614274	0.631473	0.589343	0.604439	0.587467
0.777118	0.777082	0.818729	0.770559	0.786621	0.756652	0.738419	0.78923	0.799869	0.784981	0.806026	0.797099	0.784796	0.800265	0.760342	0.779322	0.793706	0.767635	0.795263	0.790387	0.772942	0.781	0.781228	0.804817	0.755485	0.758978	0.779489	0.763598	0.777362	0.764513	0.766112	0.778967	0.76238	0.808616	0.818658	0.822422	0.837686	0.854366	0.856847	0.865954	0.899137	0.884473	0.882659	0.88362	0.900974	0.885989	0.898868	0.881465	0.845131	0.847348
																																								0.671105	0.719071	0.706671	0.694691	0.683111	0.671911	0.661072	0.650577	0.64041	0.630556
1.02707	0.920459	0.934376	1.03514	0.952534	0.890906	0.991531	0.890768	0.898607	0.852453	0.996234	0.918014	0.895819	0.854744	0.864791	0.929929	0.907476	0.903298	0.902663	0.937551	0.981847	0.988292	0.96496	0.918012	0.988034	0.90349	0.92541	0.94842	0.986503	1.0142	0.988912	1.04699	1.11231	0.955542	1.0891	1.07521	1.08762	1.07036	1.07859	1.08226	1.04051	1.14956	1.01846	1.09538	1.08819	1.02693	1.13407	1.12385	1.1138	1.1749
1.81624	1.89801	1.91571	1.85184	1.87776	1.86061	1.84446	1.86662	1.91817	2.02311	2.03894	1.95396	1.92917	1.92145	1.93718	1.92224	1.8669	1.79538	1.82834	1.96104	1.96921	1.81315	1.93604	1.98358	1.99344	2.00369	1.94997	1.94359	1.95417	1.9914	1.93307	2.05274	2.0681	2.06982	2.10415	2.46199	2.38106	2.49377	2.45576	2.53735	2.41832	2.3971	2.3535	2.24916	2.46259	2.25623	2.24709	2.35764	2.34472	2.37386
1.08367	1.05453	1.07646	1.04813	1.04964	1.05373	1.06518	1.06254	1.06693	1.06681	1.09574	1.10107	1.12026	1.11398	1.11862	1.12144	1.12109	1.13644	1.11743	1.12976	1.14981	1.15492	1.1382	1.1339	1.14068	1.12992	1.12849	1.13218	1.1166	1.12947	1.13122	1.14201	1.15612	1.22526	1.144	1.21209	1.20554	1.16051	1.14576	1.17509	1.17766	1.16758	1.20525	1.18187	1.20082	1.20453	1.20749	1.20903	1.2584	1.18062
0.842617	0.827348	0.83325	0.836799	0.826945	0.846272	0.834312	0.844074	0.818343	0.853095	0.811185	0.803483	0.81987	0.808556	0.813868	0.816174	0.841692	0.874303	0.865458	0.832375	0.825093	0.869611	0.861794	0.780797	0.81876	0.805235	0.785235	0.822807	0.780009	0.806334	0.766482	0.744085	0.756422	0.815258	0.785728	0.823673	0.83918	0.839708	0.829216	0.818983	0.809627	0.777415	0.787255	0.776543	0.766118	0.752318	0.735669	0.721699	0.711965	0.713871
0.50232	0.509796	0.516587	0.527008	0.512513	0.510085	0.524788	0.504757	0.525324	0.528979	0.513664	0.517962	0.53138	0.511323	0.526972	0.525256	0.522691	0.527399	0.529331	0.540971	0.50635	0.521162	0.537807	0.517456	0.512083	0.506363	0.505715	0.540356	0.515115	0.511218	0.507514	0.5163	0.518142	0.519999	0.534194	0.532381	0.534238	0.545809	0.546031	0.557277	0.563757	0.553802	0.584727	0.578344	0.590873	0.59227	0.595288	0.624238	0.6192	0.599487
0.530809	0.551172	0.544726	0.560002	0.567477	0.539769	0.533391	0.515954	0.526817	0.511005	0.538735	0.543499	0.54464	0.541267	0.539998	0.541875	0.542835	0.545586	0.551539	0.554385	0.567694	0.569201	0.557703	0.565518	0.563981	0.579472	0.566284	0.561029	0.562338	0.563595	0.549003	0.609032	0.60123	0.592525	0.593591	0.613711	0.589254	0.589045	0.595737	0.581291	0.568895	0.560838	0.570732	0.563672	0.574763	0.559691	0.541483	0.565989	0.554132	0.562221
1.07965	1.06525	1.05759	1.05004	1.08276	1.14413	1.06995	1.07664	1.07652	1.04088	1.00752	1.02809	1.06998	1.05334	1.08488	1.0928	1.10082	1.08478	1.07037	1.07598	1.08166	1.0874	1.06949	1.0859	1.10281	1.07213	0.975518	0.993184	1.00955	1.02646	1.0581	1.04231	1.02698	1.01209	1.06313	1.08296	1.0143	1.00403	0.959266	0.981362	0.965084	0.967247	0.949043	0.917276	0.889971	0.850629	0.821687	0.813177	0.828553	0.8617
1.04419	1.03134	1.02965	1.03473	1.02214	1.01246	1.02276	1.02117	1.00567	1.02433	1.03565	1.0277	1.01339	0.989373	0.994601	0.983923	1.00639	0.956092	0.990009	0.98416	1.0157	0.992999	0.985313	0.990602	0.979042	0.95918	0.992951	0.965737	0.995628	0.977321	0.92507	0.97214	0.975901	0.949947	0.936041	0.9714	0.96441	0.973915	0.955105	0.967721	0.965681	0.941524	0.987048	0.99237	0.972102	0.954764	0.971245	0.962533	0.975046	0.946615
0.813373	0.734507	0.729108	0.786414	0.776909	0.723615	0.744778	0.743167	0.741841	0.723397	0.715499	0.750793	0.80607	0.792163	0.692958	0.815441	0.78703	0.786197	0.786175	0.786154	0.786132	0.774017	0.779947	0.781416	0.769868	0.773426	0.777018	0.780642	0.784301	0.787994	0.791722	0.814647	0.823627	0.74624	0.645796	0.661102	0.677151	0.749463	0.775163	0.737343	0.703042	0.718972	0.738149	0.765857	0.683021	0.702121	0.770818	0.70815	0.701768	0.726229
1.01485	0.935297	1.0084	0.954684	0.928342	0.980744	0.998832	0.949527	0.959434	0.886084	0.956257	1.02702	0.966873	0.977875	0.991218	0.926684	0.949303	0.820872	0.917185	1.04113	0.8366	0.844699	0.919019	1.03914	1.06864	1.16904	1.26077	1.23788	1.22699	1.46165	1.49271	1.36651	1.29606	1.22516	1.10376	1.22036	1.20598	1.12017	1.06076	1.05548	1.1904	0.953186	1.0154	0.973101	1.0829	1.29303	1.60434	1.31016	1.10715	1.08003
0.778958	0.796384	0.75251	0.781073	0.778287	0.77686	0.786662	0.770837	0.782862	0.781914	0.795229	0.772263	0.797234	0.787627	0.731768	0.793231	0.787668	0.805669	0.808966	0.811419	0.761999	0.766526	0.838749	0.814394	0.802715	0.781809	0.841278	0.782166	0.822448	0.84476	0.846201	0.815538	0.917375	0.93446	0.891537	0.914699	0.973347	0.971922	0.974195	0.98733	1.00251	0.972937	0.97897	0.998222	1.01772	0.985634	0.984874	0.924288	0.962578	1.00418
0.867129	0.917497	0.974077	1.03809	1.11112	0.907377	0.963463	0.948537	0.795382	0.767093	0.844316	0.837057	0.777279	0.801815	0.734188	0.733808	0.790565	0.842131	0.823915	0.822721	1.07099	1.53387	0.937822	0.675376	0.725229	0.73053	0.735908	0.741366	0.72609	0.71143	0.697351	0.640999	0.645396	0.631003	0.641409	0.605958	0.632417	0.661293	0.649429	0.677191	0.69294	0.689386	0.689221	0.679974	0.665396	0.668737	0.695757	0.676824	0.705047	0.70542
1.03638	0.971857	0.949729	0.981318	1.01508	0.924088	1.05041	1.0169	1.09009	1.0745	1.001	0.997555	1.02922	0.966998	1.02102	0.951395	0.985628	1.02161	1.0624	1.02127	1.08983	1.0952	1.07645	1.06929	1.06967	1.09007	1.0961	1.07864	1.13904	0.988711	0.986694	1.04346	1.08445	1.07788	1.15785	1.13914	1.08576	1.16339	1.18473	1.19372	1.18827	1.1483	1.17743	1.14304	1.07157	1.13755	1.10668	1.13004	1.1463	1.04398
0.64347	0.611129	0.619971	0.611365	0.605734	0.641994	0.622536	0.604835	0.650315	0.629544	0.666263	0.653614	0.723861	0.710537	0.734094	0.773989	0.775278	0.797459	0.762745	0.794903	0.773815	0.784611	0.775502	0.754751	0.786979	0.800729	0.752787	0.761074	0.772221	0.769038	0.767022	0.77865	0.81963	0.811296	0.826415	0.817626	0.852854	0.890965	0.907588	0.952024	0.956372	0.976303	0.98544	0.962764	0.946726	0.991863	0.95494	0.979711	0.978888	1.00299
	0.549789	0.537426	0.526144	0.530465	0.580907	0.514253	0.517113	0.518847	0.525134	0.531054	0.509445	0.507032	0.504641	0.502273	0.507531	0.520715	0.532988	0.537504	0.52016	0.525998	0.53197	0.502799	0.536615	0.515802	0.517392	0.512048	0.506814	0.500241	0.501609	0.502984	0.504367	0.511369	0.518568	0.525973	0.533592	0.541436	0.532912	0.547324	0.564401	0.582577	0.513201	0.558075	0.569522	0.619305	0.538336	0.565827	0.557431	0.549281	0.581852
0.594836	0.555803	0.588839	0.590822	0.604673	0.603708	0.608401	0.593063	0.584797	0.585122	0.576138	0.603305	0.590585	0.581948	0.581042	0.577908	0.578694	0.59207	0.574592	0.558116	0.58696	0.604854	0.610359	0.609019	0.589653	0.579025	0.590303	0.577282	0.565927	0.564583	0.570019	0.603877	0.592918	0.571232	0.590952	0.580815	0.575889	0.595918	0.581299	0.591656	0.590775	0.595171	0.599632	0.597604	0.59559	0.59359	0.591603	0.589629	0.601382	0.628569
	0.83809	0.851654	0.825182	0.800307	0.842599	0.801295	0.828216	0.84592	0.864398	0.86391	0.863423	0.862937	0.862451	0.859792	0.857149	0.854523	0.869005	0.883986	0.880758	0.877553	0.874372	0.871213	0.869597	0.867987	0.866383	0.864785	0.863873	0.862963	0.862055	0.862248	0.862441	0.862634	0.862827	0.86302	0.863214	0.863407	0.863601	0.863794	0.867466	0.871169	0.874903	0.87867	0.882469	0.886302	0.901179	0.917962	0.889617	0.842393	0.812091
	0.766355	0.765806	0.765258	0.764025	0.750148	0.709716	0.727382	0.712559	0.701566	0.709928	0.700089	0.684917	0.698963	0.670547	0.6584	0.681062	0.677529	0.673007	0.668545	0.693742	0.655148	0.669419	0.664574	0.659799	0.675821	0.645558	0.652458	0.670744	0.690084	0.64918	0.685937	0.727106	0.773532	0.772793	0.812539	0.820263	0.839527	0.851697	0.854802	0.857929	0.862369	0.834098	0.808137	0.836287	0.818687	0.793801	0.786854	0.783179	0.776896
	0.979707	0.986038	0.992451	0.957269	0.970285	0.983659	0.984596	0.985535	0.978182	0.970938	0.963801	0.956767	0.949836	0.955551	0.943373	0.94276	0.942149	0.939731	0.953292	0.944574	0.932127	0.928436	0.932545	0.95611	0.95656	0.964168	0.944958	0.926938	0.903493	0.971296	0.939863	0.933955	0.888124	0.933155	1.01728	0.908893	0.92114	0.938823	0.957197	0.944017	0.899363	0.953787	0.954435	0.946085	0.952191	0.954218	0.96089	0.947339	0.955207
	0.887977	1.10713	1.09369	1.08058	1.06777	1.23341	1.1671	1.22071	1.14932	1.2586	1.31384	1.14683	1.17904	1.19852	1.29691	1.32691	1.29658	1.07632	1.18171	1.18804	1.19444	1.18899	1.18358	1.32648	1.3253	1.10391	0.9459	1.19103	1.18597	1.18094	1.17597	1.17103	1.16613	1.12721	1.0908	1.05667	1.4341	1.27753	1.15178	1.04857	1.00269	1.04639	1.13165	1.21379	1.08869	0.986963	1.07053	1.16956	1.06089
	0.812477	0.802263	0.807531	0.812402	0.795128	0.840742	0.823671	0.773631	0.783297	0.792851	0.803302	0.780773	0.767807	0.787783	0.789939	0.800022	0.806147	0.774799	0.786286	0.812242	0.799794	0.799674	0.843384	0.817009	0.810342	0.789619	0.807894	0.826554	0.769788	0.827388	0.859603	0.839748	0.883555	0.859363	0.836707	0.815216	0.821469	0.821149	0.779305	0.784301	0.789361	0.782131	0.780309	0.790541	0.816804	0.816891	0.787192	0.769824	0.765867
			0.708734	0.732535	0.704646	0.711136	0.717745	0.724479	0.746915	0.770784	0.796229	0.843346	0.896391	0.786052	0.693436	0.806649	0.820711	0.835273	0.813288	0.792431	0.772618	0.753771	0.737097	0.721145	0.779337	0.76031	0.752096	0.744058	0.805852	0.754617	0.769308	0.863552	0.984108	0.913035	0.851536	0.797799	0.775298	0.821105	0.872664	0.931132	0.997998	0.807346	0.797754	0.885703	0.995447	1.01965	0.956168	0.900126	0.85029
									0.841049	0.851067	0.861326	0.871835	0.882604	0.893642	0.871096	0.84966	0.829253	0.83348	0.833928	0.840931	0.942047	1.0708	0.911209	0.793016	0.784843	0.758775	0.774721	0.764695	0.776037	0.739119	0.825602	0.872088	0.887687	0.841884	0.860813	0.880611	0.901342	0.88443	0.899826	0.858349	0.855739	0.875178	0.897596	0.884251	0.871296	0.869754	0.843385	0.847768	0.852197
																												1.22163	1.19154	1.37584	1.238	1.29136	1.28771	1.37389	1.47759	1.46318	1.46615	1.58931	1.7816	1.58254	1.4235	1.17569	1.28127	1.126	1.14331	1.11019	1.11825	1.14206	1.44067
													0.600051	0.710766	0.87158	0.784132	0.712631	0.743	0.776073	0.782162	0.788347	0.794631	0.754166	0.81422	0.674768	0.576099	0.502605	0.58753	0.70699	0.688178	0.670341	0.653406	0.637305	0.621978	0.607372	0.593436	0.693201	0.833288	0.760312	0.699088	0.66918	0.717555	0.729029	0.756029	0.726598	0.689565	0.803277	0.803316	0.805699
															1.42874	1.43496	1.44123	1.41343	1.36756	1.39408	1.38945	1.23422	1.11019	1.00881	0.924395	1.11192	1.39491	1.29885	1.14912	1.03035	1.06926	1.22332	1.24002	1.232	1.20137	1.29478	1.28217	1.35642	1.33761	1.34286	1.25084	1.23198	1.099	1.12226	1.10389	0.958045	1.11122	1.19583	1.19565
																			0.975157	0.928347	0.757051	0.841922	0.949077	0.814031	0.679744	0.709102	0.74111	0.792287	0.698413	0.656475	0.705053	0.761395	0.827524	0.906232	1.00149	0.939368	0.908059	1.05783	1.26559	1.2972	1.33598	1.25005	1.03741	0.886594	0.721993	0.608941	0.618376	0.616322	0.615895
																					0.578857	0.572352	0.583139	0.568038	0.5537	0.540067	0.536912	0.533794	0.530712	0.549467	0.567708	0.587202	0.599233	0.598576	0.601156	0.578467	0.597776	0.59905	0.60033	0.600918	0.601508	0.615667	0.624052	0.632669	0.611471	0.609462	0.607466	0.603052	0.598703
																											0.722184	0.727524	0.724967	0.728335	0.708096	0.72835	0.75262	0.739516	0.727886	0.712345	0.729662	0.714591	0.700129	0.718594	0.73806	0.732622	0.766511	0.803687	0.794644	0.783346	0.803406	0.810757	0.818243
																																	0.689674	0.682774	0.684826	0.685531	0.686238	0.70544	0.703813	0.70206	0.714228	0.726826	0.741096	0.748721	0.756504	0.764451	0.772567	0.776288	0.780045
																																													1.01094	1.01638	1.02187	0.989008	0.969935
Tx dosing: 4mM Gluc 200ngIns
0.664325	0.683987	0.711548	0.683555	0.678154	0.719505	0.640373	0.720529	0.700951	0.621842	0.631296	0.581594	0.572847	0.502244	0.503865	0.508593	0.551304	0.527246	0.520651	0.511356	0.520438	0.528332	0.528292	0.528253	0.528214	0.528175	0.528135	0.528096	0.528057	0.528018	0.527978	0.527939	0.528556	0.585313	0.581666	0.619678	0.565221	0.653491	0.67927	0.669424	0.677717	0.64347	0.668501	0.687741	0.613128	0.639065	0.681447	0.626931	0.613953	0.682882
0.859527	0.838897	0.833161	0.806063	0.854323	0.81228	0.827537	0.834175	0.838017	0.839204	0.791242	0.783695	0.812596	0.84065	0.83952	0.833734	0.818812	0.828842	0.821998	0.794255	0.824486	0.817423	0.790656	0.775659	0.766125	0.779442	0.782078	0.760522	0.744731	0.740051	0.706841	0.783301	0.775695	0.741481	0.799033	0.789506	0.823167	0.827123	0.808686	0.898904	0.956147	0.902055	0.918618	0.877312	0.906313	0.907745	0.867207	0.939279	0.899994	0.914916
																								0.679807	0.674293	0.702155	0.703202	0.697502	0.691893	0.691212	0.708107	0.699244	0.683096	0.728226	0.750792	0.789834	0.827548	0.85549	0.891035	0.921497	0.991899	0.960883	0.960151	0.96525	0.97153	0.969639	0.980642	1.00436	1.04917
0.738238	0.731295	0.741112	0.700989	0.721717	0.732838	0.716079	0.7059	0.709313	0.688709	0.684645	0.687727	0.679643	0.683442	0.676458	0.684585	0.688611	0.693161	0.702501	0.691242	0.689895	0.675035	0.67297	0.675792	0.679944	0.686752	0.679654	0.684351	0.68343	0.688939	0.681233	0.722676	0.715435	0.727612	0.767119	0.825048	0.899371	0.964488	0.996968	1.02887	1.08733	1.10816	1.10241	1.08149	1.05873	1.05959	1.05054	1.03557	1.00733	1.00582
1.21886	1.19696	1.17995	1.15099	1.15496	1.0996	1.09052	1.1181	1.1104	1.13173	1.12735	1.15274	1.13623	1.14085	1.11892	1.12497	1.11479	1.13036	1.12578	1.09988	1.10191	1.1035	1.06033	1.02187	1.02884	1.02506	1.01846	1.02867	1.05178	1.04556	1.04539	1.07956	1.11438	1.11669	1.15947	1.13692	1.19208	1.21389	1.23046	1.25593	1.2704	1.28097	1.26154	1.33052	1.30197	1.32838	1.32866	1.36052	1.34385	1.3142
0.696319	0.700861	0.688881	0.714599	0.725683	0.708369	0.725544	0.724204	0.726126	0.715856	0.710937	0.721791	0.685207	0.714653	0.708879	0.699904	0.670864	0.692975	0.705601	0.683769	0.682076	0.66602	0.679751	0.693514	0.672295	0.683461	0.687219	0.685956	0.696967	0.680229	0.702218	0.711174	0.691966	0.695267	0.723503	0.703328	0.733199	0.727546	0.743192	0.75912	0.789092	0.770268	0.742538	0.752929	0.705202	0.760961	0.717521	0.711388	0.659903	0.707074
0.535021	0.558555	0.544034	0.501502	0.519921	0.539744	0.680156	0.919309	1.41784	3.09772	2.96704	3.58674	3.47672	3.10709	2.27803	1.68194	1.70913	1.95849	2.15808	2.12682	1.72683	1.79827	1.55746	1.25988	1.50831	1.87879	1.38996	1.47349	1.74855	1.68439	1.68492	1.87573	2.28879	2.9023	2.66219	3.26897	4.57399	4.49154	4.40938	2.12011	1.39556	1.0401	0.827644	0.948165	0.768697	0.733991	0.896272	1.04914	0.852502	0.717938
0.637316	0.643321	0.64248	0.643488	0.629239	0.622821	0.625394	0.619804	0.623131	0.627704	0.62159	0.609403	0.611791	0.611751	0.623243	0.619785	0.614331	0.617569	0.605058	0.606331	0.598553	0.599392	0.592462	0.588863	0.581419	0.582744	0.566311	0.574317	0.56705	0.561492	0.559837	0.572898	0.573869	0.591397	0.629187	0.700054	0.7499	0.801911	0.826942	0.863106	0.868149	0.865412	0.839418	0.825726	0.80662	0.794194	0.768547	0.775111	0.778254	0.780107
0.632069	0.646698	0.623148	0.630171	0.614351	0.631039	0.629692	0.594	0.604414	0.599833	0.614157	0.605424	0.613494	0.617	0.611691	0.604367	0.585352	0.583322	0.60081	0.582394	0.583879	0.577788	0.595356	0.603496	0.568212	0.589458	0.60891	0.598019	0.60955	0.601814	0.571017	0.607725	0.599825	0.633819	0.662643	0.731372	0.788105	0.85138	0.862231	0.880275	0.913366	0.905	0.910196	0.899303	0.867758	0.87786	0.848144	0.866513	0.874238	0.851794
0.769256	0.752941	0.768327	0.757519	0.761412	0.759797	0.763593	0.76063	0.745041	0.779595	0.782103	0.806812	0.821876	0.803428	0.814094	0.794226	0.79051	0.809844	0.814781	0.808878	0.807967	0.805587	0.789918	0.791906	0.786431	0.80225	0.774615	0.802138	0.803643	0.813265	0.803225	0.796294	0.821163	0.863231	0.88278	0.957573	1.01466	1.14794	1.20693	1.19997	1.1781	1.18046	1.16957	1.1269	1.0896	1.04623	1.01834	1.02383	1.01676	1.03277
0.992667	0.971887	0.969738	1.11427	0.986923	1.00327	0.96936	0.967049	1.01905	0.960779	0.965904	0.939563	0.928413	0.955802	0.952592	1.10505	0.987758	0.875857	0.929639	0.915093	0.953127	0.935735	0.926935	0.877433	0.925898	0.852936	0.902211	0.89944	0.885111	0.854906	0.886965	0.919996	0.906524	0.955877	1.05873	1.06793	1.16896	1.21694	1.23821	1.28185	1.30557	1.25895	1.24355	1.23236	1.21695	1.2484	1.22003	1.30271	1.31753	1.29542
0.621078	0.620494	0.632109	0.634886	0.633745	0.631172	0.63063	0.605752	0.596525	0.615934	0.620512	0.630022	0.609117	0.638238	0.6395	0.59119	0.57716	0.60362	0.614714	0.643734	0.600959	0.598775	0.593417	0.573956	0.572116	0.571001	0.552137	0.544932	0.569659	0.564455	0.555452	0.556383	0.532487	0.591635	0.591024	0.638047	0.653338	0.691002	0.715703	0.745516	0.783667	0.801089	0.784391	0.802602	0.800825	0.804677	0.827203	0.828557	0.879733	0.873162
3.14517	3.49793	3.10237	3.11248	3.43927	3.06658	3.26702	2.802	2.78919	3.10311	3.14752	3.31026	3.34755	3.5666	3.31	3.34668	3.2174	3.09044	3.55777	3.50498	3.36334	3.35062	3.38953	3.56628	3.30987	3.36253	3.44833	3.80582	3.85729	3.9808	3.75435	4.1329	4.22047	4.57487	4.47107	4.5934	4.89472	5.04465	5.22321	4.5371	4.84006	4.98806	4.93451	5.15075	4.8143	4.88999	4.89772	4.72561	4.87479	4.6854
1.99237	1.95037	1.98502	1.8419	1.9368	1.97257	1.94023	1.80563	1.67849	1.81364	1.58645	1.39637	1.14499	1.03867	1.03913	0.99424	0.935765	0.951337	0.777358	0.886495	1.03128	1.09587	1.04465	1.06046	1.08859	1.03391	1.07727	1.097	1.0529	1.09162	0.955369	0.861019	0.82498	0.791837	0.742741	0.867334	0.75284	0.81426	0.886593	0.776316	0.690438	0.793032	0.668283	0.702299	0.700985	0.77124	0.696728	0.659275	0.732808	0.699186
0.814781	0.819549	0.841593	0.837479	0.857928	0.847221	0.841602	0.852457	0.842394	0.845023	0.825648	0.841509	0.82893	0.813705	0.811063	0.79315	0.812478	0.79748	0.803606	0.799881	0.787244	0.786244	0.801752	0.77104	0.796142	0.794468	0.789343	0.776733	0.782322	0.774422	0.824651	0.852668	0.86242	0.888458	0.879213	0.898053	0.97429	0.97713	1.01039	1.02564	1.03538	1.02902	1.03657	1.04096	1.02602	1.03085	1.00872	1.0057	0.977396	1.016
1.63199	1.68539	1.56353	1.65246	1.75211	1.57034	1.30236	1.52273	1.53277	1.67527	1.51784	1.32054	1.16862	1.04806	0.95004	0.896625	0.98374	0.93954	0.89914	0.862071	0.961673	0.814286	0.953874	0.85853	0.937474	0.969231	0.860893	0.972751	0.979494	0.992567	0.981151	1.02544	1.06023	0.991926	1.16848	1.15311	1.24335	1.2867	1.22014	1.42558	1.43272	1.38063	1.3322	1.54197	1.45641	1.80991	1.57071	1.81601	1.54631	1.83074
1.0849	1.09458	1.12567	1.12517	1.13879	1.12572	1.13492	1.10853	1.09627	1.12389	1.13098	1.14766	1.12733	1.11891	1.12047	1.14747	1.16994	1.21242	1.19131	1.15944	1.16273	1.20168	1.18278	1.18003	1.19186	1.19947	1.18958	1.20358	1.19423	1.24238	1.22645	1.31922	1.34987	1.40925	1.43283	1.47038	1.46972	1.51699	1.55647	1.6439	1.73345	1.71034	1.72533	1.6924	1.73006	1.75049	1.74711	1.73682	1.71944	1.67187
0.567335	0.570567	0.558113	0.561236	0.554454	0.559119	0.560754	0.546474	0.548903	0.536292	0.544371	0.566539	0.553346	0.547844	0.547134	0.538653	0.528899	0.543469	0.535298	0.54154	0.554012	0.553015	0.54325	0.554598	0.504622	0.511261	0.546737	0.575944	0.56084	0.546673	0.573322	0.565988	0.595704	0.578864	0.578792	0.580417	0.588871	0.595474	0.591446	0.613789	0.608762	0.61961	0.647573	0.627698	0.64213	0.62795	0.618511	0.628867	0.659553	0.573575
	1.56172	1.40806	1.28192	1.60437	2.14356	3.2286	2.92779	2.96223	2.74023	2.54918	2.38303	2.75525	3.26526	3.39791	2.92277	2.79098	2.67057	3.34405	3.44783	3.55827	3.67601	3.43165	3.66292	2.96223	2.90786	2.85546	2.80492	2.75613	2.69616	3.25364	3.08304	3.49786	3.2616	3.23202	3.5264	3.40305	3.04479	3.39144	3.19265	2.69995	2.8471	3.05813	3.03785	2.8244	3.40653	2.82831	2.7946	3.19489	3.48783
0.883721	0.880793	0.887734	0.893915	0.886712	0.898289	0.859752	0.873959	0.884916	0.885398	0.854879	0.865685	0.861086	0.88258	0.892362	0.867524	0.880284	0.886187	0.875499	0.860399	0.868777	0.860407	0.879344	0.875057	0.882468	0.847376	0.880432	0.902469	0.897803	0.883712	0.894984	0.90871	0.918894	0.940165	0.958789	0.986156	1.05643	1.11716	1.13786	1.20773	1.23382	1.25486	1.31936	1.30843	1.2905	1.32094	1.34829	1.36359	1.36005	1.37666
0.713918	0.737553	0.687125	0.714045	0.692444	0.692385	0.712694	0.732942	0.727469	0.698167	0.710586	0.743324	0.727968	0.706958	0.677184	0.695181	0.72384	0.672796	0.682912	0.670115	0.679882	0.671351	0.684116	0.672716	0.640728	0.675433	0.678875	0.640287	0.635849	0.644986	0.614621	0.655051	0.640178	0.628059	0.637387	0.624678	0.690442	0.681781	0.672717	0.655586	0.674024	0.685048	0.676526	0.686392	0.687625	0.672774	0.717454	0.713826	0.68902	0.677205
0.656195	0.651392	0.609939	0.655943	0.659872	0.68071	0.678521	0.66206	0.676323	0.683741	0.669578	0.664129	0.661627	0.652806	0.67228	0.64574	0.636467	0.641586	0.621951	0.623159	0.612909	0.627624	0.610158	0.619782	0.608396	0.594105	0.604077	0.611727	0.599977	0.59768	0.589661	0.615753	0.62071	0.614217	0.629159	0.650579	0.68439	0.700339	0.701416	0.713193	0.724476	0.713244	0.715941	0.712358	0.717862	0.716739	0.729731	0.733323	0.734994	0.721339
1.25928	1.26123	1.24057	1.28154	1.2584	1.29764	1.28384	1.26867	1.27005	1.20192	1.22041	1.22583	1.24843	1.30198	1.22791	1.26401	1.3437	1.27692	1.28111	1.27144	1.25731	1.28101	1.28276	1.25514	1.23737	1.22583	1.24797	1.3272	1.31861	1.31299	1.35837	1.31645	1.35014	1.44377	1.41121	1.39582	1.4761	1.51978	1.52465	1.52641	1.55128	1.45468	1.40034	1.35146	1.40324	1.44296	1.48035	1.4701	1.54445	1.57179
0.85696	0.865289	0.842256	0.815468	0.783041	0.784086	0.796591	0.83655	0.816753	0.850809	0.837007	0.823174	0.899749	0.887008	0.91783	0.908949	0.94847	0.906406	0.88407	0.910139	0.929175	0.91424	0.908515	0.890077	0.878523	0.907228	0.906732	0.969421	0.971623	0.970223	0.969449	1.01698	1.01894	1.05731	1.06574	1.13951	1.22264	1.30316	1.36396	1.28563	1.26329	1.24757	1.22226	1.22616	1.15866	1.17673	1.24831	1.28948	1.26789	1.2909
0.523199	0.535566	0.542956	0.527167	0.543286	0.557997	0.553451	0.552611	0.543225	0.542477	0.542831	0.53233	0.538632	0.531427	0.521216	0.539591	0.528025	0.527964	0.540169	0.529754	0.570344	0.546979	0.544005	0.541063	0.524149	0.521677	0.524584	0.526733	0.514117	0.531337	0.528072	0.527783	0.521031	0.538054	0.556228	0.591502	0.635124	0.666082	0.711945	0.698195	0.739356	0.712671	0.717166	0.72355	0.748361	0.744274	0.78152	0.773581	0.788138	0.82647
1.0372	1.03914	1.0189	1.04167	1.03331	1.02574	0.997162	0.988187	0.985202	0.962552	0.95783	0.960553	0.951395	0.953972	0.950779	0.948295	0.941669	0.935135	0.929729	0.915495	0.890605	0.895063	0.895997	0.900339	0.90411	0.888505	0.890511	0.878797	0.877239	0.871704	0.859269	0.896122	0.926505	0.901435	0.970877	0.993466	1.03338	1.10021	1.1099	1.12071	1.1532	1.16239	1.15639	1.17691	1.16222	1.19777	1.16012	1.14795	1.15653	1.14111
0.611908	0.604807	0.572252	0.590752	0.606289	0.556228	0.605523	0.587433	0.604969	0.594354	0.604083	0.621137	0.60712	0.584615	0.620902	0.629834	0.64388	0.63261	0.644523	0.679952	0.664273	0.590515	0.668293	0.665245	0.648097	0.657685	0.664258	0.666224	0.599393	0.61772	0.665094	0.664389	0.641023	0.71551	0.745634	0.763966	0.820145	0.849898	0.891273	0.928502	0.980384	0.935971	0.932699	0.870055	1.01049	1.00042	0.879514	0.891439	0.88978	1.04428
0.658363	0.656719	0.654371	0.644264	0.634466	0.661597	0.647578	0.625455	0.678469	0.64283	0.644648	0.646476	0.604179	0.617617	0.631666	0.646369	0.669322	0.62603	0.57581	0.56712	0.558688	0.587242	0.618873	0.57766	0.541594	0.559674	0.558618	0.536056	0.543915	0.542138	0.540372	0.575958	0.563893	0.54747	0.581865	0.612325	0.636837	0.671064	0.644488	0.641738	0.69428	0.698007	0.695683	0.702499	0.723163	0.676488	0.673796	0.685632	0.679229	0.664202
0.900724	0.921552	0.89465	0.906822	0.896101	0.910921	0.900656	0.907203	0.905478	0.897917	0.895296	0.887211	0.902093	0.886945	0.879462	0.895851	0.903371	0.906423	0.902913	0.890237	0.899769	0.898689	0.886021	0.875195	0.876984	0.879022	0.873095	0.856168	0.849907	0.869848	0.869506	0.898218	0.903569	0.925633	0.934349	0.993068	1.03294	1.04778	1.08024	1.0549	1.05796	1.03843	1.02094	1.02514	0.989448	1.0057	1.01871	1.04152	1.0418	1.04503
0.773141	0.772654	0.818677	0.789038	0.769352	0.762543	0.749736	0.774442	0.774318	0.791318	0.760345	0.730352	0.75893	0.715975	0.777028	0.744718	0.775601	0.749663	0.756784	0.760429	0.768827	0.758139	0.800653	0.791727	0.793496	0.793882	0.830097	0.819816	0.829852	0.840886	0.849352	0.786547	0.829504	0.871014	0.886696	0.89279	0.925696	0.92167	0.95674	0.946581	0.966172	0.934125	0.946183	0.94565	0.994995	0.948256	0.906465	0.970022	0.980647	0.956838
																																		0.501216	0.530976	0.559087	0.603414	0.635209	0.69016	0.734806	0.817223	0.787824	0.791262	0.796357	0.812602	0.832752	0.782249	0.848184	0.845261
0.84492	0.850241	0.829408	0.833804	0.843351	0.814544	0.824279	0.829237	0.823172	0.826649	0.844953	0.857321	0.85359	0.85352	0.846807	0.860197	0.850087	0.840909	0.851146	0.864283	0.875065	0.853958	0.843732	0.868535	0.851458	0.819211	0.846898	0.846172	0.841725	0.831643	0.844736	0.880703	0.882101	0.891255	0.962903	1.02443	1.08511	1.1186	1.17393	1.22115	1.21993	1.2432	1.19033	1.21011	1.18109	1.16654	1.11334	1.14244	1.15047	1.12875
0.634161	0.609088	0.609144	0.617514	0.605848	0.599923	0.61671	0.622927	0.597785	0.600686	0.588319	0.598795	0.592416	0.596386	0.613308	0.623064	0.596049	0.598157	0.583279	0.616975	0.605075	0.620651	0.59929	0.600237	0.614629	0.596419	0.616369	0.597756	0.608343	0.628804	0.594736	0.683411	0.803164	0.773076	0.773512	0.743682	0.718593	0.727156	0.766025	0.762022	0.740774	0.74278	0.77831	0.739489	0.744068	0.785563	0.773931	0.734392	0.760374	0.727198
0.559019	0.581961	0.563675	0.557862	0.575485	0.56697	0.562104	0.554172	0.556085	0.531935	0.55187	0.538764	0.529002	0.53377	0.545343	0.540921	0.530417	0.564308	0.561647	0.557761	0.545631	0.581381	0.558251	0.570217	0.572746	0.574513	0.590701	0.568421	0.557332	0.547256	0.520337	0.578659	0.609603	0.591526	0.625396	0.628946	0.654423	0.645007	0.633568	0.625178	0.623942	0.60149	0.612387	0.618976	0.637419	0.603896	0.634496	0.64317	0.652083	0.661247
0.511619	0.53784	0.537184	0.542447	0.523152	0.515377	0.513229	0.509846	0.521571	0.502813	0.503409	0.504005	0.504603	0.505203	0.505804	0.506406	0.50701	0.507615	0.508221	0.50883	0.509439	0.51005	0.510663	0.511277	0.511892	0.512509	0.513127	0.513747	0.514369	0.514991	0.515616	0.516242	0.513528	0.517105	0.546723	0.576121	0.608861	0.655844	0.709414	0.757313	0.798956	0.819143	0.831834	0.844766	0.838269	0.842493	0.86523	0.863651	0.904593	0.92988
0.766347	0.721787	0.721235	0.721223	0.707315	0.720913	0.724608	0.740469	0.754125	0.72261	0.76826	0.761494	0.765266	0.775866	0.782649	0.769785	0.768496	0.767239	0.777097	0.783561	0.788002	0.79218	0.80498	0.814988	0.812749	0.815752	0.819649	0.823682	0.821882	0.799699	0.833658	0.8479	0.849256	0.874542	0.904698	0.943236	0.970381	1.00137	1.03494	1.04384	1.03824	1.02531	1.03059	1.01641	1.0152	1.01887	0.978824	0.998569	0.980549	0.978792
0.689487	0.670304	0.704958	0.620989	0.68078	0.637166	0.688944	0.681452	0.668351	0.655745	0.663569	0.6953	0.650236	0.687832	0.740971	0.704576	0.671589	0.641553	0.614088	0.588879	0.637992	0.6675	0.647516	0.693875	0.683925	0.659823	0.674176	0.712019	0.710032	0.733084	0.726891	0.744954	0.784804	0.758958	0.779036	0.816428	0.797888	0.839615	0.867254	0.88628	0.851333	0.825252	0.84602	0.884301	0.808522	0.799833	0.810621	0.804475	0.864531	0.810933
0.738412	0.714627	0.769955	0.781504	0.761449	0.735191	0.749718	0.741107	0.731974	0.735103	0.713771	0.725658	0.712827	0.734958	0.727629	0.728887	0.724582	0.734482	0.731022	0.730732	0.714364	0.695856	0.700817	0.697338	0.696581	0.730697	0.70686	0.691404	0.739247	0.72595	0.722724	0.694259	0.678568	0.738559	0.759248	0.863357	0.954614	0.961263	0.986096	0.969864	0.927884	0.899495	0.901175	0.886171	0.948535	0.871068	0.836961	0.83369	0.841815	0.813104
0.79367	0.80254	0.821625	0.818121	0.805209	0.814478	0.820679	0.82996	0.776506	0.777148	0.802722	0.821624	0.837526	0.820288	0.812245	0.819768	0.837988	0.832089	0.826526	0.843737	0.835566	0.836479	0.825789	0.826549	0.835172	0.833492	0.84458	0.839581	0.818782	0.808377	0.815375	0.837253	0.82537	0.852592	0.879026	0.912499	1.02425	1.04106	1.10918	1.14967	1.19564	1.2175	1.22157	1.26381	1.23403	1.23302	1.22139	1.30541	1.27101	1.26209
																								1.50064	1.49489	1.5322	1.50998	1.49043	1.47138	1.37701	1.4785	1.46986	1.53587	1.57516	1.69135	1.72956	1.84539	2.07264	2.12358	2.16203	2.27391	2.39348	2.42687	2.48682	2.54287	2.41079	2.406	2.41512	2.58631
1.80176	1.61645	1.66366	1.49383	1.60401	1.73537	1.64278	1.88153	1.85448	1.8677	1.68493	1.75608	1.7516	1.82314	1.5795	1.32436	1.68879	1.52078	1.38318	1.45376	1.47814	1.37308	1.49386	1.63793	1.60471	1.63731	1.43518	1.44748	1.54242	1.47386	1.69241	1.51773	1.47597	1.49537	1.56322	1.73427	1.66134	1.79635	1.87504	1.97721	1.99512	2.15905	2.05524	2.09942	2.50672	1.88147	2.0441	1.89783	2.13637	2.2047
0.765772	0.766141	0.805629	0.889606	0.870423	0.830572	0.962415	0.919252	1.03147	1.0188	0.852293	0.994707	0.873053	0.777913	0.854052	0.774981	0.709311	0.6539	0.699166	0.751164	0.811519	0.742947	0.68506	0.638924	0.598611	0.563083	0.531535	0.583562	0.629702	0.74656	0.824493	0.834143	0.844022	0.857769	0.788961	0.792895	0.796869	0.832348	0.856564	0.974858	1.04715	1.00587	0.920129	0.923899	1.07044	0.980874	1.08548	0.967778	0.912617	0.863406
0.573824	0.573574	0.567159	0.563955	0.578419	0.562133	0.545758	0.561866	0.561062	0.5862	0.572635	0.57406	0.569088	0.566731	0.580459	0.590732	0.592305	0.596835	0.598983	0.565085	0.579057	0.585279	0.571174	0.575391	0.573875	0.557402	0.555756	0.556861	0.538032	0.551157	0.552822	0.576341	0.587455	0.576619	0.612602	0.628508	0.628516	0.667668	0.68577	0.695615	0.716112	0.717469	0.717804	0.718123	0.748012	0.742733	0.76045	0.789018	0.812615	0.821038
5.03796	4.85268	5.18495	5.69528	5.29019	5.10816	5.36262	5.20141	4.83993	5.10969	4.50237	4.73708	4.87326	5.09427	8.61428	8.47657	5.16122	8.29966	8.36267	8.42665	6.96517	5.93571	6.63051	5.77177	6.84066	6.79782	7.29514	7.24451	6.79165	7.35295	7.46659	7.29055	7.44953	7.92537	7.79449	8.2891	9.63981	9.51799	9.68043	9.26984	10.1564	10.0488	10.0493	10.9003	10.8154	10.6057	10.3965	11.5006	10.0383	10.785
1.66883	1.65442	1.60351	1.55861	1.56791	1.5404	1.55728	1.54996	1.47688	1.47445	1.40334	1.42136	1.41816	1.39525	1.39884	1.37112	1.39648	1.37308	1.34386	1.38479	1.31789	1.34919	1.35987	1.39149	1.34977	1.40079	1.38901	1.33131	1.3112	1.38201	1.29909	1.40168	1.37348	1.39055	1.45771	1.46061	1.50522	1.44769	1.55583	1.46534	1.48629	1.50431	1.48663	1.49663	1.59957	1.61673	1.73304	1.77945	1.74832	1.69356
1.21515	1.19296	1.1417	1.26455	1.25074	1.1583	1.1797	1.19588	1.17182	1.1454	1.1048	1.10877	1.13477	1.14908	1.1386	1.15023	1.1637	1.12446	1.08778	1.14522	1.08941	1.08426	1.13524	1.13507	1.11728	1.10003	1.08331	1.09659	1.12399	1.09462	1.08066	1.16184	1.14579	1.20479	1.26322	1.30218	1.27484	1.35433	1.4444	1.38855	1.41901	1.50375	1.47698	1.45115	1.45209	1.37072	1.35177	1.32712	1.30875	1.32388
3.97076	3.73463	3.91457	3.40855	3.90543	4.10812	3.95259	4.21556	3.46548	3.3561	4.06239	3.71578	3.2627	3.39769	3.34362	4.29261	3.37316	3.5797	3.5686	3.39462	3.18932	3.42456	3.26046	3.10016	3.24641	3.03731	2.62501	2.30884	3.55981	3.39186	3.37118	2.75326	2.74866	2.79722	3.35732	2.69863	2.74566	2.33463	2.32454	2.39875	2.54421	2.67288	2.94998	3.11279	3.30589	4.25029	4.4637	4.40054	5.48267	5.07645
0.866435	0.955183	0.888466	0.953915	1.02977	0.978241	0.940896	1.14579	1.1308	1.17706	1.10192	1.02048	0.900638	0.961058	1.03017	0.978037	0.888346	0.813724	0.864139	0.889515	0.89946	0.874324	0.789412	0.887844	0.799865	0.726167	0.943374	1.34598	1.1059	0.920349	0.788119	0.689111	0.687092	0.685085	0.683089	0.787676	0.828812	0.836955	0.84526	1.00391	0.96992	0.938155	0.908405	1.03505	1.20274	1.43526	1.77924	1.77327	1.76735	1.76146
0.689532	0.701281	0.679523	0.660311	0.633095	0.645641	0.670448	0.649594	0.627759	0.633043	0.625104	0.630948	0.611167	0.610889	0.604739	0.588364	0.577065	0.574292	0.582866	0.60364	0.597834	0.584591	0.571719	0.586764	0.569687	0.59788	0.58349	0.583362	0.580153	0.578449	0.595272	0.658158	0.674893	0.678246	0.645297	0.65484	0.670754	0.667788	0.688011	0.705379	0.709851	0.732751	0.723655	0.691842	0.749456	0.753452	0.740206	0.764513	0.793707	0.802947
0.655342	0.731412	0.706918	0.669926	0.655081	0.596761	0.63246	0.62669	0.612756	0.63299	0.654606	0.68189	0.660957	0.683791	0.684934	0.734272	0.727146	0.704254	0.75526	0.75284	0.734643	0.718988	0.707249	0.742637	0.709183	0.701654	0.733262	0.711262	0.728633	0.74598	0.709615	0.754222	0.747691	0.745247	0.746949	0.711969	0.747617	0.728861	0.823809	0.907938	0.897885	0.951624	0.955486	0.973728	1.03151	0.989902	0.980853	0.943749	0.977411	0.947087
0.788821	0.848519	0.791474	0.837879	0.807929	0.77587	0.765232	0.785776	0.824541	0.867329	0.77868	0.706472	0.715267	0.724284	0.788839	0.712569	0.711409	0.701012	0.688774	0.671199	0.646724	0.63333	0.63811	0.642962	0.663682	0.71086	0.664535	0.711069	0.679341	0.663855	0.659991	0.730181	0.675092	0.728536	0.72413	0.719776	0.719529	0.818129	0.948045	0.826454	0.833545	1.04711	1.05225	1.05745	0.903992	0.789431	0.841878	0.901791	0.970884	1.05144
0.945646	0.965238	0.931226	0.939808	0.957791	0.92707	0.922706	0.920794	0.935915	0.923933	0.932767	0.935124	0.996397	0.962668	0.890163	0.932083	0.946647	0.933737	0.921037	0.910468	0.929523	0.924412	0.9155	0.885338	0.914354	0.907108	0.890727	0.874829	0.851783	0.860916	0.869302	0.868578	0.856596	0.901307	0.93082	0.966956	1.04132	1.10324	1.10605	1.14398	1.15992	1.18282	1.14623	1.17486	1.14475	1.1935	1.23351	1.23546	1.2768	1.2622
1.18385	1.19192	1.18439	1.2203	1.21352	1.1992	1.20967	1.1614	1.18582	1.19917	1.17839	1.19421	1.14384	1.16779	1.12509	1.09313	1.12954	1.16869	1.09631	1.21622	1.19941	1.31424	1.1982	1.22305	1.21311	1.2422	1.15699	1.13877	1.10764	1.12858	1.17687	1.20994	1.22582	1.1905	1.27245	1.32925	1.36247	1.51153	1.44078	1.47324	1.44331	1.43019	1.49628	1.47421	1.43136	1.36704	1.46617	1.42096	1.41538	1.59543
0.681097	0.706525	0.705156	0.721475	0.721764	0.726679	0.726104	0.723734	0.719708	0.71672	0.725502	0.738696	0.731463	0.718756	0.706482	0.694621	0.699908	0.697961	0.682788	0.712358	0.702243	0.695681	0.663892	0.716878	0.727683	0.713018	0.711371	0.734017	0.73294	0.729709	0.764917	0.792379	0.799455	0.8165	0.842788	0.854586	0.909361	0.952081	0.993013	0.995424	1.01298	0.985887	0.98704	0.993805	0.982739	0.959736	0.965179	0.949912	0.929583	0.910106
0.801394	0.805432	0.769059	0.820157	0.810942	0.810812	0.830856	0.842368	0.858096	0.851211	0.830134	0.851608	0.846856	0.840324	0.836293	0.855211	0.854373	0.867749	0.856098	0.857014	0.870337	0.866382	0.847466	0.821499	0.800101	0.807553	0.814124	0.807691	0.800317	0.804994	0.813664	0.817476	0.80815	0.831805	0.830855	0.842713	0.904934	0.93484	0.937484	0.942399	1.00147	0.993949	0.98497	0.959323	0.972162	0.969576	1.00059	0.969115	1.00139	1.00771
	1.18086	1.54951	2.2528	4.1251	4.05499	4.06122	3.96433	4.24436	3.83491	3.77364	4.18896	4.30549	2.48621	2.73865	3.04814	3.4365	3.93826	3.8913	3.84544	3.80065	3.75689	3.71412	4.0658	4.17638	4.29314	4.41662	4.54742	4.68619	4.83371	4.99081	5.15847	5.18897	5.06328	4.77139	5.23111	5.49711	5.88212	5.83376	5.7862	5.6921	5.56282	6.33919	5.92222	6.22746	6.27325	6.27508	6.27692	6.72035	6.36205
0.503262	0.533377	0.51198	0.530183	0.506127	0.500736	0.505123	0.509587	0.513447	0.517366	0.521344	0.525385	0.529489	0.533657	0.537892	0.518431	0.50033	0.515308	0.53121	0.524822	0.518585	0.512495	0.506546	0.512898	0.517937	0.523076	0.514301	0.512817	0.513444	0.514073	0.534699	0.570718	0.578109	0.592289	0.615543	0.610179	0.614935	0.656115	0.659514	0.681075	0.754454	0.707898	0.726414	0.707055	0.788936	0.787529	0.783717	0.793665	0.791537	0.788122
			0.503488	0.504774	0.506068	0.507367	0.509641	0.511886	0.51415	0.521614	0.529298	0.519729	0.534869	0.547587	0.52761	0.547924	0.523437	0.539981	0.533436	0.519154	0.524181	0.539913	0.512266	0.532243	0.516295	0.53127	0.519493	0.522939	0.555488	0.570424	0.558145	0.557215	0.56424	0.583701	0.5987	0.641968	0.660564	0.706242	0.703782	0.727865	0.737569	0.740195	0.748381	0.765678	0.784025	0.760968	0.766049	0.75942	0.75851
0.65131	0.66219	0.654722	0.651608	0.630624	0.627684	0.613344	0.623095	0.61242	0.611428	0.606129	0.601565	0.607891	0.585823	0.576874	0.58078	0.557724	0.557452	0.572197	0.554647	0.550025	0.553205	0.537216	0.529294	0.530416	0.520018	0.530366	0.522633	0.52312	0.526879	0.522369	0.520095	0.529355	0.517828	0.518346	0.510567	0.524927	0.53581	0.537344	0.595908	0.604162	0.6151	0.61496	0.653518	0.655944	0.625907	0.639922	0.648451	0.656811	0.649417
0.804314	0.763027	0.795795	0.760064	0.754065	0.770126	0.767931	0.775296	0.777633	0.75067	0.781671	0.792969	0.80517	0.796433	0.747983	0.741076	0.689599	0.706033	0.740353	0.742156	0.73431	0.793293	0.781369	0.770197	0.78094	0.752339	0.805527	0.828284	0.816748	0.855233	0.843706	0.912636	0.89487	0.934733	0.950864	0.980317	1.02137	1.04651	1.0588	1.10045	1.09963	1.10796	1.11671	1.11569	1.11828	1.0654	1.10971	1.0431	1.01867	1.05224
0.674817	0.699253	0.684443	0.670248	0.646875	0.654392	0.65367	0.65588	0.658105	0.660345	0.6626	0.664871	0.667158	0.66946	0.737119	0.706228	0.696491	0.691667	0.715704	0.708259	0.700967	0.693824	0.686825	0.675453	0.692403	0.689004	0.703176	0.684234	0.692503	0.679226	0.666449	0.697206	0.73094	0.768105	0.752746	0.741306	0.776873	0.772298	0.780165	0.825495	0.814817	0.866248	0.892078	0.866956	0.88526	0.904353	0.896501	0.896866	0.956689	0.958732
0.679342	0.681983	0.751878	0.712379	0.729476	0.721823	0.660639	0.670529	0.680718	0.719254	0.708208	0.731614	0.760557	0.685399	0.70449	0.716528	0.731862	0.744191	0.739154	0.743026	0.74394	0.737671	0.753629	0.711489	0.72964	0.721856	0.73515	0.735132	0.745075	0.712438	0.719027	0.72574	0.745109	0.762859	0.781475	0.801023	0.821573	0.905642	0.891033	0.938725	0.936116	0.924936	0.911928	0.827795	0.826566	0.884632	0.842462	0.839213	0.91029	0.836236
0.939718	0.974091	0.978075	0.971891	0.947014	0.997292	0.966501	0.954324	0.973121	0.945293	0.943885	0.973163	0.940728	0.947853	0.940832	0.918631	0.974096	0.941259	0.917491	0.887693	0.917533	0.878444	0.924696	0.90161	0.91396	0.898699	0.933731	0.900995	0.920774	0.922558	0.924349	0.934255	0.944376	0.98821	1.03631	1.08933	1.14807	1.17017	1.21652	1.23061	1.24504	1.25649	1.26119	1.26593	1.24727	1.25633	1.26552	1.20664	1.25607	1.17624
0.904054	0.900214	0.893387	0.866535	0.873343	0.861705	0.853138	0.865825	0.845815	0.900495	0.855843	0.855378	0.863358	0.916454	0.97651	0.880419	0.920102	0.961606	0.94924	0.930794	0.860303	0.962425	0.924683	0.889789	0.913294	0.938074	0.92688	0.988364	0.977971	0.969978	0.97637	0.982847	1.00529	1.05367	1.07616	1.10563	1.16732	1.17015	1.2253	1.18644	1.28886	1.22286	1.23459	1.27861	1.30136	1.29089	1.35693	1.3335	1.3559	1.3709
0.639033	0.634575	0.627829	0.634312	0.640358	0.66257	0.648622	0.627204	0.645486	0.657688	0.657124	0.649341	0.641706	0.633663	0.643112	0.653029	0.626191	0.626975	0.640551	0.660154	0.649693	0.666403	0.658514	0.652521	0.640898	0.632606	0.666103	0.638239	0.645493	0.684987	0.687161	0.748451	0.696446	0.718504	0.720248	0.725695	0.766273	0.755387	0.734291	0.770456	0.771375	0.720102	0.752537	0.717539	0.694664	0.711692	0.679346	0.667492	0.616531	0.608744
0.580292	0.577274	0.587085	0.588454	0.599011	0.604856	0.60195	0.596111	0.587912	0.608147	0.627236	0.606715	0.607099	0.590143	0.583676	0.58051	0.573278	0.587836	0.563732	0.561653	0.547516	0.552736	0.575953	0.573756	0.534988	0.535199	0.546494	0.528198	0.564625	0.525727	0.524226	0.521807	0.541625	0.541732	0.588754	0.593829	0.627474	0.661665	0.738958	0.741865	0.743368	0.748092	0.77125	0.785122	0.792169	0.751942	0.765291	0.735889	0.76875	0.757799
0.64238	0.628062	0.64309	0.582218	0.63079	0.625144	0.635107	0.662861	0.61316	0.640572	0.64647	0.666185	0.62406	0.653655	0.650635	0.639955	0.631501	0.607091	0.616547	0.61399	0.610465	0.618903	0.606966	0.613184	0.60801	0.582635	0.56172	0.572959	0.573977	0.566911	0.584122	0.596653	0.672407	0.652041	0.634725	0.6169	0.649227	0.695281	0.718838	0.744419	0.69744	0.628648	0.649967	0.725613	0.689485	0.789129	0.6872	0.770372	0.846003	0.818097
1.91433	2.09183	2.10918	1.90563	1.90064	2.0296	1.7392	1.70866	1.80779	1.90823	1.8162	1.65021	1.44843	1.72121	2.08539	1.8728	1.30907	1.37336	1.52149	1.41938	1.3589	1.38046	1.31527	1.68981	1.30897	1.35947	1.41403	1.47315	1.50676	1.50527	2.35727	2.45632	2.67814	2.01682	1.95787	1.90227	2.2873	2.18195	2.08588	2.19549	2.33085	2.79888	2.35502	2.10727	1.53752	1.5588	1.66609	1.78924	2.22749	2.18707
1.49889	1.60293	1.61581	1.63558	1.59008	1.56225	1.60779	1.55497	1.60294	1.58067	1.496	1.6254	1.56725	1.61072	1.64303	1.50428	1.59539	1.57557	1.5188	1.39778	1.46027	1.38128	1.34213	1.26681	1.25915	1.24424	1.31562	1.24773	1.2877	1.26625	1.21772	1.33842	1.34382	1.41273	1.4783	1.52711	1.61605	1.70915	1.73512	1.83817	1.89314	1.84136	1.86602	1.86147	1.83181	1.8096	1.87536	1.85468	1.84303	1.80106
0.707242	0.747179	0.743142	0.848606	0.715257	0.688882	0.685775	0.678456	0.716106	0.752466	0.776596	0.718373	0.666212	0.766163	0.692549	0.753237	0.736738	0.829245	0.838634	0.756533	0.779842	0.825499	0.742234	0.733843	0.813239	0.81539	0.79461	0.781651	0.783482	0.832293	0.903911	0.872641	0.977216	0.890369	1.0317	1.02363	0.977408	0.994474	1.05079	1.08743	1.07199	1.022	0.918346	0.899487	0.916091	0.938388	0.941143	0.926996	0.949324	1.00461
1.3199	1.31423	1.30721	1.33224	1.27958	1.27685	1.24904	1.27041	1.24552	1.2434	1.24128	1.21645	1.18271	1.1508	1.14426	1.15341	1.12779	1.0697	1.10973	1.08894	1.04171	1.06731	1.04859	1.06041	1.0591	1.05363	1.03162	1.02927	1.04371	1.02438	1.01275	1.04229	1.04731	1.10316	1.10969	1.13318	1.19177	1.24721	1.28607	1.3357	1.34882	1.3619	1.33323	1.30649	1.29932	1.28454	1.35364	1.3694	1.38553	1.32421
0.814195	0.868031	0.819384	0.88177	0.850369	0.855865	0.886093	0.861582	0.877002	0.905356	0.904944	0.873829	0.892547	0.912086	0.918672	0.939223	0.960715	0.870648	0.85693	0.843638	0.797276	0.845873	0.847508	0.873557	0.835416	0.747866	0.851612	0.778487	0.746777	0.831925	0.902069	0.905965	0.847816	0.889153	0.875214	0.927955	1.01855	1.06583	0.989158	0.975429	1.01069	1.06763	1.0744	1.04901	1.04313	1.01341	1.005	0.980435	0.969237	0.961707
0.655618	0.677089	0.691739	0.668667	0.681922	0.661225	0.674254	0.648597	0.657059	0.676928	0.645572	0.655883	0.645402	0.648768	0.639447	0.638129	0.637068	0.616335	0.623584	0.612777	0.615881	0.617995	0.599847	0.611078	0.607286	0.591027	0.579712	0.596002	0.58926	0.610787	0.610834	0.637536	0.636836	0.649081	0.662545	0.687633	0.722122	0.73906	0.821724	0.838973	0.854163	0.850467	0.841669	0.865413	0.846994	0.85935	0.842804	0.864419	0.881588	0.824436
0.689312	0.717657	0.696699	0.690687	0.690316	0.685118	0.671051	0.683127	0.631156	0.679584	0.671511	0.699046	0.690808	0.6828	0.684505	0.7054	0.712637	0.680602	0.690205	0.715281	0.706936	0.692459	0.696101	0.700601	0.683463	0.687298	0.689642	0.685838	0.686644	0.690745	0.685843	0.697739	0.700196	0.725463	0.753959	0.840132	0.895638	0.931129	0.969975	0.993302	0.964525	0.948027	0.950535	0.932958	0.919344	0.89603	0.903235	0.896926	0.916925	0.932349
0.564515	0.553245	0.577041	0.590011	0.597792	0.588289	0.588962	0.585693	0.591318	0.590112	0.58639	0.594822	0.6035	0.625681	0.606047	0.593576	0.608373	0.597428	0.605834	0.611321	0.594719	0.584432	0.604778	0.612431	0.608661	0.575219	0.57349	0.590851	0.575388	0.560714	0.542816	0.609817	0.608313	0.620266	0.618374	0.621184	0.629133	0.659205	0.692025	0.71884	0.742074	0.788565	0.810525	0.835184	0.856344	0.869966	0.864506	0.860131	0.854078	0.848109
0.501266	0.503773	0.506305	0.508863	0.511156	0.51347	0.50885	0.507014	0.505191	0.503381	0.515594	0.51423	0.522136	0.529799	0.517939	0.533291	0.538844	0.535175	0.524544	0.526979	0.503739	0.522529	0.542775	0.554323	0.513482	0.543019	0.56394	0.551616	0.561402	0.585287	0.584653	0.617964	0.59395	0.607809	0.639427	0.665076	0.694527	0.789674	0.776266	0.786495	0.808738	0.880615	0.882277	0.909776	0.895154	0.995851	0.976528	0.997563	0.983918	0.972836
0.918348	0.88561	0.867182	0.853427	0.885864	0.864537	0.870495	0.876535	0.928029	0.889374	0.894542	0.884697	0.854428	0.859686	0.846643	0.834267	0.843495	0.85293	0.862578	0.87592	0.845532	0.896618	0.905519	0.914599	0.88268	0.834071	0.874163	0.884031	0.88234	0.876491	0.842554	0.877255	0.848663	0.956652	1.03557	1.08502	1.02737	0.975534	1.02697	1.32071	1.32249	1.35252	1.32084	1.27354	1.26143	1.29617	1.32587	1.2948	1.26515	1.30012
0.701158	0.698169	0.685713	0.698583	0.668897	0.693182	0.679143	0.693402	0.711091	0.699386	0.721279	0.729784	0.723731	0.709009	0.717159	0.723599	0.710721	0.722646	0.697517	0.701307	0.682419	0.691932	0.709315	0.73249	0.722323	0.700929	0.709671	0.724542	0.698783	0.693447	0.696845	0.773995	0.716253	0.708575	0.749212	0.73372	0.761028	0.777573	0.808252	0.830976	0.853546	0.84341	0.851207	0.851266	0.826618	0.845796	0.874249	0.855956	0.909305	0.904593
		0.502266	0.503667	0.505077	0.506494	0.507919	0.509352	0.510793	0.512242	0.5137	0.515166	0.51664	0.518123	0.519614	0.521114	0.522623	0.52414	0.525666	0.527201	0.528745	0.530299	0.531861	0.533433	0.527333	0.526949	0.520323	0.516652	0.516282	0.518213	0.50253	0.501895	0.50189	0.501885	0.515604	0.560421	0.592528	0.609757	0.628018	0.647406	0.66803	0.673291	0.687095	0.672121	0.667772	0.688652	0.710417	0.737474	0.759061	0.78853
0.923516	0.926262	0.917337	0.899216	0.894772	0.873881	0.845206	0.962295	1.00576	0.835376	0.875379	0.912793	0.993769	0.879667	0.918135	0.940382	0.898558	0.866488	0.826373	0.834858	0.852795	0.843077	0.86085	0.847459	0.855163	0.818079	0.841667	0.833166	0.969035	0.864472	0.867459	0.887026	0.976432	0.930913	0.914873	0.944456	0.973679	0.973042	0.973441	1.14998	0.979427	0.958851	1.08575	1.07375	0.919404	0.920051	1.08882	1.3334	1.43733	1.47058
																0.514865	0.512888	0.510926	0.508978	0.507046	0.505128	0.505465	0.505803	0.506142	0.506481	0.50682	0.50716	0.503435	0.504521	0.505611	0.506706	0.507805	0.50207	0.530055	0.535779	0.565998	0.579608	0.647702	0.675696	0.706219	0.682436	0.676948	0.755432	0.718717	0.691371	0.688495	0.713603	0.722739	0.732113
3.0258	3.09156	3.23028	3.56124	3.21521	3.30874	3.53598	3.69786	3.77254	3.6658	3.91002	3.79309	3.5436	3.95335	3.80398	3.66854	3.83806	3.66797	3.51048	3.63294	3.62794	3.91028	4.01438	4.20775	4.13461	4.40088	4.30855	4.23701	4.34272	4.39103	4.18398	4.64631	4.49744	4.54709	4.86518	5.01593	4.37542	3.55802	2.02863	1.41877	1.28851	1.18015	1.08861	1.01739	0.954921	0.899677	0.841801	0.79092	0.74584	0.705621
0.544814	0.538818	0.532953	0.540966	0.549469	0.55991	0.570754	0.552005	0.54635	0.554599	0.556102	0.557613	0.559131	0.560659	0.562194	0.56378	0.565374	0.566977	0.554909	0.562119	0.559619	0.557142	0.554687	0.552253	0.556853	0.56153	0.566287	0.571125	0.565339	0.55967	0.554112	0.548665	0.543323	0.590168	0.645852	0.68548	0.683032	0.680601	0.698416	0.733397	0.761904	0.778243	0.799446	0.789812	0.795008	0.807666	0.814366	0.858909	0.871352	0.868761
3.49681	4.02647	3.94574	3.97295	3.85627	3.99316	4.28065	4.34596	3.89224	4.12449	4.38622	3.71217	4.08584	3.64739	2.99203	3.40562	3.54838	2.50812	1.9081	2.85278	2.63057	2.28653	2.74553	2.96714	2.24034	2.72447	2.15297	2.38221	1.78832	1.96599	1.95174	1.93889	2.28312	2.04643	2.97243	2.00834	1.77923	2.16986	2.20606	2.02169	2.29806	1.88703	1.97493	2.16334	2.39775	2.29467	2.57409	2.55589	2.62365	2.67332
0.541673	0.538072	0.534518	0.53101	0.527549	0.512153	0.566781	0.634454	0.608332	0.683461	0.597601	0.627469	0.66168	0.673982	0.646307	0.663737	0.67884	0.728753	0.676514	0.799133	0.774925	0.842752	0.793569	0.838749	0.810684	0.784917	0.714988	0.814907	0.700491	0.821456	0.775729	0.881707	0.824327	0.825104	0.750809	0.77719	0.742688	0.711118	0.682124	0.630737	0.63592	0.587758	0.533728	0.554947	0.577922	0.602883	0.630096	0.605999	0.645021	0.682305
0.90676	0.898415	0.876281	0.896971	0.916626	0.934509	0.933383	0.951476	0.900282	0.946601	0.930692	0.825941	0.813538	0.897993	0.835575	0.914756	0.823912	0.929366	0.98843	0.884243	0.9453	0.984709	0.973414	0.929118	1.01126	1.05848	1.05215	0.982646	0.995068	0.987782	0.981777	0.90148	0.941102	0.984366	0.985133	0.98567	0.991093	1.00177	1.07489	0.920489	0.804875	1.01003	1.35554	1.21331	1.24989	1.28874	1.33008	1.37417	1.37596	1.37775
[truncated: 351 more rows]
[truncated: 440 more columns]

## Sheet: TFEB_3xSA_TR Nutrient Addition
TFEB_3xSA_TR; cells cultured with 0xEAA 0xGluc/Glut 0xEGF/Ins , stimulated at time point 32; sampling time: 2 min; data are cells-by-time
Tx dosing: media
[truncated: 1,330 more rows]
[truncated: 440 more columns]

## Sheet: TFEB_TR EI then Inhibitors
TFEB_TR; cells cultured with 1xEAA 1xGluc/Glut , stimulated at time points 17, 37; sampling time: 6 min; data are cells-by-time
[truncated: 897 more rows]
[truncated: 28 more columns]

[truncated: 1 more sheets: TFEB_3xSA_TR EI then Inhibitor]
