# Supplementary material for: Continuous sensing of nutrients and growth factors by the mTORC1-TFEB axis
Source: eLife. 2023 Sep 12;12:e74903. doi: 10.7554/eLife.74903 (PMC10547473; doi:10.7554/eLife.74903)
Supplement: Figure 3—source data 1. [file elife-74903-fig3-data1.xls]

## Sheet: TFEB_TR 1xgg 1xaa
TFEB_TR; cells culture with 1xGluc/Glut 1xEAA, stimulated at time point 38; sampling time: 5 min; data are cells-by-time
Tx dose: 0ng INS
3.92377	3.61869	3.12687	3.50513	3.62704	3.44829	4.04429	4.41249	3.69756	3.9009	4.23681	4.06104	3.90287	3.9189	3.53453	3.4754	3.31127	3.01293	3.08695	3.05616	3.37932	3.35792	3.20339	2.29272	2.68666	3.1426	2.87513	2.19629	2.08334	2.63845	2.54353	2.50861	2.22319	2.61053	2.23967	3.05762	1.7377	2.16294	1.82055	1.69651	1.99945	1.7517	1.54371	1.77145	1.65479	1.60223	1.58497	1.52026	1.3674	1.32327
1.26868	1.23276	1.20874	1.23386	1.2077	1.19736	1.16741	1.17994	1.16413	1.16037	1.17354	1.18088	1.22014	1.19661	1.20034	1.17637	1.19821	1.18295	1.17446	1.18416	1.15858	1.15793	1.14271	1.16087	1.17756	1.17961	1.14354	1.14563	1.16739	1.17185	1.11202	1.10999	1.1058	1.14512	1.14197	1.15498	1.09396	1.13088	1.14952	1.10013	1.14907	1.10976	1.11697	1.13171	1.10392	1.09145	1.1506	1.13633	1.14853	1.15219
1.13841	1.14922	1.07848	1.07346	1.03337	0.974028	0.992214	1.02228	1.01573	1.00915	0.99138	0.975194	1.03536	1.03967	1.06127	1.00411	1.02693	0.972142	0.960974	0.968073	0.955744	0.948406	0.960865	0.920916	0.999831	1.02511	1.04356	1.0873	1.03546	1.10573	1.05813	1.07684	1.1187	1.07814	1.04042	1.10293	1.0904	1.07945	1.08348	1.08753	1.06274	1.08585	1.10998	1.17865	1.20934	1.14666	1.1946	1.1913	1.17875	1.17864
1.78467	1.89083	2.06688	1.93604	2.15951	2.10334	1.9929	1.86527	2.19954	2.21621	2.35051	2.19681	2.26047	2.13767	1.81949	2.00258	1.93253	2.17058	1.94644	2.11978	2.08246	2.28345	2.11213	2.27231	2.14036	2.10444	2.10355	2.0472	1.73861	1.77604	1.80904	1.67859	1.59039	1.59098	1.69476	1.94382	1.46589	1.69246	1.78724	1.94874	2.00225	1.92678	1.93098	2.0216	2.07492	2.08018	1.86011	2.00249	1.93689	1.93316
0.917923	0.928537	0.950701	0.926449	0.885811	0.857719	0.860153	0.885772	0.875615	0.932021	0.806873	0.820754	0.840399	0.775167	0.798816	0.843641	0.801106	0.810321	0.816192	0.812423	0.876632	0.827371	0.807417	0.874654	0.786073	0.82372	0.819144	0.814403	0.818311	0.822408	0.828655	0.829795	0.801361	0.808536	0.804801	0.775341	0.82643	0.828277	0.871512	0.822465	0.808275	0.813363	0.828229	0.827236	0.875049	0.838776	0.854275	0.835686	0.830321	0.890641
1.83355	1.66921	1.64736	1.52836	1.44764	1.35368	1.32378	1.33178	1.28989	1.27662	1.32853	1.2685	1.25634	1.23725	1.32203	1.26005	1.26627	1.26454	1.24147	1.19314	1.10929	1.08353	1.01959	1.03678	1.02149	1.02847	1.01077	1.00898	0.975816	0.967199	0.96373	0.967234	0.962496	1.00915	0.977791	0.981742	0.956093	0.973853	0.984734	0.998356	1.01819	0.975481	0.995715	1.00781	1.01312	1.0123	0.985278	0.978891	0.96476	0.944468
1.65471	1.58163	1.63134	1.67585	1.48021	1.48259	1.47436	1.47839	1.49253	1.45645	1.49698	1.512	1.48488	1.49126	1.50967	1.45798	1.46456	1.4577	1.45946	1.42125	1.53543	1.41609	1.40615	1.43092	1.50771	1.41323	1.50922	1.51076	1.50285	1.42685	1.43785	1.38039	1.35072	1.37508	1.37516	1.3961	1.24111	1.26977	1.29534	1.26717	1.31207	1.2579	1.23849	1.26051	1.20296	1.19143	1.15105	1.09592	1.06212	1.06982
2.67109	2.02503	2.91179	2.85968	2.49444	2.38425	2.33339	2.37173	2.08961	2.29221	2.70335	2.18658	2.30028	1.98399	1.99594	1.85379	1.65203	1.7085	1.99661	1.55372	1.59343	1.72598	1.4866	2.77419	2.54197	2.11268	1.95218	2.45283	2.01302	1.77053	1.76923	1.51036	1.32113	1.0582	1.04691	0.965128	0.999829	0.891997	0.979512	1.62125	3.19426	3.01699	2.91325	3.63647	3.27774	3.15811	2.66739	2.63744	3.19837	3.25868
0.85252	0.825348	0.882742	0.849034	0.862067	0.850633	0.901286	0.865848	0.85601	0.827478	0.880139	0.86106	0.873661	0.891666	0.818417	0.84745	0.926857	0.87863	0.927217	0.907314	0.878195	0.876358	0.872329	0.899133	1.17925	1.67503	1.71214	1.96159	1.81576	2.08479	2.08627	2.12575	2.31243	2.20359	2.10453	4.85842	1.52348	2.04796	2.03563	2.01398	1.87524	1.75439	1.80372	1.80521	1.86984	1.73654	1.72748	1.7352	1.69905	1.82649
2.71709	2.37203	2.35616	2.46183	2.27418	2.18598	2.14691	1.94218	2.18611	2.04045	2.00227	1.99256	1.98447	1.99614	1.92898	1.9865	2.00039	2.08318	2.00558	2.09295	2.29566	2.44056	2.45265	2.22997	2.33279	2.38956	2.00363	2.30726	2.64554	2.80313	3.25474	3.02141	3.45693	3.01096	2.73078	5.17606	1.90591	2.38782	2.31186	2.40779	2.26515	2.1632	2.07003	1.92639	1.83036	1.57423	1.53418	1.59737	1.51916	1.48384
1.29365	1.27239	1.27433	1.26934	1.2678	1.26016	1.25042	1.28897	1.30089	1.22555	1.24997	1.32014	1.28809	1.2324	1.25701	1.29217	1.23328	1.29925	1.27479	1.24179	1.23903	1.25829	1.26747	1.27267	1.3217	1.29516	1.35681	1.35072	1.31204	1.41604	1.3478	1.356	1.39108	1.4089	1.44077	1.47888	1.3388	1.30014	1.36328	1.45383	1.44543	1.48531	1.47781	1.4864	1.53234	1.53304	1.64919	1.49001	1.52652	1.50235
1.58865	1.36291	1.54941	1.48645	1.43779	1.48817	1.50944	1.39248	1.37412	1.38431	1.37146	1.49742	1.52056	1.62648	1.69091	1.76066	1.63414	1.64269	1.63401	1.66947	1.65686	1.66775	1.53084	1.54832	1.42417	1.60059	1.61248	1.48071	1.42314	1.57884	1.45231	1.55554	1.56995	1.62314	1.49379	1.50106	1.52322	1.54605	1.48916	1.43631	1.40439	1.41078	1.34824	1.42259	1.36753	1.30366	1.4346	1.44582	1.34835	1.50334
1.01967	1.03047	1.01329	0.977353	0.975063	0.980187	0.973572	0.963726	0.939612	0.959845	0.970015	0.983674	1.00753	1.02739	1.02653	1.07086	1.06095	1.06666	1.0835	1.06464	1.0929	1.0794	1.09788	1.0685	1.13736	1.14446	1.1543	1.21491	1.22691	1.2491	1.26487	1.29579	1.32722	1.34051	1.30086	1.38963	1.26591	1.30132	1.35532	1.35729	1.34374	1.37129	1.3275	1.36507	1.32823	1.38249	1.39199	1.31174	1.35366	1.35456
1.6532	1.65173	1.53977	1.52767	1.46729	1.41127	1.3807	1.35142	1.30324	1.19038	1.23623	1.16561	1.17583	1.2088	1.19338	1.14712	1.1965	1.25025	1.23741	1.23106	1.22439	1.20863	1.2149	1.21643	1.23186	1.37606	1.44019	1.52061	1.53676	1.54157	1.5067	1.50833	1.46027	1.44729	1.39726	1.51927	1.4682	1.53051	1.50651	1.48326	1.46071	1.5883	1.48256	1.48478	1.48701	1.44001	1.3994	1.41393	1.42	1.42613
1.63273	1.67288	1.71505	1.72105	1.73949	1.75833	1.78705	1.70599	1.74766	1.73908	1.74949	1.64815	1.65717	1.68817	1.60437	1.64803	1.67489	1.63179	1.5673	1.61923	1.55825	1.64238	1.54579	1.5642	1.56703	1.52214	1.48315	1.47985	1.43917	1.40066	1.36416	1.36022	1.31528	1.3177	1.30901	1.2757	1.24404	1.31253	1.27199	1.35124	1.38792	1.38732	1.42593	1.41046	1.45615	1.44662	1.50489	1.4675	1.46746	1.49708
1.25471	1.30189	1.26553	1.26464	1.29712	1.25832	1.30271	1.28462	1.28075	1.2661	1.23215	1.25107	1.21642	1.20957	1.17405	1.16088	1.13704	1.15192	1.16331	1.18864	1.1729	1.17244	1.1954	1.1687	1.20333	1.20443	1.22247	1.26594	1.24929	1.27768	1.27581	1.28069	1.31016	1.32179	1.32138	1.37167	1.29766	1.32826	1.34505	1.36448	1.42434	1.46684	1.49797	1.53147	1.5367	1.53946	1.52164	1.46021	1.46599	1.43211
1.39247	1.4171	1.71886	1.38493	1.29814	1.19127	1.23419	1.22814	1.20132	1.22435	1.19747	1.11068	1.18216	1.09129	0.998079	0.890845	1.02202	1.12244	1.05025	1.00644	1.33306	1.16991	1.10101	1.05135	1.15942	1.35677	1.39721	1.24953	1.40869	1.361	1.34787	1.335	1.34561	1.45094	1.30955	1.42366	1.19469	1.19863	1.20259	1.33125	1.3666	1.4954	1.44772	1.54576	1.47046	1.56457	1.48821	1.41896	1.37099	1.35616
0.898733	0.912063	1.0368	0.987198	0.908332	0.941179	0.903195	1.03019	0.924397	0.992162	0.985458	1.00934	0.993541	0.978224	1.03924	0.999799	0.979631	0.987751	0.946714	0.801221	0.844299	0.766444	0.848186	0.943134	0.996871	0.975567	1.01315	1.01237	1.0116	1.00937	1.02378	1.00251	0.989628	0.981925	0.976139	0.933704	0.951046	0.969045	1.04131	1.00319	1.00375	1.00431	0.984922	0.935561	0.958787	0.946965	0.937131	0.921787	0.900613	0.949373
1.34199	1.34605	1.34893	1.34479	1.33801	1.25386	1.23833	1.22577	1.35088	1.16356	1.23045	1.18433	1.16501	1.17069	1.18076	1.22616	1.18015	1.21417	1.20198	1.26881	1.22041	1.25361	1.26096	1.2443	1.25756	1.24886	1.24027	1.24137	1.28894	1.16035	1.21181	1.22835	1.24921	1.24873	1.19706	1.2986	1.145	1.19476	1.17885	1.11223	1.18874	1.1442	1.15398	1.13322	1.13589	1.17019	1.06511	1.05127	1.12632	1.10014
0.973602	0.972341	0.971083	0.969828	0.968576	1.00348	1.0227	1.02692	1.01174	1.01166	1.02443	1.00847	1.01552	1.02266	1.0299	1.00635	0.990378	1.0002	0.996075	1.0021	0.981277	0.976025	0.958092	0.952075	0.922324	0.934643	0.917686	0.927383	0.938653	0.915185	0.911975	0.87971	0.883681	0.90535	0.924447	0.868852	0.887765	0.880452	0.873258	0.866181	0.858006	0.853394	0.88813	0.902434	0.921867	0.942155	0.945379	0.948626	0.951895	0.955187
0.891863	0.926411	0.913232	0.927669	0.916296	0.89513	0.872972	0.831159	0.851302	0.872445	0.819061	0.830335	0.85279	0.817987	0.808494	0.815948	0.815567	0.810447	0.819843	0.829856	0.821524	0.830402	0.817277	0.801878	0.837596	0.848719	0.856457	0.863636	0.855392	0.860144	0.864949	0.869808	0.870679	0.871553	0.862093	0.852837	0.892696	0.877686	0.880147	0.876139	0.866448	0.919351	0.924345	0.921575	0.918821	0.900107	0.920296	0.932733	0.930658	0.925241
0.96982	0.997298	1.02638	1.00461	0.983744	1.01463	1.03954	1.12382	1.06528	1.07024	1.07524	1.08724	1.09951	1.09214	1.11964	1.10608	1.14091	1.13333	1.18309	1.17623	1.14419	1.16069	1.16991	1.13826	1.12591	1.12947	1.14224	1.08483	1.13353	1.1278	1.1451	1.13638	1.12348	1.13365	1.12349	1.15888	1.09803	1.12341	1.11806	1.12364	1.10823	1.08131	1.0788	1.08243	1.09483	1.08321	1.07231	1.05925	1.08048	1.07988
1.60642	1.57147	1.58326	1.57793	1.54539	1.5343	1.55319	1.57691	1.60626	1.58983	1.58201	1.58939	1.55634	1.5486	1.59733	1.57711	1.57283	1.59122	1.5736	1.58309	1.5754	1.55124	1.57124	1.52476	1.51333	1.499	1.49656	1.49412	1.50737	1.51419	1.51378	1.50551	1.47509	1.4585	1.51176	1.56906	1.33435	1.41045	1.34632	1.34315	1.33999	1.33685	1.33258	1.32834	1.32412	1.29817	1.32971	1.32706	1.32993	1.31153
1.69162	1.91774	1.83262	1.94982	2.03791	1.9186	1.89748	1.91584	1.97524	1.9239	1.93961	1.88401	1.84511	1.76819	1.65805	1.56083	1.50267	1.49962	1.47126	1.44246	1.38361	1.31171	1.21366	1.17547	1.16539	1.23146	1.29418	1.27971	1.26557	1.23018	1.28445	1.22136	1.20906	1.197	1.19335	1.28155	1.18023	1.22481	1.17579	1.22061	1.20282	1.18554	1.14668	1.12326	1.06269	1.09887	1.1304	1.11729	1.12518	1.18056
																				0.992445	0.969452	0.990204	1.01186	1.0064	1.01743	0.999029	0.986524	1.0321	1.06084	1.09122	1.07993	1.06887	1.08958	1.1111	1.18349	1.11404	1.11799	1.13705	1.1271	1.10708	1.10417	1.09553	1.08703	1.04999	1.05589	1.04838	1.01632	0.992612	0.969988
0.857126	0.858378	0.847778	0.868256	0.887457	0.861919	0.894949	0.870407	0.906797	0.966509	0.908797	1.03795	1.18548	1.10993	0.945645	0.803455	0.825205	0.943802	1.07123	1.11704	1.17494	1.25248	1.25126	1.14376	1.14397	1.14237	1.07773	1.08599	1.09437	1.07581	1.10522	1.09031	1.14438	1.22616	1.2321	1.23981	1.15641	1.21985	1.20473	1.21635	1.20012	1.19499	1.21405	1.21548	1.1539	1.1216	1.18438	1.20044	1.18198	1.23176
1.09873	1.13701	1.05851	1.04528	1.05936	1.01187	0.990017	0.984263	0.978533	0.952093	0.952764	0.946499	0.92771	0.907251	0.886888	0.894902	0.8964	0.902773	0.864703	0.855009	0.850321	0.85563	0.817864	0.849442	0.850483	0.83167	0.829711	0.809728	0.845842	0.825256	0.825881	0.829735	0.832596	0.851364	0.833565	0.899109	0.88298	0.823989	0.850147	0.872686	0.874709	0.909454	0.911487	0.960146	0.948502	1.00142	0.97459	1.00853	1.04238	0.948513
0.996535	1.00963	1.01711	1.02195	0.999392	1.04261	0.992684	0.998225	1.00966	0.982362	0.9565	0.977895	0.993533	0.986055	1.00899	1.01957	0.969833	0.97803	0.987962	0.99275	0.986577	0.980481	1.01132	0.998792	0.986572	1.01005	0.999207	0.98848	1.00088	1.04284	1.05801	1.07469	1.08761	1.10509	1.1005	1.20078	1.10422	1.07586	1.0731	1.07036	1.06564	1.05734	1.02873	1.03773	1.0203	1.00345	0.961599	0.958446	0.950275	0.925146
1.50584	1.49243	1.47925	1.4016	1.46515	1.4563	1.45296	1.43172	1.3834	1.37418	1.35229	1.33529	1.32365	1.31101	1.32199	1.26619	1.31088	1.37132	1.34298	1.31572	1.35061	1.30992	1.32126	1.32536	1.36938	1.37724	1.23924	1.3676	1.35524	1.37142	1.40958	1.18295	1.01911	0.895126	1.47001	1.58356	1.44803	1.4545	1.44194	1.40404	1.35521	1.36964	1.35776	1.37278	1.37055	1.44408	1.49807	1.48868	1.5046	1.50199
1.70455	1.69748	1.69048	1.69199	1.69351	1.6915	1.71804	1.71399	1.63462	1.61353	1.59297	1.58039	1.56799	1.57161	1.57103	1.60317	1.63136	1.6793	1.67073	1.64481	1.65279	1.6282	1.59351	1.58436	1.56296	1.49028	1.44336	1.41884	1.44176	1.40308	1.40721	1.41576	1.47463	1.46024	1.41815	1.51085	1.37509	1.39614	1.37433	1.32269	1.32986	1.33711	1.34146	1.35181	1.39704	1.4454	1.46306	1.45789	1.44739	1.39971
1.44425	1.44265	1.38803	1.38276	1.28736	1.30372	1.33072	1.3031	1.39456	1.33642	1.35088	1.33398	1.34733	1.25443	1.25588	1.25391	1.25194	1.29637	1.23879	1.19898	1.20016	1.24636	1.23275	1.19299	1.21091	1.19638	1.19292	1.18948	1.17407	1.20827	1.20964	1.1924	1.13245	1.0893	1.06735	1.04402	0.980718	0.982686	0.943632	0.933738	0.932247	0.949281	0.966949	0.930416	0.997571	0.99114	0.984791	0.987718	0.990662	0.993624
2.32976	2.38707	2.25099	2.2366	2.23008	2.46492	2.91845	2.96066	3.0041	3.07427	3.14779	2.88409	2.74616	2.64508	2.32007	3.02324	3.04778	3.07272	3.17836	3.19345	3.25453	2.68904	2.67245	2.69785	2.72373	2.53743	2.37499	2.24439	2.40117	2.76924	1.6633	2.27009	2.0756	1.9118	3.06203	1.31797	2.13048	2.99897	1.16602	1.83763	1.95181	2.08111	2.07685	1.2915	1.73524	1.54452	1.84459	1.80737	1.77163	1.51054
1.82697	1.74813	1.67581	1.64861	1.60001	1.56285	1.52738	1.49722	1.47187	1.45477	1.43937	1.42827	1.39989	1.36674	1.35573	1.34489	1.32289	1.3016	1.28099	1.26101	1.26372	1.26644	1.26696	1.26748	1.22521	1.26618	1.30997	1.31325	1.31655	1.27775	1.24118	1.20035	1.09928	1.1155	1.10196	1.06561	1.04957	1.0716	1.09457	1.12214	1.26799	1.35934	1.39229	1.33438	1.27991	1.2224	1.16983	1.14701	1.14314	1.03753
1.14287	1.19177	1.19282	1.19822	1.14617	1.13863	1.13544	1.11835	1.10748	1.11982	1.11562	1.14572	1.17748	1.16066	1.14271	1.16731	1.18289	1.2075	1.15664	1.21181	1.17986	1.14168	1.25591	1.22363	1.19297	1.1638	1.28084	1.28749	1.2327	1.18238	1.13601	1.18134	1.23043	1.22336	1.19427	1.45041	1.23676	1.30015	1.33408	1.24255	1.24613	1.31099	1.21733	1.27537	1.18878	1.28472	1.24535	1.19683	1.31899	1.15831
1.40826	1.38878	1.37062	1.35446	1.32913	1.34953	1.34287	1.33563	1.32847	1.31459	1.3329	1.3197	1.32291	1.31376	1.32793	1.33459	1.32814	1.33095	1.34059	1.31349	1.31108	1.34044	1.33903	1.37209	1.34044	1.355	1.36681	1.37553	1.40072	1.39222	1.4113	1.36815	1.39353	1.3737	1.37938	1.34452	1.31138	1.3787	1.41022	1.38068	1.4006	1.39035	1.37717	1.33954	1.3911	1.34745	1.31871	1.29649	1.27489	1.27861
0.726618	0.782392	0.710376	0.711699	0.692445	0.780988	0.779191	0.795705	0.770422	0.744532	0.723714	0.754795	0.757171	0.723356	0.735976	0.702149	0.844927	0.852481	0.893403	0.900733	0.864237	0.863902	0.874686	0.886875	0.768639	0.854891	0.862393	0.889259	0.838267	0.847375	0.856684	0.866199	0.875927	0.918966	0.858865	0.712906	1.01372	0.82796	0.856402	1.00523	0.972051	0.950895	0.864667	0.802465	0.842882	0.887587	0.898549	1.0064	0.936945	0.895598
1.36008	1.33561	1.29378	1.23703	1.23168	1.17954	1.18992	1.13787	1.12896	1.17579	1.17825	1.18746	1.19681	1.20631	1.19686	1.22164	1.2274	1.26037	1.25132	1.27956	1.24232	1.22352	1.2185	1.18089	1.14553	1.13413	1.1384	1.18819	1.20284	1.20528	1.17365	1.14364	1.11513	1.09449	1.0349	1.02361	1.0518	1.08159	1.10285	1.10297	1.1031	1.09492	1.09751	1.07203	1.07241	1.07279	1.05271	1.09494	1.06436	1.05085
0.981073	0.981271	1.03802	0.952132	0.944409	0.976903	0.94962	0.966226	0.954457	0.973323	0.968829	0.962554	1.00844	1.01811	1.024	1.00608	1.03564	1.15079	1.00607	1.21568	1.15145	1.2364	1.29086	1.17696	1.25446	1.36921	1.54555	1.34309	1.20574	1.35861	1.38135	1.45628	1.50395	1.5671	1.53667	1.61501	1.28728	1.35256	1.3194	1.32475	1.28817	1.23712	1.2182	1.22046	1.1542	1.10143	1.06397	1.04025	1.04934	1.06942
1.23127	1.39477	1.20234	1.25388	1.31003	1.19476	1.15293	1.11394	1.27675	1.22802	1.08235	1.05065	1.17622	1.05927	1.10265	1.14975	1.15749	1.24708	1.34411	1.45751	1.53636	1.5089	1.11849	1.41003	1.09639	1.09328	1.16282	1.24182	1.17481	1.25684	1.31115	1.13095	1.12594	1.00262	0.986989	0.990807	0.994654	0.998531	1.06268	1.22289	1.38287	1.42231	1.16544	1.18906	1.21366	1.39469	1.38774	1.25523	1.23632	1.28889
1.28589	1.37953	1.30525	1.33433	1.38308	1.40404	1.35361	1.31537	1.33296	1.33284	1.33017	1.36054	1.33042	1.34761	1.35488	1.38406	1.30957	1.31242	1.31529	1.29006	1.31179	1.30676	1.35457	1.34744	1.3329	1.3018	1.29145	1.22359	1.2624	1.24493	1.24921	1.26559	1.28251	1.29309	1.27942	1.26604	1.25294	1.26078	1.26872	1.28476	1.27515	1.26626	1.23211	1.21354	1.19552	1.17802	1.19116	1.17986	1.17932	1.14826
2.38617	2.39417	1.96503	1.8851	2.76344	2.07983	2.11499	2.15136	2.23514	2.34967	2.16931	2.32228	2.38016	2.43028	2.48256	2.53714	2.59417	2.49776	2.57625	2.47686	2.75969	2.28914	2.25846	2.22859	2.27527	2.32394	2.22643	2.13677	2.29637	2.31472	2.33336	2.24489	2.28295	2.34852	2.52295	2.72536	2.45682	2.23645	2.05236	2.22819	2.11879	2.10742	2.11264	2.13904	2.11229	2.0862	2.06075	1.89145	2.01549	2.06089
1.47075	1.4357	1.4172	1.39916	1.43956	1.46435	1.40128	1.45424	1.48204	1.46875	1.47063	1.4725	1.47081	1.47969	1.47017	1.46078	1.45151	1.46145	1.47153	1.46304	1.45477	1.4828	1.51284	1.51989	1.527	1.53417	1.53784	1.52609	1.53064	1.51978	1.50907	1.50839	1.50771	1.57431	1.58621	1.88717	1.49522	1.66728	1.64806	1.62928	1.68694	1.67777	1.66869	1.65972	1.6556	1.60244	1.73224	1.72952	1.70429	1.76674
0.936187	1.05566	0.950498	0.938358	1.06223	0.970944	0.974912	0.916547	1.07307	0.9472	0.961713	1.0805	0.915559	0.966503	1.04695	1.03966	0.958615	1.01135	1.09509	1.10003	1.08974	0.975118	1.0092	1.06637	1.11539	0.968715	0.938122	1.06371	0.94929	0.980399	1.01815	0.957792	0.893312	0.969443	0.952025	1.38372	1.00012	0.933384	1.06297	1.05242	0.995413	1.12504	1.20672	1.1615	1.19613	1.21128	1.22682	1.34104	1.48143	1.34078
1.05465	1.06531	1.06598	1.00023	0.944498	0.922489	0.93029	0.940124	0.910626	0.927531	0.934736	0.904389	0.844007	0.911053	0.912373	0.914508	0.973308	0.844231	0.952907	0.943424	0.934128	0.925014	0.84018	0.842388	0.817556	0.794147	0.77204	0.804989	0.840877	0.853262	0.818744	0.837354	0.833343	0.854891	0.834733	0.853582	0.867293	0.820485	0.814268	0.787842	0.85562	0.87598	0.876629	0.884958	0.887354	0.890523	0.89968	0.872256	0.888537	0.88271
1.04383	1.02713	1.06261	1.08646	1.16937	1.13363	1.15282	1.03721	1.14092	1.14684	1.06982	1.13206	1.13205	1.06336	1.03541	1.0089	0.999467	0.992664	1.03155	1.09411	1.15154	1.12269	1.04346	1.01208	1.00104	0.990233	1.03465	1.01917	0.986731	0.986153	0.985576	1.0242	1.01686	0.974165	0.972244	0.926067	0.929643	0.935893	0.924668	0.913709	0.93533	0.936	0.950687	1.11464	1.07646	1.07574	1.07503	1.11271	1.05776	1.01159
5.22787	4.90844	4.64041	4.41913	4.50591	4.19829	3.60313	3.54015	3.91168	4.25498	3.86018	3.11836	3.02827	2.62268	2.42608	2.24563	1.78496	1.67182	1.45901	1.3085	1.25505	1.24151	1.23262	1.27729	1.19843	1.1832	1.19185	1.13099	1.13188	1.12545	1.06877	1.07576	1.05402	1.04725	0.985188	0.971346	0.971181	0.995112	0.97834	1.02217	1.05383	1.02384	1.12261	1.09365	1.1097	1.04647	1.05929	1.10105	1.0205	1.04805
2.5532	2.42279	2.61141	2.11178	1.70959	2.32499	2.11625	1.29137	1.21724	1.15116	1.90964	5.59818	5.35846	5.13843	4.93576	4.25508	3.73939	3.33518	3.44062	3.55294	3.67284	3.80112	3.93869	4.481	4.26407	4.06718	3.88766	3.72333	3.57232	3.43308	3.39785	3.61277	3.85672	4.136	4.29776	3.4525	2.88508	4.70361	4.50205	4.31705	4.14666	3.98921	3.84327	3.70764	3.58126	3.4632	3.35268	2.64082	2.90985	3.2399
1.52441	1.51061	1.46289	1.46152	1.44112	1.42886	1.47086	1.45982	1.38071	1.38055	1.39827	1.39712	1.35273	1.39917	1.39533	1.41288	1.41015	1.44563	1.49035	1.497	1.53202	1.49254	1.5255	1.51847	1.5102	1.56849	1.58532	1.57105	1.58229	1.58955	1.55329	1.61195	1.60835	1.61604	1.60281	1.6291	1.65626	1.89466	0.943933	0.821717	0.871636	0.865703	0.859849	0.854075	0.956821	1.08767	1.05438	1.0399	1.07105	1.2146
1.59253	1.56668	1.54647	1.53712	1.56658	1.57188	1.57722	1.58192	1.59211	1.57236	1.61872	1.58992	1.55494	1.57029	1.50361	1.51801	1.51446	1.51885	1.50023	1.48205	1.48887	1.48713	1.45469	1.45131	1.41371	1.39973	1.3778	1.36473	1.35191	1.36431	1.34024	1.31701	1.29456	1.31966	1.34575	1.37289	1.2899	1.21638	1.22529	1.23035	1.2392	1.23215	1.22517	1.21828	1.18075	1.16246	1.14472	1.12751	1.08857	1.08636
0.827393	0.818474	0.809745	0.8012	0.841694	0.809174	0.819391	0.818924	0.818456	0.792396	0.816941	0.843055	0.826758	0.81108	0.773315	0.793656	0.77684	0.805231	0.826136	0.81643	0.806949	0.819357	0.832154	0.845356	0.871673	0.868267	0.868498	0.883712	0.876122	0.868662	0.891348	0.91525	0.897938	0.87622	0.887985	0.90007	0.912489	0.89494	0.887816	0.909662	0.932609	0.936527	0.943884	0.937274	0.945156	0.953172	0.946455	0.949867	0.932765	0.939303
3.70517	3.39865	2.8415	2.61812	2.58249	2.4164	2.1994	1.9606	1.95226	1.86899	1.77578	1.67468	1.61136	1.59278	1.54881	1.535	1.55243	1.59382	1.52635	1.59409	1.5346	1.75348	1.71328	1.61253	1.52601	1.45659	1.48469	1.53983	1.45213	1.43405	1.32578	1.24083	1.24822	1.38544	1.28355	1.30864	1.19016	1.17459	1.11378	1.19127	1.13227	1.12287	1.13292	1.17375	1.1431	1.16789	1.20584	1.26214	1.25875	1.25538
1.17349	1.22135	1.19176	1.22885	1.20579	1.19618	1.18672	1.18713	1.21765	1.20818	1.19129	1.17058	1.19332	1.19113	1.18793	1.21248	1.23805	1.23962	1.2304	1.23842	1.27528	1.31441	1.29065	1.26372	1.27189	1.25507	1.21327	1.20004	1.15438	1.17943	1.13489	1.17789	1.12976	1.17057	1.16072	1.15104	1.07097	1.12348	1.09948	1.0765	1.05445	1.07632	1.07516	1.05371	1.0331	1.05602	1.05814	0.991537	1.0334	1.04571
1.39366	1.3602	1.37901	1.39834	1.41823	1.43869	1.41516	1.39239	1.37035	1.34899	1.31598	1.28456	1.27383	1.25126	1.22948	1.24852	1.20801	1.17005	1.16865	1.16725	1.16586	1.10596	1.15344	1.15014	1.17036	1.15526	1.16908	1.13832	1.12991	1.12162	1.11345	1.08636	1.09091	1.06541	1.13345	1.08428	1.03921	1.04826	1.05748	1.06685	1.04767	1.02916	1.0113	1.00839	0.958718	0.969693	0.980923	0.932886	0.954392	0.945849
1.65467	1.64094	1.62744	1.62069	1.57447	1.56332	1.53635	1.54588	1.55234	1.54466	1.50975	1.5292	1.47333	1.45521	1.45723	1.40913	1.39354	1.40935	1.37192	1.39281	1.40569	1.38506	1.38947	1.40905	1.41414	1.46272	1.43701	1.46405	1.43542	1.40788	1.40241	1.34072	1.28821	1.28038	1.27083	1.33257	1.27157	1.35203	1.38097	1.40332	1.43154	1.3903	1.38401	1.33349	1.25991	1.26322	1.23021	1.2615	1.23885	1.27268
2.1643	2.02335	2.05028	2.24292	2.34811	2.46364	2.33324	2.41164	2.16411	2.3552	2.3282	2.30181	2.27601	2.25078	2.31618	2.3855	2.30722	2.35397	2.40266	2.36696	2.44655	2.13969	2.64982	2.41408	2.32038	2.23367	2.29437	2.07252	2.24724	2.10719	2.08514	2.20582	2.34409	2.07981	2.80689	4.31559	1.61568	2.18496	2.06561	1.95863	2.13332	2.00764	2.013	2.13351	1.96897	2.37748	2.1462	2.02989	2.10586	1.88703
0.990289	0.949217	1.00147	0.978513	0.996531	0.986614	0.974391	0.962226	0.994669	1.01981	0.947371	0.96363	0.985642	0.989016	1.02672	1.00761	1.04969	1.10883	1.11124	1.10513	1.08248	1.08738	1.09232	1.14506	1.18216	1.18798	1.21546	1.19284	1.21934	1.18854	1.20522	1.20549	1.27679	1.21009	1.25935	1.45159	1.27743	1.42695	1.37582	1.32822	1.38737	1.39745	1.37754	1.32213	1.34926	1.37158	1.34002	1.34331	1.33539	1.32178
0.944429	0.969309	0.981809	0.973812	0.943432	0.987022	0.96515	0.967032	0.976312	0.963827	0.976889	0.962465	0.942062	0.93755	0.9373	0.952044	0.961107	0.955081	0.937337	0.937257	0.937178	0.937098	0.94319	0.93274	0.925853	0.914772	0.900228	0.910757	0.895952	0.908325	0.877029	0.893509	0.885518	0.877669	0.871164	0.864755	0.895312	0.89619	0.88704	0.89599	0.893217	0.892869	0.903958	0.896847	0.906233	0.916212	0.910776	0.910539	0.910303	0.907335
1.48212	1.39676	1.46521	1.40456	1.4551	1.41947	1.39803	1.37312	1.32814	1.28603	1.24649	1.19913	1.16221	1.173	1.18399	1.16932	1.13456	1.12747	1.12961	1.1525	1.25194	1.3009	1.21456	1.37962	1.36863	1.38444	1.37623	1.3376	1.37091	1.34934	1.3769	1.41218	1.45366	1.39275	1.40668	2.00701	1.3806	1.55296	1.61616	1.68475	1.74323	1.84953	1.82674	1.84693	1.84043	1.81733	1.78949	1.90328	1.97481	1.90432
																					1.33423	1.23639	1.22518	1.2006	1.17698	1.15839	1.16438	1.22094	1.17278	1.12827	1.15044	1.12486	1.17472	1.12573	1.12482	1.12392	1.15282	1.16311	1.15499	1.14448	1.158	1.16202	1.15089	1.21747	1.2043	1.19142	1.2088	1.20076	1.19283
0.883682	0.859685	0.839278	0.842461	0.825765	0.826844	0.835326	0.836458	0.837592	0.838652	0.834132	0.812383	0.791739	0.785391	0.786231	0.785031	0.767455	0.750649	0.758152	0.74006	0.719025	0.688471	0.706711	0.696439	0.707818	0.71569	0.714266	0.708251	0.724099	0.72911	0.734192	0.727211	0.72761	0.738786	0.736959	0.687975	0.755857	0.723623	0.725398	0.727181	0.728973	0.722668	0.734245	0.732829	0.731418	0.724431	0.721063	0.690848	0.687868	0.684914
0.788736	0.768881	0.750002	0.737724	0.725841	0.732929	0.740157	0.702028	0.720469	0.677012	0.722706	0.722897	0.723089	0.68701	0.686668	0.695985	0.705557	0.721176	0.737502	0.730411	0.682564	0.711582	0.684167	0.776651	0.74389	0.71378	0.751923	0.763386	0.775204	0.816539	0.86253	0.842329	0.823053	0.80464	0.787033	0.770179	0.778496	0.805633	0.753672	0.882471	0.833099	0.788959	0.842529	0.769712	0.797332	0.826661	0.794447	0.764649	0.796558	0.784698
																		0.852203	0.900299	0.902433	0.904576	0.913416	0.922431	0.906151	0.890435	0.931411	0.92857	0.908898	0.895923	0.883313	0.857549	0.843822	0.830528	0.817647	0.805159	0.881526	0.852066	0.836904	0.838927	0.840959	0.843002	0.845054	0.837482	0.830045	0.810628	0.8056	0.806952	0.808308	0.809669
1.84104	1.84278	1.83804	1.86658	1.85135	1.83679	1.82888	1.81943	1.78274	1.77156	1.76622	1.71372	1.82152	1.76785	1.81832	1.79779	1.77719	1.78506	1.78399	1.77757	1.77517	1.7064	1.73753	1.70943	1.66012	1.74849	1.73346	1.71504	1.72188	1.70425	1.65832	1.7306	1.73835	1.72046	1.73941	2.08262	1.52048	1.73656	1.75133	1.76603	1.79867	1.77871	1.75881	1.72147	1.7252	1.66983	1.67022	1.64323	1.60418	1.58598
1.21331	1.15903	1.14649	1.11547	1.08756	1.06932	1.09363	1.08128	1.05505	1.04825	1.03846	1.04363	1.03754	1.07414	1.07526	1.07247	1.05116	1.05657	1.07031	1.06889	1.08342	1.06491	1.08464	1.04917	1.03298	1.0302	1.03039	1.04531	1.01884	1.0055	0.986817	1.00359	1.00842	0.994373	0.986118	0.979095	0.982844	0.986621	0.990428	0.994264	0.999776	0.987857	0.97622	0.952005	0.951625	0.951245	0.927733	0.938538	0.939825	0.930194
1.02395	1.03106	0.995387	0.995064	1.00767	1.02061	1.01385	1.0253	1.03102	1.07707	1.07273	1.09213	1.08903	1.08595	1.08288	1.08071	1.08372	1.11957	1.06988	1.04771	1.08849	1.13005	1.12166	1.1134	1.15466	1.08816	1.05345	1.10121	1.12572	1.08956	1.11887	1.14011	1.18502	1.11092	1.08623	1.06255	1.03987	1.02649	1.01345	1.04878	1.01243	1.01292	1.00267	1.01647	1.0096	1.01508	1.02063	1.02623	1.0319	1.03763
1.31818	1.31212	1.29159	1.29412	1.2873	1.2898	1.25458	1.26016	1.21635	1.1818	1.17065	1.16841	1.18821	1.1709	1.17675	1.20517	1.16433	1.17369	1.1859	1.23885	1.29598	1.32552	1.41632	1.49186	1.50846	1.50438	1.4748	1.42277	1.4157	1.40171	1.44277	1.47311	1.42582	1.45769	1.43549	1.51951	1.43711	1.48367	1.46705	1.4785	1.46315	1.50145	1.46155	1.41391	1.40864	1.35384	1.34658	1.31696	1.30775	1.27555
1.1819	1.21084	1.21554	1.19699	1.19637	1.20433	1.21637	1.21032	1.21317	1.29837	1.27797	1.24385	1.20608	1.21216	1.21119	1.22251	1.22735	1.25046	1.17845	1.19088	1.23227	1.21128	1.22874	1.24923	1.2111	1.1847	1.15834	1.17103	1.18275	1.11098	1.09073	1.0953	1.08578	1.0971	1.09287	1.10383	1.05285	1.07508	1.10364	1.08203	1.08227	1.08261	1.08404	1.09856	1.09935	1.09677	1.0942	1.07703	1.09645	1.051
1.78341	1.88945	1.88075	1.98092	1.97584	2.64098	1.81484	1.72876	1.65049	1.70973	1.93941	1.75816	1.6702	1.6812	1.56908	1.70714	1.57589	1.58915	1.62939	1.5123	1.47965	1.44837	1.41839	1.51469	1.42936	1.35011	1.33656	1.29307	1.32571	1.30881	1.33976	1.35982	1.38049	1.41648	1.39777	1.55055	1.50956	1.47069	1.43376	1.45093	1.48929	1.46593	1.44328	1.45606	1.43172	1.40818	1.36875	1.33916	1.332	1.32843
1.53301	1.53455	1.53609	1.54752	1.55913	1.5709	1.58286	1.72214	1.88828	2.08991	1.80223	1.93753	2.0948	2.07665	1.994	2.03863	1.90098	2.21118	1.94427	1.73485	1.60703	1.49675	1.33694	1.20797	1.24519	1.19523	1.14913	1.10577	1.06555	1.02816	0.947881	0.938023	0.928367	0.918909	0.948557	1.0072	1.00691	0.994786	0.986474	1.0136	1.04226	1.03026	1.01854	1.00708	1.00941	1.01175	1.01411	1.01647	1.01055	1.0047
1.45381	1.49339	1.60861	1.53156	1.70705	1.63396	1.65283	1.67213	1.59352	1.52197	1.57762	1.46293	1.40479	1.42705	1.61613	1.45097	1.48157	1.57402	1.5359	1.40859	1.40848	1.43949	1.47081	1.44676	1.38583	1.40051	1.40788	1.43036	1.52689	1.48736	1.47237	1.41153	1.43575	1.46457	1.48714	1.6709	1.38365	1.39126	1.37741	1.39525	1.4809	1.52083	1.50074	1.53653	1.68751	1.69581	1.64604	1.52319	1.4174	1.32536
2.34113	1.81686	1.91535	2.02513	1.9585	2.52161	2.17471	2.09752	2.2388	2.23457	2.23037	2.17106	2.07175	2.22796	2.06295	2.19613	1.9642	1.85141	2.00541	2.08708	2.06503	1.93819	1.93365	2.00961	1.7968	1.85226	1.91008	2.02326	1.88229	1.88784	1.80839	1.90777	1.94293	1.80235	1.92983	2.14323	1.69464	1.72677	1.82777	1.79635	1.78553	1.76332	1.96376	1.7758	1.81789	1.70622	1.64715	1.58854	1.6517	1.83939
1.59836	1.62484	1.62166	1.6387	1.64988	1.6382	1.63124	1.62433	1.63509	1.64219	1.59317	1.57762	1.60421	1.56313	1.58068	1.58113	1.58789	1.58741	1.60187	1.58107	1.58594	1.57693	1.62425	1.59466	1.58989	1.58781	1.58365	1.57951	1.60352	1.62828	1.5734	1.57955	1.58574	1.60451	1.71028	1.83096	1.50411	1.59242	1.58754	1.58269	1.57787	1.57301	1.53513	1.49857	1.49238	1.48623	1.48806	1.48988	1.48038	1.47604
0.935965	0.913874	0.905296	0.884447	0.810134	0.848937	0.749374	0.791682	0.790679	0.790376	0.748216	0.771281	0.783859	0.851224	0.868971	0.864889	0.860845	0.864781	0.868752	0.869116	0.881171	0.882062	0.882954	0.805498	0.868006	0.879983	0.892296	0.866338	0.954635	0.957916	0.942832	0.947975	0.916766	1.17639	0.978877	1.0722	0.953237	0.941491	0.926672	0.912312	0.831406	0.867987	0.907936	0.893668	0.879841	0.878496	0.831375	0.852851	0.875467	0.899314
																													0.92924	0.945062	0.961432	0.967125	0.955861	0.985326	1.01666	1.05006	1.10011	1.11329	1.08967	1.08219	1.0748	1.06752	1.06034	1.05326	1.04626	1.03936	1.03255	1.02583	1.04263
1.11511	1.13822	1.16231	1.15091	1.28134	1.41348	1.57599	1.47719	1.48899	1.50098	1.35277	2.7579	1.52907	1.97917	2.27304	2.17234	1.94184	2.13274	1.94383	1.78566	1.65129	1.53573	1.43529	1.34718	1.26926	1.19986	1.15823	1.13615	1.21648	1.3352	1.3534	1.23432	1.31173	1.18303	1.19119	1.2169	1.00516	1.16287	1.11347	1.16705	1.05432	1.05802	1.03077	1.00489	0.970985	0.939295	0.909608	0.88174	0.899048	0.91705
1.18608	1.11824	1.15666	1.05008	1.10179	1.15885	1.13291	1.3639	1.25137	1.26482	1.27857	1.3647	1.46328	1.31813	1.19918	1.2641	1.35851	1.3743	1.44663	1.52699	1.45132	1.36653	1.35697	1.34754	1.39555	1.32043	1.32147	1.32252	1.32357	1.23141	1.29426	1.29466	1.29505	1.29545	1.26517	1.23626	1.20865	1.32075	1.34972	1.31163	1.27564	1.24157	1.27104	1.30195	1.3344	1.33388	1.33723	1.34059	1.44364	1.37321
1.44622	1.40646	1.48111	1.42325	1.48475	1.47823	1.49884	1.46936	1.466	1.46265	1.45931	1.43258	1.44658	1.4005	1.34437	1.33942	1.28065	1.19549	1.10645	1.08931	1.08471	1.08015	1.07025	1.06819	1.03518	1.03956	1.05777	1.04525	1.05751	1.06832	1.08316	1.09842	1.09704	1.09566	1.04928	1.05486	1.0605	1.12622	1.06275	1.09201	1.09914	1.05761	1.083	1.01723	1.01028	1.00343	1.04706	1.03972	1.05355	1.03089
1.69149	1.74446	1.81029	1.71793	1.7726	1.84648	1.78353	1.58999	1.82192	1.64572	1.73094	1.77267	1.85126	1.79246	1.82424	1.82599	1.65791	1.71443	1.65136	1.35832	1.51706	1.48942	1.59788	1.40142	1.24799	1.15965	1.28775	1.24612	1.33169	1.32478	1.26746	1.28488	1.28709	1.29092	1.30086	1.51243	1.22348	1.28551	1.26821	1.30183	1.25937	1.28509	1.24646	1.24991	1.2589	1.21952	1.2105	1.18164	1.18356	1.18549
0.928437	0.904372	0.877391	0.873967	0.916272	0.876162	0.839417	0.968478	0.896096	0.915622	0.843857	0.864754	0.896928	0.88147	0.887371	0.893352	0.899414	0.905559	0.911788	0.918104	0.878937	0.874921	0.92314	1.01373	1.26259	1.21836	1.21097	1.10999	1.11257	1.06013	1.00807	1.01772	1.01531	0.998221	0.981695	0.944299	0.980959	0.94909	0.885478	0.879362	0.862438	0.846154	0.830473	0.836736	0.843094	0.874988	0.861779	0.821482	0.828254	0.835137
1.85352	1.98874	2.14525	2.32849	2.47705	2.62967	2.51374	2.40759	2.02635	1.4939	1.18303	0.979262	0.835373	0.803041	0.867153	0.827479	0.805256	1.00959	0.809428	0.875541	1.03624	0.840437	0.926758	1.27051	1.30139	1.31995	0.876258	1.15239	2.00344	2.10999	2.2285	2.33384	1.82609	1.91666	2.01669	1.84127	1.69392	1.12447	2.08613	1.73247	2.15599	1.83964	2.06569	2.35508	2.47757	2.4734	2.48355	2.49378	1.76044	2.52781
1.11596	1.17213	1.12864	1.11245	1.09671	1.17362	1.09525	1.11516	1.11281	1.11048	1.10815	1.10583	1.13061	1.15651	1.14752	1.20701	1.18605	1.2818	1.25066	1.27787	1.3063	1.26807	1.23201	1.23426	1.28122	1.2401	1.20154	1.23469	1.26973	1.20945	1.1924	1.17582	1.15969	1.06994	1.07121	1.07248	1.07293	1.06342	1.05407	1.08836	1.08881	1.12783	1.12924	1.13066	1.14573	1.16122	1.15237	1.14365	1.18418	1.15365
1.10932	1.20422	1.17517	1.02955	1.12854	1.13572	1.17557	1.14835	1.12473	1.13552	1.05108	1.09117	1.09115	1.10284	1.08319	1.06941	1.0715	1.05985	1.09044	1.05536	1.04542	1.06377	1.07481	1.09867	1.0516	1.06319	1.10312	1.0981	1.04998	1.10139	1.1112	1.09864	1.11894	1.09842	1.11963	1.2036	1.08578	1.07436	1.08163	1.08008	1.07249	1.065	1.05761	1.1098	1.07803	1.112	1.14817	1.15509	1.16209	1.16917
1.18189	1.18186	1.18183	1.19548	1.20946	1.1958	1.18244	1.16937	1.15659	1.14409	1.15311	1.16228	1.17159	1.18105	1.19706	1.24271	1.22466	1.20714	1.19011	1.26741	1.19577	1.1318	1.07284	1.01971	0.988442	1.03837	1.08022	1.06296	1.04624	1.07205	1.09916	1.12769	1.15773	1.18942	1.22289	1.2583	1.22159	1.18696	1.18249	1.17804	1.17364	1.18416	1.22188	1.21101	1.20034	1.18986	1.17956	1.17346	1.21678	1.25673
1.62417	1.91657	2.33737	2.40022	2.46654	2.56139	2.77021	2.55997	2.37939	2.39197	2.4502	2.51135	2.57562	2.64326	2.71456	2.78981	2.86935	2.95356	2.2702	2.86355	2.37223	2.38834	2.21084	2.0579	1.9828	1.47667	1.75367	2.17008	1.97845	2.10366	1.72632	1.57498	1.52499	1.47808	1.43397	1.39242	1.3532	1.31614	1.28105	1.75634	1.2789	1.38509	1.44917	1.2919	1.27757	1.26355	1.24984	1.2555	1.2954	1.33792
1.44207	1.4159	1.45482	1.41671	1.41192	1.40408	1.39632	1.31582	1.31177	1.26546	1.22232	1.18202	1.14429	1.10889	1.06042	1.016	1.04144	1.06818	1.00974	1.01699	1.02434	1.02883	1.03336	1.03793	1.01351	1.02085	1.02204	1.02323	1.02443	1.02563	0.995977	1.00675	0.990259	0.974301	0.95885	0.956824	0.954807	0.952799	0.950799	0.955265	0.959774	0.964325	0.96892	0.973558	0.978242	0.975698	0.973167	0.965512	0.957978	0.95056
1.09103	1.0681	1.04612	1.04598	1.04584	1.10636	1.06581	1.06721	1.09482	1.08307	1.07157	1.00397	0.999242	0.994559	0.963187	0.933733	0.906027	0.910807	0.915639	0.894256	0.921137	0.949685	0.910374	0.816053	0.857274	0.898831	0.906108	0.894218	0.882635	0.871349	0.844309	0.850935	0.851462	0.832898	0.819667	0.835843	0.85267	0.844138	0.835775	0.831023	0.819018	0.845426	0.857775	0.854766	0.851779	0.815974	0.820882	0.82585	0.822147	0.805968
1.03705	1.05516	0.97332	0.943029	0.894804	0.930048	0.885291	0.859764	0.835667	0.910984	0.879349	0.902505	0.916854	0.931666	0.930594	0.929524	0.928457	0.927392	0.965848	0.952727	0.939957	0.927525	0.91309	0.905925	0.898872	0.97111	0.975598	0.921187	0.933703	0.946563	0.959783	0.973378	0.987363	1.01614	1.04665	1.0329	1.0195	1.00645	0.993728	0.981323	0.969224	0.95742	0.9459	0.934654	0.970762	0.941999	0.979076	0.98103	0.982993	0.972091
	1.03223	1.01506	0.998441	0.98236	0.966789	0.951704	0.943519	0.935474	0.927565	0.96707	0.949066	0.907876	0.949704	0.979904	1.00709	0.986111	0.966671	0.947982	0.976254	0.938803	0.974478	0.940047	0.935074	0.918486	0.88598	0.902545	0.849758	0.853739	0.883512	0.914576	0.937904	0.948949	0.938656	0.917169	0.914053	0.950418	0.950275	0.959012	0.97284	1.00625	1.01601	1.01707	1.03235	1.06645	1.03865	1.03663	1.00699	1.03381	0.986073
	5.60247	5.75195	5.90961	5.7075	6.31442	6.00484	5.78327	4.56811	4.87724	4.81956	3.90695	2.56532	2.61334	2.659	2.09812	1.67372	1.91656	1.64615	1.29264	1.37969	1.28385	1.19859	1.09411	1.25203	1.25012	1.30138	1.22985	1.25307	0.970344	0.934312	1.14262	1.14549	1.11332	1.06885	1.17048	1.06009	0.989525	1.1543	1.02232	1.15806	1.05219	1.06227	1.02528	1.06438	0.998467	0.971321	0.856243	0.925824	1.02272
	1.45663	1.44303	1.39424	1.4255	1.4582	1.39965	1.40514	1.41068	1.34466	1.38203	1.3838	1.40108	1.44605	1.45123	1.46071	1.49378	1.59089	1.63356	1.5694	1.64127	1.71407	1.68358	1.65416	1.59579	1.61976	1.54234	1.55062	1.57644	1.55519	1.56576	1.49594	1.46198	1.43368	1.5392	1.72187	1.60122	1.49636	1.45693	1.48479	1.38392	1.32626	1.33945	1.3487	1.32519	1.3334	1.32527	1.39316	1.27634	1.30817
	1.15431	1.11103	1.10423	1.09753	1.08445	1.07684	1.06934	1.08954	1.0972	1.07879	1.11763	1.09332	1.07517	1.1088	1.10563	1.10247	1.15149	1.10209	1.16843	1.21218	1.20491	1.22825	1.25251	1.22222	1.23117	1.24027	1.29595	1.29037	1.317	1.27562	1.27229	1.26899	1.17493	1.21835	1.2651	1.25818	1.25134	1.24457	1.23787	1.23124	1.22469	1.23264	1.20368	1.24532	1.20284	1.22191	1.19882	1.17658	1.15516
	1.92904	1.90425	1.96049	1.8759	1.7968	1.87601	1.80946	1.69722	1.67091	1.65786	1.70294	1.68418	1.62846	1.68446	1.64674	1.61066	1.60314	1.59568	1.57069	1.63782	1.68078	1.72606	1.69018	1.67884	1.66582	1.63787	1.64826	1.64094	1.63894	1.6103	1.58836	1.53	1.51765	1.55683	1.6857	1.40886	1.47667	1.51079	1.51337	1.52108	1.52887	1.55964	1.52203	1.52734	1.51554	1.53711	1.55931	1.56415	1.56902
	1.06537	1.06267	1.05997	1.06886	1.06884	1.087	1.10579	1.12524	1.15195	1.1818	1.21322	1.24637	1.25917	1.24356	1.25362	1.25879	1.18529	1.14802	1.16458	1.15124	1.19393	1.13198	1.14802	1.09772	1.05164	1.00927	1.11848	1.07893	1.07511	1.0343	1.072	1.11255	1.11284	1.11312	1.11341	1.06029	1.10185	1.14679	1.22139	1.28814	1.2504	1.21482	1.15811	1.11947	1.08332	1.04943	1.01625	0.985092	0.974006
	0.684118	0.678173	0.67233	0.666588	0.660942	0.654086	0.670897	0.67144	0.671984	0.672529	0.680442	0.692306	0.704592	0.717321	0.685411	0.705261	0.715529	0.726101	0.736989	0.673737	0.750718	0.718613	0.712226	0.705952	0.680066	0.656012	0.633601	0.632246	0.630293	0.628352	0.626423	0.624506	0.6226	0.620706	0.618824	0.628786	0.639075	0.625793	0.741169	0.73036	0.719862	0.709662	0.699747	0.690105	0.687294	0.676239	0.665534	0.655163	0.671374
	1.2336	1.25385	1.27478	1.18712	1.256	1.22776	1.18358	1.24065	1.24195	1.24325	1.21043	1.17718	1.1457	1.18088	1.18398	1.1871	1.19023	1.19339	1.19655	1.16566	1.19918	1.19037	1.18168	1.17312	1.16468	1.15636	1.16592	1.17565	1.18553	1.19559	1.18127	1.16729	1.15363	1.17304	1.19311	1.10824	1.21549	1.22434	1.23332	1.27598	1.32171	1.25148	1.28433	1.24421	1.24622	1.24824	1.23813	1.22818	1.23618
		1.5703	1.55625	1.54244	1.52888	2.48474	2.46266	2.5251	2.59079	2.53174	2.47532	2.57467	2.30205	2.29803	2.29402	2.26667	2.2057	2.28942	2.16924	2.43313	2.47345	2.51513	1.96493	2.20158	2.05767	1.9855	1.94138	1.97843	1.91843	1.97833	2.04209	1.96889	2.08657	2.24103	2.42019	1.69966	1.89752	2.01851	2.04459	1.95156	1.96744	2.06547	1.69737	1.93106	1.9654	1.50802	1.64708	1.54483	1.65969
		1.29157	1.32547	1.25934	1.1995	1.18315	1.16724	1.15176	1.13668	1.12156	1.10846	1.09566	1.08315	1.13231	1.1242	1.12827	1.13236	1.14975	1.17264	1.19603	1.22039	1.21484	1.20935	1.21765	1.22355	1.23046	1.2996	1.27541	1.34789	1.31013	1.27599	1.24358	1.21278	1.27035	1.3003	1.15516	1.20094	1.21405	1.20866	1.20331	1.19801	1.23165	1.21087	1.17582	1.23804	1.21344	1.25895	1.21685	1.24138
		0.860295	0.872755	0.842229	0.858073	0.874524	0.852556	0.888012	0.877524	0.89487	0.852226	0.845746	0.867453	0.82426	0.889382	0.89456	0.9169	0.895302	0.890304	0.885361	0.929546	0.863414	0.903165	0.880938	0.822626	0.877309	0.860231	0.871502	0.883072	0.882286	0.886319	0.890389	0.885114	0.879902	0.849252	0.916881	0.884921	0.881914	0.878928	0.915642	0.930392	0.979987	1.03517	1.00415	0.974937	0.968239	0.961632	0.9493	0.941167
		1.30772	1.3013	1.29436	1.28749	1.28069	1.27397	1.26731	1.26072	1.25421	1.25965	1.26515	1.2707	1.27629	1.28193	1.28763	1.29337	1.29917	1.30649	1.30746	1.29595	1.28464	1.27352	1.30769	1.32615	1.34513	1.26908	1.3439	1.30682	1.31979	1.327	1.31756	1.29766	1.27835	1.29369	1.21858	1.21659	1.21328	1.16428	1.2506	1.23408	1.21953	1.20532	1.20785	1.19657	1.21947	1.19761	1.17652	1.15616
			1.12645	1.14324	1.16055	1.17286	1.19875	1.23316	1.23602	1.25549	1.24167	1.24987	1.25413	1.26375	1.27547	1.30913	1.29405	1.26954	1.24171	1.28712	1.22922	1.21713	1.20208	1.18444	1.14378	1.14661	1.14944	1.18161	1.11038	1.12819	1.10465	1.12007	1.11394	1.10083	1.11619	1.08152	1.05024	1.07041	1.0955	1.08894	1.07151	1.06599	1.05977	0.99399	1.00266	1.01199	1.02767	1.02138	1.04344
			1.0963	1.08997	1.08059	1.07137	1.07844	1.05532	1.08533	1.04072	1.01904	1.04638	1.04358	1.03779	1.03207	1.06736	1.06361	1.12486	1.11297	1.10132	1.08701	1.09647	1.13089	1.09561	1.09227	1.08894	1.11417	1.10396	1.10012	1.10185	1.10232	1.08432	1.07001	1.05608	1.05452	1.05297	1.07408	1.05419	1.03503	1.04187	1.02635	1.0547	1.02552	0.985381	0.991468	0.991254	0.97866	0.976542	0.93351
																														1.47149	1.5177	1.56692	1.47389	1.47714	1.85851	1.37551	1.5781	1.57447	1.57085	1.58691	1.58258	1.55522	1.6961	1.53282	1.55124	2.18593	1.87239	1.63751	1.57358
							1.03839	1.04401	1.04969	1.0377	1.02598	1.01453	0.968497	0.990181	1.01286	1.03118	1.01334	1.04544	1.0219	0.999649	1.01865	1.01597	1.00283	0.997805	0.989863	0.999448	1.01365	1.01889	0.988797	0.98974	1.01033	1.01321	0.994186	1.01038	0.961174	0.97439	0.983397	0.968137	0.979586	1.01996	1.01894	0.98178	0.968883	0.960058	0.951392	0.942881	0.940824	0.926809	0.945002
																										1.04733	1.08434	1.02546	1.00624	0.996099	0.993577	0.974804	0.956726	0.929461	0.903707	0.949437	0.932288	0.915747	0.909149	0.932518	0.905048	0.908169	0.911312	0.907627	0.903972	0.900346	0.896749	0.899452	0.902171
																				5.51697	3.5482	2.61501	2.07047	1.71363	1.46171	1.27436	1.12959	1.01435	0.940016	0.946389	0.952848	0.959396	0.973256	0.850169	0.75472	0.94953	0.892975	0.935625	0.968883	0.965961	0.958937	0.959139	0.913666	0.828945	0.867008	0.892704	0.881389	0.870358	0.91398
													1.4958	1.39616	1.30897	1.23203	1.16363	1.15696	1.15036	1.14384	1.13739	1.13101	1.1247	1.11847	1.16727	1.22053	1.27888	1.38232	1.43976	1.3537	1.27735	1.20916	1.24711	1.28752	1.33064	1.20758	1.33933	1.28031	1.22627	1.17662	1.13082	1.08846	1.04916	1.01259	0.978492	0.90499	0.841759	0.786787	0.753755
																1.49356	1.48861	1.52016	1.48737	1.47809	1.50881	1.46656	1.47568	1.45036	1.4259	1.46393	1.43109	1.5646	1.42278	1.39546	1.40462	1.41389	1.42328	1.45056	1.5382	1.37373	1.44791	1.46931	1.49136	1.44663	1.4971	1.48263	1.44212	1.40377	1.52106	1.41367	1.41808	1.434	1.34756
																																		0.904854	0.905328	0.921436	0.930674	0.952295	0.974946	0.958327	0.969796	0.955454	0.967356	0.939861	0.932894	0.926029	0.935516	0.95973	0.948296
																																														1.79374	1.71588	1.64451	1.57884
																										0.932353	1.00289	1.00126	0.99963	1.01381	1.01754	1.02129	1.02507	1.02888	1.03271	1.03658	1.03681	1.03705	1.10749	1.1882	1.2816	1.39093	1.12761	0.948126	0.927894	0.908507	0.889914	0.917276	0.946373
																																										1.14935	1.09966	1.09372	1.1219	1.09427	1.12657	1.12177	1.12747
																																																0.960054	0.940951
																																					1.07407	1.09145	1.10939	1.09696	1.1099	1.09766	1.07953	1.07459	1.10045	1.09885	1.09725	1.10006	1.10288
																																					1.05056	1.0536	1.05667	1.07205	1.04657	1.0467	1.04683	1.04695	1.03348	0.977838	0.999025	0.990011	0.991979
																																							0.693917	0.697934	0.686384	0.733737	0.715693	0.730379	0.730116	0.740355	0.749809	0.776212	0.780514
																																													1.35816	1.32341	1.29039	1.25898	1.22906
																																															1.1919	1.18037	1.16906
1.40629	1.39107	1.42176	1.42838	1.41778	1.44281	1.45217	1.46268	1.46623	1.4776	1.45509	1.49855	1.48813	1.44464	1.46954	1.49175	1.48184	1.47851	1.49821	1.49752	1.51218	1.49907	1.52735	1.52314	1.53965	1.52757	1.51067	1.4927	1.48877	1.47414	1.48578	1.44918	1.48895	1.49253	1.5034	1.59971	1.37935	1.51365	1.4732	1.48	1.48814	1.4795	1.44291	1.42657	1.43413	1.42927	1.41626	1.42336	1.3995	1.37847
1.16877	1.12756	1.14661	1.11739	1.08961	1.07719	1.08288	1.08863	1.08554	1.09758	1.10988	1.11435	1.11886	1.1234	1.12798	1.1326	1.13781	1.16451	1.17775	1.17594	1.14342	1.15773	1.13474	1.11514	1.11894	1.12779	1.1373	1.14106	1.11447	1.13966	1.15319	1.15307	1.17922	1.1511	1.18951	1.23992	1.21664	1.27397	1.31214	1.34096	1.28972	1.31596	1.28112	1.22184	1.22486	1.20504	1.1662	1.11947	1.12852	1.16745
1.40552	1.17642	1.01153	0.887183	0.896514	0.905456	0.912165	0.935844	0.946161	0.952185	0.969369	0.926175	1.01849	0.980254	1.00709	1.0406	1.08593	1.13899	1.12292	1.13241	1.13008	1.11393	1.10809	1.118	1.10673	1.0865	1.17896	1.0852	1.08832	1.08109	1.18431	1.12133	1.07405	1.18993	1.19914	1.3093	1.20449	1.13811	1.20824	1.23351	1.11399	1.22923	1.25943	1.25165	1.22301	1.0863	1.09581	1.09557	1.08071	1.19739
1.58795	1.58244	1.56316	1.6216	1.63354	1.63605	1.608	1.59858	1.56981	1.52223	1.53553	1.49473	1.56562	1.59447	1.51333	1.45509	1.48092	1.45008	1.50631	1.49621	1.52072	1.5465	1.55824	1.55663	1.58398	1.58811	1.57473	1.56077	1.54608	1.52739	1.5894	1.57058	1.56039	1.58008	1.62303	2.0433	1.4485	1.61764	1.55206	1.56636	1.58092	1.57397	1.57172	1.54465	1.51037	1.55472	1.49332	1.53545	1.53691	1.52338
1.24922	1.22904	1.24549	1.17418	1.21375	1.15441	1.16418	1.1914	1.16689	1.21104	1.17212	1.12266	1.19661	1.20237	1.22252	1.23084	1.23927	1.23567	1.26341	1.2613	1.29385	1.31666	1.2806	1.3148	1.31288	1.33094	1.3185	1.3063	1.29432	1.3515	1.36172	1.34765	1.38323	1.38814	1.32633	1.55094	1.32728	1.37145	1.39902	1.40872	1.41469	1.42071	1.42886	1.43267	1.42269	1.40142	1.39965	1.41132	1.38552	1.44301
1.52321	1.55276	1.5703	1.55502	1.54003	1.52533	1.51017	1.47158	1.45332	1.4355	1.41128	1.52158	1.5312	1.54095	1.51352	1.55097	1.53904	1.57504	1.61287	1.56276	1.55378	1.54662	1.53939	1.52663	1.47882	1.55124	1.57224	1.59383	1.62309	1.58824	1.60142	1.58407	1.59096	1.5743	1.6951	1.83597	1.52184	1.54075	1.56014	1.62731	1.70052	1.67893	1.65788	1.65198	1.66722	1.60629	1.58262	1.56942	1.61021	1.56842
1.50058	1.46627	1.43179	1.47543	1.50839	1.5277	1.47223	1.4931	1.57678	1.56901	1.58974	1.56802	1.56997	1.58234	1.59133	1.43944	1.51052	1.54977	1.47408	1.45215	1.43086	1.44748	1.40952	1.40221	1.39498	1.38781	1.37962	1.38117	1.37187	1.36268	1.30155	1.28861	1.27592	1.31037	1.30551	14.2364	1.17024	1.30468	1.26834	1.29358	1.27837	1.24935	1.32816	1.30796	1.28396	1.26082	1.25255	1.26526	1.24806	1.2645
1.51431	1.47652	1.45977	1.42172	1.44026	1.41967	1.38968	1.41023	1.43139	1.3972	1.38038	1.36702	1.38926	1.37813	1.34886	1.38845	1.41444	1.45161	1.46538	1.46005	1.46903	1.4007	1.39459	1.36907	1.37192	1.38576	1.35094	1.35226	1.35368	1.39186	1.39262	1.39338	1.39415	1.39822	1.39746	1.53279	1.33781	1.41249	1.41884	1.45464	1.45047	1.44855	1.44664	1.44375	1.42532	1.44436	1.42819	1.41836	1.40867	1.41002
1.69749	1.71001	1.70231	1.69086	1.67242	1.64796	1.63719	1.60749	1.61319	1.59534	1.5742	1.52383	1.52029	1.49403	1.48736	1.4719	1.44925	1.43798	1.39251	1.42475	1.42853	1.4159	1.39095	1.42209	1.43613	1.43289	1.46653	1.46144	1.54653	1.59058	1.6054	1.61311	1.5795	1.62097	1.63884	1.90129	1.52077	1.71699	1.72054	1.78009	1.83866	1.87292	1.93539	1.87333	1.86711	1.91312	1.89134	1.88271	1.95046	1.95574
1.16433	1.14776	1.16287	1.16147	1.159	1.13059	1.16853	1.15241	1.17241	1.17708	1.19421	1.16317	1.18747	1.15298	1.20741	1.23089	1.24165	1.20359	1.25058	1.25667	1.21397	1.23203	1.21674	1.21776	1.20667	1.1709	1.20323	1.23147	1.19411	1.24497	1.23522	1.16766	1.13451	1.15152	1.15264	1.16836	1.15566	1.14323	1.14945	1.13071	1.14047	1.11447	1.13861	1.17678	1.11921	1.11754	1.15246	1.13425	1.14129	1.12274
1.57797	1.54731	1.5518	1.52559	1.54541	1.52831	1.51993	1.57794	1.53841	1.61795	1.65695	1.64761	1.61608	1.56337	1.52906	1.56285	1.5039	1.47128	1.44004	1.42679	1.37133	1.35087	1.33101	1.3248	1.28898	1.31185	1.34273	1.34416	1.35323	1.34666	1.34368	1.35575	1.37572	1.35142	1.34835	1.35907	1.32773	1.35012	1.35151	1.39463	1.4087	1.42305	1.41915	1.46791	1.49765	1.52862	1.52696	1.43143	1.49147	1.451
1.35356	1.3301	1.33875	1.34783	1.3133	1.38038	1.31271	1.35236	1.31305	1.26366	1.26317	1.30364	1.27858	1.25992	1.24179	1.22417	1.20705	1.2681	1.26247	1.25689	1.24289	1.2292	1.23422	1.23928	1.23208	1.22497	1.21794	1.21099	1.20411	1.19732	1.1906	1.18396	1.1925	1.21137	1.201	1.23261	1.08889	1.10928	1.10305	1.09689	1.06846	1.0623	1.12044	1.06908	1.05694	1.0504	1.04253	1.05595	1.07334	1.03362
1.93202	1.9517	1.87894	1.80527	1.77422	1.74212	1.72192	1.7123	1.70984	1.71397	1.69163	1.68451	1.73869	1.74622	1.71147	1.70128	1.70309	1.67463	1.67915	1.68578	1.63542	1.62831	1.68708	1.71114	1.73287	1.75769	1.79263	1.77395	1.8726	1.96869	2.02136	2.09668	2.14438	2.14664	2.10392	2.67582	1.83179	1.96218	2.11255	2.10606	2.10499	2.13321	2.10169	2.05585	2.01851	1.98103	1.94491	1.95988	1.93147	1.93762
1.36843	1.34037	1.34046	1.30935	1.28672	1.28472	1.30242	1.28743	1.2834	1.28952	1.28617	1.29351	1.27678	1.30098	1.26696	1.2491	1.24884	1.22361	1.25036	1.24008	1.25378	1.3032	1.29838	1.32092	1.33043	1.31296	1.2734	1.26133	1.2368	1.2132	1.2235	1.21409	1.24356	1.27467	1.30736	1.48406	1.31422	1.2959	1.27807	1.33631	1.32806	1.30721	1.33293	1.32639	1.32062	1.30014	1.26865	1.2526	1.2754	1.27845
1.83098	1.78819	1.77874	1.74179	1.73497	1.76622	1.7332	1.70138	1.72667	1.68087	1.70572	1.75154	1.71553	1.74012	1.72067	1.79571	1.79086	1.79581	1.78918	1.798	1.78312	1.73464	1.77873	1.79562	1.79587	1.80946	1.81287	1.8092	1.81931	1.80694	1.79623	1.77812	1.78891	1.79299	1.74308	1.87279	1.61411	1.66546	1.63518	1.60571	1.62974	1.65737	1.59045	1.58224	1.52727	1.52031	1.48772	1.54715	1.519	1.53251
		1.58198	1.72906	1.90628	2.12399	2.15428	2.13968	2.12367	2.1079	2.09237	2.06102	2.0306	2.02218	2.00865	2.02941	1.97181	2.03031	2.00211	2.01037	1.98136	2.00608	2.02278	2.05225	2.04459	2.03536	2.05568	2.07029	2.03774	2.07735	2.09597	2.07625	2.0727	2.07661	2.10371	2.41766	1.85847	2.09356	2.05788	2.13453	2.09788	2.10836	2.05009	2.07102	2.04458	2.10196	2.05564	1.98662	1.9451	1.92897
1.86817	1.78942	1.807	1.80824	1.84689	1.82777	1.80903	1.79068	1.78723	1.77518	1.7674	1.76194	1.72376	1.71342	1.70321	1.66286	1.66699	1.64728	1.68577	1.69615	1.7124	1.71319	1.71398	1.72134	1.77932	1.78499	1.81522	1.8465	1.86432	1.87898	1.89354	1.91296	1.93278	1.94957	1.96666	1.89145	1.82178	1.90856	1.83762	1.82763	1.81774	1.80797	1.83574	1.86438	1.8714	1.89446	1.86638	1.8602	1.84496	1.80011
1.41751	1.42445	1.3741	1.41114	1.39339	1.38214	1.41239	1.39767	1.40524	1.40402	1.40245	1.40914	1.4126	1.40296	1.42232	1.42056	1.50616	1.42279	1.41576	1.45714	1.45639	1.51749	1.49767	1.54318	1.56328	1.5361	1.53794	1.54828	1.52832	1.53737	1.59521	1.62956	1.53967	1.50956	1.54605	1.70616	1.43507	1.59412	1.6462	1.72002	1.66478	1.69891	1.69818	1.69744	1.66723	1.61318	1.61562	1.58639	1.57806	1.62983
1.47767	1.45517	1.43047	1.42952	1.42857	1.45309	1.40091	1.46821	1.45583	1.44969	1.47257	1.48226	1.4687	1.4984	1.44205	1.48056	1.47489	1.49738	1.50213	1.50455	1.52131	1.51198	1.52072	1.45773	1.51547	1.49408	1.53448	1.44552	1.39811	1.37642	1.38401	1.38472	1.35342	1.41809	1.4041	1.61702	1.28958	1.40454	1.4212	1.40383	1.40428	1.37046	1.37774	1.36816	1.30095	1.33734	1.35451	1.37213	1.39022	1.40486
1.68586	1.68664	1.65622	1.66127	1.63028	1.62938	1.60448	1.61208	1.61788	1.62372	1.62892	1.63965	1.6469	1.63242	1.61482	1.61903	1.59556	1.60719	1.61224	1.60956	1.61241	1.59389	1.57667	1.57989	1.62008	1.62289	1.59682	1.60753	1.58822	1.58877	1.58932	1.59298	1.62	1.55297	1.61147	1.67455	1.43321	1.49727	1.47122	1.58665	1.69981	1.74132	1.81903	1.80855	1.7982	1.73967	1.71545	1.69191	1.61547	1.61997
1.57424	1.53721	1.53392	1.54397	1.56273	1.53406	1.51761	1.51201	1.50646	1.45472	1.47915	1.42841	1.4112	1.42855	1.42316	1.40286	1.39924	1.36742	1.37363	1.3799	1.38994	1.36095	1.37251	1.38455	1.3537	1.32418	1.29593	1.29334	1.26487	1.27651	1.22713	1.23969	1.25387	1.26732	1.26647	1.36361	1.18996	1.21943	1.21855	1.25407	1.2471	1.2402	1.21843	1.1974	1.16028	1.14637	1.14065	1.1235	1.12749	1.12998
1.9586	2.00092	1.94868	1.97702	1.9911	2.01417	1.96629	1.96781	1.9267	1.94263	1.93413	1.93914	1.91471	1.93949	1.94324	1.89296	1.87578	1.88439	1.84079	1.84977	1.8436	1.82291	1.80802	1.8336	1.79893	1.79521	1.74837	1.7667	1.79874	1.83197	1.7681	1.70613	1.74428	1.70615	1.66965	1.79828	1.47717	1.50866	1.54153	1.5367	1.52592	1.52591	1.52591	1.52591	1.49953	1.55199	1.52777	1.5209	1.54171	1.5631
1.13288	1.12039	1.17924	1.11274	1.14975	1.15517	1.17125	1.10739	1.14622	1.05203	1.06715	1.07016	1.05452	1.03932	1.07085	1.10435	1.09722	1.12318	1.12357	1.09641	1.12122	1.12769	1.08086	1.14157	1.07707	1.05114	1.10219	1.12339	1.11454	1.14029	1.13618	1.17816	1.20085	1.22445	1.26638	1.50222	1.26651	1.30325	1.34219	1.39974	1.37117	1.42391	1.38726	1.45467	1.45884	1.44718	1.45899	1.49365	1.49157	1.52264
1.31749	1.30937	1.34778	1.34948	1.36791	1.37997	1.3766	1.36284	1.37615	1.35011	1.38024	1.3985	1.35815	1.39697	1.38422	1.37654	1.35787	1.3802	1.39632	1.36993	1.38427	1.40854	1.46062	1.38706	1.40302	1.40277	1.38057	1.37902	1.38694	1.3551	1.3574	1.34617	1.36584	1.3796	1.39365	1.72111	1.53367	1.38305	1.37682	1.37064	1.37818	1.35427	1.35307	1.3868	1.3294	1.36524	1.34965	1.37668	1.34571	1.30775
1.76296	1.78384	1.75571	1.80174	1.7813	1.75948	1.78212	1.80534	1.79482	1.78442	1.82441	1.84296	1.81936	1.80566	1.86447	1.86938	1.88104	1.85561	1.87505	2.00286	1.90452	1.87243	1.8499	1.81014	1.82276	1.79906	1.77729	1.83987	1.72933	1.69753	1.74625	1.66705	1.68373	1.68166	1.67959	1.8616	1.63497	1.75938	1.64508	1.69801	1.75446	1.69647	1.71435	1.76297	1.71636	1.67924	1.74242	1.73856	1.69151	1.68296
1.1939	1.19048	1.20173	1.1752	1.19582	1.22119	1.20993	1.25306	1.25218	1.26858	1.24	1.241	1.26044	1.28788	1.25901	1.27351	1.26503	1.23893	1.27278	1.26587	1.26993	1.26986	1.29227	1.29721	1.29257	1.29339	1.31885	1.23518	1.22267	1.24294	1.26388	1.22142	1.2348	1.22442	1.21422	1.20419	1.19432	1.18461	1.17506	1.1736	1.17214	1.17442	1.1767	1.20274	1.17506	1.21495	1.22046	1.22602	1.2164	1.23254
1.85787	1.87064	1.86191	2.35197	2.43995	2.27686	2.29543	2.32163	1.92051	2.19888	2.30344	2.12807	2.05902	2.38264	2.30709	2.83238	2.47984	2.4766	2.20553	2.2453	2.49389	2.1799	2.08339	2.14968	2.08299	2.10502	2.00936	2.11345	2.0779	2.08809	2.02259	1.90238	1.7526	1.73736	1.55734	1.71251	1.77695	1.53222	1.40165	1.38587	1.37044	1.46524	1.52985	1.40158	1.55586	1.5096	1.37558	1.40021	1.35838	1.33701
1.44231	1.46524	1.47658	1.47813	1.45692	1.42426	1.42369	1.42312	1.42115	1.42339	1.43835	1.49039	1.48429	1.4722	1.49372	1.50799	1.50284	1.48028	1.46402	1.44811	1.42495	1.41802	1.4186	1.41918	1.4219	1.39823	1.3727	1.38659	1.4019	1.37555	1.40581	1.38902	1.42977	1.47297	1.4782	1.69327	1.34272	1.44566	1.37285	1.45744	1.45268	1.44206	1.45497	1.42624	1.42071	1.41311	1.40559	1.39815	1.39078	1.3717
1.25136	1.25282	1.21206	1.24842	1.22982	1.19193	1.21689	1.22687	1.2313	1.23246	1.2298	1.23057	1.20109	1.20279	1.21033	1.19317	1.20127	1.18414	1.21627	1.23171	1.2477	1.24472	1.20468	1.19122	1.20803	1.16435	1.12196	1.07114	1.10737	1.09458	1.10961	1.10512	1.1183	1.11559	1.11289	1.11425	1.14113	1.17558	1.16593	1.12673	1.18657	1.13561	1.19836	1.25501	1.2528	1.26016	1.27176	1.27587	1.30067	1.3171
1.38776	1.66469	1.64521	1.48787	1.50831	1.45819	1.48262	1.46696	1.45163	1.5195	1.43968	1.34301	1.45007	1.46517	1.38195	1.39324	1.39967	1.40615	1.41511	1.30911	1.35447	1.31235	1.27277	1.2489	1.32414	1.32187	1.31313	1.32149	1.31894	1.35068	1.32346	1.34775	1.32015	1.36958	1.42285	1.51009	1.32689	1.41794	1.52239	1.45759	1.46358	1.48272	1.48094	1.53801	1.57053	1.52369	1.57322	1.57769	1.50217	1.40584
1.73862	1.81375	1.77169	1.80963	1.72625	1.69008	1.64779	1.64558	1.64473	1.61883	1.574	1.60369	1.61032	1.59608	1.5817	1.58341	1.59351	1.60131	1.59065	1.60342	1.62868	1.62268	1.60363	1.58399	1.56332	1.55832	1.54534	1.53257	1.55467	1.54991	1.54828	1.54403	1.52589	1.55143	1.52659	1.6531	1.48382	1.58792	1.61553	1.64413	1.6532	1.66238	1.67166	1.68104	1.61288	1.6054	1.58824	1.60081	1.61357	1.62363
1.50275	1.45108	1.3997	1.45637	1.45979	1.41949	1.42383	1.4326	1.41003	1.398	1.38617	1.37979	1.43427	1.36436	1.41221	1.3754	1.34047	1.3452	1.37554	1.26639	1.34369	1.30934	1.299	1.28882	1.27879	1.26893	1.26635	1.26378	1.26123	1.25868	1.22605	1.19508	1.16563	1.19023	1.16077	1.28064	1.232	1.18693	1.19648	1.20618	1.21604	1.22606	1.23625	1.24661	1.21129	1.17364	1.16714	1.16071	1.15435	1.14806
1.19135	1.23166	1.2748	1.19337	1.24459	1.22308	1.37568	1.57179	1.22434	1.21409	1.28496	1.2517	1.28372	1.35271	1.91801	1.21633	1.28078	1.25052	1.33452	1.75174	1.27105	1.37488	1.49718	1.70205	1.76578	1.87933	1.33701	1.68143	1.54173	1.7334	1.42769	1.84796	1.42502	1.46295	1.61056	3.05554	1.62971	1.86055	1.96	2.38274	2.12845	2.12488	2.50015	2.07408	1.94196	1.83374	1.8332	1.88778	1.9457	2.00729
1.49691	1.47919	1.47387	1.45479	1.46754	1.46804	1.47111	1.4828	1.43074	1.45446	1.41694	1.44047	1.43984	1.43812	1.45088	1.45568	1.47396	1.48381	1.50725	1.50122	1.4814	1.4737	1.48689	1.46431	1.46394	1.46756	1.50745	1.52456	1.55433	1.54683	1.47057	1.49228	1.49782	1.49491	1.55194	1.79919	1.40408	1.57164	1.55264	1.60731	1.59429	1.61866	1.62143	1.6154	1.55766	1.56172	1.56018	1.55865	1.5503	1.52626
1.24398	1.28921	1.27629	1.22906	1.23407	1.18522	1.1858	1.19403	1.20238	1.1556	1.16254	1.15811	1.11175	1.10341	1.11099	1.11868	1.11829	1.11616	1.08623	1.08759	1.09955	1.08224	1.07884	1.04001	1.07482	1.03317	1.03246	1.03504	1.01475	1.03812	1.03978	1.00605	1.0155	1.02513	1.00737	0.994853	0.960549	0.971216	0.962336	0.969335	0.948138	0.953456	0.935462	0.930951	0.933536	0.936135	0.938749	0.934408	0.930106	0.929388
1.67289	1.56762	1.44479	1.41493	1.47298	1.45095	1.46705	1.46313	1.42566	1.3974	1.6229	1.61799	1.65972	1.54478	1.71864	1.69404	1.64295	1.58478	1.56577	1.62468	1.58817	1.64565	1.57835	1.57357	1.62883	1.54358	1.59273	1.56232	1.84945	1.80971	1.76396	1.87479	1.98433	2.10747	2.13443	2.41653	2.1648	2.30662	2.33575	2.47758	2.35893	2.46553	2.43273	2.29354	2.16942	2.11957	2.07063	1.97268	1.92472	2.13679
1.42472	1.43552	1.47044	1.46915	1.48648	1.45017	1.44515	1.48129	1.41567	1.52855	1.4169	1.41682	1.42603	1.38767	1.35133	1.3533	1.35528	1.3774	1.40026	1.36302	1.34962	1.33648	1.3236	1.31096	1.29457	1.27721	1.2603	1.24341	1.22845	1.21155	1.23221	1.27685	1.32482	1.31883	1.36425	1.4129	1.1838	1.24201	1.22185	1.23485	1.24813	1.25506	1.26207	1.26916	1.25306	1.23736	1.22205	1.20712	1.20282	1.18235
1.57303	1.52996	1.55038	1.50258	1.51032	1.59166	1.55307	1.5449	1.55261	1.56242	1.53948	1.54247	1.54547	1.5967	1.62109	1.63172	1.61478	1.59819	1.57768	1.57846	1.57578	1.62093	1.57513	1.58901	1.55176	1.56365	1.55858	1.54039	1.52262	1.54371	1.54433	1.5416	1.51797	1.51852	1.53318	1.60585	1.44434	1.46401	1.48423	1.46251	1.4972	1.51343	1.53749	1.56232	1.52893	1.48854	1.34581	1.32696	1.23625	1.26187
1.16	1.14948	1.14484	1.15568	1.16272	1.14672	1.15265	1.1751	1.16153	1.16704	1.17405	1.19755	1.22102	1.22096	1.25589	1.24086	1.26751	1.28155	1.30048	1.29169	1.27142	1.28582	1.30728	1.30147	1.32337	1.27694	1.28315	1.27625	1.27679	1.27657	1.26905	1.27948	1.29034	1.30764	1.29821	1.38882	1.25018	1.31119	1.3228	1.32648	1.32327	1.33303	1.32368	1.31826	1.32168	1.3083	1.31482	1.32645	1.31741	1.30689
1.4806	1.49611	1.50369	1.48027	1.50829	1.46338	1.46533	1.4881	1.48423	1.49897	1.46971	1.5039	1.46315	1.46175	1.51891	1.52571	1.49119	1.49492	1.50211	1.48006	1.45865	1.44013	1.47398	1.48561	1.4686	1.47517	1.48159	1.4785	1.47201	1.47082	1.46963	1.45272	1.4774	1.43081	1.46062	1.71224	1.45865	1.54334	1.63848	1.65172	1.64128	1.60299	1.59039	1.57798	1.56576	1.5656	1.62398	1.56406	1.59571	1.57835
1.12249	1.07032	1.13985	1.10341	1.10446	1.08967	1.06912	1.09009	1.10766	1.07236	1.06604	1.05758	1.00577	1.13475	1.13851	1.12281	1.14101	1.02344	1.08365	1.15139	1.14243	1.4041	1.82127	2.59111	3.60968	2.60453	3.04584	3.13431	3.13543	3.13654	3.03362	2.93725	2.53953	3.50352	2.61017	2.50367	2.40552	2.31477	2.23062	1.87528	2.65282	2.30358	2.71274	1.66012	1.02073	2.7588	2.13553	2.37289	2.50728	2.72983
1.17153	1.22544	1.19871	1.24694	1.16308	1.38464	1.19231	1.19498	1.20271	1.20855	1.23993	1.24813	1.25643	1.25688	1.28594	1.27094	1.28153	1.2915	1.26931	1.24029	1.24111	1.24193	1.24723	1.19413	1.20261	1.19445	1.1864	1.1393	1.17397	1.16885	1.16378	1.16525	1.16673	1.18246	1.2322	1.28631	1.28921	1.29213	1.29505	1.30005	1.2898	1.29585	1.3197	1.31025	1.31372	1.34848	1.38512	1.39175	1.4242	1.46171
1.56527	1.54626	1.59841	1.61681	1.57504	1.5622	1.54957	1.54728	1.56377	1.52396	1.49226	1.50037	1.51325	1.48617	1.45496	1.51571	1.49211	1.46674	1.49863	1.45184	1.45281	1.44145	1.42985	1.37934	1.41569	1.37928	1.36862	1.37947	1.37758	1.357	1.45019	1.43686	1.4282	1.41965	1.36279	1.4628	1.26223	1.26976	1.27738	1.26585	1.31021	1.30531	1.36416	1.31287	1.26531	1.28819	1.20007	1.22009	1.24079	1.21352
1.49135	1.43063	1.53224	1.4865	1.44341	1.54834	1.44895	1.44759	1.46892	1.49089	1.51093	1.48705	1.50344	1.48036	1.53649	1.50459	1.50329	1.50199	1.51219	1.51571	1.52841	1.54132	1.57134	1.57348	1.63231	1.57276	1.60649	1.5901	1.55939	1.58535	1.60106	1.63386	1.64778	1.68743	1.72713	2.03618	1.69261	1.85638	1.86376	1.91055	1.89414	1.878	1.87965	1.87643	1.81031	1.81108	1.78018	1.72025	1.70832	1.71358
1.49096	1.52521	1.47639	1.47182	1.46729	1.44228	1.42874	1.39224	1.39458	1.38272	1.3952	1.40791	1.388	1.37229	1.31533	1.2949	1.30169	1.2855	1.26861	1.25227	1.21553	1.21501	1.16582	1.16051	1.15526	1.15636	1.14308	1.11556	1.10954	1.10359	1.09771	1.09188	1.08612	1.09717	1.06936	1.06526	1.02267	0.983347	0.990362	0.994197	0.998061	1.00196	1.00588	0.989315	0.973286	0.992683	0.976828	0.987261	0.997418	1.00779
0.799788	0.782175	1.35249	1.15742	1.01152	1.02804	0.799481	0.884177	0.91034	0.996944	1.03011	1.12758	0.938389	0.934597	0.959501	1.01238	1.01637	1.00488	0.987308	0.976684	0.976389	0.982129	1.01774	0.968707	0.970296	0.996781	1.02475	1.05434	1.08568	1.06643	1.17663	1.10671	1.13515	1.08165	1.09589	1.12332	1.09673	1.11155	1.12678	1.14243	1.35938	1.11949	1.13371	1.1483	1.16326	1.1323	1.15598	1.137	1.10538	1.14209
2.23681	2.18334	2.13237	2.13405	2.15913	2.29312	2.36885	2.44976	2.29767	2.16336	2.17172	1.7364	1.7911	1.93779	2.14059	2.02717	1.95118	1.9906	1.90748	2.16765	2.12224	1.93034	1.98474	1.69898	1.72267	1.74703	1.66933	1.67323	1.67716	1.6811	1.64241	1.48725	1.59796	1.48056	1.59014	1.74269	1.50258	1.64922	1.67391	1.79986	1.78265	1.77262	1.7627	1.75289	1.74319	1.7852	1.76722	1.76461	1.77609	1.83082
1.19694	1.20205	1.20196	1.16396	1.16285	1.16096	1.15367	1.14353	1.11926	1.11849	1.13314	1.12446	1.10408	1.12157	1.10796	1.11428	1.11422	1.1081	1.08264	1.09453	1.09202	1.10407	1.1164	1.10839	1.09164	1.06314	1.05301	1.09097	1.0785	1.06569	1.05319	1.06967	1.06985	1.07004	1.06495	1.0599	1.06029	1.03516	1.01329	1.07685	1.05016	1.03059	1.03857	1.0246	1.01099	0.969854	0.975056	0.980313	0.962403	0.945135
1.6387	1.63535	1.59052	1.57235	1.58551	1.58186	1.58136	1.56436	1.58137	1.56424	1.59037	1.57862	1.57197	1.59867	1.58875	1.57895	1.53934	1.53192	1.5072	1.53003	1.55442	1.53916	1.54969	1.56036	1.5769	1.58848	1.60023	1.6079	1.61761	1.57797	1.54022	1.50424	1.46497	1.4277	1.39228	1.35857	1.32646	1.35408	1.38287	1.41598	1.45072	1.44719	1.42671	1.4068	1.44728	1.37463	1.37356	1.30905	1.27823	1.28524
1.96637	1.96652	2.11099	2.09135	2.05983	2.07058	2.06123	1.98157	1.9523	1.92133	1.98236	1.88932	1.85927	1.91463	1.84764	1.85217	1.81691	1.78924	1.76239	1.75639	1.75043	1.74451	1.68872	1.64403	1.68818	1.69179	1.69541	1.67805	1.66104	1.60571	1.62944	1.60986	1.59075	1.63221	1.60683	2.02961	1.41548	1.47414	1.53787	1.53287	1.52791	1.52298	1.53785	1.5136	1.49956	1.50166	1.50376	1.45142	1.43708	1.42303
1.4346	1.40538	1.39724	1.36789	1.33974	1.33584	1.31227	1.2907	1.32268	1.28174	1.29408	1.2927	1.27473	1.28077	1.27361	1.2668	1.26006	1.25925	1.22628	1.22381	1.22649	1.22483	1.21773	1.21469	1.21604	1.20686	1.21279	1.20561	1.20846	1.19802	1.23761	1.19482	1.20687	1.22755	1.25966	1.2935	1.18499	1.25844	1.2037	1.22382	1.24463	1.26615	1.28843	1.25626	1.24082	1.22575	1.24091	1.24259	1.24427	1.24596
1.61658	1.62321	1.67961	1.55504	1.54959	1.54418	1.5388	1.51936	1.47126	1.42611	1.45486	1.39661	1.40853	1.42066	1.38412	1.40548	1.42751	1.38563	1.38015	1.37855	1.36188	1.34561	1.31257	1.27446	1.29093	1.30783	1.31257	1.31735	1.32216	1.30797	1.32899	1.26219	1.35358	1.31292	1.27463	1.40992	1.16872	1.18229	1.19617	1.21038	1.22579	1.2416	1.25782	1.27447	1.22009	1.24011	1.26079	1.19966	1.18397	1.16868
1.76542	1.7811	1.81244	1.8449	1.87854	1.95201	1.87391	1.80181	1.73106	1.79038	1.81205	1.80569	1.82661	1.84801	1.86992	1.89236	1.91534	1.93093	1.94678	2.00473	2.04829	2.09378	1.98137	1.99389	1.94611	1.73938	1.71276	1.68693	1.61435	1.65949	1.67181	1.68432	1.706	1.72825	1.93023	1.84689	1.90265	1.89425	1.88592	1.80438	1.92076	1.81989	1.73446	1.65669	1.65789	1.65909	1.76845	1.74774	1.7275	1.70773
1.53434	1.51054	1.53655	1.53363	1.50574	1.53234	1.51673	1.51377	1.55587	1.51502	1.5294	1.47821	1.48133	1.50017	1.49556	1.51444	1.55405	1.49109	1.51977	1.47264	1.46372	1.48322	1.46795	1.50594	1.49078	1.4656	1.46573	1.46465	1.49895	1.47568	1.47507	1.47447	1.46475	1.42482	1.45899	1.38265	1.31391	1.41814	1.38578	1.40085	1.41162	1.40727	1.40547	1.40368	1.38701	1.38652	1.38354	1.41024	1.38304	1.38034
0.867814	0.85992	0.87422	0.862686	0.878708	0.861404	0.868567	0.880873	0.877388	0.900894	0.925985	0.888262	0.873717	0.889566	0.891255	0.896061	0.900919	0.914842	0.937378	0.961053	0.950306	0.928998	0.936875	0.944886	0.923045	0.898209	0.965859	0.937109	0.943686	0.976445	1.01156	0.973846	1.00713	1.02699	1.03772	1.04868	1.06628	1.08449	1.10332	1.12283	1.17205	1.2045	1.19224	1.18022	1.16952	1.15901	1.19284	1.11704	1.11436	1.1401
1.64429	1.54284	1.58096	1.58477	1.57018	1.55464	1.52117	1.56081	1.50782	1.50403	1.50176	1.52523	1.50928	1.51166	1.51405	1.5419	1.57079	1.5758	1.58566	1.5379	1.53963	1.45685	1.51248	1.46613	1.48972	1.47743	1.43589	1.46085	1.47276	1.43292	1.45064	1.44425	1.43655	1.42894	1.42141	1.39946	1.37818	1.34717	1.31753	1.33681	1.31643	1.29667	1.28226	1.26817	1.25438	1.25963	1.26493	1.27028	1.27567	1.2811
2.06916	1.99882	1.89879	1.96539	2.00344	1.95701	1.89451	1.96964	1.95395	1.93851	1.92331	1.90834	1.88863	1.81013	1.85419	1.80956	1.77058	1.75998	1.74951	1.73915	1.70462	1.64628	1.67996	1.71505	1.6522	1.61484	1.57914	1.59147	1.53311	1.53788	1.54268	1.54751	1.52386	1.53163	1.55196	1.67875	1.51302	1.58607	1.59535	1.60621	1.63383	1.60529	1.60737	1.63501	1.57891	1.58628	1.60749	1.63929	1.66366	1.61856
1.88913	1.93275	1.85567	1.84255	1.7965	1.77551	1.75699	1.78704	1.77508	1.79204	1.70718	1.65162	1.63822	1.66679	1.63932	1.67726	1.6663	1.67646	1.68675	1.69716	1.70048	1.63461	1.62501	1.54885	1.53441	1.52024	1.47789	1.50725	1.49138	1.53047	1.55272	1.50788	1.46557	1.52628	1.53966	1.53464	1.52966	1.56564	1.54952	1.60764	1.57918	1.61804	1.59634	1.57521	1.55463	1.53459	1.52213	1.45951	1.47292	1.48658
1.1009	1.13595	1.10568	1.09631	1.12742	1.09392	1.07043	1.06795	1.06548	1.09416	1.06077	1.09322	1.09522	1.0629	1.12544	1.11138	1.48873	1.42761	1.20509	1.16665	1.13058	1.14669	1.15623	1.15673	1.17685	1.16923	1.18193	1.19389	1.2041	1.20881	1.21355	1.21832	1.25709	1.2984	1.41455	1.56335	1.34353	1.40102	1.46365	1.497	1.46928	1.43731	1.42184	1.40671	1.36395	1.33232	1.30212	1.28021	1.25929	1.2846
1.33347	1.35461	1.37643	1.38083	1.38526	1.28658	1.27266	1.25904	1.23346	1.2089	1.21164	1.2144	1.21717	1.21995	1.22275	1.20702	1.19169	1.17674	1.16216	1.32954	1.3294	1.32926	1.38122	1.44135	1.41924	1.4663	1.46299	1.45969	1.45641	1.48591	1.47125	1.45689	1.4428	1.46438	1.47003	1.63211	1.53764	1.4535	1.48487	1.44909	1.47316	1.43493	1.43148	1.42804	1.38162	1.33811	1.32911	1.33733	1.34565	1.35408
1.39705	1.37109	1.3951	1.35601	1.33177	1.33699	1.36688	1.29897	1.3818	1.33014	1.35152	1.35554	1.3465	1.25326	1.38694	1.39042	1.38279	1.32316	1.35377	1.2951	1.26408	1.28181	1.2419	1.20704	1.20461	1.18334	1.164	1.22713	1.22286	1.18942	1.16678	1.18294	1.1256	1.23737	1.29395	1.29825	1.23166	1.24242	1.23039	1.21859	1.0937	1.10456	1.11563	1.12693	1.16453	1.08295	1.04997	1.09728	1.04487	0.997243
																																						1.48528	1.56704	1.52008	1.47584	1.5144	1.55502	1.59789	1.60825	1.61875	1.63496	1.65149	1.66142
0.735819	0.801288	0.813994	0.793246	0.844552	0.836647	0.844361	0.888379	0.87664	0.848154	0.872345	0.87678	0.908086	0.918051	0.901486	0.934334	0.930092	0.912389	0.942126	0.86239	0.720855	0.686384	0.724016	0.69493	0.709877	0.870502	0.496889	0.347671	0.370434	0.396386	0.426248	0.37456	0.384575	0.395139	0.406301	0.418112	0.447057	0.480307	0.518901	0.564239	0.618259	0.683717	0.758101	0.80122	0.917599	0.85694	0.919088	0.953086	0.943402	0.997266
1.33333	1.32297	1.32699	1.3343	1.28677	1.28434	1.28192	1.2795	1.22018	1.23165	1.25252	1.23032	1.22024	1.21031	1.18538	1.27905	1.16024	1.23631	1.23774	1.32636	1.26855	1.2763	1.21992	1.32735	1.29208	1.26856	1.31268	1.38295	1.28012	1.33581	1.25902	1.30908	1.28388	1.37148	1.4719	1.50634	1.37096	1.41727	1.46682	1.43809	1.42866	1.41982	1.44889	1.40964	1.40845	1.40727	1.39775	1.38973	1.3818	1.41622
1.09546	1.10911	1.14333	1.13342	1.18003	1.18603	1.18336	1.23764	1.28441	1.33225	1.28179	1.30621	1.31367	1.27728	1.36255	1.39208	1.35646	1.39075	1.38581	1.3809	1.4518	1.43991	1.47423	1.46442	1.43219	1.48241	1.48413	1.46424	1.42361	1.37617	1.38965	1.43337	1.44511	1.43411	1.40998	1.49483	1.26346	1.28054	1.2981	1.3322	1.36145	1.34746	1.3225	1.24663	1.22081	1.25416	1.24466	1.11696	1.22333	1.15534
1.20028	1.20551	1.19276	1.23783	1.21782	1.23089	1.25562	1.20938	1.21457	1.13302	1.20869	1.21038	1.18109	1.21301	1.21783	1.19155	1.18761	1.1592	1.11799	1.12893	1.16277	1.16743	1.18151	1.14727	1.19494	1.20482	1.1706	1.24412	1.18115	1.19107	1.14126	1.20908	1.26072	1.30889	1.30067	1.39027	1.2565	1.32352	1.26713	1.24643	1.22147	1.2506	1.23549	1.2428	1.2502	1.25769	1.26527	1.27294	1.2807	1.1995
0.801361	0.694063	0.808744	0.730901	0.765377	0.803268	0.845105	0.89154	0.889356	0.933463	0.872932	0.819773	0.994811	0.980504	0.97502	1.07342	1.0116	1.07018	1.15887	1.12566	1.0943	0.986024	1.11128	0.967154	0.894087	1.08962	1.0733	1.07674	1.0802	1.08369	1.02729	0.976468	1.036	1.10326	1.12885	1.15566	1.18378	1.19786	1.21228	1.22706	1.18794	1.06424	1.06733	1.09437	1.12281	1.12006	1.11731	1.11458	1.00655	1.08045
1.76213	1.79995	1.79381	1.74332	1.78673	1.71944	1.60363	1.67482	1.6046	1.55997	1.54292	1.61053	1.58943	1.57537	1.56156	1.56034	1.55913	1.45369	1.53362	1.51345	1.4938	1.45318	1.4008	1.3553	1.31266	1.3479	1.38508	1.36991	1.32688	1.34873	1.37131	1.4021	1.47307	1.42795	1.59772	1.73345	1.41171	1.49802	1.39181	1.46509	1.50927	1.54404	1.58044	1.6186	1.58569	1.55408	1.56773	1.5356	1.51617	1.49722
1.38713	1.36327	1.32951	1.28857	1.30284	1.33407	1.33952	1.33516	1.35771	1.38103	1.35587	1.39248	1.37477	1.3575	1.35923	1.33715	1.31577	1.33185	1.34833	1.39551	1.38409	1.38416	1.39562	1.38686	1.37821	1.36966	1.37235	1.37505	1.37777	1.29533	1.29289	1.35596	1.38602	1.38117	1.37635	1.37157	1.36682	1.3621	1.38257	1.40367	1.42542	1.44786	1.45792	1.46812	1.47847	1.48896	1.49961	1.5104	1.52136	1.53247
0.9956	0.963946	1.00258	0.991796	0.981245	0.972569	0.948273	1.00062	0.975823	0.980587	0.985398	0.990256	0.980619	0.99568	1.01121	0.987782	0.988083	1.03872	1.00865	0.994161	1.01709	1.07396	1.00108	1.02461	1.04927	1.0132	1.10265	1.03518	1.03364	1.03211	1.03629	1.00837	0.98192	0.988993	0.962367	0.937138	0.913198	0.935201	0.964008	1.01781	1.00318	0.990428	0.977996	1.01332	0.995228	1.00237	0.995606	1.05119	1.02824	1.03032
																																0.701059	0.704093	0.707152	0.710238	0.713351	0.716492	0.71966	0.722857	0.732097	0.741576	0.751303	0.76129	0.771545	0.782081	0.792908	0.821763	0.827583	0.833487
	1.36521	1.37056	1.31218	1.33425	1.36558	1.30595	1.29408	1.33142	1.29642	1.27157	1.34896	1.28324	1.34145	1.32247	1.31114	1.33526	1.32071	1.37135	1.31331	1.32844	1.36116	1.30042	1.323	1.26942	1.27851	1.27799	1.27687	1.2986	1.32109	1.44577	1.37024	1.41018	1.43234	2.40976	7.58716	1.21549	1.44981	1.49951	1.39847	1.42994	1.42994	1.42995	1.4455	1.43456	1.4852	1.45547	1.46907	1.43298	1.55403
	0.936814	0.973921	1.01409	1.05771	1.05346	1.04528	1.08527	1.06724	1.0498	1.08302	1.11842	1.06738	1.09609	1.13613	1.08735	1.08705	1.10598	1.11543	1.04704	1.09298	1.08578	1.07867	1.08044	1.06857	1.08117	1.07226	1.08883	1.10593	1.07326	1.08533	1.07822	1.05458	1.02906	1.03078	1.06398	1.06722	1.06355	1.10513	1.14019	1.13916	1.1204	1.10224	1.08466	1.06763	1.08034	1.07619	1.06287	1.04987	1.03719
	1.29449	1.23571	1.25035	1.18106	1.28498	1.29434	1.22888	1.17982	1.2845	1.18566	1.22221	1.26108	1.30251	1.34675	1.23875	1.29023	1.34618	1.4072	1.47401	1.48328	1.48996	1.48903	1.4881	1.47011	1.45531	1.44081	1.50773	1.53737	1.51173	1.48693	1.46293	1.51528	1.51138	1.50749	1.49283	1.28923	1.42655	1.30757	1.38113	1.5199	1.61077	1.56485	1.52147	1.48043	1.57207	1.49428	1.42382	1.3597	1.30112
	0.945509	0.981131	1.01954	1.06108	1.07887	1.09727	1.05316	1.22924	1.47603	1.84679	2.29072	2.33416	2.53849	2.92718	2.49384	2.41873	2.44649	3.30542	3.51917	3.63461	3.10161	2.91514	3.19082	3.2104	2.91081	3.17072	3.28324	3.40404	3.18636	2.99486	2.82507	2.76398	2.70549	2.64153	3.63175	1.75374	2.02232	1.90148	1.72192	1.57334	1.67324	1.78668	1.83478	1.88555	1.53855	1.47624	1.41877	1.58509	1.52066
	1.63236	1.6417	1.6348	1.57399	1.60197	1.61128	1.7305	1.63391	1.63455	1.62898	1.60048	1.58698	1.61459	1.63084	1.64741	1.62724	1.60596	1.64161	1.61927	1.58763	1.61019	1.58377	1.58289	1.53962	1.56439	1.55157	1.54324	1.58993	1.56268	1.57753	1.60645	1.66155	1.57116	1.56401	2.11307	1.39684	1.51488	1.51898	1.54875	1.58316	1.56779	1.53712	1.56284	1.58943	1.61685	1.50878	1.61243	1.48782	1.48672
	1.45707	1.45926	1.46146	1.4757	1.43445	1.42856	1.42273	1.41694	1.40797	1.39911	1.39036	1.38172	1.36378	1.35802	1.37104	1.38432	1.36796	1.38751	1.38581	1.38412	1.38174	1.38555	1.41764	1.45124	1.41808	1.42485	1.43107	1.43735	1.44368	1.45528	1.44434	1.43356	1.43791	1.44229	1.45143	1.46068	1.47005	1.4629	1.46284	1.4447	1.42701	1.43396	1.44099	1.49656	1.42456	1.43099	1.43747	1.44401	1.45061
		1.22628	1.2057	1.49458	2.37524	2.42728	2.48165	2.5385	2.8474	3.20942	3.22104	4.08079	4.33917	4.63248	4.53691	4.16154	3.22291	2.62977	2.22102	1.92224	3.37282	0.962799	2.64859	2.52527	2.51922	2.5132	2.50721	3.13746	4.75239	3.86204	3.25266	2.80938	3.48166	3.69628	13.1246	2.33689	3.66286	3.73566	3.81142	4.79296	3.93402	3.33615	3.64082	3.22594	2.62375	3.00935	1.85796	3.00331	2.64784
		1.38067	1.37495	1.41277	1.39941	1.3863	1.39191	1.39756	1.40326	1.396	1.42475	1.45471	1.43835	1.42235	1.44261	1.44169	1.46713	1.46095	1.45483	1.46422	1.51189	1.51416	1.50806	1.502	1.55791	1.54228	1.5516	1.53915	1.55028	1.55937	1.56375	1.56816	1.62497	1.65351	1.91009	1.50324	1.55072	1.6013	1.65529	1.66608	1.68844	1.71142	1.69576	1.64742	1.65591	1.58307	1.56842	1.55403	1.53991
																																																1.25658	1.23177
																																							1.3429	1.35633	1.37004	1.41035	1.43738	1.39613	1.40908	1.42226	1.36974	1.35931	1.35398
												1.83289	1.71633	1.61371	1.09167	1.14894	1.21255	1.28361	1.36353	1.45406	1.55746	1.67669	1.71364	1.714	1.73085	1.74803	1.76556	1.93486	1.76737	1.67692	1.75518	1.73104	1.73002	1.79908	2.07357	1.54733	1.72295	1.63446	1.68935	1.65516	1.62234	1.58922	1.62614	1.66483	1.66998	1.72722	1.57859	1.58864	1.59883
						0.614722	0.62716	0.766208	0.783692	0.801992	0.821168	0.841282	0.831281	0.869258	0.902642	0.881327	0.890867	0.930742	0.920374	0.93902	0.92306	0.922389	0.939266	0.949651	1.00579	1.0129	1.02011	0.958832	0.993112	1.13158	1.03369	1.04412	1.00353	1.04944	1.09976	1.03982	1.10836	1.18657	1.27331	1.25363	1.23455	1.17616	1.20947	1.18031	1.12227	1.05762	1.04646	1.1347	1.13641
							1.52862	1.53114	1.53366	1.53619	1.53873	1.54128	1.56759	1.54767	1.58377	1.48864	1.51414	1.50921	1.50232	1.5273	1.5368	1.52363	1.51373	1.49222	1.56661	1.58286	1.60838	1.58511	1.60924	1.62691	1.60005	1.61328	1.61671	1.6224	1.74159	1.52039	1.58087	1.54735	1.54752	1.55979	1.55237	1.54054	1.52004	1.53856	1.53497	1.51671	1.51843	1.55976	1.5278
								0.869401	0.874358	0.872634	0.863157	0.853884	0.845057	0.836411	0.827939	0.819638	0.796629	0.810274	0.826462	0.801711	0.809704	0.843181	0.879546	0.919188	0.931619	0.94439	0.957517	1.01594	1.0168	1.01766	1.01851	1.01937	1.00246	0.986095	0.970346	0.955092	0.940311	1.00142	0.963856	0.982877	1.00266	0.994603	0.986671	0.978864	1.00005	0.988408	0.977034	0.961776	0.909072
																		1.54959	1.55547	1.67663	1.81827	1.73552	1.77686	1.89489	1.91028	1.92592	1.91063	1.89558	1.87643	1.83734	1.88968	1.84162	1.94306	1.87914	2.28591	1.84222	1.92899	2.07699	1.83629	1.99359	2.01377	1.90791	1.90701	1.78459	1.73008	1.70173	1.65944	1.57735	1.54861
																							1.48743	1.4653	1.46778	1.47027	1.47277	1.47528	1.4778	1.48032	1.48286	1.82131	1.76822	1.8314	1.89925	1.97233	2.05125	2.23974	2.31319	2.41704	2.46561	2.25994	2.30271	2.35955	2.41927	2.48208	2.31433	2.36295	2.20413
																														1.24157	1.20461	1.1698	1.13694	1.10587	1.07646	1.0418	1.06561	1.09901	1.13456	1.06716	1.13716	1.02286	1.0531	1.08517	1.06697	1.09298	1.12029	1.12847	1.13677
																																									1.65411	1.63017	1.60691	1.64505	1.60361	1.6265	1.67801	1.63089	1.63915
																																														1.56964	1.62726	1.65154	1.67655
Tx dose: 50ng INS
1.19866	1.20959	1.16719	1.17789	1.22206	1.24469	1.23795	1.1942	1.20371	1.18776	1.19657	1.2431	1.23418	1.21703	1.20552	1.20398	1.20138	1.203	1.24385	1.21453	1.20365	1.17589	1.22809	1.18745	1.20604	1.19101	1.18073	1.17199	1.1274	1.14658	1.16004	1.16343	1.13438	1.16428	1.12332	1.21963	1.07382	1.13214	1.11932	1.12867	1.14124	1.21128	1.23692	1.24424	1.24594	1.24468	1.23393	1.22337	1.22798	1.22006
1.36366	1.31045	1.29881	1.28618	1.28464	1.23183	1.25105	1.20331	1.2193	1.17961	1.17241	1.18401	1.14321	1.14726	1.12477	1.12405	1.1576	1.12407	1.12274	1.10365	1.10766	1.08725	1.03721	1.02345	1.04702	1.07132	1.07224	1.08007	1.06221	1.10023	1.14413	1.15152	1.159	1.15959	1.18662	1.2341	1.09032	1.16841	1.16393	1.0957	1.16656	1.24279	1.23452	1.21958	1.23194	1.27564	1.31696	1.356	1.38651	1.41841
1.14355	1.15498	1.18265	1.18599	1.22992	1.19627	1.20898	1.25449	1.28027	1.24847	1.24026	1.20307	1.19423	1.17247	1.17804	1.18434	1.19071	1.20947	1.18529	1.22692	1.27732	1.31728	1.35981	1.42187	1.41178	1.4349	1.43487	1.43785	1.40616	1.46026	1.46646	1.49592	1.45502	1.48176	1.50849	1.62034	1.46915	1.58003	1.59316	1.62731	1.62926	1.64075	1.60848	1.68915	1.6679	1.67896	1.62916	1.61282	1.65499	1.73105
1.50498	1.46255	1.49906	1.44213	1.42276	1.4618	1.44846	1.48977	1.50985	1.582	1.53272	1.5658	1.58331	1.60014	1.59292	1.70515	1.58544	1.91215	1.64275	1.58267	1.54973	1.62025	1.54408	1.60707	1.58166	1.59564	1.69521	1.69106	1.72317	1.71615	1.70818	1.7337	1.67337	1.69496	1.54801	2.31096	1.43778	1.64525	1.62356	1.60242	1.57854	1.5875	1.63213	1.75805	1.6663	1.72048	1.77042	1.8459	1.92842	1.92028
1.62201	1.64591	1.6583	1.68191	1.69755	1.69194	1.75325	1.75658	1.75991	1.7942	1.78771	1.82392	1.83358	1.83179	1.78351	1.79007	1.79669	1.78378	1.76186	1.71967	1.72259	1.66687	1.6761	1.65142	1.62746	1.60851	1.57732	1.547	1.52269	1.55605	1.55927	1.55965	1.53463	1.51666	1.54089	1.74351	1.38655	1.42916	1.47448	1.52277	1.52779	1.57268	1.61162	1.65253	1.68094	1.6577	1.59994	1.59133	1.59469	1.58598
1.7142	1.67703	1.72576	1.665	1.66028	1.63421	1.60895	1.60646	1.57503	1.56671	1.65807	1.56051	1.57998	1.58877	1.54492	1.59423	1.57951	1.6513	1.62738	1.59506	1.58511	1.57786	1.56974	1.5848	1.54557	1.59818	1.59709	1.59478	1.53382	1.55189	1.56766	1.58375	1.58107	1.51356	1.61839	1.75569	1.49758	1.61406	1.59248	1.62203	1.66818	1.71957	1.70301	1.70491	1.7725	1.80435	1.78396	1.75561	1.8018	1.83877
1.31056	1.27948	1.3281	1.33945	1.30858	1.32062	1.3443	1.34383	1.35739	1.40153	1.39704	1.38077	1.355	1.38494	1.36921	1.35635	1.327	1.37378	1.34976	1.34775	1.40821	1.38903	1.41299	1.40568	1.38686	1.40811	1.40052	1.39634	1.31515	1.34147	1.34887	1.41276	1.47369	1.52978	1.49064	1.59634	1.50126	1.44844	1.50272	1.45743	1.50119	1.49053	1.54399	1.55292	1.56194	1.64345	1.63236	1.66842	1.70895	1.83771
1.20808	1.15744	1.19599	1.17149	1.14084	1.1646	1.14302	1.12808	1.1494	1.14209	1.18774	1.11528	1.17243	1.215	1.15859	1.21552	1.24442	1.23032	1.21655	1.23026	1.16795	1.20266	1.25442	1.27352	1.29462	1.31644	1.29645	1.31235	1.31176	1.33571	1.36056	1.3495	1.31733	1.40611	1.38187	1.71585	1.26434	1.41552	1.43927	1.48967	1.45626	1.52992	1.628	1.56848	1.62111	1.64027	1.65989	1.5819	1.59514	1.5881
1.37891	1.34748	1.35804	1.3117	1.34554	1.32433	1.31044	1.35203	1.28484	1.32273	1.27287	1.29129	1.27057	1.26779	1.24336	1.21985	1.23403	1.27304	1.24958	1.24673	1.28107	1.27391	1.2533	1.24766	1.27221	1.24785	1.2354	1.22961	1.24876	1.26852	1.30023	1.33154	1.30641	1.28881	1.26225	1.26053	1.16966	1.21179	1.20181	1.20657	1.26408	1.31905	1.38306	1.39775	1.3686	1.32906	1.34457	1.28353	1.28387	1.32564
1.10775	1.1085	1.1104	1.11785	1.1049	1.09907	1.10431	1.10296	1.08855	1.11068	1.11389	1.1249	1.13602	1.13152	1.13333	1.14168	1.14052	1.14538	1.1317	1.16234	1.1769	1.1592	1.18892	1.19318	1.1891	1.18409	1.19665	1.20134	1.20684	1.21024	1.22048	1.21511	1.26369	1.27748	1.28139	1.3228	1.25945	1.26479	1.27435	1.27428	1.28973	1.3163	1.3284	1.33752	1.34813	1.35315	1.36844	1.38818	1.41415	1.40572
1.22177	1.20237	1.21022	1.20951	1.16752	1.15773	1.14413	1.13213	1.13984	1.13434	1.13952	1.11851	1.1285	1.15733	1.15734	1.1686	1.14904	1.09047	1.1109	1.10911	1.08942	1.07041	1.05206	1.06635	1.08587	1.09947	1.11099	1.12007	1.12706	1.1409	1.11148	1.13689	1.14036	1.19319	1.25116	1.28843	1.2409	1.2428	1.27959	1.24388	1.31318	1.40901	1.49302	1.54618	1.64974	1.69324	1.78896	1.73359	1.63135	1.65595
1.16141	1.1489	1.13666	1.19534	1.17677	1.16246	1.14849	1.182	1.16829	1.14751	1.17483	1.18604	1.14076	1.16377	1.18774	1.16726	1.18581	1.18244	1.21594	1.19681	1.1856	1.16443	1.11534	1.2131	1.22533	1.24989	1.21712	1.23193	1.24749	1.4851	1.20743	1.21849	1.19459	1.17796	1.20794	1.42643	1.17543	1.23503	1.29449	1.26745	1.24152	1.34637	1.39448	1.43266	1.48086	1.52584	1.53673	1.4948	1.46348	1.50107
1.75658	1.58568	1.7659	1.84772	1.54224	1.75951	1.76412	1.65411	1.68629	1.67153	1.5631	1.53754	1.44006	1.6282	1.50004	1.48997	1.54649	1.59532	1.55307	1.564	1.45933	1.41933	1.53143	1.48442	1.49449	1.52081	1.52324	1.53921	1.78053	1.65429	1.66756	1.64037	1.7003	1.63262	1.64381	2.34058	1.55696	1.63395	1.63991	1.68423	1.83374	1.82308	1.76016	1.70271	1.6912	1.79692	1.76284	1.81163	1.9942	1.87044
1.30723	1.30077	1.3111	1.307	1.31685	1.30462	1.35418	1.31985	1.37332	1.37913	1.3941	1.36975	1.40505	1.37226	1.39297	1.3924	1.3828	1.37752	1.35965	1.37122	1.34167	1.3057	1.31044	1.37513	1.40999	1.38619	1.3784	1.38842	1.40076	1.45385	1.46031	1.46647	1.55096	1.61696	1.59927	1.87751	1.46249	1.60186	1.61059	1.61408	1.60446	1.7164	1.71382	1.76451	1.82751	1.86264	1.86455	1.84929	1.89103	1.93714
0.833266	0.85195	0.847335	0.869844	0.868104	0.853356	0.861421	0.881313	0.883455	0.871889	0.842564	0.836638	0.85144	0.851874	0.836575	0.84263	0.86807	0.85055	0.84684	0.870038	0.88014	0.884584	0.871697	0.858611	0.885147	0.896298	0.883918	0.877637	0.904552	0.902801	0.901057	0.884715	0.873729	0.865446	0.848117	0.771916	0.893612	0.851163	0.858596	0.861968	0.924596	0.95932	1.05369	1.08881	1.13253	1.12588	1.12167	1.11421	1.10685	1.09959
0.927086	1.0104	0.980783	1.02674	1.07722	1.40422	2.01629	3.57421	2.91911	3.20805	2.65719	3.05135	3.77924	2.56299	2.84962	2.68332	2.56195	2.76366	2.95279	3.0946	2.97009	2.83181	2.99221	2.75619	2.80138	2.84807	2.67772	2.82238	3.57992	3.1538	3.15081	3.13711	3.17814	3.29894	3.20369	3.91284	2.12548	2.90714	2.36272	2.86233	2.72704	2.39467	2.41591	3.05216	2.33836	2.25414	2.15259	1.8198	1.937	2.86478
1.01651	0.985204	0.95248	0.940775	0.918618	0.915003	0.911415	0.907388	0.919585	0.932063	0.92592	0.937842	0.929374	0.927873	0.926931	0.932446	0.90742	0.915215	0.913192	0.886202	0.884195	0.901598	0.897438	0.921158	0.898901	0.894244	0.889179	0.897228	0.898468	0.899711	0.892567	0.894341	0.877724	0.885894	0.909575	0.940182	0.954562	0.914109	0.943536	0.941071	1.00124	1.09042	1.16228	1.19388	1.17536	1.15563	1.09936	1.04806	1.05262	1.06654
1.89416	1.75803	1.6551	1.60594	1.65964	1.614	1.57081	1.52986	1.50777	1.47798	1.50812	1.49601	1.65984	1.62976	1.53424	1.63477	1.62473	1.61686	1.66569	1.66002	1.74953	1.73987	1.74089	1.75491	1.75322	1.80498	1.85699	1.75085	1.85042	1.98681	1.94623	1.99941	2.01198	1.81882	1.6595	3.12046	1.45175	1.7609	1.79564	1.91593	1.98503	2.05931	1.95062	1.97344	1.98115	2.0696	2.10094	2.08634	2.10413	2.07283
1.30802	1.32474	1.27727	1.29321	1.30098	1.26944	1.31256	1.31905	1.27687	1.32653	1.36725	1.35522	1.29917	1.32595	1.28276	1.29164	1.36042	1.33385	1.31844	1.26041	1.41013	1.3573	1.66742	2.08816	1.3821	1.39239	1.39007	1.39061	1.44652	1.44664	1.42687	1.41111	1.39569	1.40075	1.37672	1.6299	1.23474	1.30293	1.31803	1.39172	1.48641	1.56052	1.64241	1.71864	1.73899	1.71916	1.66375	1.66914	1.67456	1.59746
1.16391	1.14795	1.12862	1.13747	1.15534	1.14597	1.15485	1.16387	1.16843	1.16526	1.1282	1.17008	1.2129	1.19686	1.20655	1.22234	1.21532	1.22124	1.22911	1.23214	1.24248	1.26697	1.29524	1.31695	1.27268	1.33329	1.33943	1.34623	1.36111	1.37632	1.38345	1.39556	1.42826	1.44109	1.45627	1.5358	1.4585	1.49529	1.49472	1.52714	1.56794	1.62618	1.64617	1.65125	1.62204	1.60034	1.57922	1.58724	1.66299	1.56266
0.977179	0.957069	0.967037	0.958919	0.978137	0.969349	1.01332	0.972567	0.995777	0.996976	1.03633	1.05131	1.07028	1.08346	1.08789	1.10017	1.08602	1.04635	1.00569	1.00022	1.02482	1.01924	1.02199	1.00941	0.997059	0.98422	1.00146	1.03121	1.07524	1.12432	1.18485	1.14125	1.14698	1.09443	1.04023	0.967996	0.950099	0.997375	1.0496	1.11502	1.20552	1.25111	1.31289	1.30486	1.3702	1.44242	1.45663	1.43852	1.40584	1.40501
1.3161	1.31169	1.31177	1.34309	1.33788	1.34815	1.32182	1.33717	1.36158	1.40442	1.41456	1.41033	1.39061	1.43044	1.42711	1.48115	1.49873	1.41612	1.51373	1.40166	1.40321	1.38086	1.43362	1.41185	1.43628	1.39059	1.34771	1.37253	1.40251	1.4455	1.47489	1.47213	1.50787	1.53411	1.47852	1.81249	1.36024	1.48692	1.46721	1.44977	1.45058	1.46342	1.5322	1.55381	1.68967	1.77	1.87161	1.94067	2.01269	2.13889
1.30006	1.27423	1.2413	1.24244	1.26383	1.22256	1.25149	1.22117	1.26178	1.18775	1.23297	1.18524	1.21462	1.21521	1.21237	1.23545	1.23321	1.24089	1.2647	1.27296	1.28133	1.30505	1.35561	1.29944	1.31268	1.33505	1.30486	1.27189	1.26572	1.27421	1.29371	1.26533	1.23497	1.2062	1.28925	1.36183	1.31739	1.42465	1.56657	1.64087	1.73265	1.80542	1.81531	1.84317	1.8251	1.82173	1.82193	1.87379	1.83887	1.84876
1.23118	1.2139	1.24331	1.24549	1.2933	1.27482	1.24494	1.21317	1.22267	1.23213	1.23427	1.18439	1.16346	1.1934	1.19465	1.18159	1.17623	1.17777	1.15949	1.21324	1.19165	1.20475	1.19281	1.20812	1.23819	1.23335	1.22359	1.23628	1.20794	1.24485	1.25307	1.2249	1.29063	1.25882	1.29722	1.38584	1.24223	1.33595	1.39095	1.35769	1.36494	1.40846	1.44539	1.47387	1.47858	1.49179	1.54249	1.49112	1.42912	1.50929
1.75048	1.78925	1.72172	1.7198	1.74791	1.66349	1.69831	1.6851	1.65486	1.68235	1.7056	1.7295	1.71781	1.72667	1.71965	1.72903	1.73146	1.74523	1.74947	1.78912	1.7699	1.73562	1.79368	1.7971	1.80054	1.81555	1.84431	1.7862	1.83316	1.89323	1.94836	2.05087	2.05882	2.01087	1.91849	1.97404	1.76544	1.85175	1.8806	1.82799	1.91446	2.02707	2.0352	2.09628	2.18629	2.27959	2.34781	2.42025	2.44803	2.50005
1.24952	1.30456	1.30422	1.35167	1.38114	1.38936	1.36912	1.37297	1.40098	1.36165	1.37315	1.38485	1.36796	1.34804	1.351	1.3209	1.30826	1.31642	1.32469	1.29948	1.29111	1.33992	1.31775	1.37724	1.29586	1.27337	1.37046	1.27323	1.3476	1.33814	1.32981	1.36755	1.32988	1.36473	1.32472	1.81778	1.23336	1.4008	1.45279	1.43571	1.43043	1.46292	1.49691	1.45215	1.57119	1.47726	1.47555	1.49909	1.5234	1.50018
1.52237	1.53374	1.54529	1.53074	1.539	1.56826	1.60848	1.61711	1.54184	1.6165	1.68679	1.58385	1.60636	1.57772	1.60347	1.63008	1.55759	1.58204	1.61254	1.60409	1.5979	1.61235	1.66	1.66932	1.64631	1.64542	1.66878	1.69066	1.65819	1.74326	1.79811	1.8333	1.86904	1.82614	1.73197	3.35547	1.52861	1.87545	1.79098	1.71379	1.80471	1.83778	1.79319	1.81679	1.91664	1.81686	1.93839	1.91435	1.92806	1.8427
1.55294	1.42793	1.32154	1.9766	3.91936	3.25922	2.06998	3.00139	2.14356	3.5867	2.70244	2.64205	4.42465	3.33508	5.0337	4.24141	4.5065	4.27019	4.39008	4.73368	4.24249	4.23099	3.5771	3.81636	4.73907	3.40003	3.79123	4.95343	5.97362	4.54459	4.70105	4.86867	4.86307	4.85749	6.16366	13.3143	3.8158	4.56701	5.70726	5.56928	6.7187	7.56122	7.84956	8.16076	8.47087	9.24646	9.23983	8.8617	9.12396	8.79157
1.32699	1.26261	1.23888	1.24653	1.20804	1.21253	1.20972	1.19542	1.27848	1.25221	1.23017	1.25607	1.25187	1.24816	1.26862	1.29611	1.26464	1.29061	1.31279	1.33563	1.30694	1.29182	1.33365	1.35401	1.35453	1.40754	1.44475	1.44899	0.826967	0.957241	1.03674	1.07254	1.09717	1.09075	1.10964	1.17289	1.12012	1.45104	1.5447	1.61191	1.72879	1.60779	1.68557	1.56713	1.63184	1.62609	1.59515	1.60083	1.59462	1.58846
1.27393	1.26511	1.24185	1.24786	1.26506	1.27618	1.2875	1.27324	1.29147	1.2867	1.23864	1.21216	1.16709	1.1466	1.15838	1.17578	1.14292	1.18687	1.15069	1.21611	1.21459	1.18514	1.20149	1.23437	1.29081	1.31456	1.31662	1.33841	1.31873	1.37239	1.37336	1.40102	1.45631	1.46741	1.53739	1.77473	1.45576	1.60083	1.64398	1.6064	1.67466	1.69079	1.69996	1.67607	1.70205	1.71628	1.78514	1.7796	1.8227	1.81676
1.30055	1.25164	1.24877	1.17645	1.19252	1.19409	1.06676	1.11083	1.05619	1.0395	1.0286	1.0586	1.05467	1.07468	1.00743	1.03256	1.03012	1.07839	1.06878	1.05839	1.0308	1.04701	1.06373	1.081	1.09883	1.11727	1.08686	1.08769	1.08027	1.09201	1.10402	1.11629	1.1734	1.22496	1.21354	1.32829	1.16677	1.22633	1.25774	1.26855	1.30204	1.30266	1.28144	1.20987	1.29502	1.24578	1.27792	1.31176	1.26181	1.2895
0.767055	0.809965	0.820468	0.943284	1.05545	1.21975	1.27217	1.33146	1.29289	1.27851	1.29201	1.28763	1.29323	1.34199	1.31999	1.29531	1.28953	1.2636	1.27208	1.23125	1.25345	1.21734	1.27576	1.27195	1.27456	1.29751	1.31668	1.33541	1.34735	1.39403	1.38244	1.38108	1.40007	1.39748	1.39622	1.45569	1.29534	1.38452	1.37203	1.41828	1.48274	1.59193	1.64571	1.66753	1.65112	1.63037	1.63227	1.62911	1.61648	1.6464
																																				1.99388	2.06893	2.14986	2.23736	2.3323	3.05067	2.94971	2.71051	2.9079	2.73042	2.83986	2.71764	2.83587	2.96486
1.43055	1.45739	1.45105	1.38475	1.40094	1.45205	1.4453	1.4258	1.3726	1.4216	1.43081	1.45334	1.4384	1.45075	1.45547	1.47781	1.44171	1.40914	1.4456	1.43962	1.36961	1.42783	1.5392	1.54852	1.57697	1.59817	1.64163	1.59057	1.64695	1.65062	1.73493	1.74554	1.76236	1.81735	1.87234	2.18387	1.66657	1.84984	1.8297	1.79836	1.80818	1.87577	1.8778	1.89585	1.8144	1.74586	1.70642	1.65825	1.64427	1.64212
1.35205	1.33148	1.3182	1.33454	1.34027	1.33725	1.32894	1.32437	1.31834	1.33413	1.30356	1.31704	1.31904	1.33278	1.34755	1.33499	1.30016	1.33122	1.33833	1.35379	1.34398	1.33429	1.33276	1.32791	1.32423	1.30456	1.32695	1.31386	1.30463	1.31232	1.30909	1.33356	1.32035	1.34667	1.3359	1.38295	1.32174	1.37627	1.38391	1.37666	1.43189	1.4046	1.41162	1.45647	1.41712	1.41869	1.41411	1.40453	1.38655	1.33605
1.53295	1.52564	1.56566	1.5666	1.56634	1.58629	1.58826	1.60766	1.58663	1.58705	1.57232	1.55697	1.57587	1.58108	1.58367	1.56461	1.58685	1.53474	1.57337	1.58372	1.56087	1.57451	1.57426	1.59127	1.60865	1.5983	1.59463	1.65753	1.65848	1.65673	1.71183	1.70691	1.72463	1.74273	1.74495	2.02129	1.62466	1.70134	1.78562	1.78827	1.85162	1.9293	1.88218	1.91231	1.94401	1.91281	1.95885	1.97856	1.9275	1.92434
1.04167	1.04506	1.04085	1.10118	1.11961	1.12494	1.11206	1.11478	1.15102	1.15692	1.15923	1.21349	1.20581	1.21041	1.21492	1.22912	1.22468	1.23295	1.26417	1.26519	1.27798	1.32598	1.32076	1.31411	1.31038	1.27993	1.26588	1.25833	1.2654	1.29092	1.35551	1.42062	1.45393	1.44464	1.46752	1.65468	1.40504	1.54322	1.5501	1.60865	1.63704	1.66822	1.69919	1.70426	1.76025	1.80374	1.81998	1.79806	1.82126	1.81732
1.44341	1.4465	1.42788	1.44383	1.42177	1.43672	1.43692	1.43122	1.43726	1.4328	1.4441	1.41948	1.42473	1.43328	1.40186	1.38446	1.37951	1.34497	1.35648	1.37412	1.37692	1.38751	1.38197	1.41001	1.38909	1.39428	1.37345	1.38975	1.40211	1.41469	1.44587	1.44258	1.47458	1.52233	1.56606	1.61059	1.39386	1.35698	1.32155	1.25208	1.34011	1.44144	1.52685	1.59944	1.69369	1.75948	1.83058	1.85601	1.81178	1.78897
2.01931	2.01157	1.84492	1.744	1.83757	1.74786	1.70877	1.74703	1.834	1.82006	1.99451	2.07253	2.27261	1.52586	1.57249	1.62329	1.89948	1.86477	1.8313	1.76058	1.86712	1.98739	2.02301	1.65708	1.68225	1.69723	1.84194	1.81756	2.08282	1.99695	1.92924	1.85146	2.03011	2.24693	2.00907	1.87118	1.751	1.93756	2.11225	1.94874	2.18841	2.05282	2.20084	2.24542	2.48863	2.4541	2.40563	2.36609	2.34401	2.3898
1.30114	1.31164	1.59636	1.89586	1.36087	1.47788	1.61317	2.75365	1.4592	1.67209	1.57322	1.29037	2.48248	1.33286	2.31009	2.76523	1.85203	2.49061	1.85315	1.76562	1.29881	1.34806	1.7254	1.34953	1.32716	1.30551	1.23684	1.24712	1.28166	1.27004	1.25863	1.21732	1.28981	1.34693	1.24167	1.76357	1.30448	1.23383	1.32276	1.18154	1.74166	1.67743	1.21982	1.93192	2.53126	1.13285	1.06354	1.00222	1.10416	1.02428
2.46314	2.51648	2.08153	2.10893	1.97156	1.86332	1.8303	1.68118	1.55453	1.47837	1.51173	1.6639	1.70572	1.60451	1.6818	1.69339	1.70514	1.69561	1.62054	1.63102	1.57092	1.61657	1.59648	1.66786	1.60588	1.70406	1.70095	1.69784	1.69475	1.87738	1.66066	1.56267	1.69206	1.5821	1.57481	1.42044	1.29363	1.42378	1.58304	1.52681	1.62311	1.4704	1.68822	1.98178	1.90279	1.82986	1.79167	1.7807	1.94125	1.73202
1.65094	1.68617	1.65522	1.63596	1.6862	1.71833	1.74587	1.68322	1.61617	1.62774	1.66227	1.69653	1.68221	1.716	1.67539	1.71046	1.71818	1.75772	1.8158	1.83689	1.86601	1.83891	1.79429	1.75855	1.7517	1.78551	1.78378	1.68325	1.72899	1.69801	1.6154	1.79451	1.8187	1.79707	1.76345	2.22762	1.77562	1.95968	1.92744	1.88028	1.88562	1.93321	2.0414	2.21082	2.29628	2.21464	2.38156	2.36224	2.36292	2.45279
1.0515	1.00501	1.02345	1.04259	1.03418	1.06328	1.07952	1.09813	1.10153	1.0691	1.06795	1.05702	1.06354	1.07478	1.06933	1.06393	1.07094	1.07805	1.07791	1.05055	1.06363	1.07311	1.07001	1.06694	1.06017	1.0464	1.03298	1.04192	1.05101	1.06027	1.10407	1.14198	1.1581	1.20221	1.21378	1.26205	1.21949	1.24934	1.23887	1.22857	1.2709	1.3037	1.33824	1.39445	1.40952	1.42492	1.4608	1.46475	1.45895	1.4532
1.01116	0.908439	0.882562	0.982626	0.971107	0.959855	0.904626	0.924016	0.958851	0.929585	0.967462	0.999675	0.987716	0.967477	1.01738	0.985841	0.965972	1.02927	0.98923	0.995216	1.00128	0.980788	0.979028	0.977275	1.00208	1.00519	1.00833	1.01383	1.04775	1.08463	1.11678	1.14764	1.08568	1.17783	1.12685	1.21366	1.11153	1.1658	1.2076	1.25252	1.25015	1.25461	1.30501	1.32355	1.34264	1.35938	1.4721	1.43398	1.47346	1.51517
1.45233	1.38127	1.34943	1.32187	1.37818	1.3218	1.39506	1.31322	1.34925	1.39981	1.45237	1.50505	1.54088	1.53319	1.46896	1.45377	1.48362	1.44445	1.5234	1.46417	1.53342	1.44006	1.4268	1.41378	1.49914	1.46865	1.48912	1.51018	1.47552	1.44242	1.44911	1.44632	1.44354	1.45166	1.47233	1.37247	1.2853	1.53343	1.56671	1.56316	1.575	1.68861	1.71455	1.69867	1.68309	1.72447	1.77234	1.79895	1.82637	1.91006
0.928386	0.934496	0.937813	0.923061	0.914355	0.905811	0.877267	0.860623	0.886555	0.90895	0.875009	0.9029	0.901515	0.927498	0.923563	0.898911	0.933189	0.943703	0.946966	0.932689	0.922853	0.931625	0.885515	0.921691	0.96031	0.949334	0.923765	0.90639	0.896356	0.886542	0.87694	0.957924	0.990814	0.95502	0.956644	0.862125	0.928234	0.903773	0.929808	0.916126	1.00311	1.07369	1.09881	1.12843	1.2072	1.22949	1.25611	1.27384	1.25583	1.23832
0.864622	0.838214	0.843573	0.844083	0.844593	0.821661	0.822629	0.822119	0.785352	0.78222	0.779112	0.797504	0.773582	0.749576	0.748433	0.715693	0.735901	0.757283	0.763669	0.730904	0.700834	0.768158	0.773745	0.732214	0.760922	0.753914	0.780155	0.781546	0.772199	0.759262	0.739452	0.737222	0.714531	0.715848	0.712006	0.694018	0.716709	0.720962	0.731943	0.748488	0.702483	0.726275	0.732068	0.674985	0.670201	0.694929	0.738027	0.719255	0.792552	0.807109
1.69334	1.89492	1.19743	1.19821	1.50283	1.23845	1.03138	1.58678	1.50521	1.46843	1.4334	1.09154	1.02449	1.28487	1.50433	1.13425	1.35093	1.11735	1.55841	1.69879	1.86696	1.59457	2.04122	1.70564	1.55979	1.50589	1.05398	1.26182	0.964878	1.10381	0.933296	1.27217	0.935695	1.25197	1.21063	1.00131	1.11025	1.33665	1.06582	1.22735	1.16425	1.10733	0.86142	0.952619	1.06542	0.918185	1.23179	1.04335	1.08181	1.02461
0.890614	0.886232	0.866603	0.887331	0.879997	0.854261	0.88364	0.866704	0.88336	0.877123	0.899216	0.903014	0.875963	0.880618	0.882157	0.87093	0.859984	0.863896	0.82262	0.824618	0.809435	0.813197	0.802885	0.806474	0.806066	0.785159	0.802084	0.800356	0.807405	0.901698	0.863107	0.857013	0.864159	0.868711	0.864546	0.83227	0.846161	0.860524	0.875382	0.852881	0.879087	0.922236	0.968829	0.969381	0.96628	0.958634	0.951107	0.937927	0.952767	0.962112
1.12833	1.14178	1.07406	1.06138	1.08437	1.17417	1.07987	1.07827	1.12617	1.18353	1.22831	1.09923	1.21106	1.21998	1.19958	1.2086	1.33166	1.26621	1.24344	1.19216	1.31689	1.33501	1.36687	1.32558	1.2889	1.31637	1.25039	1.38677	1.27234	1.33949	1.48779	1.47074	1.42377	1.43352	1.42038	1.68988	1.17552	1.25713	1.42871	1.45121	1.5406	1.59921	1.5336	1.69372	2.04749	1.73649	1.71248	1.68913	1.65113	1.71439
1.15358	1.14136	1.14633	1.10268	1.09431	1.05662	1.03882	1.0378	1.02308	1.02039	1.02223	1.01532	0.98946	0.988861	0.974846	0.958209	0.985344	0.963956	0.962033	0.951693	0.962841	0.961829	0.967287	0.965308	0.963337	0.961374	0.958288	0.96693	0.994244	0.982112	0.970273	0.990009	0.952632	0.962143	0.94477	0.961092	0.946698	0.916061	0.902066	0.937576	0.975996	1.03497	1.00749	0.981433	0.977554	0.973705	0.959693	0.946077	0.964929	0.984547
0.866086	0.984594	1.13058	1.3119	1.51311	1.73196	1.71755	1.51096	1.47516	1.54089	1.48829	1.45359	1.39011	1.38357	1.35646	1.34185	1.32525	1.27948	1.33923	1.34574	1.29301	1.30907	1.3288	1.32565	1.31392	1.33912	1.3653	1.36925	1.40547	1.47507	1.46838	1.53614	1.56461	1.59415	1.60163	2.03869	1.49043	1.66181	1.71247	1.65677	1.73909	1.73162	1.73799	1.80682	1.88131	1.96585	1.94884	1.94765	1.87944	1.95403
1.35489	1.3737	1.34158	1.31055	1.22679	1.22948	1.24266	1.19407	1.17024	1.15694	1.08839	1.15376	1.19548	1.16964	1.18595	1.14428	1.20427	1.17374	1.21392	1.21512	1.24731	1.25246	1.24199	1.25317	1.26456	1.25139	1.26376	1.27639	1.26735	1.32674	1.32146	1.37353	1.41612	1.41558	1.35031	1.67375	1.26677	1.42284	1.40326	1.38422	1.38841	1.37154	1.37345	1.44205	1.46946	1.49794	1.51458	1.45055	1.48522	1.52345
1.23921	1.22218	1.18489	1.17528	1.20518	1.21365	1.20489	1.2053	1.21541	1.22569	1.18623	1.22401	1.23975	1.20306	1.22674	1.22806	1.2584	1.24887	1.27016	1.31359	1.36949	1.34518	1.36337	1.42843	1.43967	1.48328	1.47855	1.52132	1.69941	1.59211	0.815092	0.834785	1.05844	1.05064	0.99239	0.993741	0.98823	0.904968	1.14024	1.20767	1.22652	1.49413	1.67033	1.75594	1.86196	1.79889	1.75786	1.73741	1.71744	1.69354
1.18668	1.16032	1.09813	1.1055	1.11303	1.17286	1.32098	1.27206	1.15378	1.2039	1.29682	1.33744	1.71236	1.4778	1.31366	1.46292	1.38318	1.40442	1.35159	1.23908	1.22317	1.24035	1.08604	1.41004	1.36971	1.53745	1.35456	1.27127	1.69865	1.72373	1.6401	1.45329	1.76154	1.44842	1.55989	1.52532	1.49225	1.46059	1.29462	1.16252	1.24831	1.17897	1.37911	1.40471	1.42049	1.33895	1.6956	1.50738	1.48314	1.4356
1.532	1.55014	1.53595	1.52463	1.54809	1.50347	1.50543	1.4862	1.49368	1.46659	1.40628	1.3991	1.37657	1.37779	1.34921	1.3212	1.31952	1.31783	1.28551	1.2573	1.23594	1.2189	1.19744	1.19752	1.17622	1.20126	1.18182	1.16922	1.17176	1.13145	1.14773	1.13866	1.13052	1.11868	1.10115	1.10727	1.1032	1.08407	1.07599	1.07153	1.12282	1.13649	1.10542	1.07956	1.11381	1.11042	1.16907	1.17326	1.21044	1.22223
0.851348	0.900662	0.856548	0.883187	0.870044	0.879613	0.886827	0.90393	0.935193	0.957264	0.940792	0.906011	0.921557	0.901523	0.882343	0.933945	0.915259	0.892554	0.912046	0.913736	0.934677	0.935839	0.902355	0.934344	0.927808	0.92424	0.967041	0.975559	0.943063	0.979912	0.942061	1.05191	1.06594	1.12168	1.16709	1.16601	1.10834	1.15423	1.14261	1.14585	1.16671	1.22373	1.20319	1.27942	1.20388	1.29627	1.34287	1.36622	1.30679	1.38119
1.02709	0.94235	0.988746	1.03995	1.06626	1.04953	1.03331	0.997638	0.968207	0.940463	0.914264	0.938485	0.928215	0.917125	0.906297	0.89864	0.891112	0.910401	0.90483	0.899326	0.893889	0.888294	0.841219	0.880985	0.87118	0.861591	0.85221	0.88196	0.888502	0.919406	0.927792	0.917076	0.920756	0.924464	0.937018	0.925962	0.962841	0.975049	0.97319	0.96983	0.98508	0.993492	0.989256	0.969544	1.01509	1.01989	1.03685	1.05102	1.06559	1.01879
1.64874	1.62417	1.56653	1.55147	1.54721	1.53034	1.52196	1.51732	1.51379	1.5345	1.48543	1.48291	1.50349	1.43792	1.46703	1.46812	1.46661	1.43175	1.45222	1.43386	1.43762	1.42623	1.42468	1.39582	1.3994	1.42341	1.39522	1.36864	1.40457	1.40483	1.37518	1.38464	1.39424	1.35981	1.38623	1.40625	1.29658	1.33769	1.32894	1.31507	1.34529	1.36387	1.39136	1.40927	1.38191	1.36466	1.30365	1.27972	1.26366	1.24799
0.899029	0.803919	0.900535	0.867554	0.946921	0.922643	0.894532	0.901986	0.901783	0.858684	0.87537	0.866042	0.891361	0.865625	0.809934	0.82286	0.813207	0.803778	0.850472	0.816552	0.786654	0.805137	0.785578	0.791637	0.736688	0.757236	0.756221	0.803475	0.788836	0.812079	0.836734	0.851785	0.867387	0.883572	0.900372	0.875778	0.928037	0.954083	0.981632	0.938541	0.918555	0.931064	0.943919	0.957134	0.970724	0.984706	1.04365	1.12583	1.11897	1.125
1.20465	1.17272	1.17956	1.15708	1.15328	1.14951	1.11763	1.12525	1.13911	1.15333	1.18909	1.21139	1.23377	1.2557	1.25772	1.28632	1.25661	1.27485	1.29363	1.31907	1.34554	1.36391	1.31267	1.32162	1.27408	1.2681	1.22512	1.18497	1.17354	1.16233	1.149	1.13598	1.13668	1.13738	1.09586	1.13482	1.14802	1.16154	1.20406	1.21014	1.21628	1.22247	1.30177	1.33111	1.36819	1.38479	1.37059	1.37379	1.40015	1.38384
1.21504	1.19428	1.18046	1.19942	1.19177	1.20518	1.19094	1.19058	1.20849	1.21634	1.20761	1.2065	1.21611	1.20709	1.20244	1.21997	1.21426	1.23744	1.19636	1.22407	1.21522	1.23568	1.25297	1.21698	1.20535	1.19394	1.17423	1.17297	1.21671	1.24413	1.26223	1.25206	1.24205	1.29267	1.27511	1.40582	1.18675	1.23722	1.22236	1.19388	1.25927	1.33225	1.38215	1.39487	1.39868	1.37872	1.33515	1.30321	1.28665	1.31924
0.950661	0.963475	0.957069	0.960874	0.966031	0.951992	0.952145	0.939334	0.951484	0.958782	0.978129	0.978037	0.97887	0.995075	1.00339	1.00914	1.00798	1.04592	1.05683	1.06261	1.06289	1.07394	1.10118	1.1026	1.09999	1.09044	1.13289	1.14766	1.19405	1.22517	1.278	1.36729	1.441	1.43588	1.4738	1.45508	1.43682	1.51666	1.52826	1.49923	1.55906	1.5866	1.61804	1.6836	1.6682	1.71292	1.70149	1.68451	1.67277	1.65954
1.5402	1.50935	1.44339	1.49183	1.45303	1.42717	1.40222	1.37812	1.40603	1.4153	1.3555	1.3522	1.29099	1.31848	1.25792	1.2374	1.24922	1.26126	1.22086	1.18902	1.17335	1.17119	1.20806	1.23446	1.14076	1.19126	1.22754	1.21483	1.18766	1.27579	1.23959	1.21319	1.19438	1.1993	1.15417	1.28917	1.18048	1.28585	1.20164	1.30148	1.33481	1.38295	1.40909	1.39288	1.37703	1.34629	1.36458	1.38368	1.35203	1.41379
0.868369	0.888475	0.892016	0.895585	0.899183	0.882089	0.865633	0.84978	0.834497	0.819754	0.805522	0.831274	0.761076	0.795852	0.833959	0.859439	0.796409	0.855097	0.75355	0.764554	0.817279	0.777902	0.795241	0.81337	0.813062	0.819109	0.825248	0.794046	0.77527	0.757361	0.792348	0.830725	0.751183	0.846445	0.822362	0.837705	0.853631	0.860323	0.80765	0.834921	0.889846	0.866534	0.895297	0.949536	0.849556	1.07564	1.11825	1.09239	1.03496	0.960234
1.27625	1.25149	1.23088	1.24119	1.23144	1.15213	1.18311	1.23068	1.22546	1.28028	1.28014	1.24703	1.21559	1.30139	1.27267	1.28763	1.32969	1.28099	1.23574	1.20988	1.26432	1.22731	1.2106	1.20019	1.19451	1.2015	1.19613	1.19342	1.16957	1.14666	1.19012	1.18808	1.18604	1.14407	1.16618	1.18915	1.15909	1.13051	1.10536	1.12087	1.0971	1.10547	1.11397	1.12585	1.25021	1.36481	1.32886	1.33781	1.32333	1.30916
1.00763	0.986555	0.979489	0.971855	0.965621	0.969824	0.959874	0.968009	0.974816	0.98172	0.986598	0.98278	0.978992	0.968164	0.957574	0.949798	0.944913	0.945261	0.944802	0.942682	0.939479	0.936297	0.944668	0.953189	0.961865	0.950141	0.938699	0.934538	0.948552	0.962993	0.975134	0.986911	0.998976	0.996022	0.993085	1.00566	1.01856	1.03464	1.05198	1.04648	1.07179	1.09835	1.12627	1.16121	1.1984	1.2013	1.20422	1.20031	1.19643	1.19258
1.51145	1.48955	1.49417	1.48632	1.49501	1.5	1.48318	1.46398	1.49253	1.45515	1.45362	1.41871	1.40809	1.45561	1.43592	1.41845	1.44098	1.42077	1.38268	1.33416	1.35316	1.36693	1.27862	1.32544	1.32831	1.33337	1.33847	1.34946	1.34517	1.34091	1.33667	1.3521	1.38844	1.38882	1.43802	1.48751	1.46273	1.52456	1.59836	1.38721	1.52676	1.52031	1.5251	1.52993	1.53478	1.53967	1.5492	1.55885	1.53755	1.54975
1.04114	1.05111	1.02994	1.00959	1.01178	0.978029	0.989033	0.954112	0.953322	0.938001	0.905297	0.89913	0.906112	0.899949	0.888972	0.879245	0.857274	0.830395	0.80515	0.819838	0.814194	0.808626	0.788569	0.778055	0.767818	0.757846	0.766932	0.776239	0.785775	0.791686	0.785313	0.781613	0.757457	0.77239	0.802099	0.713799	0.729614	0.746145	0.746934	0.747725	0.785416	0.827109	0.782262	0.780485	0.795357	0.810806	0.881094	0.933324	0.992136	1.07372
1.40216	1.43269	1.46458	1.49792	1.53281	1.6236	1.56251	1.50584	1.45314	1.404	1.39378	1.31945	1.25265	1.32372	1.33103	1.27405	1.3691	1.37598	1.39041	1.36037	1.63738	2.05606	1.68364	2.48446	2.73863	2.64091	2.78997	2.95686	3.14498	3.35867	3.38766	2.97834	3.50052	3.10872	3.77539	3.69402	2.26049	2.43902	2.61463	3.47158	2.43774	2.02338	1.72942	1.51004	1.34005	1.4056	1.27004	1.31187	1.26607	1.12737
1.22186	1.24006	1.29946	1.24443	1.24278	1.24113	1.22923	1.2295	1.16534	1.16921	1.17122	1.17323	1.15601	1.15302	1.13832	1.16947	1.13265	1.17042	1.11705	1.08958	1.04607	1.07285	1.10105	1.09663	1.12937	1.16413	1.15651	1.18756	1.20482	1.21796	1.22192	1.21558	1.22343	1.19842	1.2221	1.24673	1.15144	1.22104	1.20546	1.19294	1.23205	1.34695	1.26937	1.42134	1.42615	1.50172	1.55562	1.59157	1.62922	1.73455
1.21012	1.17764	1.19774	1.16875	1.17271	1.16404	1.20889	1.21348	1.24327	1.2776	1.30653	1.31717	1.3396	1.32274	1.35029	1.32037	1.30037	1.31759	1.31896	1.3057	1.27277	1.24692	1.2221	1.23642	1.22136	1.25597	1.27813	1.30532	1.33743	1.35413	1.27843	1.30842	1.34687	1.38765	1.53044	1.70599	1.35772	1.34512	1.18643	1.0584	1.04495	1.02493	1.00567	1.02313	1.04122	1.10469	1.13681	1.15832	1.3418	1.26661
1.32378	1.27019	1.29938	1.24454	1.26123	1.2075	1.17324	1.16815	1.1622	1.18713	1.20762	1.21761	1.22111	1.2638	1.24388	1.25687	1.30377	1.32383	1.34423	1.36701	1.37733	1.38399	1.40587	1.41686	1.43824	1.42448	1.47879	1.50382	1.49095	1.49815	1.49345	1.49583	1.52859	1.5154	1.53975	1.64064	1.45101	1.59712	1.54748	1.57456	1.64031	1.67259	1.68894	1.73958	1.72043	1.82216	1.78811	1.84254	1.73886	1.64623
1.79683	1.99751	1.84153	2.18896	1.99919	1.76853	2.24986	2.27926	2.62714	2.47235	2.59431	2.44813	2.56346	2.25543	2.75304	2.71178	2.50812	3.03717	2.37589	3.02128	2.46256	2.11637	1.27489	1.30087	1.32593	1.3788	1.32964	1.33332	1.4253	1.39585	1.41152	1.43975	1.33746	1.37418	1.45179	1.80457	1.34275	1.43106	1.37138	1.36027	1.27811	1.46926	1.31894	1.19653	1.0949	1.00919	1.1167	1.24983	1.41902	1.64117
	1.19666	1.18665	1.20877	1.23174	1.25417	1.25509	1.26413	1.28233	1.30271	1.27119	1.32048	1.2573	1.24543	1.26288	1.28084	1.27254	1.25105	1.25897	1.27049	1.24389	1.26216	1.28098	1.25117	1.25113	1.24291	1.2511	1.25941	1.28147	1.29381	1.28648	1.30399	1.34515	1.38529	1.4279	1.46844	1.41391	1.41522	1.39237	1.45554	1.4545	1.47072	1.50794	1.47585	1.57272	1.57504	1.63136	1.69186	1.74117	1.69158
		1.43799	1.29075	1.28309	1.30004	1.39468	1.332	1.61289	1.43855	1.29823	1.36732	1.30126	1.24128	1.31516	1.25238	1.19246	1.13801	1.03779	1.14093	1.11384	1.15997	1.06072	1.12495	1.15825	1.20911	1.14805	1.15193	1.16669	1.16	1.22454	1.11857	1.16157	1.20689	1.23029	1.21115	1.20583	1.26238	1.28305	1.25812	1.36295	1.46111	1.53351	1.48247	1.51867	1.44173	1.32925	1.35663	1.298	1.46013
		1.04967	1.09453	1.10305	1.12036	1.15553	1.15293	1.16557	1.16525	1.15808	1.13199	1.16076	1.12353	1.13346	1.17078	1.16668	1.21487	1.28373	1.25517	1.20014	1.1963	1.16481	1.2432	1.22285	1.26344	1.22075	1.22134	1.21749	1.25288	1.27118	1.24654	1.32896	1.23229	1.49331	1.25268	1.14589	1.19518	1.15699	1.14833	1.18463	1.50466	1.90979	1.45631	1.40567	1.49184	1.51382	1.47214	1.50994	1.47008
		0.809768	0.758651	0.904131	0.980213	1.0047	1.0675	1.1549	1.2179	1.26764	1.24162	1.31025	1.30662	1.29089	1.2802	1.28319	1.2642	1.23951	1.26089	1.30825	1.28832	1.26674	1.29271	1.28972	1.28675	1.33195	1.30002	1.33019	1.38922	1.39951	1.47157	1.46446	1.51821	1.50116	1.6821	1.455	1.59194	1.53922	1.57742	1.59419	1.64783	1.63488	1.65661	1.74027	1.70383	1.68957	1.65367	1.68716	1.72203
						2.74996	2.81549	2.63012	2.35723	2.37149	2.35675	2.34219	2.32781	2.37561	2.29149	2.30795	2.29641	2.12237	1.51805	2.16329	2.19177	2.05325	2.46131	2.16134	2.05642	2.19295	2.25304	2.24114	2.09268	2.00142	2.098	2.11042	1.93153	1.94931	3.02642	1.82782	2.20333	2.04233	2.05285	1.95668	1.86069	1.90641	1.97795	2.05508	2.07949	2.22536	2.07444	2.22927	2.02835
																										1.92674	1.93164	1.93756	1.94352	1.94952	1.95555	1.95362	1.96119	1.82772	2.30297	1.47363	1.62385	1.80818	1.82757	1.84737	1.80514	1.81796	1.93236	1.86618	1.90073	2.03183	1.87065	1.86213	1.85369
																1.2829	1.2838	1.2847	1.29273	1.27784	1.25282	1.26815	1.26578	1.26342	1.26106	1.25993	1.2588	1.25767	1.25654	1.25542	1.2543	1.25318	1.25206	1.25094	1.29456	1.26356	1.23401	1.21956	1.24381	1.26104	1.24464	1.27315	1.26682	1.2502	1.30895	1.35717	1.39704	1.46956	1.55001
																												1.68526	1.69457	1.69612	1.66903	1.69581	1.70497	1.73055	1.88918	1.60949	1.68548	1.64736	1.64854	1.64973	1.60351	1.6214	1.63959	1.65842	1.67794	1.71267	1.67438	1.63776	1.61579
																												2.48632	2.4421	2.40516	2.56529	2.74827	2.95935	3.20556	3.49645	3.84541	4.27174	4.80439	5.4888	5.44272	5.39741	5.35284	4.71211	5.39396	5.60663	6.06488	5.73503	5.86146	5.83981
																																						1.00044	1.08473	1.10517	1.33334	1.5298	1.61269	1.67781	1.64584	1.6485	1.59228	1.53821	1.55538
																																								1.56272	1.58087	1.59945	1.61847	1.63777	1.65753	1.67778	1.69853	1.7198	1.74161
																																													0.901974	1.09907	1.11716	1.30556	1.55002
																																																1.03047	1.01025
1.16729	1.16527	1.2152	1.25437	1.25941	1.27203	1.23119	1.23622	1.19901	1.22758	1.25663	1.22638	1.23559	1.22585	1.16664	1.15721	1.14973	1.1583	1.15037	1.12687	1.13425	1.1652	1.18418	1.19988	1.18335	1.15776	1.15845	1.14312	1.14385	1.13186	1.12445	1.07607	1.0524	1.01579	0.998826	0.981231	0.996272	0.987524	0.977388	0.943161	0.979634	1.02237	1.0129	1.03157	1.02262	1.01711	1.03722	1.01828	1.02574	1.03358
1.27457	1.29776	1.30682	1.29654	1.26315	1.28156	1.28678	1.28441	1.22708	1.27437	1.25104	1.27141	1.26289	1.30343	1.29632	1.29872	1.29542	1.31077	1.32347	1.34046	1.34781	1.34812	1.36683	1.41067	1.42405	1.4136	1.42456	1.42593	1.3992	1.42201	1.42729	1.45049	1.4262	1.50401	1.42464	1.4777	1.37186	1.43721	1.43109	1.51133	1.47923	1.55444	1.56913	1.62418	1.63507	1.6809	1.63981	1.66189	1.62188	1.57735
2.93941	2.72005	2.91286	2.70141	2.95977	2.87647	3.06852	3.28807	2.99913	2.94351	3.14189	3.06401	3.31884	3.17027	3.61986	3.40701	3.67591	3.55227	3.35737	3.23786	3.12656	3.22914	3.04939	3.25944	3.4114	2.95208	3.34644	3.33928	3.05312	2.85361	3.161	3.42171	4.05722	3.82559	4.32914	7.23635	2.89517	3.97792	3.75824	3.16934	2.55813	2.7596	2.67521	3.56957	3.68003	3.8979	3.31198	3.18819	3.28104	3.0464
1.59114	1.89876	1.84256	1.94708	1.64985	1.80166	1.6803	1.74774	1.90728	1.95957	1.87299	2.14425	2.03753	1.96632	2.10789	2.28502	2.19388	2.14089	2.09396	1.74684	1.83403	1.49245	1.98773	1.78756	1.5115	1.6896	1.59135	1.55185	1.56876	1.87742	1.70971	1.52184	1.63557	1.54229	1.80286	2.95768	1.54997	1.88192	1.90412	1.96288	1.97367	2.041	2.31475	2.1787	2.42149	2.54072	2.67229	2.71041	2.62761	2.64633
1.14999	1.14918	1.13432	1.12099	1.08822	1.0673	1.05822	1.06771	1.07554	1.09177	1.11311	1.11405	1.12357	1.1349	1.16265	1.1862	1.22796	1.25812	1.28353	1.29887	1.3083	1.30935	1.36778	1.37075	1.40227	1.43563	1.43268	1.42926	1.42219	1.43583	1.40457	1.44943	1.46336	1.4179	1.42246	1.53814	1.38195	1.44189	1.39464	1.4481	1.43968	1.47936	1.47616	1.55593	1.60014	1.62207	1.60301	1.62588	1.62319	1.59606
0.922377	0.926966	0.889772	0.851525	0.861965	0.857742	0.863901	0.867961	0.854575	0.87507	0.859484	0.847395	0.821485	0.847886	0.835991	0.83816	0.836046	0.814407	0.841956	0.835764	0.816212	0.801728	0.803341	0.814414	0.827952	0.838742	0.875125	0.896718	0.908853	0.906255	0.918919	0.989671	1.0595	1.15419	1.26113	1.37111	1.31752	1.3261	1.24409	1.28426	1.26924	1.44048	1.5329	1.59452	1.70613	1.78274	1.80408	1.82406	1.82609	1.83656
1.43334	1.27369	1.31846	1.22202	1.18362	1.15411	1.01757	1.00457	0.958332	0.933086	0.926783	0.937501	0.914744	0.928634	0.958183	0.969271	1.00861	1.00152	1.00188	0.985418	0.979281	0.983206	0.974222	0.989756	0.966557	0.942785	0.966808	0.947741	0.915658	0.880279	0.892641	0.883825	0.863183	0.838874	0.83631	0.677569	0.859908	0.790641	0.810873	0.799409	0.77066	0.766055	0.761505	0.796087	0.808315	0.858654	0.921599	0.950449	0.987616	1.05405
1.26668	2.0846	0.83922	0.909779	0.883601	0.858887	1.57356	2.80075	1.19378	0.758554	0.872512	0.910967	0.91266	0.926389	0.987045	0.974878	1.02564	1.06218	1.03742	1.05532	1.09135	1.12451	1.60071	1.65417	3.36171	2.06858	2.83882	3.04392	3.32728	3.53196	2.35583	3.21432	2.33068	2.47167	1.62466	1.85578	2.16357	2.76732	2.53056	2.89567	2.92044	3.0494	2.96353	2.84455	3.11436	3.39813	3.30656	3.17414	3.21783	3.28408
1.22642	1.23214	1.23387	1.24232	1.24552	1.25286	1.29491	1.30919	1.34217	1.35692	1.37842	1.29645	1.35869	1.38039	1.35249	1.36112	1.37916	1.39103	1.39304	1.44077	1.43272	1.46273	1.43921	1.39477	1.45423	1.48573	1.49038	1.44421	1.4881	1.53172	1.52867	1.54993	1.53499	1.55479	1.52338	1.95715	1.41751	1.58077	1.66935	1.81573	1.05701	0.790533	0.652295	0.941571	0.955449	0.971803	0.807812	1.00475	1.06295	1.03865
1.4461	1.4414	1.41447	1.41353	1.3823	1.37468	1.33061	1.35271	1.35272	1.3469	1.33556	1.35413	1.32617	1.31669	1.33428	1.34901	1.36047	1.35945	1.37029	1.35853	1.36464	1.34895	1.34995	1.33583	1.34151	1.37652	1.36372	1.3683	1.41036	1.40863	1.42179	1.40238	1.40128	1.39738	1.42477	1.48731	1.36491	1.47226	1.47981	1.47886	1.50165	1.52383	1.58413	1.59047	1.653	1.67475	1.67175	1.63792	1.69378	1.68013
1.43835	1.47582	1.50083	1.50626	1.51734	1.4639	1.49043	1.54231	1.44119	1.46631	1.62392	1.60192	1.68107	1.64577	1.66025	1.64941	1.54866	1.5198	1.52972	1.49495	1.97588	1.94056	1.87981	1.66656	1.88292	1.72322	1.5192	1.64097	1.92141	1.75773	1.95692	1.96528	1.98251	2.00004	1.9573	2.67129	1.68376	2.03623	1.9922	1.87791	1.85659	1.95522	2.04406	1.94227	2.10757	2.19349	2.21195	2.22426	2.30256	2.17782
0.853502	0.856128	0.8324	0.809286	0.800092	0.800819	0.792652	0.792195	0.808302	0.800543	0.801588	0.796078	0.78407	0.774557	0.769413	0.737465	0.760371	0.788076	0.777314	0.773734	0.765447	0.767213	0.790535	0.795614	0.796531	0.805817	0.844403	0.887545	0.895009	0.90592	0.913591	0.871131	0.884851	0.888434	0.874041	0.856438	0.904182	0.903657	0.9261	0.943634	1.0017	1.03723	1.07537	1.1303	1.1935	1.18514	1.17224	1.16934	1.17177	1.15154
1.51026	1.4919	1.49037	1.53097	1.52383	1.55037	1.56026	1.6205	1.61137	1.69195	1.67047	1.69243	1.71468	1.75516	1.75653	1.71239	1.69495	1.72462	1.69189	1.67439	1.72675	1.72671	1.77265	1.7669	1.76896	1.78953	1.77984	1.76115	1.78014	1.75796	1.81287	1.83432	1.8041	1.82008	1.8813	2.33034	1.72377	1.89179	1.85283	1.83226	1.86676	1.83642	1.86909	1.86629	1.90819	1.95021	1.95321	1.95344	1.93491	1.86302
0.77961	0.782549	0.784995	0.807184	0.822869	0.833122	0.821268	0.843546	0.859323	0.872419	0.893076	0.857499	0.882004	0.920936	0.923062	0.925199	0.923269	0.942813	0.946574	0.953249	0.944387	0.956611	0.964054	0.961081	0.963898	1.01986	1.02705	1.04692	1.04585	1.04039	1.02488	1.00848	1.00163	0.997858	0.998477	0.999098	0.997641	0.980657	0.952574	0.906511	0.959765	1.06938	1.12031	1.17635	1.2418	1.28712	1.30727	1.33169	1.3372	1.35721
1.46666	1.47241	1.46486	1.48425	1.49578	1.51986	1.50541	1.47624	1.46884	1.47822	1.48772	1.40747	1.42747	1.39876	1.47032	1.46255	1.45486	1.44726	1.44887	1.45049	1.45211	1.45374	1.48136	1.50466	1.53487	1.54669	1.5587	1.56607	1.54969	1.55041	1.55113	1.56782	1.63631	1.65301	1.64245	1.92718	1.45554	1.50678	1.56175	1.58991	1.63928	1.66041	1.67556	1.71284	1.75182	1.77079	1.83886	1.8569	1.84795	1.84503
1.25385	1.2597	1.25035	1.25358	1.25769	1.20878	1.20843	1.19835	1.26204	1.23179	1.18437	1.18847	1.18512	1.20682	1.16956	1.17553	1.21041	1.13063	1.13619	1.15275	1.15107	1.16676	1.16486	1.21245	1.19177	1.25397	1.22481	1.20726	1.25583	1.25311	1.19988	1.29724	1.28422	1.30053	1.27468	1.54659	1.23632	1.31095	1.38442	1.41814	1.44189	1.41013	1.37973	1.46722	1.43141	1.39778	1.41198	1.37202	1.44062	1.54747
0.97107	0.926172	0.907347	0.907371	0.910075	0.887856	0.893692	0.883178	0.916962	0.890711	0.908734	0.926207	0.916259	0.868802	0.865868	0.880164	0.8513	0.8473	0.870476	0.892702	0.915254	0.905957	0.907895	0.953654	0.992252	1.03036	0.974159	1.00454	1.05511	1.01985	1.03747	1.04569	1.02861	1.05147	1.03415	1.046	1.05813	1.0568	1.05426	1.07908	1.17335	1.22229	1.24765	1.30812	1.32967	1.34933	1.29795	1.29683	1.31038	1.27403
1.11798	1.0894	1.11034	1.08427	1.06104	1.07532	1.05457	1.03676	1.02222	1.00032	0.974186	0.944932	0.907162	0.922955	0.939307	1.01587	0.974953	1.004	0.971766	1.05891	1.05844	1.12905	1.13265	1.15235	1.15276	1.14753	1.1302	1.1347	1.0882	1.09207	1.08747	1.03756	1.0577	1.04469	1.03424	1.01139	0.997477	0.947472	0.947427	0.908586	0.893014	0.877968	0.899857	0.922866	0.95526	0.983575	1.0094	0.979806	0.966339	0.953237
1.18599	1.20693	1.17699	1.17695	1.19575	1.17124	1.20763	1.19906	1.19062	1.20764	1.19042	1.21138	1.2331	1.22424	1.22108	1.26578	1.20786	1.15502	1.15934	1.29887	1.20772	1.32367	1.33747	1.32685	1.32181	1.3168	1.22955	1.33813	1.3292	1.36013	1.32568	1.36365	1.36259	1.35328	1.36083	1.40471	1.38296	1.46223	1.52607	1.54986	1.63301	1.70783	1.7577	1.79651	1.74956	1.68392	1.59645	1.61882	1.64183	1.72205
0.953194	0.927864	0.933226	0.89679	0.909906	0.876211	0.878112	0.867581	0.884128	0.883348	0.885202	0.838512	0.841624	0.84959	0.849926	0.868569	0.902705	0.923981	0.920225	0.927209	0.94468	0.939307	0.960792	0.942764	0.955221	0.964006	0.925827	0.915195	0.916784	0.882197	0.927037	0.931094	0.958273	0.949056	0.964361	0.977926	0.973325	0.949317	0.964257	0.97646	0.980396	1.04192	1.1415	1.19847	1.2269	1.26259	1.32772	1.3153	1.3019	1.25826
1.10142	1.1103	1.08683	1.05692	1.03398	1.02979	1.03027	1.02675	1.00901	1.0199	1.00623	1.02685	1.0129	1.00352	0.984604	0.99059	0.99857	1.00831	0.998272	0.99314	0.963722	0.966887	0.94657	0.960091	0.958806	0.958665	0.958819	0.970219	0.96059	0.961981	0.93689	0.954716	0.948157	0.963149	0.97701	0.984141	0.963815	0.992431	0.955375	0.953094	0.981464	1.02661	1.07648	1.07738	1.10454	1.1117	1.11198	1.10732	1.1229	1.16597
0.847987	1.00527	0.837976	0.898465	1.05751	1.20331	1.29851	1.26164	1.3243	1.34005	1.30555	1.20432	1.20989	1.21552	1.20976	1.19252	1.22917	1.20575	1.18491	1.17483	1.19363	1.215	1.18934	1.21021	1.19885	1.22757	1.25218	1.17756	1.20356	1.25185	1.30559	1.36416	1.3246	1.36633	1.30486	1.71875	1.23211	1.3329	1.29952	1.37496	1.33168	1.35383	1.43948	1.45635	1.47409	1.49226	1.51088	1.45472	1.40258	1.41355
1.22322	1.25012	1.26277	1.2591	1.26535	1.26338	1.27379	1.25621	1.22359	1.22374	1.18332	1.14545	1.10429	1.085	1.05313	1.03899	1.01273	1.02653	1.00108	1.01543	1.02092	1.01258	1.00904	1.03742	1.04479	1.06893	1.07021	1.08428	1.09323	1.08245	1.07333	1.07128	1.05157	1.06186	1.05507	1.05749	1.00079	1.02586	1.01978	1.0318	1.07786	1.14536	1.20137	1.21074	1.24939	1.2452	1.23238	1.20686	1.1883	1.1488
1.44498	1.40933	1.43694	1.415	1.43041	1.44078	1.467	1.48868	1.48764	1.53223	1.49596	1.40029	1.31955	1.3827	1.28405	1.32235	1.3032	1.34442	1.42583	1.34059	1.39169	1.40579	1.48512	1.45354	1.39518	1.40514	1.39047	1.39757	1.40853	1.37813	1.39802	1.42256	1.59586	1.66121	1.80202	1.90899	1.4887	1.74494	1.61946	1.75097	1.97175	1.70178	2.00492	2.31971	2.27554	2.30767	2.30894	2.32648	2.32268	2.20584
1.35012	1.33228	1.33437	1.36901	1.39703	1.37132	1.37693	1.35711	1.43405	1.39028	1.37238	1.38278	1.38546	1.41224	1.38271	1.40266	1.39406	1.47691	1.38002	1.52549	1.46198	1.43601	1.49431	1.49236	1.49564	1.50226	1.43564	1.40688	1.38566	1.38611	1.39702	1.38535	1.39282	1.37209	1.45084	1.56102	1.31454	1.31285	1.4345	1.51784	1.479	1.47016	1.45469	1.5448	1.46217	1.66731	1.77574	1.83743	1.7981	1.83797
1.88317	1.40844	1.35479	1.33201	1.59172	1.4521	1.44533	1.34105	1.5776	1.36096	1.33338	1.3665	1.39513	1.33296	1.39045	1.37887	1.39143	1.39567	1.99235	1.36288	1.4047	1.67792	1.59485	1.80687	2.01079	1.91793	1.78201	1.90294	2.04147	1.8729	2.16937	2.29841	2.31786	2.00861	2.37821	2.85862	2.06147	2.70935	2.31003	2.2429	1.92266	2.14863	2.52418	2.33631	2.77681	2.60173	2.10994	2.66009	2.20507	2.26693
0.856952	0.794562	0.81103	0.804929	0.815355	0.801312	0.785007	0.796131	0.807453	0.794949	0.778429	0.812836	0.833829	0.843285	0.843684	0.823921	0.829502	0.835579	0.827145	0.843725	0.849837	0.854568	0.848086	0.863887	0.904206	0.940325	0.944419	0.935973	0.905579	0.877096	0.837743	0.83367	0.817902	0.821574	0.808747	0.81378	0.838797	0.841453	0.825531	0.820561	0.85205	0.87655	0.894756	0.918349	0.944385	0.984167	0.983347	1.01064	0.997454	1.01304
0.663983	0.618072	0.61508	0.612117	0.609182	0.606275	0.585039	0.56524	0.546738	0.547506	0.577183	0.552215	0.529318	0.508244	0.488784	0.470759	0.49746	0.46109	0.506027	0.510277	0.456987	0.507895	0.505921	0.503961	0.451985	0.445081	0.45302	0.454107	0.520251	0.499334	0.503866	0.495882	0.488148	0.526682	0.571821	0.484799	0.495328	0.49885	0.498884	0.496618	0.478416	0.467784	0.461597	0.411489	0.527299	0.52291	0.501545	0.450846	0.475362	0.629974
0.902846	0.901578	0.865193	0.874496	0.889124	0.880266	0.85081	0.88757	0.878627	0.896962	0.905732	0.924199	0.952988	0.967704	0.977641	0.981222	0.975441	0.95581	0.940558	0.944925	0.970998	0.984548	0.986655	1.00832	1.02558	1.03972	1.04792	1.03446	1.03772	1.04301	1.04952	1.06108	1.05793	1.05172	1.09486	1.11324	1.12138	1.1437	1.11898	1.08858	1.10436	1.15553	1.21081	1.24278	1.28812	1.3123	1.33134	1.32117	1.32259	1.32978
1.42639	1.39587	1.39964	1.40342	1.37245	1.39498	1.452	1.5306	1.52492	1.52668	1.58254	1.57585	1.56418	1.71485	1.56961	1.71038	1.59476	1.65652	1.66356	1.586	1.5995	1.61324	1.62994	1.62349	1.63886	1.61312	1.60909	1.4537	1.32567	1.14018	1.10043	1.13214	1.04111	1.05805	1.06152	1.04959	0.996484	1.03651	1.03963	1.0632	1.05607	1.06221	1.11312	1.16009	1.15113	1.13901	1.07638	1.02357	1.03437	1.02606
1.29617	1.28905	1.282	1.27929	1.27105	1.26292	1.31122	1.29748	1.3384	1.32513	1.3495	1.34277	1.3361	1.32951	1.34913	1.34043	1.32989	1.33415	1.36803	1.32105	1.34965	1.3651	1.22839	1.23255	1.40322	1.38406	1.4007	1.41273	1.42496	1.43741	1.4196	1.38279	1.33254	1.33881	1.31594	1.32141	1.27703	1.23492	1.20271	1.23297	1.33535	1.50491	1.6189	1.67675	1.65546	1.6347	1.59582	1.55874	1.52335	1.48954
1.3321	1.34289	1.32917	1.35841	1.28767	1.3159	1.35108	1.32457	1.35186	1.373	1.33527	1.34744	1.35598	1.3516	1.35633	1.36251	1.37856	1.38306	1.40497	1.38889	1.36085	1.38353	1.38772	1.38128	1.39668	1.40324	1.42276	1.41836	1.42186	1.43693	1.45045	1.47712	1.47623	1.43621	1.46667	1.75317	1.42863	1.51991	1.52421	1.56124	1.62012	1.62344	1.66701	1.65772	1.65385	0.847287	0.923682	1.01522	1.07154	1.07143
1.21916	1.19209	1.16098	1.16455	1.13871	1.10325	1.06992	1.07401	1.07813	1.07598	1.07384	1.07171	1.06475	1.05788	1.08536	1.08161	1.07975	1.10554	1.08305	1.10683	1.13488	1.12208	1.10404	1.11805	1.13242	1.10988	1.13483	1.13189	1.15743	1.1672	1.19678	1.19587	1.19495	1.20945	1.21581	1.26762	1.14556	1.17919	1.18668	1.19427	1.20196	1.25305	1.30867	1.33014	1.32027	1.31054	1.34122	1.32705	1.33287	1.33697
										1.7551	1.71401	1.71622	1.71843	1.67159	1.66432	1.72591	1.73472	1.74553	1.7527	1.75634	1.75999	1.76366	1.80572	1.82437	1.77325	1.7866	1.76542	1.80288	1.78915	1.79552	1.79202	1.79536	1.79871	2.01077	2.27952	1.6375	1.85199	1.87482	1.83415	1.83501	1.83127	1.82337	1.78984	1.86887	1.85831	1.84787	1.87105	1.89173	1.84889
1.36961	1.35234	1.3375	1.33913	1.35492	1.3469	1.35791	1.35042	1.34573	1.34511	1.34808	1.31769	1.32442	1.28961	1.30512	1.32416	1.31518	1.32954	1.31382	1.29152	1.25937	1.26273	1.24437	1.25597	1.26698	1.26164	1.27371	1.28348	1.30632	1.32988	1.33725	1.33964	1.32174	1.32029	1.28109	1.31475	1.25192	1.2857	1.31695	1.33166	1.36389	1.41235	1.44937	1.5143	1.57268	1.58533	1.5844	1.56129	1.53927	1.56125
1.00804	0.938482	0.924768	0.89466	0.889369	0.920683	0.954283	0.946553	0.945374	0.994629	1.00223	1.01722	1.00493	1.0472	1.05214	1.05712	1.04126	1.00881	1.03709	0.991348	1.00954	0.996928	0.979397	0.962471	0.94612	0.94965	0.950969	0.952942	0.954923	0.956966	0.953673	0.953208	0.964741	0.985882	0.980986	0.971351	0.970538	0.969726	0.973273	0.948272	1.03253	1.16152	1.2188	1.29117	1.24608	1.22543	1.12353	1.12125	1.12401	1.07678
0.921697	0.907353	0.981992	0.983546	0.891847	0.815788	0.887376	0.794032	0.784432	0.775061	0.765912	0.756976	0.76304	0.803551	0.848605	0.821331	0.741007	0.721056	0.745483	0.734397	0.829574	0.871744	0.787418	0.869297	0.875774	0.882348	0.836746	0.893203	0.90582	0.918799	0.902238	0.918421	0.919378	0.944687	0.855802	0.900943	0.932245	0.947208	0.903802	0.937052	0.935371	0.973839	1.01561	1.06112	1.1109	1.16558	1.14829	1.13151	1.07709	1.05918
1.18384	1.18046	1.1986	1.15418	1.15186	1.14529	1.16439	1.1662	1.1914	1.16895	1.16601	1.1865	1.21858	1.21808	1.21757	1.261	1.27635	1.26797	1.2597	1.24593	1.28761	1.294	1.27247	1.29554	1.29592	1.25322	1.25639	1.24558	1.17965	1.20831	1.18942	1.17111	1.15335	1.11321	1.12734	1.18792	1.14854	1.14527	1.14201	1.13878	1.19215	1.25077	1.29932	1.35179	1.40868	1.47056	1.49845	1.49437	1.49031	1.48627
1.29706	1.3243	1.35271	1.26757	1.26603	1.2645	1.27498	1.27316	1.28541	1.2979	1.31064	1.32363	1.30258	1.28218	1.26241	1.33486	1.32619	1.31168	1.30648	1.2826	1.26099	1.27787	1.2861	1.29443	1.27687	1.23254	1.19118	1.22443	1.19522	1.16737	1.15346	1.13988	1.12574	1.08976	1.06035	1.07729	1.09478	1.11186	1.06661	1.09335	1.12146	1.15106	1.18226	1.2288	1.21265	1.15805	1.22058	1.22321	1.22585	1.21137
0.856842	0.8625	0.835427	0.836158	0.837901	0.846134	0.852649	0.844452	0.85097	0.827705	0.834494	0.818762	0.801837	0.793291	0.80457	0.799874	0.769505	0.773195	0.81186	0.827416	0.810943	0.822357	0.840547	0.80772	0.835721	0.878649	0.863449	0.888812	0.91571	0.881898	0.883645	0.88572	0.945983	0.846308	0.862114	0.880002	0.911409	0.951404	1.00654	0.971993	1.03007	0.984899	1.00925	1.01243	1.0234	1.0478	1.07339	1.10025	1.09399	1.0878
																											2.60999	1.5577	2.59618	2.5643	2.53321	2.50285	2.47322	2.44428	2.41601	2.12155	1.89107	1.84049	1.76268	1.75314	1.80504	1.92925	2.0718	1.83216	1.6422	1.48793	1.45121	1.41626	1.30503
1.3808	1.38019	1.37957	1.44918	1.47092	1.45346	1.4834	1.5146	1.46124	1.44415	1.41115	1.50316	1.44559	1.44259	1.43961	1.5139	1.55766	1.43591	1.57436	1.6228	1.52029	1.42997	1.38607	1.34478	1.34623	1.31027	1.2509	1.33059	1.42112	1.40739	1.47925	1.49468	1.51044	1.52652	1.51574	1.57398	1.63689	1.70503	1.53059	1.57017	1.54249	1.65167	1.648	1.7455	1.70334	1.69192	1.65003	1.65847	1.76663	1.88987
1.33828	1.36204	1.35538	1.36688	1.35704	1.34044	1.32521	1.30675	1.26518	1.2442	1.23222	1.21443	1.21435	1.21301	1.21435	1.22635	1.23247	1.25204	1.26534	1.25567	1.26274	1.31454	1.33147	1.37332	1.38942	1.40072	1.40445	1.41805	1.40468	1.41327	1.41225	1.41059	1.38703	1.36918	1.37433	1.44599	1.33001	1.34141	1.33142	1.31197	1.36636	1.40702	1.45562	1.49848	1.55568	1.56839	1.53893	1.53456	1.51432	1.54054
																		1.49551	1.46101	1.42806	1.39656	1.37704	1.38837	1.39989	1.4116	1.41875	1.42598	1.42071	1.43341	1.40545	1.38574	1.42036	1.40512	1.41911	1.6019	1.32934	1.40284	1.39845	1.41404	1.51711	1.60776	1.67025	1.69855	1.7205	1.69933	1.66047	1.62335	1.58785	1.63074
1.54429	1.5725	1.55915	1.54602	1.55315	1.50629	1.52935	1.54322	1.52336	1.48588	1.55717	1.61834	1.51261	1.49539	1.63989	1.5564	1.93326	1.6981	1.6813	1.66482	1.64866	1.58307	1.63688	1.56976	1.63245	1.75873	1.64272	1.54108	1.62624	1.65438	1.6835	1.71367	1.74494	1.82023	1.90043	2.25687	1.60817	1.92672	1.97139	1.99682	1.96945	1.84351	1.80152	1.79348	1.88386	1.84328	1.87506	1.83355	1.87904	1.94742
0.765137	0.75811	0.681613	0.684688	0.736304	0.713621	0.656204	0.668239	0.674749	0.575364	0.534129	0.564558	0.540698	0.540155	0.550269	0.553921	0.557621	0.566804	0.569361	0.584443	0.596928	0.609957	0.623568	0.623033	0.619432	0.647436	0.625544	0.605084	0.628727	0.654292	0.682024	0.711189	0.74296	0.73508	0.727365	0.719811	0.712412	0.707098	0.701864	0.696706	0.804325	0.883554	0.980097	0.985756	0.991482	0.997274	0.945553	0.928177	0.911427	0.941593
1.01779	1.00845	1.0093	1.01016	0.993033	1.01107	1.02978	1.05113	1.07024	1.08499	1.07823	1.07509	1.06637	1.07914	1.06367	1.07438	1.05556	1.07599	1.06729	1.05338	1.07811	1.08744	1.11485	1.11481	1.1123	1.12037	1.12901	1.12015	1.1079	1.13403	1.10563	1.10543	1.16205	1.1508	1.14142	1.1071	1.11205	1.14517	1.15984	1.13013	1.09305	1.18743	1.22139	1.23075	1.28848	1.34578	1.34623	1.31968	1.35963	1.35514
1.22838	1.17413	1.18604	1.17485	1.16573	1.15674	1.16807	1.14127	1.15145	1.16336	1.15328	1.13283	1.15217	1.15874	1.13669	1.11183	1.10098	1.08134	1.0759	1.08632	1.08104	1.11799	1.09312	1.08865	1.11075	1.08924	1.06854	1.0895	1.08876	1.0766	1.06197	1.10937	1.09031	1.0719	1.1096	1.10135	1.09929	1.09456	1.08856	1.1182	1.1495	1.19159	1.19987	1.25172	1.28332	1.2805	1.2777	1.32643	1.28704	1.29576
2.15197	2.03056	2.07333	2.11794	2.07371	2.03128	2.09645	2.14842	1.93933	1.98301	1.92321	2.00209	1.97595	1.95048	1.98092	1.97406	1.96725	1.96048	1.95376	2.00856	2.06653	2.0258	2.08935	1.96368	1.98276	1.82465	1.99045	1.99142	1.92471	2.02603	1.95613	1.87944	1.79927	1.92194	1.92431	2.19921	1.62192	1.88969	1.80978	1.75414	1.75575	1.86703	1.75618	1.95028	1.73889	1.80716	1.79745	1.78494	1.82608	1.91837
1.1875	1.25989	1.23052	1.15802	1.19887	1.19309	1.16514	1.16936	1.16112	1.16547	1.1521	1.14733	1.1373	1.11706	1.12785	1.06745	1.11743	1.08368	1.05191	1.0391	1.02661	1.0545	1.04758	1.04076	1.02042	1.02223	1.00261	1.00651	1.01044	1.01439	1.01838	1.01205	1.01071	0.969494	1.01343	0.986133	1.00244	0.993253	1.00246	1.01184	1.02082	1.02997	1.04093	1.02055	1.03385	1.04013	1.04649	1.05293	1.09865	1.13366
1.14571	1.1486	1.18327	1.19803	1.20476	1.21514	1.23307	1.23848	1.24645	1.27984	1.24251	1.25406	1.24719	1.27068	1.28937	1.26812	1.27551	1.28121	1.26659	1.25985	1.22125	1.2043	1.22079	1.18211	1.19103	1.1788	1.1356	1.10111	1.06318	1.06617	1.04515	0.986182	0.993932	1.0066	0.94297	0.967089	0.970777	0.952041	0.95108	0.919362	0.942885	0.967644	0.986433	1.00709	1.04307	1.08173	1.00992	0.996708	0.983833	0.947515
1.0493	1.05371	1.03935	1.05361	1.04109	1.03215	1.02335	1.0147	1.02588	1.03731	1.03369	1.02942	1.01564	1.01959	1.02224	1.00305	1.00903	1.03949	1.04905	1.00474	1.01463	1.01652	1.01842	1.03448	1.05668	1.05742	1.07967	1.05359	1.08919	1.06388	1.06954	1.0372	1.00677	1.02295	1.03967	1.05694	1.04812	1.03946	1.01433	1.0412	1.08819	1.13962	1.19616	1.20995	1.17244	1.24784	1.20758	1.24153	1.27743	1.29666
1.45115	1.41362	1.42245	1.41762	1.39759	1.4279	1.36877	1.37955	1.35893	1.36307	1.34039	1.32386	1.37752	1.38305	1.36927	1.34444	1.39535	1.39555	1.41317	1.31652	1.38623	1.34543	1.35416	1.36162	1.36093	1.35481	1.34875	1.35669	1.34584	1.32132	1.32117	1.28828	1.29811	1.26889	1.23609	1.23419	1.2106	1.19687	1.1658	1.15538	1.18341	1.171	1.17658	1.13661	1.17377	1.19863	1.18739	1.21671	1.19586	1.17572
1.48239	1.45476	1.44024	1.40611	1.43048	1.41124	1.4443	1.43413	1.4146	1.41205	1.34435	1.35713	1.32996	1.33956	1.34547	1.31373	1.32748	1.32839	1.32763	1.31293	1.30784	1.30278	1.31937	1.30641	1.29742	1.30675	1.32277	1.32435	1.31949	1.36154	1.35904	1.36216	1.35522	1.37494	1.37483	1.45897	1.26741	1.34478	1.31447	1.33335	1.43857	1.46163	1.49286	1.53823	1.56163	1.57311	1.58477	1.57733	1.59341	1.58037
1.13163	1.12996	1.1129	1.09489	1.07745	1.09636	1.08638	1.07658	1.06914	1.06699	1.05818	1.04598	1.03418	1.02891	1.01398	0.999487	0.999073	0.992012	0.992548	0.993085	1.00274	1.01258	0.994741	1.00575	1.01564	1.00267	0.990021	0.97769	0.997013	0.985901	0.979698	0.973572	0.967523	0.960068	0.978863	0.975612	0.972383	0.971927	0.954404	0.964737	0.984062	1.00418	1.04494	1.03818	1.03848	1.05276	1.0438	1.05659	1.04197	1.06049
1.33885	1.35353	1.34438	1.31544	1.33577	1.32075	1.34405	1.27589	1.28275	1.29818	1.30006	1.25785	1.25634	1.25529	1.25011	1.27173	1.23302	1.23393	1.25501	1.2517	1.19862	1.22083	1.17028	1.21382	1.19418	1.24267	1.1625	0.93425	1.01765	0.885001	0.849726	0.817154	0.786988	0.75897	0.900389	0.899781	0.899174	0.898568	0.898503	0.898438	1.23401	1.21173	1.24058	0.717011	0.779735	0.623583	0.610184	0.553334	0.533682	0.511605
0.845675	0.85746	0.878854	0.873617	0.882752	0.867313	0.875549	0.926094	0.959203	0.867734	1.01161	0.941288	1.07501	1.01939	1.01123	1.0275	0.977978	0.986723	1.03355	1.00901	1.04745	1.00494	0.982239	1.02835	1.02661	1.02487	1.01776	1.01075	0.976123	1.00665	1.03915	1.07382	0.980478	0.990927	1.0016	1.01251	1.02366	0.98989	1.01668	1.04496	1.13781	1.1897	1.23609	1.30313	1.37787	1.44885	1.45546	1.43578	1.34912	1.33604
1.20967	1.20567	1.2039	1.15575	1.1773	1.11684	1.16332	1.18827	1.13705	1.18641	1.05424	1.07829	1.14628	1.1691	1.14197	1.07317	1.1676	1.08538	1.20449	1.0886	1.09665	1.11219	1.08318	1.05564	1.16644	1.13625	1.17908	1.18582	1.19264	1.19954	1.20652	1.19441	1.18189	1.12326	1.12896	1.22892	1.14552	1.15612	1.1673	1.1787	1.22011	1.20221	1.25326	1.27277	1.38658	1.29825	1.44097	1.44756	1.45421	1.45173
1.3978	1.33863	1.30535	1.28084	1.28061	1.25905	1.24984	1.24076	1.20986	1.22798	1.22788	1.22779	1.21213	1.19688	1.17767	1.16432	1.17007	1.13756	1.12006	1.12391	1.11286	1.10647	1.10948	1.09467	1.08025	1.0662	1.04918	1.04856	1.04795	1.04733	1.04672	1.03589	1.06172	1.04454	1.03433	1.02431	1.01898	1.01371	1.00849	1.00332	0.998208	0.993146	0.988135	0.988571	0.996373	1.0043	1.01235	1.01907	1.02588	1.03278
1.0567	1.04299	1.01091	1.02026	0.976898	0.996963	0.979843	1.0047	0.987968	0.972116	0.972622	0.960453	0.917479	0.922276	0.915467	0.929749	0.918321	0.913919	0.913901	0.839568	0.868962	0.887203	0.901915	0.866434	0.887233	0.876697	0.866407	0.855362	0.844596	0.834096	0.843967	0.765988	0.811622	0.796467	0.816111	0.770595	0.795361	0.821772	0.797194	0.774043	0.827754	0.866225	0.953646	1.00304	1.07795	1.04876	0.973955	0.926852	0.884094	0.845108
	1.3099	1.27938	1.21812	1.14657	1.29876	1.28963	1.28063	1.25804	1.26773	1.27758	1.28894	1.27781	1.31136	1.39976	1.32832	1.30198	1.28122	1.24414	1.38822	1.35106	1.32939	1.27813	1.2734	1.29712	1.24824	1.28443	1.32651	1.35283	1.26862	1.309	1.31342	1.30155	1.43009	1.38664	2.59321	1.27534	1.45627	1.47572	1.54834	1.76019	2.03921	1.57863	1.74546	1.83492	1.8056	1.87168	1.69652	1.65825	1.50846
	0.688413	0.687392	0.696054	0.731543	0.734794	0.748294	0.750328	0.749145	0.72526	0.745681	0.714355	0.754418	0.700575	0.726641	0.735135	0.751109	0.772275	0.776741	0.790739	0.806615	0.855093	0.831063	0.852913	0.856344	0.871133	0.889776	0.899709	0.914524	0.938829	0.923436	0.917535	0.868061	0.86947	0.828119	0.82117	0.826533	0.828813	0.842383	0.848054	0.933655	0.958354	0.978198	0.947801	0.962733	0.990559	1.05303	1.01497	0.952056	1.00307
	1.27895	1.2383	1.2313	1.25365	1.22726	1.29851	1.29201	1.25145	1.28821	1.27667	1.25825	1.26662	1.2639	1.26519	1.27538	1.28574	1.29626	1.31558	1.33548	1.39384	1.41459	1.48668	1.50341	1.53413	1.54539	1.50276	1.45953	1.50573	1.53884	1.57084	1.56805	1.56528	1.53939	1.49775	1.72003	1.46384	1.55121	1.49878	1.50793	1.57405	1.6254	1.70899	1.73357	1.80538	1.78865	1.83197	1.83686	1.84199	1.79143
	1.16171	1.1586	1.1422	1.17571	1.18973	1.17221	1.15519	1.13867	1.21231	1.2101	1.15503	1.14135	1.19099	1.19551	1.10782	1.18723	1.18596	1.17376	1.1618	1.15133	1.13892	1.17958	1.17131	1.17448	1.17142	1.16838	1.15678	1.14541	1.13426	1.12333	1.1126	1.1263	1.14033	1.15473	1.13608	1.12779	1.11961	1.14746	1.11969	1.19755	1.28704	1.30483	1.32311	1.34191	1.39532	1.42487	1.4557	1.47503	1.49489
	1.68815	1.47087	1.4664	1.40043	1.4491	1.47001	1.34156	1.38891	1.3331	1.28161	1.3059	1.28033	1.20881	1.23104	1.20389	1.17791	1.15298	1.2424	1.20676	1.23272	1.25981	1.29969	1.35587	1.41713	1.48419	1.55791	1.48181	1.50227	1.58857	1.60321	1.48704	1.54411	1.43876	1.62038	1.64448	1.42925	1.52503	1.49826	1.55197	1.5433	1.53472	1.54644	1.47291	1.5188	1.40218	1.43278	1.46476	1.49819	1.43546
																1.48201	1.3965	1.32032	1.25202	1.26546	1.27919	1.29323	1.30757	1.32224	1.33723	1.35258	1.36828	1.4336	1.42669	1.43239	1.4419	1.40986	1.47467	1.489	1.66458	1.34444	1.43431	1.38253	1.45095	1.46607	1.57168	1.66297	1.73543	1.71856	1.78518	1.87159	1.83391	1.80599	1.77683
																						1.3943	1.29429	1.30278	1.31787	1.30113	1.2848	1.26888	1.25335	1.2382	1.2234	1.20896	1.19485	1.18107	1.15871	1.12132	1.1461	1.11859	1.13756	1.18671	1.16785	1.21463	1.26531	1.28161	1.31701	1.35443	1.34173	1.29397	1.30494

Tx dose: 100ng INS
1.11469	1.08918	1.08792	1.10318	1.06179	1.04881	1.02201	1.01793	1.01257	1.00234	1.01334	0.993948	0.997155	0.972577	0.983426	0.979601	0.997794	1.01982	1.01107	1.0226	1.0189	1.02138	1.02048	1.05015	1.03327	1.04174	1.03366	1.04243	1.06136	1.0702	1.06651	1.10624	1.09471	1.12286	1.08211	1.04848	1.01292	1.00982	0.959004	0.925686	0.988453	1.04948	1.13176	1.20427	1.2663	1.27584	1.27185	1.22735	1.21831	1.19701
1.65698	1.66026	1.61495	1.64294	1.56355	1.55093	1.55401	1.5614	1.57235	1.63034	1.59446	1.58483	1.55062	1.56266	1.59649	1.5516	1.58877	1.60742	1.5591	1.54541	1.5512	1.54706	1.53996	1.57205	1.529	1.50838	1.48793	1.4459	1.46199	1.51368	1.5099	1.4693	1.50695	1.44575	1.50693	2.12974	1.29277	1.4371	1.4118	1.4977	1.65732	0.938692	0.887199	1.05316	1.13188	1.22887	1.34567	1.48699	1.30934	1.40157
1.23378	1.2203	1.2264	1.20284	1.22831	1.26651	1.2784	1.3219	1.29088	1.31894	1.2674	1.27679	1.32138	1.31662	1.30926	1.38212	1.351	1.35554	1.25747	1.28261	1.31622	1.34898	1.30373	1.32508	1.37369	1.43394	1.41579	1.42197	1.40545	1.38995	1.41613	1.41005	1.39254	1.42975	1.44786	1.57739	1.50866	1.6701	1.67028	1.68737	1.66909	1.78001	1.73638	1.91571	2.00283	2.02639	2.00717	1.85152	1.83132	1.95063
1.38551	1.41462	1.42435	1.39251	1.40149	1.38698	1.4074	1.3867	1.39323	1.3882	1.40334	1.45884	1.46484	1.51998	1.44295	1.42717	1.43274	1.38858	1.38905	1.38609	1.37264	1.38846	1.35863	1.34508	1.34206	1.31137	1.35244	1.37133	1.33966	1.35017	1.34906	1.30392	1.28251	1.25409	1.26859	1.35045	1.24274	1.27709	1.23829	1.20628	1.25782	1.29405	1.36647	1.41753	1.50097	1.52428	1.6122	1.63667	1.66301	1.61949
0.995431	0.985391	0.990213	1.0114	0.989032	0.997733	1.03082	1.03898	1.0231	1.05158	1.02975	1.04919	1.05637	1.0503	1.00659	0.989543	0.959499	0.939347	0.927442	0.911368	0.918121	0.883773	0.858637	0.886348	0.88832	0.898952	0.891524	0.881877	0.883813	0.909507	0.941822	0.963468	0.947327	0.928144	0.889426	0.864789	0.875502	0.8557	0.856483	0.874561	0.92167	0.98902	1.00972	1.03344	1.06322	1.0657	1.08942	1.09478	1.1191	1.09898
1.55142	1.54651	1.55321	1.58504	1.57402	1.60215	1.54073	1.62495	1.5519	1.57547	1.55583	1.51621	1.49026	1.49662	1.43239	1.46623	1.46429	1.50246	1.5401	1.49932	1.44506	1.56435	1.52219	1.52049	1.51176	1.44785	1.44409	1.433	1.40178	1.33842	1.33567	1.2968	1.33966	1.32625	1.29999	1.37824	1.23	1.29588	1.29491	1.29369	1.34766	1.40504	1.42468	1.42826	1.4962	1.58082	1.63589	1.6953	1.6814	1.75316
1.15197	1.1366	1.13079	1.10716	1.10248	1.11803	1.09414	1.09095	1.08779	1.13199	1.11055	1.10057	1.08053	1.03651	1.0817	1.10915	1.09091	1.08063	1.06686	1.02313	1.09653	1.12452	1.1695	1.18339	1.17479	1.183	1.21102	1.2596	1.29055	1.30393	1.4118	1.29484	1.30143	1.25118	1.29712	1.50476	1.18404	1.25252	1.25729	1.26636	1.29796	1.4241	1.57741	1.59339	1.60739	1.64506	1.60642	1.63247	1.62872	1.55875
1.22453	1.20621	1.29596	1.32493	1.35595	1.33426	1.33281	1.38139	1.35895	1.36309	1.31761	1.32302	1.35524	1.33985	1.42767	1.43237	1.40847	1.4288	1.45113	1.4432	1.45542	1.46773	1.40438	1.40493	1.31908	1.36998	1.32451	1.39078	1.44375	1.40729	1.48576	1.41505	1.39473	1.40281	1.52885	1.86338	1.55632	1.74298	2.13556	1.53785	1.63343	1.65963	1.76474	1.83673	1.85578	1.75029	1.73828	1.72272	1.76123	1.80068
1.24251	1.29468	1.29991	1.28974	1.23697	1.22007	1.23148	1.15258	1.19096	1.28652	1.30355	1.32103	1.35133	1.35511	1.40529	1.46434	1.1622	1.47022	1.67492	1.54918	1.64573	1.68392	1.73399	1.71769	1.61095	1.62897	1.6564	1.61021	1.63786	1.67103	1.62194	1.59512	1.4971	1.55327	1.51017	1.60358	1.36696	1.44063	1.46237	1.42941	1.40254	1.47006	1.55902	1.60027	1.64835	1.64509	1.61787	1.62883	1.6933	1.6842
1.19402	1.16324	1.21163	1.1815	1.25478	1.3367	1.20033	1.15498	1.1817	1.20193	1.31013	1.24336	1.32568	1.40045	1.35465	1.37101	1.3896	1.41181	1.42489	1.48758	1.57215	1.61689	1.57681	1.57889	1.63942	1.63511	1.67849	1.74345	1.78736	1.76935	1.76269	1.81097	1.83196	1.83004	1.88464	2.36514	1.64998	1.83075	1.83926	1.83321	1.86494	1.8381	1.9757	1.9422	1.98678	2.07946	2.05411	2.04617	2.14125	2.09211
1.67087	1.6575	1.6632	1.59739	1.56936	1.52383	1.53763	1.55027	1.56926	1.57733	1.5712	1.59352	1.54592	1.55053	1.59384	1.57429	1.56624	1.61081	1.59625	1.5696	1.53456	1.53871	1.47823	1.46759	1.4786	1.41258	1.40839	1.36356	1.34596	1.33908	1.33292	1.3542	1.34262	1.33685	1.30858	1.39195	1.30997	1.32174	1.3	1.23291	1.29917	1.38435	1.41399	1.4971	1.60999	1.70836	1.7473	1.73271	1.68249	1.68412
1.73518	1.73191	1.66779	1.66143	1.55661	1.54435	1.52021	1.72289	1.68238	1.70644	1.95469	1.63849	1.55836	1.46413	2.41437	2.30706	2.52717	2.70766	2.36357	2.4179	2.25168	2.1267	2.0368	2.02112	2.65431	2.65997	2.8308	2.81934	2.95007	2.74308	3.18439	4.28861	3.39684	3.29577	1.87405	5.02251	2.25908	1.45727	1.48131	1.50616	1.51373	1.42552	1.58772	1.55359	1.64235	1.66777	1.62743	2.86773	3.85853	4.24953
1.1338	1.14767	1.17013	1.07809	1.05695	1.0928	1.01717	1.07501	1.04189	0.954884	0.973591	0.969749	0.928131	0.938978	0.942727	0.941599	0.926618	0.919238	0.92532	0.915923	0.906716	0.888003	0.90057	0.907969	0.914065	0.934214	0.929781	0.947317	0.932396	0.963346	0.960748	0.976458	0.990877	1.0151	1.0283	1.04161	1.04416	1.05212	1.05145	1.07332	1.01531	1.07155	1.05359	1.09577	1.07206	1.10005	1.10916	1.08687	1.0832	1.08266
0.889984	0.921592	0.92883	0.924621	0.941875	1.01206	1.01361	1.02854	1.00234	1.0604	1.01446	1.01739	1.05305	1.0753	1.093	1.07937	1.08497	1.13262	1.15195	1.10083	1.07737	1.16979	1.12463	1.14143	1.21383	1.19904	1.16904	1.21137	1.21343	1.22174	1.21975	1.23984	1.29965	1.2742	1.23263	1.2821	1.15094	1.20362	1.17085	1.20653	1.20037	1.16594	1.19079	1.21672	1.19771	1.24177	1.2586	1.27589	1.23298	1.26183
1.94358	2.08512	1.9716	1.92667	1.85904	2.01421	1.90792	1.86341	1.74585	1.7853	1.77931	1.7925	1.6766	1.76631	1.71781	1.71507	1.64286	1.69526	1.66323	1.67685	1.69632	1.6368	1.59892	1.63359	1.64057	1.63214	1.59147	1.54376	1.61758	1.55968	1.59377	1.63837	1.61028	1.57842	1.63826	2.36317	1.43227	1.68714	1.67067	1.6679	1.7027	1.7345	1.76243	1.923	1.82716	1.85633	1.89876	1.91757	1.93675	2.02158
1.40255	1.42981	1.4902	1.49441	1.46981	1.45071	1.42613	1.40672	1.41518	1.44725	1.48799	1.44566	1.44307	1.45837	1.43585	1.43252	1.45599	1.39968	1.40048	1.35949	1.3762	1.37083	1.3794	1.3849	1.38947	1.42208	1.40792	1.4393	1.45382	1.49795	1.48474	1.45143	1.40393	1.37323	1.38424	1.4549	1.37214	1.42141	1.40876	1.37498	1.39086	1.4943	1.54649	1.6588	1.70941	1.75131	1.75476	1.73513	1.71709	1.59471
1.35602	1.34504	1.27041	1.28744	1.3241	1.32269	1.33621	1.36111	1.42215	1.41022	1.43601	1.44654	1.48713	1.44241	1.42414	1.52677	1.45816	1.49507	1.44747	1.48893	1.44485	1.40775	1.46143	1.45523	1.50058	1.43719	1.41708	1.43582	1.49451	1.51139	1.54864	1.5359	1.57387	1.55436	1.54742	1.85483	1.45445	1.82275	1.05846	1.07537	1.09283	1.13084	1.17159	1.18706	1.34466	1.53463	1.61983	1.9049	2.03685	2.17966
1.79744	1.70303	1.70944	1.69192	1.64558	1.6748	1.67535	1.6918	1.67169	1.63767	1.60383	1.60858	1.59865	1.61192	1.59231	1.63644	1.5785	1.56231	1.5682	1.5755	1.56188	1.60827	1.60516	1.61373	1.63713	1.70885	1.71919	1.70639	1.74431	1.76192	1.80383	1.78153	1.76103	1.82674	1.83506	2.28909	1.64625	1.83771	1.82765	1.85232	1.86501	1.86985	1.9365	1.84005	1.93316	1.91413	1.93103	2.00546	2.05427	2.03329
1.31637	1.31485	1.31332	1.28475	1.72944	1.37825	1.36537	1.39708	1.41499	1.43337	1.33475	1.23669	1.17157	1.19057	1.11965	1.18292	1.06753	1.17492	1.24778	1.05674	0.937338	0.941156	0.945005	1.08844	1.02209	1.16898	1.04941	1.14825	1.26766	1.26871	1.38425	1.43632	1.49246	1.51295	1.57783	2.12058	1.80333	1.56864	1.60357	1.64008	1.63757	1.58083	1.69316	1.6776	1.67957	1.76096	1.62056	1.70364	1.72585	1.71587
1.55802	1.51892	1.48458	1.43374	1.42831	1.45958	1.46781	1.46453	1.45639	1.41757	1.39115	1.33924	1.32935	1.27512	1.28729	1.2759	1.32284	1.36311	1.31474	1.34759	1.31091	1.28007	1.27537	1.27863	1.3129	1.29149	1.33243	1.38825	1.37801	1.41788	1.3698	1.36987	1.32877	1.34599	1.38627	1.46687	1.33814	1.4353	1.51652	1.49311	1.60857	1.70772	1.78082	1.80465	1.82469	1.88622	1.80999	1.8258	1.80094	1.7669
1.11252	1.08391	1.11302	1.08479	1.12267	1.10755	1.15482	1.12647	1.13773	1.10621	1.12339	1.10867	1.10047	1.13229	1.15559	1.1784	1.21764	1.21464	1.24217	1.23598	1.23364	1.2586	1.29085	1.32377	1.39758	1.53054	1.5997	0.782418	0.801503	0.899597	1.02505	0.985742	0.949336	0.915525	1.01096	1.05946	1.19063	1.36184	1.61235	1.69305	1.76293	1.73864	1.79433	1.8329	1.76874	1.71699	1.62041	1.60132	1.5705	1.52136
1.59422	1.65853	1.68297	1.71077	1.72892	1.75595	1.78383	1.81261	1.84234	1.87306	1.90482	1.92156	1.9009	1.96579	2.11757	2.20234	2.2561	2.29576	2.32651	2.38599	2.41143	2.36031	2.54382	2.42594	2.56428	2.49094	3.02433	2.57085	2.61629	3.06416	2.13435	2.48625	2.17267	2.60197	2.27916	2.20032	2.12676	2.05795	1.99346	1.93288	2.09377	2.14735	2.05087	2.27697	2.3036	2.23168	2.34037	2.22309	2.12505	2.04996
0.88904	0.847248	0.872189	0.872622	0.871051	0.849599	0.882169	0.880452	0.871591	0.865257	0.883943	0.859342	0.860963	0.898529	0.888743	0.876504	0.895655	0.885964	0.887569	0.903919	0.883018	0.881994	0.890139	0.874912	0.893855	0.904316	0.888648	0.938926	0.963165	0.940856	0.899165	0.951109	0.95158	0.927801	0.929149	0.938559	0.945045	0.949244	0.973911	0.973369	1.03148	1.094	1.15789	1.14617	1.12716	1.15472	1.14881	1.13743	1.15295	1.1448
1.10695	1.11758	1.11061	1.14192	1.16351	1.16878	1.14672	1.16162	1.16056	1.13567	1.0848	1.08775	1.10706	1.07501	1.07734	1.06347	1.08615	1.05872	1.05987	1.06753	1.07073	1.08845	1.08488	1.08005	1.05525	1.0378	0.997175	1.00513	1.05213	1.08211	1.08644	1.09126	1.08967	1.07368	1.05768	1.03527	0.995968	0.968676	0.920692	0.897167	0.936174	1.01471	1.05728	1.1353	1.1787	1.17619	1.18804	1.16707	1.16242	1.13545
1.34837	1.31196	1.31577	1.31449	1.30109	1.26508	1.28524	1.28124	1.26157	1.27101	1.24043	1.27114	1.24343	1.28366	1.27122	1.28333	1.25911	1.27229	1.23659	1.23301	1.25139	1.29404	1.29056	1.28333	1.31118	1.28113	1.31493	1.32009	1.35141	1.35209	1.34672	1.32666	1.35341	1.3438	1.30056	1.3958	1.28629	1.33668	1.30072	1.28314	1.34188	1.35261	1.35636	1.39349	1.42938	1.42464	1.44041	1.38977	1.40806	1.35123
1.28416	1.29575	1.28768	1.2404	1.24262	1.31164	1.3501	1.31947	1.31273	1.3011	1.35183	1.30466	1.31272	1.3685	1.36899	1.26195	1.31991	1.36238	1.30035	1.35705	1.32181	1.348	1.35684	1.33015	1.31727	1.3727	1.30509	1.41572	1.34752	1.31946	1.3561	1.31681	1.33277	1.28327	1.2946	1.30614	1.31788	1.41101	1.42452	1.4581	1.46983	1.48175	1.55986	1.64667	1.6434	1.6655	1.64524	1.67464	1.70116	1.68061
0.841823	0.882973	0.871149	0.869387	0.812539	0.841306	0.88509	0.928857	0.917933	0.961705	0.971232	0.984365	1.01713	0.979104	1.01298	1.01926	1.00278	1.04123	1.06288	1.04426	1.06609	1.06813	1.10972	1.12491	1.14224	1.1575	1.19488	1.21755	1.23393	1.24623	1.27606	1.30411	1.3084	1.25528	1.2063	1.23753	1.14662	1.19519	1.2097	1.22022	1.23272	1.23565	1.3035	1.31561	1.29846	1.32716	1.33411	1.30638	1.27355	1.26924
1.22138	1.15857	1.20413	1.16646	1.24458	1.27109	1.29469	1.31808	1.33566	1.29053	1.25135	1.33606	1.30995	1.36162	1.3441	1.32264	1.35529	1.31054	1.37559	1.41943	1.39239	1.39378	1.40311	1.4192	1.44635	1.47165	1.43699	1.47859	1.49774	1.54625	1.51432	1.53789	1.58979	1.52562	1.53973	1.70004	1.47226	1.56325	1.53852	1.51255	1.52107	1.60892	1.73153	1.8043	1.88346	1.91635	2.02249	2.01938	1.94834	1.92455
1.05627	1.08265	1.09768	1.0762	1.10752	1.10092	1.1416	1.11707	1.14354	1.18141	1.18106	1.17099	1.20125	1.18534	1.13892	1.07298	1.04618	1.01994	0.945854	0.944804	0.929982	0.902081	0.910122	0.936686	0.945802	0.956067	0.992066	0.994467	1.04105	1.03288	1.05906	1.02845	1.00594	1.02236	1.03234	1.0157	1.01374	0.993195	1.01539	0.98614	1.02807	1.09735	1.16492	1.21827	1.22379	1.21443	1.25886	1.19773	1.21221	1.20823
1.25787	1.25289	1.30293	1.34965	1.36198	1.34335	1.37255	1.35781	1.36851	1.38571	1.43763	1.42046	1.43775	1.44507	1.41009	1.44414	1.4855	1.47862	1.59094	1.56307	1.61741	1.57958	1.60025	1.56999	1.65058	1.63985	1.60627	1.62834	1.73765	1.74568	1.70581	1.7595	1.74195	1.76783	1.72774	1.93085	1.59076	1.70697	1.72179	1.78896	1.78911	1.80351	1.84257	1.83986	1.84687	1.85286	1.82238	1.84452	1.83542	1.86968
1.1633	1.14226	1.15831	1.17006	1.18991	1.18269	1.2213	1.20781	1.23591	1.22118	1.18216	1.1987	1.18613	1.17474	1.17566	1.16434	1.15939	1.15931	1.14416	1.13941	1.11218	1.14279	1.18166	1.16486	1.17978	1.19056	1.2038	1.24618	1.26804	1.28504	1.32212	1.35345	1.31424	1.30049	1.28242	1.29345	1.24296	1.2488	1.28483	1.28111	1.27015	1.3455	1.3243	1.3581	1.32851	1.41688	1.42868	1.43922	1.40088	1.43672
1.21105	1.28044	1.25742	1.26377	1.26073	1.25672	1.23629	1.21766	1.2379	1.21452	1.27015	1.28997	1.28776	1.28077	1.27343	1.313	1.2922	1.31253	1.27661	1.29271	1.33255	1.33198	1.32854	1.35929	1.39249	1.42735	1.41875	1.46109	1.46866	1.50473	1.54261	1.57009	1.51589	1.44558	1.40906	1.53975	1.34007	1.36741	1.39589	1.42557	1.50751	1.55676	1.55081	1.59825	1.64444	1.68872	1.71767	1.72505	1.70538	1.67282
1.25827	1.20169	1.23494	1.20089	1.23978	1.27123	1.2616	1.25127	1.22447	1.23875	1.23234	1.2556	1.23563	1.22898	1.21727	1.30456	1.33131	1.30778	1.3547	1.35553	1.45424	1.50215	1.52361	1.53814	1.54292	1.58983	1.55549	1.5292	1.52874	1.4973	1.49895	1.50194	1.54633	1.62086	1.59868	2.35348	1.42169	1.62794	1.65149	1.68491	1.71972	1.88912	1.86188	1.90016	1.92484	1.91377	1.84565	1.86853	1.86321	1.81639
0.956732	0.973043	0.950983	0.95247	0.955291	0.987865	1.00833	0.973284	0.992119	1.00876	1.03712	1.0112	0.995342	1.04309	1.05083	1.0623	1.02538	1.06599	1.06525	1.06148	1.06805	1.12934	1.15704	1.20625	1.24331	1.26859	1.32667	1.31939	1.33139	1.30721	1.42096	1.42474	1.42855	1.49243	1.49148	1.91541	1.30179	1.41159	1.39873	1.44186	1.48774	1.53663	1.65111	1.69734	1.72676	1.71251	1.75886	1.68598	1.69593	1.63791

1.28628	1.26618	1.25141	1.21726	1.21216	1.20711	1.2021	1.19713	1.19221	1.2065	1.22115	1.20895	1.19699	1.18527	1.19884	1.21272	1.22693	1.24148	1.25637	1.27163	1.28726	1.30306	1.31926	1.31887	1.31847	1.31808	1.31769	1.17024	1.24715	1.22445	1.19034	1.12108	1.11951	1.11795	1.11639	1.11484	1.08514	1.07858	1.07209	1.0821	1.09229	1.07137	1.15145	1.15721	1.16735	1.17688	1.21348	1.2155	1.22496	1.23152
0.801421	0.858344	0.923972	1.06942	1.11861	1.12916	1.13991	1.13211	1.1734	1.12418	1.08867	1.09655	1.03147	1.06409	1.01334	1.05171	1.01891	1.02074	1.04815	1.10313	0.997169	1.02273	1.14151	1.05541	0.990032	1.18026	1.01564	1.1487	1.17038	1.2096	1.00033	1.01839	0.996307	1.07885	1.09615	1.00925	1.04165	1.09119	1.15604	1.145	1.26689	1.43622	1.3695	1.34726	1.32741	1.30815	1.34352	1.31515	1.34548	1.41975
1.29142	1.2468	1.24526	1.16226	1.23791	1.19545	1.24377	1.23762	1.25049	1.26518	1.23952	1.21487	1.2432	1.1744	1.18277	1.19125	1.19062	1.31233	1.18628	1.20799	1.30681	1.14746	1.13302	1.26027	1.26474	1.26924	1.2601	1.16742	1.17833	1.18944	1.20077	1.21814	1.17392	1.1914	1.16348	1.16688	1.10873	1.14285	1.11499	1.11869	1.12241	1.10489	1.04283	1.07244	1.10379	1.11062	1.08047	1.08543	1.10747	1.09471
0.94965	0.996003	1.10081	1.11539	1.12375	1.15623	1.10748	1.01269	0.997607	0.993679	0.955676	0.94495	0.940204	0.97002	0.998466	1.02743	1.02182	1.03322	1.05109	0.979121	1.03426	0.988108	0.9588	0.958033	0.936968	0.942047	0.919417	0.968441	0.986695	1.05065	1.04936	1.11847	1.11821	1.14692	1.20143	1.3749	1.27259	1.39274	1.42892	1.43975	1.39944	1.5185	1.55548	1.59669	1.59076	1.60658	1.61542	1.60442	1.61787	1.59838
0.865974	1.03149	1.043	0.962021	0.916113	1.07465	1.06944	1.09039	1.08871	1.18419	1.18639	1.04903	1.11161	1.10319	1.12267	1.06558	1.08464	1.04395	1.10033	1.08114	1.08133	1.10915	1.10642	1.19065	1.18836	1.22635	1.17615	1.26082	1.29181	1.2242	1.3307	1.36904	1.39968	1.37322	1.33583	1.37516	1.41689	1.46122	1.5143	1.57231	1.51224	1.51654	1.55977	1.53463	1.58621	1.64138	1.65875	1.67649	1.67068	1.6965
1.17806	1.2588	1.34237	1.41979	1.4458	1.47277	1.53795	1.53443	1.59217	1.49844	1.37549	1.46329	1.48719	1.50162	1.44228	1.48338	1.54985	1.55798	1.56102	1.55436	1.61125	1.67638	1.71097	1.69824	1.76382	1.60812	1.63559	1.58418	1.57969	1.58886	1.51249	1.5283	1.60091	1.62514	1.60814	1.76919	1.39166	1.70695	1.72973	1.70846	1.62799	1.66037	1.74807	1.75271	1.81692	1.7837	1.86489	1.7164	1.78689	1.68539
1.02406	0.952592	1.12367	1.0895	1.02087	1.02773	1.02819	1.10067	1.04172	1.05211	1.0747	1.09409	1.05389	1.09523	1.11887	1.10801	1.14309	1.20321	1.14144	1.12644	1.14743	1.20761	1.18414	1.1887	1.26323	1.25405	1.26517	1.21839	1.27688	1.29317	1.29634	1.40055	1.41379	1.42928	1.43627	3.87123	1.21474	1.34888	1.39974	1.33768	1.32474	1.30019	1.30364	1.36085	1.35939	1.35793	1.41602	1.47931	1.42991	1.41525
1.18594	1.16709	1.13851	1.11442	1.10596	1.10481	1.11941	1.11817	1.20297	1.1347	1.18853	1.19972	1.1275	1.16551	1.14973	1.17953	1.24623	1.11852	1.17315	1.13768	1.11947	1.1591	1.14339	1.12835	1.1137	1.04402	1.06712	1.11823	1.05537	1.06787	1.0794	1.07296	1.05638	1.04031	1.02472	1.16812	1.10279	1.09789	1.10042	1.10297	1.12039	1.13836	1.15693	1.21964	1.09468	1.10185	1.10912	1.11578	1.06461	1.04855
																																					1.44051	1.44443	1.50501	1.45447	1.48774	1.52257	1.55908	1.69037	1.6394	1.59141	1.6167	1.65785	1.70114
1.33682	1.35837	1.2204	1.16682	1.31264	1.25569	1.29428	1.3547	1.18221	1.15502	1.07662	1.15275	1.07458	1.09381	1.17124	1.15631	1.07029	1.19455	1.12098	1.306	0.913082	0.841383	0.90349	0.975497	1.02527	0.96589	0.894547	1.09851	1.2447	1.29821	1.29953	1.28135	1.27769	1.30172	1.38515	1.35056	1.20439	1.22333	1.26426	1.20308	1.28331	1.37274	1.37005	1.45463	1.55713	1.76391	1.75317	1.96611	2.23793	1.98901
																																													1.25235	1.29156	1.31411	1.33116	1.33387
						0.983019	0.989001	0.995055	1.00118	1.00739	1.01367	1.02003	0.967579	0.986217	1.00559	1.02573	1.0467	1.02421	1.00267	1.00291	1.00315	1.00339	1.02989	1.04592	1.06245	1.08226	1.10282	1.05152	1.1039	1.04957	1.07226	1.02581	1.05949	1.06445	1.01929	1.02304	1.1031	1.06398	1.07739	1.12279	1.17772	1.23676	1.27234	1.35345	1.4245	1.50433	1.41985	1.45655	1.44325
																																		1.59882	1.5784	1.5585	1.72945	1.75797	1.78016	1.85849	1.88842	1.91933	1.88704	1.98083	1.96599	1.99583	2.07008	2.05561	2.05998
																1.56001	1.55209	1.54425	1.51556	1.66685	1.5412	1.59891	1.56004	1.5942	1.60018	1.61064	1.57966	1.57723	1.5702	1.571	1.59348	1.72234	1.62592	1.65577	2.08201	1.52457	1.69802	1.72812	1.73541	1.76758	1.86762	1.89815	2.05255	2.01878	2.08275	2.15091	2.22368	2.12848	2.10675
																																							1.60302	1.60461	1.67139	1.55647	1.52026	1.33838	1.41314	1.37631	1.45732	1.45614	1.45496
																																					2.07233	2.0869	2.10167	2.11666	2.13187	2.14729	2.16294	2.17881	2.14071	2.10391	2.06836	2.03399	2.00074
																																															1.3903	1.6012	1.74281
																																													2.1796	2.22157	2.15949	2.13828	2.11748
																																												1.15649	1.46072	1.64635	1.80682	1.80636	2.13584
1.18915	1.15996	1.18119	1.15908	1.21658	1.24421	1.2434	1.27937	1.33043	1.34086	1.34998	1.38556	1.36133	1.40964	1.35467	1.34054	1.32375	1.32848	1.34375	1.32768	1.32431	1.30871	1.33037	1.30804	1.3004	1.32276	1.31516	1.32966	1.33629	1.34426	1.3652	1.37411	1.39414	1.4295	1.41325	1.454	1.3413	1.36056	1.3179	1.21478	1.21704	1.22834	1.29256	1.28119	1.34474	1.38529	1.40737	1.44458	1.44967	1.44393
1.16078	1.16228	1.10929	1.07327	1.04472	0.992113	0.984759	1.02536	1.04673	1.05043	1.02921	1.07864	1.04458	1.07519	1.07889	1.09454	1.07928	1.06152	1.09313	1.06238	1.05413	1.05552	1.08953	1.04753	1.05187	1.10694	1.01376	1.07621	1.01749	1.02359	1.04131	1.03912	1.03049	0.998532	1.03003	1.03447	1.03346	1.03573	0.998745	0.973615	1.01381	1.03604	1.10368	1.11976	1.18433	1.25085	1.2731	1.46072	1.53726	1.64506
1.44007	1.43861	1.39639	1.37811	1.35914	1.35281	1.37541	1.42505	1.45012	1.45688	1.54702	1.4748	1.5383	1.54198	1.52084	1.54408	1.56589	1.58119	1.56041	1.54387	1.5697	1.59104	1.55991	1.61133	1.56493	1.53339	1.51174	1.48555	1.47002	1.46611	1.48698	1.51907	1.50666	1.55259	1.5126	1.57882	1.44817	1.4941	1.50939	1.53544	1.5846	1.59652	1.69021	1.72424	1.81679	1.82448	1.8306	1.82714	1.84656	1.82533
1.10829	1.09681	1.09365	1.11306	1.11967	1.11347	1.1432	1.13371	1.18486	1.17859	1.21938	1.26268	1.26225	1.31823	1.30983	1.32925	1.35705	1.43538	1.43104	1.4864	1.48128	1.49022	1.54725	1.53815	1.52961	1.5691	1.58502	1.58233	1.59618	1.59189	1.64014	1.71053	1.65922	1.6435	1.67668	1.98508	1.62356	1.76569	1.70378	1.68629	1.7667	1.86478	1.87089	1.86454	1.8943	1.90001	1.95534	1.95954	2.00188	1.9707
1.40543	1.36777	1.40953	1.46092	1.80797	1.80859	1.66777	1.56079	1.5655	1.58695	1.38961	1.33871	1.43135	1.3695	1.53487	1.57507	1.44761	1.42806	1.59872	1.64085	1.42006	1.63108	1.51528	1.54741	1.70126	1.63994	1.57728	1.609	1.57717	1.6081	1.57025	1.58061	1.59056	1.56165	1.48892	1.64268	1.50337	1.56717	1.86553	1.51012	1.80432	1.95274	2.00727	1.90806	1.95415	1.90338	1.93921	1.92265	1.96375	1.90759
1.3313	1.36936	1.3562	1.36343	1.39351	1.41986	1.46385	1.50239	1.4987	1.49649	1.54288	1.50842	1.52899	1.52856	1.51812	1.52697	1.53447	1.53445	1.51173	1.58097	1.58143	1.57677	1.57974	1.53916	1.50087	1.52287	1.51847	1.4901	1.53653	1.5507	1.59596	1.55003	1.58154	1.6142	1.64516	1.67732	1.53987	1.57302	1.58081	1.50305	1.52738	1.55251	1.53788	1.56593	1.54076	1.52027	1.54284	1.5685	1.57445	1.55075
2.0105	1.96648	1.87589	2.0027	1.96941	1.91221	1.89222	2.00866	2.14692	2.29356	2.27055	2.2994	2.26496	2.24792	2.39699	2.38731	2.38675	2.30779	2.16572	2.13642	2.16714	2.21831	2.05144	1.90647	1.78763	1.71081	1.71666	1.64311	1.65881	1.65046	1.59033	1.63594	1.62036	1.68961	1.69874	2.12837	1.65531	1.76037	1.70308	1.6457	1.60938	1.81914	1.78874	1.75934	1.85486	1.98118	2.00254	1.93847	1.92017	1.88357
1.50244	1.5015	1.51534	1.54387	1.54435	1.55909	1.58946	1.59908	1.60571	1.63712	1.62375	1.63076	1.64584	1.64409	1.65798	1.64086	1.61102	1.62679	1.61804	1.55545	1.54525	1.52613	1.52598	1.47148	1.49872	1.47245	1.44227	1.44713	1.44601	1.42674	1.40879	1.40131	1.35924	1.34459	1.31526	1.41563	1.33253	1.38684	1.40419	1.41965	1.50162	1.59363	1.69766	1.73051	1.81698	1.79911	1.76123	1.81764	1.81693	1.8618
2.27361	2.25149	2.26465	2.21995	2.25173	2.20203	2.28216	2.29572	2.22314	2.28556	2.189	2.175	2.07876	2.13278	2.10223	2.07472	2.08542	2.02643	1.987	1.9608	2.01014	1.92246	1.90635	1.89052	1.83704	1.83019	1.78949	1.85335	1.85072	1.88853	1.91614	1.88855	1.8862	1.85421	1.8408	1.99612	1.69763	1.79882	1.78594	1.7507	1.78153	1.80424	1.78053	1.75743	1.81832	1.80724	1.83701	1.84248	1.84799	1.78999
1.25129	1.29742	1.32503	1.31057	1.33027	1.32197	1.27597	1.19774	1.15372	1.12757	1.07534	1.10764	1.06856	1.05218	1.03275	1.00922	0.999603	0.977669	0.939653	0.924761	0.895235	0.895715	0.885606	0.890305	0.881075	0.893984	0.893435	0.876006	0.898558	0.89876	0.918632	0.912549	0.937455	0.916064	0.923721	0.897048	0.903261	0.909562	0.875209	0.868522	0.967401	1.02148	1.04265	1.0961	1.09312	1.07916	1.08097	1.02775	1.02828	1.0164
1.17136	1.20665	1.19585	1.18973	1.18483	1.21791	1.2575	1.2412	1.25911	1.20351	1.19625	1.23179	1.23398	1.24941	1.24483	1.25023	1.21917	1.24901	1.21033	1.20669	1.21857	1.21786	1.17325	1.18947	1.11721	1.1026	1.06802	1.07145	1.02319	1.00601	1.02774	0.993907	0.991282	0.98867	0.995224	0.96339	1.01299	1.03112	1.04724	1.04813	1.06654	1.15101	1.19701	1.19578	1.24235	1.21895	1.23642	1.21221	1.21582	1.15479
1.23699	1.22922	1.21957	1.23831	1.22298	1.23834	1.19031	1.1768	1.18937	1.14584	1.12954	1.12283	1.12138	1.11885	1.10952	1.13845	1.16617	1.17441	1.15923	1.1653	1.10686	1.1135	1.13821	1.1506	1.15565	1.17864	1.21097	1.19683	1.20533	1.24722	1.28	1.31293	1.3476	1.33301	1.34526	1.37884	1.28244	1.31216	1.28106	1.30507	1.38006	1.43147	1.39601	1.41303	1.51865	1.40281	1.38528	1.35381	1.39905	1.40092
1.46308	1.47763	1.48963	1.48039	1.47453	1.41858	1.46154	1.43662	1.41248	1.45916	1.52424	1.54645	1.58942	1.613	1.61514	1.71515	1.68957	1.71781	1.71893	1.75563	1.79515	1.7648	1.79317	1.84755	1.79961	1.81218	1.88562	1.82886	1.8058	1.78329	1.7774	1.78549	1.72922	1.78649	1.7995	1.98699	1.59367	1.71985	1.6898	1.6838	1.71151	1.7524	1.77737	1.81593	1.75393	1.85513	1.85328	1.84213	1.89126	1.93531
1.45113	1.39982	1.40332	1.36074	1.35836	1.42205	1.42316	1.39625	1.46322	1.46619	1.41929	1.39568	1.40914	1.37084	1.30224	1.35893	1.42529	1.46072	1.42929	1.43727	1.47616	1.43257	1.36552	1.43979	1.44655	1.53854	1.48551	1.5507	1.423	1.51472	1.40686	1.52565	1.40698	1.59182	1.79181	7.67264	1.39484	1.54371	1.44737	1.32121	1.91283	1.93701	1.63637	1.67826	1.72235	1.51149	1.52089	1.42034	1.46333	1.48482
1.36452	1.33664	1.42221	1.48592	1.43585	1.38424	1.32738	1.30022	1.19127	1.18987	1.05407	1.00448	0.990972	0.973501	0.99578	1.01048	0.991442	1.00581	0.927838	0.956446	0.960951	0.946047	0.830615	0.906588	1.37059	2.04533	3.02679	4.04857	4.28914	6.25996	6.16158	6.2255	6.00845	5.80602	7.53917	10.7474	2.90159	1.97852	3.98876	3.58607	7.34957	6.35821	5.65	4.14945	4.64885	3.80024	4.9523	5.77787	5.00449	6.71099
1.70955	1.7145	1.77162	1.75072	1.78842	1.82771	1.80862	1.84169	1.86216	1.89483	1.9563	1.92754	1.88828	1.84251	1.93425	1.93402	1.95821	1.90569	1.95089	1.90294	1.89122	1.84531	1.82314	1.86203	1.8488	1.81707	1.84627	1.8774	1.91347	1.91002	1.90659	1.96052	1.96488	1.9252	1.9037	2.22511	1.72833	1.87175	1.82538	1.83326	1.83398	1.94023	2.03311	2.0981	2.15772	2.17735	2.13605	2.15173	2.12913	2.12007
1.40594	1.42233	1.36753	1.39314	1.32294	1.28872	1.32095	1.3292	1.36953	1.31542	1.33843	1.33554	1.30193	1.27423	1.25996	1.28062	1.27256	1.30373	1.4145	1.38327	1.40512	1.44331	1.43351	1.48487	1.49675	1.5313	1.54051	1.61513	1.71037	1.73659	2.04005	1.44765	0.941612	1.00966	0.979012	0.97611	0.92953	0.89949	1.16847	1.27031	1.51183	1.73865	1.99316	2.1979	1.9564	1.93173	1.94866	1.87776	1.88091	1.79413
1.23104	1.27625	1.22862	1.16798	1.19942	1.23869	1.24891	1.25494	1.2522	1.21294	1.26481	1.25689	1.19782	1.21616	1.27444	1.29375	1.28223	1.28144	1.26375	1.28378	1.35081	1.37434	1.39971	1.40536	1.42319	1.43837	1.43921	1.45198	1.45209	1.41652	1.43377	1.41189	1.45073	1.43406	1.43731	1.51243	1.41746	1.48639	1.46673	1.37794	1.40048	1.47923	1.49394	1.51013	1.56363	1.58675	1.63813	1.69295	1.71005	1.75486
1.10537	1.18339	1.07827	1.0165	0.978938	0.991339	0.940802	0.916859	0.916937	0.935855	0.92131	0.93287	0.917891	0.948864	0.952111	0.984697	0.97769	0.984414	1.01889	1.05308	1.05461	1.05808	1.04572	1.02763	1.02319	1.05114	1.06258	1.0739	1.03871	1.07978	1.0778	1.06289	1.07841	1.10296	1.07745	1.11874	1.09303	1.11906	1.10646	1.12656	1.17389	1.22081	1.3112	1.29937	1.32321	1.34997	1.32791	1.32595	1.31039	1.3389
1.34824	1.33081	1.32276	1.3738	1.37994	1.34996	1.37077	1.27638	1.36266	1.41215	1.41756	1.4258	1.43413	1.40883	1.35414	1.40293	1.37643	1.40992	1.35334	1.33537	1.36011	1.36602	1.38329	1.35122	1.41147	1.42814	1.36609	1.3828	1.42503	1.47713	1.38874	1.43242	1.41143	1.47014	1.47645	1.96327	1.37269	1.48659	1.45677	1.52206	1.45706	1.48446	1.51372	1.59757	1.69126	1.79661	1.66716	1.70134	1.70784	1.59972
2.29866	1.9293	1.80762	1.90922	1.80387	1.73548	1.8657	1.89203	1.95277	2.02323	1.92418	1.79658	1.96174	1.87251	1.87044	2.1578	2.03062	1.91578	1.91468	1.87804	1.83596	2.07378	1.81222	2.3162	2.38959	2.37243	2.2915	2.28627	2.38995	2.17643	2.07137	2.41733	2.31999	2.22885	2.29044	2.72631	1.98713	2.33565	2.23843	2.3259	2.26475	2.39903	2.30366	2.43619	2.39933	2.30071	2.75951	2.38774	2.65402	2.39443
0.617836	0.706993	0.666348	0.571947	0.644356	0.617856	0.472379	0.538781	0.626905	0.749494	0.931679	1.02631	1.00826	1.11911	1.07145	1.02983	1.00648	0.934998	0.881336	0.84356	0.804237	0.780434	0.752581	0.753112	0.746987	0.733814	0.747054	0.735529	0.739179	0.760599	0.759263	0.780239	0.810809	0.823349	0.837835	0.845336	0.850494	0.829523	0.836294	0.860873	0.925572	0.99593	1.08703	1.19646	1.22937	1.26734	1.2631	1.25232	1.24293	1.23148
1.87753	1.94954	1.94351	2.01754	1.84369	1.93407	1.73722	1.68432	1.62687	1.71432	1.65928	1.69915	1.71297	1.5884	1.57865	1.56901	1.62607	1.68744	1.52751	1.55182	1.52594	1.53825	1.58203	1.51783	1.51824	1.51273	1.56684	1.51492	1.54257	1.55641	1.61191	1.68894	1.80754	0.977986	0.935848	1.06179	1.0688	1.0759	1.0831	1.30272	1.46588	1.3574	1.46692	1.5288	1.70237	1.62871	1.66707	1.63032	1.59516	1.59093
1.19699	1.23979	1.26066	1.31084	1.31558	1.32169	1.33544	1.32245	1.31794	1.34095	1.34731	1.35271	1.36986	1.32933	1.30259	1.28743	1.27976	1.30172	1.3043	1.30689	1.30949	1.31644	1.35616	1.35562	1.35509	1.35455	1.34395	1.35364	1.36079	1.3565	1.38712	1.40089	1.42072	1.41555	1.44244	1.63742	1.39337	1.56413	1.60435	1.64671	1.69174	1.7393	1.72732	1.75261	1.77866	1.78794	1.78241	1.7962	1.80488	1.76224
1.20203	1.17838	1.19977	1.23711	1.26278	1.25914	1.30239	1.31971	1.3969	1.43065	1.45952	1.49481	1.527	1.54943	1.53295	1.50055	1.47464	1.48873	1.48812	1.46576	1.48279	1.48282	1.43709	1.45365	1.50525	1.53135	1.5445	1.56946	1.56169	1.57967	1.57957	1.57222	1.59102	1.63999	1.64835	1.88744	1.60421	1.78922	1.78931	1.78525	1.83128	1.90313	1.8944	1.99846	2.03281	2.07152	2.10683	2.07883	2.1021	2.12806
0.904179	0.899251	0.898692	0.883161	0.943162	0.92629	0.912857	0.883323	0.865198	0.852515	0.842444	0.840406	0.870269	0.870816	0.907244	0.932494	0.92605	0.934787	0.933128	0.930652	0.925388	0.917805	0.900451	0.907059	0.876723	0.871241	0.877767	0.882012	0.887322	0.903183	0.89833	0.904753	0.924388	0.919722	0.919412	0.911493	0.925424	0.934352	0.962467	0.94106	0.98359	1.02273	1.05952	1.10579	1.14526	1.18335	1.16601	1.16963	1.14664	1.09837
2.16367	2.12479	2.16302	2.15215	2.16228	2.59453	2.36713	2.65868	2.70516	2.65576	2.63865	2.98322	2.719	2.65694	2.68913	2.59993	2.87115	2.99317	2.69287	2.50008	2.49506	2.3031	1.99182	1.8918	1.8778	1.864	1.8504	1.93862	1.88575	1.97322	1.93755	1.87861	1.97785	1.83402	1.86514	2.39666	2.09851	1.86632	1.82326	1.7971	1.79406	1.79103	1.74658	1.8254	1.71828	1.77038	1.7472	1.76155	1.75358	1.72388
1.1667	1.15772	1.14823	1.15475	1.14139	1.15902	1.19354	1.17715	1.16455	1.16662	1.16869	1.16272	1.13371	1.1662	1.19001	1.20965	1.23277	1.24019	1.23505	1.26503	1.29532	1.30255	1.32515	1.3327	1.32853	1.33435	1.36266	1.38788	1.37538	1.40652	1.4253	1.44279	1.43569	1.44426	1.43547	1.52192	1.39129	1.48296	1.48789	1.4884	1.55585	1.6297	1.69459	1.74439	1.79587	1.86358	1.90823	1.90797	1.88885	1.82097
0.823491	0.874357	0.865645	0.857104	0.818801	0.844853	0.840622	0.834546	0.866142	0.804516	0.804643	0.808327	0.793184	0.766348	0.761716	0.722958	0.74326	0.764734	0.787487	0.790643	0.800892	0.81141	0.77607	0.739932	0.784567	0.778078	0.771695	0.765416	0.769554	0.766157	0.762789	0.759451	0.757536	0.745196	0.733251	0.721683	0.780771	0.773341	0.766051	0.758898	0.769026	0.78219	0.795813	0.815545	0.836282	0.847412	0.854048	0.869913	0.88638	0.89874
1.3796	1.39113	1.41396	1.42894	1.46356	1.4735	1.49189	1.4113	1.44586	1.47533	1.46967	1.5065	1.54212	1.60482	1.60613	1.64036	1.67455	1.69504	1.7161	1.72562	1.74807	1.68884	1.67874	1.63237	1.6291	1.65262	1.6388	1.60963	1.56117	1.53848	1.54681	1.54119	1.57234	1.55623	1.64845	1.7523	1.4884	1.58648	1.55796	1.58426	1.63175	1.67603	1.80424	1.91276	1.96535	2.06243	2.10644	2.08762	2.07642	2.03496
1.54072	1.57428	1.5978	1.63162	1.7116	1.7106	1.68136	1.57543	1.60648	1.5947	1.59717	1.59965	1.6137	1.60962	1.61855	1.60871	1.5989	1.50863	1.52634	1.55141	1.51219	1.63545	1.60661	1.66219	1.72338	1.68586	1.64205	1.62482	1.7835	1.73003	1.84613	1.84145	1.72938	1.63017	1.79334	2.21212	2.13322	2.05976	1.99119	1.92703	1.90961	1.89251	1.87571	1.8592	1.84299	1.82705	1.81139	1.79599	1.8723	1.95539
1.31959	1.28443	1.30812	1.34012	1.34739	1.36688	1.41005	1.38612	1.38799	1.40265	1.40099	1.39933	1.4093	1.39632	1.37753	1.35923	1.34142	1.36064	1.39729	1.24647	1.37578	1.32566	1.332	1.28622	1.32008	1.36106	1.30994	1.31922	1.31834	1.29945	1.3357	1.31581	1.329	1.31192	1.33891	1.38699	1.35429	1.39715	1.41428	1.40622	1.47063	1.60988	1.67377	1.7122	1.80362	1.84195	1.85489	1.85006	1.81983	1.78164
										0.833274	0.798946	0.858688	0.895309	0.924679	0.913082	0.914538	0.907956	0.876133	0.854859	0.843149	0.831978	0.840916	0.842218	0.83652	0.829127	0.836748	0.838631	0.835421	0.838036	0.83679	0.818531	0.811522	0.81586	0.801475	0.803333	0.806506	0.803424	0.792385	0.811521	0.88331	0.938043	1.01559	1.06428	1.12866	1.18608	1.21062	1.21563	1.21217	1.20871
2.04047	1.93847	1.9397	1.94327	1.90928	1.9604	1.94355	1.90553	1.90051	1.86873	1.82069	1.80908	1.72543	1.74636	1.74732	1.78438	1.77931	1.79155	1.80396	1.78335	1.78805	1.79278	1.80383	1.89555	1.80055	1.88917	1.87832	1.84771	1.90662	1.84343	1.81362	1.77563	1.71651	1.72887	1.68217	1.83849	1.55715	1.70001	1.73185	1.74409	1.82804	1.84981	1.88175	1.9091	1.96916	2.0247	2.08347	2.00101	2.01046	2.02
1.75082	1.7908	1.83266	1.73617	1.80433	1.80239	1.8061	1.74284	1.75766	1.73919	1.7211	1.70339	1.64845	1.61074	1.68867	1.65038	1.71805	1.70618	1.69447	1.67888	1.64892	1.58374	1.60389	1.64242	1.68688	1.66728	1.64096	1.64408	1.64721	1.68156	1.64796	1.70546	1.72743	1.6759	1.72517	1.69603	1.66786	1.69758	1.72838	1.76031	1.85121	1.88767	1.92254	1.91502	1.90024	1.92941	1.9254	1.98709	1.93926	2.01518
2.40275	1.36898	1.23673	1.55848	1.2962	1.33045	1.42747	1.41543	1.45392	1.49456	1.71903	1.97043	1.68844	1.81078	2.21312	2.20471	2.40201	2.47443	2.5997	2.51639	2.43826	2.32706	2.01188	2.14054	2.61131	2.59277	2.07411	2.22947	2.13536	2.4506	2.39634	2.21435	1.79286	2.20454	2.61809	3.2767	1.75968	1.80774	1.56853	1.50229	1.38338	1.26507	1.11323	1.11514	1.11706	1.11898	1.17243	1.11874	1.12841	1.09739
1.4934	1.6076	1.45616	1.69846	1.62923	1.81249	1.5181	1.87474	1.54212	1.65659	1.82618	2.03446	1.85207	1.95677	2.07323	2.37655	2.30907	2.3874	2.47122	2.70312	2.59901	2.6338	2.66954	3.14669	2.75947	2.73932	2.71947	2.71855	3.09555	2.66869	2.91314	2.99567	2.8033	2.61673	2.48082	4.98295	1.80176	2.19823	2.07682	2.57586	2.32486	2.29557	2.31027	2.50203	2.56812	2.43772	2.60547	2.46615	2.48637	2.52913
			0.838744	0.817167	0.820914	0.824697	0.834965	0.82757	0.820305	0.813167	0.806151	0.799256	0.818377	0.838434	0.823207	0.808523	0.809393	0.810264	0.839293	0.832071	0.824972	0.817993	0.818759	0.819526	0.820295	0.821065	0.821836	0.818445	0.815081	0.856973	0.903405	0.926786	0.951409	0.922201	0.894732	0.860664	0.81585	0.79775	0.797989	0.798229	0.856933	0.924957	0.952299	0.981306	1.01214	1.01089	1.00965	1.02699	1.04493
1.14753	1.14763	1.13606	1.11703	1.11959	1.12906	1.16143	1.15938	1.15342	1.16038	1.17043	1.15407	1.166	1.13409	1.13105	1.13725	1.13082	1.15641	1.1495	1.14354	1.16688	1.15533	1.13065	1.17316	1.16471	1.18649	1.17194	1.17587	1.19312	1.19507	1.18251	1.2036	1.24092	1.22128	1.22813	1.24695	1.22561	1.26972	1.34205	1.32284	1.34419	1.34293	1.34168	1.39536	1.40682	1.4103	1.40037	1.3989	1.40682	1.39935
1.28937	1.29486	1.28241	1.32121	1.29956	1.33969	1.39354	1.35966	1.34041	1.34694	1.33121	1.31873	1.30314	1.2935	1.24078	1.28962	1.32043	1.33562	1.37206	1.42623	1.40852	1.46238	1.51269	1.53429	1.55034	1.57378	1.58084	1.58427	1.54815	1.57538	1.57653	1.58407	1.56466	1.65917	1.69226	1.92874	1.5866	1.74263	1.73901	1.72523	1.73293	1.71736	1.71043	1.70356	1.76769	1.81686	1.7959	1.78011	1.82359	1.8138
1.54155	1.52731	1.48887	1.48167	1.49654	1.49768	1.49975	1.48391	1.47945	1.4817	1.46458	1.45293	1.45005	1.46861	1.44074	1.45612	1.4409	1.42132	1.40996	1.42282	1.41019	1.39703	1.43022	1.4528	1.47846	1.42608	1.42834	1.44898	1.40414	1.41286	1.40872	1.36702	1.34209	1.40088	1.40072	1.55249	1.30333	1.35978	1.35128	1.35414	1.43377	1.56056	1.66855	1.71621	1.73638	1.77408	1.74397	1.74141	1.73887	1.7895
1.43495	1.40221	1.40531	1.39228	1.41116	1.43055	1.45049	1.48874	1.50139	1.51977	1.51291	1.57361	1.6035	1.58095	1.56475	1.54888	1.52396	1.49983	1.49262	1.52024	1.50427	1.52327	1.48693	1.42695	1.45447	1.44673	1.42193	1.42611	1.40712	1.38827	1.38719	1.38399	1.36583	1.32563	1.30053	1.35382	1.259	1.29525	1.31394	1.23215	1.21152	1.23183	1.30675	1.33216	1.34874	1.39329	1.41379	1.34912	1.33285	1.32817
0.956547	0.942359	0.947869	0.924541	0.902334	0.897477	0.892672	0.887917	0.899563	0.906915	0.914387	0.902528	0.882134	0.862642	0.866514	0.823042	0.836013	0.849398	0.852801	0.85623	0.859687	0.863172	0.847847	0.837893	0.828171	0.831933	0.835729	0.845401	0.855299	0.843199	0.831437	0.819999	0.809279	0.812027	0.814795	0.817581	0.792866	0.769602	0.789385	0.828769	0.875645	0.964957	1.05247	1.04472	1.03708	1.13535	1.16447	1.22635	1.2401	1.25416
1.53236	1.55567	1.48985	1.45286	1.43642	1.38729	1.34929	1.33262	1.31915	1.33401	1.30396	1.29056	1.24078	1.31637	1.32728	1.33297	1.30089	1.32693	1.39628	1.35912	1.38558	1.36889	1.39627	1.41436	1.43994	1.42917	1.41569	1.41102	1.38069	1.37272	1.33779	1.35026	1.32774	1.35794	1.38955	1.42883	1.40242	1.37697	1.34697	1.3414	1.45082	1.52899	1.58584	1.59893	1.6662	1.64805	1.633	1.6248	1.62162	1.63133
1.33866	1.33476	1.31435	1.30241	1.30159	1.30077	1.30333	1.28765	1.26898	1.27176	1.27455	1.27525	1.28081	1.27151	1.25748	1.26512	1.27504	1.27129	1.26755	1.26384	1.26015	1.25649	1.25344	1.25042	1.24741	1.24441	1.24143	1.23846	1.2355	1.23256	1.22964	1.23421	1.22372	1.21341	1.20327	1.1933	1.1884	1.18354	1.17872	1.13644	1.12988	1.12339	1.11698	1.11064	1.10438	1.09818	1.08706	1.07616	1.06548	1.055
	0.636123	0.659564	0.684798	0.71204	0.741539	0.773588	0.808532	0.846783	0.888833	0.935277	0.938329	0.979612	0.980949	0.985075	0.985922	1.0099	0.99379	0.997145	0.994574	0.995235	1.0035	1.00704	0.972518	0.97847	0.988986	0.985201	0.990853	0.997188	0.970775	0.994113	1.03149	1.03901	1.04333	1.06163	1.08812	1.09043	1.08249	1.09986	1.08798	1.07913	1.1581	1.24291	1.3228	1.29474	1.36152	1.37838	1.31418	1.25122	1.20589
																														1.22103	1.19635	1.18433	1.17256	1.16102	1.1497	1.1386	1.12771	1.12864	1.10123	1.13091	1.21935	1.29996	1.35654	1.39415	1.44918	1.4663	1.43379	1.40215	1.3887
																																						1.01921	1.16152	1.27387	1.1911	1.26506	1.28864	1.2707	1.31871	1.39233	1.43645	1.436	1.52751
																																							1.29844	1.40377	1.47242	1.54813	1.68299	1.84359	1.88282	1.92376	1.96652	1.92649	1.88806
																																												1.71294	1.52486	1.55128	1.41237	1.40663	1.47484
																																								1.54991	1.83497	1.87764	1.95488	1.94762	1.92429	1.95372	1.85405	1.84634	1.88452
																																																1.57901	1.5909
																																														0.880828	0.930813	1.03495	1.11603
Tx dose: 200ng INS
1.2107	1.20441	1.17878	1.1838	1.22094	1.33096	1.31778	1.24781	1.27326	1.24147	1.22729	1.31968	1.33057	1.37855	1.34486	1.42215	1.35763	1.34476	1.38005	1.35424	1.32962	1.40166	1.44671	1.39625	1.4097	1.42168	1.45229	1.56989	1.70485	1.74193	1.77348	1.70169	1.71763	1.91945	1.77212	2.28548	1.65005	1.96952	2.02919	2.17015	2.12944	2.09539	2.03556	2.14664	2.22724	2.27492	2.23765	2.30337	2.40901	2.32823
1.42803	1.4443	1.48087	1.46945	1.51033	1.55852	1.58592	1.55402	1.5853	1.57434	1.61299	1.57136	1.56135	1.56789	1.5431	1.5054	1.49878	1.49319	1.474	1.44412	1.47879	1.47507	1.49491	1.49482	1.4746	1.4729	1.49099	1.49083	1.49246	1.51572	1.5416	1.53521	1.56122	1.57954	1.66614	2.13175	1.5509	1.75975	1.72532	1.75154	1.81824	1.87523	1.92586	1.95425	2.04714	2.09584	2.0651	1.99379	2.02991	2.00757
1.22483	1.25016	1.27431	1.35856	1.47156	1.50389	1.48849	1.50316	1.53432	1.56341	1.59776	1.53157	1.50208	1.47644	1.54383	1.52349	1.51126	1.52555	1.51382	1.52939	1.52727	1.54902	1.5624	1.63695	1.57383	1.64519	1.62705	1.62539	1.6594	1.61886	1.57352	1.55817	1.55172	1.59825	1.59622	1.76104	1.41363	1.51483	1.54738	1.55741	1.53613	1.57227	1.636	1.7016	1.76237	1.7168	1.73078	1.6872	1.75138	1.71188
0.911656	0.930806	0.996602	0.9849	1.00537	1.02819	1.09716	1.07792	1.05591	1.05565	1.07593	1.08525	1.10472	1.12716	1.1363	1.15071	1.15095	1.12619	1.07784	1.06516	1.04063	1.02017	1.01612	1.02914	1.03361	1.04118	1.06105	1.15408	1.12388	1.06064	1.02577	1.01142	0.984361	1.02624	1.05594	1.11505	1.1245	1.17643	1.22453	1.29802	1.36723	1.42973	1.41632	1.43817	1.52618	1.47167	1.4697	1.43946	1.36372	1.38666
0.774786	0.766555	0.892612	0.83509	1.00347	1.1625	1.27128	1.28134	1.37011	1.4078	1.50681	1.48243	1.53835	1.53816	1.58192	1.5843	1.59293	1.60183	1.61736	1.62757	1.60695	1.63324	1.63848	1.69124	1.73284	1.66464	1.69163	1.67685	1.69204	1.73243	1.67116	1.68109	1.7443	1.78525	1.75463	2.13611	1.61134	1.84378	1.84134	1.81002	1.89846	1.96485	2.01156	2.15134	2.18567	2.27409	2.30083	2.28492	2.26802	2.30161
1.17028	1.18055	1.22937	1.20853	1.21064	1.21118	1.19464	1.19848	1.182	1.16971	1.1469	1.16108	1.16859	1.1386	1.15899	1.171	1.1871	1.1693	1.14737	1.13102	1.16706	1.14786	1.16824	1.19001	1.19251	1.21057	1.23515	1.20033	1.23934	1.19997	1.21408	1.23333	1.26176	1.24267	1.24961	1.30593	1.25097	1.33174	1.27594	1.24731	1.31113	1.39562	1.4385	1.45498	1.61077	1.64255	1.6534	1.67283	1.72381	1.67558
1.17467	1.12801	1.09347	1.04728	1.04666	1.05085	1.04462	1.06373	1.13536	1.20582	1.23267	1.18996	1.20571	1.17513	1.14308	1.13406	1.15384	1.14735	1.20724	1.22162	1.2449	1.30702	1.33191	1.29511	1.38263	1.40909	1.53999	1.58504	1.63231	1.71096	1.66249	1.65638	1.75816	1.7377	1.79583	2.11768	1.65399	1.75193	1.86107	1.85989	1.90984	1.9889	1.99963	2.06259	2.07493	2.08756	2.1157	2.08144	2.03675	2.1278
1.59342	1.58468	1.59498	1.62653	1.66615	1.65619	1.61677	1.63598	1.57106	1.57626	1.5799	1.60971	1.57696	1.63542	1.62046	1.6619	1.65983	1.6899	1.68969	1.66974	1.75893	1.74111	1.71722	1.78065	1.79008	1.82412	1.85453	1.86424	1.81528	1.8963	1.88793	1.7915	1.8348	1.82432	1.79676	1.96587	1.61222	1.75294	1.73214	1.73143	1.78555	1.8594	1.87498	1.95653	1.98942	2.08067	2.13563	2.12705	2.13986	2.1656
0.924455	0.938713	0.958511	0.99862	0.997932	1.01227	1.02345	1.0611	1.03798	1.04424	1.0354	1.06012	1.04012	1.04686	1.06568	1.08703	1.0969	1.07651	1.07783	1.11605	1.1182	1.09745	1.09652	1.11453	1.08837	1.13989	1.11826	1.13172	1.15931	1.17559	1.2122	1.23421	1.23162	1.25591	1.28793	1.3649	1.26604	1.28001	1.25425	1.31546	1.41909	1.49763	1.58884	1.65477	1.69731	1.75168	1.76318	1.78661	1.759	1.76388
0.971011	0.930942	0.969667	0.940045	0.945575	0.964103	1.00451	1.00667	1.02523	1.00334	1.02978	1.03698	1.09182	1.09595	1.10668	1.14432	1.13626	1.14088	1.15806	1.20875	1.21149	1.24607	1.29492	1.34775	1.39978	1.41549	1.4721	1.53343	1.64171	1.65123	1.62977	1.6064	1.61056	1.5024	1.46913	1.55248	1.3539	1.42923	1.46666	1.46177	1.5221	1.58065	1.64776	1.65025	1.7369	1.77553	1.75241	1.72146	1.71197	1.69208
1.28027	1.3234	1.3023	1.31023	1.30844	1.26275	1.26436	1.26294	1.28803	1.28997	1.34704	1.35252	1.39171	1.40546	1.47182	1.47126	1.46144	1.45344	1.43062	1.45247	1.41361	1.39042	1.40916	1.38717	1.37897	1.34902	1.34912	1.38022	1.38339	1.4218	1.4239	1.46997	1.49614	1.49332	1.46153	1.52419	1.44324	1.4877	1.39583	1.38519	1.44621	1.48926	1.45939	1.51838	1.60925	1.6831	1.7039	1.74291	1.67531	1.66151
1.51559	1.5269	1.53539	1.57541	1.53246	1.49514	1.50781	1.49042	1.49419	1.50398	1.4611	1.47165	1.45916	1.46908	1.45928	1.48187	1.46875	1.48044	1.48524	1.50822	1.49168	1.4932	1.52423	1.57183	1.54024	1.56429	1.58853	1.62199	1.64384	1.6253	1.65138	1.67882	1.6813	1.67195	1.65191	1.80517	1.54518	1.61429	1.49984	1.48811	1.5031	1.52019	1.51669	1.57056	1.60031	1.64264	1.63394	1.57302	1.59006	1.56751
1.33605	1.32479	1.31422	1.25405	1.29761	1.28055	1.25956	1.32631	1.25766	1.31575	1.36684	1.38502	1.38119	1.4144	1.43186	1.49028	1.52695	1.4824	1.55045	1.6082	1.51954	1.58956	1.61457	1.6866	1.72333	1.75628	1.71531	1.69521	1.70863	1.77226	1.77316	1.7267	1.74467	1.72187	1.70603	1.72287	1.55918	1.78115	1.80287	1.83136	1.81955	1.89736	1.94772	2.0469	2.10028	2.08607	2.03607	1.97344	1.91454	1.93564
0.772492	0.740787	0.762205	0.753387	0.759453	0.757327	0.787243	0.779965	0.803958	0.811375	0.83298	0.859203	0.896502	0.887083	0.910867	0.908095	0.880696	0.838876	0.867084	0.83305	0.809742	0.793721	0.770854	0.767028	0.746466	0.769198	0.775036	0.770888	0.776565	0.788689	0.825431	0.824808	0.811722	0.848203	0.852994	0.848564	0.858959	0.885274	0.909496	0.89321	0.960669	0.968599	1.03277	1.08557	1.1189	1.09104	1.03339	0.978775	1.03212	1.04975
1.4828	1.44774	1.47609	1.47876	1.4842	1.45166	1.42121	1.39744	1.44664	1.43039	1.43676	1.44005	1.44612	1.38588	1.43831	1.39932	1.3604	1.28021	1.36617	1.36886	1.35283	1.40514	1.41896	1.43212	1.40781	1.49914	1.36724	1.48758	1.57293	1.58127	1.54073	1.54921	1.44696	1.52975	1.52985	1.49869	1.35345	1.52471	1.49599	1.46793	1.48801	1.43888	1.57659	1.70741	1.77112	1.7873	1.7186	1.63775	1.62022	1.57287
1.3371	1.53264	1.51042	1.70208	1.58128	1.71929	2.0316	1.82855	2.03409	2.09231	2.08959	1.6814	1.86393	1.92886	1.96739	1.97517	1.98849	1.9716	2.93458	2.47912	2.92504	2.77894	2.81935	2.9806	2.86054	3.23911	3.1945	3.23304	3.16156	3.04058	3.18893	3.27331	3.14529	2.18494	2.21131	2.51541	2.03725	2.23858	1.96942	1.7484	1.89029	1.86502	2.01471	2.56971	2.70874	2.86368	2.57843	2.65894	2.75954	2.47036
1.01631	0.996718	0.993341	1.00543	1.01243	1.03	1.04245	1.0469	1.03867	1.05685	1.04969	1.06084	1.03821	1.00913	1.05693	1.08961	1.09785	1.12225	1.12402	1.15142	1.14252	1.14555	1.11923	1.15415	1.20165	1.22567	1.2218	1.23262	1.26492	1.27006	1.27428	1.26651	1.27009	1.26861	1.27396	1.32783	1.26204	1.31858	1.29373	1.28719	1.35735	1.39995	1.43702	1.50537	1.57803	1.57353	1.60398	1.64995	1.65105	1.66103
0.939495	0.952503	0.954471	1.00572	1.01194	1.0454	1.05668	1.06066	1.07622	1.10829	1.11634	1.10759	1.10552	1.10772	1.06058	1.08529	1.08162	1.08686	1.099	1.10884	1.12021	1.1399	1.1432	1.18979	1.17236	1.18245	1.20529	1.22823	1.21424	1.23301	1.2283	1.2407	1.23515	1.25301	1.28111	1.36123	1.27148	1.33976	1.36569	1.40587	1.459	1.51617	1.54572	1.59641	1.67961	1.77474	1.80758	1.82979	1.83328	1.8626
1.1702	1.12429	1.16847	1.10143	1.08973	1.06855	1.12335	1.14993	1.16073	1.13667	1.11209	1.11449	1.1292	1.12036	1.14145	1.16721	1.09758	1.1509	1.12555	1.11908	1.12553	1.11776	1.11297	1.09308	1.12286	1.15261	1.1242	1.14928	1.10838	1.10047	1.10546	1.13069	1.06197	1.06031	1.0602	1.13146	1.06	0.997036	1.02116	1.04972	1.07524	1.06685	1.07681	1.07931	1.10353	1.06968	1.03867	1.01519	1.00134	1.02282
1.39747	1.42308	1.42439	1.46302	1.50682	1.50104	1.5533	1.55047	1.55918	1.53854	1.56837	1.5711	1.58042	1.61203	1.58837	1.63601	1.68277	1.69373	1.75712	1.74084	1.77279	1.80132	1.87001	1.79638	1.83286	1.87717	1.90191	1.9229	1.94436	1.94295	1.94991	1.92246	1.93739	1.93816	2.1623	2.44507	1.72024	1.94725	1.94574	1.98212	1.99397	2.07641	2.14235	2.17966	2.19283	2.18843	2.21085	2.22204	2.26781	2.27482
0.846873	0.816125	0.847977	0.84498	0.859491	0.880664	0.89849	0.911686	0.943581	0.979548	1.00456	1.01708	0.998951	1.02243	1.01268	1.0414	1.06614	1.03837	1.04519	1.0182	1.02377	1.03874	1.02771	1.05109	1.09015	1.10283	1.10486	1.0895	1.12586	1.10334	1.1427	1.15591	1.14978	1.15901	1.17186	1.23424	1.1785	1.19958	1.19771	1.1738	1.22775	1.33329	1.38682	1.43613	1.50274	1.52246	1.47048	1.47896	1.47953	1.47213
1.15227	1.18485	1.16561	1.18707	1.16644	1.17704	1.13368	1.13512	1.10004	1.06973	1.06303	1.08532	1.05961	1.04819	1.08169	1.11671	1.1022	1.10456	1.08244	1.07599	1.12314	1.12549	1.14117	1.16329	1.18625	1.22511	1.2129	1.22417	1.26147	1.30928	1.3039	1.32962	1.33921	1.35264	1.33349	1.45987	1.31153	1.36168	1.33971	1.39706	1.42532	1.45475	1.4426	1.4597	1.52626	1.60067	1.55634	1.59923	1.60294	1.52357
0.691542	0.727587	0.869354	0.84619	0.85363	0.778733	0.519455	0.714941	0.752111	0.852005	0.97088	1.02242	1.07973	1.04442	1.12693	1.21851	1.0743	1.06804	0.937289	0.910693	0.873922	0.860583	0.842175	0.866894	0.893358	0.843074	0.856597	0.884992	0.877676	0.872768	0.87014	0.846488	0.849601	0.862835	0.853704	0.772513	0.906662	0.913608	0.918506	0.994783	0.999447	1.08156	1.12976	1.18998	1.25699	1.30345	1.33799	1.27052	1.29844	1.3019
1.03862	1.02649	1.0246	1.02015	1.00934	1.00531	0.995149	1.00281	1.01708	0.999668	1.01849	1.03133	1.03195	1.01885	1.04044	1.06911	1.05804	1.04831	1.03904	1.04705	1.03566	1.03997	1.03086	1.01672	1.03076	1.00461	1.01124	1.03028	1.01574	1.01267	1.0038	1.00726	0.98652	0.965448	0.963967	0.975587	0.991142	0.985419	0.96579	0.991347	1.03759	1.12848	1.24076	1.36617	1.45472	1.48401	1.52027	1.49486	1.47316	1.45178
1.21773	1.2809	1.25837	1.23319	1.20955	1.19625	1.17297	1.21918	1.21099	1.19261	1.26812	1.27057	1.36557	1.38113	1.38027	1.3775	1.44237	1.42801	1.44054	1.42534	1.4	1.3994	1.40353	1.41274	1.40058	1.38727	1.39683	1.3976	1.38699	1.38817	1.37945	1.37213	1.37401	1.33907	1.3217	1.33816	1.27944	1.31019	1.25723	1.26223	1.32944	1.38009	1.49716	1.51518	1.58582	1.60148	1.61089	1.60479	1.60166	1.53973
1.1406	1.14088	1.11691	1.08561	1.04828	1.01693	1.03417	0.994621	0.975065	0.968458	1.14287	1.42766	0.894541	0.851724	0.784717	0.794909	0.807729	0.7961	0.801148	0.805269	0.829865	1.63368	0.852837	1.48212	0.86366	0.895415	0.954093	1.0074	0.935504	0.962803	0.943009	0.971127	0.91006	0.871011	0.871454	0.939688	1.01951	0.971394	1.00323	1.07634	1.10121	1.13475	1.1704	1.20836	1.17563	1.22666	1.2047	1.21055	1.19162	1.23697
1.04067	1.05284	1.06145	1.07359	1.08733	1.09536	1.07108	1.09926	1.09514	1.12502	1.13267	1.15435	1.15191	1.19078	1.18015	1.2096	1.21053	1.2135	1.21536	1.2358	1.23153	1.23839	1.25412	1.26179	1.26548	1.28947	1.29685	1.31224	1.29459	1.34615	1.33204	1.34194	1.32242	1.34362	1.31566	1.40389	1.22535	1.23863	1.22753	1.19558	1.18708	1.21474	1.22216	1.26489	1.28261	1.2674	1.29384	1.28489	1.31015	1.34829
1.35573	1.30586	1.30071	1.27638	1.34817	1.29735	1.28068	1.25595	1.28298	1.28482	1.24666	1.30548	1.23948	1.22686	1.14939	1.22782	1.24917	1.13642	1.19215	1.19191	1.16977	1.17544	1.19556	1.19971	1.20388	1.20598	1.16031	1.12556	1.15264	1.10805	1.11621	1.13663	1.08803	1.09335	1.10543	1.14112	1.13061	1.14657	1.15128	1.1379	1.16195	1.21011	1.18984	1.16827	1.11025	1.15531	1.1768	1.15947	1.15418	1.20457
1.28439	1.23756	1.21625	1.20713	1.19621	1.19594	1.19971	1.18994	1.18832	1.19867	1.21108	1.21546	1.21413	1.20048	1.21331	1.21812	1.24471	1.26866	1.27649	1.31205	1.30163	1.33849	1.37991	1.42285	1.42475	1.46327	1.47052	1.42426	1.45111	1.4668	1.45431	1.50797	1.47648	1.51565	1.5413	1.63739	1.4387	1.51413	1.51068	1.48716	1.51833	1.58428	1.64046	1.72673	1.72092	1.74499	1.69579	1.6717	1.66023	1.59569
1.26685	1.28901	1.33575	1.3682	1.34201	1.33837	1.31871	1.39775	1.39133	1.35695	1.34408	1.36058	1.35732	1.33824	1.33883	1.34922	1.32603	1.34046	1.34625	1.33289	1.38138	1.36865	1.36368	1.36302	1.346	1.34754	1.34838	1.35748	1.3988	1.38704	1.3846	1.38512	1.35401	1.42343	1.42754	1.67207	1.2802	1.38364	1.34248	1.36625	1.45336	1.43129	1.48293	1.52117	1.58682	1.68192	1.70854	1.73603	1.7564	1.77794
0.443611	0.44871	0.390962	0.424066	0.411759	0.406517	0.404354	0.431821	0.480554	0.475131	0.636818	0.554539	0.568644	0.449211	0.609583	0.948044	1.04073	0.955066	1.00709	1.06588	1.16967	1.11423	1.09021	1.09414	1.06323	1.03442	0.985626	0.980378	0.935216	0.967465	0.961072	1.0249	0.969964	1.00119	1.01659	1.02274	1.00532	1.08148	1.02703	1.0832	1.11839	1.16854	1.19739	1.25014	1.32845	1.32368	1.31896	1.32824	1.37834	1.32728
1.26295	1.25708	1.26393	1.23444	1.20478	1.21782	1.2316	1.28399	1.24504	1.29618	1.29062	1.33788	1.37138	1.40895	1.43866	1.50373	1.5095	1.52585	1.52965	1.55165	1.57113	1.69326	1.70337	1.67751	1.79071	1.84155	1.88384	1.80129	1.83869	1.69416	1.67465	1.56987	1.51218	1.48206	1.44458	1.47061	1.34903	1.39479	1.31975	1.36786	1.37343	1.4686	1.52601	1.50728	1.5253	1.54376	1.56266	1.58204	1.52632	1.52153
1.08469	1.07502	1.04304	1.03497	1.08666	1.08385	1.01471	1.0458	1.0109	0.972349	1.00809	1.04239	1.01577	0.953076	0.958541	0.980038	0.987379	0.991301	0.956474	0.964604	0.913622	0.922669	0.904677	0.901312	0.909845	0.945411	0.994482	1.03722	1.07539	1.09619	1.11511	1.06949	1.06497	1.04611	1.04415	1.08345	1.09702	1.13021	1.14898	1.15464	1.20852	1.2568	1.27496	1.3529	1.47901	1.47672	1.45438	1.52774	1.50715	1.56999
1.1301	1.13942	1.14911	1.1515	1.14861	1.15958	1.13302	1.13759	1.11791	1.08882	1.09799	1.10862	1.08641	1.05938	1.08645	1.12306	1.12257	1.12209	1.12809	1.14087	1.14792	1.18128	1.17312	1.18624	1.20826	1.18612	1.20127	1.20864	1.2161	1.24348	1.25458	1.26814	1.28201	1.28976	1.29761	1.29992	1.30223	1.30213	1.22205	1.16776	1.14337	1.17536	1.21803	1.29123	1.37194	1.3612	1.34442	1.32806	1.31208	1.25366
2.52537	3.271	2.83674	2.78874	2.93969	3.54305	3.3184	4.02375	4.43951	4.155	3.38775	3.16897	2.67721	2.65955	2.30967	1.97895	1.98893	1.90154	2.09526	1.96148	2.25549	1.9099	1.786	1.50516	1.45327	1.4346	1.44364	1.42425	1.46822	1.44258	1.39405	1.33874	1.32488	1.25357	1.20699	1.32273	1.16201	1.12654	1.09242	1.16157	1.10753	1.09224	1.06034	1.1124	1.10314	1.07599	1.0806	1.07889	1.0486	1.0204
1.40264	1.41653	1.44496	1.41552	1.41176	1.38689	1.34809	1.32912	1.331	1.35242	1.30142	1.30553	1.32553	1.32515	1.35434	1.37858	1.24798	1.35304	1.3638	1.37473	1.37225	1.36148	1.32019	1.30087	1.28211	1.24363	1.24277	1.12058	1.20876	1.24112	1.23363	1.22597	1.23262	1.23935	1.23688	1.26213	1.23238	1.28495	1.26329	1.23727	1.2964	1.34334	1.39381	1.46158	1.51295	1.59167	1.60731	1.62505	1.59828	1.57081
0.495189	0.49387	0.519211	0.488064	0.500524	0.513517	0.488182	0.46508	0.443419	0.540177	0.57642	0.641913	0.717194	0.755626	0.775825	0.779306	0.78879	0.79879	0.785813	0.755645	0.798439	0.812524	0.827497	0.81785	0.864538	0.891309	0.894354	0.882582	0.895705	0.898876	0.898901	0.924587	0.917072	0.989342	0.999924	1.09406	1.01938	1.09253	1.09539	1.07473	1.10105	1.23785	1.29687	1.30096	1.3329	1.30494	1.4293	1.45978	1.45984	1.40649
1.00393	0.988768	1.02602	1.01972	1.01301	1.04053	1.05301	1.02502	1.0176	1.02982	1.02306	1.02966	1.03249	1.02426	1.0277	1.07991	1.06595	1.10779	1.0988	1.11242	1.09489	1.14012	1.11385	1.13293	1.13051	1.14764	1.13186	1.13323	1.14786	1.12749	1.14055	1.15884	1.1794	1.18885	1.23529	1.2991	1.23094	1.26268	1.31522	1.30961	1.40231	1.50774	1.5339	1.63063	1.79366	1.79837	1.84216	1.8367	1.84196	1.81714
1.12089	1.11358	1.13003	1.10864	1.12428	1.10836	1.11927	1.12519	1.13423	1.11785	1.09144	1.1147	1.08045	1.10228	1.10386	1.11448	1.0895	1.1259	1.13239	1.13223	1.1186	1.12355	1.12773	1.14508	1.13908	1.15122	1.15037	1.15517	1.17264	1.14599	1.14645	1.14152	1.13561	1.12006	1.13185	1.16771	1.14703	1.18464	1.17551	1.19929	1.23393	1.2583	1.32067	1.31303	1.35043	1.39002	1.42911	1.45048	1.46848	1.45095
1.39237	1.36461	1.3138	1.28422	1.30659	1.24149	1.20838	1.19451	1.19013	1.12814	1.11987	1.14281	1.13646	1.10809	1.12835	1.10983	1.09795	1.09178	1.08568	1.08215	1.08635	1.04749	1.08406	1.09021	1.12995	1.1225	1.05357	1.0785	1.02238	1.0657	1.06886	1.07294	1.05201	1.07849	1.09546	1.12004	1.07474	1.09166	1.07603	1.10842	1.14281	1.17941	1.21843	1.26012	1.2604	1.33147	1.36131	1.29774	1.30823	1.3189
1.2185	1.21143	1.20133	1.18826	1.18759	1.20627	1.21306	1.22944	1.2734	1.27818	1.31381	1.27149	1.32338	1.27228	1.29187	1.35298	1.39866	1.46906	1.50745	1.51961	1.54938	1.49438	1.51906	1.50079	1.50008	1.49205	1.47218	1.43973	1.43998	1.42789	1.43639	1.41582	1.41171	1.38469	1.39639	1.4727	1.32687	1.37313	1.32021	1.37288	1.547	1.54736	1.52562	1.6217	1.62281	1.66964	1.7244	1.73598	1.74196	1.65006
0.990304	0.98149	0.955807	0.911687	0.933192	0.950583	0.930802	0.928497	0.924817	0.936449	0.916296	0.914388	0.935089	0.942887	0.910861	0.905259	0.90273	0.89909	0.920746	0.877418	0.876156	0.874898	0.861235	0.88555	0.889611	0.904941	0.901249	0.922046	0.918136	0.950044	0.946731	0.969826	0.987542	0.995197	0.999446	1.03898	1.0193	1.05872	1.05938	1.0852	1.1532	1.27166	1.40422	1.48641	1.49413	1.48831	1.43872	1.34987	1.34044	1.33462
0.900155	0.952194	1.03547	1.08605	1.14606	1.11243	1.1082	1.17345	1.17325	1.18864	1.18313	1.13948	1.1354	1.15344	1.17423	1.17601	1.16755	1.17275	1.18826	1.23866	1.29353	1.27271	1.29552	1.36731	1.477	1.37094	1.4229	1.38315	1.41349	1.35648	1.41531	1.41117	1.41702	1.45815	1.4986	2.18565	1.29766	1.45438	1.41978	1.41668	1.48777	1.49098	1.49895	1.49867	1.4984	1.49812	1.49785	1.49757	1.4973	1.47646
1.19797	1.21673	1.22289	1.24889	1.27085	1.2833	1.31119	1.28338	1.30666	1.27639	1.25032	1.23263	1.29368	1.30486	1.32401	1.29508	1.32728	1.35895	1.35903	1.34601	1.3365	1.3271	1.38347	1.29478	1.36782	1.32522	1.37347	1.27811	1.33206	1.30139	1.32441	1.3189	1.32672	1.36093	1.34473	1.43028	1.31014	1.37885	1.38458	1.31257	1.29981	1.33363	1.36926	1.42802	1.49205	1.56103	1.68131	1.78809	1.71884	1.77657
1.12676	1.10813	1.10227	1.07559	1.09298	1.09288	1.07998	1.09146	1.07771	1.0434	1.04826	1.08072	1.08169	1.05791	1.06984	1.08035	1.0814	1.07516	1.09578	1.07731	1.1046	1.09312	1.08725	1.09384	1.07712	1.10313	1.10281	1.10812	1.12089	1.15306	1.11835	1.18997	1.20248	1.19898	1.18986	1.22064	1.1443	1.18235	1.18554	1.18283	1.21007	1.28224	1.31718	1.32039	1.44945	1.49372	1.492	1.48581	1.53364	1.55791
																							1.22426	1.18271	1.17696	1.17127	1.16722	1.1632	1.18367	1.18935	1.19508	1.20088	1.24394	1.29022	1.34007	1.27275	1.21187	1.17983	1.22989	1.27701	1.29719	1.31802	1.33953	1.33287	1.32628	1.31975	1.36222	1.4075	1.4559
0.898943	0.888514	0.874231	0.860399	0.844401	0.864637	0.885867	0.872799	0.860111	0.917011	0.815169	0.865681	0.922867	0.874179	0.926524	0.851636	0.840229	0.845072	0.870486	0.85865	0.861674	0.852858	0.868928	0.864982	0.890919	0.901095	0.911507	0.922162	0.846126	0.898836	0.842485	0.856336	0.838999	0.802322	0.822909	0.844579	0.938074	0.871389	0.877107	0.90998	0.997162	1.06667	1.11005	1.18458	1.19754	1.17438	1.1521	1.31951	1.22177	1.51056
1.32193	1.23117	1.22468	1.23877	1.23608	1.2361	1.26471	1.24451	1.27821	1.28705	1.32218	1.37251	1.40429	1.38641	1.43513	1.41902	1.48096	1.57197	1.57628	1.62061	1.69143	1.73475	1.79112	1.79848	1.81042	1.7455	1.71541	1.72332	1.77263	1.73926	1.75628	1.75075	1.74653	1.76712	1.75394	1.92972	1.66025	1.77453	1.8499	1.87939	1.9818	2.01395	2.04197	2.03827	2.07932	2.1281	2.08189	2.11401	2.11244	2.08057
1.32681	1.35431	1.34657	1.31996	1.30717	1.28829	1.32269	1.31209	1.31361	1.3326	1.35215	1.35018	1.35472	1.39077	1.38037	1.3726	1.37083	1.37578	1.40345	1.38944	1.41434	1.40135	1.3687	1.36246	1.33637	1.36329	1.35785	1.33218	1.35428	1.37259	1.42464	1.45685	1.44326	1.4365	1.42384	1.44741	1.32104	1.36401	1.33103	1.35431	1.36721	1.4356	1.48361	1.53144	1.53042	1.59391	1.61875	1.6055	1.61258	1.62977
1.03038	1.0186	1.03954	1.01231	1.22265	1.02667	1.08149	1.02622	0.999926	1.0457	0.984865	0.983663	1.01928	1.03349	1.0073	1.08171	1.168	1.092	1.07931	1.06901	1.08337	1.0738	1.11115	1.07324	1.1039	1.0865	1.11694	1.07175	1.07314	1.08825	1.10566	1.12551	1.14609	1.16555	1.12231	1.21024	1.15784	1.15208	1.18584	1.22164	1.24472	1.21001	1.28637	1.33872	1.38743	1.41468	1.43359	1.45301	1.47285	1.49324
0.969745	1.0283	0.990998	0.968374	0.9363	0.896008	0.861174	0.892068	0.861449	0.862179	0.78924	0.849527	0.818606	0.819168	0.800372	0.782419	0.752771	0.79686	0.804871	0.773318	0.789506	0.806385	0.806151	0.800651	0.788653	0.793404	0.803851	0.814576	0.780789	0.807679	0.811372	0.843105	0.839075	0.789296	0.808744	0.792901	0.782012	0.822026	0.844519	0.829719	0.832804	0.832229	0.854399	0.864321	0.874476	0.873294	0.878778	0.86543	0.857214	0.882737
1.19636	1.22188	1.22921	1.22473	1.22029	1.24093	1.18163	1.18094	1.17357	1.20372	1.15954	1.15707	1.15993	1.18455	1.14702	1.13601	1.13058	1.13456	1.13858	1.14262	1.13121	1.1178	1.1047	1.1117	1.11712	1.1226	1.12814	1.12696	1.13086	1.09917	1.08281	1.06692	1.03504	1.09591	1.10173	1.07784	1.09526	1.11325	1.09011	1.07091	1.10116	1.1303	1.16932	1.17224	1.23121	1.29038	1.32535	1.37385	1.36516	1.35658
0.99836	0.952115	0.934019	0.961903	0.953052	0.921263	0.91942	0.917584	0.890291	0.899753	0.932307	0.926501	0.936536	0.956028	0.936677	0.914695	0.900898	0.923805	0.990601	0.966226	1.0174	1.02417	1.019	1.00108	1.03665	1.06047	1.05281	1.04644	1.04015	1.05319	1.06657	1.08732	1.10889	1.14479	1.08653	1.12585	1.1403	1.15777	1.16053	1.24645	1.29757	1.44049	1.50217	1.59753	1.61572	1.61708	1.58391	1.54712	1.57452	1.52895
					0.811641	0.884207	0.888981	0.931419	0.942498	1.00974	1.01663	1.03987	1.05275	1.09328	1.10149	1.12986	1.12321	1.09665	1.09742	1.12012	1.08394	1.08708	1.08184	1.07665	1.09168	1.09955	1.12599	1.08439	1.09554	1.11144	1.11963	1.12521	1.09865	1.13733	1.18875	1.13295	1.17173	1.15608	1.17809	1.22596	1.30684	1.35245	1.4058	1.43722	1.44542	1.39445	1.42763	1.47411	1.47488
							0.799856	0.877927	0.972886	1.09088	1.24145	1.44023	1.45492	1.46991	1.48521	1.55787	1.54411	1.60458	1.55288	1.57788	1.57758	1.62198	1.66308	1.63171	1.64955	1.61847	1.50009	1.55689	1.54068	1.49261	1.49857	1.47247	1.51286	1.44716	1.55411	1.40142	1.42842	1.43259	1.35696	1.36046	1.33664	1.30209	1.32963	1.3786	1.38953	1.28895	1.32714	1.27957	1.22659
							0.835612	0.690722	0.941451	1.04655	1.27354	1.20358	1.21022	1.09673	0.999435	0.972507	0.953354	0.947092	0.925216	0.848424	0.815242	0.839794	0.823472	0.810798	0.774437	0.819028	0.836606	0.798398	0.854056	0.819193	0.869543	0.888243	0.870994	0.923212	0.890803	0.910847	1.02226	0.985027	0.989907	1.05768	1.08354	1.06585	1.14457	1.19577	1.19854	1.1919	1.2147	1.21224	1.20979
																					1.19832	1.19895	1.19958	1.20021	1.21228	1.2246	1.23717	1.25	1.26309	1.27647	1.29013	1.29201	1.29389	1.24179	1.25576	1.27005	1.28466	1.24427	1.2958	1.31052	1.34172	1.37444	1.41629	1.451	1.45287	1.45126	1.445	1.43864	1.40097
														0.746504	0.713561	0.699219	0.70752	0.713602	0.731053	0.717823	0.741279	0.732679	0.763371	0.760415	0.775098	0.789889	0.790198	0.841643	0.830515	0.826455	0.862177	0.874292	0.858606	0.885472	0.890428	0.859181	0.874636	0.888204	0.921341	0.976979	1.08004	1.09931	1.17178	1.17458	1.11593	1.08351	1.0783	1.08647	1.06609
																		2.4324	2.42377	2.4152	2.40669	2.39824	2.38984	2.38151	2.37324	2.33396	2.25277	2.17705	2.46957	2.60691	2.76042	2.93314	3.12892	3.35271	3.61097	3.43467	3.27478	3.12912	2.99586	2.87349	2.76072	2.65647	2.55981	2.63514	2.54731	2.52956	2.44573	2.35487	2.31093
																																			1.46523	1.42774	1.39213	1.35824	1.62196	2.01276	1.55705	1.63634	1.77307	1.64645	1.64528	1.64412	1.64296	1.64064	1.58392
1.40465	1.39958	1.38318	1.38972	1.38486	1.38737	1.39316	1.45041	1.42468	1.42064	1.44836	1.47254	1.4703	1.52667	1.52971	1.58006	1.56759	1.58491	1.59265	1.58612	1.54485	1.58675	1.64619	1.6745	1.72021	1.72075	1.67924	1.64512	1.65782	1.60303	1.67843	1.65068	1.67951	1.65173	1.60715	2.00984	1.61055	1.82788	1.79049	1.81334	1.85998	1.90012	1.95256	1.91547	1.98312	1.98831	1.98925	2.01073	1.96885	2.02894
1.47699	1.43771	1.43177	1.43677	1.42995	1.43489	1.43154	1.44759	1.45206	1.44764	1.44326	1.46197	1.45826	1.46432	1.49151	1.49838	1.48455	1.5155	1.52492	1.52864	1.51024	1.51259	1.53049	1.50365	1.5294	1.54686	1.54731	1.55333	1.54942	1.52965	1.51306	1.5173	1.5128	1.50013	1.47601	1.49939	1.4375	1.46101	1.47443	1.46442	1.46586	1.4655	1.479	1.51615	1.51106	1.51118	1.51959	1.53586	1.55257	1.53724
1.67158	1.67068	1.70186	1.72155	1.68073	1.6325	1.65351	1.64791	1.69354	1.67488	1.63907	1.62329	1.60128	1.58224	1.5642	1.54576	1.52291	1.53362	1.54228	1.5613	1.5639	1.59942	1.5707	1.56428	1.60544	1.59177	1.61662	1.6648	1.62118	1.65236	1.6629	1.66826	1.69507	1.68066	1.68491	1.73646	1.61053	1.6793	1.63703	1.61131	1.60275	1.69036	1.65516	1.63746	1.69421	1.6649	1.67784	1.72873	1.69698	1.66207
1.44642	1.4251	1.38943	1.38032	1.36265	1.34163	1.35157	1.3487	1.38502	1.39338	1.38045	1.37195	1.32696	1.32334	1.31306	1.31813	1.34272	1.3436	1.34156	1.32792	1.30119	1.2922	1.34408	1.36004	1.35414	1.33932	1.32334	1.29342	1.29726	1.3509	1.36013	1.34604	1.36733	1.35694	1.33103	1.41537	1.2746	1.28367	1.27367	1.29411	1.32388	1.44642	1.4864	1.47315	1.52997	1.56498	1.51816	1.51647	1.50964	1.43699
1.40505	1.45714	1.42284	1.54158	1.54156	1.55706	1.54481	1.53117	1.46042	1.47489	1.4527	1.28139	1.41086	1.32391	1.34086	1.35864	1.41273	1.06852	1.43573	1.38498	1.46941	1.50054	1.57983	1.58941	1.52013	1.54494	1.50908	1.41199	1.44412	1.34171	1.46786	1.40277	1.43421	1.42232	1.38777	1.61859	1.40248	1.49051	1.42141	1.52167	1.51808	1.61208	1.57479	1.64858	1.65389	1.63552	1.44653	1.47564	1.44788	1.41983
1.23198	1.23874	1.21806	1.21008	1.22304	1.20544	1.20254	1.19218	1.16202	1.14075	1.17947	1.15682	1.1289	1.15189	1.14363	1.13692	1.14037	1.13981	1.13424	1.15808	1.11753	1.11474	1.17025	1.16874	1.1329	1.15503	1.12527	1.17178	1.14634	1.13083	1.09558	1.09779	1.08127	1.11893	1.1286	1.19296	1.13896	1.25175	1.30825	1.33405	1.40139	1.49872	1.54778	1.60221	1.71987	1.75409	1.74061	1.76064	1.84249	1.81702
1.06906	1.07841	1.07237	1.07528	1.09402	1.09667	1.09214	1.08874	1.11162	1.11623	1.14958	1.15052	1.13614	1.15077	1.14711	1.14775	1.14801	1.14414	1.14456	1.13962	1.13879	1.14721	1.14466	1.16424	1.19866	1.25177	1.29535	1.31713	1.30298	1.27501	1.23182	1.2195	1.20227	1.22315	1.27551	1.3772	1.32045	1.40453	1.41358	1.43854	1.47811	1.51144	1.57062	1.58506	1.63311	1.68777	1.76033	1.77165	1.76719	1.73079
1.11261	1.10476	1.13485	1.12639	1.16656	1.1952	1.20573	1.19999	1.22908	1.23918	1.26985	1.33425	1.33182	1.33904	1.34875	1.36964	1.40447	1.33972	1.31599	1.24522	1.22048	1.21416	1.2079	1.20993	1.18065	1.17367	1.20933	1.20906	1.21612	1.22832	1.24053	1.2959	1.2975	1.30526	1.29375	1.37398	1.25575	1.297	1.30971	1.40742	1.42144	1.53373	1.59776	1.71731	1.71321	1.78784	1.81506	1.87672	1.91742	1.95492
1.11436	1.14078	1.09199	1.08063	1.11343	1.13423	1.14452	1.16866	1.18437	1.22015	1.22142	1.2064	1.21259	1.23023	1.20064	1.21852	1.23208	1.21227	1.21593	1.22817	1.20716	1.19689	1.20508	1.22729	1.18937	1.23656	1.22228	1.22281	1.23531	1.23844	1.22707	1.2455	1.28348	1.3633	1.29116	1.4672	1.2911	1.34735	1.3736	1.33027	1.37125	1.37488	1.45259	1.50554	1.46984	1.55527	1.57988	1.57834	1.59001	1.57472
1.21031	1.19319	1.15708	1.15564	1.11056	1.13844	1.16684	1.18965	1.19678	1.21942	1.20913	1.23532	1.23319	1.27765	1.31002	1.33953	1.3817	1.41871	1.47125	1.54301	1.59617	1.61534	1.63621	1.64466	1.5954	1.54693	1.49444	1.46849	1.43496	1.39597	1.35994	1.28486	1.27063	1.24928	1.24784	1.25625	1.20776	1.24538	1.20039	1.24671	1.278	1.37779	1.41733	1.45962	1.50762	1.5112	1.56994	1.59234	1.61667	1.59398
1.18445	1.18505	1.19364	1.19971	1.18222	1.21087	1.18608	1.1894	1.20918	1.23012	1.22788	1.24313	1.23823	1.22278	1.23499	1.25732	1.26716	1.28017	1.2767	1.27155	1.35077	1.34036	1.34317	1.35721	1.28279	1.34877	1.32156	1.35842	1.32561	1.40209	1.36554	1.36118	1.43099	1.43104	1.41156	2.32374	1.29512	1.45102	1.47495	1.4664	1.45389	1.45289	1.46539	1.47847	1.48803	1.48412	1.48022	1.49799	1.5162	1.55716
1.46406	1.41077	1.44335	1.38732	1.39529	1.42301	1.51823	1.44594	1.48356	1.52978	1.50366	1.53041	1.51095	1.53848	1.54264	1.55895	1.53012	1.51801	1.53499	1.48979	1.53741	1.49312	1.50738	1.58928	1.49339	1.5864	1.6105	1.62509	1.64984	1.61081	1.75443	1.77897	1.81659	1.78689	1.88816	3.06879	1.50211	1.74935	1.74691	1.74447	1.80275	1.86505	1.81879	1.89342	1.90362	1.9937	1.98124	1.96893	1.9901	1.87781
1.27314	1.30488	1.28265	1.29769	1.31521	1.33265	1.31017	1.29817	1.22805	1.27967	1.28144	1.33109	1.29797	1.26449	1.30324	1.29086	1.27773	1.26487	1.27203	1.28454	1.29358	1.31156	1.32091	1.3304	1.32173	1.32873	1.33581	1.33386	1.33416	1.33237	1.33015	1.3478	1.38988	1.44388	1.44263	1.60345	1.38855	1.41059	1.30951	1.3448	1.39297	1.54423	1.5759	1.60419	1.67695	1.69464	1.68607	1.74534	1.86184	1.89278
1.69655	1.59922	1.55083	1.6676	1.68809	1.69191	1.77063	1.77516	1.85132	1.66153	1.63805	1.51896	1.56382	1.64882	1.68288	1.69731	1.70737	1.6391	1.6236	1.70617	1.68078	1.71643	1.61701	1.77526	1.76734	1.78922	1.9149	1.92545	1.88758	1.91332	1.86885	1.94212	2.01192	2.09701	2.13865	2.42207	1.74551	1.95044	1.91082	1.95122	1.91076	1.92425	1.93434	1.94133	1.96138	1.87957	2.1712	2.15315	2.06891	2.09911
0.894588	0.89228	0.879855	0.876757	0.878493	0.87189	0.875509	0.881467	0.898915	0.91597	0.915751	0.943241	0.96389	0.980403	0.986745	1.01527	1.02189	1.04582	1.07378	1.08683	1.07567	1.05795	1.07501	1.08262	1.11999	1.12494	1.07126	1.08037	1.04466	1.04678	1.04828	1.10147	1.12822	1.15764	1.15322	1.1407	1.15577	1.14453	1.10914	1.12303	1.16999	1.17298	1.1796	1.22172	1.2428	1.24397	1.24774	1.24357	1.25263	1.24375
1.13556	1.13987	1.16132	1.17203	1.18731	1.17663	1.1767	1.1958	1.20636	1.22674	1.22559	1.20799	1.21838	1.23336	1.23704	1.23134	1.22572	1.22445	1.22019	1.19675	1.18033	1.16051	1.11344	1.08754	1.05755	1.06612	1.02088	1.0455	1.03771	1.02467	1.01138	1.01758	1.05263	1.09999	1.15049	1.16866	1.16772	1.21534	1.15859	1.13569	1.18942	1.23585	1.33131	1.32654	1.40981	1.40281	1.46367	1.53005	1.54691	1.49469
1.17389	1.20003	1.23487	1.18861	1.22413	1.14897	1.18099	1.16248	1.20937	1.11575	1.05679	1.11524	1.10896	1.12357	1.1629	1.13634	1.08607	1.06718	1.12787	1.11768	1.12152	1.12539	1.15072	1.16146	1.14268	1.18366	1.18906	1.24082	1.24834	1.22077	1.24773	1.25352	1.27726	1.28184	1.29714	1.32545	1.33284	1.3931	1.35079	1.34762	1.44082	1.54449	1.60761	1.6272	1.63379	1.67877	1.76954	1.73683	1.77848	1.78535
1.01485	1.02842	1.06695	1.08303	1.0996	1.06203	1.06988	1.07784	1.12888	1.14655	1.17292	1.09863	1.14284	1.16454	1.14092	1.16142	1.17938	1.18788	1.13826	1.24017	1.25403	1.31588	1.26545	1.29727	1.29785	1.22686	1.31621	1.27033	1.27989	1.28336	1.2392	1.21872	1.22415	1.22963	1.22804	1.22645	1.2238	1.2105	1.22423	1.19849	1.24184	1.29609	1.33592	1.36035	1.42599	1.3924	1.45564	1.40463	1.40419	1.46371
1.87745	1.85518	1.84814	1.79024	1.82315	1.78928	1.78954	1.85178	1.8092	1.83093	1.82577	1.77942	1.79637	1.80328	1.81377	1.77546	1.79755	1.74724	1.73703	1.77543	1.7199	1.72543	1.69246	1.70396	1.69428	1.67094	1.62984	1.53655	1.48482	1.48996	1.49187	1.45188	1.47009	1.35771	1.41361	1.46429	1.33449	1.38295	1.34215	1.34425	1.36218	1.39018	1.38111	1.45686	1.50136	1.46785	1.47238	1.46277	1.46553	1.44227
1.10806	1.09257	1.06757	1.08663	1.07814	1.06939	1.07553	1.11639	1.09475	1.12398	1.12145	1.13469	1.13358	1.12828	1.11999	1.09468	1.10686	1.09572	1.07077	1.06185	1.05888	1.05336	1.0555	1.06475	1.06157	1.07683	1.07266	1.06198	1.07222	1.07826	1.08003	1.11455	1.08834	1.07258	1.07298	1.06896	1.07696	1.06459	1.06319	1.04546	1.07199	1.11843	1.1553	1.18279	1.19806	1.21342	1.2021	1.25006	1.26568	1.24663
3.38388	3.98804	3.2538	2.62732	3.9444	3.03911	5.81265	4.98325	3.39433	3.51137	4.27294	1.50103	2.42759	1.14093	1.51485	1.47799	1.25793	1.22611	1.25804	1.4266	1.34399	1.32255	1.36946	1.31477	1.26429	1.28743	1.39528	1.34767	1.45091	1.484	1.48136	1.57495	1.44994	1.45928	1.9435	2.90867	1.30043	1.39791	1.51119	1.60468	1.5924	1.5803	1.74242	1.61134	1.66439	2.04452	1.77899	1.8168	1.79326	1.81359
1.3199	1.26807	1.29202	1.34463	1.30693	1.2907	1.34183	1.28786	1.26196	1.29021	1.30716	1.28311	1.28909	1.31856	1.32741	1.31268	1.33714	1.32814	1.34512	1.32237	1.34796	1.36026	1.37129	1.49045	1.71674	2.07915	2.7909	2.17269	2.92384	2.36424	2.85068	2.78367	2.56716	2.81861	3.07633	5.52382	2.26715	2.92676	3.03901	3.06815	2.76265	3.09146	3.05818	3.25247	3.3289	3.13436	2.98442	2.59948	2.42248	2.42184
1.03077	1.05911	1.07339	1.05609	1.08401	1.09471	1.11177	1.09811	1.09336	1.09029	1.09311	1.09594	1.10633	1.115	1.1238	1.1297	1.13172	1.15287	1.15847	1.18433	1.21886	1.20362	1.20133	1.21569	1.25055	1.27378	1.3077	1.30412	1.3014	1.26078	1.22169	1.2299	1.24717	1.24986	1.30134	1.40087	1.38252	1.36464	1.38995	1.40138	1.49525	1.56809	1.61275	1.68749	1.72555	1.77369	1.81789	1.85557	1.85846	1.9275
1.5329	1.53051	1.55359	1.53838	1.54669	1.55222	1.48321	1.55554	1.52856	1.54574	1.55094	1.54864	1.54779	1.56429	1.61808	1.61306	1.60822	1.68305	1.59407	1.63536	1.61459	1.66929	1.67894	1.75414	1.8554	1.71038	1.73036	1.71646	1.70076	1.73866	1.79727	1.90128	1.70064	1.69113	1.78654	1.5978	1.44512	1.73043	1.81479	1.9078	1.86836	1.93128	1.98028	2.02195	2.13379	2.13032	2.13031	2.24366	2.29431	2.32597
1.27805	1.2479	1.27587	1.25101	1.26112	1.25934	1.27848	1.291	1.29879	1.29054	1.3154	1.34123	1.3681	1.4152	1.4417	1.45025	1.41494	1.4465	1.43659	1.46023	1.4327	1.4062	1.39565	1.35812	1.44245	1.42501	1.43599	1.42873	1.45389	1.42801	1.43046	1.43292	1.44726	1.45579	1.46427	1.72133	1.36844	1.49294	1.45862	1.45827	1.48366	1.55289	1.57905	1.6911	1.72664	1.62091	1.58158	1.57158	1.60875	1.56789
1.41227	1.3856	1.43528	1.44387	1.39814	1.40053	1.39495	1.37124	1.39639	1.37892	1.39786	1.38804	1.42292	1.43178	1.45668	1.44358	1.43486	1.4519	1.41753	1.41321	1.38752	1.43758	1.3629	1.44032	1.41839	1.41272	1.39542	1.40991	1.45517	1.46164	1.48331	1.44268	1.44759	1.47861	1.45229	1.93927	1.31302	1.53934	1.5007	1.51819	1.56508	1.54823	1.56284	1.57772	1.50192	1.58953	1.55681	1.49536	1.51405	1.51501
0.984637	1.0564	1.2333	1.30199	1.30863	1.31362	1.29805	1.31252	1.34615	1.31929	1.29452	1.29063	1.22565	1.19396	1.1531	1.14689	1.11112	1.10809	1.08896	1.07837	1.07976	1.11474	1.13141	1.15938	1.15603	1.19365	1.20409	1.22998	1.26494	1.28632	1.32646	1.3692	1.39611	1.4274	1.44762	1.63583	1.4706	1.60364	1.56805	1.5835	1.61556	1.67069	1.68451	1.67356	1.67286	1.70448	1.7563	1.72777	1.72501	1.73475
2.23584	2.02312	2.07566	2.09836	2.23083	2.09063	2.03253	2.20266	2.36063	2.55671	2.34484	2.2761	2.41545	2.48522	2.17526	2.31179	2.33172	2.352	2.42736	2.44399	2.68355	2.6481	2.75151	2.55043	2.71346	2.90749	2.54333	3.00437	3.11172	3.08098	3.0658	3.05077	2.68132	2.53566	2.49972	3.20604	2.28906	2.65289	2.60175	3.01068	2.79184	2.96349	2.949	2.48926	3.09904	2.78423	2.66498	2.6264	2.58893	2.66184
1.38075	1.34565	1.34412	1.35145	1.32819	1.30567	1.29708	1.30113	1.289	1.31125	1.3226	1.31809	1.27272	1.27341	1.26683	1.26502	1.25958	1.25418	1.28571	1.23966	1.28682	1.29537	1.29562	1.28555	1.30181	1.36189	1.32596	1.3008	1.34077	1.37045	1.35806	1.36295	1.36787	1.36239	1.39374	1.52968	1.34484	1.37121	1.39862	1.43598	1.49546	1.53182	1.62597	1.66986	1.66334	1.69941	1.70434	1.73008	1.70884	1.73937
1.15168	1.14955	1.15203	1.13283	1.1077	1.11968	1.09558	1.10451	1.11137	1.12554	1.14647	1.15875	1.16441	1.18285	1.16275	1.11054	1.22966	1.23949	1.18036	1.14731	1.19181	1.24504	1.21514	1.20684	1.22741	1.2085	1.29879	1.33626	1.41046	1.33033	1.28768	1.44543	0.824535	0.738294	0.676459	0.624182	0.687471	0.475374	0.563591	0.692009	0.896219	0.972814	0.991423	1.17105	1.17812	1.23334	1.25561	1.21216	1.20414	1.19622
1.24765	1.23374	1.21828	1.22443	1.24236	1.22029	1.18374	1.19502	1.19592	1.24651	1.1955	1.20238	1.30336	1.25146	1.31534	1.28867	1.30358	1.23879	1.25236	1.2711	1.3025	1.24632	1.27126	1.24879	1.27296	1.23935	1.2444	1.27809	1.29938	1.24953	1.2312	1.24909	1.2603	1.2913	1.29835	1.39953	1.2969	1.38388	1.31825	1.36208	1.45331	1.52838	1.53027	1.5892	1.58334	1.59776	1.50838	1.5267	1.51582	1.52289
1.0494	1.0235	0.977958	0.971823	0.950633	0.955193	0.937899	0.965846	0.973742	0.97551	0.984387	0.972524	0.985708	0.987971	0.960313	0.949641	0.947593	0.958932	0.939256	0.920372	0.899615	0.875434	0.880098	0.87727	0.842629	0.850118	0.86311	0.830857	0.835012	0.809335	0.812814	0.841679	0.865733	0.90066	0.966652	1.02133	1.04869	1.06902	1.09015	1.10951	1.17052	1.23863	1.31515	1.37679	1.45397	1.48744	1.4684	1.46636	1.48074	1.42753
1.08192	1.08476	1.06774	1.06681	1.06742	1.11312	1.12533	1.13704	1.12734	1.12711	1.14707	1.15893	1.14337	1.17133	1.17123	1.19564	1.19319	1.19099	1.19631	1.17851	1.19576	1.18661	1.2084	1.21326	1.19289	1.25906	1.22338	1.27195	1.25064	1.26695	1.30393	1.318	1.3188	1.32533	1.36823	1.42708	1.31649	1.36279	1.48212	1.60198	1.88396	1.6093	0.774825	0.981631	1.0019	0.955732	0.859553	0.986092	0.986087	1.15694
1.09239	1.07048	1.10867	1.13902	1.13425	1.12856	1.14376	1.12827	1.15259	1.1554	1.13202	1.1454	1.12964	1.11702	1.11182	1.10667	1.08861	1.08173	1.05669	1.06541	1.06867	1.0575	1.06132	1.05072	1.0814	1.05817	1.05098	1.06456	1.0636	1.06263	1.06166	1.08323	1.08858	1.08991	1.10591	1.10452	1.10312	1.10884	1.11462	1.15204	1.25404	1.37585	1.52387	1.59645	1.72431	1.68292	1.64346	1.71007	1.72711	1.7114
1.31223	1.26747	1.52155	1.38716	1.41927	1.23314	1.52264	1.56533	1.59545	1.58613	1.69408	1.60024	1.63219	1.67974	1.61489	1.53816	1.55563	1.5735	1.36329	1.6218	1.54366	1.56528	1.49815	1.55396	1.54827	1.54262	1.50881	1.47645	1.46904	1.45677	1.44269	1.49576	1.48835	1.91277	2.67583	4.45172	1.35477	1.46523	1.5953	1.75072	1.76403	1.77755	1.79128	1.59894	1.67637	1.5739	1.64938	1.50915	1.55807	1.56545
																																						1.48102	1.55383	1.62064	1.67489	1.70831	1.82823	1.80956	1.84869	1.8551	1.78223	1.71668	1.73792
1.4753	1.49915	1.48346	1.46303	1.44068	1.45799	1.46209	1.47688	1.46578	1.44505	1.45289	1.48256	1.48232	1.45991	1.45622	1.44497	1.42683	1.41601	1.43421	1.46469	1.47362	1.49654	1.50526	1.54464	1.53752	1.55998	1.56939	1.57437	1.63092	1.6783	1.69649	1.71103	1.68934	1.76433	1.75551	1.81092	1.60253	1.64466	1.59801	1.64777	1.70072	1.85607	1.87774	1.88238	1.91616	1.93009	1.98181	1.95095	1.98918	1.95497
1.15523	1.15192	1.13529	1.14845	1.13702	1.12582	1.14842	1.15581	1.17594	1.19628	1.16728	1.178	1.14992	1.16271	1.18001	1.18695	1.18382	1.18072	1.20211	1.24724	1.25485	1.22805	1.21919	1.20688	1.22139	1.24529	1.26043	1.28945	1.28254	1.3093	1.34665	1.38182	1.40269	1.42601	1.4539	1.5756	1.40619	1.51098	1.45445	1.56686	1.63161	1.67726	1.7246	1.77469	1.77915	1.90944	1.31057	1.08919	0.931792	0.961253
1.07986	1.0727	1.13606	1.14361	1.07915	1.16953	1.16581	1.13895	1.15742	1.12528	1.14487	1.15892	1.1541	1.20603	1.18882	1.18607	1.09973	1.16848	1.15248	1.14858	1.14773	1.14689	1.14605	1.14563	1.13041	1.12703	1.10911	1.12682	1.14511	1.15613	1.15716	1.1257	1.09278	1.07508	1.04793	1.02212	0.982451	0.981208	0.950849	0.990172	0.999603	1.079	1.16047	1.20902	1.26538	1.18856	1.20255	1.19164	1.18297	1.20891
1.18242	1.24533	1.32136	1.3322	1.36301	1.4014	1.39876	1.39613	1.37993	1.43514	1.45159	1.46283	1.44926	1.48396	1.52036	1.52612	1.53192	1.60227	1.6059	1.59691	1.59861	1.62661	1.58938	1.5617	1.5957	1.63122	1.65976	1.71236	1.68538	1.71202	1.72134	1.73402	1.74689	1.79538	1.84665	1.90093	1.61836	1.68288	1.66158	1.69058	1.77985	1.79078	1.82695	1.87401	1.96051	1.98397	2.04318	2.03926	2.05655	2.11417
1.59374	1.51979	1.60413	1.55902	1.57937	1.54181	1.52428	1.55065	1.58252	1.66592	1.60091	1.57953	1.57673	1.5619	1.50443	1.50631	1.52365	1.52593	1.52009	1.54641	1.54604	1.5905	1.5994	1.62538	1.63832	1.64091	1.65714	1.66971	1.65575	1.6444	1.63725	1.67133	1.65785	1.67075	1.64632	1.79195	1.5892	1.66721	1.6097	1.61336	1.60355	1.72988	1.77314	1.8288	1.78862	1.81409	1.79133	1.81428	1.81481	1.80116
1.18592	1.04069	1.07857	1.10359	1.14531	1.0725	1.14202	1.13429	1.06943	1.18152	1.0954	1.11716	1.20964	1.12977	1.23262	1.12481	1.17318	1.2087	1.23217	1.38394	1.34886	1.32993	1.34218	1.4622	1.41101	1.44629	1.45947	1.43946	1.46041	1.50816	1.50384	1.60075	1.52171	1.65288	1.64466	2.28209	1.50731	1.72981	1.77555	1.82378	1.87968	1.91327	1.89897	1.87286	1.84724	1.89273	1.81284	1.90249	1.95443	1.93683
1.33417	1.26772	1.26428	1.22939	1.25429	1.21642	1.20832	1.25343	1.2182	1.26587	1.27447	1.28687	1.29371	1.28656	1.34216	1.3185	1.33333	1.36598	1.37654	1.36149	1.36571	1.39785	1.44863	1.45886	1.46079	1.44785	1.43013	1.45819	1.46707	1.4901	1.50787	1.51329	1.54187	1.59534	1.58757	1.71493	1.45267	1.65029	1.60513	1.11095	0.849433	0.878155	0.908888	0.94185	0.977293	1.18476	1.22005	1.28769	1.36328	1.44829
1.44216	1.45513	1.45517	1.42036	1.42776	1.4816	1.46946	1.46937	1.49074	1.49149	1.4876	1.52548	1.48593	1.49314	1.47343	1.49114	1.46525	1.45673	1.42635	1.36371	1.33692	1.33739	1.37668	1.32721	1.34196	1.30243	1.30415	1.30809	1.29495	1.3276	1.31801	1.31673	1.32926	1.32465	1.30012	1.29601	1.17648	1.2241	1.14219	1.20935	1.28491	1.38039	1.41797	1.45766	1.57919	1.59806	1.65993	1.72678	1.71223	1.68913
1.37915	1.35489	1.33082	1.29202	1.29078	1.27349	1.30373	1.30999	1.33164	1.32303	1.31002	1.30602	1.30831	1.29871	1.29002	1.30571	1.34826	1.32828	1.34522	1.34896	1.37201	1.36589	1.37875	1.41766	1.42169	1.40651	1.39027	1.3774	1.37994	1.39009	1.3928	1.41215	1.39246	1.39344	1.37326	1.43811	1.27162	1.29424	1.31768	1.29983	1.31964	1.32175	1.32386	1.32598	1.37374	1.33499	1.33483	1.33467	1.33451	1.36922
1.23562	1.22575	1.21604	1.19764	1.12693	1.16166	1.1986	1.20389	1.18202	1.20692	1.2329	1.26001	1.28289	1.28742	1.28406	1.29566	1.27941	1.2502	1.26857	1.28479	1.26038	1.30621	1.24093	1.30655	1.3268	1.29361	1.28844	1.28331	1.26588	1.24891	1.2324	1.19144	1.18965	1.18055	1.14366	1.16462	1.18636	1.19105	1.17574	1.21502	1.31209	1.4389	1.53094	1.56067	1.60845	1.58969	1.5951	1.58312	1.5869	1.62254
1.35828	1.37702	1.34421	1.31634	1.25925	1.3464	1.37113	1.37467	1.4017	1.3404	1.39181	1.42954	1.41946	1.41873	1.4181	1.39679	1.47395	1.46776	1.48297	1.45593	1.47291	1.49616	1.48172	1.46599	1.47838	1.37784	1.38117	1.3586	1.40036	1.31262	1.35049	1.35051	1.29791	1.33159	1.30488	1.34801	1.24806	1.25422	1.27957	1.23831	1.30894	1.35497	1.41424	1.4351	1.44986	1.46494	1.44984	1.49006	1.42983	1.40052
1.27521	1.30503	1.32043	1.31945	1.32399	1.32155	1.33411	1.3166	1.36607	1.39959	1.35669	1.36558	1.43856	1.41046	1.39649	1.46125	1.42728	1.46001	1.50351	1.48806	1.46103	1.43495	1.47032	1.47592	1.48157	1.5472	1.48104	1.55733	1.50682	1.46867	1.44964	1.45128	1.41055	1.45809	1.44961	1.47428	1.4998	1.52622	1.44152	1.5917	1.6255	1.71205	1.65395	1.67522	1.81505	1.71296	1.71119	1.73662	1.76282	1.72684
1.03087	1.04713	1.04098	1.05683	1.07735	1.05842	1.03863	1.05513	1.07215	1.06581	1.05174	1.02199	1.0684	1.06951	1.05966	1.09033	1.0906	1.11983	1.10406	1.12154	1.10454	1.10041	1.11325	1.06278	1.09537	1.09671	1.09721	1.11228	1.10298	1.10132	1.09387	1.11086	1.11783	1.11491	1.13185	1.167	1.13575	1.14902	1.15728	1.14682	1.2077	1.2754	1.30486	1.29532	1.34369	1.35027	1.33001	1.34875	1.36889	1.35129
1.67758	1.63101	1.62528	1.5689	1.5505	1.53252	1.49458	1.50945	1.48428	1.47824	1.47832	1.46197	1.45502	1.47603	1.45386	1.50077	1.50541	1.49798	1.47507	1.46949	1.47071	1.47551	1.45256	1.45652	1.45495	1.45678	1.45978	1.4614	1.48304	1.49552	1.52312	1.55218	1.5243	1.5098	1.52158	1.59172	1.43032	1.44679	1.43393	1.45587	1.47057	1.50598	1.49908	1.53425	1.55485	1.52451	1.54627	1.53697	1.5278	1.54064
1.00245	1.04336	1.06169	1.08068	1.04952	1.02011	0.982062	0.984103	0.979405	1.01051	0.988292	1.00516	1.00435	1.01631	1.05446	1.0487	1.04301	1.03352	1.06532	1.06228	1.08106	1.06613	1.08873	1.11197	1.13622	1.16163	1.20386	1.26049	1.27138	1.25751	1.25469	1.31546	1.36573	1.41999	1.45242	1.98161	1.24783	1.40757	1.41436	1.42122	1.42814	1.44289	1.45091	1.47477	1.49942	1.58819	1.50943	1.5717	1.55915	1.68222
1.44113	1.46965	1.42705	1.41187	1.40273	1.3776	1.41931	1.42748	1.46388	1.40992	1.49802	1.4579	1.48715	1.51798	1.55012	1.58278	1.56178	1.57276	1.61219	1.61611	1.62313	1.66014	1.57964	1.58624	1.58682	1.58542	1.59858	1.51298	1.66261	1.55792	1.60423	1.52667	1.52437	1.52924	1.56266	1.43814	1.33201	1.6128	1.71291	1.7697	1.87033	1.9831	2.00816	1.82508	1.97599	2.19407	2.46626	2.36742	2.43028	2.52528
0.941702	0.890994	0.888738	0.88631	0.878392	0.855378	0.873465	0.900267	0.882279	0.869206	0.878436	0.903527	0.930092	0.949233	0.942685	0.954708	0.926634	0.900164	0.871342	0.844307	0.88015	0.796207	0.81823	0.794499	0.772106	0.750941	0.853095	0.811285	0.845864	0.859397	0.9062	0.873598	0.843261	0.788468	0.912209	0.660987	0.932457	0.97125	1.01341	1.00549	1.01411	1.05414	1.07662	1.11254	1.14559	1.09764	1.08596	1.0353	0.965032	0.940335
																																										1.91513	1.89106	1.77473	1.67187	1.64277	1.61467	1.72134	1.61248
1.71203	1.5227	1.61683	1.65131	1.56835	1.47244	1.40704	1.58964	1.68929	1.44972	1.55983	1.36538	1.72204	1.48886	1.48706	1.43428	1.7596	1.6662	1.60478	2.07918	1.66177	1.52652	1.70217	1.89808	2.00944	1.92118	1.73119	1.82691	1.99298	2.08188	2.03952	2.15505	2.04991	2.09842	2.22366	2.96654	1.96017	2.40273	2.71727	2.90098	3.05106	3.23504	3.94205	3.73748	3.85995	3.58383	3.89405	4.26307	4.64143	4.19467
1.05537	0.994491	0.915394	0.867946	0.8382	0.847582	0.809817	0.835586	0.839534	0.841475	0.81759	0.841951	0.878956	0.908975	0.941117	0.90006	0.928139	0.951565	0.997608	0.958454	0.975535	0.924208	0.980119	0.968911	1.00756	1.07008	1.07066	1.06938	1.13326	1.14031	1.17163	1.17138	1.21202	1.20552	1.23169	1.27464	1.25672	1.28273	1.25355	1.31091	1.42783	1.528	1.54779	1.58269	1.6112	1.53635	1.5301	1.58854	1.6028	1.59678
1.12264	1.1249	1.08645	1.0941	1.11925	1.12644	1.12571	1.1236	1.14169	1.15327	1.1597	1.15063	1.18255	1.18429	1.14627	1.20475	1.17654	1.1755	1.17362	1.17997	1.16199	1.19459	1.22907	1.25381	1.27167	1.2874	1.29205	1.30198	1.30063	1.29231	1.29522	1.28233	1.34398	1.4124	1.40711	1.48474	1.32886	1.3823	1.36034	1.37911	1.45332	1.50876	1.493	1.59016	1.62513	1.62184	1.68685	1.74885	1.82128	1.89996
0.537553	0.57157	0.499545	0.44364	0.443686	0.483958	0.436387	0.463489	0.453305	0.462594	0.457816	0.479359	0.462906	0.463285	0.480219	0.488982	0.485192	0.486367	0.487548	0.488734	0.489546	0.490361	0.497038	0.501525	0.50431	0.490502	0.500655	0.481269	0.453323	0.496791	0.564386	0.626565	0.655439	0.692336	0.863222	0.792424	0.878354	1.19445	1.17666	1.25219	1.33807	1.43249	1.35536	1.28611	1.62935	1.5787	1.72199	1.69732	1.85205	1.91662
1.31202	1.2554	1.22967	1.19187	1.21177	1.21152	1.19903	1.22461	1.2513	1.19461	1.18171	1.20927	1.16712	1.15867	1.1893	1.20574	1.19712	1.18708	1.15374	1.16315	1.11085	1.15282	1.14411	1.18114	1.19021	1.18438	1.1786	1.17216	1.16466	1.19119	1.1463	1.10373	1.13936	1.10472	1.11034	1.11602	1.12175	1.11345	1.15685	1.20111	1.26966	1.37667	1.42877	1.46061	1.49391	1.52875	1.48361	1.51744	1.55285	1.59071
1.33708	1.27897	1.27233	1.33734	1.36865	1.33443	1.34864	1.36315	1.40145	1.35138	1.3675	1.34298	1.29598	1.28847	1.36442	1.28521	1.35761	1.32604	1.38829	1.36611	1.42107	1.47722	1.45564	1.43468	1.56831	1.40139	1.39465	1.42593	1.4795	1.34939	1.33427	1.41269	1.42078	1.50389	1.41565	2.45436	1.25617	1.39375	1.45161	1.4189	1.44464	1.47133	1.48149	1.40937	1.42985	1.42189	1.44364	1.46688	1.49683	1.45766
1.46614	1.49398	1.44437	1.4193	1.42364	1.40886	1.43825	1.41303	1.38593	1.35341	1.41	1.40932	1.35971	1.35789	1.32832	1.34075	1.36533	1.29606	1.29204	1.28365	1.30514	1.32088	1.32595	1.28484	1.32572	1.30946	1.29726	1.29872	1.27882	1.32376	1.24182	1.25147	1.26126	1.281	1.24046	1.29784	1.19804	1.24204	1.1779	1.29352	1.35099	1.45392	1.53817	1.61254	1.6304	1.65234	1.62123	1.62505	1.61085	1.61765
1.19614	1.21609	1.24791	1.22515	1.22008	1.23073	1.25768	1.28368	1.31078	1.32551	1.32807	1.31896	1.30972	1.31866	1.31409	1.30954	1.33452	1.32092	1.31286	1.30382	1.31454	1.3059	1.29502	1.33327	1.37384	1.3452	1.35692	1.36885	1.38099	1.39335	1.40593	1.44314	1.51037	1.43772	1.46403	1.49219	1.52144	1.55187	1.57492	1.59866	1.62313	1.69271	1.74444	1.79944	1.80713	1.8164	1.83801	1.86015	1.88282	1.90605
	1.60321	1.6317	1.58772	1.60201	1.63165	1.4839	1.42971	1.43626	1.44286	1.44953	1.43823	1.46532	1.47004	1.4748	1.44927	1.44115	1.39875	1.39703	1.36162	1.33401	1.27951	1.3348	1.28725	1.27125	1.26377	1.24241	1.22175	1.25019	1.27998	1.23406	1.22473	1.21554	1.22906	1.17721	1.19159	1.13011	1.11225	1.11047	1.12684	1.2453	1.29565	1.35025	1.33911	1.4067	1.48581	1.57435	1.5607	1.5481	1.53571
	1.97098	2.09777	2.242	1.79718	1.49964	1.28663	1.12661	1.31834	1.58871	1.99859	2.6935	2.69641	2.69932	2.79428	2.63219	2.64539	2.378	2.56779	2.33826	2.1464	2.39904	2.32689	2.25896	2.40317	2.32247	2.247	2.4419	2.22884	2.26272	2.29765	2.33368	2.01815	1.77778	1.58858	1.43577	1.30978	0.958994	1.8116	1.93418	2.07455	2.23689	2.13621	2.0442	1.95979	1.87034	1.7887	1.71389	1.72249	1.38617
		0.946095	0.979919	1.01625	1.05538	1.13349	1.19442	1.26227	1.33736	1.30662	1.31984	1.26857	1.35022	1.34051	1.35283	1.32065	1.29471	1.27634	1.26529	1.44243	1.50264	1.43966	1.53657	1.25866	0.934269	0.988103	0.983934	1.02475	1.06752	1.06074	1.09333	1.08315	1.05948	1.35329	1.51474	1.20297	1.09648	1.0472	1.40509	1.53498	1.52557	1.53419	1.56964	1.50556	1.46828	1.43069	1.68142	1.72127	1.90727
		1.75464	1.72693	1.76902	1.76138	1.75381	1.7463	1.73886	1.87557	1.88581	1.75044	1.55621	1.53184	1.42209	1.50663	1.58768	1.63815	1.63281	1.68777	1.5781	1.56805	1.61317	1.57355	1.5997	1.72978	1.68226	1.4188	1.55657	1.47902	1.58454	1.49997	1.56125	1.85557	1.97181	3.38015	1.80157	2.08103	1.92805	2.77585	1.88363	2.05158	2.06758	2.17977	2.272	2.18568	2.34914	2.27467	2.13234	2.07158
			0.803993	1.09558	1.08514	1.154	1.14394	1.23065	1.33159	1.45057	1.43337	1.44714	1.47132	1.4709	1.53399	1.44057	1.38389	1.30795	1.3001	1.25393	1.26139	1.2544	1.23321	1.23043	1.23378	1.24558	1.25278	1.28047	1.31918	1.29487	1.35153	1.4105	1.40888	1.44246	1.5876	1.36519	1.39505	1.40281	1.3834	1.53017	1.57712	1.57373	1.58069	1.57404	1.6157	1.66125	1.68928	1.72293	1.69448
			1.66252	1.63302	1.60455	1.60583	1.60243	1.51446	1.51138	1.50707	1.54542	1.55997	1.57479	1.59107	1.55796	1.76716	1.75204	1.75229	1.75254	1.75346	1.79716	1.77242	1.81989	1.99053	1.75733	1.76671	1.74254	1.76665	1.83048	1.84871	1.88973	1.86568	1.92495	1.97991	2.78669	1.81359	2.07605	2.07907	2.08211	2.04058	2.0608	2.64627	2.3008	2.41038	2.53093	2.51678	2.60405	2.69759	2.41025
				0.777345	0.956115	0.959062	0.951405	1.0197	1.09855	1.10216	1.19738	1.23927	1.28419	1.28087	1.22731	1.18898	1.16228	1.18544	1.13035	1.15958	1.1336	1.1051	1.16648	1.16365	1.18144	1.21645	1.2474	1.20342	1.25027	1.30092	1.24498	1.32113	1.30835	1.29583	1.49495	1.35707	1.34752	1.4131	1.46118	1.51264	1.60424	1.64901	1.62926	1.69499	1.71819	1.73225	1.76977	1.77154	1.77332
					1.45049	1.44377	1.43712	1.43053	1.42399	1.41752	1.4111	1.40474	1.39844	1.3922	1.45984	1.49247	1.52659	1.56231	1.59974	1.59799	1.59624	1.62112	1.52657	1.5376	1.57535	1.54715	1.57726	1.59561	1.64558	1.60225	1.61982	1.59295	1.62396	1.83001	2.09596	1.92347	1.77721	1.82794	1.87722	1.85536	1.86517	1.82466	1.83935	1.84112	1.8429	1.84436	1.84582	1.84728	1.84874
					1.07346	1.11655	1.10127	1.06108	1.02373	0.988912	0.956388	0.961974	0.941934	0.946628	0.933588	0.949344	0.930977	0.926493	0.922053	0.923492	0.938652	0.926801	0.946351	0.938169	0.950301	0.96275	0.976879	1.00487	0.998231	1.01758	1.02582	1.02914	1.03839	1.06244	1.14994	1.10872	1.14315	1.11598	1.20459	1.34489	1.46303	1.54031	1.50112	1.47624	1.41067	1.37659	1.33522	1.31796	1.36064
																																											1.48365	1.58246	1.69537	1.91613	1.79212	1.68317	1.58672
																														0.811869	0.838118	0.86612	0.896059	0.928142	0.962607	0.99973	1.03983	1.08329	1.13053	1.1683	1.13029	1.34583	1.25422	1.33226	1.42066	1.39743	1.37495	1.38156	1.38823
																																					1.19181	1.23588	1.26617	1.29756	1.33055	1.36527	1.40184	1.43334	1.43944	1.44559	1.45272	1.43055	1.40905
																																										1.31321	1.33361	1.35466	1.37638	1.39881	1.42198	1.44594	1.47071
																																											1.95247	1.95112	1.94977	2.01587	1.88001	1.87395	1.86794
Tx dose: 10000ng INS
0.940183	0.95298	0.898586	0.93058	0.90491	0.91232	0.959149	1.00301	1.00515	0.996621	0.991941	0.993845	1.05277	1.04169	1.03651	1.00712	1.00315	0.970281	0.977442	0.943117	1.01978	1.03119	1.02566	0.968088	0.948053	0.943581	0.952296	0.902003	0.967018	0.922446	0.936505	0.875938	0.834919	0.8153	0.781139	0.763146	0.809895	0.843558	0.844029	0.908133	0.992615	1.00518	1.07152	1.10486	1.14162	1.13837	1.14948	1.17602	1.1663	1.18116
1.3131	1.28009	1.29362	1.29511	1.31306	1.30609	1.32525	1.30551	1.28635	1.27203	1.24258	1.22358	1.20836	1.22881	1.25204	1.28731	1.33682	1.35558	1.40876	1.44311	1.47316	1.3408	1.4116	1.37177	1.32661	1.30009	1.35802	1.28529	1.36159	1.36802	1.41047	1.4061	1.40211	1.389	1.41594	1.67698	1.27291	1.39515	1.40746	1.42305	1.43898	1.45527	1.47194	1.489	1.50645	1.52432	1.54262	1.54766	1.5536	1.394
1.199	1.18024	1.15426	1.16978	1.16774	1.14206	1.13118	1.1157	1.07957	1.08509	1.06965	1.09376	1.10838	1.11503	1.12254	1.12363	1.13044	1.13897	1.15274	1.17038	1.15798	1.13695	1.13988	1.12934	1.09896	1.09778	1.07102	1.06669	1.07407	1.0578	1.03477	1.03288	1.0316	1.04785	1.02348	1.03615	1.03203	1.03348	1.00356	1.03332	1.06684	1.11813	1.1629	1.21668	1.26645	1.31161	1.35425	1.37168	1.40055	1.4297
1.6768	1.61517	1.58541	1.53276	1.528	1.51417	1.49581	1.49583	1.49433	1.50502	1.51955	1.47772	1.4982	1.49999	1.51387	1.53141	1.54615	1.57643	1.58916	1.55491	1.55943	1.5976	1.58781	1.62647	1.67279	1.66773	1.65773	1.66666	1.67388	1.72996	1.7027	1.69469	1.68872	1.67809	1.74614	1.74643	1.55223	1.57142	1.52862	1.49769	1.48593	1.47311	1.44643	1.47896	1.52282	1.54689	1.61932	1.59329	1.56121	1.61877
1.38309	1.20261	1.15699	1.17562	1.18518	1.18463	1.19369	1.20857	1.22381	1.26312	1.26809	1.27886	1.28116	1.29489	1.29211	1.32213	1.31627	1.40179	1.27746	1.36915	1.4282	1.43967	1.45304	1.44123	1.48268	1.5251	1.50778	1.62468	1.58646	1.87984	1.9435	1.53936	1.67635	1.69489	1.5052	2.74259	1.45702	2.28314	3.03738	2.64908	1.81924	1.93296	2.58742	3.02168	2.93404	1.67297	1.75372	1.71005	1.76872	1.6584
1.11893	1.14579	1.12685	1.12194	1.10632	1.10085	1.09338	1.05942	1.05297	1.01406	1.00538	0.999462	0.98794	1.01828	1.02086	1.01129	1.00399	1.01462	1.01144	1.02446	1.01886	1.04061	1.02249	1.01324	1.03835	1.01712	1.01973	0.998344	1.00101	0.97402	0.980174	0.968157	0.976414	0.961941	0.947707	0.927961	0.920984	0.912197	0.941712	0.983221	1.0226	1.06671	1.10707	1.09513	1.13119	1.18465	1.20995	1.24884	1.25888	1.25769
1.12256	1.19862	1.2595	1.19453	1.17463	1.11349	1.15644	1.14714	1.12582	1.10621	1.08727	1.14385	1.10357	1.13757	1.04093	1.17613	1.12023	1.16724	1.1898	1.21894	1.193	1.26094	1.24574	1.23134	1.33403	1.32069	1.37254	1.33048	1.38619	1.40027	1.45967	1.49666	1.48331	1.48975	1.50293	1.81764	1.37066	1.45062	1.54048	1.64221	1.62925	1.65715	1.56648	1.60375	1.65849	1.59996	1.71796	1.6925	1.66192	1.70024
1.62544	1.58789	1.57338	1.56158	1.54692	1.55883	1.57021	1.58109	1.60274	1.60463	1.57433	1.60293	1.62479	1.66189	1.6456	1.68732	1.67382	1.6524	1.63826	1.70688	1.66855	1.67275	1.64531	1.63268	1.61026	1.62075	1.64294	1.64255	1.68941	1.70401	1.71584	1.69489	1.66682	1.64751	1.67507	1.75647	1.57028	1.64537	1.65668	1.61947	1.74564	1.82307	1.85132	1.85095	1.83483	1.84634	1.944	1.88932	1.90455	1.94533
1.26983	1.23645	1.22577	1.20774	1.21637	1.2064	1.25777	1.19264	1.19895	1.17706	1.19052	1.2077	1.19966	1.23343	1.25788	1.22259	1.2138	1.19816	1.25094	1.26374	1.27014	1.27377	1.25063	1.25877	1.26698	1.25446	1.20679	1.25373	1.28494	1.32704	1.34547	1.33288	1.31516	1.37683	1.33378	1.3774	1.23746	1.32003	1.31613	1.30501	1.32826	1.38034	1.43915	1.48701	1.49589	1.48071	1.48887	1.49013	1.53668	1.53396
1.21744	1.20356	1.1738	1.19069	1.17711	1.20204	1.20343	1.22582	1.23444	1.23825	1.23363	1.25362	1.26623	1.29166	1.29957	1.30997	1.31475	1.32611	1.3221	1.33748	1.3535	1.37259	1.35329	1.35025	1.35592	1.34629	1.3384	1.35211	1.35158	1.37048	1.4012	1.43333	1.48434	1.57731	1.62424	1.8058	1.5912	1.66568	1.60404	1.59327	1.65776	1.68703	1.74978	1.76973	1.81181	1.85427	1.93168	1.92761	1.9274	1.96093
1.01871	1.0052	1.0026	0.979038	1.00318	0.960248	0.972797	0.975404	0.976092	0.99208	0.972221	0.966562	0.993517	0.983822	0.989964	1.00698	1.02458	1.03579	1.03606	1.03895	1.04295	1.04851	1.00494	0.999754	0.981429	0.992808	0.978272	0.98708	0.96985	0.967383	0.979604	0.989475	0.998832	1.02445	1.04396	1.01483	1.01659	1.01644	1.01135	1.02296	1.11752	1.19186	1.23629	1.25033	1.32024	1.37316	1.41156	1.46022	1.48677	1.50057
1.23998	1.17899	1.16622	1.13609	1.14072	1.15112	1.1604	1.11311	1.08783	1.14266	1.11815	1.15958	1.15615	1.17448	1.1387	1.20481	1.17898	1.19269	1.18569	1.12984	1.16693	1.14951	1.14609	1.14951	1.18244	1.18042	1.24216	1.24891	1.26734	1.37216	1.38429	1.45756	1.47211	1.52772	1.58721	1.67731	1.47887	1.5469	1.49077	1.53064	1.48328	1.53231	1.51826	1.57899	1.5554	1.52547	1.55038	1.50675	1.52639	1.58566
1.05001	1.04001	1.01375	1.00684	1.00535	0.996374	1.00158	0.989239	0.987767	0.982271	0.987227	1.01366	0.994953	1.00798	0.983096	0.965065	0.960924	0.9672	0.958623	0.959255	0.945552	0.965184	0.95476	0.949577	0.940473	0.964116	0.966979	0.961398	0.945553	0.993036	1.00506	0.983423	1.01113	1.02068	1.04293	1.02815	1.02541	1.04618	1.02666	1.03794	1.09421	1.16199	1.28571	1.39386	1.44746	1.51552	1.5742	1.60289	1.65828	1.64993
1.14337	1.12824	1.12066	1.10396	1.08726	1.09939	1.09894	1.11682	1.11802	1.11049	1.18709	1.17566	1.19155	1.22715	1.2239	1.24224	1.27827	1.23585	1.29862	1.33793	1.36624	1.36411	1.43271	1.44043	1.46342	1.44651	1.44682	1.39586	1.36217	1.38632	1.34813	1.32446	1.38213	1.417	1.45708	1.39162	1.33178	1.41692	1.38827	1.47171	1.51622	1.56081	1.60928	1.61337	1.66025	1.68494	1.76305	1.73771	1.701	1.71407
1.18159	1.1764	1.18748	1.19866	1.20121	1.22311	1.23158	1.24765	1.27261	1.29583	1.24877	1.27672	1.27533	1.26562	1.25993	1.3256	1.31993	1.33448	1.3725	1.4486	1.44445	1.4334	1.47289	1.47966	1.49497	1.44277	1.48847	1.44235	1.4976	1.42439	1.49089	1.5149	1.4849	1.49418	1.44538	1.62337	1.47343	1.54716	1.54263	1.56302	1.5349	1.54272	1.57221	1.59378	1.65246	1.62696	1.68354	1.71934	1.72444	1.74048
1.66432	1.64864	1.59167	1.56881	1.58522	1.55987	1.51204	1.53649	1.51874	1.52532	1.5715	1.58409	1.55075	1.59702	1.61836	1.61722	1.59932	1.59728	1.60809	1.61021	1.64244	1.62506	1.62142	1.59925	1.55569	1.59736	1.6232	1.68786	1.70452	1.78654	1.83164	1.48674	1.25114	1.08	0.92334	0.96787	1.01691	0.980298	0.945132	1.23816	1.19681	1.20189	1.43478	1.5715	1.8923	1.99915	2.02956	2.18586	2.15081	2.10964
0.99779	0.97404	1.00907	1.00927	0.997962	1.01242	0.958948	0.97869	1.01329	0.982168	0.977916	1.01694	1.03129	1.02343	1.02952	1.00844	0.985175	1.01186	1.01471	0.995068	1.01936	1.05787	1.03673	1.02772	1.05435	1.09096	1.05782	1.05479	1.06148	1.0496	1.03959	1.03215	1.07309	1.12423	1.13511	1.16674	1.20019	1.2156	1.19843	1.24689	1.2397	1.40365	1.42007	1.46596	1.5503	1.57676	1.53519	1.56772	1.53996	1.57381
1.14993	1.19559	1.18663	1.17945	1.20128	1.1752	1.1342	1.20871	1.17365	1.1525	1.17743	1.16352	1.18765	1.21049	1.22144	1.22169	1.25937	1.25548	1.2293	1.25648	1.25418	1.26127	1.40004	1.49039	1.57757	1.60516	1.64573	1.65957	1.67366	1.75728	1.73869	1.69962	1.74305	1.73881	1.73334	2.05042	1.54128	1.69682	1.57389	1.56084	1.58859	1.61827	1.60758	1.66796	1.66766	1.67935	1.73993	1.65286	1.7397	1.81483
1.12746	1.13098	1.24833	1.15291	1.13291	1.15122	1.09844	1.06787	1.05511	1.07893	1.13567	1.10271	1.11646	1.14189	1.11914	1.09171	1.12572	1.09381	1.16027	1.14734	1.16888	1.16513	1.17734	1.35677	1.47916	1.4888	1.46568	1.37249	1.33382	1.28749	1.34498	1.35709	1.37537	1.39414	1.37662	1.3195	1.30368	1.26849	1.29755	1.36195	1.45949	1.57207	1.70347	1.72588	1.80022	1.8675	1.91564	1.79436	1.80809	1.85966
1.40351	1.43061	1.44592	1.39499	1.36655	1.37564	1.34488	1.35552	1.36724	1.35765	1.33973	1.33091	1.35534	1.39605	1.43726	1.42343	1.43707	1.44736	1.47911	1.45969	1.52265	1.50106	1.50863	1.54518	1.64941	1.70423	1.69568	1.79554	1.78428	1.78005	1.77095	1.75935	1.72748	1.6291	1.60233	1.78489	1.49559	1.66525	1.76039	1.81119	1.77908	1.69747	1.66367	1.67771	1.7642	1.77098	1.76884	1.8133	1.8341	1.87949
1.06781	1.0873	1.07508	1.09253	1.09745	1.20128	1.17954	1.16928	1.13026	1.24467	1.25615	1.32948	1.31255	1.31825	1.44785	1.46504	1.48265	1.50069	1.45457	1.54033	1.63806	1.42147	1.35002	1.4911	1.51441	1.46223	1.49785	1.56941	1.66648	1.66713	1.82916	1.64174	2.00983	1.84384	1.92498	3.60998	1.64489	2.10935	2.08205	1.93445	2.32926	2.1675	2.24803	2.26483	2.28188	2.23611	2.46959	2.21824	2.42626	2.24143
1.06593	1.07709	1.06798	1.09035	1.07999	1.08419	1.0782	1.10786	1.10859	1.14335	1.14267	1.13767	1.1885	1.20581	1.20529	1.22555	1.22442	1.24436	1.25983	1.29509	1.3288	1.34753	1.3754	1.42361	1.43924	1.50036	1.54586	1.52889	1.62207	1.61199	1.65438	1.70016	1.75289	1.74091	1.73885	1.9743	1.57124	1.60042	1.55979	1.55137	1.57893	1.69694	1.83939	1.91734	2.00524	2.15983	2.22227	2.27817	2.12804	2.24059
0.987378	0.985955	0.960093	1.00212	1.00348	0.977193	0.968444	0.958082	0.994208	0.97472	0.976333	0.966127	0.97985	0.962334	1.00366	1.00999	0.998966	0.971006	0.998965	0.983918	0.995667	0.99902	1.01142	1.01507	1.05202	0.993567	1.04654	1.0427	1.02479	1.01015	1.01156	0.979776	1.03826	1.03775	1.05345	1.06422	1.07522	1.11791	1.15497	1.19745	1.21919	1.24899	1.28029	1.3132	1.398	1.50005	1.62549	1.6584	1.65146	1.64459
1.10898	1.1604	1.17935	1.14948	1.1752	1.24829	1.19018	1.2528	1.22682	1.23632	1.24039	1.23736	1.25245	1.23803	1.25095	1.234	1.24886	1.25736	1.28057	1.31543	1.32198	1.37216	1.43654	1.3993	1.45241	1.42379	1.43805	1.49634	1.4721	1.43677	1.47442	1.50495	1.52631	1.48637	1.51736	1.58654	1.45224	1.5691	1.5807	1.85173	2.07162	1.0118	1.01659	1.02143	1.13614	1.14843	1.17194	1.19644	1.22198	1.20059
0.570078	0.570839	0.571602	0.572368	0.573135	0.573905	0.574676	0.73306	0.774751	0.815337	0.812086	0.80886	0.805359	0.777709	0.777859	0.791965	0.811965	0.790897	0.776256	0.821636	0.800177	0.821819	0.826198	0.789865	0.804318	0.820952	0.827156	0.831334	0.839437	0.80858	0.825923	0.858975	0.896509	0.910378	0.915135	0.916837	0.946001	0.973731	1.00567	1.0307	1.10209	1.1136	1.13308	1.20167	1.21039	1.20981	1.22302	1.21272	1.21615	1.25784
0.876998	0.893983	0.906533	0.938232	0.934337	0.939484	0.956195	0.937199	0.94813	0.896414	0.927165	0.91278	0.883023	0.931645	0.921595	0.950944	0.976391	0.97713	0.969735	0.970295	0.987594	0.972589	0.985809	0.959824	1.01662	1.05234	1.07069	1.10136	1.0665	1.04976	1.04538	1.03042	0.990264	0.937598	0.939321	0.926667	0.944512	0.972899	0.992409	1.04539	1.1142	1.16847	1.21288	1.2229	1.23755	1.24844	1.25567	1.22962	1.21828	1.20035
	1.06614	1.11029	1.0617	1.27525	1.11375	1.062	1.1713	1.08067	1.13847	1.10106	1.15425	1.20083	1.24194	1.23476	1.30971	1.37108	1.39546	1.60859	1.62156	1.14969	1.14541	1.26107	1.40271	1.47839	1.76844	1.75745	1.51486	1.50517	1.53047	1.71443	1.7282	2.11798	1.92306	1.78353	2.1171	1.74037	2.24194	2.22396	2.20558	2.15969	2.41499	2.30005	2.12325	2.14322	2.52313	2.48231	2.49742	2.21992	2.54332
1.11128	1.27658	1.13466	1.12033	1.13654	1.18459	1.15369	1.12887	1.15249	1.11495	1.21649	1.17672	1.17381	2.32973	1.57634	2.14471	1.08874	1.16368	1.17404	1.14102	1.09406	1.12097	1.06004	1.09816	1.1119	1.46177	1.68247	1.14621	1.22025	2.54861	2.19906	3.18225	3.96777	1.99263	1.19666	6.26178	2.3462	2.69163	2.83665	2.38389	3.76166	4.64152	4.4092	5.36193	4.85838	4.83264	5.223	5.02035	4.78547	4.74663
1.32701	1.3491	1.3394	1.36397	1.35691	1.4261	1.44261	1.45968	1.44691	1.46617	1.45761	1.43425	1.43012	1.3741	1.32485	1.30998	1.34106	1.3552	1.36729	1.36549	1.31961	1.33094	1.31928	1.32207	1.36714	1.37365	1.4065	1.40614	1.43132	1.49106	1.50966	1.46848	1.4672	1.45607	1.41376	1.44892	1.38685	1.40996	1.439	1.45576	1.54396	1.52323	1.64555	1.55873	1.67611	1.75062	1.79436	1.81922	1.6705	1.59328
1.10428	1.09359	1.07967	1.07157	1.05912	1.06528	1.07087	1.08457	1.08996	1.08919	1.11987	1.13822	1.14426	1.15293	1.15456	1.14048	1.16724	1.20662	1.17105	1.19461	1.2252	1.20269	1.21616	1.24284	1.2718	1.31976	1.3305	1.39957	1.46548	1.51756	1.5116	1.5397	1.49513	1.48769	1.44166	1.41904	1.32468	1.32437	1.31348	1.3478	1.38188	1.45228	1.48761	1.53862	1.56772	1.53453	1.60746	1.54725	1.57704	1.60799
1.01318	1.06165	1.11563	1.1754	1.24194	1.29853	1.36053	1.42875	1.3374	1.3528	1.36855	1.33313	1.34633	1.35979	1.32722	1.29617	1.27078	1.27327	1.27094	1.26107	1.28904	1.22751	1.23991	1.26417	1.2894	1.31209	1.3356	1.36561	1.32621	1.37036	1.44457	1.47494	1.47905	1.53842	1.55834	1.8103	1.49019	1.64033	1.71613	1.728	1.69101	1.72889	1.78016	1.78995	1.82349	1.87914	1.88476	1.89042	1.88041	1.8755
1.00952	1.01117	1.01695	0.998177	0.991224	0.98876	0.99972	1.01235	1.02722	1.0164	1.03973	1.04144	1.02296	1.01864	1.02604	1.0135	1.02706	1.03177	1.07656	1.06263	1.10146	1.10215	1.11777	1.1452	1.15742	1.15479	1.15571	1.18176	1.16563	1.1198	1.11132	1.11178	1.09921	1.054	1.04531	1.03614	1.0501	1.05108	1.06381	1.02708	1.09661	1.17746	1.15605	1.23893	1.28719	1.30972	1.33306	1.3573	1.3609	1.37949
1.10095	1.12954	1.10388	1.06178	1.10211	1.13138	1.10926	1.15198	1.08387	1.09431	1.04032	1.01994	0.97466	1.02153	1.01986	1.00275	0.973907	1.07707	0.973856	0.971122	0.993257	0.967078	0.959808	0.956101	0.941979	0.928269	0.944041	0.938647	0.933314	0.949384	0.923148	0.925231	0.903374	0.933525	0.959527	0.895972	0.930404	0.9018	0.919508	0.950386	1.03056	1.11271	1.20908	1.20983	1.33484	1.27671	1.598	1.57089	1.49387	1.42405
	1.20705	1.35683	1.17976	1.2165	1.15627	1.15337	1.29231	1.17598	1.17399	1.15943	1.161	1.22784	1.17815	1.15743	1.20248	1.24027	1.27231	1.28297	1.2929	1.28976	1.28664	1.2894	1.34438	1.3534	1.35658	1.35978	1.36299	1.31251	1.40765	1.41475	1.42193	1.41541	1.42731	1.42392	1.40318	1.38303	1.52361	1.48218	1.44295	1.40574	1.45108	1.47752	1.51143	1.52162	1.58804	1.61591	1.60919	1.62464	1.64316
1.17441	1.16255	1.18467	1.16636	1.19503	1.21568	1.22341	1.2206	1.23494	1.2146	1.23803	1.21301	1.2328	1.22233	1.22545	1.24087	1.26938	1.32277	1.28928	1.32602	1.26216	1.31918	1.36022	1.35499	1.38284	1.35653	1.35194	1.34405	1.33629	1.36241	1.31131	1.32546	1.37203	1.36388	1.3981	1.58812	1.32908	1.40781	1.47126	1.49683	1.60725	1.59606	1.63664	1.68323	1.73416	1.70508	1.68094	1.67727	1.67606	1.69953
0.990406	0.982024	0.941205	0.941276	0.941347	0.902773	0.922135	0.942346	0.907135	0.958724	0.958649	0.945038	0.929311	0.973739	1.00048	1.00223	1.06542	1.11207	1.16298	1.16109	1.2673	1.2745	1.20641	1.14523	1.20118	1.16327	1.12768	1.0942	1.15422	1.13615	1.16081	1.18656	1.30166	1.35381	1.38818	1.47629	1.37273	1.41209	1.39121	1.37095	1.35806	1.46573	1.5986	1.70649	1.67892	1.73766	1.74981	1.83644	1.88952	1.87701
1.06325	1.03754	1.04601	0.997883	0.973775	0.966461	0.993755	0.965176	0.967916	0.96003	0.965211	0.967627	0.957434	0.966518	0.95446	0.9682	0.95074	0.942589	0.945272	0.959198	0.941734	0.949211	0.926993	0.956291	0.955191	0.954093	0.964723	0.964238	0.960087	0.927675	0.91559	0.901756	0.880636	0.876649	0.856679	0.75967	0.813384	0.813911	0.771386	0.819636	0.874326	0.918972	0.933076	1.02867	1.09414	1.12455	1.16067	1.1657	1.17077	1.18316
1.38672	1.31587	1.31566	1.31574	1.24725	1.26738	1.21238	1.2093	1.18139	1.17024	1.17326	1.16856	1.17773	1.19795	1.21342	1.1976	1.19167	1.20696	1.19072	1.24008	1.24745	1.22489	1.22743	1.19857	1.17104	1.16315	1.14381	1.18267	1.17549	1.23183	1.30909	1.53324	1.68943	1.47318	1.46696	1.46205	1.34827	1.46951	1.21177	1.21581	1.32588	1.49555	1.55975	1.54548	1.46554	1.43833	1.36031	1.38805	1.32599	1.36793
1.11024	1.10662	1.065	1.07273	1.05645	1.0559	1.0522	1.03842	1.04868	1.03259	1.05761	1.07893	1.10113	1.13399	1.16567	1.15788	1.18049	1.21297	1.2238	1.22505	1.2263	1.26714	1.26995	1.27436	1.29857	1.32265	1.3231	1.38666	1.45663	1.47003	1.50237	1.52708	1.50665	1.4221	1.39546	1.33444	1.27854	1.28631	1.30934	1.32547	1.36231	1.46963	1.53204	1.59997	1.63643	1.67199	1.70284	1.70578	1.67928	1.66461
1.01767	1.0017	0.961571	0.974882	0.98009	0.952463	0.93921	0.951207	0.966256	0.975031	0.967833	0.997691	0.975863	0.975217	0.976913	0.997963	0.986207	0.984333	0.988339	1.01211	1.04469	1.04435	1.05204	1.03301	1.02162	0.99599	0.994856	1.00903	0.992494	0.965906	0.992582	0.99452	1.04577	1.07668	1.11075	1.08153	1.07317	1.06486	1.07755	1.12497	1.19734	1.28762	1.36581	1.40529	1.45755	1.52803	1.56726	1.59123	1.59881	1.56515
0.966155	0.942682	0.917498	0.916797	0.878999	0.911871	0.949326	0.966394	0.9125	0.930009	0.907281	0.915452	0.944492	0.896962	0.912735	0.929591	0.910367	0.945694	0.966391	0.970035	0.951042	0.953652	0.944449	0.932203	0.942411	0.9459	0.949414	0.968242	0.933786	0.969459	0.994545	0.983352	0.989318	0.986448	0.998201	0.997971	0.997124	1.02729	1.03299	1.09377	1.11646	1.20738	1.22517	1.27885	1.34167	1.38072	1.39361	1.40798	1.40728	1.43937
1.44675	1.48552	1.4924	1.43897	1.41389	1.43396	1.43052	1.45108	1.39206	1.4517	1.48593	1.45266	1.45035	1.43095	1.4267	1.42339	1.41116	1.43085	1.42018	1.40966	1.39339	1.33563	1.34036	1.3068	1.34202	1.33518	1.31217	1.27949	1.26683	1.24186	1.21785	1.26516	1.21353	1.20681	1.19243	1.24102	1.21745	1.30775	1.25724	1.21049	1.33556	1.33529	1.33502	1.47629	1.51035	1.48063	1.47837	1.53933	1.54561	1.56158
1.28418	1.2091	1.25594	1.25122	1.24654	1.22696	1.19175	1.20559	1.21976	1.1839	1.21797	1.20945	1.20746	1.20547	1.20348	1.23096	1.24298	1.24681	1.25066	1.25453	1.27555	1.29729	1.31978	1.33532	1.35123	1.29589	1.2449	1.26357	1.28281	1.30674	1.27539	1.29169	1.28334	1.2751	1.31994	1.36804	1.31382	1.3469	1.36449	1.40352	1.52901	1.59964	1.6942	1.81398	1.86622	1.89948	2.02116	2.01883	2.04121	2.0683
1.0434	1.05911	1.02189	1.02808	1.02066	1.00447	1.01249	1.05972	1.08242	1.04969	1.03925	1.03654	1.03907	1.01952	1.00317	0.973695	0.992675	0.971051	0.972796	0.994531	0.979122	0.987348	0.998113	1.01894	1.02965	1.01852	1.01638	0.999626	0.98249	0.990259	1.01169	0.990592	0.991351	0.98883	0.986763	0.984705	0.978382	1.00251	1.00225	1.0342	1.09156	1.15566	1.21108	1.22074	1.22021	1.23594	1.21285	1.19314	1.19369	1.17142
1.26456	1.24686	1.22965	1.2129	1.1966	1.18074	1.16529	1.19246	1.22093	1.25079	1.28214	1.31511	1.34982	1.38786	1.42812	1.47077	1.51606	1.56422	1.61554	1.67034	1.72899	2.31402	1.9214	2.80256	2.06717	2.60639	3.49979	2.91895	3.10102	3.09376	3.11695	3.23425	2.73428	3.13555	2.94256	5.10562	1.93443	2.51479	2.10457	2.36385	1.84267	2.01203	2.04623	2.08162	1.91568	1.85499	1.79803	1.74446	1.69399	1.64636
1.22227	1.20279	1.14916	1.18857	1.16539	1.16354	1.14439	1.12655	1.13252	1.1339	1.0795	1.0814	1.10309	1.12159	1.05028	1.06281	1.02208	1.09384	1.09858	1.04178	1.08117	1.09381	1.0564	1.12384	1.13455	1.08376	1.09543	1.02525	1.06432	1.0378	1.05986	1.02598	1.04154	1.00372	0.986734	0.920682	0.920048	0.88347	0.877928	0.908897	0.977794	1.0427	1.14068	1.23405	1.23597	1.25139	1.26271	1.28608	1.2744	1.26294
0.96478	0.973932	0.931515	0.933727	0.947401	0.896759	0.966369	0.966081	0.971568	0.965704	0.957323	0.963058	0.962969	0.95457	0.990155	1.01733	0.996752	0.997881	1.00763	1.01859	1.02636	1.03425	1.04178	1.04969	1.0569	1.06421	1.05578	1.06147	1.06721	1.09878	1.10492	1.10052	1.14255	1.14444	1.14633	1.13295	1.12603	1.14052	1.16444	1.16015	1.19712	1.28703	1.36656	1.45657	1.55927	1.66032	1.74564	1.77295	1.79348	1.81449
1.10276	1.12612	1.05173	1.10382	0.979873	3.97239	9.546	9.29995	8.66273	8.10723	9.33016	9.32856	10.94	11.5588	9.56449	11.639	9.99526	9.25342	10.5992	8.52197	9.5409	5.28641	7.60229	5.96721	3.87194	4.96501	4.42681	3.95078	3.86312	5.04164	4.45536	4.42774	4.97325	4.86965	5.08067	9.70967	3.86583	4.98458	5.88066	5.94791	6.35238	6.1499	6.27662	8.02557	4.99913	5.38818	5.88468	5.46527	5.27401	5.09569
1.69829	1.86009	1.90223	0.896256	0.863015	0.965048	0.9763	0.988793	0.978086	0.972486	0.966949	0.965149	0.963355	1.04172	1.41215	1.76186	1.86544	1.94475	1.87592	1.82591	1.80854	1.65406	1.74825	1.62594	1.63931	1.60618	1.56799	1.54201	1.53277	1.51114	1.48841	1.53234	1.54771	1.56436	1.61171	1.73812	1.42948	1.45892	1.52936	1.61234	1.62785	1.66424	1.73093	1.74332	1.75016	1.78809	1.77403	1.85613	1.87626	1.89822
1.27324	1.2909	1.34726	1.36239	1.36893	1.39183	1.40974	1.37034	1.33308	1.39385	1.34628	1.32388	1.37665	1.38674	1.38961	1.40026	1.38364	1.34796	1.3849	1.39252	1.40023	1.47843	1.44769	1.46822	1.47568	1.58147	1.58804	1.56738	1.57648	1.66504	1.63522	1.62889	1.71041	1.73615	1.79217	1.95767	1.9131	1.87052	1.91568	1.98075	1.97739	2.00222	1.99065	1.97922	2.06605	2.09498	2.07526	2.05591	2.12689	2.09887
0.896722	0.91964	0.890593	0.907928	0.892769	0.858321	0.895569	0.874261	0.878717	0.844932	0.839107	0.818877	0.817011	0.815154	0.831555	0.83702	0.842557	0.848168	0.856867	0.854556	0.852257	0.865751	0.868013	0.870286	0.870549	0.84761	0.911668	0.923573	0.916127	0.940971	0.943383	0.928229	0.913554	0.897431	0.885334	0.87356	0.90072	0.902081	0.935927	0.981137	1.03094	1.08606	1.03695	1.09027	1.1029	1.12709	1.15237	1.1788	1.20648	1.20224
1.617	1.54103	1.42207	1.34161	1.54431	1.53466	1.52335	1.43959	1.44697	1.38651	1.23609	1.39701	1.34601	1.3646	1.3157	1.29004	1.27323	1.29999	1.30184	1.33643	1.28702	1.30397	1.29731	1.29856	1.3849	1.4156	1.39991	1.55477	1.51235	1.50386	1.49786	1.49948	1.49287	1.49556	1.49394	1.56	1.4353	1.52051	1.52292	1.5193	1.59148	1.67086	1.62927	1.62947	1.61956	1.65093	1.66762	1.6669	1.67554	1.6466
1.62504	1.55993	1.56169	1.56743	1.51411	1.47039	1.49442	1.49089	1.47047	1.49765	1.53308	1.53949	1.5297	1.42744	1.50442	1.59018	1.55023	1.5736	1.59768	1.71419	1.84903	1.34453	1.05632	0.869857	0.847601	0.830407	0.823776	0.83212	0.817908	0.843625	0.871011	0.871297	0.877508	0.883808	0.879438	0.867283	0.882985	0.896572	0.885138	0.887678	0.878341	0.882553	0.880383	0.875905	0.89714	0.887927	0.8824	0.88247	0.855873	0.962419
1.01585	1.03552	1.03278	1.03157	1.02272	1.01403	1.04451	1.00802	1.03355	1.01921	1.0109	0.989395	0.922415	0.919207	0.911079	0.900359	0.922175	0.972982	1.00179	1.05122	1.03639	1.02859	0.965288	0.972567	0.969252	0.945652	0.945371	0.907072	0.925131	0.90878	0.892998	0.887065	0.889419	0.891786	0.894165	0.905831	0.927519	0.896098	0.952977	1.01757	1.09155	1.1513	1.14207	1.13298	1.12404	1.11524	1.09152	1.06091	1.06787	1.07493
	1.01248	1.04431	1.0396	1.00839	1.03172	1.01006	1.05445	1.1344	1.058	1.12087	1.13023	1.16934	1.20945	1.18087	1.17779	1.19919	1.26183	1.24784	1.2575	1.26731	1.25844	1.35276	1.41471	1.50265	1.49929	1.50445	1.50254	1.47487	1.51879	1.64665	1.66519	1.75775	1.69422	1.72634	1.98402	1.62954	1.75493	1.74241	1.80461	1.79895	1.78759	1.85972	1.82166	1.8419	1.86523	2.04	2.04972	2.01946	2.02177
	1.23141	1.19106	1.15327	1.15412	1.1413	1.19429	1.18779	1.20497	1.15226	1.15431	1.15431	1.13444	1.09663	1.17963	1.22062	1.22112	1.24227	1.19206	1.22543	1.20632	1.2202	1.20514	1.25327	1.30047	1.29582	1.29902	1.40259	1.45362	1.44827	1.50753	1.56639	1.58782	1.66274	1.73853	1.82155	1.45766	1.58087	1.58145	1.62494	1.63977	1.65488	1.69992	1.74749	1.78017	1.88486	1.86911	1.86342	1.87338	1.84578
	1.00972	1.03297	1.05731	1.08283	1.10842	1.09549	1.08286	1.09156	1.08035	1.06936	1.05686	1.06011	1.06612	1.09055	1.08125	1.09374	1.09459	1.14374	1.15237	1.15912	1.18764	1.22159	1.1968	1.16586	1.16281	1.13305	1.14202	1.14795	1.09148	1.12645	1.16373	1.16314	1.16091	1.11403	1.12166	1.12939	1.13724	1.19372	1.22214	1.27631	1.30593	1.43254	1.53965	1.56815	1.60851	1.61853	1.59255	1.69208	1.68272
	1.09605	1.07088	1.0901	1.09177	1.15922	1.22305	1.2823	1.38105	1.51658	1.5723	0.797786	0.74295	0.803852	0.809902	0.753178	0.70388	0.692453	0.774458	0.901688	0.912944	0.988846	0.972467	0.953882	1.0397	1.08503	1.10918	1.08303	1.02722	0.970745	0.965868	0.9742	0.982677	0.991176	0.99429	0.996012	0.945777	0.965345	0.935925	0.971046	1.00891	1.17581	1.22453	1.25439	1.28575	1.28996	1.29419	1.29845	1.29871	1.29115
		1.6928	1.79182	1.61413	1.68723	1.68621	1.5919	1.64969	1.62862	1.58623	1.59539	1.59138	1.60118	1.67755	1.67323	1.66337	1.65362	1.6124	1.54829	1.49271	1.47225	1.40264	1.42317	1.44431	1.38693	1.37718	1.38166	1.38618	1.42748	1.47132	1.49134	1.5119	1.53305	1.55479	1.61356	1.44681	1.49654	1.5498	1.607	1.66858	1.59008	1.62903	1.58247	1.53931	1.5405	1.54169	1.44071	1.42879	1.45973
		2.84365	2.87681	2.82763	3.02235	3.24588	2.19596	2.36702	2.56699	3.84333	2.344	1.68619	1.38733	1.17846	1.14886	1.19631	1.24784	1.03164	1.27346	3.0676	1.03563	1.37311	1.08862	5.05437	5.02157	4.18926	5.995	5.72847	5.48464	5.40575	4.28275	6.14485	5.78095	5.11659	4.25872	3.64721	5.80825	5.47012	5.00217	4.60797	4.27137	4.94342	5.86645	7.21332	7.16111	6.52024	6.44594	6.37332	6.78959
						1.20647	1.13426	1.07021	1.07234	1.03467	1.20257	1.32226	1.33686	1.40141	1.35093	1.30983	1.50218	1.4415	1.38553	1.41218	1.41663	1.63109	1.64727	1.66016	1.64136	1.85519	1.93325	2.01817	1.8886	1.86793	1.70961	1.63183	1.6355	1.66882	3.12771	1.29193	1.59976	1.53909	1.55712	1.57558	1.59449	1.61385	1.63369	1.65402	1.67487	1.69625	1.69218	1.61963	1.64119
																	0.773287	0.800887	0.830529	1.01458	1.03446	1.09291	1.25059	1.33071	1.36037	1.46252	1.42344	1.4422	1.39798	1.38052	1.35187	1.28017	1.23886	1.23935	1.20178	1.16314	1.1655	1.19916	1.19797	1.25334	1.30567	1.36257	1.40192	1.36423	1.39908	1.40231	1.38437	1.36215	1.38887
												1.02322	0.969679	1.12218	1.32388	1.41162	1.57021	1.59441	1.61938	1.52273	1.46552	1.42876	1.39185	1.35219	1.21885	1.27079	1.21655	1.22529	1.31812	1.28031	1.31267	1.29007	1.29889	1.36452	1.47092	1.32795	1.43297	1.4799	1.44696	1.53017	1.56563	1.72163	1.7335	1.70461	1.70204	1.71393	1.74119	1.76658	1.79272
												1.06948	0.937479	0.984235	1.10687	1.37019	1.50937	1.65896	1.69867	1.73535	1.69555	1.65754	1.63175	1.60675	1.59131	1.5165	1.54048	1.56523	1.52409	1.52516	1.48091	1.63275	1.61087	1.52159	2.20169	1.46194	1.75681	1.90061	1.92648	1.95977	1.92158	1.88281	1.89042	1.8927	1.92636	1.91979	1.95537	1.9923	2.03065
																	0.991775	0.989848	1.04483	1.08543	1.12931	1.15717	1.18644	1.21679	1.24873	1.28239	1.28001	1.31951	1.36152	1.31359	1.35536	1.40599	1.46054	1.52808	1.60217	1.2974	1.34354	1.39309	1.44643	1.52967	1.62296	1.68529	1.68546	1.82874	1.90968	1.75789	1.67424	1.78133	1.74839
																	0.901252	0.921934	0.930941	1.00768	1.18156	1.18583	1.26678	1.29644	1.29425	1.2037	1.1791	1.15669	1.1572	1.16468	1.17226	1.1713	1.16228	1.15158	1.17336	1.14301	1.17034	1.19639	1.23057	1.27628	1.33044	1.35502	1.41753	1.41373	1.38697	1.43594	1.43029	1.41718	1.4043
																																													1.10676	1.09055	1.0748	1.11592	1.1603
																						1.17027	1.15452	1.25332	1.43801	1.43588	1.52937	1.43938	1.43268	1.49202	1.46253	1.47562	1.75701	1.82099	4.92011	1.50686	1.88023	1.96663	1.72272	1.94925	2.04826	1.96712	1.97751	1.81627	1.8098	1.82104	1.73641	1.89753	1.91722
																													1.06645	1.09096	1.07186	1.18432	1.27603	1.30434	1.28789	1.20708	1.20364	1.26479	1.25257	1.25742	1.22895	1.24639	1.29335	1.35665	1.42464	1.43895	1.49369	1.56843	1.54862
																																									1.75926	1.74592	1.73278	1.82861	1.79639	1.83923	1.88417	1.93137	1.83811


																																				1.11339	1.12888	1.14481	1.16119	1.17804	1.1954	1.21327	1.23168	1.25067	1.25796	1.24424	1.27108	1.24811	1.22595
																																					1.10628	1.23201	1.35364	1.70837	1.88517	2.0029	1.84579	1.81649	1.71606	1.70427	1.70772	1.71118	1.71465
																																						0.991458	1.07839	1.22046	1.50161	1.82389	1.99522	2.17625	2.14351	2.162	2.24695	2.28217	2.16466
																																																1.30563	1.18897
1.4727	1.50726	1.5406	1.48544	1.57374	1.61264	1.57973	1.57061	1.62549	1.62609	1.61626	1.61993	1.598	1.57353	1.56482	1.55508	1.58913	1.52895	1.52561	1.52628	1.49314	1.4497	1.48305	1.48037	1.47684	1.49773	1.4891	1.5619	1.54563	1.53997	1.52007	1.4591	1.42079	1.39345	1.34984	1.46747	1.29339	1.41818	1.47668	1.49819	1.56619	1.6557	1.6719	1.72581	1.75954	1.81448	1.80374	1.7885	1.8237	1.85026
1.07673	1.06495	1.03561	1.03605	1.03673	1.04519	1.00782	1.04764	1.08752	1.07189	1.06052	1.08318	1.048	1.05102	1.06481	1.05115	1.04403	1.03732	1.02391	1.00788	1.00706	0.985182	1.00373	0.974413	0.990536	0.967002	0.961174	0.951935	0.923195	0.949442	0.957411	0.96874	1.01158	1.03692	1.0016	0.983545	1.00295	1.00644	0.979364	1.02332	1.0793	1.16539	1.26545	1.32946	1.30621	1.40196	1.47022	1.44593	1.45558	1.4167
1.3693	1.3588	1.39027	1.4084	1.40678	1.37909	1.44221	1.38892	1.41498	1.41269	1.41561	1.43278	1.38811	1.3897	1.35626	1.4126	1.42395	1.52872	1.48102	1.44985	1.47194	1.57679	1.48627	1.41599	1.55068	1.67986	1.58854	1.71836	1.80567	1.84087	1.81324	1.87525	1.86085	1.86012	1.86622	2.13983	1.48487	1.49489	1.35684	1.42698	1.35754	1.35624	1.3675	1.32488	1.31726	1.526	1.67041	1.87245	1.69531	1.65236
1.17495	1.15765	1.14441	1.1868	1.20084	1.17162	1.11895	1.14015	1.1243	1.10204	1.13168	1.1201	1.11789	1.12557	1.15398	1.16429	1.15373	1.2084	1.18865	1.18702	1.19709	1.20476	1.21906	1.19162	1.18445	1.21922	1.2333	1.22976	1.31052	1.24872	1.27653	1.2675	1.29072	1.3245	1.29458	1.38463	1.25834	1.31877	1.27974	1.31889	1.32504	1.33671	1.34201	1.40251	1.4343	1.49484	1.53822	1.54206	1.54718	1.56685
1.24659	1.28396	1.26379	1.2723	1.30432	1.33304	1.32934	1.32995	1.38198	1.36816	1.39079	1.39728	1.4195	1.44938	1.42248	1.41563	1.41743	1.45162	1.44269	1.45749	1.42424	1.3986	1.41325	1.41839	1.39351	1.41416	1.45304	1.4177	1.43478	1.4096	1.37156	1.4283	1.45546	1.45682	1.46527	1.74412	1.31941	1.45422	1.45468	1.50687	1.57771	1.6007	1.64831	1.63354	1.67738	1.72364	1.71955	1.73933	1.75464	1.75277
1.17718	1.21012	1.19847	1.23884	1.29014	1.30185	1.30412	1.30278	1.31043	1.31692	1.27992	1.30629	1.30781	1.2845	1.26628	1.29225	1.31036	1.29668	1.35943	1.37188	1.36286	1.37155	1.36836	1.357	1.39005	1.41418	1.47243	1.43525	1.44595	1.46632	1.51611	1.49647	1.46658	1.46433	1.47616	1.5393	1.48845	1.52946	1.51633	1.59104	1.64494	1.70181	1.78277	1.85749	1.79736	1.88479	2.0155	1.98077	1.90421	1.99051
1.23289	1.22891	1.18026	1.17387	1.16206	1.1734	1.16029	1.15122	1.15938	1.11656	1.14218	1.14485	1.10539	1.13403	1.14127	1.16026	1.13696	1.18851	1.18725	1.20374	1.23717	1.16701	1.20817	1.22984	1.21699	1.28339	1.3202	1.2921	1.30748	1.2811	1.31016	1.31201	1.24591	1.22631	1.22842	1.4122	1.16644	1.2581	1.19251	1.27162	1.28834	1.31658	1.37792	1.39218	1.53659	0.737011	0.742132	0.831353	0.681218	0.577015
1.28449	1.2697	1.24002	1.20376	1.18697	1.16767	1.14713	1.13111	1.12918	1.12017	1.12958	1.13781	1.13426	1.13588	1.1398	1.14897	1.15136	1.12617	1.13553	1.122	1.14925	1.12458	1.1016	1.07538	1.05736	1.02094	1.01795	1.02051	1.00239	1.03834	1.03253	1.05023	1.08554	1.09007	1.08996	1.11751	1.08709	1.08683	1.05665	1.06589	1.11093	1.18311	1.24548	1.31315	1.35813	1.42849	1.51886	1.5054	1.54606	1.53173
2.14742	3.08178	5.03688	1.32513	1.38146	2.67596	1.43369	1.36265	2.89459	1.43309	1.36143	1.35845	1.29774	1.37524	1.36956	1.39222	1.42852	1.52132	1.39852	1.42727	1.48674	1.42002	1.39015	1.40632	2.2478	2.69584	2.72114	2.57236	3.37142	2.63604	3.21994	3.05011	2.85211	1.20738	1.81004	1.29549	1.59031	1.08556	2.89898	1.2089	1.29565	1.34012	2.03878	2.11229	1.5088	1.43324	1.81098	2.26964	1.76024	2.06283
1.29105	1.29657	1.2786	1.24743	1.20509	1.20863	1.21441	1.27418	1.2871	1.34257	1.34319	1.3056	1.36071	1.34103	1.42228	1.35686	1.34964	1.41078	1.48961	1.54844	1.59682	1.6265	1.6132	1.61884	1.61064	1.58772	1.62793	1.56632	1.5779	1.55374	1.5804	1.57514	1.55407	1.6055	1.53469	1.56637	1.4416	1.42435	1.21197	1.21212	1.30641	1.35925	1.37379	1.41433	1.51601	1.60538	1.55651	1.66869	1.65243	1.63649
1.13662	1.11653	1.12004	1.11497	1.10953	1.08728	1.08724	1.09767	1.09801	1.10934	1.12541	1.13782	1.15095	1.17217	1.15986	1.17024	1.18981	1.17282	1.20094	1.20274	1.20066	1.18703	1.19925	1.19925	1.2048	1.22683	1.24848	1.24258	1.25629	1.24684	1.25979	1.25178	1.28646	1.26644	1.28663	1.39664	1.25255	1.32589	1.33275	1.32808	1.3477	1.3549	1.39188	1.37811	1.38628	1.42151	1.49528	1.5346	1.65975	0.792623
1.11767	1.09196	1.09512	1.05924	1.02414	1.02707	1.03621	1.03926	1.0147	1.03504	1.03796	1.00621	0.979288	0.985911	0.985888	0.973917	0.986243	0.956163	0.951093	0.950075	0.948615	0.941826	0.920479	0.91975	0.895035	0.916714	0.920178	0.926445	0.949968	0.952847	0.971448	0.972594	0.953741	0.958884	0.949307	0.932085	0.971755	0.947856	0.903544	0.945685	1.00978	1.14155	1.22604	1.31989	1.35994	1.40248	1.38303	1.3633	1.35011	1.2964
1.29096	1.25961	1.25353	1.26077	1.24813	1.25017	1.27391	1.27062	1.26169	1.27042	1.26442	1.25774	1.2196	1.24412	1.24027	1.2289	1.25494	1.22458	1.24346	1.24517	1.24002	1.24246	1.23201	1.22176	1.22231	1.20301	1.232	1.21521	1.22965	1.1824	1.18663	1.20674	1.16153	1.17198	1.15811	1.16188	1.12701	1.13548	1.14851	1.16184	1.20833	1.25192	1.31142	1.34869	1.45993	1.49548	1.60244	1.52824	1.5243	1.56218
1.19973	1.19124	1.1996	1.17388	1.17647	1.16721	1.17267	1.14496	1.16276	1.17731	1.14	1.14564	1.16002	1.16108	1.16849	1.17745	1.15631	1.12515	1.11579	1.10625	1.16182	1.15871	1.21272	1.22212	1.25366	1.26652	1.30179	1.27081	1.29659	1.26869	1.32106	1.33115	1.30442	1.3177	1.2821	1.57072	1.21942	1.30476	1.34857	1.3224	1.34866	1.35866	1.33068	1.33607	1.35841	1.38151	1.39482	1.36174	1.38844	1.38933
1.3968	1.36698	1.32543	1.30982	1.30944	1.28995	1.2969	1.27295	1.29266	1.27999	1.25991	1.32849	1.34125	1.33006	1.35199	1.374	1.31859	1.33634	1.30406	1.35279	1.35416	1.32904	1.35445	1.43988	1.42052	1.40194	1.43724	1.40415	1.45181	1.49402	1.50086	1.48477	1.51563	1.50867	1.5429	1.79172	1.45336	1.58671	1.5938	1.53052	1.60591	1.59708	1.65126	1.70509	1.65317	1.69772	1.75116	1.74462	1.78536	1.68584
1.20514	1.20878	1.21891	1.25738	1.28494	1.26923	1.29467	1.31444	1.32875	1.29645	1.31079	1.3369	1.32628	1.3339	1.33758	1.34628	1.3413	1.35813	1.38408	1.36978	1.36794	1.40188	1.3917	1.44768	1.44244	1.44936	1.4635	1.46624	1.47075	1.44092	1.4183	1.40324	1.39367	1.36288	1.38156	1.45774	1.37994	1.40962	1.38093	1.38698	1.43012	1.43279	1.51843	1.54561	1.58876	1.63424	1.67272	1.68356	1.6368	1.57552
0.806479	0.800309	0.786493	0.772908	0.765161	0.740599	0.717711	0.728352	0.708456	0.716255	0.703734	0.693314	0.680358	0.674179	0.668254	0.664387	0.667341	0.655274	0.65558	0.646913	0.637774	0.639712	0.634284	0.645492	0.630792	0.626538	0.625647	0.618521	0.627142	0.620378	0.643506	0.617119	0.615394	0.614776	0.618111	0.595127	0.653795	0.616662	0.626035	0.646037	0.711034	0.786557	0.850429	0.882398	0.872339	0.858544	0.831	0.805168	0.78155	0.79017
1.08723	1.09656	1.08796	1.08186	1.09495	1.09238	1.09034	1.11149	1.12171	1.12707	1.12039	1.08838	1.1249	1.12332	1.1429	1.13528	1.15726	1.15276	1.19687	1.19911	1.19895	1.21022	1.21156	1.22982	1.25149	1.30499	1.3284	1.35816	1.41872	1.44909	1.4784	1.49477	1.51914	1.50824	1.52544	1.6437	1.43457	1.50266	1.51909	1.51922	1.54173	1.55432	1.59211	1.62928	1.64973	1.65969	1.78535	1.75981	1.75429	1.719
0.8513	0.838535	0.835962	0.817225	0.82476	0.837437	0.839634	0.847449	0.882686	0.901848	0.919528	0.939536	0.953846	0.987459	1.01369	1.08909	1.04898	1.0616	1.06829	1.11032	1.08585	1.0595	1.06809	1.0766	1.09977	1.11092	1.13842	1.12531	1.16652	1.14014	1.15605	1.12108	1.13936	1.12048	1.11758	1.11161	1.09923	1.06594	1.02592	1.04601	1.12833	1.17874	1.30107	1.32086	1.42875	1.43051	1.47132	1.47936	1.4371	1.45161
1.18501	1.23709	1.20378	1.20108	1.28525	1.32294	1.14262	1.22209	1.15192	1.20773	1.15083	1.21235	1.21088	1.20342	1.15068	1.16896	1.17812	1.17034	1.17561	1.18595	1.18958	1.12269	1.12999	1.0989	1.04432	1.10645	1.10679	1.11693	1.07086	1.07637	1.06213	1.05882	1.06223	1.02975	1.05094	1.0683	1.05165	1.09833	1.05913	1.14209	1.22231	1.27914	1.31912	1.36532	1.42061	1.46282	1.60757	1.66637	1.67181	1.66305
1.24294	1.2121	1.21696	1.23047	1.21278	1.2159	1.22136	1.27002	1.25368	1.2694	1.23461	1.27105	1.26104	1.28909	1.27975	1.25443	1.24913	1.22181	1.20194	1.26812	1.27477	1.23997	1.23124	1.32432	1.28611	1.29313	1.29994	1.28252	1.2559	1.28322	1.31689	1.33317	1.25595	1.29153	1.32927	1.66054	1.34223	1.58801	1.39327	1.3416	1.32617	1.38359	1.4462	2.0907	1.41862	1.82387	1.66752	1.53586	2.13913	2.33059
1.25405	1.24305	1.24586	1.25829	1.26316	1.27616	1.29594	1.27817	1.30566	1.31017	1.31873	1.36805	1.36809	1.3554	1.36781	1.39333	1.3995	1.41608	1.43644	1.42141	1.42941	1.43531	1.40736	1.50564	1.46841	1.50313	1.52726	1.51366	1.45604	1.50728	1.52695	1.49312	1.53019	1.5394	1.55569	1.7176	1.38326	1.54815	1.61327	1.57773	1.58426	1.64747	1.69637	1.77715	1.78366	1.86428	1.96403	2.00351	1.94511	1.95549
0.677543	0.635681	0.612232	0.686105	0.967208	0.930471	0.967077	0.995535	1.03786	1.05942	1.06458	1.09375	1.14108	1.12416	1.15619	1.2304	1.23281	1.23162	1.23969	1.23836	1.25026	1.24816	1.23178	1.22664	1.21986	1.22391	1.22856	1.24813	1.22836	1.24371	1.24996	1.24773	1.25838	1.23704	1.25976	1.25526	1.25089	1.23476	1.23885	1.25785	1.34747	1.41071	1.41942	1.44269	1.41491	1.38061	1.38485	1.38143	1.38991	1.3861
0.945202	0.945704	0.968676	0.971149	0.980907	1.00669	1.0161	0.995928	1.03025	1.019	1.04664	1.05439	1.04024	1.0605	1.02937	1.06117	1.08445	1.08653	1.11007	1.07637	1.11437	1.12763	1.14324	1.19434	1.20769	1.24905	1.20161	1.22108	1.26869	1.23806	1.19573	1.22127	1.24465	1.24986	1.24353	1.29526	1.25958	1.28659	1.24481	1.26308	1.30155	1.404	1.45876	1.50211	1.53346	1.60337	1.66369	1.63208	1.63255	1.68197
1.12847	1.13721	1.15417	1.13381	1.15454	1.15572	1.13435	1.14137	1.13205	1.14695	1.16572	1.18477	1.23094	1.24458	1.26506	1.31935	1.32038	1.31634	1.3175	1.29359	1.27046	1.29617	1.32305	1.33377	1.375	1.33809	1.29524	1.29073	1.30595	1.3401	1.30275	1.33177	1.30724	1.31258	1.31631	1.3712	1.24491	1.31327	1.23213	1.26582	1.31297	1.37513	1.4217	1.44244	1.52835	1.64076	1.6861	1.71852	1.68696	1.72244
1.65401	1.66551	1.62462	1.63379	1.61785	1.65811	1.5917	1.64887	1.62858	1.68121	1.67191	1.73737	1.69031	1.77682	1.73568	1.75821	1.76726	1.75199	1.78064	1.8313	1.77442	1.8026	1.79731	1.78183	1.85075	1.8058	1.86142	1.89842	1.89277	1.85234	1.88033	1.86213	1.79893	1.78646	1.79707	2.5962	1.42723	1.72252	1.7418	1.70902	1.67744	1.7307	1.69641	1.73764	1.76568	1.78345	1.71137	1.69472	1.75955	1.79679
1.22052	1.20934	1.20512	1.18431	1.21081	1.20081	1.22776	1.25633	1.25645	1.28834	1.30277	1.34446	1.35648	1.38771	1.38036	1.36059	1.37107	1.41324	1.40634	1.43701	1.41322	1.42375	1.41439	1.41891	1.39546	1.43971	1.46026	1.45512	1.48592	1.51194	1.52134	1.56599	1.58426	1.5759	1.5969	1.81421	1.63645	1.75955	1.72188	1.68579	1.71766	1.77375	1.77267	1.78913	1.81117	1.88909	1.86741	1.86306	1.90123	1.90836
1.64433	2.11218	2.35259	2.07821	1.98304	1.76757	1.81686	1.14573	4.2658	1.15553	1.20392	1.12958	1.11757	1.18499	1.18594	1.19206	1.17077	1.19576	2.96995	1.27954	2.80937	1.22463	1.63807	1.97433	1.28478	1.26547	3.1786	1.24233	2.82863	1.615	2.285	2.04215	1.32671	3.51545	1.88668	4.72676	2.36284	3.36418	2.97156	2.78934	2.69395	2.60486	2.66905	2.21596	2.3947	2.539	2.24133	2.00613	1.77396	2.02644
1.24903	1.34536	1.49217	1.53053	1.60381	1.52684	1.7062	1.60972	1.61769	1.5336	1.46999	1.47795	1.37396	1.33333	1.29584	1.30476	1.33018	1.31292	1.29785	1.33915	1.25821	1.30189	1.34223	1.37145	1.33895	1.32044	1.36171	1.35653	1.34585	1.34439	1.33878	1.32062	1.35325	1.30072	1.32368	1.34416	1.2628	1.3094	1.35958	1.37837	1.42735	1.44551	1.51098	1.54554	1.5868	1.71254	1.8035	1.87063	1.87274	1.88658
1.74969	2.27137	2.00446	2.16327	1.37356	1.54427	2.31161	1.99276	1.75121	2.37702	2.43908	2.14683	1.80852	1.81842	1.85731	2.26239	1.92172	2.01146	1.79768	1.7932	1.73407	2.05254	2.06233	1.69392	1.62563	1.70307	1.8958	1.81581	2.047	1.39916	1.873	1.36471	1.39932	1.465	1.42526	6.36957	1.51435	1.77105	2.12337	2.04416	2.06968	2.34897	2.34756	2.37348	2.25679	2.2575	2.15336	2.13523	2.24131	2.35848
0.563994	0.434084	0.454314	0.55334	0.549253	0.488232	0.639825	0.580431	0.482506	0.506727	0.409073	0.426203	0.394309	0.405881	0.418099	0.487387	0.425463	0.448496	0.452311	0.419099	0.450134	0.46441	0.437542	0.460743	0.434644	0.411343	0.482802	0.481945	0.482036	0.456798	0.436748	0.421841	0.431153	0.418506	0.435341	0.337094	0.375307	0.423293	0.412731	0.388751	0.431052	0.427355	0.442431	0.40926	0.42521	0.430953	0.42808	0.444649	0.446831	0.448316
1.43498	1.45709	1.43141	1.41817	1.42933	1.45234	1.43441	1.44243	1.46921	1.48773	1.48526	1.49713	1.47747	1.49989	1.49217	1.50812	1.48027	1.4955	1.47769	1.47819	1.4861	1.48539	1.47496	1.50236	1.50621	1.52901	1.51684	1.54245	1.51653	1.54121	1.54711	1.57096	1.55802	1.5555	1.58247	1.93522	1.34437	1.49332	1.46256	1.43752	1.47084	1.47875	1.46953	1.46048	1.47197	1.51523	1.51549	1.48064	1.45203	1.45723
1.36622	1.33462	1.33249	1.30763	1.27099	1.27214	1.28041	1.28726	1.28136	1.28181	1.30123	1.33028	1.34059	1.36833	1.38968	1.41181	1.3876	1.42081	1.47064	1.49146	1.47771	1.49486	1.53411	1.54381	1.5594	1.5775	1.5874	1.60216	1.61721	1.65332	1.67025	1.7245	1.74151	1.75701	1.81512	1.99899	1.78934	1.87301	1.88934	1.89114	1.88732	1.92295	2.06255	2.06011	2.11217	2.16694	2.15728	2.14771	2.18908	2.13349
0.972987	0.988804	0.980979	0.944608	0.940154	0.936391	0.925234	0.905469	0.887806	0.892311	0.886247	0.872593	0.901167	0.868207	0.938489	0.928158	0.917271	0.935767	0.919255	0.914968	0.892245	0.874323	0.873108	0.887064	0.878162	0.927432	0.94611	0.965554	0.926393	0.966701	0.986753	0.947293	0.927867	0.911868	0.903781	0.807734	0.85949	0.86794	0.895679	0.922962	1.05624	1.09552	1.14728	1.19925	1.19347	1.19172	1.20749	1.22367	1.19723	1.24429
1.2245	1.24789	1.21919	1.22251	1.21325	1.22223	1.21835	1.20796	1.22001	1.224	1.23058	1.25287	1.26412	1.27516	1.26275	1.3	1.26	1.29072	1.28337	1.23778	1.25776	1.26416	1.2506	1.27406	1.25701	1.24481	1.25986	1.26573	1.28704	1.29869	1.3098	1.32695	1.38578	1.43291	1.45846	1.53291	1.32016	1.38689	1.34644	1.33612	1.39592	1.45964	1.47335	1.5493	1.60127	1.62991	1.6694	1.66564	1.69096	1.66528
1.46158	1.44813	1.43351	1.44767	1.421	1.43077	1.43652	1.41708	1.4364	1.46931	1.45723	1.50515	1.54121	1.56091	1.58956	1.62566	1.61584	1.63569	1.63079	1.65141	1.63854	1.62445	1.63999	1.59589	1.57512	1.56768	1.57267	1.56323	1.58889	1.55947	1.50284	1.52509	1.50661	1.49215	1.46218	1.57833	1.35764	1.45027	1.3739	1.44724	1.50865	1.55179	1.59746	1.60073	1.64084	1.70651	1.84499	1.83213	1.73256	1.78133
1.17328	1.17268	1.16954	1.19317	1.19431	1.20556	1.21238	1.27483	1.23758	1.21419	1.21174	1.24639	1.23062	1.34047	1.28614	1.29135	1.3092	1.27793	1.30719	1.28854	1.27366	1.29159	1.3535	1.43291	1.36145	1.38824	1.44082	1.41807	1.45252	1.4517	1.46636	1.43633	1.43188	1.40639	1.43894	1.64546	1.31846	1.53824	1.59181	1.56995	1.72703	1.73094	1.79361	1.65716	1.64539	1.53259	1.50068	1.6596	1.64409	1.65318
1.14258	1.15573	1.1673	1.13395	1.14992	1.14657	1.16443	1.16291	1.16947	1.16124	1.15373	1.16881	1.16525	1.1676	1.16146	1.17166	1.13375	1.12258	1.11618	1.11128	1.10641	1.08045	1.09437	1.09827	1.07565	1.07377	1.05596	1.05638	1.07827	1.09246	1.114	1.12659	1.13946	1.16076	1.11874	1.11932	1.1199	1.1323	1.11756	1.21647	1.34199	1.41255	1.48757	1.58183	1.67358	1.69873	1.79291	1.81299	1.80923	1.83719
1.36437	1.37364	1.39733	1.41131	1.42634	1.44244	1.40424	1.42818	1.44257	1.4831	1.50146	1.52728	1.48206	1.53461	1.5075	1.49846	1.53159	1.51905	1.52573	1.50564	1.53086	1.49773	1.50808	1.53061	1.521	1.51323	1.51768	1.5133	1.52605	1.48823	1.52246	1.53021	1.48877	1.53718	1.54542	1.83358	1.46949	1.63339	1.5468	1.60913	1.76891	1.79469	1.78713	1.84814	1.83598	1.82093	1.96219	1.86904	1.93156	1.89985
1.3324	1.3266	1.32563	1.32034	1.27589	1.2943	1.26963	1.27933	1.29733	1.30102	1.35145	1.34822	1.36522	1.36335	1.36041	1.39017	1.38629	1.43032	1.39607	1.46441	1.43497	1.44273	1.40888	1.43505	1.42009	1.39173	1.41616	1.46319	1.51344	1.49675	1.55721	1.55844	1.58154	1.57045	1.58421	1.6842	1.51915	1.63888	1.60105	1.66744	1.73174	1.79813	1.80314	1.87366	1.92678	1.92741	1.98081	1.9911	2.0433	2.10108
0.726728	0.719685	0.698274	0.70053	0.684376	0.705048	0.703053	0.704797	0.661817	0.687138	0.687014	0.66595	0.677276	0.679681	0.685249	0.705966	0.692934	0.691142	0.695397	0.698817	0.70227	0.699605	0.70528	0.70774	0.687175	0.701059	0.717089	0.696602	0.705868	0.686648	0.706677	0.709814	0.711057	0.728493	0.719716	0.738244	0.759626	0.751635	0.737348	0.767815	0.851751	0.961767	1.04414	1.14076	1.16871	1.25828	1.34472	1.38643	1.41185	1.41907
1.41281	1.47224	1.42944	1.40989	1.45561	1.5044	1.52423	1.51192	1.71944	1.64836	1.65899	1.56651	1.49296	1.55882	1.63805	1.63396	1.63883	1.90302	1.55967	1.64613	1.56147	1.54532	1.49137	1.44105	1.48787	1.42277	1.43289	1.34	1.36918	1.42488	1.3367	1.39085	1.46996	1.52507	1.53418	1.62663	1.28715	1.30378	1.44386	1.55209	1.77773	1.71543	1.82906	1.95881	2.02498	1.95362	1.93962	2.07393	2.01887	2.07302
1.16242	1.17479	1.16091	1.17082	1.14525	1.14568	1.14398	1.16716	1.18794	1.15488	1.16249	1.17839	1.19312	1.19823	1.19477	1.20798	1.22296	1.22725	1.22857	1.23232	1.19285	1.17199	1.15115	1.11864	1.11438	1.10917	1.12282	1.1365	1.13627	1.13151	1.14764	1.14036	1.13781	1.14781	1.13147	1.13357	1.13702	1.14292	1.18925	1.19582	1.29067	1.32727	1.40628	1.47479	1.54133	1.52409	1.51723	1.53166	1.48878	1.52838
1.12699	1.09013	1.09359	1.12892	1.1078	1.10415	1.12292	1.10981	1.11826	1.14163	1.12791	1.12096	1.11909	1.12838	1.12278	1.08979	1.09551	1.07398	1.09477	1.11275	1.11252	1.11655	1.1176	1.08015	1.08266	1.06356	1.08102	1.06741	1.05147	1.05003	1.04753	1.02465	1.04151	1.02353	1.05314	1.04696	1.04706	1.04801	1.00769	1.05597	1.11858	1.17799	1.20614	1.23746	1.27046	1.3449	1.34229	1.37163	1.36112	1.36534
1.09137	1.11371	1.10789	1.11534	1.10582	1.1274	1.13808	1.15105	1.14683	1.13338	1.12203	1.10427	1.0915	1.07086	1.09855	1.08458	1.06749	1.05111	1.03524	1.02804	1.02286	1.02573	1.02408	1.01808	1.01216	1.03165	1.02825	1.02593	1.03546	1.03651	1.04322	1.0325	1.04241	1.03372	1.04788	1.05264	1.05241	1.06347	1.07477	1.09897	1.16364	1.27449	1.35371	1.40811	1.41195	1.45024	1.44718	1.4201	1.41571	1.43049
1.42778	1.38163	1.41879	1.35407	1.39654	1.4106	1.40835	1.43876	1.38375	1.40675	1.44025	1.43663	1.42972	1.43195	1.46103	1.42958	1.46332	1.47302	1.48286	1.49415	1.50562	1.54323	1.55762	1.55211	1.59684	1.59239	1.59443	1.57287	1.59126	1.61756	1.5979	1.60568	1.61351	1.60628	1.61672	1.71971	1.54363	1.62158	1.63053	1.71546	1.85464	1.94821	1.90172	1.95236	1.98683	2.0353	2.09258	2.11898	2.08423	2.0506
1.54301	1.54268	1.55359	1.56465	1.64396	1.62349	1.57931	1.57592	1.57255	1.57652	1.58052	1.59251	1.60306	1.5954	1.59333	1.59127	1.61165	1.58797	1.54777	1.58863	1.57279	1.59735	1.57497	1.55574	1.57767	1.59754	1.58365	1.54031	1.49928	1.47535	1.41597	1.43258	1.46714	1.5034	1.50806	1.6764	1.51773	1.62926	1.5843	1.6053	1.60857	1.68855	1.7769	1.76733	1.76132	1.83351	1.86798	1.84732	1.83574	1.86023
1.05412	1.05882	1.04862	1.06541	1.01419	1.0445	1.0651	1.03848	1.06326	1.05655	1.05394	1.05932	1.03274	1.06864	1.07393	1.09333	1.11824	1.10576	1.14796	1.08863	1.11685	1.07097	1.07397	1.04617	1.07344	1.09588	1.07258	1.09394	1.08313	1.10446	1.10353	1.08877	1.11055	1.10388	1.16015	1.15972	1.09153	1.11616	1.09306	1.12674	1.16572	1.18952	1.27686	1.3671	1.4197	1.44261	1.45813	1.42513	1.43781	1.47568
0.990902	0.980775	0.963704	0.966362	0.94175	0.938386	0.917874	0.910384	0.910357	0.863193	0.909082	0.886139	0.886049	0.9111	0.917334	0.902392	0.884275	0.89377	0.897984	0.876009	0.889901	0.87171	0.861411	0.859678	0.868198	0.826722	0.842132	0.830393	0.82156	0.834944	0.837687	0.851986	0.860908	0.840416	0.850292	0.860403	0.884274	0.903873	0.929558	0.916081	0.960974	1.01049	1.0022	1.01067	0.986183	1.01764	0.992416	0.993752	0.995091	1.01974
1.26401	1.25717	1.2504	1.2571	1.24284	1.22891	1.23892	1.23707	1.23817	1.2291	1.22015	1.22559	1.22357	1.25491	1.24229	1.20394	1.17936	1.19294	1.21948	1.21506	1.14845	1.17431	1.19493	1.18017	1.17983	1.19014	1.20765	1.20156	1.20943	1.19337	1.17337	1.17852	1.15665	1.15027	1.15043	1.13373	1.13062	1.14502	1.12424	1.13584	1.19952	1.24496	1.33573	1.42791	1.46932	1.52344	1.59659	1.64451	1.65491	1.68566
1.47654	1.4854	1.49793	1.49015	1.45864	1.52765	1.50024	1.49604	1.49099	1.51186	1.52134	1.45693	1.48663	1.50202	1.4731	1.48429	1.51708	1.49095	1.49777	1.50091	1.52618	1.50433	1.46932	1.46415	1.52733	1.46067	1.48389	1.55964	1.52552	1.51689	1.49864	1.42846	1.39983	1.41185	1.38807	1.5113	1.34517	1.46526	1.47822	1.53239	1.62237	1.83925	1.95633	2.03343	2.078	2.09462	2.15239	2.18197	2.16565	2.14957
0.960965	0.970321	0.950355	0.937515	0.950973	0.945481	0.904538	0.915355	0.883884	0.855527	0.83213	0.818987	0.826278	0.84103	0.83668	0.8413	0.820086	0.828044	0.824041	0.82158	0.793945	0.79655	0.869061	0.854264	0.862338	0.856802	0.83139	0.825477	0.814009	0.808246	0.809029	0.835409	0.856168	0.837376	0.825939	0.826118	0.85829	0.868614	0.826826	0.855762	0.875161	0.959641	0.968727	1.06255	1.10757	1.16282	1.2066	1.19046	1.16108	1.14106
0.953449	0.953444	0.942866	0.922786	0.941244	0.884295	0.909722	0.85031	0.840409	0.83119	0.810048	0.81214	0.811535	0.806184	0.806192	0.792409	0.79988	0.80047	0.804904	0.812737	0.811857	0.83809	0.852658	0.859045	0.852764	0.863342	0.876871	0.869547	0.851045	0.855233	0.85421	0.820222	0.84296	0.826644	0.819609	0.822796	0.847797	0.837781	0.838114	0.84225	0.87825	0.902874	0.927819	0.935765	0.947192	0.952181	0.979725	0.976862	0.974141	0.987772
1.30586	1.30596	1.29867	1.26325	1.25648	1.28662	1.28708	1.29857	1.32987	1.32784	1.2917	1.32322	1.32065	1.33045	1.34903	1.35515	1.37958	1.37397	1.39439	1.40714	1.40276	1.41579	1.42772	1.44158	1.44997	1.42887	1.48599	1.52377	1.59398	1.60756	1.64623	1.59773	1.57398	1.57444	1.50799	1.81289	1.42296	1.53563	1.54656	1.62231	1.65572	1.65438	1.7004	1.78734	1.72648	1.78063	1.83728	1.8859	1.84558	1.8683
1.73415	1.69702	1.79674	1.78165	1.77966	1.71973	1.74807	1.67796	1.64243	1.72868	1.68499	1.61781	1.73419	1.80651	1.76114	1.73435	1.73195	1.78412	1.70225	1.70853	1.65147	1.66055	1.69542	1.71823	1.74622	1.74389	1.75186	1.83801	1.69653	1.67519	1.68708	1.70068	1.72362	2.03881	1.76508	2.44826	1.6027	1.69045	1.58343	1.61079	1.63911	1.66938	1.64665	1.90773	1.79412	1.88473	1.74763	1.69317	1.66175	1.55635
0.963082	0.973572	0.986841	0.955866	0.957494	0.993816	0.976121	0.998658	0.978428	0.972827	0.953377	0.974992	0.97907	0.982222	0.990881	1.01524	1.00887	1.02885	1.03222	1.07308	1.05301	1.0664	1.08333	1.07719	1.07823	1.06569	1.08326	1.08628	1.06468	1.05435	1.02995	1.01218	1.03447	1.03754	1.02496	0.997519	0.981939	0.985077	0.963589	0.991257	1.01233	1.0568	1.15144	1.22716	1.25913	1.30697	1.35745	1.37362	1.33356	1.3543
1.20676	1.21424	1.23324	1.19193	1.18815	1.22061	1.20999	1.19461	1.19986	1.22008	1.22608	1.27325	1.29141	1.28188	1.27941	1.31934	1.26755	1.26185	1.2712	1.22919	1.26161	1.2528	1.24411	1.24499	1.24297	1.22749	1.2463	1.25185	1.2592	1.20891	1.23418	1.22289	1.19799	1.20596	1.24616	1.2738	1.17101	1.15891	1.11493	1.30739	1.26803	1.33611	1.40825	1.43376	1.36602	1.41651	1.41676	1.41701	1.41725	1.43076
1.1511	1.09104	1.01483	1.02046	0.999312	0.98765	0.934702	0.962568	0.921352	0.926208	0.938949	0.908354	0.934669	0.890656	0.911141	0.856385	0.873807	0.888204	0.849902	0.843729	0.828109	0.867377	0.795581	0.828338	0.812595	0.795389	0.791959	0.765662	0.75851	0.753299	0.723631	0.775023	0.746581	0.758813	0.773303	0.762528	0.771531	0.762619	0.763351	0.7649	0.817187	0.859234	0.928785	0.912383	0.910087	0.89394	0.885279	0.881321	0.870198	0.829173
1.50348	1.52788	1.51573	1.46757	1.49797	1.48764	1.50124	1.48636	1.48091	1.44244	1.47934	1.53389	1.50647	1.47035	1.52338	1.47503	1.47357	1.43635	1.47555	1.44605	1.41915	1.41794	1.37251	1.37541	1.37833	1.40484	1.37395	1.39482	1.38803	1.40474	1.39486	1.39765	1.4347	1.45306	1.45004	1.49661	1.38231	1.38453	1.28608	1.3661	1.48112	1.50875	1.53576	1.53784	1.50325	1.51659	1.55119	1.53646	1.5359	1.53431
1.03698	1.0639	1.05921	1.05126	1.02012	0.99925	1.0114	1.02691	0.979712	1.01373	1.02198	0.991524	1.01311	1.01434	0.999477	1.00197	0.990488	0.973778	1.00391	0.995562	0.996919	1.00476	1.00873	1.01273	1.02458	1.05769	1.06498	1.08128	1.10568	1.08177	1.07972	1.1061	1.10617	1.11537	1.13002	1.12693	1.10488	1.12872	1.13168	1.15104	1.21261	1.26754	1.33255	1.38309	1.42975	1.46939	1.46944	1.50347	1.52883	1.51408
1.05031	1.02885	1.05106	1.05118	1.07592	1.09416	1.11302	1.08247	1.12426	1.10127	1.10744	1.13903	1.1472	1.2334	1.24748	1.25327	1.27304	1.21325	1.25405	1.21106	1.13304	1.20619	1.16714	1.1	1.14356	1.13643	1.13903	1.11329	1.09058	1.11319	1.09481	1.07951	1.07931	1.10281	1.13108	1.19041	1.09729	1.19747	1.19807	1.2376	1.33513	1.47248	1.54874	1.56988	1.6503	1.7089	1.83067	1.88011	1.90141	1.87729
1.34704	1.29175	1.34206	1.32956	1.3225	1.3168	1.33047	1.34435	1.32115	1.30473	1.31038	1.31403	1.29887	1.32789	1.26549	1.28821	1.31073	1.2908	1.31363	1.31478	1.29273	1.30457	1.29449	1.27008	1.27051	1.28743	1.30643	1.31811	1.33	1.3327	1.35839	1.33285	1.36217	1.37421	1.40062	1.54177	1.34175	1.38041	1.36645	1.38147	1.4026	1.38691	1.3663	1.39006	1.38959	1.45177	1.45817	1.48687	1.52523	1.57575
1.43683	1.36811	1.43816	1.51298	1.48446	1.4491	1.45858	1.46621	1.46348	1.45264	1.46275	1.47938	1.49639	1.46856	1.5055	1.52523	1.52991	1.49452	1.53505	1.53971	1.52624	1.59066	1.52076	1.55164	1.56125	1.57447	1.52259	1.56331	1.58553	1.5702	1.57253	1.58364	1.57794	1.59118	1.54326	1.74697	1.55291	1.70051	1.65752	1.6826	1.70113	1.77899	1.75369	1.88636	1.91045	1.94308	1.89141	1.80437	1.73715	1.66605
3.31846	4.12507	3.77938	3.92084	4.05478	3.69887	3.68341	3.61946	3.5577	3.38438	3.25571	3.20633	3.40485	3.24833	3.10556	2.97482	2.61559	2.33376	2.10677	1.92001	2.06795	2.24059	2.44468	2.68968	2.70508	2.6226	2.66078	2.66209	2.68562	2.61037	1.79615	1.73673	1.75524	1.87799	1.88566	1.9966	1.77831	1.91395	1.85282	1.84249	1.83329	1.9003	1.97903	2.13079	2.16555	2.13856	2.1904	2.11876	2.20443	2.19573
1.57261	1.38012	1.70219	1.71521	1.96362	1.44458	1.49803	1.43687	1.53435	1.4316	1.3852	1.39539	1.24943	1.78242	1.27781	1.22459	1.22323	1.22436	1.15653	1.1688	1.21655	1.18556	1.25301	1.23941	1.24686	1.28027	1.32937	1.37973	1.04353	0.938286	2.50243	2.73451	2.74504	3.35649	3.93295	6.15788	5.06526	4.30194	5.67757	2.31482	1.45377	9.32747	2.86674	9.77926	9.70935	9.10069	7.68411	6.33598	5.3454	5.433
1.78185	1.75658	1.75287	1.7952	1.77547	1.73306	1.73108	1.7291	1.70507	1.68169	1.71527	1.71803	1.70015	1.68263	1.61724	1.65319	1.64108	1.59915	1.58895	1.57888	1.55835	1.53834	1.51884	1.53115	1.57126	1.61352	1.61315	1.5924	1.53906	1.52145	1.52904	1.5367	1.55168	1.51724	1.45151	1.44089	1.43044	1.42013	1.35592	1.41521	1.47991	1.55082	1.62886	1.71517	1.83246	1.89955	1.9439	1.96213	1.97635	1.83521
0.911826	0.915688	0.910428	0.91479	0.934669	0.899881	0.926955	0.902697	0.874291	0.886546	0.88022	0.873984	0.885421	0.864239	0.851435	0.863548	0.828799	0.793826	0.811898	0.815113	0.797362	0.780367	0.784392	0.797111	0.810248	0.786527	0.798418	0.780722	0.773614	0.804215	0.782686	0.793957	0.784786	0.772405	0.76041	0.783012	0.80092	0.787243	0.828094	0.799674	0.826465	0.855114	0.88582	0.918814	0.936356	0.966139	0.971549	0.980902	0.990436	0.999905
1.22281	1.16777	1.13014	1.13387	1.10861	1.08444	1.01665	1.01066	0.988786	0.981715	0.974745	0.89894	0.963904	0.938398	0.887104	0.905102	0.896344	0.891353	0.87713	0.877866	0.89661	0.884281	0.891519	0.906174	0.869772	0.866226	0.862708	0.859219	0.864188	0.869215	0.874301	0.854335	0.878822	0.87846	0.858146	0.879572	0.869879	0.885039	0.900738	0.923829	1.08937	1.10669	1.09656	1.07227	1.03373	1.13177	1.19995	1.22681	1.2549	1.28431
1.44305	1.46915	1.42002	1.4447	1.45459	1.47984	1.46738	1.45478	1.47516	1.4622	1.47599	1.48112	1.49146	1.48571	1.45027	1.48688	1.49553	1.50137	1.546	1.55879	1.53014	1.49703	1.50443	1.53852	1.56776	1.59163	1.55344	1.56694	1.52508	1.5175	1.49977	1.52148	1.57823	1.5259	1.51296	1.55848	1.39716	1.44219	1.45118	1.5396	1.6209	1.76536	1.84054	1.87855	1.97608	2.03222	1.97981	1.95379	1.92503	1.84664
1.2306	1.21706	1.20481	1.18926	1.16217	1.15563	1.16298	1.13048	1.09627	1.10212	1.11191	1.11561	1.12626	1.13773	1.10126	1.07843	1.075	1.04983	1.04445	1.02414	1.02233	1.02121	1.00286	1.00396	1.00745	0.994941	0.982323	0.987248	0.981875	0.995802	0.978569	0.987255	0.978728	0.965564	0.919329	0.943095	0.928642	0.950912	0.959107	0.986294	1.05816	1.11108	1.14057	1.13788	1.14531	1.18277	1.19792	1.20896	1.21504	1.19957
1.12022	1.10113	1.09428	1.12787	1.14613	1.11383	1.12141	1.15932	1.10898	1.14862	1.17151	1.149	1.15293	1.12002	1.11801	1.11305	1.09813	1.10876	1.09274	1.07718	1.08875	1.08693	1.08057	1.05256	1.02597	1.04844	1.02713	1.00807	1.03606	0.996399	0.99804	1.00293	1.00214	1.04067	1.08227	1.08384	1.08027	1.087	1.0905	1.12219	1.13089	1.17324	1.17205	1.18792	1.2655	1.33357	1.40187	1.34421	1.37443	1.355
1.20746	1.24723	1.21895	1.19829	1.23632	1.24337	1.2684	1.25811	1.23999	1.26547	1.28824	1.31751	1.32722	1.32425	1.33218	1.33704	1.34194	1.38654	1.33154	1.37672	1.39344	1.36647	1.3877	1.39846	1.34488	1.31907	1.28189	1.27466	1.3199	1.30015	1.30903	1.32328	1.28911	1.2807	1.27004	1.25182	1.19779	1.20084	1.08717	1.19109	1.24806	1.35697	1.39897	1.38881	1.36882	1.34262	1.35381	1.36025	1.3786	1.35542
1.05632	1.04354	1.04999	1.04722	1.06626	1.06323	1.09059	1.10163	1.10498	1.0937	1.10667	1.10064	1.09706	1.09352	1.10093	1.10846	1.12101	1.13222	1.13174	1.13901	1.13758	1.13267	1.15626	1.14407	1.15571	1.15982	1.14138	1.13932	1.14221	1.1335	1.1438	1.16397	1.16685	1.18413	1.20194	1.29726	1.25487	1.29267	1.28306	1.27331	1.33974	1.37328	1.40855	1.44567	1.4848	1.52611	1.56978	1.61603	1.66508	1.64541
1.57276	1.58293	1.6164	1.61029	1.62567	1.63245	1.64262	1.69376	1.71958	1.71677	1.71878	1.71699	1.72468	1.72116	1.773	1.74382	1.7208	1.70118	1.6875	1.69822	1.73168	1.71399	1.7204	1.72834	1.73867	1.74407	1.74203	1.77141	1.72967	1.75616	1.79969	1.78245	1.7786	1.76451	1.7721	1.86742	1.72282	1.69926	1.67632	1.68842	1.83029	1.92683	1.97643	2.02865	2.08371	2.06995	2.06721	2.05778	2.01331	1.97073
1.19706	1.18871	1.19393	1.21254	1.21074	1.22413	1.24314	1.24928	1.24349	1.27472	1.28551	1.29648	1.34219	1.33744	1.34838	1.34186	1.35551	1.39086	1.40013	1.4481	1.45395	1.4732	1.47695	1.52331	1.48808	1.52002	1.47243	1.49073	1.5823	1.56335	1.52803	1.54806	1.54562	1.56617	1.54466	1.9828	1.40742	1.52229	1.56478	1.5905	1.61409	1.64666	2.06639	1.73429	2.0193	2.14036	2.214	2.23503	2.25647	2.27832
1.5297	1.54732	1.58641	1.63771	1.59963	1.67389	1.62978	1.67689	1.69788	1.72542	1.74962	1.7688	1.72581	1.68529	1.68264	1.74776	1.69742	1.72924	1.76227	1.74117	1.78091	1.81089	1.80843	1.83882	1.85286	1.88759	1.82641	1.83901	1.85178	1.84324	1.84309	1.87687	1.88789	1.89905	1.87939	1.88091	1.88242	1.88394	1.8573	1.87444	1.88971	1.92496	2.00065	2.02178	2.04335	2.06539	2.07496	2.10666	2.11752	2.12849
	1.05979	1.07004	1.02701	1.09833	1.15085	1.07811	1.13465	1.12325	1.126	1.10295	1.10818	1.13674	2.55479	1.26633	1.26675	1.25188	1.26972	1.31817	1.98309	1.2747	1.82556	2.05026	2.39323	2.56942	2.42611	2.40096	2.03381	2.06424	1.74253	2.22668	2.19059	2.02892	2.19775	1.96159	2.28241	1.83932	2.06631	2.11959	2.24368	2.34914	2.46501	2.14652	2.01846	2.02226	1.92642	1.98966	1.88901	1.79806	1.71991
	1.59761	1.51306	1.47938	1.4313	1.40345	1.37666	1.35088	1.31285	1.28809	1.347	1.37893	1.34527	1.32263	1.34641	1.34867	1.3602	1.30023	1.31051	1.31937	1.29612	1.33525	1.33483	1.40211	1.38981	1.43981	1.42774	1.44209	1.44682	1.45158	1.45638	1.4584	1.43607	1.44999	1.46418	1.47865	1.43274	1.49781	1.41666	1.43109	1.36517	1.44399	1.48379	1.52584	1.57034	1.63626	1.80624	1.85073	1.89747	1.84962
		1.20895	1.23149	1.19844	1.20441	1.25517	1.24089	1.27633	1.26819	1.31951	1.31842	1.30873	1.29153	1.40468	1.35914	1.39138	1.38947	1.45996	1.37945	1.35427	1.4666	1.46149	1.60435	1.72981	1.76985	1.82469	1.85593	1.99055	2.04946	2.03078	2.01736	1.99096	2.01932	1.94826	2.09854	1.78981	1.7649	1.71609	1.72953	1.74235	1.81501	1.80176	1.85768	1.81674	1.87741	1.88555	1.85294	1.83217	1.78218
		1.16542	1.00162	0.994643	0.987763	1.02953	1.07498	1.14311	1.12482	1.1071	0.964644	0.970971	0.977381	0.987072	0.996957	0.975001	0.953991	1.03464	1.02144	0.926278	0.999029	0.951084	0.984987	1.00593	0.999504	0.993156	1.05591	1.05672	1.00953	0.981759	0.955471	0.991601	0.971694	0.962003	0.952503	0.972976	0.977832	0.943804	0.995604	1.05428	1.1203	1.19515	1.18681	1.27827	1.26911	1.31995	1.3531	1.34561	1.2977
				0.891096	0.98741	1.10953	1.20471	1.29293	1.35041	1.37183	1.41359	1.42026	1.4137	1.40465	1.35255	1.29847	1.25069	1.21608	1.1741	1.1376	1.13064	1.09434	1.10836	1.10129	1.09432	1.08744	1.08289	1.10132	1.05939	1.06942	1.07127	1.07634	1.11183	1.11958	1.14157	1.13384	1.1541	1.16798	1.22362	1.27732	1.34736	1.40719	1.43947	1.47137	1.50394	1.53119	1.56515	1.55876	1.51216
					1.23805	1.2663	1.27332	1.28042	1.23917	1.21217	1.20872	1.28862	1.30261	1.33357	1.3235	1.34594	1.36321	1.33646	1.38305	1.34464	1.34489	1.34452	1.32761	1.27782	1.26873	1.23432	1.25243	1.32573	1.28705	1.34375	1.1908	1.28855	1.25668	1.21898	1.25095	1.27101	1.20889	1.20434	1.21532	1.27074	1.2821	1.30046	1.34814	1.37285	1.37616	1.44612	1.43243	1.49064	1.49227
							1.51933	1.50932	1.52124	1.47254	1.48891	1.4339	1.46105	1.5066	1.45088	1.46487	1.51927	1.51483	1.44888	1.42539	1.45705	1.50142	1.43323	1.57916	1.59339	1.51709	1.54801	1.48964	1.45352	1.65261	1.69218	1.56236	1.58819	1.52733	1.82199	1.49997	1.68304	1.69734	2.12478	1.85225	1.7447	1.80007	1.94161	1.99007	2.13893	2.03775	1.97075	1.76489	1.81513
								1.54854	1.47051	1.48741	1.48697	1.49912	1.53435	1.50682	1.52891	1.47884	1.48416	1.48101	1.52893	1.5141	1.50769	1.52822	1.59421	1.58601	1.61705	1.64158	1.63793	1.69773	1.66926	1.69977	1.75242	1.98115	1.03262	0.975565	1.20687	1.05505	1.12929	1.01583	1.23708	1.21892	1.33438	1.51417	1.7132	1.74198	1.81379	1.78826	1.83021	1.85479	1.79671
																									1.54419	1.54097	1.53776	1.53457	1.53139	1.52822	1.56959	1.61326	1.73928	1.62255	1.58265	1.49864	1.42386	1.43514	1.4466	1.45755	1.49214	1.52841	1.42062	1.45636	1.28738	1.23438	1.16346	1.24677	1.25839
																																											2.23545	2.3573	2.33562	2.31434	2.33156	2.33282	2.27487
																																								1.19319	1.29563	1.39736	1.58063	1.8089	1.8756	1.86484	1.86184	1.8877	1.91428
																																										2.56481	2.43818	2.35883	1.89715	2.22863	2.11975	1.99617	1.62806
																																																0.927048	1.09619

[truncated: 167 more columns]

## Sheet: TFEB_3xSA_TR 1xgg 1xaa
TFEB_3xSA_TR; cells culture with 1xGluc/Glut 1xEAA, stimulated at time point 38; sampling time: 5 min; data are cells-by-time
Tx dose: 0ng INS
4.94048	4.44169	3.85722	4.33867	4.48917	4.11626	4.9723	5.64898	4.46657	4.89646	5.29093	4.88906	4.73613	4.71365	4.31188	4.32356	3.97202	3.63862	3.62664	3.65059	4.16278	4.0661	3.89254	2.64464	3.05053	3.90679	3.41502	2.50951	2.26661	3.13597	2.97828	2.96241	2.45512	3.00113	2.49366	3.21121	1.94616	2.47404	1.99725	1.85705	2.19815	1.86083	1.64579	1.95738	1.80539	1.80076	1.72873	1.69425	1.45993	1.39919
1.24141	1.20756	1.20425	1.20927	1.18423	1.17565	1.16437	1.14011	1.1466	1.13751	1.15867	1.16102	1.19452	1.19396	1.17254	1.16594	1.18136	1.1626	1.18072	1.17362	1.11451	1.11787	1.12789	1.15033	1.18024	1.14988	1.13299	1.0989	1.12777	1.15878	1.09584	1.0836	1.09707	1.09378	1.12957	1.12914	1.05379	1.07406	1.16035	1.08473	1.12709	1.07442	1.09487	1.12298	1.06996	1.1236	1.21833	1.19315	1.1708	1.20172
1.15189	1.15906	1.10181	1.10704	1.06762	1.00792	1.01188	1.05462	1.05279	1.03541	1.0542	1.021	1.05222	1.07403	1.07045	1.03752	1.05499	1.02116	1.01232	0.99802	0.986504	0.971674	0.99905	0.989081	1.00877	1.03985	1.04033	1.04946	1.03611	1.05628	1.03614	1.04285	1.04549	1.02085	0.99734	0.974509	1.00062	1.00733	1.01516	1.02312	1.01872	1.02081	1.0229	0.993824	0.951499	1.01422	0.977113	0.985879	0.959091	0.921381
1.60674	1.75775	2.01088	1.8215	2.05301	1.99681	1.85879	1.75613	2.06627	2.02869	2.2279	2.05843	2.16895	1.98036	1.77574	1.87356	1.84715	2.02192	1.86663	2.01427	1.97897	2.15735	1.975	2.09166	2.05444	2.04237	1.99041	1.93061	1.62853	1.66158	1.72333	1.58111	1.49492	1.52181	1.6078	1.77519	1.43701	1.62756	1.71251	1.88895	1.95569	1.86522	1.88686	2.00542	1.97944	1.98788	1.78878	1.97257	1.9366	1.86545
0.970466	0.975716	0.993032	0.963522	0.917344	0.907847	0.908434	0.932388	0.92198	0.994616	0.859911	0.871305	0.884836	0.826302	0.834927	0.896953	0.843823	0.862464	0.866761	0.86882	0.947268	0.873887	0.852932	0.941003	0.830109	0.871598	0.857701	0.867815	0.859461	0.866328	0.845612	0.880236	0.842751	0.854256	0.839688	0.829163	0.869057	0.874645	0.94293	0.86776	0.845997	0.849221	0.87293	0.872791	0.935094	0.869586	0.890773	0.871264	0.863104	0.931646
1.77587	1.68024	1.63278	1.49128	1.46659	1.33569	1.33044	1.32577	1.28758	1.31369	1.33724	1.27579	1.2714	1.25701	1.31897	1.29024	1.2654	1.28048	1.24587	1.19757	1.10873	1.10462	1.00949	1.01072	1.01018	0.997601	0.999594	0.99585	0.955816	0.946171	0.948944	0.956484	0.964379	1.0044	0.975684	0.982937	0.970676	0.987121	0.985208	1.00818	1.03092	0.998401	1.00909	1.02677	1.026	1.02909	0.996465	0.99379	0.977166	0.971004
0.981395	0.811417	0.981775	0.98376	0.779823	0.804993	0.794183	0.820173	0.796982	0.781326	0.828178	0.839514	0.818605	0.819704	0.836811	0.812358	0.804749	0.80497	0.814408	0.816509	0.842368	0.806152	0.797654	0.81784	0.834468	0.786687	0.834758	0.81914	0.815976	0.805987	0.804534	0.791583	0.796244	0.802718	0.816378	0.761508	0.810812	0.785868	0.812565	0.789681	0.808975	0.792417	0.791193	0.817568	0.77652	0.776231	0.765634	0.762127	0.746292	0.76405
2.80444	2.1683	3.20755	3.1295	2.74533	2.52774	2.51122	2.57427	2.26629	2.50488	2.76462	2.38396	2.45962	2.22843	2.10301	1.98476	1.83778	1.95893	2.16691	1.73438	1.68976	1.8608	1.70468	3.21039	2.8133	2.31821	2.1486	2.76251	2.25491	1.89727	1.97371	1.71823	1.42416	1.21971	1.21101	1.10696	1.07126	1.00372	1.07217	1.6711	3.78601	3.30371	3.23026	3.65206	3.41002	3.35158	2.88576	3.04676	3.49736	3.51378
1.00833	1.0189	1.02457	1.02456	1.00031	1.01855	1.03923	1.00636	0.971411	1.00847	0.978556	1.01053	1.03175	1.01868	1.04639	1.03613	1.0236	1.03497	1.019	1.04104	1.03547	1.08564	1.03312	1.05914	1.40347	2.00518	2.00539	2.27631	2.15902	2.34232	2.36618	2.53992	2.68935	2.56536	2.45229	4.32278	1.58664	2.17732	2.22367	2.23895	1.99171	1.79364	1.86041	1.80267	1.80054	1.70547	1.63666	1.7092	1.72956	1.71468
2.45726	2.23703	2.1357	2.14195	2.07005	1.99711	1.94929	1.86965	1.96626	1.87605	1.8532	1.84597	1.80571	1.84638	1.81848	1.84958	1.8447	1.92712	1.89185	1.98518	2.10123	2.16579	2.1837	2.08923	2.15106	2.1335	1.91773	2.11523	2.3758	2.54164	2.8161	2.71924	2.99818	2.64062	2.39884	3.37339	1.7617	2.05112	1.97943	2.01594	1.92432	1.82597	1.73719	1.65405	1.61762	1.40326	1.37383	1.43159	1.37407	1.34362
0.773726	0.76309	0.764072	0.763034	0.753236	0.776131	0.750302	0.769759	0.758678	0.753976	0.754939	0.776705	0.761808	0.751544	0.754209	0.763017	0.751105	0.768906	0.765059	0.75865	0.755462	0.759753	0.756389	0.75912	0.771462	0.74483	0.759652	0.762836	0.742116	0.758773	0.743865	0.764209	0.765496	0.778526	0.775985	0.729662	0.753633	0.71996	0.740691	0.747951	0.769436	0.80078	0.771057	0.771287	0.77017	0.769982	0.776185	0.731793	0.745171	0.728942
1.57598	1.31825	1.45636	1.36892	1.43113	1.3741	1.44522	1.26964	1.32494	1.2277	1.20334	1.37793	1.38501	1.4128	1.51683	1.6374	1.45178	1.42896	1.49497	1.45696	1.41765	1.48822	1.40037	1.39456	1.37842	1.41837	1.50311	1.40338	1.37444	1.46663	1.41862	1.48829	1.44342	1.48139	1.37481	1.53462	1.46402	1.39962	1.37623	1.3536	1.33001	1.3465	1.30243	1.32114	1.33607	1.23931	1.28017	1.26441	1.21027	1.28435
0.653022	0.656941	0.650151	0.650274	0.645704	0.642641	0.639676	0.63743	0.633617	0.637347	0.630198	0.630007	0.645656	0.643545	0.644577	0.65437	0.643141	0.642689	0.651625	0.636221	0.636878	0.63942	0.644173	0.645739	0.650999	0.666112	0.671802	0.690898	0.698476	0.705056	0.702544	0.712772	0.719806	0.722349	0.715228	0.686249	0.741194	0.720611	0.726368	0.727034	0.740727	0.744231	0.732669	0.743087	0.74594	0.745048	0.750177	0.755211	0.747405	0.759963
0.953631	0.976082	0.930454	0.964523	0.898923	0.885832	0.88941	0.893018	0.880773	0.838353	0.884216	0.860477	0.881176	0.88886	0.882846	0.870669	0.913717	0.88139	0.905271	0.891411	0.863287	0.898575	0.874118	0.911894	0.892686	0.929827	0.949044	0.98605	0.965769	0.966334	0.951593	0.933472	0.909593	0.913301	0.906788	0.925836	0.931961	0.922024	0.920359	0.9187	0.917047	0.936853	0.899989	0.902551	0.905127	0.896872	0.889622	0.867696	0.877349	0.887219
0.91435	0.924685	0.935257	0.953749	0.955393	0.957043	0.968094	0.934799	0.946457	0.944744	0.944617	0.889193	0.908133	0.910642	0.888414	0.897037	0.921294	0.89924	0.8737	0.909531	0.876495	0.907962	0.867277	0.881446	0.873725	0.847428	0.834299	0.831529	0.817889	0.804689	0.791908	0.802778	0.784599	0.778626	0.786021	0.794427	0.803016	0.796679	0.780117	0.809884	0.825212	0.815334	0.834703	0.837694	0.849401	0.846493	0.868992	0.865566	0.859721	0.87257
0.657221	0.644898	0.637646	0.652231	0.647671	0.643944	0.652235	0.647348	0.649687	0.63909	0.626882	0.651698	0.623278	0.618745	0.608998	0.612667	0.604414	0.616032	0.624528	0.632041	0.628124	0.626159	0.618427	0.62781	0.624432	0.635516	0.640298	0.653025	0.641494	0.653515	0.665969	0.662109	0.666472	0.672705	0.667889	0.633595	0.707533	0.675561	0.683131	0.689571	0.710396	0.730154	0.747938	0.756906	0.755791	0.751486	0.743025	0.716323	0.718801	0.713378
0.865749	0.859364	0.820546	0.854052	0.867354	0.837411	0.861314	0.851666	0.850319	0.848917	0.841207	0.84798	0.819987	0.835673	0.841404	0.873497	0.83243	0.821508	0.822544	0.842347	0.862831	0.788755	0.795707	0.814595	0.784647	0.75616	0.771555	0.812199	0.796531	0.796361	0.7881	0.780008	0.80437	0.779365	0.795089	0.762617	0.82347	0.82045	0.817453	0.827867	0.863808	0.852904	0.860017	0.877457	0.869924	0.827071	0.853182	0.880995	0.822175	0.818434
0.928758	0.940231	0.995059	0.938856	0.951506	0.949468	0.899179	0.975041	0.955391	0.97703	1.01076	1.04329	1.02358	1.0046	1.04656	1.00463	1.03226	1.03857	0.991546	0.918929	0.93205	0.86445	0.88922	0.957093	0.951933	0.937468	0.924365	0.924157	0.923948	0.903087	0.900533	0.90566	0.924136	0.943515	0.914081	0.886338	0.903625	0.921599	0.948179	0.950833	0.959918	0.969178	0.935051	0.885049	0.899687	0.891751	0.879831	0.889738	0.858203	0.857562
0.879653	0.878876	0.882495	0.873758	0.906867	0.864193	0.845607	0.812648	0.986972	0.796066	0.887693	0.81212	0.799828	0.78337	0.789204	0.800356	0.800058	0.797427	0.800386	0.828105	0.827904	0.848962	0.817764	0.825823	0.833904	0.829589	0.825319	0.842816	0.8523	0.788133	0.83641	0.834577	0.853986	0.859418	0.837716	0.851096	0.863602	0.851432	0.867156	0.825805	0.888325	0.874245	0.889294	0.891034	0.877904	0.92468	0.865403	0.856592	0.907745	0.891652
0.978387	0.976687	0.974992	0.973303	0.97162	0.998773	1.02096	1.02779	1.01545	1.00593	1.02099	1.00802	1.01122	1.01444	1.02029	1.00139	0.987472	1.00452	0.988257	1.00772	0.989092	0.978147	0.963006	0.961061	0.937821	0.954961	0.955569	0.966643	0.972205	0.955359	0.96658	0.958942	0.963353	0.981599	1.00853	0.9589	0.961743	0.96073	0.959718	0.958709	0.9538	0.951418	0.992027	0.997814	1.00292	1.00808	1.00766	1.00724	1.00683	1.00641
0.909482	0.931738	0.900559	0.922393	0.917782	0.908977	0.882598	0.841344	0.862248	0.884217	0.837691	0.855379	0.858601	0.829948	0.835156	0.84096	0.842693	0.842227	0.822872	0.841142	0.836951	0.847989	0.850366	0.838153	0.838295	0.85482	0.860103	0.87939	0.853353	0.859337	0.865404	0.871559	0.863024	0.854656	0.861387	0.868225	0.896986	0.874946	0.89433	0.870531	0.888618	0.934144	0.927902	0.933355	0.938872	0.925747	0.942034	0.948941	0.950683	0.946419
1.02716	1.04467	1.0628	1.0539	1.04514	1.03075	1.03254	1.14668	1.09558	1.10705	1.11876	1.1136	1.10849	1.15039	1.15486	1.15141	1.18749	1.16959	1.23514	1.22434	1.21085	1.18351	1.17157	1.1223	1.11853	1.12519	1.11461	1.11588	1.13427	1.14173	1.14908	1.14739	1.13582	1.1471	1.13224	1.14993	1.09367	1.11154	1.09315	1.09741	1.07206	1.06654	1.0423	1.05014	1.0593	1.03863	1.03624	1.00698	1.03378	1.03207
0.950039	0.929242	0.92141	0.919731	0.900358	0.894202	0.907563	0.916712	0.928184	0.915819	0.907449	0.913205	0.898195	0.902994	0.902897	0.903736	0.908907	0.925647	0.917688	0.914138	0.907238	0.907755	0.903513	0.891404	0.89382	0.887187	0.893019	0.898928	0.908753	0.908195	0.903248	0.899142	0.902949	0.888462	0.875106	0.862145	0.885931	0.86994	0.859328	0.85975	0.860173	0.860596	0.864645	0.868733	0.87286	0.860904	0.881773	0.869401	0.870677	0.866536
1.39521	1.46814	1.4646	1.59496	1.66855	1.59742	1.58339	1.55972	1.61004	1.5618	1.60374	1.54114	1.47568	1.45813	1.38854	1.32528	1.31301	1.30096	1.31041	1.271	1.23707	1.20001	1.12389	1.06425	1.04777	1.08424	1.1108	1.10888	1.10696	1.07948	1.10327	1.09434	1.07424	1.05487	1.03432	1.01199	1.03775	1.00065	0.986538	1.00546	1.00521	1.00497	0.982292	0.948031	0.925668	0.940616	0.985858	0.951383	0.941906	0.956801
																				1.17771	1.15242	1.10183	1.05549	1.07476	1.0701	1.1157	1.16585	1.18102	1.16413	1.14771	1.18736	1.22983	1.19079	1.15415	1.21302	1.13021	1.16364	1.12673	1.15259	1.15744	1.17492	1.13718	1.10178	1.05411	1.05189	1.05836	1.02127	1.00024	0.980052
0.948349	0.941636	0.96733	0.961835	0.980721	0.96411	0.983597	0.958105	1.01084	1.01531	1.01385	1.09629	1.24157	1.13675	0.987826	0.836965	0.889981	0.947761	1.0553	1.08897	1.14696	1.16763	1.20877	1.06968	1.0552	1.05748	1.03156	1.02969	1.02783	1.01814	1.03049	1.02457	1.03302	1.05343	1.06509	1.0742	1.04666	1.06844	1.05372	1.06486	1.07489	1.09085	1.11309	1.09286	1.0977	1.08515	1.09026	1.11647	1.11807	1.11764
1.29934	1.35789	1.20505	1.19809	1.23142	1.15486	1.13474	1.16919	1.17323	1.10643	1.12963	1.08887	1.08325	1.06759	1.03061	1.02217	1.0127	1.05024	0.938774	0.916294	0.929053	0.936099	0.910744	0.906036	0.926467	0.910846	0.910574	0.894566	0.909969	0.905491	0.88838	0.909036	0.894033	0.910645	0.901007	0.937696	0.944534	0.906448	0.941339	0.944668	0.954122	0.972267	0.962929	0.984135	1.00025	1.04832	1.0003	1.03034	1.04308	0.982833
0.965033	0.847707	0.809882	0.862498	0.871075	0.96941	0.920182	0.874054	0.835531	0.874791	0.917921	0.878187	0.860339	0.847356	1.0443	0.8577	0.864934	0.835193	0.880292	0.833721	0.83135	0.828992	0.840911	0.823984	0.807725	0.812691	0.794978	0.821959	0.800856	0.830924	0.825925	0.817566	0.82359	0.835016	0.805161	0.786444	0.806441	0.772998	0.771254	0.769518	0.754555	0.772625	0.771352	0.763591	0.756406	0.749356	0.734342	0.717352	0.719194	0.712602
0.730044	0.724685	0.719404	0.72316	0.71203	0.708688	0.704175	0.693866	0.674243	0.68856	0.685523	0.689149	0.682633	0.686389	0.689219	0.707504	0.698106	0.696904	0.696009	0.691463	0.710901	0.692285	0.704563	0.706746	0.718067	0.728076	0.751403	0.740354	0.745743	0.761371	0.782177	0.837966	0.902325	0.977392	0.798867	0.775988	0.808562	0.779853	0.769068	0.746883	0.755323	0.744149	0.753866	0.754989	0.759039	0.790701	0.798974	0.795126	0.794879	0.790993
0.882902	0.875889	0.868987	0.87413	0.879333	0.880306	0.869938	0.876561	0.868875	0.85644	0.844355	0.841663	0.838988	0.842071	0.830701	0.856431	0.851094	0.87022	0.882932	0.861415	0.853663	0.838041	0.819749	0.810751	0.822329	0.795861	0.771525	0.762513	0.779327	0.77502	0.766652	0.76403	0.783416	0.773058	0.769724	0.74205	0.791448	0.778771	0.779007	0.764969	0.769283	0.773646	0.777019	0.791844	0.805552	0.819744	0.816693	0.809071	0.802677	0.787447
0.81325	0.83342	0.820364	0.811111	0.779169	0.799092	0.805629	0.794362	0.807716	0.799423	0.803863	0.780856	0.782573	0.746648	0.760455	0.761622	0.762793	0.797535	0.804067	0.76571	0.794833	0.80371	0.794863	0.791072	0.810431	0.812323	0.799334	0.786754	0.789573	0.791388	0.795737	0.793235	0.752872	0.795612	0.794408	0.781332	0.768643	0.742061	0.75848	0.741054	0.751424	0.749563	0.74771	0.713404	0.767345	0.745524	0.72491	0.725923	0.726939	0.727958
1.30461	1.30404	1.27637	1.24513	1.25291	1.34528	1.46369	1.48551	1.508	1.51632	1.52473	1.42099	1.34192	1.3232	1.2184	1.4101	1.436	1.46286	1.46601	1.49784	1.47494	1.30344	1.29339	1.30413	1.31505	1.25903	1.2076	1.1569	1.18878	1.27598	0.957686	1.17469	1.12226	1.07431	1.38407	1.31073	1.24477	1.41125	1.20294	1.04821	1.08142	1.11681	1.00872	0.825869	0.982925	0.924833	1.05633	1.01696	0.980423	0.934726
0.974277	0.956844	0.940023	0.940981	0.937548	0.927363	0.917398	0.920212	0.915183	0.910083	0.908083	0.914147	0.906588	0.891175	0.888301	0.885445	0.880563	0.875735	0.870959	0.866235	0.878001	0.890091	0.885358	0.880675	0.858184	0.875334	0.893185	0.887977	0.882829	0.866759	0.851263	0.839095	0.785642	0.812201	0.813205	0.785992	0.798508	0.810417	0.822686	0.817364	0.858578	0.87764	0.88991	0.862186	0.851123	0.836546	0.82246	0.818702	0.830968	0.781226
1.14849	1.21388	1.23372	1.34635	1.16357	1.10004	1.11704	1.11296	1.10987	1.15596	1.11258	1.15651	1.20406	1.20675	1.23142	1.30121	1.28654	1.24971	1.21374	1.28552	1.2407	1.16672	1.30379	1.27124	1.24028	1.21079	1.59061	1.62052	1.39763	1.22864	1.09611	1.17138	1.25775	1.22532	1.11074	1.55251	1.28933	1.37809	1.41099	1.29244	1.30793	1.57188	1.29437	1.35279	1.212	1.30371	1.27837	1.2337	1.42689	1.16991
0.752124	0.748385	0.738536	0.734114	0.724951	0.731995	0.734745	0.729399	0.72413	0.724837	0.726015	0.726294	0.725969	0.715405	0.719597	0.714511	0.716531	0.719522	0.718417	0.71254	0.706826	0.717511	0.719221	0.730448	0.710667	0.719762	0.716023	0.734812	0.73077	0.722179	0.733063	0.712935	0.735315	0.724342	0.710436	0.724981	0.740134	0.72864	0.734794	0.721656	0.730825	0.726706	0.724346	0.716629	0.735644	0.722614	0.719766	0.712339	0.712707	0.71843
0.714612	0.72966	0.717144	0.713986	0.695415	0.752382	0.75171	0.747891	0.755376	0.720997	0.716912	0.739636	0.738515	0.74082	0.752289	0.755654	0.797744	0.785362	0.811404	0.832906	0.790082	0.78819	0.811992	0.800301	0.762159	0.787109	0.812619	0.807078	0.802116	0.813102	0.824392	0.836001	0.847941	0.871091	0.833193	0.828706	0.824266	0.819873	0.823061	0.872595	0.858803	0.856546	0.827735	0.818709	0.825467	0.832337	0.85673	0.879013	0.875249	0.840759
0.801092	0.801021	0.778902	0.76212	0.761651	0.741267	0.747044	0.7173	0.725573	0.740066	0.733636	0.731607	0.72959	0.727584	0.721167	0.728946	0.730646	0.743765	0.735926	0.738889	0.718264	0.721134	0.713472	0.696544	0.6804	0.6902	0.695473	0.711373	0.709121	0.711062	0.702807	0.694741	0.686859	0.682686	0.662567	0.659366	0.672414	0.685988	0.693247	0.690172	0.687124	0.681594	0.677729	0.671426	0.681561	0.692007	0.675537	0.693399	0.687773	0.678372
1.00869	0.987364	1.01351	0.995479	1.01524	0.986295	1.00038	0.989414	1.01502	1.00697	1.00962	0.991714	1.00996	1.01547	1.02513	0.999081	1.0221	1.12186	1.03159	1.12031	1.1445	1.21528	1.27354	1.22982	1.29646	1.33843	1.46788	1.30652	1.19613	1.28672	1.29945	1.40709	1.42639	1.48304	1.45566	1.56966	1.27697	1.28709	1.24566	1.2271	1.18741	1.16321	1.14777	1.14199	1.11009	1.08499	1.08087	1.08672	1.08684	1.09644
1.7853	1.80881	1.76057	1.7746	1.78885	1.722	1.68024	1.64045	1.82048	1.78907	1.65272	1.59969	1.73682	1.62685	1.67627	1.72878	1.67957	1.76406	1.65235	1.55395	1.8344	1.73956	1.6125	1.45044	1.51917	1.59097	1.43189	1.30173	1.47196	1.48601	1.35038	1.38104	1.50083	1.34197	1.38044	1.36633	1.35251	1.33897	1.42988	1.36771	1.4777	1.47165	1.36877	1.38495	1.40151	1.40157	1.44528	1.42779	1.48807	1.47453
0.739215	0.761299	0.702316	0.733373	0.787955	0.780036	0.742873	0.714673	0.731013	0.746333	0.765657	0.774414	0.765644	0.748562	0.804605	0.774793	0.732419	0.7369	0.741436	0.752337	0.74458	0.739055	0.739551	0.752995	0.761263	0.752042	0.757758	0.709939	0.761	0.76838	0.732544	0.744001	0.753764	0.785692	0.790715	0.795803	0.800956	0.7973	0.793678	0.781736	0.79039	0.782745	0.786372	0.772283	0.75869	0.745567	0.755448	0.758146	0.758237	0.767738
1.46424	1.42071	1.25142	1.33812	1.79343	1.32482	1.39415	1.47114	1.59591	1.52558	1.6424	1.83629	1.64849	1.71239	1.78144	1.85628	1.9377	1.81914	1.75817	1.68823	1.97016	1.69437	1.69678	1.69921	1.65673	1.61631	1.52383	1.44135	1.46622	1.51557	1.56837	1.53631	1.62497	1.58264	1.58082	1.57902	1.52638	1.47713	1.43096	1.61787	1.49974	1.49991	1.49199	1.51548	1.50087	1.48653	1.47246	1.44326	1.51332	1.54481
0.831746	0.828713	0.804199	0.781094	0.797217	0.797933	0.773293	0.788726	0.776417	0.799872	0.78991	0.780194	0.76942	0.789638	0.78294	0.776354	0.769879	0.777697	0.785676	0.775871	0.789274	0.797893	0.78636	0.785627	0.784895	0.784165	0.776392	0.795397	0.783218	0.785452	0.787699	0.79628	0.80505	0.823374	0.84977	0.837701	0.886772	0.87781	0.866149	0.854793	0.866875	0.878566	0.890576	0.90292	0.899211	0.904989	0.938806	0.947604	0.937919	0.982878
1.00232	1.06477	1.05647	1.01596	1.06591	0.992064	1.03498	1.0376	1.05454	1.00716	1.11251	1.01025	1.11104	1.12584	1.20706	1.28424	1.16036	1.02891	1.11214	1.0794	1.0692	0.977741	0.96879	0.983707	0.955382	1.01358	1.00642	0.979915	1.06064	1.01371	1.0462	1.00706	0.997139	1.01092	1.01792	1.08619	0.990398	0.994663	1.03649	1.22012	1.12401	1.09908	1.20443	1.19552	1.24557	1.2722	1.29999	1.34719	1.45335	1.28842
0.758726	0.770202	0.780409	0.753445	0.707151	0.717463	0.702735	0.713324	0.716726	0.73209	0.724157	0.704422	0.668919	0.710588	0.711962	0.712416	0.763467	0.675094	0.749183	0.743723	0.738341	0.733037	0.657804	0.67012	0.658598	0.647466	0.636704	0.657448	0.67959	0.681937	0.660071	0.678016	0.68958	0.693571	0.673152	0.669367	0.717259	0.672353	0.667809	0.668718	0.709743	0.713484	0.730783	0.732745	0.730181	0.737457	0.74139	0.732405	0.731967	0.729554
1.03796	1.02479	1.03025	1.05822	1.10123	1.11827	1.0744	1.04982	1.08799	1.09141	1.0448	1.07198	1.08386	1.04026	1.02439	1.009	1.01224	1.00829	1.03297	1.06404	1.09241	1.07403	1.03694	1.01542	1.02439	1.03352	1.04891	1.01994	1.01497	1.0235	1.03217	1.05437	1.04287	1.02613	1.01464	1.00807	0.980541	1.00616	1.00759	1.00903	1.01374	0.998645	1.02615	1.03069	1.04463	1.03314	1.0219	1.03481	1.02023	1.01283
2.83143	2.78465	2.72021	2.6189	2.63866	2.50985	2.3272	2.34568	2.68942	2.79051	2.66772	2.33582	2.34773	2.16253	2.07689	1.96338	1.68503	1.5528	1.44955	1.39385	1.3065	1.31712	1.33838	1.34109	1.30697	1.25666	1.28541	1.24386	1.24293	1.24706	1.17745	1.18711	1.16159	1.15899	1.12441	1.16199	1.08812	1.11367	1.10742	1.13629	1.18067	1.15487	1.20694	1.16423	1.1556	1.09729	1.11505	1.14185	1.09029	1.1065
1.04903	1.06328	1.04008	0.9777	0.91456	0.945152	0.994778	0.896065	0.880416	0.865304	1.08628	1.45882	1.39881	1.34355	1.29248	1.26539	1.23942	1.21448	1.22276	1.23115	1.23965	1.24828	1.25702	1.36459	1.38139	1.39862	1.41628	1.43439	1.45297	1.47204	1.4592	1.45932	1.45944	1.45956	1.48754	1.43716	1.39009	1.54524	1.53712	1.52908	1.52112	1.51325	1.50545	1.49774	1.49011	1.48255	1.47507	1.32017	1.40201	1.49468
0.799878	0.780101	0.748512	0.742301	0.738139	0.730276	0.741012	0.75502	0.712015	0.713177	0.715155	0.727036	0.694973	0.708212	0.704279	0.698129	0.70604	0.707021	0.723927	0.726585	0.725483	0.70803	0.725535	0.719808	0.717825	0.733027	0.742835	0.734965	0.735555	0.73783	0.74277	0.758184	0.75502	0.74824	0.743394	0.766698	0.79151	0.874621	0.910641	0.824135	0.868172	0.856481	0.845101	0.834019	0.9232	1.03374	0.99334	0.93841	0.918344	0.995287
1.02905	1.01018	0.993457	1.0083	1.03206	1.03121	1.03035	1.03436	1.03656	1.03241	1.04017	1.04295	1.01593	1.01172	1.01563	1.0153	1.01205	1.02011	1.01714	1.01418	1.02453	1.01266	0.99852	1.01294	1.00757	0.98825	1.00524	0.996883	0.988666	0.982691	0.964711	0.947377	0.930655	0.922666	0.914813	0.907093	0.89441	0.882078	0.879241	0.910851	0.907716	0.898568	0.889602	0.880814	0.884627	0.884662	0.884697	0.884732	0.870273	0.852182
0.964834	0.936058	0.908948	0.883364	0.979779	0.883859	0.90899	0.944131	0.982099	0.878097	0.913578	0.952048	0.944713	0.93749	0.875665	0.871814	0.850567	0.880552	0.921562	0.8793	0.840743	0.846239	0.851808	0.85745	0.943432	0.910206	0.929093	0.919452	0.900436	0.88219	0.9054	0.929865	0.948549	0.875194	0.897579	0.921141	0.945972	0.932529	0.944294	0.954438	0.964802	0.971436	0.986646	0.98004	0.97178	0.963658	0.956866	0.952586	0.925937	0.945564
3.19362	3.02029	2.6098	2.3583	2.33569	2.17786	2.05832	1.84135	1.81813	1.76389	1.6873	1.60371	1.52668	1.50556	1.48377	1.44084	1.46317	1.50998	1.43813	1.48938	1.46378	1.63184	1.58081	1.52787	1.4417	1.39154	1.39327	1.44398	1.37271	1.36167	1.28362	1.2174	1.23943	1.33212	1.25776	1.26788	1.17914	1.17733	1.10453	1.16824	1.1239	1.10457	1.13842	1.17416	1.13925	1.16676	1.20875	1.25095	1.2312	1.21206
0.749554	0.775506	0.758758	0.786513	0.796776	0.8028	0.808915	0.815497	0.830371	0.837688	0.833759	0.82811	0.858656	0.850885	0.846463	0.856584	0.86695	0.876122	0.866199	0.872181	0.885932	0.900124	0.891869	0.896669	0.892741	0.874822	0.865639	0.85571	0.847349	0.851596	0.849649	0.872134	0.837381	0.871749	0.854809	0.838516	0.858551	0.847631	0.843734	0.839874	0.836048	0.848957	0.857838	0.850659	0.8436	0.853567	0.868999	0.834975	0.870643	0.878042
1.32264	1.3354	1.34974	1.3644	1.37938	1.39468	1.38454	1.37454	1.36468	1.35497	1.32602	1.29828	1.3094	1.2793	1.25056	1.282	1.24696	1.21378	1.21948	1.22522	1.23103	1.16537	1.21535	1.20273	1.24702	1.2267	1.22062	1.23025	1.21645	1.20296	1.18976	1.1579	1.17381	1.17419	1.22111	1.16538	1.11451	1.11579	1.11707	1.11836	1.10425	1.09049	1.07707	1.08006	1.00081	1.0274	1.05545	0.979338	1.00404	1.0027
0.891529	0.89088	0.890231	0.878563	0.857026	0.85098	0.845565	0.848541	0.854315	0.841982	0.845701	0.844845	0.816744	0.803701	0.802365	0.774951	0.788523	0.775145	0.796743	0.805777	0.793573	0.782177	0.781449	0.810786	0.806628	0.822206	0.823833	0.831226	0.808291	0.786587	0.805781	0.767263	0.764647	0.75628	0.762561	0.759881	0.8087	0.801233	0.801681	0.808479	0.829963	0.833152	0.82621	0.816626	0.786116	0.794288	0.777714	0.782803	0.761689	0.765683
1.156	1.12171	1.10451	1.1284	1.11487	1.10165	1.10235	1.07626	1.07887	1.0722	1.02897	0.989084	0.952178	0.917926	0.913142	0.908408	0.920911	0.90005	0.880112	0.922413	0.898835	0.972631	0.852584	0.887475	0.943805	1.00777	0.985615	0.988605	1.01034	1.0174	1.04715	0.998666	1.00856	1.05855	1.10325	1.15189	1.01038	1.05063	1.06829	1.08656	1.04796	1.10364	1.09883	1.11763	1.12034	1.13039	1.12773	1.11929	1.11406	1.17201
0.688531	0.695075	0.707051	0.692101	0.692308	0.686655	0.682073	0.702697	0.699694	0.700985	0.707411	0.705364	0.71083	0.71077	0.725311	0.712472	0.722227	0.722265	0.725041	0.720403	0.716789	0.726056	0.735567	0.746244	0.764005	0.778	0.786891	0.778288	0.782843	0.76685	0.775599	0.776479	0.798319	0.765864	0.782988	0.753608	0.812101	0.811124	0.808245	0.805386	0.811257	0.820734	0.801802	0.791674	0.787346	0.790109	0.791348	0.794323	0.783716	0.775991
0.990582	0.99718	1.00397	0.978091	0.977816	0.994977	0.983608	0.987955	0.988656	0.994635	1.00295	0.993404	0.966613	0.965255	0.971922	0.982916	1.00787	0.981478	0.996736	0.991782	0.986877	0.98202	0.992609	1.00269	0.990039	0.979367	0.993328	0.98506	0.975416	0.978683	0.969391	0.963154	0.975179	0.987507	0.973287	0.95947	0.979648	0.978063	0.973287	0.986362	0.975851	0.981443	0.978735	0.975236	1.0072	0.99626	0.986768	0.982299	0.97787	0.983484
1.01853	0.926701	1.03348	0.983788	0.985192	0.986313	0.961054	0.93724	0.917209	0.898017	0.879612	0.85897	0.849219	0.860467	0.872016	0.855566	0.859827	0.887024	0.877269	0.878755	0.934135	0.93741	0.940995	1.00359	1.02411	0.972552	1.0199	1.00467	1.01931	0.983707	0.98954	1.00458	1.01469	1.004	1.03927	1.04455	1.04722	1.08036	1.10104	1.11552	1.13869	1.21514	1.21926	1.19543	1.21768	1.1994	1.19885	1.23049	1.30295	1.25178
																					1.19838	1.1211	1.13702	1.10487	1.07449	1.0728	1.07077	1.13151	1.09263	1.05634	1.07598	1.04049	1.08991	1.04457	1.05036	1.0562	1.08241	1.09365	1.08063	1.09257	1.10317	1.11467	1.08781	1.15938	1.1445	1.13001	1.15328	1.14093	1.12884
0.647007	0.645203	0.629691	0.628575	0.627237	0.619682	0.627182	0.62493	0.622694	0.617451	0.613135	0.60277	0.592749	0.595779	0.604954	0.597885	0.592065	0.586356	0.588008	0.575425	0.567433	0.546496	0.56189	0.564903	0.564848	0.56206	0.563689	0.556902	0.567871	0.571062	0.574289	0.559544	0.563671	0.566472	0.572209	0.540642	0.58409	0.569097	0.566095	0.563123	0.560183	0.554979	0.563144	0.562608	0.562074	0.554802	0.557046	0.530637	0.529803	0.528971
0.661192	0.638574	0.617453	0.609531	0.601809	0.604941	0.608106	0.595802	0.605356	0.578947	0.611405	0.617802	0.624335	0.587845	0.592707	0.598982	0.605392	0.613949	0.622752	0.623614	0.577905	0.588228	0.552811	0.636215	0.596965	0.562276	0.580878	0.590111	0.599643	0.624113	0.650665	0.635054	0.620174	0.605976	0.592413	0.579444	0.605444	0.608238	0.571303	0.671342	0.637728	0.607319	0.631275	0.59706	0.601953	0.616164	0.602377	0.589193	0.607847	0.586816
																		0.741684	0.776448	0.781817	0.78726	0.790952	0.794678	0.782471	0.770633	0.805947	0.815187	0.815182	0.812558	0.80995	0.80272	0.805865	0.809034	0.812228	0.815448	0.843702	0.818957	0.809477	0.814009	0.818592	0.823227	0.827914	0.824039	0.820199	0.818249	0.823821	0.818606	0.813457	0.808372
0.945566	0.946303	0.935443	0.934008	0.95029	0.946471	0.913953	0.890011	0.894974	0.89639	0.896308	0.868889	0.923082	0.916563	0.908557	0.943493	0.931443	0.93079	0.937341	0.942149	0.942349	0.906668	0.916758	0.918767	0.894065	0.93938	0.939249	0.927915	0.934329	0.924928	0.907791	0.919961	0.928462	0.906725	0.934913	0.909863	0.900398	0.890956	0.903527	0.910184	0.922547	0.902898	0.883071	0.906851	0.889122	0.872617	0.869964	0.878199	0.844222	0.840895
0.792839	0.762767	0.7649	0.75278	0.751703	0.747265	0.767324	0.754412	0.726356	0.732862	0.743928	0.740651	0.733116	0.759382	0.756308	0.785151	0.741914	0.767706	0.773166	0.779697	0.790061	0.786792	0.792922	0.790132	0.77613	0.775851	0.784905	0.795821	0.778872	0.784097	0.794904	0.775751	0.791595	0.780283	0.792212	0.774651	0.782395	0.790296	0.798359	0.806587	0.794975	0.79676	0.798554	0.785684	0.791779	0.79797	0.789346	0.804507	0.816424	0.803051
0.626998	0.660788	0.628652	0.617599	0.617015	0.616432	0.623933	0.633048	0.634355	0.654868	0.650981	0.677765	0.678969	0.680177	0.68139	0.686215	0.676344	0.675719	0.675479	0.655273	0.665015	0.663411	0.664319	0.66523	0.673756	0.662994	0.678169	0.665941	0.703528	0.677503	0.685624	0.676567	0.681358	0.671154	0.684254	0.680599	0.676983	0.672376	0.66783	0.708699	0.701929	0.691002	0.691707	0.691924	0.679286	0.678959	0.678632	0.678305	0.677979	0.677653
0.818239	0.813992	0.803735	0.813127	0.798295	0.805622	0.786294	0.818555	0.786475	0.784616	0.778709	0.780631	0.797082	0.772416	0.77433	0.806712	0.774906	0.769918	0.772548	0.7994	0.813079	0.808441	0.822122	0.859684	0.834884	0.831871	0.806886	0.789428	0.793792	0.795728	0.810518	0.824898	0.812938	0.824489	0.822294	0.819373	0.830776	0.827797	0.852741	0.822593	0.831907	0.830037	0.817058	0.814619	0.802065	0.790119	0.792312	0.787917	0.791544	0.781879
1.21887	1.26025	1.23962	1.26583	1.28423	1.27214	1.28328	1.25394	1.27682	1.35481	1.33724	1.30644	1.25889	1.25747	1.23707	1.26976	1.28508	1.30682	1.20425	1.19771	1.26056	1.23091	1.2312	1.29341	1.20803	1.22881	1.20572	1.23773	1.22609	1.14221	1.11704	1.12554	1.13837	1.13363	1.14505	1.14422	1.0744	1.10008	1.13338	1.1182	1.08849	1.15507	1.12311	1.13562	1.14493	1.13251	1.12035	1.10564	1.10084	1.04742
1.65863	1.81713	1.77311	1.79166	1.71701	2.20882	1.61233	1.56255	1.51575	1.54188	1.6874	1.51456	1.45899	1.48276	1.37661	1.49925	1.35273	1.3603	1.38313	1.30214	1.24315	1.18927	1.13987	1.25997	1.17267	1.14304	1.11027	1.07511	1.08463	1.11897	1.13113	1.14711	1.16356	1.19889	1.03899	1.09305	1.09291	1.09278	1.09264	1.10664	1.10162	1.11647	1.13172	1.07507	1.12653	1.18316	1.17713	1.17066	1.16116	1.1943
2.20687	2.1739	2.14189	2.23569	2.33808	2.4503	2.57383	2.81967	3.11741	3.48547	2.99759	3.09824	3.2059	3.07488	3.10347	2.92642	2.65953	2.9421	2.48985	2.1581	1.96103	1.79693	1.59905	1.44042	1.42658	1.35977	1.29895	1.2813	1.26413	1.24742	1.14797	1.12595	1.10475	1.08434	1.16325	1.17721	1.09654	1.09506	1.08198	1.10313	1.12513	1.11048	1.09621	1.0823	1.09498	1.10796	1.12124	1.13486	1.12548	1.11627
0.978429	0.978821	1.01031	0.999531	1.04679	1.02248	1.04631	1.07129	1.03229	0.99602	1.03753	1.01116	0.948034	0.994591	1.02978	0.96322	1.05466	1.03388	1.01629	0.970662	0.96868	0.974533	0.975566	0.979735	0.941255	0.953382	0.956709	0.956114	1.04636	0.984497	0.975019	0.944238	0.944833	0.958346	0.986563	0.962458	0.965415	0.944659	0.910331	0.900211	0.968984	0.975936	0.981464	1.0303	1.11638	1.06511	1.07392	1.07935	1.08482	1.09035
1.97472	1.41246	1.50869	1.61899	1.57763	2.14084	1.82975	1.82366	1.97633	1.99925	2.02272	1.88346	1.9041	1.97174	1.76774	1.98022	1.72483	1.53085	1.65255	1.81769	1.70729	1.64665	1.67959	1.72218	1.53557	1.52638	1.57814	1.6258	1.48627	1.42935	1.5501	1.44234	1.4066	1.37057	1.41945	1.74919	1.30433	1.25074	1.36548	1.2904	1.31067	1.32157	1.3822	1.26284	1.30894	1.2318	1.20718	1.16792	1.18593	1.32933
0.945392	0.95576	0.947741	0.95839	0.954166	0.937793	0.939042	0.940295	0.939588	0.942544	0.926479	0.929953	0.92096	0.920001	0.929802	0.934486	0.935727	0.934372	0.94118	0.940572	0.942575	0.949654	0.955798	0.954686	0.952187	0.954651	0.955325	0.955999	0.964411	0.972972	0.963446	0.963882	0.964318	0.981566	0.979855	0.978149	0.974611	0.968768	0.969215	0.969663	0.97011	0.962828	0.95951	0.957537	0.959106	0.960681	0.96949	0.978462	0.968078	0.96545
0.601453	0.620982	0.624801	0.598233	0.587733	0.620131	0.579889	0.611154	0.628384	0.62686	0.60109	0.642763	0.687525	0.691668	0.750772	0.752807	0.754853	0.724231	0.695997	0.67651	0.6989	0.66973	0.642897	0.581156	0.629566	0.63821	0.647094	0.629695	0.646385	0.679297	0.6911	0.660806	0.671836	0.813579	0.68163	0.688343	0.714675	0.669238	0.66105	0.653061	0.596047	0.619405	0.644669	0.643536	0.642406	0.619117	0.662564	0.674665	0.687216	0.700243
																													1.07013	1.07719	1.08434	1.07396	1.11027	1.11269	1.11512	1.11756	1.17034	1.21774	1.2103	1.20653	1.20278	1.19905	1.19534	1.19166	1.188	1.18436	1.18075	1.17715	1.15146
1.11542	1.13898	1.16356	1.09144	1.17671	1.25719	1.34949	1.29813	1.28051	1.26335	1.2022	1.97325	1.24402	1.49046	1.6705	1.54492	1.46308	1.51943	1.42742	1.34592	1.27322	1.20798	1.14909	1.09568	1.04702	1.00249	0.971151	0.984242	0.969343	1.01879	1.03769	0.998302	0.99485	0.982933	0.936138	0.95916	0.892434	0.962801	0.909011	0.970205	0.898997	0.909843	0.868029	0.829889	0.861513	0.895643	0.932588	0.972713	0.985114	0.997835
0.965684	0.921618	0.946445	0.889404	0.927765	0.969585	0.936384	1.01954	0.978423	0.995566	1.01332	1.03506	1.05775	1.00936	0.965197	0.996844	1.02786	1.03236	1.03931	1.04634	1.03753	1.03789	1.04141	1.04496	1.04493	1.02258	1.02487	1.02716	1.02947	1.02071	1.01677	1.01779	1.01882	1.01984	1.02284	1.02585	1.02888	1.03587	1.02825	1.02506	1.02188	1.01872	1.02403	1.0294	1.03482	1.03802	1.03733	1.03664	1.05592	1.05018
0.699008	0.678622	0.693835	0.677789	0.688679	0.686805	0.669866	0.661878	0.659335	0.656812	0.654309	0.651275	0.651195	0.634518	0.623161	0.634087	0.620923	0.598707	0.574736	0.588094	0.58821	0.588325	0.593254	0.594023	0.588887	0.603951	0.612335	0.60086	0.599303	0.611992	0.608396	0.604842	0.600685	0.596584	0.574627	0.60037	0.628528	0.600102	0.586412	0.577549	0.585377	0.566106	0.567931	0.549992	0.548369	0.546756	0.557018	0.554439	0.564281	0.551517
1.05329	1.04054	1.05102	1.02376	1.02139	1.02048	1.0022	0.945705	0.99616	0.938591	0.939888	0.949388	0.961807	0.95024	0.955581	0.949968	0.940218	0.944016	0.923168	0.894766	0.917497	0.897638	0.917004	0.921077	0.925186	0.933424	0.896957	0.933515	0.910831	0.928949	0.873538	0.916597	0.90978	0.914968	0.905909	0.884206	0.934174	0.909605	0.898693	0.882743	0.865602	0.868469	0.849731	0.861714	0.87063	0.87108	0.855725	0.847945	0.8439	0.839893
0.861433	0.863975	0.830623	0.858044	0.827553	0.836529	0.845701	0.863978	0.822706	0.857252	0.845205	0.833271	0.847092	0.844064	0.84551	0.84696	0.848415	0.849875	0.85134	0.85281	0.841429	0.873693	0.873298	0.975307	1.10724	1.12111	1.10538	1.02989	1.00061	0.989827	0.965816	0.982307	1.10552	1.0859	1.06695	1.16053	1.02926	1.02815	1.00413	1.09186	1.08157	1.07147	1.06155	1.09463	1.12984	1.20334	1.24175	1.24977	1.23082	1.21244
1.73362	1.86683	2.02221	2.20581	2.31221	2.53037	2.48453	2.44032	2.09723	1.86582	1.68041	1.52851	1.4018	1.37904	1.39666	1.35569	1.42463	1.58706	1.44344	1.3617	1.54851	1.37111	1.35002	1.70527	1.76197	1.71362	1.37706	1.50494	2.31596	2.34891	2.3828	2.55384	1.97416	2.10234	2.24832	2.01076	1.8186	1.61462	2.2546	1.9514	2.16408	1.95634	2.22981	2.59216	2.80873	2.80173	2.84245	2.88438	1.93568	2.89551
0.967899	0.939434	0.980223	0.988163	0.996233	0.991131	1.03389	1.00725	0.99866	0.990214	0.981911	0.973746	1.00951	1.048	1.04382	1.0529	1.05451	1.06203	1.0653	1.07602	1.08696	1.07949	1.07212	1.05847	1.04697	1.05495	1.06305	1.09086	1.12016	1.0627	1.04681	1.03139	1.01641	0.971967	0.977219	0.982528	0.947819	0.968466	0.990033	1.02387	0.998608	1.04437	1.05213	1.06001	1.0743	1.08897	1.065	1.04205	1.05957	1.04935
1.11778	1.16129	1.13918	1.09057	1.13193	1.12666	1.13393	1.12548	1.11483	1.11579	1.07868	1.0832	1.09189	1.09784	1.07254	1.06803	1.06991	1.04457	1.09125	1.06046	1.06951	1.08665	1.09519	1.09933	1.09093	1.09126	1.09112	1.10433	1.09122	1.07682	1.07739	1.09873	1.12593	1.09872	1.09431	1.13781	1.09234	1.11031	1.10147	1.11162	1.10669	1.10181	1.09697	1.08243	1.08565	1.0759	1.06633	1.0449	1.02432	1.00453
0.918922	0.915696	0.912494	0.927529	0.943069	0.935322	0.927701	0.920204	0.912826	0.905567	0.920909	0.93678	0.953208	0.970222	0.975916	0.937588	0.937835	0.938084	0.938332	1.01227	0.971705	0.934266	0.891188	0.851908	0.860999	0.868505	0.963619	0.934263	0.906642	0.905645	0.904651	0.903659	0.902669	0.901681	0.900695	0.899712	0.935015	0.973203	0.981061	0.989047	0.997164	1.02477	1.05871	1.05909	1.05946	1.05983	1.06021	1.01826	1.05952	1.11527
1.02556	0.987255	0.951709	0.967568	0.983964	0.985233	0.96412	0.964009	0.963899	0.951623	0.957636	0.963727	0.969895	0.976143	0.982471	0.988883	0.995378	1.00196	0.987438	0.996144	0.996534	1.00143	0.980944	0.961277	0.940296	0.964103	0.936134	0.887485	0.897934	0.908633	0.871825	0.895522	0.886992	0.878622	0.870409	0.862348	0.854435	0.846665	0.839036	0.879957	0.80988	0.866475	0.857044	0.856047	0.839084	0.82278	0.807098	0.823338	0.833989	0.84492
0.912415	0.907371	0.928947	0.915909	0.893968	0.903899	0.914053	0.872343	0.889525	0.881081	0.872797	0.864666	0.856686	0.848851	0.819137	0.791432	0.811069	0.831706	0.78767	0.799162	0.810995	0.81654	0.822162	0.827862	0.806917	0.817498	0.825783	0.834238	0.842868	0.851679	0.863116	0.864571	0.856744	0.849058	0.841508	0.840474	0.839443	0.838414	0.837388	0.841323	0.845296	0.849306	0.853355	0.857442	0.861568	0.862294	0.863022	0.860325	0.857646	0.854983
0.783498	0.76093	0.739626	0.741785	0.743957	0.778395	0.755834	0.752197	0.773982	0.768419	0.762935	0.733118	0.740305	0.747635	0.73767	0.727967	0.718516	0.729919	0.741691	0.733219	0.74988	0.767315	0.748351	0.672067	0.708567	0.725492	0.752464	0.748641	0.744857	0.74111	0.731343	0.737844	0.735845	0.728086	0.72531	0.740714	0.756788	0.750746	0.7448	0.732673	0.721135	0.740781	0.750194	0.752015	0.753846	0.738368	0.750333	0.762693	0.756849	0.755808
0.730821	0.754313	0.719388	0.70638	0.673347	0.707727	0.680276	0.667619	0.655425	0.698384	0.678369	0.696605	0.709596	0.723081	0.722244	0.72141	0.720577	0.719746	0.746651	0.734869	0.723452	0.712385	0.713153	0.71282	0.712486	0.758038	0.760166	0.723038	0.726207	0.729404	0.732629	0.735882	0.739165	0.757892	0.777593	0.776249	0.774909	0.773575	0.772244	0.770918	0.769597	0.76828	0.766968	0.76566	0.788482	0.762073	0.768011	0.760751	0.753626	0.738053
	1.0229	1.01107	0.999509	0.988212	0.977168	0.966368	0.959883	0.953484	0.94717	0.988265	0.94888	0.938644	0.978797	0.994255	1.01916	0.992971	0.974171	0.956069	0.97427	0.973632	0.979805	0.960172	0.941837	0.935495	0.90204	0.929472	0.882121	0.877276	0.90624	0.93875	0.94679	0.970174	0.96486	0.936796	0.924259	0.953171	0.951994	0.965961	0.984875	1.00868	1.02689	1.00778	1.03624	1.05526	1.04167	1.04285	1.02762	1.04128	1.00434
	5.04337	4.93633	4.83373	4.90567	5.47199	5.32862	4.79675	4.18389	4.26073	4.19031	3.52909	2.51232	2.41659	2.39895	2.0276	1.69568	1.81192	1.61188	1.35918	1.39709	1.32837	1.23414	1.1782	1.2801	1.2548	1.26989	1.22088	1.24185	1.05304	1.02776	1.16098	1.15181	1.14968	1.08406	1.19796	1.105	1.01052	1.22743	1.05632	1.24654	1.20939	1.18163	1.1327	1.34498	1.16967	1.08328	0.950476	1.02442	1.12292
	1.00019	0.982946	0.969122	1.01407	1.06338	0.967355	0.968967	0.970584	0.923872	0.951294	1.00969	0.951575	1.05906	1.03913	1.01112	1.07724	1.10422	1.13603	1.14357	1.13516	1.24422	1.20389	1.16609	1.11558	1.13755	1.08107	1.17011	1.16435	1.05521	1.11734	1.03836	0.974224	0.98645	1.10101	1.07118	1.081	1.091	1.07088	1.07717	1.00754	0.959649	0.973698	0.944051	0.983784	0.983597	1.04076	0.976489	0.992078	0.94878
	0.906921	0.890187	0.888878	0.887572	0.88273	0.884875	0.88703	0.890786	0.8896	0.909655	0.924509	0.896831	0.89783	0.902629	0.910346	0.918196	0.928745	0.899624	0.930342	0.946277	0.954098	0.959128	0.964211	0.958125	0.976606	0.995813	1.01543	0.989917	1.01813	1.03273	1.02541	1.01819	1.01972	1.02465	1.02963	1.0352	1.04082	1.0465	1.05225	1.05806	1.06393	1.03687	1.04562	1.05697	1.0697	1.0594	1.0542	1.04905	1.04394
	1.02222	1.01094	1.03694	1.02365	0.959279	0.987588	0.989694	0.94034	0.931506	0.942012	0.944393	0.947736	0.93429	0.982867	0.937243	0.895666	0.894373	0.893084	0.869084	0.935799	0.93869	0.941598	0.891648	0.884309	0.880898	0.868758	0.882897	0.887433	0.892628	0.888186	0.871175	0.860885	0.847042	0.89054	0.858681	0.852683	0.82316	0.852035	0.844262	0.843494	0.842729	0.85853	0.855585	0.840705	0.854408	0.866784	0.879524	0.881361	0.883207
	0.765942	0.75809	0.750397	0.761465	0.752253	0.755116	0.758001	0.760909	0.774875	0.782176	0.789617	0.7972	0.803933	0.804298	0.803915	0.79981	0.77767	0.757881	0.769101	0.75931	0.798072	0.772428	0.784026	0.78156	0.779109	0.776674	0.777583	0.772954	0.761885	0.77044	0.7782	0.786119	0.776751	0.767603	0.758669	0.792697	0.785202	0.777848	0.806511	0.82445	0.813929	0.803672	0.797795	0.786713	0.775934	0.765447	0.757492	0.749701	0.746957
	0.695269	0.696562	0.69786	0.699162	0.70047	0.683777	0.67211	0.676043	0.680022	0.684048	0.680166	0.686369	0.692687	0.699122	0.659527	0.693166	0.695336	0.69752	0.699718	0.693132	0.746738	0.73639	0.731665	0.727	0.712366	0.698311	0.684799	0.688752	0.694134	0.6996	0.705152	0.710794	0.716527	0.722353	0.728274	0.731322	0.734396	0.724812	0.822529	0.816373	0.810307	0.804332	0.798443	0.792641	0.781937	0.775938	0.77003	0.764211	0.772338
	0.687291	0.711498	0.737473	0.719094	0.690922	0.727687	0.744741	0.705327	0.710594	0.71594	0.703384	0.715189	0.727397	0.700464	0.714468	0.729044	0.744227	0.760056	0.776573	0.720149	0.711927	0.722488	0.733368	0.74458	0.756141	0.768066	0.762385	0.756787	0.751271	0.745834	0.72783	0.710675	0.69431	0.703607	0.713156	0.746162	0.74386	0.739172	0.734544	0.731712	0.728902	0.769682	0.748396	0.737081	0.772649	0.811824	0.797598	0.783863	0.752758
		1.23082	1.21946	1.20831	1.19737	1.79501	1.7009	1.75063	1.80337	1.76641	1.73094	1.76565	1.60589	1.59244	1.57921	1.54817	1.52169	1.54011	1.47954	1.65384	1.71093	1.77211	1.3979	1.58134	1.46516	1.42992	1.37841	1.35661	1.38603	1.39575	1.4056	1.37336	1.41657	1.47829	1.54563	1.24013	1.3752	1.51316	1.52039	1.38988	1.42523	1.50565	1.23088	1.42427	1.57896	1.13028	1.19386	1.13307	1.17946
		0.858384	0.860725	0.840161	0.820556	0.813773	0.807101	0.800537	0.794079	0.792812	0.791076	0.789348	0.787627	0.803679	0.803084	0.798804	0.794569	0.807412	0.814621	0.822041	0.829598	0.830311	0.831025	0.831824	0.844998	0.874574	0.846688	0.859736	0.872559	0.846257	0.846544	0.846831	0.847118	0.853103	0.784219	0.868009	0.833288	0.843272	0.847662	0.852099	0.856582	0.851273	0.86793	0.871292	0.877368	0.871246	0.895446	0.87833	0.87652
		0.688511	0.697753	0.685555	0.690939	0.696409	0.695595	0.711504	0.70276	0.702941	0.683864	0.681912	0.698342	0.668652	0.70605	0.698721	0.709218	0.697525	0.701019	0.704549	0.720133	0.710943	0.709153	0.697234	0.663842	0.6972	0.686798	0.698495	0.710597	0.694434	0.701669	0.709056	0.708096	0.707138	0.688402	0.733922	0.716942	0.714445	0.711964	0.722214	0.741465	0.758348	0.776017	0.772706	0.769423	0.770566	0.771712	0.794242	0.783966
		0.85064	0.859578	0.852138	0.844826	0.837639	0.830573	0.823625	0.816793	0.810073	0.806237	0.802438	0.798674	0.794945	0.791251	0.787592	0.783966	0.780373	0.831155	0.818729	0.83467	0.851245	0.868491	0.867876	0.86887	0.869866	0.914564	0.842958	0.856808	0.912492	0.873621	0.841404	0.822079	0.803621	0.825296	0.818703	0.811282	0.804928	0.784638	0.862857	0.845438	0.841664	0.837923	0.859001	0.83392	0.835285	0.820496	0.806222	0.792436
			1.11072	1.12854	1.14694	1.14175	1.19179	1.1952	1.21822	1.21454	1.18107	1.21215	1.20422	1.19661	1.20708	1.23943	1.21249	1.1975	1.1806	1.22271	1.17595	1.15267	1.16691	1.14268	1.0941	1.09862	1.10317	1.1255	1.08312	1.10612	1.06557	1.07322	1.0382	1.04807	1.05749	1.04762	0.980813	1.00898	1.03492	1.03674	1.00772	1.01733	1.02828	0.955719	0.939699	0.95819	0.987009	0.953367	0.964202
			0.893569	0.889951	0.885352	0.8808	0.883941	0.878683	0.89012	0.880035	0.878308	0.891783	0.894438	0.887665	0.880993	0.894301	0.909137	0.903616	0.899879	0.896173	0.896891	0.911269	0.903358	0.91157	0.905584	0.899677	0.909966	0.912813	0.914349	0.898842	0.921661	0.937042	0.936308	0.935574	0.92974	0.923977	0.958406	0.947435	0.936713	0.941599	0.930734	0.940867	0.935723	0.921821	0.920268	0.91728	0.906717	0.91995	0.913536
																														1.17754	1.17214	1.16678	1.1493	1.18924	1.18424	1.19238	1.2583	1.25879	1.25929	1.26	1.23731	1.23077	1.34805	1.23203	1.23297	1.52412	1.41872	1.32696	1.28493
							0.701732	0.710211	0.718897	0.719731	0.720568	0.721407	0.714992	0.723201	0.731601	0.75203	0.75342	0.784648	0.769049	0.770548	0.756454	0.76466	0.757419	0.756916	0.765616	0.752468	0.764252	0.753561	0.753283	0.755762	0.7575	0.724522	0.739691	0.758687	0.732755	0.730563	0.74622	0.745715	0.748672	0.760861	0.769612	0.73825	0.746632	0.744181	0.741745	0.739326	0.746736	0.738863	0.744538
																										0.813286	0.827066	0.782499	0.787656	0.782959	0.771621	0.763245	0.755049	0.736683	0.719189	0.770949	0.751699	0.733387	0.741274	0.761808	0.744744	0.74616	0.747583	0.744898	0.742232	0.739585	0.736957	0.747481	0.75831
																				3.09263	2.33564	1.87636	1.56803	1.34672	1.18016	1.05027	0.94613	0.860781	0.804678	0.790668	0.777137	0.764062	0.754469	0.67178	0.605427	0.659248	0.723572	0.736347	0.782451	0.757026	0.773126	0.784794	0.773541	0.725706	0.758561	0.731514	0.740014	0.748713	0.737962
													0.90834	0.893592	0.879315	0.865488	0.852088	0.858279	0.86456	0.870934	0.877402	0.883967	0.890632	0.897397	0.873164	0.850205	0.828422	0.909926	0.907353	0.924608	0.942532	0.961164	0.960238	0.959313	0.958391	0.891274	0.906653	0.913192	0.919826	0.926558	0.933389	0.940321	0.947357	0.954499	0.961749	0.937625	0.914682	0.892835	0.870598
																0.885376	0.887418	0.89799	0.886576	0.897544	0.915342	0.91345	0.908862	0.906393	0.903937	0.900411	0.908412	0.921888	0.936021	0.9345	0.932636	0.93078	0.928932	0.943179	0.947924	0.949393	0.955585	0.950356	0.945185	0.955018	0.982673	0.983118	0.959647	0.937271	1.00011	0.97124	0.97732	0.999611	0.93922
																																		0.734988	0.72603	0.776089	0.767667	0.775263	0.783011	0.78259	0.794698	0.779281	0.798663	0.756367	0.748873	0.741526	0.764464	0.777943	0.787068
																																														1.71479	1.63806	1.56789	1.50349
																										1.04761	1.10932	1.0801	1.05239	1.09884	1.0925	1.08623	1.08003	1.0739	1.06784	1.06184	1.09531	1.13095	1.17369	1.21978	1.26963	1.32374	1.1325	0.989542	0.976279	0.963367	0.950791	0.972827	0.995908
																																										0.827784	0.824661	0.853248	0.872747	0.819876	0.846943	0.823121	0.864582
																																																1.03391	1.01889
																																					0.990607	1.00022	1.01003	1.0051	1.00536	0.996711	0.963834	0.992458	1.01342	1.01247	1.01152	1.01543	1.01937
																																					1.04463	1.0488	1.05301	1.04265	1.05355	1.0629	1.07242	1.08211	1.09402	1.06556	1.05041	1.04489	1.04669
																																							1.12772	1.1403	1.11447	1.12413	1.13424	1.16806	1.19348	1.18786	1.2258	1.24531	1.28981
																																													1.40596	1.35193	1.30191	1.25545	1.21219
																																															0.877751	0.878224	0.878698
0.835848	0.837735	0.854356	0.845416	0.867161	0.858656	0.863115	0.860537	0.865428	0.85761	0.868809	0.872493	0.87834	0.860997	0.864687	0.877124	0.869776	0.868715	0.872036	0.870468	0.881672	0.874521	0.892064	0.894321	0.885147	0.880424	0.878474	0.861292	0.867541	0.867925	0.883549	0.865941	0.882985	0.880147	0.890146	0.843936	0.869561	0.876322	0.857171	0.864623	0.867259	0.849419	0.846877	0.838598	0.851074	0.841415	0.845032	0.833207	0.822377	0.821515
0.708076	0.688777	0.693218	0.67974	0.666777	0.674661	0.681758	0.689006	0.668449	0.664271	0.660144	0.663857	0.667612	0.67141	0.675251	0.679136	0.664641	0.678705	0.682765	0.679634	0.660979	0.6844	0.668814	0.664909	0.662685	0.677262	0.674298	0.677381	0.66492	0.687616	0.697234	0.681982	0.716646	0.697073	0.727049	0.723524	0.769314	0.781848	0.774681	0.783247	0.75126	0.784659	0.753768	0.750672	0.763448	0.753809	0.751241	0.723309	0.746167	0.744228
0.975263	0.94888	0.923887	0.900176	0.899151	0.898369	0.900759	0.884658	0.90429	0.884757	0.888897	0.885232	0.824758	0.931302	0.921706	0.924515	0.936288	0.946099	0.938849	0.934898	0.934394	0.938115	0.911825	0.90111	0.911079	0.903943	0.850815	0.859164	0.908481	0.918699	0.873026	0.933239	0.936082	0.873486	0.91051	0.894093	0.924494	0.964368	0.919376	0.932118	0.9858	0.956433	0.948399	0.952653	0.947617	0.991815	1.00786	0.990139	0.99213	0.947372
0.901659	0.915386	0.892899	0.888619	0.902087	0.896181	0.87246	0.842472	0.857696	0.836999	0.842846	0.82992	0.879024	0.871597	0.838499	0.778404	0.79398	0.789417	0.799447	0.794391	0.808177	0.799361	0.792702	0.788781	0.789194	0.783433	0.776008	0.790834	0.749975	0.764107	0.764487	0.766282	0.776925	0.770244	0.78967	0.748001	0.811825	0.785952	0.787847	0.779396	0.771124	0.764328	0.764258	0.773796	0.761131	0.7538	0.75998	0.775022	0.763244	0.750984
0.916744	0.902836	0.913091	0.881441	0.881785	0.864676	0.843526	0.877328	0.840658	0.85276	0.830811	0.824072	0.850506	0.852812	0.859831	0.865304	0.870847	0.878138	0.85742	0.868208	0.882672	0.895273	0.872832	0.905639	0.87066	0.885628	0.883572	0.881526	0.87949	0.901875	0.874049	0.87094	0.885727	0.911619	0.877725	0.886732	0.882157	0.884995	0.899322	0.917763	0.919691	0.921627	0.903284	0.909997	0.895834	0.86794	0.890435	0.881942	0.899552	0.911133
0.876533	0.879579	0.875086	0.871427	0.867798	0.8642	0.871172	0.862903	0.857283	0.851736	0.867643	0.884219	0.892377	0.900687	0.894248	0.910734	0.899606	0.925659	0.930065	0.923795	0.91154	0.926694	0.91487	0.913678	0.898976	0.929975	0.940088	0.950423	0.971743	0.985643	0.951962	0.955265	0.971944	0.967928	0.96724	0.966554	0.980324	0.9534	0.927915	0.952876	0.979218	0.982596	0.985998	0.980706	0.998159	0.986123	0.964238	0.951337	0.98116	0.981538
0.940232	0.914757	0.910514	0.891141	0.890325	0.915461	0.912037	0.91699	0.907827	0.931975	0.913923	0.907527	0.866462	0.875875	0.880353	0.867329	0.862906	0.832521	0.859414	0.854276	0.8492	0.888931	0.869038	0.874746	0.880529	0.88639	0.853946	0.850291	0.849896	0.849501	0.832155	0.830226	0.828306	0.810473	0.803648	0.766675	0.819247	0.801714	0.787976	0.768927	0.790513	0.785796	0.762522	0.748466	0.737228	0.726322	0.722705	0.732299	0.726071	0.725854
0.726692	0.711372	0.708063	0.704353	0.699897	0.700899	0.681798	0.693687	0.705998	0.703016	0.69598	0.699151	0.693922	0.682682	0.679219	0.697407	0.712601	0.723666	0.720351	0.721889	0.721767	0.702381	0.704264	0.682342	0.693385	0.691423	0.676912	0.68174	0.679472	0.683977	0.680269	0.676601	0.672973	0.678714	0.675435	0.64192	0.708713	0.700337	0.691597	0.709862	0.701525	0.70638	0.711302	0.706555	0.710049	0.718787	0.710598	0.711488	0.71238	0.698744
0.904448	0.918926	0.91553	0.919568	0.901165	0.893098	0.885666	0.871236	0.875565	0.866442	0.873319	0.840178	0.850942	0.851233	0.844801	0.856317	0.843234	0.844387	0.824303	0.825121	0.840419	0.833835	0.816445	0.848204	0.853774	0.843389	0.86778	0.86452	0.896485	0.919987	0.908492	0.900914	0.907871	0.918745	0.918539	0.938563	0.957743	0.976072	0.99715	1.00502	1.01103	1.02861	1.04922	1.02391	1.02404	1.01127	1.00347	1.01067	1.00295	1.01245
0.73949	0.734864	0.740879	0.734945	0.723467	0.711831	0.728535	0.716005	0.732326	0.735268	0.772006	0.728819	0.741062	0.713893	0.741355	0.749081	0.761629	0.743015	0.76633	0.763608	0.738429	0.740792	0.733568	0.739836	0.738519	0.718066	0.718445	0.748726	0.728278	0.753518	0.765574	0.718641	0.715614	0.711099	0.704122	0.66955	0.69485	0.722137	0.717179	0.714884	0.710733	0.714924	0.737392	0.776619	0.740775	0.75513	0.833026	0.789107	0.804646	0.856405
0.836427	0.840365	0.82615	0.823267	0.826593	0.814356	0.820705	0.846427	0.82638	0.856122	0.863975	0.863931	0.864441	0.835037	0.815298	0.842467	0.82975	0.82549	0.821274	0.818097	0.795764	0.786785	0.778006	0.785566	0.768864	0.776179	0.795866	0.807556	0.794173	0.79111	0.777409	0.791886	0.792939	0.791476	0.780191	0.753398	0.788312	0.770777	0.798172	0.815557	0.813424	0.811302	0.794599	0.832111	0.839702	0.847432	0.862186	0.821408	0.851811	0.853179
0.764848	0.778268	0.772091	0.769889	0.773814	0.76003	0.768254	0.775297	0.782946	0.764116	0.773538	0.773896	0.774654	0.776136	0.777625	0.779119	0.780618	0.77157	0.768112	0.764684	0.749976	0.735822	0.739749	0.743717	0.735462	0.727387	0.719488	0.711759	0.704193	0.696788	0.689536	0.682433	0.684812	0.691417	0.66908	0.596095	0.699344	0.66729	0.67007	0.672873	0.687196	0.694281	0.680753	0.702844	0.70041	0.696636	0.712455	0.702703	0.705942	0.683732
0.921411	0.923639	0.915177	0.900933	0.899402	0.89404	0.896765	0.88799	0.881327	0.879121	0.883754	0.873755	0.866382	0.86075	0.842415	0.841679	0.838813	0.827746	0.829987	0.812997	0.818049	0.811669	0.813666	0.801888	0.805263	0.807784	0.805	0.806947	0.805072	0.810618	0.827428	0.814287	0.816173	0.815929	0.809711	0.795476	0.824528	0.812762	0.801327	0.81144	0.808722	0.819352	0.804224	0.803161	0.783268	0.78391	0.784553	0.788111	0.778354	0.805173
0.839798	0.830134	0.828911	0.823509	0.816923	0.800685	0.813854	0.816203	0.822377	0.811419	0.816708	0.81325	0.829146	0.829082	0.828057	0.816927	0.819682	0.810595	0.832771	0.827903	0.834918	0.843688	0.843373	0.844176	0.845875	0.853725	0.845128	0.834876	0.824138	0.813672	0.822017	0.811581	0.838423	0.84086	0.843311	0.83787	0.876043	0.844226	0.814638	0.854199	0.857648	0.858743	0.872005	0.871509	0.873654	0.872508	0.859247	0.850337	0.853477	0.851424
0.978487	0.945106	0.966381	0.965091	0.981148	0.963863	0.956836	0.94991	0.948288	0.974011	0.943509	0.953915	0.972331	0.970498	1.0006	0.966963	0.939454	0.960254	0.956358	0.941129	0.939533	0.983313	0.957836	0.964082	0.962821	0.97597	0.978727	0.950895	0.983025	0.955085	0.978522	0.95509	0.94413	0.947824	0.936447	0.917782	0.938648	0.959846	0.909688	0.911576	0.922471	0.932028	0.923118	0.92512	0.902497	0.933068	0.911401	0.92695	0.920691	0.913014
		0.828036	0.852991	0.879498	0.907705	0.941662	0.95228	0.932561	0.913641	0.895474	0.884308	0.873416	0.877091	0.870001	0.86146	0.852501	0.849403	0.841336	0.852261	0.843054	0.852392	0.854834	0.864361	0.871388	0.862976	0.854547	0.865924	0.860186	0.860358	0.862141	0.834194	0.828924	0.829548	0.832304	0.807569	0.855348	0.848597	0.856614	0.862224	0.852635	0.850306	0.843415	0.842049	0.836602	0.843083	0.825468	0.809497	0.787134	0.769332
0.899201	0.867457	0.868779	0.868674	0.904503	0.89023	0.876402	0.862996	0.862836	0.86556	0.86978	0.860011	0.852497	0.85174	0.850984	0.824936	0.836173	0.833911	0.852255	0.847838	0.871395	0.870952	0.870509	0.844967	0.874087	0.867862	0.879115	0.890664	0.900161	0.906511	0.91484	0.92197	0.929212	0.935754	0.942389	0.933164	0.924118	0.908186	0.883115	0.889638	0.89626	0.90298	0.918059	0.933651	0.944576	0.924095	0.926938	0.939433	0.938931	0.925961
0.824355	0.797584	0.794718	0.802546	0.804469	0.812493	0.823326	0.825475	0.81944	0.805881	0.8132	0.809279	0.797032	0.800313	0.807905	0.824015	0.81678	0.80812	0.804851	0.812211	0.801086	0.829906	0.8117	0.831873	0.814709	0.837714	0.829671	0.824972	0.830736	0.828842	0.800771	0.783546	0.819438	0.80396	0.831012	0.810707	0.841326	0.819113	0.805134	0.798776	0.814193	0.821902	0.822287	0.822672	0.806619	0.813538	0.82103	0.827326	0.83824	0.827058
0.954871	0.947384	0.932743	0.939924	0.947217	0.948759	0.955595	0.963076	0.957759	0.961029	0.971071	0.972789	1.00077	0.98805	1.01121	0.984696	0.992978	0.990809	1.00918	0.99029	0.987417	0.989953	0.989936	0.983313	1.02027	1.0178	1.04659	0.973429	0.968572	0.983389	0.956461	0.937071	0.932586	0.935944	0.91941	0.916846	0.936551	0.949852	0.958975	0.947079	0.929521	0.920031	0.89903	0.901189	0.887924	0.880774	0.91735	0.957095	1.00044	1.01859
0.911911	0.920664	0.905907	0.900322	0.895699	0.897487	0.878525	0.889031	0.890567	0.892108	0.882576	0.898317	0.897222	0.884012	0.886528	0.894018	0.883071	0.88391	0.883149	0.87315	0.894459	0.892707	0.869397	0.882392	0.888025	0.889653	0.886753	0.887487	0.868233	0.868157	0.868081	0.872724	0.882371	0.856729	0.83921	0.822393	0.866077	0.844445	0.825694	0.891631	0.921091	0.946448	0.971093	0.955806	0.940994	0.917702	0.921002	0.924325	0.892183	0.903323
0.821267	0.800375	0.811938	0.78231	0.781483	0.783951	0.79214	0.783229	0.774516	0.770805	0.769882	0.760731	0.748162	0.770665	0.763663	0.763636	0.757905	0.764187	0.758588	0.753071	0.755607	0.757588	0.753414	0.753003	0.744544	0.736273	0.728183	0.741139	0.731168	0.738377	0.731321	0.733255	0.746875	0.735716	0.746134	0.727582	0.756798	0.739234	0.741812	0.759156	0.753642	0.748208	0.748516	0.748824	0.734015	0.733425	0.74819	0.719204	0.724854	0.732896
0.878249	0.882306	0.868678	0.87906	0.892691	0.894218	0.89633	0.900738	0.886712	0.878608	0.873809	0.872738	0.856318	0.87464	0.869849	0.851239	0.853739	0.844545	0.819334	0.815785	0.822747	0.808007	0.818661	0.818304	0.802451	0.80562	0.809405	0.799494	0.811102	0.823052	0.807421	0.786935	0.791941	0.785152	0.778479	0.725548	0.779695	0.770593	0.7617	0.76806	0.766774	0.770549	0.774362	0.778213	0.77133	0.815101	0.784955	0.787619	0.797093	0.806797
0.693211	0.697292	0.715788	0.686116	0.695907	0.705188	0.713272	0.679292	0.695499	0.656812	0.65856	0.661811	0.654506	0.647361	0.665767	0.68525	0.681257	0.69191	0.702771	0.678846	0.688725	0.714487	0.675958	0.715478	0.694352	0.67665	0.70324	0.700489	0.713324	0.728779	0.730861	0.747571	0.769381	0.792501	0.795809	0.763823	0.8376	0.830248	0.823024	0.830786	0.831041	0.85451	0.825896	0.866222	0.866556	0.875693	0.886703	0.900751	0.881708	0.894509
0.736427	0.729013	0.736059	0.737609	0.741607	0.750343	0.754533	0.771734	0.762907	0.755401	0.76875	0.783344	0.783488	0.803732	0.775343	0.783579	0.787649	0.800428	0.798077	0.797349	0.796304	0.787499	0.809308	0.787939	0.780844	0.780111	0.788494	0.796919	0.798162	0.786183	0.764735	0.772055	0.774886	0.787126	0.799758	0.759952	0.77802	0.796968	0.797879	0.798792	0.803084	0.800947	0.786823	0.797866	0.806317	0.813872	0.815504	0.814221	0.819588	0.798587
1.17988	1.19055	1.17268	1.21308	1.20034	1.20079	1.20575	1.21076	1.18925	1.16849	1.15397	1.1761	1.15763	1.17085	1.18674	1.17577	1.17917	1.20626	1.21413	1.32366	1.23499	1.2198	1.22492	1.22212	1.19257	1.17396	1.18086	1.20576	1.16854	1.19847	1.18138	1.16133	1.13021	1.13004	1.12986	1.12669	1.12544	1.16496	1.0588	1.11252	1.17198	1.13503	1.16703	1.20333	1.18151	1.19674	1.22402	1.15593	1.14469	1.19395
0.747177	0.742526	0.763608	0.737119	0.747225	0.761846	0.747179	0.784245	0.766511	0.771342	0.775878	0.774398	0.786665	0.800131	0.778971	0.796659	0.794512	0.792218	0.803604	0.801818	0.808665	0.776886	0.807632	0.804674	0.808925	0.803092	0.816556	0.771706	0.769461	0.780831	0.792543	0.765378	0.799147	0.797018	0.794899	0.792792	0.790696	0.788611	0.786537	0.787335	0.788134	0.803561	0.819603	0.845454	0.835165	0.849292	0.862784	0.876711	0.867407	0.887095
0.994351	1.00854	1.00445	1.2171	1.25683	1.19444	1.19044	1.20412	0.992656	1.14669	1.18659	1.10848	1.07512	1.21394	1.18131	1.41816	1.25724	1.25276	1.15094	1.17984	1.29484	1.15924	1.10869	1.1686	1.13481	1.15969	1.13611	1.21019	1.18574	1.20092	1.18161	1.10083	1.05889	1.04556	0.975548	0.966024	1.12391	0.95285	0.875783	0.855167	0.835499	0.917717	0.955931	0.88288	0.975084	0.93775	0.880533	0.869042	0.843127	0.837464
0.822468	0.836989	0.835949	0.835762	0.829404	0.821893	0.814002	0.80626	0.823567	0.826542	0.839685	0.839801	0.84213	0.854563	0.846809	0.866731	0.846482	0.847269	0.84144	0.835692	0.830278	0.825447	0.832359	0.839389	0.841483	0.826362	0.824443	0.82986	0.831695	0.828762	0.828777	0.826019	0.834708	0.843583	0.853091	0.819249	0.868159	0.840347	0.810317	0.849593	0.844214	0.840376	0.842952	0.83782	0.848752	0.840825	0.833045	0.825408	0.81791	0.811419
0.788774	0.798696	0.783678	0.794773	0.801791	0.800056	0.813395	0.83122	0.843651	0.877456	0.841467	0.862202	0.872538	0.829476	0.821416	0.820861	0.823846	0.811119	0.805846	0.803176	0.845791	0.796354	0.795275	0.78513	0.797238	0.797662	0.779634	0.767864	0.771528	0.763352	0.759753	0.763005	0.760109	0.75932	0.758533	0.738648	0.7897	0.784983	0.776661	0.777365	0.77158	0.791403	0.794269	0.805653	0.804149	0.793916	0.824833	0.829598	0.810841	0.836387
0.968321	1.05404	1.21282	1.27878	1.2193	1.01632	1.05617	1.09691	1.14092	1.10248	1.02577	1.02736	0.981724	1.01074	0.942927	0.935765	0.922026	0.908684	0.924133	0.931049	0.907145	0.917508	0.928111	0.909984	0.903165	0.900524	0.862614	0.89235	0.897769	0.875781	0.900784	0.9	0.898726	0.89563	0.892555	0.872425	0.9047	0.917774	0.931232	0.917446	0.912702	0.924461	0.929933	0.952144	0.965396	0.936087	0.969668	0.934568	0.932381	0.934614
1.05586	1.02793	1.00123	0.991995	0.953705	0.951626	0.957411	0.935587	0.944082	0.917331	0.896591	0.904328	0.923139	0.885354	0.892484	0.877028	0.889822	0.897343	0.890146	0.909944	0.915197	0.917645	0.909014	0.910884	0.903393	0.903274	0.90144	0.899614	0.898804	0.89002	0.893185	0.886416	0.883622	0.88312	0.888916	0.883131	0.876567	0.880801	0.89822	0.916341	0.918081	0.919826	0.921579	0.923338	0.896614	0.896956	0.868339	0.877404	0.886659	0.906767
0.820907	0.82659	0.804835	0.794255	0.796888	0.780745	0.77683	0.773806	0.748234	0.753531	0.758904	0.758397	0.787517	0.771897	0.81368	0.791883	0.771223	0.770211	0.802266	0.769844	0.807585	0.777961	0.770601	0.763378	0.756289	0.749331	0.755363	0.761492	0.767721	0.774053	0.75438	0.735681	0.717887	0.752303	0.718015	0.708578	0.722387	0.736746	0.744802	0.753036	0.761455	0.770063	0.778869	0.787878	0.747957	0.771049	0.77145	0.771852	0.772254	0.772656
0.829308	0.846025	0.86343	0.831041	0.849897	0.857031	0.911353	0.973027	0.886558	0.886016	0.87405	0.894153	0.921387	0.937751	0.98041	0.882976	0.895495	0.891084	0.90337	0.997411	0.911819	0.927607	0.943951	0.973617	0.98623	1.0107	0.902209	0.954318	0.950148	0.992983	0.939349	1.02475	0.926066	0.939846	1.00459	1.11878	1.03691	1.05371	1.08928	1.19725	1.14514	1.14489	1.21279	1.13912	1.13133	1.10314	1.10058	1.13035	1.16177	1.19498
0.825353	0.815845	0.816924	0.806791	0.810397	0.824221	0.804207	0.789592	0.78079	0.777018	0.771513	0.777804	0.784816	0.776932	0.796888	0.778234	0.789137	0.794087	0.786149	0.797974	0.786013	0.777686	0.780938	0.787356	0.777125	0.775278	0.781056	0.789598	0.789789	0.780285	0.755682	0.766541	0.76889	0.77027	0.786329	0.724449	0.81822	0.779308	0.773065	0.801794	0.799416	0.803043	0.786587	0.793846	0.797214	0.792252	0.790869	0.789492	0.782692	0.767888
0.805145	0.837312	0.835976	0.807232	0.822601	0.816903	0.810815	0.821099	0.831647	0.815459	0.829595	0.828909	0.801102	0.812944	0.813175	0.813406	0.826454	0.819688	0.812874	0.825004	0.825675	0.82361	0.814041	0.804873	0.815461	0.797625	0.811266	0.808223	0.795974	0.811351	0.809019	0.796988	0.806126	0.815476	0.813392	0.791646	0.795462	0.806123	0.808151	0.811839	0.791677	0.802552	0.807906	0.816666	0.823108	0.829653	0.836303	0.833401	0.83052	0.830011
1.4392	1.35608	1.24753	1.22645	1.31081	1.3558	1.36662	1.3176	1.33237	1.30874	1.40623	1.41127	1.38975	1.30936	1.39472	1.39564	1.34879	1.25734	1.25059	1.23797	1.20221	1.25627	1.18539	1.17245	1.27373	1.14348	1.20898	1.20688	1.43533	1.37156	1.34081	1.39656	1.45967	1.52876	1.60162	1.65117	1.59199	1.65931	1.68919	1.70618	1.64301	1.68355	1.68133	1.61771	1.55872	1.53381	1.53702	1.51374	1.45601	1.62665
0.857109	0.872158	0.882767	0.902084	0.912212	0.913145	0.907628	0.903906	0.897386	0.91815	0.91931	0.905784	0.886267	0.886137	0.886006	0.885607	0.885208	0.885096	0.884984	0.886578	0.886143	0.885708	0.885274	0.88484	0.88271	0.868605	0.854944	0.854259	0.852056	0.855362	0.856399	0.861924	0.878499	0.887076	0.877483	0.868094	0.892808	0.881926	0.871567	0.88321	0.895169	0.89553	0.895891	0.896253	0.89066	0.885137	0.879682	0.874294	0.870048	0.866263
1.10808	1.09856	1.13166	1.07482	1.12	1.14601	1.10486	1.07953	1.11579	1.1586	1.14238	1.10609	1.07204	1.16278	1.18975	1.16735	1.14486	1.12322	1.09112	1.1072	1.05324	1.09136	1.088	1.14486	1.12918	1.13037	1.18157	1.14603	1.11257	1.13507	1.10583	1.05199	1.02861	1.03528	1.05116	1.01627	1.04344	1.04116	1.03888	1.02103	1.06287	1.19169	1.1718	1.15256	1.1119	1.0948	1.0938	1.1239	1.07621	1.18597
0.625376	0.61927	0.621266	0.611718	0.617311	0.612748	0.620072	0.620991	0.616099	0.613577	0.612025	0.621332	0.633795	0.628355	0.641012	0.626405	0.630975	0.645035	0.64786	0.640223	0.639773	0.643071	0.65111	0.653008	0.647496	0.633433	0.628466	0.631772	0.627421	0.640815	0.636016	0.63797	0.64189	0.647173	0.642853	0.617908	0.669504	0.651683	0.650932	0.661605	0.660189	0.660729	0.658977	0.661744	0.659336	0.660115	0.662994	0.663992	0.667086	0.661685
0.995518	1.0248	1.04701	1.00924	1.02077	1.01786	0.972861	0.999087	0.985524	1.00903	0.981013	0.984917	0.952599	0.95701	0.977104	0.980119	0.973754	0.978299	0.959078	0.937589	0.917042	0.944248	0.899455	0.929675	0.920519	0.91403	0.896481	0.894051	0.901861	0.909606	0.917486	0.90431	0.910245	0.907117	0.916975	0.935825	0.946993	0.96047	0.974335	0.97591	0.968998	0.978567	0.983246	0.987971	0.992741	0.97443	0.985162	0.997599	0.980384	0.977346
0.684171	0.679591	0.743842	0.734529	0.736615	0.734386	0.741136	0.758397	0.752107	0.752805	0.760291	0.74748	0.769638	0.826829	0.817089	0.809718	0.802766	0.739584	0.797417	0.865064	0.817342	0.933042	1.0869	1.30152	1.62931	1.28747	1.38077	1.39104	1.38947	1.38791	1.34606	1.30666	1.19295	1.57168	1.2286	1.20479	1.18188	1.15983	1.13859	1.00037	1.21183	1.13951	1.43963	0.975376	0.773383	0.928898	1.1627	1.37048	1.47364	1.7603
0.821333	0.854245	0.824981	0.856122	0.826269	0.862688	0.814324	0.823686	0.82126	0.817078	0.819193	0.820588	0.821987	0.833471	0.822409	0.833859	0.835696	0.830696	0.835258	0.834854	0.823401	0.812258	0.828292	0.821821	0.820679	0.813559	0.806563	0.792324	0.809123	0.8065	0.803895	0.80281	0.801727	0.812343	0.801864	0.791653	0.809001	0.827126	0.846083	0.837328	0.834305	0.83707	0.844857	0.858845	0.859461	0.860337	0.861215	0.844395	0.85193	0.858925
0.873319	0.875177	0.885258	0.895307	0.888216	0.879368	0.870695	0.861514	0.86398	0.871781	0.84983	0.850226	0.854698	0.854482	0.85386	0.857895	0.860424	0.837216	0.852183	0.850876	0.84484	0.842723	0.847497	0.826615	0.836443	0.834325	0.827217	0.843264	0.840802	0.827216	0.849882	0.864397	0.863973	0.86355	0.841083	0.828043	0.852309	0.832624	0.813828	0.821898	0.838646	0.831213	0.844799	0.828962	0.813707	0.835887	0.805152	0.817823	0.830899	0.821417
0.853143	0.829265	0.869195	0.861202	0.853355	0.855798	0.835618	0.836895	0.843816	0.850852	0.833832	0.844672	0.819312	0.837867	0.84443	0.841983	0.827159	0.812848	0.83749	0.810424	0.815843	0.821335	0.848278	0.824604	0.829098	0.804287	0.812849	0.812941	0.782375	0.806491	0.824327	0.841163	0.809336	0.828165	0.841354	0.83232	0.8805	0.864053	0.871165	0.881718	0.872612	0.863692	0.856711	0.882307	0.864788	0.860047	0.857703	0.852618	0.862372	0.866497
0.875784	0.902668	0.87061	0.872806	0.875012	0.866519	0.874987	0.840834	0.854578	0.840322	0.852851	0.86576	0.861797	0.854916	0.825412	0.82157	0.830729	0.82404	0.818304	0.817945	0.793329	0.794988	0.783151	0.777662	0.772249	0.776652	0.777197	0.768163	0.772119	0.776115	0.780154	0.784234	0.788357	0.789586	0.774072	0.768787	0.760662	0.752707	0.766868	0.775222	0.783761	0.792489	0.801414	0.798661	0.795927	0.815817	0.810988	0.81592	0.817467	0.819021
1.59373	1.2014	1.14769	1.57039	2.48596	1.71943	1.05563	0.865639	0.846628	0.875585	0.881588	0.918639	0.805209	1.02597	0.868815	0.829887	0.936677	1.07203	1.07631	0.846822	0.847674	0.84716	1.04467	0.98085	1.05786	1.07897	1.10095	1.12384	1.14769	1.15969	1.01837	1.06514	1.09108	1.13513	0.974729	0.856341	0.965957	0.95418	0.942686	0.931465	1.01649	0.921397	0.924161	0.926943	0.929742	0.90491	0.968488	0.944771	0.926946	0.947984
1.21499	1.17405	1.13579	1.11494	1.0944	1.11622	1.13508	1.15459	1.13675	1.11945	1.1221	1.04501	1.06262	1.09968	1.15121	1.14035	1.14823	1.14936	1.13026	1.14566	1.12431	1.1063	1.09443	1.0531	1.03716	1.0217	1.01298	1.00977	1.00659	1.00342	0.997809	0.968512	0.989084	0.955908	0.948835	0.93309	0.93672	0.905119	0.899666	0.898177	0.900424	0.895413	0.890458	0.885557	0.88071	0.892221	0.876683	0.88214	0.879962	0.902657
0.794888	0.798043	0.798948	0.802303	0.800177	0.805952	0.806857	0.80676	0.791357	0.806172	0.795666	0.803718	0.792694	0.824363	0.803813	0.81467	0.810855	0.816161	0.79967	0.81219	0.807765	0.814145	0.820626	0.813897	0.81956	0.818288	0.806905	0.811842	0.80823	0.801605	0.795088	0.80123	0.807169	0.813196	0.801969	0.791048	0.839534	0.818004	0.817974	0.836045	0.824657	0.827066	0.835609	0.832665	0.82974	0.812768	0.822272	0.832001	0.823468	0.815108
0.862793	0.858101	0.842998	0.835728	0.835037	0.83148	0.836247	0.832537	0.836685	0.828895	0.8402	0.845316	0.827456	0.833015	0.836687	0.840391	0.831422	0.823096	0.817511	0.827973	0.825497	0.826454	0.8318	0.837216	0.835235	0.842644	0.850187	0.861477	0.863588	0.85156	0.839862	0.828481	0.823746	0.819064	0.814436	0.809859	0.805334	0.797442	0.789703	0.80313	0.817022	0.846694	0.838867	0.831182	0.840088	0.815558	0.821413	0.812111	0.802921	0.802705
1.00092	0.999494	1.02683	1.03317	1.03933	1.02669	1.04639	1.01633	0.987473	0.972377	0.951226	0.951553	0.959663	0.965191	0.950063	0.933788	0.932996	0.927615	0.922296	0.914105	0.906059	0.898152	0.895882	0.895818	0.913376	0.912051	0.910731	0.909241	0.907756	0.8852	0.884167	0.891741	0.899447	0.91176	0.905836	0.884434	0.912504	0.893613	0.875489	0.878191	0.880911	0.883647	0.877139	0.879073	0.884025	0.884459	0.884893	0.882816	0.876236	0.869753
0.890904	0.872003	0.839835	0.838578	0.837326	0.834673	0.844477	0.835267	0.833471	0.827715	0.834008	0.845443	0.8452	0.853007	0.835464	0.833043	0.830636	0.832354	0.815421	0.817725	0.8272	0.846122	0.838369	0.834107	0.829609	0.840956	0.821172	0.831757	0.818654	0.846057	0.836574	0.810131	0.841425	0.843496	0.846639	0.849805	0.849555	0.829749	0.823041	0.830178	0.837439	0.844829	0.852351	0.854192	0.848344	0.842575	0.849685	0.849624	0.849563	0.849502
0.830539	0.826461	0.830546	0.820997	0.825194	0.829434	0.833718	0.819681	0.804413	0.789703	0.793275	0.789072	0.799392	0.809986	0.797168	0.796147	0.795129	0.783311	0.786947	0.773598	0.770219	0.766869	0.76812	0.772459	0.776448	0.780478	0.776416	0.772396	0.768417	0.789955	0.769645	0.747882	0.759452	0.758015	0.756583	0.729565	0.774481	0.767503	0.760649	0.753916	0.758408	0.762953	0.767553	0.772209	0.770401	0.783814	0.797703	0.782878	0.782905	0.782931
1.06878	1.06765	1.07812	1.08881	1.0997	1.13544	1.12956	1.12374	1.09029	1.10893	1.1346	1.08605	1.08507	1.0841	1.08312	1.08215	1.08118	1.10687	1.13382	1.1512	1.18282	1.21622	1.16499	1.16281	1.09098	1.05117	1.04016	1.02938	1.00118	1.02843	1.05368	1.08019	1.06882	1.05768	1.1375	1.08767	1.19862	1.20296	1.20734	1.1677	1.2358	1.20445	1.16765	1.13303	1.14216	1.15144	1.24302	1.23758	1.23219	1.22684
0.983023	0.977865	0.967656	0.968196	0.964909	1.0027	0.979712	0.986072	1.00154	0.96811	0.959595	0.990899	0.952099	0.946256	0.959769	0.966371	0.965455	0.959086	0.957471	0.960061	0.967695	0.957571	0.943652	0.967398	0.978395	0.978694	0.999401	0.973026	0.989312	0.969693	0.972525	0.975374	0.97459	1.00066	0.984717	0.996712	1.009	0.993688	0.976232	0.973908	0.973846	0.973675	0.971591	0.969517	0.972217	0.971665	0.962345	0.965696	0.964737	0.954105
0.540277	0.536296	0.542532	0.541397	0.549526	0.539893	0.539448	0.550416	0.546842	0.555491	0.571891	0.553864	0.546215	0.561143	0.55232	0.557365	0.562503	0.56923	0.585457	0.602636	0.593196	0.578252	0.581526	0.584838	0.577677	0.570597	0.608699	0.586692	0.592209	0.606124	0.62071	0.602609	0.620969	0.624588	0.608792	0.593776	0.60965	0.626396	0.644088	0.662809	0.690604	0.698258	0.690217	0.682358	0.683165	0.683973	0.693861	0.65605	0.656978	0.67802
0.915926	0.863332	0.895492	0.889746	0.881464	0.871316	0.874783	0.890734	0.880883	0.874096	0.870127	0.890518	0.879775	0.878488	0.877205	0.889882	0.902932	0.90106	0.909274	0.880395	0.879914	0.85003	0.86598	0.859929	0.874031	0.862561	0.847878	0.857467	0.860678	0.8401	0.851257	0.841526	0.840554	0.839584	0.838617	0.841021	0.84344	0.809717	0.778587	0.790599	0.782944	0.775436	0.78153	0.78772	0.794009	0.797381	0.800781	0.80421	0.807669	0.811158
1.009	0.987798	0.94609	0.965895	0.989103	0.976633	0.917732	0.930262	0.928541	0.926826	0.925118	0.923417	0.925386	0.895991	0.928458	0.902351	0.898499	0.902072	0.905673	0.909303	0.906334	0.880562	0.9106	0.94276	0.878095	0.878769	0.879445	0.886506	0.888067	0.882046	0.876106	0.870245	0.884112	0.874271	0.866792	0.860542	0.899115	0.902748	0.881579	0.872762	0.895351	0.872471	0.887142	0.863616	0.846353	0.871913	0.864567	0.865762	0.883789	0.867556
1.03712	1.04863	1.04129	1.01863	1.01135	1.014	0.991682	1.02493	1.01099	1.00762	0.971496	0.940746	0.948056	0.96096	0.946983	0.957381	0.955258	0.951698	0.948163	0.944655	0.948591	0.929915	0.933953	0.924347	0.920992	0.917662	0.899416	0.926572	0.91255	0.924003	0.935002	0.920025	0.90552	0.918286	0.935973	0.939733	0.943524	0.938652	0.926524	0.947448	0.938966	0.946492	0.940891	0.935356	0.929886	0.924479	0.911934	0.88922	0.896394	0.903684
0.660448	0.661985	0.65662	0.639923	0.659392	0.656103	0.631415	0.632647	0.633884	0.645914	0.641207	0.666092	0.674111	0.659476	0.689413	0.69585	0.877649	0.850929	0.738561	0.722198	0.706544	0.720574	0.719373	0.722065	0.718746	0.712935	0.720102	0.736566	0.705885	0.715857	0.726115	0.736672	0.735165	0.733664	0.753159	0.767429	0.771864	0.757907	0.744446	0.785059	0.768884	0.765459	0.766801	0.768148	0.75592	0.753211	0.750523	0.767516	0.767576	0.773946
0.931146	0.952893	0.97568	0.975066	0.974452	0.91039	0.924954	0.93999	0.951085	0.962444	0.962959	0.963475	0.963992	0.964509	0.965027	0.960004	0.955032	0.950111	0.945241	0.972059	0.959974	0.948186	0.923455	0.943464	0.891458	0.934771	0.920662	0.906974	0.893686	0.902839	0.900374	0.897922	0.895483	0.881702	0.876309	0.876584	0.862926	0.849687	0.856732	0.866927	0.862475	0.86525	0.848906	0.833167	0.815705	0.79896	0.81609	0.826755	0.837703	0.848944
0.930432	0.90948	0.939222	0.918039	0.913626	0.918671	0.91744	0.899202	0.928666	0.913324	0.914669	0.919269	0.920073	0.886761	0.92854	0.936933	0.932735	0.905093	0.923398	0.920739	0.907045	0.928747	0.900655	0.912552	0.906128	0.901677	0.882309	0.923245	0.907015	0.906387	0.884809	0.886509	0.855194	0.900548	0.919179	0.881526	0.913918	0.918622	0.914447	0.910309	0.842473	0.854282	0.866427	0.878921	0.897513	0.872017	0.86056	0.878367	0.849894	0.82321
																																						1.19865	1.28042	1.30555	1.3317	1.30852	1.28614	1.26451	1.30454	1.34719	1.31002	1.27484	1.25288
0.536325	0.564678	0.593954	0.56991	0.608645	0.586985	0.609693	0.638451	0.629227	0.614448	0.621108	0.65608	0.665768	0.658585	0.63884	0.684867	0.669811	0.658981	0.684956	0.63962	0.552319	0.563574	0.588635	0.613845	0.602342	0.747504	0.600218	0.501419	0.430549	0.377231	0.335664	0.347458	0.346043	0.344639	0.343247	0.341866	0.358213	0.376202	0.396093	0.418205	0.442932	0.470767	0.522755	0.55005	0.615001	0.592948	0.612383	0.615758	0.611447	0.625549
0.71742	0.712181	0.71085	0.712601	0.695643	0.697455	0.699276	0.701107	0.674917	0.684146	0.710617	0.701127	0.70161	0.702095	0.698593	0.726415	0.688751	0.706592	0.715008	0.751403	0.72598	0.725062	0.713757	0.73993	0.73163	0.727836	0.727264	0.76161	0.725431	0.747767	0.721274	0.738282	0.733807	0.778173	0.828248	0.795487	0.788829	0.789098	0.789367	0.786742	0.778388	0.77422	0.800458	0.797169	0.794434	0.791718	0.785952	0.779344	0.772845	0.802861
0.738937	0.742995	0.74942	0.744794	0.767626	0.774698	0.769102	0.792208	0.806729	0.824921	0.793079	0.811302	0.80984	0.793487	0.831141	0.849137	0.833547	0.848512	0.849987	0.851468	0.886665	0.878919	0.89523	0.890467	0.872862	0.895457	0.898167	0.89085	0.893161	0.861541	0.888056	0.904049	0.909786	0.892416	0.897441	0.883074	0.875061	0.886723	0.898701	0.889377	0.889534	0.890077	0.883246	0.885779	0.893103	0.906157	0.887984	0.848163	0.890285	0.853594
0.723061	0.719404	0.720795	0.74192	0.715628	0.737681	0.728748	0.713485	0.708405	0.676107	0.694704	0.694158	0.689662	0.684218	0.686156	0.692353	0.68315	0.677242	0.64788	0.667187	0.673133	0.67134	0.672034	0.668093	0.673133	0.683983	0.681862	0.70289	0.680344	0.687964	0.694772	0.722382	0.744072	0.774965	0.777659	0.719018	0.757721	0.743139	0.705911	0.70417	0.688705	0.710933	0.726196	0.730489	0.734834	0.73923	0.743679	0.748182	0.75274	0.715445
0.749346	0.749207	0.762358	0.788844	0.803905	0.819551	0.835819	0.852746	0.870178	0.853345	0.87841	0.904992	0.902021	0.898361	0.907786	0.919358	0.912772	0.912526	0.961368	0.955211	0.949132	0.915444	0.93782	0.89138	0.886151	0.921454	0.929594	0.924817	0.92009	0.915411	0.891822	0.869418	0.88598	0.903185	0.915274	0.92769	0.940448	0.940865	0.941281	0.941698	0.944244	0.924185	0.931728	0.939926	0.94827	0.938479	0.928889	0.919492	0.906739	0.933825
0.948771	0.983543	0.982169	0.951725	0.957986	0.923391	0.877782	0.905231	0.901371	0.905926	0.924225	0.901172	0.937253	0.925857	0.914734	0.912344	0.909966	0.919685	0.885759	0.90169	0.918204	0.896761	0.899967	0.889131	0.878554	0.887059	0.89573	0.92722	0.921475	0.921141	0.920808	0.934783	0.981567	0.96875	1.01296	0.950519	0.980042	0.97083	0.96693	0.956979	0.997917	1.00184	1.0058	1.00979	1.02066	1.03177	1.01295	0.984074	0.979354	0.974679
0.820782	0.808054	0.77979	0.775787	0.77069	0.779715	0.78605	0.772652	0.787292	0.802498	0.796635	0.811217	0.806223	0.80129	0.800189	0.785367	0.771084	0.777366	0.783752	0.801808	0.810242	0.797772	0.816562	0.820078	0.823625	0.827202	0.829336	0.831481	0.833637	0.797509	0.789877	0.816814	0.846117	0.843844	0.841584	0.839335	0.837099	0.834874	0.847541	0.860599	0.874065	0.887959	0.892463	0.897012	0.901608	0.906251	0.910942	0.915683	0.920472	0.925312
0.657667	0.663278	0.686125	0.676468	0.667079	0.667312	0.656963	0.679465	0.670616	0.676857	0.683215	0.689693	0.689183	0.695432	0.701794	0.689467	0.693083	0.707993	0.707683	0.704588	0.696108	0.733677	0.704754	0.713628	0.722728	0.704479	0.765508	0.732845	0.733204	0.733563	0.739967	0.721127	0.703223	0.713276	0.70797	0.702743	0.697592	0.685422	0.698887	0.732928	0.741933	0.729293	0.717076	0.745191	0.730913	0.74727	0.729951	0.754571	0.758198	0.744745
																																0.453859	0.451954	0.450066	0.448193	0.446335	0.444493	0.442666	0.440854	0.450103	0.459748	0.469815	0.480334	0.491334	0.50285	0.514918	0.529911	0.538315	0.546989
	0.971458	0.955117	0.933844	0.890134	0.911422	0.894257	0.882141	0.889311	0.881322	0.873516	0.898948	0.916912	0.917344	0.906397	0.875258	0.911069	0.88686	0.910226	0.900554	0.883596	0.880157	0.90104	0.879017	0.868843	0.84573	0.835633	0.848424	0.862491	0.877033	0.911999	0.910411	0.904182	0.906457	0.906312	0.906167	0.932879	0.94876	0.940462	0.946562	0.921921	0.937862	0.954365	0.959754	0.942377	0.951357	0.959098	0.971074	0.983237	0.962707
	0.656196	0.674436	0.693719	0.714137	0.722812	0.718703	0.740645	0.727928	0.715641	0.734653	0.754704	0.720531	0.75422	0.768385	0.737627	0.747765	0.755498	0.75442	0.724552	0.751526	0.745542	0.739653	0.736118	0.735107	0.737705	0.734634	0.740307	0.746069	0.735884	0.734336	0.725956	0.720177	0.710684	0.709492	0.694124	0.753298	0.730289	0.756841	0.767614	0.76254	0.760882	0.759231	0.757588	0.755951	0.760146	0.771027	0.767621	0.764244	0.760898
	0.842419	0.810996	0.828251	0.785263	0.837122	0.844167	0.827746	0.806765	0.843436	0.821052	0.840294	0.86046	0.881617	0.903842	0.857115	0.875335	0.894346	0.914201	0.934958	0.929314	0.946022	0.935836	0.925866	0.960928	0.943605	0.926896	0.950045	0.964966	0.961387	0.957835	0.954309	0.964662	0.958887	0.95318	0.958671	0.929644	0.951053	0.861694	0.902304	0.960773	1.04605	1.02609	1.00687	0.988351	1.03064	1.02755	1.02448	1.02143	1.0184
	0.881968	0.899276	0.917278	0.936014	0.936648	0.937281	0.896406	0.949284	1.00879	1.07626	1.18813	1.20314	1.27556	1.36825	1.23376	1.25324	1.2355	1.43885	1.4083	1.48866	1.43287	1.39077	1.39523	1.44042	1.31623	1.395	1.40714	1.41949	1.37311	1.32967	1.28889	1.26482	1.24163	1.21803	1.14045	1.0646	1.07183	1.05334	1.02192	0.992326	1.01544	1.03966	1.05605	1.07297	0.996079	1.0053	1.0147	1.01859	1.02682
	0.978711	0.975195	0.960475	0.962832	0.96865	0.962027	0.980906	0.959911	0.965727	0.955518	0.95752	0.954649	0.957862	0.955952	0.954049	0.961437	0.948644	0.967005	0.95646	0.935609	0.937393	0.937783	0.917777	0.923444	0.931474	0.929843	0.943937	0.950341	0.931921	0.939528	0.940733	0.974743	0.928541	0.914781	0.934578	0.938219	0.943534	0.935284	0.958364	0.948698	0.966194	0.967818	0.984729	1.00224	1.01938	0.979881	1.03685	0.975779	0.970968
	1.05299	1.05613	1.05929	1.05737	1.01276	1.01365	1.01454	1.01542	1.01997	1.02456	1.02919	1.03386	1.0153	1.03054	1.03246	1.03438	1.01262	1.02546	1.02874	1.03204	1.01038	1.03158	1.04595	1.06072	1.02254	1.04531	1.04967	1.05406	1.0585	1.06831	1.06994	1.07158	1.06245	1.05347	1.05137	1.04928	1.0472	1.04716	1.04249	1.04235	1.04221	1.04625	1.05033	1.05581	1.03093	1.03314	1.03536	1.03758	1.03982
		1.11223	1.18458	1.32746	1.73856	1.80161	1.86941	1.94251	2.0246	2.41373	2.20163	2.29246	2.44025	2.60841	2.34624	2.53498	2.07963	1.76296	1.52998	1.35139	2.26251	2.03573	1.85027	1.69578	1.67097	1.64687	1.62346	2.02186	2.46801	2.19531	1.97687	1.79798	2.05376	2.10216	2.56438	1.69453	2.00355	1.95573	1.91013	2.26242	1.97336	1.7498	1.85345	1.70045	1.4953	1.62966	1.26688	1.58198	1.43411
		1.13759	1.12981	1.12496	1.12719	1.12942	1.12906	1.1287	1.12834	1.15247	1.15758	1.16274	1.16451	1.16628	1.12953	1.12814	1.09692	1.0901	1.08337	1.07302	1.05974	1.08718	1.08151	1.07591	1.04351	1.04661	1.04421	1.05573	1.04267	1.0536	1.05521	1.05682	1.08198	1.07091	1.09962	1.05215	1.06016	1.06829	1.07655	1.08901	1.09182	1.09465	1.08405	1.08274	1.08018	1.07326	1.06864	1.06406	1.05952
																																																0.805774	0.830097
																																							0.85289	0.852993	0.853095	0.859791	0.882333	0.88126	0.885546	0.889873	0.883994	0.881705	0.886655
												0.907619	0.918395	0.929431	0.960087	0.958273	0.956466	0.954665	0.952871	0.951084	0.949303	0.947529	0.942699	0.935235	0.926053	0.917051	0.908221	0.912837	0.939991	0.947844	0.964024	0.971181	0.913581	0.8949	0.876936	0.901915	0.888007	0.891803	0.854807	0.873358	0.892732	0.890942	0.898925	0.907052	0.885346	0.904998	0.947436	0.933772	0.920497
						1.1811	1.2133	1.15114	1.10799	1.06795	1.03071	0.99598	1.30603	1.16293	1.01825	1.01451	1.09713	0.86015	0.896675	0.852626	0.853352	0.917025	0.909038	0.876432	0.91442	0.921335	0.928355	1.00315	1.06479	0.867304	0.948195	0.93797	1.0076	0.940339	0.881496	0.973962	0.938894	0.906264	0.958411	0.927361	0.898259	0.944328	0.960809	0.931731	0.989117	1.02699	1.04781	0.978898	0.998763
							1.01671	1.02352	1.03042	1.03742	1.04452	1.05171	1.0524	1.07807	1.08864	1.07494	1.01634	1.03625	1.04404	1.05327	1.04941	1.02449	1.03926	1.04902	1.08381	1.10115	1.10458	1.1105	1.11982	1.1226	1.13042	1.13668	1.11382	1.10953	1.13659	1.09481	1.10628	1.08954	1.08188	1.07521	1.0697	1.08542	1.08476	1.09258	1.08235	1.06156	1.07879	1.09653	1.10705
								0.69683	0.703389	0.702953	0.699627	0.696332	0.699294	0.702281	0.705293	0.708332	0.69576	0.712426	0.714952	0.712304	0.719838	0.733092	0.746844	0.761121	0.768317	0.77565	0.783124	0.795512	0.793637	0.79177	0.789912	0.788063	0.788448	0.788834	0.785233	0.781665	0.778129	0.79262	0.79589	0.793745	0.791612	0.785998	0.780463	0.775006	0.782418	0.78262	0.782822	0.778515	0.773619
																		1.10566	0.96557	1.1595	1.45091	1.08156	1.03105	1.1457	1.13097	1.11661	1.15892	1.20456	1.13373	1.32107	1.27811	1.19501	1.1728	1.19227	1.33503	1.39202	1.3676	1.47415	1.2802	1.48349	1.467	1.49658	1.43291	1.2865	1.29794	1.23045	1.23385	1.04661	1.08042
																							1.60185	1.47069	1.48169	1.49285	1.50419	1.5157	1.52738	1.53925	1.5513	1.97587	1.97001	2.09205	2.2302	2.3879	2.56959	3.25914	3.53979	3.72565	3.93955	3.18414	3.23624	3.34262	3.45624	3.57786	3.20565	2.92482	2.53905
																														0.896192	0.881328	0.866948	0.85303	0.839552	0.826493	0.833044	0.82501	0.842661	0.861084	0.844717	0.86649	0.825176	0.835257	0.845589	0.834635	0.840852	0.847163	0.852962	0.858842
																																									1.06797	1.05827	1.04875	1.06904	1.06236	1.07531	1.11023	1.09651	1.10051
																																														1.03109	0.995147	1.02605	1.05894
Tx dose: 50ng INS
0.759861	0.75855	0.741632	0.748646	0.743653	0.747108	0.747734	0.728731	0.735789	0.740378	0.744482	0.742368	0.764941	0.734388	0.741533	0.734143	0.7371	0.731601	0.738223	0.72904	0.730552	0.722989	0.73048	0.71898	0.731658	0.727592	0.721968	0.726089	0.694611	0.712579	0.720542	0.71654	0.709601	0.712303	0.711981	0.632026	0.739903	0.695966	0.688893	0.685885	0.705889	0.744332	0.762005	0.752056	0.758295	0.76228	0.764361	0.766452	0.759069	0.760832
1.01059	0.959006	0.965045	0.96713	0.970872	0.933145	0.94919	0.931494	0.94097	0.937478	0.919913	0.930878	0.900057	0.893698	0.90009	0.886919	0.910937	0.88823	0.887218	0.869785	0.89656	0.874935	0.84837	0.859457	0.869194	0.846591	0.837393	0.834255	0.826793	0.849019	0.833419	0.854747	0.877197	0.870863	0.940034	0.802796	0.8911	0.880797	0.90135	0.905938	0.911068	0.958119	0.954186	0.938734	0.951332	0.950419	0.988395	0.96762	0.978692	0.99002
0.734774	0.748138	0.752139	0.757748	0.768131	0.737531	0.758948	0.785598	0.803604	0.784437	0.793039	0.781882	0.791963	0.768234	0.784664	0.783039	0.781421	0.785808	0.776948	0.789625	0.79775	0.811239	0.825191	0.836493	0.854334	0.857774	0.87258	0.8569	0.835689	0.873108	0.882921	0.894427	0.870723	0.878456	0.89529	0.883789	0.917596	0.916182	0.931793	0.945716	0.962408	0.956504	0.937297	0.964588	0.95946	0.959346	0.944296	0.93989	0.955766	0.999256
0.809831	0.802768	0.797238	0.763696	0.779349	0.78926	0.787591	0.793017	0.805805	0.821364	0.810344	0.809283	0.819488	0.82277	0.805775	0.824076	0.808111	0.864278	0.8285	0.81768	0.813325	0.832287	0.820019	0.829739	0.844541	0.869547	0.876418	0.855016	0.867127	0.869819	0.876006	0.863232	0.852608	0.842105	0.818068	0.794438	0.829284	0.814751	0.816973	0.819207	0.857176	0.887289	0.885018	0.905451	0.900033	0.899696	0.928296	0.95181	0.929434	0.922478
0.941497	0.947231	0.957172	0.982568	0.981439	0.975814	0.989013	0.994619	1.00029	0.997703	0.99133	1.00532	1.00448	0.98517	0.964735	0.964603	0.964471	0.9514	0.943383	0.930162	0.919239	0.896654	0.896147	0.883704	0.871602	0.852978	0.840142	0.838395	0.813475	0.814172	0.819304	0.8172	0.812507	0.816865	0.806805	0.795232	0.825961	0.819118	0.812389	0.805769	0.829847	0.85607	0.862192	0.868403	0.868191	0.852583	0.826922	0.832778	0.81892	0.829561
0.905653	0.88244	0.896004	0.881254	0.887954	0.884505	0.881083	0.875702	0.877479	0.859012	0.904707	0.864142	0.878656	0.876242	0.863086	0.888748	0.867377	0.88885	0.879714	0.855761	0.863576	0.853212	0.854159	0.846713	0.843315	0.841091	0.843643	0.846105	0.825761	0.83564	0.844427	0.853402	0.851593	0.832038	0.86307	0.849265	0.870241	0.856139	0.861599	0.867313	0.892468	0.924009	0.904239	0.901024	0.909195	0.911233	0.887414	0.88161	0.879324	0.878831
0.655012	0.642829	0.654177	0.645492	0.639131	0.637957	0.651385	0.65717	0.658949	0.678373	0.666183	0.6595	0.653813	0.660264	0.658502	0.65165	0.636064	0.653076	0.644962	0.636474	0.65895	0.639421	0.660684	0.649927	0.651316	0.652224	0.648561	0.639323	0.611674	0.620749	0.616997	0.642098	0.668484	0.699993	0.68645	0.634242	0.738209	0.651709	0.672888	0.665816	0.680704	0.673387	0.693385	0.69773	0.702128	0.722504	0.72196	0.740545	0.75325	0.799497
0.793168	0.794501	0.790871	0.795016	0.784707	0.778647	0.781005	0.772962	0.783382	0.766733	0.791807	0.770344	0.807593	0.811315	0.792656	0.799762	0.792865	0.797239	0.80166	0.812266	0.774929	0.7777	0.820297	0.813497	0.821974	0.830629	0.820975	0.819326	0.823578	0.832453	0.841522	0.832633	0.841123	0.867642	0.859336	0.820938	0.886585	0.872495	0.892725	0.92937	0.937634	0.942062	0.972768	0.944369	0.964731	0.97477	0.985021	0.969606	0.976077	0.953418
0.830516	0.810865	0.818733	0.804538	0.809757	0.801665	0.799695	0.832597	0.793723	0.811945	0.790383	0.788949	0.796096	0.805246	0.805237	0.805228	0.804092	0.806861	0.812643	0.808139	0.828629	0.822259	0.816965	0.828498	0.837856	0.830501	0.822447	0.822184	0.836519	0.851362	0.85946	0.866876	0.862352	0.86574	0.864455	0.844104	0.857626	0.848564	0.865191	0.863722	0.883391	0.909265	0.919675	0.925834	0.920772	0.914453	0.909631	0.891953	0.895766	0.888648
0.666396	0.666031	0.667703	0.672063	0.670203	0.674354	0.678653	0.668983	0.662086	0.669335	0.683112	0.690517	0.694269	0.6927	0.684704	0.693057	0.687239	0.693805	0.680188	0.694034	0.702619	0.692414	0.703544	0.70099	0.700968	0.694733	0.701921	0.70505	0.700601	0.70198	0.70634	0.702651	0.712046	0.722104	0.71769	0.71321	0.722902	0.712166	0.721263	0.717896	0.715729	0.725987	0.727687	0.714839	0.725435	0.722717	0.723341	0.748321	0.748674	0.766596
0.855616	0.861232	0.85849	0.854184	0.846917	0.850235	0.847037	0.838652	0.849342	0.848922	0.845315	0.835773	0.850706	0.856229	0.848915	0.857	0.852093	0.830521	0.842906	0.837997	0.83658	0.835167	0.833759	0.831974	0.839194	0.845955	0.87086	0.866021	0.852992	0.853761	0.855265	0.869458	0.886157	0.906858	0.928549	0.923261	0.922745	0.916313	0.926683	0.894473	0.914695	0.972685	0.992986	1.0209	1.06068	1.05544	1.11092	1.09752	1.05023	1.05728
0.762132	0.762173	0.762215	0.783675	0.769636	0.75998	0.750563	0.776316	0.796191	0.786192	0.783911	0.804754	0.773026	0.779885	0.786866	0.801515	0.797904	0.800584	0.812943	0.796839	0.806056	0.764486	0.748121	0.797837	0.807724	0.816179	0.80193	0.784768	0.815328	0.856574	0.7682	0.787144	0.77891	0.772326	0.78893	0.738862	0.815729	0.791182	0.816005	0.809746	0.803583	0.842595	0.885269	0.879319	0.911565	0.932044	0.940619	0.915766	0.889516	0.906623
0.892177	0.839832	0.88235	0.926974	0.832025	0.897153	0.884555	0.857605	0.858247	0.855109	0.817089	0.806219	0.78356	0.818264	0.801353	0.784829	0.807543	0.813675	0.803893	0.812236	0.77034	0.782517	0.805033	0.787902	0.767726	0.76797	0.7717	0.798088	0.881548	0.864148	0.875559	0.864692	0.878298	0.868095	0.871409	0.958266	0.935733	0.876282	0.871438	0.915703	1.00976	1.05386	1.01511	1.00362	0.998842	1.02815	1.01355	1.02537	1.047	0.999992
0.763031	0.752002	0.758456	0.742934	0.75805	0.74732	0.773231	0.760896	0.780141	0.78839	0.786369	0.778723	0.797479	0.7889	0.788051	0.792718	0.780738	0.776493	0.78279	0.772432	0.765168	0.755509	0.754606	0.77795	0.796265	0.794643	0.791415	0.787208	0.803851	0.810716	0.827306	0.826387	0.851625	0.876412	0.864673	0.843402	0.882252	0.8588	0.882095	0.883379	0.916268	0.944171	0.938743	0.94147	0.942473	0.958971	0.956254	0.958628	0.972275	0.992957
0.727719	0.728608	0.71725	0.712748	0.698378	0.69759	0.696413	0.691051	0.688003	0.699869	0.711709	0.69483	0.701707	0.698734	0.695154	0.693141	0.712365	0.706226	0.698283	0.715331	0.737881	0.7073	0.720619	0.714408	0.708719	0.718984	0.724114	0.714621	0.737123	0.734283	0.731465	0.712895	0.725085	0.716989	0.710862	0.606282	0.77635	0.714246	0.719229	0.740429	0.755816	0.787075	0.827931	0.846985	0.842517	0.84	0.824585	0.835744	0.847209	0.858993
0.757217	0.800429	0.81247	0.81361	0.814753	1.00485	1.31066	1.88403	1.58683	1.72617	1.46918	1.62731	1.91255	1.42031	1.5359	1.46533	1.41324	1.46451	1.54845	1.61152	1.55036	1.49689	1.54295	1.50355	1.49912	1.49471	1.4289	1.50981	1.81949	1.819	1.63032	1.63514	1.63161	1.70557	1.65445	1.78336	1.30885	1.52653	1.32414	1.53816	1.51731	1.39575	1.41181	1.67696	1.43944	1.40155	1.34956	1.23807	1.29135	1.66283
0.664723	0.645822	0.63597	0.628272	0.620206	0.61647	0.612779	0.610835	0.612023	0.617688	0.613896	0.619198	0.616887	0.614881	0.613018	0.618445	0.604631	0.617115	0.618686	0.604893	0.608321	0.620586	0.62313	0.638247	0.624468	0.628559	0.624691	0.623615	0.626961	0.630343	0.628432	0.625825	0.623851	0.628023	0.653318	0.651486	0.688163	0.647457	0.639671	0.628075	0.643744	0.667237	0.68601	0.692415	0.698715	0.70135	0.696909	0.684002	0.687919	0.689789
1.02053	0.99767	0.985892	0.969443	0.981206	0.976723	0.97228	0.967877	0.924343	0.938962	0.943141	0.949083	0.962779	0.964304	0.943515	0.948043	0.947784	0.966073	0.966894	0.981211	0.9815	0.969819	0.974567	0.958564	0.962499	0.960002	0.969284	0.961535	0.991044	1.02382	1.0192	1.05169	1.03256	0.995534	0.961073	0.962615	0.953309	0.967087	1.00766	1.06526	1.09863	1.13416	1.13976	1.15189	1.17562	1.18795	1.20292	1.21727	1.20001	1.1919
0.801288	0.836297	0.795772	0.804444	0.794971	0.798853	0.808726	0.838164	0.805001	0.807301	0.832856	0.823008	0.781323	0.799747	0.794553	0.795622	0.839362	0.833187	0.803688	0.79405	0.852584	0.823651	0.94115	1.07632	0.833754	0.846786	0.830907	0.841751	0.83322	0.839479	0.85286	0.832782	0.813628	0.817508	0.810868	0.752898	0.834647	0.766805	0.807198	0.828613	0.897023	0.924716	0.954174	0.983414	0.983661	0.946651	0.907147	0.934045	0.962587	0.929618
0.841932	0.855893	0.870393	0.847605	0.851255	0.842148	0.84177	0.841392	0.829825	0.833354	0.871141	0.890322	0.85123	0.85796	0.869015	0.855259	0.849885	0.849443	0.888582	0.865533	0.834963	0.831226	0.844756	0.851122	0.829566	0.81973	0.81088	0.811844	0.818945	0.826172	0.835611	0.869384	0.884894	0.900847	0.965847	0.947766	0.99114	1.01847	0.994843	1.00065	1.0168	1.00013	1.00604	0.997263	1.00587	1.00339	1.00092	1.01273	1.00743	1.02162
0.648753	0.638008	0.642552	0.62399	0.634199	0.622486	0.643379	0.62669	0.632308	0.6184	0.628962	0.644404	0.642612	0.641143	0.647902	0.651928	0.646771	0.63321	0.618184	0.623844	0.631069	0.626919	0.624843	0.632784	0.620699	0.616951	0.622566	0.636794	0.660729	0.679128	0.690531	0.67457	0.671811	0.657304	0.655124	0.558657	0.686104	0.688868	0.691654	0.706117	0.740978	0.739925	0.762264	0.759081	0.775677	0.793014	0.792052	0.789337	0.799264	0.787676
0.801995	0.802606	0.801751	0.808373	0.783998	0.791523	0.776372	0.779961	0.793692	0.793833	0.806295	0.817464	0.798658	0.827408	0.817528	0.831057	0.837607	0.835539	0.839756	0.838529	0.829567	0.842527	0.833554	0.826618	0.803494	0.796478	0.789584	0.800432	0.796742	0.789697	0.826315	0.821714	0.820026	0.825067	0.820939	0.783783	0.868319	0.833711	0.832562	0.824815	0.830903	0.856365	0.865713	0.897665	0.92479	0.931397	0.971498	0.967865	0.973565	1.01229
0.884637	0.877628	0.896359	0.864607	0.887062	0.859188	0.852904	0.840834	0.864085	0.867063	0.820127	0.818565	0.808048	0.833203	0.818459	0.814634	0.811131	0.823556	0.825437	0.828081	0.830742	0.835402	0.898282	0.854994	0.831673	0.833516	0.899753	0.832035	0.828402	0.896909	0.983488	0.929131	0.801711	0.786882	0.84101	0.836889	0.890214	0.965837	1.02812	1.08916	1.14641	1.15668	1.17982	1.26017	1.21698	1.18987	1.2269	1.25986	1.24719	1.24186
0.645063	0.653947	0.670223	0.663371	0.672344	0.650715	0.620238	0.627036	0.614326	0.618553	0.627262	0.599433	0.608383	0.606882	0.609764	0.610521	0.612694	0.597356	0.600456	0.620073	0.623908	0.620651	0.626203	0.638747	0.643542	0.632992	0.627015	0.623627	0.633549	0.632198	0.642907	0.644047	0.657176	0.641232	0.655038	0.619639	0.703751	0.683782	0.691097	0.679368	0.690661	0.713766	0.722233	0.722712	0.732802	0.734836	0.755451	0.73421	0.730571	0.753807
0.963373	0.977749	0.963186	0.958906	0.968438	0.936414	0.942944	0.932013	0.934191	0.940858	0.93965	0.938445	0.925718	0.918955	0.924705	0.901947	0.896439	0.908101	0.899848	0.918411	0.904104	0.917525	0.9189	0.916005	0.913128	0.928178	0.926463	0.9145	0.929879	0.937098	0.953756	1.00727	0.996137	0.952464	0.921517	0.896067	0.905035	0.910836	0.928669	0.913942	0.962085	1.01909	1.0134	1.03254	1.06866	1.071	1.07854	1.08618	1.10797	1.12013
0.864451	0.865503	0.886978	0.897543	0.897323	0.907919	0.897465	0.903135	0.901354	0.91302	0.899998	0.887343	0.880049	0.896422	0.881126	0.881502	0.887701	0.878379	0.869251	0.905057	0.892042	0.88579	0.874928	0.896936	0.902148	0.89087	0.90356	0.914332	0.908516	0.91486	0.932327	0.929401	0.931533	0.941267	0.948213	0.900343	0.960866	0.975119	0.974201	0.998079	1.01651	1.02349	1.03058	1.03317	1.02675	1.04572	1.02243	1.02005	1.01769	1.0277
0.804515	0.787899	0.771956	0.7744	0.784356	0.782315	0.795138	0.795021	0.782396	0.788033	0.803492	0.789878	0.789424	0.782081	0.791356	0.800854	0.774986	0.777378	0.774288	0.759489	0.785088	0.771479	0.77815	0.782943	0.775006	0.781062	0.779521	0.796842	0.796454	0.812831	0.85476	0.881215	0.860863	0.8148	0.814504	0.807491	0.877734	0.867642	0.896293	0.926901	0.970137	0.992277	1.01179	1.02584	1.04514	1.01948	1.01588	1.00146	0.99554	0.992384
1.05831	0.982239	0.916374	1.26049	2.01844	1.7489	1.24854	1.67996	1.34727	2.13792	1.56592	1.50373	2.62521	1.87865	2.88656	2.44393	2.54479	2.30824	2.46252	2.58148	2.36384	2.38481	2.25279	2.19355	2.77947	2.01978	2.25567	3.14287	3.60858	2.65928	2.67182	2.68447	2.80823	2.94396	3.8899	5.95063	2.83073	2.87012	4.01417	3.73496	4.44771	4.95225	5.0995	5.25578	5.36779	5.80382	5.84654	5.62045	5.83019	5.61351
0.635301	0.625029	0.620646	0.616831	0.608821	0.612644	0.601677	0.593367	0.633622	0.61679	0.606039	0.616336	0.62619	0.621166	0.632381	0.65153	0.632247	0.641903	0.653366	0.655833	0.648869	0.639198	0.651718	0.653815	0.658056	0.696348	0.74091	0.815085	0.798205	0.904977	0.991929	1.02487	1.01283	1.0483	1.0239	0.973487	0.963932	1.05589	1.04748	1.09466	1.09229	0.993864	0.958685	0.909562	0.887863	0.890827	0.882489	0.87866	0.889304	0.900209
0.857703	0.866957	0.827984	0.83017	0.825234	0.841592	0.858612	0.857584	0.86603	0.847036	0.865733	0.841668	0.8388	0.837994	0.842525	0.848746	0.831236	0.861808	0.838604	0.895394	0.907483	0.869634	0.88015	0.906801	0.919199	0.922885	0.926919	0.939939	0.930889	0.915868	0.931727	0.947936	0.963411	0.992964	0.991969	1.0515	1.00731	1.00716	1.02431	1.01766	1.04638	1.05237	1.04604	1.02927	1.04937	1.07129	1.09719	1.11963	1.12243	1.09564
0.781429	0.751479	0.771999	0.734895	0.754354	0.747802	0.673839	0.710134	0.679769	0.663965	0.664826	0.684071	0.677914	0.693838	0.656408	0.670286	0.658798	0.69782	0.68803	0.66332	0.666429	0.672927	0.679552	0.68631	0.693204	0.700237	0.688288	0.691982	0.703206	0.710443	0.717832	0.725375	0.755254	0.771917	0.783637	0.74355	0.808617	0.773493	0.787512	0.799874	0.809749	0.809531	0.799476	0.748184	0.78376	0.786294	0.798741	0.811588	0.791037	0.803363
0.814883	0.83992	0.831485	0.958518	1.02338	1.04306	1.05874	1.07202	1.0472	1.03804	1.02976	1.0147	0.980383	0.962573	0.928483	0.8878	0.871195	0.881722	0.876027	0.856032	0.860987	0.840394	0.864257	0.848335	0.836803	0.835949	0.848801	0.851511	0.869778	0.87724	0.884181	0.876952	0.884389	0.886155	0.894082	0.843595	0.891184	0.880108	0.885939	0.913747	0.959577	0.976883	1.01434	1.01742	1.01007	1.0156	0.991974	0.998624	1.00273	1.02124
																																				1.607	1.65892	1.71432	1.77354	1.837	1.8771	1.91651	1.91289	1.96058	1.96466	1.95502	1.91026	1.91933	1.92849
0.881387	0.901675	0.88775	0.876703	0.866141	0.888193	0.881112	0.878663	0.869191	0.889773	0.904885	0.902939	0.906932	0.904236	0.91173	0.919138	0.919453	0.907837	0.930816	0.924957	0.8989	0.924105	0.982066	0.971595	0.966392	0.961681	0.978087	0.970291	0.985936	0.974487	0.998844	1.01516	1.0051	1.02361	1.04811	1.08277	1.04038	1.07135	1.05937	1.07965	1.1072	1.14419	1.12739	1.10829	1.07497	1.06252	1.0578	1.05943	1.05694	1.07667
0.825573	0.816077	0.810405	0.811861	0.806786	0.804246	0.794951	0.794619	0.794621	0.801911	0.789503	0.792673	0.790703	0.795579	0.790834	0.783052	0.77436	0.778694	0.776114	0.780404	0.775302	0.764986	0.763117	0.760468	0.761872	0.757214	0.757458	0.752554	0.744415	0.748947	0.742824	0.759322	0.750298	0.758188	0.750105	0.737572	0.762341	0.754081	0.764813	0.756878	0.782354	0.772213	0.764323	0.780602	0.770375	0.773471	0.772024	0.776749	0.785696	0.767967
0.876957	0.899834	0.896943	0.900172	0.898123	0.900943	0.914074	0.907968	0.901295	0.895873	0.887206	0.887295	0.889122	0.875927	0.871351	0.870769	0.870632	0.842904	0.849839	0.856289	0.845131	0.843409	0.855647	0.85475	0.853854	0.83778	0.850749	0.872494	0.884488	0.862224	0.89288	0.889233	0.887924	0.886619	0.903826	0.887159	0.909557	0.904833	0.900159	0.912235	0.934167	0.97343	0.96524	0.957981	0.972747	0.986583	0.990102	0.99872	0.994151	0.990831
0.605429	0.616428	0.600925	0.637288	0.626868	0.623974	0.625762	0.624861	0.638605	0.633605	0.635359	0.647423	0.644854	0.641742	0.638853	0.64351	0.648607	0.649713	0.653215	0.648902	0.656542	0.665521	0.665134	0.661338	0.66387	0.66666	0.672571	0.674566	0.677164	0.689365	0.698333	0.714161	0.736602	0.734503	0.735694	0.699394	0.758379	0.729149	0.724791	0.754058	0.77114	0.772554	0.782961	0.764432	0.77214	0.777839	0.774867	0.771628	0.781224	0.790786
0.771181	0.769072	0.7694	0.780518	0.764796	0.777462	0.784276	0.775751	0.784098	0.777404	0.787421	0.76891	0.770184	0.775285	0.747321	0.748183	0.742951	0.732265	0.735784	0.742574	0.737066	0.750385	0.746888	0.758345	0.744036	0.745789	0.72348	0.729729	0.740444	0.751477	0.759114	0.752538	0.756857	0.777455	0.79023	0.749441	0.752401	0.698364	0.69844	0.673404	0.713504	0.758682	0.801205	0.813072	0.854601	0.875977	0.89845	0.900118	0.886599	0.867722
0.967635	0.966944	0.960311	0.944834	0.952316	0.932172	0.902832	0.895452	0.917901	0.904284	0.911582	0.938999	0.972727	0.836413	0.860866	0.860908	0.932998	0.916732	0.901023	0.881738	0.895036	0.90874	0.882272	0.852341	0.834833	0.845568	0.86096	0.881693	0.944781	0.888561	0.898332	0.905871	0.983994	1.07686	0.976053	0.950206	0.925692	0.896965	0.898761	0.888773	0.973276	0.93738	0.971191	0.97492	1.03112	1.01766	1.00193	0.995326	0.998463	0.983838
0.898385	0.904528	1.1318	1.37777	0.925076	1.11203	1.1417	1.96498	1.45586	1.15627	1.0879	0.895977	1.03507	1.22528	1.50114	1.9373	1.27778	1.78128	1.34701	1.28448	0.919217	0.926862	1.17199	0.908672	0.928862	0.94997	0.91012	0.913557	0.931807	0.920223	0.908923	0.910183	0.928248	0.955093	0.936406	0.950445	1.03561	0.925368	0.969161	0.950951	1.30549	1.2324	0.935687	1.41695	1.8851	1.35099	1.05272	0.862337	0.860503	0.840449
1.35224	1.36121	1.25905	1.3957	1.26589	1.30027	1.17655	1.15323	1.13081	1.08958	1.19065	1.14689	1.16283	1.14128	1.1659	1.16099	1.15613	1.16905	1.16356	1.16044	1.13013	1.14902	1.11735	1.22807	1.14028	1.16833	1.16588	1.16344	1.16101	1.26579	1.15113	1.12458	1.15959	1.11761	1.17536	1.12693	1.08233	1.11462	1.1489	1.16676	1.24112	1.18381	1.2819	1.39771	1.35878	1.32195	1.30888	1.3006	1.39713	1.30408
0.951841	0.94607	0.927386	0.898611	0.884537	0.880352	0.8712	0.852257	0.853712	0.860951	0.871855	0.891213	0.950074	0.954435	0.980272	0.995673	0.961518	0.993199	0.991873	0.996189	0.995955	0.997237	0.98583	0.965705	0.937835	0.976708	0.973614	0.949648	0.964414	0.961344	0.956932	0.982196	0.991685	0.97934	0.989023	0.977638	0.970288	0.95248	0.983998	1.00147	1.00141	1.00742	0.99858	1.00744	0.996375	1.00065	1.00346	0.991669	0.988159	0.97943
0.683697	0.666385	0.674071	0.681935	0.671949	0.689097	0.704199	0.709824	0.71315	0.687424	0.694098	0.679948	0.687795	0.696101	0.69312	0.690164	0.691589	0.693019	0.696507	0.690225	0.697738	0.69965	0.697009	0.694387	0.693588	0.690011	0.68647	0.691112	0.695816	0.700585	0.71877	0.732947	0.737126	0.743549	0.746473	0.738848	0.771637	0.757386	0.761942	0.766552	0.784317	0.787638	0.790987	0.80197	0.800568	0.79917	0.817743	0.811959	0.814332	0.81672
0.790317	0.819504	0.816624	0.79449	0.788831	0.783252	0.788038	0.791372	0.785433	0.803414	0.799767	0.791496	0.789255	0.801911	0.7991	0.800042	0.822436	0.806678	0.807806	0.803482	0.799205	0.798482	0.797342	0.796206	0.801891	0.805181	0.808498	0.819392	0.830664	0.829091	0.837316	0.830395	0.843823	0.807244	0.833124	0.742388	0.837004	0.802938	0.807279	0.811668	0.829472	0.850317	0.866926	0.863678	0.860455	0.838092	0.833375	0.836077	0.839115	0.842176
0.798996	0.799822	0.786334	0.798009	0.787358	0.796555	0.807214	0.802275	0.801697	0.815614	0.825358	0.821492	0.840631	0.841353	0.849881	0.840182	0.839501	0.826388	0.835086	0.831582	0.828819	0.826539	0.825209	0.823882	0.810003	0.832602	0.826845	0.821166	0.814803	0.808537	0.818817	0.818513	0.818208	0.810544	0.812756	0.851015	0.893053	0.865769	0.865646	0.871868	0.878798	0.896044	0.91355	0.918055	0.922605	0.932806	0.977604	0.980276	0.982962	0.99246
0.566513	0.579694	0.580426	0.5812	0.577006	0.572872	0.571506	0.55816	0.567455	0.585149	0.564305	0.589119	0.598609	0.60367	0.598528	0.582785	0.610097	0.616045	0.612471	0.614031	0.614333	0.620431	0.597258	0.617201	0.636783	0.623935	0.616212	0.614946	0.616641	0.618345	0.620059	0.663763	0.680881	0.667382	0.672466	0.577488	0.681414	0.638304	0.651316	0.646838	0.699925	0.726379	0.702733	0.720041	0.743394	0.756217	0.765283	0.784229	0.765631	0.747896
0.636432	0.622125	0.632763	0.627953	0.623217	0.62695	0.643644	0.646878	0.642556	0.644886	0.647232	0.669283	0.646787	0.635328	0.640547	0.62033	0.636778	0.654122	0.664166	0.627597	0.594844	0.645473	0.646122	0.616022	0.627081	0.619276	0.639336	0.630785	0.626032	0.611957	0.604213	0.607724	0.602158	0.612471	0.603574	0.587665	0.602831	0.605844	0.626757	0.614162	0.565692	0.584699	0.579948	0.536398	0.554847	0.562838	0.583438	0.574897	0.606971	0.620412
2.23478	2.01287	1.92039	1.73041	1.66123	1.93252	1.74066	1.93653	1.92534	1.87136	1.82031	1.66303	1.71272	1.6199	1.6873	1.61833	1.85269	1.56479	1.60846	1.5339	1.46594	1.63093	1.72971	1.4542	1.585	1.43285	1.4077	1.3994	1.38129	1.41845	1.42246	1.26939	1.35849	1.46412	1.26872	1.3958	1.24922	1.26429	1.30194	1.2433	1.24168	1.24007	1.23173	1.28927	1.35246	1.21133	1.19078	1.20812	1.17667	1.25182
0.578764	0.581312	0.577282	0.574306	0.572559	0.559343	0.581078	0.565657	0.59092	0.581553	0.598817	0.614904	0.605207	0.59747	0.611273	0.615746	0.618025	0.631894	0.599139	0.611407	0.601614	0.602136	0.606613	0.614654	0.630862	0.604924	0.614103	0.609741	0.640011	0.707437	0.670711	0.665538	0.6623	0.662682	0.662116	0.650287	0.662234	0.674627	0.687494	0.670491	0.678369	0.681566	0.696359	0.69217	0.708801	0.707957	0.707116	0.711777	0.710267	0.716551
0.66632	0.669168	0.64239	0.63665	0.61708	0.673157	0.628772	0.648979	0.682012	0.678022	0.711581	0.666329	0.724896	0.707643	0.723677	0.710609	0.780067	0.746631	0.701851	0.725948	0.762131	0.77896	0.789459	0.758623	0.74326	0.77199	0.738202	0.806628	0.766741	0.803616	0.880775	0.835419	0.823176	0.857645	0.856199	0.762992	0.774789	0.750368	0.794797	0.813289	0.876792	0.867657	0.864452	0.925981	1.00732	0.947321	0.925478	0.904619	0.909426	0.932725
0.714564	0.709832	0.710356	0.698392	0.696012	0.688374	0.682574	0.680563	0.68606	0.680688	0.684335	0.685672	0.67388	0.67512	0.675308	0.664336	0.676864	0.668532	0.674425	0.669177	0.675746	0.676392	0.675683	0.676354	0.677027	0.677701	0.680271	0.691083	0.705431	0.708774	0.712148	0.742473	0.711362	0.7314	0.714689	0.70129	0.730542	0.696039	0.683053	0.692139	0.70147	0.716482	0.706847	0.697469	0.702979	0.708577	0.700739	0.693073	0.696979	0.700929
0.861725	0.920076	1.00235	1.03196	1.07245	1.15534	1.14101	1.01416	0.955437	0.949315	0.898223	0.879227	0.83503	0.823113	0.798015	0.788316	0.778926	0.76173	0.756654	0.766731	0.756628	0.740112	0.751669	0.734485	0.734391	0.736178	0.737974	0.76012	0.752199	0.779118	0.791451	0.798386	0.820387	0.843635	0.84686	0.838142	0.896014	0.881643	0.921443	0.888026	0.947834	0.945083	0.959822	0.976285	0.993323	1.01662	1.02705	1.03331	1.04525	1.07982
1.04854	1.05841	1.03945	1.05321	1.01637	1.01741	0.955443	0.914264	0.876854	0.862333	0.867441	0.877142	0.868138	0.87107	0.858329	0.851204	0.871777	0.858415	0.870835	0.853495	0.859628	0.871386	0.852276	0.873711	0.896253	0.874404	0.87608	0.877762	0.879557	0.887111	0.903777	0.9241	0.959492	0.953659	0.942249	0.922574	0.947808	0.946805	0.950496	0.954217	0.960821	0.95105	0.938815	0.964073	0.971164	0.978361	0.971993	0.975509	0.984753	1.01605
0.63599	0.618146	0.60543	0.609504	0.62697	0.639024	0.630395	0.632204	0.640502	0.639244	0.633519	0.642661	0.650168	0.629527	0.650674	0.647305	0.663725	0.656746	0.674841	0.667483	0.707496	0.689039	0.692457	0.707181	0.711792	0.728662	0.724271	0.736975	0.80077	0.861905	0.805394	0.826203	1.02122	1.00175	0.963796	0.94945	0.963046	0.88575	1.075	1.06354	0.955877	1.06654	1.12895	1.17425	1.19232	1.11584	1.04021	0.98769	0.940221	0.916597
0.899796	0.89409	0.892955	0.851496	0.894257	0.88133	0.922263	0.924072	0.907916	0.891416	0.92876	0.932438	0.974371	0.933639	0.909638	0.944414	0.936918	0.943203	0.960119	0.929028	0.896348	0.925413	0.882494	0.960544	0.957028	1.00013	0.965904	0.950989	1.01375	1.04046	1.04356	0.97124	1.07013	0.976985	1.05757	0.915062	1.0075	1.01836	0.986734	0.95701	0.978495	0.963616	1.02563	1.0432	1.08162	1.08118	1.14406	1.08957	1.11017	1.13791
0.748812	0.754339	0.744261	0.7502	0.753547	0.73616	0.734143	0.731111	0.722869	0.718353	0.719153	0.709383	0.702139	0.708798	0.69042	0.681029	0.683391	0.685769	0.672137	0.677153	0.672847	0.670166	0.661065	0.658699	0.658937	0.67423	0.668239	0.6707	0.664807	0.653721	0.670165	0.672845	0.681291	0.680389	0.677241	0.652771	0.713377	0.689741	0.677913	0.687223	0.712314	0.71445	0.711362	0.696664	0.715303	0.717502	0.748845	0.74574	0.747881	0.747745
0.617151	0.635727	0.608031	0.625411	0.627055	0.63485	0.628548	0.645208	0.664748	0.688085	0.678684	0.656007	0.663033	0.658688	0.6544	0.67761	0.668592	0.656503	0.671964	0.681772	0.689051	0.700818	0.675309	0.696705	0.69998	0.687394	0.710871	0.711937	0.677637	0.697876	0.672621	0.728319	0.71678	0.741454	0.75666	0.724908	0.754093	0.749012	0.741079	0.750744	0.751713	0.772256	0.764283	0.784557	0.743502	0.774765	0.79978	0.812292	0.779252	0.802964
0.65816	0.608956	0.639408	0.673066	0.681699	0.673306	0.665117	0.643499	0.626572	0.610513	0.595256	0.615209	0.617433	0.620002	0.622592	0.623876	0.625165	0.641221	0.640013	0.63881	0.637612	0.629485	0.615522	0.618401	0.615834	0.613287	0.610762	0.626422	0.635772	0.664285	0.676855	0.674155	0.675793	0.677438	0.689987	0.660951	0.71567	0.71	0.702855	0.699494	0.702467	0.701313	0.692537	0.68141	0.701168	0.70935	0.71939	0.724282	0.72924	0.702633
0.913164	0.890222	0.906975	0.905378	0.945207	0.929997	0.930247	0.87228	0.892442	0.891396	0.860577	0.847836	0.89019	0.834725	0.84282	0.88345	0.848533	0.877293	0.871764	0.83692	0.843465	0.846817	0.828188	0.82347	0.8296	0.809472	0.827737	0.805257	0.839191	0.856457	0.830041	0.835959	0.841963	0.847942	0.846777	0.834061	0.844213	0.839284	0.851576	0.853923	0.85717	0.870589	0.889817	0.887167	0.864044	0.834912	0.812556	0.803668	0.79139	0.779481
0.632211	0.583563	0.632882	0.63794	0.668698	0.686886	0.668687	0.676967	0.672712	0.648085	0.656291	0.653776	0.675149	0.650535	0.61683	0.638137	0.639993	0.641859	0.667097	0.647154	0.628227	0.627617	0.617989	0.618342	0.586713	0.6015	0.614142	0.653955	0.632074	0.659346	0.689076	0.701174	0.713704	0.72669	0.740158	0.711994	0.770664	0.777096	0.783637	0.747145	0.721349	0.719928	0.718513	0.717103	0.715699	0.7143	0.739809	0.759448	0.759916	0.77115
0.875905	0.858345	0.86284	0.841787	0.836436	0.831151	0.818419	0.810396	0.811666	0.81294	0.835142	0.828011	0.847483	0.855957	0.851774	0.849632	0.846388	0.84971	0.853057	0.862268	0.87168	0.873714	0.846136	0.848321	0.83325	0.840971	0.819105	0.798347	0.795133	0.791945	0.788767	0.785614	0.792058	0.798609	0.781939	0.785879	0.795016	0.804368	0.830943	0.829945	0.828949	0.827956	0.849576	0.870713	0.903867	0.897858	0.891825	0.889888	0.897564	0.901309
0.694411	0.693489	0.68347	0.690654	0.699022	0.688263	0.688761	0.685539	0.689957	0.699438	0.685497	0.67729	0.683578	0.677203	0.683342	0.685129	0.677201	0.680745	0.66321	0.678117	0.68074	0.685063	0.678692	0.690236	0.687668	0.685119	0.677055	0.669894	0.676501	0.684374	0.693761	0.698033	0.702357	0.719747	0.720174	0.643341	0.759266	0.702952	0.694048	0.684698	0.710573	0.73848	0.764553	0.779629	0.757799	0.744369	0.739137	0.718345	0.72113	0.745489
0.641936	0.643605	0.638019	0.644833	0.641797	0.631515	0.634593	0.626019	0.636551	0.634267	0.642577	0.634792	0.629547	0.635526	0.633901	0.62508	0.610492	0.626143	0.62667	0.619633	0.61478	0.616908	0.618169	0.614445	0.6038	0.59639	0.620374	0.616252	0.623868	0.624148	0.63829	0.661101	0.674803	0.660099	0.673003	0.692689	0.713563	0.686239	0.699347	0.697383	0.716469	0.731854	0.727868	0.733422	0.73192	0.744666	0.738701	0.741476	0.73858	0.741482
0.765381	0.748493	0.737939	0.751061	0.744849	0.735859	0.727084	0.718516	0.719945	0.726188	0.68901	0.697921	0.667823	0.67321	0.659309	0.643037	0.632835	0.622953	0.619912	0.596755	0.596699	0.593585	0.59891	0.607569	0.582924	0.589614	0.612814	0.614489	0.594204	0.638334	0.63213	0.620891	0.626981	0.617467	0.620696	0.53563	0.593193	0.66462	0.629431	0.656856	0.700905	0.740901	0.7348	0.725752	0.716924	0.682065	0.700917	0.705353	0.70704	0.719181
[truncated: 503 more rows]
[truncated: 167 more columns]

## Sheet: TFEB_TR 1xgg 200ng Ins
TFEB_TR; cells culture with 1xGluc/Glut 200ng Ins, stimulated at time point 38; sampling time: 5 min; data are cells-by-time
Tx dose: 0x eaa
[truncated: 922 more rows]
[truncated: 167 more columns]

## Sheet: TFEB_3xSA_TR 1xgg 200ng Ins
TFEB_3xSA_TR; cells culture with 1xGluc/Glut 200ng Ins, stimulated at time point 38; sampling time: 5 min; data are cells-by-time
Tx dose: 0x eaa
[truncated: 923 more rows]
[truncated: 167 more columns]

## Sheet: TFEB_TR 1xgg 0ng Ins
TFEB_TR; cells culture with 1xGluc/Glut 0ng Ins, stimulated at time point 38; sampling time: 5 min; data are cells-by-time
[truncated: 1,142 more rows]
[truncated: 167 more columns]

[truncated: 3 more sheets: TFEB_3xSA_TR 1xgg 0ng Ins, TFEB_TR 1xgg 0xaa, TFEB_3xSA_TR 1xgg 0xaa]
