# Supplementary material for: Continuous sensing of nutrients and growth factors by the mTORC1-TFEB axis
Source: eLife. 2023 Sep 12;12:e74903. doi: 10.7554/eLife.74903 (PMC10547473; doi:10.7554/eLife.74903)
Supplement: Figure 4—source data 1. [file elife-74903-fig4-data1.xlsx]

## Sheet: condition 01
Treatment Spike															Glucose 17 mM + Glutamine 2.500000e-01 mM																									Insulin 10000 ng/ml
Cell	Signal	Treatment Group	0 minute	6 minute	12 minute	18 minute	24 minute	30 minute	36 minute	42 minute	48 minute	54 minute	60 minute	66 minute	72 minute	78 minute	84 minute	90 minute	96 minute	102 minute	108 minute	114 minute	120 minute	126 minute	132 minute	138 minute	144 minute	150 minute	156 minute	162 minute	168 minute	174 minute	180 minute	186 minute	192 minute	198 minute	204 minute	210 minute	216 minute	222 minute	228 minute	234 minute	240 minute	246 minute	252 minute	258 minute	264 minute	270 minute	276 minute
Cell_0001	TFEB_TR	Glucose 17 mM + Glutamine 2.500000e-01 mM + Insulin 10000 ng/ml + EAA 1.000000e-01 X	1.05857	1.55357	2.16512	2.27309	2.17134	0.731202	1.7872	2.9302	1.2616	0.589175	1.71866	2.28532	2.48256	0.757313	0.752978	2.44048	1.64954	1.11963	1.25997	1.94435	1.47155	0.989307	1.41524	1.30666	1.3737	1.74694	1.53945	1.05933	1.15893	2.12609	2.17374	1.72511	1.64859	0.941598	1.67649	1.22216	0.759289	0.725728	1.11749	1.47539	1.29449	1.63998	0.934657	2.89069	1.39471	1.89773	1.14144
Cell_0001	FOXO_TR	Glucose 17 mM + Glutamine 2.500000e-01 mM + Insulin 10000 ng/ml + EAA 1.000000e-01 X	1.7745	2.09151	3.02243	3.36248	1.70877	1.83619	2.25252	3.5585	1.70103	1.49675	2.54528	2.23337	2.99736	1.1161	1.50492	2.92335	3.17006	2.26374	1.54821	1.45303	3.30844	2.58338	0.881036	1.9501	2.43048	2.53243	2.34915	0.925076	2.44099	2.41709	2.29471	2.56601	1.41552	1.67508	2.89496	2.5691	1.60796	1.08903	1.99005	1.904	2.56535	0.973761	1.84434	2.21107	2.55704	2.58109	1.20608
Cell_0001	AMPKARt2	Glucose 17 mM + Glutamine 2.500000e-01 mM + Insulin 10000 ng/ml + EAA 1.000000e-01 X	0.598658	0.607007	0.629606	0.583028	0.433983	0.29912	0.526057	0.562817	0.471309	0.59922	0.631008	0.439612	0.604812	0.642682	0.575064	0.511966	0.687657	0.3943	0.476319	0.578357	0.59949	0.468657	0.652421	0.68504	0.712187	0.522933	0.470804	0.627989	0.626067	0.685311	0.511638	0.448454	0.623307	0.674758	0.527655	0.527317	0.514298	0.612985	0.61221	0.481786	0.581509	0.501032	0.597453	0.564022	0.686693	0.552673	0.624454
Cell_0002	TFEB_TR	Glucose 17 mM + Glutamine 2.500000e-01 mM + Insulin 10000 ng/ml + EAA 1.000000e-01 X	1.14841	1.54771	2.02917	2.53674	2.2855	0.739106	1.77007	3.22769	1.13862	0.607813	2.28825	2.43604	2.2668	1.29327	0.889736	2.54027	1.5249	1.18043	1.22604	1.9425	1.51261	1.01399	1.30185	1.20263	1.1925	1.96637	1.26901	1.00409	1.22463	2.36818	2.23994	1.71127	1.746	0.925022	1.6334	1.32379	0.815916	0.781754	1.08711	1.50171	1.09913	1.60061	0.913703	2.33079	1.27395	1.80079	1.16653
Cell_0002	FOXO_TR	Glucose 17 mM + Glutamine 2.500000e-01 mM + Insulin 10000 ng/ml + EAA 1.000000e-01 X	1.76862	2.05408	3.08512	3.90468	1.70691	1.87785	2.2132	3.57116	1.73247	1.51122	2.53508	2.18759	2.98485	1.12911	1.6013	2.8903	3.16037	2.35251	1.55317	1.53208	3.30713	2.59303	1.06958	1.83532	2.41565	2.47381	2.39904	0.946214	2.43861	2.36539	2.31163	2.63152	1.44848	1.66006	2.91433	2.46178	1.62035	1.15055	1.95038	1.89406	2.64767	0.935559	1.84298	2.02237	2.43295	2.47927	1.25849
Cell_0002	AMPKARt2	Glucose 17 mM + Glutamine 2.500000e-01 mM + Insulin 10000 ng/ml + EAA 1.000000e-01 X	0.601973	0.607015	0.639631	0.526535	0.433648	0.286026	0.546471	0.573005	0.449188	0.610492	0.605033	0.423996	0.603544	0.647669	0.553505	0.500781	0.689924	0.458776	0.504616	0.591138	0.59662	0.454251	0.67521	0.661802	0.712706	0.518336	0.489759	0.62523	0.629522	0.68896	0.518231	0.449419	0.621177	0.687178	0.519542	0.529422	0.479606	0.621008	0.617357	0.485613	0.595687	0.490158	0.576883	0.569475	0.680816	0.568705	0.618153
Cell_0003	TFEB_TR	Glucose 17 mM + Glutamine 2.500000e-01 mM + Insulin 10000 ng/ml + EAA 1.000000e-01 X	1.2161	1.51828	2.14272	2.75107	2.46393	0.758007	1.81122	3.79418	1.18616	0.647882	2.77863	2.40692	2.20915	1.33529	0.907324	2.48415	1.31505	1.04521	1.21323	1.2139	1.69702	1.01368	1.39928	1.09444	1.16315	1.67668	1.07068	1.24012	1.287	2.01784	2.11605	1.77206	1.70583	0.895349	1.48208	1.27594	0.819502	0.795025	1.08301	1.55135	1.02104	1.59945	0.935799	2.22657	1.29863	1.91124	1.1694
Cell_0003	FOXO_TR	Glucose 17 mM + Glutamine 2.500000e-01 mM + Insulin 10000 ng/ml + EAA 1.000000e-01 X	1.75275	2.04624	3.19624	3.8457	1.77282	1.97476	2.225	3.49062	1.68177	1.57802	2.57854	2.32382	3.08352	1.15335	1.66501	2.90271	2.9912	2.37086	1.55315	1.70263	3.19293	2.53679	1.58183	1.68347	2.36751	2.43611	2.58398	0.91743	2.25342	2.34154	2.24015	2.65878	1.44326	1.65516	2.99153	2.35345	1.59125	1.13143	2.00579	1.8906	2.7425	0.852858	1.84488	2.16779	2.43561	2.49172	1.29591
Cell_0003	AMPKARt2	Glucose 17 mM + Glutamine 2.500000e-01 mM + Insulin 10000 ng/ml + EAA 1.000000e-01 X	0.60093	0.600899	0.651605	0.501703	0.440058	0.283487	0.558624	0.576471	0.429694	0.599541	0.611577	0.4161	0.585353	0.66761	0.556869	0.504157	0.694693	0.486278	0.514731	0.693828	0.592074	0.424564	0.666519	0.657173	0.718902	0.528875	0.51263	0.62426	0.620236	0.681347	0.509319	0.465852	0.619647	0.691949	0.531429	0.548353	0.472778	0.636526	0.602282	0.478604	0.600398	0.499913	0.567975	0.573862	0.672496	0.564933	0.612594
Cell_0004	TFEB_TR	Glucose 17 mM + Glutamine 2.500000e-01 mM + Insulin 10000 ng/ml + EAA 1.000000e-01 X	1.12281	1.44055	2.23695	2.88061	2.57769	0.75051	1.7518	3.70339	1.32969	0.665548	2.22339	3.02727	2.30145	0.863012	0.890445	2.39425	1.41002	1.0632	1.23586	1.1166	1.91619	1.0147	1.68748	1.2326	1.36783	1.42792	1.47041	1.39599	1.085	1.29179	2.05073	1.95003	1.65305	0.960512	1.52308	1.32024	0.857778	0.807872	1.08676	1.61347	1.26719	1.65987	1.19687	2.72181	1.59922	1.87561	1.12562
Cell_0004	FOXO_TR	Glucose 17 mM + Glutamine 2.500000e-01 mM + Insulin 10000 ng/ml + EAA 1.000000e-01 X	1.7323	2.07564	3.17215	3.86476	1.75594	2.00147	2.15961	3.57206	1.62488	1.65837	2.56629	2.53307	3.02247	1.13631	1.62922	2.88405	2.8747	2.497	1.49912	1.63504	3.12211	2.70737	2.14226	1.5644	2.34998	2.45946	2.5128	0.875788	2.15116	2.30349	2.18913	2.71579	1.40035	1.64498	3.07096	2.29424	1.63592	1.12613	2.05686	1.97062	2.73749	1.16187	1.88726	2.2396	2.45675	2.48601	1.22405
Cell_0004	AMPKARt2	Glucose 17 mM + Glutamine 2.500000e-01 mM + Insulin 10000 ng/ml + EAA 1.000000e-01 X	0.599807	0.602664	0.665653	0.510925	0.435361	0.293218	0.556867	0.576389	0.449575	0.577887	0.619611	0.422698	0.574607	0.654494	0.5717	0.511608	0.705074	0.473783	0.501006	0.690964	0.587005	0.448036	0.653087	0.655345	0.723142	0.53441	0.530707	0.624072	0.624413	0.673753	0.488577	0.463805	0.631157	0.664676	0.54457	0.568128	0.475034	0.621235	0.594528	0.479503	0.613863	0.532755	0.545202	0.571701	0.675564	0.541636	0.613302
Cell_0005	TFEB_TR	Glucose 17 mM + Glutamine 2.500000e-01 mM + Insulin 10000 ng/ml + EAA 1.000000e-01 X	0.970937	1.38376	2.40229	2.93274	2.73507	0.726593	1.65994	2.72419	1.38458	0.691975	1.46162	3.4017	2.24185	1.09786	0.99405	2.57019	1.49827	1.33921	1.3232	1.32844	1.98116	1.0774	1.79436	1.65688	1.33016	1.75841	2.06621	1.18998	1.01906	1.20676	2.14644	2.10295	1.72808	0.95735	1.68211	1.35525	0.929393	0.851357	0.583487	1.65135	1.43926	1.78332	1.30614	2.69291	1.77639	1.77366	1.05159
Cell_0005	FOXO_TR	Glucose 17 mM + Glutamine 2.500000e-01 mM + Insulin 10000 ng/ml + EAA 1.000000e-01 X	1.68559	2.0023	3.02494	3.93782	1.69148	1.97654	2.11614	3.78897	1.69131	1.68115	2.46491	2.603	2.89769	1.06426	1.61198	2.93971	2.83089	2.6089	1.44728	1.72538	3.07429	2.9428	2.36956	1.50206	2.34958	2.44013	2.27451	0.910372	2.11862	2.23079	2.23987	2.73569	1.39966	1.61637	3.06203	2.27574	1.73481	1.18227	2.11232	1.97037	2.68351	2.04373	1.93972	2.09686	2.36235	2.40525	1.20149
Cell_0005	AMPKARt2	Glucose 17 mM + Glutamine 2.500000e-01 mM + Insulin 10000 ng/ml + EAA 1.000000e-01 X	0.601538	0.609396	0.665943	0.514438	0.419403	0.313263	0.553297	0.577883	0.469178	0.570024	0.614749	0.420894	0.588791	0.634398	0.584305	0.513187	0.711566	0.479708	0.517411	0.700724	0.581379	0.473951	0.673712	0.654078	0.726669	0.532499	0.525157	0.631007	0.636185	0.678481	0.484929	0.445846	0.637479	0.658702	0.532419	0.582136	0.468257	0.606593	0.615	0.48193	0.631551	0.53725	0.516025	0.569369	0.693563	0.545065	0.627569
Cell_0006	TFEB_TR	Glucose 17 mM + Glutamine 2.500000e-01 mM + Insulin 10000 ng/ml + EAA 1.000000e-01 X	0.994701	1.3927	2.58836	2.93865	3.0745	0.723192	1.7029	2.1469	1.4428	0.792033	2.12947	2.99115	2.13385	1.42611	0.94007	2.93226	1.41184	1.38178	1.49749	1.42961	1.90491	1.19682	1.73521	1.76562	1.14054	1.95961	2.1473	0.924735	1.18903	1.47093	2.12002	2.10672	1.70109	0.873016	1.79627	1.17002	0.94132	0.874783	0.611237	1.63637	1.21543	1.9717	1.24179	2.4095	1.56476	1.86393	0.978261
Cell_0006	FOXO_TR	Glucose 17 mM + Glutamine 2.500000e-01 mM + Insulin 10000 ng/ml + EAA 1.000000e-01 X	1.64638	1.82534	2.96876	3.82475	1.67446	1.96466	2.19743	3.74521	1.86092	1.64227	2.29718	2.60716	2.92328	1.04927	1.58893	3.17115	2.82738	2.74768	1.45236	1.81336	3.05575	2.91139	2.36187	1.5186	2.35955	2.38718	2.27798	0.875675	2.00861	2.19668	2.257	2.68634	1.42679	1.61921	2.95978	2.23387	1.72273	1.2373	2.26465	1.9105	2.74363	2.76956	1.91824	2.11966	2.3672	2.4376	1.2623
Cell_0006	AMPKARt2	Glucose 17 mM + Glutamine 2.500000e-01 mM + Insulin 10000 ng/ml + EAA 1.000000e-01 X	0.604027	0.605303	0.651814	0.505462	0.411212	0.308977	0.550052	0.568973	0.464392	0.568653	0.630831	0.405135	0.590948	0.640372	0.587961	0.523329	0.702067	0.487051	0.555452	0.716482	0.583838	0.457858	0.671956	0.659985	0.734168	0.539543	0.5198	0.638104	0.60867	0.684651	0.500506	0.437731	0.63541	0.685437	0.519342	0.597289	0.473693	0.610517	0.63254	0.482193	0.635239	0.507765	0.512036	0.567835	0.703296	0.556164	0.642815
Cell_0007	TFEB_TR	Glucose 17 mM + Glutamine 2.500000e-01 mM + Insulin 10000 ng/ml + EAA 1.000000e-01 X	1.06553	1.41127	2.41715	2.90986	3.1316	0.928423	1.77552	2.25097	1.64932	0.924888	2.82384	2.90449	2.15523	1.17521	0.809651	2.89729	1.5536	1.04654	1.62648	1.11363	1.8348	1.27688	1.63631	1.29135	1.15256	1.57432	1.71739	0.92427	1.28013	1.40414	1.93085	2.00993	1.48753	0.978242	1.74484	1.24472	0.905907	0.857573	0.618817	1.64307	1.13791	2.1299	1.42391	2.50172	1.22809	1.93271	0.918043
Cell_0007	FOXO_TR	Glucose 17 mM + Glutamine 2.500000e-01 mM + Insulin 10000 ng/ml + EAA 1.000000e-01 X	1.65537	1.77857	2.96986	3.72403	1.61072	2.29908	2.34554	3.55043	2.04998	1.5769	2.14512	2.65982	2.94589	1.07707	1.50873	3.24924	2.95872	2.977	1.48798	1.75336	3.09654	2.71825	2.48476	1.56327	2.41549	2.41753	2.47796	0.78409	1.97555	2.20209	2.10624	2.65444	1.4351	1.63682	2.90449	2.22239	1.6738	1.22034	2.26549	1.99521	2.81105	2.83186	1.83778	2.26454	2.49381	2.40547	1.28081
Cell_0007	AMPKARt2	Glucose 17 mM + Glutamine 2.500000e-01 mM + Insulin 10000 ng/ml + EAA 1.000000e-01 X	0.603308	0.610418	0.648443	0.503384	0.407811	0.636129	0.545291	0.563438	0.455156	0.557359	0.644427	0.403559	0.572514	0.652304	0.581499	0.532836	0.685986	0.47291	0.581397	0.709698	0.587992	0.471423	0.632736	0.660572	0.740512	0.54601	0.535705	0.647768	0.551798	0.683517	0.502322	0.438035	0.638555	0.683527	0.524858	0.608014	0.500987	0.615073	0.645878	0.496658	0.645176	0.487476	0.500266	0.565147	0.686153	0.544097	0.645459
Cell_0008	TFEB_TR	Glucose 17 mM + Glutamine 2.500000e-01 mM + Insulin 10000 ng/ml + EAA 1.000000e-01 X	1.0111	1.39256	2.15859	2.86654	2.9427	0.79659	1.84211	2.26879	1.69781	1.01895	2.04902	2.99415	2.29008	1.06579	0.959697	2.55657	1.76974	0.946722	1.53848	0.897765	1.83409	1.28506	1.57953	1.04316	1.26013	1.49968	1.49179	1.03821	1.30925	1.40022	1.84179	1.89977	1.4861	1.08003	1.56517	1.55338	0.876341	0.866994	0.622087	1.73771	1.34047	2.1757	1.73014	2.60602	1.15774	1.82363	0.950838
Cell_0008	FOXO_TR	Glucose 17 mM + Glutamine 2.500000e-01 mM + Insulin 10000 ng/ml + EAA 1.000000e-01 X	1.65	1.86181	2.95939	3.7214	1.49142	2.22933	2.41923	3.61966	2.19866	1.49244	2.16775	2.67124	2.83828	1.05587	1.47266	3.0946	3.08748	3.08252	1.51009	1.72161	3.11894	2.60432	2.65606	1.52877	2.45638	2.47377	2.51132	1.12549	2.03384	2.21486	1.93646	2.69617	1.44223	1.61822	2.89044	2.26371	1.6978	1.18	2.30695	2.15989	2.70248	2.67076	1.81012	2.30496	2.53514	2.11305	1.20405
Cell_0008	AMPKARt2	Glucose 17 mM + Glutamine 2.500000e-01 mM + Insulin 10000 ng/ml + EAA 1.000000e-01 X	0.59819	0.637926	0.653153	0.504872	0.406569	0.645519	0.542147	0.572236	0.448318	0.539563	0.636066	0.420369	0.569998	0.660053	0.583565	0.524577	0.678493	0.461486	0.597094	0.68689	0.589475	0.518166	0.623298	0.654836	0.746065	0.54005	0.532059	0.666243	0.507234	0.676769	0.487758	0.443181	0.636276	0.670911	0.536404	0.605928	0.529644	0.620225	0.615314	0.510074	0.670941	0.487462	0.463594	0.570733	0.669246	0.539817	0.651343
Cell_0009	TFEB_TR	Glucose 17 mM + Glutamine 2.500000e-01 mM + Insulin 10000 ng/ml + EAA 1.000000e-01 X	1.03951	1.34498	2.24087	2.82304	3.14587	0.838435	1.93438	2.36663	1.57183	1.08528	1.56389	2.69534	2.18128	1.10297	1.07558	2.60661	1.72273	1.15066	1.37874	1.02701	1.72251	1.28058	1.67206	1.39828	1.7864	2.05232	1.90804	1.06049	1.31659	1.50977	1.93226	1.8471	1.69017	0.938175	1.621	1.39966	0.844944	0.905217	0.625586	1.81919	1.38287	2.16209	1.75894	2.57729	1.31415	1.65525	1.03747
Cell_0009	FOXO_TR	Glucose 17 mM + Glutamine 2.500000e-01 mM + Insulin 10000 ng/ml + EAA 1.000000e-01 X	1.62318	1.84884	3.04497	3.68118	1.50703	2.19446	2.37349	3.75699	2.26483	1.39184	2.44754	2.62632	2.7294	1.01747	1.49289	3.04169	3.04333	3.0391	1.52346	1.79547	3.10121	2.59213	2.58511	1.44842	2.07289	2.45472	2.55556	1.88426	1.95445	2.21227	2.00592	2.72799	1.41241	1.65842	2.82001	2.24019	1.68184	1.21052	2.38555	2.23428	2.57306	2.64957	1.8338	2.26102	2.50302	1.83043	1.22866
Cell_0009	AMPKARt2	Glucose 17 mM + Glutamine 2.500000e-01 mM + Insulin 10000 ng/ml + EAA 1.000000e-01 X	0.597132	0.653818	0.655308	0.498788	0.415352	0.634468	0.547427	0.578014	0.456628	0.529661	0.633306	0.422665	0.575634	0.661123	0.593337	0.510105	0.675174	0.462003	0.599205	0.690873	0.596392	0.525553	0.639177	0.652085	0.472544	0.536508	0.509554	0.671066	0.472505	0.667235	0.487034	0.446981	0.630296	0.679672	0.543284	0.598855	0.5426	0.628193	0.608832	0.504205	0.677913	0.484917	0.455797	0.576859	0.680423	0.548638	0.669679
Cell_0010	TFEB_TR	Glucose 17 mM + Glutamine 2.500000e-01 mM + Insulin 10000 ng/ml + EAA 1.000000e-01 X	1.19294	1.28004	2.34474	2.76625	3.38292	0.87411	1.93505	2.90182	1.72896	1.15568	1.9303	2.69908	1.8319	1.03474	0.929849	2.6956	1.59137	1.21692	1.2842	1.04396	1.44577	1.24072	1.69598	1.49548	1.55856	2.21176	2.2719	1.06058	1.3032	1.30748	2.03285	1.86931	1.60386	0.883148	1.93443	0.980175	0.82856	0.920847	0.606435	1.78702	1.26421	2.12371	1.61814	2.69167	1.34681	1.51956	1.04086
Cell_0010	FOXO_TR	Glucose 17 mM + Glutamine 2.500000e-01 mM + Insulin 10000 ng/ml + EAA 1.000000e-01 X	1.64654	1.7858	3.11461	3.62408	1.61735	2.25863	2.39486	3.62626	2.23351	1.31662	2.75542	2.61588	2.7403	0.939127	1.51231	2.98611	2.97025	2.97509	1.53942	1.80933	3.09488	2.63014	2.44651	1.44292	2.33609	2.41482	2.94101	2.30431	1.76449	2.17899	2.20531	2.6812	1.37324	1.79405	2.84811	2.18505	1.61732	1.27932	2.29247	2.23536	2.5455	2.62377	1.82148	2.17485	2.51383	1.73997	1.59908
Cell_0010	AMPKARt2	Glucose 17 mM + Glutamine 2.500000e-01 mM + Insulin 10000 ng/ml + EAA 1.000000e-01 X	0.602829	0.646647	0.660846	0.493497	0.423102	0.641349	0.55829	0.589668	0.478821	0.534823	0.635585	0.407644	0.563276	0.654587	0.586563	0.501758	0.666885	0.471984	0.580786	0.70823	0.600991	0.522601	0.632998	0.651487	0.510082	0.540822	0.518605	0.657172	0.440725	0.671284	0.497763	0.440622	0.636735	0.662145	0.529471	0.597367	0.530613	0.633866	0.658659	0.507152	0.661203	0.475835	0.480673	0.570188	0.693295	0.543319	0.679388
Cell_0011	TFEB_TR	Glucose 17 mM + Glutamine 2.500000e-01 mM + Insulin 10000 ng/ml + EAA 1.000000e-01 X	1.15508	1.1935	2.26369	2.70626	3.15555	0.89481	1.86926	3.271	1.88189	1.22692	1.69119	2.7374	2.03763	1.1661	0.959202	2.3723	1.49807	1.23559	1.19134	0.940118	1.3355	1.13686	1.58409	1.13162	1.37917	1.7738	2.17036	1.0419	1.34755	1.10353	2.05052	1.94978	1.32529	0.940385	1.94377	1.00392	0.839384	0.963793	0.579205	1.71596	1.03654	2.06129	1.56889	0.553097	1.33522	1.54707	0.999553
Cell_0011	FOXO_TR	Glucose 17 mM + Glutamine 2.500000e-01 mM + Insulin 10000 ng/ml + EAA 1.000000e-01 X	1.70849	1.8071	3.0042	3.5729	1.62684	2.3564	2.50569	3.43457	2.14794	1.29822	2.79701	2.60486	2.87521	0.935978	1.54742	2.81959	2.99603	2.91745	1.53902	1.82747	3.11157	2.66568	2.50741	1.54187	2.25831	2.3943	3.17376	2.22921	1.63527	2.14741	2.22851	2.68606	1.38986	1.83822	2.99203	2.24015	1.59356	1.31623	2.16568	2.20983	2.45512	2.57044	1.77217	1.69681	2.53929	1.73021	2.08564
Cell_0011	AMPKARt2	Glucose 17 mM + Glutamine 2.500000e-01 mM + Insulin 10000 ng/ml + EAA 1.000000e-01 X	0.604171	0.645899	0.660519	0.492903	0.427199	0.669716	0.556269	0.623162	0.475817	0.538959	0.637925	0.408314	0.554972	0.664748	0.567008	0.500016	0.657081	0.477372	0.567079	0.697845	0.597952	0.553091	0.618851	0.653312	0.500722	0.545567	0.548194	0.654513	0.428828	0.697405	0.498468	0.436126	0.647084	0.634199	0.509038	0.59693	0.5072	0.634054	0.648543	0.522245	0.65403	0.479502	0.493524	0.660243	0.686249	0.541553	0.669353
Cell_0012	TFEB_TR	Glucose 17 mM + Glutamine 2.500000e-01 mM + Insulin 10000 ng/ml + EAA 1.000000e-01 X	0.970575	1.13134	2.31201	2.66683	3.02686	0.982654	1.82779	3.29204	1.64722	1.2766	1.32114	2.37929	2.61657	1.16611	1.12479	2.28312	1.6508	1.19805	1.2835	1.03608	1.48239	1.08151	1.83799	1.16332	1.52035	1.60296	2.40367	1.03238	1.35204	1.20178	2.04964	2.05922	1.35589	0.87582	1.79212	1.36933	0.838703	1.01636	0.586253	1.67293	0.793803	2.0247	1.55392	0.59154	1.56038	1.73841	0.959877
Cell_0012	FOXO_TR	Glucose 17 mM + Glutamine 2.500000e-01 mM + Insulin 10000 ng/ml + EAA 1.000000e-01 X	1.76786	1.82306	2.90601	3.47097	1.62007	2.38132	2.44264	3.40008	2.12873	1.30416	2.70952	2.5704	3.02187	1.32894	1.55586	2.82591	3.01908	2.95403	1.54562	1.95813	3.11377	2.68023	2.60106	1.66179	2.18119	2.36368	2.84063	2.15687	1.5606	2.12803	2.12618	2.78834	1.33291	1.73493	2.99215	2.34828	1.56019	1.32429	2.20605	2.14198	2.32945	2.58979	1.74195	1.66144	2.50998	1.7746	2.36133
Cell_0012	AMPKARt2	Glucose 17 mM + Glutamine 2.500000e-01 mM + Insulin 10000 ng/ml + EAA 1.000000e-01 X	0.602702	0.656762	0.648586	0.485936	0.438829	0.671296	0.542957	0.647525	0.453447	0.529884	0.652856	0.429212	0.563721	0.686307	0.549986	0.497687	0.649414	0.464917	0.575434	0.692693	0.600253	0.562907	0.6234	0.656707	0.475578	0.553574	0.559927	0.662777	0.441645	0.718685	0.502025	0.435083	0.656228	0.646382	0.52383	0.59003	0.495055	0.633352	0.588494	0.516001	0.659196	0.493176	0.503212	0.66401	0.683554	0.555231	0.654459
Cell_0013	TFEB_TR	Glucose 17 mM + Glutamine 2.500000e-01 mM + Insulin 10000 ng/ml + EAA 1.000000e-01 X	0.979985	1.14671	2.40785	2.63322	3.15702	0.997726	1.76489	3.25979	1.63688	1.28646	1.34303	2.51759	2.51593	1.03142	1.01318	2.38213	2.07794	0.955912	1.61648	1.17547	1.51462	1.11047	2.41857	1.55452	1.78679	1.77791	2.90439	1.1287	1.2846	1.40915	2.00015	2.07559	1.58543	0.90617	2.11246	1.55797	0.832432	0.930841	0.615025	1.6221	0.887059	2.01109	1.55648	0.558916	1.62011	1.82312	0.934796
Cell_0013	FOXO_TR	Glucose 17 mM + Glutamine 2.500000e-01 mM + Insulin 10000 ng/ml + EAA 1.000000e-01 X	1.78976	1.81012	2.9713	3.41235	1.67532	2.31666	2.30594	3.39025	2.19789	1.28818	2.62368	2.59273	3.05206	1.9171	1.50803	2.86379	2.98728	3.05193	1.62683	1.9932	3.04061	2.70621	2.54882	1.68035	2.20979	2.33713	2.52946	2.16622	1.49802	2.11168	2.1161	2.79937	1.33309	1.66176	2.90903	2.38062	1.52109	1.30505	2.266	2.04802	2.34339	2.59469	1.76156	1.67188	2.44925	1.84971	2.61566
Cell_0013	AMPKARt2	Glucose 17 mM + Glutamine 2.500000e-01 mM + Insulin 10000 ng/ml + EAA 1.000000e-01 X	0.602151	0.664666	0.639898	0.475743	0.446321	0.649554	0.544179	0.644708	0.451376	0.523439	0.720192	0.442405	0.567251	0.677412	0.53776	0.486276	0.645156	0.464213	0.58712	0.71886	0.603812	0.54137	0.644536	0.657811	0.474641	0.555751	0.553308	0.660924	0.461649	0.71468	0.515635	0.432703	0.667061	0.644838	0.544011	0.583992	0.487693	0.633201	0.597497	0.505967	0.657419	0.493685	0.517779	0.668129	0.689523	0.559413	0.639337
Cell_0014	TFEB_TR	Glucose 17 mM + Glutamine 2.500000e-01 mM + Insulin 10000 ng/ml + EAA 1.000000e-01 X	1.11587	1.15138	2.24603	2.59079	3.1074	0.977344	1.76328	3.01583	1.92272	1.27841	1.41149	2.75698	2.12992	1.30618	0.918048	2.1142	2.06943	0.957388	1.74988	1.22407	1.38174	1.1171	2.56536	1.54481	1.74706	1.79439	2.74381	1.04561	1.20253	1.53846	1.88631	1.9771	1.59315	1.06714	2.30614	1.41705	0.849995	0.824573	0.623166	1.56975	1.10838	1.96656	1.69272	0.515812	1.28152	1.73259	1.02388
Cell_0014	FOXO_TR	Glucose 17 mM + Glutamine 2.500000e-01 mM + Insulin 10000 ng/ml + EAA 1.000000e-01 X	1.73944	1.84483	3.02216	3.46537	1.67774	2.19865	2.39955	3.30299	2.21321	1.25363	2.6363	2.6375	2.96882	2.16764	1.50755	2.74287	3.00406	3.0976	1.78513	1.89549	2.92987	2.69997	2.48633	1.60562	2.07442	2.3395	2.59355	2.12872	1.47518	2.124	2.18309	2.75668	1.81444	1.65512	2.91122	2.34071	1.54004	1.27558	2.26799	1.97104	2.37721	2.52085	1.8005	1.63278	2.41371	1.81614	2.9033
Cell_0014	AMPKARt2	Glucose 17 mM + Glutamine 2.500000e-01 mM + Insulin 10000 ng/ml + EAA 1.000000e-01 X	0.586116	0.667701	0.642086	0.47834	0.449895	0.635431	0.560381	0.642669	0.4529	0.523594	0.713049	0.432097	0.572565	0.641787	0.539562	0.478905	0.649967	0.475918	0.592758	0.71732	0.595608	0.537242	0.661967	0.662791	0.482528	0.544852	0.543624	0.657776	0.46817	0.705634	0.518726	0.440499	0.658055	0.601666	0.529639	0.582596	0.476571	0.613861	0.631092	0.518748	0.646357	0.485263	0.507554	0.671754	0.683687	0.561824	0.619984
Cell_0015	TFEB_TR	Glucose 17 mM + Glutamine 2.500000e-01 mM + Insulin 10000 ng/ml + EAA 1.000000e-01 X	1.11794	1.10287	2.05067	2.54865	3.01	1.04123	1.84946	2.96366	1.78277	1.28142	1.31908	2.23536	2.20701	1.50086	1.16006	2.00478	1.71582	1.2487	1.54444	1.36633	1.40469	1.10549	2.34398	1.35594	1.41209	1.68338	2.29802	0.861759	1.08376	1.16436	1.88921	1.93352	1.51606	1.16876	1.77845	1.17561	0.861358	0.922639	0.613975	1.55372	1.04375	1.90787	1.77441	0.566068	1.17457	1.67898	1.07084
Cell_0015	FOXO_TR	Glucose 17 mM + Glutamine 2.500000e-01 mM + Insulin 10000 ng/ml + EAA 1.000000e-01 X	1.67667	1.86692	2.97542	3.47554	1.74249	2.11904	2.54471	3.23404	2.18009	1.24008	2.64586	2.63804	2.85055	2.13962	1.56766	2.74208	3.06599	3.21485	1.88428	1.89717	2.87749	2.64252	2.53861	1.57712	1.93099	2.35206	2.63458	2.15275	1.50557	1.83771	2.24256	2.84818	2.50037	1.59733	2.87291	2.27972	1.54885	1.29992	2.33518	1.94164	2.34077	2.47652	1.75807	1.58542	2.42423	1.71592	2.92486
Cell_0015	AMPKARt2	Glucose 17 mM + Glutamine 2.500000e-01 mM + Insulin 10000 ng/ml + EAA 1.000000e-01 X	0.560392	0.666177	0.654052	0.490654	0.4695	0.627581	0.571755	0.646334	0.434518	0.527106	0.719539	0.413241	0.596978	0.625829	0.549967	0.488754	0.659637	0.458457	0.592441	0.668307	0.58826	0.531149	0.65291	0.67445	0.479172	0.544698	0.543262	0.660857	0.471239	0.59731	0.519202	0.445701	0.621733	0.579051	0.524014	0.575086	0.472342	0.594039	0.617926	0.523484	0.632883	0.48273	0.491023	0.675633	0.67837	0.576395	0.613366
Cell_0016	TFEB_TR	Glucose 17 mM + Glutamine 2.500000e-01 mM + Insulin 10000 ng/ml + EAA 1.000000e-01 X	1.01815	1.13747	2.03706	2.50839	2.94499	1.05725	1.80948	3.2015	1.54969	1.27224	1.2766	2.03476	2.21837	1.34138	1.3077	2.20228	1.90964	1.22972	1.40713	1.60415	1.4841	1.1204	2.47036	1.48272	1.19378	1.60819	2.19913	1.15791	1.08288	1.21718	2.00627	1.96686	1.71812	1.25778	1.56369	1.06305	0.84314	1.05178	0.609255	1.55308	0.931561	1.89311	1.57805	0.6455	1.35478	1.67237	0.920021
Cell_0016	FOXO_TR	Glucose 17 mM + Glutamine 2.500000e-01 mM + Insulin 10000 ng/ml + EAA 1.000000e-01 X	1.65295	1.84517	2.9556	3.38082	1.98672	2.09819	2.53598	3.25208	2.21767	1.2512	2.70862	2.64864	2.76875	2.17978	1.57949	2.8313	3.05916	3.35675	1.79829	1.93645	2.84795	2.63202	2.63185	1.61327	1.98055	2.31869	2.55003	2.22133	1.55947	2.02576	2.29315	2.94137	2.74636	1.51204	2.80653	2.23735	1.52247	1.39403	2.36416	1.94076	2.38386	2.54211	1.62161	1.61316	2.50045	1.70672	2.86791
Cell_0016	AMPKARt2	Glucose 17 mM + Glutamine 2.500000e-01 mM + Insulin 10000 ng/ml + EAA 1.000000e-01 X	0.552959	0.662822	0.665893	0.499967	0.482612	0.636127	0.578191	0.636627	0.420077	0.546028	0.721273	0.415395	0.614632	0.643888	0.544926	0.49846	0.6608	0.44193	0.587464	0.629778	0.594714	0.509197	0.635755	0.681756	0.482953	0.558095	0.545767	0.654595	0.504056	0.650168	0.527129	0.434095	0.596979	0.585973	0.539407	0.570747	0.476076	0.615756	0.608775	0.507875	0.622405	0.478268	0.506951	0.67499	0.686876	0.579047	0.623824
Cell_0017	TFEB_TR	Glucose 17 mM + Glutamine 2.500000e-01 mM + Insulin 10000 ng/ml + EAA 1.000000e-01 X	0.970651	1.21043	2.00988	2.47972	2.75512	1.02166	1.69121	2.75395	1.755	1.22809	1.34341	2.45472	1.98546	1.37719	1.1075	2.08393	2.29284	0.983302	1.58172	1.70665	1.409	1.11291	2.70299	1.45141	1.50068	1.48356	2.18578	1.50815	1.19767	1.23003	2.06499	2.01906	1.88993	1.22562	1.98469	1.02087	0.818209	1.04114	0.611396	1.53692	1.02574	1.91511	1.43573	0.654707	1.29673	1.61499	0.910245
Cell_0017	FOXO_TR	Glucose 17 mM + Glutamine 2.500000e-01 mM + Insulin 10000 ng/ml + EAA 1.000000e-01 X	1.62996	1.87124	2.94642	3.30046	2.12103	2.04494	2.53395	3.25254	2.2409	1.23515	2.79323	2.65739	2.75444	2.29723	1.55058	2.783	3.07752	3.25016	1.77996	1.82488	2.80227	2.65183	2.64851	1.63059	2.02692	2.22443	2.52438	2.23205	1.59133	1.86461	2.34511	2.90492	2.69821	1.50815	2.85976	2.23845	1.52231	1.45959	2.25935	1.91998	2.44772	2.63825	1.52948	1.62093	2.61534	1.69575	3.06963
Cell_0017	AMPKARt2	Glucose 17 mM + Glutamine 2.500000e-01 mM + Insulin 10000 ng/ml + EAA 1.000000e-01 X	0.555973	0.659646	0.662504	0.514278	0.465069	0.656893	0.586999	0.621889	0.417095	0.562705	0.712851	0.440232	0.611324	0.661165	0.536173	0.494643	0.653635	0.468317	0.600738	0.611699	0.601058	0.508742	0.641245	0.677486	0.503573	0.560598	0.540867	0.640443	0.549192	0.633572	0.520676	0.43137	0.608508	0.588455	0.543979	0.579094	0.480052	0.634909	0.601983	0.500338	0.615691	0.472612	0.530647	0.673507	0.690489	0.571849	0.624482
Cell_0018	TFEB_TR	Glucose 17 mM + Glutamine 2.500000e-01 mM + Insulin 10000 ng/ml + EAA 1.000000e-01 X	1.04614	1.16404	1.97039	2.45966	2.80523	1.06464	1.70335	2.24295	1.83323	1.17535	1.34947	2.44843	2.02717	1.44269	0.970603	1.91194	2.22837	0.954065	1.74029	1.53782	1.47509	1.12111	2.53203	1.14203	1.92636	1.41991	2.31452	1.3191	1.14484	1.22241	2.11994	2.16701	1.56857	1.09705	1.856	0.992177	0.795361	1.01479	0.615857	1.51065	1.10523	1.91663	1.61528	0.657261	1.19812	1.5964	1.13296
Cell_0018	FOXO_TR	Glucose 17 mM + Glutamine 2.500000e-01 mM + Insulin 10000 ng/ml + EAA 1.000000e-01 X	1.61529	1.93084	2.90097	3.24739	2.0017	1.97828	2.54788	3.18084	2.16289	1.20041	2.79592	2.64364	2.7774	2.34566	1.52927	2.68632	3.23969	3.02388	2.26993	1.67836	2.78807	2.62323	2.62783	1.60183	1.99545	2.17385	2.51602	2.23989	1.61903	1.6401	2.40491	2.82758	2.71696	1.54084	2.95295	2.2606	1.50811	1.38628	2.22901	1.91542	2.39983	2.65485	1.52688	1.58499	2.65912	1.58181	3.26052
Cell_0018	AMPKARt2	Glucose 17 mM + Glutamine 2.500000e-01 mM + Insulin 10000 ng/ml + EAA 1.000000e-01 X	0.552456	0.652282	0.646917	0.54108	0.452029	0.654319	0.588337	0.618626	0.407415	0.55629	0.709596	0.452747	0.616296	0.647727	0.545848	0.488723	0.648134	0.492025	0.602618	0.574912	0.598276	0.510023	0.647545	0.666142	0.510337	0.556612	0.54229	0.639449	0.562161	0.613946	0.50782	0.442685	0.628736	0.59152	0.556644	0.567058	0.48568	0.618113	0.544377	0.502458	0.611934	0.475214	0.531638	0.679447	0.690368	0.576938	0.616007
Cell_0019	TFEB_TR	Glucose 17 mM + Glutamine 2.500000e-01 mM + Insulin 10000 ng/ml + EAA 1.000000e-01 X	1.18134	1.11658	2.10858	2.41759	3.15401	1.10941	1.75706	2.65227	1.64381	1.13901	1.33668	2.35242	2.15995	1.28056	1.07042	1.20752	2.05957	1.03834	1.55266	1.29832	1.70528	1.20105	2.4147	1.30781	1.70893	1.60343	2.49152	1.17083	1.05474	1.29073	2.161	2.29068	1.24835	1.18016	1.41992	1.03955	0.777377	1.01225	0.611611	1.51261	1.04264	1.90779	1.67288	0.688823	1.29013	1.61195	1.19836
Cell_0019	FOXO_TR	Glucose 17 mM + Glutamine 2.500000e-01 mM + Insulin 10000 ng/ml + EAA 1.000000e-01 X	1.61315	1.9205	2.93447	3.19398	1.84991	1.95249	2.48443	3.17171	2.09933	1.21024	2.76059	2.67426	2.81208	2.27525	1.48224	2.31156	3.356	2.99449	3.02947	1.63341	2.789	2.62055	2.70563	1.51273	1.99861	2.21851	2.49155	2.27464	1.69237	1.64009	2.43362	2.69343	2.70218	1.48931	3.02504	2.28004	1.45953	1.33297	2.24724	1.99878	2.39723	2.62117	1.53597	1.61505	2.60841	1.52164	3.20864
Cell_0019	AMPKARt2	Glucose 17 mM + Glutamine 2.500000e-01 mM + Insulin 10000 ng/ml + EAA 1.000000e-01 X	0.548662	0.647855	0.629311	0.563184	0.463699	0.646253	0.579113	0.622967	0.398629	0.553844	0.71477	0.439486	0.630665	0.627407	0.550954	0.701392	0.647458	0.490314	0.524959	0.528437	0.601092	0.493127	0.641231	0.662778	0.494509	0.553055	0.552126	0.650207	0.559987	0.62555	0.509323	0.443835	0.63209	0.601588	0.569084	0.537316	0.491103	0.622399	0.493867	0.501249	0.615073	0.474014	0.526664	0.68329	0.702943	0.574839	0.62346
Cell_0020	TFEB_TR	Glucose 17 mM + Glutamine 2.500000e-01 mM + Insulin 10000 ng/ml + EAA 1.000000e-01 X	1.23509	1.19839	2.2927	2.34908	3.18737	1.09568	1.79115	2.69117	1.66717	1.1123	1.35215	2.57803	1.91552	1.09516	1.12339	1.29261	1.93066	1.06833	1.4934	1.36927	1.62969	1.24351	2.57567	1.64811	1.32386	1.75168	2.14639	1.35077	1.1535	1.37675	2.07895	2.19188	1.48954	1.35532	1.82022	1.12747	0.775651	1.09916	0.603526	1.5927	1.09644	1.91934	1.42319	0.682061	1.32615	1.55921	1.08889
Cell_0020	FOXO_TR	Glucose 17 mM + Glutamine 2.500000e-01 mM + Insulin 10000 ng/ml + EAA 1.000000e-01 X	1.58296	1.86303	2.98473	3.17193	1.73091	1.8862	2.46543	3.25218	2.13205	1.22648	2.79272	2.65446	2.83074	2.17288	1.46229	2.16604	3.29458	3.13392	3.27189	1.6083	2.80026	2.64759	2.79841	1.4569	2.04215	2.24827	2.48266	2.30615	1.7409	1.71499	2.40807	2.5314	2.69849	1.40903	3.13388	2.3105	1.45032	1.62042	2.08902	2.12908	2.49283	2.5977	1.55991	1.69659	2.56803	1.55073	3.11931
Cell_0020	AMPKARt2	Glucose 17 mM + Glutamine 2.500000e-01 mM + Insulin 10000 ng/ml + EAA 1.000000e-01 X	0.539395	0.65108	0.617251	0.571655	0.477375	0.655874	0.582426	0.621247	0.399638	0.568421	0.723149	0.432758	0.62958	0.638615	0.541897	0.691984	0.646815	0.500184	0.42648	0.509043	0.614736	0.507261	0.651446	0.677409	0.489816	0.546697	0.553443	0.653391	0.563657	0.626143	0.508297	0.442535	0.62761	0.606462	0.544126	0.54818	0.484559	0.639648	0.527137	0.499195	0.61824	0.465606	0.53011	0.684919	0.708731	0.556958	0.634754
Cell_0021	TFEB_TR	Glucose 17 mM + Glutamine 2.500000e-01 mM + Insulin 10000 ng/ml + EAA 1.000000e-01 X	1.22607	1.32983	2.32468	2.24462	3.0123	1.11438	1.88797	2.26273	1.68506	1.08764	1.30831	2.49916	1.5816	0.95671	1.07825	1.2919	1.82664	1.11898	1.72388	1.62627	1.34507	1.19547	2.55959	1.30103	1.49539	1.54977	1.86805	1.53799	1.26079	1.35171	2.09056	2.08978	1.7743	1.45649	0.717724	1.24813	0.771733	1.26854	0.612908	1.71219	1.22386	1.89811	1.3586	0.658374	1.31122	1.51373	1.00464
Cell_0021	FOXO_TR	Glucose 17 mM + Glutamine 2.500000e-01 mM + Insulin 10000 ng/ml + EAA 1.000000e-01 X	1.57467	1.82996	2.89233	3.10888	1.74644	1.76446	2.52415	3.30529	2.21076	1.21181	2.82502	2.54883	2.7963	2.14391	1.54407	2.20506	3.21331	3.2164	2.98738	1.53831	2.82723	2.56588	2.76216	1.51589	2.09717	2.23584	2.48913	2.30544	1.68091	1.73178	2.4232	2.49759	2.83583	1.41381	2.04646	2.36105	1.46565	2.11505	1.93265	2.19172	2.51362	2.55022	1.58423	1.71695	2.56752	1.50268	3.02105
Cell_0021	AMPKARt2	Glucose 17 mM + Glutamine 2.500000e-01 mM + Insulin 10000 ng/ml + EAA 1.000000e-01 X	0.528736	0.650238	0.62203	0.577111	0.49344	0.646314	0.590718	0.60814	0.395556	0.581237	0.729922	0.450358	0.624119	0.663948	0.547186	0.699018	0.640277	0.513297	0.408869	0.501832	0.622986	0.548789	0.657289	0.691318	0.491048	0.552486	0.547777	0.652388	0.558411	0.624005	0.503856	0.454019	0.625189	0.600165	0.663858	0.583097	0.470332	0.626597	0.579819	0.496555	0.610042	0.464904	0.538399	0.689296	0.696958	0.554907	0.628913
Cell_0022	TFEB_TR	Glucose 17 mM + Glutamine 2.500000e-01 mM + Insulin 10000 ng/ml + EAA 1.000000e-01 X	1.20987	1.40498	2.30945	2.1138	3.221	1.24684	1.96057	2.62067	1.50471	1.07381	1.28405	2.39882	1.73153	1.00346	1.00173	1.41857	1.8822	1.22553	1.432	1.53137	1.32381	1.14148	2.4728	0.954354	1.65537	1.29135	2.31214	1.64625	1.35234	1.32509	2.25105	2.1901	1.69621	1.53717	0.646099	1.2616	0.761112	1.2053	0.622222	1.75787	1.00073	1.84107	1.5171	0.686979	1.3004	1.47468	0.983118
Cell_0022	FOXO_TR	Glucose 17 mM + Glutamine 2.500000e-01 mM + Insulin 10000 ng/ml + EAA 1.000000e-01 X	1.61514	1.78934	2.82169	2.98236	2.17602	1.69086	2.57177	3.30978	2.24231	1.21027	2.78322	2.57171	2.75093	2.17146	1.61079	2.29688	3.21252	3.08902	2.94734	1.478	2.78599	2.40399	2.72273	1.50269	2.10676	2.26322	2.52447	2.21231	1.615	1.7332	2.47106	2.50769	2.9051	1.40973	1.98293	2.40416	1.45366	2.34077	1.93523	2.14043	2.49623	2.48473	1.52392	1.6568	2.56489	1.40022	2.83357
Cell_0022	AMPKARt2	Glucose 17 mM + Glutamine 2.500000e-01 mM + Insulin 10000 ng/ml + EAA 1.000000e-01 X	0.536338	0.650922	0.632135	0.576964	0.507367	0.622111	0.569585	0.600588	0.390001	0.588706	0.732873	0.465094	0.6204	0.663927	0.555721	0.705583	0.631081	0.505795	0.429064	0.47764	0.616434	0.559904	0.626155	0.690005	0.450575	0.562104	0.544915	0.657143	0.566208	0.633291	0.513351	0.462917	0.625027	0.589623	0.665108	0.581571	0.473113	0.629852	0.561644	0.492075	0.604635	0.464098	0.549955	0.675872	0.69521	0.570575	0.620754
Cell_0023	TFEB_TR	Glucose 17 mM + Glutamine 2.500000e-01 mM + Insulin 10000 ng/ml + EAA 1.000000e-01 X	1.14946	0.947787	2.34045	2.03818	3.45103	1.46557	1.93071	2.57003	1.53874	1.06876	1.3511	2.79316	2.02611	1.06192	0.870299	1.48977	1.90641	1.28861	1.01717	1.31406	1.53758	1.09293	2.4965	1.34357	1.44352	1.35598	2.48864	1.50954	1.47862	1.40499	2.20295	2.25714	1.64516	1.43414	0.657882	1.02828	0.774295	1.03012	0.61581	1.73677	0.911059	1.81259	1.5472	0.707289	1.23635	1.40698	1.09426
Cell_0023	FOXO_TR	Glucose 17 mM + Glutamine 2.500000e-01 mM + Insulin 10000 ng/ml + EAA 1.000000e-01 X	1.6178	1.32576	2.901	2.93123	2.72659	1.66561	2.6113	3.27716	2.17977	1.17587	2.75787	2.65373	2.73485	2.20134	1.55868	2.2931	3.2741	2.85875	3.18819	1.46565	2.7542	2.32101	2.68874	1.50401	2.01828	2.28452	2.52502	2.08303	1.68019	1.72256	2.39979	2.41696	2.86995	1.33228	2.01391	2.394	1.45244	2.27593	1.89154	2.06771	2.57849	2.43265	1.47057	1.59691	2.59407	1.42722	2.75071
Cell_0023	AMPKARt2	Glucose 17 mM + Glutamine 2.500000e-01 mM + Insulin 10000 ng/ml + EAA 1.000000e-01 X	0.540099	0.591531	0.622202	0.565233	0.489127	0.620501	0.553828	0.609035	0.397402	0.590555	0.726461	0.455473	0.603748	0.651468	0.542163	0.704715	0.628098	0.498402	0.427589	0.486252	0.606654	0.548154	0.6112	0.691837	0.377094	0.55744	0.546712	0.652125	0.596195	0.628823	0.521718	0.461243	0.627183	0.589868	0.666088	0.563364	0.500741	0.660271	0.51701	0.489071	0.615158	0.451652	0.555394	0.646529	0.705363	0.57785	0.621275
Cell_0024	TFEB_TR	Glucose 17 mM + Glutamine 2.500000e-01 mM + Insulin 10000 ng/ml + EAA 1.000000e-01 X	1.15747	0.921981	2.32765	2.01879	3.23937	1.61193	1.91066	1.84974	1.78459	1.05763	1.40871	3.07818	1.86965	1.01968	0.936517	1.34095	2.05889	1.13704	1.47199	1.61939	1.71003	1.0513	2.2489	1.66893	1.38537	1.62966	2.01362	1.35977	1.41037	1.48392	2.00968	2.13235	1.73019	1.35194	0.671078	1.09049	0.803332	1.14595	0.632674	1.74377	1.60186	1.78996	1.57743	0.628375	1.20441	1.48301	1.17699
Cell_0024	FOXO_TR	Glucose 17 mM + Glutamine 2.500000e-01 mM + Insulin 10000 ng/ml + EAA 1.000000e-01 X	1.59644	1.40549	2.95756	2.93746	2.80241	1.62177	2.62658	3.24849	2.12176	1.13466	2.81804	2.58977	2.69313	2.20339	1.47623	2.22238	3.36298	2.75374	3.08245	1.46024	2.84555	2.34977	2.51078	1.94547	1.8973	2.23439	2.48665	2.06541	1.80098	1.69086	2.28064	2.34302	2.93707	1.34649	2.08895	2.34389	1.49344	2.24483	1.81594	2.07391	2.70457	2.37438	1.58864	1.59256	2.65457	1.56323	2.80444
Cell_0024	AMPKARt2	Glucose 17 mM + Glutamine 2.500000e-01 mM + Insulin 10000 ng/ml + EAA 1.000000e-01 X	0.524096	0.576081	0.603314	0.555815	0.458261	0.618563	0.571643	0.610837	0.3985	0.587616	0.698956	0.432387	0.599725	0.654642	0.534784	0.703882	0.63242	0.501676	0.434174	0.569969	0.610635	0.549261	0.635334	0.699291	0.340653	0.560176	0.549239	0.636077	0.601503	0.623333	0.517793	0.464805	0.621394	0.595561	0.674539	0.554406	0.532615	0.663316	0.508281	0.49242	0.623348	0.446575	0.546948	0.635356	0.70833	0.57707	0.619581
Cell_0025	TFEB_TR	Glucose 17 mM + Glutamine 2.500000e-01 mM + Insulin 10000 ng/ml + EAA 1.000000e-01 X	1.22186	0.852844	2.35166	1.9911	3.07939	1.67074	1.98504	2.42996	1.80876	1.0564	1.40519	3.02239	1.92377	1.37803	1.18726	1.30224	2.45186	0.920228	1.80127	1.98521	1.05319	1.06947	1.87093	1.49958	1.43156	1.72771	1.85187	1.48579	1.20358	1.56225	2.05496	1.96778	1.82344	1.63048	0.620112	1.68376	0.838247	1.29578	0.680061	1.78053	1.99669	1.77089	1.70942	0.553097	1.11634	1.61468	1.07667
Cell_0025	FOXO_TR	Glucose 17 mM + Glutamine 2.500000e-01 mM + Insulin 10000 ng/ml + EAA 1.000000e-01 X	1.62556	1.40013	2.90661	2.86015	2.58875	1.5751	2.62823	3.31466	2.15866	1.20306	2.91104	2.55163	2.61396	2.19005	1.42531	2.1488	3.3718	2.66658	2.80326	1.40762	1.839	2.38923	2.39597	2.60736	1.80097	2.20565	2.53745	2.14016	1.80777	1.63889	2.29189	2.35765	3.0165	1.47156	2.01491	2.33967	1.55009	2.27618	1.86175	2.11189	2.78944	2.37373	1.82657	1.60292	2.63573	1.60871	2.82884
Cell_0025	AMPKARt2	Glucose 17 mM + Glutamine 2.500000e-01 mM + Insulin 10000 ng/ml + EAA 1.000000e-01 X	0.524788	0.591411	0.601951	0.554749	0.451269	0.607059	0.561225	0.599237	0.383154	0.592457	0.665189	0.411999	0.619346	0.653906	0.55042	0.701958	0.639208	0.508602	0.446373	0.638762	0.684244	0.560968	0.636227	0.695284	0.363166	0.567979	0.544668	0.633994	0.5848	0.631486	0.514057	0.475245	0.603021	0.590456	0.689604	0.534551	0.546868	0.643193	0.492188	0.503563	0.622116	0.457783	0.539087	0.647132	0.708364	0.580873	0.612689
Cell_0026	TFEB_TR	Glucose 17 mM + Glutamine 2.500000e-01 mM + Insulin 10000 ng/ml + EAA 1.000000e-01 X	1.11731	0.797033	2.49773	1.98086	3.20306	1.75725	2.056	3.18119	1.68006	1.08905	1.35579	2.98932	2.4732	1.69689	1.17354	1.42986	2.36311	0.978295	1.28645	1.75384	1.28407	1.10185	1.90434	1.36512	1.26601	1.4978	1.92301	1.29825	1.14669	1.73063	2.25414	1.90253	1.96865	1.76748	0.583684	1.86722	0.896493	1.25902	0.71242	1.81628	1.42131	1.81086	1.74335	0.626827	1.00459	1.57997	1.09461
Cell_0026	FOXO_TR	Glucose 17 mM + Glutamine 2.500000e-01 mM + Insulin 10000 ng/ml + EAA 1.000000e-01 X	1.6426	1.41829	2.78098	2.7381	2.57796	1.54389	2.66059	3.38734	2.20103	1.19935	2.91925	2.58645	2.57728	2.22413	1.38396	2.12543	3.30883	2.46249	2.8606	1.33257	1.90885	2.34827	2.4833	2.93926	1.70751	2.25325	2.62805	2.20377	1.76276	1.5469	2.37791	2.33663	2.99833	1.50261	1.86917	2.40196	1.5815	2.24175	1.90305	2.13394	2.82214	2.44758	2.0979	1.56651	2.52853	1.62799	2.90647
Cell_0026	AMPKARt2	Glucose 17 mM + Glutamine 2.500000e-01 mM + Insulin 10000 ng/ml + EAA 1.000000e-01 X	0.541564	0.607429	0.617179	0.54461	0.448311	0.619406	0.530264	0.597395	0.381436	0.610209	0.647401	0.402304	0.618353	0.633361	0.561077	0.704017	0.642503	0.521909	0.445859	0.628293	0.672278	0.577149	0.61707	0.687162	0.388637	0.558291	0.538618	0.641269	0.586172	0.618072	0.50809	0.474483	0.59304	0.592683	0.693255	0.513101	0.542739	0.625448	0.464086	0.506336	0.630692	0.462061	0.5454	0.663245	0.706017	0.58354	0.607552
Cell_0027	TFEB_TR	Glucose 17 mM + Glutamine 2.500000e-01 mM + Insulin 10000 ng/ml + EAA 1.000000e-01 X	1.06354	0.80481	2.46436	1.98398	3.20495	1.71411	2.01239	2.80753	1.77093	1.13938	1.34573	2.82176	2.37514	1.35402	1.10337	1.45594	1.81611	1.09152	1.06351	1.35151	1.21864	1.10218	2.1577	1.35194	1.15939	1.35505	1.80132	1.00881	1.1889	1.76277	2.35219	1.97376	2.00679	1.49033	0.628323	1.45032	0.932963	1.28696	0.711923	1.07868	1.26432	1.84105	1.77588	0.768888	1.24037	1.58091	1.25911
Cell_0027	FOXO_TR	Glucose 17 mM + Glutamine 2.500000e-01 mM + Insulin 10000 ng/ml + EAA 1.000000e-01 X	1.62444	1.49946	2.67852	2.66186	2.68723	1.49659	2.61777	3.32239	2.20339	1.1748	2.79185	2.51691	2.60273	2.27009	1.39386	2.13888	3.31675	2.44635	2.93999	1.3087	1.82968	2.30483	2.49206	3.00824	1.61221	2.27431	2.65903	2.25226	1.80612	1.46669	2.45968	2.2842	3.02768	1.41361	1.9018	2.4306	1.56096	2.18422	1.8326	1.60528	2.83727	2.4423	2.41583	1.50845	2.47937	1.82214	2.98298
Cell_0027	AMPKARt2	Glucose 17 mM + Glutamine 2.500000e-01 mM + Insulin 10000 ng/ml + EAA 1.000000e-01 X	0.538875	0.6041	0.639135	0.519599	0.440168	0.637223	0.5516	0.604867	0.393722	0.630738	0.619064	0.399731	0.603917	0.622056	0.557131	0.708776	0.638874	0.52592	0.464775	0.613392	0.664353	0.593005	0.629903	0.677736	0.391978	0.558675	0.538725	0.640343	0.593138	0.586426	0.50091	0.462351	0.601741	0.610918	0.681565	0.512182	0.537266	0.617803	0.5047	0.659663	0.642632	0.452688	0.553256	0.671819	0.699246	0.575931	0.614403
Cell_0028	TFEB_TR	Glucose 17 mM + Glutamine 2.500000e-01 mM + Insulin 10000 ng/ml + EAA 1.000000e-01 X	1.27073	0.841233	2.20905	1.96369	3.1095	1.4647	1.9624	3.62136	1.84823	1.20552	1.4314	2.75303	1.84692	1.21296	1.25945	1.29301	1.68214	1.06381	1.34062	1.16264	1.15872	1.11246	2.13245	1.30552	1.18573	1.60156	2.01072	1.45334	1.30092	1.46086	2.32408	2.09936	2.06086	1.33498	0.686462	1.46981	0.906004	1.27788	0.684367	1.05609	1.79298	1.8007	1.91291	0.863402	1.54792	1.64789	1.25188
Cell_0028	FOXO_TR	Glucose 17 mM + Glutamine 2.500000e-01 mM + Insulin 10000 ng/ml + EAA 1.000000e-01 X	1.67215	1.52985	2.77781	2.61668	2.7401	1.43829	2.49502	3.20925	2.23176	1.76873	2.66442	2.52214	2.63321	2.25266	1.43993	2.10415	3.34021	2.73697	2.80435	1.33541	1.77643	2.37034	2.36467	2.98521	1.55667	2.22999	2.7293	2.29141	1.81398	1.45319	2.50572	2.33013	3.08023	1.35551	2.01098	2.3382	1.52234	2.18539	1.69725	1.54598	2.88554	2.35325	2.68935	1.49275	2.5471	1.94062	2.82493
Cell_0028	AMPKARt2	Glucose 17 mM + Glutamine 2.500000e-01 mM + Insulin 10000 ng/ml + EAA 1.000000e-01 X	0.532988	0.599825	0.65724	0.502714	0.44993	0.623282	0.588944	0.607678	0.389705	0.619769	0.559203	0.391934	0.617273	0.62855	0.547385	0.707964	0.633378	0.505294	0.493709	0.618262	0.659046	0.59612	0.654147	0.657471	0.41628	0.570685	0.534474	0.642002	0.5953	0.583856	0.513257	0.457533	0.605372	0.612395	0.672199	0.5292	0.536644	0.632397	0.580183	0.667071	0.633501	0.45124	0.546643	0.667552	0.700726	0.567175	0.629639
Cell_0029	TFEB_TR	Glucose 17 mM + Glutamine 2.500000e-01 mM + Insulin 10000 ng/ml + EAA 1.000000e-01 X	1.28494	0.843705	2.17862	1.98639	3.17172	1.35637	1.10273	5.05274	1.59016	1.32698	1.47351	3.322	2.10818	1.4936	1.15245	1.0601	1.87955	1.26892	1.38236	1.17991	1.15157	1.10082	1.97239	1.31958	1.13438	1.70915	2.36226	1.76013	1.56061	1.22466	2.23395	2.10608	2.43198	1.335	0.670164	1.90446	0.877083	1.12316	0.649967	1.0647	1.70889	1.80124	1.93607	0.959671	1.35686	1.50188	1.17392
Cell_0029	FOXO_TR	Glucose 17 mM + Glutamine 2.500000e-01 mM + Insulin 10000 ng/ml + EAA 1.000000e-01 X	1.74823	1.51144	2.93085	2.61055	2.79445	1.38621	2.05994	3.16617	2.22822	2.87382	2.57996	2.7008	2.67389	2.24902	1.40446	2.0534	3.27801	2.93985	2.8324	1.35454	1.83488	2.42859	2.26259	2.83416	1.58766	2.22757	2.78959	2.3261	1.82576	1.46646	2.43894	2.40217	3.02987	1.37291	1.98989	2.17808	1.52606	2.27047	1.56732	1.54413	2.84822	2.30467	2.82783	1.49211	2.62157	1.71672	2.66712
Cell_0029	AMPKARt2	Glucose 17 mM + Glutamine 2.500000e-01 mM + Insulin 10000 ng/ml + EAA 1.000000e-01 X	0.542528	0.601669	0.65741	0.50534	0.461803	0.601579	0.632241	0.609436	0.383778	0.559564	0.506144	0.382339	0.627858	0.620106	0.539802	0.714931	0.632593	0.482285	0.496183	0.597872	0.659325	0.595636	0.657642	0.647602	0.460778	0.555547	0.529554	0.64672	0.611941	0.597677	0.534946	0.462058	0.594573	0.597297	0.670716	0.550142	0.534339	0.643398	0.577824	0.663392	0.618849	0.461949	0.53628	0.661027	0.70824	0.568206	0.630651
Cell_0030	TFEB_TR	Glucose 17 mM + Glutamine 2.500000e-01 mM + Insulin 10000 ng/ml + EAA 1.000000e-01 X	1.08745	0.810026	2.27705	2.06332	3.35623	1.49431	1.23348	3.92899	1.49603	1.4903	1.48172	3.69614	2.53231	1.48469	0.883349	1.09045	1.88336	1.48581	1.25878	1.37081	0.926051	1.04589	2.17663	1.3937	1.13773	1.4035	2.25584	1.24343	1.67088	1.35182	2.25573	2.00368	2.60661	1.25377	0.612879	1.9231	0.888902	1.11594	0.653164	1.08091	1.31392	1.8985	1.86936	1.13824	1.10075	1.34222	1.18626
Cell_0030	FOXO_TR	Glucose 17 mM + Glutamine 2.500000e-01 mM + Insulin 10000 ng/ml + EAA 1.000000e-01 X	1.74801	1.51715	2.8557	2.67061	2.81875	1.3538	2.01869	3.16248	2.16576	3.47158	2.41933	2.70972	2.75158	2.29711	1.36143	2.09617	3.23664	2.82275	2.96939	1.36515	1.87175	2.42139	2.17123	2.7517	1.66148	2.28414	2.63621	2.37684	2.18779	1.49445	2.39476	2.34044	2.95551	1.39794	1.89581	2.07873	1.55911	2.40221	1.57099	1.55145	2.66654	2.26384	2.91558	1.46747	2.61917	1.46812	2.75863
Cell_0030	AMPKARt2	Glucose 17 mM + Glutamine 2.500000e-01 mM + Insulin 10000 ng/ml + EAA 1.000000e-01 X	0.544533	0.607342	0.651576	0.503277	0.455685	0.607748	0.613314	0.610865	0.396517	0.505299	0.4923	0.387818	0.610401	0.590223	0.548161	0.72334	0.638143	0.48026	0.49871	0.585199	0.661359	0.603637	0.645819	0.658184	0.472934	0.54203	0.540328	0.642965	0.620559	0.584767	0.538991	0.464554	0.594055	0.594085	0.675764	0.556477	0.536092	0.627852	0.533073	0.661946	0.624069	0.468903	0.540168	0.664481	0.713655	0.571839	0.628816
Cell_0031	TFEB_TR	Glucose 17 mM + Glutamine 2.500000e-01 mM + Insulin 10000 ng/ml + EAA 1.000000e-01 X	1.2074	0.795798	2.0875	2.10255	3.5437	1.58757	1.23032	1.99297	1.77151	1.60016	1.5979	3.10631	2.30894	1.39483	1.00154	1.41285	1.73388	1.18998	1.16927	1.28368	0.814547	1.03644	2.5927	1.4786	1.23688	0.816733	2.07621	1.09008	1.53833	1.40378	2.40924	1.96756	2.2463	1.30049	0.594192	1.68189	0.910081	1.21737	0.686594	1.07865	1.52061	1.99758	1.94384	1.36851	1.18478	1.46315	1.18867
Cell_0031	FOXO_TR	Glucose 17 mM + Glutamine 2.500000e-01 mM + Insulin 10000 ng/ml + EAA 1.000000e-01 X	1.73028	1.52286	2.7367	2.72094	2.80748	1.38126	2.02982	3.1848	2.16664	3.35299	2.3068	2.56369	2.79063	2.25914	1.44239	2.18868	3.22498	2.56586	2.8872	1.38274	1.88086	2.49689	2.11765	2.82644	1.67282	1.67958	2.38317	2.39981	2.72835	1.51517	2.50559	2.23086	2.90415	1.40561	1.8394	2.05485	1.56091	2.4537	1.69458	1.52179	2.67629	2.2237	3.00884	1.4824	2.56867	1.48967	2.82928
Cell_0031	AMPKARt2	Glucose 17 mM + Glutamine 2.500000e-01 mM + Insulin 10000 ng/ml + EAA 1.000000e-01 X	0.540656	0.616092	0.660321	0.488298	0.453409	0.63207	0.613659	0.61001	0.400557	0.499289	0.504792	0.407034	0.60428	0.579028	0.560694	0.705307	0.647654	0.493311	0.51256	0.602929	0.659472	0.609809	0.623888	0.65801	0.468849	0.745668	0.552104	0.643021	0.594801	0.564276	0.545473	0.463387	0.605423	0.599024	0.690588	0.562575	0.54071	0.619334	0.531955	0.666753	0.630288	0.471565	0.55034	0.668947	0.717819	0.574393	0.647831
Cell_0032	TFEB_TR	Glucose 17 mM + Glutamine 2.500000e-01 mM + Insulin 10000 ng/ml + EAA 1.000000e-01 X	1.35278	0.80309	1.89525	2.10592	3.54371	1.57194	1.18938	2.31903	1.79468	1.60907	1.65766	2.56672	2.08269	1.267	1.10527	1.48288	1.71733	0.884614	1.15085	1.00573	1.1238	1.05141	2.56707	1.49702	1.20951	0.742138	2.02692	1.54106	1.54782	1.19932	2.37241	1.96694	2.01857	1.33978	0.604752	1.63915	0.920875	1.22182	0.687188	1.07877	1.68241	2.04788	2.01523	1.47291	1.11487	1.70132	1.17825
Cell_0032	FOXO_TR	Glucose 17 mM + Glutamine 2.500000e-01 mM + Insulin 10000 ng/ml + EAA 1.000000e-01 X	1.72202	1.54563	2.78334	2.70183	2.83058	1.4086	2.03819	3.22415	2.15901	3.14761	2.35585	2.67437	2.73883	2.12744	1.45644	2.18783	3.17795	2.47804	2.76188	1.35988	1.95752	2.54637	2.12646	2.8371	1.63589	1.6653	2.30133	2.40558	2.94416	1.41938	2.52638	2.18704	2.88876	1.45905	1.85341	2.05479	1.52963	2.39011	1.74622	1.50866	2.92946	2.23763	3.08484	1.52067	2.51403	1.73464	2.76188
Cell_0032	AMPKARt2	Glucose 17 mM + Glutamine 2.500000e-01 mM + Insulin 10000 ng/ml + EAA 1.000000e-01 X	0.549852	0.614734	0.669157	0.48849	0.459808	0.647642	0.62006	0.609833	0.389314	0.505701	0.518242	0.420945	0.615186	0.611178	0.555428	0.682489	0.65024	0.5005	0.50377	0.612516	0.662362	0.611217	0.619971	0.645947	0.482018	0.745152	0.550053	0.651513	0.576362	0.572469	0.571926	0.463127	0.602318	0.6083	0.696811	0.584603	0.534624	0.628499	0.548605	0.665727	0.621549	0.474572	0.547068	0.665982	0.713798	0.581408	0.655499
Cell_0033	TFEB_TR	Glucose 17 mM + Glutamine 2.500000e-01 mM + Insulin 10000 ng/ml + EAA 1.000000e-01 X	1.18044	0.779834	1.98961	2.12945	3.33583	1.54846	1.27254	3.22977	1.61136	1.59452	1.61422	2.69968	2.17207	0.904802	0.938546	1.33196	2.06343	1.01696	1.25712	1.17473	1.27284	1.00438	2.21462	1.35463	1.14724	0.701021	1.89974	1.46271	1.61906	1.184	2.12648	1.84322	2.12377	1.19579	0.603771	1.79757	0.910484	1.2555	0.656776	1.09503	1.36405	2.0656	1.88818	1.41251	0.910481	1.91377	1.13731
Cell_0033	FOXO_TR	Glucose 17 mM + Glutamine 2.500000e-01 mM + Insulin 10000 ng/ml + EAA 1.000000e-01 X	1.68746	1.63456	2.82423	2.72232	2.87435	1.33725	2.01655	3.17405	2.02338	3.06986	2.35989	2.93603	2.68016	2.06805	1.35293	2.06235	3.22342	2.6619	2.7457	1.29901	2.05975	2.38381	2.11631	2.74254	1.63164	1.6174	2.37528	2.4434	2.94908	1.26003	2.3537	2.08554	3.01015	1.52173	1.87644	2.09637	1.50504	2.35561	1.70981	1.5411	2.92999	2.193	3.13914	1.47967	2.35465	2.08879	2.83406
Cell_0033	AMPKARt2	Glucose 17 mM + Glutamine 2.500000e-01 mM + Insulin 10000 ng/ml + EAA 1.000000e-01 X	0.558964	0.606113	0.662091	0.502974	0.454007	0.651401	0.615102	0.608179	0.393559	0.501367	0.523874	0.424791	0.610099	0.644784	0.553881	0.678489	0.638376	0.495357	0.484779	0.617363	0.670414	0.609811	0.649138	0.647881	0.467479	0.742189	0.554129	0.655503	0.596515	0.590102	0.581933	0.47014	0.589523	0.62175	0.67519	0.587017	0.531609	0.637218	0.565928	0.661249	0.618728	0.465568	0.534677	0.666319	0.637652	0.583656	0.64304
Cell_0034	TFEB_TR	Glucose 17 mM + Glutamine 2.500000e-01 mM + Insulin 10000 ng/ml + EAA 1.000000e-01 X	1.23328	0.735699	2.10843	2.14939	3.32036	1.505	1.37571	2.6244	1.71176	1.61651	1.72326	2.63825	2.20148	0.866509	0.958245	1.57725	2.37724	1.13049	1.24836	1.39082	0.976308	0.958469	2.14133	1.19658	1.24778	0.734262	1.85148	0.995402	1.56849	1.32551	2.08475	1.70949	2.12705	1.26758	0.613884	2.05236	0.883586	1.30258	0.648618	1.09844	1.2987	2.05202	1.82842	1.43013	0.847755	2.0709	1.09962
Cell_0034	FOXO_TR	Glucose 17 mM + Glutamine 2.500000e-01 mM + Insulin 10000 ng/ml + EAA 1.000000e-01 X	1.71835	1.72034	2.78815	2.83773	2.97591	1.25559	1.97435	3.01126	1.95272	2.99507	2.31139	2.88176	2.67594	2.09011	1.52011	1.924	3.32429	2.83539	2.6834	1.28732	2.06951	2.241	2.13885	2.67356	1.62926	1.57045	2.45151	2.44836	3.05909	1.22854	2.29044	1.90403	3.17465	1.48531	1.80787	2.13264	1.47213	2.41278	1.69371	1.55109	2.71334	2.04994	3.11151	1.42421	2.03609	2.26081	3.09847
Cell_0034	AMPKARt2	Glucose 17 mM + Glutamine 2.500000e-01 mM + Insulin 10000 ng/ml + EAA 1.000000e-01 X	0.556532	0.614826	0.653961	0.499638	0.444044	0.658316	0.604762	0.611925	0.40661	0.500968	0.532824	0.432516	0.594716	0.632932	0.575438	0.668554	0.626181	0.496789	0.478616	0.623904	0.670743	0.602513	0.655839	0.652411	0.443243	0.743535	0.569213	0.657516	0.618392	0.588823	0.562705	0.481905	0.587352	0.620743	0.649275	0.564295	0.543419	0.648763	0.594231	0.660924	0.627326	0.444623	0.534792	0.677066	0.531319	0.578368	0.660183
Cell_0035	TFEB_TR	Glucose 17 mM + Glutamine 2.500000e-01 mM + Insulin 10000 ng/ml + EAA 1.000000e-01 X	1.44349	0.739143	2.20505	2.13461	3.74001	1.50899	1.29648	2.13275	1.82934	1.62178	1.88102	0.951894	2.06789	1.16844	1.01687	1.91437	2.11225	1.07934	1.17583	1.31344	0.873776	0.968035	2.19924	1.23903	1.36005	0.787977	1.74601	1.18123	1.71768	1.22077	2.30435	1.72209	2.2174	1.44089	0.655359	1.9866	0.872767	1.214	0.649765	1.09144	1.67234	2.02771	2.02817	1.55268	0.734626	2.08967	1.22512
Cell_0035	FOXO_TR	Glucose 17 mM + Glutamine 2.500000e-01 mM + Insulin 10000 ng/ml + EAA 1.000000e-01 X	1.76899	1.74599	2.76929	2.91477	3.08702	1.26363	1.91038	2.89644	2.0397	2.94212	2.30663	1.7825	2.68386	2.09943	1.94714	1.84623	3.26461	2.82873	2.58117	1.30032	1.98555	2.27124	2.20463	2.69558	1.58036	1.56253	2.52606	2.44724	3.1701	1.27241	2.42925	1.84569	3.18956	1.55789	1.70589	2.10814	1.40844	2.44631	1.67462	1.53095	2.73436	1.9712	3.01582	1.44448	1.53977	2.16952	3.26384
Cell_0035	AMPKARt2	Glucose 17 mM + Glutamine 2.500000e-01 mM + Insulin 10000 ng/ml + EAA 1.000000e-01 X	0.55256	0.622204	0.655082	0.484011	0.448511	0.66665	0.603561	0.624989	0.402345	0.508107	0.544422	0.756014	0.593693	0.61217	0.593683	0.65256	0.625881	0.501549	0.465226	0.61896	0.666591	0.600423	0.624044	0.644223	0.491572	0.737161	0.571883	0.661117	0.618306	0.582111	0.548687	0.480452	0.58615	0.616076	0.644977	0.547363	0.546718	0.648183	0.594965	0.663016	0.631147	0.436168	0.541706	0.683123	0.528807	0.585212	0.69392
Cell_0036	TFEB_TR	Glucose 17 mM + Glutamine 2.500000e-01 mM + Insulin 10000 ng/ml + EAA 1.000000e-01 X	1.22462	0.793226	2.35379	2.11346	4.19836	1.59634	1.17034	3.39121	1.73635	1.59621	1.8344	0.885149	1.97609	1.44407	0.82602	1.77048	1.77059	1.16934	1.25287	1.44175	1.14139	0.967598	2.05227	1.45747	1.33412	0.797355	1.36418	1.78426	1.8782	1.01143	2.44935	1.71384	2.51355	1.35075	0.694822	1.46477	0.862412	1.1224	0.625009	1.11057	1.92359	2.02261	2.13048	1.5654	0.733341	2.05953	1.30993
Cell_0036	FOXO_TR	Glucose 17 mM + Glutamine 2.500000e-01 mM + Insulin 10000 ng/ml + EAA 1.000000e-01 X	1.67151	1.75253	2.74925	2.95864	3.01673	1.2989	1.83852	2.93148	2.08626	2.95111	2.13463	1.79979	2.68664	2.09631	2.1318	1.77015	3.18064	2.82265	2.53138	1.26365	1.90978	2.23292	2.17312	2.81988	1.52986	1.55308	2.63815	2.50921	3.19275	1.21599	2.53543	1.92068	3.09176	1.96354	1.64596	2.13179	1.37239	2.42693	1.62311	1.55231	2.82308	1.98242	3.02298	1.47493	1.38761	2.21419	3.22114
Cell_0036	AMPKARt2	Glucose 17 mM + Glutamine 2.500000e-01 mM + Insulin 10000 ng/ml + EAA 1.000000e-01 X	0.558237	0.589002	0.656839	0.481922	0.457466	0.665737	0.607716	0.626685	0.393642	0.518207	0.541541	0.760249	0.60605	0.632112	0.596732	0.648943	0.625873	0.486552	0.444332	0.624572	0.662402	0.605387	0.620924	0.633741	0.537421	0.708187	0.561567	0.66002	0.610378	0.585432	0.548362	0.468155	0.576092	0.627677	0.643196	0.532028	0.540127	0.629069	0.591055	0.669097	0.631015	0.442097	0.535598	0.674752	0.572674	0.600166	0.692842
Cell_0037	TFEB_TR	Glucose 17 mM + Glutamine 2.500000e-01 mM + Insulin 10000 ng/ml + EAA 1.000000e-01 X	1.03623	0.800697	2.42365	2.10418	4.20807	1.59741	1.23305	4.33506	1.72815	1.60565	1.70278	0.960547	2.09398	1.72133	0.796105	1.62635	1.74624	1.27328	1.16634	1.49754	1.20128	0.939383	1.94907	1.5906	1.2438	0.781331	1.07596	1.72066	1.71099	1.04715	1.03939	1.62888	2.38896	1.42699	0.733628	1.25777	0.835981	1.11899	0.600442	1.13521	1.87425	2.02143	1.96569	1.47738	0.757169	2.15438	1.22511
Cell_0037	FOXO_TR	Glucose 17 mM + Glutamine 2.500000e-01 mM + Insulin 10000 ng/ml + EAA 1.000000e-01 X	1.65621	1.73676	2.72519	3.08367	2.87464	1.31577	1.75154	2.99906	2.06355	3.00172	1.86846	1.81168	2.71946	2.0941	2.02754	1.69608	3.26524	2.8256	2.47681	1.25925	1.85998	2.09122	2.06911	2.88949	1.50141	1.52915	2.71856	2.47972	3.20352	1.12426	2.19491	1.95201	3.0138	2.35994	1.5909	2.20417	1.40252	2.46932	1.58501	1.58677	2.78674	1.97771	3.12105	1.47417	1.51298	2.42908	3.17378
Cell_0037	AMPKARt2	Glucose 17 mM + Glutamine 2.500000e-01 mM + Insulin 10000 ng/ml + EAA 1.000000e-01 X	0.578314	0.547838	0.656421	0.484276	0.458627	0.666451	0.604769	0.616589	0.398137	0.517346	0.533111	0.763783	0.614384	0.662402	0.602268	0.647721	0.621042	0.480734	0.438379	0.633564	0.630018	0.608286	0.649805	0.622127	0.495612	0.695987	0.55645	0.65509	0.595915	0.591227	0.768053	0.46694	0.571502	0.632605	0.630452	0.530759	0.542425	0.629019	0.621944	0.675212	0.629142	0.438142	0.533254	0.672375	0.567837	0.598969	0.676956
Cell_0038	TFEB_TR	Glucose 17 mM + Glutamine 2.500000e-01 mM + Insulin 10000 ng/ml + EAA 1.000000e-01 X	1.25289	0.781874	2.46472	2.09346	3.9738	1.49982	1.33125	3.09307	1.82925	1.64449	1.65724	1.06311	2.21541	1.57319	1.0294	1.75106	1.63491	1.12099	0.978851	1.15136	1.00906	0.933655	2.01149	1.49515	1.16171	0.756412	1.10322	1.12651	1.71368	1.35004	0.765634	1.71216	1.92601	1.64221	0.828737	1.58843	0.84608	1.12164	0.59665	1.13082	1.66546	2.00157	1.9367	1.4132	0.694777	2.3508	1.37785
Cell_0038	FOXO_TR	Glucose 17 mM + Glutamine 2.500000e-01 mM + Insulin 10000 ng/ml + EAA 1.000000e-01 X	2.02824	1.66134	2.69953	3.16209	2.88479	1.29426	1.66984	2.95991	2.07332	3.05042	1.85117	1.78691	2.7656	2.14201	1.95168	1.69959	3.32928	2.7914	2.38346	1.30216	1.75601	2.06877	2.01271	2.73551	1.47422	1.51404	2.71825	2.34274	3.19001	1.12208	2.04104	1.94029	3.0202	2.44898	1.59553	2.17584	1.4495	2.53519	1.58153	1.5635	2.86745	1.93761	3.12579	1.45292	1.46106	2.49376	3.18809
Cell_0038	AMPKARt2	Glucose 17 mM + Glutamine 2.500000e-01 mM + Insulin 10000 ng/ml + EAA 1.000000e-01 X	0.591627	0.537378	0.663158	0.478314	0.458103	0.672604	0.604482	0.619759	0.407707	0.50316	0.539158	0.761232	0.615323	0.667066	0.603841	0.650553	0.622384	0.51335	0.445065	0.626474	0.560439	0.613696	0.646767	0.61168	0.469164	0.720801	0.554102	0.649336	0.579053	0.595531	0.754032	0.471373	0.577462	0.627962	0.634605	0.555947	0.544912	0.643974	0.613099	0.669731	0.620526	0.427859	0.542854	0.686275	0.538855	0.595018	0.676757
Cell_0039	TFEB_TR	Glucose 17 mM + Glutamine 2.500000e-01 mM + Insulin 10000 ng/ml + EAA 1.000000e-01 X	1.29304	0.929088	2.41347	2.08607	4.0156	1.4981	1.29805	2.45483	1.7692	1.65923	1.71475	0.95281	2.14614	1.12762	1.11323	1.6789	1.69635	1.00694	1.13286	1.01482	1.04493	0.961055	2.02273	1.3946	1.16428	0.732506	1.24665	1.04122	1.95923	1.60105	0.646546	1.87928	1.96817	1.46183	0.979816	1.62832	0.88837	1.16621	0.599087	1.12059	1.39098	1.98037	2.1329	1.46901	0.679837	2.46266	1.63091
Cell_0039	FOXO_TR	Glucose 17 mM + Glutamine 2.500000e-01 mM + Insulin 10000 ng/ml + EAA 1.000000e-01 X	2.53433	1.574	2.60047	3.10385	2.91078	1.20676	1.65191	2.88466	2.0733	3.04566	1.90967	1.73653	2.77366	2.23311	1.96651	1.71795	3.28186	2.89669	2.34147	1.35066	1.64168	2.16215	1.99298	2.56615	1.47727	1.48219	2.68744	2.31965	3.18528	1.14166	2.08489	1.95654	3.02816	2.49358	1.70254	2.09916	1.48533	2.47865	1.61843	1.53198	2.97332	1.85997	3.09235	1.43172	1.40305	2.52857	3.13453
Cell_0039	AMPKARt2	Glucose 17 mM + Glutamine 2.500000e-01 mM + Insulin 10000 ng/ml + EAA 1.000000e-01 X	0.577319	0.521406	0.673801	0.481858	0.46077	0.668008	0.611276	0.62874	0.414106	0.500734	0.548004	0.760436	0.626409	0.657337	0.587678	0.658229	0.625879	0.540234	0.450695	0.637443	0.518478	0.611811	0.618965	0.611956	0.489104	0.726836	0.541402	0.644813	0.575042	0.596007	0.713392	0.472375	0.576984	0.638598	0.65681	0.56757	0.547656	0.64066	0.559342	0.658439	0.619567	0.432844	0.53766	0.692908	0.537318	0.611674	0.680662
Cell_0040	TFEB_TR	Glucose 17 mM + Glutamine 2.500000e-01 mM + Insulin 10000 ng/ml + EAA 1.000000e-01 X	1.13612	1.1595	2.10066	2.07894	4.2273	1.58073	1.31004	4.19832	1.50761	1.64849	1.76634	0.777313	2.12272	1.38868	1.06505	1.548	2.11026	1.27174	1.2169	1.23704	1.21328	1.00076	1.95382	1.3615	1.21518	0.735693	1.36267	1.33573	1.91067	1.44358	0.543252	1.81304	2.33893	1.37083	1.11708	1.25713	0.904483	1.21631	0.604995	1.12403	1.25516	1.97313	2.2029	1.63369	0.657351	2.43678	1.4278
Cell_0040	FOXO_TR	Glucose 17 mM + Glutamine 2.500000e-01 mM + Insulin 10000 ng/ml + EAA 1.000000e-01 X	2.83064	1.51892	2.4918	3.0746	2.83383	1.15832	1.66536	2.91572	2.01511	2.99905	1.79574	1.7185	2.76779	2.18553	2.00514	1.6678	3.3119	3.03277	2.38236	1.67738	1.66417	2.25705	1.97559	2.6428	1.50279	1.4909	2.63782	2.37124	3.24058	1.11653	2.08685	1.95244	2.88025	2.58956	1.78546	2.11607	1.51831	2.41029	1.66253	1.54599	2.94865	1.78049	3.17418	1.45908	1.40236	2.66977	2.99952
Cell_0040	AMPKARt2	Glucose 17 mM + Glutamine 2.500000e-01 mM + Insulin 10000 ng/ml + EAA 1.000000e-01 X	0.564488	0.496822	0.667925	0.500309	0.464364	0.664137	0.600835	0.626478	0.41269	0.506112	0.547707	0.764077	0.643979	0.645006	0.572866	0.650769	0.621704	0.536293	0.448801	0.633932	0.541156	0.600953	0.617094	0.611893	0.468532	0.716837	0.528254	0.645193	0.575156	0.588351	0.695838	0.480207	0.569397	0.63889	0.659387	0.569827	0.558468	0.637509	0.560798	0.648607	0.633989	0.445336	0.529252	0.685527	0.560779	0.629213	0.687497
Cell_0041	TFEB_TR	Glucose 17 mM + Glutamine 2.500000e-01 mM + Insulin 10000 ng/ml + EAA 1.000000e-01 X	1.22202	1.14905	1.88477	2.05447	4.09611	1.5748	1.34972	4.68087	1.3732	1.64143	1.68639	0.88101	2.185	1.93565	1.14415	1.60938	1.03461	1.47914	0.973332	1.48116	1.10661	1.04322	1.86357	1.30388	1.16682	0.760678	1.40986	1.29912	1.83688	1.205	0.455863	1.65507	2.30917	1.63797	1.21414	1.18132	0.916611	1.12164	0.607896	1.14816	1.33458	1.94724	2.14249	1.6652	0.562936	2.43329	1.21
Cell_0041	FOXO_TR	Glucose 17 mM + Glutamine 2.500000e-01 mM + Insulin 10000 ng/ml + EAA 1.000000e-01 X	2.96886	1.44268	2.47592	3.11238	2.8054	1.1798	1.67343	3.01389	1.93761	2.97729	1.71554	1.72529	2.81266	2.03972	1.99696	1.61491	1.51435	2.91889	2.39083	2.35925	1.7647	2.35274	1.96576	2.80558	1.46952	1.57887	2.59928	2.34954	3.23897	1.09505	2.01363	1.94101	2.69777	2.54319	1.77402	2.20656	1.52984	2.44405	1.70072	1.55651	2.96775	1.79275	3.27094	1.48379	1.24103	2.71327	2.88323
Cell_0041	AMPKARt2	Glucose 17 mM + Glutamine 2.500000e-01 mM + Insulin 10000 ng/ml + EAA 1.000000e-01 X	0.576794	0.508566	0.654996	0.510006	0.465787	0.678401	0.578302	0.627485	0.407972	0.500249	0.5603	0.765011	0.643536	0.644882	0.574926	0.642567	0.553621	0.53283	0.449977	0.5436	0.566295	0.613268	0.638163	0.607454	0.448499	0.730442	0.535362	0.648957	0.567709	0.585944	0.692294	0.481364	0.584889	0.610957	0.64917	0.593742	0.558437	0.649618	0.592703	0.625416	0.641264	0.451752	0.534885	0.682089	0.619208	0.628497	0.696986
Cell_0042	TFEB_TR	Glucose 17 mM + Glutamine 2.500000e-01 mM + Insulin 10000 ng/ml + EAA 1.000000e-01 X	1.34442	1.01091	1.99257	2.03955	3.60728	1.46013	1.24548	2.57221	1.57825	1.66605	1.63035	1.07738	2.18737	1.68766	1.29072	1.52796	1.58237	1.2505	1.05152	1.55163	0.983557	1.08457	1.75578	1.50599	1.22726	0.780463	1.40708	1.3159	2.12992	1.44582	0.476729	1.67825	2.05992	1.61565	1.29381	1.37449	0.931137	1.00346	0.623105	1.22202	1.4769	1.88593	2.15311	1.5715	0.570892	2.41104	1.49246
Cell_0042	FOXO_TR	Glucose 17 mM + Glutamine 2.500000e-01 mM + Insulin 10000 ng/ml + EAA 1.000000e-01 X	3.02404	1.33927	2.48659	3.14618	2.82546	1.09077	1.72993	3.0704	1.92414	2.98493	1.73688	1.71723	2.88368	2.02327	1.90789	1.62839	1.52695	2.69669	2.35112	2.83164	1.75103	2.40616	1.94614	2.86849	1.43627	1.57942	2.68699	2.34502	3.15131	1.08592	2.00533	1.98513	2.6557	2.52421	1.75158	2.27381	1.49931	2.36627	1.92433	1.53496	3.02623	1.82763	3.2535	1.44932	1.11346	2.70052	2.84296
Cell_0042	AMPKARt2	Glucose 17 mM + Glutamine 2.500000e-01 mM + Insulin 10000 ng/ml + EAA 1.000000e-01 X	0.586159	0.524825	0.661362	0.508389	0.466047	0.687406	0.567428	0.634656	0.416576	0.496766	0.598841	0.768631	0.634118	0.659379	0.576064	0.652404	0.581853	0.5315	0.4675	0.435048	0.566564	0.636649	0.653126	0.610557	0.475862	0.71586	0.547532	0.651121	0.558867	0.59468	0.665542	0.466669	0.627174	0.60777	0.659683	0.596294	0.554135	0.655617	0.585626	0.587423	0.635401	0.45435	0.529081	0.683093	0.684461	0.62515	0.693772
Cell_0043	TFEB_TR	Glucose 17 mM + Glutamine 2.500000e-01 mM + Insulin 10000 ng/ml + EAA 1.000000e-01 X	1.28061	1.04642	2.11047	2.05546	3.2912	1.40033	1.20703	1.39407	1.72008	1.70145	1.69965	0.991196	2.33804	1.17825	1.31838	1.43747	1.28871	1.07521	1.31519	1.26987	1.15863	1.14538	1.70154	1.81171	1.53404	0.770743	1.35687	1.73638	2.35086	1.73149	0.479787	1.74835	1.98493	1.52723	1.36369	0.633533	0.8956	1.00166	0.69721	1.33876	1.73923	1.83453	2.21596	1.60052	0.619475	2.22951	1.67649
Cell_0043	FOXO_TR	Glucose 17 mM + Glutamine 2.500000e-01 mM + Insulin 10000 ng/ml + EAA 1.000000e-01 X	2.98776	1.28142	2.49906	3.19869	2.74292	1.04818	1.80424	3.05133	1.99242	2.97503	1.70746	1.71465	2.88861	2.03873	1.87762	1.68036	1.46219	2.56265	2.37947	2.84916	1.64925	2.38376	1.9046	2.91731	1.51774	1.48439	2.80005	2.39988	3.1305	1.08156	1.9388	2.01314	2.57719	2.73045	1.81295	1.34976	1.43014	2.19243	2.44808	1.51377	3.08262	1.7518	3.18566	1.42771	1.18408	2.75967	2.80002
Cell_0043	AMPKARt2	Glucose 17 mM + Glutamine 2.500000e-01 mM + Insulin 10000 ng/ml + EAA 1.000000e-01 X	0.578351	0.506248	0.663693	0.511458	0.471085	0.679916	0.536467	0.630362	0.42448	0.493437	0.631985	0.776692	0.632083	0.6629	0.568474	0.655299	0.592584	0.522832	0.471721	0.405321	0.583238	0.629096	0.653795	0.61265	0.485887	0.670173	0.537389	0.647265	0.548436	0.594223	0.669618	0.468852	0.65542	0.638612	0.679276	0.647409	0.570944	0.650917	0.561493	0.561344	0.635469	0.447979	0.523773	0.685834	0.669712	0.630553	0.689949
Cell_0044	TFEB_TR	Glucose 17 mM + Glutamine 2.500000e-01 mM + Insulin 10000 ng/ml + EAA 1.000000e-01 X	1.18476	1.09889	2.18205	2.05958	3.35391	1.54903	1.35835	1.98249	1.4975	1.70047	1.68212	0.82133	2.56868	1.18505	1.08113	1.63241	1.16168	1.16831	1.19503	1.12626	1.21873	1.24951	1.69042	1.57312	1.60806	0.772626	1.25826	1.90626	2.21329	1.46281	0.435488	1.71345	1.99053	1.78272	1.43173	0.609301	0.851267	0.967864	0.796308	1.46477	2.01476	1.80255	2.24597	1.61302	0.541502	2.09678	1.41447
Cell_0044	FOXO_TR	Glucose 17 mM + Glutamine 2.500000e-01 mM + Insulin 10000 ng/ml + EAA 1.000000e-01 X	2.96767	1.26705	2.55057	3.20471	2.61188	1.50721	1.79407	2.94465	2.011	2.96006	1.67238	1.71588	2.84632	1.98416	1.92975	1.68802	1.44566	2.45906	2.41632	2.82602	1.59339	2.39483	1.89141	2.95616	1.5799	1.4952	2.6872	2.40503	3.19872	1.10423	1.82442	1.97695	2.4166	2.88774	1.92271	1.37551	1.36587	2.26099	2.924	1.50729	3.1585	1.65866	3.11418	1.43461	1.27682	2.70753	2.71674
Cell_0044	AMPKARt2	Glucose 17 mM + Glutamine 2.500000e-01 mM + Insulin 10000 ng/ml + EAA 1.000000e-01 X	0.574605	0.502266	0.641494	0.512522	0.473466	0.673569	0.466183	0.625156	0.41017	0.478525	0.635714	0.783482	0.626595	0.669792	0.570106	0.646505	0.582229	0.528622	0.437498	0.420815	0.595672	0.607787	0.647825	0.611236	0.477322	0.666539	0.525757	0.640306	0.536545	0.583871	0.707764	0.493465	0.657361	0.638405	0.685052	0.639313	0.589107	0.64916	0.526109	0.557506	0.64251	0.43657	0.539143	0.697423	0.590353	0.637941	0.701431
Cell_0045	TFEB_TR	Glucose 17 mM + Glutamine 2.500000e-01 mM + Insulin 10000 ng/ml + EAA 1.000000e-01 X	1.14929	1.03447	0.870696	2.02938	3.36595	1.81037	1.47545	2.32861	1.3525	1.68334	1.58821	0.882318	2.49044	1.24815	0.773146	1.66714	1.41567	1.11017	1.17832	1.49991	1.04647	1.33095	1.66542	1.1753	1.35029	0.866776	1.23247	1.62062	2.0843	1.11487	0.485322	1.68633	1.93823	1.79448	1.48187	0.595943	0.86162	0.936744	0.84164	1.60304	1.81157	1.75886	2.24596	1.5202	0.478994	2.12517	1.18215
Cell_0045	FOXO_TR	Glucose 17 mM + Glutamine 2.500000e-01 mM + Insulin 10000 ng/ml + EAA 1.000000e-01 X	2.96879	1.2708	1.90643	3.11159	2.54442	2.28695	1.71182	2.84591	1.96296	2.94149	1.69222	1.69914	2.90503	2.02267	1.90822	1.63005	1.54726	2.41028	2.35693	2.85014	1.56128	2.44342	1.94467	2.94419	1.54807	1.53927	2.46635	2.34119	3.28462	1.10749	1.87746	1.948	2.40317	2.81477	1.93617	1.33559	1.37307	2.43217	3.00933	1.51481	3.13406	1.67791	3.01727	1.43475	1.31659	2.5672	2.76661
Cell_0045	AMPKARt2	Glucose 17 mM + Glutamine 2.500000e-01 mM + Insulin 10000 ng/ml + EAA 1.000000e-01 X	0.578144	0.533967	0.550484	0.507395	0.465016	0.65728	0.41534	0.638483	0.401143	0.475444	0.630015	0.783437	0.620011	0.689203	0.577812	0.652959	0.593515	0.549533	0.4157	0.416163	0.572092	0.598634	0.649897	0.620317	0.496337	0.669689	0.535261	0.643134	0.531693	0.581764	0.70427	0.511266	0.652996	0.605201	0.675521	0.657643	0.592411	0.663621	0.497211	0.559112	0.640181	0.43547	0.542391	0.707111	0.53158	0.638853	0.705239
Cell_0046	TFEB_TR	Glucose 17 mM + Glutamine 2.500000e-01 mM + Insulin 10000 ng/ml + EAA 1.000000e-01 X	1.18932	1.01561	0.865419	2.01548	3.18904	2.0017	1.47594	2.12616	1.52513	1.66864	1.57945	1.00341	2.30057	0.965971	0.899937	1.40916	1.22379	0.978021	1.41866	1.61106	1.07031	1.33205	1.66956	1.26223	1.30325	0.995939	1.28807	1.49343	2.15474	1.20521	0.569057	1.72511	1.77171	1.53606	1.45507	0.599007	0.880067	1.07736	0.855418	1.7255	1.40729	1.73669	2.28373	1.5644	0.516817	2.14328	1.18025
Cell_0046	FOXO_TR	Glucose 17 mM + Glutamine 2.500000e-01 mM + Insulin 10000 ng/ml + EAA 1.000000e-01 X	2.89054	1.29241	1.94916	3.04094	2.46556	2.80572	1.61668	2.8558	1.98701	2.8853	1.73305	1.70179	3.0629	2.09412	1.88572	1.59829	1.6185	2.41978	2.3307	2.69793	1.50395	2.3941	1.97266	2.98554	1.70462	1.45913	2.43613	2.27469	3.36211	1.0738	2.02766	1.92636	2.45309	2.73782	1.81925	1.33618	1.4365	2.33779	2.95108	1.52172	3.13693	1.73839	2.94867	1.43345	1.31025	2.57986	2.95237
Cell_0046	AMPKARt2	Glucose 17 mM + Glutamine 2.500000e-01 mM + Insulin 10000 ng/ml + EAA 1.000000e-01 X	0.570508	0.55821	0.542474	0.507096	0.462783	0.619042	0.413243	0.653329	0.412614	0.484579	0.627753	0.759103	0.622548	0.673253	0.576283	0.670954	0.611195	0.559876	0.440865	0.388954	0.558702	0.591676	0.66561	0.628059	0.518926	0.63337	0.542598	0.657988	0.533055	0.583109	0.704078	0.520865	0.637274	0.596947	0.659135	0.670874	0.597084	0.690608	0.527163	0.55733	0.625673	0.435599	0.542671	0.705136	0.503038	0.632293	0.692274
Cell_0047	TFEB_TR	Glucose 17 mM + Glutamine 2.500000e-01 mM + Insulin 10000 ng/ml + EAA 1.000000e-01 X	1.19589	1.0137	0.885502	2.05168	3.19767	2.16268	1.41365	2.09367	1.58692	1.64107	1.58242	0.983883	2.28468	0.739716	1.23189	1.3629	0.953362	1.07611	1.37994	1.31998	1.10729	1.49322	1.63029	1.50574	1.44505	1.09085	1.28764	1.55669	2.1899	1.3779	0.567461	1.69959	1.70218	1.54929	1.38381	0.607236	0.86109	1.17276	0.900996	1.76477	1.60113	1.74156	2.30432	1.62222	0.541243	2.13252	1.26323
Cell_0047	FOXO_TR	Glucose 17 mM + Glutamine 2.500000e-01 mM + Insulin 10000 ng/ml + EAA 1.000000e-01 X	2.83063	1.26866	2.02145	3.05527	2.32554	3.0655	1.53486	2.83465	2.03408	2.87351	1.7655	1.71766	3.13604	2.04114	1.98906	1.58977	1.6117	2.42091	2.42419	2.54379	1.45371	2.10913	1.88831	3.05076	2.10604	1.37332	2.49665	2.24985	3.3408	1.07601	2.06757	1.88469	2.40307	2.78324	1.69219	1.41603	1.45216	2.15278	3.13821	1.49439	3.23002	1.75744	2.95326	1.48035	1.28519	2.63031	3.07166
Cell_0047	AMPKARt2	Glucose 17 mM + Glutamine 2.500000e-01 mM + Insulin 10000 ng/ml + EAA 1.000000e-01 X	0.551146	0.567148	0.545563	0.503856	0.466766	0.585071	0.420492	0.649574	0.413126	0.476724	0.626208	0.716924	0.630073	0.64429	0.575617	0.67662	0.594132	0.554648	0.460361	0.380242	0.56816	0.670497	0.677426	0.624705	0.512616	0.608607	0.538476	0.668995	0.535184	0.587049	0.744371	0.525794	0.61444	0.610881	0.661071	0.661157	0.597905	0.701353	0.556281	0.556853	0.620574	0.431544	0.566485	0.706148	0.511084	0.628464	0.687952
Cell_0048	TFEB_TR	Glucose 17 mM + Glutamine 2.500000e-01 mM + Insulin 10000 ng/ml + EAA 1.000000e-01 X	1.12822	0.971916	0.957133	2.08426	3.38146	2.30166	1.44361	2.55685	1.48592	1.64167	1.55483	0.971771	2.36011	0.77466	1.17046	1.43833	1.16726	1.21346	1.35081	1.34325	0.957172	1.06506	1.53052	1.71101	1.41688	1.22476	1.24647	1.34808	2.1264	1.26854	0.592935	1.55975	1.93539	1.59054	1.40893	0.614221	0.823844	1.05549	0.96926	1.74607	2.05931	1.70158	2.30008	1.56084	0.550169	2.11802	1.3699
Cell_0048	FOXO_TR	Glucose 17 mM + Glutamine 2.500000e-01 mM + Insulin 10000 ng/ml + EAA 1.000000e-01 X	2.88041	1.20765	2.07457	3.10715	2.25981	3.26942	1.50047	2.72414	2.01969	2.96187	1.73453	1.69001	3.12628	2.00756	2.06	1.52061	1.61607	2.54151	2.49215	2.59815	1.4158	2.26675	1.80252	3.03385	2.3993	1.34165	2.38302	2.24293	3.23438	1.11728	2.06307	1.86265	2.43216	2.8662	1.70993	1.46901	1.37551	2.13968	3.46316	1.45598	3.12539	1.77058	2.98172	1.79961	1.32992	2.61633	3.15228
Cell_0048	AMPKARt2	Glucose 17 mM + Glutamine 2.500000e-01 mM + Insulin 10000 ng/ml + EAA 1.000000e-01 X	0.539896	0.569422	0.547969	0.490808	0.453931	0.575595	0.416009	0.640522	0.398462	0.462194	0.639719	0.693672	0.63479	0.649024	0.577092	0.668033	0.587743	0.55216	0.451472	0.405696	0.564322	0.687396	0.667595	0.628981	0.485862	0.607299	0.539168	0.665761	0.534098	0.59898	0.695645	0.520658	0.61031	0.609441	0.679315	0.656449	0.590634	0.693088	0.519894	0.556133	0.633572	0.436391	0.569048	0.712106	0.569462	0.629733	0.686626
Cell_0049	TFEB_TR	Glucose 17 mM + Glutamine 2.500000e-01 mM + Insulin 10000 ng/ml + EAA 1.000000e-01 X	1.23701	0.960875	0.979465	2.06673	3.47047	2.328	1.66995	3.11751	1.60049	1.67251	1.53965	1.08171	2.59897	0.795748	1.08024	1.25339	1.40148	1.26335	1.42243	1.3953	1.10819	1.15504	1.62948	1.88942	1.47414	1.34577	1.28427	1.05908	2.105	1.11712	0.663874	1.47092	2.04797	1.45508	1.54934	0.629942	0.792389	0.955251	1.01187	1.73967	1.13914	1.65965	2.41164	1.75631	0.566492	2.21823	1.46203
Cell_0049	FOXO_TR	Glucose 17 mM + Glutamine 2.500000e-01 mM + Insulin 10000 ng/ml + EAA 1.000000e-01 X	2.9146	1.22498	2.01467	3.13847	2.34708	3.30659	1.49038	2.73362	2.04256	3.01666	1.82504	1.63587	3.14292	2.04382	1.99205	1.46477	1.57708	2.74001	2.46283	2.68326	1.38332	2.39438	1.85443	3.03115	2.55252	1.26134	2.17656	2.18753	3.20804	1.13915	2.11451	1.82215	2.58445	2.94189	1.91429	1.46042	1.28446	2.16559	3.61955	1.45867	1.35456	1.81107	3.01995	2.42537	1.37144	2.7055	3.24999
Cell_0049	AMPKARt2	Glucose 17 mM + Glutamine 2.500000e-01 mM + Insulin 10000 ng/ml + EAA 1.000000e-01 X	0.539955	0.561876	0.549548	0.482223	0.441573	0.585257	0.406738	0.641673	0.396173	0.463515	0.649205	0.686713	0.614497	0.632247	0.570812	0.660593	0.599992	0.564594	0.454218	0.424619	0.568282	0.684446	0.651796	0.646458	0.466524	0.604177	0.54519	0.657428	0.52573	0.59259	0.565776	0.518751	0.610244	0.598036	0.669751	0.661064	0.594702	0.6915	0.522591	0.553663	0.644354	0.438861	0.546373	0.708359	0.613116	0.628605	0.667673
Cell_0050	TFEB_TR	Glucose 17 mM + Glutamine 2.500000e-01 mM + Insulin 10000 ng/ml + EAA 1.000000e-01 X	1.42394	0.934177	0.929781	2.02617	3.4563	2.36523	1.75066	3.04128	1.70207	1.65729	1.629	1.15092	2.80598	0.827277	1.28206	1.19329	1.35677	1.27701	1.18109	1.16047	1.41596	1.26559	1.85643	1.87359	1.75394	1.35104	1.43282	0.995034	2.24564	1.14145	0.674805	1.49159	1.93964	1.46514	1.62815	0.641617	0.78313	0.943318	1.01015	1.73857	1.34864	1.69899	2.38097	2.1177	0.558324	2.54394	1.45829
Cell_0050	FOXO_TR	Glucose 17 mM + Glutamine 2.500000e-01 mM + Insulin 10000 ng/ml + EAA 1.000000e-01 X	2.90834	1.29089	1.88986	3.09176	2.44893	3.22843	1.45517	2.86578	2.07738	2.99169	2.34559	1.57858	3.06769	1.98059	1.93974	1.44632	1.49686	2.73193	2.44309	2.63487	1.37696	2.43102	1.9753	3.08498	2.81367	1.16351	2.10151	2.0999	3.24404	1.10717	2.12211	1.72577	2.63422	2.96113	2.06605	1.45275	1.25965	2.08133	3.59576	1.48697	1.34172	1.85451	3.10113	2.88369	1.36547	2.74826	3.2959
Cell_0050	AMPKARt2	Glucose 17 mM + Glutamine 2.500000e-01 mM + Insulin 10000 ng/ml + EAA 1.000000e-01 X	0.533454	0.565087	0.55557	0.482897	0.453676	0.595448	0.409646	0.647046	0.408725	0.471421	0.597868	0.668065	0.573463	0.598332	0.567616	0.664317	0.584221	0.575156	0.459701	0.423389	0.598303	0.674208	0.654243	0.663641	0.470954	0.605604	0.556044	0.659777	0.515325	0.573949	0.539045	0.520858	0.597939	0.594145	0.64397	0.651793	0.600908	0.689028	0.620657	0.554661	0.655273	0.429429	0.554031	0.702315	0.599151	0.629686	0.654541
Cell_0051	TFEB_TR	Glucose 17 mM + Glutamine 2.500000e-01 mM + Insulin 10000 ng/ml + EAA 1.000000e-01 X	1.28486	0.98221	0.939446	1.99317	3.36407	2.42234	1.57057	1.86621	1.47295	1.61609	1.95227	1.15429	2.72304	1.09498	1.33822	1.5275	1.29759	1.16823	1.33801	1.1645	1.24112	1.18414	1.86133	1.94787	1.74395	1.39605	1.52581	0.955632	2.49978	1.09277	0.84211	1.46219	2.0764	1.53154	1.56589	0.632878	0.790877	0.906926	0.988232	1.75082	1.37674	1.72221	2.19947	2.04497	0.581633	2.66315	1.34108
Cell_0051	FOXO_TR	Glucose 17 mM + Glutamine 2.500000e-01 mM + Insulin 10000 ng/ml + EAA 1.000000e-01 X	3.00187	1.28354	1.8193	3.02573	2.45554	3.2221	1.43437	1.77444	2.02755	3.02394	3.02509	1.50994	2.87613	1.87322	1.98231	1.36934	1.53391	2.60251	2.47591	2.49057	1.37636	2.3607	2.00778	3.08291	3.04908	1.12391	2.11682	2.04606	3.25421	1.11678	2.12523	1.69118	2.56452	2.93947	2.00052	1.46787	1.27378	1.96603	3.53233	1.51749	1.34224	1.86897	3.14311	2.95665	1.45279	2.56413	3.34321
Cell_0051	AMPKARt2	Glucose 17 mM + Glutamine 2.500000e-01 mM + Insulin 10000 ng/ml + EAA 1.000000e-01 X	0.521725	0.574917	0.561406	0.484904	0.465552	0.591193	0.444976	0.673137	0.413837	0.477345	0.497686	0.644201	0.563452	0.62057	0.561524	0.679763	0.57573	0.568403	0.43735	0.426615	0.613683	0.675831	0.662741	0.666914	0.473363	0.609762	0.568005	0.670306	0.508357	0.594172	0.59227	0.512917	0.597747	0.5944	0.652623	0.637861	0.590219	0.672176	0.666356	0.552147	0.66196	0.425745	0.577833	0.701959	0.572104	0.631706	0.663249
Cell_0052	TFEB_TR	Glucose 17 mM + Glutamine 2.500000e-01 mM + Insulin 10000 ng/ml + EAA 1.000000e-01 X	1.06891	1.15944	0.972875	2.00513	3.34301	2.32168	1.52435	1.19316	1.33475	1.63746	2.18557	1.33026	2.78641	1.33184	1.30042	1.58755	1.31714	1.10689	2.00225	1.31019	0.936589	1.13407	1.77474	2.05974	1.42372	1.5455	1.37674	0.98486	2.29986	1.05143	1.23283	1.39654	2.11749	1.40106	1.54708	0.627734	0.787411	0.935859	0.970867	1.80804	1.23752	1.67353	2.52636	1.83498	0.66346	2.39287	1.35729
Cell_0052	FOXO_TR	Glucose 17 mM + Glutamine 2.500000e-01 mM + Insulin 10000 ng/ml + EAA 1.000000e-01 X	3.14739	1.22682	1.79992	3.03359	2.48456	3.24135	1.44485	1.82978	2.00893	3.15564	3.32363	1.47699	2.82222	1.8779	1.98874	1.35557	1.60857	2.57972	2.5173	2.31376	1.35922	2.31095	1.91604	3.05962	3.07971	1.11721	2.07487	2.01188	3.27195	1.44495	2.24464	1.77193	2.5171	3.00927	1.94067	1.46982	1.2537	1.98618	3.49568	1.55212	1.38552	1.87061	3.0543	3.00836	1.55736	2.4796	3.36456
Cell_0052	AMPKARt2	Glucose 17 mM + Glutamine 2.500000e-01 mM + Insulin 10000 ng/ml + EAA 1.000000e-01 X	0.519998	0.564886	0.565624	0.484705	0.46266	0.590225	0.483265	0.662752	0.405675	0.483982	0.430029	0.634279	0.587801	0.647622	0.543652	0.695387	0.605262	0.563736	0.419304	0.430822	0.607021	0.683675	0.667253	0.655545	0.46078	0.620023	0.565162	0.667527	0.497986	0.625236	0.587716	0.505016	0.60541	0.594119	0.66976	0.643382	0.58155	0.664651	0.582319	0.541438	0.666104	0.427683	0.583332	0.692007	0.56979	0.623477	0.670154
Cell_0053	TFEB_TR	Glucose 17 mM + Glutamine 2.500000e-01 mM + Insulin 10000 ng/ml + EAA 1.000000e-01 X	1.23188	1.11877	0.941814	2.04987	3.57865	2.29016	1.54244	1.3058	1.4867	1.71659	1.96249	1.54306	2.92375	1.18229	1.35761	1.17734	1.26528	1.27535	1.82194	1.2016	0.999993	1.07504	1.76627	1.88255	1.39567	1.60653	0.691614	1.20894	1.82579	1.47283	1.47546	1.44026	1.81947	1.33338	1.6568	0.635857	0.765892	1.07998	0.968744	1.84307	1.19763	1.67767	3.00956	2.17818	0.731221	2.26768	1.54433
Cell_0053	FOXO_TR	Glucose 17 mM + Glutamine 2.500000e-01 mM + Insulin 10000 ng/ml + EAA 1.000000e-01 X	3.11868	1.21555	1.82045	3.05605	2.61096	3.22777	1.42837	1.85512	2.06204	3.26724	3.26569	1.48991	2.93209	1.93239	1.91439	1.43619	1.54286	2.57239	2.55552	2.2198	1.33203	2.33508	1.79898	3.11093	3.12264	1.12948	1.575	1.9638	3.27986	2.05212	2.28499	1.86969	2.49192	3.10648	1.95864	1.45868	1.20406	2.12545	3.51522	1.55996	1.44631	1.90191	2.97345	3.22567	1.5174	2.56761	3.24941
Cell_0053	AMPKARt2	Glucose 17 mM + Glutamine 2.500000e-01 mM + Insulin 10000 ng/ml + EAA 1.000000e-01 X	0.519929	0.565096	0.556358	0.485204	0.463405	0.607126	0.486237	0.65471	0.404617	0.487305	0.428375	0.642293	0.600946	0.634601	0.547256	0.693588	0.615626	0.567802	0.430143	0.439251	0.608227	0.684512	0.686009	0.651845	0.466776	0.639153	0.691046	0.650097	0.487651	0.605004	0.567964	0.506892	0.601658	0.593637	0.660672	0.659085	0.585111	0.675642	0.496463	0.536628	0.666811	0.428842	0.585176	0.675666	0.584665	0.615134	0.671103
Cell_0054	TFEB_TR	Glucose 17 mM + Glutamine 2.500000e-01 mM + Insulin 10000 ng/ml + EAA 1.000000e-01 X	1.46749	0.849798	0.961702	2.01399	3.86466	2.50818	1.41767	1.40331	1.57084	1.78659	1.73294	1.45266	2.56796	0.967338	1.19712	1.05925	1.11156	1.32244	1.2716	1.16478	1.04069	1.11584	1.68631	1.93336	1.62052	1.58168	0.720905	1.45669	2.45541	1.74653	1.67046	1.50903	1.91411	1.52098	1.68488	0.636287	0.751113	1.17119	0.999303	1.81588	1.34173	1.7276	2.9142	2.60912	0.770835	2.28053	1.45966
Cell_0054	FOXO_TR	Glucose 17 mM + Glutamine 2.500000e-01 mM + Insulin 10000 ng/ml + EAA 1.000000e-01 X	2.95749	1.24035	1.88347	3.05408	2.69034	3.23561	1.39683	1.89819	2.06808	3.22989	3.12012	1.46684	2.99428	1.94765	1.93136	1.37146	1.44106	2.56548	2.52363	2.27368	1.25988	2.34896	1.80519	3.16877	3.21748	1.14767	1.62034	1.92798	3.29241	2.40944	2.1214	1.94132	2.44579	3.05327	1.88658	1.46485	1.19426	2.18671	3.58813	1.53484	1.43226	1.92247	3.01983	3.4377	1.46554	2.40307	3.14151
Cell_0054	AMPKARt2	Glucose 17 mM + Glutamine 2.500000e-01 mM + Insulin 10000 ng/ml + EAA 1.000000e-01 X	0.513933	0.587016	0.528724	0.4877	0.469295	0.613786	0.485172	0.658026	0.414044	0.488616	0.44986	0.654494	0.597283	0.637846	0.572974	0.693457	0.578463	0.556682	0.438375	0.457497	0.614647	0.676992	0.704294	0.658997	0.486809	0.642888	0.725144	0.64594	0.496449	0.572068	0.586037	0.51096	0.606777	0.596461	0.665006	0.663395	0.581561	0.681234	0.484853	0.531116	0.669243	0.440849	0.588064	0.671361	0.585394	0.618179	0.674081
Cell_0055	TFEB_TR	Glucose 17 mM + Glutamine 2.500000e-01 mM + Insulin 10000 ng/ml + EAA 1.000000e-01 X	1.40076	0.787688	1.02871	1.93807	4.02033	2.62674	1.51148	1.13613	1.56916	1.81181	1.85493	1.30332	2.30147	1.16746	0.998337	1.29566	0.980962	1.20286	1.7253	1.3276	0.890364	1.27991	1.6586	2.26736	1.67349	1.59631	0.763928	1.63153	3.52998	1.29989	2.07038	1.47922	2.22841	1.59433	1.57123	0.638042	0.764808	1.11105	1.04427	1.7989	1.38694	1.70467	2.85113	2.47322	0.790341	1.00258	1.22008
Cell_0055	FOXO_TR	Glucose 17 mM + Glutamine 2.500000e-01 mM + Insulin 10000 ng/ml + EAA 1.000000e-01 X	2.96797	1.2242	1.8719	3.06647	2.68905	3.30126	1.39582	1.91723	2.07254	3.05512	2.95731	1.40279	2.9984	1.92856	2.08877	1.41934	1.38837	2.69035	2.38317	2.31174	1.17687	2.37085	1.96325	3.15257	3.13525	1.13089	1.61837	1.94461	3.3308	2.37831	2.01265	1.95454	2.42948	2.95774	1.7673	1.44528	1.23846	2.17312	3.67401	1.50773	1.36875	1.86265	3.06017	3.50131	1.4902	1.20644	3.18159
Cell_0055	AMPKARt2	Glucose 17 mM + Glutamine 2.500000e-01 mM + Insulin 10000 ng/ml + EAA 1.000000e-01 X	0.515622	0.58467	0.521917	0.484666	0.470717	0.595952	0.502906	0.672619	0.4153	0.498371	0.458209	0.651971	0.591804	0.640199	0.571135	0.716167	0.540802	0.539593	0.430531	0.453715	0.612623	0.670673	0.690045	0.650345	0.488333	0.640936	0.697958	0.662209	0.512855	0.570584	0.591065	0.516101	0.620653	0.603568	0.690858	0.649257	0.573593	0.672916	0.479969	0.516004	0.675239	0.455539	0.593188	0.670494	0.569121	0.580173	0.670336
Cell_0056	TFEB_TR	Glucose 17 mM + Glutamine 2.500000e-01 mM + Insulin 10000 ng/ml + EAA 1.000000e-01 X	1.27655	0.908658	0.965242	1.96364	4.05748	2.60374	1.80722	1.18954	1.57639	1.79094	1.91855	1.35071	2.64636	1.46344	1.11649	1.30702	0.912973	1.39283	2.15169	1.37197	0.909812	1.28516	1.74718	2.38992	1.61431	1.57101	0.773961	1.44843	2.97001	1.52507	2.32384	1.44521	2.07161	1.41109	1.53272	0.6471	0.79337	0.997601	1.06121	1.78847	1.22561	1.65824	2.89037	2.20254	0.761097	0.97037	1.29872
Cell_0056	FOXO_TR	Glucose 17 mM + Glutamine 2.500000e-01 mM + Insulin 10000 ng/ml + EAA 1.000000e-01 X	3.12428	1.21353	1.75084	3.00484	2.72461	3.37382	1.39777	1.89106	2.09861	2.90954	2.88349	1.37468	3.01949	1.9049	2.1732	2.04748	1.28869	2.80935	2.32083	2.24295	1.18772	2.38291	2.07615	3.1107	3.05545	1.09994	1.59897	2.00372	3.22885	2.37969	2.07209	1.88467	2.48505	2.99569	1.65536	1.36837	1.28023	2.19958	3.73447	1.46627	1.39711	1.78786	3.0753	3.38805	1.4778	1.21564	3.27398
Cell_0056	AMPKARt2	Glucose 17 mM + Glutamine 2.500000e-01 mM + Insulin 10000 ng/ml + EAA 1.000000e-01 X	0.520327	0.574644	0.559372	0.483758	0.465843	0.578815	0.517114	0.682489	0.412123	0.515687	0.464775	0.645346	0.587973	0.617824	0.545228	0.708073	0.539004	0.549166	0.427207	0.432928	0.60337	0.67835	0.664354	0.630479	0.487623	0.655655	0.695541	0.674884	0.501496	0.569458	0.58253	0.521898	0.616647	0.605503	0.695078	0.62397	0.575311	0.663752	0.469307	0.520361	0.676388	0.457982	0.609163	0.665581	0.578217	0.572357	0.670974
Cell_0057	TFEB_TR	Glucose 17 mM + Glutamine 2.500000e-01 mM + Insulin 10000 ng/ml + EAA 1.000000e-01 X	1.26806	0.992116	0.868644	1.97858	3.85037	2.72534	1.77319	1.38628	1.43674	1.73457	1.84708	1.38478	1.4345	1.3099	1.22057	1.19743	0.895129	1.60955	1.62464	1.32268	1.02462	1.24471	1.70916	2.62101	1.53917	1.44405	0.728115	1.08466	1.79861	2.73298	2.47051	1.49946	1.89056	1.40842	1.62726	0.628328	0.807586	0.990379	1.07001	1.74268	1.11452	1.64341	2.40941	2.17241	0.736898	1.01084	1.3692
Cell_0057	FOXO_TR	Glucose 17 mM + Glutamine 2.500000e-01 mM + Insulin 10000 ng/ml + EAA 1.000000e-01 X	3.1429	1.27326	1.71481	2.84091	2.7258	3.3468	1.36991	1.90283	2.00764	2.88335	2.93085	1.37253	2.4228	1.93122	2.11301	2.81428	1.18188	2.74868	2.4477	2.26087	1.20763	2.28053	2.03685	3.12279	3.19939	1.0909	1.57917	2.03996	2.97676	2.4945	2.10966	1.90205	2.54602	3.07633	1.68136	1.32571	1.29554	2.19722	3.72534	1.41849	1.46595	1.77022	3.18727	3.21643	1.42549	1.24211	3.36034
Cell_0057	AMPKARt2	Glucose 17 mM + Glutamine 2.500000e-01 mM + Insulin 10000 ng/ml + EAA 1.000000e-01 X	0.512083	0.587293	0.589748	0.501904	0.453071	0.574836	0.5322	0.681518	0.417738	0.528069	0.475252	0.648393	0.687579	0.635976	0.54482	0.650348	0.553134	0.570839	0.427804	0.437628	0.594634	0.686987	0.661547	0.625816	0.49277	0.662099	0.716623	0.673447	0.479368	0.561814	0.583938	0.522466	0.605588	0.604297	0.683474	0.611142	0.576646	0.663004	0.496794	0.540262	0.677879	0.45865	0.612646	0.662822	0.60357	0.568167	0.685339
Cell_0058	TFEB_TR	Glucose 17 mM + Glutamine 2.500000e-01 mM + Insulin 10000 ng/ml + EAA 1.000000e-01 X	1.24532	1.07803	0.914764	1.88658	3.54044	2.91446	1.54924	1.21861	1.33803	1.67674	1.92995	1.4494	1.48485	0.9869	1.10072	1.20556	0.997411	1.36999	1.28141	1.3113	0.96007	1.29737	1.6735	2.79952	1.58339	1.30604	0.705043	1.45658	1.92815	2.70779	2.78912	1.56241	1.85724	1.58329	1.74692	0.591699	0.808849	1.11877	1.09138	1.73197	1.21253	1.59628	2.26786	2.15789	0.774906	1.04044	1.23978
Cell_0058	FOXO_TR	Glucose 17 mM + Glutamine 2.500000e-01 mM + Insulin 10000 ng/ml + EAA 1.000000e-01 X	3.09032	1.25078	1.80177	2.76816	2.58731	3.31174	1.33006	1.96819	1.89109	2.90061	2.93692	1.34138	2.48698	1.97452	2.06127	3.06468	1.16409	2.66207	2.56982	2.4351	1.1443	2.16175	2.04411	3.17311	3.24323	1.08313	1.55292	2.03514	2.83044	2.49931	2.05442	2.03704	2.57207	3.09001	2.16556	1.36978	1.30121	2.18139	3.63511	1.40308	1.42622	1.74255	3.29686	3.15941	1.40285	1.23706	3.45287
Cell_0058	AMPKARt2	Glucose 17 mM + Glutamine 2.500000e-01 mM + Insulin 10000 ng/ml + EAA 1.000000e-01 X	0.502529	0.587281	0.571128	0.519024	0.440736	0.57699	0.546348	0.677334	0.425654	0.53023	0.476155	0.645404	0.673879	0.682259	0.576801	0.633911	0.557756	0.567773	0.417785	0.453339	0.597789	0.670629	0.671969	0.633164	0.482962	0.657498	0.695039	0.666259	0.493318	0.567778	0.573952	0.516349	0.611104	0.613049	0.672721	0.617322	0.578827	0.66442	0.507257	0.535707	0.683518	0.456138	0.592419	0.648545	0.597181	0.558958	0.68651
Cell_0059	TFEB_TR	Glucose 17 mM + Glutamine 2.500000e-01 mM + Insulin 10000 ng/ml + EAA 1.000000e-01 X	1.22492	1.03899	0.947395	1.84943	3.39419	2.99112	1.58784	1.14509	1.64491	1.65219	1.92424	1.61981	1.46493	0.915491	1.0697	1.27182	1.14505	1.31488	1.46562	1.26217	0.856479	1.21457	1.76365	2.46682	2.0198	1.23166	0.762216	2.10063	2.42442	1.69156	2.80101	1.21605	1.68588	1.55602	1.87186	0.614875	0.815769	1.24034	1.08967	1.76916	1.4125	1.54457	2.80626	2.212	0.817153	1.11136	1.3157
Cell_0059	FOXO_TR	Glucose 17 mM + Glutamine 2.500000e-01 mM + Insulin 10000 ng/ml + EAA 1.000000e-01 X	3.09681	1.20947	1.75718	2.80654	2.40464	3.40651	1.31503	2.09792	1.93974	2.91278	2.89792	1.31703	2.44084	1.96413	2.03428	3.00906	1.17148	2.67935	2.56889	2.56368	1.11494	2.15698	2.12262	3.18529	3.08728	1.06108	1.55413	2.04347	2.85486	2.44782	2.01111	2.49892	2.63508	3.09139	2.88183	1.43907	1.29472	2.25787	3.57443	1.38735	1.3866	1.69524	3.33237	3.18407	1.43381	1.25649	3.46446
Cell_0059	AMPKARt2	Glucose 17 mM + Glutamine 2.500000e-01 mM + Insulin 10000 ng/ml + EAA 1.000000e-01 X	0.503639	0.588526	0.540286	0.516925	0.440029	0.58608	0.542786	0.672202	0.428074	0.528223	0.479521	0.644129	0.680746	0.686367	0.603969	0.680915	0.557492	0.547468	0.405189	0.449283	0.600964	0.647889	0.673363	0.635964	0.473388	0.666183	0.68515	0.66092	0.529409	0.574311	0.563652	0.627968	0.628717	0.617442	0.640195	0.618061	0.599391	0.657454	0.465597	0.524074	0.677868	0.44064	0.579909	0.624434	0.583678	0.555651	0.672
Cell_0060	TFEB_TR	Glucose 17 mM + Glutamine 2.500000e-01 mM + Insulin 10000 ng/ml + EAA 1.000000e-01 X	1.24733	0.890083	0.896977	1.88866	3.1949	2.76233	1.64042	1.33121	2.06046	1.64121	1.68121	1.57974	1.45242	0.963405	1.20479	1.55523	1.13464	1.75659	1.39505	1.25703	0.939824	1.10354	1.74605	2.34394	2.33158	1.20967	0.821997	1.76153	2.34949	2.31207	2.52455	1.131	1.79184	1.52337	1.98996	0.708466	0.826493	1.24318	1.07141	1.76022	1.51637	1.55186	2.84318	2.34945	0.854962	1.20492	1.3858
Cell_0060	FOXO_TR	Glucose 17 mM + Glutamine 2.500000e-01 mM + Insulin 10000 ng/ml + EAA 1.000000e-01 X	3.024	1.54477	1.56499	2.777	2.26363	3.42853	1.31292	2.29902	2.00804	2.91077	2.87991	1.33098	2.36208	1.9965	1.95953	3.00503	1.15307	2.70809	2.55597	2.60712	1.09696	2.20452	2.04207	3.17527	3.09952	1.04704	1.59923	2.05337	2.90133	2.40153	1.98884	2.57156	2.69083	3.11839	3.3029	1.47895	1.27627	2.27981	3.63951	1.36817	1.45859	1.70804	3.40917	3.19778	1.53912	1.2894	3.34352
Cell_0060	AMPKARt2	Glucose 17 mM + Glutamine 2.500000e-01 mM + Insulin 10000 ng/ml + EAA 1.000000e-01 X	0.505475	0.612859	0.530317	0.519184	0.447049	0.594731	0.54914	0.672358	0.424977	0.526414	0.493428	0.670857	0.688718	0.666396	0.600997	0.710753	0.556686	0.539871	0.399526	0.454496	0.59293	0.647001	0.668607	0.631459	0.477048	0.669905	0.711635	0.662579	0.541607	0.573819	0.581092	0.624452	0.633957	0.604702	0.596222	0.613432	0.620078	0.652968	0.475978	0.535904	0.658581	0.434857	0.588152	0.620321	0.590198	0.563332	0.671204
Cell_0061	TFEB_TR	Glucose 17 mM + Glutamine 2.500000e-01 mM + Insulin 10000 ng/ml + EAA 1.000000e-01 X	1.29623	1.01353	0.967877	1.86182	2.94819	2.30408	1.47144	1.26315	1.9941	1.64066	1.66081	1.34914	1.3693	1.05273	1.14985	1.83311	1.02215	1.87907	1.29031	1.3228	1.16222	1.1542	1.69311	2.41239	1.93637	1.15962	0.822383	1.03011	2.31603	3.77709	2.63923	1.33538	2.01147	1.66328	2.10203	0.775806	0.829986	1.16453	1.06131	1.71249	1.41036	1.56358	2.64925	2.26436	0.921637	1.2532	1.20125
Cell_0061	FOXO_TR	Glucose 17 mM + Glutamine 2.500000e-01 mM + Insulin 10000 ng/ml + EAA 1.000000e-01 X	2.98493	2.07053	1.49995	2.73379	2.21201	3.28533	1.27325	2.45321	1.93747	2.87888	2.81982	1.31325	2.22988	2.12318	1.87877	2.97668	1.14425	2.74762	2.5734	2.70007	1.10945	2.22736	1.94041	3.18319	3.23892	1.06513	1.63126	2.00418	2.89997	2.2977	1.91207	2.5227	2.61624	3.1467	3.47265	1.46235	1.25655	2.12665	3.68777	1.37413	1.48478	1.74672	3.46742	3.29521	1.64872	1.30462	3.24885
Cell_0061	AMPKARt2	Glucose 17 mM + Glutamine 2.500000e-01 mM + Insulin 10000 ng/ml + EAA 1.000000e-01 X	0.502305	0.588876	0.527102	0.528802	0.454836	0.584033	0.570341	0.681733	0.417579	0.521458	0.494685	0.704672	0.68971	0.659877	0.581985	0.707229	0.554724	0.544259	0.397388	0.481335	0.604777	0.64771	0.669458	0.628057	0.476841	0.661126	0.712045	0.667972	0.527827	0.575541	0.603582	0.620127	0.616546	0.610266	0.586251	0.62097	0.612108	0.662776	0.553498	0.550595	0.645357	0.447489	0.595477	0.625957	0.585076	0.563916	0.682631
Cell_0062	TFEB_TR	Glucose 17 mM + Glutamine 2.500000e-01 mM + Insulin 10000 ng/ml + EAA 1.000000e-01 X	1.36328	1.27908	1.13419	1.78532	2.98384	2.3402	1.43501	1.14658	1.60386	1.69217	1.91454	1.26237	1.18459	1.12291	0.906115	1.54573	1.02045	1.55805	1.59714	1.22052	1.26871	1.16548	1.71032	1.95334	1.56018	1.1037	0.815525	1.00718	2.44805	3.4924	2.82523	1.51911	1.88141	1.79044	2.23426	0.771969	0.830289	1.11505	1.03827	1.69128	1.2711	1.54717	2.90587	2.09129	0.926902	1.36741	1.18865
Cell_0062	FOXO_TR	Glucose 17 mM + Glutamine 2.500000e-01 mM + Insulin 10000 ng/ml + EAA 1.000000e-01 X	3.20877	2.21139	1.58654	2.77134	2.29305	3.22072	1.24128	2.54594	1.86325	2.8873	2.83394	1.26227	2.0937	2.18075	1.84568	2.91888	1.14473	2.7532	2.56606	2.77693	1.52084	2.18765	2.04296	3.13851	3.28169	1.08294	1.60309	1.92189	2.90218	2.26453	1.85718	2.45474	2.54069	3.14968	3.55737	1.43815	1.23324	1.99013	3.60287	1.31844	1.4102	1.75368	3.39979	3.41486	1.66809	1.37093	3.28769
Cell_0062	AMPKARt2	Glucose 17 mM + Glutamine 2.500000e-01 mM + Insulin 10000 ng/ml + EAA 1.000000e-01 X	0.501002	0.523124	0.528337	0.528416	0.45673	0.565557	0.566861	0.678892	0.40966	0.510609	0.48466	0.712403	0.688027	0.663593	0.572359	0.698295	0.550249	0.543003	0.405302	0.47382	0.630367	0.632434	0.672648	0.62926	0.475127	0.660847	0.701733	0.673286	0.521222	0.573571	0.606002	0.620636	0.603664	0.647311	0.610607	0.623068	0.593801	0.674837	0.575468	0.553173	0.652627	0.448982	0.591929	0.616967	0.576173	0.55411	0.690195
Cell_0063	TFEB_TR	Glucose 17 mM + Glutamine 2.500000e-01 mM + Insulin 10000 ng/ml + EAA 1.000000e-01 X	1.35116	1.25418	1.2389	1.72741	2.99023	2.78151	1.54042	1.38655	1.44173	1.74636	1.92943	1.31626	1.17103	1.01175	1.11375	1.08361	1.13584	1.33437	1.77319	1.22146	1.22177	1.14288	1.68982	1.76368	1.81902	1.15389	0.817275	1.33881	2.30357	2.22341	2.62638	1.42308	1.9121	1.94458	2.27678	0.77261	0.83142	1.14063	1.02296	1.69135	1.31056	1.54139	2.66281	2.09979	0.847938	1.48191	1.31085
Cell_0063	FOXO_TR	Glucose 17 mM + Glutamine 2.500000e-01 mM + Insulin 10000 ng/ml + EAA 1.000000e-01 X	3.4368	2.11803	1.66579	2.73333	2.37077	3.19998	1.25579	2.6476	1.83781	2.93457	3.01553	1.26788	2.15603	2.12968	1.89603	2.9406	1.13611	2.81163	2.5561	2.7761	2.25126	2.11676	2.12469	3.05626	3.36029	1.05633	1.5594	1.86613	2.91289	2.37133	1.91889	2.4704	2.59894	3.1031	3.58184	1.4941	1.22383	1.97931	3.55629	1.29887	1.37255	1.76371	3.28519	3.28575	1.63564	1.32553	3.29413
Cell_0063	AMPKARt2	Glucose 17 mM + Glutamine 2.500000e-01 mM + Insulin 10000 ng/ml + EAA 1.000000e-01 X	0.512486	0.519407	0.537389	0.529481	0.445651	0.567043	0.547473	0.647332	0.405012	0.498025	0.482638	0.701599	0.675715	0.671552	0.576124	0.67818	0.536885	0.671866	0.420623	0.439733	0.612526	0.615262	0.671494	0.623419	0.483378	0.658256	0.721587	0.682345	0.539765	0.56001	0.602427	0.62211	0.607535	0.663518	0.631172	0.608984	0.593591	0.681965	0.540441	0.551479	0.671277	0.442028	0.596308	0.615652	0.586492	0.545129	0.691992
Cell_0064	TFEB_TR	Glucose 17 mM + Glutamine 2.500000e-01 mM + Insulin 10000 ng/ml + EAA 1.000000e-01 X	1.38474	1.14879	1.33438	1.69286	2.79563	2.62688	1.45493	1.5705	1.50261	1.75003	1.76675	1.33662	1.36248	0.928158	1.67367	1.18061	1.26385	1.19046	1.60819	1.62405	1.30263	1.2598	1.81042	2.08836	2.00805	1.18813	0.805636	1.30559	1.917	2.18609	2.5105	1.37231	2.07082	1.97259	2.20895	0.804802	0.829054	1.16873	1.03638	1.72197	1.35985	1.55622	2.10898	2.10181	0.815082	1.58235	1.24973
Cell_0064	FOXO_TR	Glucose 17 mM + Glutamine 2.500000e-01 mM + Insulin 10000 ng/ml + EAA 1.000000e-01 X	3.38961	2.16049	1.68069	2.5942	2.30939	3.10336	1.21939	2.60065	1.76383	2.8664	3.07464	1.28496	2.27344	2.1167	1.99311	2.98301	1.11291	2.77629	2.58878	2.84555	2.69569	2.11389	2.10162	3.06931	3.4091	1.052	1.55618	1.85624	2.81885	2.46514	1.96327	2.49157	2.612	3.04703	3.68407	1.52505	1.25519	1.96763	3.57926	1.67059	1.36272	1.77762	3.21321	3.10023	1.60229	1.26169	3.22348
Cell_0064	AMPKARt2	Glucose 17 mM + Glutamine 2.500000e-01 mM + Insulin 10000 ng/ml + EAA 1.000000e-01 X	0.535217	0.551377	0.54065	0.532709	0.431989	0.580142	0.550686	0.604816	0.404171	0.49214	0.472967	0.696469	0.664265	0.676638	0.584373	0.6623	0.532992	0.664411	0.422586	0.463311	0.571813	0.601951	0.66718	0.611271	0.501154	0.654856	0.727632	0.687167	0.556344	0.541055	0.61084	0.624888	0.60626	0.647344	0.63464	0.605906	0.602629	0.682353	0.527754	0.548476	0.677146	0.448564	0.616357	0.628598	0.585134	0.559886	0.687038
Cell_0065	TFEB_TR	Glucose 17 mM + Glutamine 2.500000e-01 mM + Insulin 10000 ng/ml + EAA 1.000000e-01 X	1.58305	1.29926	1.43459	1.71334	2.90091	2.20067	1.38175	1.45193	1.5533	1.78623	1.84386	1.22596	1.43957	1.04097	1.5689	1.44472	1.30625	1.34883	1.62078	1.67363	1.3835	1.34635	2.02211	1.93086	1.71015	1.08185	0.824477	0.976177	1.90643	3.28718	2.56037	1.4915	1.92593	1.67688	2.23316	0.776997	1.44714	1.1736	1.03581	1.81983	1.28988	1.585	2.53592	2.04739	0.835013	1.8711	1.27794
Cell_0065	FOXO_TR	Glucose 17 mM + Glutamine 2.500000e-01 mM + Insulin 10000 ng/ml + EAA 1.000000e-01 X	3.24823	2.17569	1.6187	2.54649	2.20887	3.12011	1.24431	2.32421	1.72716	2.7086	2.91147	1.24571	2.17786	2.15084	1.98209	2.98568	1.08125	2.70998	2.65642	2.8885	2.79565	2.13181	2.13728	3.13653	3.23988	1.08031	1.57488	1.89245	2.70568	2.53909	1.89459	2.41306	2.50435	3.03786	3.7244	1.38886	2.77863	1.94874	3.51612	2.33978	1.32054	1.78205	3.29308	3.22625	1.57519	1.76155	3.23876
Cell_0065	AMPKARt2	Glucose 17 mM + Glutamine 2.500000e-01 mM + Insulin 10000 ng/ml + EAA 1.000000e-01 X	0.548421	0.532915	0.531797	0.52297	0.430087	0.585891	0.576929	0.575044	0.408174	0.493318	0.446683	0.705077	0.668633	0.675181	0.584092	0.669818	0.553912	0.667801	0.415749	0.508626	0.574766	0.594872	0.666376	0.612719	0.517381	0.669179	0.68733	0.678586	0.54217	0.530788	0.626013	0.635318	0.603286	0.64815	0.631945	0.623184	0.642951	0.676087	0.525659	0.544106	0.66532	0.452552	0.624619	0.627443	0.572605	0.60504	0.684988
Cell_0066	TFEB_TR	Glucose 17 mM + Glutamine 2.500000e-01 mM + Insulin 10000 ng/ml + EAA 1.000000e-01 X	1.5475	1.4855	1.51094	1.77292	3.12357	2.34549	1.50296	1.36509	1.55515	1.85717	1.95126	1.06575	1.35294	1.28728	1.121	1.23673	1.14169	1.43257	1.63963	1.37614	1.11119	1.22786	1.96896	1.82876	1.66112	1.04717	0.858435	1.01319	2.33141	3.84215	2.47125	1.51427	1.90754	1.48433	2.32766	0.705207	1.35948	1.15173	1.04923	1.95664	1.28944	1.61671	3.11551	2.16118	0.82626	2.16645	1.42427
Cell_0066	FOXO_TR	Glucose 17 mM + Glutamine 2.500000e-01 mM + Insulin 10000 ng/ml + EAA 1.000000e-01 X	3.20288	2.11076	1.63413	2.59424	2.20071	3.15995	1.61737	2.06469	1.8151	2.65886	2.80845	1.23502	2.04534	2.15972	1.87575	2.98661	1.09853	2.69336	2.73097	2.65758	2.83249	2.08479	2.1387	3.15373	3.09862	1.02546	1.58239	1.91684	2.80754	2.64635	1.82493	2.32434	2.4725	3.0607	3.53356	1.2342	2.75426	2.01949	3.51489	2.76504	1.30599	1.82285	3.45444	3.35048	1.60101	2.49009	3.25394
Cell_0066	AMPKARt2	Glucose 17 mM + Glutamine 2.500000e-01 mM + Insulin 10000 ng/ml + EAA 1.000000e-01 X	0.54638	0.504593	0.50576	0.513792	0.433222	0.589497	0.580293	0.562313	0.419091	0.492069	0.438063	0.7097	0.676365	0.670892	0.568815	0.672619	0.574283	0.682133	0.414013	0.48427	0.59969	0.599517	0.670783	0.622011	0.514733	0.680659	0.648246	0.668594	0.523994	0.531819	0.630244	0.63843	0.610318	0.661807	0.620864	0.642071	0.694384	0.67889	0.526648	0.533758	0.656735	0.450977	0.613807	0.621835	0.583858	0.613409	0.692425
Cell_0067	TFEB_TR	Glucose 17 mM + Glutamine 2.500000e-01 mM + Insulin 10000 ng/ml + EAA 1.000000e-01 X	1.2686	1.40408	1.64399	0.647439	3.01917	2.54376	1.54899	1.38295	1.46867	1.84765	1.88084	1.11606	1.33859	1.57352	1.44727	1.05748	0.952427	1.30817	1.42841	1.86985	0.799819	1.11859	1.91333	2.23819	2.12027	1.14428	0.85875	1.55504	2.41949	3.15032	2.46078	1.51323	1.95103	1.55962	2.2176	0.737636	1.34173	1.05829	1.12047	2.06485	1.35258	1.63989	2.76522	2.35633	0.806305	2.25428	1.3498
Cell_0067	FOXO_TR	Glucose 17 mM + Glutamine 2.500000e-01 mM + Insulin 10000 ng/ml + EAA 1.000000e-01 X	3.21322	2.13252	1.86206	1.57341	2.27773	3.01311	2.15332	1.91894	1.88688	2.71419	2.82877	1.25954	2.08472	2.16115	1.84192	2.98932	1.17378	2.74707	2.73454	2.39525	2.78084	2.04412	2.15768	3.14813	3.1277	1.05079	1.56409	1.87557	2.97088	2.6979	1.78875	2.36149	2.54354	3.09708	3.36018	1.24292	2.4819	2.10792	3.64997	2.82214	1.30467	1.88206	3.3452	3.17805	1.61794	2.45402	3.14718
Cell_0067	AMPKARt2	Glucose 17 mM + Glutamine 2.500000e-01 mM + Insulin 10000 ng/ml + EAA 1.000000e-01 X	0.544264	0.511707	0.477746	0.61841	0.43508	0.59912	0.517703	0.556893	0.423963	0.490719	0.45659	0.701112	0.680865	0.664859	0.557982	0.660296	0.582989	0.689855	0.407195	0.452369	0.593814	0.602499	0.657088	0.619397	0.508689	0.684246	0.646517	0.668138	0.530199	0.526472	0.624128	0.625574	0.615846	0.653079	0.601646	0.650235	0.674128	0.681311	0.561892	0.523964	0.661356	0.458057	0.613507	0.63309	0.602302	0.545492	0.695078
Cell_0068	TFEB_TR	Glucose 17 mM + Glutamine 2.500000e-01 mM + Insulin 10000 ng/ml + EAA 1.000000e-01 X	1.35801	1.18124	1.79322	0.645716	2.9499	2.39194	1.58071	1.30521	1.42844	1.7991	1.8801	1.29341	1.46231	1.41299	1.7829	1.42684	1.08629	1.25148	1.56463	2.4358	0.81056	1.28438	2.12271	2.1607	2.23386	1.15787	0.920114	1.72277	2.40721	2.51566	2.53744	1.58484	1.68022	1.54567	1.91777	0.818161	1.37044	1.07265	1.17907	2.10794	1.34118	1.67439	2.44351	2.37947	0.79522	2.17036	1.28876
Cell_0068	FOXO_TR	Glucose 17 mM + Glutamine 2.500000e-01 mM + Insulin 10000 ng/ml + EAA 1.000000e-01 X	3.20731	2.14316	2.01893	1.56095	2.33583	3.00344	2.41183	1.74375	1.88753	2.71892	2.86133	1.25962	2.17353	2.13816	1.87947	2.96461	1.20047	2.77481	2.66061	2.44063	2.73689	2.02188	2.35338	3.08721	3.12904	1.43607	1.51534	1.84357	2.95871	2.73397	1.70043	2.42552	2.56005	3.12521	3.2557	1.32116	2.33912	2.09929	3.62809	2.79584	1.25822	1.87576	3.08462	3.08954	1.47192	1.86911	3.08201
Cell_0068	AMPKARt2	Glucose 17 mM + Glutamine 2.500000e-01 mM + Insulin 10000 ng/ml + EAA 1.000000e-01 X	0.545104	0.512155	0.482344	0.632004	0.442342	0.611503	0.432361	0.548986	0.409096	0.493779	0.464916	0.699276	0.681984	0.65573	0.565744	0.656845	0.585713	0.687545	0.397008	0.482855	0.578116	0.597491	0.623172	0.617632	0.514796	0.677732	0.650376	0.675225	0.539632	0.510416	0.627313	0.619595	0.618344	0.64313	0.594503	0.646679	0.675587	0.671085	0.602615	0.529044	0.66322	0.451129	0.621759	0.644216	0.609908	0.485273	0.693807
Cell_0069	TFEB_TR	Glucose 17 mM + Glutamine 2.500000e-01 mM + Insulin 10000 ng/ml + EAA 1.000000e-01 X	1.63925	1.1425	1.86687	0.636809	3.00876	2.36036	1.73214	1.16268	1.49704	1.82352	1.87614	1.27052	1.56591	0.892119	1.25913	1.66644	1.25365	1.24663	1.8735	1.95107	0.946692	1.52271	1.22903	2.01599	1.92442	1.15348	1.08032	1.3127	2.74503	3.05453	2.42311	1.55465	1.57468	1.50826	1.81595	0.787011	1.37364	1.25313	1.20608	2.10038	1.32391	1.72283	2.63899	2.22233	0.79936	1.77461	1.41828
Cell_0069	FOXO_TR	Glucose 17 mM + Glutamine 2.500000e-01 mM + Insulin 10000 ng/ml + EAA 1.000000e-01 X	3.12025	2.12132	1.88095	1.53785	2.28436	3.23364	2.42223	1.57234	1.87598	2.65578	2.88375	1.28429	2.25923	2.07259	1.90557	2.92289	1.15475	2.68256	2.68273	2.59747	2.86854	1.9514	2.07221	2.99272	3.12754	1.98108	1.47175	1.85806	2.92486	2.83329	1.55641	2.44721	2.49576	3.13526	3.12046	1.33053	2.43461	2.03328	3.50225	2.80395	1.2259	1.81354	3.11987	3.19322	1.3578	1.49827	3.11144
Cell_0069	AMPKARt2	Glucose 17 mM + Glutamine 2.500000e-01 mM + Insulin 10000 ng/ml + EAA 1.000000e-01 X	0.546077	0.500628	0.492761	0.624238	0.447851	0.615584	0.395951	0.536098	0.401032	0.48507	0.459757	0.703575	0.668284	0.64267	0.571763	0.657831	0.577629	0.690314	0.3971	0.523389	0.592415	0.600449	0.619067	0.627793	0.502802	0.616996	0.638081	0.683834	0.536028	0.500311	0.639861	0.62748	0.614367	0.650384	0.596629	0.642603	0.693315	0.67821	0.604777	0.533976	0.652514	0.430672	0.616483	0.64927	0.624862	0.48727	0.696701
Cell_0070	TFEB_TR	Glucose 17 mM + Glutamine 2.500000e-01 mM + Insulin 10000 ng/ml + EAA 1.000000e-01 X	1.46325	1.2808	1.89357	0.628258	2.93532	2.50965	1.71312	1.23524	1.38698	1.89252	1.74434	1.20781	1.56767	1.05377	1.06003	1.41831	1.03517	1.18139	1.80677	1.64365	1.07105	1.46682	1.08771	2.40239	2.02804	1.27831	1.27736	1.23618	2.53084	3.35586	2.28242	1.47964	1.75235	1.62827	2.04535	0.772594	1.32429	1.23598	1.24262	2.08277	1.33412	1.74724	2.59602	2.00557	0.83468	1.30839	1.30859
Cell_0070	FOXO_TR	Glucose 17 mM + Glutamine 2.500000e-01 mM + Insulin 10000 ng/ml + EAA 1.000000e-01 X	2.96631	2.21492	1.66711	1.52397	2.18448	3.23139	2.42716	1.50484	1.77987	2.65067	2.85042	1.28971	2.39585	2.03353	1.88796	2.89679	1.12741	2.53905	2.81111	2.64976	3.02166	1.88733	1.91824	3.04151	3.19038	2.394	1.45638	1.80808	2.95792	2.86754	1.4702	2.51966	2.4335	3.18012	3.17976	1.30013	2.44493	2.02922	3.53176	2.82821	1.22978	1.7749	3.22654	3.1815	1.68938	1.31183	3.09695
Cell_0070	AMPKARt2	Glucose 17 mM + Glutamine 2.500000e-01 mM + Insulin 10000 ng/ml + EAA 1.000000e-01 X	0.548769	0.505487	0.471777	0.626458	0.439528	0.611211	0.395283	0.51955	0.416516	0.466351	0.471498	0.703935	0.63997	0.635756	0.565165	0.651694	0.579656	0.695559	0.398607	0.550795	0.61723	0.607145	0.645377	0.634109	0.482786	0.538158	0.64002	0.685058	0.532351	0.497449	0.641384	0.628286	0.597882	0.652449	0.586883	0.647987	0.663295	0.691011	0.591973	0.525934	0.64733	0.43307	0.611124	0.661156	0.632105	0.495464	0.692147
Cell_0071	TFEB_TR	Glucose 17 mM + Glutamine 2.500000e-01 mM + Insulin 10000 ng/ml + EAA 1.000000e-01 X	1.14858	1.36894	1.84805	0.6375	2.91815	2.60289	1.56119	1.52286	1.2949	1.95646	1.71956	1.30603	1.56111	1.6117	1.51346	1.38553	0.873096	1.10883	1.92606	2.03564	1.1641	1.22214	1.08633	2.12003	2.2666	1.41011	1.56391	1.4508	1.92923	2.49325	2.25844	1.41376	1.89152	1.66966	2.16014	0.875445	1.26355	1.10483	1.23452	2.05176	1.37479	1.36315	2.30168	1.93733	0.865097	1.35833	1.13759
Cell_0071	FOXO_TR	Glucose 17 mM + Glutamine 2.500000e-01 mM + Insulin 10000 ng/ml + EAA 1.000000e-01 X	2.89677	2.31852	1.51996	1.52744	2.16487	2.96575	2.43626	1.44519	1.64332	2.76067	2.80664	1.26196	2.45313	1.99661	1.82046	2.87247	1.12853	2.50135	2.83429	2.7201	3.10916	1.87055	1.92699	3.16211	3.23085	2.74767	1.44337	1.69326	2.95299	2.83275	1.49209	2.52384	2.42247	3.23384	3.3367	1.27942	2.41134	2.12302	3.50245	2.83352	1.22841	1.18661	3.08735	3.15473	2.34109	1.1659	2.99445
Cell_0071	AMPKARt2	Glucose 17 mM + Glutamine 2.500000e-01 mM + Insulin 10000 ng/ml + EAA 1.000000e-01 X	0.548549	0.502001	0.471666	0.645454	0.433137	0.612309	0.392031	0.50746	0.416918	0.467015	0.490758	0.715168	0.603106	0.642272	0.560288	0.648174	0.598336	0.696378	0.391512	0.577749	0.617426	0.605237	0.642819	0.63985	0.502602	0.52703	0.661101	0.682638	0.538388	0.496392	0.627971	0.616925	0.592823	0.650498	0.575032	0.653289	0.661847	0.678169	0.608376	0.524192	0.657272	0.528925	0.618832	0.667178	0.590023	0.4782	0.686243
Cell_0072	TFEB_TR	Glucose 17 mM + Glutamine 2.500000e-01 mM + Insulin 10000 ng/ml + EAA 1.000000e-01 X	1.26029	1.46048	1.73174	0.649682	2.93587	2.58344	1.55732	1.5632	1.53444	1.99713	1.74175	1.27658	1.55724	1.41045	1.29661	1.52849	1.04787	1.07503	2.22678	2.06236	1.16336	1.08587	1.12898	1.43783	2.19227	1.53687	1.80045	1.32387	2.07359	2.69173	2.2993	1.31874	2.03878	1.53661	1.95583	0.888255	1.25397	1.25522	1.18494	1.98252	1.46205	1.44916	2.12639	2.24602	0.917329	1.83215	1.41405
Cell_0072	FOXO_TR	Glucose 17 mM + Glutamine 2.500000e-01 mM + Insulin 10000 ng/ml + EAA 1.000000e-01 X	2.94887	2.34047	1.38574	1.52341	2.23494	2.81897	2.413	1.3316	1.63078	2.87334	2.85954	1.43482	2.30535	1.91511	1.77127	2.83592	1.12376	2.49677	2.74562	2.76208	3.16378	1.82967	2.03843	3.1745	3.35046	2.98722	1.42258	1.63514	2.94175	2.87184	1.45123	2.34726	2.43154	3.22331	3.20853	1.2381	2.47129	2.181	3.29737	2.73771	1.24461	1.16038	2.99019	3.2524	2.78733	1.13237	2.88412
Cell_0072	AMPKARt2	Glucose 17 mM + Glutamine 2.500000e-01 mM + Insulin 10000 ng/ml + EAA 1.000000e-01 X	0.546897	0.48195	0.515742	0.652156	0.443988	0.613462	0.391995	0.50718	0.402594	0.484596	0.50037	0.714698	0.564571	0.652292	0.55538	0.642647	0.5999	0.699166	0.381303	0.584815	0.605002	0.609062	0.660401	0.656495	0.533812	0.544648	0.661958	0.688986	0.551362	0.501866	0.624935	0.607566	0.60184	0.656003	0.569269	0.652726	0.700313	0.674618	0.638166	0.526823	0.662652	0.534058	0.628161	0.661947	0.510399	0.459872	0.694834
Cell_0073	TFEB_TR	Glucose 17 mM + Glutamine 2.500000e-01 mM + Insulin 10000 ng/ml + EAA 1.000000e-01 X	1.49253	1.65124	1.66762	0.641904	2.86544	2.40617	1.58237	1.31712	1.24853	1.98165	1.65265	1.15852	1.57797	1.1558	0.83145	1.27763	1.03951	1.11457	1.89645	1.93414	1.13104	1.1337	1.12097	1.74107	2.4877	1.70357	1.7346	1.14238	2.21376	4.27934	2.49426	1.39475	1.95164	1.49898	1.86888	0.791159	1.24443	1.37217	1.19445	1.93003	1.4437	1.58042	1.97143	2.57778	1.06136	2.18807	1.49951
Cell_0073	FOXO_TR	Glucose 17 mM + Glutamine 2.500000e-01 mM + Insulin 10000 ng/ml + EAA 1.000000e-01 X	2.96095	2.43124	1.30862	1.5055	2.30585	2.83732	2.37937	1.26784	2.02824	2.88884	2.95021	1.83094	2.05819	1.93205	1.75618	2.86611	1.1131	2.40726	2.64417	2.62938	3.08128	1.73529	2.08106	3.14855	3.51132	2.90628	1.38892	1.61099	2.93666	2.89242	1.34959	2.19771	2.36959	3.1786	3.03423	1.17863	2.44693	2.11026	3.24712	2.60669	1.24595	1.15398	3.03421	3.2599	2.89547	1.09958	2.90107
Cell_0073	AMPKARt2	Glucose 17 mM + Glutamine 2.500000e-01 mM + Insulin 10000 ng/ml + EAA 1.000000e-01 X	0.552645	0.483057	0.527655	0.65096	0.453984	0.6051	0.416555	0.507976	0.498878	0.494666	0.515788	0.666966	0.54963	0.653849	0.546753	0.636264	0.592677	0.700803	0.380664	0.577694	0.601137	0.61254	0.674942	0.666426	0.529376	0.53642	0.641012	0.696483	0.558763	0.504531	0.652425	0.603684	0.599086	0.649053	0.556712	0.653559	0.691458	0.676261	0.638008	0.513612	0.659288	0.534262	0.632763	0.665911	0.46623	0.441443	0.700979
Cell_0074	TFEB_TR	Glucose 17 mM + Glutamine 2.500000e-01 mM + Insulin 10000 ng/ml + EAA 1.000000e-01 X	1.48098	1.73459	1.67708	0.638398	2.93738	2.34114	1.65284	1.23214	1.16524	1.97382	1.66398	1.29987	1.76033	1.72949	1.28361	1.19043	0.902644	1.16756	1.31029	1.98619	1.06181	1.28175	1.13802	2.10063	2.97313	1.7291	1.62913	0.992545	1.74449	4.12955	2.80525	1.55391	1.58607	1.68785	1.94251	0.778669	1.18504	1.19109	1.23404	1.93626	1.39076	1.54805	1.93761	2.38314	1.21287	2.03854	1.03593
Cell_0074	FOXO_TR	Glucose 17 mM + Glutamine 2.500000e-01 mM + Insulin 10000 ng/ml + EAA 1.000000e-01 X	2.88736	2.57753	1.28678	1.49914	2.30885	2.92094	2.36635	1.28802	2.09452	2.87433	3.00277	2.20366	1.86841	2.0905	1.73138	2.96474	1.09691	2.35513	2.54179	2.5666	2.93685	1.64818	2.05665	3.09774	3.44118	2.70334	1.33428	1.56169	2.90466	2.81632	1.62195	2.17457	2.24548	3.14305	3.08865	1.12419	2.37155	2.05072	3.41234	2.58659	1.17139	1.17234	3.03069	3.17748	2.87836	1.03576	2.97662
Cell_0074	AMPKARt2	Glucose 17 mM + Glutamine 2.500000e-01 mM + Insulin 10000 ng/ml + EAA 1.000000e-01 X	0.558806	0.501527	0.49763	0.659257	0.45022	0.60282	0.466841	0.506847	0.496782	0.498796	0.530971	0.614985	0.561224	0.634517	0.553565	0.647973	0.595295	0.699602	0.397052	0.564833	0.598355	0.59421	0.651949	0.663459	0.512077	0.550045	0.635439	0.692363	0.554653	0.492174	0.669378	0.596347	0.601978	0.630423	0.548739	0.653446	0.675403	0.651522	0.619888	0.502507	0.662912	0.543535	0.633114	0.668329	0.497886	0.412614	0.691489
Cell_0075	TFEB_TR	Glucose 17 mM + Glutamine 2.500000e-01 mM + Insulin 10000 ng/ml + EAA 1.000000e-01 X	1.41807	1.57492	1.69037	0.65371	2.97713	2.70621	1.9157	1.24457	1.36947	2.04306	1.84487	1.45635	1.92713	2.08927	1.64045	1.65743	1.06195	1.1177	1.27086	1.75352	1.04032	1.34826	1.2457	1.67492	2.73645	1.63786	1.74664	0.695631	1.9093	2.46242	3.05753	1.56531	1.64187	1.93682	1.83714	0.809404	1.23073	1.07562	1.22193	1.9275	1.58176	1.41523	2.02294	2.17625	1.23346	1.47018	1.04561
Cell_0075	FOXO_TR	Glucose 17 mM + Glutamine 2.500000e-01 mM + Insulin 10000 ng/ml + EAA 1.000000e-01 X	2.84667	2.60025	1.26379	1.50744	2.30432	2.98962	2.41998	1.3138	2.01396	2.88253	3.01058	2.49418	1.7505	2.15929	1.75921	2.98917	1.09015	2.34151	2.5346	2.72932	2.93098	1.6411	2.06328	3.02344	3.29591	2.71036	1.29988	1.23389	2.91214	2.78938	2.33779	2.18881	2.22484	3.18439	3.04375	1.05811	2.50665	2.09843	3.51417	2.60926	1.10642	1.16278	3.06861	3.15085	2.86122	1.02868	2.893
Cell_0075	AMPKARt2	Glucose 17 mM + Glutamine 2.500000e-01 mM + Insulin 10000 ng/ml + EAA 1.000000e-01 X	0.551661	0.51192	0.502094	0.663956	0.446724	0.611235	0.499868	0.517381	0.517676	0.502555	0.524682	0.608474	0.564674	0.605325	0.571695	0.659673	0.581331	0.695322	0.404972	0.545551	0.592316	0.586219	0.651753	0.663097	0.504806	0.589622	0.648492	0.678097	0.554122	0.477867	0.619511	0.590736	0.614612	0.63142	0.557379	0.651776	0.698581	0.65353	0.612397	0.513561	0.669499	0.561141	0.633226	0.651304	0.55052	0.400087	0.68261
Cell_0076	TFEB_TR	Glucose 17 mM + Glutamine 2.500000e-01 mM + Insulin 10000 ng/ml + EAA 1.000000e-01 X	1.37204	1.29191	1.666	0.655725	2.77709	3.04688	2.06857	1.16692	1.44329	2.07349	1.99135	1.41556	1.85333	1.65054	1.36825	1.83688	1.10507	1.03793	1.90952	1.59909	1.28254	1.32703	1.36643	1.5755	2.23108	1.62817	1.78203	0.743052	2.6905	2.0949	3.04635	1.63746	2.13631	2.06793	1.83387	0.801513	1.34729	1.06537	1.20311	1.88706	1.76633	1.47949	1.89696	2.56093	1.12682	1.17089	1.52705
Cell_0076	FOXO_TR	Glucose 17 mM + Glutamine 2.500000e-01 mM + Insulin 10000 ng/ml + EAA 1.000000e-01 X	2.83645	2.49862	1.27204	1.49979	2.40575	2.87912	2.49252	1.30911	1.83739	2.83779	2.92678	2.6833	1.66135	2.04224	1.82989	2.95444	1.04795	2.24133	2.61039	2.76883	2.97926	1.67257	2.0717	3.07638	3.31271	2.83002	1.30997	1.31132	2.93551	2.78052	2.864	2.20866	2.33979	3.29168	2.89767	1.05545	2.72368	2.149	3.46608	2.57874	1.11154	1.12373	3.15189	3.09337	2.86808	1.02083	2.75105
Cell_0076	AMPKARt2	Glucose 17 mM + Glutamine 2.500000e-01 mM + Insulin 10000 ng/ml + EAA 1.000000e-01 X	0.539135	0.5223	0.528842	0.660667	0.451518	0.615749	0.490974	0.526458	0.519855	0.501399	0.523274	0.627757	0.558523	0.605751	0.571805	0.651379	0.565681	0.661657	0.391685	0.550209	0.585505	0.61263	0.680411	0.659258	0.502817	0.600771	0.657126	0.687392	0.56402	0.476254	0.54689	0.596323	0.59724	0.643037	0.565546	0.658944	0.690269	0.689868	0.602998	0.522672	0.668208	0.558339	0.635104	0.644227	0.56363	0.428162	0.683162
Cell_0077	TFEB_TR	Glucose 17 mM + Glutamine 2.500000e-01 mM + Insulin 10000 ng/ml + EAA 1.000000e-01 X	1.23057	1.05308	1.61237	0.643918	2.75684	2.67447	1.96882	1.23969	1.35135	1.99048	2.00932	1.48196	1.74889	1.36677	1.41171	1.51334	0.916471	1.05441	2.79453	1.75558	1.48036	1.30537	1.34272	1.89142	2.16042	1.59177	1.60312	0.674821	2.61913	2.50211	2.98954	1.70648	2.29658	1.9771	2.06902	0.807359	1.28501	1.0191	1.21784	1.87609	1.60288	1.62308	1.93502	2.82799	1.05961	1.26732	1.32518
Cell_0077	FOXO_TR	Glucose 17 mM + Glutamine 2.500000e-01 mM + Insulin 10000 ng/ml + EAA 1.000000e-01 X	2.79404	2.4273	1.27574	1.47582	2.52214	2.62537	2.51375	1.28163	1.7137	2.74332	2.77227	2.7169	1.62475	1.91066	1.83948	2.96577	0.997156	2.17615	2.6332	2.62078	2.97267	1.61022	2.06208	3.12443	3.26788	2.81802	1.31647	1.36451	2.92281	2.66771	2.86679	2.11549	2.37505	3.23982	2.95371	1.13195	2.70796	2.14238	3.3802	2.55649	1.10411	1.12218	3.08466	3.01602	2.88074	0.981295	2.31378
Cell_0077	AMPKARt2	Glucose 17 mM + Glutamine 2.500000e-01 mM + Insulin 10000 ng/ml + EAA 1.000000e-01 X	0.53826	0.53922	0.521609	0.662453	0.459297	0.611486	0.480955	0.520232	0.504981	0.500136	0.560086	0.642979	0.571301	0.631554	0.561785	0.649224	0.587292	0.59782	0.403535	0.564457	0.577303	0.628808	0.680281	0.64845	0.512586	0.593713	0.654771	0.682534	0.56738	0.480705	0.536443	0.594796	0.581988	0.639817	0.568953	0.667287	0.646757	0.694128	0.590366	0.51684	0.660981	0.547079	0.629613	0.655521	0.55004	0.461881	0.694025
Cell_0078	TFEB_TR	Glucose 17 mM + Glutamine 2.500000e-01 mM + Insulin 10000 ng/ml + EAA 1.000000e-01 X	1.14822	1.05445	1.61147	0.649471	2.98621	2.05213	1.86113	1.3789	1.38209	1.91324	1.94862	1.57596	1.74082	1.57467	1.11961	1.3438	1.09102	1.12241	2.75153	1.76975	1.23933	1.15263	1.15109	1.81379	2.31596	1.53067	1.45235	0.601849	1.92465	2.51786	3.65493	1.56074	1.98842	1.76753	1.98111	0.79606	1.19929	1.08769	1.21479	1.85671	1.45316	1.5669	2.51577	2.53106	1.16769	1.11074	1.37077
Cell_0078	FOXO_TR	Glucose 17 mM + Glutamine 2.500000e-01 mM + Insulin 10000 ng/ml + EAA 1.000000e-01 X	2.80733	2.47013	1.28378	1.48164	2.48618	2.45443	2.52785	1.27001	1.68865	2.69743	2.68794	2.748	1.66171	1.8774	1.83366	2.94564	1.23418	2.1828	2.66221	2.68873	2.97061	1.47291	2.10876	2.98906	3.09965	2.75734	1.29998	1.33822	2.96382	2.58298	2.76609	1.89065	2.28925	3.09152	2.97762	1.10245	2.55878	2.12133	3.32578	2.54166	1.06566	1.14552	2.96212	3.02218	2.89291	0.969434	2.1612
Cell_0078	AMPKARt2	Glucose 17 mM + Glutamine 2.500000e-01 mM + Insulin 10000 ng/ml + EAA 1.000000e-01 X	0.543361	0.552784	0.514448	0.642274	0.463599	0.596823	0.483056	0.524039	0.526623	0.500796	0.603843	0.644986	0.586836	0.641695	0.568861	0.658685	0.614493	0.554357	0.440467	0.544658	0.577632	0.613833	0.663556	0.651787	0.523681	0.595393	0.647829	0.685619	0.562473	0.479023	0.573633	0.576896	0.60726	0.638706	0.579959	0.661922	0.630105	0.677865	0.588128	0.520445	0.655657	0.561991	0.621431	0.651708	0.536195	0.464175	0.690489
Cell_0079	TFEB_TR	Glucose 17 mM + Glutamine 2.500000e-01 mM + Insulin 10000 ng/ml + EAA 1.000000e-01 X	1.2141	1.27183	1.64274	0.659096	3.05274	2.25213	1.78007	1.26118	1.30636	1.89311	1.86846	1.53006	1.74678	0.60867	0.646239	1.37559	1.32246	1.16092	1.67973	1.82286	0.992421	1.02406	1.05326	1.56174	2.58501	1.6747	1.39974	0.613709	1.84746	2.68468	4.44572	1.53273	1.73106	1.79389	1.63786	0.770962	1.30195	1.15472	1.1864	1.81177	1.63626	1.47595	2.82259	2.29675	1.26977	0.934779	1.49992
Cell_0079	FOXO_TR	Glucose 17 mM + Glutamine 2.500000e-01 mM + Insulin 10000 ng/ml + EAA 1.000000e-01 X	2.89186	2.50636	1.35913	1.50724	2.38022	2.40591	2.51324	1.31801	1.74045	2.69388	2.7283	2.85867	1.72648	1.25222	1.83154	2.89366	1.81354	2.0623	2.69666	2.90189	2.9222	1.39575	2.20438	2.91451	3.02838	2.81592	1.28235	1.29754	3.0436	2.58033	2.95913	1.78703	2.30234	3.17273	2.89238	1.08404	2.51736	2.10583	3.29892	2.49449	1.07406	1.15407	2.95523	2.98849	2.92401	0.985212	2.25358
Cell_0079	AMPKARt2	Glucose 17 mM + Glutamine 2.500000e-01 mM + Insulin 10000 ng/ml + EAA 1.000000e-01 X	0.541226	0.550478	0.525599	0.575219	0.463549	0.580133	0.475355	0.542637	0.556885	0.497793	0.608904	0.634202	0.577454	0.633138	0.581139	0.65757	0.617989	0.546981	0.43522	0.525897	0.58266	0.599531	0.66057	0.667232	0.515509	0.595219	0.651029	0.706452	0.565319	0.476496	0.598008	0.568166	0.606984	0.641273	0.594114	0.657492	0.621545	0.672899	0.583635	0.532878	0.660932	0.569135	0.624454	0.642317	0.523335	0.457076	0.685295
Cell_0080	TFEB_TR	Glucose 17 mM + Glutamine 2.500000e-01 mM + Insulin 10000 ng/ml + EAA 1.000000e-01 X	1.28623	1.33056	1.62504	0.644651	2.9987	2.77074	1.76696	1.06097	1.15902	1.88266	1.8327	1.67492	1.8109	0.678076	1.96978	1.443	1.05542	1.26458	1.3162	2.153	1.22495	1.21363	1.2057	1.38491	2.82696	1.8348	1.41586	0.603078	2.14621	2.65602	4.10273	1.62383	1.82023	2.02688	1.6044	0.822279	1.43106	1.07981	1.18778	1.81288	1.77667	1.57982	2.40385	2.25047	1.18551	1.26531	1.54146
Cell_0080	FOXO_TR	Glucose 17 mM + Glutamine 2.500000e-01 mM + Insulin 10000 ng/ml + EAA 1.000000e-01 X	2.87041	2.42936	1.3001	1.47019	2.3399	2.33135	2.42502	1.34584	1.85833	2.68871	2.77159	2.93053	1.74468	1.28331	1.74702	2.93969	2.27175	1.87866	2.6384	2.84551	2.80889	1.39759	2.25869	3.02354	3.01605	2.9188	1.24272	1.32641	3.04906	2.5247	3.22548	1.81788	2.3919	3.31648	3.01997	1.38126	2.54422	2.09258	3.28871	2.45916	1.11873	1.18365	2.93884	2.84597	2.89966	1.01121	2.35774
Cell_0080	AMPKARt2	Glucose 17 mM + Glutamine 2.500000e-01 mM + Insulin 10000 ng/ml + EAA 1.000000e-01 X	0.538167	0.537812	0.522869	0.51621	0.46832	0.582546	0.473553	0.551082	0.5412	0.495828	0.591436	0.624972	0.572399	0.634296	0.575176	0.656762	0.623508	0.547622	0.399527	0.537898	0.571925	0.600256	0.658854	0.668377	0.50886	0.597427	0.667213	0.703219	0.562556	0.487521	0.60419	0.572156	0.579113	0.625274	0.592684	0.668881	0.587703	0.66773	0.575448	0.529496	0.6689	0.549502	0.629649	0.651741	0.510139	0.462546	0.689268
Cell_0081	TFEB_TR	Glucose 17 mM + Glutamine 2.500000e-01 mM + Insulin 10000 ng/ml + EAA 1.000000e-01 X	1.3444	1.19476	1.67866	0.635329	2.99779	2.35878	1.87221	1.05497	1.32551	1.88657	1.88092	1.92609	1.88633	0.600354	3.3139	1.53087	0.845272	1.49733	1.85418	2.32143	1.52274	1.34256	1.30224	1.44583	2.56862	1.79114	1.52198	0.55207	2.0643	2.34896	3.76267	1.57149	0.728915	2.06693	1.692	0.901643	1.58369	1.0973	1.22461	1.82578	1.58478	1.68816	2.09607	2.13403	1.16847	1.37295	1.487
Cell_0081	FOXO_TR	Glucose 17 mM + Glutamine 2.500000e-01 mM + Insulin 10000 ng/ml + EAA 1.000000e-01 X	2.78584	2.38377	1.21277	1.38312	2.30765	2.19493	2.41554	1.29032	1.98218	2.68773	2.7418	2.94338	1.66848	1.34168	1.6804	2.96409	2.33242	1.82223	2.65164	2.69412	2.8296	1.37747	2.19648	3.09464	2.94408	3.01233	1.19078	1.36453	3.06867	2.46632	3.15827	1.76851	1.75503	3.26702	3.15034	1.73551	2.56405	2.07152	3.28821	2.428	1.11331	1.24264	2.86662	2.71322	2.78821	1.0279	2.25983
Cell_0081	AMPKARt2	Glucose 17 mM + Glutamine 2.500000e-01 mM + Insulin 10000 ng/ml + EAA 1.000000e-01 X	0.540313	0.544168	0.533625	0.508761	0.473025	0.595993	0.48109	0.557772	0.523812	0.496494	0.582631	0.623596	0.594957	0.642651	0.563729	0.672877	0.62961	0.553192	0.39668	0.539851	0.558639	0.606395	0.658063	0.653799	0.517864	0.60967	0.671923	0.673481	0.541577	0.497282	0.606655	0.565568	0.615205	0.620182	0.575706	0.679874	0.551934	0.670578	0.566768	0.51793	0.66878	0.559248	0.631073	0.652233	0.498869	0.476346	0.69991
Cell_0082	TFEB_TR	Glucose 17 mM + Glutamine 2.500000e-01 mM + Insulin 10000 ng/ml + EAA 1.000000e-01 X	1.40584	1.19722	1.84612	0.683371	2.91738	1.70146	1.90157	1.10292	1.53449	1.89263	1.85675	1.97442	1.85843	0.609525	2.07443	1.42405	1.02823	1.59861	1.73626	1.99816	1.36154	1.13176	1.17927	1.89124	2.04651	1.79941	1.63498	0.581947	1.87748	2.49974	4.2623	1.66376	0.774523	1.96362	1.5874	0.928955	1.80433	1.22033	1.26687	1.80526	1.41698	1.61601	2.24332	2.13442	1.32428	0.995601	1.55605
Cell_0082	FOXO_TR	Glucose 17 mM + Glutamine 2.500000e-01 mM + Insulin 10000 ng/ml + EAA 1.000000e-01 X	2.86935	2.4392	1.7041	1.34632	2.24844	2.16765	2.53132	1.28842	2.03327	2.67654	2.72813	2.92658	1.55947	1.42571	1.77013	2.81886	2.17761	1.79241	2.79717	2.82428	3.03512	1.26043	2.00792	3.10185	2.85536	3.14817	1.19188	1.36358	3.18765	2.44586	2.92688	1.70162	1.70956	3.26208	3.04806	1.83878	2.53703	1.9977	3.30152	2.37865	1.09494	1.28039	2.91484	2.62853	2.72889	1.02592	2.13521
Cell_0082	AMPKARt2	Glucose 17 mM + Glutamine 2.500000e-01 mM + Insulin 10000 ng/ml + EAA 1.000000e-01 X	0.541193	0.555784	0.550167	0.510394	0.463998	0.598314	0.475082	0.577734	0.544314	0.490053	0.576478	0.619617	0.608068	0.662753	0.567017	0.688964	0.613632	0.567139	0.412322	0.52482	0.569162	0.612249	0.667489	0.645581	0.512518	0.613762	0.665148	0.678836	0.536499	0.484804	0.603982	0.547755	0.61828	0.644866	0.576209	0.677433	0.538664	0.679765	0.547476	0.513798	0.668918	0.582187	0.642882	0.624203	0.496314	0.49956	0.694678
Cell_0083	TFEB_TR	Glucose 17 mM + Glutamine 2.500000e-01 mM + Insulin 10000 ng/ml + EAA 1.000000e-01 X	1.40006	1.23883	1.95221	0.773498	2.84073	1.85547	1.97384	1.07343	1.54879	1.8874	1.74563	2.063	1.73558	0.675999	0.750167	1.41723	1.11631	1.49481	1.34328	1.71935	1.12106	1.03316	1.14297	1.87961	1.90182	1.88313	1.59282	0.665255	1.96154	2.49335	4.14705	1.81413	0.734523	1.97249	1.55893	0.927084	1.88985	1.24043	1.30503	1.81845	1.60696	1.53826	2.26887	2.23822	1.31677	1.13241	1.64804
Cell_0083	FOXO_TR	Glucose 17 mM + Glutamine 2.500000e-01 mM + Insulin 10000 ng/ml + EAA 1.000000e-01 X	2.96777	2.46019	2.57066	1.3297	2.25667	2.32796	2.56472	1.40876	2.03841	2.68605	2.75673	2.87518	1.5001	1.47132	1.90221	2.71276	2.03873	1.69857	2.83496	2.95031	3.21382	1.30989	1.8152	3.1851	2.78534	3.18895	1.21422	1.37025	3.23193	2.33388	2.9837	1.70358	1.77317	3.35763	2.98923	1.92713	2.37019	1.89477	3.33602	2.35359	1.13518	1.28115	3.00731	2.60039	2.7393	1.07086	2.11348
Cell_0083	AMPKARt2	Glucose 17 mM + Glutamine 2.500000e-01 mM + Insulin 10000 ng/ml + EAA 1.000000e-01 X	0.539757	0.540156	0.513515	0.497567	0.457525	0.599089	0.469546	0.5957	0.559571	0.481959	0.574106	0.614683	0.599865	0.677202	0.572325	0.687474	0.595155	0.571809	0.411175	0.518473	0.586082	0.631285	0.664657	0.651961	0.494617	0.599453	0.671856	0.710184	0.553618	0.477862	0.60082	0.538396	0.625284	0.65252	0.604607	0.667255	0.541811	0.678837	0.553716	0.509438	0.667625	0.550938	0.661942	0.603457	0.49364	0.519844	0.679772
Cell_0084	TFEB_TR	Glucose 17 mM + Glutamine 2.500000e-01 mM + Insulin 10000 ng/ml + EAA 1.000000e-01 X	1.34993	1.23944	1.98608	0.846985	2.90135	2.14729	2.19994	1.17826	1.65716	1.89447	1.86986	2.10382	1.6005	0.704018	1.10759	1.88103	1.04353	1.50157	1.87864	2.27579	1.29975	1.21242	1.23048	1.37118	1.98348	1.77424	1.44455	0.718977	2.06519	1.95298	3.96612	1.60164	0.788622	2.08225	1.76796	0.915935	1.84815	1.15915	1.32061	1.86216	1.83767	1.60851	2.09513	2.27268	1.15873	1.57166	1.55224
Cell_0084	FOXO_TR	Glucose 17 mM + Glutamine 2.500000e-01 mM + Insulin 10000 ng/ml + EAA 1.000000e-01 X	2.82705	2.43714	2.97404	1.24054	2.35193	2.50102	2.49191	1.52235	2.1075	2.75172	2.73528	2.83489	1.4513	1.45531	1.91973	2.82547	2.01998	1.63548	2.75467	2.72804	3.23854	1.92933	1.74418	3.27213	2.72038	3.03922	1.18576	1.38881	3.12557	2.22584	3.16013	1.63467	1.82658	3.31561	2.97535	2.07408	2.19206	1.92013	3.33759	2.36565	1.12111	1.25783	2.95878	2.6492	2.69745	1.15596	2.11953
Cell_0084	AMPKARt2	Glucose 17 mM + Glutamine 2.500000e-01 mM + Insulin 10000 ng/ml + EAA 1.000000e-01 X	0.538523	0.533062	0.482444	0.499073	0.463905	0.606429	0.477105	0.600085	0.54522	0.484086	0.580075	0.618576	0.608246	0.668142	0.566627	0.680994	0.598568	0.566764	0.40379	0.515627	0.585786	0.655968	0.628858	0.658595	0.498977	0.576394	0.676777	0.708031	0.548767	0.496484	0.605165	0.549075	0.634733	0.638527	0.623868	0.65505	0.545102	0.67617	0.595553	0.506805	0.669481	0.501657	0.665661	0.622333	0.472065	0.529907	0.683262
Cell_0085	TFEB_TR	Glucose 17 mM + Glutamine 2.500000e-01 mM + Insulin 10000 ng/ml + EAA 1.000000e-01 X	1.34954	1.47937	2.00997	0.916745	2.84472	2.13592	2.17287	1.334	1.65609	1.88157	2.03003	1.80711	1.62092	0.769704	1.18047	2.2139	1.05196	1.56703	1.09622	2.94481	1.44924	1.40154	1.19384	1.63129	1.97068	1.64717	1.49197	0.759601	2.01785	1.83662	4.87721	1.40016	0.902009	2.18771	1.97257	0.940278	1.76387	1.10128	1.30692	1.89759	1.75931	1.70909	2.10627	2.30561	1.171	1.31347	1.45564
Cell_0085	FOXO_TR	Glucose 17 mM + Glutamine 2.500000e-01 mM + Insulin 10000 ng/ml + EAA 1.000000e-01 X	2.66656	2.39039	2.98423	1.15197	2.41339	2.57536	2.48337	1.5261	2.21978	2.7967	2.67751	2.81573	1.37259	1.39373	1.82978	2.9459	2.03848	1.60127	1.5026	2.56656	3.17384	2.78418	1.74594	3.24136	2.64992	2.96716	1.14958	1.37005	3.08685	2.24159	3.02405	1.4917	1.77484	3.24117	2.88569	2.10109	2.21483	2.06038	3.2886	2.41873	1.10766	1.22099	2.93659	2.69667	2.65527	1.18996	2.1332
Cell_0085	AMPKARt2	Glucose 17 mM + Glutamine 2.500000e-01 mM + Insulin 10000 ng/ml + EAA 1.000000e-01 X	0.53754	0.546057	0.515842	0.51056	0.4632	0.613656	0.473963	0.593206	0.509037	0.488796	0.562999	0.625231	0.623362	0.654223	0.569298	0.681827	0.61024	0.572097	0.674661	0.518642	0.58129	0.620983	0.58823	0.652948	0.513488	0.560229	0.664354	0.69454	0.528611	0.503528	0.611701	0.564361	0.636734	0.639507	0.625294	0.647843	0.559368	0.669748	0.595704	0.513268	0.692283	0.475869	0.649499	0.655557	0.456915	0.548977	0.693847
Cell_0086	TFEB_TR	Glucose 17 mM + Glutamine 2.500000e-01 mM + Insulin 10000 ng/ml + EAA 1.000000e-01 X	1.4277	1.53993	2.01943	1.02606	2.63299	2.20324	1.9526	1.18156	1.34535	1.8504	1.83468	1.61503	1.76409	0.70992	0.765499	1.9797	1.04699	1.5173	1.16403	2.39983	1.26025	1.56728	1.08815	2.26723	2.00179	1.74639	1.68152	0.758213	2.11654	2.15951	4.81304	1.53407	0.83758	2.0735	2.03434	1.02931	1.59372	1.15655	1.30216	1.96128	1.71945	1.7473	2.23073	2.29069	1.27346	0.984254	1.49493
Cell_0086	FOXO_TR	Glucose 17 mM + Glutamine 2.500000e-01 mM + Insulin 10000 ng/ml + EAA 1.000000e-01 X	2.66336	2.26738	3.09111	1.16267	2.35627	2.61319	2.53803	1.42996	2.18489	2.82144	2.68472	2.80062	1.28837	1.29256	1.75869	2.84788	1.95709	1.54193	1.53019	2.77256	3.10085	3.16232	1.71301	3.21305	2.63143	3.16368	1.16307	1.31654	3.19477	2.21825	2.77874	1.4106	1.72179	3.32386	2.90859	2.084	2.3439	2.09183	3.26491	2.4753	1.4802	1.18974	3.02677	2.6878	2.69987	1.19225	2.13835
Cell_0086	AMPKARt2	Glucose 17 mM + Glutamine 2.500000e-01 mM + Insulin 10000 ng/ml + EAA 1.000000e-01 X	0.541205	0.536361	0.544307	0.507387	0.46148	0.626922	0.460879	0.591425	0.45289	0.491625	0.520731	0.627775	0.606467	0.660755	0.590188	0.676094	0.608365	0.58788	0.658211	0.536294	0.581348	0.538467	0.585227	0.640898	0.51059	0.562538	0.670328	0.702306	0.535595	0.486185	0.611991	0.563453	0.631083	0.640623	0.632766	0.648331	0.586058	0.661023	0.568504	0.515254	0.690694	0.43813	0.635908	0.66069	0.475815	0.567889	0.695511
Cell_0087	TFEB_TR	Glucose 17 mM + Glutamine 2.500000e-01 mM + Insulin 10000 ng/ml + EAA 1.000000e-01 X	1.4795	1.13358	2.09743	1.12625	2.57148	2.20817	1.91828	1.12574	1.28547	1.85535	1.77702	1.68333	1.78138	0.588074	0.930342	1.62253	1.02197	1.5444	1.30769	1.42976	1.27039	1.67897	1.01906	2.02441	2.05163	1.82661	1.62468	0.734584	2.46566	2.33704	3.33958	1.61555	0.705003	1.86924	2.15871	1.07009	1.54739	1.5268	1.31575	2.00879	2.01774	1.88157	2.23861	2.27627	1.27975	1.27167	1.53756
Cell_0087	FOXO_TR	Glucose 17 mM + Glutamine 2.500000e-01 mM + Insulin 10000 ng/ml + EAA 1.000000e-01 X	2.62951	2.15472	3.21769	1.19397	2.26404	2.61554	2.54264	1.48324	2.01444	2.90354	2.7746	2.80714	1.22107	1.24713	1.81654	2.6842	1.86289	1.49132	1.50529	2.8725	3.00175	3.12333	1.64223	3.27239	2.69592	3.34018	1.19939	1.28235	3.26195	2.17523	2.74912	1.38787	1.74917	3.41593	3.02023	2.07124	2.38608	1.77914	3.24277	2.43706	2.17253	1.15766	3.01587	2.66257	2.75225	1.18982	2.10848
Cell_0087	AMPKARt2	Glucose 17 mM + Glutamine 2.500000e-01 mM + Insulin 10000 ng/ml + EAA 1.000000e-01 X	0.549689	0.528194	0.541757	0.499056	0.472226	0.638648	0.467438	0.606528	0.400853	0.498117	0.505235	0.63339	0.585163	0.6753	0.605774	0.664636	0.594804	0.595207	0.668409	0.550492	0.581272	0.526698	0.616272	0.634454	0.504047	0.577505	0.699507	0.698381	0.553986	0.474603	0.606035	0.558044	0.630937	0.63358	0.637785	0.6469	0.574505	0.461893	0.598589	0.509982	0.612112	0.398065	0.644998	0.648013	0.491337	0.565817	0.702857
Cell_0088	TFEB_TR	Glucose 17 mM + Glutamine 2.500000e-01 mM + Insulin 10000 ng/ml + EAA 1.000000e-01 X	1.41276	1.37107	2.13151	1.16782	2.63159	2.16679	1.78335	1.49363	1.5383	1.85932	2.08664	1.65103	1.70972	0.690629	1.13354	1.58406	1.11415	1.56551	1.27703	1.44288	1.46368	1.57007	1.02223	1.49297	2.00703	1.7329	1.43782	0.792615	2.48513	2.56163	3.10231	1.50448	0.71577	2.06302	2.31599	1.039	1.69268	1.45069	1.3146	1.99721	2.1714	2.16279	2.17258	2.37482	1.22516	1.38318	1.63382
Cell_0088	FOXO_TR	Glucose 17 mM + Glutamine 2.500000e-01 mM + Insulin 10000 ng/ml + EAA 1.000000e-01 X	2.55203	2.13836	3.27101	1.16458	2.24956	2.58501	2.47357	1.97683	1.95784	2.95686	2.8489	2.83096	1.1942	1.31917	1.88266	2.71935	1.8706	1.45437	1.46255	2.65382	2.8213	3.08192	1.58592	3.2297	2.68642	3.21951	1.18277	1.26855	3.24848	2.25563	2.66086	1.35642	1.76745	3.35765	3.05271	2.01993	2.31248	1.70171	3.19119	2.37227	2.57222	1.10451	2.95488	2.68712	2.73472	1.18441	2.10227
Cell_0088	AMPKARt2	Glucose 17 mM + Glutamine 2.500000e-01 mM + Insulin 10000 ng/ml + EAA 1.000000e-01 X	0.552742	0.54548	0.541046	0.498235	0.473	0.635612	0.485451	0.588566	0.366916	0.498764	0.522881	0.644259	0.593589	0.673045	0.59929	0.666056	0.58342	0.591582	0.668349	0.556459	0.587732	0.576188	0.643465	0.635216	0.506885	0.593069	0.705196	0.671746	0.551186	0.471142	0.594606	0.563318	0.639177	0.643595	0.633112	0.643461	0.539571	0.468409	0.627484	0.516193	0.513956	0.396658	0.667349	0.648192	0.479295	0.555341	0.703382
Cell_0089	TFEB_TR	Glucose 17 mM + Glutamine 2.500000e-01 mM + Insulin 10000 ng/ml + EAA 1.000000e-01 X	1.41099	2.3199	1.96257	1.19741	0.859718	2.32229	1.55877	1.61143	1.53578	1.86927	2.15612	1.73955	1.70375	0.75263	1.08617	1.91173	1.24456	1.47391	1.13503	1.92829	1.47786	1.37093	1.13245	1.49615	1.97689	1.69875	1.43161	0.829344	2.06521	2.63173	3.75944	1.44023	0.765432	2.4065	2.11795	1.07948	1.70067	1.46829	1.30432	2.05021	1.95315	2.22164	2.0982	2.30281	1.14652	1.11204	1.83204
Cell_0089	FOXO_TR	Glucose 17 mM + Glutamine 2.500000e-01 mM + Insulin 10000 ng/ml + EAA 1.000000e-01 X	2.53346	2.17632	3.32307	1.13522	1.81469	2.62935	2.41857	2.58007	1.97638	2.94172	2.76872	2.88938	1.18556	1.37	1.81851	2.84877	1.89231	1.39993	1.47232	2.52934	2.6011	3.10385	1.56305	3.09352	2.568	3.06696	1.1365	1.22787	3.25483	2.29783	2.30141	1.33225	1.73375	3.25271	3.01818	1.99523	2.21485	1.656	3.22115	2.43187	2.55149	1.05091	2.99349	2.79203	2.63276	1.24292	2.09206
Cell_0089	AMPKARt2	Glucose 17 mM + Glutamine 2.500000e-01 mM + Insulin 10000 ng/ml + EAA 1.000000e-01 X	0.548442	0.547391	0.532656	0.496285	0.752075	0.629568	0.484477	0.506699	0.340276	0.488471	0.529655	0.65236	0.603594	0.6598	0.581222	0.66757	0.57184	0.595123	0.66282	0.56731	0.59186	0.57992	0.651734	0.636913	0.508669	0.602775	0.695537	0.639961	0.543458	0.468155	0.584783	0.573684	0.652652	0.651109	0.636349	0.647971	0.568274	0.48548	0.598254	0.530867	0.473847	0.415818	0.67413	0.653497	0.47262	0.543276	0.679217
Cell_0090	TFEB_TR	Glucose 17 mM + Glutamine 2.500000e-01 mM + Insulin 10000 ng/ml + EAA 1.000000e-01 X	1.5695	2.33418	1.89902	1.24108	0.866954	2.2532	1.794	1.48293	1.36357	1.95204	2.00907	2.01389	1.69893	0.614068	1.27096	2.18794	1.26762	1.54468	1.17151	2.20664	1.51944	1.59132	1.08567	1.57227	1.9794	1.72502	1.54775	0.760621	1.96793	2.2159	3.18106	1.44667	0.781431	2.39778	1.87098	1.12508	1.59515	1.41743	1.30421	2.18997	1.9552	1.95247	2.14349	2.07173	1.16629	1.20087	1.91019
Cell_0090	FOXO_TR	Glucose 17 mM + Glutamine 2.500000e-01 mM + Insulin 10000 ng/ml + EAA 1.000000e-01 X	2.4724	2.20879	3.30489	1.14871	1.8711	2.69572	2.46477	2.71439	1.8415	3.00704	2.57938	2.96066	1.18868	1.31125	1.80922	2.81705	1.85101	1.32737	1.50064	2.58302	2.43923	3.18148	1.55707	3.14136	2.54952	3.17083	1.36866	1.1982	3.21785	2.25742	1.96741	1.35556	1.77338	3.25557	2.9406	1.93887	2.17707	1.61837	3.31137	2.52469	2.53199	1.00762	2.97822	2.88482	2.53894	1.28785	1.9903
Cell_0090	AMPKARt2	Glucose 17 mM + Glutamine 2.500000e-01 mM + Insulin 10000 ng/ml + EAA 1.000000e-01 X	0.550465	0.539497	0.522513	0.491548	0.760931	0.622349	0.477812	0.452065	0.331566	0.483697	0.520193	0.6548	0.603866	0.651901	0.572098	0.655514	0.55887	0.61496	0.680533	0.574413	0.582381	0.560755	0.663384	0.638867	0.506986	0.600774	0.707472	0.600204	0.54871	0.476021	0.593069	0.582489	0.667517	0.637358	0.639398	0.653018	0.628388	0.487419	0.583583	0.53376	0.473174	0.42972	0.656031	0.655632	0.481402	0.540052	0.656059
Cell_0091	TFEB_TR	Glucose 17 mM + Glutamine 2.500000e-01 mM + Insulin 10000 ng/ml + EAA 1.000000e-01 X	1.53463	1.54781	2.06283	1.28785	0.886954	1.85969	2.145	1.61903	1.30608	2.0047	2.03033	1.95031	1.64916	0.616849	1.56511	2.1455	1.1543	1.58381	1.33603	2.57879	1.3804	2.27229	0.912703	1.1559	1.92049	1.60426	1.82825	0.827032	2.07819	1.96792	2.32816	1.41573	0.840452	2.18689	2.16145	1.04548	1.58998	1.38625	1.29353	2.26445	2.22561	1.8674	2.30295	2.13575	1.31288	1.59316	1.84982
Cell_0091	FOXO_TR	Glucose 17 mM + Glutamine 2.500000e-01 mM + Insulin 10000 ng/ml + EAA 1.000000e-01 X	2.37004	2.17585	3.25875	1.17303	1.80663	2.60257	2.52913	2.54042	1.66471	3.10834	2.52825	2.94547	1.22322	1.23898	1.91598	2.75109	1.79366	1.26051	1.51994	2.57547	2.36515	3.25716	1.54362	1.85118	2.60624	3.30369	2.06294	1.23516	3.10806	2.31012	1.83528	1.36365	1.84826	3.32159	2.93815	1.83858	2.14285	1.63535	3.30418	2.4813	2.62567	0.959118	2.90408	2.86257	2.60618	1.32669	1.8684
Cell_0091	AMPKARt2	Glucose 17 mM + Glutamine 2.500000e-01 mM + Insulin 10000 ng/ml + EAA 1.000000e-01 X	0.560755	0.543885	0.518279	0.488029	0.76523	0.618564	0.484453	0.477667	0.341517	0.490682	0.514079	0.655251	0.612445	0.639364	0.578799	0.649397	0.563623	0.636615	0.687892	0.570312	0.57873	0.566734	0.682321	0.507519	0.511348	0.597787	0.701841	0.570771	0.554406	0.486211	0.612932	0.580426	0.665434	0.637181	0.628398	0.645944	0.632178	0.488208	0.590296	0.525574	0.460899	0.443693	0.641665	0.659445	0.492567	0.566307	0.642639
Cell_0092	TFEB_TR	Glucose 17 mM + Glutamine 2.500000e-01 mM + Insulin 10000 ng/ml + EAA 1.000000e-01 X	1.24847	1.40275	2.10508	1.36303	0.898574	1.8122	2.07969	1.51074	1.20063	1.96924	2.04292	1.70215	1.60205	0.685405	1.52143	2.15953	1.04338	1.34686	1.37335	2.6843	1.11027	2.44835	1.10885	1.1546	1.71434	1.51705	2.17581	1.08238	1.85603	1.97267	2.5381	1.41375	0.86141	1.94817	2.49096	1.02946	1.5559	1.52156	1.26384	2.25231	2.11373	2.05652	2.25029	2.32801	1.28284	1.87072	1.97781
Cell_0092	FOXO_TR	Glucose 17 mM + Glutamine 2.500000e-01 mM + Insulin 10000 ng/ml + EAA 1.000000e-01 X	2.35079	2.14673	3.28477	1.21082	1.79578	2.44785	2.48873	2.52128	1.60562	3.04947	2.65715	2.92901	1.17961	1.1948	1.87676	2.82737	1.79109	1.24695	1.51992	2.53533	2.34473	3.26444	1.52639	1.88559	2.57008	3.27509	2.7443	1.26227	3.06059	2.34857	1.79142	1.30541	1.76738	3.34228	3.07747	1.84247	2.1082	1.67223	3.17788	2.33352	2.63777	0.931518	2.9571	2.78319	2.67661	1.7261	1.81637
Cell_0092	AMPKARt2	Glucose 17 mM + Glutamine 2.500000e-01 mM + Insulin 10000 ng/ml + EAA 1.000000e-01 X	0.563679	0.539721	0.499595	0.476723	0.761338	0.634178	0.483266	0.503747	0.350468	0.498925	0.51349	0.656196	0.619695	0.614854	0.587213	0.654782	0.575955	0.648776	0.673277	0.569858	0.580755	0.565343	0.671122	0.514493	0.527354	0.607834	0.651551	0.572901	0.561018	0.483806	0.622387	0.569234	0.648551	0.652709	0.616003	0.632703	0.61696	0.496043	0.595284	0.518796	0.459444	0.465665	0.648175	0.649028	0.506323	0.585594	0.623794
Cell_0093	TFEB_TR	Glucose 17 mM + Glutamine 2.500000e-01 mM + Insulin 10000 ng/ml + EAA 1.000000e-01 X	1.25066	1.70392	2.14511	1.42091	0.883081	2.11966	2.1127	1.1516	1.13136	1.99984	1.97014	1.76331	1.63461	0.604787	1.15853	2.10154	1.10336	1.35121	1.24832	2.06637	1.6207	1.92367	1.37226	1.15311	1.40899	1.65842	2.16759	1.21622	1.82538	1.76574	2.74606	1.51001	0.81647	1.96267	2.37582	1.13064	1.58803	1.65115	1.22631	2.21657	1.71557	2.05321	0.742672	2.20311	1.0712	2.10873	2.4195
Cell_0093	FOXO_TR	Glucose 17 mM + Glutamine 2.500000e-01 mM + Insulin 10000 ng/ml + EAA 1.000000e-01 X	2.37998	2.21715	3.35395	1.25236	1.87271	2.42753	2.40909	2.59205	1.5454	2.92953	2.74283	3.05841	1.17354	1.13415	1.73418	2.82818	1.86367	1.2781	1.44593	2.56663	2.28133	3.31037	1.52696	1.91871	2.53559	3.21567	2.9267	1.22847	3.07935	2.26262	1.76869	1.27885	1.68308	3.37414	3.14338	1.86733	2.19203	1.65894	2.99204	2.19428	2.57198	0.937556	1.73565	2.74173	2.54635	2.43281	1.78962
Cell_0093	AMPKARt2	Glucose 17 mM + Glutamine 2.500000e-01 mM + Insulin 10000 ng/ml + EAA 1.000000e-01 X	0.561869	0.534629	0.486156	0.46815	0.754226	0.643465	0.481997	0.503548	0.36165	0.50419	0.521833	0.654581	0.629306	0.599001	0.586281	0.65559	0.562075	0.661647	0.67624	0.574416	0.573906	0.566716	0.634109	0.499401	0.543874	0.617385	0.623288	0.57298	0.574026	0.478124	0.626901	0.563301	0.649034	0.648666	0.607706	0.62212	0.622964	0.481523	0.648334	0.520934	0.514497	0.491998	0.540856	0.62873	0.514397	0.563977	0.60966
Cell_0094	TFEB_TR	Glucose 17 mM + Glutamine 2.500000e-01 mM + Insulin 10000 ng/ml + EAA 1.000000e-01 X	1.57641	1.76965	2.39683	1.36728	0.857127	2.12097	2.34325	1.22294	1.29569	2.07444	1.89558	1.90234	1.80649	0.592292	0.948173	1.64199	1.18635	1.65901	1.30659	1.56872	2.29731	1.98018	1.18411	1.15789	1.24352	1.78581	2.01066	1.16973	2.06173	1.99958	2.39024	1.55089	0.856628	2.31485	2.30019	1.09621	1.831	1.6743	1.17572	2.1553	1.54194	1.87345	0.869437	2.07313	1.05358	2.1511	2.84661
Cell_0094	FOXO_TR	Glucose 17 mM + Glutamine 2.500000e-01 mM + Insulin 10000 ng/ml + EAA 1.000000e-01 X	2.40598	2.23453	3.50443	1.24156	1.87257	2.459	2.38899	2.53775	1.46962	2.93249	2.71001	3.17989	1.6332	1.06843	1.74387	2.69033	1.9106	1.26898	1.45061	2.63177	2.09489	3.35317	1.49227	1.96234	2.56532	3.17128	2.84598	1.2145	3.10025	2.23292	1.73098	1.27119	1.80078	3.47134	3.08957	1.88287	2.28312	1.78177	2.85005	2.11771	2.54154	0.933487	1.81556	2.71542	2.45364	2.80974	1.76002
Cell_0094	AMPKARt2	Glucose 17 mM + Glutamine 2.500000e-01 mM + Insulin 10000 ng/ml + EAA 1.000000e-01 X	0.567065	0.535128	0.487956	0.493172	0.752718	0.634551	0.516155	0.523384	0.378841	0.506134	0.531597	0.651304	0.635621	0.595991	0.578517	0.649808	0.538949	0.671558	0.692142	0.569103	0.581756	0.58553	0.626732	0.509448	0.539818	0.628432	0.640744	0.553185	0.570959	0.477833	0.633626	0.564611	0.66188	0.635927	0.59986	0.61734	0.615869	0.483139	0.697914	0.534137	0.561545	0.505616	0.550448	0.627429	0.523517	0.548001	0.600117
Cell_0095	TFEB_TR	Glucose 17 mM + Glutamine 2.500000e-01 mM + Insulin 10000 ng/ml + EAA 1.000000e-01 X	1.64593	1.61309	2.45386	1.26393	0.86393	1.9817	2.07447	1.27142	1.44125	1.18519	1.7791	1.93642	1.98048	0.675769	1.05072	1.50466	1.12274	1.6018	1.63892	1.82608	1.86548	2.59979	1.13744	1.17185	1.29561	1.81552	2.03641	1.17986	1.96636	2.60488	2.32556	1.5285	0.907114	2.15919	2.44211	1.0034	1.85992	1.64878	1.12524	2.10878	1.56307	1.81227	0.905607	2.32791	1.17299	1.72415	2.90179
Cell_0095	FOXO_TR	Glucose 17 mM + Glutamine 2.500000e-01 mM + Insulin 10000 ng/ml + EAA 1.000000e-01 X	2.44293	2.1267	3.65076	1.20004	1.81692	2.47793	2.40824	2.43531	1.48625	1.21679	2.6943	3.15686	2.38171	1.02181	1.82428	2.71368	1.83585	1.22338	1.64201	2.66471	1.92953	3.2951	1.37255	2.03884	2.55513	3.16551	2.84383	1.2482	3.14333	2.27646	1.69751	1.26036	1.83137	3.50919	3.08431	2.03485	2.22888	2.10672	2.84786	2.10666	2.50303	0.913348	1.84613	2.66639	2.48221	2.74062	1.76518
Cell_0095	AMPKARt2	Glucose 17 mM + Glutamine 2.500000e-01 mM + Insulin 10000 ng/ml + EAA 1.000000e-01 X	0.56641	0.521003	0.479043	0.534723	0.754818	0.641007	0.553122	0.548143	0.400746	0.437654	0.52561	0.657808	0.587845	0.587813	0.573009	0.644924	0.535037	0.664224	0.694651	0.557797	0.605703	0.580744	0.642491	0.528759	0.520627	0.654955	0.646394	0.551336	0.553037	0.480758	0.629718	0.582535	0.658253	0.638984	0.601144	0.616771	0.616102	0.526009	0.655605	0.546331	0.531931	0.493944	0.568174	0.629892	0.548782	0.55617	0.577864
Cell_0096	TFEB_TR	Glucose 17 mM + Glutamine 2.500000e-01 mM + Insulin 10000 ng/ml + EAA 1.000000e-01 X	1.47102	1.39497	2.32038	1.22357	0.88858	2.20259	1.71013	1.04576	1.3814	1.19782	1.82945	2.09071	1.99788	0.658228	1.06064	1.97067	1.10485	1.23855	1.71876	2.28967	1.19686	2.43598	1.4985	1.1913	1.49761	1.90717	1.88982	1.31752	1.80484	2.35808	2.54432	1.64464	0.82132	1.57871	2.51422	1.08991	1.66258	1.70517	1.09559	2.09302	1.6709	1.8431	0.868371	2.53765	1.18135	1.32078	2.69102
Cell_0096	FOXO_TR	Glucose 17 mM + Glutamine 2.500000e-01 mM + Insulin 10000 ng/ml + EAA 1.000000e-01 X	2.46109	2.08238	3.56059	1.19147	1.79278	2.51741	2.43897	2.40819	1.52017	1.21478	2.779	3.13387	2.72328	0.983382	1.82698	2.88813	1.74118	1.23711	1.72065	2.61739	1.96687	3.27546	1.30242	2.1022	2.54398	3.22038	2.82912	1.28033	3.13176	2.26745	1.76129	1.58702	1.58268	3.43452	3.1013	2.06384	2.16255	2.35713	2.88102	2.11463	2.39754	0.904274	1.86261	2.69203	2.39496	2.66699	1.77275
Cell_0096	AMPKARt2	Glucose 17 mM + Glutamine 2.500000e-01 mM + Insulin 10000 ng/ml + EAA 1.000000e-01 X	0.556142	0.514174	0.482642	0.552598	0.753461	0.650724	0.541536	0.554879	0.432063	0.416286	0.520095	0.670957	0.523908	0.580801	0.585909	0.643237	0.531133	0.661295	0.692333	0.549752	0.609286	0.563746	0.635123	0.514513	0.514486	0.659436	0.63645	0.571038	0.555473	0.485864	0.622118	0.610516	0.648381	0.644964	0.617863	0.606452	0.643106	0.522594	0.601599	0.54824	0.512955	0.468805	0.58826	0.617721	0.558908	0.549328	0.557959
Cell_0097	TFEB_TR	Glucose 17 mM + Glutamine 2.500000e-01 mM + Insulin 10000 ng/ml + EAA 1.000000e-01 X	1.48575	1.48381	2.46345	1.21222	0.87233	2.28936	1.99097	1.1764	1.26549	1.21707	2.04378	2.16616	1.95267	0.579344	0.942255	2.1577	1.20104	1.10699	1.42481	2.43599	1.27877	1.79528	1.52844	1.20312	1.77163	1.91902	1.82584	1.43355	1.06972	1.90599	2.49998	1.78029	0.748344	1.71986	2.451	1.2031	1.7691	2.00144	1.08687	2.04777	1.7123	1.87044	0.836283	2.38913	1.25477	1.56056	2.55638
Cell_0097	FOXO_TR	Glucose 17 mM + Glutamine 2.500000e-01 mM + Insulin 10000 ng/ml + EAA 1.000000e-01 X	2.45316	2.09568	3.43676	1.20896	1.76426	2.4239	2.47132	2.43256	1.50584	1.2275	2.89655	3.13791	2.65129	0.955759	1.81339	2.92879	1.73747	1.25968	1.59457	2.53632	2.06854	3.31379	1.36331	2.09198	2.58828	3.16776	2.72932	1.29331	1.56491	2.28779	1.86389	2.30303	1.36983	3.41	3.11063	1.84215	2.16868	2.4578	2.8827	2.11142	2.34328	0.902332	1.81453	2.85896	2.33408	2.68986	1.71586
Cell_0097	AMPKARt2	Glucose 17 mM + Glutamine 2.500000e-01 mM + Insulin 10000 ng/ml + EAA 1.000000e-01 X	0.554685	0.524758	0.50581	0.557489	0.751781	0.639498	0.512668	0.55563	0.451025	0.392237	0.527744	0.673672	0.536946	0.588622	0.608087	0.640211	0.522964	0.67629	0.687098	0.539635	0.603259	0.568464	0.623944	0.511984	0.522022	0.634259	0.639508	0.582922	0.651269	0.48641	0.626379	0.605086	0.643549	0.644223	0.633995	0.589949	0.642113	0.467874	0.610708	0.550233	0.557849	0.461434	0.591022	0.617213	0.538502	0.537978	0.560314
Cell_0098	TFEB_TR	Glucose 17 mM + Glutamine 2.500000e-01 mM + Insulin 10000 ng/ml + EAA 1.000000e-01 X	1.5924	1.67159	2.67512	1.1762	0.868907	2.01465	2.23373	1.26909	1.20099	1.23576	2.014	2.11306	1.95284	0.587573	1.08426	1.86799	1.18	1.16599	1.24331	2.13032	1.46598	1.76951	1.20268	1.21251	1.78437	1.78917	2.24489	1.36753	1.13534	2.28787	2.38836	1.77003	0.786189	2.13275	2.26417	1.16667	1.91127	2.26871	1.11061	2.00823	1.55994	1.81637	0.830039	2.33227	1.42455	2.17672	2.52269
Cell_0098	FOXO_TR	Glucose 17 mM + Glutamine 2.500000e-01 mM + Insulin 10000 ng/ml + EAA 1.000000e-01 X	2.41376	2.02727	3.59757	1.22738	1.746	2.22327	2.4759	2.43177	1.4961	1.26136	2.95946	3.04752	2.63444	0.953983	1.82569	2.85275	1.75357	1.16809	1.53323	2.52246	2.04385	3.28316	1.36894	2.06254	2.59171	2.99827	2.72643	1.28059	1.52905	2.3769	1.88623	2.79045	1.3344	3.48393	3.15571	1.77466	2.23042	2.47735	2.95847	2.13119	2.43728	0.904457	1.68655	2.9813	2.41845	2.67923	1.64712
Cell_0098	AMPKARt2	Glucose 17 mM + Glutamine 2.500000e-01 mM + Insulin 10000 ng/ml + EAA 1.000000e-01 X	0.561563	0.522076	0.502241	0.564643	0.7573	0.632278	0.511033	0.544766	0.441404	0.40327	0.525013	0.67201	0.584	0.596438	0.605509	0.632563	0.533608	0.684254	0.669432	0.531701	0.610054	0.56733	0.638038	0.540787	0.527516	0.642997	0.631887	0.597735	0.644663	0.480681	0.63319	0.582715	0.630551	0.646417	0.629733	0.590838	0.623169	0.465833	0.612353	0.551086	0.57657	0.486765	0.579676	0.624828	0.529853	0.544408	0.574073
Cell_0099	TFEB_TR	Glucose 17 mM + Glutamine 2.500000e-01 mM + Insulin 10000 ng/ml + EAA 1.000000e-01 X	1.51153	1.45969	2.6568	1.14246	0.918305	2.06293	1.97388	0.964722	1.15843	1.23792	1.86101	2.44282	1.92813	0.705943	1.26921	1.75805	1.01514	1.22949	1.23513	1.57262	1.29789	2.15748	1.08956	1.24278	1.41705	1.77176	2.20515	1.18646	1.11083	2.48933	2.37808	1.79169	0.863068	1.95588	2.15745	1.08644	1.78242	2.20377	1.14581	2.01613	1.59773	1.70311	0.845008	2.37983	1.38696	2.53741	2.46243
Cell_0099	FOXO_TR	Glucose 17 mM + Glutamine 2.500000e-01 mM + Insulin 10000 ng/ml + EAA 1.000000e-01 X	2.32184	2.00774	3.7692	1.22967	1.75204	2.24971	2.46241	2.4113	1.45456	1.31721	2.98675	2.91547	2.65973	0.965612	1.83762	2.84284	1.74458	1.18367	1.5047	2.54713	2.0038	3.22	1.27305	2.07035	2.55674	2.93126	2.91536	1.26255	1.53833	2.40205	1.86903	2.82676	1.29825	3.49652	3.12886	1.7843	2.31093	2.31041	2.98726	2.17161	2.54	0.903457	1.67463	2.91106	2.37796	2.72277	1.64956
Cell_0099	AMPKARt2	Glucose 17 mM + Glutamine 2.500000e-01 mM + Insulin 10000 ng/ml + EAA 1.000000e-01 X	0.568513	0.523821	0.490973	0.56238	0.764972	0.635058	0.516245	0.531023	0.430135	0.438499	0.510866	0.677624	0.58955	0.593798	0.590411	0.629378	0.553089	0.683788	0.655995	0.530499	0.603455	0.552528	0.651333	0.547746	0.538232	0.67333	0.606078	0.621753	0.650828	0.482032	0.638819	0.604379	0.619102	0.651574	0.617929	0.600649	0.638918	0.492185	0.577115	0.539025	0.553763	0.504265	0.576865	0.61112	0.541784	0.542362	0.591074
Cell_0100	TFEB_TR	Glucose 17 mM + Glutamine 2.500000e-01 mM + Insulin 10000 ng/ml + EAA 1.000000e-01 X	1.32388	1.37915	2.6035	1.11567	0.901581	2.21923	1.87952	1.15987	1.10543	1.22081	1.9145	2.74113	1.84876	0.743625	1.05803	1.95285	0.902595	1.30994	1.15347	1.41964	1.10338	2.44022	1.14219	1.27039	1.25125	1.84579	1.74374	1.13588	1.11311	2.28266	2.39812	1.89287	0.991872	1.82742	2.25029	1.09157	1.91684	2.11164	1.13572	1.98616	1.81031	1.70102	0.878575	2.14765	1.21362	2.40044	2.44764
Cell_0100	FOXO_TR	Glucose 17 mM + Glutamine 2.500000e-01 mM + Insulin 10000 ng/ml + EAA 1.000000e-01 X	2.27232	2.14823	3.69553	1.20785	1.68806	2.46921	2.46279	2.43332	1.35935	1.35867	2.97456	2.83041	2.58756	0.962346	1.8248	2.89784	1.78443	1.6502	1.39087	2.51945	2.09195	3.20109	1.26445	2.05659	2.62637	2.96518	3.12508	1.27963	1.56022	2.35425	1.84234	2.79718	1.25705	3.44151	3.03739	1.65682	2.17599	2.04571	2.81919	2.16519	2.54603	0.881499	1.79637	2.8047	2.2846	2.81044	1.65992
Cell_0100	AMPKARt2	Glucose 17 mM + Glutamine 2.500000e-01 mM + Insulin 10000 ng/ml + EAA 1.000000e-01 X	0.573158	0.549797	0.504047	0.558421	0.758633	0.631902	0.507715	0.534827	0.436466	0.439366	0.504712	0.679841	0.581253	0.597272	0.595981	0.633376	0.558123	0.67935	0.663937	0.526505	0.587369	0.553719	0.648767	0.527823	0.544448	0.667195	0.592463	0.629992	0.657398	0.487714	0.655147	0.642194	0.624908	0.648274	0.616264	0.603935	0.660432	0.465721	0.566447	0.528962	0.548311	0.476439	0.588618	0.594825	0.542015	0.531035	0.610884
Cell_0101	TFEB_TR	Glucose 17 mM + Glutamine 2.500000e-01 mM + Insulin 10000 ng/ml + EAA 1.000000e-01 X	1.27731	1.59133	2.56276	1.06755	0.819772	2.01499	1.99975	1.67591	1.18743	1.21343	1.9248	2.28361	1.81551	0.700007	1.10563	1.95442	0.890369	1.3666	1.02129	1.67357	1.25251	2.52955	1.12412	1.26716	1.66722	1.87383	2.15428	1.25479	1.17245	2.61122	2.60209	1.94515	1.12568	2.05382	2.21847	1.17889	2.16842	2.15584	1.09843	1.90566	1.81044	1.67521	0.876864	2.09363	1.15658	1.90743	2.49617
Cell_0101	FOXO_TR	Glucose 17 mM + Glutamine 2.500000e-01 mM + Insulin 10000 ng/ml + EAA 1.000000e-01 X	2.32943	2.25234	3.60348	1.18768	1.5879	2.51268	2.45044	2.45505	1.29879	1.3541	2.87803	2.77804	2.64306	0.970632	1.61246	2.91761	1.90479	2.33813	1.33907	2.47745	2.22845	3.25223	1.3307	1.9744	2.75222	2.94623	3.22026	1.30647	1.55867	2.31942	1.75634	2.78748	1.28137	3.42141	3.06614	1.83092	1.93861	1.89742	2.68524	2.12483	2.55543	0.868171	1.79787	2.76813	2.35263	2.68732	1.59667
Cell_0101	AMPKARt2	Glucose 17 mM + Glutamine 2.500000e-01 mM + Insulin 10000 ng/ml + EAA 1.000000e-01 X	0.566845	0.567559	0.507747	0.562069	0.733605	0.630157	0.504811	0.539274	0.447077	0.423623	0.503077	0.67711	0.577587	0.607342	0.63696	0.632682	0.545898	0.654682	0.678749	0.532491	0.602215	0.560697	0.64923	0.517593	0.519537	0.658821	0.589804	0.632869	0.65714	0.484575	0.677338	0.632312	0.62879	0.636569	0.611675	0.605825	0.668593	0.432391	0.580012	0.533826	0.543902	0.457422	0.600529	0.598221	0.533769	0.532861	0.616723
Cell_0102	TFEB_TR	Glucose 17 mM + Glutamine 2.500000e-01 mM + Insulin 10000 ng/ml + EAA 1.000000e-01 X	1.44113	1.5081	2.53697	1.01891	0.804984	2.12065	1.97481	1.47974	1.43234	1.24881	1.87074	1.89476	1.87165	0.953887	1.04857	1.85441	0.902681	1.45866	0.954579	1.60015	1.6045	2.41193	1.04938	1.26023	2.11223	1.93692	2.70506	1.37212	1.14572	2.84115	2.76796	1.94891	1.16773	2.19338	2.09061	1.18927	1.94328	2.16006	1.08066	1.86585	1.90979	1.47579	0.841132	2.49382	1.14764	1.47599	2.47495
Cell_0102	FOXO_TR	Glucose 17 mM + Glutamine 2.500000e-01 mM + Insulin 10000 ng/ml + EAA 1.000000e-01 X	2.36198	2.21381	3.55398	1.16401	1.56719	2.37838	2.39783	2.37	1.27709	1.3444	2.78748	2.7499	2.85554	1.01558	1.61121	2.90148	2.05304	2.75556	1.3452	2.48972	2.31173	3.32576	1.35493	1.88166	2.74504	2.91664	3.30361	1.31458	1.54657	2.26618	1.70578	2.74267	1.28491	3.42108	3.15283	2.17559	2.15667	1.80338	2.67511	2.14006	2.55088	0.870388	1.6942	2.68373	2.36826	2.36276	1.534
Cell_0102	AMPKARt2	Glucose 17 mM + Glutamine 2.500000e-01 mM + Insulin 10000 ng/ml + EAA 1.000000e-01 X	0.560739	0.577714	0.508509	0.566831	0.702437	0.632194	0.512607	0.532894	0.442279	0.442319	0.506597	0.682158	0.567487	0.602193	0.656298	0.630385	0.528954	0.63136	0.680657	0.557152	0.624686	0.556399	0.653756	0.522777	0.493753	0.664615	0.581472	0.647271	0.656481	0.486674	0.690146	0.594031	0.619218	0.635335	0.604587	0.591137	0.677463	0.431343	0.583639	0.535476	0.530031	0.499841	0.597958	0.605016	0.53839	0.527377	0.603828
Cell_0103	TFEB_TR	Glucose 17 mM + Glutamine 2.500000e-01 mM + Insulin 10000 ng/ml + EAA 1.000000e-01 X	1.49737	1.50563	2.56794	1.02376	0.835359	2.50212	2.00174	1.16077	1.38212	1.27932	2.02742	2.13623	1.90601	1.34763	1.015	2.40483	0.987246	1.58155	1.03676	1.40421	1.70633	2.25523	0.989248	1.24927	2.05456	1.92746	2.77779	1.37563	1.07026	2.45959	2.52514	1.95386	1.14849	0.578003	2.1974	1.0061	1.76567	2.26904	1.07007	1.86624	2.08273	1.43495	0.841404	2.59299	1.12054	1.35622	2.37479
Cell_0103	FOXO_TR	Glucose 17 mM + Glutamine 2.500000e-01 mM + Insulin 10000 ng/ml + EAA 1.000000e-01 X	2.27768	2.19679	3.4207	1.18027	1.54806	2.36537	2.32924	2.24191	1.26284	1.35297	2.77038	2.71464	2.90155	1.0091	1.5636	2.94076	2.11381	2.88619	1.28784	2.50729	2.39499	3.28052	1.3299	1.86214	2.72993	2.99905	3.37654	1.32365	1.52105	2.15647	1.7859	2.81887	1.22418	1.90818	3.10707	2.01256	2.70272	1.68625	2.59016	2.18502	2.45721	0.832115	1.66181	2.55426	2.23938	2.1457	1.54157
Cell_0103	AMPKARt2	Glucose 17 mM + Glutamine 2.500000e-01 mM + Insulin 10000 ng/ml + EAA 1.000000e-01 X	0.568863	0.597097	0.528415	0.579482	0.683004	0.626236	0.513064	0.533375	0.42571	0.463465	0.52628	0.689692	0.564525	0.590808	0.660183	0.634932	0.532049	0.636662	0.67647	0.565743	0.612577	0.558172	0.650897	0.527334	0.494792	0.637098	0.563918	0.647798	0.655357	0.4993	0.688231	0.578326	0.616055	0.679837	0.610817	0.577496	0.656788	0.419464	0.604849	0.527094	0.535185	0.535531	0.5989	0.607938	0.547462	0.500052	0.599185
Cell_0104	TFEB_TR	Glucose 17 mM + Glutamine 2.500000e-01 mM + Insulin 10000 ng/ml + EAA 1.000000e-01 X	1.28525	1.83348	2.45652	1.07285	0.876451	2.30888	2.02357	1.33591	0.973142	1.24795	2.04958	2.11314	1.82658	1.27512	0.980496	3.17707	1.14684	1.56782	1.19428	1.75581	1.87283	2.30342	0.976005	1.22926	1.83302	1.75526	3.65927	1.26916	1.08342	2.41681	2.33783	2.02723	1.17054	0.624607	2.36966	0.814961	1.97879	2.45136	1.06705	1.86857	1.87015	1.60624	0.840106	2.21265	1.07732	1.35964	2.26894
Cell_0104	FOXO_TR	Glucose 17 mM + Glutamine 2.500000e-01 mM + Insulin 10000 ng/ml + EAA 1.000000e-01 X	2.16879	2.25763	3.30473	1.42199	1.47864	2.4743	2.2578	2.22106	1.26519	1.33644	2.77535	2.67673	2.81783	0.93688	1.56122	3.03233	2.05082	2.92277	1.25714	2.52508	2.51519	3.15738	1.25443	1.92521	2.89055	3.13496	3.3132	1.32301	1.48719	2.10918	1.8195	2.93005	1.19189	1.79884	3.01245	1.65788	2.93903	1.59766	2.54981	2.16385	2.42587	0.809479	1.60757	2.49832	2.14467	2.11357	1.55689
Cell_0104	AMPKARt2	Glucose 17 mM + Glutamine 2.500000e-01 mM + Insulin 10000 ng/ml + EAA 1.000000e-01 X	0.568021	0.600663	0.527001	0.596879	0.692245	0.616276	0.506566	0.546324	0.428616	0.454346	0.550817	0.685977	0.557664	0.600966	0.665659	0.636516	0.554291	0.646353	0.683238	0.550375	0.597431	0.565267	0.6497	0.514299	0.484956	0.605748	0.540634	0.638658	0.654993	0.499268	0.672714	0.583209	0.623886	0.690528	0.615862	0.62428	0.613434	0.398446	0.632721	0.521551	0.549053	0.512664	0.622975	0.613364	0.546268	0.480734	0.609767
Cell_0105	TFEB_TR	Glucose 17 mM + Glutamine 2.500000e-01 mM + Insulin 10000 ng/ml + EAA 1.000000e-01 X	0.61904	1.86305	2.2905	1.09901	0.971008	1.9294	1.94439	1.26043	0.873172	1.23967	1.82046	1.75751	1.74555	0.914058	1.01046	2.88631	1.2085	1.57512	1.22703	2.17772	2.28479	2.46215	0.973749	1.25915	1.75056	1.69655	4.48718	1.16256	1.10734	2.5329	2.6763	2.08089	1.34527	0.619726	2.42219	0.840614	1.95291	2.39205	1.07124	1.87993	1.6879	1.60968	0.792533	2.03247	0.993466	1.40977	2.19598
Cell_0105	FOXO_TR	Glucose 17 mM + Glutamine 2.500000e-01 mM + Insulin 10000 ng/ml + EAA 1.000000e-01 X	1.30859	2.27568	3.27572	1.90159	1.4688	2.42102	2.20174	2.24143	1.20881	1.30573	2.80048	2.71642	2.89072	0.939902	1.62235	3.08919	2.04955	2.92613	1.31675	2.60564	2.52517	3.09639	1.33581	1.97758	2.96367	3.17935	3.26705	1.31018	1.48342	2.20519	1.70382	2.90307	1.21987	1.72336	3.03149	1.65646	2.87582	1.54117	2.676	2.10698	2.50591	0.872228	1.49077	2.47953	2.10002	2.14003	1.54444
Cell_0105	AMPKARt2	Glucose 17 mM + Glutamine 2.500000e-01 mM + Insulin 10000 ng/ml + EAA 1.000000e-01 X	0.605905	0.590171	0.506041	0.593062	0.719252	0.618241	0.505323	0.557126	0.450655	0.454377	0.558266	0.674647	0.539081	0.623721	0.670445	0.634865	0.562388	0.641693	0.690543	0.538482	0.611701	0.555866	0.65481	0.492527	0.468355	0.610037	0.530719	0.653051	0.657118	0.492657	0.652502	0.578495	0.631203	0.692988	0.612198	0.685924	0.590619	0.398119	0.61628	0.523384	0.565441	0.501375	0.635513	0.619048	0.540186	0.479422	0.610163
Cell_0106	TFEB_TR	Glucose 17 mM + Glutamine 2.500000e-01 mM + Insulin 10000 ng/ml + EAA 1.000000e-01 X	0.607466	1.68637	2.38109	1.09507	1.06609	2.00553	2.04458	1.00221	1.11669	1.28154	1.86459	1.72653	1.80689	0.708266	1.09569	1.8994	1.18983	1.72363	1.20343	1.9589	2.03979	2.33333	1.04748	1.33617	1.61796	1.77412	3.86638	1.11771	1.07704	1.92648	3.01074	1.96401	1.50495	0.587193	2.42969	1.00813	1.70991	2.38235	1.03282	1.87487	1.75182	1.53577	0.773992	2.1593	1.02036	1.54755	2.18845
Cell_0106	FOXO_TR	Glucose 17 mM + Glutamine 2.500000e-01 mM + Insulin 10000 ng/ml + EAA 1.000000e-01 X	1.28797	2.22333	3.27095	2.30077	1.48582	2.23377	2.18854	2.2157	1.13444	1.31468	2.81809	2.78461	3.01902	0.996845	1.66015	3.11134	2.16998	2.98442	1.37675	2.68075	2.34449	3.01948	1.8465	1.90766	2.82454	3.10524	3.39044	1.32038	1.4891	2.27332	1.63371	2.89591	1.20313	1.73439	3.11314	1.7274	2.82246	1.54285	2.66915	2.08911	2.53791	0.876497	1.44408	2.45731	2.13296	2.21689	1.52423
Cell_0106	AMPKARt2	Glucose 17 mM + Glutamine 2.500000e-01 mM + Insulin 10000 ng/ml + EAA 1.000000e-01 X	0.599424	0.594262	0.508484	0.573033	0.72374	0.629881	0.512679	0.554877	0.451699	0.478665	0.550807	0.670211	0.538846	0.631411	0.659295	0.637864	0.555038	0.634303	0.675234	0.522871	0.624896	0.539584	0.651028	0.491086	0.482676	0.60244	0.527452	0.670522	0.655696	0.498903	0.639642	0.565679	0.638021	0.689084	0.624271	0.671477	0.574262	0.403996	0.594097	0.535968	0.587865	0.527566	0.618449	0.624434	0.535689	0.4763	0.610082
Cell_0107	TFEB_TR	Glucose 17 mM + Glutamine 2.500000e-01 mM + Insulin 10000 ng/ml + EAA 1.000000e-01 X	0.623205	1.58591	2.54998	1.10326	1.11174	2.17525	2.09372	1.19093	1.15307	1.23507	1.97325	1.7567	1.95576	0.54699	1.08174	1.5638	1.18181	1.70583	1.24644	0.815316	1.30553	1.91061	1.16316	1.39046	1.6183	1.74546	3.33355	1.07005	1.08975	1.3859	2.83126	1.89718	1.36947	0.593382	2.26993	1.12029	1.71572	2.72085	0.969368	1.85908	1.65453	1.59897	0.785721	2.16876	1.1647	1.62065	2.15067
Cell_0107	FOXO_TR	Glucose 17 mM + Glutamine 2.500000e-01 mM + Insulin 10000 ng/ml + EAA 1.000000e-01 X	1.29175	2.15911	3.25388	2.40545	1.42482	2.22705	2.18261	2.29283	1.20759	1.33758	2.8184	2.77787	3.08575	0.979382	1.667	3.12208	2.15601	3.0213	1.41115	1.15368	2.18872	2.93955	2.53571	1.72089	2.79757	2.98423	3.4542	1.32751	1.47626	2.18303	1.63575	3.01949	1.11712	1.7795	3.17742	1.68245	2.78455	1.5917	2.47843	2.11932	2.51056	0.867273	1.40467	2.49366	2.3105	2.34209	1.49731
Cell_0107	AMPKARt2	Glucose 17 mM + Glutamine 2.500000e-01 mM + Insulin 10000 ng/ml + EAA 1.000000e-01 X	0.599206	0.604446	0.516269	0.570338	0.702793	0.640723	0.527093	0.552538	0.439328	0.486773	0.550882	0.677289	0.546743	0.622628	0.652658	0.633848	0.554324	0.628439	0.650821	0.521481	0.62068	0.543931	0.639977	0.497878	0.497997	0.576519	0.507844	0.665522	0.654656	0.502401	0.633386	0.566983	0.639209	0.694423	0.652586	0.629905	0.563577	0.399959	0.592553	0.552811	0.587006	0.539421	0.614038	0.625019	0.532666	0.473582	0.635953
Cell_0108	TFEB_TR	Glucose 17 mM + Glutamine 2.500000e-01 mM + Insulin 10000 ng/ml + EAA 1.000000e-01 X	0.630491	1.39573	2.54132	1.11101	1.12803	2.12622	1.98674	1.3462	1.11303	1.15	1.74338	1.62924	2.05956	0.567707	0.984525	1.99556	1.10912	1.5582	1.23309	0.812605	1.20548	1.72163	1.12726	1.41521	1.83086	1.75556	3.26892	1.03736	1.136	1.78427	2.44274	1.97047	1.17799	0.612339	1.9805	1.1127	1.81476	2.82214	0.957348	1.88949	1.60793	1.59538	0.753396	2.02079	1.21218	1.69578	2.01824
Cell_0108	FOXO_TR	Glucose 17 mM + Glutamine 2.500000e-01 mM + Insulin 10000 ng/ml + EAA 1.000000e-01 X	1.27692	2.13154	3.15836	2.34436	1.35171	2.34286	2.14506	2.45345	1.28471	1.3185	2.87659	2.74456	3.21491	0.953886	1.66007	3.12567	1.95873	2.84206	1.44302	1.18458	2.23149	3.01368	2.8898	1.53819	2.87002	2.91043	3.35093	1.2923	1.48489	2.0967	1.54387	3.11614	1.07485	1.76508	3.25716	1.67215	2.76099	1.57991	2.40421	2.20569	2.47893	1.22884	1.27752	2.53659	2.50345	2.42774	1.481
Cell_0108	AMPKARt2	Glucose 17 mM + Glutamine 2.500000e-01 mM + Insulin 10000 ng/ml + EAA 1.000000e-01 X	0.610751	0.609383	0.509426	0.576344	0.695669	0.659428	0.53688	0.566641	0.459563	0.461668	0.560593	0.683732	0.532337	0.618289	0.662135	0.621633	0.551746	0.623462	0.650031	0.541371	0.628135	0.570734	0.633826	0.485804	0.499261	0.580717	0.505217	0.660738	0.654653	0.494663	0.626458	0.572905	0.635691	0.701195	0.667736	0.634656	0.584639	0.390809	0.575565	0.556622	0.567054	0.537599	0.626189	0.614502	0.53404	0.478061	0.654884
Cell_0109	TFEB_TR	Glucose 17 mM + Glutamine 2.500000e-01 mM + Insulin 10000 ng/ml + EAA 1.000000e-01 X	0.616551	1.40582	2.55155	1.09005	1.11313	1.92568	2.12568	1.18704	1.22702	1.18785	1.70368	1.69873	2.07588	0.876794	0.957759	2.58547	1.11369	1.58791	1.16533	0.837425	1.39963	1.92108	1.18305	1.41981	1.73774	1.93748	2.60533	1.04626	1.13769	2.26111	2.23928	1.90926	1.16043	0.594132	1.94431	1.03421	1.84702	2.45047	0.5238	1.91576	1.83136	1.54645	0.723032	2.01917	1.23505	1.83469	2.01218
Cell_0109	FOXO_TR	Glucose 17 mM + Glutamine 2.500000e-01 mM + Insulin 10000 ng/ml + EAA 1.000000e-01 X	1.23519	2.15808	3.01706	2.28069	1.31555	2.315	2.09755	2.46271	1.27445	1.26296	2.88337	2.74279	3.32462	0.972044	1.61076	3.15202	1.85534	2.68502	1.45066	1.20448	2.32396	3.08101	2.81748	1.43838	2.76223	2.9105	3.32793	1.25424	1.50874	2.1236	1.43015	3.10267	1.07401	1.73519	3.32062	1.648	2.76282	1.5372	1.37552	2.292	2.47332	1.88664	1.15402	2.51564	2.65333	2.44594	1.45567
Cell_0109	AMPKARt2	Glucose 17 mM + Glutamine 2.500000e-01 mM + Insulin 10000 ng/ml + EAA 1.000000e-01 X	0.614644	0.611442	0.507904	0.564251	0.70612	0.679903	0.534239	0.581016	0.488838	0.430735	0.563544	0.679187	0.51518	0.627064	0.664472	0.619476	0.54082	0.623253	0.670587	0.529489	0.645143	0.594988	0.628388	0.474244	0.520344	0.601816	0.527834	0.661976	0.640924	0.492546	0.618309	0.561303	0.648332	0.699046	0.661079	0.6443	0.608795	0.386144	0.632361	0.556091	0.562399	0.514103	0.616687	0.604108	0.535497	0.479194	0.642763
Cell_0110	TFEB_TR	Glucose 17 mM + Glutamine 2.500000e-01 mM + Insulin 10000 ng/ml + EAA 1.000000e-01 X	0.622848	1.55906	2.69363	1.06018	1.09005	1.75637	2.10994	1.106	1.15772	1.24475	2.00565	1.90875	2.04455	0.889461	0.989813	2.87732	1.26289	1.6217	1.16535	0.841685	1.36343	2.22248	1.48136	1.43172	1.52257	2.01281	2.48495	1.00357	1.13267	2.0038	2.20768	1.88529	1.08111	0.58106	2.22485	0.970135	1.77618	2.41999	0.528947	1.86312	2.03296	1.63628	0.759351	2.15122	1.30954	1.62502	2.10953
Cell_0110	FOXO_TR	Glucose 17 mM + Glutamine 2.500000e-01 mM + Insulin 10000 ng/ml + EAA 1.000000e-01 X	1.21429	2.15991	2.96801	2.21913	1.26349	2.24745	2.09994	2.4142	1.56994	1.21675	2.77273	2.75264	3.30929	0.949369	1.55993	3.16948	1.93186	2.85412	1.443	1.2185	2.32739	2.96785	2.66615	1.39648	2.59911	2.88234	3.39773	1.2521	1.49498	2.11456	1.41602	3.12978	1.04709	1.76774	3.31805	1.59943	2.71123	1.55296	1.35736	2.25706	2.55788	2.27405	1.07715	2.51159	2.76848	2.43678	1.4394
Cell_0110	AMPKARt2	Glucose 17 mM + Glutamine 2.500000e-01 mM + Insulin 10000 ng/ml + EAA 1.000000e-01 X	0.601874	0.605273	0.516716	0.554233	0.705323	0.675569	0.534595	0.577529	0.455307	0.419187	0.560373	0.673675	0.511402	0.631131	0.659745	0.624286	0.540221	0.62502	0.685685	0.520131	0.637425	0.594659	0.624027	0.473761	0.537899	0.607549	0.524468	0.65784	0.623896	0.500408	0.613312	0.547887	0.669301	0.704737	0.649442	0.628457	0.607961	0.388464	0.621383	0.561512	0.566649	0.443702	0.596895	0.604662	0.532979	0.481246	0.641828
Cell_0111	TFEB_TR	Glucose 17 mM + Glutamine 2.500000e-01 mM + Insulin 10000 ng/ml + EAA 1.000000e-01 X	0.649757	1.3877	2.6845	1.04252	1.09781	0.977859	1.81343	0.994141	0.927508	1.22722	2.10103	1.91714	2.00838	0.7032	1.01033	2.51303	1.24555	1.56661	1.19602	0.814076	1.53156	2.34217	1.55059	1.51252	1.70508	1.93689	3.22525	0.968846	1.14948	1.74071	2.14848	2.08159	0.964064	0.58052	2.48592	1.00113	1.53658	2.84359	0.538738	1.78672	2.08907	1.71721	0.802259	2.08409	1.26588	1.19454	1.95775
Cell_0111	FOXO_TR	Glucose 17 mM + Glutamine 2.500000e-01 mM + Insulin 10000 ng/ml + EAA 1.000000e-01 X	1.22725	2.1146	2.99629	2.16357	1.23091	2.05467	2.19207	2.49235	2.18186	1.20468	2.80072	2.74837	3.24743	0.938044	1.57949	3.18924	2.03641	3.04841	1.45856	1.21948	2.3553	2.86552	2.64818	1.378	2.56727	2.78069	3.32322	1.34198	1.4442	2.00285	1.43387	3.26787	1.05926	1.81491	3.34469	1.60477	2.61192	1.56283	1.38706	2.13752	2.61827	2.30985	1.0118	2.54243	2.67781	2.41404	1.48562
Cell_0111	AMPKARt2	Glucose 17 mM + Glutamine 2.500000e-01 mM + Insulin 10000 ng/ml + EAA 1.000000e-01 X	0.600298	0.604232	0.528016	0.549383	0.695735	0.677986	0.539664	0.576326	0.373941	0.417326	0.551883	0.675615	0.511852	0.625414	0.665571	0.623248	0.545989	0.621812	0.685171	0.525161	0.622494	0.57825	0.621834	0.461334	0.516668	0.609953	0.515051	0.658735	0.622679	0.506765	0.614047	0.551019	0.668807	0.714796	0.647248	0.617813	0.601871	0.383965	0.633102	0.556534	0.575681	0.403664	0.600127	0.611169	0.539562	0.485434	0.655954
Cell_0112	TFEB_TR	Glucose 17 mM + Glutamine 2.500000e-01 mM + Insulin 10000 ng/ml + EAA 1.000000e-01 X	0.658563	1.30568	2.48739	1.03565	1.15063	0.943538	2.09066	0.857358	0.963897	1.25068	2.03963	1.78239	2.01697	0.978885	1.07064	2.00062	1.15249	1.7196	1.21891	0.800205	1.74749	2.02214	1.37716	1.60133	1.80085	1.9642	3.03156	1.07262	1.16231	2.24281	2.09216	2.06099	0.990263	0.566218	2.59161	1.10854	1.48847	2.82883	0.566554	1.74044	2.02474	1.7709	0.79733	1.9032	1.16044	1.45095	1.72696
Cell_0112	FOXO_TR	Glucose 17 mM + Glutamine 2.500000e-01 mM + Insulin 10000 ng/ml + EAA 1.000000e-01 X	1.23942	2.11456	3.00062	2.16028	1.27262	2.06616	2.27213	2.54471	2.48832	1.18288	2.96821	2.71627	3.12471	1.03934	1.62551	3.30909	2.09999	3.01282	1.48967	1.18823	2.46033	2.85981	2.52504	1.36925	2.57689	2.69833	3.22988	1.66418	1.36989	1.95387	1.4618	3.26647	1.11606	1.82341	3.39865	1.60242	2.52152	1.53736	1.4429	2.09686	2.51692	2.35631	0.963389	2.51676	2.46084	2.40311	1.41746
Cell_0112	AMPKARt2	Glucose 17 mM + Glutamine 2.500000e-01 mM + Insulin 10000 ng/ml + EAA 1.000000e-01 X	0.61251	0.62045	0.536281	0.525841	0.696387	0.693437	0.529323	0.596388	0.334952	0.408646	0.533981	0.673599	0.521067	0.630668	0.672148	0.623835	0.542985	0.615543	0.681196	0.522214	0.634468	0.571491	0.615611	0.447702	0.501331	0.61742	0.533039	0.656195	0.620064	0.49768	0.613813	0.556596	0.655649	0.718419	0.654194	0.612888	0.605172	0.374569	0.637222	0.545359	0.600621	0.452934	0.618735	0.613595	0.55842	0.476296	0.653268
Cell_0113	TFEB_TR	Glucose 17 mM + Glutamine 2.500000e-01 mM + Insulin 10000 ng/ml + EAA 1.000000e-01 X	0.659644	1.47076	2.44004	1.02702	1.23848	0.94018	2.4979	1.03075	1.17234	1.2895	2.06485	1.8121	2.13255	1.2748	1.12799	2.28721	1.28337	1.93407	1.21971	0.801706	1.74747	1.64914	1.32943	1.615	1.78138	1.95831	2.24698	1.18149	1.20283	2.62659	2.25546	1.83942	1.02369	0.587852	2.69529	1.16076	1.77725	2.49399	0.595329	1.71045	1.99893	1.89704	0.800504	1.92183	1.0991	2.07428	1.73723
Cell_0113	FOXO_TR	Glucose 17 mM + Glutamine 2.500000e-01 mM + Insulin 10000 ng/ml + EAA 1.000000e-01 X	1.2331	2.09619	2.94644	2.1321	1.30255	2.04764	2.25269	2.51461	2.38717	1.11891	2.95839	2.68514	2.99951	1.12077	1.61269	3.42874	2.16556	2.99646	1.50851	1.14608	2.48135	2.84175	2.28972	1.35324	1.10323	2.64441	3.36669	2.17231	1.27513	2.02685	1.50682	3.10173	1.11589	1.82805	3.34842	1.59315	2.45233	1.54384	1.48347	2.15676	2.39647	2.44206	0.933921	2.42595	2.41401	2.46821	1.34014
Cell_0113	AMPKARt2	Glucose 17 mM + Glutamine 2.500000e-01 mM + Insulin 10000 ng/ml + EAA 1.000000e-01 X	0.608701	0.628276	0.538394	0.518783	0.698812	0.698199	0.516596	0.61755	0.351345	0.408088	0.523071	0.669503	0.533574	0.643002	0.662979	0.632193	0.552604	0.615661	0.68557	0.522497	0.644444	0.581342	0.614831	0.457063	0.465144	0.621229	0.540773	0.643936	0.606642	0.479814	0.606726	0.56387	0.655012	0.720956	0.655355	0.604657	0.601631	0.377369	0.635227	0.548382	0.617918	0.515849	0.631827	0.602803	0.57214	0.47165	0.659072
Cell_0114	TFEB_TR	Glucose 17 mM + Glutamine 2.500000e-01 mM + Insulin 10000 ng/ml + EAA 1.000000e-01 X	0.670927	1.34542	2.48795	0.999299	1.28871	0.902209	2.24025	1.27744	1.25161	1.24669	2.04435	1.898	2.20137	1.08679	1.07549	2.85036	1.35071	1.83351	1.1859	0.797179	1.80185	1.79419	1.26113	1.62661	1.80197	1.67086	2.52364	1.2369	1.30469	1.97662	2.39633	1.93428	1.0034	0.629948	2.77241	1.11439	1.95505	2.58453	0.604602	1.69641	2.13421	1.85613	0.83939	1.89275	1.00524	1.82008	1.80434
Cell_0114	FOXO_TR	Glucose 17 mM + Glutamine 2.500000e-01 mM + Insulin 10000 ng/ml + EAA 1.000000e-01 X	1.2276	2.02651	2.88174	1.96492	1.2515	2.07352	2.26547	2.56325	2.32848	1.0803	2.85865	2.64539	3.02645	1.01523	1.55105	3.40216	2.25085	2.99916	1.50998	1.14029	2.39814	2.81564	2.36035	1.33484	1.09609	2.57167	3.51923	2.51862	1.18345	2.05342	1.50435	3.16765	1.08423	1.8201	3.28538	1.63502	2.399	1.56932	1.50763	2.19018	2.38985	2.3815	0.918921	2.33311	2.39393	2.56222	1.9027
Cell_0114	AMPKARt2	Glucose 17 mM + Glutamine 2.500000e-01 mM + Insulin 10000 ng/ml + EAA 1.000000e-01 X	0.601091	0.617898	0.539895	0.534144	0.693919	0.701241	0.529393	0.619759	0.363812	0.417068	0.521053	0.678055	0.533629	0.646157	0.640783	0.636264	0.578075	0.622254	0.692094	0.538937	0.633593	0.588854	0.618712	0.471535	0.48606	0.62526	0.545925	0.654395	0.598597	0.479732	0.601651	0.578612	0.66269	0.703497	0.647018	0.60636	0.578837	0.378171	0.646871	0.558687	0.606375	0.532724	0.633893	0.589559	0.571828	0.48732	0.673111
Cell_0115	TFEB_TR	Glucose 17 mM + Glutamine 2.500000e-01 mM + Insulin 10000 ng/ml + EAA 1.000000e-01 X	0.667563	1.22766	2.40771	0.967357	1.30094	0.874853	2.13904	1.49996	1.3782	1.24217	2.05109	1.66645	2.05027	0.842054	1.10166	2.60279	1.17878	1.61278	1.19131	0.79655	1.68854	1.94144	1.14579	1.66867	1.7759	1.44514	3.20448	1.40082	1.41076	1.7279	2.25872	2.18302	1.04392	0.609059	2.68091	1.08941	1.85815	2.74378	0.609009	1.68924	2.15324	1.61371	0.851445	0.580001	0.986527	1.53146	2.04452
Cell_0115	FOXO_TR	Glucose 17 mM + Glutamine 2.500000e-01 mM + Insulin 10000 ng/ml + EAA 1.000000e-01 X	1.21818	2.11532	2.91331	1.75685	1.21636	2.13272	2.33118	2.64163	2.35236	1.09688	2.97683	2.57077	3.13238	0.900529	1.50514	3.35662	2.30971	2.85666	1.51258	1.16938	2.36368	2.7143	2.53721	1.32975	1.10931	2.57833	3.45605	2.6008	1.11952	2.02851	1.49532	3.35796	1.09171	1.73465	3.32395	1.65046	2.38769	1.58753	1.5634	2.15144	2.42488	2.2481	0.89851	2.15456	2.29654	2.57789	2.95606
Cell_0115	AMPKARt2	Glucose 17 mM + Glutamine 2.500000e-01 mM + Insulin 10000 ng/ml + EAA 1.000000e-01 X	0.615406	0.612801	0.541338	0.513389	0.696391	0.702687	0.549194	0.616904	0.374265	0.403501	0.509549	0.686684	0.52698	0.652893	0.628584	0.628928	0.573137	0.621213	0.695439	0.548491	0.628985	0.575913	0.611095	0.473932	0.483116	0.629318	0.57481	0.676337	0.59198	0.486454	0.60515	0.575303	0.665539	0.666291	0.6506	0.607918	0.567967	0.366974	0.642958	0.566441	0.583513	0.530072	0.628642	0.601736	0.563838	0.491789	0.648301
Cell_0116	TFEB_TR	Glucose 17 mM + Glutamine 2.500000e-01 mM + Insulin 10000 ng/ml + EAA 1.000000e-01 X	0.665053	1.4565	2.42706	0.957159	1.35457	0.933327	2.26623	1.8717	1.70889	1.35049	2.08383	1.42362	1.92699	0.843441	1.36698	1.86019	1.10409	1.56456	1.20389	0.803989	1.3926	1.70117	1.19359	1.68151	1.74774	1.60772	2.95645	1.50986	1.43948	2.94032	2.18662	2.18405	1.20485	0.574157	2.55678	1.12793	1.63296	2.57768	0.623973	1.67978	1.9912	1.53372	0.870831	0.607329	1.10027	2.55305	2.68864
Cell_0116	FOXO_TR	Glucose 17 mM + Glutamine 2.500000e-01 mM + Insulin 10000 ng/ml + EAA 1.000000e-01 X	1.19864	2.27662	3.00243	1.6636	1.26589	2.192	2.31002	2.62703	2.26664	1.1027	3.1794	2.58618	3.20329	1.10881	1.50806	3.37751	2.33035	2.85596	1.51035	1.19106	2.30461	2.4942	2.32351	1.32843	1.11389	2.69153	3.36351	2.69535	1.10516	2.12694	1.53107	3.24267	1.10478	1.59966	3.37701	1.60365	2.44009	1.61935	1.65417	2.14182	2.42005	2.19764	0.854443	2.20739	2.40337	2.56385	3.50329
Cell_0116	AMPKARt2	Glucose 17 mM + Glutamine 2.500000e-01 mM + Insulin 10000 ng/ml + EAA 1.000000e-01 X	0.611768	0.608336	0.538916	0.487625	0.705261	0.703755	0.551462	0.624482	0.408123	0.384251	0.503692	0.682597	0.5213	0.655061	0.645962	0.623962	0.545475	0.610199	0.706023	0.540901	0.62203	0.556784	0.603978	0.473791	0.477192	0.617215	0.592022	0.670581	0.580747	0.472602	0.613602	0.559462	0.667934	0.650134	0.661613	0.596698	0.581491	0.370672	0.625805	0.570077	0.573391	0.532449	0.628785	0.610869	0.563812	0.485779	0.62567
Cell_0117	TFEB_TR	Glucose 17 mM + Glutamine 2.500000e-01 mM + Insulin 10000 ng/ml + EAA 1.000000e-01 X	0.690779	1.59866	2.52646	0.946404	1.33146	0.986755	1.78174	1.84149	1.9489	1.41869	0.834651	1.63865	1.96882	1.14237	1.6638	1.52767	1.15411	1.64452	1.22347	0.814188	1.46854	1.60862	1.22966	1.67714	1.71181	1.75834	2.3272	1.39373	1.387	3.5206	2.20242	2.01408	1.33074	0.601834	2.51736	1.12665	1.48721	2.51294	0.644234	1.69302	1.94618	1.5802	0.958485	0.588732	1.13044	3.28394	3.1621
Cell_0117	FOXO_TR	Glucose 17 mM + Glutamine 2.500000e-01 mM + Insulin 10000 ng/ml + EAA 1.000000e-01 X	1.21287	2.19384	3.01437	1.62355	1.27623	2.28181	2.32579	2.57551	2.16401	1.08791	1.56672	2.70902	3.25452	1.54249	1.54516	3.3767	2.33218	3.10183	1.46128	1.19854	2.12158	2.39318	2.10847	1.31717	1.08687	2.68204	3.36298	2.80305	1.13094	2.25674	1.52587	3.07602	1.11988	1.49015	3.48998	1.57164	2.44311	1.65916	1.6974	2.21306	2.37764	2.16196	0.847645	2.17753	2.5024	2.55553	3.41937
Cell_0117	AMPKARt2	Glucose 17 mM + Glutamine 2.500000e-01 mM + Insulin 10000 ng/ml + EAA 1.000000e-01 X	0.553428	0.589424	0.532432	0.503132	0.702804	0.713204	0.552913	0.635734	0.421545	0.401735	0.691232	0.678053	0.519962	0.623364	0.667442	0.631554	0.551645	0.612932	0.715562	0.540867	0.607216	0.55532	0.606392	0.468972	0.479838	0.603305	0.59692	0.663265	0.57806	0.465354	0.623649	0.566693	0.677858	0.653782	0.648532	0.587514	0.579786	0.390906	0.641297	0.562309	0.574618	0.529799	0.63547	0.622444	0.576529	0.501148	0.656478
Cell_0118	TFEB_TR	Glucose 17 mM + Glutamine 2.500000e-01 mM + Insulin 10000 ng/ml + EAA 1.000000e-01 X	0.700835	1.58946	2.40474	0.916427	1.15008	0.991558	1.44501	1.32729	1.84412	1.37955	0.878685	1.8532	1.99424	1.48378	1.88726	2.09221	1.09712	1.82198	1.4124	0.841172	1.66217	1.61516	1.1539	1.67094	1.65252	1.62669	2.24833	1.39831	1.31732	2.49737	2.19762	1.82421	1.22231	0.651576	2.48835	1.07489	1.67515	2.57316	0.657607	1.72114	2.02859	1.48306	0.984086	0.556333	1.06203	2.57069	3.03485
Cell_0118	FOXO_TR	Glucose 17 mM + Glutamine 2.500000e-01 mM + Insulin 10000 ng/ml + EAA 1.000000e-01 X	1.23895	2.07198	3.03329	1.53198	1.16721	2.33632	2.47197	2.52675	2.16106	1.0803	1.63647	2.70197	3.27643	1.77703	1.56453	3.39644	2.28625	3.23949	1.44551	1.23462	2.06166	2.47184	2.30198	1.30986	1.05429	2.50549	3.33668	2.7489	1.12941	2.27439	1.48674	3.14139	1.29078	1.40263	3.63732	1.53646	2.32587	1.69493	1.68666	2.27942	2.37621	2.06258	0.889177	2.07044	2.27613	2.47243	3.29002
Cell_0118	AMPKARt2	Glucose 17 mM + Glutamine 2.500000e-01 mM + Insulin 10000 ng/ml + EAA 1.000000e-01 X	0.490207	0.57773	0.52095	0.503757	0.698827	0.716402	0.55981	0.640747	0.397316	0.4308	0.699024	0.674667	0.531031	0.591724	0.663185	0.638554	0.567826	0.632186	0.700842	0.54873	0.621731	0.562195	0.604079	0.457627	0.479416	0.622091	0.613262	0.66733	0.580243	0.481608	0.627589	0.574091	0.686364	0.653632	0.628513	0.584332	0.57102	0.398975	0.667124	0.554141	0.56633	0.510586	0.630814	0.626802	0.578864	0.517682	0.675594
Cell_0119	TFEB_TR	Glucose 17 mM + Glutamine 2.500000e-01 mM + Insulin 10000 ng/ml + EAA 1.000000e-01 X	0.70734	1.56288	2.37291	0.899638	1.10124	0.991664	1.8436	1.22486	1.52404	1.35163	0.886476	1.68976	2.12522	1.2855	1.99097	3.12343	1.05804	1.97077	1.57851	0.877687	1.5076	1.42767	1.14369	1.66333	1.62537	1.56626	2.40594	1.50416	1.30612	0.624528	2.51391	1.77778	1.20961	0.694079	2.57126	1.05836	1.87202	2.44577	0.664388	1.74244	2.09008	1.4317	0.908766	0.558272	1.03241	2.26597	2.765
Cell_0119	FOXO_TR	Glucose 17 mM + Glutamine 2.500000e-01 mM + Insulin 10000 ng/ml + EAA 1.000000e-01 X	1.20269	2.21021	3.15745	1.45543	1.11113	2.31247	2.50229	2.47676	2.21878	1.07128	1.64301	2.54841	3.24566	1.76914	1.51688	3.46283	2.26844	3.21215	1.52491	1.3059	2.21957	2.50003	2.45291	1.30751	1.03742	2.46019	3.27833	2.71047	1.09881	1.86155	1.49173	3.12287	1.76587	1.33039	3.54186	1.4381	2.25516	1.6956	1.69274	2.29671	2.43308	2.02654	0.878066	2.0113	2.15712	2.35753	3.2657
Cell_0119	AMPKARt2	Glucose 17 mM + Glutamine 2.500000e-01 mM + Insulin 10000 ng/ml + EAA 1.000000e-01 X	0.475008	0.581974	0.511564	0.483212	0.705931	0.707955	0.554924	0.635786	0.39595	0.444256	0.705034	0.672277	0.55373	0.60773	0.654006	0.637754	0.546172	0.633181	0.682312	0.53281	0.646471	0.562856	0.604163	0.459629	0.470583	0.645099	0.616492	0.651017	0.578523	0.683086	0.625179	0.561417	0.681956	0.654669	0.635713	0.58501	0.573152	0.392882	0.66031	0.559571	0.558931	0.496049	0.621376	0.629143	0.567407	0.515152	0.644741
Cell_0120	TFEB_TR	Glucose 17 mM + Glutamine 2.500000e-01 mM + Insulin 10000 ng/ml + EAA 1.000000e-01 X	0.797136	1.5592	2.59757	0.926094	1.28244	0.956369	1.9384	1.40301	1.38482	1.37701	0.983005	1.58623	2.29702	0.835922	1.84544	3.34143	1.17578	1.91616	1.47164	0.893907	1.49714	1.41093	1.23956	1.69089	1.65218	1.60376	2.33415	1.30851	1.38063	0.574151	2.72566	1.95408	1.48346	0.745346	2.75854	1.05072	1.68583	2.3792	0.681607	1.78208	2.03768	1.57068	0.908395	0.567596	0.995814	2.64634	2.80145
Cell_0120	FOXO_TR	Glucose 17 mM + Glutamine 2.500000e-01 mM + Insulin 10000 ng/ml + EAA 1.000000e-01 X	1.15879	2.33562	3.19575	1.46365	1.20818	2.3388	2.39614	2.47167	2.27173	1.07254	1.68078	2.47833	3.15885	1.79203	1.42941	3.4646	2.38709	3.18896	1.47531	1.34677	2.31206	2.45789	2.35851	1.27117	1.04688	2.53605	3.28691	2.75537	1.12556	1.82948	1.48528	2.94246	2.35115	1.30229	3.37265	1.34887	2.30192	1.67823	1.69363	2.32789	2.42359	2.08162	0.823359	2.0026	2.27185	2.30515	3.27159
Cell_0120	AMPKARt2	Glucose 17 mM + Glutamine 2.500000e-01 mM + Insulin 10000 ng/ml + EAA 1.000000e-01 X	0.484311	0.578827	0.51527	0.491147	0.70839	0.71183	0.546195	0.623444	0.415971	0.457448	0.709861	0.681876	0.577619	0.633626	0.652202	0.640804	0.52457	0.619648	0.694687	0.500527	0.631675	0.559722	0.611645	0.472208	0.462046	0.630529	0.600936	0.634484	0.591367	0.677593	0.630065	0.567488	0.671857	0.651056	0.643239	0.591074	0.549342	0.388299	0.649213	0.561191	0.581308	0.506544	0.627888	0.629152	0.56664	0.520266	0.622313
Cell_0121	TFEB_TR	Glucose 17 mM + Glutamine 2.500000e-01 mM + Insulin 10000 ng/ml + EAA 1.000000e-01 X	0.95174	1.87206	2.57283	0.994089	1.35895	0.945924	1.63735	1.1905	1.56878	1.37253	1.07825	1.61747	2.10223	0.836732	1.82438	2.85805	1.19366	1.87057	1.38909	0.924712	1.95983	1.51802	1.34535	1.71504	1.72077	1.46647	2.22775	1.23051	1.44136	0.573422	2.34589	1.99939	1.56151	0.803628	2.64962	0.993613	1.59019	2.70788	0.699857	1.82846	1.78449	1.62181	0.95654	0.552354	0.95067	2.0677	3.01898
Cell_0121	FOXO_TR	Glucose 17 mM + Glutamine 2.500000e-01 mM + Insulin 10000 ng/ml + EAA 1.000000e-01 X	1.17502	2.28506	3.03792	1.50129	1.27133	2.46339	2.39908	2.49287	2.28768	1.07478	1.73382	2.48558	3.04025	1.84262	1.39341	3.43507	2.47969	3.16055	1.40457	1.34133	2.3081	2.40372	2.41211	1.22432	1.0951	2.42225	3.33545	2.67758	1.17236	1.82419	1.47255	2.83193	2.69301	1.30062	3.50685	1.32114	2.32244	1.71686	1.64779	2.3855	2.3494	2.06452	0.810821	1.9596	2.16021	2.30747	3.23545
Cell_0121	AMPKARt2	Glucose 17 mM + Glutamine 2.500000e-01 mM + Insulin 10000 ng/ml + EAA 1.000000e-01 X	0.477235	0.56376	0.524336	0.499629	0.70459	0.71749	0.540998	0.61682	0.390742	0.460743	0.711782	0.691773	0.580095	0.621407	0.640572	0.644957	0.533784	0.625571	0.716488	0.484023	0.61115	0.553767	0.611417	0.470835	0.464704	0.618368	0.59287	0.639046	0.620493	0.682561	0.639222	0.590166	0.664398	0.636799	0.625182	0.582769	0.526483	0.388851	0.653752	0.549781	0.608391	0.51799	0.640529	0.617807	0.569025	0.538102	0.621993
Cell_0122	TFEB_TR	Glucose 17 mM + Glutamine 2.500000e-01 mM + Insulin 10000 ng/ml + EAA 1.000000e-01 X	1.0922	2.21084	2.38361	1.05883	1.30877	1.02258	1.72793	1.04799	1.59467	1.33219	1.04392	1.50761	1.85548	1.03174	2.1753	2.82484	0.968277	1.92317	1.46153	1.02599	2.16165	1.40073	1.31273	1.6814	1.78951	1.37541	2.27563	1.60214	1.39083	0.551871	2.16452	1.77981	1.60805	0.872967	2.26133	0.954593	1.81737	3.00348	0.683014	1.82704	1.61243	1.51696	0.904342	0.552363	1.00546	1.4075	3.08607
Cell_0122	FOXO_TR	Glucose 17 mM + Glutamine 2.500000e-01 mM + Insulin 10000 ng/ml + EAA 1.000000e-01 X	1.17122	2.31071	2.9381	1.51409	1.23887	2.54937	2.47248	2.49099	2.30769	1.05533	1.73644	2.43852	2.98374	1.84213	1.42161	3.46003	2.41932	3.14657	1.9275	1.35003	2.38513	2.27546	2.56489	1.21902	1.13059	2.27214	3.29262	2.57723	1.13515	1.78286	1.51532	2.74451	2.8165	1.29122	3.69207	1.26135	2.29177	1.69599	1.59261	2.39629	2.34981	1.99754	0.81307	1.94914	1.99238	2.32289	3.10535
Cell_0122	AMPKARt2	Glucose 17 mM + Glutamine 2.500000e-01 mM + Insulin 10000 ng/ml + EAA 1.000000e-01 X	0.455038	0.548084	0.5202	0.483697	0.707144	0.699589	0.524608	0.623735	0.349088	0.452367	0.705058	0.690589	0.549856	0.597512	0.632797	0.640304	0.543045	0.630446	0.71895	0.480377	0.632963	0.554738	0.611554	0.464049	0.466702	0.635917	0.594753	0.638148	0.630346	0.695834	0.638493	0.596891	0.658275	0.630415	0.615332	0.565206	0.543696	0.394074	0.642434	0.542469	0.609377	0.514588	0.65169	0.612638	0.564482	0.542781	0.608103
Cell_0123	TFEB_TR	Glucose 17 mM + Glutamine 2.500000e-01 mM + Insulin 10000 ng/ml + EAA 1.000000e-01 X	1.21118	2.04618	2.51097	1.07202	1.38013	1.03415	1.81524	1.24342	1.34367	1.33641	1.0167	1.49486	1.97732	0.962214	2.26809	0.932035	0.82694	1.80555	1.52952	1.14294	1.65995	1.30182	1.19876	1.6552	1.77807	1.44853	2.57225	1.70255	1.30929	0.524948	2.37523	1.74428	1.96709	0.923172	2.23383	0.971797	1.82603	2.68347	0.645439	1.79451	1.85191	1.44988	0.838168	0.587726	1.08647	2.03396	3.08906
Cell_0123	FOXO_TR	Glucose 17 mM + Glutamine 2.500000e-01 mM + Insulin 10000 ng/ml + EAA 1.000000e-01 X	1.10592	2.38086	3.03453	1.51956	1.24182	2.50902	2.47944	2.48824	2.3681	1.05748	1.77097	2.40215	3.06491	1.92614	1.42417	1.42326	2.36959	3.15699	2.85873	1.35182	2.463	2.2001	2.48831	1.19721	1.10152	2.34982	3.20546	2.57595	1.08548	1.74114	1.49359	2.61319	2.90083	1.27246	3.67394	1.16508	2.24833	1.64056	1.56224	2.34178	2.36297	1.98644	0.823965	2.00156	2.13554	2.282	3.02138
Cell_0123	AMPKARt2	Glucose 17 mM + Glutamine 2.500000e-01 mM + Insulin 10000 ng/ml + EAA 1.000000e-01 X	0.436683	0.54914	0.51045	0.475299	0.705917	0.681889	0.512477	0.632827	0.362687	0.461781	0.693483	0.691187	0.524736	0.594311	0.642049	0.61429	0.544074	0.617884	0.715847	0.475095	0.658745	0.560798	0.615558	0.468194	0.468532	0.642709	0.594647	0.630884	0.619247	0.699927	0.631967	0.603165	0.658569	0.633834	0.632999	0.571727	0.536502	0.4101	0.613021	0.542943	0.607939	0.509757	0.663301	0.619285	0.568855	0.528982	0.594081
Cell_0124	TFEB_TR	Glucose 17 mM + Glutamine 2.500000e-01 mM + Insulin 10000 ng/ml + EAA 1.000000e-01 X	1.33768	1.74378	2.67799	1.08628	1.4686	0.970665	1.65959	1.27731	1.314	1.35481	1.09308	1.65305	2.08268	0.889415	1.93942	0.977877	0.94834	1.71308	1.789	1.19706	1.49276	1.38983	1.20491	1.66865	1.71355	1.37693	3.2393	1.41531	1.28035	0.583297	2.27187	1.95038	1.94978	0.916886	2.59512	0.980309	1.60715	2.55974	0.64185	1.77912	2.08288	1.40385	0.861432	0.619	1.04812	2.49275	3.23119
Cell_0124	FOXO_TR	Glucose 17 mM + Glutamine 2.500000e-01 mM + Insulin 10000 ng/ml + EAA 1.000000e-01 X	1.07545	2.32644	3.06724	1.55665	1.24046	2.38235	2.46869	2.47131	2.45959	1.06856	1.83916	2.4216	3.21606	2.03797	1.37247	1.39606	2.36714	3.09983	3.30854	1.27597	2.49561	2.28336	2.39116	1.16984	1.06398	2.39222	3.23438	2.53543	1.10345	1.81283	1.39184	2.53704	2.88954	1.25576	3.64659	1.16013	2.14897	2.03916	1.56419	2.28682	2.27103	1.94363	0.868389	2.05504	2.33003	2.22589	2.96761
Cell_0124	AMPKARt2	Glucose 17 mM + Glutamine 2.500000e-01 mM + Insulin 10000 ng/ml + EAA 1.000000e-01 X	0.42661	0.579477	0.515908	0.479679	0.704243	0.675207	0.528825	0.628829	0.387554	0.477776	0.685894	0.691171	0.533744	0.597605	0.644001	0.635064	0.544964	0.623944	0.712429	0.461984	0.643382	0.550311	0.606156	0.468092	0.498175	0.640872	0.586299	0.6224	0.624593	0.694423	0.627438	0.616048	0.664667	0.633392	0.644649	0.582851	0.499556	0.430884	0.600183	0.544639	0.614998	0.506012	0.657562	0.612375	0.569636	0.512579	0.600395
Cell_0125	TFEB_TR	Glucose 17 mM + Glutamine 2.500000e-01 mM + Insulin 10000 ng/ml + EAA 1.000000e-01 X	1.47803	1.67852	2.57832	1.14723	1.44888	1.00726	1.82353	1.24802	1.33647	1.3151	1.16433	1.63778	2.07588	1.19438	1.86308	0.939156	1.06325	1.91533	2.11863	1.20795	2.13909	1.44036	1.14616	1.63094	1.67425	1.28113	3.59784	1.36387	1.26954	0.664217	2.18058	1.93707	1.56269	0.917063	0.907578	0.984962	1.59592	3.53211	0.680374	1.7858	1.83958	1.3447	0.913359	0.635285	1.01285	1.84401	3.14937
Cell_0125	FOXO_TR	Glucose 17 mM + Glutamine 2.500000e-01 mM + Insulin 10000 ng/ml + EAA 1.000000e-01 X	1.11187	2.29379	2.9216	1.59557	1.27253	2.22065	2.44339	2.4128	2.59613	1.04762	1.83454	2.38728	3.26523	1.99633	1.32849	1.42478	2.32461	3.00136	3.28993	1.17149	2.55916	2.3178	2.49164	1.20761	1.0625	2.28784	3.26711	2.51923	1.10966	1.91343	1.41508	2.5183	2.80404	1.24807	1.83459	1.22142	2.09955	2.86957	1.5799	2.27293	2.19875	1.88885	0.868724	2.1353	2.39295	2.29279	2.83622
Cell_0125	AMPKARt2	Glucose 17 mM + Glutamine 2.500000e-01 mM + Insulin 10000 ng/ml + EAA 1.000000e-01 X	0.419067	0.605804	0.522244	0.478966	0.717955	0.654169	0.551182	0.612707	0.367335	0.477062	0.684884	0.686717	0.549131	0.592386	0.638809	0.618691	0.535347	0.642271	0.703852	0.441974	0.621324	0.545791	0.597402	0.459038	0.531348	0.656756	0.581453	0.604445	0.639642	0.696084	0.627147	0.61815	0.661731	0.631355	0.571358	0.574004	0.510774	0.422046	0.60896	0.548791	0.616019	0.514506	0.643445	0.5996	0.555653	0.50631	0.598967
Cell_0126	TFEB_TR	Glucose 17 mM + Glutamine 2.500000e-01 mM + Insulin 10000 ng/ml + EAA 1.000000e-01 X	1.57977	1.67508	2.45857	1.16065	1.43446	1.10016	1.91239	1.40609	1.24172	1.32184	1.09919	1.57422	2.21841	1.60201	2.02602	0.896489	1.08266	1.96748	2.01439	1.19697	2.14484	1.36991	0.942485	1.5374	1.63727	1.42637	2.87844	1.36207	1.24558	0.677071	2.5487	1.74755	1.56293	0.97702	0.965255	1.00152	1.72587	4.37557	0.727062	1.81047	1.56799	1.39167	0.937051	0.644292	1.12987	1.42677	2.89484
Cell_0126	FOXO_TR	Glucose 17 mM + Glutamine 2.500000e-01 mM + Insulin 10000 ng/ml + EAA 1.000000e-01 X	1.1227	2.31457	2.83473	1.55223	1.59858	2.05723	2.37316	2.38487	2.6923	1.06249	1.77601	2.30504	3.18924	1.94038	1.30532	1.46494	2.30846	2.93608	3.32894	1.1214	2.51773	2.25692	2.51289	1.17921	1.06104	2.28006	3.23302	2.54047	1.07262	1.93557	1.53121	2.5122	2.78317	1.23443	1.79138	1.22037	2.21586	3.32693	1.56398	2.29487	2.25735	1.95915	0.854412	2.19173	2.40743	2.39169	2.84309
Cell_0126	AMPKARt2	Glucose 17 mM + Glutamine 2.500000e-01 mM + Insulin 10000 ng/ml + EAA 1.000000e-01 X	0.407985	0.604222	0.516864	0.474581	0.718023	0.63551	0.554856	0.601992	0.349522	0.474341	0.69394	0.691718	0.554943	0.587533	0.648078	0.615731	0.527524	0.64008	0.707008	0.438369	0.627828	0.573546	0.600926	0.463445	0.525753	0.659901	0.594548	0.599395	0.632928	0.696174	0.636895	0.613803	0.652595	0.634159	0.555261	0.568639	0.540843	0.37662	0.613808	0.554698	0.618356	0.543246	0.649557	0.610651	0.548174	0.512673	0.581331
Cell_0127	TFEB_TR	Glucose 17 mM + Glutamine 2.500000e-01 mM + Insulin 10000 ng/ml + EAA 1.000000e-01 X	1.60763	1.287	2.41245	1.12415	1.42704	1.15569	1.67347	1.49581	1.44338	1.43967	0.993425	1.71413	2.1886	1.56316	1.93845	0.945561	1.15416	1.71241	1.77081	1.17622	1.55552	1.30445	0.935448	1.54304	1.60871	1.54987	2.1552	1.24125	1.19713	0.669861	2.75306	1.76044	1.58151	1.05148	0.909051	0.953691	1.83159	4.20698	0.758263	1.82778	1.78449	1.43683	0.918792	0.63019	1.19416	1.53577	3.20038
Cell_0127	FOXO_TR	Glucose 17 mM + Glutamine 2.500000e-01 mM + Insulin 10000 ng/ml + EAA 1.000000e-01 X	1.09018	1.02456	2.85234	1.50898	2.15755	1.92461	2.32789	2.41682	2.62897	1.09715	1.72373	2.28092	3.15691	1.98627	1.25639	1.4866	2.33245	2.89078	3.35423	1.11127	2.34792	2.30125	2.39647	1.19893	1.04806	2.30432	3.33251	2.40089	1.05841	1.94836	1.53744	2.54646	2.78675	1.22831	1.79299	1.17035	2.29824	3.21554	1.5183	2.32008	2.34216	2.04343	0.889385	2.14164	2.33436	2.38489	3.06407
Cell_0127	AMPKARt2	Glucose 17 mM + Glutamine 2.500000e-01 mM + Insulin 10000 ng/ml + EAA 1.000000e-01 X	0.407207	0.467398	0.523078	0.486876	0.691318	0.642563	0.54631	0.602946	0.354205	0.477529	0.702454	0.694272	0.563265	0.590708	0.65602	0.635347	0.535767	0.638279	0.722306	0.457413	0.633147	0.589656	0.59831	0.485643	0.512364	0.641787	0.598309	0.611088	0.619266	0.684155	0.649621	0.605729	0.654882	0.638868	0.565206	0.560264	0.531683	0.349472	0.611619	0.558844	0.623912	0.558906	0.659356	0.627482	0.543745	0.526259	0.578116
Cell_0128	TFEB_TR	Glucose 17 mM + Glutamine 2.500000e-01 mM + Insulin 10000 ng/ml + EAA 1.000000e-01 X	1.61633	1.28218	2.35513	1.18046	1.4211	1.21185	1.928	1.59084	1.4617	1.50601	1.07776	1.77976	1.91394	1.20281	1.83933	1.0317	1.18922	1.65191	1.89694	1.21352	2.17371	1.33094	1.0629	1.72235	1.65429	1.51195	2.54426	1.43092	1.17719	0.659661	2.47556	1.82671	1.40086	1.07835	0.831312	0.874557	1.87469	3.9961	0.775034	1.80468	2.19737	1.30833	0.894823	0.607288	1.0611	1.33016	3.72268
Cell_0128	FOXO_TR	Glucose 17 mM + Glutamine 2.500000e-01 mM + Insulin 10000 ng/ml + EAA 1.000000e-01 X	1.09419	1.02669	2.80951	1.62925	2.59406	1.81591	2.33088	2.42465	2.53694	1.09304	1.69981	2.31089	3.18174	2.0057	1.19694	1.51967	2.37657	2.87125	3.28846	1.12449	2.30027	2.37897	2.44787	1.72149	1.03185	2.28855	3.41521	2.33766	1.08749	1.91416	1.47476	2.61403	2.75046	1.24076	1.80091	1.1414	2.22532	3.10885	1.47411	2.2976	2.35513	2.04169	0.840123	2.08103	2.29563	2.35394	3.19673
Cell_0128	AMPKARt2	Glucose 17 mM + Glutamine 2.500000e-01 mM + Insulin 10000 ng/ml + EAA 1.000000e-01 X	0.447449	0.4861	0.539436	0.523078	0.685988	0.646321	0.540201	0.594191	0.347666	0.480453	0.687598	0.684568	0.56315	0.594643	0.648355	0.633925	0.541659	0.65036	0.73044	0.46628	0.624202	0.571387	0.60114	0.499411	0.513948	0.645417	0.571162	0.613711	0.619164	0.683791	0.649147	0.600501	0.661348	0.640611	0.569565	0.535543	0.533959	0.365363	0.620726	0.557577	0.617985	0.550694	0.656222	0.602761	0.538945	0.537808	0.58392
Cell_0129	TFEB_TR	Glucose 17 mM + Glutamine 2.500000e-01 mM + Insulin 10000 ng/ml + EAA 1.000000e-01 X	1.6019	1.31324	2.33623	1.28856	1.48393	1.23195	2.33401	1.83501	1.09739	1.4625	1.21021	1.63924	1.84547	1.06575	2.00335	1.09611	1.11528	1.74736	2.08022	1.31266	0.931369	1.33022	1.14692	1.94321	1.76933	1.52203	3.00231	1.66379	1.25683	0.629157	2.35555	1.69146	1.51129	1.04852	0.874387	0.901593	1.72767	3.99735	0.793596	1.76202	2.22231	1.24133	0.973364	0.596339	0.971628	1.21262	3.58391
Cell_0129	FOXO_TR	Glucose 17 mM + Glutamine 2.500000e-01 mM + Insulin 10000 ng/ml + EAA 1.000000e-01 X	1.117	1.0153	2.78311	1.78834	2.77391	1.71722	2.34692	2.37789	2.55315	1.13416	1.76329	2.36502	3.1304	2.04627	1.17899	1.57155	2.47429	2.88232	3.28766	1.1884	1.47008	2.30581	2.60562	2.49192	1.01184	2.34271	3.23207	2.58219	1.12809	1.80287	1.47767	2.64268	2.70865	1.2182	1.80734	1.13799	2.17758	3.199	1.42582	2.24988	2.32423	2.07389	0.864044	2.01709	2.42451	2.29969	3.10473
Cell_0129	AMPKARt2	Glucose 17 mM + Glutamine 2.500000e-01 mM + Insulin 10000 ng/ml + EAA 1.000000e-01 X	0.505458	0.477575	0.545845	0.539648	0.704854	0.635175	0.546823	0.571152	0.356946	0.481526	0.651817	0.690916	0.548706	0.593782	0.644415	0.623922	0.544859	0.652304	0.725884	0.457959	0.665899	0.563895	0.622389	0.485905	0.495572	0.6664	0.557184	0.618455	0.628337	0.700557	0.63846	0.610336	0.655061	0.642383	0.561079	0.530725	0.567957	0.377208	0.634751	0.556077	0.601439	0.551608	0.65192	0.533209	0.556963	0.543093	0.575461
Cell_0130	TFEB_TR	Glucose 17 mM + Glutamine 2.500000e-01 mM + Insulin 10000 ng/ml + EAA 1.000000e-01 X	1.51416	1.32222	2.32406	1.30848	1.54039	1.20983	2.11418	1.79917	1.35782	1.42713	1.23193	1.5439	1.85713	1.34742	1.98677	1.1269	1.09797	1.65653	2.04694	1.41701	0.995787	1.23197	1.32848	2.05281	1.90728	1.57193	2.88244	1.46267	1.33132	0.647128	2.7235	1.57514	1.59552	1.09115	0.918477	0.99109	1.595	4.11351	0.813553	1.72498	1.80364	1.33068	1.14669	0.58953	1.02208	1.50866	3.1754
Cell_0130	FOXO_TR	Glucose 17 mM + Glutamine 2.500000e-01 mM + Insulin 10000 ng/ml + EAA 1.000000e-01 X	1.09298	0.997685	2.89069	1.78008	2.73701	1.67278	2.3737	2.31259	2.54724	1.13831	1.8806	2.38952	3.03269	2.19746	1.16108	1.61301	2.47121	2.87249	3.2287	1.27312	1.52641	2.18275	2.56491	2.74833	1.00214	2.28961	3.09862	2.72867	1.16295	1.77525	1.53113	2.62321	2.7198	1.23103	1.81849	1.14446	2.17618	3.27592	1.37469	2.25772	2.33552	2.1016	1.32523	1.87899	2.52294	2.20852	2.93331
Cell_0130	AMPKARt2	Glucose 17 mM + Glutamine 2.500000e-01 mM + Insulin 10000 ng/ml + EAA 1.000000e-01 X	0.520216	0.476386	0.547387	0.515257	0.700935	0.633302	0.550487	0.56516	0.38735	0.474314	0.60985	0.709294	0.54597	0.596681	0.645905	0.628025	0.55412	0.642512	0.705619	0.45797	0.68335	0.583812	0.636675	0.462431	0.461177	0.66361	0.582925	0.639054	0.647094	0.703662	0.628522	0.607927	0.647502	0.649529	0.56166	0.551654	0.562848	0.365374	0.635065	0.565121	0.592436	0.563644	0.643514	0.475297	0.583797	0.545476	0.573239
Cell_0131	TFEB_TR	Glucose 17 mM + Glutamine 2.500000e-01 mM + Insulin 10000 ng/ml + EAA 1.000000e-01 X	1.4241	1.29396	2.24295	1.29482	1.5586	1.23452	1.90627	1.39913	1.7604	1.4285	1.44635	1.49243	1.78211	1.72252	1.68303	1.08256	1.1509	1.61759	2.02825	1.52997	0.913892	1.18888	1.38874	2.06366	2.03265	1.56846	2.89643	1.2241	1.28048	0.67537	2.9093	1.64562	1.53777	1.21772	0.83856	0.996657	1.72718	4.50329	0.824445	1.57267	1.62836	1.27268	1.22269	0.627007	1.04089	1.54404	3.07178
Cell_0131	FOXO_TR	Glucose 17 mM + Glutamine 2.500000e-01 mM + Insulin 10000 ng/ml + EAA 1.000000e-01 X	1.05495	0.978735	2.96922	1.68267	2.56098	1.68339	2.35742	2.24384	2.46435	1.06101	1.91881	2.31428	2.94886	2.2831	1.10589	1.59624	2.32921	2.83042	3.11267	1.31094	1.51092	2.11672	2.43709	2.58634	0.99315	2.10899	3.20395	2.66827	1.18532	1.7514	1.54395	2.62588	2.88093	1.33107	1.81743	1.14169	2.19783	3.2954	1.34288	1.54169	2.42548	2.05623	1.89731	1.79951	2.57547	2.25051	2.83589
Cell_0131	AMPKARt2	Glucose 17 mM + Glutamine 2.500000e-01 mM + Insulin 10000 ng/ml + EAA 1.000000e-01 X	0.5034	0.48733	0.544224	0.510876	0.682707	0.639188	0.539378	0.577489	0.37904	0.469246	0.575346	0.705338	0.563021	0.602507	0.640093	0.626984	0.545326	0.6355	0.683251	0.462715	0.688585	0.602504	0.644622	0.45904	0.45017	0.644311	0.604847	0.658926	0.659128	0.684045	0.626467	0.584206	0.654732	0.655783	0.56928	0.56389	0.521632	0.363857	0.63008	0.628693	0.606808	0.567011	0.637731	0.468018	0.588303	0.547202	0.588418
Cell_0132	TFEB_TR	Glucose 17 mM + Glutamine 2.500000e-01 mM + Insulin 10000 ng/ml + EAA 1.000000e-01 X	1.39058	1.28382	2.19397	1.30612	1.57847	1.27653	1.95146	1.13517	1.33677	1.46014	1.74303	1.42796	1.94333	1.61627	1.63246	1.01895	1.11342	1.73771	2.16048	1.62048	0.880094	1.23641	1.25599	2.10902	2.13946	1.54973	2.97278	1.30887	1.1943	0.627722	2.54952	1.73739	1.8178	1.1291	0.805516	0.960575	1.80843	4.28826	0.833513	1.50166	2.04802	1.22706	1.17496	0.719877	1.04247	1.45876	3.07356
Cell_0132	FOXO_TR	Glucose 17 mM + Glutamine 2.500000e-01 mM + Insulin 10000 ng/ml + EAA 1.000000e-01 X	1.03525	0.969128	2.91448	1.62754	2.44969	1.64811	2.25585	2.16824	2.41537	1.40154	1.89997	2.26903	2.84228	2.24382	1.07887	1.52365	2.32868	2.78544	3.19336	1.30706	1.5387	2.06533	2.48048	2.59559	0.974291	2.12248	3.27712	2.79584	1.13721	1.56525	1.48465	2.63474	3.12614	1.27131	1.83116	1.13924	2.36107	3.37588	1.32126	1.67262	2.49359	2.12888	2.06499	1.79592	2.77914	2.31818	2.82918
Cell_0132	AMPKARt2	Glucose 17 mM + Glutamine 2.500000e-01 mM + Insulin 10000 ng/ml + EAA 1.000000e-01 X	0.501704	0.482073	0.541517	0.547501	0.680806	0.640174	0.545074	0.577612	0.358955	0.480986	0.572544	0.691933	0.577633	0.596392	0.639666	0.621795	0.526041	0.631061	0.689411	0.455682	0.684221	0.601766	0.664423	0.4741	0.45491	0.639601	0.600161	0.673737	0.655502	0.657184	0.640421	0.582995	0.663976	0.658569	0.574027	0.565109	0.518454	0.373344	0.635194	0.609118	0.625594	0.564482	0.648065	0.480534	0.579432	0.549288	0.584229
Cell_0133	TFEB_TR	Glucose 17 mM + Glutamine 2.500000e-01 mM + Insulin 10000 ng/ml + EAA 1.000000e-01 X	1.36749	1.2773	2.21736	1.27943	1.53781	1.28197	0.790675	1.09427	1.18279	1.53516	1.7301	1.52298	2.0849	1.21811	1.79429	1.05272	1.02073	1.70779	2.42483	1.65337	0.931026	1.31165	1.37485	2.23527	2.21187	1.52089	2.79221	1.46021	1.24869	0.653771	2.4054	1.75252	1.99624	0.9119	0.873598	0.996369	1.6556	3.65148	0.836723	1.28151	2.22053	1.4706	1.24993	0.774124	1.07189	1.68827	3.159
Cell_0133	FOXO_TR	Glucose 17 mM + Glutamine 2.500000e-01 mM + Insulin 10000 ng/ml + EAA 1.000000e-01 X	1.03153	0.977597	2.87651	1.61158	2.49487	1.55418	2.09271	2.08666	2.36274	2.33641	1.92223	2.3304	2.77592	2.24094	1.06629	1.49872	2.42726	2.74402	3.3182	1.31358	1.58913	2.07458	2.53666	2.78081	0.964523	2.24051	3.2879	2.92311	1.13439	1.44068	1.45633	2.59028	3.18675	1.10346	1.83663	1.179	2.43778	3.59702	1.29251	1.6972	2.49194	2.25552	2.03008	1.70048	2.94057	2.1592	2.81638
Cell_0133	AMPKARt2	Glucose 17 mM + Glutamine 2.500000e-01 mM + Insulin 10000 ng/ml + EAA 1.000000e-01 X	0.511807	0.479429	0.555475	0.562175	0.683333	0.640804	0.540078	0.57267	0.380165	0.480602	0.588848	0.692847	0.578128	0.585902	0.653813	0.629048	0.537233	0.624528	0.708621	0.449993	0.682885	0.584749	0.679073	0.478988	0.448927	0.650628	0.594723	0.679262	0.664371	0.63187	0.657472	0.604454	0.656645	0.664869	0.57217	0.571634	0.533059	0.368204	0.643836	0.613008	0.613746	0.561753	0.647949	0.490884	0.574907	0.554215	0.557519
Cell_0134	TFEB_TR	Glucose 17 mM + Glutamine 2.500000e-01 mM + Insulin 10000 ng/ml + EAA 1.000000e-01 X	1.33776	1.26179	2.15805	1.23229	1.4954	1.27919	0.77173	1.11122	1.62598	1.62382	1.73788	1.58773	1.80406	1.24377	1.74656	1.15916	1.04151	1.60664	2.60372	1.72726	0.926086	1.37211	1.54223	2.34141	2.17779	1.5063	2.59345	1.45471	1.47103	0.788487	2.69986	1.73725	1.70565	1.02481	0.850606	1.03972	1.5627	3.74441	0.837735	1.33501	1.75875	1.57325	1.43687	0.795802	1.01118	1.85989	3.34142
Cell_0134	FOXO_TR	Glucose 17 mM + Glutamine 2.500000e-01 mM + Insulin 10000 ng/ml + EAA 1.000000e-01 X	1.04713	0.981022	2.90886	1.60203	2.47542	1.50487	2.05354	2.08594	2.24778	3.07603	1.9039	2.30925	2.83377	2.25642	1.01764	1.53685	2.35261	2.74057	3.21645	1.34926	1.57762	2.14727	2.43654	2.87647	0.951264	2.19716	3.3412	2.62368	1.55468	1.50768	1.51267	2.55966	3.07555	1.243	1.76558	1.24341	2.21512	3.81679	1.28052	1.69093	2.53948	2.10099	2.0558	1.59611	2.86209	2.04137	2.80986
Cell_0134	AMPKARt2	Glucose 17 mM + Glutamine 2.500000e-01 mM + Insulin 10000 ng/ml + EAA 1.000000e-01 X	0.524154	0.492791	0.566044	0.539252	0.676301	0.642465	0.543401	0.5721	0.386654	0.444017	0.58048	0.698289	0.571774	0.586268	0.664782	0.622779	0.557269	0.618619	0.702994	0.454274	0.68831	0.57027	0.678268	0.46526	0.439257	0.662268	0.597146	0.662244	0.653244	0.61212	0.658779	0.614834	0.641746	0.66825	0.570961	0.584136	0.509652	0.365886	0.640227	0.631623	0.588556	0.567309	0.622967	0.521056	0.578161	0.562003	0.559523
Cell_0135	TFEB_TR	Glucose 17 mM + Glutamine 2.500000e-01 mM + Insulin 10000 ng/ml + EAA 1.000000e-01 X	1.31127	1.30225	2.04549	1.21357	1.5147	1.25202	0.777439	1.1973	1.50248	1.7454	1.90146	1.28258	1.57544	1.45039	1.65106	1.2166	1.12395	1.66989	2.45262	1.85996	0.919169	1.32431	1.36704	2.38412	2.08821	0.892769	2.57232	1.31699	1.64283	0.801644	2.69079	1.73735	1.61188	1.23216	0.759724	1.01267	1.56438	3.66419	0.869245	1.56062	1.64793	1.42727	1.43431	0.875457	0.960214	1.87095	3.26697
Cell_0135	FOXO_TR	Glucose 17 mM + Glutamine 2.500000e-01 mM + Insulin 10000 ng/ml + EAA 1.000000e-01 X	1.04522	0.968294	2.90777	1.55848	2.28611	1.49385	2.10303	2.24438	2.17318	3.12901	1.76622	2.22403	2.92974	2.18145	1.01784	1.50572	2.26358	2.79173	3.09659	1.39201	1.60866	2.15596	2.39622	2.8683	0.926334	1.91744	3.33525	2.26133	2.29497	1.55477	1.53181	2.55195	3.09583	1.46439	1.69285	1.27391	2.07241	3.79149	1.29336	1.68818	2.61181	1.84662	2.03517	1.6128	2.85796	2.22651	2.888
Cell_0135	AMPKARt2	Glucose 17 mM + Glutamine 2.500000e-01 mM + Insulin 10000 ng/ml + EAA 1.000000e-01 X	0.536298	0.491314	0.555432	0.520178	0.669284	0.645489	0.538056	0.554509	0.358167	0.402458	0.556451	0.703974	0.56722	0.586422	0.660721	0.583795	0.549046	0.620899	0.684702	0.454923	0.694453	0.576366	0.677751	0.455982	0.433672	0.681473	0.604321	0.646866	0.574517	0.59942	0.657822	0.619558	0.64282	0.668273	0.577926	0.586225	0.487894	0.379837	0.628773	0.634901	0.588101	0.593799	0.605707	0.553242	0.587823	0.567507	0.591255
Cell_0136	TFEB_TR	Glucose 17 mM + Glutamine 2.500000e-01 mM + Insulin 10000 ng/ml + EAA 1.000000e-01 X	1.29999	1.35817	2.06743	1.18577	1.43176	1.20269	0.784304	1.16411	1.24981	1.85529	1.84191	0.955695	1.69935	1.36062	1.61211	1.12755	1.10522	1.75203	2.25544	1.91681	0.980684	1.29432	1.23952	2.4368	2.09473	0.813807	2.86945	1.13741	1.61624	0.786984	2.53714	1.73206	1.86945	1.12251	0.763371	0.990961	1.49594	3.00598	0.900899	1.45539	2.14663	1.55689	1.30781	0.950268	1.06	1.74309	2.978
Cell_0136	FOXO_TR	Glucose 17 mM + Glutamine 2.500000e-01 mM + Insulin 10000 ng/ml + EAA 1.000000e-01 X	1.03747	0.960713	2.88087	1.50116	2.18468	1.45104	2.11547	2.40143	2.13809	2.96528	1.65125	2.25667	2.99001	2.10722	1.04391	1.41032	2.33348	2.80669	3.1317	1.40058	1.68724	2.14523	2.49201	2.90006	0.924461	1.8793	3.25168	2.34783	2.66912	1.53191	1.51619	2.45815	3.24363	1.3597	1.71865	1.25581	2.17017	3.56772	1.27457	1.62557	2.57192	1.88376	1.98086	1.64028	3.06258	2.40729	2.94217
Cell_0136	AMPKARt2	Glucose 17 mM + Glutamine 2.500000e-01 mM + Insulin 10000 ng/ml + EAA 1.000000e-01 X	0.536019	0.483646	0.544803	0.515695	0.6673	0.65227	0.540055	0.542357	0.357621	0.390273	0.547522	0.709072	0.564441	0.582232	0.656841	0.553948	0.542522	0.628438	0.677671	0.453606	0.690224	0.593607	0.679454	0.462654	0.424845	0.691562	0.622081	0.666837	0.511216	0.596103	0.662978	0.621675	0.656375	0.673176	0.580534	0.570065	0.492168	0.379437	0.634535	0.628436	0.60064	0.620114	0.61122	0.557497	0.592034	0.56273	0.600811
Cell_0137	TFEB_TR	Glucose 17 mM + Glutamine 2.500000e-01 mM + Insulin 10000 ng/ml + EAA 1.000000e-01 X	1.31341	1.33494	2.16856	1.1439	1.34588	1.22071	0.782287	1.04271	1.48977	1.79517	1.73216	1.02403	1.82143	1.11728	1.45977	0.98704	1.07714	1.70996	2.26704	1.91788	1.02471	1.42963	1.23417	2.54288	2.12764	0.840966	3.04157	1.09206	1.53634	0.95291	2.79614	1.64848	1.90007	1.049	0.810226	0.990614	1.45213	3.26625	0.876052	1.27756	2.30033	1.75959	1.28434	0.940463	1.03316	1.38065	2.90679
Cell_0137	FOXO_TR	Glucose 17 mM + Glutamine 2.500000e-01 mM + Insulin 10000 ng/ml + EAA 1.000000e-01 X	1.0602	0.96273	2.89209	1.49633	2.26823	1.42417	2.04756	2.38361	2.02406	2.94474	1.67069	2.29749	3.07556	2.12792	1.00394	1.38351	2.36594	2.77388	3.12322	1.38388	1.67985	2.20699	2.52798	3.05882	0.940889	1.85306	3.17582	2.59482	2.5476	1.52923	1.59009	2.35541	3.28027	1.27906	1.7832	1.20944	2.17039	3.42184	1.21684	1.56266	2.52915	2.01617	1.96935	1.6385	2.00235	2.39389	2.90771
Cell_0137	AMPKARt2	Glucose 17 mM + Glutamine 2.500000e-01 mM + Insulin 10000 ng/ml + EAA 1.000000e-01 X	0.538895	0.49757	0.542998	0.517344	0.660781	0.656034	0.542295	0.56521	0.379306	0.410562	0.542452	0.70386	0.556771	0.5863	0.672466	0.556907	0.555167	0.629026	0.678367	0.458522	0.670488	0.595266	0.668605	0.46625	0.422422	0.677177	0.627111	0.695726	0.520421	0.602639	0.658786	0.613263	0.659032	0.664958	0.573874	0.558945	0.467915	0.363152	0.653416	0.635562	0.601853	0.614537	0.618893	0.564453	0.757205	0.553837	0.591963
Cell_0138	TFEB_TR	Glucose 17 mM + Glutamine 2.500000e-01 mM + Insulin 10000 ng/ml + EAA 1.000000e-01 X	1.29921	1.30434	2.21381	1.12224	1.53516	1.33792	0.784546	1.21633	1.35093	1.65734	1.80539	1.20422	1.87196	0.871052	1.43301	1.08579	1.16249	1.63721	2.32355	1.96891	0.96708	1.55722	1.05154	2.68171	2.08783	0.933594	2.6035	1.31383	1.49327	1.0494	2.90055	1.52995	1.71578	1.19336	0.801776	0.942736	1.51177	3.99941	0.84169	1.37565	1.93397	1.55859	1.243	0.893853	0.73267	1.30659	3.08814
Cell_0138	FOXO_TR	Glucose 17 mM + Glutamine 2.500000e-01 mM + Insulin 10000 ng/ml + EAA 1.000000e-01 X	1.05253	0.968288	2.91753	1.5089	2.34169	1.44969	2.01785	2.28818	1.92135	2.91801	1.72198	2.24537	3.14592	2.12279	1.15368	1.42366	2.30135	2.83838	3.01401	1.38579	1.65025	2.2349	2.48442	3.17404	0.941741	1.81555	3.15214	2.52112	2.40902	1.53743	1.66786	2.35134	3.21828	1.39494	1.79687	1.19431	2.06836	3.45266	1.19531	1.60084	2.61196	1.94681	1.95927	1.65484	1.99091	2.33376	2.92721
Cell_0138	AMPKARt2	Glucose 17 mM + Glutamine 2.500000e-01 mM + Insulin 10000 ng/ml + EAA 1.000000e-01 X	0.557154	0.497825	0.541882	0.520643	0.653352	0.66015	0.529447	0.578032	0.389222	0.442927	0.537326	0.697771	0.548014	0.597569	0.694804	0.558196	0.555078	0.622575	0.684	0.458942	0.662987	0.581167	0.643707	0.454711	0.429859	0.667612	0.604965	0.690953	0.521776	0.604152	0.650791	0.610335	0.655419	0.650131	0.559336	0.558781	0.418082	0.355975	0.652853	0.645988	0.597108	0.594599	0.611452	0.580007	0.746291	0.558424	0.596775
Cell_0139	TFEB_TR	Glucose 17 mM + Glutamine 2.500000e-01 mM + Insulin 10000 ng/ml + EAA 1.000000e-01 X	1.26488	1.31668	2.18699	1.10873	1.72522	1.43995	0.787942	1.49706	1.00484	1.68429	1.98148	1.18008	1.92135	0.941379	1.63404	1.37324	1.19015	1.71426	2.49265	2.01128	0.899222	1.60528	1.10315	2.78118	2.1572	0.956059	2.37976	1.56622	1.46858	0.963685	2.60424	1.42253	1.70031	1.25178	0.759908	0.919845	1.64043	3.78279	0.840785	1.4354	1.89029	1.41882	1.20621	0.846858	0.957672	1.52491	3.20612
Cell_0139	FOXO_TR	Glucose 17 mM + Glutamine 2.500000e-01 mM + Insulin 10000 ng/ml + EAA 1.000000e-01 X	1.03696	0.972234	2.90805	1.48859	2.41108	1.45731	2.00689	2.23183	1.99945	2.8757	1.71897	1.46717	3.08825	2.03609	1.71645	1.46463	2.28236	2.97966	2.94036	1.38062	1.69816	2.23604	2.45424	3.08482	0.934096	1.77424	3.17112	2.31998	2.37291	1.54533	1.67041	2.31177	3.16198	1.49009	1.73206	1.27004	2.04493	3.48443	1.20438	1.67375	2.69589	1.84004	1.95418	1.64369	1.99293	2.26065	2.94077
Cell_0139	AMPKARt2	Glucose 17 mM + Glutamine 2.500000e-01 mM + Insulin 10000 ng/ml + EAA 1.000000e-01 X	0.561096	0.469196	0.541438	0.519526	0.662817	0.675135	0.520875	0.562856	0.399855	0.458359	0.548621	0.618193	0.55261	0.612682	0.69753	0.553128	0.542495	0.618023	0.689406	0.452851	0.685487	0.581602	0.6309	0.442246	0.427252	0.673044	0.59964	0.673072	0.504272	0.594944	0.649741	0.614014	0.662624	0.666842	0.52968	0.549796	0.406581	0.352114	0.640591	0.648465	0.599966	0.589123	0.592803	0.567355	0.733154	0.571589	0.603038
Cell_0140	TFEB_TR	Glucose 17 mM + Glutamine 2.500000e-01 mM + Insulin 10000 ng/ml + EAA 1.000000e-01 X	1.29509	1.27921	2.05792	1.08844	1.5824	1.38748	0.796596	1.49564	1.26405	1.81138	2.21476	1.18455	1.83132	1.28206	1.79907	1.42871	1.08834	1.9591	2.69007	1.99467	0.983088	1.56506	1.49323	2.83573	2.39314	0.893421	2.94121	1.47973	1.50866	0.967884	2.69737	1.33124	1.74602	1.26821	0.731621	0.989312	1.82101	3.33119	0.822305	1.30665	2.43866	1.66905	1.35316	0.825624	1.21817	1.47968	3.21292
Cell_0140	FOXO_TR	Glucose 17 mM + Glutamine 2.500000e-01 mM + Insulin 10000 ng/ml + EAA 1.000000e-01 X	1.04983	0.957397	2.83657	1.46214	2.50608	1.42313	1.9316	2.16074	2.14217	2.9568	1.67517	1.52964	3.01435	2.05813	2.35256	1.48745	2.33866	2.98324	2.88642	1.37883	1.74029	2.35062	2.4563	3.02015	0.942933	1.73761	3.12291	2.37774	2.31766	1.51801	1.72903	2.2011	3.1095	1.93268	1.60643	1.37288	2.00646	3.37114	1.16642	1.67808	2.69377	1.88035	1.95333	1.62495	1.97526	2.24396	2.76259
Cell_0140	AMPKARt2	Glucose 17 mM + Glutamine 2.500000e-01 mM + Insulin 10000 ng/ml + EAA 1.000000e-01 X	0.548933	0.461451	0.541864	0.522731	0.678099	0.686213	0.533324	0.563399	0.405553	0.456342	0.555773	0.602077	0.567361	0.626486	0.69123	0.561919	0.541146	0.617873	0.690422	0.453997	0.692548	0.598997	0.640464	0.441786	0.425543	0.670108	0.616965	0.678011	0.521588	0.59646	0.645322	0.60287	0.670069	0.688031	0.505993	0.543682	0.438928	0.351333	0.640411	0.646436	0.614541	0.586486	0.584719	0.558535	0.723373	0.579499	0.607603
Cell_0141	TFEB_TR	Glucose 17 mM + Glutamine 2.500000e-01 mM + Insulin 10000 ng/ml + EAA 1.000000e-01 X	1.3351	1.22647	1.88746	1.06827	1.40485	1.22234	0.814354	1.29163	1.36977	1.87021	2.26584	1.20722	1.69939	1.40455	1.9782	1.30027	1.10717	2.00604	2.47408	1.96497	1.08878	1.39021	1.47759	2.96829	2.52975	0.849076	3.20995	1.20934	1.54604	1.01987	3.48834	1.46692	1.83266	1.30534	0.779424	1.03941	1.84113	3.37715	0.78166	1.21828	2.61589	1.75707	1.45172	0.845097	1.04657	1.53717	3.32795
Cell_0141	FOXO_TR	Glucose 17 mM + Glutamine 2.500000e-01 mM + Insulin 10000 ng/ml + EAA 1.000000e-01 X	1.0083	0.936219	2.76992	1.44484	2.42242	1.39735	1.86618	2.03772	2.16221	3.0725	1.56247	1.58614	3.03629	2.16148	2.72298	1.47729	2.4242	2.85824	2.79753	1.4019	1.7396	2.46803	2.46085	3.14524	0.956262	1.68432	3.03683	2.54083	2.30477	1.42497	2.79882	2.18082	3.09946	2.78658	1.49967	1.38636	1.93816	3.25831	1.09547	1.62522	2.69247	1.9648	1.94624	1.64457	1.81786	2.37654	2.57823
Cell_0141	AMPKARt2	Glucose 17 mM + Glutamine 2.500000e-01 mM + Insulin 10000 ng/ml + EAA 1.000000e-01 X	0.556404	0.470873	0.54466	0.534187	0.679488	0.678964	0.547715	0.567116	0.399948	0.452529	0.532936	0.608371	0.571906	0.627917	0.692371	0.558852	0.542015	0.620503	0.697559	0.458319	0.666915	0.602008	0.640447	0.448393	0.440858	0.667187	0.612018	0.688677	0.536476	0.619461	0.720458	0.581443	0.667833	0.677347	0.503086	0.547948	0.47026	0.363979	0.640496	0.637457	0.628018	0.585905	0.598518	0.59201	0.716697	0.588137	0.621832
Cell_0142	TFEB_TR	Glucose 17 mM + Glutamine 2.500000e-01 mM + Insulin 10000 ng/ml + EAA 1.000000e-01 X	1.33676	1.26435	1.8905	1.06352	1.42365	1.09616	0.813884	1.07653	1.04834	1.86531	2.32423	1.22711	1.70915	1.53337	2.18034	1.36325	1.29343	1.71938	2.09593	1.94186	1.01111	1.40017	1.20404	3.10431	2.50501	0.868214	2.60182	1.19629	1.52021	0.960915	2.65677	1.78116	2.21641	1.23344	0.914616	1.03695	1.59322	3.33718	0.769679	1.23758	1.90726	1.57484	1.36602	0.849921	0.836207	1.76948	3.43379
Cell_0142	FOXO_TR	Glucose 17 mM + Glutamine 2.500000e-01 mM + Insulin 10000 ng/ml + EAA 1.000000e-01 X	1.15635	0.930937	2.82056	1.4487	2.24347	1.39775	1.84534	1.97803	2.12882	3.11326	1.43326	1.64136	3.04742	2.09567	2.94203	1.45865	2.46611	2.84986	2.7588	1.33412	1.75263	2.40766	2.42584	3.20607	0.935086	1.64216	3.09659	2.50092	2.32911	1.35148	2.83036	2.23404	3.09808	3.23859	1.44821	1.32932	1.92153	3.3035	1.06843	1.55493	2.75966	1.96149	1.97277	1.65983	1.59747	2.48494	2.5972
Cell_0142	AMPKARt2	Glucose 17 mM + Glutamine 2.500000e-01 mM + Insulin 10000 ng/ml + EAA 1.000000e-01 X	0.566669	0.455818	0.550539	0.53709	0.680786	0.673357	0.541912	0.547792	0.397026	0.44684	0.519173	0.618934	0.562862	0.62938	0.682752	0.53871	0.536934	0.625923	0.704117	0.4542	0.657106	0.592598	0.623313	0.451453	0.439315	0.670726	0.607653	0.682788	0.524958	0.646901	0.703731	0.578222	0.668258	0.671648	0.489604	0.542542	0.478212	0.374819	0.640165	0.632407	0.624754	0.604687	0.616059	0.611806	0.713657	0.593112	0.628043
Cell_0143	TFEB_TR	Glucose 17 mM + Glutamine 2.500000e-01 mM + Insulin 10000 ng/ml + EAA 1.000000e-01 X	1.42951	1.31267	2.12205	1.09501	1.42732	1.06831	0.794658	1.25289	1.27279	1.81224	2.65195	1.21156	1.80808	1.54887	2.21281	1.4539	1.34784	1.60065	2.08871	2.01786	0.990853	1.61634	1.42815	3.04443	2.51434	0.917816	2.28343	1.34437	1.52468	0.934878	3.36286	1.80678	2.42793	1.22514	1.03313	1.06327	1.40675	3.05647	0.778449	1.31362	1.54874	1.62903	1.35056	0.842195	0.870063	1.56795	3.20176
Cell_0143	FOXO_TR	Glucose 17 mM + Glutamine 2.500000e-01 mM + Insulin 10000 ng/ml + EAA 1.000000e-01 X	1.77897	0.912595	2.90673	1.48581	2.24922	1.41269	1.77918	2.06401	2.11422	3.13676	1.42814	1.64365	3.085	2.03746	3.06675	1.45766	2.44084	3.01202	2.83883	1.36474	1.74409	2.26404	2.42334	3.07677	0.910895	1.65617	3.20317	2.33681	2.34085	1.35045	2.75652	2.22375	2.98508	3.16958	1.40669	1.305	1.93253	3.35783	1.08557	1.51295	2.836	1.91219	2.00167	1.6615	1.55677	2.49605	2.62978
Cell_0143	AMPKARt2	Glucose 17 mM + Glutamine 2.500000e-01 mM + Insulin 10000 ng/ml + EAA 1.000000e-01 X	0.526431	0.438078	0.553269	0.52739	0.683235	0.684787	0.532773	0.540831	0.383963	0.445296	0.55488	0.618116	0.554564	0.638438	0.66327	0.544544	0.54081	0.629037	0.70346	0.456019	0.658407	0.596947	0.617221	0.447811	0.417992	0.660911	0.630704	0.673631	0.518426	0.65863	0.714192	0.596329	0.674273	0.68078	0.465812	0.539159	0.474883	0.380057	0.647587	0.640905	0.614544	0.616867	0.620131	0.591365	0.723698	0.584428	0.626546
Cell_0144	TFEB_TR	Glucose 17 mM + Glutamine 2.500000e-01 mM + Insulin 10000 ng/ml + EAA 1.000000e-01 X	1.61897	1.30213	2.27413	1.12964	1.3978	1.13712	0.797543	1.85419	1.59627	1.75404	2.47007	1.1977	1.92754	1.28238	2.17193	1.35629	1.20254	1.80192	2.22743	2.33164	1.25705	1.56601	1.68116	2.94235	2.53772	0.958483	2.86185	1.23795	1.55458	0.969811	3.85735	1.53013	2.21772	1.32325	1.11076	1.0647	1.3633	2.84019	0.775411	1.36256	2.09667	1.85791	1.41728	0.84458	0.906052	1.31664	2.78684
Cell_0144	FOXO_TR	Glucose 17 mM + Glutamine 2.500000e-01 mM + Insulin 10000 ng/ml + EAA 1.000000e-01 X	2.42497	0.873389	2.8997	1.51066	2.35884	1.44831	1.69704	2.12116	2.05313	3.14214	1.45887	1.59792	3.22606	2.22017	2.97889	1.46962	2.41914	3.15522	2.90501	1.93543	1.67091	2.18807	2.48209	2.97201	0.929446	1.7083	3.14668	2.26312	2.41585	1.36791	2.65577	2.1661	2.84235	3.13566	1.38985	1.32134	2.00717	3.31217	1.07024	1.56607	2.84846	1.90976	2.01295	1.62229	1.64143	2.54513	2.55747
Cell_0144	AMPKARt2	Glucose 17 mM + Glutamine 2.500000e-01 mM + Insulin 10000 ng/ml + EAA 1.000000e-01 X	0.44839	0.44009	0.549993	0.515752	0.670274	0.694035	0.550309	0.557452	0.36549	0.45187	0.590903	0.61521	0.551767	0.634863	0.660115	0.562113	0.549753	0.61942	0.707591	0.47712	0.638983	0.609759	0.62504	0.444491	0.420755	0.656593	0.636763	0.670884	0.509607	0.654178	0.728089	0.601426	0.674707	0.673977	0.463978	0.548371	0.475611	0.391681	0.64899	0.642025	0.617006	0.600312	0.615958	0.590062	0.739303	0.582285	0.633883
Cell_0145	TFEB_TR	Glucose 17 mM + Glutamine 2.500000e-01 mM + Insulin 10000 ng/ml + EAA 1.000000e-01 X	1.78635	1.32701	2.12917	1.10967	1.48689	1.18758	0.820042	2.00515	1.20095	1.76314	1.85517	1.23076	2.00913	1.70152	2.13007	1.37891	0.830496	1.88998	2.21048	2.77833	1.50969	1.426	1.42377	2.98588	2.49597	1.01366	3.31852	1.0451	1.58316	0.973115	2.62581	1.2826	2.67841	1.30489	1.24958	1.01949	1.27177	2.80669	0.75706	1.35054	2.31706	1.83276	1.41936	0.806335	0.858014	1.49326	2.61757
Cell_0145	FOXO_TR	Glucose 17 mM + Glutamine 2.500000e-01 mM + Insulin 10000 ng/ml + EAA 1.000000e-01 X	2.64126	0.85939	2.89531	1.48838	2.44761	1.47474	1.6961	2.03219	1.99155	3.07929	1.36383	1.59735	3.27735	2.35602	2.84293	1.54049	2.07135	3.16698	2.80507	2.72508	1.60221	2.13606	2.48722	2.97487	0.915119	1.76728	3.04009	2.26986	2.51744	1.36638	2.66486	2.13585	2.83649	3.11308	1.42162	1.30927	2.08397	3.33375	1.06424	1.6784	2.87076	1.9146	2.05731	1.5521	1.6236	2.55213	2.52785
Cell_0145	AMPKARt2	Glucose 17 mM + Glutamine 2.500000e-01 mM + Insulin 10000 ng/ml + EAA 1.000000e-01 X	0.396845	0.436757	0.546671	0.509215	0.662658	0.688877	0.571743	0.575555	0.374242	0.454675	0.575162	0.621261	0.551917	0.629179	0.663403	0.545065	0.761034	0.607711	0.695622	0.49587	0.630442	0.616097	0.634869	0.446612	0.435322	0.663857	0.624753	0.664466	0.505726	0.659401	0.726893	0.585373	0.671103	0.665147	0.471126	0.546805	0.484026	0.400288	0.65333	0.62817	0.630383	0.582311	0.616272	0.613794	0.741051	0.593523	0.635817
Cell_0146	TFEB_TR	Glucose 17 mM + Glutamine 2.500000e-01 mM + Insulin 10000 ng/ml + EAA 1.000000e-01 X	1.9429	1.3959	2.03694	1.07708	1.58596	1.08863	0.823214	1.65444	0.985761	1.79803	2.05589	1.24487	2.03676	2.25038	2.09355	1.58078	0.986934	1.83381	2.16117	2.99605	1.53159	1.52395	1.24879	3.0112	2.52944	1.09729	3.12636	1.30503	1.63426	0.980645	1.89121	1.1807	3.71463	1.26642	1.43434	1.05134	1.42369	3.02906	0.742126	1.43339	2.0943	1.5766	1.36226	0.77331	0.767094	1.62428	2.74362
Cell_0146	FOXO_TR	Glucose 17 mM + Glutamine 2.500000e-01 mM + Insulin 10000 ng/ml + EAA 1.000000e-01 X	2.65894	0.869061	2.95342	1.45166	2.51666	1.43084	1.72624	1.99798	1.99638	3.01737	1.25298	1.63706	3.2613	2.28451	2.89728	1.67263	1.94781	3.10478	2.69312	3.01001	1.57583	2.03006	2.47436	2.97011	0.86958	1.81574	3.04652	2.263	2.4992	1.35233	2.72471	2.13434	2.92026	2.99764	1.43123	1.28051	2.00744	3.42499	1.26419	1.73332	2.90696	1.87993	2.06656	1.58462	1.54472	2.45103	2.53711
Cell_0146	AMPKARt2	Glucose 17 mM + Glutamine 2.500000e-01 mM + Insulin 10000 ng/ml + EAA 1.000000e-01 X	0.387396	0.42078	0.544692	0.505696	0.674384	0.690625	0.554134	0.588081	0.38598	0.455192	0.548094	0.631962	0.55553	0.643583	0.659773	0.519626	0.770496	0.615902	0.667426	0.493068	0.638877	0.61389	0.635585	0.448266	0.431491	0.628662	0.62807	0.647814	0.525907	0.685827	0.725747	0.583911	0.669914	0.668781	0.473304	0.545902	0.49477	0.398361	0.667837	0.624048	0.63419	0.581532	0.6277	0.615498	0.737581	0.595537	0.629232
Cell_0147	TFEB_TR	Glucose 17 mM + Glutamine 2.500000e-01 mM + Insulin 10000 ng/ml + EAA 1.000000e-01 X	2.05311	1.41989	2.23587	1.10373	1.60535	1.06014	0.803999	1.58322	1.34538	1.82702	2.49943	1.21241	2.08125	1.74762	2.15319	1.6456	1.04866	1.80656	2.19227	2.79926	1.57243	1.56329	1.28566	2.91606	2.63633	1.09532	2.7603	1.83986	1.64517	0.954591	3.3712	1.32051	3.4364	1.28646	1.51231	1.25369	1.92806	3.32202	0.753804	1.61173	2.24499	1.42698	1.27276	0.808725	0.689838	1.45481	2.81909
Cell_0147	FOXO_TR	Glucose 17 mM + Glutamine 2.500000e-01 mM + Insulin 10000 ng/ml + EAA 1.000000e-01 X	2.63111	0.862952	2.96882	1.45361	2.49653	1.46297	1.70569	2.05026	2.00399	3.01509	1.2426	1.65727	3.39348	2.23778	2.98913	1.75389	1.8148	3.06485	2.75304	2.8881	1.54528	1.90647	2.46968	2.94043	0.894825	1.82638	3.1069	2.32636	2.40682	1.34332	2.68909	2.14773	2.95535	2.94528	1.39554	2.67234	1.91657	3.31463	1.66703	1.71717	2.81216	1.86781	2.01944	1.62975	1.54713	2.4269	2.46783
Cell_0147	AMPKARt2	Glucose 17 mM + Glutamine 2.500000e-01 mM + Insulin 10000 ng/ml + EAA 1.000000e-01 X	0.383563	0.408236	0.533467	0.498333	0.675373	0.710648	0.513875	0.574776	0.360863	0.451538	0.552011	0.627214	0.558691	0.651932	0.666559	0.530485	0.767054	0.626125	0.679894	0.478553	0.628817	0.601912	0.61685	0.447767	0.424869	0.569592	0.627454	0.631323	0.535432	0.701808	0.727434	0.600376	0.664722	0.665762	0.488503	0.733414	0.486801	0.391701	0.66689	0.632292	0.62135	0.601678	0.640385	0.605071	0.74285	0.594227	0.629114
Cell_0148	TFEB_TR	Glucose 17 mM + Glutamine 2.500000e-01 mM + Insulin 10000 ng/ml + EAA 1.000000e-01 X	2.06368	1.42644	2.30365	1.15082	1.66978	1.25677	0.781981	1.55608	1.43434	1.8521	1.96071	1.23235	2.03808	1.43002	2.17962	1.58801	1.03531	1.69391	2.43928	2.49495	1.7577	1.55914	1.1494	2.80562	2.6983	1.04898	2.5349	1.95501	1.64833	0.865929	4.31757	1.52646	2.28802	1.24226	1.45455	0.987143	2.17228	3.44988	0.768194	1.72462	2.36894	1.55549	1.26221	0.828785	0.811281	1.352	2.62647
Cell_0148	FOXO_TR	Glucose 17 mM + Glutamine 2.500000e-01 mM + Insulin 10000 ng/ml + EAA 1.000000e-01 X	2.52704	0.849384	2.95464	1.5195	2.51849	1.86511	1.66164	1.99968	1.99415	3.03547	1.24847	1.69273	3.44079	2.33666	2.91627	1.72246	1.75592	3.09692	2.8128	2.78295	1.52973	1.80876	2.36305	2.93804	0.89126	1.78688	3.13657	2.50099	2.3876	1.34534	2.57905	2.16358	2.93156	2.89533	1.36727	2.70585	1.93495	3.02683	1.99708	1.68393	2.72421	1.88722	2.04928	1.54739	1.58228	2.48331	2.41938
Cell_0148	AMPKARt2	Glucose 17 mM + Glutamine 2.500000e-01 mM + Insulin 10000 ng/ml + EAA 1.000000e-01 X	0.37654	0.40939	0.521246	0.496786	0.659899	0.727425	0.490998	0.545543	0.332891	0.435125	0.56715	0.609662	0.561681	0.640771	0.675788	0.556025	0.768827	0.61443	0.710902	0.464567	0.621329	0.590792	0.60354	0.450041	0.417725	0.5577	0.617785	0.63261	0.528272	0.69277	0.729166	0.606645	0.655163	0.649206	0.50601	0.725182	0.463186	0.388192	0.657573	0.631815	0.614622	0.628892	0.63752	0.605723	0.73974	0.603732	0.629993
Cell_0149	TFEB_TR	Glucose 17 mM + Glutamine 2.500000e-01 mM + Insulin 10000 ng/ml + EAA 1.000000e-01 X	2.10019	1.45573	0.514968	1.16128	1.78754	1.31773	0.770286	1.48016	1.29081	1.82977	1.34652	1.29974	1.8782	1.70082	2.21929	1.52385	1.15881	1.65916	2.85001	2.39539	1.80339	1.60592	1.14036	2.74457	2.85619	1.1742	2.72342	1.61128	1.66732	0.811274	3.08415	1.49522	2.32386	1.2743	1.4152	1.00561	2.01951	3.36097	0.758701	1.82961	2.20315	1.77186	1.31031	0.830211	0.990262	1.49549	2.45365
Cell_0149	FOXO_TR	Glucose 17 mM + Glutamine 2.500000e-01 mM + Insulin 10000 ng/ml + EAA 1.000000e-01 X	2.5153	0.848368	1.56416	1.60485	2.64165	2.4957	1.63011	1.97072	1.97415	3.06989	1.22324	1.77117	3.24049	2.47836	2.82986	1.6114	1.69803	3.16131	2.74581	2.65797	1.57358	1.73703	2.30491	2.95496	0.880793	1.70241	3.13373	2.55479	2.41332	1.34142	2.5153	2.1583	2.95053	2.86924	1.34817	2.91153	1.94599	2.90799	2.10288	1.62773	2.83387	1.89203	2.06496	1.52242	1.61619	2.48367	2.53993
Cell_0149	AMPKARt2	Glucose 17 mM + Glutamine 2.500000e-01 mM + Insulin 10000 ng/ml + EAA 1.000000e-01 X	0.388586	0.426121	0.676561	0.501711	0.653548	0.729665	0.48657	0.554166	0.339084	0.430463	0.577568	0.611677	0.570275	0.641092	0.667166	0.551287	0.777245	0.606912	0.700304	0.459801	0.638044	0.593457	0.619764	0.451232	0.406155	0.564963	0.616027	0.648009	0.530813	0.682271	0.738548	0.604421	0.650328	0.629942	0.509994	0.730321	0.467802	0.406972	0.65769	0.628183	0.620284	0.617146	0.626407	0.599743	0.722191	0.608119	0.632747
Cell_0150	TFEB_TR	Glucose 17 mM + Glutamine 2.500000e-01 mM + Insulin 10000 ng/ml + EAA 1.000000e-01 X	2.15158	1.4675	0.571141	1.1571	1.86323	1.16765	0.781571	1.89936	1.34448	1.80993	1.54269	1.31851	1.87713	1.61972	2.34987	1.42478	1.29353	1.85944	2.87783	2.29267	1.58601	1.29127	1.33205	2.75613	3.15565	1.34076	3.33485	1.29958	1.59666	0.818044	2.55471	1.44126	2.55339	1.40421	1.43838	1.11657	1.86521	3.08715	0.779838	1.88114	2.11635	1.83827	1.21799	0.877792	0.907429	1.43565	2.54619
Cell_0150	FOXO_TR	Glucose 17 mM + Glutamine 2.500000e-01 mM + Insulin 10000 ng/ml + EAA 1.000000e-01 X	2.54202	0.847237	1.6028	1.6321	2.56579	2.82415	1.58394	2.09691	1.92109	3.14423	1.22148	1.85258	3.1777	2.45416	2.84081	1.47481	1.6792	3.17068	2.70783	2.43887	1.61333	1.68323	2.44211	2.98218	1.22827	1.58734	3.10791	2.41636	2.37937	1.31213	2.53894	2.16106	3.03657	2.88807	1.33404	2.96079	1.98254	2.94742	2.08077	1.53499	2.89457	1.87073	1.94672	1.50624	1.75376	2.50664	2.70212
Cell_0150	AMPKARt2	Glucose 17 mM + Glutamine 2.500000e-01 mM + Insulin 10000 ng/ml + EAA 1.000000e-01 X	0.409487	0.441525	0.690626	0.493857	0.656051	0.727436	0.481762	0.586703	0.351439	0.450792	0.58389	0.632097	0.574604	0.650213	0.660305	0.527766	0.778914	0.61955	0.695186	0.465317	0.642537	0.607841	0.641624	0.449186	0.409818	0.553716	0.606538	0.655516	0.524599	0.673473	0.743506	0.605646	0.647753	0.62619	0.522869	0.736714	0.485594	0.441818	0.646846	0.630937	0.617323	0.580206	0.627678	0.595292	0.71028	0.603806	0.637965
Cell_0151	TFEB_TR	Glucose 17 mM + Glutamine 2.500000e-01 mM + Insulin 10000 ng/ml + EAA 1.000000e-01 X	2.09034	1.49624	0.516835	1.1562	1.94819	1.18012	0.808249	2.07221	1.33995	1.85535	1.71069	1.29192	2.04576	1.84603	2.2406	1.44988	1.11596	1.88687	2.45726	1.98103	1.52196	1.31957	1.33471	2.82872	3.41079	1.38025	3.79027	1.25824	1.57033	0.907795	3.43655	1.47272	2.03044	1.42358	1.38172	1.14549	1.56863	3.19347	0.867129	1.68164	2.07659	1.78415	1.14019	0.899591	0.718089	1.10475	2.72637
Cell_0151	FOXO_TR	Glucose 17 mM + Glutamine 2.500000e-01 mM + Insulin 10000 ng/ml + EAA 1.000000e-01 X	2.45707	0.853486	1.59631	1.60566	2.3686	2.76733	1.50861	2.14188	1.90639	3.23709	1.24244	1.92639	3.3373	2.30211	2.81653	1.37476	1.84542	3.12232	2.69107	2.20052	1.59406	2.68187	2.52347	3.02063	1.87053	1.47987	3.05742	2.33109	2.34195	1.26949	2.59967	2.20711	3.03417	2.79837	1.34268	2.70196	2.01359	2.8347	2.11797	1.43593	2.80982	1.80839	1.90995	1.42571	1.9653	2.57418	2.74479
Cell_0151	AMPKARt2	Glucose 17 mM + Glutamine 2.500000e-01 mM + Insulin 10000 ng/ml + EAA 1.000000e-01 X	0.416737	0.445987	0.682794	0.492148	0.65143	0.72496	0.468444	0.586042	0.352899	0.467336	0.583199	0.637246	0.5666	0.638415	0.668199	0.535582	0.787694	0.627601	0.720159	0.464897	0.626632	0.634849	0.653278	0.448201	0.420909	0.550389	0.59762	0.655862	0.507013	0.664617	0.739251	0.608043	0.646762	0.638761	0.545788	0.733917	0.46896	0.445829	0.625063	0.621912	0.615955	0.583946	0.6386	0.615447	0.705497	0.604622	0.622775
Cell_0152	TFEB_TR	Glucose 17 mM + Glutamine 2.500000e-01 mM + Insulin 10000 ng/ml + EAA 1.000000e-01 X	2.03947	1.56846	0.531627	1.14703	2.05392	1.23623	0.822009	1.41967	1.20819	1.89965	1.46016	1.25511	2.12377	2.04503	2.10332	1.6097	0.948791	1.64947	2.32468	1.6782	1.78994	1.18797	1.23774	2.90869	3.63194	1.52069	3.70817	1.42429	1.666	1.06071	3.21171	1.39044	2.77125	1.52079	1.23942	1.15475	1.25392	3.9252	0.961639	1.50952	2.19233	1.65485	1.24446	0.915949	0.723636	1.25076	2.93627
Cell_0152	FOXO_TR	Glucose 17 mM + Glutamine 2.500000e-01 mM + Insulin 10000 ng/ml + EAA 1.000000e-01 X	2.43883	0.886646	1.56835	1.59502	2.36159	2.70937	1.45813	2.00999	1.96706	3.2945	1.21169	1.96652	3.38344	2.31278	2.81078	1.32103	1.90181	3.11043	2.57405	1.97244	1.56109	2.78327	2.40647	3.03796	2.23623	1.41278	3.03215	2.35216	2.42235	1.27664	2.64067	2.23848	2.91043	2.87367	1.36419	2.49783	1.89647	2.64216	2.3001	1.36931	2.86865	1.74726	1.97783	1.86788	2.07573	2.55054	2.77635
Cell_0152	AMPKARt2	Glucose 17 mM + Glutamine 2.500000e-01 mM + Insulin 10000 ng/ml + EAA 1.000000e-01 X	0.430076	0.454959	0.672691	0.51	0.642859	0.728571	0.459252	0.561764	0.36125	0.472691	0.593927	0.608047	0.560113	0.624662	0.670164	0.566397	0.794469	0.6282	0.716722	0.458381	0.623336	0.643306	0.670418	0.448923	0.419409	0.54716	0.618269	0.667512	0.503858	0.671767	0.744703	0.611274	0.654602	0.633445	0.551708	0.73164	0.470038	0.416697	0.61745	0.607989	0.628713	0.614282	0.645984	0.612154	0.700017	0.611025	0.602752
Cell_0153	TFEB_TR	Glucose 17 mM + Glutamine 2.500000e-01 mM + Insulin 10000 ng/ml + EAA 1.000000e-01 X	2.07925	1.5893	0.653907	1.13995	2.0498	1.11197	0.833969	1.13725	1.12121	1.88716	1.47185	1.24849	2.05767	1.09044	2.23958	1.56114	1.14513	1.57954	2.56914	1.53691	1.82111	1.19227	1.15457	2.98735	3.84504	1.69725	3.29084	1.56509	1.63801	1.09728	2.31566	1.42817	4.1396	1.80488	1.14322	1.14883	1.63636	4.08132	1.01373	1.67	0.940301	1.50204	1.33804	1.06205	0.931548	1.63468	3.03009
Cell_0153	FOXO_TR	Glucose 17 mM + Glutamine 2.500000e-01 mM + Insulin 10000 ng/ml + EAA 1.000000e-01 X	2.48637	0.899733	1.53969	1.60964	2.35846	2.74598	1.47551	1.89062	1.98726	3.30685	1.21595	1.89658	3.34479	2.37649	2.9072	1.28096	1.63329	3.18265	2.4973	1.81688	1.54217	2.73788	2.28893	3.02978	2.19683	1.38013	3.09045	2.37785	2.55085	1.31407	2.62568	2.2262	2.87897	3.23496	1.39037	2.54369	1.84368	2.65251	2.46147	1.33906	0.924911	1.73736	1.96733	2.80224	2.05259	2.48313	2.81973
Cell_0153	AMPKARt2	Glucose 17 mM + Glutamine 2.500000e-01 mM + Insulin 10000 ng/ml + EAA 1.000000e-01 X	0.45744	0.464032	0.673942	0.506109	0.652536	0.736126	0.468275	0.55211	0.365279	0.474395	0.619996	0.552372	0.561932	0.635671	0.660007	0.569815	0.773093	0.632693	0.697642	0.462725	0.632432	0.641465	0.691453	0.455377	0.41682	0.537948	0.643184	0.684499	0.506648	0.679599	0.746784	0.614272	0.661414	0.609086	0.545588	0.73581	0.511741	0.40972	0.620516	0.617905	0.517221	0.618017	0.655871	0.538264	0.693324	0.616673	0.618612
Cell_0154	TFEB_TR	Glucose 17 mM + Glutamine 2.500000e-01 mM + Insulin 10000 ng/ml + EAA 1.000000e-01 X	2.05506	1.56309	0.662117	1.13755	1.98522	1.11191	0.87957	1.51836	1.04581	1.84337	1.80354	1.31179	1.90097	0.609175	2.13688	1.3619	1.24079	1.72631	2.60058	1.48658	1.57242	1.16566	1.09093	3.07734	4.00325	1.61006	3.06586	1.55999	1.59292	1.0113	2.39895	1.70393	3.5656	1.88403	1.12315	1.10345	2.25451	3.42146	1.02374	1.82175	0.927044	1.51235	1.48524	1.25988	1.18112	1.52568	2.75945
Cell_0154	FOXO_TR	Glucose 17 mM + Glutamine 2.500000e-01 mM + Insulin 10000 ng/ml + EAA 1.000000e-01 X	2.37718	0.86158	1.48485	1.59949	2.26979	2.71418	1.51676	1.87264	1.9215	3.31997	1.49505	1.75725	3.44074	2.28084	2.9028	1.26337	1.48742	3.26305	2.55304	1.77637	1.5216	2.7084	2.30134	3.01531	2.11055	1.35063	3.13089	2.46705	2.53957	1.26269	2.53678	2.25057	2.94209	3.27545	1.38347	2.62705	1.94598	2.75899	2.45996	1.3034	0.905351	1.72486	2.0628	3.19734	1.98369	2.48191	2.68784
Cell_0154	AMPKARt2	Glucose 17 mM + Glutamine 2.500000e-01 mM + Insulin 10000 ng/ml + EAA 1.000000e-01 X	0.462608	0.462962	0.672403	0.486756	0.687807	0.723722	0.475048	0.559658	0.356164	0.462532	0.612528	0.526542	0.562527	0.643856	0.649465	0.560185	0.765907	0.632946	0.700481	0.468381	0.634914	0.658911	0.695062	0.463981	0.418679	0.547871	0.644363	0.692142	0.512583	0.679949	0.726416	0.611316	0.655473	0.606254	0.543496	0.729324	0.498222	0.426149	0.614397	0.635784	0.509082	0.602259	0.669926	0.45479	0.678288	0.615517	0.641195
Cell_0155	TFEB_TR	Glucose 17 mM + Glutamine 2.500000e-01 mM + Insulin 10000 ng/ml + EAA 1.000000e-01 X	1.94566	1.56736	0.570159	1.11609	1.98519	1.23426	0.920685	1.05696	1.07874	1.91946	1.9583	1.37612	1.84348	1.43904	1.9479	1.40333	0.969786	1.8944	2.48579	1.48068	1.78901	1.14811	1.29251	3.13567	4.24325	1.53135	3.03405	1.50049	1.74164	0.982358	2.57665	1.77463	2.51759	1.67609	1.16414	1.0668	1.99531	3.78466	1.00702	1.78488	0.928577	1.6131	1.74096	1.36911	1.25496	1.5525	2.66728
Cell_0155	FOXO_TR	Glucose 17 mM + Glutamine 2.500000e-01 mM + Insulin 10000 ng/ml + EAA 1.000000e-01 X	2.24455	0.847584	1.42434	1.55159	2.32681	2.68168	1.52271	2.05563	1.88728	3.34657	1.94127	1.67574	3.60036	2.27905	2.84913	1.25844	1.62576	3.28135	2.57102	1.7729	1.50599	2.74729	2.39868	2.96267	2.11569	1.31655	3.05842	2.56605	2.40561	1.29274	2.42961	2.32409	2.90934	2.95456	1.33487	2.64145	1.93687	2.70496	2.40407	1.27011	0.903602	1.70706	2.30206	3.02543	1.92124	2.51994	2.47757
Cell_0155	AMPKARt2	Glucose 17 mM + Glutamine 2.500000e-01 mM + Insulin 10000 ng/ml + EAA 1.000000e-01 X	0.448121	0.473582	0.671384	0.498794	0.714139	0.70148	0.464009	0.689492	0.364753	0.452794	0.56288	0.565253	0.556927	0.633408	0.641213	0.571275	0.7851	0.632135	0.697754	0.460697	0.632412	0.670227	0.676679	0.463757	0.416124	0.551965	0.646292	0.699497	0.531062	0.702783	0.708861	0.601873	0.651153	0.612085	0.544696	0.717646	0.446471	0.41183	0.601861	0.640239	0.51984	0.597565	0.66539	0.432229	0.664281	0.617166	0.631856
Cell_0156	TFEB_TR	Glucose 17 mM + Glutamine 2.500000e-01 mM + Insulin 10000 ng/ml + EAA 1.000000e-01 X	1.87251	1.54431	0.590209	1.08553	1.93323	1.19105	0.908748	1.01653	1.30706	2.21245	2.02464	1.36096	2.09594	1.61238	2.19053	1.51275	0.814253	2.00441	2.45798	1.44461	2.20142	1.18229	1.5696	3.11099	4.49702	1.70149	2.67283	1.34354	1.77675	1.05879	2.15143	1.55554	2.6945	1.48565	1.1912	1.11693	1.2343	5.02855	1.00691	1.81887	0.946587	1.57238	1.73568	1.42241	1.19219	1.81992	3.05995
Cell_0156	FOXO_TR	Glucose 17 mM + Glutamine 2.500000e-01 mM + Insulin 10000 ng/ml + EAA 1.000000e-01 X	2.26481	0.878803	1.42087	1.51203	2.40337	2.77375	1.4971	1.92341	1.95645	3.35469	2.20332	1.64739	3.65731	2.43115	2.96187	1.22753	1.66746	3.28027	2.52786	1.72892	1.50402	2.68728	2.50657	2.87524	2.08528	1.31717	2.98614	2.52136	2.34813	1.73622	2.36871	2.36033	2.83918	2.85523	1.34081	2.70226	1.89481	2.59882	2.41548	1.2922	0.907735	1.71027	2.32092	3.02669	1.88725	2.60233	2.4482
Cell_0156	AMPKARt2	Glucose 17 mM + Glutamine 2.500000e-01 mM + Insulin 10000 ng/ml + EAA 1.000000e-01 X	0.44749	0.493086	0.671416	0.518396	0.708852	0.702381	0.463291	0.685368	0.391258	0.463778	0.537793	0.592548	0.555458	0.6308	0.632702	0.577003	0.754572	0.640267	0.690019	0.45594	0.622041	0.6512	0.656947	0.467031	0.423284	0.535523	0.657406	0.709294	0.538468	0.705966	0.707044	0.598511	0.659159	0.596919	0.554485	0.73955	0.463715	0.379082	0.602502	0.647393	0.522906	0.611083	0.64295	0.44464	0.666497	0.63284	0.630578
Cell_0157	TFEB_TR	Glucose 17 mM + Glutamine 2.500000e-01 mM + Insulin 10000 ng/ml + EAA 1.000000e-01 X	1.87234	1.50504	0.67197	1.08115	1.82273	1.19016	0.902163	1.08214	1.45198	2.40365	2.20977	1.29486	2.31317	1.16067	2.37351	1.38632	0.865057	1.90869	2.23619	1.37142	2.01191	1.17458	1.48688	3.01914	4.52806	1.80399	1.7648	1.2469	1.65744	1.18008	1.77431	1.449	2.70892	1.42186	1.11769	1.27613	1.01187	4.71344	1.06025	1.84511	0.979805	1.48246	1.56918	1.46148	1.28773	1.55882	3.1491
Cell_0157	FOXO_TR	Glucose 17 mM + Glutamine 2.500000e-01 mM + Insulin 10000 ng/ml + EAA 1.000000e-01 X	2.31165	0.888541	1.45663	1.51591	2.32863	2.88541	1.47936	1.8634	2.01441	3.34604	2.35531	1.62213	3.60368	2.44588	2.97075	1.17735	1.72609	3.26093	2.51945	1.68243	1.50578	2.57448	2.5964	2.8247	2.01552	1.34087	1.48334	2.46793	2.39416	2.35509	2.31326	2.34733	2.82764	2.87263	1.36266	2.78948	2.05354	2.67633	2.53137	1.32843	0.916253	1.6819	2.18214	3.0602	1.8707	2.69133	2.51776
Cell_0157	AMPKARt2	Glucose 17 mM + Glutamine 2.500000e-01 mM + Insulin 10000 ng/ml + EAA 1.000000e-01 X	0.445356	0.490476	0.65799	0.511316	0.700641	0.706955	0.475795	0.690463	0.399713	0.469842	0.553117	0.563875	0.576932	0.633782	0.627539	0.568436	0.691558	0.645521	0.700092	0.464997	0.598401	0.655223	0.652335	0.484199	0.446837	0.531272	0.606739	0.704434	0.528455	0.62383	0.702704	0.61168	0.66234	0.589148	0.57046	0.750382	0.507002	0.38458	0.60647	0.658544	0.514242	0.62149	0.635361	0.445908	0.668445	0.635563	0.654172
Cell_0158	TFEB_TR	Glucose 17 mM + Glutamine 2.500000e-01 mM + Insulin 10000 ng/ml + EAA 1.000000e-01 X	1.92229	1.5571	0.669475	1.08217	1.83474	1.3054	0.934424	1.06807	1.31027	2.25282	2.35512	1.26708	2.14677	1.49176	2.42167	1.30911	0.860909	1.72855	1.95719	1.40541	1.76583	1.24951	1.21434	2.87608	4.49514	1.7767	1.54254	1.4737	1.7369	1.18612	1.74232	1.50041	2.13985	1.44008	1.09513	1.37094	1.3747	3.19365	1.12438	1.80038	1.01266	1.48095	1.70524	1.50314	1.42117	1.49148	2.88549
Cell_0158	FOXO_TR	Glucose 17 mM + Glutamine 2.500000e-01 mM + Insulin 10000 ng/ml + EAA 1.000000e-01 X	2.33664	0.888731	1.46852	1.52631	2.28836	2.89313	1.48451	1.81329	1.95851	3.33005	2.63317	1.62557	3.57771	2.37434	2.75541	1.11773	1.93862	3.16069	2.4631	1.72072	1.49902	2.57662	2.67219	2.79347	2.0312	1.30836	1.48826	2.55723	2.40947	2.66517	2.22122	2.3222	2.82385	2.7636	1.30762	2.78287	2.32653	2.86623	2.66444	1.33434	0.952337	1.69345	2.20594	2.97399	1.86254	2.67668	2.51694
Cell_0158	AMPKARt2	Glucose 17 mM + Glutamine 2.500000e-01 mM + Insulin 10000 ng/ml + EAA 1.000000e-01 X	0.430804	0.482199	0.663778	0.504291	0.704259	0.692971	0.475004	0.705329	0.392993	0.462454	0.564101	0.55305	0.604131	0.631249	0.634314	0.575789	0.67614	0.641945	0.711095	0.470209	0.583132	0.673709	0.654221	0.496958	0.457922	0.532057	0.602979	0.69118	0.531478	0.528894	0.695561	0.627049	0.655939	0.592691	0.571357	0.675245	0.506778	0.407671	0.590915	0.65979	0.522552	0.606201	0.645252	0.446351	0.665307	0.617739	0.651271
Cell_0159	TFEB_TR	Glucose 17 mM + Glutamine 2.500000e-01 mM + Insulin 10000 ng/ml + EAA 1.000000e-01 X	1.98256	1.6111	0.671227	1.05387	1.8374	1.24727	0.936256	0.986857	1.25855	2.10149	2.42347	1.31373	1.98754	1.61679	2.64713	1.39985	1.06608	1.77375	2.04879	1.50795	2.03832	1.32441	1.10803	2.68543	4.52412	1.85422	1.75223	1.52606	1.87918	1.19063	1.82786	1.44195	1.88201	1.45104	1.18357	1.26489	1.7087	2.93786	1.13873	1.8671	1.03611	1.53341	1.94356	1.55849	1.27773	0.8011	3.0047
Cell_0159	FOXO_TR	Glucose 17 mM + Glutamine 2.500000e-01 mM + Insulin 10000 ng/ml + EAA 1.000000e-01 X	2.37752	0.888931	1.4619	1.5126	2.32986	2.82261	1.49328	1.78376	1.91457	3.27922	2.89583	1.62872	3.6184	2.4311	2.68869	1.13507	1.80004	3.0764	2.38623	1.80519	1.47776	2.61896	2.72084	2.72673	2.1013	1.25441	1.44521	2.64306	2.38774	2.77496	2.13161	2.26288	2.85901	2.79655	1.28849	2.75064	2.48443	2.98566	2.64198	1.33553	0.997146	1.81104	2.27348	3.1129	1.85853	1.34234	2.51633
Cell_0159	AMPKARt2	Glucose 17 mM + Glutamine 2.500000e-01 mM + Insulin 10000 ng/ml + EAA 1.000000e-01 X	0.429635	0.493284	0.691766	0.514662	0.70192	0.68408	0.481491	0.712391	0.39548	0.464785	0.573157	0.576946	0.593955	0.645782	0.645667	0.588789	0.670299	0.642428	0.713523	0.463804	0.596677	0.648785	0.652693	0.496189	0.455441	0.530293	0.609318	0.695728	0.544033	0.506826	0.692781	0.629355	0.661225	0.584841	0.554603	0.610875	0.494619	0.397459	0.574138	0.65767	0.529783	0.584633	0.654539	0.474737	0.673998	0.589556	0.629801
Cell_0160	TFEB_TR	Glucose 17 mM + Glutamine 2.500000e-01 mM + Insulin 10000 ng/ml + EAA 1.000000e-01 X	2.0099	1.58195	0.714093	1.03639	1.69277	1.1592	0.917777	1.04382	1.53217	2.17164	2.37613	1.34248	2.01501	1.13425	2.56119	1.36775	1.4237	1.86255	2.23202	1.5251	2.16853	1.21245	1.17044	2.52816	4.40455	1.91402	1.88433	1.19253	1.84701	1.61728	1.66115	1.36176	2.19516	1.46777	1.14577	1.13834	1.77918	3.80044	1.13581	1.84143	1.06795	1.6447	1.91136	1.55481	1.12356	0.763554	3.3269
Cell_0160	FOXO_TR	Glucose 17 mM + Glutamine 2.500000e-01 mM + Insulin 10000 ng/ml + EAA 1.000000e-01 X	2.36858	0.866739	1.46387	1.5298	2.29054	2.7273	1.50903	1.8657	1.98914	3.19098	2.99128	1.59951	3.56636	2.51812	2.77253	1.43531	1.46424	3.09519	2.45701	1.84966	1.44037	2.60386	2.74626	2.67734	2.10864	1.27939	1.4106	2.62549	2.3774	2.92813	2.06356	2.18251	2.92495	2.92932	1.26057	2.78297	2.33346	3.03005	2.5689	1.29901	1.01342	1.8704	2.21794	3.26921	1.7933	1.27855	2.56917
Cell_0160	AMPKARt2	Glucose 17 mM + Glutamine 2.500000e-01 mM + Insulin 10000 ng/ml + EAA 1.000000e-01 X	0.431943	0.498333	0.649959	0.520761	0.695198	0.683283	0.510649	0.704129	0.403989	0.471482	0.587061	0.576776	0.568332	0.666928	0.642908	0.58987	0.624748	0.646314	0.702519	0.460597	0.625362	0.634289	0.653303	0.490978	0.465494	0.545166	0.61792	0.712339	0.53646	0.518719	0.691465	0.622159	0.674782	0.590702	0.550749	0.653339	0.484281	0.374095	0.570969	0.661115	0.510208	0.585591	0.661521	0.516639	0.677964	0.604139	0.642333
Cell_0161	TFEB_TR	Glucose 17 mM + Glutamine 2.500000e-01 mM + Insulin 10000 ng/ml + EAA 1.000000e-01 X	1.998	1.58472	0.640546	1.05442	1.64293	1.29093	0.945969	1.16103	1.57243	2.2957	2.34656	1.33421	0.746562	1.44745	2.33776	1.31353	1.42678	1.79707	2.17057	1.60727	1.88385	1.19477	1.2365	2.4556	4.22302	1.82157	1.7192	1.25238	1.76746	2.00687	1.4885	1.46647	2.58654	1.6051	1.07397	1.12864	1.93426	4.13582	1.15881	1.67625	1.09394	1.7377	1.82507	1.501	1.20225	0.748495	3.45409
Cell_0161	FOXO_TR	Glucose 17 mM + Glutamine 2.500000e-01 mM + Insulin 10000 ng/ml + EAA 1.000000e-01 X	2.34195	0.878084	1.44489	1.57616	2.22087	2.64336	1.54083	2.00474	2.05662	3.10347	3.02622	1.60868	2.05517	2.46825	2.79586	2.00626	1.63382	3.08838	2.56044	1.92784	1.389	2.59514	2.73881	2.66925	2.10635	1.33644	1.43784	2.56849	2.33636	2.99323	1.98956	2.15435	2.94503	2.88843	1.23831	2.75937	2.09897	3.05967	2.62193	1.26551	1.02451	1.84175	2.14917	3.20016	1.67849	1.23551	2.5792
Cell_0161	AMPKARt2	Glucose 17 mM + Glutamine 2.500000e-01 mM + Insulin 10000 ng/ml + EAA 1.000000e-01 X	0.431415	0.487592	0.539124	0.513032	0.695907	0.673675	0.522583	0.702245	0.414004	0.472832	0.572609	0.562739	0.644065	0.660605	0.639024	0.599055	0.582121	0.642229	0.674799	0.46363	0.646368	0.665022	0.657406	0.487179	0.468607	0.555991	0.620843	0.712116	0.522004	0.535877	0.691794	0.613799	0.673086	0.602229	0.578047	0.687168	0.481987	0.370906	0.561997	0.670092	0.500584	0.596268	0.65792	0.529567	0.66531	0.590777	0.658064
Cell_0162	TFEB_TR	Glucose 17 mM + Glutamine 2.500000e-01 mM + Insulin 10000 ng/ml + EAA 1.000000e-01 X	1.96382	1.62777	0.551559	1.05634	1.74211	1.47247	0.969441	1.1949	1.33905	2.43101	2.70931	1.39746	0.855963	1.88104	2.55691	1.44218	1.49663	1.85508	2.17216	1.87646	1.68154	1.30601	1.27556	2.42798	4.25126	1.75723	1.78872	1.56883	1.70615	1.64078	1.95328	1.54468	2.19891	1.65255	1.24096	1.12249	2.08432	3.8398	1.17359	1.66284	1.0777	1.72018	1.95063	1.49111	1.21538	0.796659	3.56039
Cell_0162	FOXO_TR	Glucose 17 mM + Glutamine 2.500000e-01 mM + Insulin 10000 ng/ml + EAA 1.000000e-01 X	2.36297	0.873604	1.38346	1.55594	2.29746	2.65301	1.55419	2.05226	2.01679	3.02665	3.06883	1.65146	2.22205	2.35956	2.85613	2.48286	1.92887	3.05468	2.57583	2.07797	1.36338	2.56302	2.69738	2.66721	2.15287	1.36374	1.47658	2.45874	2.27861	2.96206	1.92374	2.16965	2.98284	2.76344	1.77677	2.6466	2.14435	3.08799	2.66335	1.34625	1.03533	1.85376	2.12983	3.24529	1.62654	1.25886	2.51939
Cell_0162	AMPKARt2	Glucose 17 mM + Glutamine 2.500000e-01 mM + Insulin 10000 ng/ml + EAA 1.000000e-01 X	0.458062	0.490947	0.468718	0.50522	0.699939	0.661904	0.50608	0.707753	0.422463	0.479296	0.549245	0.565876	0.643071	0.647562	0.655481	0.614407	0.573048	0.637964	0.67017	0.461229	0.65583	0.660166	0.65816	0.486092	0.453167	0.566517	0.626584	0.697319	0.532161	0.572634	0.691715	0.618557	0.664142	0.583255	0.594832	0.65077	0.493362	0.373956	0.54766	0.673077	0.514012	0.588441	0.644552	0.516031	0.666384	0.576618	0.633618
Cell_0163	TFEB_TR	Glucose 17 mM + Glutamine 2.500000e-01 mM + Insulin 10000 ng/ml + EAA 1.000000e-01 X	1.90908	1.63684	0.757115	1.0399	1.8149	1.47806	0.940096	1.21577	1.51175	2.48961	3.03131	1.44426	0.920874	1.38326	2.59502	1.52694	1.93911	2.00542	2.40436	2.02595	1.61371	1.25588	1.4093	2.42938	4.28803	1.69639	2.03441	1.35061	1.73426	1.29709	2.30232	0.499791	1.85811	1.45595	1.42729	1.04219	1.8392	3.5942	1.18093	1.62959	1.05612	1.69735	2.01707	1.47185	1.17708	0.843893	3.55245
Cell_0163	FOXO_TR	Glucose 17 mM + Glutamine 2.500000e-01 mM + Insulin 10000 ng/ml + EAA 1.000000e-01 X	2.33323	0.831211	1.32689	1.50754	2.44545	2.75906	1.55833	2.00658	1.91806	2.95339	3.07583	1.62839	2.21941	2.3359	2.8926	2.5895	1.81651	3.1164	2.68526	2.15244	1.37604	2.46526	2.72822	2.70116	2.17911	1.38334	1.45065	2.29086	2.2755	2.96356	1.91943	1.57309	3.05203	2.67132	2.82679	2.5976	2.16133	3.10315	2.6546	1.41659	1.01666	1.83127	2.10917	3.42412	1.61279	1.3072	2.46793
Cell_0163	AMPKARt2	Glucose 17 mM + Glutamine 2.500000e-01 mM + Insulin 10000 ng/ml + EAA 1.000000e-01 X	0.488268	0.510748	0.434323	0.498577	0.698313	0.653202	0.491577	0.698955	0.408597	0.484092	0.563666	0.568055	0.652332	0.652846	0.670111	0.617293	0.581199	0.646744	0.691632	0.454684	0.658312	0.625929	0.657533	0.485406	0.455937	0.607807	0.635149	0.693921	0.552301	0.598861	0.695652	0.538103	0.666589	0.572513	0.557012	0.641049	0.479365	0.370546	0.544166	0.6639	0.513774	0.564071	0.645088	0.511625	0.680937	0.587929	0.614588
Cell_0164	TFEB_TR	Glucose 17 mM + Glutamine 2.500000e-01 mM + Insulin 10000 ng/ml + EAA 1.000000e-01 X	1.81316	1.67561	1.12805	1.05364	1.89779	1.30431	0.90248	1.26525	1.75571	2.35538	3.07526	1.33912	0.857359	1.05004	2.3202	1.41673	1.91902	1.89587	2.53643	1.9405	1.51835	1.23371	1.49452	2.43415	4.03304	1.51996	1.94864	1.10106	1.90055	1.6398	1.67128	0.493138	2.58625	1.43098	1.49886	0.914045	1.52738	3.65938	1.21192	1.57981	1.09208	1.69719	1.73086	1.40835	1.33313	0.806952	3.14549
Cell_0164	FOXO_TR	Glucose 17 mM + Glutamine 2.500000e-01 mM + Insulin 10000 ng/ml + EAA 1.000000e-01 X	2.22562	1.08208	1.29067	1.55002	2.45473	2.76602	1.55945	2.00744	1.85787	2.9166	3.05346	1.54095	2.17392	2.33965	2.79569	2.46537	1.74797	3.17163	2.83122	2.12336	1.35292	2.40713	2.79094	2.75157	2.18419	1.36342	1.38238	2.17475	2.30214	2.92463	1.95026	1.59331	3.05844	2.63317	3.42483	2.54573	1.96604	3.08341	2.70565	1.40832	1.04879	1.74908	2.06256	3.43086	1.5788	1.34737	2.41572
Cell_0164	AMPKARt2	Glucose 17 mM + Glutamine 2.500000e-01 mM + Insulin 10000 ng/ml + EAA 1.000000e-01 X	0.49163	0.523734	0.382319	0.488889	0.689082	0.650037	0.494917	0.696501	0.392531	0.479607	0.586851	0.570323	0.657202	0.658059	0.661991	0.614468	0.586092	0.656773	0.684531	0.452654	0.662985	0.628271	0.66074	0.485441	0.47005	0.61792	0.631198	0.703878	0.556968	0.5985	0.709028	0.539397	0.674865	0.581988	0.511449	0.658114	0.459949	0.368538	0.546076	0.669188	0.517108	0.558247	0.655803	0.514094	0.67856	0.59457	0.62987
Cell_0165	TFEB_TR	Glucose 17 mM + Glutamine 2.500000e-01 mM + Insulin 10000 ng/ml + EAA 1.000000e-01 X	1.71366	1.76783	1.36138	1.08384	1.94912	1.25192	0.852133	1.29961	1.52599	2.33135	3.65278	1.2385	0.967531	1.0631	2.53559	1.30209	1.4616	1.69555	2.43275	1.91342	1.47606	1.32404	1.30743	2.42277	3.68961	1.50114	1.80129	1.30922	2.00042	1.86736	1.40703	0.474047	2.61723	1.70589	1.70681	0.86852	1.29268	3.79112	1.22356	1.80527	1.14676	1.6784	1.46652	1.39759	1.38497	0.740673	2.70229
Cell_0165	FOXO_TR	Glucose 17 mM + Glutamine 2.500000e-01 mM + Insulin 10000 ng/ml + EAA 1.000000e-01 X	2.21405	1.71178	1.2294	1.6292	2.36148	2.61339	1.46157	2.05721	1.95086	2.92971	3.06795	1.46081	2.17612	2.30676	2.78505	2.39036	1.8571	3.17101	2.74771	2.09289	1.40671	2.35429	2.73795	2.75354	2.20817	1.33883	1.36671	2.16031	2.30255	2.883	1.93175	1.55689	3.02772	2.65749	3.44597	2.36033	2.02717	3.05858	2.67778	1.46621	1.19733	1.7399	2.00457	3.35236	1.58822	1.39574	2.33193
Cell_0165	AMPKARt2	Glucose 17 mM + Glutamine 2.500000e-01 mM + Insulin 10000 ng/ml + EAA 1.000000e-01 X	0.498653	0.524267	0.356024	0.494538	0.678455	0.656634	0.514435	0.708028	0.428626	0.479981	0.580107	0.589584	0.654425	0.656603	0.65339	0.603525	0.58537	0.65018	0.662215	0.454486	0.68288	0.62148	0.661714	0.486125	0.466493	0.546394	0.621024	0.710203	0.5545	0.593937	0.710258	0.535499	0.680285	0.565952	0.521047	0.641735	0.473173	0.367912	0.538095	0.687527	0.550365	0.586149	0.657507	0.507901	0.674196	0.584591	0.634898
Cell_0166	TFEB_TR	Glucose 17 mM + Glutamine 2.500000e-01 mM + Insulin 10000 ng/ml + EAA 1.000000e-01 X	1.72807	1.85703	1.59106	1.1052	1.88881	1.47329	0.792621	1.30182	1.31091	2.56464	4.13935	1.27225	1.10245	0.989702	2.87689	1.37318	1.29854	1.69673	2.37592	1.90132	1.46764	1.33068	1.15139	2.44417	3.51437	1.70292	1.9862	1.33253	1.98826	1.72225	2.25901	0.452048	1.74515	1.79191	1.93607	1.0096	1.363	3.66444	1.20393	1.88333	1.1294	1.69936	1.55094	1.40256	1.16608	0.714973	2.83705
Cell_0166	FOXO_TR	Glucose 17 mM + Glutamine 2.500000e-01 mM + Insulin 10000 ng/ml + EAA 1.000000e-01 X	2.38144	2.22717	1.17913	1.65415	2.30239	2.54725	1.32841	2.02748	2.12808	2.93588	3.14587	1.4214	2.13961	2.3461	2.87879	2.41265	1.78815	3.23801	2.64022	2.03324	1.83508	2.21652	2.76379	2.74278	2.22908	1.3896	1.40511	2.18015	2.30401	2.96807	1.85858	1.51376	3.00826	2.61491	3.5194	2.23238	2.25644	3.14612	2.53423	1.41876	1.30884	1.73618	1.96788	3.36239	1.58822	1.37416	2.33285
Cell_0166	AMPKARt2	Glucose 17 mM + Glutamine 2.500000e-01 mM + Insulin 10000 ng/ml + EAA 1.000000e-01 X	0.49941	0.517091	0.37195	0.508923	0.669634	0.655483	0.524978	0.677402	0.479679	0.48527	0.569882	0.605212	0.656712	0.661082	0.6594	0.583891	0.594499	0.63915	0.669431	0.45589	0.686313	0.5797	0.656817	0.482623	0.470733	0.480756	0.625377	0.708752	0.545821	0.588561	0.695797	0.538026	0.682284	0.55815	0.548923	0.624874	0.467114	0.363233	0.523224	0.681123	0.563773	0.608434	0.657763	0.504012	0.684018	0.59246	0.621765
Cell_0167	TFEB_TR	Glucose 17 mM + Glutamine 2.500000e-01 mM + Insulin 10000 ng/ml + EAA 1.000000e-01 X	1.86272	1.94931	1.7812	1.13227	1.93626	1.53323	0.79654	1.32867	1.32548	2.64098	3.23978	1.32027	0.824636	1.40236	2.73817	1.52841	1.10775	1.13371	2.55078	1.77996	1.52275	1.49667	1.27758	2.47959	3.39615	1.76006	2.08374	1.08188	1.97163	1.69072	2.52373	0.462248	2.38175	1.66652	1.95978	1.17711	2.47684	3.69273	1.20809	1.66002	1.07133	1.69022	1.57557	1.35057	1.06861	0.711369	3.23747
Cell_0167	FOXO_TR	Glucose 17 mM + Glutamine 2.500000e-01 mM + Insulin 10000 ng/ml + EAA 1.000000e-01 X	2.53465	2.40793	1.19538	1.68362	2.27781	2.62066	1.3473	1.99496	2.15365	2.9093	3.18502	1.4159	2.06136	2.44646	2.8715	2.43504	1.72683	1.67336	2.76931	1.98838	2.50955	2.13855	2.96932	2.73953	2.24056	1.39926	1.41619	2.1695	2.3688	3.03246	1.77368	1.54027	2.97969	2.5281	3.6249	2.25566	2.18338	3.33874	2.4956	1.26168	1.2501	1.68091	1.98594	3.41581	1.49935	1.2993	2.42051
Cell_0167	AMPKARt2	Glucose 17 mM + Glutamine 2.500000e-01 mM + Insulin 10000 ng/ml + EAA 1.000000e-01 X	0.474328	0.509832	0.375442	0.496407	0.66862	0.640621	0.510865	0.612237	0.464666	0.483687	0.577595	0.600396	0.655568	0.673243	0.660262	0.578789	0.616481	0.597712	0.683908	0.452699	0.628929	0.562312	0.653976	0.481218	0.49044	0.494072	0.635498	0.707491	0.525662	0.587669	0.699085	0.539053	0.681718	0.589189	0.53912	0.628272	0.433806	0.358134	0.524667	0.676999	0.531756	0.599332	0.663671	0.503704	0.681358	0.610742	0.628846
Cell_0168	TFEB_TR	Glucose 17 mM + Glutamine 2.500000e-01 mM + Insulin 10000 ng/ml + EAA 1.000000e-01 X	1.97853	2.01567	1.66718	1.15768	2.11215	1.31006	0.829899	1.5008	1.37746	2.4322	2.16309	1.29582	0.635364	1.85686	2.51651	1.50688	0.913121	1.24621	2.74355	1.84821	1.75345	1.81696	1.41905	2.49327	3.32617	1.6889	1.7732	1.12597	1.93441	1.63563	1.74458	0.494467	3.37992	1.75063	1.90964	1.27932	3.01947	4.10199	1.21794	1.76212	1.11043	1.64488	1.42068	1.33794	1.19977	0.716646	3.1629
Cell_0168	FOXO_TR	Glucose 17 mM + Glutamine 2.500000e-01 mM + Insulin 10000 ng/ml + EAA 1.000000e-01 X	2.47597	2.45442	1.20943	1.75352	2.33475	2.6308	1.3968	2.08948	2.08946	2.88522	3.0226	1.39599	2.02102	2.44687	2.85646	2.41448	1.82081	1.63818	2.88315	2.08733	2.9487	2.14832	3.02784	2.74059	2.23355	1.33965	1.42811	2.11234	2.47144	2.97752	1.71397	1.59508	2.9451	2.5361	3.56778	2.25282	2.08095	3.36038	2.5358	1.67012	1.12539	1.71748	2.04753	3.50945	1.47461	1.34553	2.39336
Cell_0168	AMPKARt2	Glucose 17 mM + Glutamine 2.500000e-01 mM + Insulin 10000 ng/ml + EAA 1.000000e-01 X	0.481035	0.511282	0.357277	0.480673	0.683024	0.635929	0.509625	0.588387	0.431248	0.48415	0.580624	0.593322	0.647183	0.685503	0.646036	0.583634	0.637846	0.598469	0.681751	0.448264	0.575418	0.569827	0.653394	0.486286	0.486953	0.538105	0.629634	0.710372	0.514941	0.592889	0.716409	0.530609	0.681739	0.60301	0.516957	0.627578	0.437683	0.3611	0.545445	0.706818	0.500705	0.592908	0.667251	0.49821	0.674052	0.608819	0.649601
Cell_0169	TFEB_TR	Glucose 17 mM + Glutamine 2.500000e-01 mM + Insulin 10000 ng/ml + EAA 1.000000e-01 X	2.02097	1.98793	1.69219	1.17603	2.16347	1.26451	0.82709	1.67475	1.47533	2.28973	2.23172	1.23925	0.8774	1.91621	2.33917	1.40983	1.27831	1.1795	2.65649	2.01184	1.88797	1.82853	1.44574	2.53096	3.46842	1.67519	1.49883	1.39364	1.95459	1.5278	1.26919	0.503494	2.54623	1.88119	1.87575	1.35975	0.61532	4.0437	1.18059	2.1367	1.24787	1.70661	1.45691	1.38347	1.26662	0.741224	2.87656
Cell_0169	FOXO_TR	Glucose 17 mM + Glutamine 2.500000e-01 mM + Insulin 10000 ng/ml + EAA 1.000000e-01 X	2.31912	2.3768	1.18869	1.78748	2.48188	2.62059	1.41794	2.15581	2.17138	2.8561	2.78405	1.34812	2.04217	2.35914	2.92104	2.36146	1.80176	1.61408	2.86547	2.15557	3.07354	2.05883	2.93626	2.76601	2.20847	1.34937	1.49238	2.00722	2.49876	2.92849	1.70132	1.57573	2.9072	2.51854	3.52723	2.23343	1.13644	3.16919	2.499	2.6745	1.03981	1.79835	2.04781	3.62643	1.54685	1.44851	2.24131
Cell_0169	AMPKARt2	Glucose 17 mM + Glutamine 2.500000e-01 mM + Insulin 10000 ng/ml + EAA 1.000000e-01 X	0.528267	0.509429	0.363235	0.499498	0.688402	0.642247	0.537625	0.599509	0.451969	0.491222	0.568849	0.591942	0.655898	0.685707	0.640244	0.586767	0.645966	0.610268	0.672262	0.453417	0.609215	0.569315	0.652541	0.488109	0.460982	0.550778	0.611011	0.713574	0.518572	0.581883	0.721704	0.525502	0.682352	0.600922	0.519662	0.637889	0.673463	0.37202	0.566272	0.720985	0.488673	0.609785	0.664321	0.498259	0.694723	0.601853	0.655446
Cell_0170	TFEB_TR	Glucose 17 mM + Glutamine 2.500000e-01 mM + Insulin 10000 ng/ml + EAA 1.000000e-01 X	2.01766	1.9066	2.06066	1.21648	2.11077	1.38295	0.871285	1.63046	1.43025	2.29914	2.51431	1.20049	1.02591	1.97772	2.42166	1.46447	1.47455	1.25548	2.44552	1.9243	1.68177	1.65929	1.38336	2.52741	3.63631	1.61669	1.56903	1.57894	2.07788	1.66426	1.39319	0.503551	1.73515	1.7726	1.99835	1.29074	0.636122	3.56315	1.12616	2.36065	1.34616	1.7211	1.52898	1.3781	1.21514	0.742813	2.75327
Cell_0170	FOXO_TR	Glucose 17 mM + Glutamine 2.500000e-01 mM + Insulin 10000 ng/ml + EAA 1.000000e-01 X	2.25484	2.19753	1.18321	1.77369	2.52553	2.69149	1.79329	2.06813	2.25353	2.80304	2.85952	1.31748	2.11424	2.30473	2.91607	2.3398	1.72976	1.63101	2.92471	2.06373	3.07507	1.92526	2.94017	2.71575	2.22383	1.34253	1.51208	1.89509	2.45856	2.86559	1.69546	1.50095	2.8846	2.42751	3.57865	2.24799	1.12976	3.12781	2.47963	3.38218	0.970629	1.78567	1.93206	3.62438	1.53792	1.42498	2.08853
Cell_0170	AMPKARt2	Glucose 17 mM + Glutamine 2.500000e-01 mM + Insulin 10000 ng/ml + EAA 1.000000e-01 X	0.552648	0.488337	0.425799	0.512934	0.665437	0.637658	0.553892	0.597769	0.45504	0.486925	0.565641	0.583824	0.674942	0.680194	0.650618	0.600774	0.644309	0.611108	0.665805	0.459667	0.664371	0.571396	0.661031	0.491979	0.458095	0.544821	0.5906	0.711271	0.52057	0.567805	0.723492	0.526623	0.681116	0.621096	0.526171	0.662788	0.684251	0.38201	0.586978	0.710543	0.477694	0.619202	0.657855	0.506692	0.717039	0.606129	0.654941
Cell_0171	TFEB_TR	Glucose 17 mM + Glutamine 2.500000e-01 mM + Insulin 10000 ng/ml + EAA 1.000000e-01 X	1.97198	1.85863	1.93362	0.615894	2.04171	1.41011	0.993453	1.64436	1.36237	2.28292	2.50734	1.19871	0.992239	1.56291	3.17687	1.45784	1.07824	1.3994	2.50831	1.92752	1.52324	1.64909	1.19805	2.41468	3.55265	1.57351	1.70084	1.66467	2.16244	1.82026	1.81583	0.518794	2.03383	1.7649	2.30474	1.18736	0.65586	3.69855	1.11687	2.54623	1.41815	1.61986	1.51387	1.33523	1.28536	0.68215	2.37795
Cell_0171	FOXO_TR	Glucose 17 mM + Glutamine 2.500000e-01 mM + Insulin 10000 ng/ml + EAA 1.000000e-01 X	2.22582	2.12625	1.15529	1.50364	2.40279	2.71747	2.53182	1.92704	2.11342	2.7642	3.18012	1.29769	2.18455	2.28083	2.8632	2.35326	1.79888	1.66938	2.97636	2.06781	2.9889	1.91061	2.9648	2.58332	2.27554	1.37357	1.45639	1.88369	2.48211	2.74065	1.68804	1.46882	2.91249	2.40325	3.64686	2.16655	1.15383	3.21196	2.55171	3.59185	0.932087	1.78054	1.85479	3.50004	1.47513	1.35565	1.968
Cell_0171	AMPKARt2	Glucose 17 mM + Glutamine 2.500000e-01 mM + Insulin 10000 ng/ml + EAA 1.000000e-01 X	0.548122	0.467289	0.514452	0.652203	0.649217	0.62732	0.54391	0.589619	0.396764	0.475203	0.577785	0.579684	0.669832	0.686815	0.648826	0.612832	0.657728	0.596298	0.671761	0.45272	0.658074	0.579444	0.677657	0.505785	0.487664	0.561107	0.570199	0.700765	0.522674	0.576549	0.72655	0.530349	0.678371	0.624884	0.51052	0.66585	0.673386	0.388296	0.605454	0.71871	0.469785	0.605707	0.658197	0.509681	0.716631	0.609589	0.660016
Cell_0172	TFEB_TR	Glucose 17 mM + Glutamine 2.500000e-01 mM + Insulin 10000 ng/ml + EAA 1.000000e-01 X	1.96511	1.84793	1.37112	0.612109	1.92652	1.44117	1.05698	1.87245	1.51509	2.21622	2.73837	1.22553	0.937377	1.14953	3.54926	1.34454	1.04175	1.25954	2.63063	2.14383	1.73134	1.65388	1.10594	2.33862	3.40727	1.61736	1.72395	1.55346	2.10858	1.75087	2.13486	0.514452	2.0907	1.93641	2.33287	1.24821	0.653925	4.00531	1.16013	2.72049	1.55987	1.68605	1.73916	1.34292	1.4138	0.689288	1.96392
Cell_0172	FOXO_TR	Glucose 17 mM + Glutamine 2.500000e-01 mM + Insulin 10000 ng/ml + EAA 1.000000e-01 X	2.15489	2.15242	1.08925	1.46527	2.29193	2.72668	3.06342	1.78249	1.93652	2.7373	3.31386	1.30401	2.19197	2.24685	2.87076	2.30175	1.87674	1.68315	2.88148	2.15105	2.95738	1.93245	2.99954	2.55371	2.27542	1.78753	1.43829	1.96912	2.52493	2.64613	1.70041	1.47718	2.96101	2.38212	3.64453	2.02551	1.16557	3.12405	2.62272	3.69911	0.957186	1.80931	1.93545	3.45527	1.42793	1.33907	1.98839
Cell_0172	AMPKARt2	Glucose 17 mM + Glutamine 2.500000e-01 mM + Insulin 10000 ng/ml + EAA 1.000000e-01 X	0.534931	0.47039	0.562878	0.645487	0.65807	0.632199	0.533362	0.58285	0.374702	0.478217	0.574991	0.595517	0.655989	0.690239	0.638566	0.614793	0.683121	0.595495	0.678768	0.449182	0.630794	0.580562	0.688123	0.512588	0.499585	0.5772	0.558433	0.69216	0.52319	0.579227	0.726298	0.541273	0.674838	0.601463	0.494923	0.652444	0.666772	0.3938	0.607737	0.724365	0.465972	0.595283	0.668004	0.509261	0.725999	0.599839	0.664454
Cell_0173	TFEB_TR	Glucose 17 mM + Glutamine 2.500000e-01 mM + Insulin 10000 ng/ml + EAA 1.000000e-01 X	2.0447	1.85342	1.42417	0.60369	1.8771	1.45256	1.00533	2.02867	1.47187	2.11194	2.84829	1.25639	0.839072	1.75705	2.86142	1.435	1.29732	1.12453	2.38501	2.06975	1.90777	1.58732	0.5463	2.32187	3.44563	1.6114	1.76399	1.27054	1.95381	1.64018	1.94011	0.486454	2.20663	1.86732	2.06989	1.19425	0.621441	3.59173	1.21507	2.81393	1.69683	1.78149	1.91772	1.39244	1.221	0.855398	2.07593
Cell_0173	FOXO_TR	Glucose 17 mM + Glutamine 2.500000e-01 mM + Insulin 10000 ng/ml + EAA 1.000000e-01 X	2.11256	2.1763	1.06363	1.45878	2.29673	2.80951	3.20616	1.68548	1.91544	2.69218	3.31586	1.36453	2.18092	2.24927	2.81966	2.21752	1.8869	1.6713	2.79696	2.04101	3.08654	1.89453	1.34968	2.54342	2.18655	2.35673	1.43317	1.97387	2.47233	2.57475	1.68915	1.47986	2.98141	2.32295	3.58583	1.96902	1.11976	3.08326	2.67168	3.6929	0.993117	1.74687	2.03789	3.54575	1.45008	1.34787	2.13998
Cell_0173	AMPKARt2	Glucose 17 mM + Glutamine 2.500000e-01 mM + Insulin 10000 ng/ml + EAA 1.000000e-01 X	0.516061	0.482323	0.564947	0.645458	0.663216	0.650798	0.535929	0.568479	0.408348	0.483484	0.550827	0.603651	0.66084	0.679181	0.650546	0.619336	0.691077	0.611402	0.676754	0.461153	0.624629	0.581513	0.542657	0.506865	0.477789	0.543674	0.56219	0.702823	0.515491	0.561737	0.733443	0.554925	0.67517	0.598666	0.504573	0.651409	0.671431	0.39866	0.606228	0.709755	0.457958	0.60313	0.67063	0.512272	0.746231	0.581182	0.670342
Cell_0174	TFEB_TR	Glucose 17 mM + Glutamine 2.500000e-01 mM + Insulin 10000 ng/ml + EAA 1.000000e-01 X	2.07099	1.92081	1.86342	0.596822	1.95985	1.41835	0.941471	2.14538	1.25994	1.95985	2.40776	1.25248	0.970512	2.15969	2.48215	1.54753	1.11834	1.33017	2.14791	1.85363	1.73349	1.65833	0.559579	2.19053	3.48902	1.60266	1.77996	1.11144	1.89937	1.65585	1.98215	0.480457	2.65456	1.74229	1.98779	1.07767	0.58933	3.13376	1.24196	2.88352	1.76735	1.60941	1.66436	1.40133	1.0164	0.971461	2.19508
Cell_0174	FOXO_TR	Glucose 17 mM + Glutamine 2.500000e-01 mM + Insulin 10000 ng/ml + EAA 1.000000e-01 X	2.1115	2.2681	1.06505	1.45232	2.34961	2.74054	3.23495	1.69657	1.90997	2.66883	3.31248	1.34259	2.1995	2.29459	2.64088	2.18972	1.90135	1.64356	2.76564	1.9167	3.14995	1.84175	1.34509	2.36872	2.09506	2.53718	1.37579	1.85585	2.4491	2.52892	1.71412	1.50644	2.93828	2.38031	3.56727	1.97154	1.05842	3.22577	2.67356	3.63976	1.01157	1.67771	2.03602	3.56211	1.86858	1.41641	2.17458
Cell_0174	AMPKARt2	Glucose 17 mM + Glutamine 2.500000e-01 mM + Insulin 10000 ng/ml + EAA 1.000000e-01 X	0.514742	0.484568	0.564211	0.654026	0.662335	0.668562	0.545968	0.554799	0.408917	0.476237	0.541361	0.598373	0.651148	0.679207	0.662771	0.597319	0.698706	0.616555	0.683915	0.468713	0.618946	0.591721	0.552467	0.505064	0.476174	0.495486	0.568316	0.725277	0.510634	0.559646	0.740039	0.545658	0.6837	0.604227	0.519412	0.651248	0.67361	0.400796	0.610131	0.707313	0.451557	0.613384	0.660506	0.512919	0.738365	0.577928	0.677502
Cell_0175	TFEB_TR	Glucose 17 mM + Glutamine 2.500000e-01 mM + Insulin 10000 ng/ml + EAA 1.000000e-01 X	2.03066	2.0376	1.80596	0.596267	2.04813	1.46617	0.939105	2.19054	1.35156	1.88977	1.95075	1.24595	1.23114	1.74197	2.73952	1.42586	0.984846	1.51647	2.26168	1.88974	1.59537	1.94466	0.572479	2.01191	3.41859	1.61868	1.67313	1.10515	2.00198	1.7653	2.23396	0.489668	2.40335	1.96699	2.0455	1.26046	0.580001	3.30472	1.23476	2.84204	1.83462	1.00439	1.48647	1.3621	1.36014	1.00852	2.03547
Cell_0175	FOXO_TR	Glucose 17 mM + Glutamine 2.500000e-01 mM + Insulin 10000 ng/ml + EAA 1.000000e-01 X	2.12664	2.37258	1.04271	1.44271	2.37599	2.4831	3.29131	1.6828	1.78818	2.65663	3.07551	1.29673	2.18466	2.30233	2.50505	2.13774	1.89941	1.60383	2.72968	1.94662	3.11753	1.80503	1.35077	2.22013	2.12309	2.50867	1.37034	1.78008	2.53908	2.58785	1.7969	1.55579	2.84162	2.51593	3.46724	1.95166	1.0219	3.17725	2.5617	3.76445	1.04273	1.39291	2.00709	3.44527	2.60091	1.51205	2.10515
Cell_0175	AMPKARt2	Glucose 17 mM + Glutamine 2.500000e-01 mM + Insulin 10000 ng/ml + EAA 1.000000e-01 X	0.529743	0.489117	0.566846	0.655082	0.674442	0.675473	0.547867	0.549924	0.388128	0.477826	0.553756	0.621251	0.596612	0.687924	0.65254	0.549464	0.727331	0.607639	0.690649	0.464937	0.601876	0.601297	0.565735	0.506398	0.497385	0.499948	0.565896	0.728991	0.516643	0.5718	0.730827	0.498569	0.69044	0.592061	0.517108	0.649612	0.682904	0.397308	0.601741	0.70759	0.449104	0.697424	0.655963	0.513447	0.705077	0.588013	0.675501
Cell_0176	TFEB_TR	Glucose 17 mM + Glutamine 2.500000e-01 mM + Insulin 10000 ng/ml + EAA 1.000000e-01 X	2.08736	2.06584	1.41238	0.601354	2.03427	1.52198	0.976768	1.95246	1.31109	2.00689	1.87077	1.35186	1.30782	1.63688	2.61742	1.38634	1.2421	1.3438	2.28054	1.87505	1.74674	2.1025	0.58741	1.95516	3.43224	1.61066	1.51012	1.11203	2.00334	1.79158	1.69527	0.479133	1.94968	2.20258	2.23704	1.3647	0.586007	3.62333	1.2117	2.7224	1.88	1.40379	1.61065	1.38458	1.64127	1.17484	2.24401
Cell_0176	FOXO_TR	Glucose 17 mM + Glutamine 2.500000e-01 mM + Insulin 10000 ng/ml + EAA 1.000000e-01 X	2.18098	2.35561	1.02666	1.45635	2.40149	2.42002	3.39515	1.61117	1.66139	2.59555	2.82653	1.60653	2.11889	2.27423	2.48907	2.01613	1.84975	1.57516	2.7559	1.89149	3.17945	1.78532	1.3579	2.21258	2.18618	2.65158	1.41167	1.80935	2.57624	2.64124	1.74763	1.55765	2.79594	2.56808	3.2792	1.85088	1.00941	2.92592	2.43246	3.90784	1.06495	1.41735	2.01502	3.42516	2.92513	1.51499	2.11979
Cell_0176	AMPKARt2	Glucose 17 mM + Glutamine 2.500000e-01 mM + Insulin 10000 ng/ml + EAA 1.000000e-01 X	0.53053	0.498884	0.563156	0.651421	0.690214	0.66543	0.532291	0.550933	0.416329	0.490991	0.565474	0.625299	0.531293	0.680065	0.655118	0.539518	0.743	0.599919	0.673559	0.462881	0.584113	0.604834	0.57053	0.504004	0.488447	0.536961	0.564273	0.705472	0.529154	0.569462	0.726118	0.45073	0.685308	0.590263	0.511391	0.67011	0.684801	0.396789	0.583874	0.69281	0.447769	0.711491	0.66535	0.525592	0.674808	0.580289	0.671931
Cell_0177	TFEB_TR	Glucose 17 mM + Glutamine 2.500000e-01 mM + Insulin 10000 ng/ml + EAA 1.000000e-01 X	2.15673	2.00149	1.21963	0.607664	1.89435	1.59921	1.0342	1.90233	0.766488	2.18411	1.99972	1.53256	1.50133	1.65486	2.43843	1.49813	1.43865	1.1298	2.12667	1.72246	1.79254	1.89283	0.59298	1.91693	3.48316	1.72065	1.34611	1.2402	1.88316	1.71491	1.63713	0.461	2.1822	2.10097	2.56382	1.17209	0.606589	3.60902	1.18236	2.71681	1.88313	1.41265	1.60466	1.46886	1.29965	1.31146	2.5879
Cell_0177	FOXO_TR	Glucose 17 mM + Glutamine 2.500000e-01 mM + Insulin 10000 ng/ml + EAA 1.000000e-01 X	2.22712	2.30847	1.02577	1.46631	2.43273	2.57628	3.51694	1.63038	1.96385	2.54237	2.92761	2.1665	2.06531	2.2453	2.46604	1.92327	1.7748	1.57592	2.79069	1.77366	3.18422	1.7744	1.35157	2.13734	2.08793	2.81363	1.36726	1.85794	2.5208	2.61747	1.77181	1.50963	2.80315	2.54604	3.22659	1.73947	1.04428	2.8328	2.36336	3.93328	1.06816	1.38767	2.00424	3.49684	2.74423	1.4644	2.10375
Cell_0177	AMPKARt2	Glucose 17 mM + Glutamine 2.500000e-01 mM + Insulin 10000 ng/ml + EAA 1.000000e-01 X	0.523053	0.494155	0.568934	0.665383	0.694694	0.656045	0.516095	0.551822	0.5807	0.493383	0.576667	0.546091	0.500685	0.667086	0.671918	0.560011	0.737847	0.602146	0.657686	0.462742	0.576788	0.61207	0.569832	0.5081	0.464838	0.549882	0.569529	0.686904	0.536339	0.567771	0.745686	0.443301	0.680248	0.598518	0.514413	0.694375	0.671193	0.411118	0.576222	0.693062	0.452834	0.724423	0.674028	0.549176	0.663551	0.567661	0.680483
Cell_0178	TFEB_TR	Glucose 17 mM + Glutamine 2.500000e-01 mM + Insulin 10000 ng/ml + EAA 1.000000e-01 X	2.07555	1.99109	1.30267	0.613825	1.75431	1.72565	1.11347	2.22147	0.823456	2.25942	2.0884	1.6127	1.71935	1.32054	2.65616	1.43263	1.48	1.21716	2.19492	1.74394	1.61277	1.70798	0.582335	1.80379	3.37319	1.83106	1.30362	1.42341	1.85335	1.75863	3.14347	0.453981	2.51616	1.88853	2.42145	1.14179	0.625488	3.44933	1.1589	2.9926	1.89964	1.25926	1.54715	1.51403	1.04866	1.3539	2.2904
Cell_0178	FOXO_TR	Glucose 17 mM + Glutamine 2.500000e-01 mM + Insulin 10000 ng/ml + EAA 1.000000e-01 X	2.22623	2.30146	1.02664	1.45542	2.39987	2.59083	3.61286	1.65009	1.95556	2.52477	3.01999	2.44227	2.021	2.17143	2.43719	1.87616	1.75204	1.61885	2.76981	1.79383	3.02542	1.75237	1.34811	1.99299	1.93184	2.85755	1.31613	1.87205	2.52178	2.66859	2.33224	1.45529	2.7596	2.49617	3.16114	1.77933	1.0933	2.93477	2.27714	3.892	1.09182	1.36275	1.96653	3.39866	2.65646	1.46926	1.94684
Cell_0178	AMPKARt2	Glucose 17 mM + Glutamine 2.500000e-01 mM + Insulin 10000 ng/ml + EAA 1.000000e-01 X	0.51786	0.480743	0.58433	0.678341	0.689898	0.671965	0.51705	0.546688	0.60003	0.49007	0.58671	0.499381	0.508177	0.661791	0.665306	0.557637	0.74669	0.613805	0.66482	0.461083	0.581347	0.614971	0.575265	0.517567	0.46481	0.540779	0.573721	0.701022	0.529233	0.584713	0.758799	0.458621	0.687354	0.593239	0.516222	0.691243	0.69686	0.422018	0.575519	0.707187	0.453102	0.719332	0.672712	0.567699	0.675395	0.574929	0.689891
Cell_0179	TFEB_TR	Glucose 17 mM + Glutamine 2.500000e-01 mM + Insulin 10000 ng/ml + EAA 1.000000e-01 X	2.01037	2.0215	1.37131	0.624584	1.82039	1.70207	1.18885	2.24215	1.00918	2.30359	2.04755	1.58936	1.57517	1.30604	2.72358	1.23742	1.42316	1.32483	2.34881	1.80396	1.61075	1.66058	0.5721	1.7486	3.25535	1.71603	1.46766	0.938871	1.91245	1.89512	4.31577	0.45455	2.47473	1.80046	2.01012	1.18199	0.617677	3.47013	1.16706	3.34619	1.88856	1.22896	1.64256	1.59401	1.22193	1.56302	1.86501
Cell_0179	FOXO_TR	Glucose 17 mM + Glutamine 2.500000e-01 mM + Insulin 10000 ng/ml + EAA 1.000000e-01 X	2.2363	2.28545	1.04156	1.45479	2.34936	2.51178	3.71685	1.54928	1.93304	2.46124	2.88744	2.41458	1.979	2.08383	2.55565	1.80935	1.8253	1.68186	2.78895	1.81857	2.98018	1.71337	1.36055	1.96752	1.91199	2.89264	1.33543	1.15391	2.605	2.78804	3.07896	1.40084	2.74459	2.47563	2.99087	1.83793	1.08645	3.04949	2.20256	3.75503	1.10286	1.36994	1.95578	3.24304	2.75739	1.509	1.84781
Cell_0179	AMPKARt2	Glucose 17 mM + Glutamine 2.500000e-01 mM + Insulin 10000 ng/ml + EAA 1.000000e-01 X	0.503884	0.486061	0.585699	0.660214	0.680071	0.685704	0.520061	0.541001	0.598656	0.492422	0.592385	0.573217	0.528655	0.654735	0.65174	0.547718	0.757849	0.612527	0.673489	0.462269	0.587091	0.605507	0.576742	0.517674	0.469541	0.532862	0.57508	0.672231	0.524098	0.59411	0.727554	0.470542	0.691748	0.595059	0.513776	0.682678	0.729412	0.411632	0.567723	0.700165	0.440324	0.720856	0.672391	0.567509	0.686136	0.584886	0.689236
Cell_0180	TFEB_TR	Glucose 17 mM + Glutamine 2.500000e-01 mM + Insulin 10000 ng/ml + EAA 1.000000e-01 X	2.09504	1.99436	1.27994	0.628493	2.02317	1.65185	1.24327	2.0316	1.02931	2.40804	2.24639	1.5843	1.5029	1.63875	2.64973	1.14614	1.22198	1.18259	2.3709	1.71432	1.74662	1.44957	0.573428	1.79782	3.21671	1.66154	1.54472	1.01173	2.00147	2.00958	4.32101	0.457279	2.30602	1.84878	2.10274	1.0893	0.612312	3.5913	1.19561	3.09556	1.82202	1.25677	1.5935	1.73	1.31566	1.75067	1.96
Cell_0180	FOXO_TR	Glucose 17 mM + Glutamine 2.500000e-01 mM + Insulin 10000 ng/ml + EAA 1.000000e-01 X	2.23754	2.32362	1.05358	1.44971	2.38254	2.58556	3.7226	1.48652	1.90006	2.37929	2.93245	2.36825	1.96674	2.05247	2.74971	1.77618	1.81923	1.67803	2.80138	1.76361	3.12284	1.66095	1.3669	2.05646	1.90573	2.93429	1.31109	1.17514	2.6616	2.82623	3.34292	1.35715	2.82473	2.5632	3.01164	1.71961	1.0684	3.03222	2.21341	3.6569	1.08178	1.35113	1.95649	3.33169	2.75751	1.54266	1.94791
Cell_0180	AMPKARt2	Glucose 17 mM + Glutamine 2.500000e-01 mM + Insulin 10000 ng/ml + EAA 1.000000e-01 X	0.498313	0.501721	0.565625	0.642624	0.670645	0.666643	0.508349	0.538606	0.591089	0.492852	0.61252	0.633663	0.547139	0.652014	0.654315	0.55489	0.750428	0.583457	0.667631	0.463119	0.58387	0.607802	0.566376	0.513173	0.467146	0.525553	0.578437	0.673185	0.53196	0.584035	0.686852	0.482823	0.679946	0.610152	0.519209	0.688798	0.661826	0.403424	0.552159	0.685609	0.443309	0.735203	0.681753	0.558531	0.676593	0.586496	0.687588
Cell_0181	TFEB_TR	Glucose 17 mM + Glutamine 2.500000e-01 mM + Insulin 10000 ng/ml + EAA 1.000000e-01 X	2.1363	1.94087	1.2938	0.616944	2.11939	1.70217	1.29756	2.1907	0.946503	2.35423	2.71542	1.59236	1.69302	1.7155	2.76635	1.15495	1.06132	1.15925	2.34797	1.64419	1.68611	1.41097	0.576912	1.81099	3.10876	1.84568	1.38546	0.93967	2.02901	2.24039	4.45854	0.459831	2.30201	1.95525	2.13172	1.20163	0.64352	3.81759	1.21831	2.69489	1.76631	1.43015	1.44091	1.73599	1.22526	1.71316	0.987631
Cell_0181	FOXO_TR	Glucose 17 mM + Glutamine 2.500000e-01 mM + Insulin 10000 ng/ml + EAA 1.000000e-01 X	2.16099	2.37449	1.0407	1.42256	2.44659	2.67012	3.52501	1.50851	1.86568	2.35069	3.14919	2.31003	1.93124	2.03307	2.78117	1.85778	1.72645	1.60459	2.73153	1.75909	3.21274	1.65895	1.36268	2.13591	1.83225	2.99828	1.3115	1.22715	2.62184	2.81474	3.27509	1.32272	2.84355	2.64394	3.08618	1.6054	1.08534	2.8853	2.25398	3.72162	1.0891	1.39805	1.9263	3.51446	2.69921	1.61399	1.56382
Cell_0181	AMPKARt2	Glucose 17 mM + Glutamine 2.500000e-01 mM + Insulin 10000 ng/ml + EAA 1.000000e-01 X	0.521995	0.50137	0.544371	0.657903	0.67184	0.652383	0.496381	0.530404	0.596391	0.494349	0.635416	0.606737	0.5613	0.662319	0.653617	0.567084	0.756523	0.555599	0.654611	0.457948	0.571567	0.624757	0.560902	0.514728	0.470614	0.523769	0.582593	0.683444	0.533601	0.585515	0.694228	0.488984	0.669642	0.614731	0.532579	0.688973	0.570131	0.41113	0.541029	0.69242	0.465245	0.728132	0.693955	0.556304	0.66733	0.58133	0.608946
Cell_0182	TFEB_TR	Glucose 17 mM + Glutamine 2.500000e-01 mM + Insulin 10000 ng/ml + EAA 1.000000e-01 X	2.04914	1.92138	1.3969	0.616177	2.09634	1.59706	1.35618	2.4985	0.98419	2.07134	2.70259	1.52978	1.69467	1.57993	2.93465	1.19074	1.12179	1.45243	2.21624	1.6793	1.6468	1.68389	0.574389	1.69751	3.02355	1.9678	1.29281	0.894704	1.87417	2.45647	4.58703	0.477639	2.4774	2.03537	1.80467	1.35044	0.693732	4.30803	1.24619	3.18706	1.68329	1.70342	1.51411	1.64161	1.09339	1.6883	1.09699
Cell_0182	FOXO_TR	Glucose 17 mM + Glutamine 2.500000e-01 mM + Insulin 10000 ng/ml + EAA 1.000000e-01 X	2.07572	2.28732	1.03434	1.43464	2.49056	2.64453	3.39519	1.48062	1.84705	2.34687	3.1404	2.23897	1.86187	2.00632	2.69238	1.94442	1.97409	1.56385	2.69263	1.81071	3.16957	1.74107	1.35821	2.06849	1.8415	3.09028	1.43742	1.24543	2.5524	2.85325	3.26431	1.28027	2.78307	2.63998	2.99797	1.63624	1.09064	2.87534	2.26679	3.74786	1.07579	1.57171	1.88683	3.47532	2.72311	1.71558	1.58693
Cell_0182	AMPKARt2	Glucose 17 mM + Glutamine 2.500000e-01 mM + Insulin 10000 ng/ml + EAA 1.000000e-01 X	0.546451	0.493807	0.548264	0.653907	0.684301	0.667742	0.493985	0.530202	0.59999	0.501638	0.627778	0.5838	0.568098	0.675607	0.651668	0.580033	0.767333	0.552536	0.647749	0.455065	0.564605	0.63121	0.570098	0.516647	0.470789	0.530539	0.587239	0.69505	0.527261	0.604347	0.722873	0.480601	0.674354	0.620275	0.537699	0.683966	0.574076	0.414473	0.541431	0.700462	0.466352	0.72929	0.702298	0.554504	0.665565	0.572804	0.625451
Cell_0183	TFEB_TR	Glucose 17 mM + Glutamine 2.500000e-01 mM + Insulin 10000 ng/ml + EAA 1.000000e-01 X	2.01123	1.96001	1.38262	0.627193	2.03047	1.46573	1.42938	2.47076	0.972566	1.96205	2.47413	1.43127	1.59759	0.662334	3.05418	1.24676	1.35487	1.57281	2.06545	1.77679	1.84494	1.7096	0.575263	1.52584	3.04365	1.94986	1.33187	1.01412	1.75224	2.42519	3.7971	0.510865	2.5676	2.07141	1.98778	1.18216	0.758059	4.58233	1.26537	3.53404	1.53889	1.62293	1.59879	1.6276	1.02641	1.70343	1.03206
Cell_0183	FOXO_TR	Glucose 17 mM + Glutamine 2.500000e-01 mM + Insulin 10000 ng/ml + EAA 1.000000e-01 X	2.0655	2.20555	1.06026	1.47675	2.53004	2.6518	3.53845	1.41436	1.84888	2.36098	2.97086	2.25398	1.85645	2.03636	2.70739	1.94089	2.57707	1.53215	2.6904	1.86684	3.12062	1.80048	1.35397	1.8666	1.90803	3.0821	1.45709	1.22928	2.55562	2.91733	3.24901	1.25617	2.76278	2.72086	3.06857	1.76038	1.08611	3.10885	2.22975	3.65637	1.00741	1.60788	1.86871	3.30038	2.75642	1.74857	1.56977
Cell_0183	AMPKARt2	Glucose 17 mM + Glutamine 2.500000e-01 mM + Insulin 10000 ng/ml + EAA 1.000000e-01 X	0.543039	0.492273	0.56347	0.587644	0.693127	0.676494	0.494971	0.560938	0.595018	0.498746	0.615299	0.583718	0.580696	0.73078	0.661773	0.588542	0.720392	0.55459	0.650911	0.458892	0.568493	0.634742	0.578219	0.517041	0.458403	0.531316	0.593899	0.690345	0.531596	0.610049	0.722278	0.473695	0.677538	0.631713	0.537259	0.693002	0.580516	0.406596	0.544288	0.689679	0.45178	0.756103	0.707824	0.544393	0.657369	0.578859	0.624305
Cell_0184	TFEB_TR	Glucose 17 mM + Glutamine 2.500000e-01 mM + Insulin 10000 ng/ml + EAA 1.000000e-01 X	2.04787	2.01316	1.48475	0.612922	1.9311	1.53766	1.54264	2.17766	0.890669	2.08116	2.77659	1.42804	1.64599	0.665334	3.06947	1.33151	1.42083	1.30548	2.11302	1.87022	1.90497	1.59266	0.590968	1.4424	3.02955	1.95244	1.31743	1.22592	1.89384	2.4544	2.80456	0.52629	2.51084	2.08281	2.19536	1.06465	0.846951	4.38392	1.25291	2.92	1.43648	1.32474	1.44091	1.69543	1.19012	1.73987	0.999488
Cell_0184	FOXO_TR	Glucose 17 mM + Glutamine 2.500000e-01 mM + Insulin 10000 ng/ml + EAA 1.000000e-01 X	2.07828	2.25773	1.05842	1.43589	2.5159	2.66681	3.72199	1.36015	1.85342	2.39025	2.89664	2.31755	1.88739	1.98312	2.76986	1.94379	2.9159	1.43493	2.66842	1.9065	3.1261	1.81388	1.36759	1.82291	1.9208	3.01348	1.31345	1.2561	2.59377	2.92356	3.17242	1.25674	2.72638	2.83054	3.26484	2.07012	1.09399	3.24677	2.16855	3.58643	0.999746	1.45222	1.8471	3.31071	2.77608	1.71199	1.48609
Cell_0184	AMPKARt2	Glucose 17 mM + Glutamine 2.500000e-01 mM + Insulin 10000 ng/ml + EAA 1.000000e-01 X	0.532048	0.489718	0.558946	0.521298	0.687027	0.663977	0.505576	0.595499	0.603348	0.482401	0.626968	0.563218	0.605217	0.742695	0.669385	0.585722	0.648886	0.5418	0.650822	0.457625	0.561731	0.643339	0.565319	0.518659	0.45217	0.532853	0.599738	0.680018	0.54187	0.607236	0.707519	0.476766	0.675852	0.6214	0.540697	0.683398	0.531372	0.398266	0.544301	0.684841	0.453429	0.737693	0.714161	0.535463	0.648268	0.587857	0.618593
Cell_0185	TFEB_TR	Glucose 17 mM + Glutamine 2.500000e-01 mM + Insulin 10000 ng/ml + EAA 1.000000e-01 X	2.00342	1.95933	1.68227	0.601518	1.932	1.55668	1.62468	2.00393	0.918608	2.06029	2.72909	1.49247	1.63063	0.681954	2.93634	1.35923	1.25067	1.1754	2.13583	1.84177	1.72643	1.68108	0.605944	1.49383	3.01991	1.97366	1.30626	1.37896	2.03307	2.74872	2.64951	0.537742	0.897115	2.12735	1.78068	1.19564	0.916624	4.21107	1.25848	2.79576	1.38135	1.25221	1.31852	1.82628	1.3849	1.87607	1.04429
Cell_0185	FOXO_TR	Glucose 17 mM + Glutamine 2.500000e-01 mM + Insulin 10000 ng/ml + EAA 1.000000e-01 X	2.0747	2.25185	1.0528	1.34089	2.5016	2.61944	3.75318	1.31544	1.87101	2.37291	2.8909	2.30575	1.86776	1.99524	2.71493	1.95208	2.84257	1.36299	2.69087	1.87457	3.1274	1.81222	1.37874	2.00773	1.94961	3.03839	1.28348	1.28803	2.61819	2.84456	3.13553	1.25752	2.30505	2.76982	3.25645	2.48342	1.07363	3.15736	2.16664	3.52931	0.989049	1.44197	1.80799	3.51525	2.86959	1.7079	1.38427
Cell_0185	AMPKARt2	Glucose 17 mM + Glutamine 2.500000e-01 mM + Insulin 10000 ng/ml + EAA 1.000000e-01 X	0.536249	0.491127	0.55759	0.508715	0.676055	0.653599	0.518022	0.597271	0.61847	0.472862	0.627925	0.544927	0.615299	0.737629	0.673506	0.591935	0.648643	0.524952	0.640101	0.45439	0.54825	0.639159	0.517996	0.513249	0.456837	0.547637	0.603686	0.681366	0.546566	0.621526	0.700376	0.478095	0.702092	0.602743	0.530384	0.613595	0.523158	0.399618	0.545056	0.695511	0.45654	0.682041	0.718546	0.533673	0.640666	0.579441	0.622628
Cell_0186	TFEB_TR	Glucose 17 mM + Glutamine 2.500000e-01 mM + Insulin 10000 ng/ml + EAA 1.000000e-01 X	1.91755	1.8593	1.71501	0.660514	2.06443	1.54034	1.58192	2.06638	0.947668	2.01301	2.06485	1.48444	1.55691	0.690899	2.71307	1.30285	1.38985	1.46256	1.99497	1.71212	1.76478	1.70839	0.604709	1.57855	3.09091	2.00629	1.38729	1.29331	1.9795	2.93259	3.17398	0.570694	0.946467	2.1197	1.89358	1.27108	0.931317	4.05894	1.3046	3.32125	1.29502	1.21947	1.41162	1.96337	1.40874	1.87775	0.974264
Cell_0186	FOXO_TR	Glucose 17 mM + Glutamine 2.500000e-01 mM + Insulin 10000 ng/ml + EAA 1.000000e-01 X	2.10256	2.17288	1.35244	1.3236	2.61193	2.64162	3.69818	1.31408	1.9039	2.31236	2.86456	2.18088	1.85173	2.00214	2.67924	1.88849	2.777	1.36903	2.6775	1.79999	3.13722	1.76168	1.32313	2.13131	2.01088	3.06671	1.34627	1.25519	2.66437	2.7202	3.14605	1.26746	2.22894	2.70728	3.25512	2.65187	1.03286	3.15733	2.2162	3.46989	0.907496	1.561	1.84215	3.6069	2.91901	1.7721	1.34358
Cell_0186	AMPKARt2	Glucose 17 mM + Glutamine 2.500000e-01 mM + Insulin 10000 ng/ml + EAA 1.000000e-01 X	0.54387	0.4979	0.560844	0.511958	0.675985	0.656103	0.50961	0.583481	0.617491	0.475092	0.609242	0.543523	0.614703	0.731423	0.681387	0.615187	0.699644	0.519344	0.630316	0.462027	0.556587	0.638348	0.444969	0.500889	0.447614	0.553556	0.605579	0.680688	0.547491	0.637298	0.695288	0.476613	0.69509	0.607197	0.516915	0.530912	0.544365	0.408288	0.539044	0.690337	0.451701	0.670828	0.712036	0.526278	0.63163	0.581776	0.63186
Cell_0187	TFEB_TR	Glucose 17 mM + Glutamine 2.500000e-01 mM + Insulin 10000 ng/ml + EAA 1.000000e-01 X	1.93598	1.90688	1.80532	0.764109	2.11138	1.6982	1.50501	2.04993	0.87627	2.08766	2.21051	1.48295	1.6766	0.684553	2.46379	1.32602	1.65503	1.58458	1.97416	1.60526	1.96915	1.68098	0.611852	1.63098	3.13434	2.0643	1.44025	1.01588	2.00248	2.8064	3.61506	0.585314	0.88091	1.92862	2.49765	1.22074	0.943887	3.85627	1.33063	3.24754	1.23939	1.18804	1.47857	1.98158	1.47924	1.6841	0.899677
Cell_0187	FOXO_TR	Glucose 17 mM + Glutamine 2.500000e-01 mM + Insulin 10000 ng/ml + EAA 1.000000e-01 X	2.15424	2.18981	2.0963	1.33332	2.73631	2.72774	3.64823	1.31786	1.89594	2.26386	2.77887	2.06138	1.85933	2.02925	2.76399	1.85996	2.79821	1.35638	2.54166	1.77039	3.18947	1.90794	1.22478	2.17278	2.03596	3.01336	1.31978	1.23006	2.66716	2.6081	3.17636	1.26549	2.28952	2.73792	3.36386	2.56675	1.02057	3.23983	2.25476	3.49035	0.945923	1.53691	1.99147	3.55902	2.77779	1.86164	1.35846
Cell_0187	AMPKARt2	Glucose 17 mM + Glutamine 2.500000e-01 mM + Insulin 10000 ng/ml + EAA 1.000000e-01 X	0.544754	0.49894	0.502369	0.501148	0.678763	0.6643	0.497431	0.586774	0.61504	0.47944	0.610873	0.532339	0.629971	0.734912	0.676303	0.622795	0.718	0.516822	0.632265	0.466463	0.573637	0.662767	0.389883	0.494196	0.433116	0.541342	0.60473	0.6792	0.541014	0.638088	0.694981	0.485008	0.707423	0.618145	0.539012	0.507007	0.525117	0.402288	0.524841	0.670563	0.458573	0.684854	0.701932	0.508106	0.635125	0.596738	0.631714
Cell_0188	TFEB_TR	Glucose 17 mM + Glutamine 2.500000e-01 mM + Insulin 10000 ng/ml + EAA 1.000000e-01 X	1.98005	1.99848	1.97674	0.843945	2.15562	1.75382	1.5288	1.90817	0.885782	1.96898	2.97699	1.57666	1.85095	0.684298	2.48665	1.38998	1.31257	1.23892	2.10407	1.56279	1.91461	1.80275	0.650401	1.67854	3.13135	2.03884	1.38426	0.888711	2.13018	2.64115	3.44607	0.576387	0.813822	1.88269	2.29964	1.09963	0.982651	3.87659	1.31806	2.86554	1.26648	1.2739	1.44664	1.98065	1.58898	1.58036	0.944707
Cell_0188	FOXO_TR	Glucose 17 mM + Glutamine 2.500000e-01 mM + Insulin 10000 ng/ml + EAA 1.000000e-01 X	2.1874	2.21405	2.77786	1.2614	2.78866	2.75382	3.6629	1.31699	1.85677	2.23842	2.68752	2.05136	1.82223	2.09939	2.76984	1.92014	2.74168	1.3269	2.4871	1.78313	3.1726	2.44133	1.15538	2.28145	2.03715	2.98733	1.29378	1.25856	2.58243	2.55917	3.2111	1.22596	2.34595	2.67946	3.26605	2.47968	1.00684	3.08337	2.26115	3.50878	0.955753	1.48299	2.07944	3.59139	2.64548	1.8904	1.36709
Cell_0188	AMPKARt2	Glucose 17 mM + Glutamine 2.500000e-01 mM + Insulin 10000 ng/ml + EAA 1.000000e-01 X	0.547066	0.50485	0.403547	0.494502	0.670498	0.66945	0.505318	0.602183	0.617903	0.484139	0.627503	0.519908	0.640023	0.743303	0.662077	0.602942	0.70539	0.508059	0.645822	0.457549	0.580389	0.667645	0.368922	0.497158	0.441719	0.537005	0.60556	0.691839	0.530383	0.643085	0.698264	0.499415	0.713899	0.616489	0.567043	0.518367	0.507056	0.389136	0.523063	0.667958	0.468354	0.681396	0.700075	0.49857	0.648791	0.584673	0.620153
Cell_0189	TFEB_TR	Glucose 17 mM + Glutamine 2.500000e-01 mM + Insulin 10000 ng/ml + EAA 1.000000e-01 X	1.94523	1.94225	2.03601	0.911547	2.44143	1.62468	1.58258	1.96692	0.985101	1.77591	2.8167	1.56548	1.67818	0.688446	2.74399	1.36406	0.892001	1.1768	1.21673	1.57035	1.83117	1.90953	0.71685	1.72187	3.12403	1.93104	1.34941	1.0073	2.08318	2.65799	3.06312	0.578046	0.935118	2.14291	2.04786	0.943515	0.986791	3.76617	1.28925	2.7686	1.31318	1.22322	1.5048	2.09233	1.48447	1.64644	0.919399
Cell_0189	FOXO_TR	Glucose 17 mM + Glutamine 2.500000e-01 mM + Insulin 10000 ng/ml + EAA 1.000000e-01 X	2.22725	2.14575	2.9497	1.18784	2.90013	2.7597	3.70534	1.36707	1.88695	2.24088	2.7683	2.07612	1.75315	2.13259	2.67306	1.94375	2.67698	1.33011	2.44221	1.79253	3.08398	2.96047	1.11015	2.35841	1.99294	3.00367	1.32695	1.2589	2.56648	2.56821	3.22365	1.19122	2.29951	2.65423	2.98846	2.411	0.959821	2.86238	2.2096	3.39657	0.846655	1.55143	2.00144	3.62296	2.68027	1.80759	1.35121
Cell_0189	AMPKARt2	Glucose 17 mM + Glutamine 2.500000e-01 mM + Insulin 10000 ng/ml + EAA 1.000000e-01 X	0.54772	0.518108	0.363017	0.494848	0.666595	0.670107	0.51256	0.602366	0.598606	0.488237	0.627562	0.536618	0.635851	0.754017	0.667868	0.589339	0.699802	0.502778	0.526919	0.453614	0.580881	0.603878	0.350939	0.50969	0.447614	0.546886	0.610626	0.691794	0.535436	0.651341	0.693044	0.501191	0.709053	0.614661	0.562279	0.514553	0.520324	0.401962	0.536306	0.670341	0.476147	0.685541	0.695346	0.506857	0.653916	0.569772	0.61436
Cell_0190	TFEB_TR	Glucose 17 mM + Glutamine 2.500000e-01 mM + Insulin 10000 ng/ml + EAA 1.000000e-01 X	1.92992	1.8932	2.20788	0.999428	2.64975	1.69335	1.55095	2.08419	1.03078	1.8405	1.88164	1.40896	1.20728	0.68542	2.65579	1.41343	1.06186	1.59107	1.27171	1.58261	1.97001	1.96111	0.808474	1.72419	3.08361	1.9301	1.3741	1.14405	1.92655	2.71065	3.18978	0.574358	1.05312	2.2151	2.61968	0.928167	0.963277	3.52063	1.23957	2.64424	1.42977	1.27298	1.53337	2.18735	1.22027	1.78503	0.841892
Cell_0190	FOXO_TR	Glucose 17 mM + Glutamine 2.500000e-01 mM + Insulin 10000 ng/ml + EAA 1.000000e-01 X	2.27126	2.10711	2.92009	1.18456	3.00119	2.75608	3.66825	1.32551	1.97768	2.26371	2.93909	2.11249	1.71894	2.12821	2.62454	1.90004	2.6839	1.29107	2.74882	1.79125	3.0967	3.17666	1.08956	2.34606	1.87515	3.00192	1.36065	1.22822	2.64219	2.57727	3.20695	1.16716	2.27083	2.79834	2.84456	2.31632	0.930179	2.92191	2.1506	3.27377	1.38524	1.596	1.92071	3.54712	2.69575	1.66396	1.31992
Cell_0190	AMPKARt2	Glucose 17 mM + Glutamine 2.500000e-01 mM + Insulin 10000 ng/ml + EAA 1.000000e-01 X	0.53902	0.521072	0.374863	0.490731	0.675847	0.667432	0.505606	0.598974	0.561917	0.493214	0.614584	0.569164	0.650138	0.750694	0.685334	0.596976	0.696	0.505595	0.400664	0.459409	0.566312	0.513963	0.352749	0.522959	0.432	0.553071	0.616259	0.672721	0.552969	0.641835	0.680975	0.492115	0.713408	0.618472	0.558648	0.513576	0.539404	0.420685	0.538045	0.663739	0.499767	0.697304	0.690174	0.512872	0.654945	0.594214	0.61373
Cell_0191	TFEB_TR	Glucose 17 mM + Glutamine 2.500000e-01 mM + Insulin 10000 ng/ml + EAA 1.000000e-01 X	1.96499	1.98327	2.38443	1.0877	2.49716	1.88829	1.48891	2.01233	1.16594	1.84701	1.8377	1.3799	1.0233	0.692532	2.44414	1.45532	1.31385	1.58906	1.13366	1.57073	2.05347	2.02424	0.893438	1.67583	3.04827	1.99041	1.32538	1.26502	1.87747	2.51204	3.36945	0.570443	0.900037	2.10263	2.88276	1.0384	0.993898	0.624832	1.2029	2.51119	1.69913	1.57064	1.38733	2.2047	1.08879	1.81372	0.878181
Cell_0191	FOXO_TR	Glucose 17 mM + Glutamine 2.500000e-01 mM + Insulin 10000 ng/ml + EAA 1.000000e-01 X	2.27218	2.14778	3.0281	1.17737	2.98674	2.70724	3.58379	1.27638	1.99664	2.25158	2.87511	2.2404	1.76644	2.12446	2.56761	1.8488	2.70552	1.22527	2.44762	1.79858	3.16372	3.20397	1.11857	2.29167	1.78261	2.98261	1.39385	1.24489	2.63139	2.56801	3.15158	1.12028	2.30296	2.84396	2.947	2.26648	0.942627	1.10218	2.15784	3.31897	2.63047	1.55525	1.93604	3.56397	2.60913	1.50171	1.28012
Cell_0191	AMPKARt2	Glucose 17 mM + Glutamine 2.500000e-01 mM + Insulin 10000 ng/ml + EAA 1.000000e-01 X	0.53143	0.523237	0.380797	0.485737	0.670975	0.663554	0.501008	0.625048	0.541671	0.499074	0.599206	0.579687	0.668186	0.734135	0.687888	0.600382	0.685706	0.517432	0.474704	0.462787	0.556581	0.487442	0.409644	0.51718	0.429796	0.552678	0.618657	0.679619	0.561947	0.627457	0.675254	0.487133	0.71636	0.621266	0.561281	0.535073	0.550121	0.474248	0.52674	0.675864	0.509764	0.697623	0.701325	0.5054	0.662745	0.623204	0.60631
Cell_0192	TFEB_TR	Glucose 17 mM + Glutamine 2.500000e-01 mM + Insulin 10000 ng/ml + EAA 1.000000e-01 X	1.9506	2.04134	2.18739	1.15666	2.39475	1.82806	1.4683	2.10081	1.36819	1.69499	3.17178	1.48372	1.26083	0.718971	2.63225	1.23758	1.40834	1.1538	1.08012	1.55462	2.13272	2.01765	0.913146	1.61286	3.04579	1.88898	1.30244	1.3348	1.89619	2.17453	3.30856	0.583757	0.759541	2.1463	2.46718	1.15127	1.06086	0.613338	1.22008	2.67811	1.96222	1.46759	1.41647	2.25226	1.25637	1.61352	0.880076
Cell_0192	FOXO_TR	Glucose 17 mM + Glutamine 2.500000e-01 mM + Insulin 10000 ng/ml + EAA 1.000000e-01 X	2.23042	2.16569	3.08128	1.1529	3.06554	2.69698	3.53551	1.7007	1.90278	2.19198	2.62601	2.3426	1.83157	2.1738	2.50164	1.80184	2.72228	1.26017	2.2034	1.8094	3.10562	3.0925	1.13502	2.1866	1.78591	2.94347	1.3477	1.2652	2.57996	2.55024	3.08627	1.07155	2.33971	2.71168	3.0948	2.24433	0.956244	1.04652	2.15498	3.46857	3.27738	1.52615	1.97394	3.69993	2.56786	1.40502	1.27363
Cell_0192	AMPKARt2	Glucose 17 mM + Glutamine 2.500000e-01 mM + Insulin 10000 ng/ml + EAA 1.000000e-01 X	0.531305	0.532789	0.374537	0.480799	0.649504	0.668465	0.500113	0.639616	0.537612	0.492893	0.587525	0.566754	0.658505	0.745235	0.683871	0.592934	0.680254	0.543741	0.551873	0.46233	0.579538	0.527197	0.469729	0.504345	0.441137	0.550384	0.619176	0.69844	0.567265	0.622984	0.68192	0.485725	0.706203	0.624722	0.544239	0.562955	0.531321	0.497609	0.530445	0.69687	0.475045	0.696427	0.708584	0.497877	0.670456	0.62595	0.606137
Cell_0193	TFEB_TR	Glucose 17 mM + Glutamine 2.500000e-01 mM + Insulin 10000 ng/ml + EAA 1.000000e-01 X	1.91801	2.00929	1.86806	1.20015	0.470104	1.72418	1.4494	2.34499	1.33254	1.78318	3.82881	1.48817	1.31135	0.748778	2.66873	1.12259	1.52637	1.06128	1.12246	1.54794	2.27685	1.92312	0.867482	1.58187	3.00537	1.8148	1.44842	1.17414	1.85888	2.1015	3.75319	0.576739	0.90958	2.02662	2.41148	1.28775	1.10462	0.619276	1.23642	2.96377	2.04883	1.24359	1.69523	2.28634	1.4589	1.41188	0.813107
Cell_0193	FOXO_TR	Glucose 17 mM + Glutamine 2.500000e-01 mM + Insulin 10000 ng/ml + EAA 1.000000e-01 X	2.15524	2.09962	3.01192	1.15438	1.2366	2.69333	3.54086	2.41274	1.7794	2.1615	2.51571	2.29062	1.77568	2.29397	2.519	1.77217	2.7535	1.33112	2.30507	1.80175	2.98838	3.02965	1.07648	2.13236	1.81352	2.93198	1.28612	1.2114	2.629	2.54622	3.0735	1.04992	2.40408	2.6392	3.07224	2.20181	0.966165	1.06201	2.11431	3.48703	3.03205	1.52388	2.01371	3.70228	2.6144	1.45219	1.32734
Cell_0193	AMPKARt2	Glucose 17 mM + Glutamine 2.500000e-01 mM + Insulin 10000 ng/ml + EAA 1.000000e-01 X	0.533388	0.531286	0.353709	0.470591	0.354709	0.678799	0.498717	0.595919	0.53343	0.479126	0.585148	0.557283	0.652246	0.76643	0.683282	0.598538	0.67833	0.566305	0.529807	0.462461	0.593632	0.551543	0.484001	0.511017	0.441104	0.540897	0.624572	0.683566	0.572077	0.617159	0.68734	0.484728	0.703275	0.630922	0.539347	0.59426	0.503489	0.494231	0.544152	0.690702	0.445312	0.68869	0.701545	0.500443	0.666558	0.624149	0.614572
Cell_0194	TFEB_TR	Glucose 17 mM + Glutamine 2.500000e-01 mM + Insulin 10000 ng/ml + EAA 1.000000e-01 X	1.92463	1.98583	1.85097	1.21765	0.466861	1.86042	1.42575	2.18577	1.21166	1.91424	2.69767	1.43578	1.08171	0.768221	2.33212	1.34842	1.42142	1.31378	1.05472	1.56675	2.1374	1.7908	0.806738	1.58869	2.93411	1.99901	1.59292	0.972694	1.78802	2.241	3.84118	0.565206	1.02574	1.79084	2.79877	1.23166	1.1561	0.629108	1.21297	3.12615	2.02756	1.67099	1.72477	2.25763	1.40974	1.3142	0.867841
Cell_0194	FOXO_TR	Glucose 17 mM + Glutamine 2.500000e-01 mM + Insulin 10000 ng/ml + EAA 1.000000e-01 X	2.09081	2.01423	3.06854	1.1554	1.25192	2.61649	3.62175	2.70757	1.68136	2.19536	2.56872	2.2378	1.70051	2.33811	2.50461	1.77651	2.81037	1.33291	2.32296	1.78894	2.94267	3.10939	0.996796	2.16255	1.79159	2.97517	1.55025	1.14343	2.64639	2.58246	3.08152	1.06201	2.45574	2.71668	3.06367	2.1976	1.00473	1.08919	2.14537	3.28705	2.83013	1.49808	2.06196	3.58411	2.65498	1.45445	1.36239
Cell_0194	AMPKARt2	Glucose 17 mM + Glutamine 2.500000e-01 mM + Insulin 10000 ng/ml + EAA 1.000000e-01 X	0.539596	0.518764	0.341095	0.468797	0.368972	0.677245	0.506798	0.555656	0.533181	0.482121	0.583914	0.557417	0.670649	0.729901	0.679235	0.611365	0.667439	0.563433	0.533413	0.466289	0.580876	0.545835	0.478509	0.51694	0.443848	0.532564	0.627813	0.67117	0.562914	0.618296	0.675252	0.48789	0.710889	0.630897	0.555292	0.619878	0.515252	0.497321	0.541366	0.678687	0.459451	0.670179	0.707933	0.506996	0.652179	0.621803	0.60573
Cell_0195	TFEB_TR	Glucose 17 mM + Glutamine 2.500000e-01 mM + Insulin 10000 ng/ml + EAA 1.000000e-01 X	1.89554	1.92899	2.19637	1.25345	0.467863	1.85499	1.4891	1.94319	1.24858	1.76586	1.88121	1.45296	1.11028	0.772964	2.361	1.43205	1.1515	1.53434	1.04162	1.57169	1.91425	1.7462	0.758743	0.931185	2.89178	2.09012	1.63986	0.921546	1.84478	2.23107	2.71473	0.594484	0.900856	1.9477	2.91004	0.924212	1.22495	0.630005	1.19984	3.34878	1.95773	2.03084	1.47371	2.29523	1.35129	1.24596	0.931974
Cell_0195	FOXO_TR	Glucose 17 mM + Glutamine 2.500000e-01 mM + Insulin 10000 ng/ml + EAA 1.000000e-01 X	2.12292	1.99862	3.24678	1.168	1.27281	2.6308	3.65466	2.69416	1.61102	2.22224	2.65072	2.25332	1.75056	2.31237	2.43143	1.7967	2.87641	1.35626	2.32371	1.75309	2.91443	3.07936	0.956842	1.39176	1.76193	2.97967	2.0791	1.11645	2.52429	2.56409	3.05698	1.0913	2.42327	2.89207	3.14762	2.22366	1.05715	1.09417	2.19617	3.10654	2.76779	1.44911	2.07965	3.5703	2.62209	1.44523	1.30085
Cell_0195	AMPKARt2	Glucose 17 mM + Glutamine 2.500000e-01 mM + Insulin 10000 ng/ml + EAA 1.000000e-01 X	0.543006	0.508581	0.36494	0.484702	0.36858	0.671554	0.51794	0.56599	0.534605	0.499595	0.579407	0.556223	0.678352	0.669689	0.682662	0.605675	0.655783	0.550887	0.552242	0.468284	0.587212	0.558921	0.470962	0.723037	0.449567	0.54326	0.609892	0.687677	0.55643	0.631336	0.662556	0.495997	0.707695	0.619032	0.550879	0.61658	0.522517	0.513786	0.539853	0.680893	0.477189	0.657017	0.715998	0.506531	0.647547	0.614893	0.584265
Cell_0196	TFEB_TR	Glucose 17 mM + Glutamine 2.500000e-01 mM + Insulin 10000 ng/ml + EAA 1.000000e-01 X	1.83097	1.82122	2.45612	1.31901	0.468362	1.56621	1.6761	2.25522	1.32597	1.7032	2.22614	1.44485	1.2987	0.794159	2.65513	1.27646	1.19747	1.53826	1.14077	1.50336	2.04089	1.88403	0.729732	0.913334	2.84115	1.91147	1.72098	0.859661	1.9694	2.11411	2.52126	0.614604	0.829035	2.10254	2.69893	0.937169	1.24413	0.623999	1.18894	3.5694	1.80804	1.67086	1.36117	2.35451	1.43271	1.47167	0.900105
Cell_0196	FOXO_TR	Glucose 17 mM + Glutamine 2.500000e-01 mM + Insulin 10000 ng/ml + EAA 1.000000e-01 X	2.20489	1.99205	3.3297	1.21574	1.27668	2.75834	3.49147	2.84361	1.5751	2.20543	2.71925	2.20572	1.75186	2.40003	2.42654	1.80223	2.87418	1.41049	2.43585	1.66697	2.85998	3.05712	0.939991	1.39479	1.79783	2.92626	2.34738	1.08891	2.42344	2.44543	3.02452	1.12588	2.42296	3.01374	3.0368	2.2063	1.07372	1.09868	2.12348	3.10869	2.49002	1.4441	2.10019	3.544	2.57573	1.87088	1.21053
Cell_0196	AMPKARt2	Glucose 17 mM + Glutamine 2.500000e-01 mM + Insulin 10000 ng/ml + EAA 1.000000e-01 X	0.52935	0.5022	0.365304	0.491485	0.38148	0.677711	0.518207	0.576639	0.520939	0.509455	0.573344	0.552309	0.671195	0.660052	0.696974	0.592868	0.657413	0.550982	0.53536	0.464983	0.604076	0.576225	0.471673	0.729471	0.438824	0.560857	0.582632	0.685653	0.569417	0.626818	0.673175	0.507142	0.698732	0.606702	0.534689	0.601791	0.485917	0.50748	0.558465	0.67327	0.474585	0.644456	0.702116	0.501197	0.662784	0.611489	0.574664
Cell_0197	TFEB_TR	Glucose 17 mM + Glutamine 2.500000e-01 mM + Insulin 10000 ng/ml + EAA 1.000000e-01 X	1.83038	1.77031	2.18564	1.32771	0.470408	1.50388	1.86305	2.54171	1.48269	1.83398	2.29116	1.39211	1.26412	0.88989	2.53502	1.267	1.4936	1.36488	1.1292	1.46429	2.26048	2.1037	0.712213	0.926467	2.74656	1.8807	1.78124	0.915255	1.92112	2.18085	3.72192	0.597948	0.919533	1.89959	2.62391	1.31886	1.22017	0.6208	1.12408	3.32318	1.64984	1.33296	3.03666	2.283	1.51758	1.86894	0.947468
Cell_0197	FOXO_TR	Glucose 17 mM + Glutamine 2.500000e-01 mM + Insulin 10000 ng/ml + EAA 1.000000e-01 X	2.22756	1.90695	3.26047	1.21899	1.2648	2.75036	3.34714	2.99121	1.55448	2.20281	2.68799	2.17194	1.77872	2.47329	2.43132	1.77473	2.81166	1.41577	2.42105	1.62892	2.84496	3.20536	0.922849	1.44385	1.85915	2.87542	2.2626	1.07092	2.46457	2.45174	2.96546	1.20448	2.51223	2.94046	2.87398	2.15424	1.05825	1.09522	2.01271	3.05588	2.24441	1.48987	1.95866	3.33472	2.66045	2.50138	1.17641
Cell_0197	AMPKARt2	Glucose 17 mM + Glutamine 2.500000e-01 mM + Insulin 10000 ng/ml + EAA 1.000000e-01 X	0.513244	0.499027	0.321015	0.485657	0.397704	0.684264	0.516568	0.5623	0.502103	0.505924	0.569239	0.545523	0.684292	0.668736	0.695962	0.585863	0.657482	0.558804	0.528383	0.472722	0.598664	0.574197	0.49322	0.735344	0.429229	0.56998	0.576939	0.667662	0.578258	0.609855	0.685396	0.517143	0.701471	0.60857	0.528573	0.603142	0.477543	0.489932	0.563534	0.660662	0.474987	0.632345	0.516569	0.503693	0.672167	0.589142	0.575639
Cell_0198	TFEB_TR	Glucose 17 mM + Glutamine 2.500000e-01 mM + Insulin 10000 ng/ml + EAA 1.000000e-01 X	1.88871	1.77316	1.98767	1.2578	0.480837	1.69324	1.91972	2.28033	1.6273	1.81311	2.07778	1.42731	1.18176	1.04519	2.3039	1.30468	1.47387	1.40905	1.08844	1.5198	2.15443	2.28298	0.690304	0.9648	2.64219	2.05088	1.61091	1.19725	1.83126	2.41484	3.72636	0.587085	1.00504	1.91258	2.8444	1.33607	1.21142	0.625731	1.05446	2.78173	1.57051	1.45852	2.38311	2.20045	1.73097	1.74914	1.03106
Cell_0198	FOXO_TR	Glucose 17 mM + Glutamine 2.500000e-01 mM + Insulin 10000 ng/ml + EAA 1.000000e-01 X	2.21762	1.85079	3.17878	1.16673	1.27628	2.65797	3.41246	2.88097	1.52935	2.23018	2.59698	2.27796	2.21939	2.37091	2.40932	1.73025	2.80585	1.42933	2.28999	1.68257	2.87151	3.22306	0.915752	1.49948	1.86569	2.81385	2.18911	1.09678	2.55345	2.61965	2.91003	1.26258	2.5344	2.83486	2.94523	2.05945	1.05835	1.08404	2.01665	2.88706	2.16951	1.49599	1.94503	3.22532	2.8503	2.64966	1.16119
Cell_0198	AMPKARt2	Glucose 17 mM + Glutamine 2.500000e-01 mM + Insulin 10000 ng/ml + EAA 1.000000e-01 X	0.515857	0.498101	0.31681	0.505979	0.388552	0.681644	0.521514	0.544131	0.507128	0.499936	0.576609	0.534941	0.701406	0.654611	0.679258	0.572722	0.646846	0.560375	0.533987	0.485668	0.592949	0.579911	0.506547	0.737158	0.432926	0.582739	0.586433	0.678347	0.573354	0.607108	0.676776	0.527453	0.700282	0.620431	0.523838	0.605234	0.515924	0.500274	0.543832	0.66267	0.477456	0.638473	0.532228	0.509257	0.657541	0.546392	0.578664
Cell_0199	TFEB_TR	Glucose 17 mM + Glutamine 2.500000e-01 mM + Insulin 10000 ng/ml + EAA 1.000000e-01 X	1.93053	1.74948	2.30739	1.20925	0.48505	1.69502	1.88093	2.11341	1.42458	1.3582	2.10073	1.50585	1.14718	1.18892	2.43636	1.22897	1.17694	1.67206	1.15408	1.54401	1.80108	2.2321	0.673605	1.01888	2.55882	2.07332	1.37299	1.27666	1.87173	2.47051	2.85774	0.571328	1.07161	2.13043	3.12546	1.01115	1.19168	0.627222	1.05653	2.62299	1.56128	1.62444	2.62501	2.18356	1.96414	1.34597	1.03988
Cell_0199	FOXO_TR	Glucose 17 mM + Glutamine 2.500000e-01 mM + Insulin 10000 ng/ml + EAA 1.000000e-01 X	2.21992	1.8946	3.25186	1.15654	1.29001	2.69862	3.45163	2.69193	1.52458	1.67588	2.62338	2.39471	2.80031	2.29833	2.45812	1.70867	2.82711	1.42607	2.17765	1.70325	2.89878	3.19347	0.920851	1.49078	1.83099	2.73876	2.20574	1.11756	2.55609	2.63208	2.98456	1.24087	2.44795	2.86252	3.04289	1.96479	1.06647	1.08002	2.08132	2.93555	2.12345	1.46951	2.08281	3.32706	2.9072	2.5389	1.13213
Cell_0199	AMPKARt2	Glucose 17 mM + Glutamine 2.500000e-01 mM + Insulin 10000 ng/ml + EAA 1.000000e-01 X	0.523961	0.500839	0.349624	0.542193	0.378974	0.680649	0.524527	0.527381	0.527866	0.695958	0.581317	0.531732	0.673842	0.644526	0.672133	0.566912	0.646353	0.559322	0.537786	0.476938	0.595241	0.582952	0.503994	0.742448	0.430101	0.599185	0.586822	0.694244	0.568884	0.602256	0.673863	0.540559	0.675752	0.622574	0.532291	0.597719	0.522208	0.524568	0.53073	0.662548	0.466869	0.649744	0.518108	0.503427	0.644454	0.538838	0.582505
Cell_0200	TFEB_TR	Glucose 17 mM + Glutamine 2.500000e-01 mM + Insulin 10000 ng/ml + EAA 1.000000e-01 X	1.90283	1.70055	2.49604	1.21527	0.471316	1.57563	1.82101	2.30913	1.13946	1.41853	1.9502	1.52121	1.05205	1.33785	2.54046	1.26861	1.30232	1.71835	1.13821	1.54589	1.8921	1.90096	0.67222	1.01785	2.50448	2.03534	1.41316	1.03946	1.87734	2.20368	2.96664	0.555109	1.1289	1.97718	3.25925	1.05293	1.15507	0.620665	1.10281	2.8111	1.59878	1.55201	3.20956	2.12447	1.88176	1.40687	1.12475
Cell_0200	FOXO_TR	Glucose 17 mM + Glutamine 2.500000e-01 mM + Insulin 10000 ng/ml + EAA 1.000000e-01 X	2.21171	1.90338	3.35172	1.18657	1.25427	2.7591	3.35252	2.67596	1.53247	1.73839	2.59659	2.44458	2.92422	2.33369	2.54285	1.71398	2.77576	1.3628	2.04216	1.70739	2.94025	3.36017	0.922333	1.46414	1.7843	2.70302	2.1758	1.1075	2.48061	2.52059	3.0162	1.41268	2.36006	2.89991	3.06712	2.04531	1.04647	1.07793	2.09586	3.12303	2.14935	1.48816	2.19914	3.31402	2.76238	2.6367	1.11462
Cell_0200	AMPKARt2	Glucose 17 mM + Glutamine 2.500000e-01 mM + Insulin 10000 ng/ml + EAA 1.000000e-01 X	0.52262	0.505859	0.347531	0.555322	0.389248	0.684041	0.518358	0.522176	0.534974	0.714348	0.570324	0.538703	0.6078	0.643648	0.672612	0.578547	0.655604	0.567071	0.553182	0.465572	0.589515	0.563956	0.513471	0.750821	0.425143	0.610322	0.581517	0.68617	0.563911	0.594855	0.679214	0.54188	0.641642	0.613091	0.5483	0.593918	0.49738	0.526822	0.523195	0.65416	0.457003	0.647919	0.525451	0.494151	0.654372	0.565448	0.581033
Cell_0201	TFEB_TR	Glucose 17 mM + Glutamine 2.500000e-01 mM + Insulin 10000 ng/ml + EAA 1.000000e-01 X	1.83099	1.65851	2.38707	1.20452	0.462704	1.56475	1.77954	2.35277	1.23059	1.32244	1.78129	1.57095	1.11457	1.51794	2.32954	1.33888	1.66738	1.59655	1.06419	1.63099	2.54617	1.80737	0.668299	0.936033	2.45151	2.05427	1.55002	0.916977	1.20444	1.96437	3.11378	0.59849	1.18203	1.77912	3.22957	1.404	1.15922	0.617352	1.14366	2.79952	1.64274	1.45297	3.60895	2.06404	1.75113	1.60049	1.267
Cell_0201	FOXO_TR	Glucose 17 mM + Glutamine 2.500000e-01 mM + Insulin 10000 ng/ml + EAA 1.000000e-01 X	2.1891	1.84824	3.22138	1.19683	1.21699	2.71252	3.33718	2.78177	1.52452	1.69151	2.31218	2.46251	2.77169	2.25296	2.60803	1.71198	2.70719	1.35936	1.96469	1.80945	2.98752	3.40313	0.922113	1.48643	1.73897	2.73512	2.15068	1.09572	1.83337	2.56612	2.78842	1.88356	2.29375	2.88932	3.0502	2.24452	1.01324	1.06831	2.06555	3.0408	2.20757	1.50355	2.30872	3.19727	2.65837	2.66291	1.08806
Cell_0201	AMPKARt2	Glucose 17 mM + Glutamine 2.500000e-01 mM + Insulin 10000 ng/ml + EAA 1.000000e-01 X	0.524239	0.505431	0.334848	0.562661	0.39232	0.682041	0.507541	0.528314	0.529947	0.702468	0.569652	0.535619	0.558544	0.637555	0.672062	0.574033	0.656235	0.57142	0.55605	0.471843	0.589054	0.559181	0.528512	0.746837	0.431823	0.618535	0.579207	0.68567	0.653935	0.605153	0.657914	0.52895	0.615018	0.610756	0.538728	0.588115	0.504443	0.515411	0.513402	0.65758	0.457878	0.643055	0.502043	0.496204	0.663669	0.561588	0.574898
Cell_0202	TFEB_TR	Glucose 17 mM + Glutamine 2.500000e-01 mM + Insulin 10000 ng/ml + EAA 1.000000e-01 X	1.85743	1.63224	2.06749	1.14404	0.469196	1.60854	1.83862	2.15174	1.46215	1.26545	2.05185	1.67693	1.44544	1.631	2.11156	1.24234	1.46746	1.46405	1.15883	1.71225	2.59347	2.19469	0.655421	0.906347	2.38779	1.86822	1.50471	1.04141	1.40696	2.00033	2.74478	0.679509	1.32098	1.95239	3.02109	1.51507	1.17032	0.619997	1.17035	2.71169	1.63537	1.52398	3.49087	2.01194	1.82006	1.58054	1.26522
Cell_0202	FOXO_TR	Glucose 17 mM + Glutamine 2.500000e-01 mM + Insulin 10000 ng/ml + EAA 1.000000e-01 X	2.13302	1.82427	3.0427	1.18661	1.23239	2.67837	3.42282	2.75996	1.52111	1.68145	2.11262	2.38132	2.76024	2.04102	2.6591	1.7352	2.64845	1.33779	2.02239	1.89877	3.01472	3.24109	0.920183	1.50055	1.74956	2.7838	2.15476	1.07351	1.87209	2.58157	2.63952	2.17805	2.20673	2.91924	2.84367	2.30268	0.992611	1.06255	2.01531	2.86312	2.15805	1.46084	2.3369	3.1701	2.73343	2.48015	1.04714
Cell_0202	AMPKARt2	Glucose 17 mM + Glutamine 2.500000e-01 mM + Insulin 10000 ng/ml + EAA 1.000000e-01 X	0.533281	0.506306	0.352296	0.57624	0.376428	0.675857	0.50183	0.514542	0.52491	0.699531	0.583208	0.521785	0.565205	0.636173	0.674899	0.553374	0.660792	0.568239	0.537272	0.470037	0.596731	0.575112	0.544183	0.736609	0.434163	0.610826	0.573557	0.701021	0.658631	0.614426	0.635393	0.525803	0.59583	0.613578	0.524241	0.575152	0.525052	0.519309	0.520497	0.672115	0.457213	0.6415	0.418675	0.511128	0.650274	0.530363	0.574852
Cell_0203	TFEB_TR	Glucose 17 mM + Glutamine 2.500000e-01 mM + Insulin 10000 ng/ml + EAA 1.000000e-01 X	1.95762	1.60489	1.51545	1.08559	0.473508	1.67997	1.93312	2.04649	1.45252	1.33048	2.54145	1.69308	1.7617	1.64992	2.0659	1.26014	1.16392	1.30526	1.30852	1.7171	2.0893	2.41456	0.64452	0.999547	2.3677	1.68307	1.45272	1.15942	1.59801	2.13207	2.81248	0.737188	1.40994	2.03991	2.72001	1.43314	1.15263	0.621771	1.17847	2.88344	1.57082	1.51662	2.63279	1.91603	1.77569	1.78332	1.14976
Cell_0203	FOXO_TR	Glucose 17 mM + Glutamine 2.500000e-01 mM + Insulin 10000 ng/ml + EAA 1.000000e-01 X	2.03624	1.777	3.08309	1.17098	1.25398	2.69923	3.42095	2.64791	1.5265	1.73815	2.18731	2.24583	2.7899	1.91538	2.63608	1.84669	2.56498	1.31291	2.03369	1.87127	3.01208	3.20128	0.90784	1.47648	1.80407	2.77655	2.11276	1.0457	1.89827	2.40191	2.77018	2.08228	2.08844	2.97586	2.64326	2.23922	0.982632	1.07843	1.96199	2.92685	2.08334	1.40719	2.09198	3.13164	2.83246	2.41276	1.04248
Cell_0203	AMPKARt2	Glucose 17 mM + Glutamine 2.500000e-01 mM + Insulin 10000 ng/ml + EAA 1.000000e-01 X	0.535551	0.515649	0.388058	0.574559	0.375028	0.677273	0.500355	0.489535	0.522123	0.711548	0.58757	0.527727	0.608116	0.638324	0.677486	0.558041	0.680942	0.581484	0.526615	0.463012	0.591772	0.580207	0.560215	0.740869	0.427175	0.587119	0.564644	0.700393	0.675444	0.614469	0.651783	0.533956	0.581465	0.609084	0.533431	0.570786	0.523061	0.531981	0.533423	0.676267	0.45547	0.642535	0.396076	0.533726	0.635157	0.521473	0.577009
Cell_0204	TFEB_TR	Glucose 17 mM + Glutamine 2.500000e-01 mM + Insulin 10000 ng/ml + EAA 1.000000e-01 X	1.90112	1.54993	1.60154	1.07521	0.481187	1.69277	1.87495	2.24821	1.31352	1.41838	2.62969	1.67145	1.8342	1.68764	2.22391	1.39875	1.50365	1.38008	1.42904	1.69961	2.33641	2.14337	0.643927	1.09211	2.3936	1.90657	1.41295	1.12964	1.56418	2.22591	2.83809	0.762526	1.35965	1.85024	2.68266	1.40705	1.18199	0.61269	1.1852	2.78687	1.51591	1.39096	1.98848	1.91656	1.64638	1.93001	1.0799
Cell_0204	FOXO_TR	Glucose 17 mM + Glutamine 2.500000e-01 mM + Insulin 10000 ng/ml + EAA 1.000000e-01 X	1.97459	1.66365	3.14858	1.19337	1.25196	2.69358	3.35618	2.71537	1.52358	1.73223	2.21393	2.23269	2.82024	1.89182	2.5692	1.94849	2.54324	1.73837	1.93473	1.84209	2.97006	3.27531	0.905664	1.46535	1.81509	2.78798	2.08975	1.04638	1.91515	2.34581	2.80501	1.98832	2.01198	2.97934	2.72556	2.20347	0.963767	1.09382	1.95581	3.00709	2.10531	1.34531	1.92193	3.12918	2.84907	2.45165	1.05519
Cell_0204	AMPKARt2	Glucose 17 mM + Glutamine 2.500000e-01 mM + Insulin 10000 ng/ml + EAA 1.000000e-01 X	0.530886	0.520038	0.438873	0.570207	0.402315	0.683648	0.496865	0.493662	0.525023	0.710156	0.586017	0.550969	0.637467	0.63786	0.680696	0.578078	0.696516	0.584104	0.522068	0.471359	0.582523	0.577865	0.549263	0.753688	0.4257	0.578278	0.560169	0.691158	0.6807	0.615505	0.669393	0.534047	0.570429	0.606258	0.545489	0.576403	0.530771	0.529607	0.529582	0.663449	0.462116	0.643034	0.445359	0.545616	0.639842	0.532118	0.570608
Cell_0205	TFEB_TR	Glucose 17 mM + Glutamine 2.500000e-01 mM + Insulin 10000 ng/ml + EAA 1.000000e-01 X	1.77352	1.48229	2.2479	1.06442	0.493802	1.60409	1.76058	2.62475	1.26524	1.49051	2.22059	1.69167	1.66403	1.769	1.47188	1.33718	1.84672	1.65197	1.66345	1.6486	2.62117	1.91525	0.656841	1.06368	2.41432	2.10548	1.31277	1.04392	1.60691	2.20049	2.20143	0.746105	1.43917	1.76887	2.96358	1.3334	1.27519	0.586679	1.18853	2.20679	1.54303	1.47714	2.16276	1.98749	1.8522	1.60926	1.12958
Cell_0205	FOXO_TR	Glucose 17 mM + Glutamine 2.500000e-01 mM + Insulin 10000 ng/ml + EAA 1.000000e-01 X	1.97817	1.58567	3.10172	1.24489	1.25089	2.66441	3.36204	2.85945	1.51059	1.75451	2.19529	2.30913	2.98318	1.83055	2.64721	1.94265	2.59539	2.5117	1.88663	1.8421	2.94784	3.35704	0.899857	1.4666	1.79389	2.89707	2.09557	1.04253	1.91674	2.44571	2.69016	2.06394	2.05361	2.90122	2.85497	2.18698	0.972163	1.07604	1.96256	2.95649	2.19058	1.25746	2.0555	3.22852	2.84067	2.37834	1.05397
Cell_0205	AMPKARt2	Glucose 17 mM + Glutamine 2.500000e-01 mM + Insulin 10000 ng/ml + EAA 1.000000e-01 X	0.529187	0.515659	0.475319	0.57417	0.411902	0.681668	0.492807	0.510999	0.523837	0.706647	0.582294	0.557839	0.644845	0.64499	0.59226	0.577685	0.696959	0.533593	0.515621	0.476254	0.584304	0.574263	0.530946	0.752088	0.427733	0.581198	0.560212	0.696252	0.674732	0.611074	0.661309	0.525148	0.56718	0.604985	0.554884	0.578576	0.559892	0.516314	0.524397	0.654463	0.465219	0.636045	0.465518	0.535647	0.651652	0.535054	0.566626
Cell_0206	TFEB_TR	Glucose 17 mM + Glutamine 2.500000e-01 mM + Insulin 10000 ng/ml + EAA 1.000000e-01 X	1.82129	1.43686	2.21491	1.01406	0.488348	1.66211	1.79248	2.75113	1.26585	1.49867	1.87171	1.62885	1.47867	1.86736	1.38641	1.39216	1.56219	1.71564	1.92055	1.57542	2.02314	2.026	0.668957	0.998535	2.41739	1.98861	1.44175	1.06779	1.90901	2.02562	1.66079	0.705122	1.57452	1.83062	3.06366	1.25722	1.36772	0.559151	1.1391	2.08721	1.59881	1.53897	2.26669	1.9125	2.2398	1.52359	1.24556
Cell_0206	FOXO_TR	Glucose 17 mM + Glutamine 2.500000e-01 mM + Insulin 10000 ng/ml + EAA 1.000000e-01 X	2.00913	1.55518	3.10704	1.20753	1.254	2.64955	3.38875	2.80138	1.4776	1.90624	2.27467	2.33807	3.01126	1.77515	2.57376	1.96876	2.59169	2.91793	1.87218	1.79756	2.97851	3.47006	0.873375	1.4675	1.79386	2.95328	2.0368	1.01767	1.9088	2.39803	2.66036	2.09234	2.11653	2.81829	2.86948	2.23659	1.18516	1.04308	1.89996	2.93481	2.26778	1.20145	2.09565	3.19014	2.84456	2.27741	1.08278
Cell_0206	AMPKARt2	Glucose 17 mM + Glutamine 2.500000e-01 mM + Insulin 10000 ng/ml + EAA 1.000000e-01 X	0.529643	0.514921	0.44828	0.571519	0.376164	0.677094	0.487467	0.503833	0.516344	0.705235	0.583754	0.554802	0.648016	0.65388	0.588223	0.5667	0.696504	0.484242	0.520663	0.47492	0.582809	0.563468	0.538626	0.732317	0.427058	0.572035	0.559299	0.701243	0.67506	0.616545	0.662579	0.511043	0.573591	0.597216	0.565174	0.576513	0.578233	0.506437	0.527987	0.663974	0.454887	0.636191	0.458681	0.525363	0.651349	0.52803	0.57303
Cell_0207	TFEB_TR	Glucose 17 mM + Glutamine 2.500000e-01 mM + Insulin 10000 ng/ml + EAA 1.000000e-01 X	1.88712	1.41526	2.01263	1.00898	0.473761	1.83121	1.87531	2.57184	1.26551	1.50125	1.62113	1.56763	1.44308	1.97209	1.39462	1.78197	1.11292	1.63146	2.11774	1.55723	1.7462	2.13899	0.672692	1.02895	2.37066	2.00673	1.69563	1.21184	1.89767	1.99437	1.57885	0.680076	1.49557	1.4056	3.06898	1.30019	1.45237	0.552803	1.0815	2.58479	1.61445	1.2711	2.11929	1.78677	2.25287	1.76335	1.31838
Cell_0207	FOXO_TR	Glucose 17 mM + Glutamine 2.500000e-01 mM + Insulin 10000 ng/ml + EAA 1.000000e-01 X	2.06256	1.51487	3.11344	1.18001	1.24738	2.63871	3.3443	2.69882	1.46195	2.02039	2.19626	2.34231	2.75412	1.77585	2.44116	2.1107	2.5409	2.95342	1.77279	1.7727	2.95077	3.46026	0.894564	1.47197	1.78356	2.87213	2.00537	1.03054	1.91017	2.28091	2.64455	2.02747	2.07424	2.38512	2.93801	2.37666	1.68495	1.01563	1.82935	2.83201	2.33205	1.19243	1.95295	3.08098	2.8516	2.30992	1.12156
Cell_0207	AMPKARt2	Glucose 17 mM + Glutamine 2.500000e-01 mM + Insulin 10000 ng/ml + EAA 1.000000e-01 X	0.52879	0.515318	0.392154	0.573429	0.333024	0.683178	0.484403	0.482411	0.53158	0.694908	0.610134	0.562255	0.639057	0.650601	0.579756	0.565074	0.707033	0.482112	0.528731	0.482156	0.574785	0.559769	0.537951	0.713556	0.427571	0.567484	0.554759	0.700575	0.675985	0.639192	0.682891	0.498105	0.577427	0.653875	0.560735	0.578745	0.582733	0.503132	0.531182	0.670941	0.446304	0.650615	0.462382	0.527974	0.638814	0.526075	0.575191
Cell_0208	TFEB_TR	Glucose 17 mM + Glutamine 2.500000e-01 mM + Insulin 10000 ng/ml + EAA 1.000000e-01 X	1.82388	1.40883	2.37455	1.07967	0.475144	1.82975	1.89369	2.43993	1.28651	1.61428	1.38001	1.67103	1.3048	1.99208	1.44285	1.88105	0.999905	1.60411	2.30839	1.55695	2.08538	1.99549	0.680635	1.06699	2.30171	2.06157	1.61018	1.20248	1.61032	2.05123	1.61493	0.662915	1.50477	1.76663	3.56824	1.28583	1.52906	0.569436	1.10464	2.59075	1.66101	1.14574	2.34729	1.79803	1.94244	1.64816	1.34774
Cell_0208	FOXO_TR	Glucose 17 mM + Glutamine 2.500000e-01 mM + Insulin 10000 ng/ml + EAA 1.000000e-01 X	2.09078	1.49396	2.99678	1.47322	1.22125	2.6412	3.30253	2.78112	1.47754	2.03961	2.04193	2.39021	2.61021	1.70584	2.41659	2.24541	2.53957	3.05235	1.67637	1.81703	2.82389	3.25288	0.899058	1.43563	1.76416	2.82859	2.03301	1.05357	1.90358	2.26017	2.63106	1.99951	1.96582	2.51035	3.04985	2.42876	2.16188	0.987861	1.82122	2.64775	2.38212	1.19224	1.93716	3.16927	2.82263	2.39566	1.11264
Cell_0208	AMPKARt2	Glucose 17 mM + Glutamine 2.500000e-01 mM + Insulin 10000 ng/ml + EAA 1.000000e-01 X	0.52072	0.506532	0.371147	0.585922	0.307262	0.690169	0.493913	0.476567	0.569882	0.695957	0.629338	0.56624	0.619706	0.647729	0.592767	0.570843	0.725774	0.481567	0.525831	0.482463	0.575393	0.57067	0.528247	0.706916	0.429999	0.580446	0.547704	0.705792	0.675753	0.652519	0.697654	0.50334	0.589779	0.682777	0.556073	0.580519	0.581679	0.508562	0.531694	0.65921	0.444035	0.647248	0.475548	0.531145	0.631293	0.536061	0.575792
Cell_0209	TFEB_TR	Glucose 17 mM + Glutamine 2.500000e-01 mM + Insulin 10000 ng/ml + EAA 1.000000e-01 X	0.546937	1.42399	2.48332	1.12775	0.494781	1.77686	1.92004	2.32961	1.24917	1.67534	1.55727	1.74297	1.02342	1.95332	1.38323	1.53842	1.16474	1.56908	2.366	1.52808	2.09107	1.86792	0.695388	1.06621	2.32189	1.91894	1.42669	0.9317	1.67785	1.79257	1.6167	0.653214	1.67989	1.61391	3.9368	1.21774	1.56641	0.598125	1.15128	2.04185	1.71721	1.46911	2.55809	1.86551	1.76321	1.55566	1.33184
Cell_0209	FOXO_TR	Glucose 17 mM + Glutamine 2.500000e-01 mM + Insulin 10000 ng/ml + EAA 1.000000e-01 X	1.36086	1.51441	2.94697	2.04374	1.19888	2.68055	3.31626	2.82329	1.44116	2.09039	2.17343	2.48859	2.66452	1.61081	2.51728	2.31264	2.56031	3.13351	1.67006	1.84149	2.72968	3.11021	0.84503	1.34969	1.78248	2.90852	1.97941	1.04491	1.85693	2.24718	2.67171	2.00945	1.83572	2.58672	3.08802	2.34908	2.28267	0.976224	1.82189	2.71034	2.3142	1.19392	2.04841	3.25097	2.76858	2.372	1.10334
Cell_0209	AMPKARt2	Glucose 17 mM + Glutamine 2.500000e-01 mM + Insulin 10000 ng/ml + EAA 1.000000e-01 X	0.691969	0.498083	0.367109	0.590084	0.28599	0.684413	0.505102	0.494279	0.594773	0.708615	0.604416	0.561579	0.615846	0.657949	0.597381	0.576053	0.737242	0.474591	0.52308	0.47526	0.578082	0.586867	0.548134	0.699698	0.433366	0.58221	0.535226	0.704099	0.681799	0.653018	0.698422	0.514003	0.634612	0.687549	0.564655	0.559042	0.579916	0.508509	0.526592	0.650028	0.436776	0.625762	0.499386	0.532945	0.637525	0.538115	0.585839
Cell_0210	TFEB_TR	Glucose 17 mM + Glutamine 2.500000e-01 mM + Insulin 10000 ng/ml + EAA 1.000000e-01 X	0.606213	1.46437	2.3321	1.14553	0.531491	1.77603	1.97091	2.13121	1.23829	1.52576	1.8292	1.69866	0.999765	2.00232	1.32737	1.35347	1.35945	1.48608	2.3442	1.53451	2.00712	2.0954	0.740325	1.18796	2.36699	2.01513	1.4776	0.851702	1.74382	1.60827	1.48886	0.649814	1.57691	1.43532	3.41163	1.21345	1.59921	0.628456	1.15883	1.99672	1.68067	1.76095	2.32365	1.86152	1.69752	1.81094	1.25229
Cell_0210	FOXO_TR	Glucose 17 mM + Glutamine 2.500000e-01 mM + Insulin 10000 ng/ml + EAA 1.000000e-01 X	1.41353	1.55527	3.05982	2.52108	1.21174	2.71854	3.2761	2.65383	1.42233	2.12219	2.33714	2.60403	2.64493	1.65951	2.58346	2.32968	2.50222	3.09218	1.66653	1.83488	2.73986	3.17901	1.19166	1.27174	1.79431	2.99778	1.91221	1.06431	1.79522	2.27148	2.6636	1.97546	1.69012	2.54465	3.09076	2.26262	2.21765	0.985461	1.82838	2.87731	2.13614	1.1571	2.11421	3.14084	2.79744	2.27141	1.12015
Cell_0210	AMPKARt2	Glucose 17 mM + Glutamine 2.500000e-01 mM + Insulin 10000 ng/ml + EAA 1.000000e-01 X	0.633437	0.50235	0.348841	0.586228	0.266364	0.675074	0.498906	0.507315	0.597957	0.697611	0.576575	0.555641	0.622404	0.670243	0.58263	0.571173	0.731125	0.48935	0.525164	0.476527	0.574338	0.599135	0.549266	0.687807	0.438634	0.561324	0.518176	0.694941	0.693584	0.638079	0.69012	0.504426	0.679587	0.682288	0.564832	0.518663	0.588975	0.485823	0.526545	0.660751	0.436886	0.631859	0.510086	0.535726	0.637511	0.528452	0.586993
Cell_0211	TFEB_TR	Glucose 17 mM + Glutamine 2.500000e-01 mM + Insulin 10000 ng/ml + EAA 1.000000e-01 X	0.586614	1.51105	2.34563	1.19187	0.571236	1.71942	1.98157	2.12992	1.40783	1.41207	1.71072	1.715	1.18635	2.03694	1.44475	1.41117	1.52002	1.39973	2.40365	1.1313	2.22854	2.3635	0.849703	1.35008	2.33438	2.21341	1.41075	1.13102	1.43827	1.91492	1.34536	0.626232	1.33941	1.37551	2.94795	1.22179	1.67544	0.652982	1.16068	2.37061	1.63779	1.57781	2.11494	1.82081	1.6464	1.75564	1.29577
Cell_0211	FOXO_TR	Glucose 17 mM + Glutamine 2.500000e-01 mM + Insulin 10000 ng/ml + EAA 1.000000e-01 X	1.53672	1.60761	3.11718	2.72804	1.21832	2.70857	3.16624	2.55226	1.49297	2.0624	2.2332	2.64861	2.6369	1.74326	2.56963	2.35053	2.36297	3.09157	1.62052	2.32303	2.76836	3.27291	2.15155	1.20685	1.76904	3.02649	1.91094	1.06496	1.78067	2.36047	2.68397	1.9343	1.6112	2.42164	3.11496	2.14243	2.28319	0.978983	1.84456	2.77886	2.05435	1.11949	2.08586	3.06556	2.8788	2.21202	1.11911
Cell_0211	AMPKARt2	Glucose 17 mM + Glutamine 2.500000e-01 mM + Insulin 10000 ng/ml + EAA 1.000000e-01 X	0.612533	0.505085	0.344602	0.582342	0.254166	0.673276	0.482979	0.488198	0.589607	0.670424	0.581476	0.541829	0.61152	0.677904	0.588983	0.563227	0.719212	0.499921	0.522326	0.662882	0.572179	0.598388	0.479249	0.6855	0.44659	0.547693	0.514572	0.697602	0.705126	0.607849	0.68154	0.495111	0.682878	0.683251	0.561651	0.513464	0.597317	0.470125	0.548458	0.677853	0.45565	0.662604	0.488162	0.532889	0.622543	0.536039	0.57553
Cell_0212	TFEB_TR	Glucose 17 mM + Glutamine 2.500000e-01 mM + Insulin 10000 ng/ml + EAA 1.000000e-01 X	0.515345	1.53292	2.19808	1.22768	0.606661	1.72933	1.91963	2.28997	1.4759	1.5567	1.69387	1.74263	1.26219	1.91242	1.51919	1.45497	1.65278	1.52418	2.40129	1.07426	2.41803	2.27467	1.00671	1.36479	2.34707	2.02931	1.27576	1.23155	1.47144	2.116	1.48944	0.639079	1.32852	1.32697	3.15086	1.34219	1.7336	0.678406	1.13116	2.3227	1.62557	1.1794	2.15683	1.86118	1.79186	1.43379	1.46964
Cell_0212	FOXO_TR	Glucose 17 mM + Glutamine 2.500000e-01 mM + Insulin 10000 ng/ml + EAA 1.000000e-01 X	1.52754	1.64128	3.02531	2.71887	1.19583	2.68296	3.11256	2.63184	1.41972	2.00807	2.13633	2.59269	2.68593	1.72163	2.5312	2.45455	2.31934	3.08399	1.56868	2.28032	2.74488	3.28186	2.96313	1.13603	1.77619	3.02896	1.87901	1.01207	1.80293	2.34086	2.76876	1.98535	1.62948	2.36041	3.167	2.00559	2.39771	0.957216	1.80146	2.62353	2.05696	1.2751	1.97289	3.06736	2.89459	2.17926	1.1046
Cell_0212	AMPKARt2	Glucose 17 mM + Glutamine 2.500000e-01 mM + Insulin 10000 ng/ml + EAA 1.000000e-01 X	0.612705	0.496672	0.360774	0.581627	0.249582	0.671566	0.476659	0.471884	0.584122	0.661131	0.588771	0.534489	0.58849	0.68475	0.590968	0.571314	0.716596	0.494702	0.518262	0.661888	0.569696	0.598733	0.396908	0.685165	0.454056	0.556964	0.528642	0.701121	0.704214	0.602253	0.679186	0.497477	0.670139	0.679208	0.567499	0.569176	0.603485	0.487787	0.572951	0.68139	0.465393	0.673351	0.463747	0.52542	0.619787	0.550181	0.574292
Cell_0213	TFEB_TR	Glucose 17 mM + Glutamine 2.500000e-01 mM + Insulin 10000 ng/ml + EAA 1.000000e-01 X	0.471977	1.5354	2.34781	1.21688	0.663855	1.81193	1.82717	2.24303	1.31225	1.82675	2.00427	1.72005	1.20206	1.79657	1.39403	1.5367	1.5516	1.87048	2.34805	0.997981	2.44434	2.18944	1.226	1.40673	2.42531	1.84122	1.4781	1.14667	1.85491	1.95508	1.71422	0.72641	1.3444	1.48681	3.23369	1.46339	1.70765	0.710591	0.891011	2.08063	1.55003	1.08322	2.29452	1.92065	1.89214	1.52745	1.42042
Cell_0213	FOXO_TR	Glucose 17 mM + Glutamine 2.500000e-01 mM + Insulin 10000 ng/ml + EAA 1.000000e-01 X	1.3837	1.63761	2.87143	2.61635	1.2027	2.69158	3.10102	2.63187	1.34998	1.97395	2.20407	2.52192	2.63274	1.68415	2.53092	2.51956	2.46669	2.97134	1.50832	2.27998	2.72726	3.27957	3.16609	1.09557	1.81257	3.04355	1.91402	1.04308	1.79365	2.25111	2.72751	2.08038	1.66958	2.40824	3.23087	2.01166	2.37726	0.953678	1.91236	2.6311	1.99989	1.5801	1.857	2.95678	2.90742	2.20186	1.08096
Cell_0213	AMPKARt2	Glucose 17 mM + Glutamine 2.500000e-01 mM + Insulin 10000 ng/ml + EAA 1.000000e-01 X	0.611595	0.498002	0.364004	0.586852	0.250277	0.666261	0.482822	0.488834	0.60475	0.650654	0.575295	0.551642	0.57705	0.687014	0.572355	0.5794	0.720765	0.49428	0.516342	0.667613	0.572771	0.621048	0.362896	0.666003	0.449727	0.568069	0.533978	0.699778	0.689739	0.617654	0.679878	0.480169	0.676638	0.677097	0.561726	0.63398	0.621766	0.4986	0.47693	0.67072	0.455421	0.662947	0.456821	0.51743	0.633987	0.543158	0.577456
Cell_0214	TFEB_TR	Glucose 17 mM + Glutamine 2.500000e-01 mM + Insulin 10000 ng/ml + EAA 1.000000e-01 X	0.472202	1.54771	2.91212	1.18277	0.732151	1.76523	1.83938	2.11086	1.33402	2.07918	2.25873	1.72544	1.02282	1.813	1.33957	1.57086	1.25562	1.98081	2.37208	0.964838	2.34852	2.30369	1.54174	1.51174	2.41512	1.93412	1.59896	1.28702	1.79847	1.93464	1.6816	0.778046	1.28987	1.50798	3.1812	1.38862	1.64006	0.736953	0.82442	2.05742	1.49626	1.21003	2.46919	1.82887	1.66827	1.86257	1.20689
Cell_0214	FOXO_TR	Glucose 17 mM + Glutamine 2.500000e-01 mM + Insulin 10000 ng/ml + EAA 1.000000e-01 X	1.31392	1.63367	2.73087	2.51647	1.23212	2.70953	3.06356	2.54958	1.89637	1.91373	2.269	2.47043	2.61795	1.66318	2.55318	2.41217	2.61046	2.89136	1.44407	2.29324	2.77066	3.29585	3.28464	1.09341	1.81691	3.06397	2.09841	1.07806	1.76784	2.30496	2.63216	2.07983	1.69613	2.44412	3.28809	2.10218	2.26993	0.961245	1.71691	2.60433	2.00309	1.71968	1.79676	2.82348	2.9314	2.35035	1.06824
Cell_0214	AMPKARt2	Glucose 17 mM + Glutamine 2.500000e-01 mM + Insulin 10000 ng/ml + EAA 1.000000e-01 X	0.619577	0.512056	0.364539	0.584942	0.254552	0.67016	0.491302	0.501036	0.621767	0.602894	0.567305	0.569398	0.577536	0.684505	0.579706	0.563442	0.722209	0.48787	0.509549	0.667719	0.591329	0.641775	0.350895	0.641969	0.432329	0.566689	0.523228	0.710806	0.678124	0.609154	0.682888	0.460652	0.693671	0.68011	0.55041	0.65984	0.625607	0.480776	0.470945	0.661726	0.45982	0.662734	0.458521	0.508814	0.635067	0.53972	0.574264
Cell_0215	TFEB_TR	Glucose 17 mM + Glutamine 2.500000e-01 mM + Insulin 10000 ng/ml + EAA 1.000000e-01 X	0.471337	1.55441	2.8021	1.14098	0.774567	0.727387	1.93921	2.17854	1.48146	2.15932	2.24766	1.67135	1.01237	1.83218	1.49305	1.432	1.18093	1.79224	2.39916	0.970624	2.24219	2.19668	1.83184	1.4247	2.37243	1.98326	1.40461	1.23462	1.60829	2.01181	1.62728	0.736226	1.26539	1.19726	3.39478	1.46309	1.60675	0.751829	0.78304	1.99612	1.52834	1.19485	2.6112	1.73561	1.61461	1.82016	1.19259
Cell_0215	FOXO_TR	Glucose 17 mM + Glutamine 2.500000e-01 mM + Insulin 10000 ng/ml + EAA 1.000000e-01 X	1.32512	1.64071	2.73596	2.41038	1.23252	1.26398	3.07496	2.58975	2.82179	1.8837	2.3037	2.43343	2.72258	1.61801	2.53849	2.32093	2.60186	2.91877	1.39871	2.27743	2.82752	3.35595	3.50763	1.07821	1.81949	3.07191	2.16447	1.03617	1.78743	2.4349	2.63641	2.00349	1.72512	2.40182	3.33053	2.14283	2.21655	0.961265	1.53845	2.54316	2.09118	1.6733	1.72076	2.85506	2.8831	2.42261	1.09095
Cell_0215	AMPKARt2	Glucose 17 mM + Glutamine 2.500000e-01 mM + Insulin 10000 ng/ml + EAA 1.000000e-01 X	0.637604	0.519741	0.382554	0.571781	0.261529	0.639301	0.497747	0.508088	0.587825	0.545619	0.595288	0.569027	0.585339	0.685589	0.591501	0.555206	0.717735	0.474466	0.511292	0.665584	0.598443	0.631764	0.329989	0.640234	0.421095	0.564516	0.519205	0.719917	0.673718	0.593703	0.688181	0.475937	0.702135	0.672768	0.558703	0.6628	0.607319	0.473583	0.476172	0.657242	0.481835	0.684014	0.462322	0.502135	0.622717	0.551974	0.5788
Cell_0216	TFEB_TR	Glucose 17 mM + Glutamine 2.500000e-01 mM + Insulin 10000 ng/ml + EAA 1.000000e-01 X	0.464469	1.53716	2.35781	1.13324	0.812166	0.747019	1.90762	2.33748	1.31999	1.9919	1.88705	1.57182	1.36266	1.80066	1.60057	1.47507	1.28674	1.595	2.45357	1.01151	2.2398	2.02344	1.97727	1.30301	2.39326	1.87834	1.42378	0.99969	1.83868	1.84768	1.78049	0.677086	1.23386	1.13429	3.47849	1.58875	1.64413	0.755921	0.765412	2.01623	1.52552	1.17156	2.7931	1.83827	1.97965	1.45958	1.23336
Cell_0216	FOXO_TR	Glucose 17 mM + Glutamine 2.500000e-01 mM + Insulin 10000 ng/ml + EAA 1.000000e-01 X	1.33657	1.62774	2.8169	2.35213	1.22837	1.22694	3.11976	2.66175	3.26374	1.87193	2.31611	2.47656	2.73495	1.62784	2.52807	2.3701	2.53221	2.95175	1.37342	2.21411	2.84796	3.43213	3.51776	1.05309	1.83257	3.08947	1.98551	1.28562	1.81663	2.47613	2.61154	1.98674	1.76554	2.3612	3.29618	2.22956	2.32487	0.952129	1.49058	2.60634	2.05087	1.67546	1.61207	2.89134	2.91263	2.27007	1.04424
Cell_0216	AMPKARt2	Glucose 17 mM + Glutamine 2.500000e-01 mM + Insulin 10000 ng/ml + EAA 1.000000e-01 X	0.648139	0.527078	0.393429	0.560586	0.262796	0.658228	0.499598	0.543129	0.54792	0.526512	0.631336	0.56476	0.599046	0.687589	0.573032	0.57945	0.709925	0.476218	0.528598	0.667989	0.591542	0.611605	0.317296	0.652021	0.424344	0.570303	0.527855	0.714639	0.667083	0.602458	0.687579	0.486131	0.701039	0.694907	0.569313	0.665295	0.598397	0.479237	0.488877	0.649141	0.484444	0.707039	0.461771	0.501622	0.623475	0.556512	0.58726
Cell_0217	TFEB_TR	Glucose 17 mM + Glutamine 2.500000e-01 mM + Insulin 10000 ng/ml + EAA 1.000000e-01 X	0.483372	1.51657	2.61869	1.17561	0.860824	0.749541	1.76729	2.41938	1.19382	2.0767	1.47748	1.62018	1.46698	1.77737	1.56449	1.79017	1.26548	1.4458	2.44162	1.09176	2.16649	2.21859	2.08204	1.37841	1.2986	1.75392	1.4813	1.45404	2.12422	1.67194	2.03687	0.649653	1.31277	1.25967	3.40645	1.30997	1.69751	0.750376	0.770879	2.24934	1.48799	1.23636	3.00721	1.92513	2.13339	1.26207	1.17943
Cell_0217	FOXO_TR	Glucose 17 mM + Glutamine 2.500000e-01 mM + Insulin 10000 ng/ml + EAA 1.000000e-01 X	1.33341	1.59728	2.66543	2.41397	1.24548	1.20484	3.04541	2.64609	3.21801	1.80626	2.24693	2.592	2.64169	1.6494	2.54218	2.38195	2.50903	2.95583	1.36562	2.14908	2.83603	3.39015	3.48341	1.07278	1.90526	3.13992	1.82405	1.8805	1.78828	2.49304	2.5322	2.02937	1.78337	2.34497	3.17632	2.38811	2.46405	0.935741	1.6328	2.69894	1.89956	1.72716	1.55422	2.73999	3.09234	2.16069	1.02031
Cell_0217	AMPKARt2	Glucose 17 mM + Glutamine 2.500000e-01 mM + Insulin 10000 ng/ml + EAA 1.000000e-01 X	0.651758	0.53585	0.387077	0.54736	0.258565	0.654082	0.486096	0.55835	0.55138	0.531084	0.623986	0.565165	0.597886	0.686309	0.565263	0.587853	0.703672	0.482684	0.534048	0.67058	0.610456	0.608991	0.324035	0.656622	0.473067	0.580701	0.539162	0.719285	0.655302	0.61465	0.681768	0.467746	0.705512	0.731112	0.561814	0.657347	0.587582	0.471807	0.498067	0.647352	0.465416	0.704545	0.461861	0.514436	0.63681	0.56164	0.592321
Cell_0218	TFEB_TR	Glucose 17 mM + Glutamine 2.500000e-01 mM + Insulin 10000 ng/ml + EAA 1.000000e-01 X	0.507932	1.48634	2.87939	1.19692	0.881716	0.761884	1.73331	2.39922	1.52058	2.57668	1.47858	1.72532	1.17505	1.7772	1.6137	1.79005	1.29754	1.58877	2.21871	1.1392	2.00018	2.41071	2.21797	1.45067	1.23136	1.79605	1.35847	1.96477	2.30435	1.69343	2.28294	0.640269	1.43454	1.1648	3.39273	1.22405	1.67639	0.758887	0.804882	2.25476	1.47873	1.11744	2.97163	1.85385	1.83337	1.23757	1.23662
Cell_0218	FOXO_TR	Glucose 17 mM + Glutamine 2.500000e-01 mM + Insulin 10000 ng/ml + EAA 1.000000e-01 X	1.3043	1.56163	2.44042	2.42044	1.25663	1.20587	2.89906	2.63008	3.20525	1.76271	2.2311	2.65117	2.5972	1.53018	2.50986	2.3087	2.57583	2.97398	1.3608	2.15722	2.80487	3.28017	3.64778	1.11929	1.86906	3.17998	1.87629	2.27521	1.73488	2.51661	2.5017	2.03803	1.73158	2.36642	3.09709	2.45129	2.38844	0.93296	1.89353	2.72715	1.76881	1.74177	1.54734	2.64219	3.13617	2.21355	1.3473
Cell_0218	AMPKARt2	Glucose 17 mM + Glutamine 2.500000e-01 mM + Insulin 10000 ng/ml + EAA 1.000000e-01 X	0.659249	0.528056	0.376772	0.532171	0.264717	0.635641	0.468232	0.531351	0.555283	0.539765	0.592957	0.56427	0.582456	0.694594	0.568985	0.562642	0.702023	0.478481	0.527409	0.672366	0.632618	0.611804	0.338819	0.662292	0.47335	0.590986	0.552021	0.736024	0.646844	0.606737	0.681233	0.465795	0.714792	0.673103	0.550144	0.641228	0.567884	0.470999	0.514555	0.656115	0.453416	0.687476	0.472203	0.540524	0.642494	0.575655	0.611388
Cell_0219	TFEB_TR	Glucose 17 mM + Glutamine 2.500000e-01 mM + Insulin 10000 ng/ml + EAA 1.000000e-01 X	0.518053	1.45223	2.47945	1.17261	0.87225	0.768264	1.77313	2.31384	1.82651	2.71978	1.79201	1.70432	1.07912	1.83004	1.7627	1.46129	1.53126	2.00648	2.08389	1.12837	1.98298	2.27039	2.30624	1.504	1.20168	1.96747	1.73717	1.56481	2.47247	1.66625	2.2643	0.62002	1.30781	1.19152	3.10599	1.61639	1.63252	0.780755	0.860477	2.10943	1.4522	0.994327	2.7115	1.48901	1.64308	1.14732	1.26571
Cell_0219	FOXO_TR	Glucose 17 mM + Glutamine 2.500000e-01 mM + Insulin 10000 ng/ml + EAA 1.000000e-01 X	1.30125	1.5322	2.53435	2.23847	1.23574	1.21784	2.88023	2.58167	3.289	1.80758	2.34046	2.60653	2.64243	1.5666	2.43813	2.29288	2.67752	2.97533	1.38419	2.18377	2.77139	3.28166	3.79008	1.13799	1.911	3.18224	2.03077	2.30916	1.71479	2.43778	2.45755	2.00533	1.66078	2.46723	3.07097	2.39944	2.24438	0.948295	2.1148	2.72635	1.62954	1.79517	1.53875	2.36417	2.98878	2.20618	1.83502
Cell_0219	AMPKARt2	Glucose 17 mM + Glutamine 2.500000e-01 mM + Insulin 10000 ng/ml + EAA 1.000000e-01 X	0.667947	0.518588	0.366671	0.532661	0.276114	0.635838	0.473468	0.535224	0.538838	0.586824	0.587135	0.549874	0.581706	0.708283	0.546726	0.561781	0.706536	0.476865	0.530191	0.672023	0.617774	0.605033	0.353129	0.676872	0.480303	0.594361	0.565182	0.739991	0.652218	0.591428	0.684023	0.478679	0.70875	0.585526	0.543194	0.637746	0.56475	0.482568	0.532504	0.659996	0.453807	0.69002	0.476936	0.727609	0.639669	0.579968	0.634832
Cell_0220	TFEB_TR	Glucose 17 mM + Glutamine 2.500000e-01 mM + Insulin 10000 ng/ml + EAA 1.000000e-01 X	0.548822	1.46438	2.20604	1.14797	0.877872	0.760618	1.78823	2.18882	1.75569	2.58517	2.23915	1.66284	1.13604	1.9321	1.80518	1.41184	1.74935	2.04198	2.14904	1.05727	2.13002	2.18559	2.35573	1.62797	1.28536	1.86553	2.2764	1.28368	2.34771	1.55808	1.9124	0.584397	1.19653	1.36143	2.69729	1.57262	1.65542	0.785301	0.902511	2.23027	1.40649	1.16372	2.55921	1.47866	1.80817	1.1836	1.12183
Cell_0220	FOXO_TR	Glucose 17 mM + Glutamine 2.500000e-01 mM + Insulin 10000 ng/ml + EAA 1.000000e-01 X	1.3534	1.57561	2.69532	2.05064	1.21369	1.22877	2.98002	2.44944	3.28981	1.83127	2.37255	2.55477	2.70157	2.21744	2.37734	2.32722	2.70964	2.93225	1.45371	2.12949	2.78634	3.41958	3.81917	1.14437	1.90801	3.21498	2.08723	2.24986	1.68985	2.35996	2.4046	1.96075	1.62079	2.48252	3.01231	2.37154	2.23745	0.957044	2.11443	2.7086	1.49684	1.8673	1.54176	2.20366	2.94332	2.13001	1.99506
Cell_0220	AMPKARt2	Glucose 17 mM + Glutamine 2.500000e-01 mM + Insulin 10000 ng/ml + EAA 1.000000e-01 X	0.667916	0.530542	0.366137	0.535281	0.277904	0.655371	0.487934	0.572275	0.536333	0.654025	0.597494	0.527786	0.581526	0.694412	0.522183	0.584717	0.71571	0.480912	0.532189	0.678387	0.609141	0.606263	0.354509	0.680593	0.487246	0.592166	0.576566	0.723938	0.66129	0.594923	0.683405	0.47345	0.707118	0.610889	0.537823	0.638788	0.565679	0.47963	0.521781	0.663555	0.452457	0.705921	0.466182	0.727945	0.64679	0.578947	0.632701
Cell_0221	TFEB_TR	Glucose 17 mM + Glutamine 2.500000e-01 mM + Insulin 10000 ng/ml + EAA 1.000000e-01 X	0.576036	1.47947	2.44583	1.13406	0.902249	0.788685	1.85441	2.04244	1.66347	2.94406	1.30518	1.71809	1.31692	2.00737	1.83024	1.46766	1.83271	1.62737	2.10649	0.952378	2.24362	2.35508	2.38254	1.60881	1.43541	1.59271	1.96616	1.52116	1.93066	1.63676	1.71834	0.552618	1.33627	1.30594	2.61153	1.2197	1.67471	0.793371	0.892705	2.37453	1.359	1.25691	2.66596	1.48639	1.96157	1.43036	1.1534
Cell_0221	FOXO_TR	Glucose 17 mM + Glutamine 2.500000e-01 mM + Insulin 10000 ng/ml + EAA 1.000000e-01 X	1.36566	1.67657	2.60325	1.99499	1.24413	1.23188	3.02136	2.38899	3.18894	1.79142	2.03793	2.56392	2.63754	3.16511	2.32874	2.29981	2.72553	2.91876	1.45149	2.06396	2.86523	3.62544	3.8627	1.1491	1.85859	3.28431	2.02855	2.16765	1.60486	2.47393	2.42066	1.91594	1.64884	2.29671	2.96562	2.38729	2.20455	0.970732	1.91323	2.69466	1.41849	1.82878	1.57108	2.18512	2.98654	2.09514	1.95088
Cell_0221	AMPKARt2	Glucose 17 mM + Glutamine 2.500000e-01 mM + Insulin 10000 ng/ml + EAA 1.000000e-01 X	0.657335	0.543992	0.369137	0.514573	0.283659	0.660425	0.485618	0.579432	0.538682	0.661358	0.539062	0.535794	0.566718	0.65707	0.52073	0.57585	0.716634	0.479158	0.536413	0.675737	0.631062	0.620957	0.353186	0.670888	0.491383	0.593785	0.58616	0.701389	0.659307	0.602913	0.683886	0.464857	0.733005	0.661024	0.543251	0.625332	0.562096	0.472826	0.500615	0.675713	0.447549	0.705984	0.456192	0.730857	0.665324	0.582073	0.619815
Cell_0222	TFEB_TR	Glucose 17 mM + Glutamine 2.500000e-01 mM + Insulin 10000 ng/ml + EAA 1.000000e-01 X	0.543861	1.42623	2.54312	1.12908	0.89816	0.811441	1.9801	2.09474	1.72435	3.13603	1.46191	1.78784	1.79446	2.06226	1.96121	1.29022	1.71093	1.41891	1.97455	0.96189	2.27022	2.46285	2.29257	1.47853	1.5287	1.65282	1.52768	1.2707	1.49972	1.80735	1.92078	0.520524	1.38132	1.31965	2.66813	1.40933	1.62732	0.816047	0.865595	2.22477	1.28317	1.09686	2.85855	1.39922	1.93196	1.49278	1.34056
Cell_0222	FOXO_TR	Glucose 17 mM + Glutamine 2.500000e-01 mM + Insulin 10000 ng/ml + EAA 1.000000e-01 X	1.31612	1.6672	2.50131	1.97747	1.27169	1.21138	2.97443	2.42005	3.18502	1.78473	2.14438	2.55593	2.46798	3.70311	2.30534	2.20824	2.72928	2.96146	1.37122	2.08361	2.87512	3.72978	3.86646	1.12949	1.85724	3.31387	1.97781	2.11088	1.51766	2.63063	2.39991	1.88404	2.02478	2.10416	2.9675	2.35691	2.12791	0.997704	1.77937	2.68903	1.34704	1.7352	1.59028	2.1269	2.90738	2.04974	2.01056
Cell_0222	AMPKARt2	Glucose 17 mM + Glutamine 2.500000e-01 mM + Insulin 10000 ng/ml + EAA 1.000000e-01 X	0.645116	0.539194	0.363316	0.494052	0.306184	0.652297	0.482931	0.570235	0.527614	0.634195	0.554166	0.568012	0.571269	0.633221	0.525497	0.55895	0.706273	0.476253	0.554845	0.622103	0.630863	0.622877	0.392288	0.676571	0.495229	0.592703	0.588335	0.694315	0.662148	0.584474	0.687179	0.462891	0.731321	0.62718	0.559455	0.613333	0.563498	0.47911	0.497356	0.678105	0.451264	0.692258	0.449305	0.732006	0.673062	0.579816	0.619839
Cell_0223	TFEB_TR	Glucose 17 mM + Glutamine 2.500000e-01 mM + Insulin 10000 ng/ml + EAA 1.000000e-01 X	0.505213	1.39448	2.39542	1.12166	0.848548	0.768765	2.02275	2.36515	1.70154	2.52035	1.41154	1.76965	1.76854	2.159	2.0701	1.32701	1.45963	1.65683	1.93236	1.07779	2.38408	2.43344	2.10608	1.38358	1.50978	1.86028	1.7086	0.914235	1.18134	0.762496	2.04395	0.5028	1.39064	1.41018	2.83362	1.58617	1.57709	0.806147	0.885681	1.99621	1.22742	1.0194	2.79329	1.36535	1.82819	1.35028	1.30955
Cell_0223	FOXO_TR	Glucose 17 mM + Glutamine 2.500000e-01 mM + Insulin 10000 ng/ml + EAA 1.000000e-01 X	1.27752	1.54501	2.51313	1.89992	1.2379	1.19542	2.94746	2.37922	3.39221	1.79397	2.22564	2.49607	2.37723	3.777	2.32726	2.13938	2.58783	2.95864	1.3812	2.12766	2.73806	3.59264	3.80684	1.12614	1.83608	3.35346	1.96166	2.1701	1.49786	1.25521	2.32268	1.84249	2.85109	1.99532	3.00085	2.30948	2.13564	0.993727	1.81158	2.66409	1.28952	1.70208	1.5872	2.02999	2.81118	2.01099	2.03987
Cell_0223	AMPKARt2	Glucose 17 mM + Glutamine 2.500000e-01 mM + Insulin 10000 ng/ml + EAA 1.000000e-01 X	0.638181	0.529132	0.365595	0.497066	0.330888	0.655056	0.487196	0.57509	0.527423	0.648509	0.541982	0.56968	0.586548	0.617837	0.527855	0.574238	0.708931	0.480346	0.560349	0.565191	0.606599	0.61483	0.459147	0.699742	0.492479	0.580392	0.587626	0.705603	0.680905	0.533964	0.689681	0.457822	0.682999	0.579798	0.563408	0.618049	0.548823	0.48839	0.499478	0.668172	0.461363	0.686558	0.442678	0.737081	0.668245	0.582414	0.617291
Cell_0224	TFEB_TR	Glucose 17 mM + Glutamine 2.500000e-01 mM + Insulin 10000 ng/ml + EAA 1.000000e-01 X	0.511235	1.44897	2.46841	1.09842	0.788468	0.752839	1.94806	2.36143	1.54096	2.16773	1.20014	1.68239	1.08052	2.29599	2.21433	1.57926	1.46044	1.88728	1.9029	1.10076	2.51149	2.58387	1.92364	1.22494	1.41782	1.89522	1.69188	1.12912	1.21326	0.733847	1.71544	0.522917	1.59994	1.10886	3.13779	1.27845	1.54892	0.774419	0.920414	1.9642	1.24676	1.05829	2.60949	1.40606	1.60671	1.3571	1.26855
Cell_0224	FOXO_TR	Glucose 17 mM + Glutamine 2.500000e-01 mM + Insulin 10000 ng/ml + EAA 1.000000e-01 X	1.24591	1.51304	2.51775	1.80102	1.21815	1.22639	2.95652	2.27897	3.5166	1.74748	2.19622	2.5144	2.39414	3.74478	2.36918	2.15908	2.50779	2.89507	1.39982	2.09834	2.61753	3.39529	3.8256	1.16583	1.80886	3.42591	1.94074	2.21368	1.50268	1.26189	2.31373	1.8054	3.48671	1.89125	3.05952	2.37267	2.06826	0.95949	1.80724	2.59428	1.33738	1.71005	1.597	2.02826	2.77521	1.99323	1.95478
Cell_0224	AMPKARt2	Glucose 17 mM + Glutamine 2.500000e-01 mM + Insulin 10000 ng/ml + EAA 1.000000e-01 X	0.638377	0.523107	0.372085	0.496348	0.34039	0.658018	0.478945	0.572696	0.537246	0.664809	0.525715	0.555441	0.580258	0.59658	0.525798	0.580142	0.728813	0.485279	0.553168	0.570243	0.610734	0.623313	0.487394	0.711456	0.490125	0.569494	0.592409	0.709214	0.695724	0.539561	0.695046	0.454805	0.675388	0.566755	0.547335	0.622244	0.53503	0.502315	0.512122	0.667536	0.459456	0.691469	0.451605	0.746927	0.667808	0.604528	0.606118
Cell_0225	TFEB_TR	Glucose 17 mM + Glutamine 2.500000e-01 mM + Insulin 10000 ng/ml + EAA 1.000000e-01 X	0.517407	1.47622	2.31667	1.11614	0.741958	0.779512	1.95218	2.08272	1.41766	2.52686	1.20421	1.62757	1.00234	2.41397	2.4366	1.55353	1.64855	1.67292	1.86781	1.03896	2.41573	2.77787	1.72366	1.16262	1.37508	2.00275	1.5609	1.34246	1.5596	0.699335	1.36737	0.54835	1.6413	0.815676	3.10373	1.26907	1.51052	0.761688	0.903411	2.02517	1.30361	1.16046	2.8023	1.22709	1.44996	1.42704	1.40843
Cell_0225	FOXO_TR	Glucose 17 mM + Glutamine 2.500000e-01 mM + Insulin 10000 ng/ml + EAA 1.000000e-01 X	1.21531	1.57916	2.56218	1.77588	1.22382	1.23687	2.96917	2.25066	3.37401	1.71486	2.12198	2.61471	2.40688	3.73872	2.37274	2.22421	2.73123	2.91889	1.36554	1.97545	2.58584	3.3344	3.91837	1.19671	1.90703	3.42286	1.92462	2.14234	1.49214	1.26203	2.30455	1.84813	3.43246	1.82782	3.01214	2.52677	1.8818	0.951933	1.68865	2.46472	1.50254	1.73577	1.61202	2.0352	2.66032	1.90809	1.93767
Cell_0225	AMPKARt2	Glucose 17 mM + Glutamine 2.500000e-01 mM + Insulin 10000 ng/ml + EAA 1.000000e-01 X	0.644895	0.515389	0.361612	0.48327	0.337025	0.651959	0.470776	0.554902	0.532159	0.647317	0.524645	0.566557	0.584835	0.587239	0.515915	0.561153	0.740358	0.483092	0.565218	0.575147	0.620341	0.635853	0.474453	0.704821	0.503328	0.566903	0.588645	0.697883	0.696014	0.553964	0.70108	0.452512	0.717093	0.557444	0.532867	0.619431	0.556805	0.517568	0.536097	0.672639	0.447573	0.687783	0.469473	0.742128	0.658147	0.623649	0.605449
Cell_0226	TFEB_TR	Glucose 17 mM + Glutamine 2.500000e-01 mM + Insulin 10000 ng/ml + EAA 1.000000e-01 X	0.516515	1.44416	1.81911	1.18849	0.717437	0.733244	2.09657	2.12714	1.38615	2.58105	1.4635	1.62926	1.56967	2.44374	2.43589	1.45023	1.53683	1.36743	1.96095	1.02926	2.45512	2.55595	1.50188	1.29808	1.4316	2.16787	2.03765	1.49046	1.63886	0.675608	1.45016	0.570485	1.47585	1.00099	2.83648	1.58889	1.51824	0.759137	0.847347	1.998	1.36774	1.32108	3.06857	1.08555	1.6379	1.32454	1.34591
Cell_0226	FOXO_TR	Glucose 17 mM + Glutamine 2.500000e-01 mM + Insulin 10000 ng/ml + EAA 1.000000e-01 X	1.21623	1.614	2.62083	1.79412	1.2299	1.17506	3.02206	2.33512	3.27798	1.73899	2.10148	2.62822	2.39699	3.77212	2.31847	2.2197	2.87858	3.02536	1.64005	1.8318	2.53067	3.37127	3.9131	1.20667	2.01567	3.41626	1.90533	2.12955	1.48672	1.27231	2.25951	1.91953	3.18335	1.81565	2.82992	2.62306	1.80659	0.957155	1.58043	2.38522	1.6797	1.76191	1.59764	2.04238	2.5893	1.79525	1.99532
Cell_0226	AMPKARt2	Glucose 17 mM + Glutamine 2.500000e-01 mM + Insulin 10000 ng/ml + EAA 1.000000e-01 X	0.648678	0.508006	0.353948	0.479212	0.335401	0.643126	0.484568	0.540443	0.523345	0.647009	0.536766	0.568464	0.60678	0.587828	0.500282	0.570293	0.741637	0.474786	0.567596	0.540789	0.589538	0.633581	0.465764	0.69454	0.506091	0.566379	0.575986	0.696399	0.689811	0.564125	0.699548	0.456386	0.721446	0.545422	0.539321	0.616889	0.571785	0.520376	0.535951	0.66947	0.441961	0.672075	0.469769	0.724521	0.630947	0.620902	0.61386
Cell_0227	TFEB_TR	Glucose 17 mM + Glutamine 2.500000e-01 mM + Insulin 10000 ng/ml + EAA 1.000000e-01 X	0.543931	1.44667	2.11373	1.22105	0.715772	0.684556	2.11371	2.38159	1.36993	2.16224	1.59372	1.62989	1.65297	2.41934	2.22346	0.94604	1.34878	1.4164	2.13165	1.06037	2.64066	2.24403	1.34722	1.32804	1.56096	2.03688	2.19364	1.8037	1.32828	0.659222	1.43574	0.594443	1.48877	1.2403	2.82709	1.52793	1.62641	0.776189	0.797257	2.00663	1.44683	1.31664	2.80959	1.3063	1.69445	1.17198	1.1603
Cell_0227	FOXO_TR	Glucose 17 mM + Glutamine 2.500000e-01 mM + Insulin 10000 ng/ml + EAA 1.000000e-01 X	1.2184	1.65788	2.6399	1.76766	1.25558	1.1374	3.07452	2.42431	3.39873	1.72712	2.08723	2.55574	2.38595	3.83556	2.24961	2.1562	2.68097	3.03657	2.21706	1.75313	2.45733	3.46647	3.78565	1.22547	1.97866	3.47656	1.89501	2.31293	1.46408	1.27365	2.33828	1.90698	3.20401	1.79995	2.72547	2.58783	1.857	0.950018	1.50352	2.42828	1.82563	1.75164	1.59243	2.11237	2.69016	1.7282	1.98413
Cell_0227	AMPKARt2	Glucose 17 mM + Glutamine 2.500000e-01 mM + Insulin 10000 ng/ml + EAA 1.000000e-01 X	0.645398	0.506877	0.364953	0.47346	0.33448	0.616613	0.502432	0.538272	0.520705	0.662159	0.558081	0.551192	0.60375	0.587121	0.471803	0.65366	0.739241	0.474664	0.520119	0.518347	0.569401	0.635436	0.465813	0.69142	0.485331	0.570822	0.57939	0.707084	0.689908	0.562044	0.69662	0.478902	0.698198	0.542995	0.558217	0.602278	0.558387	0.523697	0.510033	0.667517	0.441365	0.662669	0.461951	0.724804	0.632273	0.613906	0.61413
Cell_0228	TFEB_TR	Glucose 17 mM + Glutamine 2.500000e-01 mM + Insulin 10000 ng/ml + EAA 1.000000e-01 X	0.576597	1.47153	2.87912	1.21568	0.689004	0.757315	1.98854	2.29327	1.37655	2.04228	1.59647	1.65526	1.29656	2.43181	2.14747	1.09944	1.67523	1.51551	2.15163	1.11172	2.21206	2.29664	1.27743	1.29032	1.79158	1.80246	1.59192	1.65501	1.2602	0.649631	1.00481	0.583852	1.53661	1.28725	2.72212	1.27593	1.70431	0.806072	0.809917	2.08042	1.54901	1.29496	2.46642	1.4053	1.31415	1.16059	1.25384
Cell_0228	FOXO_TR	Glucose 17 mM + Glutamine 2.500000e-01 mM + Insulin 10000 ng/ml + EAA 1.000000e-01 X	1.20913	1.74022	2.71026	1.75076	1.18364	1.16718	3.03662	2.3615	3.49979	1.65061	2.06114	2.51497	2.34522	3.80755	2.17657	1.92835	2.55179	3.02571	2.49257	1.67313	2.40659	3.51976	3.70858	1.27712	1.97226	3.4397	1.95367	2.50787	1.41806	1.29262	2.47982	1.86193	3.25024	1.7831	2.71457	2.44849	1.87932	1.08649	1.46039	2.4323	2.05945	1.76134	1.59715	2.11832	2.71693	1.71152	1.94407
Cell_0228	AMPKARt2	Glucose 17 mM + Glutamine 2.500000e-01 mM + Insulin 10000 ng/ml + EAA 1.000000e-01 X	0.644969	0.509671	0.372772	0.46574	0.331477	0.585067	0.504372	0.545573	0.510073	0.661132	0.563887	0.556283	0.596171	0.595121	0.458107	0.672135	0.72941	0.494858	0.460566	0.502268	0.60024	0.648146	0.463859	0.701252	0.497381	0.576038	0.587997	0.706016	0.703403	0.559116	0.697451	0.49482	0.69798	0.555269	0.562331	0.582844	0.560604	0.535237	0.482929	0.672156	0.440638	0.660727	0.471293	0.741693	0.670812	0.605358	0.605557
Cell_0229	TFEB_TR	Glucose 17 mM + Glutamine 2.500000e-01 mM + Insulin 10000 ng/ml + EAA 1.000000e-01 X	0.593524	1.47236	2.81072	1.25223	0.634893	0.886538	2.03902	2.04685	1.4379	2.12327	1.6046	1.74592	1.16904	2.45985	2.16809	1.26138	2.1209	1.64389	2.01548	1.19858	1.9164	2.34882	1.23349	1.35568	1.93926	1.86523	1.47438	1.06651	1.62786	0.677887	0.947356	0.572788	1.47263	1.28483	1.28801	1.19685	1.70267	0.803873	0.910568	1.99594	1.69555	1.52227	2.60559	1.28407	1.19105	1.32642	1.31134
Cell_0229	FOXO_TR	Glucose 17 mM + Glutamine 2.500000e-01 mM + Insulin 10000 ng/ml + EAA 1.000000e-01 X	1.21671	1.78945	2.70679	1.77564	1.13796	1.20217	2.99959	2.22811	3.45966	1.59821	2.04989	2.51037	2.28983	3.69626	2.04609	1.75186	2.64761	3.157	2.36734	1.53535	2.40448	3.40023	3.73105	1.3625	2.15154	3.35817	2.01933	2.47513	1.42758	1.37299	2.50705	1.84744	3.30802	1.73644	1.73666	2.31874	1.86541	1.53143	1.50867	2.3615	2.39105	1.82742	1.54551	2.02874	2.65278	1.77145	1.9765
Cell_0229	AMPKARt2	Glucose 17 mM + Glutamine 2.500000e-01 mM + Insulin 10000 ng/ml + EAA 1.000000e-01 X	0.649565	0.514354	0.366298	0.475083	0.350587	0.587573	0.500031	0.553155	0.499802	0.664078	0.542737	0.568828	0.613251	0.60163	0.5156	0.68374	0.726551	0.518689	0.445715	0.475548	0.614498	0.646625	0.466193	0.714574	0.544487	0.570691	0.576532	0.70107	0.711868	0.557043	0.69631	0.491327	0.691215	0.568404	0.597327	0.59189	0.580132	0.541597	0.462712	0.67419	0.435813	0.652878	0.487204	0.74547	0.674815	0.579611	0.598548
Cell_0230	TFEB_TR	Glucose 17 mM + Glutamine 2.500000e-01 mM + Insulin 10000 ng/ml + EAA 1.000000e-01 X	0.628695	1.48203	2.62573	1.28695	0.655112	1.02085	2.18311	2.04278	1.43597	1.87787	1.41642	1.80138	1.26556	2.45464	2.09808	1.17797	1.94479	2.00016	1.93918	1.2347	2.98967	2.23844	1.18842	1.29945	1.71396	2.02435	1.86026	0.977714	1.79469	0.722999	1.41743	0.608406	1.5336	1.18647	1.59943	1.11579	1.83597	0.808614	1.00471	1.83945	1.84912	1.71524	2.77292	1.37117	1.41161	1.54057	1.22586
Cell_0230	FOXO_TR	Glucose 17 mM + Glutamine 2.500000e-01 mM + Insulin 10000 ng/ml + EAA 1.000000e-01 X	1.22037	1.85877	2.50239	1.7569	1.50954	1.21692	3.02918	2.1834	3.37956	1.59404	2.036	2.51529	2.27982	3.69817	1.87446	1.61618	2.64592	3.24099	2.28973	1.48045	2.52995	3.29689	3.73796	1.38369	2.31998	3.41691	1.98154	2.33588	1.49255	1.42212	2.51662	1.84136	3.52602	1.66573	1.70811	2.3365	1.87409	2.0914	1.54376	2.36653	2.5494	1.86484	1.51131	1.96709	2.72835	1.84059	2.02791
Cell_0230	AMPKARt2	Glucose 17 mM + Glutamine 2.500000e-01 mM + Insulin 10000 ng/ml + EAA 1.000000e-01 X	0.650361	0.519344	0.375799	0.473716	0.388768	0.595073	0.500805	0.551929	0.499537	0.665845	0.533047	0.569944	0.621257	0.597188	0.59982	0.682099	0.731661	0.527619	0.47455	0.469642	0.579181	0.628586	0.469182	0.720614	0.54738	0.562647	0.566146	0.711467	0.703417	0.549567	0.69715	0.495697	0.668184	0.567436	0.630696	0.612924	0.597317	0.548216	0.457459	0.673884	0.419587	0.638162	0.488256	0.735894	0.639786	0.557463	0.595545
Cell_0231	TFEB_TR	Glucose 17 mM + Glutamine 2.500000e-01 mM + Insulin 10000 ng/ml + EAA 1.000000e-01 X	0.680345	0.780257	3.05177	1.279	0.749085	1.15834	2.11139	2.12204	1.39658	1.76202	1.21561	1.71973	1.2667	2.41165	2.09875	0.973028	1.6124	2.00321	1.99263	1.17483	3.94408	2.19909	1.1695	1.2048	1.42735	1.97748	1.76177	1.36247	1.495	0.716885	1.57483	0.624726	1.72535	1.06547	1.66407	1.02646	2.03769	0.863099	1.05699	1.86816	1.89038	1.72327	2.62879	1.36889	1.36075	1.63828	1.46786
Cell_0231	FOXO_TR	Glucose 17 mM + Glutamine 2.500000e-01 mM + Insulin 10000 ng/ml + EAA 1.000000e-01 X	1.21451	2.21074	2.35048	1.73716	2.02987	1.19615	2.9748	2.14335	3.31911	1.56567	2.04538	2.49383	2.28578	3.77014	1.8305	1.57297	2.57184	3.11974	2.34736	1.51788	2.64113	3.44379	3.73005	1.36772	2.31173	3.47592	1.91295	2.33262	1.51331	1.34672	2.5908	1.90948	3.43173	1.65319	1.75285	2.48013	1.8783	2.40439	1.52926	2.3959	2.35833	1.84331	1.53108	1.94338	2.77694	1.85704	2.01774
Cell_0231	AMPKARt2	Glucose 17 mM + Glutamine 2.500000e-01 mM + Insulin 10000 ng/ml + EAA 1.000000e-01 X	0.651458	0.690087	0.435399	0.462098	0.396716	0.571853	0.502867	0.544778	0.491083	0.651493	0.557561	0.579384	0.607631	0.604153	0.620287	0.67737	0.727454	0.531631	0.502592	0.477626	0.557947	0.619495	0.464157	0.732325	0.510967	0.556969	0.575403	0.711255	0.698385	0.545977	0.700875	0.497737	0.661628	0.572703	0.638015	0.609325	0.611621	0.556454	0.46002	0.672163	0.408406	0.629518	0.475159	0.724501	0.643291	0.559951	0.592135
Cell_0232	TFEB_TR	Glucose 17 mM + Glutamine 2.500000e-01 mM + Insulin 10000 ng/ml + EAA 1.000000e-01 X	0.701078	0.827355	3.157	1.30992	0.792333	1.28427	1.94118	2.15228	1.6402	2.20864	1.35677	1.6068	1.16063	2.32229	2.30798	0.994131	1.80929	1.63677	2.0649	1.11717	3.3243	2.22037	1.19467	1.40419	1.56269	1.92989	1.45178	1.51355	1.25137	0.678239	1.42496	0.584566	1.84279	1.04543	1.42067	1.03211	1.95596	0.897165	1.17399	1.97247	1.8017	1.67486	2.70839	1.1964	1.33604	1.6609	1.70464
Cell_0232	FOXO_TR	Glucose 17 mM + Glutamine 2.500000e-01 mM + Insulin 10000 ng/ml + EAA 1.000000e-01 X	1.21281	2.20487	2.37333	1.82126	2.16446	1.17647	2.83928	2.07155	3.30929	1.5311	2.09426	2.42921	2.27883	3.71029	1.98064	1.57139	2.60305	3.01455	2.32075	1.47959	2.5671	3.5936	3.75444	1.62271	2.22702	3.41416	1.91176	2.42902	1.47692	1.22101	2.62591	2.03185	3.0085	1.65719	1.86959	2.58579	1.79433	2.4174	1.63688	2.38152	2.01567	1.82597	1.48075	1.96839	2.62828	1.91001	1.92821
Cell_0232	AMPKARt2	Glucose 17 mM + Glutamine 2.500000e-01 mM + Insulin 10000 ng/ml + EAA 1.000000e-01 X	0.660937	0.677101	0.512516	0.489019	0.366399	0.564897	0.504158	0.54202	0.477889	0.652593	0.580483	0.580821	0.597499	0.619812	0.611837	0.685952	0.725972	0.536194	0.502685	0.481658	0.574374	0.62302	0.449604	0.731257	0.499438	0.550449	0.583355	0.690753	0.702784	0.550083	0.698111	0.479468	0.659835	0.601574	0.608991	0.602291	0.603416	0.549892	0.456337	0.666847	0.414931	0.643727	0.457752	0.707169	0.667286	0.565133	0.588439
Cell_0233	TFEB_TR	Glucose 17 mM + Glutamine 2.500000e-01 mM + Insulin 10000 ng/ml + EAA 1.000000e-01 X	0.707002	0.803166	2.79047	1.38854	0.776537	1.47369	1.88296	2.27547	2.03309	2.4336	1.46923	1.63346	1.15756	2.24525	2.44702	1.10528	1.95774	1.64672	2.02211	1.09347	0.45049	2.43555	1.22932	1.65515	1.80782	2.04389	1.5069	1.41927	1.34823	0.679008	1.57325	0.54862	1.78299	0.980339	1.23658	1.09944	1.73268	0.879297	1.30945	1.98513	1.70386	1.51422	3.1151	1.34215	1.60557	1.68885	1.50489
Cell_0233	FOXO_TR	Glucose 17 mM + Glutamine 2.500000e-01 mM + Insulin 10000 ng/ml + EAA 1.000000e-01 X	1.18691	2.13748	2.39061	1.94022	2.12334	1.22709	2.8031	2.05386	3.37481	1.54359	2.10596	2.44067	2.36066	3.66982	2.06183	1.5289	2.58381	3.04497	2.14099	1.42337	1.50564	3.45552	3.7833	2.15445	2.13653	3.33331	1.93313	2.53121	1.43854	1.13882	2.63711	2.00729	3.11263	1.60052	1.97666	2.56907	1.65243	2.33958	1.74782	2.43713	1.76586	1.85161	1.57504	2.06256	2.501	1.97472	1.81066
Cell_0233	AMPKARt2	Glucose 17 mM + Glutamine 2.500000e-01 mM + Insulin 10000 ng/ml + EAA 1.000000e-01 X	0.66898	0.693025	0.54946	0.518048	0.339782	0.58908	0.507797	0.54128	0.483557	0.672709	0.55718	0.564855	0.598152	0.622007	0.629561	0.69645	0.733098	0.535069	0.496878	0.4929	0.601743	0.622825	0.426741	0.662544	0.497661	0.554569	0.579634	0.690148	0.706112	0.551722	0.698435	0.47537	0.65259	0.628224	0.588844	0.611451	0.576984	0.537573	0.455311	0.668475	0.410799	0.670514	0.454527	0.691648	0.643456	0.561814	0.585154
Cell_0234	TFEB_TR	Glucose 17 mM + Glutamine 2.500000e-01 mM + Insulin 10000 ng/ml + EAA 1.000000e-01 X	0.744805	0.754093	2.5601	1.42827	0.770555	1.70753	1.86401	2.3066	1.94611	2.03379	1.38317	1.71728	1.10564	2.25265	2.29972	1.08496	1.67364	1.77424	1.89364	1.08165	0.45934	2.61406	1.29861	1.69414	1.73789	2.0932	1.6573	1.27806	1.59555	0.709706	1.84066	0.567621	1.68608	0.906298	1.23528	1.22867	1.7227	0.864511	1.32771	2.05445	1.64451	1.30355	3.16273	1.4115	1.52771	1.65973	1.43339
Cell_0234	FOXO_TR	Glucose 17 mM + Glutamine 2.500000e-01 mM + Insulin 10000 ng/ml + EAA 1.000000e-01 X	1.15641	2.04846	2.40634	1.97573	2.15612	1.26137	2.85153	2.0361	3.42554	1.48511	2.01883	2.53158	2.48674	3.81014	1.94794	1.55093	2.50285	3.02918	1.92615	1.45189	1.51978	3.3525	3.85202	2.50977	2.05964	3.27258	1.96155	2.61289	1.43658	1.08089	2.70295	1.88746	3.5306	1.5505	1.98647	2.50536	1.60023	2.3141	1.61002	2.51702	1.61163	1.91333	2.1547	2.06512	2.47798	1.93192	1.79121
Cell_0234	AMPKARt2	Glucose 17 mM + Glutamine 2.500000e-01 mM + Insulin 10000 ng/ml + EAA 1.000000e-01 X	0.672204	0.708279	0.547232	0.499448	0.337173	0.587165	0.505788	0.53058	0.497207	0.686524	0.491313	0.563871	0.603816	0.617993	0.637208	0.691936	0.73371	0.532821	0.506421	0.503014	0.601136	0.62267	0.4135	0.561908	0.4803	0.567538	0.574975	0.702819	0.712719	0.55678	0.70926	0.492393	0.657311	0.628186	0.611257	0.614776	0.570788	0.532296	0.456957	0.676534	0.394345	0.67615	0.480235	0.688007	0.617784	0.565796	0.581128
Cell_0235	TFEB_TR	Glucose 17 mM + Glutamine 2.500000e-01 mM + Insulin 10000 ng/ml + EAA 1.000000e-01 X	0.777656	0.763513	2.41825	1.43275	0.764034	1.80535	1.81698	2.06411	1.52619	1.90039	1.54094	1.68718	0.879295	2.29177	2.16864	1.04104	1.67012	1.59849	1.87214	1.13619	0.465055	2.16383	1.4845	1.74912	1.62501	1.99268	1.54307	1.13306	1.77297	0.720043	1.81529	0.647467	1.72704	1.04571	1.16415	1.3228	1.77282	0.859687	1.30952	0.82473	1.581	1.21612	2.95339	1.06947	1.13452	1.48934	1.61592
Cell_0235	FOXO_TR	Glucose 17 mM + Glutamine 2.500000e-01 mM + Insulin 10000 ng/ml + EAA 1.000000e-01 X	1.15852	1.98476	2.50914	1.9164	2.11418	1.20415	2.91625	2.01807	3.38168	1.41239	1.85979	2.51189	2.43007	3.89022	1.90995	1.61122	2.59493	2.91696	1.80811	1.42349	1.51732	3.56286	3.94754	2.58382	2.0703	3.27388	2.00018	2.58952	1.4698	1.02568	2.80553	1.92469	3.24456	1.54212	1.91044	2.48119	1.65016	2.31391	1.41664	1.35783	1.5128	1.96877	2.8468	1.88429	2.48275	1.82953	1.82961
Cell_0235	AMPKARt2	Glucose 17 mM + Glutamine 2.500000e-01 mM + Insulin 10000 ng/ml + EAA 1.000000e-01 X	0.682557	0.701788	0.511674	0.486342	0.346834	0.558812	0.498696	0.521828	0.497908	0.699841	0.429899	0.573809	0.604949	0.615041	0.631568	0.689468	0.733116	0.52715	0.515981	0.509289	0.61216	0.630413	0.423135	0.528829	0.474875	0.573744	0.574624	0.69301	0.718944	0.571089	0.707748	0.492838	0.654339	0.618112	0.633147	0.613979	0.584092	0.526035	0.456803	0.717224	0.403874	0.662284	0.505595	0.689059	0.638571	0.575551	0.579955
Cell_0236	TFEB_TR	Glucose 17 mM + Glutamine 2.500000e-01 mM + Insulin 10000 ng/ml + EAA 1.000000e-01 X	0.768454	0.798723	2.43601	1.44658	0.747562	1.75238	1.75917	1.97562	1.46681	2.37639	1.67368	1.63412	0.895977	2.27124	2.24057	1.06801	1.97427	1.48068	1.90114	1.18371	0.472552	1.72704	1.71605	1.77214	1.66909	1.91279	1.35	1.24422	1.65152	0.697804	1.61688	0.725665	1.72698	1.20259	1.11671	1.369	1.68252	0.843856	1.3445	1.06152	1.51817	1.25699	3.15905	0.958437	1.18731	1.24809	1.51078
Cell_0236	FOXO_TR	Glucose 17 mM + Glutamine 2.500000e-01 mM + Insulin 10000 ng/ml + EAA 1.000000e-01 X	1.15796	1.89688	2.60932	1.82862	2.06526	1.16497	2.99403	2.07575	3.34058	1.74295	1.71424	2.43789	2.2681	3.82235	1.9637	1.56416	2.75092	2.87085	1.73122	1.3085	1.57619	3.64798	3.92216	2.63282	2.06595	3.36059	1.97247	2.53826	1.42573	1.00554	2.87201	2.03015	2.72037	1.51248	1.85951	2.43462	1.669	2.24434	1.38448	1.45791	1.50808	1.97734	3.06569	1.69149	2.55554	1.76164	1.74871
Cell_0236	AMPKARt2	Glucose 17 mM + Glutamine 2.500000e-01 mM + Insulin 10000 ng/ml + EAA 1.000000e-01 X	0.690322	0.691572	0.451409	0.49966	0.347391	0.553515	0.507421	0.536214	0.500254	0.71232	0.39466	0.574047	0.599732	0.613184	0.642778	0.699363	0.729394	0.517478	0.514813	0.524875	0.627377	0.63074	0.427243	0.556731	0.484221	0.575255	0.578713	0.688546	0.713888	0.568478	0.691076	0.481226	0.627214	0.620861	0.628243	0.625263	0.589823	0.524734	0.468457	0.728223	0.429035	0.658478	0.496098	0.692645	0.653401	0.574807	0.580172
Cell_0237	TFEB_TR	Glucose 17 mM + Glutamine 2.500000e-01 mM + Insulin 10000 ng/ml + EAA 1.000000e-01 X	0.76494	0.793595	2.65255	1.43815	0.740495	1.68564	1.12516	2.23813	1.59607	2.61685	1.50716	1.64562	1.04181	2.2266	2.30387	1.156	1.88281	1.47189	1.7807	1.12112	0.468329	2.03947	1.8847	1.57982	1.66584	1.89461	1.42947	1.53544	1.40435	0.672528	1.52846	0.733664	1.63072	1.11086	1.23327	1.44731	1.58481	0.83792	1.36282	1.16657	1.46457	1.32915	3.29809	1.12963	1.59443	1.23685	1.3142
Cell_0237	FOXO_TR	Glucose 17 mM + Glutamine 2.500000e-01 mM + Insulin 10000 ng/ml + EAA 1.000000e-01 X	1.14122	1.82304	2.68564	1.78081	2.06221	1.18653	1.97584	2.12545	3.40725	2.46789	1.63236	2.48312	2.27649	3.79596	1.89657	1.50926	2.70033	2.89679	1.6147	1.27413	1.63675	3.40754	3.78314	2.61363	1.92984	3.37289	1.91164	2.60893	1.34985	0.99654	2.77146	1.96074	2.86128	1.46624	1.89999	2.26758	1.61765	2.16454	1.37712	1.51359	1.55402	1.94966	2.96428	1.60187	2.61669	1.76023	1.64029
Cell_0237	AMPKARt2	Glucose 17 mM + Glutamine 2.500000e-01 mM + Insulin 10000 ng/ml + EAA 1.000000e-01 X	0.683197	0.689194	0.435404	0.496969	0.333149	0.577877	0.644109	0.555129	0.521761	0.707634	0.367057	0.580532	0.600964	0.619913	0.649687	0.70019	0.716151	0.521391	0.505095	0.535324	0.631829	0.62699	0.411766	0.587764	0.489364	0.573017	0.582567	0.706397	0.707845	0.5341	0.687658	0.487816	0.611053	0.629424	0.624103	0.629803	0.579186	0.529848	0.484821	0.729882	0.434902	0.666898	0.481576	0.697576	0.650415	0.567422	0.57864
Cell_0238	TFEB_TR	Glucose 17 mM + Glutamine 2.500000e-01 mM + Insulin 10000 ng/ml + EAA 1.000000e-01 X	0.776215	0.788446	2.64161	1.39069	0.730162	1.64947	1.2354	2.29225	1.56155	2.22942	1.793	1.62333	0.873407	2.28846	2.3673	1.2095	1.55813	1.47363	1.66233	1.10121	0.452337	2.24849	2.05415	1.56441	1.59507	1.92917	1.51335	1.5664	1.40024	0.706362	1.6972	0.74471	1.64853	1.03889	1.33257	1.28127	1.55414	0.8622	1.35795	1.03235	1.40039	1.39653	2.95378	1.16021	1.64461	1.37007	1.45111
Cell_0238	FOXO_TR	Glucose 17 mM + Glutamine 2.500000e-01 mM + Insulin 10000 ng/ml + EAA 1.000000e-01 X	1.11428	1.87066	2.78066	1.75032	2.02483	1.19684	2.02633	2.09607	3.50167	2.96932	1.58181	2.50921	2.39755	3.79501	1.90291	1.527	2.60165	2.83957	1.53884	1.31459	1.60623	3.28239	3.74092	2.48135	1.83712	3.25752	1.91851	2.6612	1.60443	0.960971	2.61538	1.84121	3.09552	1.42985	1.99877	2.09029	1.58046	2.24437	1.34391	1.57269	1.57555	1.91354	2.94631	1.52892	2.57308	1.80878	1.68366
Cell_0238	AMPKARt2	Glucose 17 mM + Glutamine 2.500000e-01 mM + Insulin 10000 ng/ml + EAA 1.000000e-01 X	0.682011	0.689875	0.479447	0.493761	0.320878	0.604786	0.669587	0.554883	0.539384	0.690084	0.347652	0.596012	0.602549	0.62226	0.642561	0.693953	0.717801	0.532936	0.491286	0.534057	0.623808	0.641508	0.42048	0.633527	0.492936	0.571176	0.58001	0.707215	0.710016	0.49784	0.696637	0.50571	0.624695	0.635328	0.623855	0.614	0.56009	0.524403	0.486112	0.725075	0.432614	0.670409	0.500226	0.697601	0.666331	0.57192	0.582469
Cell_0239	TFEB_TR	Glucose 17 mM + Glutamine 2.500000e-01 mM + Insulin 10000 ng/ml + EAA 1.000000e-01 X	0.756442	0.80149	2.57614	1.34753	0.726706	1.62821	1.30228	1.98124	1.67439	1.87456	2.37022	1.61666	0.933599	2.40906	2.49313	1.12871	1.46057	1.57159	1.6887	1.16899	0.451287	1.99253	2.20089	1.82271	1.47452	1.40701	1.31271	1.49888	1.3181	0.808335	1.8581	0.824753	1.64805	1.18905	1.39385	0.90868	1.54385	0.898529	1.37265	0.810634	1.34447	1.57837	2.95957	1.21611	1.3929	1.21249	1.60684
Cell_0239	FOXO_TR	Glucose 17 mM + Glutamine 2.500000e-01 mM + Insulin 10000 ng/ml + EAA 1.000000e-01 X	1.08359	1.92584	2.76387	1.69204	2.12868	1.19776	2.12158	2.03474	3.48555	3.02285	1.531	2.4305	2.43469	3.76865	2.07789	1.52099	2.66432	2.72866	1.5088	1.30274	1.60035	3.27812	3.81209	2.47804	1.84247	1.25248	1.93479	2.56426	2.17092	0.954953	2.69962	1.89475	2.87741	1.38294	2.14389	2.08381	1.59813	2.39499	1.37941	1.66886	1.59256	1.86894	2.95421	1.42815	2.5676	1.82728	1.76345
Cell_0239	AMPKARt2	Glucose 17 mM + Glutamine 2.500000e-01 mM + Insulin 10000 ng/ml + EAA 1.000000e-01 X	0.693995	0.693896	0.508566	0.505817	0.313808	0.609189	0.666904	0.54997	0.526524	0.66604	0.349237	0.59523	0.593873	0.617142	0.638739	0.701857	0.732207	0.531372	0.495066	0.535199	0.615833	0.653453	0.46566	0.682656	0.489275	0.543251	0.574594	0.693919	0.709822	0.478293	0.700302	0.512525	0.644605	0.642099	0.621824	0.605015	0.549372	0.51843	0.482253	0.717515	0.436497	0.661745	0.521848	0.699078	0.673438	0.58429	0.589084
Cell_0240	TFEB_TR	Glucose 17 mM + Glutamine 2.500000e-01 mM + Insulin 10000 ng/ml + EAA 1.000000e-01 X	0.739398	0.78128	2.77694	1.31957	0.743186	1.60982	1.2494	1.90467	1.80375	1.9504	2.10775	1.69351	1.42125	2.38022	2.53925	1.09744	1.45039	1.69658	1.66532	1.16205	0.466192	2.07171	2.14417	1.77257	1.29429	1.04241	1.33341	1.72791	1.02927	0.912075	1.55856	0.855043	1.55443	1.29262	1.42319	1.04871	1.52258	0.913501	1.37526	0.88103	1.31133	1.66811	3.19919	1.27166	1.48541	1.19935	1.47701
Cell_0240	FOXO_TR	Glucose 17 mM + Glutamine 2.500000e-01 mM + Insulin 10000 ng/ml + EAA 1.000000e-01 X	1.10522	1.86418	2.61262	1.65889	2.33308	1.2125	2.17725	2.05576	3.36331	3.01801	1.46879	2.40332	2.41016	3.78993	2.08064	1.48414	2.66267	2.71632	1.44895	1.23505	1.67594	3.10238	3.74029	2.5963	1.74966	1.31867	1.91689	2.46916	2.49717	0.978525	2.81024	1.95649	2.71052	1.36639	2.35156	2.13962	1.5866	2.38462	1.47124	1.67755	1.61906	1.82549	2.84911	1.36936	2.66567	1.84551	1.75215
Cell_0240	AMPKARt2	Glucose 17 mM + Glutamine 2.500000e-01 mM + Insulin 10000 ng/ml + EAA 1.000000e-01 X	0.695139	0.702834	0.502801	0.501418	0.307504	0.594692	0.661265	0.543071	0.515723	0.640803	0.356801	0.579335	0.593722	0.631685	0.643307	0.71119	0.726857	0.523983	0.51445	0.533502	0.619032	0.641881	0.495774	0.680805	0.475065	0.536048	0.571976	0.700444	0.699005	0.466687	0.705658	0.512996	0.649555	0.637098	0.628302	0.621031	0.551538	0.524172	0.487296	0.715891	0.439284	0.650125	0.50873	0.703534	0.654848	0.590288	0.591424
Cell_0241	TFEB_TR	Glucose 17 mM + Glutamine 2.500000e-01 mM + Insulin 10000 ng/ml + EAA 1.000000e-01 X	0.77525	0.769618	2.73037	1.28178	0.735557	1.57988	1.09751	2.18223	1.61876	2.03142	1.47998	1.71504	1.43017	2.2397	2.47384	1.17292	1.47245	1.95632	1.56205	1.1145	0.478795	2.27419	1.92316	1.45106	1.3286	1.21469	1.6875	1.90089	1.08823	1.00055	1.15641	0.797673	1.60909	1.28775	1.24482	1.54958	1.4585	0.918752	1.35458	1.13463	1.30944	1.3716	2.96283	1.06871	1.07146	1.71192	1.44031
Cell_0241	FOXO_TR	Glucose 17 mM + Glutamine 2.500000e-01 mM + Insulin 10000 ng/ml + EAA 1.000000e-01 X	1.14641	1.80974	2.56992	1.67048	2.32558	1.21287	2.14819	2.27612	3.23191	3.15476	1.40116	2.40601	2.39773	3.80588	1.97923	1.42987	2.50611	2.77134	1.38315	1.18083	1.71451	3.03211	3.55309	2.62161	1.59437	1.37946	1.93611	2.47113	2.4532	0.951704	2.61648	1.84217	2.79152	1.38714	2.5435	2.08096	1.49785	2.2908	1.56993	1.57842	1.6876	1.82704	2.81588	1.35934	1.35218	1.9278	1.75101
Cell_0241	AMPKARt2	Glucose 17 mM + Glutamine 2.500000e-01 mM + Insulin 10000 ng/ml + EAA 1.000000e-01 X	0.687304	0.699237	0.489208	0.493389	0.309834	0.587503	0.665787	0.52051	0.546946	0.632989	0.357191	0.577389	0.604954	0.649989	0.650828	0.707045	0.715082	0.516471	0.514198	0.533227	0.626078	0.637633	0.494154	0.650188	0.473089	0.526014	0.573475	0.713855	0.68246	0.477687	0.713849	0.523329	0.643779	0.622499	0.631294	0.636331	0.553882	0.522358	0.492963	0.729178	0.443492	0.650316	0.486768	0.700691	0.64726	0.592894	0.597043
Cell_0242	TFEB_TR	Glucose 17 mM + Glutamine 2.500000e-01 mM + Insulin 10000 ng/ml + EAA 1.000000e-01 X	0.81546	0.808219	2.35408	1.22424	0.711813	1.55926	1.06455	2.2721	1.60437	2.00002	1.58039	1.67095	0.996986	2.17104	2.33013	1.03513	1.65585	2.07631	1.55613	1.07448	0.480021	2.03004	1.73939	1.40946	1.50571	1.47778	1.76464	1.67968	1.29522	1.13102	1.23163	0.798573	1.71154	1.34664	1.13028	1.44459	1.40162	0.956503	1.34631	1.08546	1.37952	1.26236	3.06934	0.948572	1.10418	1.88084	1.72183
Cell_0242	FOXO_TR	Glucose 17 mM + Glutamine 2.500000e-01 mM + Insulin 10000 ng/ml + EAA 1.000000e-01 X	1.17017	1.8259	2.66337	1.6391	2.25232	1.19486	2.14176	2.50343	3.10845	3.21511	1.37557	2.38319	2.41217	3.76538	2.1723	1.34298	2.50097	2.78796	1.33035	1.16531	1.71848	3.2539	3.55526	2.6069	1.51457	1.34407	1.95418	2.47746	2.39018	0.961909	2.40258	1.79078	2.8308	1.33433	2.60856	2.03927	1.444	2.27957	1.6396	1.58049	1.85691	1.85901	2.95424	1.33495	1.4062	1.93812	1.826
Cell_0242	AMPKARt2	Glucose 17 mM + Glutamine 2.500000e-01 mM + Insulin 10000 ng/ml + EAA 1.000000e-01 X	0.691071	0.675166	0.462636	0.506203	0.311307	0.587886	0.666165	0.506858	0.578468	0.638938	0.359844	0.595409	0.606389	0.641553	0.619822	0.70211	0.72015	0.50716	0.504217	0.548137	0.621403	0.647387	0.4891	0.642238	0.481286	0.52323	0.580442	0.713336	0.671212	0.517457	0.713873	0.531143	0.651791	0.633555	0.612683	0.632946	0.541324	0.511522	0.49268	0.738894	0.44546	0.653621	0.485433	0.694987	0.634394	0.58793	0.601023
Cell_0243	TFEB_TR	Glucose 17 mM + Glutamine 2.500000e-01 mM + Insulin 10000 ng/ml + EAA 1.000000e-01 X	0.819946	0.823205	2.39992	1.15899	0.730309	1.58168	1.21131	2.08325	1.85457	2.13692	1.84852	0.782185	1.02032	2.16193	2.3272	0.821225	1.79293	1.55854	1.58581	1.00342	0.466928	1.88529	1.61993	1.54943	1.36644	1.32693	1.57369	1.52507	1.21647	1.31236	1.47641	0.871079	1.60518	1.34638	1.38545	1.03074	1.39979	1.00687	1.36697	0.86496	1.47738	1.62866	3.56978	1.18613	1.11336	1.60979	1.80674
Cell_0243	FOXO_TR	Glucose 17 mM + Glutamine 2.500000e-01 mM + Insulin 10000 ng/ml + EAA 1.000000e-01 X	1.24785	1.82726	2.68549	1.55203	2.33571	1.18696	2.21017	2.47212	2.97134	3.07727	1.3743	1.87847	2.45075	3.75374	2.51533	1.28458	2.64014	2.78533	1.29527	1.15457	1.73784	3.38555	3.61337	2.64625	1.45058	1.27626	1.89398	2.44063	2.38305	1.11013	2.40906	1.93328	2.79833	1.34461	2.54632	2.09972	1.47945	2.27006	1.68112	1.67843	1.99554	1.86733	3.01834	1.3062	1.38433	1.87088	1.84696
Cell_0243	AMPKARt2	Glucose 17 mM + Glutamine 2.500000e-01 mM + Insulin 10000 ng/ml + EAA 1.000000e-01 X	0.694298	0.659569	0.437172	0.5104	0.301873	0.589762	0.663855	0.520918	0.565601	0.632789	0.363466	0.655553	0.609017	0.637682	0.527807	0.695822	0.722921	0.508226	0.519551	0.560864	0.611438	0.647509	0.491917	0.643251	0.473994	0.535405	0.588774	0.706499	0.665846	0.540359	0.711979	0.51818	0.674856	0.653029	0.565665	0.628379	0.516401	0.508745	0.495878	0.731776	0.433431	0.648566	0.480677	0.695047	0.647203	0.578757	0.59894
Cell_0244	TFEB_TR	Glucose 17 mM + Glutamine 2.500000e-01 mM + Insulin 10000 ng/ml + EAA 1.000000e-01 X	0.825381	0.815343	2.81712	1.14045	0.756675	1.61039	1.3132	2.00797	1.82024	2.07638	1.61137	0.845613	1.31628	2.1886	2.56372	0.98763	1.63562	1.23927	1.53978	1.00778	0.462481	2.02357	1.52802	1.57105	1.16241	1.17012	1.48616	1.51826	1.39439	1.40653	1.67116	0.902206	1.46951	1.20168	1.46467	1.16271	1.38297	1.02459	1.39191	0.845191	1.5138	1.71227	3.21078	1.34309	1.16331	1.67243	1.49848
Cell_0244	FOXO_TR	Glucose 17 mM + Glutamine 2.500000e-01 mM + Insulin 10000 ng/ml + EAA 1.000000e-01 X	1.23744	1.80399	2.65013	1.51193	2.3309	1.1795	2.23711	2.3785	2.8904	2.91621	1.34215	1.87609	2.44004	3.78705	2.61377	1.25979	2.64813	2.7938	1.31265	1.16752	1.71976	3.32409	3.51358	2.65688	1.41388	1.29552	1.83508	2.42301	2.35571	1.21506	2.48461	1.96947	2.74879	1.77039	2.40876	2.16214	1.50775	2.23253	1.72309	1.64432	1.9731	1.92418	2.93252	1.27704	1.36073	1.94674	1.76804
Cell_0244	AMPKARt2	Glucose 17 mM + Glutamine 2.500000e-01 mM + Insulin 10000 ng/ml + EAA 1.000000e-01 X	0.688909	0.654261	0.438553	0.495451	0.296254	0.604499	0.663326	0.528548	0.55156	0.618481	0.362236	0.649996	0.625564	0.650436	0.44261	0.682711	0.713375	0.51411	0.542551	0.563572	0.610704	0.649832	0.503285	0.63566	0.46194	0.551243	0.592235	0.697859	0.653243	0.527127	0.710644	0.504799	0.68171	0.620844	0.504245	0.623438	0.515388	0.511986	0.504112	0.734776	0.423364	0.658376	0.461357	0.696753	0.656167	0.589445	0.613823
Cell_0245	TFEB_TR	Glucose 17 mM + Glutamine 2.500000e-01 mM + Insulin 10000 ng/ml + EAA 1.000000e-01 X	0.860881	0.873331	2.85311	1.19762	0.745907	1.55457	1.32013	2.01448	1.69453	1.59152	1.50254	0.784476	1.26646	2.28212	2.53839	1.23041	1.28723	1.80801	1.52784	1.08916	0.486249	1.89961	1.50189	1.54158	1.33751	1.21592	1.45129	1.29608	1.88825	1.31239	1.21115	0.880569	1.60124	1.07646	1.16392	1.42862	1.32732	1.01977	1.39531	0.91663	1.53051	1.56268	2.7242	1.17564	1.22368	1.62031	1.37316
Cell_0245	FOXO_TR	Glucose 17 mM + Glutamine 2.500000e-01 mM + Insulin 10000 ng/ml + EAA 1.000000e-01 X	1.13972	1.7494	2.62269	1.5578	2.13874	1.15315	2.16364	2.43927	2.92852	2.81943	1.32697	1.86384	2.37704	3.76448	2.47877	1.22137	2.62188	2.7784	1.33908	1.24268	1.7082	3.32601	3.52473	2.62829	1.45599	1.32767	1.83777	2.42477	2.394	1.16489	1.13472	1.81521	2.73225	2.45206	2.20418	2.27948	1.50993	2.24404	1.75445	1.52313	1.93503	2.07455	2.95043	1.18866	1.40036	2.0886	1.82019
Cell_0245	AMPKARt2	Glucose 17 mM + Glutamine 2.500000e-01 mM + Insulin 10000 ng/ml + EAA 1.000000e-01 X	0.701977	0.630055	0.439372	0.482774	0.294751	0.615503	0.663239	0.515335	0.566652	0.618853	0.386294	0.647269	0.63518	0.64718	0.422633	0.678121	0.705887	0.509986	0.547232	0.570155	0.603043	0.658125	0.510927	0.630288	0.465053	0.554047	0.595413	0.68675	0.642841	0.518993	0.395296	0.516726	0.672916	0.561062	0.474971	0.607818	0.541445	0.522108	0.504349	0.747201	0.436218	0.685164	0.457639	0.701149	0.652743	0.600635	0.637774
Cell_0246	TFEB_TR	Glucose 17 mM + Glutamine 2.500000e-01 mM + Insulin 10000 ng/ml + EAA 1.000000e-01 X	0.94409	0.998975	2.62416	1.23405	0.733564	1.4316	1.37235	1.8861	1.79127	1.42364	1.87158	0.782159	1.19344	2.37734	2.28475	1.08122	1.10803	2.13319	1.54512	1.12206	0.499314	1.80608	1.50566	1.48686	1.41475	1.10068	1.45196	1.49692	1.86832	1.21841	1.15084	0.853253	1.78207	1.0093	1.20575	1.30477	1.27612	1.00642	1.4188	0.997585	1.56504	1.73908	3.12475	1.09573	1.17257	1.25068	1.61208
Cell_0246	FOXO_TR	Glucose 17 mM + Glutamine 2.500000e-01 mM + Insulin 10000 ng/ml + EAA 1.000000e-01 X	1.53068	1.64117	2.54346	1.59724	2.00723	1.15059	2.10009	2.52498	3.03027	2.70555	1.33446	1.86896	2.40887	3.63352	2.31839	1.18853	2.6847	2.73447	1.31931	1.22354	1.75049	3.3708	3.62611	2.61351	1.44838	1.29909	1.81569	2.36197	2.46631	1.14689	1.12016	1.75586	2.82967	2.81997	1.96953	2.39363	1.54099	2.23433	1.81414	1.50131	1.94317	2.14819	3.07519	1.11144	1.38164	2.0399	2.05099
Cell_0246	AMPKARt2	Glucose 17 mM + Glutamine 2.500000e-01 mM + Insulin 10000 ng/ml + EAA 1.000000e-01 X	0.707753	0.61411	0.418025	0.472594	0.289765	0.601032	0.665618	0.510478	0.575475	0.629109	0.461169	0.650218	0.640066	0.647779	0.44115	0.677815	0.706857	0.506487	0.548482	0.579793	0.565462	0.649839	0.498464	0.623213	0.470985	0.549735	0.60316	0.682562	0.653466	0.526906	0.406379	0.542386	0.679232	0.537478	0.479382	0.602036	0.541371	0.539819	0.499822	0.728681	0.455585	0.688511	0.46629	0.711869	0.655229	0.58191	0.635618
Cell_0247	TFEB_TR	Glucose 17 mM + Glutamine 2.500000e-01 mM + Insulin 10000 ng/ml + EAA 1.000000e-01 X	1.08907	1.14656	2.68772	1.18078	0.728247	1.37299	1.46731	1.8952	1.76622	1.68307	2.1275	0.786799	1.41106	2.4373	2.37339	0.89891	1.27138	1.7616	1.4558	1.11467	0.472811	2.14244	1.47898	1.43045	1.07065	1.11443	1.54347	2.3395	1.40328	1.28841	1.15848	0.842172	1.67044	1.03498	1.48176	1.11206	1.22397	0.978702	1.4602	1.04826	1.55204	1.73442	3.23795	1.21089	1.05988	1.38377	1.75142
Cell_0247	FOXO_TR	Glucose 17 mM + Glutamine 2.500000e-01 mM + Insulin 10000 ng/ml + EAA 1.000000e-01 X	2.43384	1.55262	2.4982	1.54801	2.03244	1.19148	2.12196	2.57292	3.10387	2.64527	1.28777	1.88454	2.5126	3.47706	2.19727	1.16359	2.63991	2.70756	1.29336	1.12168	1.72337	3.41328	3.51815	2.5836	1.38925	1.26975	1.76292	2.26986	2.43391	1.20363	1.10804	1.84475	2.85247	2.80825	1.79808	2.30762	1.57358	2.19029	1.84319	1.50748	1.87562	2.09771	3.05251	1.12875	1.2828	1.87877	2.15145
Cell_0247	AMPKARt2	Glucose 17 mM + Glutamine 2.500000e-01 mM + Insulin 10000 ng/ml + EAA 1.000000e-01 X	0.640906	0.634159	0.407226	0.470263	0.292354	0.58408	0.666896	0.511817	0.573145	0.630344	0.544732	0.658728	0.655877	0.674166	0.450079	0.666023	0.714691	0.511695	0.557534	0.593414	0.521539	0.63553	0.493066	0.613544	0.469986	0.553952	0.607234	0.690379	0.66023	0.520526	0.405558	0.557035	0.702207	0.53348	0.472913	0.608245	0.516434	0.544522	0.503772	0.691142	0.459257	0.672394	0.462579	0.714516	0.659837	0.566904	0.625425
Cell_0248	TFEB_TR	Glucose 17 mM + Glutamine 2.500000e-01 mM + Insulin 10000 ng/ml + EAA 1.000000e-01 X	1.26522	1.29882	2.73811	1.13051	0.722233	1.36919	1.50403	2.11299	1.49603	1.60972	2.01074	0.677693	1.4525	2.43958	2.41491	1.02936	1.42309	1.82162	1.41204	1.07115	0.449135	2.33972	1.47293	1.45412	0.954955	1.49289	1.50887	2.44821	1.23533	1.38795	1.18009	0.807143	1.62913	1.20695	1.30694	1.26425	1.17767	0.946426	1.45098	0.89322	1.51187	1.45094	2.76293	1.21617	1.02784	1.72481	1.639
Cell_0248	FOXO_TR	Glucose 17 mM + Glutamine 2.500000e-01 mM + Insulin 10000 ng/ml + EAA 1.000000e-01 X	2.9949	1.50639	2.56275	1.46502	2.11412	1.21533	2.1837	2.60161	3.09117	2.69549	1.2416	1.88904	2.51745	3.38469	2.12232	1.12629	2.48979	2.71453	1.30113	1.40066	1.60137	3.54785	3.43629	2.55671	1.41111	1.25993	1.74701	2.25851	2.33959	1.21312	1.12055	1.85093	2.64575	2.77237	1.67897	2.17232	1.56523	2.21212	1.74523	1.43231	1.80127	2.11832	2.94092	1.12069	1.28697	1.82446	2.10258
Cell_0248	AMPKARt2	Glucose 17 mM + Glutamine 2.500000e-01 mM + Insulin 10000 ng/ml + EAA 1.000000e-01 X	0.554621	0.642119	0.41178	0.483245	0.301278	0.587182	0.668163	0.501443	0.579754	0.62648	0.579164	0.665004	0.656383	0.684102	0.44266	0.660052	0.717107	0.517042	0.561968	0.597687	0.507938	0.637945	0.51227	0.61289	0.465354	0.558313	0.599928	0.699687	0.645351	0.508608	0.418695	0.559479	0.721282	0.523816	0.480767	0.600279	0.51206	0.537429	0.511892	0.676225	0.458788	0.671821	0.460974	0.702575	0.666734	0.574253	0.635414
Cell_0249	TFEB_TR	Glucose 17 mM + Glutamine 2.500000e-01 mM + Insulin 10000 ng/ml + EAA 1.000000e-01 X	1.43158	1.45332	2.32972	1.14097	0.733724	1.30167	1.4575	2.13826	1.25952	1.42996	1.82012	0.681557	1.25235	2.33865	2.10642	1.1921	0.774596	2.34956	1.54733	1.01967	0.455149	2.21828	1.50027	1.47615	1.26376	1.50682	1.23494	1.73774	1.37543	1.45125	1.16118	0.711282	1.8732	1.33431	1.08421	1.83194	1.15695	0.923424	1.51396	0.864906	1.51088	1.60799	2.72766	1.24884	1.04338	1.722	1.54845
Cell_0249	FOXO_TR	Glucose 17 mM + Glutamine 2.500000e-01 mM + Insulin 10000 ng/ml + EAA 1.000000e-01 X	3.04884	1.45112	2.61274	1.44564	2.10903	1.16645	2.25682	2.59465	3.03434	2.68955	1.26226	1.88641	2.5008	3.33625	2.14429	1.10116	1.9234	2.7384	1.3235	2.06363	1.49976	3.62034	3.51393	2.58712	1.4165	1.26569	1.67341	2.33985	2.29625	1.23836	1.1471	1.72784	2.48643	2.77639	1.50752	2.17072	1.53679	2.2367	1.95179	1.34457	1.80163	2.23722	2.9984	1.07073	1.38392	1.88676	2.1211
Cell_0249	AMPKARt2	Glucose 17 mM + Glutamine 2.500000e-01 mM + Insulin 10000 ng/ml + EAA 1.000000e-01 X	0.548537	0.623865	0.399286	0.488175	0.304638	0.599326	0.670478	0.505111	0.575934	0.634001	0.567605	0.664164	0.629679	0.668487	0.448279	0.668959	0.635895	0.52113	0.55583	0.566903	0.498149	0.650588	0.514848	0.611208	0.457296	0.555268	0.590774	0.700877	0.63646	0.520129	0.431936	0.565846	0.726163	0.529814	0.537995	0.58969	0.518241	0.538588	0.514214	0.671387	0.464616	0.674162	0.469938	0.697327	0.676488	0.571446	0.642419
Cell_0250	TFEB_TR	Glucose 17 mM + Glutamine 2.500000e-01 mM + Insulin 10000 ng/ml + EAA 1.000000e-01 X	1.54563	1.62203	1.89804	1.1452	0.731378	1.23383	1.43735	2.11864	1.24044	1.65191	1.79534	0.824564	1.31898	2.28162	2.08893	1.2193	0.997854	2.25932	1.62076	1.06756	0.462579	2.23183	1.50752	1.51216	1.30258	1.05551	1.04504	1.61078	1.49003	1.51076	1.17589	0.666082	1.80601	1.29051	1.23892	1.96397	1.1484	0.920927	1.78136	1.23447	1.50884	1.79577	2.86775	1.38664	1.04731	1.7752	1.51943
Cell_0250	FOXO_TR	Glucose 17 mM + Glutamine 2.500000e-01 mM + Insulin 10000 ng/ml + EAA 1.000000e-01 X	3.14137	1.41899	2.58745	1.47153	2.01448	1.06561	2.31838	2.62577	3.0634	2.61229	1.27097	1.87666	2.59376	3.31391	2.24471	1.11731	1.98995	2.78299	1.33638	2.42946	1.44119	3.54591	3.46667	2.59777	1.36297	1.342	1.64544	2.46561	2.2943	1.30752	1.16545	1.65865	2.5705	2.73234	1.33912	2.18607	1.53784	2.21406	2.7166	1.27577	1.74961	2.31077	3.14482	1.10539	1.4162	1.95772	2.11169
Cell_0250	AMPKARt2	Glucose 17 mM + Glutamine 2.500000e-01 mM + Insulin 10000 ng/ml + EAA 1.000000e-01 X	0.578209	0.625341	0.393691	0.47792	0.304999	0.60973	0.64871	0.531062	0.555755	0.644359	0.554165	0.667214	0.619183	0.66598	0.461407	0.672946	0.640173	0.527168	0.547896	0.538178	0.454453	0.657582	0.484953	0.59958	0.455515	0.561489	0.597835	0.698051	0.633659	0.541126	0.41646	0.572874	0.722961	0.538616	0.585036	0.593885	0.503922	0.532877	0.499288	0.650839	0.462296	0.666225	0.470914	0.69843	0.676531	0.56477	0.63214
Cell_0251	TFEB_TR	Glucose 17 mM + Glutamine 2.500000e-01 mM + Insulin 10000 ng/ml + EAA 1.000000e-01 X	1.58407	1.80174	1.91367	1.12141	0.70328	1.26845	1.4811	2.34857	1.38488	1.76553	1.98255	0.858583	1.49966	2.41805	2.26863	1.22457	1.15937	1.66953	1.61623	1.15744	0.469434	2.27379	1.52768	1.62223	1.00501	1.01685	1.20908	1.90354	1.57536	1.47471	1.2274	0.712547	1.57693	1.15694	1.3414	0.526662	1.15818	0.942615	2.03693	1.37832	1.47635	1.4872	2.72094	1.24942	1.10397	1.76577	1.41036
Cell_0251	FOXO_TR	Glucose 17 mM + Glutamine 2.500000e-01 mM + Insulin 10000 ng/ml + EAA 1.000000e-01 X	3.2303	1.41683	2.54648	1.46881	2.06031	1.11674	2.28277	2.68097	3.11882	2.63332	1.2721	1.8799	2.65885	3.34523	2.31955	1.17028	2.08143	2.82607	1.33787	2.3922	1.42906	3.51419	3.40032	2.54055	1.38141	1.45338	2.07837	2.53905	2.28871	1.28422	1.18014	1.67348	2.70804	2.73789	1.31543	1.19942	1.58209	2.265	3.22244	1.21252	1.63976	2.31723	3.11566	1.1294	1.40788	1.99652	2.06725
Cell_0251	AMPKARt2	Glucose 17 mM + Glutamine 2.500000e-01 mM + Insulin 10000 ng/ml + EAA 1.000000e-01 X	0.568091	0.636024	0.421444	0.476122	0.302738	0.620062	0.588839	0.532615	0.556586	0.634442	0.560059	0.677768	0.638034	0.674998	0.450596	0.670724	0.650012	0.527653	0.548567	0.553137	0.415811	0.656209	0.458919	0.594894	0.461901	0.57394	0.618758	0.694659	0.616848	0.552017	0.406894	0.567189	0.718807	0.526084	0.581731	0.669848	0.469323	0.516255	0.46391	0.626914	0.454604	0.666314	0.470693	0.689033	0.678193	0.578014	0.622861
Cell_0252	TFEB_TR	Glucose 17 mM + Glutamine 2.500000e-01 mM + Insulin 10000 ng/ml + EAA 1.000000e-01 X	1.60607	1.96457	2.17783	1.11909	0.704224	1.33428	1.46206	2.40741	1.53212	1.67601	2.128	0.829469	1.34355	2.53145	2.07693	1.20004	0.992126	1.53265	1.76314	1.1904	0.501281	2.15979	1.57591	1.6556	0.95234	1.43967	1.3832	1.86814	1.67342	1.38113	1.19184	0.696844	1.87888	1.10143	1.28056	0.465957	1.15767	0.977602	2.10502	1.08194	1.44738	1.53969	2.57339	1.0524	1.16353	1.54715	1.33919
Cell_0252	FOXO_TR	Glucose 17 mM + Glutamine 2.500000e-01 mM + Insulin 10000 ng/ml + EAA 1.000000e-01 X	3.07543	1.38537	2.53654	1.46779	2.22776	1.4917	2.15042	2.6989	3.00436	2.69007	1.32683	1.91557	2.61953	3.38821	2.35678	1.19811	2.13233	2.82097	1.32481	2.43061	1.47303	3.53694	3.45685	2.52612	1.33689	1.45963	2.66596	2.54097	2.27775	1.19392	1.18763	1.6553	2.75738	2.79032	1.36901	1.10769	1.62148	2.38366	3.05252	1.19986	1.5945	2.32442	2.98123	1.07906	1.4222	2.05281	2.19524
Cell_0252	AMPKARt2	Glucose 17 mM + Glutamine 2.500000e-01 mM + Insulin 10000 ng/ml + EAA 1.000000e-01 X	0.547909	0.628832	0.439145	0.48696	0.294189	0.618667	0.531701	0.501525	0.581696	0.616303	0.564951	0.678691	0.636149	0.671889	0.443353	0.672077	0.654285	0.517421	0.564506	0.56769	0.417524	0.656351	0.453467	0.603661	0.465965	0.562098	0.628634	0.685345	0.598949	0.559756	0.422584	0.56136	0.707409	0.517303	0.573788	0.658253	0.44412	0.523799	0.437363	0.61375	0.458968	0.671658	0.481491	0.690781	0.685864	0.586218	0.623147
Cell_0253	TFEB_TR	Glucose 17 mM + Glutamine 2.500000e-01 mM + Insulin 10000 ng/ml + EAA 1.000000e-01 X	1.64062	2.05854	1.15969	1.15441	0.711416	1.40916	1.41512	2.20493	1.66703	1.76081	2.08679	0.884022	1.08824	2.41039	1.88667	1.11663	0.874221	1.70718	1.82851	1.20864	0.545831	2.10324	1.6117	1.59723	1.05476	1.5573	1.23589	1.88999	1.74854	1.3818	1.10312	0.651775	2.10356	1.23057	1.21992	0.490004	1.09347	1.01846	2.13112	0.982865	1.42732	2.07297	2.5103	1.24665	1.09052	1.66651	1.3485
Cell_0253	FOXO_TR	Glucose 17 mM + Glutamine 2.500000e-01 mM + Insulin 10000 ng/ml + EAA 1.000000e-01 X	2.9411	1.34702	2.02447	1.53805	2.21736	1.91448	2.0153	2.76736	2.83422	2.62724	1.33035	1.95158	2.63525	3.36496	2.44268	1.142	2.1695	2.8075	1.29348	2.54598	1.49499	3.60127	3.42004	2.56074	1.28427	1.35409	2.50012	2.60314	2.26115	1.19366	1.17603	1.64366	2.76882	2.75007	1.37704	1.15111	1.6588	2.4114	2.92959	1.20508	1.59557	2.3899	2.96491	1.07293	1.42946	2.13237	2.33853
Cell_0253	AMPKARt2	Glucose 17 mM + Glutamine 2.500000e-01 mM + Insulin 10000 ng/ml + EAA 1.000000e-01 X	0.541238	0.62844	0.670618	0.493106	0.292064	0.576327	0.517065	0.487777	0.588921	0.6177	0.559625	0.669136	0.605184	0.657816	0.459596	0.678508	0.648015	0.515342	0.589879	0.553386	0.42433	0.657148	0.450479	0.615925	0.482984	0.521242	0.620039	0.672152	0.591031	0.559066	0.426813	0.562979	0.69854	0.524439	0.580116	0.654496	0.457658	0.544451	0.440954	0.605928	0.464337	0.668883	0.48737	0.706839	0.671077	0.576292	0.628878
Cell_0254	TFEB_TR	Glucose 17 mM + Glutamine 2.500000e-01 mM + Insulin 10000 ng/ml + EAA 1.000000e-01 X	1.64234	2.01308	1.1802	1.18219	0.674011	1.54311	1.53023	2.23322	1.65707	1.6945	2.23955	0.962827	1.14738	2.28798	2.07591	1.07417	0.984348	1.51292	1.60749	1.20073	0.580894	2.17577	1.68222	1.52587	0.977171	1.24254	1.16148	1.92071	1.74415	1.45083	1.09604	0.71817	1.77019	1.16975	1.15318	0.499655	1.04403	1.05805	2.18098	1.04303	1.41083	2.11042	2.69853	1.3935	0.973425	1.85261	1.35756
Cell_0254	FOXO_TR	Glucose 17 mM + Glutamine 2.500000e-01 mM + Insulin 10000 ng/ml + EAA 1.000000e-01 X	2.96999	1.30697	2.03276	1.60907	2.09659	2.0897	1.88593	2.85701	2.83821	2.53695	1.28095	1.98923	2.72237	3.30952	2.56691	1.06892	2.18273	2.80832	1.2746	2.52636	1.48275	3.71537	3.38255	2.54724	1.74845	1.28144	1.77209	2.6771	2.23743	1.27118	1.15725	1.65032	2.79494	2.68962	1.39611	1.16336	1.74809	2.30905	3.04771	1.18437	1.59876	2.46819	2.98072	1.02918	1.42179	2.15302	2.29731
Cell_0254	AMPKARt2	Glucose 17 mM + Glutamine 2.500000e-01 mM + Insulin 10000 ng/ml + EAA 1.000000e-01 X	0.532971	0.633535	0.66911	0.483687	0.31159	0.49911	0.522407	0.502299	0.574538	0.625105	0.563255	0.666386	0.606014	0.644444	0.460869	0.691145	0.644846	0.535003	0.598858	0.545849	0.41794	0.651285	0.438768	0.631227	0.51238	0.480413	0.611841	0.669001	0.596131	0.548696	0.421145	0.558877	0.712598	0.526098	0.575706	0.658017	0.481826	0.545553	0.456262	0.602889	0.460799	0.662128	0.484273	0.706315	0.637588	0.577911	0.631387
Cell_0255	TFEB_TR	Glucose 17 mM + Glutamine 2.500000e-01 mM + Insulin 10000 ng/ml + EAA 1.000000e-01 X	1.64049	1.87872	1.20285	1.15705	0.657691	1.66928	1.87828	2.35722	1.31527	1.66742	2.61978	0.961935	1.41453	2.35669	2.36647	1.14445	0.88833	1.38496	1.47296	1.18019	0.612179	1.2736	1.7943	1.40727	1.00584	0.988864	1.3449	1.50737	1.59449	1.47481	1.14555	0.768658	1.77245	0.864101	1.29964	0.47973	1.08936	1.09277	2.19481	0.888501	1.38523	1.92584	2.84763	1.20578	0.978985	1.59412	1.50192
Cell_0255	FOXO_TR	Glucose 17 mM + Glutamine 2.500000e-01 mM + Insulin 10000 ng/ml + EAA 1.000000e-01 X	2.98488	1.22395	2.03877	1.57745	2.09938	2.16071	1.776	2.83411	2.9362	2.54365	1.31761	2.05634	2.70661	3.31255	2.62546	1.06968	2.0548	2.73141	1.27972	2.46003	1.50537	1.4723	3.4993	2.55384	2.57695	1.30003	1.48173	2.63622	2.22079	1.27652	1.15428	1.59155	2.829	2.72328	1.45751	1.13043	1.80936	2.18284	3.03794	1.19157	1.60532	2.43902	2.90013	0.98889	1.41321	2.12646	2.25424
Cell_0255	AMPKARt2	Glucose 17 mM + Glutamine 2.500000e-01 mM + Insulin 10000 ng/ml + EAA 1.000000e-01 X	0.535681	0.629325	0.667013	0.474935	0.340594	0.451244	0.51458	0.508296	0.571919	0.617482	0.568055	0.668261	0.641698	0.639553	0.452197	0.695074	0.651422	0.551786	0.583233	0.545099	0.420135	0.621937	0.432303	0.645803	0.513109	0.454962	0.60916	0.677826	0.618073	0.556707	0.42959	0.553967	0.726515	0.522477	0.572603	0.667227	0.473387	0.555001	0.469217	0.613713	0.462357	0.661144	0.483928	0.708879	0.610123	0.5935	0.627706
Cell_0256	TFEB_TR	Glucose 17 mM + Glutamine 2.500000e-01 mM + Insulin 10000 ng/ml + EAA 1.000000e-01 X	1.66586	1.78471	1.2264	1.12868	0.704759	1.75995	2.23864	2.17078	1.07143	2.06061	2.62399	0.830056	1.55007	2.39197	2.58639	1.22996	0.812439	1.8309	1.54988	1.35191	0.646826	1.23072	1.86232	1.36558	1.24004	1.02341	1.31839	1.15033	1.41323	1.43599	1.15853	0.727684	2.11256	1.09214	1.55449	0.499792	1.14206	1.12132	2.23995	0.916098	1.32657	2.027	2.34001	1.18287	1.06859	1.44683	1.55991
Cell_0256	FOXO_TR	Glucose 17 mM + Glutamine 2.500000e-01 mM + Insulin 10000 ng/ml + EAA 1.000000e-01 X	3.0141	1.16561	2.09643	1.53587	2.12362	2.19362	1.73955	2.77259	3.02121	2.58919	1.29803	2.08993	2.60972	3.32887	2.65346	1.10126	1.8853	2.60577	1.24996	2.40882	1.55108	1.46559	3.50687	2.61646	2.96707	1.32865	1.68189	2.61853	2.22868	1.24132	1.17013	1.62472	2.82235	2.7678	1.47756	1.16565	1.74581	2.11782	3.0882	1.1891	1.57061	2.39152	2.84991	1.27671	1.40319	2.15334	2.30006
Cell_0256	AMPKARt2	Glucose 17 mM + Glutamine 2.500000e-01 mM + Insulin 10000 ng/ml + EAA 1.000000e-01 X	0.544658	0.64785	0.672044	0.490535	0.352559	0.466697	0.507864	0.499126	0.575872	0.60767	0.569945	0.66267	0.649569	0.639743	0.458827	0.686127	0.652809	0.550205	0.575972	0.528817	0.446008	0.631195	0.433878	0.644007	0.493238	0.430091	0.599273	0.678635	0.631441	0.577043	0.430016	0.553966	0.711376	0.525932	0.589241	0.681314	0.45618	0.578412	0.479576	0.630623	0.461907	0.671092	0.480925	0.718312	0.587474	0.599231	0.629256
Cell_0257	TFEB_TR	Glucose 17 mM + Glutamine 2.500000e-01 mM + Insulin 10000 ng/ml + EAA 1.000000e-01 X	1.63945	1.67436	1.25364	1.16936	0.748883	1.87158	2.23348	1.92617	1.28451	1.92815	2.2339	0.700674	1.61464	2.30437	2.65121	1.23256	1.02027	2.07165	1.55021	1.69495	0.680738	1.16408	1.89173	1.42386	1.24638	1.15514	1.18695	1.28326	1.32815	1.46792	1.11512	0.743263	1.9352	1.5723	1.43742	0.510202	1.15058	1.12152	2.35076	1.24162	0.569312	1.95642	2.01165	1.31991	1.14835	1.61305	1.27102
Cell_0257	FOXO_TR	Glucose 17 mM + Glutamine 2.500000e-01 mM + Insulin 10000 ng/ml + EAA 1.000000e-01 X	3.10339	1.15951	2.18463	1.61202	2.09221	2.13793	1.70148	2.73847	3.09484	2.59683	1.23262	2.04288	2.59815	3.29052	2.77309	1.11543	1.85596	2.59639	1.18233	2.37834	1.60156	1.43096	3.35085	2.58802	2.88118	1.30408	1.82039	2.64987	2.25532	1.32241	1.19112	1.80507	2.78272	2.7805	1.44197	1.18071	1.67401	2.10455	3.24671	1.13202	0.86843	2.46531	2.84394	1.70818	1.36946	2.18351	2.33777
Cell_0257	AMPKARt2	Glucose 17 mM + Glutamine 2.500000e-01 mM + Insulin 10000 ng/ml + EAA 1.000000e-01 X	0.533726	0.68393	0.679933	0.506148	0.341491	0.502376	0.518549	0.498332	0.563363	0.598676	0.593136	0.650152	0.638016	0.635827	0.461068	0.689809	0.64848	0.550999	0.58445	0.516177	0.503665	0.634108	0.429752	0.630778	0.492426	0.407231	0.586332	0.665863	0.621908	0.571273	0.409467	0.552261	0.686505	0.532762	0.604879	0.684151	0.466692	0.570534	0.475417	0.629622	0.595295	0.675547	0.480666	0.689033	0.576523	0.600109	0.634751
Cell_0258	TFEB_TR	Glucose 17 mM + Glutamine 2.500000e-01 mM + Insulin 10000 ng/ml + EAA 1.000000e-01 X	1.56321	1.50871	1.28327	1.21595	0.769963	1.94647	2.01469	2.01367	1.45804	1.39494	2.20666	0.767293	1.77497	2.29218	2.55644	1.20989	1.0436	1.7813	1.51071	1.8337	0.690551	1.21281	1.90136	1.39723	1.07081	1.15961	1.40812	1.48421	1.30201	1.57377	1.0577	0.776274	1.65086	1.31623	1.10009	0.494616	1.17831	1.09684	2.39568	1.27056	0.565281	1.93159	2.44839	1.18784	1.21162	1.5149	1.15586
Cell_0258	FOXO_TR	Glucose 17 mM + Glutamine 2.500000e-01 mM + Insulin 10000 ng/ml + EAA 1.000000e-01 X	3.0772	1.12174	2.22012	1.6965	2.12088	2.18176	1.62541	2.64091	3.06525	2.55165	1.62035	1.98044	2.6366	3.29852	2.89506	1.13659	1.85528	2.68081	1.16462	2.43338	1.65513	1.42367	3.28415	2.48155	2.82207	1.25349	1.85103	2.56265	2.25224	1.36932	1.21383	1.81768	2.78678	2.77688	1.37564	1.14594	1.70727	2.11786	3.16442	1.13827	0.877861	2.49585	2.75001	1.85023	1.28166	2.11782	2.35646
Cell_0258	AMPKARt2	Glucose 17 mM + Glutamine 2.500000e-01 mM + Insulin 10000 ng/ml + EAA 1.000000e-01 X	0.519241	0.687255	0.677395	0.495474	0.321012	0.527671	0.536299	0.507712	0.547371	0.582992	0.590155	0.638191	0.652001	0.629409	0.461058	0.698698	0.66171	0.559447	0.57609	0.51961	0.568017	0.644806	0.44026	0.634142	0.496175	0.406452	0.585284	0.66144	0.614875	0.556623	0.39175	0.561319	0.678532	0.539029	0.620007	0.666467	0.477724	0.549556	0.455155	0.617783	0.588149	0.662307	0.498732	0.662383	0.574712	0.604801	0.63154
Cell_0259	TFEB_TR	Glucose 17 mM + Glutamine 2.500000e-01 mM + Insulin 10000 ng/ml + EAA 1.000000e-01 X	1.56998	1.49018	1.28769	1.19245	0.78367	1.92543	1.94305	0.550412	1.38695	1.88358	2.55074	0.9471	1.68902	2.34367	2.66996	1.17694	0.897262	1.80049	1.54322	1.74607	0.658856	1.34574	1.85406	1.42385	1.13171	1.11345	1.59464	1.45149	1.30258	1.57525	1.0414	0.719895	1.75728	1.0233	0.963233	0.511885	1.23426	1.08255	2.31015	0.951829	0.597752	2.04392	2.48728	0.978543	1.25702	1.35328	1.33097
Cell_0259	FOXO_TR	Glucose 17 mM + Glutamine 2.500000e-01 mM + Insulin 10000 ng/ml + EAA 1.000000e-01 X	2.96971	1.08374	2.19978	1.65871	2.16246	2.30638	1.60632	1.30439	2.95746	2.49142	2.34208	1.93309	2.64981	3.38456	2.86999	1.1417	1.76526	2.70781	1.19669	2.53783	1.65399	1.431	3.33512	2.4475	2.85138	1.23387	1.90029	2.46553	2.19535	1.37211	1.22502	1.66433	2.8458	2.73297	1.29888	1.15403	1.77642	2.13996	3.00197	1.19965	0.921669	2.39105	2.67025	1.86865	1.17139	2.06301	2.33875
Cell_0259	AMPKARt2	Glucose 17 mM + Glutamine 2.500000e-01 mM + Insulin 10000 ng/ml + EAA 1.000000e-01 X	0.521468	0.666868	0.668384	0.491171	0.313397	0.552896	0.564044	0.463861	0.546036	0.58457	0.5071	0.632746	0.658171	0.626058	0.47089	0.694399	0.673219	0.561678	0.561534	0.521113	0.593845	0.657978	0.474504	0.650896	0.48837	0.405766	0.592734	0.668206	0.617085	0.57362	0.386215	0.578834	0.690217	0.542011	0.638904	0.655052	0.450645	0.554385	0.444868	0.631601	0.586863	0.655149	0.503577	0.690404	0.552144	0.59941	0.625008
Cell_0260	TFEB_TR	Glucose 17 mM + Glutamine 2.500000e-01 mM + Insulin 10000 ng/ml + EAA 1.000000e-01 X	1.63384	1.57828	1.25045	1.16872	0.755145	1.89546	1.80806	0.626818	1.48384	2.50743	2.44799	1.15626	1.31616	2.34036	2.89244	1.17494	0.937237	2.05852	1.50837	1.79987	0.622574	1.31755	1.77553	1.60564	1.24382	1.26041	1.42083	1.25346	1.2222	1.75472	1.04832	0.712044	1.86965	1.34273	1.10129	0.517296	1.2852	1.0703	2.2391	0.810888	0.614614	1.66868	2.10922	0.977802	1.3065	1.64677	1.29749
Cell_0260	FOXO_TR	Glucose 17 mM + Glutamine 2.500000e-01 mM + Insulin 10000 ng/ml + EAA 1.000000e-01 X	2.94207	1.09708	2.17506	1.62182	2.10919	2.30955	1.61424	1.41613	2.9217	2.51186	2.60963	1.87274	2.71159	3.41185	2.76603	1.13734	1.72431	2.68344	1.19506	2.61931	1.61457	1.40959	3.43153	2.46455	2.85938	1.2466	1.91319	2.48317	2.13795	1.9063	1.19351	1.67563	2.87986	2.71827	1.27342	1.15658	1.83511	2.13067	3.05846	1.1729	0.933037	2.35769	2.7094	1.96241	1.09401	2.09536	2.31263
Cell_0260	AMPKARt2	Glucose 17 mM + Glutamine 2.500000e-01 mM + Insulin 10000 ng/ml + EAA 1.000000e-01 X	0.52389	0.661547	0.667199	0.502068	0.332126	0.561283	0.605798	0.467815	0.554457	0.613078	0.425629	0.630469	0.630913	0.62724	0.470347	0.69978	0.64155	0.560853	0.567644	0.514658	0.588725	0.653195	0.486177	0.646685	0.48186	0.391224	0.599092	0.670388	0.618408	0.594662	0.388134	0.571818	0.700982	0.533352	0.619249	0.667497	0.41841	0.551883	0.457212	0.664673	0.597021	0.661083	0.471463	0.705859	0.521445	0.587987	0.624486
Cell_0261	TFEB_TR	Glucose 17 mM + Glutamine 2.500000e-01 mM + Insulin 10000 ng/ml + EAA 1.000000e-01 X	1.59912	1.47942	1.21936	1.19428	0.702463	1.91617	1.67718	0.609375	1.58271	2.03667	2.21113	1.36537	1.20821	2.3123	2.66108	1.31372	0.947469	1.83284	1.48069	1.95842	0.602853	1.15934	1.68246	1.61301	1.15078	1.46522	1.4289	1.1183	1.14625	2.35647	1.05385	0.804027	2.00728	1.30934	1.42442	0.481036	1.31323	1.06003	2.2962	0.991277	0.613107	1.52035	2.33444	1.04211	1.37389	1.88018	1.25765
Cell_0261	FOXO_TR	Glucose 17 mM + Glutamine 2.500000e-01 mM + Insulin 10000 ng/ml + EAA 1.000000e-01 X	2.88204	1.10663	2.18338	1.69346	2.03996	2.33336	1.58371	1.41217	2.95676	2.57871	2.45071	1.80352	2.77259	3.38859	2.67706	1.15721	1.75876	2.67414	1.16485	2.66729	1.59255	1.41108	3.51108	2.46178	2.87416	1.24034	1.06806	2.4249	2.12108	2.883	1.14323	1.78885	2.81236	2.75623	1.27737	1.10432	1.88349	2.11896	3.14103	1.12464	0.920716	2.44222	2.70316	1.99191	1.04277	2.09067	2.34834
Cell_0261	AMPKARt2	Glucose 17 mM + Glutamine 2.500000e-01 mM + Insulin 10000 ng/ml + EAA 1.000000e-01 X	0.517082	0.671638	0.675195	0.498657	0.352552	0.537672	0.639675	0.478652	0.559486	0.637714	0.414535	0.625298	0.622331	0.631579	0.463878	0.710317	0.597388	0.560384	0.568768	0.512379	0.585341	0.645153	0.47703	0.634962	0.477544	0.422563	0.527808	0.673231	0.622844	0.568854	0.393421	0.551095	0.688247	0.523677	0.586867	0.680484	0.429981	0.530455	0.465741	0.67751	0.600488	0.66065	0.456022	0.681448	0.515042	0.591673	0.628328
Cell_0262	TFEB_TR	Glucose 17 mM + Glutamine 2.500000e-01 mM + Insulin 10000 ng/ml + EAA 1.000000e-01 X	1.55648	1.31906	1.23783	1.20535	0.685594	1.90798	1.89774	0.578474	1.40237	1.66924	2.55513	1.30893	1.31769	2.25358	2.29755	1.36056	0.88642	1.50253	1.63028	1.94872	0.568761	1.16503	1.55799	1.38206	1.18784	1.40466	1.46995	1.5016	1.45939	2.75712	1.11031	0.823412	2.10228	0.974677	1.52414	0.486148	1.31903	1.0884	2.36588	1.19846	0.629971	2.04309	2.53685	1.04598	1.38495	1.72729	1.39031
Cell_0262	FOXO_TR	Glucose 17 mM + Glutamine 2.500000e-01 mM + Insulin 10000 ng/ml + EAA 1.000000e-01 X	2.78687	1.12241	2.22946	1.75304	2.03995	2.46242	1.56245	1.38157	3.01313	2.53344	2.43141	1.72287	2.70416	3.4357	2.61176	1.11028	1.71472	2.66756	1.16409	2.72988	1.53271	1.44403	3.42947	2.45725	2.8901	1.21878	1.07882	2.26732	2.11702	3.31205	1.12388	1.75645	2.70252	2.76891	1.25628	1.08066	1.87948	2.15156	3.07993	1.14848	0.943057	2.5255	2.55563	2.02645	1.00393	2.06847	2.35579
Cell_0262	AMPKARt2	Glucose 17 mM + Glutamine 2.500000e-01 mM + Insulin 10000 ng/ml + EAA 1.000000e-01 X	0.506481	0.682255	0.681509	0.495678	0.348868	0.521068	0.652943	0.489567	0.557581	0.651579	0.422914	0.617785	0.649395	0.633598	0.468332	0.71093	0.581345	0.55413	0.556456	0.524921	0.586716	0.653704	0.492186	0.654459	0.481896	0.50681	0.552751	0.680874	0.627136	0.514637	0.392986	0.560845	0.673498	0.532297	0.617358	0.674932	0.453383	0.531889	0.454857	0.674034	0.589282	0.658754	0.481469	0.675825	0.516925	0.605708	0.630269
Cell_0263	TFEB_TR	Glucose 17 mM + Glutamine 2.500000e-01 mM + Insulin 10000 ng/ml + EAA 1.000000e-01 X	1.64313	1.36092	1.26508	1.18859	0.680176	1.8348	2.08242	0.593079	1.35327	1.81262	2.71988	1.15538	1.27263	2.21282	2.33083	1.16908	1.04613	1.60412	1.7728	1.85758	0.538634	1.29847	1.46044	1.25198	1.34767	1.32713	1.36018	2.09909	1.87774	2.77484	1.19455	0.753299	1.76937	1.26259	1.21471	0.534418	1.35355	1.11951	2.34875	1.257	0.636	1.92993	2.12456	1.00151	1.36251	0.707097	1.38871
Cell_0263	FOXO_TR	Glucose 17 mM + Glutamine 2.500000e-01 mM + Insulin 10000 ng/ml + EAA 1.000000e-01 X	2.83081	1.13868	2.22196	1.74329	2.07226	2.48619	1.55202	1.40505	3.01994	2.4018	2.49184	1.6356	2.59252	3.53303	2.58475	1.11853	1.63495	2.67737	1.18479	2.8541	1.45491	1.43645	3.25454	2.4779	2.90198	1.22244	1.08539	2.27764	2.08286	3.16402	1.10755	1.65841	2.68466	2.8006	1.22971	1.1094	1.86052	2.15829	2.9831	1.15024	0.956273	2.60162	2.35331	2.12301	1.00862	1.84802	2.31826
Cell_0263	AMPKARt2	Glucose 17 mM + Glutamine 2.500000e-01 mM + Insulin 10000 ng/ml + EAA 1.000000e-01 X	0.499612	0.682168	0.678414	0.504091	0.338534	0.531247	0.654555	0.49872	0.562941	0.663208	0.422435	0.606816	0.669588	0.635804	0.469724	0.72891	0.570911	0.54805	0.557803	0.537558	0.586103	0.650371	0.506799	0.672593	0.49198	0.548362	0.547668	0.681756	0.636976	0.493481	0.39048	0.585065	0.680689	0.542358	0.65592	0.659643	0.452879	0.548536	0.449063	0.674217	0.582961	0.660083	0.494586	0.680769	0.509863	0.682242	0.626165
Cell_0264	TFEB_TR	Glucose 17 mM + Glutamine 2.500000e-01 mM + Insulin 10000 ng/ml + EAA 1.000000e-01 X	1.68118	1.41255	1.24986	1.18332	0.65988	1.82031	2.0376	0.593463	1.49215	1.75674	2.68406	1.39188	1.2314	2.31068	2.40506	1.10521	1.26072	1.78788	1.71346	1.76055	0.542774	1.27392	1.41583	1.31683	1.18737	1.57294	1.2407	1.87086	1.75637	3.00224	1.21557	0.76279	1.51841	1.58093	1.01847	0.53993	1.40883	1.11018	2.30307	1.23708	0.630817	1.33137	1.89061	1.02321	1.42736	0.759924	1.45362
Cell_0264	FOXO_TR	Glucose 17 mM + Glutamine 2.500000e-01 mM + Insulin 10000 ng/ml + EAA 1.000000e-01 X	2.7945	1.11093	2.09517	1.7453	2.08513	2.42765	1.553	1.43697	2.92165	2.32816	2.45729	1.57656	2.55196	3.58086	2.59462	1.54579	1.64437	2.7161	1.19043	2.91877	1.44514	1.40827	3.18712	2.53304	2.88729	1.20815	1.06847	2.43568	2.02502	3.21369	1.06668	1.66407	2.69278	2.84146	1.16238	1.11712	1.87627	2.12687	2.90553	1.13817	0.948988	2.63862	2.17442	2.14129	1.05856	1.94192	2.34857
Cell_0264	AMPKARt2	Glucose 17 mM + Glutamine 2.500000e-01 mM + Insulin 10000 ng/ml + EAA 1.000000e-01 X	0.512113	0.675333	0.669801	0.502682	0.336192	0.534333	0.653671	0.498905	0.571683	0.65346	0.42167	0.594886	0.674378	0.647606	0.464317	0.726985	0.557013	0.552109	0.558076	0.523565	0.5808	0.622472	0.497706	0.657318	0.482602	0.525553	0.532295	0.676761	0.666199	0.511454	0.396532	0.579239	0.686138	0.536927	0.640404	0.644894	0.453509	0.546475	0.459445	0.673117	0.585483	0.65365	0.486719	0.669903	0.512811	0.63241	0.627505
Cell_0265	TFEB_TR	Glucose 17 mM + Glutamine 2.500000e-01 mM + Insulin 10000 ng/ml + EAA 1.000000e-01 X	1.58162	1.31496	1.22676	1.17582	0.659124	1.88332	2.14228	0.57606	1.48629	1.91102	3.37357	1.56698	1.2812	2.39388	2.3926	1.16804	1.23242	1.69292	1.60004	1.56245	0.544931	1.1822	1.36309	1.40678	0.934843	1.73377	1.24606	1.18432	1.37621	3.20292	1.1997	0.88547	1.73049	1.33245	1.04928	0.505265	1.40162	1.11365	2.24162	1.14291	0.656078	1.54905	2.01002	1.15755	1.50778	0.67418	1.64933
Cell_0265	FOXO_TR	Glucose 17 mM + Glutamine 2.500000e-01 mM + Insulin 10000 ng/ml + EAA 1.000000e-01 X	2.50165	1.11358	2.02982	1.73774	2.08416	2.45496	1.57935	1.44839	2.9136	2.33699	2.49125	1.51549	1.43081	3.5511	2.67196	2.21047	1.67101	2.71486	1.1751	2.87426	1.40496	1.42144	3.1554	2.56961	2.81481	1.14585	1.05547	2.45641	2.01573	3.36212	1.04363	1.71113	2.60411	2.77902	1.18685	1.0786	1.8634	2.15421	2.84723	1.21887	0.981289	2.62126	2.10914	2.15907	1.10068	1.84095	2.35641
Cell_0265	AMPKARt2	Glucose 17 mM + Glutamine 2.500000e-01 mM + Insulin 10000 ng/ml + EAA 1.000000e-01 X	0.533886	0.67666	0.653197	0.500676	0.3328	0.524483	0.655406	0.482464	0.556816	0.628408	0.412907	0.590403	0.648719	0.662385	0.46867	0.658986	0.551778	0.561605	0.540143	0.5056	0.58004	0.620636	0.503253	0.65797	0.470703	0.518914	0.538347	0.674669	0.687135	0.516607	0.402643	0.562192	0.683386	0.536895	0.638631	0.624452	0.44423	0.536867	0.466999	0.678001	0.583479	0.651303	0.494985	0.671552	0.543153	0.643901	0.63838
Cell_0266	TFEB_TR	Glucose 17 mM + Glutamine 2.500000e-01 mM + Insulin 10000 ng/ml + EAA 1.000000e-01 X	1.51069	1.26693	1.27055	1.15579	0.67304	1.87137	2.26834	0.583811	1.56866	2.01156	3.67313	1.31199	0.970935	2.31078	2.46404	1.13309	1.0431	1.51517	1.64106	1.44375	0.536754	1.26176	1.31098	1.43184	0.979034	1.43895	1.31989	1.23891	1.22288	3.00474	1.20815	0.962609	1.88325	1.15514	0.982113	0.498382	1.36594	1.14687	2.19556	1.03737	0.684133	1.86835	2.12421	1.18472	1.49436	0.628788	1.5112
Cell_0266	FOXO_TR	Glucose 17 mM + Glutamine 2.500000e-01 mM + Insulin 10000 ng/ml + EAA 1.000000e-01 X	2.35463	1.08454	2.16204	1.692	2.11081	2.49742	1.54514	1.44545	3.07178	2.40297	2.60036	1.43867	1.44443	3.54755	2.78751	2.53445	1.63896	2.65664	1.15852	2.91907	1.32123	1.43561	3.06026	2.52574	2.77025	1.12236	1.06559	2.38031	2.0628	3.23214	1.0441	1.64666	2.55874	2.71144	1.61288	1.04972	1.83421	2.20679	2.88647	1.28716	1.02009	2.6451	2.15902	2.19566	1.11732	1.77152	2.29117
Cell_0266	AMPKARt2	Glucose 17 mM + Glutamine 2.500000e-01 mM + Insulin 10000 ng/ml + EAA 1.000000e-01 X	0.541744	0.679351	0.60934	0.496912	0.330101	0.522531	0.659861	0.473408	0.53729	0.627814	0.411348	0.592194	0.649059	0.66692	0.482248	0.625686	0.548219	0.563241	0.531918	0.520757	0.594812	0.654026	0.517633	0.683567	0.482823	0.544651	0.549626	0.677879	0.678114	0.498821	0.39872	0.569193	0.691021	0.540075	0.65528	0.588231	0.409158	0.536457	0.464645	0.692374	0.574828	0.665164	0.51015	0.677868	0.584195	0.663317	0.637695
Cell_0267	TFEB_TR	Glucose 17 mM + Glutamine 2.500000e-01 mM + Insulin 10000 ng/ml + EAA 1.000000e-01 X	1.47842	1.32227	1.38817	1.14835	0.678589	1.85341	2.20153	0.580398	1.70083	1.41595	2.99893	1.40349	1.01461	2.27216	2.32135	1.28278	0.923346	1.59255	1.79379	1.49318	0.542867	1.34177	1.30937	1.37167	1.05066	1.08501	1.37013	1.60252	1.14552	2.94866	1.2417	0.692394	1.88641	1.21945	0.995267	0.537048	1.38683	1.1634	2.25552	1.14367	0.687662	1.52845	2.25338	1.17467	1.47768	0.712541	1.2113
Cell_0267	FOXO_TR	Glucose 17 mM + Glutamine 2.500000e-01 mM + Insulin 10000 ng/ml + EAA 1.000000e-01 X	2.48099	1.01414	2.24706	1.69708	2.12344	2.49164	1.47901	1.44342	3.09809	2.47182	2.68385	1.45541	1.38805	3.64215	2.76721	2.49579	1.56433	2.61995	1.17568	3.00918	1.35133	1.40577	2.99259	2.45791	2.79341	1.16861	1.06815	2.44558	2.05142	3.06112	1.03024	1.53257	2.63629	2.73536	2.24135	1.06977	1.85345	2.22976	2.97604	1.2244	1.02315	2.67015	2.15435	2.12129	1.12261	1.76252	2.30722
Cell_0267	AMPKARt2	Glucose 17 mM + Glutamine 2.500000e-01 mM + Insulin 10000 ng/ml + EAA 1.000000e-01 X	0.55541	0.681109	0.552138	0.475473	0.326731	0.512977	0.667634	0.482393	0.551897	0.648452	0.417965	0.596241	0.654248	0.66531	0.482612	0.680675	0.549533	0.556644	0.542327	0.539996	0.603315	0.662075	0.513069	0.68494	0.493034	0.549736	0.541738	0.684143	0.672091	0.498101	0.391602	0.665259	0.692855	0.523911	0.631519	0.54292	0.401607	0.544091	0.458194	0.70027	0.575905	0.672784	0.50799	0.661488	0.599363	0.662336	0.628932
Cell_0268	TFEB_TR	Glucose 17 mM + Glutamine 2.500000e-01 mM + Insulin 10000 ng/ml + EAA 1.000000e-01 X	1.40513	1.33426	1.53298	1.15897	0.695208	1.96111	2.15208	0.549074	1.46503	1.22634	3.02464	1.79154	1.23681	2.35734	2.09517	1.48152	0.988926	1.77675	1.84766	1.3786	0.551097	1.25201	1.31504	1.25814	1.05031	1.03353	1.29362	1.42129	1.12372	3.12374	1.29758	0.719348	1.88344	1.19394	1.09148	0.582329	1.40831	1.19315	2.27736	1.29945	0.690092	1.6548	2.11656	1.32797	1.50486	0.74547	1.21016
[truncated: 68 more rows]
[truncated: 57 more columns]

## Sheet: condition 02
Treatment Spike															Glucose 17 mM + Glutamine 2.500000e-01 mM																									Insulin 10000 ng/ml
[truncated: 1,153 more rows]
[truncated: 57 more columns]

## Sheet: condition 03
Treatment Spike															Glucose 17 mM + Glutamine 2.500000e-01 mM																									Vehicle
[truncated: 1,096 more rows]
[truncated: 57 more columns]

## Sheet: condition 04
Treatment Spike															Vehicle																									Vehicle
[truncated: 1,006 more rows]
[truncated: 57 more columns]
