# Supplementary material for: Continuous sensing of nutrients and growth factors by the mTORC1-TFEB axis
Source: eLife. 2023 Sep 12;12:e74903. doi: 10.7554/eLife.74903 (PMC10547473; doi:10.7554/eLife.74903)
Supplement: Figure 4—source data 2. [file elife-74903-fig4-data2.xlsx]

## Sheet: condition 01
Treatment Spike															Glucose 17 mM + Glutamine 2.500000e-01 mM																									Insulin 10000 ng/ml
Cell	Signal	Treatment Group	0 minute	6 minute	12 minute	18 minute	24 minute	30 minute	36 minute	42 minute	48 minute	54 minute	60 minute	66 minute	72 minute	78 minute	84 minute	90 minute	96 minute	102 minute	108 minute	114 minute	120 minute	126 minute	132 minute	138 minute	144 minute	150 minute	156 minute	162 minute	168 minute	174 minute	180 minute	186 minute	192 minute	198 minute	204 minute	210 minute	216 minute	222 minute	228 minute	234 minute	240 minute	246 minute	252 minute	258 minute	264 minute	270 minute	276 minute
Cell_0001	TFEB_TR	Glucose 17 mM + Glutamine 2.500000e-01 mM + Insulin 10000 ng/ml	0.707325	1.18081	1.68518	1.31572	2.13673	2.49527	1.23273	1.67369	1.23026	0.609352	2.64472	1.19013	1.10467	1.52751	1.95708	0.963953	1.26701	0.76767	2.34033	1.34019	1.60365	1.1076	0.798657	1.45755	1.69111	1.16089	0.449477	1.23266	1.16084	2.07736	1.90067	0.702651	1.6045	1.25791	1.3401	1.20384	1.21834	1.60783	1.05725	1.18999	1.24624	1.83667	0.475778	0.638861	1.13155	1.13984	1.27528
Cell_0001	FOXO_TR	Glucose 17 mM + Glutamine 2.500000e-01 mM + Insulin 10000 ng/ml	1.4081	1.87403	1.55287	1.71428	3.86222	3.37507	1.23907	1.4126	1.36287	1.83421	3.29289	2.57317	1.45399	0.962147	3.18248	1.83273	2.42803	1.78992	1.36887	2.94805	2.55684	1.27698	1.50438	1.77094	3.13491	2.80013	1.02969	2.73525	1.01509	2.41312	2.69797	1.74858	1.79758	1.33731	1.48795	1.79281	2.6359	2.5901	1.22907	1.59118	2.7071	2.60825	1.58606	1.14134	0.892412	2.13383	3.32769
Cell_0001	AMPKARt2	Glucose 17 mM + Glutamine 2.500000e-01 mM + Insulin 10000 ng/ml	0.619891	0.53161	0.545928	0.696119	0.378192	0.532242	0.612988	0.516869	0.568428	0.603149	0.437812	0.601282	0.493863	0.643488	0.624006	0.570475	0.603308	0.458444	0.573934	0.647345	0.614684	0.445747	0.669388	0.583954	0.530593	0.48575	0.526538	0.600884	0.631752	0.529353	0.449983	0.606577	0.621096	0.624677	0.633568	0.621523	0.627877	0.627831	0.612776	0.597341	0.491823	0.393126	0.602997	0.662792	0.57476	0.52638	0.616133
Cell_0002	TFEB_TR	Glucose 17 mM + Glutamine 2.500000e-01 mM + Insulin 10000 ng/ml	0.664489	1.20864	1.68472	1.29085	2.12721	2.1237	1.23085	1.68015	1.35336	0.787889	2.46569	1.06906	1.20201	1.55141	2.08975	0.976503	1.08302	0.822345	2.13019	2.44988	1.65145	1.12082	0.906725	1.34166	1.94544	1.32011	0.491439	1.25931	1.07093	1.76371	2.19417	0.684817	1.68874	1.32693	1.38654	1.2097	1.2353	1.69188	1.03335	1.12835	1.20536	1.91078	0.468704	0.683032	1.13777	1.21209	1.08739
Cell_0002	FOXO_TR	Glucose 17 mM + Glutamine 2.500000e-01 mM + Insulin 10000 ng/ml	1.26193	1.93564	1.52145	2.24774	3.81801	3.40087	1.27651	1.34146	1.36704	1.79193	3.16572	2.56326	1.42966	0.964281	3.17115	1.85305	2.43465	1.69347	1.37949	3.02662	2.67058	1.25665	1.4767	1.65289	3.07521	2.82616	1.04802	2.56396	1.01438	2.4661	2.54257	1.76926	1.7639	1.31615	1.72492	1.73036	2.55609	2.49642	1.21486	1.51438	2.77648	2.63236	1.52867	1.17593	0.87477	2.26174	3.03565
Cell_0002	AMPKARt2	Glucose 17 mM + Glutamine 2.500000e-01 mM + Insulin 10000 ng/ml	0.616487	0.530486	0.54666	0.697652	0.374663	0.541581	0.623204	0.515927	0.599664	0.597342	0.444157	0.601106	0.485231	0.658962	0.607968	0.560361	0.606986	0.445287	0.568084	0.640705	0.62373	0.458153	0.682279	0.600437	0.534404	0.472632	0.557397	0.582414	0.659522	0.502578	0.465587	0.615449	0.578807	0.633371	0.641189	0.621457	0.619598	0.627701	0.614538	0.582022	0.489235	0.400776	0.61528	0.684392	0.575191	0.51006	0.618921
Cell_0003	TFEB_TR	Glucose 17 mM + Glutamine 2.500000e-01 mM + Insulin 10000 ng/ml	0.735768	1.19589	1.64593	1.26684	2.08349	0.896197	1.28015	1.68883	1.40462	0.859036	2.47913	1.03493	1.42413	1.36684	2.2512	0.940596	1.47531	0.844323	2.126	3.91551	1.69237	1.14421	0.995259	1.59593	2.22367	1.17597	0.527767	1.68464	1.05861	1.52637	2.22805	0.662136	1.79825	1.36585	1.58071	1.27623	0.673127	1.44245	1.42285	1.09264	1.17898	1.97419	0.469582	0.657475	1.2863	1.28138	1.13203
Cell_0003	FOXO_TR	Glucose 17 mM + Glutamine 2.500000e-01 mM + Insulin 10000 ng/ml	1.45577	1.93896	1.47251	3.02053	3.82386	1.55486	1.36901	1.30724	1.30259	1.74367	3.00015	2.62901	1.38241	0.985888	3.1302	1.95651	2.33558	1.56964	1.3346	3.02438	2.67863	1.26285	1.48061	1.62369	3.21173	2.66542	1.11238	2.48762	1.00289	2.33795	2.51457	1.69646	1.74422	1.25418	2.14113	1.76742	2.17965	2.53279	1.23073	1.50667	2.76539	2.63296	1.53358	1.15596	0.901298	2.1956	3.00801
Cell_0003	AMPKARt2	Glucose 17 mM + Glutamine 2.500000e-01 mM + Insulin 10000 ng/ml	0.616563	0.495567	0.548156	0.639314	0.375252	0.549881	0.63619	0.510841	0.606687	0.601445	0.449297	0.600462	0.498283	0.663126	0.609264	0.559979	0.60419	0.44538	0.574134	0.636627	0.629678	0.463948	0.685548	0.606716	0.538508	0.438658	0.559221	0.595444	0.669268	0.508049	0.454681	0.603223	0.549372	0.632324	0.599789	0.635563	0.707102	0.609819	0.615136	0.588312	0.511187	0.402899	0.627951	0.694719	0.578865	0.491969	0.594013
Cell_0004	TFEB_TR	Glucose 17 mM + Glutamine 2.500000e-01 mM + Insulin 10000 ng/ml	0.816096	1.20307	1.68929	1.43426	2.0226	1.148	1.259	1.53694	1.34916	0.876779	2.66674	1.11311	1.50129	1.25009	1.96612	1.09203	1.29519	0.883888	2.15441	2.77609	1.6684	1.16009	1.01662	1.53923	2.57386	0.97931	0.514308	1.95553	1.0673	1.69317	2.09713	0.672358	1.80563	1.30997	1.58877	1.3658	0.927857	1.30955	1.45749	1.16005	1.12851	1.97518	0.474106	0.610753	1.36726	1.30329	1.00859
Cell_0004	FOXO_TR	Glucose 17 mM + Glutamine 2.500000e-01 mM + Insulin 10000 ng/ml	1.6624	1.92824	1.49839	3.25337	3.91441	1.41331	1.38131	1.3035	1.487	1.71103	3.04228	2.73357	1.37529	0.947292	3.16439	1.94233	2.24164	1.54743	1.29109	3.01436	2.63225	1.23631	1.44331	1.64606	3.44521	2.40056	1.18925	2.40387	1.00019	2.4409	2.60697	1.64277	1.6806	1.17757	2.54959	1.97805	2.17423	2.68746	1.1963	1.86168	2.67146	2.60137	1.56461	1.08938	0.893802	2.06634	3.37446
Cell_0004	AMPKARt2	Glucose 17 mM + Glutamine 2.500000e-01 mM + Insulin 10000 ng/ml	0.628794	0.484624	0.546884	0.598881	0.379148	0.550148	0.615321	0.523495	0.619818	0.61144	0.438584	0.619274	0.511085	0.656682	0.617557	0.554714	0.601915	0.449148	0.595636	0.620135	0.617447	0.463903	0.676186	0.615842	0.511119	0.421722	0.55122	0.598517	0.657071	0.514649	0.451719	0.591718	0.539136	0.630145	0.584061	0.632153	0.653095	0.586208	0.624167	0.606006	0.491812	0.415941	0.618165	0.686597	0.57694	0.489963	0.58644
Cell_0005	TFEB_TR	Glucose 17 mM + Glutamine 2.500000e-01 mM + Insulin 10000 ng/ml	0.802416	1.26241	1.76985	1.72684	2.07221	1.12817	1.19279	1.49677	1.24455	0.624159	0.967316	1.19674	1.3957	1.29379	2.046	1.1547	0.865197	0.896863	1.90918	1.59655	1.65288	1.17014	1.07633	1.27843	2.97213	1.05119	0.507447	1.73676	1.24949	1.57947	2.31157	0.694793	1.9183	1.23817	1.61582	1.46191	0.867741	1.54895	1.29544	1.21638	1.21818	0.644187	0.463138	0.596823	1.20252	1.34555	0.898289
Cell_0005	FOXO_TR	Glucose 17 mM + Glutamine 2.500000e-01 mM + Insulin 10000 ng/ml	1.55752	1.92484	1.56381	3.15243	3.86412	1.4584	1.29836	1.27864	1.99675	1.77361	1.66561	2.74235	1.37851	0.926292	3.17242	1.77335	2.31783	1.55938	1.31309	3.04177	2.70669	1.22727	1.43628	1.6623	3.7077	2.4791	1.19703	2.12446	1.0258	2.53365	2.56569	1.61698	1.56169	1.13439	2.75581	2.15613	2.08641	2.75069	1.16262	2.30395	2.71615	1.79573	1.48412	1.08451	0.816015	2.13537	3.54861
Cell_0005	AMPKARt2	Glucose 17 mM + Glutamine 2.500000e-01 mM + Insulin 10000 ng/ml	0.646895	0.48737	0.546663	0.648288	0.366815	0.546589	0.577597	0.545665	0.637651	0.611017	0.571668	0.640015	0.502551	0.658648	0.618719	0.541597	0.604012	0.455255	0.600784	0.613843	0.604576	0.459095	0.671668	0.622557	0.463077	0.41872	0.56474	0.585419	0.646847	0.502197	0.473327	0.59007	0.52513	0.634628	0.622496	0.622381	0.657766	0.575805	0.614	0.551578	0.457573	0.583621	0.60015	0.681776	0.595639	0.486767	0.606549
Cell_0006	TFEB_TR	Glucose 17 mM + Glutamine 2.500000e-01 mM + Insulin 10000 ng/ml	0.796697	1.34001	1.79662	1.71962	2.07621	1.14769	1.2255	1.66769	1.26348	0.592932	0.896113	1.28977	1.32418	1.41852	2.31726	1.01515	2.34118	0.867728	1.71433	1.77022	1.6077	1.19039	1.16024	1.65636	3.2866	1.06831	0.537543	1.47651	1.50809	1.36071	2.16058	0.694383	2.03946	1.15367	1.90317	1.48583	0.79117	1.63413	1.14934	1.25776	1.32857	0.728611	0.459809	0.61248	1.13607	1.40116	1.04668
Cell_0006	FOXO_TR	Glucose 17 mM + Glutamine 2.500000e-01 mM + Insulin 10000 ng/ml	1.50114	1.91405	1.55701	3.16319	3.80786	1.4861	1.2231	1.24319	2.48536	1.96024	1.5869	2.6915	1.33992	1.23541	3.10912	1.76455	2.39048	1.50585	1.2896	2.98295	2.74259	1.26601	1.44998	1.69326	3.81304	2.63927	1.16849	1.89577	1.05723	2.5195	2.39127	1.5628	1.47986	1.14246	2.91869	2.10171	1.98233	2.71092	1.17468	2.36335	2.8406	1.62984	1.41321	1.11688	1.14942	2.25631	3.49037
Cell_0006	AMPKARt2	Glucose 17 mM + Glutamine 2.500000e-01 mM + Insulin 10000 ng/ml	0.655123	0.46606	0.548841	0.692773	0.352276	0.541557	0.564297	0.552363	0.606365	0.603316	0.571989	0.621158	0.496946	0.666726	0.612548	0.553892	0.620358	0.4734	0.589035	0.619383	0.608704	0.449545	0.676099	0.619661	0.44075	0.398081	0.567625	0.587792	0.655393	0.508163	0.482499	0.582545	0.518545	0.62888	0.632717	0.618734	0.701517	0.570302	0.608931	0.484428	0.475341	0.565025	0.585389	0.685003	0.608451	0.469392	0.608992
Cell_0007	TFEB_TR	Glucose 17 mM + Glutamine 2.500000e-01 mM + Insulin 10000 ng/ml	0.834385	1.4266	1.81991	1.50163	1.96262	1.19812	1.29011	1.67594	1.49727	1.17803	0.917278	1.45924	1.49398	1.62617	2.05841	1.16741	3.77279	0.885342	1.77316	2.12883	1.56537	1.18457	1.17207	2.22083	3.41072	0.951421	0.546739	1.48605	1.49068	1.83788	1.50636	0.741334	2.00166	1.07936	1.93234	1.3469	0.89962	1.51556	0.934521	1.25731	1.16515	0.717578	0.496212	0.604422	1.25625	1.35254	0.809805
Cell_0007	FOXO_TR	Glucose 17 mM + Glutamine 2.500000e-01 mM + Insulin 10000 ng/ml	1.6441	1.88166	1.52121	3.13229	3.83703	1.46047	1.1686	1.21473	2.76607	2.03747	1.5827	2.66348	1.31112	1.77349	3.10087	1.83356	2.42541	1.46011	1.32653	3.00934	2.67773	1.26639	1.4034	1.63515	3.75517	2.55337	1.17009	1.84171	1.02092	2.54542	2.32502	1.56849	1.46024	1.16349	3.1012	1.89117	1.92736	2.63164	1.18707	2.19063	2.9078	1.59489	1.49507	1.0874	1.98913	2.19911	1.67548
Cell_0007	AMPKARt2	Glucose 17 mM + Glutamine 2.500000e-01 mM + Insulin 10000 ng/ml	0.649997	0.440016	0.548165	0.664058	0.357101	0.541528	0.570749	0.551233	0.568586	0.60059	0.579584	0.590828	0.506561	0.674336	0.597317	0.703415	0.645777	0.483929	0.606359	0.616581	0.612544	0.447759	0.688159	0.613537	0.461836	0.391956	0.544334	0.595424	0.664807	0.516592	0.470455	0.578579	0.52581	0.62244	0.603321	0.615922	0.718932	0.563777	0.623441	0.528837	0.501811	0.555039	0.571024	0.685869	0.545569	0.458129	0.699657
Cell_0008	TFEB_TR	Glucose 17 mM + Glutamine 2.500000e-01 mM + Insulin 10000 ng/ml	0.807258	1.52752	1.86012	1.38049	1.93255	1.09513	1.32791	1.48151	1.76753	1.33297	0.969035	1.62083	1.39752	1.72426	1.90584	1.11311	2.59656	0.917844	1.8717	3.82803	1.62478	1.16335	1.19824	2.17618	3.37951	0.953589	0.525706	1.4895	1.36654	2.31659	1.33249	0.826798	1.94021	1.23883	1.751	1.20029	0.944334	1.78145	0.981451	1.13097	0.991845	0.685196	0.546736	0.550355	1.2934	1.27926	0.707859
Cell_0008	FOXO_TR	Glucose 17 mM + Glutamine 2.500000e-01 mM + Insulin 10000 ng/ml	1.57733	1.84674	1.53156	3.08911	3.75208	1.49937	1.12004	1.17158	2.85607	1.96163	1.58877	2.60496	1.33519	2.05343	3.17766	1.82908	2.53172	1.49264	1.78279	3.27312	2.66234	1.24688	1.38151	1.435	3.70114	2.43693	1.15677	1.72203	1.01475	2.51082	2.44536	1.6242	1.41665	1.17944	3.1267	1.72235	1.98006	2.50905	1.196	2.13541	2.88742	1.59471	1.57512	1.04281	2.51582	2.07822	1.80308
Cell_0008	AMPKARt2	Glucose 17 mM + Glutamine 2.500000e-01 mM + Insulin 10000 ng/ml	0.634939	0.435227	0.55144	0.630017	0.364391	0.544053	0.57956	0.550578	0.574069	0.594646	0.574973	0.59673	0.518731	0.685995	0.590506	0.70202	0.647716	0.482591	0.631017	0.605643	0.610119	0.459684	0.693261	0.613997	0.480897	0.412917	0.541641	0.5902	0.661895	0.499948	0.45147	0.596701	0.52797	0.628966	0.595748	0.629553	0.706909	0.55498	0.622851	0.611479	0.495003	0.570286	0.550998	0.685352	0.449082	0.464554	0.710242
Cell_0009	TFEB_TR	Glucose 17 mM + Glutamine 2.500000e-01 mM + Insulin 10000 ng/ml	0.766951	1.60176	1.86387	1.2719	1.954	1.05943	1.40423	1.4009	1.78661	1.04036	1.02527	1.58298	1.10038	1.51243	2.13977	1.09062	1.4836	0.88599	2.33794	5.27492	1.17641	1.17075	1.27163	1.86343	3.33711	1.08327	0.500019	1.32143	1.37452	1.94204	1.68855	0.783022	1.91285	1.40812	1.96498	1.2981	0.870087	2.25744	1.51288	1.01812	1.14344	0.649431	0.587401	0.537577	1.23596	1.31168	0.763211
Cell_0009	FOXO_TR	Glucose 17 mM + Glutamine 2.500000e-01 mM + Insulin 10000 ng/ml	1.40625	1.84285	1.52628	3.18795	3.54402	1.49389	1.11089	1.15387	2.86637	2.01043	1.55522	2.50447	1.35609	2.05215	3.24381	1.82776	2.55978	1.50804	2.50716	3.41947	2.26143	1.29907	1.42216	1.41335	3.68514	2.40396	1.12433	1.66734	1.11297	2.39978	2.58515	1.63181	1.34828	1.17973	3.06764	1.78824	2.10593	2.43264	1.21193	2.17806	2.74432	1.57989	1.53633	1.06133	2.51039	2.07501	1.97461
Cell_0009	AMPKARt2	Glucose 17 mM + Glutamine 2.500000e-01 mM + Insulin 10000 ng/ml	0.623825	0.440482	0.559807	0.629669	0.35735	0.543109	0.585149	0.54851	0.575995	0.583121	0.571218	0.603713	0.529619	0.684242	0.600407	0.718069	0.625341	0.485604	0.593976	0.594052	0.589857	0.46776	0.682965	0.635767	0.474336	0.418406	0.571877	0.600586	0.661078	0.490924	0.417122	0.62359	0.526501	0.637351	0.607936	0.645758	0.702939	0.543697	0.61222	0.609736	0.492812	0.589641	0.521588	0.689713	0.411879	0.479685	0.708891
Cell_0010	TFEB_TR	Glucose 17 mM + Glutamine 2.500000e-01 mM + Insulin 10000 ng/ml	0.803173	1.62715	1.8833	1.27444	1.86241	1.09719	1.44326	1.41958	1.72607	1.37675	1.04383	1.45689	1.4498	1.32296	2.07787	1.14025	1.87448	0.855417	3.0428	3.82284	1.18088	1.15093	1.28988	1.67426	3.36705	1.20929	0.495714	1.23292	1.28094	1.64246	1.9968	0.664015	1.86361	1.19628	2.1268	1.54454	0.901463	2.18833	1.89734	1.07746	1.37131	0.620908	0.645661	0.616936	1.22554	1.32239	0.913946
Cell_0010	FOXO_TR	Glucose 17 mM + Glutamine 2.500000e-01 mM + Insulin 10000 ng/ml	1.51448	1.81975	1.52556	3.17494	3.42869	1.46195	1.10066	1.18843	2.95725	2.13137	1.54998	2.43728	1.34537	2.05116	3.22242	1.84528	2.40786	1.4532	3.00696	3.31748	2.01889	1.36499	1.40415	1.796	3.67326	2.51341	1.15486	1.82336	1.07387	2.36135	2.52902	1.66085	1.3335	1.20136	3.09507	2.0496	2.13394	2.3832	1.21166	2.25286	2.57144	1.60672	1.47572	1.08342	2.54983	2.11783	2.20199
Cell_0010	AMPKARt2	Glucose 17 mM + Glutamine 2.500000e-01 mM + Insulin 10000 ng/ml	0.633029	0.438868	0.557007	0.633811	0.360133	0.544242	0.579531	0.552527	0.55379	0.58079	0.582171	0.574155	0.530278	0.666588	0.594671	0.73301	0.614993	0.483856	0.535775	0.588286	0.599243	0.458016	0.680803	0.64059	0.476627	0.416323	0.59099	0.625923	0.668778	0.496986	0.382712	0.635379	0.534827	0.649378	0.607284	0.632455	0.697869	0.54384	0.614941	0.578317	0.507676	0.591571	0.498607	0.693117	0.42545	0.487846	0.711174
Cell_0011	TFEB_TR	Glucose 17 mM + Glutamine 2.500000e-01 mM + Insulin 10000 ng/ml	0.827913	1.67485	1.96003	1.69244	1.77187	1.05469	1.41933	1.33582	1.8635	1.47643	0.985301	1.5265	1.91245	1.53353	1.96833	1.20525	1.67632	0.860968	2.79967	2.97609	1.25187	1.08316	1.30451	1.61338	3.31214	1.69616	0.553864	1.30616	1.09677	2.08194	2.03973	0.702504	1.82947	0.952742	1.8695	1.61343	1.02251	1.83834	1.76	1.18522	1.39678	0.664075	0.720789	0.684192	1.26479	1.21762	1.01144
Cell_0011	FOXO_TR	Glucose 17 mM + Glutamine 2.500000e-01 mM + Insulin 10000 ng/ml	1.67938	1.75368	1.57199	3.00639	3.44539	1.53913	1.06791	1.19653	3.0677	2.06306	1.58456	2.38794	1.34429	2.02492	3.15298	1.85405	2.23995	1.44503	3.26082	3.2471	1.94274	1.37281	1.33681	2.21587	3.64537	2.68357	1.2277	1.83927	0.984485	2.36218	2.33664	1.75266	1.35187	1.23552	3.1265	2.19745	2.08628	2.21741	1.17802	2.35978	2.47435	1.6452	1.44418	1.08041	2.62892	2.06413	2.28862
Cell_0011	AMPKARt2	Glucose 17 mM + Glutamine 2.500000e-01 mM + Insulin 10000 ng/ml	0.64334	0.430548	0.540442	0.630829	0.375521	0.545675	0.579091	0.556067	0.543075	0.583963	0.586878	0.546453	0.520783	0.663223	0.575463	0.722374	0.620314	0.479766	0.529154	0.589586	0.586829	0.440264	0.689244	0.55676	0.489739	0.517571	0.587601	0.626897	0.679514	0.486138	0.399218	0.629252	0.542985	0.662564	0.598549	0.623127	0.690681	0.554091	0.62446	0.585323	0.514331	0.583151	0.505346	0.692884	0.44917	0.485135	0.71441
Cell_0012	TFEB_TR	Glucose 17 mM + Glutamine 2.500000e-01 mM + Insulin 10000 ng/ml	0.815798	1.78247	1.98903	2.05769	1.78098	1.03716	1.47988	1.26373	1.91227	0.837371	0.967421	1.68803	1.58917	1.75084	2.22033	1.18192	1.23927	0.843347	1.84785	4.47193	1.2618	1.0766	1.34719	1.67305	3.05243	1.73735	0.593436	1.39402	1.12424	2.2583	1.86232	0.788658	1.82824	1.09151	1.80557	1.48634	1.03338	1.88032	1.52042	1.15851	1.30547	0.6943	0.774893	0.652199	1.23584	1.12557	1.07353
Cell_0012	FOXO_TR	Glucose 17 mM + Glutamine 2.500000e-01 mM + Insulin 10000 ng/ml	1.66622	1.73324	1.52869	2.95487	3.49332	1.57953	1.08928	1.18244	3.14345	1.95611	1.58642	2.29684	1.33342	1.96731	3.17033	1.80618	2.15685	1.50653	3.37518	3.18515	1.97585	1.36692	1.32702	2.3092	3.61782	2.73804	1.27583	1.72016	1.42257	2.33525	2.29158	1.81386	1.32936	1.1734	3.07932	2.1246	2.10314	2.04354	1.1469	2.33457	2.41188	1.63799	1.4212	1.08928	2.53043	1.97365	2.23231
Cell_0012	AMPKARt2	Glucose 17 mM + Glutamine 2.500000e-01 mM + Insulin 10000 ng/ml	0.633795	0.419836	0.534556	0.630301	0.371437	0.533101	0.603679	0.55289	0.542347	0.57901	0.586341	0.545998	0.521999	0.669787	0.581815	0.705875	0.622745	0.488599	0.532377	0.586997	0.576583	0.423072	0.693491	0.437094	0.480503	0.501245	0.587039	0.612526	0.689863	0.473727	0.460297	0.615711	0.541685	0.663223	0.589047	0.644454	0.715294	0.555957	0.633733	0.584322	0.512191	0.570079	0.53224	0.699679	0.47702	0.487571	0.708199
Cell_0013	TFEB_TR	Glucose 17 mM + Glutamine 2.500000e-01 mM + Insulin 10000 ng/ml	0.841213	1.84697	1.95686	1.74125	1.75561	1.00518	1.56602	1.35055	1.8651	0.942771	0.983439	1.72923	1.26992	1.52963	2.33169	1.13616	1.55406	0.81307	1.73622	4.32616	1.22803	1.14582	1.32075	1.53691	2.87353	1.63943	0.530591	1.52477	1.39812	1.7742	1.58183	0.742476	1.8317	1.31267	1.97099	1.43783	0.955509	1.93321	1.29918	1.06348	1.19301	0.658597	0.799082	0.589818	1.15132	1.0888	1.16285
Cell_0013	FOXO_TR	Glucose 17 mM + Glutamine 2.500000e-01 mM + Insulin 10000 ng/ml	1.65828	1.75353	1.53345	3.05265	3.53936	1.51376	1.1274	1.19828	3.27987	2.01612	1.55526	2.17069	1.28057	2.00753	3.25103	1.76376	2.12027	1.50608	3.24779	3.04942	2.00809	1.35624	1.34021	2.24954	3.6505	2.75392	1.30193	1.77169	2.24851	2.33762	2.23504	1.84721	1.26575	1.2212	3.01914	2.04576	2.14006	1.97139	1.16925	2.16108	2.42937	1.60112	1.41999	1.06727	2.49403	1.96213	2.26649
Cell_0013	AMPKARt2	Glucose 17 mM + Glutamine 2.500000e-01 mM + Insulin 10000 ng/ml	0.62845	0.409216	0.560048	0.631934	0.36085	0.521234	0.622146	0.556869	0.528904	0.577659	0.588023	0.547556	0.522763	0.66733	0.592478	0.714076	0.62302	0.49938	0.509216	0.57979	0.591023	0.408645	0.702727	0.405011	0.461677	0.509608	0.591138	0.611732	0.677819	0.481379	0.626118	0.605306	0.539753	0.668702	0.576826	0.652354	0.738522	0.554213	0.627388	0.555663	0.510165	0.564926	0.552876	0.709298	0.493256	0.498837	0.705951
Cell_0014	TFEB_TR	Glucose 17 mM + Glutamine 2.500000e-01 mM + Insulin 10000 ng/ml	0.889682	1.82364	2.00154	1.38385	1.67766	0.949837	1.52646	1.39673	2.02618	1.43428	0.91106	1.73194	1.43676	1.45623	2.30723	1.16254	1.56575	0.803002	2.31925	2.46633	1.23994	1.19254	1.31628	1.16474	3.0506	1.65249	0.496942	1.60677	1.693	1.67728	1.92836	0.764096	1.81714	1.35208	2.03497	1.53061	0.936359	1.7542	1.25526	1.06092	1.06293	0.674226	0.804291	0.619789	1.32216	1.04011	1.21147
Cell_0014	FOXO_TR	Glucose 17 mM + Glutamine 2.500000e-01 mM + Insulin 10000 ng/ml	1.7818	1.74194	2.00261	3.21291	3.54667	1.5339	1.0906	1.15696	3.3484	2.0938	1.51855	2.0485	1.25179	2.04059	3.27795	1.79763	2.08034	1.41835	3.07915	3.08409	2.02793	1.31341	1.30831	2.22475	3.67509	2.70329	1.28003	1.80019	2.65401	2.39036	2.16139	1.87827	1.2333	1.6991	3.01208	2.14352	2.17422	1.87499	1.14946	2.09387	2.59096	1.58145	1.42343	1.04192	2.54639	1.98455	2.24847
Cell_0014	AMPKARt2	Glucose 17 mM + Glutamine 2.500000e-01 mM + Insulin 10000 ng/ml	0.632936	0.40984	0.594135	0.620652	0.369352	0.538963	0.610273	0.57347	0.5161	0.58724	0.579949	0.538777	0.509969	0.663962	0.578521	0.727275	0.620167	0.510769	0.501854	0.577071	0.601408	0.409873	0.703391	0.436336	0.458405	0.486613	0.594065	0.614537	0.622112	0.480257	0.642593	0.605787	0.540935	0.681578	0.576414	0.633981	0.701055	0.556231	0.613313	0.538529	0.510101	0.568523	0.560118	0.703776	0.4913	0.507904	0.707698
Cell_0015	TFEB_TR	Glucose 17 mM + Glutamine 2.500000e-01 mM + Insulin 10000 ng/ml	0.944994	1.81797	2.13469	1.63421	0.954891	1.09486	1.47719	1.31838	1.95301	1.13887	0.903509	1.74451	1.37051	1.86068	2.54262	1.19617	1.34848	0.789822	2.40384	2.20551	1.19048	1.2277	1.40399	1.16822	3.35247	1.71421	0.548978	1.37613	1.68862	2.23727	1.91681	0.932152	1.76411	1.35188	2.11532	1.14987	1.01653	1.81358	1.6578	1.11975	0.990462	0.708896	0.825392	0.715868	1.69125	0.992887	1.18267
Cell_0015	FOXO_TR	Glucose 17 mM + Glutamine 2.500000e-01 mM + Insulin 10000 ng/ml	1.93164	1.73502	2.71966	3.34447	1.20818	1.62853	1.04941	1.17323	3.27682	2.15149	1.50545	1.99647	1.26344	2.02765	3.32723	1.8157	2.00991	1.33309	3.12867	3.24788	1.99822	1.26692	1.27895	2.1564	3.62023	2.69299	1.19957	1.70411	2.59681	2.42987	2.21778	1.84608	1.28139	2.25345	3.04051	1.99088	2.22764	1.80713	1.07539	2.11253	2.75265	1.56778	1.39277	1.08452	2.49204	2.01483	1.99289
Cell_0015	AMPKARt2	Glucose 17 mM + Glutamine 2.500000e-01 mM + Insulin 10000 ng/ml	0.617773	0.424653	0.596139	0.596862	0.574104	0.561095	0.601	0.598791	0.524919	0.586849	0.577651	0.523847	0.515804	0.653203	0.577393	0.718842	0.611021	0.530873	0.517729	0.581368	0.592365	0.424119	0.686237	0.434709	0.460379	0.466108	0.598314	0.614692	0.563014	0.467904	0.643151	0.611969	0.54712	0.673036	0.589387	0.625127	0.647074	0.553771	0.632148	0.534494	0.524646	0.563773	0.55016	0.695365	0.484011	0.516866	0.702571
Cell_0016	TFEB_TR	Glucose 17 mM + Glutamine 2.500000e-01 mM + Insulin 10000 ng/ml	1.02346	1.83885	2.25603	1.87064	1.25192	1.27109	1.52633	1.3563	1.62788	1.00755	1.06947	1.78081	1.25974	1.92258	2.50514	1.21532	1.51287	0.773215	2.13097	3.10182	1.10545	1.28855	1.40053	1.65914	3.4704	1.66035	0.552055	1.10802	1.51298	2.55589	1.59529	1.00201	1.75234	1.2688	2.17157	0.980845	1.19268	1.82051	1.7733	1.13458	1.09309	0.645489	0.878279	0.713069	1.66176	0.954259	1.13491
Cell_0016	FOXO_TR	Glucose 17 mM + Glutamine 2.500000e-01 mM + Insulin 10000 ng/ml	1.9239	1.74513	3.03162	3.35358	1.1699	1.66419	1.06536	1.61099	3.26662	2.3499	1.59137	2.05305	1.24607	2.10767	3.3714	1.77344	1.9669	1.2975	3.23309	3.14357	1.87235	1.2233	1.29668	2.12855	3.63223	2.85508	1.12269	1.72844	2.5525	2.39816	2.32768	1.80237	1.33731	2.36332	2.99973	2.03368	2.17859	1.85858	1.29574	1.99748	2.76052	1.49945	1.36487	1.07183	2.41661	2.08574	1.80793
Cell_0016	AMPKARt2	Glucose 17 mM + Glutamine 2.500000e-01 mM + Insulin 10000 ng/ml	0.60029	0.433229	0.570831	0.590015	0.584041	0.541453	0.607334	0.611933	0.538554	0.580656	0.592227	0.515687	0.538897	0.632169	0.593043	0.711955	0.602434	0.545838	0.532119	0.593064	0.592347	0.428395	0.68873	0.428518	0.461221	0.49935	0.592038	0.626716	0.566534	0.472716	0.637958	0.612615	0.562975	0.661521	0.584986	0.610131	0.637487	0.554511	0.647386	0.52446	0.546111	0.561526	0.533284	0.708518	0.475684	0.521143	0.704944
Cell_0017	TFEB_TR	Glucose 17 mM + Glutamine 2.500000e-01 mM + Insulin 10000 ng/ml	1.0878	1.79985	2.35591	1.72381	1.13864	1.17816	1.54343	1.51258	1.88138	0.711005	1.15952	1.89215	1.54761	1.64789	1.91322	1.24017	1.49485	0.77398	2.04088	3.06244	1.14706	1.31091	1.29366	1.91207	3.43976	1.65115	0.522363	1.27579	1.72516	2.64815	1.55995	0.905656	1.87404	1.11038	2.21888	0.918385	1.35229	1.53537	1.33193	1.08568	0.985187	0.570052	0.882569	0.67931	1.39594	0.901763	1.10236
Cell_0017	FOXO_TR	Glucose 17 mM + Glutamine 2.500000e-01 mM + Insulin 10000 ng/ml	1.8161	1.71368	2.95217	3.35169	1.17821	1.68544	1.06777	2.31563	3.29202	1.27509	1.7161	2.11358	1.25063	2.14648	3.23648	1.76623	1.99746	1.27968	3.27664	2.88112	1.74002	1.16303	1.31104	2.28829	3.7423	3.02006	1.06337	1.76789	2.54657	2.30442	2.32651	1.84687	1.31587	2.21986	2.90061	2.04374	2.00554	1.83606	1.88101	1.8836	1.23128	1.40884	1.3932	1.06863	2.44467	2.10232	1.85007
Cell_0017	AMPKARt2	Glucose 17 mM + Glutamine 2.500000e-01 mM + Insulin 10000 ng/ml	0.613206	0.427225	0.555474	0.600045	0.592276	0.50218	0.605383	0.582232	0.531678	0.740669	0.587109	0.529341	0.547194	0.632338	0.586217	0.722466	0.596917	0.552499	0.539843	0.604296	0.602481	0.421849	0.704732	0.478507	0.463656	0.518083	0.57671	0.640913	0.616469	0.474775	0.638426	0.613151	0.576138	0.673586	0.562849	0.613535	0.629783	0.562366	0.612947	0.511673	0.537847	0.562584	0.547785	0.72167	0.475994	0.508519	0.716979
Cell_0018	TFEB_TR	Glucose 17 mM + Glutamine 2.500000e-01 mM + Insulin 10000 ng/ml	1.12202	1.75686	2.44286	1.55702	1.06687	1.09606	1.43997	1.591	2.26559	0.749564	1.10716	1.85144	1.55629	1.75503	1.74069	1.21807	1.40202	0.780723	1.87851	2.18302	1.17665	1.30455	1.23624	1.61548	3.31835	1.67119	0.538879	1.51547	2.14165	3.09032	1.87615	0.791184	1.9946	1.20066	2.2787	1.11498	1.38119	1.63485	1.16933	1.03363	1.02332	0.574535	0.815875	0.792977	1.54607	0.877177	1.07052
Cell_0018	FOXO_TR	Glucose 17 mM + Glutamine 2.500000e-01 mM + Insulin 10000 ng/ml	1.86588	1.67821	2.90677	3.40799	1.20216	1.68769	1.03974	2.67831	3.21024	1.24335	1.72207	2.04841	1.37965	2.05191	3.11958	1.77643	2.01459	1.23236	3.33889	2.92491	1.6945	1.13179	1.30801	2.44797	3.77268	2.90771	1.05501	1.6564	2.61009	2.19014	2.26073	1.891	1.27701	2.18346	2.91435	1.99735	1.86416	1.73168	2.29277	1.95027	1.2391	1.37743	1.43367	1.45412	2.50743	2.03347	1.83979
Cell_0018	AMPKARt2	Glucose 17 mM + Glutamine 2.500000e-01 mM + Insulin 10000 ng/ml	0.627803	0.426158	0.565135	0.595136	0.591997	0.489444	0.601176	0.535672	0.5198	0.727571	0.549021	0.542185	0.557442	0.652655	0.57887	0.721061	0.598349	0.557793	0.537382	0.605068	0.602266	0.416519	0.704533	0.54086	0.471113	0.513211	0.573478	0.632048	0.637792	0.452389	0.637093	0.615877	0.57438	0.675549	0.559842	0.619701	0.573712	0.561325	0.599888	0.499382	0.547206	0.53702	0.582477	0.703915	0.482153	0.493928	0.711741
Cell_0019	TFEB_TR	Glucose 17 mM + Glutamine 2.500000e-01 mM + Insulin 10000 ng/ml	1.15858	1.78435	2.49027	1.52431	1.15643	1.24566	1.33467	1.6363	1.89688	0.745815	1.14305	1.60187	1.2993	1.86084	0.731053	1.20195	1.64745	0.786057	1.62821	1.88697	1.06115	1.34471	1.17376	1.45138	3.12266	1.6338	0.530718	1.36907	2.0469	3.16324	1.94083	0.816036	1.98929	1.38306	2.10586	1.21957	1.46942	1.89317	1.24695	1.11918	0.937695	0.618938	0.780312	0.839052	1.69104	1.24599	1.00201
Cell_0019	FOXO_TR	Glucose 17 mM + Glutamine 2.500000e-01 mM + Insulin 10000 ng/ml	1.98639	1.71393	2.9362	3.39109	1.19622	1.59701	1.02914	2.66132	3.08682	1.23211	1.64271	1.94064	1.57085	2.08217	1.39979	1.76591	1.97754	1.25177	3.3985	3.09159	1.68511	1.16188	1.33169	2.44947	3.73734	2.64962	1.14562	1.56696	2.85568	2.09402	2.25052	1.85555	1.28905	2.24085	3.03932	1.9599	1.79725	1.72731	2.30598	2.05522	1.2193	1.3724	1.43095	2.0778	2.4734	1.58488	1.73815
Cell_0019	AMPKARt2	Glucose 17 mM + Glutamine 2.500000e-01 mM + Insulin 10000 ng/ml	0.62241	0.438445	0.579679	0.592932	0.585637	0.485472	0.608493	0.520943	0.526351	0.73998	0.509078	0.547426	0.575454	0.653813	0.697733	0.699539	0.604168	0.554961	0.538493	0.603562	0.596948	0.413804	0.713277	0.557417	0.495871	0.531138	0.579953	0.610558	0.625389	0.437204	0.632663	0.605765	0.566863	0.654532	0.570866	0.612079	0.503286	0.557758	0.632301	0.484855	0.551025	0.503217	0.579317	0.671495	0.477093	0.591335	0.689718
Cell_0020	TFEB_TR	Glucose 17 mM + Glutamine 2.500000e-01 mM + Insulin 10000 ng/ml	1.18813	1.79946	2.51537	1.59812	1.17486	1.30361	1.36081	1.71331	1.53787	0.734734	1.24742	1.50324	1.62332	1.78698	1.10462	1.2347	1.70403	0.803918	1.58286	2.5021	0.991932	1.39085	1.04533	1.7722	2.97046	1.6528	0.498857	1.28984	1.55368	2.45423	1.73589	1.01408	1.98362	1.25065	2.02504	0.988187	1.64594	1.64902	1.14432	1.31001	0.926641	0.685415	0.77013	0.815238	1.40627	0.940003	0.959807
Cell_0020	FOXO_TR	Glucose 17 mM + Glutamine 2.500000e-01 mM + Insulin 10000 ng/ml	1.95939	1.75394	2.93971	3.33362	1.21128	1.49567	1.02181	2.69903	2.96563	1.24381	1.57121	1.94758	1.69763	2.2646	1.4052	1.82337	1.96833	1.47616	3.48065	2.91525	1.65235	1.18282	1.32278	2.45813	3.72375	2.53713	1.19917	1.59614	2.94361	2.07911	2.26425	1.83297	1.30287	2.35395	3.1018	2.00563	1.72582	1.70354	2.29761	2.14745	1.17942	1.34419	1.42678	2.32525	2.33982	1.60652	1.74583
Cell_0020	AMPKARt2	Glucose 17 mM + Glutamine 2.500000e-01 mM + Insulin 10000 ng/ml	0.625071	0.447797	0.578149	0.623794	0.58472	0.468807	0.61367	0.524506	0.534998	0.744994	0.483076	0.578871	0.571311	0.638465	0.694096	0.686494	0.598057	0.547616	0.55074	0.611021	0.595726	0.417326	0.733253	0.540787	0.522888	0.526693	0.582647	0.608198	0.627234	0.448236	0.637484	0.594673	0.563735	0.649535	0.567772	0.612688	0.472386	0.561851	0.633861	0.470202	0.559024	0.498993	0.557383	0.642102	0.476663	0.627153	0.676419
Cell_0021	TFEB_TR	Glucose 17 mM + Glutamine 2.500000e-01 mM + Insulin 10000 ng/ml	1.1668	1.75208	2.5145	1.5647	1.2824	1.22736	1.45624	1.72547	1.72619	0.733087	1.28753	1.53768	1.94764	1.89072	0.993149	1.24622	1.45927	0.843484	1.80131	0.528273	0.991197	1.40694	0.935928	1.88812	2.77494	1.66939	0.505154	1.4981	1.29727	2.15257	1.69168	1.16387	2.02044	1.0925	2.2441	0.952234	1.61094	1.47967	0.946188	1.34095	1.0525	0.753254	0.71034	1.21742	1.32886	0.846181	1.03701
Cell_0021	FOXO_TR	Glucose 17 mM + Glutamine 2.500000e-01 mM + Insulin 10000 ng/ml	1.88156	1.70346	2.93148	3.32204	1.274	1.46844	1.01356	2.77422	2.869	1.24128	1.48928	1.97445	1.75312	2.33952	1.40474	1.90002	2.00054	1.7604	3.5493	1.24334	1.59891	1.15997	1.32044	2.49997	3.67399	2.49341	1.12472	1.62636	2.74826	2.14296	2.31265	1.82459	1.29118	2.52643	3.06075	2.11624	1.62478	1.59771	2.42671	2.29535	1.15641	1.33071	1.43916	2.21825	2.28101	1.67408	1.80414
Cell_0021	AMPKARt2	Glucose 17 mM + Glutamine 2.500000e-01 mM + Insulin 10000 ng/ml	0.631832	0.445844	0.57806	0.648035	0.589979	0.466995	0.610961	0.516892	0.533651	0.733629	0.476958	0.607897	0.558834	0.635255	0.697152	0.687624	0.58707	0.545147	0.546546	0.65642	0.596987	0.426008	0.739026	0.527436	0.529578	0.505448	0.580748	0.623077	0.631238	0.462873	0.646112	0.608595	0.570099	0.6636	0.565133	0.629092	0.475694	0.554692	0.61557	0.464015	0.562241	0.501272	0.573354	0.614429	0.488858	0.626421	0.678399
Cell_0022	TFEB_TR	Glucose 17 mM + Glutamine 2.500000e-01 mM + Insulin 10000 ng/ml	1.13686	1.71788	2.47844	1.32646	1.38442	1.24855	1.49407	1.66093	1.66872	0.727541	1.36485	1.52046	1.47766	1.69267	0.847838	1.39482	1.40099	0.886022	2.33499	0.548591	0.928946	1.43353	0.891295	1.652	2.43574	1.61938	0.49746	1.46329	1.37363	2.50254	1.79305	1.10062	2.07847	1.23129	2.19012	1.30613	1.50127	1.68173	1.01485	1.18559	1.06595	0.770689	0.654406	1.7577	1.5393	0.922365	1.09346
Cell_0022	FOXO_TR	Glucose 17 mM + Glutamine 2.500000e-01 mM + Insulin 10000 ng/ml	1.83036	1.67388	2.8846	3.23176	1.29888	1.46127	1.03214	2.67925	2.84074	1.22832	1.42689	1.89198	1.79234	2.26751	1.44121	1.85975	2.01411	1.84831	3.46407	1.27356	1.52838	1.16611	1.66637	2.43482	3.65674	2.42909	1.08724	1.5286	2.72109	2.17539	2.4207	1.73841	1.30446	2.62991	2.98483	2.24656	1.53767	1.59709	2.50359	2.34076	1.14749	1.34386	1.41914	2.21469	2.30387	1.70842	1.77839
Cell_0022	AMPKARt2	Glucose 17 mM + Glutamine 2.500000e-01 mM + Insulin 10000 ng/ml	0.617299	0.444474	0.594454	0.636373	0.591915	0.474242	0.611082	0.503471	0.540109	0.734661	0.498026	0.596494	0.563123	0.637924	0.703744	0.6864	0.589449	0.545063	0.536352	0.662257	0.587672	0.435881	0.739059	0.531691	0.535054	0.517567	0.574767	0.636595	0.609996	0.463797	0.644854	0.62619	0.585409	0.662803	0.577915	0.634331	0.467847	0.53979	0.623263	0.469291	0.553544	0.489928	0.59643	0.611877	0.489254	0.622599	0.691004
Cell_0023	TFEB_TR	Glucose 17 mM + Glutamine 2.500000e-01 mM + Insulin 10000 ng/ml	1.20688	1.74796	2.47712	1.26043	1.2486	1.18908	1.52269	1.64383	1.3221	0.727491	1.44575	1.59785	1.16501	1.40113	0.864426	1.74349	1.50311	0.881963	2.58184	0.527228	0.960353	1.43576	0.947669	1.67866	1.2372	1.68016	0.48662	1.19522	1.48506	2.62342	1.85864	0.987811	2.22569	1.37613	1.9373	1.5972	1.58875	1.68865	1.86598	1.10925	0.978717	0.763734	0.642703	1.7053	1.45516	0.838982	1.0732
Cell_0023	FOXO_TR	Glucose 17 mM + Glutamine 2.500000e-01 mM + Insulin 10000 ng/ml	1.83911	1.75569	2.84096	3.09915	1.28273	1.41991	1.03588	2.67746	2.80357	1.25177	1.41808	1.82389	1.82655	2.18552	1.4574	1.79018	2.00303	1.76146	3.41778	1.23505	1.47848	1.20012	2.40173	2.37434	1.18008	2.4924	1.15816	1.45552	2.92935	2.1708	2.46778	1.64086	1.31845	2.60741	2.9206	2.34587	1.49386	1.62218	2.52585	2.20738	1.12672	1.32914	1.40975	2.31044	2.22321	1.63674	1.73875
Cell_0023	AMPKARt2	Glucose 17 mM + Glutamine 2.500000e-01 mM + Insulin 10000 ng/ml	0.606384	0.446643	0.595934	0.629537	0.590091	0.458076	0.6206	0.49873	0.543903	0.743551	0.528499	0.590824	0.569501	0.636721	0.707543	0.680697	0.594749	0.546855	0.552485	0.669638	0.557009	0.447668	0.729707	0.537684	0.540518	0.497473	0.571096	0.648653	0.595939	0.455901	0.642688	0.621639	0.592233	0.647568	0.587763	0.626759	0.443924	0.546201	0.621703	0.465245	0.549372	0.493454	0.589904	0.643552	0.484424	0.631711	0.700713
Cell_0024	TFEB_TR	Glucose 17 mM + Glutamine 2.500000e-01 mM + Insulin 10000 ng/ml	1.29353	1.84879	2.5002	1.40277	1.19088	1.05455	1.57831	1.72817	1.35778	0.730838	1.35544	1.61819	1.4788	1.77132	0.893683	1.88644	1.52899	0.849374	1.96345	0.508137	1.10244	1.37503	1.10933	1.69767	1.27828	1.81482	0.534803	1.1682	1.64383	2.59234	1.96903	0.956864	2.26416	1.33486	1.91279	1.67702	1.69633	1.59077	2.37847	1.20782	1.0452	0.791283	0.622627	1.51859	1.23529	0.664747	1.21769
Cell_0024	FOXO_TR	Glucose 17 mM + Glutamine 2.500000e-01 mM + Insulin 10000 ng/ml	1.99006	1.79363	2.8484	3.10962	1.30286	1.34496	1.02497	2.9169	2.7417	1.30366	1.38233	1.80112	1.89607	2.16033	1.47391	1.80151	1.98261	1.68319	3.57108	1.21001	1.47933	1.17963	2.93235	2.42649	1.19598	2.58214	1.20404	1.77708	2.93465	2.25578	2.46894	1.61844	1.24605	2.60775	2.90052	2.32985	1.46798	1.57626	2.61962	2.10861	1.13071	1.25971	1.45306	2.33296	2.13871	1.52066	1.76277
Cell_0024	AMPKARt2	Glucose 17 mM + Glutamine 2.500000e-01 mM + Insulin 10000 ng/ml	0.619862	0.438748	0.574129	0.641087	0.589417	0.440387	0.631376	0.509505	0.530552	0.743209	0.549958	0.602089	0.5688	0.642353	0.706515	0.676058	0.591936	0.547566	0.562706	0.683393	0.537926	0.448643	0.709139	0.52515	0.55379	0.423378	0.580204	0.65077	0.600166	0.453888	0.640251	0.618612	0.58889	0.645412	0.58374	0.619642	0.431338	0.563063	0.600505	0.446982	0.555492	0.514375	0.592341	0.664126	0.489437	0.623825	0.691575
Cell_0025	TFEB_TR	Glucose 17 mM + Glutamine 2.500000e-01 mM + Insulin 10000 ng/ml	1.21673	2.02412	2.4513	1.41411	1.32118	1.14102	1.55187	1.78188	1.50466	0.725965	1.2576	1.431	1.507	1.98838	1.04869	1.82967	1.47473	0.871479	1.48645	0.51201	1.1584	1.32294	1.23684	1.49186	1.30512	1.77001	0.565217	1.34772	2.03634	1.3698	2.09791	0.889892	2.12344	1.29266	1.93388	1.47557	1.76613	1.75926	1.59557	1.30002	1.16473	0.845204	0.599317	1.81682	1.18793	1.04089	1.48343
Cell_0025	FOXO_TR	Glucose 17 mM + Glutamine 2.500000e-01 mM + Insulin 10000 ng/ml	2.08388	1.88267	2.7961	3.12777	1.32917	1.26568	1.05072	3.02265	2.72531	1.35751	1.28522	1.72814	2.03962	2.15503	1.55889	1.80113	1.92342	1.696	3.6568	1.23184	1.46371	1.13224	2.90982	2.47112	1.18359	2.44565	1.17241	2.26775	2.69549	1.98272	2.56132	1.61958	1.24628	2.73099	2.92265	2.22207	1.43514	1.63093	2.69385	2.09695	1.18004	1.16836	1.45319	2.36215	2.2197	1.45153	1.80896
Cell_0025	AMPKARt2	Glucose 17 mM + Glutamine 2.500000e-01 mM + Insulin 10000 ng/ml	0.631643	0.425106	0.566101	0.641022	0.588869	0.439702	0.627739	0.519056	0.535362	0.740367	0.561987	0.59492	0.561593	0.649875	0.7053	0.676072	0.587402	0.544324	0.545997	0.694798	0.554267	0.436476	0.70215	0.505439	0.53902	0.387732	0.596848	0.639333	0.594415	0.570334	0.620436	0.627203	0.601724	0.657702	0.576408	0.618033	0.429871	0.563802	0.593302	0.450905	0.565506	0.517143	0.612855	0.653835	0.493367	0.605089	0.681207
Cell_0026	TFEB_TR	Glucose 17 mM + Glutamine 2.500000e-01 mM + Insulin 10000 ng/ml	1.13375	2.25475	2.38265	1.29054	1.33485	1.20533	1.53252	1.74002	1.31779	0.707422	1.31306	1.38687	1.34965	1.71905	1.09606	2.00102	1.42915	0.911282	1.9023	0.509736	1.32959	1.33134	1.25759	1.91638	1.12846	1.57821	0.537214	1.44804	2.3545	1.49921	1.9969	0.84194	2.2026	1.3736	2.03289	1.1168	1.82846	2.03768	1.59475	1.24455	1.09974	0.874262	0.60717	2.0172	1.17688	1.77786	1.5525
Cell_0026	FOXO_TR	Glucose 17 mM + Glutamine 2.500000e-01 mM + Insulin 10000 ng/ml	2.02983	2.38604	2.71787	3.045	1.32611	1.22165	1.04341	2.95082	2.68661	1.38162	1.22339	1.69325	2.13003	2.13686	1.61196	1.74246	1.82071	1.76251	3.61542	1.24428	1.41053	1.13155	2.73676	2.46906	1.17375	2.13726	1.13731	2.30291	2.59341	1.94241	2.62924	1.61194	1.64387	2.83995	2.95846	2.16587	1.40865	1.67771	2.6509	2.02979	1.18497	1.08963	1.43488	2.41454	2.28785	1.43485	1.79474
Cell_0026	AMPKARt2	Glucose 17 mM + Glutamine 2.500000e-01 mM + Insulin 10000 ng/ml	0.634444	0.420647	0.571741	0.63927	0.594871	0.438879	0.622924	0.509295	0.551811	0.738236	0.558021	0.595014	0.544093	0.645538	0.709698	0.681627	0.584434	0.543016	0.53992	0.694762	0.557499	0.433856	0.701961	0.500241	0.541183	0.399489	0.605563	0.645992	0.597755	0.586415	0.593269	0.617218	0.621553	0.661467	0.58114	0.628191	0.437199	0.563341	0.595916	0.474585	0.575	0.496751	0.613768	0.648775	0.498224	0.607525	0.686287
Cell_0027	TFEB_TR	Glucose 17 mM + Glutamine 2.500000e-01 mM + Insulin 10000 ng/ml	1.24467	2.50297	2.37822	1.30522	1.31344	1.05227	1.71769	1.76993	1.24957	0.678018	1.32642	1.43888	1.51609	1.88556	0.968352	2.12824	1.46957	0.899081	2.37352	0.514628	1.67706	1.36126	1.29952	2.51955	1.08614	1.45728	0.512418	1.3855	2.24085	1.31822	1.82521	1.09777	2.41076	1.48807	1.07741	1.23356	1.78728	2.18785	2.64461	1.14248	0.969214	0.851542	0.6147	1.72542	1.28837	1.80873	1.43301
Cell_0027	FOXO_TR	Glucose 17 mM + Glutamine 2.500000e-01 mM + Insulin 10000 ng/ml	2.09201	3.09158	2.76461	1.86063	1.34334	1.20382	1.11022	3.07176	2.58233	1.3525	1.2633	1.65986	2.10395	2.14983	1.63062	1.70538	1.7927	1.81096	3.60395	1.24667	1.40008	1.16721	2.81653	2.42673	1.17796	1.81014	1.14442	2.08096	2.69882	1.86871	2.53722	1.60213	2.28997	2.80001	1.97749	2.16792	1.3945	1.67609	2.62806	1.98773	1.11755	1.03321	1.48034	2.41154	2.25698	1.40771	1.67847
Cell_0027	AMPKARt2	Glucose 17 mM + Glutamine 2.500000e-01 mM + Insulin 10000 ng/ml	0.645907	0.411131	0.564121	0.636157	0.612417	0.452462	0.643838	0.504839	0.533137	0.736364	0.546338	0.612326	0.534399	0.632276	0.715659	0.681893	0.586257	0.538399	0.536146	0.688645	0.526746	0.445951	0.698393	0.50988	0.561333	0.393812	0.604653	0.671958	0.62956	0.595424	0.577704	0.594418	0.604421	0.651432	0.419163	0.629774	0.446123	0.575928	0.596066	0.469759	0.57705	0.48844	0.602803	0.658409	0.500954	0.625681	0.685458
Cell_0028	TFEB_TR	Glucose 17 mM + Glutamine 2.500000e-01 mM + Insulin 10000 ng/ml	1.30954	2.67481	2.37365	1.44658	1.37666	0.986467	1.93711	1.85788	1.53008	0.682287	1.25965	1.27204	1.45916	1.99134	1.09542	1.96246	1.48947	0.905602	2.29884	0.534396	1.75608	1.36233	1.43703	2.04612	1.34591	1.40287	0.479301	1.33315	2.02517	1.21841	1.98448	1.43529	2.32572	1.51782	1.15743	1.52193	1.80791	2.19505	2.28729	1.11983	0.967315	0.847804	0.592298	1.54481	1.52985	1.27359	1.42741
Cell_0028	FOXO_TR	Glucose 17 mM + Glutamine 2.500000e-01 mM + Insulin 10000 ng/ml	2.17418	3.42973	2.80237	1.93425	1.36961	1.17603	1.56888	3.27374	2.52013	1.41141	1.30801	1.55862	2.13258	2.15699	1.6797	1.67513	1.88229	1.81468	3.51635	1.24863	1.41821	1.19019	3.03735	2.31043	1.16058	1.5082	1.12808	2.16748	2.74486	1.85395	2.4343	1.55981	2.65854	2.70945	1.96021	2.16035	1.36431	2.12816	2.71476	2.09339	1.10825	1.01933	1.42741	2.39872	2.2739	1.3245	1.57286
Cell_0028	AMPKARt2	Glucose 17 mM + Glutamine 2.500000e-01 mM + Insulin 10000 ng/ml	0.655334	0.389843	0.552858	0.663631	0.616186	0.489758	0.673571	0.517205	0.529125	0.740335	0.554116	0.61688	0.543149	0.620943	0.714032	0.672885	0.591057	0.529667	0.510781	0.681863	0.51255	0.463049	0.698574	0.520146	0.550943	0.365229	0.606019	0.675676	0.651753	0.611659	0.574995	0.599811	0.557274	0.643673	0.452714	0.613242	0.446035	0.577695	0.59914	0.450537	0.571392	0.507549	0.603901	0.657617	0.490743	0.634431	0.678801
Cell_0029	TFEB_TR	Glucose 17 mM + Glutamine 2.500000e-01 mM + Insulin 10000 ng/ml	1.20143	2.68491	2.34865	1.68643	1.3382	0.980863	1.91976	1.79114	0.988739	0.727281	1.25594	1.24457	1.24402	1.49986	1.11065	2.01182	1.41607	0.939036	1.96585	0.52917	1.65991	1.34197	1.54571	1.84211	1.29864	1.26483	0.452622	1.48893	1.97723	1.46803	2.21629	1.33309	2.20558	1.497	1.10238	1.19792	1.85238	2.21269	1.35523	1.60782	1.05564	0.940965	0.565928	1.73051	1.48532	1.17078	1.74836
Cell_0029	FOXO_TR	Glucose 17 mM + Glutamine 2.500000e-01 mM + Insulin 10000 ng/ml	2.04323	3.39417	2.71332	1.91661	1.36698	1.14815	2.19055	3.24274	1.83335	1.65884	1.25061	1.76729	2.21466	2.13368	1.65901	1.62075	1.8857	1.7804	3.34076	1.25481	1.409	1.17114	3.13027	2.2252	1.11846	1.24615	1.06425	2.38781	2.67718	1.9524	2.38803	1.50073	2.6671	2.69354	1.88541	2.16752	1.30549	2.95426	2.86417	2.41443	1.18462	1.06121	1.3931	2.44058	2.3086	1.24692	1.62455
Cell_0029	AMPKARt2	Glucose 17 mM + Glutamine 2.500000e-01 mM + Insulin 10000 ng/ml	0.645176	0.388135	0.550323	0.653696	0.588223	0.517299	0.682002	0.511542	0.627628	0.739117	0.572513	0.627349	0.546711	0.621127	0.70519	0.672022	0.583889	0.531546	0.504785	0.679099	0.519791	0.476924	0.688711	0.514934	0.53046	0.356418	0.610004	0.657591	0.648073	0.62039	0.590891	0.62426	0.531657	0.642626	0.442098	0.612216	0.493825	0.560098	0.59758	0.641939	0.564672	0.517937	0.606825	0.648851	0.493991	0.630253	0.686612
Cell_0030	TFEB_TR	Glucose 17 mM + Glutamine 2.500000e-01 mM + Insulin 10000 ng/ml	1.21508	2.63858	2.35577	1.66341	1.33483	0.905554	1.78451	1.70462	1.15983	0.737458	1.27733	1.72394	1.42135	1.41419	0.937114	2.19804	1.40327	0.919181	1.88433	0.512436	1.78335	1.35524	1.55438	3.03573	1.08075	1.09758	0.503135	1.60062	1.74687	1.5628	2.14314	1.03925	2.28517	1.50115	1.23323	0.947175	1.64138	2.22235	1.70501	1.50023	1.10079	1.00526	0.564122	1.78661	1.19006	1.29889	2.12707
Cell_0030	FOXO_TR	Glucose 17 mM + Glutamine 2.500000e-01 mM + Insulin 10000 ng/ml	1.97376	3.2869	2.68581	2.17517	1.38697	1.15347	2.43014	3.15497	1.86627	1.83382	1.19501	2.41685	2.19145	2.23101	1.63651	1.62527	1.81582	1.73787	3.2803	1.30373	1.41142	1.18496	3.05563	2.21874	1.10036	1.04273	1.07988	2.47262	2.61767	2.0436	2.24276	1.49964	2.59044	2.72729	1.84974	2.14428	1.26242	3.32221	3.05687	2.50018	1.19952	1.10134	1.82362	2.5133	2.31842	1.24734	1.7291
Cell_0030	AMPKARt2	Glucose 17 mM + Glutamine 2.500000e-01 mM + Insulin 10000 ng/ml	0.634611	0.403515	0.545623	0.644299	0.564296	0.523027	0.677218	0.490485	0.638234	0.719126	0.580935	0.632165	0.54066	0.629951	0.697612	0.68269	0.576134	0.531471	0.522192	0.686683	0.514799	0.472601	0.678247	0.500482	0.53872	0.384025	0.608501	0.645095	0.640979	0.605001	0.608841	0.63103	0.536834	0.641036	0.425984	0.611389	0.606887	0.548749	0.584136	0.670364	0.556438	0.499657	0.601093	0.64806	0.522225	0.627706	0.688849
Cell_0031	TFEB_TR	Glucose 17 mM + Glutamine 2.500000e-01 mM + Insulin 10000 ng/ml	1.34645	2.66383	2.35851	1.47394	1.5703	1.00463	1.78165	1.82071	1.06864	0.725211	1.36954	2.27417	1.60496	0.810981	1.61884	2.03733	1.47007	0.912177	1.88062	0.529492	1.88264	1.40078	1.60169	3.33338	1.3194	1.11781	0.560585	1.38733	1.26892	1.37095	2.05231	1.01907	2.37939	1.57432	1.40162	1.31337	1.41441	2.08288	2.01844	1.59958	1.04322	0.890135	0.586379	1.65794	0.991242	1.09914	2.06244
Cell_0031	FOXO_TR	Glucose 17 mM + Glutamine 2.500000e-01 mM + Insulin 10000 ng/ml	2.08659	3.2061	2.74541	2.57846	1.43685	1.17501	2.41517	3.19338	1.83393	1.73339	1.26067	2.97361	2.17018	0.975544	1.75999	1.66483	2.01334	1.7449	3.38903	1.36117	1.41873	1.24394	2.96764	2.17422	1.12673	0.961648	1.15504	2.59594	2.57835	2.04391	2.02787	1.5694	2.525	2.77407	1.8885	2.06093	1.24981	3.10926	3.14678	2.51295	1.12753	1.06888	2.41878	2.57652	1.3502	1.25823	1.69497
Cell_0031	AMPKARt2	Glucose 17 mM + Glutamine 2.500000e-01 mM + Insulin 10000 ng/ml	0.64199	0.398951	0.541554	0.652559	0.572725	0.522974	0.674157	0.487776	0.65382	0.696696	0.592857	0.576942	0.540356	0.591894	0.692291	0.685939	0.60069	0.515405	0.515272	0.697432	0.511946	0.461331	0.687969	0.501185	0.548278	0.40437	0.607524	0.635984	0.639107	0.59524	0.594907	0.631411	0.539154	0.64101	0.447453	0.574725	0.678206	0.551063	0.574192	0.670379	0.543129	0.496767	0.584003	0.648836	0.568328	0.624766	0.676392
Cell_0032	TFEB_TR	Glucose 17 mM + Glutamine 2.500000e-01 mM + Insulin 10000 ng/ml	1.29867	2.68355	2.34996	1.56374	1.72227	1.19316	1.87706	1.91973	0.996857	0.793976	1.56521	2.4501	1.82465	0.738274	2.52045	1.95459	1.53457	0.977919	1.27357	0.554251	1.85031	1.41863	1.71109	2.03039	1.42208	1.26336	0.536487	1.1793	1.22696	1.3279	2.11627	1.01883	2.6545	1.84185	1.20045	1.47847	1.40118	1.97079	1.45938	1.63302	0.978843	0.740405	0.643372	1.84333	0.973601	0.918154	1.73992
Cell_0032	FOXO_TR	Glucose 17 mM + Glutamine 2.500000e-01 mM + Insulin 10000 ng/ml	2.06188	3.2307	2.71864	2.61126	1.43579	1.15116	2.49705	3.20012	1.81322	1.58218	1.3303	3.17285	2.25846	0.985912	1.83875	1.62901	2.4298	1.78342	3.58379	1.37067	1.39353	1.16278	2.93685	2.12582	1.15024	0.993441	1.17795	2.71401	2.58624	2.05693	1.94334	1.60616	2.56618	2.84732	1.87631	2.03211	1.22909	2.85047	3.01433	2.42168	1.07717	1.01058	2.5496	2.6394	1.29269	1.21797	1.56551
Cell_0032	AMPKARt2	Glucose 17 mM + Glutamine 2.500000e-01 mM + Insulin 10000 ng/ml	0.645281	0.389726	0.547369	0.654443	0.579336	0.531499	0.669756	0.490358	0.650614	0.693427	0.600355	0.510842	0.534658	0.582671	0.684297	0.67867	0.628608	0.510842	0.500327	0.695473	0.519225	0.473192	0.693157	0.508846	0.540174	0.387128	0.606176	0.628326	0.646913	0.606458	0.575787	0.63944	0.528613	0.643822	0.467816	0.552261	0.681531	0.54939	0.574755	0.665086	0.534206	0.526798	0.558292	0.645212	0.556151	0.602063	0.680302
Cell_0033	TFEB_TR	Glucose 17 mM + Glutamine 2.500000e-01 mM + Insulin 10000 ng/ml	1.16334	2.65908	2.3954	1.63572	1.57736	1.1464	1.87398	1.80445	1.01402	0.923223	1.59356	2.55215	2.37485	0.791907	2.05894	2.17033	1.61179	1.02582	0.909615	0.557814	1.89246	1.42734	1.72603	1.49806	1.02194	1.26379	0.50311	1.21618	1.88535	1.35806	2.18335	0.893891	3.09782	2.14198	0.971223	1.32499	1.38692	1.9752	1.29917	1.60304	0.978924	0.744382	0.737964	2.15415	0.944349	0.92873	1.66931
Cell_0033	FOXO_TR	Glucose 17 mM + Glutamine 2.500000e-01 mM + Insulin 10000 ng/ml	1.89309	3.35929	2.67244	2.45893	1.39367	1.10674	2.53869	3.15881	1.8084	1.56189	1.29338	3.21126	2.31793	0.972212	1.73704	1.56875	2.67806	1.78935	1.52466	1.38817	1.37401	1.14994	2.94739	2.16897	1.15082	1.06475	1.21928	2.65165	2.63973	2.11964	1.95036	1.53529	2.79073	2.90818	1.79722	2.09334	1.22785	2.72568	2.9188	2.30985	1.05254	1.01489	2.47053	2.66576	1.30028	1.18094	1.46928
Cell_0033	AMPKARt2	Glucose 17 mM + Glutamine 2.500000e-01 mM + Insulin 10000 ng/ml	0.638953	0.405683	0.551513	0.649257	0.562456	0.5485	0.664128	0.484447	0.635016	0.698891	0.582148	0.510305	0.520401	0.588555	0.677979	0.673777	0.602772	0.523194	0.609148	0.681081	0.515642	0.492483	0.685707	0.502162	0.540953	0.377377	0.58884	0.629781	0.657699	0.607197	0.589715	0.637874	0.520299	0.643843	0.447956	0.571713	0.691091	0.538751	0.563451	0.661748	0.541815	0.541508	0.547483	0.644401	0.569344	0.570606	0.694053
Cell_0034	TFEB_TR	Glucose 17 mM + Glutamine 2.500000e-01 mM + Insulin 10000 ng/ml	1.15972	2.68178	2.45795	1.40911	1.43893	1.03676	1.78273	1.69097	0.981055	1.00493	1.42914	2.66085	2.35987	0.92461	1.15854	2.0847	1.68061	1.03599	0.962297	0.559687	1.7891	1.51822	1.73538	1.80393	0.908853	1.20921	0.517434	1.28175	2.30709	1.39303	2.33051	0.95963	3.1489	1.95222	1.07432	1.33363	1.31772	1.91268	1.77725	1.73678	0.932419	0.817281	0.798687	1.98118	0.99531	0.873198	1.72083
Cell_0034	FOXO_TR	Glucose 17 mM + Glutamine 2.500000e-01 mM + Insulin 10000 ng/ml	1.81869	3.38496	2.71777	2.50728	1.37794	1.12502	2.47182	3.24738	1.74081	1.55986	1.23197	3.1688	2.31985	0.961433	1.64087	1.53386	2.65958	1.78645	1.56413	1.42411	1.34725	1.73742	3.0699	2.18315	1.18203	1.2092	1.15536	2.58359	2.60529	2.10442	1.87576	1.45893	2.96194	2.84807	1.79898	2.19737	1.24225	2.70012	3.01526	2.2677	1.01144	1.04057	2.50932	2.55243	1.33986	1.15838	1.42876
Cell_0034	AMPKARt2	Glucose 17 mM + Glutamine 2.500000e-01 mM + Insulin 10000 ng/ml	0.650515	0.424545	0.544144	0.647678	0.56001	0.54612	0.662828	0.491217	0.62996	0.692588	0.572737	0.539539	0.521174	0.603292	0.674237	0.679129	0.561555	0.523552	0.616761	0.669205	0.516535	0.482847	0.684924	0.495873	0.553261	0.40322	0.575835	0.629584	0.651148	0.594524	0.596107	0.634971	0.513471	0.641699	0.435008	0.572613	0.694799	0.532118	0.537992	0.657661	0.552409	0.528121	0.5589	0.647499	0.586513	0.555867	0.689954
Cell_0035	TFEB_TR	Glucose 17 mM + Glutamine 2.500000e-01 mM + Insulin 10000 ng/ml	1.20268	2.73892	2.4613	1.41265	1.47833	1.05463	1.80713	1.73234	1.04373	1.04223	1.35548	2.40325	1.63275	0.978165	1.12638	1.83453	1.75536	1.05841	0.921824	0.556492	1.59777	1.73591	1.84961	1.16178	1.09515	1.30309	0.525874	1.50505	2.00048	1.62063	2.495	1.12259	2.88098	1.45315	1.19871	1.22221	1.34052	1.80546	1.75929	1.77368	0.85241	0.838776	0.781531	1.65003	1.06788	0.93662	1.64957
Cell_0035	FOXO_TR	Glucose 17 mM + Glutamine 2.500000e-01 mM + Insulin 10000 ng/ml	1.80241	3.31087	2.74682	2.56145	1.35687	1.14032	2.51036	3.42802	1.72038	1.54137	1.19564	3.13721	2.34524	0.963835	1.61868	1.47719	2.47752	1.78008	1.53855	1.38989	1.29999	2.66535	3.21948	1.80971	1.25113	1.35473	1.00089	2.60543	2.4953	2.02849	1.74812	1.42996	2.9536	2.6679	1.88257	2.24694	1.20209	2.78257	3.03433	2.2331	0.982136	1.0329	2.45585	2.41883	1.38217	1.11206	1.43437
Cell_0035	AMPKARt2	Glucose 17 mM + Glutamine 2.500000e-01 mM + Insulin 10000 ng/ml	0.659016	0.424394	0.537119	0.649456	0.585129	0.525029	0.661881	0.503469	0.636192	0.685264	0.588968	0.552268	0.536549	0.611995	0.664566	0.692354	0.571387	0.520267	0.606886	0.661618	0.535583	0.452322	0.68332	0.618335	0.550447	0.421703	0.598115	0.619576	0.644551	0.607744	0.568594	0.644296	0.504466	0.637508	0.45959	0.558552	0.680167	0.535843	0.538602	0.673407	0.548865	0.524348	0.562191	0.649623	0.578808	0.546285	0.683884
Cell_0036	TFEB_TR	Glucose 17 mM + Glutamine 2.500000e-01 mM + Insulin 10000 ng/ml	1.2453	2.76969	2.41407	1.61654	1.52615	1.02233	1.92711	1.77607	1.18263	1.10796	1.35993	2.39036	1.40001	0.930879	1.25309	1.99798	1.81476	1.0489	0.857256	0.54993	1.71146	2.00125	1.84343	1.08092	1.14844	1.35003	0.504398	1.86692	1.82077	1.71056	2.40896	1.07636	2.79032	1.42658	1.20212	0.979785	1.48804	1.77279	1.37908	1.5909	0.907679	0.838917	0.780155	1.7476	1.09122	1.22906	1.60381
Cell_0036	FOXO_TR	Glucose 17 mM + Glutamine 2.500000e-01 mM + Insulin 10000 ng/ml	1.7966	3.35309	2.70606	2.43367	1.29751	1.10284	2.62114	3.50974	1.84957	1.60747	1.1589	3.30786	2.35888	0.954961	1.5601	1.44412	2.3044	1.70962	1.50092	1.31937	1.31327	3.15513	3.19307	1.86689	1.29719	1.35491	1.37462	2.57204	2.47234	2.05205	1.64568	1.34895	2.95199	2.57039	1.8932	2.11042	1.21056	2.86399	2.93809	2.17338	0.966738	1.03598	2.43453	2.48495	1.42895	1.05621	1.4587
Cell_0036	AMPKARt2	Glucose 17 mM + Glutamine 2.500000e-01 mM + Insulin 10000 ng/ml	0.639464	0.41489	0.541731	0.646451	0.600987	0.529233	0.654636	0.497767	0.655257	0.692451	0.585523	0.560857	0.543166	0.617051	0.659875	0.69763	0.597847	0.528154	0.603453	0.648564	0.545885	0.429765	0.680769	0.62513	0.529221	0.403875	0.615114	0.61245	0.659643	0.635231	0.559017	0.649992	0.500266	0.632195	0.471524	0.588111	0.694711	0.534714	0.568284	0.688109	0.541653	0.537472	0.551519	0.651524	0.570814	0.533755	0.693337
Cell_0037	TFEB_TR	Glucose 17 mM + Glutamine 2.500000e-01 mM + Insulin 10000 ng/ml	1.3637	2.76635	2.35737	1.40919	1.4884	0.985205	1.91498	1.71935	1.19212	1.19391	1.34473	3.03434	1.58846	0.915715	1.07197	2.19386	1.76316	0.993041	0.877174	0.568093	1.80966	2.1325	1.72541	1.17331	1.25614	1.29903	0.499624	1.67978	1.03419	1.62155	2.09641	0.987576	2.64304	1.68682	1.24727	1.08233	1.52242	1.90094	1.69074	1.68399	1.01612	0.84366	0.846088	1.94784	1.11626	1.33414	1.64586
Cell_0037	FOXO_TR	Glucose 17 mM + Glutamine 2.500000e-01 mM + Insulin 10000 ng/ml	1.94755	3.425	2.66458	2.29927	1.25445	1.10336	2.5959	3.45458	1.92029	1.70996	1.15327	3.57575	2.34926	0.939792	1.46189	1.45963	2.32195	1.64045	1.50658	1.30417	1.35318	3.08125	3.1221	1.88702	1.29714	1.34437	2.04033	2.51974	1.13141	2.15387	1.5443	1.38808	2.92334	2.63999	1.83349	1.93721	1.27353	2.8401	2.97891	2.19715	0.936833	1.03908	2.57212	2.5923	1.45693	1.01369	1.47658
Cell_0037	AMPKARt2	Glucose 17 mM + Glutamine 2.500000e-01 mM + Insulin 10000 ng/ml	0.64608	0.411387	0.551881	0.638707	0.602114	0.552775	0.645215	0.484227	0.666349	0.695541	0.562086	0.570775	0.533383	0.620736	0.672539	0.691864	0.592444	0.524714	0.617157	0.639423	0.544734	0.419987	0.68487	0.621941	0.517744	0.373575	0.581194	0.614212	0.65041	0.625751	0.574705	0.650015	0.491848	0.636353	0.463465	0.629979	0.708116	0.519444	0.570159	0.670327	0.539569	0.545726	0.557468	0.656073	0.579248	0.536977	0.704885
Cell_0038	TFEB_TR	Glucose 17 mM + Glutamine 2.500000e-01 mM + Insulin 10000 ng/ml	1.46611	2.74891	2.33975	1.23657	1.40263	1.09183	1.83072	1.67572	1.16794	1.2729	1.38952	3.17982	1.41449	0.972609	0.910143	2.03823	1.7126	0.985383	0.947415	0.585706	1.62425	2.12319	1.76728	1.20695	1.23877	1.41759	0.548304	1.38041	1.11824	1.77619	1.85925	1.06954	2.30907	1.62347	1.25382	1.35272	1.23677	2.11377	1.95425	2.11565	0.98071	0.844217	0.881693	1.85042	1.1129	1.18834	1.67714
Cell_0038	FOXO_TR	Glucose 17 mM + Glutamine 2.500000e-01 mM + Insulin 10000 ng/ml	2.29481	3.36203	2.63667	2.27429	1.24332	1.05048	2.45725	3.35299	1.8149	1.70249	1.1937	3.6498	2.34704	0.946423	1.39904	1.44746	2.42707	1.68076	1.53624	1.29073	1.31459	2.90767	3.15622	1.82217	1.25711	1.4602	1.97085	2.52661	1.11983	2.21006	1.48147	1.8393	2.76553	2.68661	1.82723	1.91977	1.16375	2.7532	3.0886	2.25678	0.918522	1.03624	2.53551	2.52569	1.47717	0.98794	1.51627
Cell_0038	AMPKARt2	Glucose 17 mM + Glutamine 2.500000e-01 mM + Insulin 10000 ng/ml	0.676202	0.419908	0.564461	0.642128	0.60584	0.555839	0.642664	0.478305	0.644183	0.689774	0.558151	0.575291	0.52757	0.613767	0.677505	0.695148	0.578492	0.513394	0.627207	0.645546	0.556034	0.414667	0.681297	0.626856	0.529924	0.352306	0.536788	0.619234	0.654397	0.597073	0.562626	0.64477	0.478675	0.645715	0.47064	0.630531	0.697198	0.511001	0.542967	0.661919	0.539247	0.543244	0.57005	0.661208	0.56859	0.543748	0.707219
Cell_0039	TFEB_TR	Glucose 17 mM + Glutamine 2.500000e-01 mM + Insulin 10000 ng/ml	1.51178	2.80089	0.980409	1.63242	1.32429	1.15144	1.88364	1.70595	1.2205	1.37744	1.44266	2.72233	1.39542	1.00316	0.820618	1.98784	1.74987	1.03043	0.963359	0.584003	1.59611	2.22362	1.84467	1.14542	1.0575	1.56663	0.61727	2.00538	0.873994	1.85027	2.04417	1.11679	2.34445	0.755296	1.19194	1.3931	1.06782	2.00122	1.32753	2.27565	0.863641	0.836622	0.870214	1.6615	1.09839	1.14453	1.69165
Cell_0039	FOXO_TR	Glucose 17 mM + Glutamine 2.500000e-01 mM + Insulin 10000 ng/ml	2.69234	3.33954	1.42198	2.28572	1.22608	1.01693	2.38028	3.33571	1.75538	1.598	1.25834	3.57152	2.33521	0.967808	1.41188	1.41821	2.48434	1.73378	1.55467	1.23432	1.27305	3.061	3.17052	1.74057	1.1844	1.58981	1.60171	2.51131	1.12521	2.20364	1.47301	2.41569	2.71538	1.85598	1.86713	1.92216	1.18966	2.68919	3.09829	2.22285	0.930837	1.08112	2.4342	2.45635	1.51485	0.970909	1.56136
Cell_0039	AMPKARt2	Glucose 17 mM + Glutamine 2.500000e-01 mM + Insulin 10000 ng/ml	0.62788	0.428279	0.543989	0.644051	0.602345	0.545987	0.651906	0.486208	0.62985	0.703544	0.567172	0.573763	0.547834	0.602928	0.65859	0.707713	0.571297	0.520333	0.626558	0.647258	0.567949	0.412026	0.674551	0.638489	0.537555	0.333153	0.525136	0.626481	0.649891	0.596136	0.542932	0.626914	0.483912	0.539149	0.466828	0.612341	0.715012	0.517283	0.552094	0.681651	0.541851	0.539642	0.555824	0.663679	0.549291	0.533179	0.705227
Cell_0040	TFEB_TR	Glucose 17 mM + Glutamine 2.500000e-01 mM + Insulin 10000 ng/ml	1.64526	2.89283	0.930825	1.93443	1.31204	1.08773	1.9872	1.68908	1.24917	1.43709	1.43539	2.61382	1.7757	1.00452	1.11896	2.10349	1.81389	1.02833	0.92811	0.60959	1.70435	2.47115	1.77539	1.1571	1.20436	1.49701	0.633896	2.44585	0.773464	1.60166	2.43785	0.997632	2.68941	0.947622	1.16069	1.31459	1.40709	1.59187	1.05565	2.03403	0.801011	0.798072	0.900063	1.55853	1.14467	1.17873	1.67724
Cell_0040	FOXO_TR	Glucose 17 mM + Glutamine 2.500000e-01 mM + Insulin 10000 ng/ml	2.93284	3.42912	1.42604	2.281	1.21012	1.54447	2.43698	3.48881	1.82544	1.53267	1.33308	3.60983	2.34139	0.965322	1.47823	1.43066	2.59182	1.70083	1.55215	1.21484	1.30498	3.42328	3.17516	1.74398	1.11072	1.66871	1.79027	2.48987	1.12853	2.14471	1.41229	2.63898	2.81998	1.85832	1.8656	1.9565	1.85841	2.63519	3.10986	2.21878	0.930835	1.07612	2.53527	2.50963	1.52466	0.96625	1.54952
Cell_0040	AMPKARt2	Glucose 17 mM + Glutamine 2.500000e-01 mM + Insulin 10000 ng/ml	0.515878	0.432704	0.53245	0.612373	0.59642	0.526669	0.66112	0.510547	0.643874	0.727685	0.576777	0.568355	0.566361	0.598885	0.647636	0.712975	0.559548	0.526031	0.622883	0.635705	0.558049	0.407592	0.672752	0.638317	0.523707	0.324965	0.534962	0.625991	0.656984	0.604992	0.569139	0.620679	0.494327	0.550257	0.43699	0.606437	0.706053	0.514011	0.586986	0.670661	0.541487	0.542787	0.542036	0.666232	0.567341	0.532675	0.703295
Cell_0041	TFEB_TR	Glucose 17 mM + Glutamine 2.500000e-01 mM + Insulin 10000 ng/ml	1.75627	2.84718	0.977453	1.85409	1.30673	1.04651	2.07693	0.578994	1.22236	1.34949	1.45703	2.55235	1.6981	1.05208	1.68868	1.90538	1.91008	0.992357	0.919192	0.649836	1.52764	2.63707	1.71554	1.14157	1.36115	1.45424	0.600651	1.71999	0.975629	1.54905	2.26576	0.977751	2.7409	0.824057	1.146	1.32084	1.74267	1.46116	1.9884	1.80571	0.785367	0.784966	0.946473	1.49999	1.13268	1.14081	1.59103
Cell_0041	FOXO_TR	Glucose 17 mM + Glutamine 2.500000e-01 mM + Insulin 10000 ng/ml	2.88489	3.42487	1.37992	2.31298	1.21388	2.49821	2.57636	1.28742	1.88013	1.54526	1.38659	3.71006	2.36796	0.942069	1.51299	1.46596	2.72486	1.66931	1.55159	1.23685	1.32461	3.50716	3.18932	1.80176	1.06394	1.72332	1.96677	2.52924	1.1345	2.06329	1.30779	2.60273	2.81985	1.95599	1.8037	2.13777	2.67134	2.54054	1.66452	2.29895	0.90083	1.08134	2.5251	2.5482	1.49018	0.998943	1.49378
Cell_0041	AMPKARt2	Glucose 17 mM + Glutamine 2.500000e-01 mM + Insulin 10000 ng/ml	0.454179	0.440512	0.526774	0.565502	0.599759	0.471328	0.645762	0.60271	0.634181	0.729004	0.592299	0.567167	0.557349	0.600976	0.660481	0.712909	0.556039	0.515124	0.613608	0.63585	0.551304	0.397567	0.656471	0.632957	0.512922	0.355302	0.552213	0.610633	0.671955	0.596176	0.603791	0.631415	0.486836	0.559374	0.418502	0.618664	0.596352	0.500585	0.560727	0.624821	0.538427	0.554754	0.555328	0.671645	0.593421	0.55637	0.694731
Cell_0042	TFEB_TR	Glucose 17 mM + Glutamine 2.500000e-01 mM + Insulin 10000 ng/ml	1.63474	2.70363	1.04277	1.79133	1.29355	1.00488	2.22673	0.579429	1.16552	1.27595	1.48897	2.62864	1.21933	1.06455	1.64578	1.6422	1.84408	0.978001	0.944452	0.654625	1.27083	2.69516	1.74331	1.06288	1.17677	1.57515	0.599902	1.37859	1.13929	1.63087	1.69984	1.16395	2.64828	0.775539	1.18996	1.3198	1.67147	1.60615	2.11907	1.74333	0.800871	0.885476	0.965673	1.43181	1.02377	1.19916	1.53256
Cell_0042	FOXO_TR	Glucose 17 mM + Glutamine 2.500000e-01 mM + Insulin 10000 ng/ml	2.6992	3.31941	1.61338	2.37273	1.2214	2.95338	2.65305	1.37395	1.90405	1.54753	1.49836	3.64407	2.35466	0.954155	1.51016	1.47119	2.73536	1.63341	1.56908	1.21228	1.32609	3.40147	3.10275	1.85928	1.05394	1.79781	1.8562	2.55796	1.17149	2.01088	1.2667	2.57467	2.78039	1.92264	1.719	2.19138	2.92717	2.48045	1.73236	2.25792	0.885935	1.51878	2.38639	2.53436	1.46459	1.02298	1.44684
Cell_0042	AMPKARt2	Glucose 17 mM + Glutamine 2.500000e-01 mM + Insulin 10000 ng/ml	0.440681	0.43358	0.572807	0.54284	0.590726	0.408534	0.620324	0.596552	0.613911	0.722275	0.592754	0.566672	0.566958	0.61806	0.669328	0.714326	0.562891	0.517355	0.601599	0.649023	0.571321	0.396678	0.639493	0.630964	0.515932	0.399972	0.562498	0.603212	0.663086	0.586554	0.602257	0.627513	0.488482	0.56932	0.415437	0.642936	0.504056	0.502421	0.579797	0.601499	0.547582	0.570664	0.556749	0.673454	0.589137	0.568875	0.689455
Cell_0043	TFEB_TR	Glucose 17 mM + Glutamine 2.500000e-01 mM + Insulin 10000 ng/ml	1.5442	2.66184	1.07578	1.62303	1.4479	0.993672	2.24981	0.553452	1.10532	1.32507	1.45233	3.18731	0.993673	0.95519	1.21642	1.85024	1.64077	0.940015	0.972664	0.659458	1.27115	2.7246	1.77296	1.09509	1.0879	1.64035	0.642288	1.89883	1.07975	1.55219	1.77072	1.32925	2.6915	0.806599	1.19352	1.14894	1.62319	1.60905	2.18428	1.87579	0.850398	1.01164	1.00237	1.51513	0.994125	1.34725	1.50986
Cell_0043	FOXO_TR	Glucose 17 mM + Glutamine 2.500000e-01 mM + Insulin 10000 ng/ml	2.63109	3.24852	2.1595	2.34813	1.21173	2.84957	2.54894	1.41242	1.90422	1.47466	1.82452	3.5474	1.42884	0.995687	1.56688	1.50329	2.65643	1.55868	1.595	1.1581	1.35992	3.42562	3.02683	1.91012	1.05495	1.95852	1.96829	2.55324	1.21145	1.95027	1.28316	2.57409	2.87044	1.76022	1.64784	2.04225	2.86387	2.48185	1.71904	2.12184	0.901293	2.32098	2.42397	1.42478	1.44904	0.991022	1.51765
Cell_0043	AMPKARt2	Glucose 17 mM + Glutamine 2.500000e-01 mM + Insulin 10000 ng/ml	0.42608	0.411563	0.618027	0.539689	0.575234	0.395686	0.626489	0.594692	0.632377	0.730206	0.557338	0.556438	0.535099	0.639738	0.668633	0.717397	0.561022	0.529365	0.604298	0.654869	0.585089	0.406232	0.653797	0.629719	0.523307	0.412265	0.557558	0.610777	0.643704	0.590389	0.597372	0.619487	0.505975	0.573583	0.416536	0.643721	0.502089	0.515563	0.581057	0.602286	0.560645	0.576764	0.538836	0.587982	0.575589	0.564674	0.709464
Cell_0044	TFEB_TR	Glucose 17 mM + Glutamine 2.500000e-01 mM + Insulin 10000 ng/ml	1.71564	2.70135	1.14662	1.43816	1.67908	1.11653	2.09886	0.541814	1.1242	1.27986	1.42471	3.17207	1.00212	0.85785	1.20978	2.18789	1.86772	0.911145	1.0029	0.679581	1.37526	2.7214	1.7301	1.19418	1.15461	1.66969	0.668162	1.8612	0.868602	1.69108	2.2747	1.40892	2.48863	0.785616	1.08843	0.975262	1.80796	1.52038	2.16219	2.21996	0.871631	1.0483	1.0316	1.42564	1.06926	1.27633	1.42161
Cell_0044	FOXO_TR	Glucose 17 mM + Glutamine 2.500000e-01 mM + Insulin 10000 ng/ml	2.66268	3.23153	2.42157	2.25697	1.1758	2.83376	2.43599	1.4045	1.8027	1.36896	2.27288	3.6151	1.39586	1.00325	1.63168	1.78166	2.57858	1.60427	1.64598	1.147	1.33677	3.37213	3.04419	1.91429	1.01158	2.1355	2.12062	2.62347	1.19905	1.8554	1.30745	2.63293	2.95833	1.75626	1.58617	2.06144	2.85952	2.39473	1.73058	2.08062	0.90958	2.78361	2.43505	1.40137	1.43068	0.981177	1.90762
Cell_0044	AMPKARt2	Glucose 17 mM + Glutamine 2.500000e-01 mM + Insulin 10000 ng/ml	0.432477	0.413593	0.570352	0.532049	0.578563	0.423587	0.649464	0.598017	0.644272	0.73453	0.499063	0.544503	0.535976	0.63275	0.677232	0.720767	0.560071	0.524261	0.612382	0.658289	0.579901	0.398774	0.670283	0.635182	0.537087	0.413019	0.555173	0.61102	0.651446	0.596517	0.603494	0.623722	0.507323	0.568948	0.426131	0.613477	0.48256	0.515919	0.579064	0.595031	0.561626	0.570997	0.536262	0.601932	0.55869	0.568577	0.729115
Cell_0045	TFEB_TR	Glucose 17 mM + Glutamine 2.500000e-01 mM + Insulin 10000 ng/ml	1.85008	2.67909	1.20457	1.65516	1.65719	1.19039	2.11132	0.554298	1.18288	1.1398	1.44371	2.71922	1.02458	0.908707	1.26583	2.1333	2.3471	1.3942	1.01709	0.662015	1.3775	2.79464	1.62011	1.21422	1.1704	1.80246	0.695623	1.40552	0.867632	1.93836	2.24234	1.39405	2.24046	1.00736	1.22967	1.06449	1.85057	1.47709	2.01432	2.2952	0.829657	1.03517	1.00751	1.74127	1.13619	1.0482	1.64711
Cell_0045	FOXO_TR	Glucose 17 mM + Glutamine 2.500000e-01 mM + Insulin 10000 ng/ml	2.68028	3.27605	2.12815	2.14812	1.14233	2.89446	2.52392	1.39973	1.6718	1.29249	2.56907	3.65136	1.41004	0.992681	1.54953	2.28664	2.53658	1.65628	1.71552	1.16019	1.3156	3.28453	3.06422	1.88725	0.94903	2.28781	2.09806	2.76165	1.15486	1.77606	1.29866	2.75934	2.99345	1.85348	1.51669	2.23763	2.93555	2.23421	1.74032	2.0353	0.905768	2.71702	2.37654	1.3893	1.45017	1.01036	2.55871
Cell_0045	AMPKARt2	Glucose 17 mM + Glutamine 2.500000e-01 mM + Insulin 10000 ng/ml	0.45218	0.442029	0.489044	0.517886	0.582155	0.455377	0.654198	0.607255	0.618636	0.725204	0.450825	0.541687	0.548634	0.60977	0.685556	0.71902	0.567765	0.725425	0.59895	0.664604	0.590009	0.385361	0.657757	0.642279	0.545922	0.428326	0.552948	0.611263	0.672899	0.594787	0.602109	0.617033	0.499577	0.562159	0.430649	0.604186	0.444782	0.507606	0.578486	0.577933	0.56478	0.57329	0.539741	0.607988	0.538592	0.571222	0.713664
Cell_0046	TFEB_TR	Glucose 17 mM + Glutamine 2.500000e-01 mM + Insulin 10000 ng/ml	1.85742	2.56309	1.16976	1.90998	1.44572	1.10584	2.28298	0.588942	1.18383	1.12779	1.42892	2.88356	1.06703	1.00092	1.0525	1.90603	2.38048	1.39283	1.00622	0.629058	1.36555	2.92295	1.60606	1.18802	1.10074	1.91013	0.736244	1.50465	1.13403	1.82315	1.91597	1.17506	2.74122	1.22332	1.48151	1.22811	1.80058	1.33704	1.70011	1.84618	0.770759	0.984149	0.974444	1.90596	1.14394	1.00515	2.27861
Cell_0046	FOXO_TR	Glucose 17 mM + Glutamine 2.500000e-01 mM + Insulin 10000 ng/ml	2.75199	3.30377	1.75424	1.94043	1.13962	2.80458	2.65235	1.42079	1.62048	1.2407	2.60622	3.54249	1.4181	0.992572	1.39026	2.60535	2.57689	1.72517	1.71833	1.15374	1.54419	3.41035	3.13152	1.92816	0.934548	2.5242	2.14891	2.81471	1.14362	1.71419	1.25433	2.84022	3.07074	1.83771	1.46481	2.27723	3.12472	2.20321	1.6529	1.90643	0.909587	2.58903	2.51357	1.40364	1.48392	0.996865	3.03747
Cell_0046	AMPKARt2	Glucose 17 mM + Glutamine 2.500000e-01 mM + Insulin 10000 ng/ml	0.449906	0.463982	0.475401	0.511629	0.581625	0.468891	0.654434	0.612253	0.604179	0.722019	0.44251	0.546242	0.560972	0.601458	0.68188	0.713844	0.562877	0.731499	0.583276	0.666165	0.596306	0.401836	0.648025	0.63868	0.534376	0.429496	0.537167	0.619247	0.679214	0.592466	0.609471	0.604662	0.500729	0.557246	0.418793	0.624168	0.467588	0.511021	0.565876	0.560478	0.57608	0.583508	0.546451	0.620202	0.534799	0.567022	0.693377
Cell_0047	TFEB_TR	Glucose 17 mM + Glutamine 2.500000e-01 mM + Insulin 10000 ng/ml	1.97415	2.41287	1.16468	1.82918	1.35219	1.14044	2.34931	0.648847	1.19759	1.14283	1.36025	2.99257	1.09449	0.949293	0.96267	1.88151	2.28961	1.46708	1.00255	0.629492	1.50421	2.83216	0.693337	1.13339	0.920402	1.8806	0.700812	1.79309	1.26395	1.73757	1.88157	0.977582	3.3976	1.05157	1.33959	1.19761	2.02911	1.1897	1.46167	1.75293	0.726664	0.880595	0.944037	1.93218	1.10667	1.07734	2.39427
Cell_0047	FOXO_TR	Glucose 17 mM + Glutamine 2.500000e-01 mM + Insulin 10000 ng/ml	2.86234	3.18476	1.62993	1.73279	1.14404	2.74683	2.68806	1.43572	1.5837	1.20484	2.50234	3.52444	1.40119	0.967993	1.29488	2.6317	2.65253	1.77422	1.64284	1.13593	1.90446	3.38391	1.85209	2.02326	0.937514	2.71037	2.16993	2.82464	1.17345	1.65595	1.23015	2.85359	3.14878	1.77972	1.44538	2.34071	3.30373	2.27584	1.59879	1.88203	0.911543	2.5874	2.60206	1.43797	1.45974	0.978024	3.15146
Cell_0047	AMPKARt2	Glucose 17 mM + Glutamine 2.500000e-01 mM + Insulin 10000 ng/ml	0.458214	0.466881	0.501905	0.514818	0.593395	0.452162	0.655711	0.608271	0.604629	0.728962	0.463833	0.547538	0.554608	0.590796	0.679585	0.712084	0.550282	0.717587	0.593187	0.667859	0.564081	0.423072	0.594882	0.633036	0.528214	0.421806	0.52617	0.613415	0.675262	0.595829	0.624115	0.598644	0.499114	0.560545	0.40178	0.624681	0.483387	0.519961	0.544355	0.549834	0.578899	0.575323	0.575243	0.629529	0.53079	0.577001	0.698215
Cell_0048	TFEB_TR	Glucose 17 mM + Glutamine 2.500000e-01 mM + Insulin 10000 ng/ml	2.04261	2.33207	1.22146	1.7017	1.42392	1.39293	2.38003	0.659862	1.2462	1.06584	1.24334	2.70695	1.09554	0.868411	0.913923	1.98308	2.39678	1.54863	1.00348	0.635376	1.66986	2.58438	0.77858	1.03207	0.903843	1.79048	0.61699	1.75839	1.25383	1.85177	1.91882	1.05053	3.13162	0.9112	1.17774	1.17009	2.3124	1.28666	1.56436	2.41492	0.70785	0.829893	0.911345	2.09399	1.13496	1.18589	1.93531
Cell_0048	FOXO_TR	Glucose 17 mM + Glutamine 2.500000e-01 mM + Insulin 10000 ng/ml	2.80623	3.07012	1.57183	1.73083	1.17211	2.76712	2.77451	1.42373	1.52859	1.19655	2.48735	3.59271	1.40091	0.940671	1.20681	2.66647	2.65915	1.78952	1.59846	1.14273	2.04246	3.10947	1.74352	2.05446	0.920351	2.64764	2.079	2.97552	1.22465	1.60975	1.15738	2.82595	3.17692	1.72783	1.41576	2.60353	3.31108	2.29004	1.63189	1.97944	0.903119	2.5697	2.51552	1.4513	1.41688	0.98968	3.13808
Cell_0048	AMPKARt2	Glucose 17 mM + Glutamine 2.500000e-01 mM + Insulin 10000 ng/ml	0.494191	0.453736	0.513493	0.514314	0.600356	0.459121	0.64705	0.607451	0.595409	0.729368	0.482912	0.536267	0.534009	0.567956	0.680359	0.708015	0.548429	0.716341	0.606261	0.669754	0.539366	0.41999	0.598723	0.627285	0.547909	0.441985	0.519674	0.607928	0.666329	0.593612	0.618822	0.58115	0.49585	0.569258	0.39735	0.608642	0.458491	0.51855	0.537674	0.549696	0.580465	0.554974	0.59054	0.624881	0.519617	0.592396	0.706309
Cell_0049	TFEB_TR	Glucose 17 mM + Glutamine 2.500000e-01 mM + Insulin 10000 ng/ml	1.90241	2.333	1.20534	1.66422	1.49538	1.48565	2.42415	0.60145	1.25355	1.04419	1.18213	2.57012	1.10827	1.00871	0.714628	1.98216	2.27861	1.59752	0.993528	0.643263	1.62979	2.52061	0.724903	1.01348	1.04922	1.72888	0.63506	0.931643	1.20448	1.67338	1.90578	1.16628	2.74675	1.04692	1.29373	1.36037	2.23313	1.45936	1.69476	2.68007	0.746354	0.870349	0.932375	1.97505	1.23042	1.38951	1.86176
Cell_0049	FOXO_TR	Glucose 17 mM + Glutamine 2.500000e-01 mM + Insulin 10000 ng/ml	2.64554	3.13663	1.45246	1.80081	1.23203	2.70377	2.86831	1.40814	1.52201	1.20796	2.6637	3.46442	1.41021	0.941715	1.13399	2.6947	2.6456	1.79515	1.60661	1.19068	1.99218	3.0563	1.77308	1.99379	0.92	2.55464	2.06091	1.56467	1.28947	1.56378	1.10113	2.76178	3.23163	1.66918	1.36085	2.70905	3.3028	2.262	1.59029	1.99402	0.890037	2.57866	2.63241	1.43927	1.42099	0.958841	3.12142
Cell_0049	AMPKARt2	Glucose 17 mM + Glutamine 2.500000e-01 mM + Insulin 10000 ng/ml	0.512352	0.449026	0.52625	0.522246	0.59757	0.53194	0.645706	0.606634	0.598922	0.724287	0.49849	0.527962	0.52513	0.563127	0.674337	0.694725	0.547559	0.729823	0.607069	0.665156	0.546254	0.419793	0.597736	0.615996	0.561801	0.463122	0.496068	0.690183	0.65293	0.588443	0.612655	0.569703	0.498745	0.570292	0.404212	0.613538	0.474931	0.513034	0.555722	0.550408	0.592278	0.551896	0.571952	0.623949	0.527931	0.592039	0.706414
Cell_0050	TFEB_TR	Glucose 17 mM + Glutamine 2.500000e-01 mM + Insulin 10000 ng/ml	1.82769	2.27408	1.15408	1.61845	1.4757	1.20049	2.35973	0.580347	1.25992	1.11107	1.37609	2.39682	1.12123	1.18262	0.732835	1.92259	2.12297	1.6345	0.99337	0.663441	1.55295	2.5427	0.665303	1.10893	1.03812	1.74373	0.720517	1.0312	1.05789	1.55082	2.04715	1.18122	3.17873	1.14662	1.25834	1.54538	1.88136	1.44146	1.54751	2.2535	0.815683	0.8885	0.985292	1.73554	1.19704	1.20013	1.95311
Cell_0050	FOXO_TR	Glucose 17 mM + Glutamine 2.500000e-01 mM + Insulin 10000 ng/ml	2.65883	3.17977	1.39239	1.72238	1.21036	2.58027	2.83549	1.41164	1.53502	1.24622	2.83695	3.21646	1.40179	0.927086	1.17852	2.57838	2.6891	1.82903	1.5764	1.22939	1.98053	3.06982	1.82582	1.91758	0.939707	2.65982	2.0677	1.61744	1.31453	1.54333	1.48798	2.74104	3.37502	1.69955	1.32806	2.56633	3.38029	2.21151	1.4992	1.90763	0.884403	2.65518	2.8814	1.45655	1.41882	0.907436	3.07334
Cell_0050	AMPKARt2	Glucose 17 mM + Glutamine 2.500000e-01 mM + Insulin 10000 ng/ml	0.517125	0.479604	0.551561	0.562591	0.597501	0.578511	0.647911	0.603033	0.618956	0.726532	0.511353	0.536277	0.543486	0.581916	0.671721	0.680455	0.54678	0.722875	0.607496	0.664519	0.537291	0.426871	0.619926	0.618748	0.5555	0.44937	0.481804	0.707457	0.64968	0.599941	0.619697	0.583973	0.503086	0.570544	0.397487	0.621757	0.510758	0.509793	0.572528	0.546447	0.596035	0.559008	0.567685	0.629957	0.535361	0.5848	0.707262
Cell_0051	TFEB_TR	Glucose 17 mM + Glutamine 2.500000e-01 mM + Insulin 10000 ng/ml	1.83695	1.05493	1.14674	1.57725	1.47739	0.936931	2.30456	0.612414	1.25333	1.17659	1.66645	2.45116	1.10719	1.05839	0.992858	1.97741	2.2457	1.67497	1.01594	0.643757	1.66917	2.36496	0.721816	1.11422	1.11583	1.80219	0.712135	0.839965	1.04978	1.89589	2.39197	1.20075	1.33723	1.1154	1.18981	1.50118	1.8253	1.35099	1.47583	2.21416	0.800434	0.849812	0.959556	1.84138	1.08364	0.813686	1.79732
Cell_0051	FOXO_TR	Glucose 17 mM + Glutamine 2.500000e-01 mM + Insulin 10000 ng/ml	2.72545	1.86542	1.44842	1.57298	1.15359	2.52214	2.83275	1.43759	1.50682	1.28523	2.84941	3.14475	1.39296	0.903926	1.23188	2.51834	2.74464	1.85085	1.49865	1.22498	2.03001	2.82245	1.78145	1.875	0.938839	2.82845	2.05981	1.61675	1.2491	1.56709	2.2615	2.78843	1.05974	1.7087	1.33425	2.70236	3.40784	2.10047	1.49518	1.8447	0.89166	2.62304	2.88759	1.51067	1.35866	0.893736	3.08093
Cell_0051	AMPKARt2	Glucose 17 mM + Glutamine 2.500000e-01 mM + Insulin 10000 ng/ml	0.541616	0.463099	0.554527	0.611029	0.596052	0.546507	0.636531	0.614212	0.625566	0.731769	0.507821	0.54066	0.5634	0.592278	0.687202	0.678765	0.55038	0.712357	0.598364	0.671802	0.518809	0.423144	0.643922	0.635368	0.558859	0.431883	0.506818	0.714559	0.655428	0.615826	0.618092	0.591094	0.622465	0.570704	0.388797	0.608233	0.507073	0.511291	0.57512	0.546776	0.587532	0.558505	0.588967	0.62893	0.525426	0.583286	0.70121
Cell_0052	TFEB_TR	Glucose 17 mM + Glutamine 2.500000e-01 mM + Insulin 10000 ng/ml	1.73262	1.0748	1.13062	1.61727	1.55344	1.05494	2.34578	0.622548	1.20936	1.19328	1.74673	2.78921	1.10543	0.823437	1.11717	2.00412	2.32258	1.75768	1.0667	0.59685	1.80985	2.21951	0.758395	1.01802	1.31802	1.84888	0.625658	0.90206	1.06653	2.01488	2.65694	1.21703	1.35259	1.07918	1.33232	1.48048	2.26604	1.27098	1.64896	2.35991	0.703973	0.845359	0.861137	1.93438	1.1029	1.28519	1.99476
Cell_0052	FOXO_TR	Glucose 17 mM + Glutamine 2.500000e-01 mM + Insulin 10000 ng/ml	2.5915	1.89169	1.50401	1.47908	1.33692	2.5305	2.9073	1.49287	1.48562	1.26222	2.8307	3.19042	1.40382	0.896299	1.19432	2.57397	2.79826	1.82072	1.44513	1.20788	2.09196	2.76167	1.64721	1.82303	0.918515	2.87361	2.02237	1.66074	1.15332	1.57318	2.72871	2.80207	1.09646	1.57022	1.33328	3.15923	3.34418	2.02305	1.51298	1.83532	0.878947	2.53133	2.73212	1.5514	1.29838	0.904551	3.14994
Cell_0052	AMPKARt2	Glucose 17 mM + Glutamine 2.500000e-01 mM + Insulin 10000 ng/ml	0.554221	0.47333	0.520454	0.629033	0.594984	0.526918	0.639583	0.623106	0.618394	0.736405	0.497445	0.537195	0.553206	0.583215	0.700408	0.690409	0.545947	0.724514	0.57603	0.676419	0.526727	0.424588	0.628512	0.634602	0.571444	0.431926	0.535069	0.710001	0.655606	0.611964	0.621768	0.58291	0.620871	0.549707	0.407428	0.604197	0.502286	0.525628	0.583314	0.546887	0.583495	0.558698	0.596384	0.624035	0.529846	0.590266	0.689476
Cell_0053	TFEB_TR	Glucose 17 mM + Glutamine 2.500000e-01 mM + Insulin 10000 ng/ml	1.71545	1.08187	1.12765	1.75146	1.55991	1.23957	1.37822	0.612689	1.26005	1.14854	1.73013	2.49067	1.12058	0.820852	1.10889	1.81443	2.39922	1.82885	1.12505	0.591526	1.93804	2.36892	0.682576	0.986566	1.18226	1.89467	0.605651	1.0705	0.966084	1.77366	2.36407	1.30651	1.20879	1.16305	1.26119	1.66295	2.22733	0.973985	1.72957	1.95975	0.6967	0.917857	0.822276	1.97032	1.15978	1.88783	2.35028
Cell_0053	FOXO_TR	Glucose 17 mM + Glutamine 2.500000e-01 mM + Insulin 10000 ng/ml	2.48714	1.93105	1.45451	1.425	1.76056	2.47169	1.81551	1.54048	1.51482	1.26573	2.88714	3.18048	1.41081	0.873611	1.12975	2.56218	2.87088	1.82848	1.42639	1.17809	2.12625	3.08044	1.53541	1.71988	0.9175	2.7916	1.83848	1.75815	1.10957	1.53954	2.76241	2.73242	1.10578	1.49203	1.3052	3.41044	3.25513	2.16887	1.51734	1.86151	0.889269	2.60816	2.62943	1.56126	1.29547	0.956641	3.18059
Cell_0053	AMPKARt2	Glucose 17 mM + Glutamine 2.500000e-01 mM + Insulin 10000 ng/ml	0.540763	0.490677	0.489194	0.629074	0.585866	0.543697	0.482421	0.597737	0.615929	0.748232	0.496376	0.542285	0.541734	0.576645	0.68359	0.696771	0.545167	0.729514	0.566164	0.679153	0.532115	0.434204	0.609893	0.626534	0.565585	0.422361	0.52544	0.710496	0.654845	0.603803	0.639818	0.58355	0.624503	0.522178	0.422783	0.619566	0.508089	0.540996	0.589085	0.533821	0.5851	0.560129	0.582416	0.62823	0.534219	0.603029	0.686608
Cell_0054	TFEB_TR	Glucose 17 mM + Glutamine 2.500000e-01 mM + Insulin 10000 ng/ml	1.86567	1.09596	1.18608	1.79321	1.48512	1.16032	1.37209	0.608623	1.34924	1.13331	1.70205	2.00494	1.12299	0.932179	0.971525	1.68665	2.46838	1.77723	1.15107	0.617054	2.17579	2.4511	0.652069	0.988009	0.884944	1.9085	0.650697	1.00806	1.15219	1.80254	1.96586	1.46032	1.18707	1.33236	1.07457	1.70383	1.58174	0.962351	1.71032	1.8608	0.777627	0.980784	0.877961	2.22604	1.14918	1.54083	2.11293
Cell_0054	FOXO_TR	Glucose 17 mM + Glutamine 2.500000e-01 mM + Insulin 10000 ng/ml	2.64473	1.95735	1.34704	1.40703	2.11758	2.32011	1.76035	1.5089	1.54391	1.48043	2.9268	3.20267	1.40206	0.878667	1.04669	2.53283	2.92087	1.91513	1.40873	1.19229	2.09124	3.17886	1.58785	1.59967	0.940448	2.74162	1.76293	1.79318	1.09821	1.52611	2.78025	2.65439	1.1199	1.51281	1.29244	3.44611	3.20375	2.2916	1.58135	1.86685	1.0807	2.6887	2.59651	1.54356	1.30706	0.966045	3.17211
Cell_0054	AMPKARt2	Glucose 17 mM + Glutamine 2.500000e-01 mM + Insulin 10000 ng/ml	0.545198	0.504089	0.487123	0.633249	0.562864	0.537673	0.496206	0.567823	0.620832	0.754975	0.499771	0.543856	0.559126	0.577468	0.670849	0.686654	0.556278	0.71536	0.573274	0.67834	0.520541	0.435209	0.619533	0.636711	0.548309	0.40511	0.508277	0.719169	0.651849	0.612139	0.63522	0.580246	0.629465	0.514223	0.416602	0.612532	0.508009	0.556279	0.569373	0.534189	0.588813	0.55531	0.572299	0.636776	0.521381	0.615096	0.683455
Cell_0055	TFEB_TR	Glucose 17 mM + Glutamine 2.500000e-01 mM + Insulin 10000 ng/ml	1.8577	1.12487	1.264	1.64318	1.45419	1.04802	1.39889	0.616492	1.3358	1.18248	1.55647	1.2814	1.1702	0.913212	0.872878	1.84684	2.20686	1.66193	1.19833	0.663986	2.17566	2.22864	0.728869	1.00146	0.903409	1.89309	0.618138	1.09688	1.25667	1.89778	2.28886	1.44676	1.25348	1.30109	1.34673	1.54137	1.94358	1.00637	1.70343	2.55529	0.788528	0.955981	0.487486	2.27108	1.17027	1.30762	1.6798
Cell_0055	FOXO_TR	Glucose 17 mM + Glutamine 2.500000e-01 mM + Insulin 10000 ng/ml	2.80484	1.9537	1.30691	1.4356	2.2596	2.26331	1.8029	1.43304	1.53734	1.95305	2.88103	1.79301	1.42553	0.940659	1.11957	2.58699	2.93158	1.95883	1.4051	1.26925	2.0299	2.89279	1.69282	1.50545	0.940619	2.7699	1.95715	1.73991	1.07064	1.55376	2.84702	2.65523	1.14605	1.44314	1.30345	3.52012	3.22136	2.40796	1.62677	1.79315	1.43496	2.61341	1.42771	1.50016	1.2814	0.897685	3.12238
Cell_0055	AMPKARt2	Glucose 17 mM + Glutamine 2.500000e-01 mM + Insulin 10000 ng/ml	0.564871	0.503769	0.485988	0.635624	0.561629	0.520289	0.492903	0.563722	0.622734	0.734578	0.498446	0.463543	0.557323	0.572506	0.695977	0.679806	0.552577	0.713624	0.575594	0.668512	0.51874	0.431628	0.617953	0.645987	0.544757	0.408202	0.53491	0.721102	0.637698	0.62193	0.614824	0.560049	0.63084	0.503947	0.421791	0.591426	0.517234	0.557645	0.542771	0.578333	0.587318	0.555907	0.568192	0.617329	0.534585	0.625114	0.671252
Cell_0056	TFEB_TR	Glucose 17 mM + Glutamine 2.500000e-01 mM + Insulin 10000 ng/ml	1.704	1.14475	1.31784	1.44144	1.47836	1.08849	1.38725	0.638586	1.37947	1.25737	1.47668	0.990279	1.27291	0.924366	1.63495	1.993	2.16803	1.60323	1.30108	0.710806	1.81664	2.08859	0.747692	1.09523	1.09542	1.88708	0.527276	1.11371	1.02613	1.77122	2.64592	1.33459	1.15894	1.10534	1.68883	1.51745	2.87222	1.00729	1.52646	2.94182	0.774622	0.929472	0.505965	2.06368	1.19736	1.53308	1.73382
Cell_0056	FOXO_TR	Glucose 17 mM + Glutamine 2.500000e-01 mM + Insulin 10000 ng/ml	2.74662	1.95373	1.32913	1.44213	2.21417	2.36378	1.84171	1.38503	1.54136	2.52737	2.82565	1.6797	1.48958	0.958536	1.58816	2.61577	2.96715	1.92999	1.42663	1.21384	2.00776	2.71951	1.64317	1.47455	0.921239	2.67455	1.99701	1.7002	1.04675	1.5536	2.93673	2.66321	1.13203	1.38204	1.30363	3.497	3.21353	2.35317	1.55494	1.73922	1.70187	2.67404	1.55866	1.45238	1.27025	1.13628	3.07308
Cell_0056	AMPKARt2	Glucose 17 mM + Glutamine 2.500000e-01 mM + Insulin 10000 ng/ml	0.56849	0.502026	0.474341	0.640418	0.588129	0.516208	0.498234	0.55905	0.61998	0.696918	0.495581	0.450546	0.51524	0.571442	0.713682	0.682843	0.543246	0.723028	0.574388	0.667825	0.516059	0.425053	0.602409	0.646705	0.553647	0.417022	0.572899	0.718026	0.629002	0.616312	0.614222	0.550335	0.626707	0.485456	0.431468	0.602751	0.515621	0.556416	0.536826	0.618745	0.574766	0.56621	0.571663	0.568803	0.560659	0.6187	0.666654
Cell_0057	TFEB_TR	Glucose 17 mM + Glutamine 2.500000e-01 mM + Insulin 10000 ng/ml	1.70508	1.14815	1.30401	1.32498	1.49982	1.12696	1.32549	0.660912	1.49466	1.40036	1.54265	0.917871	1.37359	1.01478	2.74238	1.91738	0.780911	1.66121	1.32373	0.678856	1.7699	2.19288	0.686814	1.18563	1.03789	1.77154	0.538717	0.856257	1.33231	1.73648	2.52355	1.31186	1.12555	1.14891	1.45759	1.55916	2.36657	0.933712	1.39468	2.37938	0.81345	0.994132	0.494174	2.06241	1.15863	1.35886	2.145
Cell_0057	FOXO_TR	Glucose 17 mM + Glutamine 2.500000e-01 mM + Insulin 10000 ng/ml	2.65058	1.97794	1.25002	1.42981	2.06244	2.47535	1.82571	1.32213	1.57618	2.86473	2.85628	1.61197	1.51536	0.916354	2.10895	2.53226	1.41728	1.96739	1.42135	1.18348	2.02466	2.81421	1.56965	1.51025	0.928852	2.45723	1.86973	1.7623	1.05133	1.48386	3.11503	2.57025	1.08889	1.41832	1.3168	3.35378	3.17243	2.19885	1.44875	1.76234	1.75932	2.89142	1.57819	1.40049	1.3009	1.81012	3.14572
Cell_0057	AMPKARt2	Glucose 17 mM + Glutamine 2.500000e-01 mM + Insulin 10000 ng/ml	0.575559	0.505294	0.479136	0.649191	0.602018	0.512213	0.512044	0.548967	0.631383	0.668966	0.499248	0.453343	0.491356	0.583595	0.710077	0.671623	0.498506	0.708359	0.583694	0.684622	0.505571	0.417831	0.611338	0.655162	0.552858	0.407179	0.560102	0.716531	0.632457	0.610094	0.613346	0.560966	0.622984	0.491741	0.426821	0.625884	0.507571	0.557372	0.544186	0.602964	0.568787	0.565825	0.575892	0.542112	0.551296	0.592932	0.669156
Cell_0058	TFEB_TR	Glucose 17 mM + Glutamine 2.500000e-01 mM + Insulin 10000 ng/ml	1.81596	1.15647	1.26051	1.47517	1.46565	1.08768	1.32743	0.705398	1.44107	1.48348	1.56058	0.774993	1.56205	0.85826	2.34732	1.85363	0.772636	1.8458	1.24737	0.664638	2.18185	2.31134	0.684264	1.17674	0.864508	1.61754	0.611045	1.0307	1.73554	1.7341	2.87632	1.4272	1.27373	1.35907	1.13422	1.47467	1.45302	0.910158	1.62327	1.57913	0.821032	1.08135	0.490411	2.10241	1.10324	1.16192	2.41839
Cell_0058	FOXO_TR	Glucose 17 mM + Glutamine 2.500000e-01 mM + Insulin 10000 ng/ml	2.68254	2.0041	1.09592	1.47898	1.98926	2.52061	1.82429	1.23426	1.57811	2.82198	2.95062	1.58461	1.47097	0.913586	2.21639	2.41579	1.38401	2.12295	1.3752	1.61897	2.03847	2.98563	1.64557	1.52053	0.927688	2.35469	1.99094	1.83062	1.04469	1.44968	3.19414	2.52622	1.0926	1.37714	1.33771	3.28749	3.25754	2.1884	1.41489	1.70918	1.70985	2.93177	1.58688	1.3372	1.29862	2.28267	3.1983
Cell_0058	AMPKARt2	Glucose 17 mM + Glutamine 2.500000e-01 mM + Insulin 10000 ng/ml	0.603145	0.50841	0.488757	0.636444	0.605802	0.509868	0.521153	0.55231	0.656476	0.657	0.499986	0.469009	0.496523	0.595148	0.724775	0.656599	0.519797	0.663456	0.589753	0.688257	0.506929	0.420526	0.625762	0.65456	0.543001	0.399253	0.53535	0.715935	0.634313	0.616517	0.596375	0.567407	0.629649	0.506342	0.429247	0.619534	0.535879	0.554969	0.539403	0.577046	0.568107	0.542234	0.572621	0.526932	0.539851	0.592911	0.659894
Cell_0059	TFEB_TR	Glucose 17 mM + Glutamine 2.500000e-01 mM + Insulin 10000 ng/ml	1.81738	1.1781	1.30437	1.7554	1.43049	1.00018	1.35165	0.773218	1.35316	1.45049	1.56681	0.598644	1.8479	0.733155	1.14817	1.89988	0.755392	1.98546	1.25445	0.820001	2.39639	0.748152	0.722988	1.06844	1.02574	1.71943	0.615383	1.38827	1.42441	1.60394	3.43031	1.68984	1.25863	1.34525	1.32241	1.33146	1.98824	0.934329	1.78203	1.56457	0.80042	1.1382	0.500408	2.26955	1.09667	1.14164	2.36695
Cell_0059	FOXO_TR	Glucose 17 mM + Glutamine 2.500000e-01 mM + Insulin 10000 ng/ml	2.72734	2.0277	1.10801	1.48693	2.05102	2.50834	1.79596	1.19526	1.54518	2.81175	2.96452	1.54055	1.41483	0.946077	2.09667	2.42545	1.35292	2.25961	1.35659	2.15547	2.0233	1.54894	1.73397	1.50076	0.961101	2.37054	2.15392	1.77792	1.01154	1.47917	3.14012	2.6358	1.13606	1.26804	1.30495	3.2235	3.35495	2.16697	1.43591	1.58055	1.67805	2.89751	1.58134	1.30411	1.27306	2.23812	3.00239
Cell_0059	AMPKARt2	Glucose 17 mM + Glutamine 2.500000e-01 mM + Insulin 10000 ng/ml	0.626429	0.51712	0.471017	0.612623	0.620767	0.50855	0.529614	0.549055	0.662345	0.655757	0.493938	0.475241	0.494193	0.597057	0.731025	0.662908	0.528612	0.618226	0.582599	0.665618	0.50423	0.544719	0.619078	0.641159	0.548943	0.409053	0.556208	0.722008	0.640871	0.622646	0.590666	0.572834	0.6369	0.493244	0.439799	0.603842	0.551604	0.555401	0.521343	0.588244	0.550263	0.520051	0.575953	0.476493	0.550607	0.62293	0.645266
Cell_0060	TFEB_TR	Glucose 17 mM + Glutamine 2.500000e-01 mM + Insulin 10000 ng/ml	1.6936	1.19863	1.37755	1.6	1.56396	0.914672	1.28025	0.820149	1.44891	1.6259	1.56273	0.881	2.05762	1.02909	1.19496	1.86411	0.74406	1.95941	1.32635	1.02687	2.37467	0.612643	0.715581	0.948358	1.15024	1.89782	0.610885	1.15643	1.44401	1.56743	3.09084	1.77798	1.07928	1.24661	1.54301	1.25345	3.00152	0.902578	1.63522	2.24685	0.79318	1.20504	0.490446	2.83403	1.17937	0.997291	2.22843
Cell_0060	FOXO_TR	Glucose 17 mM + Glutamine 2.500000e-01 mM + Insulin 10000 ng/ml	2.69425	2.05714	1.2313	1.3912	2.08545	2.47823	1.761	1.18839	1.52858	3.13411	2.84669	1.50235	1.38793	0.945296	2.02567	2.52193	1.30833	2.23863	1.37909	2.19316	2.02385	1.64426	1.74156	1.55724	1.20584	2.42833	2.07115	1.73887	1.00333	1.41141	3.19213	2.64988	1.15365	1.25296	1.30223	3.0484	3.25134	1.95391	1.42724	1.54267	1.73103	3.01844	1.51558	1.3237	1.28535	2.11595	2.73734
Cell_0060	AMPKARt2	Glucose 17 mM + Glutamine 2.500000e-01 mM + Insulin 10000 ng/ml	0.630738	0.519573	0.451546	0.614541	0.625784	0.510481	0.524737	0.531404	0.646021	0.667048	0.503932	0.468833	0.486956	0.590389	0.710504	0.664098	0.532961	0.592725	0.583829	0.643087	0.494209	0.54896	0.61345	0.650074	0.560113	0.409889	0.582503	0.727254	0.646691	0.632535	0.596294	0.589465	0.631874	0.478447	0.440787	0.60468	0.520921	0.56151	0.521408	0.601403	0.532695	0.528147	0.58891	0.438404	0.554748	0.626741	0.64153
Cell_0061	TFEB_TR	Glucose 17 mM + Glutamine 2.500000e-01 mM + Insulin 10000 ng/ml	1.59767	1.21332	1.37418	1.16777	1.75184	0.962817	1.26584	0.88296	1.47617	1.89822	1.47178	1.20626	2.26349	1.13618	1.59223	1.83873	0.738005	1.93013	1.31794	1.18619	2.54329	0.669164	0.693894	0.941439	0.896694	1.81636	0.476307	0.878881	1.81982	1.64038	2.80192	1.59871	1.10642	1.3101	1.28685	1.37804	3.03376	0.880211	1.67174	2.35496	0.770736	1.26366	0.476959	3.07561	1.25427	1.16576	2.18138
Cell_0061	FOXO_TR	Glucose 17 mM + Glutamine 2.500000e-01 mM + Insulin 10000 ng/ml	2.68586	2.07818	1.22691	1.35326	2.06762	2.44753	1.87739	1.15887	1.4683	3.38248	2.84478	1.54327	1.37113	0.92267	1.95654	2.46605	1.26225	2.11859	1.37398	2.05509	2.08134	1.68274	1.76655	1.60092	1.5421	2.50946	1.07335	1.83972	1.02144	1.42056	3.25967	2.50467	1.13994	1.28732	1.37106	2.89173	3.15082	1.87217	1.38095	1.54166	1.85374	3.10065	1.50332	1.34767	1.29116	2.14273	2.70608
Cell_0061	AMPKARt2	Glucose 17 mM + Glutamine 2.500000e-01 mM + Insulin 10000 ng/ml	0.631069	0.502733	0.463912	0.624626	0.612275	0.519892	0.517326	0.527292	0.640914	0.681563	0.519608	0.470008	0.479779	0.587033	0.710269	0.651513	0.543835	0.577307	0.598627	0.635602	0.504447	0.559714	0.604903	0.67331	0.548344	0.397602	0.576709	0.714935	0.634781	0.655465	0.59306	0.588015	0.627733	0.480151	0.437523	0.605203	0.521743	0.565515	0.543158	0.59803	0.537267	0.541552	0.585794	0.439624	0.554341	0.612258	0.643647
Cell_0062	TFEB_TR	Glucose 17 mM + Glutamine 2.500000e-01 mM + Insulin 10000 ng/ml	1.63761	1.23393	1.39146	1.26916	1.6467	1.12384	1.38067	0.970565	1.33331	1.81672	1.49459	0.90941	2.51634	0.97296	1.12464	2.00549	0.741541	1.92521	1.28914	1.36558	2.65648	0.770245	0.698732	0.989203	1.07298	1.69906	0.492922	0.947129	1.38761	1.75204	3.50628	1.56677	1.26182	1.33335	1.07399	1.37756	2.35831	0.927301	1.88538	1.78676	0.772169	1.27051	0.4831	2.67373	1.20589	1.44631	2.17043
Cell_0062	FOXO_TR	Glucose 17 mM + Glutamine 2.500000e-01 mM + Insulin 10000 ng/ml	2.72303	2.08404	1.17735	1.30956	2.0776	2.36128	2.02566	1.1323	1.38672	3.23746	3.03008	1.59641	1.33613	0.921053	1.95391	2.33242	1.30694	2.04047	1.33023	2.09316	2.12281	1.70962	1.8112	1.50398	1.67137	2.4709	1.09244	1.89982	1.01913	1.9178	3.16673	2.50455	1.12756	1.2517	1.34615	2.85457	3.21084	1.99383	1.36993	1.50838	1.94367	3.02686	1.55125	1.31894	1.27693	2.20072	2.85658
Cell_0062	AMPKARt2	Glucose 17 mM + Glutamine 2.500000e-01 mM + Insulin 10000 ng/ml	0.637793	0.503483	0.481846	0.628658	0.60601	0.50467	0.530407	0.536614	0.656194	0.680301	0.511318	0.485817	0.46813	0.592006	0.71828	0.659781	0.559802	0.563904	0.605692	0.638285	0.517371	0.553655	0.569681	0.677013	0.531614	0.40259	0.588133	0.696579	0.633197	0.653248	0.589029	0.575507	0.627541	0.476994	0.439299	0.596285	0.562436	0.562184	0.550414	0.601249	0.545437	0.532768	0.582698	0.422885	0.552255	0.617155	0.639261
Cell_0063	TFEB_TR	Glucose 17 mM + Glutamine 2.500000e-01 mM + Insulin 10000 ng/ml	1.07659	1.26656	1.46575	1.73554	1.40258	1.23299	1.38807	1.01157	1.30385	1.63856	1.55248	0.777668	2.5204	1.15077	0.963245	2.04674	0.745179	1.78436	1.28391	1.52471	2.25245	0.757819	0.722487	1.03461	1.63283	1.75018	0.498223	0.895043	0.838015	2.01196	3.85126	1.04213	1.21618	1.29845	1.30685	1.05186	2.18204	0.934218	1.85262	1.7293	0.801364	1.25008	0.493467	2.31062	1.17961	1.34357	2.118
Cell_0063	FOXO_TR	Glucose 17 mM + Glutamine 2.500000e-01 mM + Insulin 10000 ng/ml	1.47813	2.08272	1.21163	1.26524	2.03324	2.31321	2.00473	1.15026	1.41343	2.98193	2.96549	1.57097	1.28714	0.918766	2.05959	2.38062	1.41655	1.99008	1.32237	2.10783	2.06079	1.74789	1.80597	1.39864	1.68786	2.34215	1.09766	1.79446	0.999854	2.5821	3.086	2.37316	1.13552	1.17781	1.35099	2.87945	3.20882	1.92359	1.38761	1.51545	1.94844	2.94281	1.58309	1.24374	1.29861	2.2561	2.9079
Cell_0063	AMPKARt2	Glucose 17 mM + Glutamine 2.500000e-01 mM + Insulin 10000 ng/ml	0.64387	0.527568	0.477359	0.649521	0.608692	0.478659	0.531963	0.541303	0.66726	0.671187	0.505754	0.500037	0.465677	0.587834	0.70355	0.673251	0.56899	0.561809	0.598549	0.644676	0.518724	0.549585	0.547851	0.673582	0.53007	0.411407	0.597001	0.690563	0.653682	0.621452	0.589743	0.647552	0.617569	0.480207	0.451398	0.60045	0.574154	0.557936	0.545235	0.603693	0.543045	0.5324	0.612436	0.404069	0.545028	0.614954	0.628738
Cell_0064	TFEB_TR	Glucose 17 mM + Glutamine 2.500000e-01 mM + Insulin 10000 ng/ml	1.41247	1.3018	1.46208	1.70425	1.45785	1.22645	1.30638	1.03791	1.35093	1.6734	1.3959	1.44713	2.3278	1.10187	1.32969	1.88752	0.699892	1.6259	1.23534	1.7069	1.73257	0.721378	0.790243	1.15956	1.49441	1.75297	0.491197	0.889489	1.03764	2.21816	3.05462	0.882825	1.08765	1.35543	1.35096	1.20197	2.68026	0.890455	1.76896	1.96483	0.821414	1.22939	0.50497	2.17816	1.2722	1.3039	1.97568
Cell_0064	FOXO_TR	Glucose 17 mM + Glutamine 2.500000e-01 mM + Insulin 10000 ng/ml	1.44338	2.07565	1.21537	1.69027	1.93379	2.41874	1.98189	1.20744	1.41987	2.84722	2.68733	1.5506	1.23441	0.892556	2.07415	2.47316	1.38388	1.90093	1.3583	2.15812	1.96924	1.73056	1.75407	1.37257	1.75686	2.30664	1.09564	1.65266	0.984013	2.74213	3.07867	2.24464	1.15786	1.18364	1.72971	2.82967	3.0994	1.75902	1.37241	1.49282	1.93289	2.85694	1.65035	1.22092	1.36377	2.26232	2.80647
Cell_0064	AMPKARt2	Glucose 17 mM + Glutamine 2.500000e-01 mM + Insulin 10000 ng/ml	0.638877	0.516606	0.466813	0.649877	0.608566	0.497564	0.518868	0.538204	0.660457	0.674644	0.524401	0.490499	0.46712	0.588978	0.695738	0.66468	0.566983	0.570939	0.591491	0.64129	0.524759	0.567568	0.579989	0.675919	0.526287	0.398739	0.602493	0.694529	0.65374	0.625132	0.584345	0.650572	0.607002	0.495147	0.467081	0.616985	0.559595	0.576362	0.556287	0.608041	0.533796	0.546075	0.643682	0.412023	0.552001	0.600927	0.622677
Cell_0065	TFEB_TR	Glucose 17 mM + Glutamine 2.500000e-01 mM + Insulin 10000 ng/ml	1.32068	1.31136	1.38757	1.38362	1.61719	0.914973	1.37061	1.07994	1.34294	1.685	1.38346	1.77866	2.31417	0.685537	1.21507	1.98829	0.647706	1.68629	1.20006	2.05289	1.85204	0.705122	0.908943	1.27069	1.06066	1.67546	0.477447	1.16288	1.33527	2.13759	2.48296	0.852152	1.11158	1.36548	1.05642	1.76899	0.748493	0.908981	1.84651	1.88375	0.864012	1.2147	0.516534	2.23254	1.32509	1.51786	1.9302
Cell_0065	FOXO_TR	Glucose 17 mM + Glutamine 2.500000e-01 mM + Insulin 10000 ng/ml	1.53971	2.05649	1.15645	2.46563	1.91351	1.77912	2.0917	1.25423	1.42354	2.86141	2.79749	1.60403	1.19116	0.898388	2.00988	2.39694	1.23037	1.80309	1.35086	2.44371	1.99372	1.67268	1.68336	1.35248	1.73568	2.30181	1.08952	1.5495	0.973365	2.60352	3.01315	2.18611	1.16751	1.2625	2.31572	2.71808	1.21927	1.82944	1.34923	1.51792	1.93601	2.72544	1.71216	1.29524	1.41692	2.25559	2.79271
Cell_0065	AMPKARt2	Glucose 17 mM + Glutamine 2.500000e-01 mM + Insulin 10000 ng/ml	0.637766	0.479171	0.469176	0.587078	0.612317	0.637888	0.521868	0.528361	0.657446	0.683873	0.544183	0.476998	0.458865	0.604579	0.69141	0.663472	0.560849	0.573829	0.603724	0.626464	0.515534	0.567746	0.616072	0.670366	0.511083	0.39383	0.601102	0.703305	0.636558	0.655205	0.576789	0.6496	0.60363	0.49623	0.462836	0.616499	0.665487	0.612376	0.568099	0.628424	0.520313	0.544228	0.647458	0.417668	0.555258	0.607239	0.621312
Cell_0066	TFEB_TR	Glucose 17 mM + Glutamine 2.500000e-01 mM + Insulin 10000 ng/ml	1.06215	1.29253	1.37254	1.52808	1.53104	0.927033	1.50317	1.10313	1.4777	1.72299	1.6591	1.05012	2.40675	0.980721	1.10096	2.10208	0.677917	1.83861	1.24381	2.39529	2.31911	0.648903	1.00291	1.25801	1.06019	1.68461	0.471451	1.22187	1.29789	2.23708	2.66338	0.974484	1.13071	1.42838	1.20772	1.69938	0.909972	0.969061	1.8395	2.28922	0.86382	1.23084	0.512477	2.52583	1.31602	1.67458	2.15688
Cell_0066	FOXO_TR	Glucose 17 mM + Glutamine 2.500000e-01 mM + Insulin 10000 ng/ml	1.583	2.01611	1.14178	2.81354	1.90088	1.78859	2.1812	1.26246	1.88648	3.00892	3.09741	1.66095	1.20179	0.910183	2.07578	2.2757	1.19529	1.72259	1.32841	2.78469	2.09918	1.66383	1.6529	1.34436	1.63849	2.26953	1.0945	1.45296	0.969178	2.67572	2.95038	2.21485	1.1591	1.28956	2.66706	2.79573	1.26786	1.89138	1.34326	1.9416	1.92815	2.63488	1.7028	1.3267	1.34994	2.31483	2.86535
Cell_0066	AMPKARt2	Glucose 17 mM + Glutamine 2.500000e-01 mM + Insulin 10000 ng/ml	0.626009	0.471393	0.483364	0.51706	0.615351	0.604177	0.499865	0.526337	0.674994	0.682425	0.563058	0.507517	0.456943	0.591971	0.667603	0.674361	0.548785	0.569795	0.626093	0.618226	0.498726	0.545581	0.599825	0.664401	0.498333	0.404394	0.589972	0.707079	0.642217	0.644074	0.576556	0.654204	0.59824	0.499573	0.447095	0.609396	0.669429	0.612348	0.563691	0.607062	0.512811	0.548462	0.647703	0.470332	0.548598	0.60671	0.613501
Cell_0067	TFEB_TR	Glucose 17 mM + Glutamine 2.500000e-01 mM + Insulin 10000 ng/ml	1.02283	1.3293	1.38841	1.76354	1.41499	0.904095	1.54212	1.14726	1.64893	1.91364	0.75806	0.632757	2.39084	1.4824	1.49024	1.78764	0.73075	1.77841	1.30561	2.51911	2.30943	0.63044	1.02458	1.18568	0.990816	1.6731	0.477865	1.05802	1.1929	2.85591	2.49693	1.00629	1.02047	1.57821	1.57003	1.48833	0.889562	1.03269	1.78688	2.99031	0.79236	0.810657	0.510457	2.5996	1.35308	1.61581	2.31598
Cell_0067	FOXO_TR	Glucose 17 mM + Glutamine 2.500000e-01 mM + Insulin 10000 ng/ml	1.48039	1.9838	1.15593	2.71812	1.82866	1.73688	2.1511	1.27746	2.69139	2.98794	0.936618	1.71081	1.23465	0.869534	2.20861	2.25555	1.24859	1.6693	1.34834	2.93399	2.13651	1.68322	1.68769	1.34322	1.66529	2.22616	1.11564	1.38481	0.974444	2.79992	2.91325	2.30506	1.15353	1.27574	2.74963	3.00246	1.27972	1.75389	1.30927	2.59814	1.92297	1.42234	1.77687	1.23793	1.30918	2.29195	2.81905
Cell_0067	AMPKARt2	Glucose 17 mM + Glutamine 2.500000e-01 mM + Insulin 10000 ng/ml	0.627088	0.473904	0.496063	0.490376	0.607477	0.615763	0.448806	0.541998	0.695168	0.668895	0.389876	0.546096	0.464385	0.582297	0.651876	0.668095	0.541351	0.590485	0.62131	0.616934	0.520246	0.544257	0.562487	0.672597	0.500026	0.401962	0.582281	0.698473	0.656356	0.616265	0.583672	0.649701	0.595111	0.519456	0.449216	0.622607	0.673409	0.572581	0.558275	0.517584	0.520344	0.604255	0.641148	0.581347	0.577205	0.57363	0.607005
Cell_0068	TFEB_TR	Glucose 17 mM + Glutamine 2.500000e-01 mM + Insulin 10000 ng/ml	1.17116	1.47169	1.33666	1.58929	1.38454	0.884717	1.53881	1.19139	1.54966	2.0105	0.762966	1.28172	2.3181	1.20982	1.55371	1.68261	0.734983	1.57713	1.34203	2.49982	1.97442	0.676261	1.02985	1.05712	0.868222	1.52694	0.473973	1.14573	1.20659	3.22684	1.98072	0.924476	0.98671	1.37531	1.40538	1.89302	0.885083	1.17457	1.82961	2.7216	0.802657	0.833972	0.526772	2.25814	1.43352	1.35392	2.19361
Cell_0068	FOXO_TR	Glucose 17 mM + Glutamine 2.500000e-01 mM + Insulin 10000 ng/ml	1.4021	2.00923	1.12119	2.6252	1.86492	1.75792	2.01421	1.33982	3.09045	2.77992	0.930202	1.79337	1.1826	1.01473	2.22678	2.31591	1.25596	1.6608	1.28661	2.89784	2.10912	1.70291	1.69433	1.33097	1.76105	2.07573	1.10677	1.3525	0.997011	2.83732	2.79834	2.32173	1.15695	1.3029	2.77666	2.97383	1.29233	1.64655	1.26967	2.89102	1.91888	1.43461	1.92397	1.16481	1.73793	2.19421	2.79785
Cell_0068	AMPKARt2	Glucose 17 mM + Glutamine 2.500000e-01 mM + Insulin 10000 ng/ml	0.65689	0.459871	0.49124	0.489283	0.600146	0.621299	0.444707	0.555352	0.703954	0.651337	0.39934	0.522147	0.459055	0.614616	0.651287	0.659129	0.561407	0.646667	0.60159	0.611224	0.545958	0.555143	0.558329	0.683856	0.506882	0.399084	0.588671	0.694838	0.655987	0.617919	0.591798	0.632424	0.597595	0.530281	0.450923	0.633064	0.668609	0.550873	0.552028	0.453246	0.53115	0.571549	0.61206	0.621122	0.595716	0.550882	0.616573
Cell_0069	TFEB_TR	Glucose 17 mM + Glutamine 2.500000e-01 mM + Insulin 10000 ng/ml	1.30276	1.60857	1.28673	1.56581	1.34898	0.884067	1.56671	1.1808	1.43146	2.00773	0.772786	1.43314	2.23604	0.995664	1.16159	1.84495	0.73376	1.53237	1.37845	2.45586	1.85386	0.651495	1.08274	0.961922	1.05158	1.46016	0.458427	1.26813	1.19618	2.77468	1.92638	1.00252	1.09172	1.15794	1.18907	2.23412	0.994184	1.31109	1.80603	2.11617	0.842835	0.795678	0.529989	1.94755	1.54326	1.21259	1.40906
Cell_0069	FOXO_TR	Glucose 17 mM + Glutamine 2.500000e-01 mM + Insulin 10000 ng/ml	1.42808	2.04837	1.09406	2.5605	1.98992	1.87493	1.86266	1.39985	3.0057	2.84942	0.935932	1.8632	1.09624	1.48699	2.16763	2.21535	1.28834	1.66141	1.28654	2.85066	2.11427	1.78001	1.62858	1.33291	1.78082	1.94275	1.071	1.30031	1.00682	2.99667	2.70597	2.22369	1.15347	1.3349	2.82571	2.81561	1.28934	1.56872	1.28441	2.82503	1.85557	1.46745	1.88767	1.176	2.48752	2.2334	1.60782
Cell_0069	AMPKARt2	Glucose 17 mM + Glutamine 2.500000e-01 mM + Insulin 10000 ng/ml	0.672471	0.453035	0.479213	0.504843	0.598986	0.626902	0.464563	0.561724	0.702148	0.642166	0.412739	0.480975	0.447313	0.599259	0.641699	0.671894	0.577774	0.689652	0.61073	0.610645	0.53327	0.554972	0.575709	0.68221	0.494726	0.405534	0.596208	0.701343	0.659359	0.617875	0.586913	0.638396	0.598783	0.537517	0.434687	0.624594	0.657161	0.548958	0.545396	0.455356	0.525692	0.58457	0.594695	0.579769	0.521754	0.560622	0.48043
Cell_0070	TFEB_TR	Glucose 17 mM + Glutamine 2.500000e-01 mM + Insulin 10000 ng/ml	1.29943	1.6642	1.32997	1.8	1.47848	0.876976	1.63866	1.20317	1.54723	1.9572	0.779383	0.906884	2.20922	1.20684	1.11869	1.46452	0.739478	1.58702	1.43407	2.39642	1.91695	0.619882	1.13846	1.03936	1.15599	1.56323	0.465662	1.11369	1.01292	2.29639	2.01328	1.08482	1.14423	1.53786	1.23103	2.2603	1.01001	1.32743	1.84373	2.24238	0.771099	0.782532	0.510091	1.92843	1.60979	1.42893	1.46783
Cell_0070	FOXO_TR	Glucose 17 mM + Glutamine 2.500000e-01 mM + Insulin 10000 ng/ml	1.4899	2.02109	1.12978	2.60793	1.9721	1.9118	1.8258	1.38587	2.86596	3.01571	0.945693	1.85323	1.10898	1.87002	2.16453	1.91882	1.32963	1.65811	1.76715	2.82128	2.1303	1.87869	1.53749	1.27808	1.76707	1.99569	1.07532	1.23464	0.983203	3.1285	2.74189	2.24527	1.13795	1.35435	2.87943	2.81968	1.24443	1.4059	1.30231	2.84619	1.7861	1.50593	1.70366	1.20876	2.81959	2.29407	1.63911
Cell_0070	AMPKARt2	Glucose 17 mM + Glutamine 2.500000e-01 mM + Insulin 10000 ng/ml	0.660278	0.452247	0.484334	0.530276	0.598178	0.657441	0.446737	0.573657	0.689669	0.646738	0.420323	0.483488	0.452129	0.549708	0.625651	0.675821	0.544377	0.686636	0.624079	0.617077	0.527085	0.5608	0.573212	0.669936	0.472294	0.405651	0.598699	0.698917	0.671039	0.598041	0.577488	0.65699	0.597994	0.551257	0.43667	0.62512	0.659065	0.534685	0.553676	0.464549	0.509637	0.611373	0.602218	0.573714	0.4231	0.575761	0.491159
Cell_0071	TFEB_TR	Glucose 17 mM + Glutamine 2.500000e-01 mM + Insulin 10000 ng/ml	1.13591	1.72274	1.3823	1.71381	1.60473	0.859738	1.71844	1.26528	1.63164	1.73997	0.787234	1.19206	2.25897	1.21637	1.36052	1.43222	0.767236	1.54797	1.49887	2.31825	1.17457	0.710241	1.09606	1.07652	1.10619	1.58984	0.490982	1.02517	0.917078	2.37059	1.93444	0.943361	1.1218	1.78378	1.20961	2.14076	0.988127	1.43895	2.07427	2.34375	0.743444	0.813942	0.497	2.10168	1.57173	1.82976	1.43713
Cell_0071	FOXO_TR	Glucose 17 mM + Glutamine 2.500000e-01 mM + Insulin 10000 ng/ml	1.52665	1.97282	1.13808	2.76654	1.85846	1.80359	1.82343	1.35084	2.79306	2.86011	0.964155	1.72895	1.16709	1.91816	2.21731	1.85576	1.29642	1.68934	2.47355	2.67179	2.17353	1.89653	1.45716	1.29019	1.80048	2.06184	1.09631	1.2217	0.980166	3.03825	2.79386	2.44194	1.13871	1.36311	2.94055	2.87802	1.2678	1.31953	1.27834	2.98822	1.81434	1.56122	1.57209	1.24317	2.72254	2.25977	1.67479
Cell_0071	AMPKARt2	Glucose 17 mM + Glutamine 2.500000e-01 mM + Insulin 10000 ng/ml	0.657677	0.443436	0.496474	0.538448	0.605964	0.653838	0.43676	0.573741	0.680805	0.650279	0.426061	0.489064	0.462918	0.591132	0.613067	0.6805	0.498685	0.67822	0.606486	0.609894	0.626438	0.569759	0.559942	0.667093	0.47414	0.410983	0.6021	0.693465	0.673254	0.588373	0.586939	0.646894	0.592736	0.558169	0.457054	0.637155	0.679658	0.523812	0.566461	0.464487	0.512763	0.609578	0.60632	0.600671	0.395134	0.578598	0.487869
Cell_0072	TFEB_TR	Glucose 17 mM + Glutamine 2.500000e-01 mM + Insulin 10000 ng/ml	1.03896	1.80546	1.36937	1.54747	1.39755	0.84604	1.71323	1.26644	1.61135	1.65068	0.801374	1.21029	2.21137	1.16921	1.3255	1.45607	0.858611	1.47911	1.58902	2.38267	1.27159	0.770142	1.02337	0.932441	1.04129	1.51395	0.497292	1.09499	1.08965	2.3727	1.97756	0.909016	1.13174	1.46109	1.38165	1.62706	1.07263	1.69739	2.06927	2.18334	0.799527	0.818839	0.502215	2.15648	1.58531	1.93893	1.47966
Cell_0072	FOXO_TR	Glucose 17 mM + Glutamine 2.500000e-01 mM + Insulin 10000 ng/ml	1.5129	1.97737	1.12149	2.7065	1.84109	1.69433	1.72583	1.38166	2.85925	2.7828	0.993225	1.56445	1.17206	1.91411	2.21311	1.8899	1.30629	1.73671	2.77411	2.53648	2.25394	1.83458	1.43586	1.64717	1.86385	2.05445	1.08808	1.25571	0.969012	3.0083	2.7802	2.55563	1.14126	1.3341	2.96482	2.88392	1.45631	1.33253	1.25657	3.04333	1.88182	1.60645	1.447	1.23691	2.76782	2.32423	1.71685
Cell_0072	AMPKARt2	Glucose 17 mM + Glutamine 2.500000e-01 mM + Insulin 10000 ng/ml	0.660386	0.438275	0.49491	0.535539	0.623663	0.635986	0.45533	0.5541	0.683616	0.635216	0.435286	0.475146	0.46174	0.64956	0.613278	0.694689	0.499011	0.694906	0.588853	0.59349	0.618088	0.555417	0.564165	0.678607	0.485257	0.418498	0.600783	0.697498	0.670452	0.593362	0.59307	0.641127	0.588908	0.565268	0.449731	0.638295	0.694313	0.524884	0.571244	0.470946	0.535009	0.609946	0.608519	0.605825	0.414238	0.564435	0.484008
Cell_0073	TFEB_TR	Glucose 17 mM + Glutamine 2.500000e-01 mM + Insulin 10000 ng/ml	1.34304	1.84971	1.33584	1.63503	1.26972	0.863861	1.64636	1.24427	1.69792	1.85276	0.807829	0.575864	2.09993	1.11657	1.25994	1.48957	0.969293	1.40585	1.69736	2.63115	1.34692	0.743095	1.05331	0.910325	0.871782	0.633108	0.494907	1.00094	1.2002	2.13909	2.07685	1.05166	1.1285	1.36401	1.55904	1.20947	1.04801	1.7239	1.80995	2.74366	0.784521	0.822373	0.518295	1.8921	1.66023	1.40095	1.52139
Cell_0073	FOXO_TR	Glucose 17 mM + Glutamine 2.500000e-01 mM + Insulin 10000 ng/ml	1.50985	1.98613	1.13372	2.55984	1.8388	1.72747	1.62327	1.42534	3.06023	2.94697	1.00442	1.49369	1.17953	1.91438	2.15265	1.87325	1.3979	1.75989	2.7699	2.62656	2.1456	1.73505	1.44066	2.09987	1.90963	1.54598	1.10406	1.28918	0.966612	3.11708	2.73997	2.56477	1.08321	1.30941	2.89926	2.86663	1.68658	1.27032	1.24892	3.03349	1.89479	1.58327	1.28355	1.1745	2.92371	2.45744	1.71169
Cell_0073	AMPKARt2	Glucose 17 mM + Glutamine 2.500000e-01 mM + Insulin 10000 ng/ml	0.641499	0.434192	0.488354	0.543161	0.631393	0.663042	0.456624	0.550845	0.682277	0.61785	0.429048	0.4706	0.461123	0.623701	0.63107	0.696055	0.524308	0.709747	0.586506	0.592277	0.619949	0.522258	0.575243	0.680043	0.471523	0.562172	0.588974	0.70112	0.671956	0.589774	0.578293	0.658633	0.599136	0.566628	0.429331	0.634563	0.683481	0.523374	0.572408	0.475281	0.540844	0.629104	0.611912	0.60106	0.452361	0.543303	0.491604
Cell_0074	TFEB_TR	Glucose 17 mM + Glutamine 2.500000e-01 mM + Insulin 10000 ng/ml	1.70019	1.88999	1.29993	1.58498	1.45904	0.903752	1.67748	1.24785	1.80659	1.89742	0.810649	1.95998	2.10706	0.912225	1.50513	1.65807	1.09448	1.28005	1.73753	2.60571	1.34844	0.799619	1.05847	1.06162	0.903648	0.614616	0.507482	0.878501	1.08727	2.16578	2.36149	0.981073	1.08292	1.41375	1.22001	1.43482	0.910134	1.51022	1.83108	3.59361	0.818794	0.843563	0.530504	1.67937	1.6042	0.974553	1.44931
Cell_0074	FOXO_TR	Glucose 17 mM + Glutamine 2.500000e-01 mM + Insulin 10000 ng/ml	1.5666	1.94643	1.06863	2.58449	1.72933	1.81344	1.58823	1.45953	3.16588	2.9094	1.00055	1.4773	1.21434	1.80538	2.14054	1.88871	1.40964	1.77523	2.78358	2.71689	2.15757	1.61465	1.39844	2.26157	1.93694	1.4867	1.14462	1.32982	1.29067	3.06537	2.7681	2.59165	1.02336	1.26966	2.84304	2.84587	1.74631	1.1742	1.26838	3.0175	1.88511	1.52445	1.18082	1.17227	2.96772	2.49366	1.68035
Cell_0074	AMPKARt2	Glucose 17 mM + Glutamine 2.500000e-01 mM + Insulin 10000 ng/ml	0.62774	0.421036	0.489191	0.545316	0.626834	0.660406	0.45571	0.575391	0.677322	0.629848	0.414464	0.471316	0.466055	0.603284	0.63754	0.676439	0.525229	0.708962	0.576164	0.59996	0.626951	0.498115	0.583766	0.671098	0.461601	0.56202	0.564291	0.705888	0.667026	0.576438	0.584564	0.640089	0.610185	0.558281	0.438441	0.639929	0.661407	0.53108	0.563389	0.483696	0.528227	0.618524	0.600376	0.600587	0.50931	0.54238	0.493613
Cell_0075	TFEB_TR	Glucose 17 mM + Glutamine 2.500000e-01 mM + Insulin 10000 ng/ml	1.46264	1.95319	1.29852	1.45122	1.42486	0.907964	1.76159	1.22932	1.78534	1.76526	0.825979	3.98273	2.06254	1.04685	1.74391	1.68518	1.26861	1.22024	1.75287	2.26978	1.30416	0.885005	0.958508	1.05727	1.14718	0.625472	0.512365	0.983079	1.25984	2.26171	1.56139	0.851684	1.08924	1.18945	1.08421	1.82525	0.913712	1.45307	2.03224	3.68614	0.945668	0.827905	0.526672	1.87919	1.5455	1.32748	1.46828
Cell_0075	FOXO_TR	Glucose 17 mM + Glutamine 2.500000e-01 mM + Insulin 10000 ng/ml	1.59592	1.91686	1.12726	2.49568	1.63644	1.76849	1.5741	1.49162	3.18861	2.75725	1.01632	1.44918	1.18137	1.80476	2.15844	1.94905	1.31851	1.79284	2.72867	2.66814	2.34446	1.5104	1.37656	2.29383	1.96536	1.43986	1.13753	1.36648	1.98049	2.87975	1.4008	2.49142	1.05482	1.29488	2.87005	2.95384	1.62351	1.1402	1.31717	2.98018	1.91718	1.47367	1.14954	1.21246	3.14558	2.53286	1.70993
Cell_0075	AMPKARt2	Glucose 17 mM + Glutamine 2.500000e-01 mM + Insulin 10000 ng/ml	0.632622	0.414256	0.499837	0.53369	0.627924	0.617907	0.472896	0.585813	0.677764	0.655386	0.427036	0.469637	0.459261	0.618893	0.619587	0.676172	0.506696	0.704049	0.563288	0.602897	0.635642	0.499044	0.59505	0.67469	0.481868	0.566858	0.534394	0.706906	0.658461	0.569559	0.481012	0.605306	0.609579	0.575204	0.458785	0.648975	0.653902	0.543496	0.555051	0.502329	0.526432	0.588983	0.587651	0.60853	0.538153	0.56071	0.477389
Cell_0076	TFEB_TR	Glucose 17 mM + Glutamine 2.500000e-01 mM + Insulin 10000 ng/ml	1.06594	1.98194	1.41443	1.60376	1.14661	0.905624	1.68597	1.18713	1.73309	1.84185	0.835259	2.88441	1.84911	1.36382	1.70734	1.5861	1.39004	1.28367	1.86123	2.26724	1.30222	0.873629	0.960959	0.942171	1.21045	0.630199	0.505267	1.12897	1.77782	2.15503	1.23804	0.990225	1.13047	1.40687	1.51339	2.17493	0.949623	1.55394	2.05689	3.3762	0.9263	0.816143	0.520109	2.16574	1.66063	1.49418	1.58027
Cell_0076	FOXO_TR	Glucose 17 mM + Glutamine 2.500000e-01 mM + Insulin 10000 ng/ml	1.59541	1.94651	1.70315	2.28512	1.61005	1.73707	1.5766	1.41833	3.25296	2.77355	1.03059	1.41874	1.1147	1.97794	2.18998	1.95066	1.24761	1.77154	2.70735	2.74495	2.45969	1.45539	1.38348	2.34283	2.00197	1.48007	1.10289	1.33992	2.47597	2.76851	1.39135	2.23365	1.08864	1.69032	2.89404	3.11369	1.48319	1.12821	1.29593	3.00019	1.98036	1.41909	1.13314	1.19782	3.47524	2.56128	1.75616
Cell_0076	AMPKARt2	Glucose 17 mM + Glutamine 2.500000e-01 mM + Insulin 10000 ng/ml	0.616987	0.429619	0.514074	0.533311	0.631634	0.631263	0.475614	0.571244	0.672442	0.664623	0.447707	0.468085	0.448725	0.612097	0.611548	0.693933	0.503527	0.696264	0.564468	0.61135	0.634715	0.511153	0.600606	0.675865	0.498295	0.559965	0.528045	0.687388	0.664132	0.565688	0.524253	0.62213	0.612564	0.600272	0.458397	0.656305	0.660579	0.537727	0.572051	0.510304	0.533533	0.597136	0.589315	0.624845	0.520544	0.578167	0.474254
Cell_0077	TFEB_TR	Glucose 17 mM + Glutamine 2.500000e-01 mM + Insulin 10000 ng/ml	1.21835	1.9772	1.57653	1.65342	1.18339	0.971276	1.57004	1.19431	1.69797	1.90582	0.828148	0.77558	1.7479	1.24032	1.41454	1.59577	1.41341	1.36376	1.9711	2.4464	1.3173	0.878574	1.04736	0.977631	1.3158	0.617198	0.527548	1.15217	1.65325	2.00152	1.34126	1.08374	1.16159	2.01106	1.6285	0.748293	0.904555	1.59829	2.05741	2.83546	0.818779	0.85171	0.522356	2.23829	1.70953	1.22588	1.57078
Cell_0077	FOXO_TR	Glucose 17 mM + Glutamine 2.500000e-01 mM + Insulin 10000 ng/ml	1.66437	1.97576	2.3974	2.31637	1.80126	1.98212	1.57206	1.4705	3.28169	2.82593	1.01647	1.28919	1.12936	2.06538	2.27186	1.93974	1.23592	1.73513	2.90683	2.85051	2.47043	1.43491	1.3506	2.32121	2.04183	1.50876	1.09119	1.26483	2.53775	2.67965	1.37678	2.07358	1.05751	2.25743	2.89502	1.57989	1.39975	1.14585	1.32353	3.07007	1.99856	1.3947	1.13179	1.21372	3.58952	2.41276	1.77053
Cell_0077	AMPKARt2	Glucose 17 mM + Glutamine 2.500000e-01 mM + Insulin 10000 ng/ml	0.596013	0.45347	0.504136	0.543566	0.71512	0.647252	0.470517	0.57988	0.665912	0.675998	0.445003	0.454405	0.450602	0.603951	0.619028	0.691264	0.515192	0.695118	0.572224	0.619657	0.616769	0.515565	0.604726	0.662006	0.493321	0.555734	0.542413	0.68184	0.678283	0.556603	0.523947	0.636484	0.622279	0.587823	0.44777	0.636816	0.661173	0.532048	0.59359	0.504313	0.532893	0.618309	0.594052	0.627878	0.505803	0.595437	0.497584
Cell_0078	TFEB_TR	Glucose 17 mM + Glutamine 2.500000e-01 mM + Insulin 10000 ng/ml	1.47819	1.96523	1.65167	1.50835	1.15177	1.05675	1.6442	1.36908	1.67112	1.70763	0.83721	0.823407	1.83382	0.985564	1.08898	1.55871	1.45083	1.41336	2.02854	2.28341	1.27817	0.934175	1.02008	1.02999	1.50486	0.631105	0.564386	1.06826	1.16496	1.86099	1.52617	1.01951	1.23287	1.99784	1.44587	0.753867	0.911972	1.64004	2.08662	2.11051	0.821077	0.846584	0.530246	2.32468	1.56612	1.44444	1.5128
Cell_0078	FOXO_TR	Glucose 17 mM + Glutamine 2.500000e-01 mM + Insulin 10000 ng/ml	1.70492	1.9625	2.54563	2.49492	1.79548	2.26288	1.51283	2.02466	3.28542	2.93035	1.02055	1.14024	1.12537	2.05222	2.25452	2.00345	1.24186	1.78348	3.07398	2.68522	2.42942	1.41332	1.34533	2.35879	2.04061	1.46855	1.07679	1.20792	2.4986	2.57609	1.33072	2.02061	1.05302	2.43263	2.86915	1.63492	1.35888	1.18078	1.81168	3.04991	1.95659	1.42702	1.16913	1.19856	3.52384	2.21233	1.80938
Cell_0078	AMPKARt2	Glucose 17 mM + Glutamine 2.500000e-01 mM + Insulin 10000 ng/ml	0.617051	0.460218	0.46749	0.541504	0.722719	0.608813	0.47967	0.61412	0.672758	0.695109	0.44917	0.447407	0.454555	0.601307	0.612196	0.681385	0.514613	0.704853	0.572031	0.611895	0.608952	0.52049	0.615251	0.660268	0.486971	0.565651	0.539717	0.714455	0.684417	0.553339	0.517217	0.606376	0.624897	0.568599	0.448405	0.634999	0.652428	0.536861	0.587387	0.506174	0.533164	0.614887	0.59621	0.622371	0.500137	0.596089	0.49258
Cell_0079	TFEB_TR	Glucose 17 mM + Glutamine 2.500000e-01 mM + Insulin 10000 ng/ml	1.42967	1.94242	1.69644	1.84801	1.09134	1.1039	1.70779	1.70934	1.78873	0.943061	0.864733	1.44034	1.91101	0.922203	1.1801	1.56765	1.53318	1.41677	2.0978	2.15871	1.23446	0.940559	0.966569	0.951068	1.34202	0.646412	0.561631	0.962756	1.76473	1.88655	1.47398	1.18467	1.30813	1.81019	1.58087	0.794568	0.911306	1.70848	2.01366	2.66898	1.55792	0.794009	0.54609	2.41164	1.59629	1.58738	1.53154
Cell_0079	FOXO_TR	Glucose 17 mM + Glutamine 2.500000e-01 mM + Insulin 10000 ng/ml	1.61259	1.97129	2.39982	2.57556	1.83252	2.15232	1.44364	2.64157	3.32916	1.47264	1.06488	1.19368	1.11357	2.06941	2.10591	2.0689	1.23838	1.84952	3.0642	2.53633	2.39407	1.38298	1.34266	2.5066	2.00612	1.48658	1.03127	1.17458	2.49617	2.53373	1.31035	1.86942	1.0868	2.35886	2.77805	1.62849	1.36642	1.14181	2.67039	2.98089	1.93786	1.43429	1.243	1.13653	3.56142	2.16109	1.82909
Cell_0079	AMPKARt2	Glucose 17 mM + Glutamine 2.500000e-01 mM + Insulin 10000 ng/ml	0.642564	0.451899	0.457493	0.535617	0.704614	0.603167	0.483673	0.618394	0.673967	0.626874	0.458291	0.468785	0.467017	0.583699	0.602685	0.68092	0.499559	0.705545	0.559897	0.608299	0.620769	0.524526	0.618267	0.663573	0.496195	0.571399	0.526211	0.726886	0.680062	0.556064	0.523228	0.59758	0.621852	0.571797	0.452201	0.6217	0.646534	0.531245	0.56243	0.512839	0.697029	0.607067	0.596854	0.628886	0.479346	0.563413	0.464994
Cell_0080	TFEB_TR	Glucose 17 mM + Glutamine 2.500000e-01 mM + Insulin 10000 ng/ml	1.3988	1.9314	1.78949	2.34547	1.08335	1.17481	1.59031	1.94108	1.99038	0.933715	0.873018	1.28005	2.01736	0.909249	1.48549	1.79812	1.63058	1.36743	2.07202	2.18469	1.2446	0.945416	0.956201	0.960691	1.07851	0.614771	0.554413	1.0252	2.43798	1.95589	1.55607	1.4251	1.39375	2.22325	1.6889	0.840401	0.862082	1.6912	1.94621	4.22203	1.45092	0.780471	0.553787	2.42449	1.97529	1.26938	1.56662
Cell_0080	FOXO_TR	Glucose 17 mM + Glutamine 2.500000e-01 mM + Insulin 10000 ng/ml	1.52715	2.01486	2.45682	2.56817	1.83036	1.79451	1.40605	2.68782	3.35052	1.46351	1.09687	1.28638	1.4488	2.06475	2.10266	2.10957	1.2511	1.81277	3.10361	2.61313	2.40558	1.35094	1.26283	2.55055	2.05084	1.54299	0.988932	1.1159	2.51513	2.53723	1.33951	1.66613	1.09776	2.43095	2.74543	1.60232	1.36058	1.0761	3.16737	2.97051	1.95984	1.35156	1.298	1.52804	3.5999	2.24932	1.79957
Cell_0080	AMPKARt2	Glucose 17 mM + Glutamine 2.500000e-01 mM + Insulin 10000 ng/ml	0.624327	0.451815	0.49053	0.543917	0.700187	0.617823	0.489013	0.597017	0.65373	0.619939	0.422757	0.488273	0.495347	0.58057	0.622895	0.677341	0.488151	0.704986	0.549267	0.619806	0.621699	0.511435	0.612012	0.645415	0.519891	0.571708	0.527946	0.703053	0.671129	0.554538	0.525211	0.601439	0.622164	0.575146	0.439707	0.604075	0.645688	0.523339	0.536024	0.505091	0.705757	0.602714	0.598436	0.619086	0.473249	0.552972	0.498448
Cell_0081	TFEB_TR	Glucose 17 mM + Glutamine 2.500000e-01 mM + Insulin 10000 ng/ml	1.36547	1.90394	1.83675	2.36776	1.10581	1.30783	1.4918	1.92679	1.97831	0.917309	0.868476	1.37864	2.22347	1.00619	1.17445	1.83453	1.72714	1.42989	2.00493	1.95837	1.26935	0.988172	0.912846	1.11486	1.10516	0.601472	0.587259	1.07551	1.62342	1.88317	1.87381	1.41438	1.51692	2.43072	1.44652	0.814743	0.908226	1.67345	1.95385	4.09039	1.37374	0.778483	0.537649	2.97859	2.23363	1.02001	1.60469
Cell_0081	FOXO_TR	Glucose 17 mM + Glutamine 2.500000e-01 mM + Insulin 10000 ng/ml	1.50726	2.00949	2.59018	2.4734	1.78138	1.60956	1.34972	2.45282	3.29273	1.43929	1.0957	1.2289	2.11401	2.04119	1.3266	2.22081	1.30893	1.8736	3.20154	2.60772	2.40602	1.30467	1.22889	2.47686	2.14365	1.55712	0.989459	1.02697	2.62758	2.56108	1.34597	1.54758	1.09533	2.52585	2.79798	1.59488	1.2895	1.09127	3.12404	2.98967	1.91924	1.23609	1.28566	2.38784	3.48942	2.11293	1.88106
Cell_0081	AMPKARt2	Glucose 17 mM + Glutamine 2.500000e-01 mM + Insulin 10000 ng/ml	0.597174	0.464185	0.513372	0.557785	0.709573	0.584597	0.507243	0.590534	0.631893	0.621784	0.368959	0.494391	0.502839	0.588382	0.637797	0.676832	0.486221	0.722788	0.546087	0.61731	0.618243	0.502244	0.600054	0.632988	0.524992	0.570522	0.530072	0.704148	0.668668	0.55645	0.526929	0.566688	0.625477	0.570395	0.428923	0.602199	0.648499	0.520965	0.517774	0.498282	0.70849	0.602109	0.599128	0.567721	0.486789	0.531798	0.548112
Cell_0082	TFEB_TR	Glucose 17 mM + Glutamine 2.500000e-01 mM + Insulin 10000 ng/ml	1.31561	1.82227	1.73994	2.37684	1.11016	1.45822	1.47309	1.93274	1.84474	0.968823	0.887567	1.724	2.39133	1.08109	1.14921	1.64909	1.72911	1.71425	2.15234	1.86564	1.27467	0.989243	0.91728	1.10181	1.22409	0.637014	0.614749	0.849966	0.894048	2.1537	1.97122	1.47382	1.45387	2.02757	1.20881	0.767487	0.966042	1.81845	1.92628	2.78541	1.42632	0.756971	0.530037	3.85181	2.05545	1.01775	1.6747
Cell_0082	FOXO_TR	Glucose 17 mM + Glutamine 2.500000e-01 mM + Insulin 10000 ng/ml	1.4849	1.95465	2.55408	2.35948	1.7575	1.5981	1.27223	2.39032	3.15314	1.43394	1.09075	1.17379	2.59461	2.09381	1.3219	2.36214	1.34358	2.24541	3.20933	2.57052	2.42962	1.26552	1.23239	2.41824	2.13905	1.59272	0.998776	1.02888	2.67863	2.59638	1.34155	1.47247	1.0735	2.5539	2.75352	1.59863	1.22237	1.1288	3.14733	3.02977	1.91855	1.16213	1.26767	2.92318	3.40522	2.11846	2.0592
Cell_0082	AMPKARt2	Glucose 17 mM + Glutamine 2.500000e-01 mM + Insulin 10000 ng/ml	0.600976	0.473369	0.510786	0.566052	0.708131	0.565156	0.507413	0.585013	0.630304	0.625961	0.352009	0.5042	0.486064	0.581987	0.63519	0.66419	0.486226	0.725528	0.537121	0.605456	0.631928	0.516215	0.590509	0.641544	0.506077	0.569977	0.524233	0.728285	0.670106	0.563016	0.530945	0.543779	0.625646	0.55972	0.439902	0.61521	0.654867	0.51344	0.519478	0.516177	0.718806	0.613226	0.588337	0.510576	0.47245	0.550598	0.512525
Cell_0083	TFEB_TR	Glucose 17 mM + Glutamine 2.500000e-01 mM + Insulin 10000 ng/ml	1.58097	1.77278	1.55042	2.11242	1.14837	1.61522	1.47391	2.12193	1.90509	0.987769	0.919634	1.46038	2.4474	0.944749	1.27806	1.7119	1.63404	1.98471	2.35103	1.06361	1.30748	0.966094	0.978534	0.954783	1.32489	0.649762	0.635562	0.812275	1.31145	2.50565	1.81591	1.62803	1.2255	1.92851	1.20893	0.787293	0.919682	2.00898	1.82274	2.69907	1.62971	0.751203	0.542909	3.65083	1.87682	1.02395	1.77258
Cell_0083	FOXO_TR	Glucose 17 mM + Glutamine 2.500000e-01 mM + Insulin 10000 ng/ml	1.5122	1.92045	2.449	2.39724	1.74185	1.5416	1.25892	2.42984	3.03251	1.42818	1.08373	1.15651	2.7167	2.16688	1.31237	2.39125	1.2873	2.74752	3.19538	2.47978	2.51044	1.27943	1.20216	2.3389	2.14904	1.64758	0.977669	1.1067	2.54117	2.61575	1.36371	1.41158	1.01869	2.58614	2.68033	1.63789	1.17954	1.13691	3.38159	3.05308	1.9533	1.12444	1.3055	3.00874	3.43482	2.17813	2.08446
Cell_0083	AMPKARt2	Glucose 17 mM + Glutamine 2.500000e-01 mM + Insulin 10000 ng/ml	0.616317	0.468729	0.513789	0.566689	0.720397	0.580931	0.501657	0.569753	0.647681	0.625529	0.349825	0.50188	0.490178	0.577833	0.645388	0.613598	0.482139	0.682206	0.530111	0.649662	0.622969	0.529525	0.608985	0.639401	0.511709	0.572036	0.527883	0.726508	0.659958	0.561512	0.534002	0.553296	0.623492	0.549328	0.443816	0.620391	0.655534	0.514374	0.52937	0.541009	0.725235	0.614644	0.581719	0.481672	0.443623	0.542001	0.457814
Cell_0084	TFEB_TR	Glucose 17 mM + Glutamine 2.500000e-01 mM + Insulin 10000 ng/ml	1.74979	1.81159	1.46514	1.46209	1.20534	1.79154	1.50648	2.35579	2.03755	0.912051	0.939296	1.13762	2.43954	0.8485	1.32869	1.89587	1.62567	2.06509	2.35702	1.64782	1.45522	0.952899	0.953174	1.1097	1.44629	0.649127	0.684577	1.12288	1.4419	2.20894	1.66371	1.43055	1.21778	2.15025	1.34838	0.818353	0.907771	2.07103	1.8284	2.72373	1.6547	0.741012	0.530465	2.91817	2.0409	1.04426	1.91153
Cell_0084	FOXO_TR	Glucose 17 mM + Glutamine 2.500000e-01 mM + Insulin 10000 ng/ml	1.5359	1.95677	2.52355	2.5817	1.77725	1.44942	1.26605	2.50466	3.02753	1.39491	1.05928	1.091	2.72156	2.15153	1.32545	2.30083	1.24152	3.10851	3.17559	2.56267	2.50185	1.30974	1.40592	2.26579	2.32887	1.65074	0.9599	1.01448	2.4192	2.63924	1.36078	1.38323	0.990255	2.55708	2.73075	1.70231	1.1311	1.18487	3.44052	2.99358	1.96956	1.09007	1.31016	3.07585	3.38886	2.22741	1.96069
Cell_0084	AMPKARt2	Glucose 17 mM + Glutamine 2.500000e-01 mM + Insulin 10000 ng/ml	0.612406	0.460486	0.514161	0.554612	0.73782	0.570075	0.518218	0.567673	0.652427	0.631038	0.333599	0.490674	0.505842	0.570368	0.658931	0.565122	0.480707	0.624129	0.532204	0.637992	0.564036	0.530089	0.611494	0.622205	0.536863	0.551991	0.535867	0.709944	0.65273	0.553305	0.534914	0.542433	0.630251	0.545816	0.430901	0.616413	0.648421	0.525554	0.525741	0.542396	0.717489	0.601244	0.598886	0.47144	0.442549	0.540556	0.459109
Cell_0085	TFEB_TR	Glucose 17 mM + Glutamine 2.500000e-01 mM + Insulin 10000 ng/ml	1.47152	1.88593	1.60344	1.83849	1.26397	1.92909	1.45377	2.52352	2.0562	0.899555	0.959884	1.31184	2.45061	0.934912	1.22879	2.06918	1.73329	2.09475	2.32611	1.25807	1.68717	0.922296	0.938779	1.38977	0.769505	0.662241	0.70967	1.11503	1.12182	1.98283	1.60221	1.10852	1.35202	2.05774	1.43253	0.828882	0.967102	2.04511	2.11915	2.098	1.52839	0.733153	0.494899	3.25831	2.1901	1.04989	2.05078
Cell_0085	FOXO_TR	Glucose 17 mM + Glutamine 2.500000e-01 mM + Insulin 10000 ng/ml	1.42845	2.06354	2.73381	2.74849	1.96765	1.38791	1.19195	2.61025	3.07674	1.3948	1.03135	1.04106	2.77725	2.08564	1.35339	2.16849	1.28384	3.18882	3.04804	2.46393	2.40794	1.30996	1.87545	2.36101	1.40972	1.60626	0.96245	0.987143	2.42206	2.65404	1.33586	1.33583	1.03071	2.51671	2.74261	1.72888	1.12848	1.22099	3.38056	2.95214	2.03807	1.06431	1.21124	3.07402	3.15814	2.17371	1.86384
Cell_0085	AMPKARt2	Glucose 17 mM + Glutamine 2.500000e-01 mM + Insulin 10000 ng/ml	0.597974	0.462747	0.498437	0.537649	0.722564	0.55086	0.51522	0.567756	0.629723	0.637684	0.322457	0.49877	0.49555	0.55437	0.661802	0.550014	0.486572	0.593135	0.514423	0.651183	0.50111	0.524158	0.532655	0.606554	0.664541	0.516638	0.53081	0.711258	0.666407	0.546256	0.529095	0.528652	0.642792	0.529794	0.431183	0.621732	0.646274	0.533957	0.521523	0.521818	0.718935	0.596213	0.616414	0.464845	0.451846	0.559785	0.459637
Cell_0086	TFEB_TR	Glucose 17 mM + Glutamine 2.500000e-01 mM + Insulin 10000 ng/ml	1.35674	1.98429	1.7442	2.6341	1.36825	1.93592	1.39048	2.55423	2.09258	0.966734	0.982704	1.01303	2.53051	1.05694	1.20615	2.42522	1.77614	2.09723	2.23253	0.883457	1.83914	0.969688	1.11583	1.22766	0.605448	0.63741	0.701565	0.892451	1.33515	2.32904	1.70449	1.08161	1.30076	2.15518	1.45179	0.846971	0.970303	1.95935	2.39976	2.77286	1.69469	0.771251	0.486507	3.71636	2.03482	1.03292	2.11335
Cell_0086	FOXO_TR	Glucose 17 mM + Glutamine 2.500000e-01 mM + Insulin 10000 ng/ml	1.34135	2.11528	2.74414	2.77855	2.14053	1.29966	1.18628	2.62292	3.20271	1.43256	1.00999	1.02398	2.87476	2.0612	1.348	2.0494	1.29415	2.98431	2.92825	2.32853	2.40977	1.33126	2.14399	2.5074	1.40658	1.53206	0.963904	1.52849	2.44333	2.65957	1.34437	1.26473	1.08337	2.52405	2.68824	1.74356	1.16486	1.18501	3.42807	2.9661	2.08635	1.04788	1.0984	3.049	2.90278	2.03398	1.76525
Cell_0086	AMPKARt2	Glucose 17 mM + Glutamine 2.500000e-01 mM + Insulin 10000 ng/ml	0.592426	0.45827	0.494558	0.534341	0.706691	0.572063	0.48961	0.548566	0.626865	0.627531	0.32151	0.500643	0.476626	0.564803	0.664158	0.538436	0.488663	0.591967	0.482189	0.662648	0.469154	0.516834	0.463345	0.599957	0.66682	0.507977	0.519949	0.715465	0.670665	0.543736	0.528741	0.544488	0.644143	0.509422	0.444969	0.632359	0.65198	0.549387	0.532165	0.504797	0.726472	0.594997	0.621068	0.465271	0.449357	0.561391	0.443864
Cell_0087	TFEB_TR	Glucose 17 mM + Glutamine 2.500000e-01 mM + Insulin 10000 ng/ml	1.42687	2.12099	1.72054	2.48638	1.43508	1.84643	1.51186	2.45978	2.14927	0.973588	0.989522	0.627521	2.5666	1.06511	1.29911	2.631	1.73158	2.06029	1.97379	1.02761	1.90692	1.11322	1.30251	0.937954	0.662179	0.61116	0.722413	1.03359	1.82634	0.607677	1.7292	1.16168	1.22453	2.73346	1.52568	0.842633	0.913258	1.81708	2.32332	3.97028	1.83998	0.812876	0.490095	3.55387	1.87657	1.02353	2.13194
Cell_0087	FOXO_TR	Glucose 17 mM + Glutamine 2.500000e-01 mM + Insulin 10000 ng/ml	1.3779	2.17016	2.62313	2.73307	2.04915	1.20141	1.28485	2.5534	3.39408	1.41501	0.984277	0.995944	2.88988	2.04899	1.31868	1.97448	1.24365	2.77812	2.95164	2.19159	2.44993	1.3929	2.09769	2.44246	1.3385	1.47159	0.966676	2.17269	2.43243	1.55789	1.37594	1.21687	1.06911	2.47988	2.77775	1.78172	1.15387	1.17484	3.47841	2.93326	2.04561	1.00305	1.0603	3.19307	2.8431	1.90721	1.64124
Cell_0087	AMPKARt2	Glucose 17 mM + Glutamine 2.500000e-01 mM + Insulin 10000 ng/ml	0.591309	0.439183	0.508177	0.542121	0.717228	0.616508	0.493793	0.532656	0.655277	0.621986	0.311439	0.482243	0.476084	0.585594	0.672121	0.526887	0.490718	0.587831	0.478471	0.650561	0.452605	0.528506	0.512153	0.609522	0.678272	0.505544	0.520786	0.686642	0.65076	0.522623	0.538597	0.557548	0.643468	0.51316	0.463	0.626912	0.658917	0.562841	0.54191	0.506219	0.721805	0.593572	0.630923	0.479874	0.440903	0.546487	0.447877
Cell_0088	TFEB_TR	Glucose 17 mM + Glutamine 2.500000e-01 mM + Insulin 10000 ng/ml	1.33771	2.25947	1.74208	2.72938	1.40169	1.81222	1.54154	2.46681	2.13097	0.933251	1.00667	1.35552	2.51037	0.977435	1.36912	2.58665	1.71641	2.16323	1.93107	1.00571	2.02279	1.14382	1.25083	1.0475	0.693067	0.647673	0.739481	1.18022	1.9137	0.671073	1.47559	1.19737	1.30947	2.93184	1.47351	0.850752	0.884947	1.74539	2.21133	3.56598	1.56924	0.815508	0.475653	4.25391	1.9788	1.02087	2.18004
Cell_0088	FOXO_TR	Glucose 17 mM + Glutamine 2.500000e-01 mM + Insulin 10000 ng/ml	1.37629	2.58622	2.70981	2.70817	1.82854	1.19337	1.2076	2.52918	3.36521	1.36247	0.968177	1.00171	2.82565	2.00819	1.32102	1.9091	1.26911	2.81816	3.00135	2.03176	2.37463	1.43655	2.04208	2.31532	1.31509	1.4662	0.968608	2.23579	2.40865	1.71139	1.39659	1.17974	1.02725	2.4405	2.88931	1.78349	1.12415	1.12261	3.51465	2.92956	2.12652	0.933991	1.12098	3.24173	2.95399	1.83988	1.58692
Cell_0088	AMPKARt2	Glucose 17 mM + Glutamine 2.500000e-01 mM + Insulin 10000 ng/ml	0.599115	0.441289	0.507956	0.546234	0.711976	0.639205	0.509153	0.534721	0.657718	0.637544	0.300357	0.487632	0.483852	0.573265	0.671698	0.532371	0.502176	0.566345	0.489436	0.646915	0.436668	0.552897	0.595126	0.61506	0.690359	0.486653	0.530172	0.633422	0.646297	0.537482	0.536665	0.559215	0.657793	0.510619	0.487346	0.602703	0.664576	0.564136	0.539572	0.515299	0.728957	0.60374	0.637109	0.49853	0.435193	0.554543	0.448394
Cell_0089	TFEB_TR	Glucose 17 mM + Glutamine 2.500000e-01 mM + Insulin 10000 ng/ml	1.52074	2.3601	1.84791	0.802708	1.38851	1.82165	1.44156	2.6348	2.16799	0.973589	1.04546	1.33373	2.48235	1.01574	1.31433	2.77498	1.75502	2.22603	2.16823	0.951223	2.10758	1.02251	1.13098	1.17076	0.654918	0.677205	0.714498	1.04384	1.53445	0.684804	1.31687	1.21832	1.34689	2.6622	1.05312	0.902723	0.894709	1.78001	2.39859	2.85981	1.35098	0.789694	0.476474	5.11172	2.06681	1.01363	2.19911
Cell_0089	FOXO_TR	Glucose 17 mM + Glutamine 2.500000e-01 mM + Insulin 10000 ng/ml	1.33996	3.24668	2.84102	1.50023	1.71481	1.24525	1.25399	2.59032	3.16862	1.39703	0.971353	1.0258	2.84088	2.01635	1.32395	1.85596	1.37129	2.90484	3.0012	1.98162	2.25843	1.46105	2.02822	2.3565	1.35912	1.44361	0.965538	2.09711	2.38378	1.82561	1.36678	1.14092	1.05663	2.50717	1.18034	1.76339	1.13277	1.11509	3.57599	2.99669	2.24454	0.896821	1.21095	3.14082	3.03121	1.80815	1.56589
Cell_0089	AMPKARt2	Glucose 17 mM + Glutamine 2.500000e-01 mM + Insulin 10000 ng/ml	0.61693	0.458046	0.493583	0.600751	0.681722	0.629448	0.515346	0.533513	0.648221	0.643583	0.31026	0.502764	0.484635	0.557563	0.667219	0.544504	0.50408	0.567185	0.480881	0.670483	0.429922	0.553972	0.603766	0.601817	0.685184	0.487786	0.531337	0.604407	0.659523	0.530815	0.524004	0.568585	0.668148	0.486286	0.635396	0.578264	0.663891	0.569124	0.530387	0.516066	0.749479	0.615229	0.626903	0.504136	0.440573	0.57433	0.434239
Cell_0090	TFEB_TR	Glucose 17 mM + Glutamine 2.500000e-01 mM + Insulin 10000 ng/ml	1.83616	2.43075	1.88777	0.818005	1.43983	1.73702	1.73866	2.67837	2.27479	1.09458	1.04841	0.486586	2.45761	1.05382	1.19596	2.88275	1.83965	1.95839	2.18005	1.15729	2.04926	0.919307	1.15127	1.01063	0.697293	0.680022	0.703255	0.927205	1.36457	0.679985	1.35451	1.1742	1.22132	2.61767	1.09335	0.918698	0.860492	1.8565	2.49679	3.3343	1.36704	0.768071	0.489055	4.2787	1.87378	0.999693	2.14989
Cell_0090	FOXO_TR	Glucose 17 mM + Glutamine 2.500000e-01 mM + Insulin 10000 ng/ml	1.38062	3.56956	2.8351	1.42907	1.68471	1.25911	2.05261	2.6589	3.23455	1.51416	0.954945	0.978776	2.87663	2.05277	1.27277	1.88535	1.4584	2.83214	2.99865	2.00955	2.1997	1.478	1.99218	2.37102	1.37544	1.3546	0.963886	2.12954	2.33836	1.84928	1.28823	1.12088	1.11334	2.57419	1.22089	1.78953	1.12429	1.67435	3.53998	2.97263	2.12966	0.898866	1.17833	3.14647	3.00494	1.7874	1.5271
Cell_0090	AMPKARt2	Glucose 17 mM + Glutamine 2.500000e-01 mM + Insulin 10000 ng/ml	0.611786	0.441356	0.493097	0.611137	0.666031	0.619983	0.531547	0.529615	0.67658	0.638389	0.326884	0.486269	0.479444	0.566594	0.66892	0.564667	0.497877	0.600671	0.472038	0.682468	0.435203	0.543375	0.570714	0.603547	0.675656	0.499256	0.526653	0.612017	0.649606	0.534861	0.518382	0.578367	0.658856	0.48358	0.612894	0.560618	0.657855	0.55586	0.523195	0.506267	0.737875	0.618082	0.628013	0.502231	0.44246	0.569256	0.43193
Cell_0091	TFEB_TR	Glucose 17 mM + Glutamine 2.500000e-01 mM + Insulin 10000 ng/ml	1.86031	2.47472	1.93285	0.798107	1.48003	1.62388	2.22266	2.52902	1.05051	1.15894	1.01525	2.00746	2.43214	0.928296	1.2869	2.53531	1.89265	1.75211	2.03305	1.18626	2.01074	0.935645	1.14804	0.912788	0.687226	0.741379	0.717883	0.842631	1.65648	0.693481	1.35761	1.20761	1.12616	2.64208	1.13403	0.937711	0.771114	1.94394	2.23902	1.31013	1.38623	0.80673	0.472785	3.33639	1.67111	0.972243	2.19253
Cell_0091	FOXO_TR	Glucose 17 mM + Glutamine 2.500000e-01 mM + Insulin 10000 ng/ml	1.43233	3.48365	2.84859	1.4168	1.64821	1.25196	3.07285	2.62879	1.57008	1.59685	0.917445	1.00421	2.83615	2.01753	1.2547	1.88562	1.48193	2.73205	2.95715	2.01663	2.18008	1.4678	2.01643	2.24737	1.36415	1.29366	0.955936	2.15908	2.30019	1.77076	1.25439	1.12352	1.11163	2.56493	1.26552	1.79788	1.0864	2.56895	3.47759	1.60676	2.10559	0.897021	1.18073	3.16569	2.91531	1.74622	1.53053
Cell_0091	AMPKARt2	Glucose 17 mM + Glutamine 2.500000e-01 mM + Insulin 10000 ng/ml	0.590842	0.414295	0.501708	0.62682	0.666998	0.62314	0.51368	0.535445	0.692447	0.645964	0.327105	0.486961	0.473734	0.573325	0.670558	0.586171	0.505255	0.620765	0.474354	0.669401	0.432321	0.551089	0.557671	0.623193	0.674674	0.48553	0.525839	0.631465	0.632277	0.549085	0.511853	0.58202	0.651068	0.497494	0.615173	0.530318	0.66021	0.511271	0.523883	0.624822	0.696968	0.613024	0.645079	0.50752	0.431252	0.562388	0.436708
Cell_0092	TFEB_TR	Glucose 17 mM + Glutamine 2.500000e-01 mM + Insulin 10000 ng/ml	2.03745	2.46801	1.91611	0.790878	1.50479	1.59324	2.17783	2.49117	0.933675	1.12981	1.01834	3.43407	2.59589	1.0923	1.53222	2.44504	1.82284	1.89267	2.10215	1.05923	2.09219	1.08023	1.07034	1.00022	0.618779	0.836186	0.716015	0.91836	1.35789	0.688435	1.49778	1.35024	1.15995	2.30895	1.07161	1.05252	0.733309	1.93785	2.06616	1.87758	1.50501	0.849804	0.474718	3.97253	1.72639	0.964378	2.37791
Cell_0092	FOXO_TR	Glucose 17 mM + Glutamine 2.500000e-01 mM + Insulin 10000 ng/ml	1.47059	3.29221	2.76822	1.42334	1.58377	1.27379	3.3506	2.55228	1.57809	1.60468	0.91418	1.43295	2.91436	2.02879	1.32962	1.75683	1.37486	2.67846	2.9123	2.04458	2.18319	1.48442	2.06569	2.18632	1.35383	1.31969	0.939173	2.29391	2.34146	1.62996	1.27145	1.12478	1.1106	2.54011	1.27992	1.7217	1.08318	2.85917	3.48962	1.63957	2.26097	0.866013	1.52838	3.1759	2.81463	1.69799	1.53386
Cell_0092	AMPKARt2	Glucose 17 mM + Glutamine 2.500000e-01 mM + Insulin 10000 ng/ml	0.601499	0.418919	0.497062	0.634454	0.660087	0.62339	0.447969	0.533065	0.689174	0.646287	0.320146	0.524887	0.467492	0.579792	0.676916	0.575881	0.504972	0.622706	0.465134	0.669592	0.427375	0.562064	0.555115	0.622069	0.669448	0.473018	0.521421	0.652888	0.643934	0.546311	0.500838	0.578081	0.654827	0.497723	0.631159	0.482631	0.672802	0.487775	0.522781	0.618696	0.666723	0.598089	0.632167	0.515999	0.444722	0.588336	0.440972
Cell_0093	TFEB_TR	Glucose 17 mM + Glutamine 2.500000e-01 mM + Insulin 10000 ng/ml	2.04143	2.49414	1.76169	0.812828	1.53144	1.58432	1.80365	2.61792	1.01048	1.09499	1.04822	1.50589	2.85859	0.892855	1.52017	2.73945	1.80643	2.01027	2.18668	0.980336	2.12084	1.15886	1.12954	1.10981	0.668417	0.880122	0.693538	1.20297	0.890106	0.648241	1.80319	1.32004	1.20186	1.83506	1.07619	1.1937	0.773643	1.87558	2.19961	1.44971	1.60952	0.78856	0.545082	4.8772	1.12588	0.990573	2.49139
Cell_0093	FOXO_TR	Glucose 17 mM + Glutamine 2.500000e-01 mM + Insulin 10000 ng/ml	1.5331	3.13439	2.59284	1.42319	1.51719	1.29057	3.11428	2.51145	1.58273	1.58646	0.93624	2.19099	3.16475	1.45873	1.37447	1.6984	1.26931	2.6386	2.98777	2.04587	2.15873	1.52	2.0509	2.17973	1.34078	1.35304	0.913273	2.49027	2.37581	1.52723	1.23869	1.09906	1.14906	2.54586	1.25947	1.61394	1.09278	2.65795	3.42794	1.62722	2.04723	0.820837	1.96558	3.31349	1.78446	1.73182	1.48287
Cell_0093	AMPKARt2	Glucose 17 mM + Glutamine 2.500000e-01 mM + Insulin 10000 ng/ml	0.621836	0.426392	0.491361	0.61939	0.647337	0.628647	0.414528	0.51926	0.69521	0.631621	0.315537	0.524719	0.460516	0.611958	0.683689	0.560186	0.49498	0.625389	0.456143	0.680911	0.442617	0.56164	0.528817	0.60991	0.671201	0.477482	0.520725	0.663614	0.655951	0.545478	0.500939	0.562479	0.655107	0.506644	0.638306	0.450056	0.681773	0.500219	0.52095	0.622272	0.64936	0.592685	0.588217	0.517983	0.518494	0.608322	0.451741
Cell_0094	TFEB_TR	Glucose 17 mM + Glutamine 2.500000e-01 mM + Insulin 10000 ng/ml	1.42241	2.60963	1.78423	0.829163	1.5578	1.55712	1.65731	2.6926	0.956056	1.07525	1.04592	0.527098	2.8959	0.82015	1.36922	2.69725	1.98433	2.02334	2.14172	0.817682	2.05878	1.01549	1.24351	1.12698	0.713526	0.876142	0.669499	1.08966	1.72939	0.64946	1.89801	1.17587	1.25611	1.71445	1.1736	1.30757	0.80938	1.96477	2.32333	0.963597	1.48475	0.716118	0.628762	5.00186	0.966592	1.01779	2.46491
Cell_0094	FOXO_TR	Glucose 17 mM + Glutamine 2.500000e-01 mM + Insulin 10000 ng/ml	1.54052	3.1539	2.68537	1.39984	1.50752	1.26926	2.97568	2.41905	1.60127	1.55038	0.930144	2.69632	3.2916	1.50711	1.34287	1.71914	1.50791	2.71143	3.08974	2.00836	2.05584	1.46602	2.02875	2.15184	1.36494	1.34016	0.90398	2.42155	2.32018	1.52556	1.17527	1.05035	1.16357	2.57603	1.25569	1.52386	1.07354	2.66559	3.32534	1.59175	1.66548	0.802603	2.08776	3.39121	1.8672	1.82647	1.46364
Cell_0094	AMPKARt2	Glucose 17 mM + Glutamine 2.500000e-01 mM + Insulin 10000 ng/ml	0.606696	0.420006	0.500036	0.603315	0.64215	0.640457	0.422569	0.515173	0.700211	0.636574	0.309801	0.490154	0.45729	0.60407	0.667126	0.587201	0.51543	0.620348	0.473295	0.668206	0.440465	0.564494	0.505184	0.616168	0.680793	0.474059	0.533428	0.654053	0.644871	0.555802	0.503472	0.55356	0.649829	0.527295	0.633057	0.446256	0.684232	0.507223	0.528208	0.630254	0.640263	0.607508	0.570587	0.512785	0.545565	0.579873	0.457629
Cell_0095	TFEB_TR	Glucose 17 mM + Glutamine 2.500000e-01 mM + Insulin 10000 ng/ml	1.32447	2.62744	2.00419	0.843211	1.60525	1.5055	1.69213	2.73521	0.806927	1.02723	1.03261	1.64858	2.79625	0.768175	1.45771	2.50316	2.16012	2.06247	0.923531	0.863971	2.04141	0.926543	1.21333	1.05617	0.670312	0.850529	0.666511	0.771231	2.25788	0.711801	1.71156	1.24796	1.39711	2.08486	1.06561	1.39506	0.800566	2.05988	2.32981	1.16203	1.33098	0.753683	0.678076	4.61126	1.05849	1.1017	2.47265
Cell_0095	FOXO_TR	Glucose 17 mM + Glutamine 2.500000e-01 mM + Insulin 10000 ng/ml	1.48076	3.32863	2.92742	1.33301	1.51902	1.25641	2.96628	2.33106	1.64474	1.45557	0.91105	2.67929	3.23155	1.44308	1.33613	1.59948	2.03815	2.89172	1.69546	2.086	1.95313	1.45854	2.02325	2.25426	1.4335	1.33577	0.923206	2.28679	2.30712	1.54438	1.16089	1.00987	1.15871	2.59321	1.28021	1.45651	1.06267	2.75866	3.32195	1.5395	1.64454	0.820055	2.03018	3.36092	1.88001	1.83781	1.47805
Cell_0095	AMPKARt2	Glucose 17 mM + Glutamine 2.500000e-01 mM + Insulin 10000 ng/ml	0.589702	0.424158	0.505762	0.611527	0.639287	0.643649	0.424725	0.519563	0.699251	0.651994	0.308672	0.499934	0.461758	0.604827	0.641014	0.615828	0.543629	0.61802	0.615174	0.645969	0.429475	0.574328	0.528109	0.62881	0.669341	0.460919	0.530566	0.649197	0.646834	0.553303	0.48575	0.572201	0.643303	0.526416	0.623082	0.446328	0.690604	0.501488	0.524259	0.632574	0.645118	0.613588	0.591386	0.504004	0.542645	0.530961	0.457608
Cell_0096	TFEB_TR	Glucose 17 mM + Glutamine 2.500000e-01 mM + Insulin 10000 ng/ml	1.82812	2.50349	2.08412	0.867481	1.64751	1.44475	1.74975	2.73475	0.870176	0.951347	1.0438	1.2792	2.91496	0.809986	1.58855	2.59205	2.23948	1.93883	0.886118	1.16495	1.99434	1.0193	1.19479	1.10571	0.739642	0.861951	0.68249	0.947045	1.34659	0.718195	1.59723	1.41339	1.46266	2.36242	0.886164	1.4133	0.78105	1.92973	2.28802	1.4246	1.26877	0.832041	0.707243	3.93148	1.09588	1.29971	2.55049
Cell_0096	FOXO_TR	Glucose 17 mM + Glutamine 2.500000e-01 mM + Insulin 10000 ng/ml	1.46299	3.39159	3.04119	1.32248	1.47045	1.31793	3.0926	2.41863	1.70334	1.33137	0.913912	2.52212	3.30549	1.41295	1.34268	1.52297	2.40732	3.01156	1.69236	2.25061	1.91399	1.71443	2.01195	2.46704	1.48351	1.35669	0.886698	2.26732	2.3408	1.53656	1.17267	1.03099	1.156	2.57177	1.28641	1.39491	1.04899	2.73416	3.27621	1.51458	1.65152	0.838298	1.99616	3.42057	1.84124	1.75403	1.44483
Cell_0096	AMPKARt2	Glucose 17 mM + Glutamine 2.500000e-01 mM + Insulin 10000 ng/ml	0.603326	0.434317	0.500283	0.621469	0.627566	0.635944	0.436586	0.524873	0.702595	0.640791	0.310012	0.53933	0.470343	0.599996	0.635813	0.604903	0.534611	0.618712	0.638175	0.639625	0.507627	0.569754	0.556443	0.632995	0.663635	0.454055	0.514479	0.659157	0.669777	0.553163	0.466864	0.596276	0.635419	0.512694	0.617732	0.448289	0.698111	0.503999	0.512694	0.626773	0.649417	0.607677	0.613691	0.501003	0.532734	0.496463	0.463316
Cell_0097	TFEB_TR	Glucose 17 mM + Glutamine 2.500000e-01 mM + Insulin 10000 ng/ml	1.71229	2.4736	2.07432	0.891664	1.63971	1.47863	1.82936	2.6855	0.965554	0.93763	1.04953	1.87712	3.17009	0.884467	1.58293	2.62996	2.30438	1.72867	0.909609	1.1869	1.84849	1.04254	1.29645	0.823089	0.856872	0.984548	0.681589	1.10207	1.3388	0.657311	1.81279	1.31161	1.3433	2.36563	0.932177	1.39925	0.795886	1.79268	2.15642	1.47419	1.2727	0.881792	0.722461	3.52167	0.951901	1.51953	2.51376
Cell_0097	FOXO_TR	Glucose 17 mM + Glutamine 2.500000e-01 mM + Insulin 10000 ng/ml	1.48779	3.34249	3.21586	1.42074	1.40398	1.44222	3.31187	2.54854	1.75018	1.26366	0.920619	2.50813	3.52181	1.48656	1.28815	1.68051	2.53317	2.99228	1.74202	2.31451	1.87512	2.02127	2.05936	1.37382	1.47742	1.34144	0.914027	2.13284	2.31534	1.57345	1.15951	1.07913	1.11308	2.56831	1.25825	1.32117	0.996041	2.74781	3.15455	1.56553	1.51624	0.845319	2.00195	3.46765	1.78298	1.68859	1.38386
Cell_0097	AMPKARt2	Glucose 17 mM + Glutamine 2.500000e-01 mM + Insulin 10000 ng/ml	0.615486	0.43911	0.498052	0.60922	0.614478	0.61591	0.459567	0.529294	0.705773	0.619858	0.305726	0.548501	0.471344	0.585699	0.64019	0.594174	0.51033	0.601435	0.642218	0.634405	0.618421	0.545765	0.550902	0.495673	0.683401	0.458407	0.524845	0.668768	0.672964	0.570271	0.478824	0.593128	0.639831	0.510724	0.623712	0.473487	0.693437	0.514073	0.525957	0.621927	0.644946	0.614873	0.623401	0.517126	0.53156	0.486786	0.46461
Cell_0098	TFEB_TR	Glucose 17 mM + Glutamine 2.500000e-01 mM + Insulin 10000 ng/ml	1.53412	2.56734	2.13302	0.898582	1.61906	1.56568	1.82915	2.94967	0.929084	1.03059	1.03237	4.51837	3.2124	0.867771	1.74137	2.49707	2.27552	1.66888	0.93347	1.09066	1.77539	1.08551	1.36691	0.73765	0.792612	1.11951	0.675052	1.0266	2.0041	0.685013	2.04154	1.09497	1.20687	2.64794	1.01325	1.40299	0.832204	1.79015	2.05924	1.53448	1.36107	0.889548	0.723166	3.63153	0.881322	1.67715	2.33024
Cell_0098	FOXO_TR	Glucose 17 mM + Glutamine 2.500000e-01 mM + Insulin 10000 ng/ml	1.48434	3.35835	3.46592	1.46613	1.37884	1.5178	3.34989	2.60098	1.77801	1.24638	0.912196	2.48518	3.52111	1.5443	1.2241	1.79979	2.66003	2.85703	1.7666	2.22259	1.86607	2.06908	2.20036	1.35487	1.42162	1.29209	1.33603	2.02426	2.35041	1.65124	1.1261	1.0338	1.0755	2.65397	1.24349	1.27177	0.997984	2.72063	3.14902	1.61754	1.5244	0.846435	2.10143	3.38299	1.72101	1.65889	1.32553
Cell_0098	AMPKARt2	Glucose 17 mM + Glutamine 2.500000e-01 mM + Insulin 10000 ng/ml	0.617241	0.442815	0.500883	0.598243	0.612216	0.603839	0.4613	0.524833	0.700442	0.61615	0.310022	0.531957	0.462366	0.588496	0.636605	0.607888	0.491682	0.592451	0.627976	0.626212	0.610658	0.534113	0.546177	0.512872	0.663478	0.465226	0.530698	0.678674	0.655431	0.568371	0.498256	0.589931	0.653781	0.514249	0.636182	0.508085	0.687812	0.509378	0.539945	0.622745	0.64266	0.619202	0.627184	0.549628	0.526146	0.507256	0.465135
Cell_0099	TFEB_TR	Glucose 17 mM + Glutamine 2.500000e-01 mM + Insulin 10000 ng/ml	1.83765	2.66126	2.15248	0.880886	1.62497	1.60198	1.75399	3.19966	0.938763	1.10132	1.02701	4.02101	3.12968	0.788198	2.04729	2.47964	2.14001	1.62616	0.921722	1.20131	1.76198	1.23419	1.39192	0.712347	0.718236	1.13072	0.709354	1.30215	0.817656	0.775062	1.86619	1.14746	1.17254	2.77364	0.999446	1.39726	0.866406	1.75265	2.17116	1.47864	1.37522	0.83992	0.721979	3.5747	0.909953	1.75603	2.31487
Cell_0099	FOXO_TR	Glucose 17 mM + Glutamine 2.500000e-01 mM + Insulin 10000 ng/ml	1.52806	3.41234	3.54811	1.40645	1.37002	1.45879	3.30445	2.61885	1.80495	1.21643	0.902964	2.39663	3.43343	1.55019	1.2017	1.79093	2.71317	2.76756	1.73219	2.0191	1.98641	1.98283	2.34572	1.30466	1.36488	1.27237	1.98672	2.17916	1.69861	1.68182	1.11593	1.07135	1.11896	2.75797	1.28453	1.26108	1.07865	2.69673	3.20659	1.60613	1.51773	0.837185	2.2341	3.28198	1.68243	1.58761	1.29299
Cell_0099	AMPKARt2	Glucose 17 mM + Glutamine 2.500000e-01 mM + Insulin 10000 ng/ml	0.63278	0.438238	0.502825	0.609798	0.608306	0.616971	0.456311	0.517399	0.70096	0.615016	0.332784	0.514403	0.458031	0.609835	0.633868	0.623478	0.473669	0.601395	0.627523	0.631797	0.547018	0.546102	0.541446	0.511363	0.595699	0.468222	0.495982	0.680121	0.561677	0.55595	0.49131	0.610889	0.647111	0.521497	0.643484	0.524436	0.700805	0.485482	0.534798	0.621021	0.643168	0.603218	0.623881	0.571105	0.519148	0.533346	0.478818
Cell_0100	TFEB_TR	Glucose 17 mM + Glutamine 2.500000e-01 mM + Insulin 10000 ng/ml	1.71425	2.74691	2.09263	0.879626	1.62131	1.69244	1.76379	2.64471	0.983965	1.12587	1.04102	1.2494	3.23918	0.742761	2.00674	2.58068	2.1302	1.58874	0.930784	1.15362	1.67432	1.16779	1.40795	0.782013	0.907231	1.12329	0.774563	1.45144	0.806492	0.759385	1.56502	1.25718	1.21139	2.36188	1.03396	1.43139	0.903701	1.71928	2.38482	1.30523	1.23435	0.808014	0.730046	3.18912	0.928786	1.7362	2.51757
Cell_0100	FOXO_TR	Glucose 17 mM + Glutamine 2.500000e-01 mM + Insulin 10000 ng/ml	1.82633	3.44844	3.47774	1.39485	1.35331	1.39485	3.43391	2.4445	1.83227	1.19891	0.908719	2.4147	3.63755	1.56269	1.17639	1.80177	2.57659	2.84481	1.72052	1.80846	2.1018	1.97843	2.37582	1.26668	1.35941	1.29338	2.33011	2.32093	1.67702	1.62712	1.12581	1.5278	1.16837	2.76379	1.32298	1.25335	1.05853	2.85271	3.15856	1.56105	1.40036	0.839147	2.30515	3.24309	1.68189	1.46011	1.30287
Cell_0100	AMPKARt2	Glucose 17 mM + Glutamine 2.500000e-01 mM + Insulin 10000 ng/ml	0.645612	0.431399	0.505239	0.621005	0.59351	0.61782	0.458261	0.516814	0.70949	0.606737	0.361778	0.506518	0.463575	0.612458	0.639671	0.628295	0.471759	0.591564	0.644702	0.639108	0.544405	0.552314	0.515383	0.518638	0.555596	0.472737	0.471716	0.666066	0.567363	0.579247	0.479926	0.600924	0.631378	0.536604	0.637129	0.528442	0.71794	0.474558	0.542239	0.622248	0.641762	0.597427	0.609843	0.563959	0.521246	0.537099	0.48106
Cell_0101	TFEB_TR	Glucose 17 mM + Glutamine 2.500000e-01 mM + Insulin 10000 ng/ml	1.63204	2.76089	1.26505	0.901254	1.56516	1.8557	1.82352	2.03959	0.979041	1.2105	1.04229	0.958861	3.39914	0.788856	1.64687	2.61603	2.28444	1.68316	0.973252	0.997017	1.6404	1.05773	1.4145	0.876267	1.2662	1.17394	0.828634	1.26385	0.816152	0.701938	1.51586	1.12788	1.28278	1.19181	1.07873	1.51807	0.907868	1.81586	2.45138	1.21691	1.14382	0.84348	0.742705	2.94415	0.998308	1.69045	2.44722
Cell_0101	FOXO_TR	Glucose 17 mM + Glutamine 2.500000e-01 mM + Insulin 10000 ng/ml	2.39908	3.48809	1.46314	1.44221	1.32228	1.61503	3.54185	2.202	1.89982	1.22125	0.918319	2.5748	3.81213	1.58939	1.13441	1.73909	2.50369	2.89363	1.75489	1.70764	2.06227	1.9914	2.31629	1.25291	1.36901	1.30753	2.30008	2.25749	1.68577	1.52741	1.10385	2.16952	1.1738	1.41979	1.29005	1.26565	0.999619	2.9607	3.08276	1.52703	1.38366	0.863095	2.34258	3.31727	1.71602	1.35668	1.25637
Cell_0101	AMPKARt2	Glucose 17 mM + Glutamine 2.500000e-01 mM + Insulin 10000 ng/ml	0.640059	0.43856	0.676621	0.609533	0.598139	0.600759	0.451764	0.522183	0.709752	0.602712	0.390781	0.512659	0.468578	0.596524	0.645856	0.628373	0.486907	0.582214	0.649359	0.628036	0.556437	0.542569	0.499972	0.534676	0.548875	0.472936	0.483917	0.660439	0.571225	0.600544	0.487925	0.558223	0.638674	0.612774	0.622538	0.528429	0.716874	0.488678	0.547004	0.635321	0.643503	0.613708	0.596077	0.54886	0.524213	0.534882	0.468807
Cell_0102	TFEB_TR	Glucose 17 mM + Glutamine 2.500000e-01 mM + Insulin 10000 ng/ml	2.32772	2.66434	1.32815	0.880007	1.49251	1.9697	1.78985	2.33849	1.08087	1.25634	1.03941	1.57608	3.19653	0.899496	1.65994	2.56027	2.29309	1.67822	0.997052	1.11601	1.67124	1.26077	1.54051	0.929553	1.46625	1.12793	0.855577	1.46613	0.830028	0.717111	1.69927	1.13396	1.35204	1.03301	1.06165	1.52196	0.88364	1.94709	2.36078	1.26425	1.24921	0.867223	0.744617	2.96348	1.07072	1.70483	2.14748
Cell_0102	FOXO_TR	Glucose 17 mM + Glutamine 2.500000e-01 mM + Insulin 10000 ng/ml	2.88726	3.50239	1.44728	1.46704	1.28852	2.17791	3.44551	2.29753	2.0563	1.22425	0.908195	2.70209	3.57828	1.57981	1.10628	1.62677	2.58173	2.86972	1.77903	1.70546	2.01956	1.97631	2.32081	1.24873	1.34936	1.27376	2.17945	2.19576	1.70499	1.4741	1.08736	2.45134	1.22134	1.42908	1.25181	1.29022	1.24953	2.89923	3.10968	1.57006	1.40212	0.87044	2.32348	3.41973	1.74814	1.33769	1.1741
Cell_0102	AMPKARt2	Glucose 17 mM + Glutamine 2.500000e-01 mM + Insulin 10000 ng/ml	0.6442	0.445246	0.658529	0.594187	0.638081	0.596471	0.445714	0.537367	0.707236	0.605742	0.412377	0.512695	0.469004	0.597998	0.639554	0.634045	0.490058	0.600523	0.647626	0.617337	0.552666	0.529821	0.509784	0.53236	0.531435	0.471657	0.501532	0.662659	0.575924	0.579087	0.500095	0.569225	0.643506	0.614233	0.622134	0.515381	0.703634	0.493459	0.526711	0.643191	0.656577	0.624966	0.596548	0.54843	0.521874	0.544965	0.477761
Cell_0103	TFEB_TR	Glucose 17 mM + Glutamine 2.500000e-01 mM + Insulin 10000 ng/ml	2.57732	2.59755	1.23655	0.840539	1.47622	2.06822	1.75121	0.773743	1.20198	1.19252	1.06843	0.937742	2.76337	0.934724	2.07762	2.55082	2.0948	1.47862	0.999198	1.17712	1.60929	1.34489	1.65326	0.966283	1.33287	1.01003	0.864635	1.56846	0.83288	0.732515	1.99493	1.43477	1.41288	0.991481	1.01033	1.45678	0.875573	2.0152	1.18444	1.42196	1.39425	0.850511	0.75406	3.17244	0.973197	1.72097	2.19358
Cell_0103	FOXO_TR	Glucose 17 mM + Glutamine 2.500000e-01 mM + Insulin 10000 ng/ml	3.00491	3.44296	1.45243	1.50117	1.29084	2.72166	3.3491	1.07829	2.18736	1.20225	0.932064	2.64875	3.32932	1.52201	1.09127	1.60566	2.56818	2.99973	1.79065	1.71683	2.07079	2.03476	2.36958	1.27798	1.34061	1.23568	2.17418	2.23725	1.69476	1.48613	1.12049	2.3844	1.29129	1.40312	1.25912	1.27436	1.79497	2.89674	1.62619	1.68172	1.39859	0.879096	2.25847	3.3836	1.72343	1.36174	1.20494
Cell_0103	AMPKARt2	Glucose 17 mM + Glutamine 2.500000e-01 mM + Insulin 10000 ng/ml	0.656587	0.438751	0.661549	0.599549	0.673667	0.573239	0.443871	0.639979	0.703866	0.610191	0.415186	0.495064	0.46977	0.612434	0.626625	0.639585	0.468637	0.608201	0.653048	0.626812	0.565186	0.519103	0.535128	0.524831	0.51002	0.484482	0.517445	0.656314	0.583689	0.56835	0.506408	0.619037	0.628266	0.617364	0.639214	0.502491	0.697406	0.480228	0.531378	0.637968	0.674694	0.625595	0.597996	0.551129	0.530926	0.551733	0.487926
Cell_0104	TFEB_TR	Glucose 17 mM + Glutamine 2.500000e-01 mM + Insulin 10000 ng/ml	1.99559	2.63623	1.12184	0.852146	1.46406	2.15016	1.86575	0.759076	1.07382	1.15815	1.11715	0.686105	2.68628	0.893189	2.13313	2.52943	2.06232	1.44849	1.00266	0.953408	1.59132	1.14829	1.49998	0.976033	1.15045	1.01253	0.864036	1.016	0.843538	0.722742	1.96463	1.52151	1.46257	0.973139	0.921712	1.48604	0.835669	2.02127	1.11741	1.47039	1.30728	0.809842	0.794839	3.2456	0.841899	1.69705	2.34102
Cell_0104	FOXO_TR	Glucose 17 mM + Glutamine 2.500000e-01 mM + Insulin 10000 ng/ml	2.9413	3.33384	1.4662	1.51832	1.31196	2.90532	3.39136	1.0956	2.15429	1.20776	1.10579	2.5064	3.3762	1.5082	1.08958	1.50135	2.44791	3.15054	1.82005	1.67989	2.09391	2.14245	2.34296	1.33644	1.35846	1.24473	2.38142	2.23124	1.67501	1.47136	1.11755	2.34192	1.28714	1.37851	1.24899	1.26692	2.27817	2.9946	1.61836	1.72336	1.41261	0.990056	2.2408	3.38013	1.7001	1.36052	1.1995
Cell_0104	AMPKARt2	Glucose 17 mM + Glutamine 2.500000e-01 mM + Insulin 10000 ng/ml	0.647777	0.438923	0.677436	0.614407	0.676856	0.523606	0.428824	0.6452	0.685347	0.609165	0.415815	0.489068	0.480249	0.611841	0.629457	0.634006	0.433058	0.594862	0.648553	0.632833	0.573825	0.517466	0.570959	0.533386	0.508205	0.48993	0.524634	0.65688	0.583444	0.588943	0.507319	0.624992	0.628599	0.619996	0.643726	0.508925	0.705016	0.481055	0.564012	0.628032	0.676999	0.624357	0.586849	0.54644	0.54973	0.542673	0.476294
Cell_0105	TFEB_TR	Glucose 17 mM + Glutamine 2.500000e-01 mM + Insulin 10000 ng/ml	1.69253	2.69816	1.07296	0.88912	1.37622	2.11601	1.98452	0.782127	0.99013	1.18692	1.15403	1.12113	1.05222	0.950373	1.87999	2.38376	2.22159	1.66681	0.990772	0.917504	1.71627	1.2062	1.33165	0.919242	1.23713	1.05079	0.838171	0.702235	0.866421	0.733964	1.5115	1.25987	1.46472	1.00167	0.874331	1.5728	0.803143	2.02505	1.1184	1.31018	1.12393	0.750884	0.819542	0.526837	0.96805	1.67636	2.26147
Cell_0105	FOXO_TR	Glucose 17 mM + Glutamine 2.500000e-01 mM + Insulin 10000 ng/ml	2.90524	3.27855	1.45823	1.46768	1.29457	2.81934	3.45618	1.12314	2.04215	1.22442	1.38788	2.45758	2.38514	1.60075	1.10555	1.42577	2.37839	3.12831	1.83685	1.60402	2.07072	2.19887	2.33209	1.37589	1.37932	1.22603	2.63363	2.09711	1.68693	1.41289	1.06703	2.38535	1.26004	1.35803	1.21023	1.29546	2.54165	3.08061	1.63126	1.65977	1.31745	1.21048	2.23259	1.34991	1.79196	1.34796	1.12523
Cell_0105	AMPKARt2	Glucose 17 mM + Glutamine 2.500000e-01 mM + Insulin 10000 ng/ml	0.633185	0.454506	0.685851	0.614954	0.668969	0.500382	0.41651	0.649049	0.667558	0.602312	0.431266	0.505787	0.606892	0.595762	0.642883	0.639472	0.408273	0.60311	0.639497	0.619464	0.568064	0.525649	0.576574	0.539953	0.520352	0.484064	0.518045	0.666581	0.568196	0.595969	0.501083	0.601819	0.644285	0.619336	0.629018	0.515275	0.710885	0.493023	0.578801	0.60586	0.669775	0.619523	0.579492	0.625092	0.534389	0.533005	0.489012
Cell_0106	TFEB_TR	Glucose 17 mM + Glutamine 2.500000e-01 mM + Insulin 10000 ng/ml	1.59471	2.71016	1.04586	0.935723	1.32933	2.00884	1.91175	0.801566	1.14893	1.22914	1.17927	1.25971	1.69146	1.01357	1.90654	2.39969	2.18769	1.76453	0.985519	1.12011	1.77438	1.3529	1.334	0.849746	1.39086	1.02902	0.7903	0.901254	0.875391	0.743882	1.32649	1.06998	1.36966	1.09048	0.898748	1.56404	0.926551	2.11218	1.23169	1.23908	1.21913	0.771286	0.794564	0.509714	1.19547	1.64991	2.49099
Cell_0106	FOXO_TR	Glucose 17 mM + Glutamine 2.500000e-01 mM + Insulin 10000 ng/ml	2.79277	3.31964	1.4512	1.44547	1.26497	2.63443	3.4399	1.17676	1.97589	1.2257	1.58143	2.49256	2.59411	1.68008	1.11467	1.8888	2.36371	3.15581	1.82544	1.59158	2.05618	2.21539	2.39943	1.37585	1.41486	1.17961	2.69713	1.98543	1.69575	1.39021	1.07533	2.37142	1.25546	1.35125	1.16201	1.28633	2.65016	3.10477	1.62035	1.60401	1.22172	1.37772	2.17278	1.3595	1.92489	1.35823	1.49317
Cell_0106	AMPKARt2	Glucose 17 mM + Glutamine 2.500000e-01 mM + Insulin 10000 ng/ml	0.632449	0.460719	0.686676	0.606901	0.674122	0.487054	0.433748	0.652691	0.668315	0.601743	0.440267	0.519321	0.614751	0.579955	0.642934	0.673006	0.418149	0.637965	0.637274	0.611891	0.579021	0.531063	0.543478	0.531361	0.531234	0.50151	0.522338	0.676281	0.558213	0.593781	0.500484	0.588672	0.643973	0.61827	0.622182	0.513572	0.701576	0.488164	0.577599	0.58476	0.679875	0.619283	0.583435	0.641992	0.482062	0.534478	0.514145
Cell_0107	TFEB_TR	Glucose 17 mM + Glutamine 2.500000e-01 mM + Insulin 10000 ng/ml	1.22632	2.6693	1.10443	0.991565	1.38556	1.92355	1.84478	0.765848	1.0926	1.24218	1.19812	1.40816	1.42665	0.879787	1.86665	2.58497	2.05937	0.763536	1.01322	1.07085	1.75998	1.18683	1.35616	0.832902	1.39098	1.05045	0.777446	0.969664	0.879908	0.756815	1.39285	1.13621	1.19142	1.05949	0.911874	1.49509	1.11577	2.22864	1.24463	1.26373	1.41974	0.891088	0.786935	0.536661	1.1803	1.61835	2.93389
Cell_0107	FOXO_TR	Glucose 17 mM + Glutamine 2.500000e-01 mM + Insulin 10000 ng/ml	2.59626	3.37612	1.45948	1.45972	1.28503	2.37581	3.42047	1.22102	1.92223	1.2239	1.62822	2.57915	2.58903	1.59453	1.11394	2.67814	2.36655	1.06786	1.85311	1.65103	2.11658	2.23881	2.45638	1.35958	1.42685	1.1886	2.67532	1.98669	1.66649	1.40621	1.11003	2.35784	1.2093	1.38861	1.09902	1.27992	2.71319	3.09915	1.62215	1.58333	1.29797	1.38462	2.17864	1.32211	1.93194	1.36445	2.39381
Cell_0107	AMPKARt2	Glucose 17 mM + Glutamine 2.500000e-01 mM + Insulin 10000 ng/ml	0.630199	0.446724	0.686791	0.610393	0.688258	0.465924	0.467321	0.660589	0.670374	0.609238	0.429933	0.523969	0.613677	0.578445	0.638214	0.700597	0.436226	0.706182	0.624193	0.615479	0.601947	0.529349	0.537313	0.530838	0.54079	0.512784	0.529291	0.699696	0.566605	0.605194	0.509071	0.577784	0.639495	0.623477	0.623247	0.531596	0.691354	0.477978	0.58107	0.592517	0.693387	0.624276	0.589012	0.644768	0.45099	0.53955	0.481889
Cell_0108	TFEB_TR	Glucose 17 mM + Glutamine 2.500000e-01 mM + Insulin 10000 ng/ml	1.09562	2.61685	1.14954	1.02468	1.39153	1.92889	1.93662	0.730825	0.933992	1.16709	1.19884	1.60863	1.22323	0.783485	1.56302	2.547	2.17189	0.846195	1.00871	0.832682	1.90693	1.13356	1.45929	0.835308	1.31294	1.01688	0.821565	0.923944	0.907087	0.795032	1.28644	1.19217	1.11559	1.02672	0.962665	1.45802	1.14796	2.2616	1.10004	1.13453	1.39995	0.955471	0.834195	0.541213	1.10471	1.63739	2.95665
Cell_0108	FOXO_TR	Glucose 17 mM + Glutamine 2.500000e-01 mM + Insulin 10000 ng/ml	2.47818	3.40831	1.45491	1.39566	1.3186	2.28904	3.50139	1.22682	1.83667	1.22672	1.61632	2.77994	2.57237	1.44583	1.12593	3.08249	2.35596	1.0348	1.91208	1.64372	2.42547	2.30836	2.52705	1.3494	1.35636	1.13357	2.71357	1.96573	1.65325	1.40957	1.09675	2.43014	1.14614	1.41268	1.09325	1.32738	2.74825	3.167	1.67927	1.55353	1.3208	1.36482	2.36985	1.33303	1.81596	1.39659	3.14821
Cell_0108	AMPKARt2	Glucose 17 mM + Glutamine 2.500000e-01 mM + Insulin 10000 ng/ml	0.625837	0.444778	0.684506	0.616087	0.688905	0.504014	0.487876	0.6655	0.666888	0.613665	0.424779	0.529207	0.61451	0.585266	0.643028	0.696463	0.419519	0.706752	0.612302	0.609868	0.593222	0.516106	0.569793	0.534375	0.559938	0.491674	0.521086	0.724817	0.574536	0.613056	0.5103	0.570938	0.649229	0.634319	0.617912	0.558505	0.692932	0.478383	0.590018	0.600091	0.688836	0.617607	0.598088	0.639734	0.44684	0.552198	0.428101
Cell_0109	TFEB_TR	Glucose 17 mM + Glutamine 2.500000e-01 mM + Insulin 10000 ng/ml	1.36202	2.57903	0.955713	1.06767	1.34672	2.00031	1.99114	0.736496	1.11736	1.11519	1.1866	1.36862	1.36428	0.950697	1.62972	2.48583	2.2952	0.964723	0.967146	0.847327	2.17597	1.2696	1.13653	0.826788	1.16193	0.874051	0.858543	0.972196	0.931763	0.815655	1.47321	1.02596	1.25895	1.16102	1.03403	1.40439	1.08698	2.24634	1.14946	1.17329	1.31823	0.929198	0.870478	0.535456	1.27643	1.69025	2.95725
Cell_0109	FOXO_TR	Glucose 17 mM + Glutamine 2.500000e-01 mM + Insulin 10000 ng/ml	2.42544	3.41489	1.47771	1.30873	1.30833	2.46491	3.58581	1.21521	1.74585	1.23918	1.59584	2.96686	2.63228	1.44868	1.14005	3.065	2.28995	1.04446	1.89713	1.53803	2.90429	2.41079	1.20876	1.32787	1.28479	1.12564	2.68695	1.91837	1.68835	1.4028	1.09857	2.48599	1.13566	1.39705	1.1462	1.32164	2.69201	3.26826	1.70446	1.54767	1.22809	1.44045	2.59873	1.43198	1.6717	1.50859	3.38693
Cell_0109	AMPKARt2	Glucose 17 mM + Glutamine 2.500000e-01 mM + Insulin 10000 ng/ml	0.627225	0.470116	0.684587	0.605382	0.675435	0.58748	0.483416	0.658829	0.664388	0.619243	0.432644	0.52718	0.625492	0.581363	0.645014	0.688875	0.397803	0.716507	0.627749	0.602064	0.535664	0.490277	0.457652	0.503341	0.586749	0.49585	0.526093	0.724379	0.573746	0.618007	0.510514	0.567318	0.656448	0.638821	0.624303	0.563601	0.693666	0.477649	0.587989	0.580747	0.687906	0.607656	0.610819	0.643889	0.43245	0.574015	0.431105
Cell_0110	TFEB_TR	Glucose 17 mM + Glutamine 2.500000e-01 mM + Insulin 10000 ng/ml	1.57884	2.52885	0.829402	1.12258	1.384	1.9375	1.9834	0.736386	1.24499	1.19265	1.20146	1.43179	1.22339	1.09387	1.95403	2.58858	2.15563	0.947133	0.967876	1.02884	2.31168	1.12383	1.11261	0.844409	1.0247	0.894423	0.868472	0.983311	0.932424	0.798508	1.9829	1.03626	1.41507	1.09933	1.01749	1.34856	1.11453	2.23935	1.35595	1.65165	1.23514	0.906148	0.856786	0.560657	1.44241	1.72282	3.20872
Cell_0110	FOXO_TR	Glucose 17 mM + Glutamine 2.500000e-01 mM + Insulin 10000 ng/ml	2.42045	3.35931	1.54728	1.28692	1.31139	2.48117	3.58462	1.19469	1.67804	1.21558	1.6169	2.95289	2.63876	1.50577	1.14861	2.97597	2.17209	1.03583	1.83906	1.43512	3.1442	2.45897	1.17023	1.28565	1.30069	1.59429	2.56397	1.93895	1.71681	1.40096	1.10086	2.53708	1.13239	1.41234	1.12554	1.28146	2.68477	3.30435	1.67965	1.58242	1.22666	1.4813	2.63714	1.46449	1.53162	1.5854	3.33172
Cell_0110	AMPKARt2	Glucose 17 mM + Glutamine 2.500000e-01 mM + Insulin 10000 ng/ml	0.623782	0.484131	0.690445	0.597751	0.677779	0.614531	0.468907	0.653875	0.658837	0.632042	0.427013	0.514876	0.638679	0.578399	0.645583	0.70014	0.418132	0.709204	0.640869	0.602405	0.474735	0.481785	0.461837	0.462242	0.602915	0.522198	0.537884	0.714643	0.575748	0.6403	0.526557	0.553216	0.650956	0.633332	0.643756	0.561841	0.683715	0.475229	0.583473	0.573173	0.69603	0.614071	0.619661	0.65702	0.417472	0.581009	0.474471
Cell_0111	TFEB_TR	Glucose 17 mM + Glutamine 2.500000e-01 mM + Insulin 10000 ng/ml	1.60447	2.45597	1.08895	1.12894	1.4427	1.74728	1.96953	0.7368	1.18699	1.2309	1.24248	2.43136	1.19178	1.01896	2.01675	2.44836	2.01462	0.850555	0.989094	1.04021	2.34859	0.985104	1.15902	0.903375	1.07418	1.07101	0.918727	0.895196	0.937658	0.782934	2.16435	1.52411	1.43097	0.846107	1.03748	1.37968	1.14715	2.21947	1.28131	1.84779	1.08882	0.901711	0.833831	0.537694	1.32447	1.73206	3.11964
Cell_0111	FOXO_TR	Glucose 17 mM + Glutamine 2.500000e-01 mM + Insulin 10000 ng/ml	2.60275	3.28816	1.58722	1.25504	1.3479	2.36268	3.61135	1.16758	1.63206	1.12571	1.68085	2.86239	2.64778	1.4246	1.18182	2.90569	2.08564	0.996162	1.83437	1.36938	3.12257	2.46497	1.16995	1.25403	1.32947	2.25581	2.58142	2.24186	1.70509	1.38953	1.09844	2.62665	1.08821	1.4389	1.05772	1.29516	2.82414	3.29047	1.69794	1.57958	1.24752	1.40248	2.62119	1.38967	1.41517	1.55216	3.23177
Cell_0111	AMPKARt2	Glucose 17 mM + Glutamine 2.500000e-01 mM + Insulin 10000 ng/ml	0.617565	0.47355	0.68979	0.614941	0.693059	0.59769	0.473742	0.659309	0.657994	0.63897	0.404592	0.504956	0.642107	0.587754	0.654442	0.706117	0.455437	0.699668	0.624694	0.604007	0.464159	0.506021	0.4594	0.465165	0.594211	0.513021	0.522648	0.62868	0.575984	0.667467	0.546861	0.542922	0.647306	0.626283	0.640865	0.560839	0.671384	0.473005	0.585874	0.584236	0.694059	0.624039	0.623779	0.656867	0.40851	0.573523	0.507393
Cell_0112	TFEB_TR	Glucose 17 mM + Glutamine 2.500000e-01 mM + Insulin 10000 ng/ml	1.44204	2.39396	1.2382	1.15445	1.43803	1.65575	1.87721	0.739558	1.32594	1.13809	1.24847	3.03303	1.55465	0.975181	2.01151	2.23723	2.12474	0.903053	1.00618	0.898199	2.47029	1.23688	1.18539	0.944094	1.24938	1.13398	0.990801	0.786946	0.957962	0.783456	2.09766	1.77124	1.42594	1.00093	1.09054	1.38618	1.11256	2.18054	1.09269	1.40744	1.12258	0.909478	0.829459	0.48215	1.12968	1.70586	2.84262
Cell_0112	FOXO_TR	Glucose 17 mM + Glutamine 2.500000e-01 mM + Insulin 10000 ng/ml	2.82845	3.26775	1.6281	1.20025	1.30976	2.47677	3.70327	1.14366	1.57178	1.09314	1.67106	2.90721	2.70466	1.33708	1.20885	2.89224	2.21318	0.989857	1.8176	1.32038	3.20338	2.47623	1.18331	1.23396	1.30173	2.47364	2.80185	2.32554	1.67834	1.36312	1.37175	2.53732	1.05296	1.40857	1.05813	1.23393	2.88638	3.20871	1.73306	1.51052	1.24157	1.34643	2.7915	1.38401	1.34959	1.52871	3.22714
Cell_0112	AMPKARt2	Glucose 17 mM + Glutamine 2.500000e-01 mM + Insulin 10000 ng/ml	0.61941	0.475883	0.673718	0.633191	0.692736	0.608405	0.497033	0.662063	0.664137	0.638911	0.395372	0.505804	0.635951	0.586884	0.657943	0.695293	0.473401	0.709579	0.609675	0.611623	0.494108	0.522633	0.459183	0.483922	0.573889	0.497599	0.510741	0.629669	0.564733	0.673314	0.557939	0.551837	0.650364	0.617335	0.623628	0.554086	0.659165	0.467238	0.584999	0.579169	0.694986	0.622006	0.626346	0.640695	0.392904	0.574901	0.51373
Cell_0113	TFEB_TR	Glucose 17 mM + Glutamine 2.500000e-01 mM + Insulin 10000 ng/ml	1.20264	1.42868	0.994125	1.21536	1.43849	1.59783	1.89629	0.715708	1.33898	1.11593	1.22577	2.39301	1.75695	1.08603	1.97002	2.44147	2.30572	0.949577	1.07008	0.814758	2.50388	1.47167	1.16448	0.897815	1.36243	1.1147	1.01741	0.917731	0.992134	0.774295	1.90326	1.36943	0.659179	1.32549	0.994075	1.28271	1.17923	2.12738	1.2144	1.23174	1.26182	0.907439	0.82835	0.510454	1.07862	1.66959	2.9477
Cell_0113	FOXO_TR	Glucose 17 mM + Glutamine 2.500000e-01 mM + Insulin 10000 ng/ml	2.77128	1.61971	1.74939	1.19375	1.30687	2.45837	3.77938	1.13051	1.5043	1.153	1.60031	3.02847	2.68534	1.33807	1.16442	2.96797	2.51417	1.00688	1.73847	1.32232	3.27859	2.44482	1.17204	1.22377	1.25842	2.47948	2.99428	2.30536	1.65958	1.34239	1.98788	2.32704	1.75849	1.36755	1.06835	1.19891	2.87193	3.14214	1.70883	1.45505	1.27719	1.36244	2.96366	1.45098	1.31653	1.53609	3.36177
Cell_0113	AMPKARt2	Glucose 17 mM + Glutamine 2.500000e-01 mM + Insulin 10000 ng/ml	0.624274	0.527188	0.653434	0.631541	0.69063	0.619846	0.50691	0.663734	0.660007	0.646909	0.402042	0.513572	0.635646	0.580881	0.659249	0.694006	0.485953	0.713334	0.615065	0.622084	0.521203	0.508234	0.468614	0.473072	0.578456	0.504215	0.520917	0.623477	0.547842	0.661669	0.563512	0.556368	0.540118	0.611521	0.629813	0.567575	0.638429	0.47386	0.588494	0.574881	0.704062	0.620134	0.630039	0.637217	0.392436	0.580737	0.504622
Cell_0114	TFEB_TR	Glucose 17 mM + Glutamine 2.500000e-01 mM + Insulin 10000 ng/ml	1.25873	1.29651	0.894031	1.16642	1.4962	1.47937	2.06429	0.724101	1.13553	1.25497	1.23203	1.41395	1.62178	1.12441	1.79856	2.67747	2.31321	0.879628	1.13518	0.982426	2.31651	1.44582	1.15837	0.85485	1.17921	1.10369	1.07094	0.922202	1.07601	0.763665	1.4559	1.13413	0.564332	1.20893	0.938189	1.25541	1.35114	2.09239	1.40829	1.53105	1.19361	0.840759	0.825447	0.554727	1.16351	1.71173	3.09449
Cell_0114	FOXO_TR	Glucose 17 mM + Glutamine 2.500000e-01 mM + Insulin 10000 ng/ml	2.59434	1.5574	1.83855	1.199	1.62038	2.12584	3.81167	1.16902	1.49041	1.12823	1.60194	3.02405	2.60567	1.29406	1.14291	3.01416	2.62346	1.00597	1.68548	1.37971	3.06021	2.39379	1.15562	1.25771	1.22527	2.58599	3.05064	2.3347	1.65708	1.34887	2.49714	2.36863	1.7948	1.35118	1.03685	1.55569	2.95755	3.20708	1.67103	1.45844	1.21027	1.36204	2.93975	1.44043	1.29234	1.54166	3.51521
Cell_0114	AMPKARt2	Glucose 17 mM + Glutamine 2.500000e-01 mM + Insulin 10000 ng/ml	0.627442	0.518366	0.647206	0.62802	0.699813	0.595835	0.501455	0.674422	0.652316	0.660032	0.400525	0.515964	0.645065	0.590989	0.674449	0.69827	0.5144	0.713007	0.616003	0.620297	0.531114	0.492674	0.477228	0.449849	0.611994	0.501485	0.515297	0.625663	0.535168	0.666544	0.564794	0.540083	0.542729	0.619968	0.640902	0.578324	0.61268	0.492594	0.596765	0.587045	0.704291	0.625382	0.626956	0.64856	0.406416	0.581108	0.500125
Cell_0115	TFEB_TR	Glucose 17 mM + Glutamine 2.500000e-01 mM + Insulin 10000 ng/ml	1.56761	1.23944	1.05751	1.10295	1.57855	1.49304	0.592425	0.767333	1.2762	1.33475	1.24239	0.848205	1.33903	1.00218	1.79053	2.52887	2.18643	0.919494	1.14516	1.30589	2.19492	1.36257	1.16207	0.958056	0.835026	1.07763	1.18922	0.772495	1.19633	0.782373	1.24838	1.33763	0.646481	1.04819	1.03223	1.38572	1.46101	1.18745	1.40991	1.58621	1.19483	0.779581	0.836342	0.530789	1.2887	1.77044	2.89751
Cell_0115	FOXO_TR	Glucose 17 mM + Glutamine 2.500000e-01 mM + Insulin 10000 ng/ml	2.63761	1.47442	1.76932	1.19512	2.06796	2.08889	1.67367	1.26231	1.48763	1.09886	1.62373	2.89381	2.57314	1.23601	1.1917	2.93857	2.44466	1.01444	1.67159	1.42089	2.92167	2.35477	1.16569	1.29175	1.2026	2.52888	3.05544	2.39352	1.64767	1.36726	2.63747	2.50904	1.82711	1.31063	1.01605	2.09219	2.97323	1.3163	1.67361	1.44786	1.25106	1.35721	2.90891	1.3947	1.2987	1.57188	3.50117
Cell_0115	AMPKARt2	Glucose 17 mM + Glutamine 2.500000e-01 mM + Insulin 10000 ng/ml	0.627577	0.515899	0.652613	0.628772	0.693727	0.569475	0.628983	0.675632	0.656225	0.67228	0.394663	0.51058	0.649953	0.59863	0.681728	0.678672	0.537495	0.723063	0.599269	0.619218	0.531176	0.495297	0.475783	0.441522	0.630909	0.502507	0.496804	0.642327	0.532728	0.701799	0.563151	0.532104	0.561796	0.623828	0.628551	0.520469	0.593452	0.472997	0.585421	0.58876	0.712945	0.622732	0.609075	0.652951	0.406366	0.57597	0.495094
Cell_0116	TFEB_TR	Glucose 17 mM + Glutamine 2.500000e-01 mM + Insulin 10000 ng/ml	1.66603	1.35116	1.08729	1.20201	1.64336	1.64495	0.565106	0.769478	1.46967	1.29419	1.22872	1.40416	1.14759	0.975719	1.8214	2.38649	2.05213	0.931971	1.17269	1.30035	2.22745	1.2839	1.18254	1.08687	0.920341	1.11059	1.26576	0.757756	1.26952	0.793071	1.38192	1.34075	0.703164	1.16768	1.00507	1.51237	1.47653	1.18654	1.44242	1.56853	1.46699	0.830136	0.867069	0.537925	1.26265	1.71836	2.7752
Cell_0116	FOXO_TR	Glucose 17 mM + Glutamine 2.500000e-01 mM + Insulin 10000 ng/ml	2.77934	1.42841	1.62971	1.23539	2.20078	2.3819	1.56133	1.32516	1.43846	1.43233	1.5804	2.86383	2.60931	1.25259	1.11408	2.80443	2.22761	1.02966	1.65377	1.45678	3.15221	2.26764	1.17684	1.26638	1.20246	2.41556	3.05313	2.2893	1.59676	1.3601	2.58428	2.4294	1.8171	1.25894	1.01354	2.29315	2.86736	1.32427	1.68173	1.36487	1.92319	1.36873	2.97209	1.37433	1.33718	1.54187	3.32632
Cell_0116	AMPKARt2	Glucose 17 mM + Glutamine 2.500000e-01 mM + Insulin 10000 ng/ml	0.618521	0.519442	0.649686	0.623032	0.670709	0.559358	0.648768	0.655443	0.662826	0.688481	0.396185	0.512679	0.647037	0.59654	0.67514	0.657477	0.515702	0.718988	0.583757	0.629133	0.520198	0.508728	0.476401	0.450627	0.619147	0.521618	0.49254	0.648021	0.538208	0.732145	0.562282	0.542951	0.564849	0.606939	0.619558	0.44359	0.580961	0.47537	0.571032	0.585231	0.728732	0.614156	0.59838	0.657696	0.41542	0.573364	0.479957
Cell_0117	TFEB_TR	Glucose 17 mM + Glutamine 2.500000e-01 mM + Insulin 10000 ng/ml	1.5864	1.44157	1.03765	1.26442	1.67776	1.74895	0.561799	0.802426	1.15838	1.43552	1.23886	0.641467	1.27871	1.09956	1.78784	2.5916	1.97908	0.777903	1.25204	0.990513	2.23163	1.21639	1.23155	1.14288	1.2633	1.18665	1.30131	0.781221	1.29614	0.762078	1.30082	1.2014	0.627167	1.13936	0.948574	1.54239	1.42871	1.21746	1.46804	1.74591	1.5871	0.899535	0.8555	0.591934	1.09252	1.66743	3.10635
Cell_0117	FOXO_TR	Glucose 17 mM + Glutamine 2.500000e-01 mM + Insulin 10000 ng/ml	2.77256	1.43432	1.54723	1.26089	2.07971	2.5256	1.60546	1.34565	1.43242	2.06532	1.56797	1.18218	2.76467	1.26241	1.09093	2.72836	2.10765	1.02003	1.66495	1.47984	3.28639	2.20951	1.16493	1.24107	1.189	2.52553	3.03316	2.13958	1.54215	1.34644	2.53191	2.36202	1.77787	1.23733	1.03274	2.25895	2.84913	1.31871	1.63787	1.30657	2.8706	1.3472	1.19464	1.30979	1.36288	1.60928	3.2078
Cell_0117	AMPKARt2	Glucose 17 mM + Glutamine 2.500000e-01 mM + Insulin 10000 ng/ml	0.60686	0.523117	0.641174	0.626732	0.658121	0.54562	0.647873	0.638403	0.670648	0.700404	0.392667	0.542294	0.633111	0.597069	0.690472	0.661065	0.466906	0.711412	0.584943	0.627517	0.501902	0.520292	0.48301	0.457201	0.611466	0.515643	0.492493	0.634853	0.545121	0.73984	0.558198	0.54071	0.562868	0.597994	0.629007	0.44788	0.56705	0.501908	0.579882	0.590256	0.704926	0.621192	0.581228	0.6633	0.449457	0.594001	0.474818
Cell_0118	TFEB_TR	Glucose 17 mM + Glutamine 2.500000e-01 mM + Insulin 10000 ng/ml	1.58534	1.26877	1.07316	1.18709	1.66825	1.81392	0.583379	0.94177	0.824318	1.72647	1.27942	0.643694	1.5286	1.06722	2.07446	2.83886	2.07328	0.825639	1.32531	0.962944	2.26832	1.18771	1.25511	1.26945	1.14357	1.18657	1.34896	0.81014	1.33248	0.757026	1.20568	1.3072	0.625287	0.956413	1.05153	1.55806	1.4751	1.14574	1.29922	1.56771	1.46606	0.851481	0.901679	0.614475	1.09064	1.72185	3.43544
Cell_0118	FOXO_TR	Glucose 17 mM + Glutamine 2.500000e-01 mM + Insulin 10000 ng/ml	2.57076	1.44202	1.50594	1.21068	2.0201	2.53842	1.71444	1.38801	1.48708	2.42343	1.61593	1.15706	2.96656	1.2376	1.64878	2.73119	2.09658	1.04502	1.68345	1.396	3.17301	2.28935	1.16259	1.23943	1.13712	2.59012	2.98193	2.13707	1.50977	1.35129	2.60432	2.42258	1.78674	1.2118	1.05081	2.31145	2.86871	1.30649	1.52481	1.34419	3.25138	1.30259	1.44657	1.2597	1.34237	2.11176	3.19733
Cell_0118	AMPKARt2	Glucose 17 mM + Glutamine 2.500000e-01 mM + Insulin 10000 ng/ml	0.608567	0.525848	0.644613	0.645017	0.66372	0.526423	0.636459	0.635155	0.680018	0.698741	0.385453	0.548358	0.592414	0.590705	0.704156	0.649627	0.450732	0.724222	0.59582	0.617537	0.495079	0.517965	0.474996	0.44764	0.620773	0.489092	0.495288	0.629601	0.550565	0.756621	0.553534	0.531132	0.575154	0.612327	0.634855	0.508911	0.546624	0.512913	0.582852	0.585593	0.662104	0.62963	0.645186	0.644403	0.467802	0.60514	0.483057
Cell_0119	TFEB_TR	Glucose 17 mM + Glutamine 2.500000e-01 mM + Insulin 10000 ng/ml	1.4815	1.10959	1.08758	1.19994	1.61033	1.87375	0.627029	1.09141	0.920814	1.67366	1.3055	0.645061	1.7083	0.918001	2.43738	2.77735	1.53107	1.01038	1.3582	1.13821	2.37203	1.18669	1.26717	1.35177	0.845601	1.12804	1.36178	0.930377	1.34144	0.796949	1.40322	1.39333	0.730383	0.915379	1.0578	1.64505	1.66301	1.0479	1.23472	1.12169	1.45453	0.781285	0.95054	0.65062	1.22767	1.77231	3.22291
Cell_0119	FOXO_TR	Glucose 17 mM + Glutamine 2.500000e-01 mM + Insulin 10000 ng/ml	2.26916	1.44931	1.44916	1.18061	2.03492	2.54509	1.77285	1.41179	1.50015	2.2539	1.63228	1.14007	2.94448	1.19645	2.4923	2.71773	1.18529	1.11717	1.64472	1.47172	3.28756	2.39203	1.17951	1.20849	1.09769	2.46823	2.93045	2.19384	1.45096	1.3306	2.76049	2.36514	1.84723	1.17803	1.01602	2.39631	2.90681	1.30731	1.39266	1.35066	3.16388	1.26301	1.54353	1.30013	1.27152	2.70903	3.17694
Cell_0119	AMPKARt2	Glucose 17 mM + Glutamine 2.500000e-01 mM + Insulin 10000 ng/ml	0.615636	0.529479	0.647452	0.649258	0.67838	0.523358	0.639212	0.624644	0.676942	0.687086	0.387743	0.546079	0.541423	0.590745	0.663366	0.610619	0.641916	0.718895	0.599971	0.623716	0.499884	0.516614	0.466789	0.450795	0.625399	0.489429	0.511599	0.641211	0.547021	0.787066	0.555097	0.535528	0.567031	0.619024	0.640715	0.555897	0.532795	0.507038	0.569682	0.570924	0.663984	0.610232	0.635335	0.608524	0.46404	0.550178	0.4843
Cell_0120	TFEB_TR	Glucose 17 mM + Glutamine 2.500000e-01 mM + Insulin 10000 ng/ml	1.26391	1.34063	1.10297	1.25354	1.59058	1.88449	0.661054	1.1996	1.07416	1.28544	1.31501	0.646341	1.87331	0.972636	2.42971	2.54081	1.35332	0.997532	1.36626	1.20812	2.34704	1.24943	1.29782	1.2275	0.967211	1.09919	1.37945	0.93474	1.31	0.799697	1.47942	1.28206	0.756773	0.941619	0.95004	1.71153	1.60485	1.11165	1.39104	1.05589	1.52295	0.847344	0.961337	0.718875	1.16865	1.84351	2.93652
Cell_0120	FOXO_TR	Glucose 17 mM + Glutamine 2.500000e-01 mM + Insulin 10000 ng/ml	2.10428	1.49709	1.3961	1.20085	2.07722	2.53577	1.77271	1.37782	1.5041	1.93541	1.62343	1.12577	2.68212	1.11642	2.84083	2.61194	1.13691	1.11638	1.59527	2.06628	3.59103	2.40186	1.17533	1.17446	1.07035	2.41426	2.94674	2.23232	1.39667	1.3328	2.80974	2.28529	1.87727	1.1718	1.01725	2.42475	3.06264	1.30226	1.30346	1.29653	3.1789	1.22972	1.41041	1.30401	1.21069	2.86642	3.1899
Cell_0120	AMPKARt2	Glucose 17 mM + Glutamine 2.500000e-01 mM + Insulin 10000 ng/ml	0.609712	0.533906	0.636201	0.639622	0.688018	0.531967	0.650139	0.603496	0.668992	0.669716	0.388921	0.532097	0.522201	0.616779	0.615229	0.600048	0.624425	0.683945	0.593691	0.625737	0.499252	0.533372	0.500895	0.471842	0.63652	0.498045	0.526051	0.650597	0.533861	0.798327	0.554886	0.528136	0.547268	0.611661	0.651576	0.574997	0.541941	0.512011	0.569428	0.562808	0.687242	0.585865	0.599188	0.587009	0.472666	0.484262	0.482327
Cell_0121	TFEB_TR	Glucose 17 mM + Glutamine 2.500000e-01 mM + Insulin 10000 ng/ml	1.21726	1.65845	1.13862	1.19916	1.66995	1.85897	0.647644	1.3029	1.05217	1.08198	1.31652	0.635149	1.79963	1.07684	2.30406	2.41501	1.3304	1.04235	1.39601	1.37898	2.21425	0.675791	1.29618	1.17063	1.22233	1.16565	1.44219	0.8196	1.29019	0.804062	1.51993	1.1671	0.718072	0.97242	0.934201	1.68866	1.35385	1.20184	1.44481	1.14783	1.46227	0.921936	0.958515	0.766227	1.07644	1.98555	3.21293
Cell_0121	FOXO_TR	Glucose 17 mM + Glutamine 2.500000e-01 mM + Insulin 10000 ng/ml	2.07292	1.58446	1.36882	1.18089	2.16897	2.54698	1.71685	1.37787	1.56153	1.83114	1.61753	1.08757	2.44169	1.0752	2.7685	2.45101	1.15006	1.03206	1.58725	2.80643	3.6031	1.32829	1.15782	1.1611	1.05997	2.44553	2.97548	2.25467	1.36801	1.45231	2.78471	2.3615	1.86555	1.15226	1.08855	2.5077	3.12217	1.29685	1.25367	1.32785	3.27987	1.2214	1.20714	1.23402	1.2165	2.78096	3.31147
Cell_0121	AMPKARt2	Glucose 17 mM + Glutamine 2.500000e-01 mM + Insulin 10000 ng/ml	0.60317	0.536875	0.632958	0.636507	0.686252	0.523707	0.651208	0.595016	0.672395	0.660616	0.384128	0.54037	0.533966	0.633537	0.621237	0.616023	0.63953	0.666049	0.591187	0.611126	0.492748	0.626429	0.541586	0.466848	0.670771	0.485043	0.52739	0.64401	0.529356	0.790329	0.553724	0.515647	0.556058	0.62176	0.647728	0.564925	0.557869	0.512237	0.574037	0.569131	0.682181	0.584544	0.585992	0.585147	0.491109	0.48615	0.47961
Cell_0122	TFEB_TR	Glucose 17 mM + Glutamine 2.500000e-01 mM + Insulin 10000 ng/ml	1.24464	1.60222	1.0939	1.21547	1.74431	1.80264	0.635004	1.38535	1.05506	1.18636	1.30074	0.621514	1.54892	0.987244	2.28587	2.45393	1.27589	1.12395	1.43122	1.42032	2.18788	0.681019	1.31467	1.25237	1.20882	1.26617	1.42482	0.844755	1.24244	0.900374	1.82683	1.10277	0.727525	0.962681	0.865483	1.67734	1.47526	1.18694	1.42956	0.995999	1.4121	0.813135	0.993439	0.843232	1.21526	2.02459	3.72327
Cell_0122	FOXO_TR	Glucose 17 mM + Glutamine 2.500000e-01 mM + Insulin 10000 ng/ml	1.90909	1.65482	1.3331	1.14612	2.2198	2.46791	1.66191	1.42439	1.59236	1.90007	1.5785	1.04913	2.31005	1.11981	2.74677	2.34478	1.15819	0.977905	1.59371	3.14803	3.46534	1.32185	1.16034	1.12674	1.24391	2.40677	2.91052	2.22193	1.27689	1.5904	2.80821	2.38341	1.85649	1.10027	1.09555	2.66112	3.00039	1.33946	1.22431	1.37279	3.32309	1.21582	1.12119	1.22938	1.21324	2.77665	3.47224
Cell_0122	AMPKARt2	Glucose 17 mM + Glutamine 2.500000e-01 mM + Insulin 10000 ng/ml	0.605214	0.530215	0.644174	0.636514	0.68346	0.511319	0.647593	0.600974	0.681803	0.667139	0.38554	0.570434	0.547014	0.625831	0.641781	0.604778	0.637082	0.669032	0.600437	0.615257	0.485404	0.614452	0.513427	0.44093	0.666137	0.477031	0.530114	0.62893	0.540423	0.792389	0.560097	0.533362	0.567658	0.639628	0.644599	0.545399	0.559934	0.507042	0.570822	0.585181	0.668021	0.587533	0.579715	0.582375	0.498354	0.519343	0.461786
Cell_0123	TFEB_TR	Glucose 17 mM + Glutamine 2.500000e-01 mM + Insulin 10000 ng/ml	1.24096	1.43693	1.05613	1.28769	1.73677	1.73732	0.684105	1.46228	1.07342	1.37506	1.28633	0.63233	1.62387	0.930539	2.31101	2.45794	1.14683	0.877133	1.41529	1.02244	2.24959	0.699752	1.41276	1.225	1.09295	1.263	0.464101	0.975783	1.17972	0.97094	1.91276	1.19157	0.756212	0.865817	0.782427	1.65769	1.65703	1.22976	1.4979	1.08288	1.57093	0.717465	1.03993	0.949384	1.28187	2.04568	3.93624
Cell_0123	FOXO_TR	Glucose 17 mM + Glutamine 2.500000e-01 mM + Insulin 10000 ng/ml	1.74709	1.7029	1.28569	1.16048	2.20744	2.30632	1.67005	1.39775	1.55036	2.03067	1.54243	1.0553	2.21871	1.14186	2.78826	2.30788	1.13721	0.970181	1.58878	3.17259	3.59771	1.27943	1.14565	1.08202	1.63692	2.36332	1.20833	2.22143	1.20627	1.74766	2.81833	2.29805	1.83212	1.10733	1.06835	2.71304	2.94638	1.39703	1.22305	1.30041	3.42654	1.18947	1.11673	1.26483	1.18441	2.91755	3.58544
Cell_0123	AMPKARt2	Glucose 17 mM + Glutamine 2.500000e-01 mM + Insulin 10000 ng/ml	0.593613	0.52332	0.644173	0.640709	0.684294	0.521004	0.638629	0.596786	0.694351	0.668201	0.387357	0.571447	0.559609	0.628481	0.639551	0.586526	0.614057	0.662511	0.611197	0.634829	0.481295	0.609356	0.446335	0.437244	0.57931	0.480125	0.618482	0.61894	0.54985	0.809275	0.554996	0.544165	0.563235	0.632307	0.656407	0.55053	0.555879	0.517434	0.578804	0.589619	0.664024	0.587803	0.571392	0.565397	0.500691	0.539884	0.452254
Cell_0124	TFEB_TR	Glucose 17 mM + Glutamine 2.500000e-01 mM + Insulin 10000 ng/ml	1.34367	1.60585	1.1463	1.23945	1.72561	1.70384	0.737002	1.55181	1.04371	1.4954	1.29408	0.649755	1.89316	1.04115	2.25929	2.23974	1.17518	0.706954	1.43274	0.73475	2.29019	0.709704	1.46188	1.20618	1.25104	1.23192	0.451179	1.05029	1.22168	0.929607	1.81565	1.43355	0.800677	0.893636	0.916101	1.65782	1.40934	1.30582	1.53084	1.60656	1.73157	0.835426	1.0623	0.960758	1.17526	2.28546	3.80192
Cell_0124	FOXO_TR	Glucose 17 mM + Glutamine 2.500000e-01 mM + Insulin 10000 ng/ml	1.87483	1.82376	1.27672	1.15091	2.23903	2.24008	1.68146	1.29612	1.50909	2.20563	1.56096	1.07433	2.13362	1.1006	2.80875	2.25297	1.15876	0.958192	1.55828	3.10598	3.78343	1.28355	1.08844	1.06374	1.87628	2.42657	1.17888	2.29555	1.2806	2.11169	2.81496	2.31838	1.80551	1.18362	1.05902	2.65595	2.94299	1.41187	1.23134	1.26524	3.49897	1.18307	1.10658	1.21802	1.21395	3.20603	3.60793
Cell_0124	AMPKARt2	Glucose 17 mM + Glutamine 2.500000e-01 mM + Insulin 10000 ng/ml	0.579545	0.545004	0.63536	0.64759	0.682407	0.524628	0.620386	0.584438	0.702831	0.658314	0.383111	0.548322	0.576697	0.638037	0.637208	0.596398	0.615617	0.642847	0.615649	0.633785	0.48589	0.604496	0.425296	0.455358	0.499647	0.473259	0.624725	0.601787	0.546188	0.81592	0.537495	0.521428	0.569395	0.620218	0.653797	0.561744	0.558214	0.535519	0.590638	0.584239	0.655043	0.59829	0.570619	0.552206	0.508808	0.550318	0.478351
Cell_0125	TFEB_TR	Glucose 17 mM + Glutamine 2.500000e-01 mM + Insulin 10000 ng/ml	0.562559	1.91229	1.27399	1.25762	1.7753	1.68103	0.741595	1.56259	1.0823	1.43757	1.30676	0.652205	1.86673	1.1397	2.20063	2.16977	1.27392	0.968423	1.53254	0.795898	2.39699	0.729654	1.45335	1.33429	1.62867	1.25694	0.446516	1.04601	1.2962	0.930032	2.10942	0.565951	0.865884	0.988904	1.06454	1.82577	1.32814	1.21996	1.6309	1.85296	1.59657	0.908006	1.07328	0.920432	1.24306	2.46194	3.61475
Cell_0125	FOXO_TR	Glucose 17 mM + Glutamine 2.500000e-01 mM + Insulin 10000 ng/ml	1.33219	2.0088	1.30151	1.16916	2.30548	2.22073	1.69975	1.23996	1.47073	2.31379	1.58666	1.07456	2.00695	1.08057	2.83495	2.26186	1.19795	0.925742	1.53766	3.08039	3.71553	1.34774	1.03943	1.07129	1.81843	2.48377	1.1898	2.27707	1.33616	2.49102	2.85884	1.24598	1.83905	1.20519	1.01828	2.68877	2.90572	1.41448	1.22459	1.29449	3.39475	1.19604	1.09984	1.15677	1.22982	3.31964	3.56935
Cell_0125	AMPKARt2	Glucose 17 mM + Glutamine 2.500000e-01 mM + Insulin 10000 ng/ml	0.473947	0.573084	0.64032	0.641913	0.677793	0.507319	0.618835	0.584185	0.692649	0.653828	0.38365	0.541004	0.580461	0.634791	0.641378	0.599111	0.630151	0.623961	0.614955	0.612316	0.484488	0.605856	0.443597	0.473735	0.495391	0.467208	0.62734	0.57215	0.540301	0.79888	0.542914	0.524081	0.570821	0.62268	0.647279	0.556962	0.577509	0.55226	0.585983	0.583832	0.647045	0.605254	0.57638	0.550574	0.521361	0.535378	0.496709
Cell_0126	TFEB_TR	Glucose 17 mM + Glutamine 2.500000e-01 mM + Insulin 10000 ng/ml	0.55141	2.05892	1.27573	1.42432	1.82722	1.71016	0.770177	1.53453	1.09285	1.33345	1.30412	0.661357	1.63352	1.17719	2.367	2.5547	1.14411	1.20741	1.53974	0.817579	2.58345	0.771653	1.5339	1.37248	1.68124	1.24652	0.461409	1.05475	1.27041	1.02961	2.29927	0.538732	0.857972	0.885023	1.13566	1.89592	1.53296	1.13747	1.86672	1.67227	1.40507	0.793308	1.08486	0.975282	1.41063	2.33787	3.70698
Cell_0126	FOXO_TR	Glucose 17 mM + Glutamine 2.500000e-01 mM + Insulin 10000 ng/ml	1.31426	2.11067	1.29094	1.52589	2.33404	2.24911	1.83473	1.26683	1.34352	2.26985	1.58967	1.08149	1.85164	1.13464	2.86693	2.3975	1.17637	0.898976	1.55263	3.22857	3.62616	1.346	1.01933	1.08186	1.74636	2.40866	1.22732	2.17282	1.29367	2.57528	2.88628	1.25457	1.85731	1.15704	1.2113	2.78785	2.98688	1.43895	1.21404	1.23883	3.28408	1.19445	1.10192	1.16552	1.22862	3.09619	3.52597
Cell_0126	AMPKARt2	Glucose 17 mM + Glutamine 2.500000e-01 mM + Insulin 10000 ng/ml	0.475138	0.549515	0.647983	0.639657	0.675909	0.507566	0.642879	0.581639	0.687637	0.649248	0.384124	0.541571	0.563366	0.637359	0.642256	0.58204	0.639026	0.618183	0.609063	0.585812	0.472138	0.616655	0.441824	0.476461	0.513886	0.46606	0.626998	0.569226	0.545857	0.776303	0.55322	0.539514	0.547529	0.617692	0.650597	0.551929	0.609804	0.548287	0.57956	0.577167	0.650254	0.601811	0.577394	0.539135	0.532481	0.515338	0.476751
Cell_0127	TFEB_TR	Glucose 17 mM + Glutamine 2.500000e-01 mM + Insulin 10000 ng/ml	0.5585	2.14592	1.1268	1.52575	1.79956	0.623142	0.846889	1.62477	1.056	1.4523	1.29665	0.689136	1.49059	1.16525	2.39136	2.74478	0.974399	1.2831	1.45002	0.823618	2.70407	0.767075	1.61365	1.24999	1.35272	1.23456	0.475669	1.16076	1.24773	1.13196	1.9925	0.536195	0.833008	0.815186	1.29465	1.70605	1.44384	1.20565	1.93099	1.4499	1.47087	0.735419	1.08473	1.05388	1.38834	2.23089	3.74789
Cell_0127	FOXO_TR	Glucose 17 mM + Glutamine 2.500000e-01 mM + Insulin 10000 ng/ml	1.30419	2.10166	1.24773	2.22921	2.33466	1.11261	1.97999	1.32216	1.29985	2.22971	1.60171	1.10631	1.76179	1.19242	2.91399	2.39129	1.15063	0.926697	1.5188	3.36772	3.59382	1.27991	1.00201	1.06352	1.77647	2.35448	1.25286	2.14455	1.31144	2.56586	2.88877	1.25187	1.76641	1.13985	1.76494	2.79141	2.99348	1.47491	1.20291	1.34922	3.26553	1.18693	1.09546	1.16451	1.28638	2.95585	3.47499
Cell_0127	AMPKARt2	Glucose 17 mM + Glutamine 2.500000e-01 mM + Insulin 10000 ng/ml	0.480674	0.495196	0.644606	0.655827	0.678424	0.548573	0.647756	0.563812	0.707781	0.642719	0.373726	0.537282	0.547024	0.649415	0.639342	0.577717	0.652004	0.621689	0.604279	0.578066	0.474046	0.617881	0.421304	0.457295	0.529821	0.464477	0.630466	0.59305	0.554273	0.771115	0.53167	0.539572	0.533769	0.613888	0.615338	0.546088	0.570476	0.490883	0.580127	0.580968	0.645781	0.602245	0.573123	0.527005	0.53006	0.528767	0.467011
Cell_0128	TFEB_TR	Glucose 17 mM + Glutamine 2.500000e-01 mM + Insulin 10000 ng/ml	0.56136	2.17738	1.03109	1.58328	1.75581	0.647061	0.897144	1.70022	1.22029	1.61007	1.31836	0.728468	1.50731	1.03677	2.32812	2.49827	1.13883	1.38687	1.48688	0.857568	2.79309	0.691768	1.60219	1.19923	1.15447	1.24487	0.481311	1.23636	1.30171	1.21695	1.81559	0.532012	0.951935	0.916096	1.31274	1.70139	1.42346	1.22024	1.82083	1.18969	1.56316	0.761861	1.07333	1.01984	1.26046	2.27041	3.49791
Cell_0128	FOXO_TR	Glucose 17 mM + Glutamine 2.500000e-01 mM + Insulin 10000 ng/ml	1.29099	2.0235	1.25783	2.73801	2.31958	1.12826	1.95398	1.34867	1.68795	2.30427	1.63435	1.14914	1.74123	1.13284	2.94986	2.19977	1.18952	0.96589	1.49289	3.31276	3.399	1.30096	0.975549	1.03602	1.82098	2.48212	1.27847	2.13672	1.36105	2.61207	2.9439	1.23511	1.67734	1.15763	2.13637	2.76267	2.98959	1.51461	1.18933	1.9042	3.21904	1.17377	1.0965	1.12213	1.22325	2.99369	3.45436
Cell_0128	AMPKARt2	Glucose 17 mM + Glutamine 2.500000e-01 mM + Insulin 10000 ng/ml	0.488487	0.476679	0.649945	0.668808	0.67801	0.565207	0.608198	0.559746	0.70875	0.647549	0.371235	0.545102	0.543788	0.652633	0.631727	0.577326	0.655879	0.625881	0.608329	0.600071	0.488164	0.608431	0.415197	0.443746	0.562018	0.479886	0.636866	0.587118	0.552604	0.784483	0.519487	0.540574	0.540028	0.62532	0.554345	0.541282	0.568831	0.416063	0.57493	0.617507	0.628508	0.600877	0.581825	0.534809	0.524191	0.536242	0.477361
Cell_0129	TFEB_TR	Glucose 17 mM + Glutamine 2.500000e-01 mM + Insulin 10000 ng/ml	0.560899	2.12211	1.11425	1.64536	1.82198	0.63764	0.937614	1.59548	1.36104	1.54415	0.618494	0.761395	1.67804	0.904863	2.83154	2.53667	1.39519	1.3279	1.56433	0.80315	2.888	0.660987	1.68942	1.29395	1.18602	1.21526	0.486323	1.27815	1.31737	1.24881	1.8719	0.525943	1.14864	0.897469	1.09015	1.88685	1.45973	1.25716	1.83393	1.2665	1.56338	0.597798	1.08842	0.940143	1.15151	2.33085	3.69839
Cell_0129	FOXO_TR	Glucose 17 mM + Glutamine 2.500000e-01 mM + Insulin 10000 ng/ml	1.28161	1.86312	1.31347	2.74036	2.29623	1.11124	1.86672	1.31995	2.29933	2.3382	1.35672	1.19038	1.73315	1.0881	2.96401	2.17419	1.24903	0.935817	1.5756	3.24873	3.19354	1.40298	0.939631	1.03538	1.91141	2.61517	1.30694	2.06333	1.33558	2.50119	3.04144	1.21729	1.66144	1.16025	2.07936	2.78113	2.97811	1.54009	1.18817	2.5754	3.15609	1.20787	1.11648	1.11903	1.26967	2.92898	3.48311
Cell_0129	AMPKARt2	Glucose 17 mM + Glutamine 2.500000e-01 mM + Insulin 10000 ng/ml	0.492392	0.485493	0.667718	0.677569	0.667559	0.554948	0.564598	0.580013	0.673892	0.648169	0.628744	0.561114	0.542142	0.648301	0.633116	0.561669	0.645462	0.636775	0.611879	0.610549	0.493934	0.610461	0.417168	0.463452	0.58657	0.49296	0.63826	0.563194	0.550977	0.791649	0.536023	0.543046	0.539736	0.625897	0.531245	0.549366	0.5929	0.378105	0.570217	0.645932	0.620251	0.511523	0.595539	0.543862	0.538066	0.510135	0.469067
Cell_0130	TFEB_TR	Glucose 17 mM + Glutamine 2.500000e-01 mM + Insulin 10000 ng/ml	0.573693	2.25043	1.16168	1.59718	1.91512	0.626875	1.03484	1.51178	1.13834	1.56812	0.64723	0.747307	1.849	0.96767	2.82226	2.80593	1.30732	1.14506	1.49245	0.94004	2.80164	0.711604	1.84542	1.36981	1.28267	1.26012	0.467331	1.44782	1.27988	1.24324	1.78914	0.533229	1.26513	0.861305	0.980272	1.8318	1.5221	1.46747	1.9024	1.79487	1.6413	0.614381	1.144	0.917297	1.1509	2.44668	4.29064
Cell_0130	FOXO_TR	Glucose 17 mM + Glutamine 2.500000e-01 mM + Insulin 10000 ng/ml	1.29961	1.7131	1.31893	2.56684	2.30372	1.10291	1.84289	1.27334	2.57469	2.30406	1.50606	1.1796	1.72358	1.36274	2.98913	2.31276	1.32011	0.907445	1.54123	3.23559	3.16259	1.46	0.912546	1.04103	2.0132	2.55297	1.29265	1.99645	1.3023	2.3934	3.13544	1.20517	1.59672	1.13998	2.03594	2.79558	2.94498	1.50425	1.18588	2.94363	3.16581	1.2058	1.12137	1.15697	2.03563	2.8543	3.44484
Cell_0130	AMPKARt2	Glucose 17 mM + Glutamine 2.500000e-01 mM + Insulin 10000 ng/ml	0.494109	0.477509	0.672358	0.689918	0.655229	0.545792	0.546951	0.597518	0.659838	0.632899	0.629072	0.558279	0.552925	0.630499	0.648356	0.547689	0.654386	0.648437	0.613746	0.592507	0.502641	0.627604	0.413961	0.491854	0.593025	0.476005	0.638209	0.574405	0.556695	0.774136	0.528677	0.538393	0.531725	0.623215	0.524958	0.548357	0.602326	0.349901	0.574824	0.643189	0.623981	0.526263	0.584483	0.545167	0.533311	0.499321	0.472637
Cell_0131	TFEB_TR	Glucose 17 mM + Glutamine 2.500000e-01 mM + Insulin 10000 ng/ml	0.581622	2.50571	1.02352	1.51622	1.89769	0.636216	1.15453	1.54201	0.88683	1.8136	0.78159	0.711992	1.75258	1.14083	2.03977	0.665527	1.07006	1.11578	1.46571	1.25668	2.54819	0.700944	1.80501	1.38372	1.37802	1.34402	0.436288	1.46867	1.29135	1.35744	1.56443	0.527638	1.28776	0.997229	1.0565	1.72485	1.51261	1.50298	1.84456	1.79584	1.61088	0.620664	1.212	0.922943	1.36937	2.49682	0.591998
Cell_0131	FOXO_TR	Glucose 17 mM + Glutamine 2.500000e-01 mM + Insulin 10000 ng/ml	1.31706	1.66694	1.29394	2.54321	2.32112	1.12088	1.80798	1.25812	2.51725	2.36312	1.50043	1.14946	1.70424	1.82793	3.03345	1.68895	1.40473	0.951163	1.48556	3.19587	3.10543	1.48613	0.89865	1.05229	2.03975	2.41737	1.25014	1.94827	1.29808	2.62222	3.22562	1.20167	1.48915	1.10178	2.13832	2.81223	2.95626	1.39572	1.16803	2.97499	3.18645	1.23083	1.09068	1.18103	3.02066	2.87628	1.17427
Cell_0131	AMPKARt2	Glucose 17 mM + Glutamine 2.500000e-01 mM + Insulin 10000 ng/ml	0.494193	0.459725	0.660635	0.682918	0.648198	0.558458	0.530734	0.607802	0.677588	0.625461	0.604708	0.535958	0.595517	0.586203	0.648764	0.690376	0.679501	0.651276	0.628676	0.580914	0.519368	0.642728	0.41965	0.490874	0.593696	0.470729	0.640222	0.590314	0.561094	0.760498	0.504102	0.549469	0.525731	0.639923	0.516354	0.540347	0.588664	0.31523	0.579857	0.63298	0.625117	0.542088	0.562011	0.556791	0.468239	0.517109	0.719018
Cell_0132	TFEB_TR	Glucose 17 mM + Glutamine 2.500000e-01 mM + Insulin 10000 ng/ml	0.5812	2.43191	0.921038	1.50414	1.87436	0.638539	1.25076	1.47799	0.895355	1.79884	0.788513	0.744008	1.46656	1.19731	2.8914	0.647281	1.08009	1.08985	1.57902	1.34834	2.36048	0.658638	1.6652	1.42207	1.35852	1.2866	0.438545	1.21422	1.326	1.50449	1.40651	0.505773	1.28593	1.05272	1.10232	1.76693	1.46338	1.41757	1.75068	1.21327	1.3979	0.601616	1.30587	0.921448	1.54308	2.4089	0.633501
Cell_0132	FOXO_TR	Glucose 17 mM + Glutamine 2.500000e-01 mM + Insulin 10000 ng/ml	1.29952	1.63994	1.30744	2.63849	2.29382	1.12537	1.75387	1.25333	2.42541	2.3995	1.43533	1.16749	1.68083	2.02708	3.14008	1.70984	1.40016	0.971431	1.99442	3.24333	2.9691	1.52333	0.872174	1.05578	2.0988	2.36872	1.2238	1.87295	1.31331	2.90805	3.29781	1.24373	1.47271	1.08406	2.14466	2.82508	2.94739	1.30258	1.15865	2.80215	3.14701	1.21863	1.05963	1.19851	3.26209	2.89138	1.16126
Cell_0132	AMPKARt2	Glucose 17 mM + Glutamine 2.500000e-01 mM + Insulin 10000 ng/ml	0.491647	0.459498	0.652012	0.658992	0.635576	0.571881	0.509461	0.622304	0.680749	0.625627	0.595966	0.516613	0.629885	0.537444	0.633152	0.685495	0.676513	0.659044	0.641403	0.581856	0.527508	0.634461	0.436779	0.483286	0.578828	0.487915	0.636317	0.571943	0.560848	0.776536	0.508068	0.56826	0.526618	0.641726	0.542102	0.56133	0.590011	0.307796	0.583947	0.621078	0.623937	0.54008	0.547951	0.575303	0.403197	0.522953	0.714177
Cell_0133	TFEB_TR	Glucose 17 mM + Glutamine 2.500000e-01 mM + Insulin 10000 ng/ml	0.602103	2.10094	1.04748	1.52361	1.92805	0.63043	1.33136	1.33317	1.0113	1.56497	0.657646	0.81561	1.41135	1.13605	4.43944	0.64604	1.26624	1.01439	1.64165	1.29482	1.03735	0.733745	1.64009	1.37926	1.35706	1.23902	0.446559	1.22499	1.27969	1.48951	1.61479	0.504974	1.32486	0.990683	1.02968	1.6803	1.49835	1.72246	1.69179	1.11061	1.37035	0.57894	1.41978	0.920107	1.38573	2.43467	0.615982
Cell_0133	FOXO_TR	Glucose 17 mM + Glutamine 2.500000e-01 mM + Insulin 10000 ng/ml	1.29954	1.58159	1.31964	2.77995	2.27144	1.11445	1.71027	1.24347	2.34472	2.28635	1.40834	1.1778	1.65796	1.92355	3.25973	1.753	1.29462	0.918588	2.86141	3.3008	1.55137	1.49728	0.856227	1.04454	2.23298	2.36938	1.2042	1.80369	1.30777	2.92173	3.29644	1.31052	1.49843	1.08293	2.10107	2.77073	2.82881	1.30325	1.15909	2.68416	3.13683	1.15583	1.04539	1.21454	3.0916	2.93472	1.13008
Cell_0133	AMPKARt2	Glucose 17 mM + Glutamine 2.500000e-01 mM + Insulin 10000 ng/ml	0.496006	0.479955	0.662268	0.651023	0.613144	0.572388	0.508872	0.630627	0.670833	0.615446	0.622113	0.51121	0.617592	0.506745	0.63392	0.68456	0.657728	0.671116	0.630055	0.58484	0.535973	0.592678	0.448801	0.510529	0.556925	0.482378	0.629567	0.557327	0.553227	0.786506	0.522123	0.5623	0.539123	0.611971	0.574032	0.588147	0.607236	0.316095	0.585016	0.61673	0.625678	0.540337	0.527551	0.584233	0.398682	0.506251	0.702049
Cell_0134	TFEB_TR	Glucose 17 mM + Glutamine 2.500000e-01 mM + Insulin 10000 ng/ml	0.633279	1.98948	1.21217	1.58742	1.92651	0.63241	1.40889	1.29169	1.12985	1.66619	0.635481	0.850196	1.63469	1.09385	3.52782	0.646887	1.33921	1.07899	1.72687	1.2452	1.07484	0.78435	1.63339	1.25683	1.65093	1.31025	0.431175	1.49937	1.21411	1.50676	1.87336	0.520868	1.34763	1.01077	0.96918	1.58406	1.64169	2.02209	1.6185	1.62555	1.51209	0.570393	1.4716	0.893669	1.23322	2.51791	0.59668
Cell_0134	FOXO_TR	Glucose 17 mM + Glutamine 2.500000e-01 mM + Insulin 10000 ng/ml	1.3449	1.54477	1.32575	2.9235	2.30049	1.11449	1.65877	1.22835	2.35696	2.26312	1.42071	1.14838	1.6259	1.85304	3.27719	1.78989	1.22366	0.881155	3.33494	3.18752	1.63968	1.40049	0.870605	1.21867	2.27177	2.39547	1.22762	1.762	1.19508	2.90209	3.21043	1.29339	1.50148	1.05428	2.16472	2.71471	2.76129	1.33192	1.1561	2.85178	3.20908	1.10851	1.02227	1.20212	3.10217	2.96308	1.12964
Cell_0134	AMPKARt2	Glucose 17 mM + Glutamine 2.500000e-01 mM + Insulin 10000 ng/ml	0.503207	0.510828	0.685055	0.656923	0.597744	0.559486	0.516644	0.628881	0.673134	0.607931	0.632978	0.512234	0.601499	0.490557	0.643989	0.689563	0.660192	0.675279	0.609701	0.591373	0.55049	0.546248	0.45174	0.531135	0.546049	0.476401	0.62627	0.563358	0.552121	0.779253	0.522137	0.564572	0.54891	0.590638	0.565233	0.579528	0.609515	0.313649	0.57972	0.624128	0.627222	0.554104	0.511511	0.586758	0.421929	0.493011	0.702988
Cell_0135	TFEB_TR	Glucose 17 mM + Glutamine 2.500000e-01 mM + Insulin 10000 ng/ml	0.64213	2.10425	1.22043	1.65453	1.85517	0.640706	1.49474	1.32064	1.15774	1.88888	0.679069	0.915469	1.70138	1.10592	2.19078	0.668084	1.19376	1.0757	1.91561	1.18715	1.02333	0.70752	1.5769	1.29721	2.07194	1.16094	0.43571	1.47933	1.28682	1.64024	1.67633	0.528333	1.24321	1.09646	1.04647	1.68606	1.7015	1.76073	1.56924	2.13545	1.5426	0.559535	1.48412	0.830994	1.40355	2.43059	0.612519
Cell_0135	FOXO_TR	Glucose 17 mM + Glutamine 2.500000e-01 mM + Insulin 10000 ng/ml	1.3654	1.52203	1.34262	2.96835	2.27736	1.12033	1.65231	1.15048	2.50654	2.36738	1.44106	1.18182	1.62285	1.92413	3.28686	1.80287	1.21053	0.895459	3.48642	3.07695	1.65336	1.32986	0.864355	1.68132	2.20152	1.3562	1.36502	1.71376	1.22204	2.97717	3.128	1.2368	1.55136	1.09108	2.24732	2.72901	2.78535	1.31025	1.15523	3.101	3.22314	1.09262	1.00121	1.17852	3.04913	2.86887	1.146
Cell_0135	AMPKARt2	Glucose 17 mM + Glutamine 2.500000e-01 mM + Insulin 10000 ng/ml	0.503001	0.539516	0.68751	0.652968	0.598218	0.540903	0.514504	0.630945	0.673777	0.606479	0.616589	0.505784	0.613202	0.502454	0.63842	0.693763	0.659959	0.683184	0.591295	0.586339	0.556889	0.539165	0.452683	0.497562	0.542121	0.516763	0.611797	0.561254	0.576883	0.812579	0.520043	0.58862	0.548515	0.592874	0.550467	0.55533	0.595299	0.311523	0.587788	0.620503	0.626368	0.547196	0.517566	0.58864	0.433887	0.502647	0.713567
Cell_0136	TFEB_TR	Glucose 17 mM + Glutamine 2.500000e-01 mM + Insulin 10000 ng/ml	0.653489	2.08508	1.25324	1.70122	1.88444	0.646743	1.53536	1.32564	1.12323	1.79829	0.674976	1.03523	1.50366	1.1368	2.9752	0.698854	1.0026	0.903246	2.03469	1.30107	0.986343	0.682792	1.55384	1.3571	2.08163	1.19448	0.461386	1.37538	1.44233	1.62251	1.52618	0.542553	1.12347	1.16847	1.05084	1.60565	1.47348	1.51258	1.58685	2.16893	1.55545	0.556319	1.5478	0.789855	1.53941	2.34953	0.628534
Cell_0136	FOXO_TR	Glucose 17 mM + Glutamine 2.500000e-01 mM + Insulin 10000 ng/ml	1.36447	1.50639	1.28721	2.98347	2.17516	1.12692	1.64478	1.07477	2.59137	2.36933	1.49459	1.26447	1.60968	1.97929	3.35377	1.79654	1.18928	0.89857	3.63258	3.05229	1.6578	1.29293	0.844034	2.09994	2.23621	1.40415	1.55842	1.64739	1.68471	2.99647	3.12947	1.27994	1.57948	1.20159	2.20391	2.6914	2.76278	1.29004	1.15804	3.1157	3.14108	1.08031	1.00506	1.16182	2.90737	2.78528	1.17318
Cell_0136	AMPKARt2	Glucose 17 mM + Glutamine 2.500000e-01 mM + Insulin 10000 ng/ml	0.510847	0.551457	0.674967	0.64444	0.599931	0.548262	0.533739	0.633936	0.664038	0.601104	0.621391	0.496237	0.622261	0.545001	0.63078	0.687912	0.645185	0.693216	0.581295	0.566491	0.551049	0.561251	0.455225	0.464596	0.544593	0.550137	0.577544	0.559302	0.584397	0.854123	0.5231	0.575385	0.554544	0.598815	0.553498	0.544411	0.602865	0.316079	0.605309	0.614362	0.625132	0.531786	0.517483	0.58506	0.4387	0.523997	0.708868
Cell_0137	TFEB_TR	Glucose 17 mM + Glutamine 2.500000e-01 mM + Insulin 10000 ng/ml	0.685591	1.83703	1.37039	1.80579	2.01971	0.652997	1.4569	1.31414	1.22115	1.70458	0.728185	1.06678	1.4127	1.1278	3.47017	0.686099	0.953809	0.916302	2.13338	1.36133	1.04833	0.717933	1.5627	1.28622	1.64124	1.45183	0.479054	1.51496	1.5646	1.57426	0.914211	0.555313	1.13987	1.07433	0.922385	1.31809	1.26979	1.67684	1.60507	1.78809	1.57715	0.573237	1.6007	0.789511	1.47173	2.36598	0.635618
Cell_0137	FOXO_TR	Glucose 17 mM + Glutamine 2.500000e-01 mM + Insulin 10000 ng/ml	1.41856	1.5572	1.32591	3.19222	2.1589	1.1406	1.53001	1.11754	2.56776	2.32895	1.67753	1.25131	1.51705	1.9623	3.37844	1.79896	1.18228	0.880044	3.64181	3.01441	1.73487	1.23549	0.857509	2.26303	2.43309	1.40944	1.6744	1.59383	2.22202	3.06412	1.01644	1.32716	1.51663	1.22939	2.10214	2.60468	2.76009	1.29683	1.17488	3.06542	3.12331	1.0705	1.00616	1.12234	2.98799	2.77519	1.26685
Cell_0137	AMPKARt2	Glucose 17 mM + Glutamine 2.500000e-01 mM + Insulin 10000 ng/ml	0.52214	0.539235	0.683414	0.650217	0.592732	0.574162	0.579598	0.629239	0.65862	0.608173	0.642811	0.503008	0.625668	0.5737	0.634647	0.685697	0.650525	0.688719	0.594112	0.558173	0.542685	0.56407	0.457385	0.468687	0.547322	0.557983	0.53753	0.575723	0.547522	0.790443	0.735541	0.531262	0.559955	0.606895	0.546287	0.54985	0.621259	0.315747	0.600794	0.621352	0.627869	0.537669	0.501801	0.582465	0.453378	0.53355	0.700894
Cell_0138	TFEB_TR	Glucose 17 mM + Glutamine 2.500000e-01 mM + Insulin 10000 ng/ml	0.693974	1.62178	1.31181	1.8459	2.05529	0.664968	1.35531	1.28218	1.30029	1.74124	0.820817	1.00175	1.55424	1.05718	2.70683	0.656756	0.952765	1.08757	2.25536	1.11248	1.09496	0.70864	1.56889	1.40855	1.44734	1.47966	0.532478	1.49655	1.75881	1.69013	0.700312	0.532333	1.17011	0.893805	0.94654	1.3203	1.41659	1.74245	1.60223	1.64917	1.51758	0.572026	1.58913	0.787778	1.65655	2.30707	0.647183
Cell_0138	FOXO_TR	Glucose 17 mM + Glutamine 2.500000e-01 mM + Insulin 10000 ng/ml	1.48131	1.62959	1.79149	3.45244	2.25657	1.15644	1.44985	1.10278	2.54682	2.30882	1.85237	1.16973	1.49646	2.00408	3.36961	1.85283	1.19485	0.889641	3.59597	3.07934	1.79585	1.17946	0.86438	2.38221	2.59637	1.38529	1.68864	1.59351	2.44755	3.1819	1.02041	1.26933	1.51077	1.38811	2.0838	2.70656	2.78262	1.2557	1.18255	3.2103	3.16029	1.06308	0.99663	1.10364	3.13125	2.73009	1.36194
Cell_0138	AMPKARt2	Glucose 17 mM + Glutamine 2.500000e-01 mM + Insulin 10000 ng/ml	0.50087	0.521846	0.685663	0.658612	0.592562	0.559097	0.600895	0.633514	0.654391	0.623796	0.637696	0.518098	0.636521	0.573496	0.637324	0.699565	0.66582	0.682484	0.598464	0.567674	0.540251	0.547135	0.46053	0.47234	0.538202	0.55449	0.501587	0.592306	0.53613	0.689172	0.740955	0.515042	0.547314	0.622183	0.535674	0.568628	0.581424	0.300766	0.597567	0.619622	0.629872	0.533771	0.497535	0.587975	0.478937	0.528968	0.708989
Cell_0139	TFEB_TR	Glucose 17 mM + Glutamine 2.500000e-01 mM + Insulin 10000 ng/ml	0.700601	1.63795	1.12604	1.74281	1.27236	0.682383	1.33783	1.27697	1.20114	1.66456	0.820478	0.969707	1.62411	1.05009	2.77231	0.668757	0.983811	1.11142	2.24785	1.01656	1.06201	0.695563	1.56243	1.60149	1.6751	1.31732	0.644637	1.33721	1.9755	1.66992	0.740096	0.513912	1.09801	1.0432	1.04438	1.16545	1.4882	1.5692	1.65401	1.66734	1.57002	0.549666	1.58597	0.795971	1.96052	2.21806	0.653023
Cell_0139	FOXO_TR	Glucose 17 mM + Glutamine 2.500000e-01 mM + Insulin 10000 ng/ml	1.46838	1.57991	2.41675	3.37646	1.39967	1.17129	1.49116	1.04308	2.5266	2.22645	1.82362	1.13857	1.53503	2.1196	3.30588	1.90336	1.17642	0.884019	3.7151	3.16847	1.74505	1.15732	0.849522	2.54559	2.62665	1.36487	1.66827	1.62032	2.53677	3.14634	0.972553	1.23177	1.56073	1.9476	2.09355	2.0585	2.68211	1.19682	1.2063	3.35657	3.11313	1.04825	0.997244	1.13797	3.13522	2.67401	1.3635
Cell_0139	AMPKARt2	Glucose 17 mM + Glutamine 2.500000e-01 mM + Insulin 10000 ng/ml	0.459775	0.533028	0.664556	0.648971	0.538801	0.506889	0.588957	0.657116	0.642954	0.624548	0.619381	0.52171	0.630249	0.567899	0.632124	0.704333	0.663083	0.684842	0.570279	0.571014	0.54198	0.543805	0.471111	0.482712	0.524097	0.558868	0.470705	0.59055	0.56698	0.689393	0.740743	0.520189	0.539273	0.622618	0.547906	0.588128	0.520813	0.299688	0.621134	0.605238	0.622655	0.522321	0.500828	0.592847	0.487177	0.524512	0.709615
Cell_0140	TFEB_TR	Glucose 17 mM + Glutamine 2.500000e-01 mM + Insulin 10000 ng/ml	0.809713	1.71899	1.04957	1.76339	1.32434	0.688262	1.29952	1.39834	1.16674	1.66314	0.785204	0.949186	1.50129	1.16315	3.2621	0.700747	1.14017	1.09731	2.26377	1.23834	1.05603	0.689168	1.5332	1.55794	1.84907	1.41109	0.751596	1.45672	1.98889	1.53118	0.783925	0.539868	1.02249	1.26231	1.05466	1.01335	1.31563	1.51912	1.82549	1.20879	1.66578	0.567775	1.58615	0.805316	1.74876	2.19515	0.6573
Cell_0140	FOXO_TR	Glucose 17 mM + Glutamine 2.500000e-01 mM + Insulin 10000 ng/ml	1.44266	1.46156	2.66269	3.12476	1.41562	1.18542	1.4752	1.42903	2.56587	2.23715	1.80486	1.11876	1.43582	2.12145	3.16896	1.86021	1.15611	0.845734	3.88784	3.10542	1.70176	1.13893	0.859173	2.66169	2.63177	1.34007	1.62345	1.60912	2.59733	3.09288	0.964165	1.23446	1.55174	2.47052	2.08183	1.95516	2.54776	1.21018	1.4405	3.33177	3.048	1.05729	0.98649	1.07872	3.16437	2.66168	1.34453
Cell_0140	AMPKARt2	Glucose 17 mM + Glutamine 2.500000e-01 mM + Insulin 10000 ng/ml	0.447622	0.558704	0.67142	0.64081	0.549128	0.477209	0.587394	0.668391	0.634684	0.628807	0.617758	0.525298	0.619496	0.55245	0.623364	0.692975	0.658833	0.682814	0.553637	0.560282	0.546614	0.544096	0.482888	0.507492	0.518009	0.574158	0.449042	0.575892	0.57525	0.704861	0.740955	0.521543	0.550584	0.601612	0.570242	0.592557	0.533121	0.361824	0.628472	0.597713	0.622973	0.549441	0.496816	0.598355	0.472003	0.529846	0.692849
Cell_0141	TFEB_TR	Glucose 17 mM + Glutamine 2.500000e-01 mM + Insulin 10000 ng/ml	1.01575	1.68306	1.05355	1.96218	1.32011	0.679336	1.19506	1.54133	1.19549	1.11269	0.805079	0.897257	1.59346	1.19866	3.03922	0.703824	1.17814	1.1147	2.37107	1.46931	1.09578	0.729368	1.53289	1.66175	1.94539	1.51795	0.809953	1.51708	1.97082	1.55354	0.747612	0.552756	1.00383	1.06385	1.1302	0.913703	1.36624	1.56579	2.01131	1.05474	1.08904	0.618315	1.56604	0.764066	1.45576	2.18744	0.6964
Cell_0141	FOXO_TR	Glucose 17 mM + Glutamine 2.500000e-01 mM + Insulin 10000 ng/ml	1.47743	1.45854	2.6387	3.10128	1.44786	1.18946	1.38814	2.15404	2.68279	1.47346	1.94039	1.0817	1.63593	2.00932	3.17734	1.801	1.17319	0.877839	3.95469	3.0913	1.77769	1.11994	0.866051	2.76632	2.6374	1.31045	1.53928	1.58972	2.64123	3.10278	1.0121	1.16378	1.5827	2.55594	2.15095	1.88015	2.47101	1.21567	1.85767	3.30548	1.94546	1.1059	0.961575	1.06213	3.27365	2.70105	1.36708
Cell_0141	AMPKARt2	Glucose 17 mM + Glutamine 2.500000e-01 mM + Insulin 10000 ng/ml	0.459599	0.553263	0.695191	0.64668	0.543374	0.472984	0.600815	0.640362	0.633992	0.653857	0.61632	0.535273	0.642214	0.534161	0.621715	0.693444	0.660842	0.680541	0.555795	0.558763	0.549699	0.528616	0.489167	0.502892	0.535544	0.580464	0.442517	0.573845	0.563265	0.67162	0.740501	0.521729	0.550654	0.595582	0.578377	0.585055	0.566971	0.456942	0.613972	0.599384	0.581051	0.573366	0.495144	0.607969	0.465318	0.539442	0.690992
Cell_0142	TFEB_TR	Glucose 17 mM + Glutamine 2.500000e-01 mM + Insulin 10000 ng/ml	1.2326	1.68012	1.11272	2.05817	1.38291	0.677494	1.15918	1.52827	1.06017	1.11146	0.816551	0.894892	2.08731	1.09674	3.08967	0.683669	1.09078	0.973146	2.33719	1.61994	1.10577	0.815808	1.59437	1.8695	1.96986	1.46015	0.851585	1.31872	2.11605	1.48171	0.727957	0.535751	1.03023	0.910745	1.20083	0.940019	1.51319	1.44881	1.91018	1.86035	1.24857	0.62287	1.58532	0.779468	1.69497	2.19444	0.747138
Cell_0142	FOXO_TR	Glucose 17 mM + Glutamine 2.500000e-01 mM + Insulin 10000 ng/ml	1.49912	1.54173	2.65851	3.14191	1.45607	1.17227	1.3653	2.46356	2.72988	1.57141	1.95794	1.10678	2.48572	1.9842	3.33983	1.85272	1.18607	0.885307	3.88996	3.12775	1.87808	1.13942	0.868572	2.84528	2.58604	1.30209	1.48254	1.58887	2.80066	3.04539	0.998178	1.07488	1.63152	2.53173	2.22369	1.92342	2.3322	1.1531	2.08234	3.31111	1.89056	1.10963	0.957365	1.60142	3.29954	2.81995	1.37175
Cell_0142	AMPKARt2	Glucose 17 mM + Glutamine 2.500000e-01 mM + Insulin 10000 ng/ml	0.459874	0.53577	0.689823	0.632233	0.544349	0.464182	0.604674	0.604432	0.630303	0.65764	0.593559	0.534292	0.642658	0.54328	0.637851	0.688957	0.662528	0.692215	0.544482	0.571984	0.544041	0.51848	0.497721	0.489382	0.575179	0.563529	0.448894	0.596304	0.556011	0.700548	0.737321	0.515744	0.53749	0.604883	0.56374	0.58812	0.554561	0.502693	0.618256	0.599653	0.5973	0.534731	0.495078	0.617536	0.467868	0.536874	0.696202
Cell_0143	TFEB_TR	Glucose 17 mM + Glutamine 2.500000e-01 mM + Insulin 10000 ng/ml	1.47241	1.80265	1.21265	2.02678	1.42817	0.689234	1.19808	1.45967	0.896423	1.13573	0.785823	0.928326	2.37698	1.0945	0.816386	0.719978	1.24319	0.818726	2.3241	1.55025	1.11381	0.777296	1.62281	1.58698	1.89828	1.52775	0.931315	1.35078	2.1825	1.3266	0.693165	0.551548	1.10634	1.04961	1.08818	1.01982	1.46664	1.25298	1.58609	2.19488	1.21102	0.590601	1.60604	0.931068	1.81817	1.46616	0.748495
Cell_0143	FOXO_TR	Glucose 17 mM + Glutamine 2.500000e-01 mM + Insulin 10000 ng/ml	1.45707	1.60473	2.66043	3.05212	1.4473	1.14229	1.36852	2.33645	2.74777	1.53316	1.83577	1.14706	3.17489	2.01581	1.11721	1.96701	1.18302	0.804762	3.79764	3.1059	1.92376	1.1647	0.901174	2.83533	2.54894	1.30114	1.46648	1.55148	2.90604	3.09522	0.961255	1.03582	1.56265	2.62525	2.16369	1.99638	2.14995	1.12564	2.03773	3.25435	1.86153	1.03148	0.957956	2.48455	3.21909	1.92547	1.34998
Cell_0143	AMPKARt2	Glucose 17 mM + Glutamine 2.500000e-01 mM + Insulin 10000 ng/ml	0.450751	0.542436	0.686603	0.600683	0.563557	0.45073	0.606223	0.606005	0.621168	0.652767	0.561673	0.531823	0.564105	0.559389	0.505796	0.647816	0.671428	0.711649	0.543925	0.577095	0.539657	0.519841	0.500807	0.507986	0.597231	0.56039	0.450753	0.61316	0.539216	0.735585	0.742262	0.503943	0.547015	0.59199	0.543468	0.595874	0.544077	0.48948	0.621917	0.591204	0.574931	0.486979	0.486959	0.632537	0.464886	0.656049	0.671357
Cell_0144	TFEB_TR	Glucose 17 mM + Glutamine 2.500000e-01 mM + Insulin 10000 ng/ml	1.73079	1.95561	1.25895	2.01096	1.35622	0.709518	1.21835	1.46003	0.899828	1.11018	0.81087	0.911412	2.16766	1.20501	0.806821	0.820654	1.38659	0.905069	2.43939	1.38373	1.14218	0.709083	1.58796	1.16219	2.04336	1.57205	1.03332	1.47438	2.12195	1.46973	0.75044	0.592605	1.12885	1.03788	0.934583	1.06484	1.56492	1.21417	1.57914	1.39507	1.22399	0.596016	1.56498	1.01523	1.58027	1.10843	0.770924
Cell_0144	FOXO_TR	Glucose 17 mM + Glutamine 2.500000e-01 mM + Insulin 10000 ng/ml	1.43709	1.61406	2.63198	3.04041	1.45883	1.12304	1.34993	2.28425	2.85515	1.46761	1.82429	1.10662	3.17205	1.99173	1.11484	2.03852	1.18769	1.05044	3.84031	3.26938	1.9471	1.13522	0.876468	2.83914	2.5695	1.29039	1.40779	1.53799	2.82286	3.23483	1.02691	1.00409	1.52956	2.67208	2.1113	1.98423	2.03693	1.12658	1.9972	3.24129	1.82554	0.983704	0.948051	2.81331	3.19288	1.90528	1.33601
Cell_0144	AMPKARt2	Glucose 17 mM + Glutamine 2.500000e-01 mM + Insulin 10000 ng/ml	0.44078	0.544942	0.702229	0.598299	0.572064	0.443409	0.614551	0.632604	0.619605	0.647868	0.54308	0.546701	0.48349	0.551934	0.504897	0.604451	0.677436	0.713946	0.556674	0.581507	0.553518	0.514974	0.493469	0.517057	0.588848	0.588447	0.443989	0.607094	0.527883	0.683487	0.748958	0.503712	0.567355	0.577102	0.551932	0.577342	0.546594	0.474855	0.609644	0.585551	0.553807	0.487547	0.479916	0.634293	0.470409	0.664503	0.637678
Cell_0145	TFEB_TR	Glucose 17 mM + Glutamine 2.500000e-01 mM + Insulin 10000 ng/ml	1.9138	2.14891	1.32293	1.91504	1.31568	0.73495	1.23789	1.44811	1.05022	1.05559	0.915605	0.898186	2.01008	1.20696	0.818932	0.875179	1.2047	1.09466	2.41077	0.575857	1.13994	0.829896	1.64173	1.24518	2.01715	1.44547	1.06706	1.29078	2.16712	1.53373	0.883627	0.624689	1.07257	1.0016	0.981416	1.08899	1.72898	1.24793	1.84484	0.923052	1.3384	0.629856	1.51809	0.951258	1.68001	1.25709	0.876381
Cell_0145	FOXO_TR	Glucose 17 mM + Glutamine 2.500000e-01 mM + Insulin 10000 ng/ml	1.45285	1.51086	2.64099	3.07507	1.45976	1.11399	1.35621	2.32784	2.89937	1.49775	1.79106	1.07829	3.06524	2.02902	1.12101	2.05677	1.18517	1.72687	3.92919	1.38289	1.97262	1.09611	0.864222	2.90384	2.5681	1.28781	1.34116	1.58251	2.81346	3.12729	1.08996	0.999538	1.54916	2.65325	2.13594	2.05387	1.96615	1.09141	2.06206	3.29235	1.78648	1.00483	0.944596	2.59503	3.24893	1.94311	1.29922
Cell_0145	AMPKARt2	Glucose 17 mM + Glutamine 2.500000e-01 mM + Insulin 10000 ng/ml	0.414194	0.538248	0.70531	0.610167	0.557315	0.449893	0.616748	0.636647	0.631876	0.650272	0.545331	0.553675	0.472469	0.547234	0.495844	0.593887	0.668706	0.680421	0.536733	0.640008	0.564461	0.513427	0.49949	0.505071	0.583886	0.594342	0.449206	0.601857	0.534918	0.68337	0.739277	0.515074	0.56697	0.591018	0.578071	0.561224	0.531283	0.494573	0.614769	0.590977	0.56179	0.506252	0.483341	0.60467	0.478168	0.678122	0.6242
Cell_0146	TFEB_TR	Glucose 17 mM + Glutamine 2.500000e-01 mM + Insulin 10000 ng/ml	2.05167	2.26183	1.38775	1.70866	1.32974	0.75141	1.25771	1.45557	1.23763	1.14404	0.973642	0.950869	2.0362	1.16776	0.817941	0.969343	1.13315	1.20323	2.44359	0.578039	1.1331	0.921732	1.78923	1.51107	1.51833	1.36474	1.04565	1.18725	2.28521	1.25708	0.863667	0.674836	1.10773	1.06182	1.13937	1.0866	1.54848	1.19468	1.79321	1.32232	1.30555	0.634983	1.47836	0.945516	1.8569	1.5553	0.958119
Cell_0146	FOXO_TR	Glucose 17 mM + Glutamine 2.500000e-01 mM + Insulin 10000 ng/ml	1.4155	1.43551	2.57191	2.98416	1.4472	1.09582	1.3482	2.35526	2.80201	1.56905	1.56082	1.14611	3.09572	2.17552	1.121	2.02279	1.18523	2.20914	3.89895	1.48515	2.0236	1.09533	1.16136	2.91178	2.54935	1.29537	1.34669	1.52313	2.89349	2.92719	1.02767	1.03396	1.43422	2.63689	2.10251	2.2428	1.91261	1.08569	2.18314	3.25981	1.79422	0.993324	0.931346	2.56655	3.20888	2.01014	1.23862
Cell_0146	AMPKARt2	Glucose 17 mM + Glutamine 2.500000e-01 mM + Insulin 10000 ng/ml	0.378481	0.55031	0.698357	0.598916	0.545322	0.466552	0.612664	0.612684	0.641448	0.658357	0.560378	0.539213	0.493103	0.562101	0.492509	0.590273	0.662442	0.641926	0.509878	0.625035	0.536	0.520342	0.50289	0.517434	0.589243	0.560893	0.459847	0.609163	0.536971	0.750775	0.731422	0.518353	0.560693	0.604603	0.580032	0.583609	0.52717	0.522979	0.623515	0.59408	0.572057	0.511333	0.492496	0.586379	0.472625	0.699155	0.615369
Cell_0147	TFEB_TR	Glucose 17 mM + Glutamine 2.500000e-01 mM + Insulin 10000 ng/ml	2.20938	2.14879	1.2531	1.64153	1.32037	0.759958	1.23617	1.56124	1.22886	1.26052	0.965803	0.996785	1.89623	1.21099	0.801417	1.23774	1.25022	1.20642	2.68975	0.611879	1.15981	0.816928	1.86286	1.45299	0.483143	1.2508	1.09192	1.36654	2.33937	1.22429	0.798343	0.714576	1.15402	0.863729	1.06984	1.08591	1.37034	1.16159	1.5844	1.60594	1.22515	0.624916	1.44589	1.00676	1.63766	1.5516	1.06488
Cell_0147	FOXO_TR	Glucose 17 mM + Glutamine 2.500000e-01 mM + Insulin 10000 ng/ml	1.35435	1.49418	2.43268	2.87316	1.47397	1.0718	1.27239	2.41302	2.75442	1.56195	1.40689	1.22655	3.01705	2.29219	1.12277	1.92049	1.19882	2.2544	3.86682	1.51312	2.05557	1.08762	1.69575	2.83717	2.33106	1.29582	1.37068	1.50131	2.85448	2.9186	0.955609	1.03318	1.38658	2.63671	2.04535	2.26166	1.89943	1.1057	2.31124	3.19925	1.81111	0.948091	0.932084	2.71567	3.07238	2.00867	1.21294
Cell_0147	AMPKARt2	Glucose 17 mM + Glutamine 2.500000e-01 mM + Insulin 10000 ng/ml	0.360804	0.55509	0.691145	0.592801	0.549742	0.467463	0.611567	0.597141	0.637527	0.664574	0.57165	0.543117	0.512877	0.568776	0.510131	0.571475	0.670199	0.64046	0.52367	0.615808	0.494595	0.518143	0.458259	0.531122	0.658913	0.540053	0.458275	0.61973	0.529124	0.754428	0.744087	0.512231	0.559489	0.606489	0.572896	0.600125	0.541762	0.520552	0.60914	0.598978	0.566649	0.511922	0.499463	0.597778	0.478835	0.690957	0.60419
Cell_0148	TFEB_TR	Glucose 17 mM + Glutamine 2.500000e-01 mM + Insulin 10000 ng/ml	2.26132	2.04875	1.05053	1.74988	1.32204	0.769889	1.23042	1.60353	0.995779	1.15421	1.00432	0.993473	1.81792	1.178	0.812111	1.43228	1.15636	1.16021	2.6374	0.622911	1.1913	0.77207	1.91489	1.25952	0.485497	1.16936	1.15887	1.38226	2.30722	1.42319	0.845824	0.67865	1.06702	0.74004	0.945271	1.11442	1.47975	1.19473	1.74086	1.47461	1.27088	0.637076	1.49122	0.965763	1.62423	1.46191	1.31846
Cell_0148	FOXO_TR	Glucose 17 mM + Glutamine 2.500000e-01 mM + Insulin 10000 ng/ml	1.33771	1.39022	2.36887	2.77498	1.49685	1.05833	1.24405	2.40886	2.79322	1.48324	1.45343	1.25584	2.99896	2.28967	1.13176	1.78801	1.18498	2.2374	3.90785	1.49636	1.95754	1.07043	2.0777	2.7496	2.26469	1.26773	1.35668	1.9211	2.76117	2.95596	0.983108	0.983961	1.47984	2.61582	2.02988	2.11703	1.90039	1.11513	2.4154	3.22943	1.79136	0.953005	0.967361	2.66589	3.02476	1.93488	1.19947
Cell_0148	AMPKARt2	Glucose 17 mM + Glutamine 2.500000e-01 mM + Insulin 10000 ng/ml	0.364373	0.546866	0.68147	0.612874	0.559672	0.447586	0.613293	0.600118	0.633926	0.664327	0.569879	0.564346	0.532991	0.563676	0.525468	0.557433	0.682913	0.645881	0.545141	0.635386	0.489049	0.515484	0.395408	0.506787	0.656389	0.548585	0.475499	0.621392	0.519662	0.769396	0.74751	0.51969	0.562281	0.613676	0.587481	0.580642	0.537628	0.498052	0.597381	0.608378	0.554879	0.518962	0.4984	0.599917	0.500391	0.662158	0.593167
Cell_0149	TFEB_TR	Glucose 17 mM + Glutamine 2.500000e-01 mM + Insulin 10000 ng/ml	2.15594	2.23974	1.06613	1.78081	1.33043	0.763011	1.25889	1.50141	0.839285	1.03755	1.07232	0.993932	2.20837	1.06766	0.842362	1.40389	1.09667	1.23903	2.32841	0.594981	1.24113	0.865267	1.97159	1.29048	0.471666	1.29805	1.10272	1.16212	2.189	1.1839	0.846691	0.616149	1.11477	1.01692	1.08813	1.0692	1.46458	1.18185	2.0079	1.52923	1.29579	0.645204	1.54627	0.887443	1.88035	1.48933	1.47533
Cell_0149	FOXO_TR	Glucose 17 mM + Glutamine 2.500000e-01 mM + Insulin 10000 ng/ml	1.33029	1.36651	2.37789	2.7674	1.46384	1.05391	1.29941	2.361	2.76694	1.45229	1.4438	1.23315	3.15789	2.20222	1.13215	1.68327	1.1678	2.28863	3.89265	1.48315	1.79236	1.07728	2.20144	2.7086	2.34509	1.2052	1.30948	2.61732	2.65501	1.41654	1.05729	0.938234	1.44125	2.46421	1.98567	2.07991	1.88484	1.14519	2.53075	3.24321	1.79392	0.973656	0.950168	2.57493	3.00635	1.95993	1.14682
Cell_0149	AMPKARt2	Glucose 17 mM + Glutamine 2.500000e-01 mM + Insulin 10000 ng/ml	0.386782	0.561114	0.68311	0.623336	0.568438	0.44443	0.617887	0.599986	0.635458	0.664283	0.56358	0.558101	0.53729	0.570101	0.515297	0.562112	0.687839	0.62009	0.539449	0.663679	0.492909	0.52664	0.374789	0.485612	0.663198	0.555092	0.523076	0.605273	0.509532	0.556761	0.72474	0.542176	0.578446	0.613175	0.600681	0.563798	0.521268	0.493333	0.59355	0.600621	0.555349	0.524609	0.494138	0.591893	0.507963	0.670696	0.587319
Cell_0150	TFEB_TR	Glucose 17 mM + Glutamine 2.500000e-01 mM + Insulin 10000 ng/ml	2.04809	2.90581	1.14333	1.69615	1.34309	0.741989	1.23567	1.43703	0.827366	1.07412	1.12214	1.00631	2.7439	1.05618	0.856381	1.38859	1.29283	1.37353	2.3208	0.581369	1.31536	0.885781	1.87276	1.41717	0.473432	1.24569	1.02716	1.15578	2.08223	1.28156	0.759447	0.601117	1.37026	1.0678	1.05958	0.962102	1.30187	1.13642	2.03821	1.69584	1.2833	0.626629	1.50835	0.921666	1.86839	1.64331	1.41808
Cell_0150	FOXO_TR	Glucose 17 mM + Glutamine 2.500000e-01 mM + Insulin 10000 ng/ml	1.32167	2.15071	2.43435	3.04163	1.46595	1.04028	1.21172	2.40344	2.69591	1.4697	1.36792	1.20788	3.23474	2.22457	1.13273	1.62397	1.18067	2.30276	3.84032	1.47906	1.70598	1.06101	2.17755	2.77278	2.36807	1.13993	1.26062	3.05865	2.52917	1.36148	1.06764	0.918868	1.57326	2.30675	1.97801	2.09815	1.86914	1.11472	2.6296	3.16987	1.79539	0.949716	0.921366	2.58688	2.91398	2.13488	1.12068
Cell_0150	AMPKARt2	Glucose 17 mM + Glutamine 2.500000e-01 mM + Insulin 10000 ng/ml	0.424044	0.563161	0.691587	0.617488	0.570046	0.463959	0.627448	0.591362	0.632373	0.661345	0.560976	0.54548	0.532756	0.578522	0.511173	0.563435	0.681928	0.591428	0.526158	0.663236	0.466451	0.534992	0.39112	0.49962	0.667043	0.550269	0.552525	0.592702	0.500733	0.551346	0.703526	0.550021	0.57758	0.605239	0.601926	0.546642	0.51975	0.519557	0.578757	0.591429	0.573853	0.519239	0.496751	0.587928	0.51464	0.687038	0.601499
Cell_0151	TFEB_TR	Glucose 17 mM + Glutamine 2.500000e-01 mM + Insulin 10000 ng/ml	1.96061	3.79023	1.07764	1.0763	1.358	0.739053	1.20244	1.48758	0.869964	0.98984	1.18248	1.00121	2.63876	1.05845	0.856027	1.43824	1.31742	1.25583	2.45903	0.591875	1.36509	0.820619	1.83502	1.40199	0.494308	1.07504	1.0561	1.44374	2.10657	1.19727	0.702562	0.608538	1.50476	0.798856	1.79747	0.993224	1.40141	1.16675	2.07631	1.35744	1.32534	0.621492	1.49896	1.02126	1.88551	1.98415	1.45942
Cell_0151	FOXO_TR	Glucose 17 mM + Glutamine 2.500000e-01 mM + Insulin 10000 ng/ml	1.31172	3.16941	2.47764	1.45806	1.53829	1.01786	1.11369	2.43032	2.72495	1.46957	1.38579	1.24049	3.17408	2.3797	1.13604	1.59151	1.16014	2.25612	3.82623	1.48887	1.66883	1.02517	2.15743	2.8447	2.27605	1.08863	1.26427	3.14515	2.57686	1.37929	0.98606	0.915189	2.08787	2.32073	2.17116	2.04608	1.89875	1.14429	2.67655	3.12918	1.71951	0.929047	0.980419	2.57333	2.91699	2.1942	1.14772
Cell_0151	AMPKARt2	Glucose 17 mM + Glutamine 2.500000e-01 mM + Insulin 10000 ng/ml	0.450503	0.520143	0.685526	0.599644	0.55856	0.459575	0.63321	0.583678	0.633729	0.650032	0.560255	0.553021	0.542949	0.567854	0.535835	0.548634	0.682865	0.587545	0.523209	0.649106	0.444456	0.53054	0.412009	0.511623	0.653699	0.54761	0.55421	0.603997	0.493155	0.564223	0.691883	0.541208	0.546658	0.608563	0.608447	0.49149	0.525853	0.541219	0.566266	0.605774	0.582226	0.518378	0.494855	0.573938	0.534947	0.668129	0.612315
Cell_0152	TFEB_TR	Glucose 17 mM + Glutamine 2.500000e-01 mM + Insulin 10000 ng/ml	1.80535	3.9045	1.1449	0.920161	1.33429	0.747025	1.27989	1.55987	1.00194	0.846577	1.16685	1.00241	1.97725	1.00402	0.844786	1.49434	1.08054	1.00993	2.41805	0.607008	1.38315	0.832338	2.07007	1.4534	0.493052	1.26065	1.0336	1.61745	2.21271	1.10756	0.714989	0.588133	1.49028	0.803511	1.84027	1.11887	1.66534	1.36428	2.15888	1.09625	1.33952	0.640093	1.57917	1.0889	2.00399	2.0794	1.57036
Cell_0152	FOXO_TR	Glucose 17 mM + Glutamine 2.500000e-01 mM + Insulin 10000 ng/ml	1.26121	3.28641	2.38066	1.47097	1.56577	1.01418	1.57101	2.38513	2.82677	1.48684	1.40409	1.20026	3.13658	2.33759	1.12437	1.55218	1.13312	2.14658	3.79373	1.51186	1.60104	1.04205	2.27456	2.77264	2.24707	1.0478	1.27223	3.06561	2.74577	1.42118	0.956256	0.90133	2.3226	2.3003	2.16418	2.02109	1.95487	1.60413	2.75521	3.14884	1.67813	0.938552	0.970325	2.60362	3.02246	2.02648	1.14062
Cell_0152	AMPKARt2	Glucose 17 mM + Glutamine 2.500000e-01 mM + Insulin 10000 ng/ml	0.454245	0.491682	0.674246	0.621279	0.538506	0.435832	0.610679	0.578408	0.652357	0.651021	0.564893	0.548189	0.550635	0.554126	0.551894	0.540739	0.696919	0.604297	0.519867	0.650163	0.451915	0.526043	0.424938	0.498167	0.64017	0.5539	0.558124	0.610572	0.494334	0.580798	0.672835	0.550594	0.544996	0.612495	0.608014	0.42813	0.524727	0.494787	0.563412	0.615958	0.55288	0.531086	0.480999	0.557493	0.543632	0.667419	0.600696
Cell_0153	TFEB_TR	Glucose 17 mM + Glutamine 2.500000e-01 mM + Insulin 10000 ng/ml	1.65607	3.30512	1.40259	0.850263	1.38509	0.747974	1.4202	1.62346	0.882831	0.915659	1.11911	1.03034	1.95953	1.03743	0.82875	1.61105	0.904417	0.968915	2.36781	0.620973	1.37621	0.934826	2.19019	1.67248	0.4712	1.30466	0.905913	1.60854	2.26409	1.18035	0.77691	0.540139	1.48652	0.891423	1.82706	1.15246	1.75901	1.65025	2.06106	1.16443	1.37334	0.646163	1.59503	1.1261	1.81142	1.74793	1.47294
Cell_0153	FOXO_TR	Glucose 17 mM + Glutamine 2.500000e-01 mM + Insulin 10000 ng/ml	1.21423	2.88148	2.27624	1.47493	1.52286	1.02284	2.41843	2.39404	1.66517	1.48404	1.38168	1.1635	3.14504	2.21456	1.11554	1.50873	1.15115	2.07645	3.77131	1.53066	1.50719	1.05922	2.35724	2.73335	2.23407	1.02814	1.20782	3.01063	2.75737	1.40165	1.04526	0.8774	2.21228	2.16379	2.21025	2.02465	1.92562	2.22178	2.85564	2.06083	1.73644	0.935419	0.964932	2.72172	3.00973	1.9279	1.12792
Cell_0153	AMPKARt2	Glucose 17 mM + Glutamine 2.500000e-01 mM + Insulin 10000 ng/ml	0.451845	0.507552	0.671071	0.638364	0.512387	0.445991	0.557149	0.572671	0.557712	0.667496	0.574854	0.542843	0.537364	0.559227	0.538834	0.543404	0.69813	0.623793	0.5076	0.660791	0.451761	0.535331	0.43214	0.482145	0.643413	0.567959	0.560228	0.594868	0.502893	0.580542	0.650014	0.578755	0.573786	0.611041	0.604026	0.398019	0.520651	0.391574	0.554857	0.487612	0.502799	0.533411	0.487731	0.553643	0.542202	0.687635	0.603833
Cell_0154	TFEB_TR	Glucose 17 mM + Glutamine 2.500000e-01 mM + Insulin 10000 ng/ml	1.61381	3.20785	1.40979	0.896896	1.55382	0.749175	1.52017	1.67466	0.932149	0.990331	1.31398	1.08655	2.67061	1.12243	0.844285	1.69194	0.923898	1.08389	2.32051	0.61313	1.36534	0.973444	2.0606	1.67261	0.474263	0.918159	0.844194	1.66499	2.24652	1.21	0.797441	0.522692	1.4941	0.739072	1.78274	1.25859	1.6713	1.74605	2.0229	1.17299	1.47764	0.65034	1.56321	1.15652	1.7694	1.72734	1.3657
Cell_0154	FOXO_TR	Glucose 17 mM + Glutamine 2.500000e-01 mM + Insulin 10000 ng/ml	1.20394	2.77169	2.354	1.46168	1.48082	1.01224	2.85254	2.41542	1.87316	1.39423	1.44061	1.69836	3.15382	2.47434	1.12761	1.50296	1.12008	2.11638	3.75851	1.53921	1.44006	1.05465	2.24111	2.90878	2.16821	1.01434	1.13462	3.13995	2.71001	1.41652	1.08346	0.877323	2.38811	2.12378	2.23408	1.98526	1.83378	2.32867	2.89756	2.02817	1.7438	0.930259	1.3925	2.72347	2.92843	2.02984	1.16512
Cell_0154	AMPKARt2	Glucose 17 mM + Glutamine 2.500000e-01 mM + Insulin 10000 ng/ml	0.45305	0.522235	0.661771	0.639237	0.486258	0.468528	0.509621	0.566377	0.578356	0.656502	0.575118	0.555141	0.523891	0.576508	0.529227	0.535982	0.685803	0.624103	0.501292	0.665934	0.444984	0.55652	0.440487	0.482186	0.655993	0.576018	0.560493	0.583051	0.497272	0.567414	0.634608	0.582843	0.575146	0.607565	0.59905	0.385157	0.525478	0.323493	0.543493	0.516857	0.460285	0.523932	0.517876	0.551756	0.546957	0.65678	0.621777
Cell_0155	TFEB_TR	Glucose 17 mM + Glutamine 2.500000e-01 mM + Insulin 10000 ng/ml	1.6334	3.46273	1.25331	1.03861	1.65411	0.740869	1.58835	1.67577	1.03436	0.925139	1.59751	1.21358	2.75277	1.86594	0.880394	1.71946	1.13384	1.19543	2.1396	0.592788	1.38168	0.852939	2.00751	1.4098	0.500311	0.84509	0.836506	1.72521	2.27766	1.08326	0.817766	0.572606	1.50168	0.675645	1.76059	1.50241	1.59364	1.67091	2.14248	1.16369	1.48376	0.671365	1.64456	1.18246	1.65456	2.09221	1.42078
Cell_0155	FOXO_TR	Glucose 17 mM + Glutamine 2.500000e-01 mM + Insulin 10000 ng/ml	1.19416	2.85409	2.48303	1.46513	1.42859	0.994392	2.79318	2.37891	1.99251	1.32761	1.51849	2.73658	3.13038	2.47359	1.13862	1.52828	1.17347	2.12118	3.63712	1.54443	1.43707	1.09552	2.16566	3.01747	2.18818	0.993675	1.09428	3.30373	2.74904	1.51641	1.00677	0.912386	2.6216	2.12039	2.25531	1.93788	1.83684	2.1126	2.91943	2.05039	1.68462	0.953341	2.06516	2.58565	2.82406	2.1056	1.15702
Cell_0155	AMPKARt2	Glucose 17 mM + Glutamine 2.500000e-01 mM + Insulin 10000 ng/ml	0.459921	0.518619	0.650234	0.619409	0.471676	0.462071	0.481651	0.565784	0.576616	0.604478	0.567868	0.531834	0.5246	0.644568	0.542296	0.53051	0.687353	0.624136	0.500818	0.665481	0.466748	0.56595	0.439966	0.495598	0.671946	0.565697	0.573972	0.582431	0.486654	0.560687	0.633788	0.560401	0.5608	0.594526	0.601472	0.388776	0.536043	0.314351	0.542102	0.494845	0.418912	0.527936	0.515331	0.544349	0.519563	0.597894	0.617837
Cell_0156	TFEB_TR	Glucose 17 mM + Glutamine 2.500000e-01 mM + Insulin 10000 ng/ml	1.62803	3.37893	1.36077	1.06827	1.64939	0.721765	1.6419	1.65881	1.06393	0.929293	1.56537	1.3917	2.22831	2.10179	0.877713	1.8004	1.27931	1.22126	2.03785	0.60206	1.35281	0.728808	1.99918	1.36424	0.505552	1.12943	0.787732	1.7214	2.36106	1.10891	0.983149	0.616227	1.48958	0.75997	1.84081	1.56582	1.69558	1.77326	1.96616	1.19316	1.46305	0.677693	1.77333	1.18552	1.41748	2.08675	1.37179
Cell_0156	FOXO_TR	Glucose 17 mM + Glutamine 2.500000e-01 mM + Insulin 10000 ng/ml	1.20577	2.99411	2.53959	1.47683	1.34058	0.983495	2.67947	2.35599	2.03922	1.32329	1.50676	3.31586	3.01527	2.40953	1.14068	1.53096	1.59823	2.03793	3.55579	1.57781	1.43685	1.06141	2.2553	2.8489	2.26069	0.991946	1.07401	3.27776	2.69827	1.54629	0.931272	0.944578	2.51094	2.03456	2.28124	1.84963	1.88319	2.14216	2.93683	2.04765	1.67029	0.969635	2.38098	2.47176	2.69455	2.04176	1.10015
Cell_0156	AMPKARt2	Glucose 17 mM + Glutamine 2.500000e-01 mM + Insulin 10000 ng/ml	0.472491	0.514027	0.658293	0.613287	0.462077	0.468742	0.458767	0.570799	0.574176	0.559771	0.576047	0.475899	0.526585	0.651595	0.555044	0.544193	0.690258	0.639892	0.488732	0.663967	0.489791	0.564891	0.426911	0.506593	0.680163	0.555788	0.58053	0.577815	0.498058	0.566308	0.658341	0.557072	0.556656	0.590358	0.612335	0.422615	0.53626	0.315897	0.545688	0.49303	0.36886	0.54128	0.481221	0.533457	0.537086	0.585672	0.603745
Cell_0157	TFEB_TR	Glucose 17 mM + Glutamine 2.500000e-01 mM + Insulin 10000 ng/ml	1.58156	3.35572	1.49914	0.946698	1.60703	0.718819	1.66614	1.68289	1.00461	1.03024	1.40376	1.4918	2.19501	2.04169	0.845658	1.81689	1.17187	1.1523	0.618635	0.627983	1.25513	0.785968	1.93	1.57291	0.494668	1.23103	0.756868	1.73288	2.36058	1.36828	1.13306	0.595178	1.55967	0.803385	1.97176	1.58362	1.83544	1.97501	1.62489	1.23657	1.56949	0.659816	1.82666	1.13791	1.36449	1.70496	1.20156
Cell_0157	FOXO_TR	Glucose 17 mM + Glutamine 2.500000e-01 mM + Insulin 10000 ng/ml	1.19487	3.17591	2.537	1.44373	1.25674	0.987119	2.60004	2.37826	2.06776	1.27099	1.46662	3.17562	2.88531	2.39815	1.14843	1.50118	2.13412	1.97213	2.16598	1.6614	1.40822	1.02859	2.31075	2.67169	2.2562	0.994536	1.08481	3.23542	2.6165	1.52962	0.892785	0.929702	2.41366	1.97259	2.25492	1.69683	1.84719	2.25914	2.94411	2.06733	1.63906	0.958288	2.40564	2.41486	2.77585	1.90413	1.07544
Cell_0157	AMPKARt2	Glucose 17 mM + Glutamine 2.500000e-01 mM + Insulin 10000 ng/ml	0.478905	0.506654	0.666954	0.624673	0.452869	0.491813	0.45251	0.57071	0.573257	0.546404	0.59226	0.446199	0.52599	0.647268	0.545581	0.558972	0.679841	0.638287	0.625588	0.657072	0.488807	0.581286	0.427997	0.500721	0.671892	0.565256	0.573001	0.566067	0.517631	0.57127	0.69128	0.571723	0.548857	0.602178	0.619438	0.435319	0.529981	0.328381	0.541186	0.521902	0.333931	0.548416	0.475036	0.522637	0.540707	0.613724	0.596978
Cell_0158	TFEB_TR	Glucose 17 mM + Glutamine 2.500000e-01 mM + Insulin 10000 ng/ml	1.54763	3.37061	1.41217	1.00909	1.50725	0.725874	1.691	1.72102	1.00228	1.14731	1.45195	1.46935	2.40714	1.8525	0.830356	1.71955	1.12746	1.16238	0.608893	0.637904	1.19799	0.870182	1.96164	1.58012	0.501656	1.27242	0.736585	1.70282	2.27905	1.48561	1.09593	0.564165	1.84461	0.889839	1.98022	1.85817	1.74162	1.85901	1.76263	1.09638	1.62297	0.653292	1.84613	1.08559	1.45967	1.57532	1.17562
Cell_0158	FOXO_TR	Glucose 17 mM + Glutamine 2.500000e-01 mM + Insulin 10000 ng/ml	1.12387	3.1403	2.46242	1.401	1.19659	1.01476	2.56535	2.47224	2.01795	1.20679	1.43531	2.89437	2.94488	2.35667	1.15317	1.47334	2.3023	1.9368	2.21482	1.72138	1.41525	1.44551	2.28365	2.67395	2.24736	0.980385	1.0382	3.32612	2.71959	1.6182	0.882288	0.910102	2.49264	1.96358	2.30041	1.60218	1.8161	2.18013	3.00284	2.12488	1.53295	0.951301	2.44396	2.38896	2.78806	1.75346	1.03789
Cell_0158	AMPKARt2	Glucose 17 mM + Glutamine 2.500000e-01 mM + Insulin 10000 ng/ml	0.478204	0.496872	0.657001	0.619637	0.450652	0.466741	0.464129	0.57232	0.56315	0.529536	0.58796	0.434969	0.531923	0.655066	0.529211	0.565819	0.686351	0.630141	0.61731	0.643446	0.496878	0.581418	0.439447	0.495903	0.663522	0.571523	0.585434	0.549626	0.523131	0.573632	0.701926	0.565923	0.544907	0.599039	0.616294	0.393751	0.534992	0.368498	0.528254	0.52229	0.329658	0.550931	0.485404	0.519579	0.553201	0.632927	0.59653
Cell_0159	TFEB_TR	Glucose 17 mM + Glutamine 2.500000e-01 mM + Insulin 10000 ng/ml	1.56024	3.1684	1.31946	1.17247	1.43033	0.721179	1.76244	1.70153	1.04261	1.27638	1.55411	1.41058	2.2542	1.85673	0.825336	1.64862	1.219	1.24544	0.626463	0.642455	1.16717	0.833079	2.06387	1.27166	0.523473	1.32605	0.697973	1.71801	2.21945	1.33659	0.99687	0.552664	2.10836	0.951862	1.94193	1.97603	1.53501	1.5905	2.15986	0.907748	1.6303	0.671681	1.85802	1.08618	1.47109	1.76558	1.2028
Cell_0159	FOXO_TR	Glucose 17 mM + Glutamine 2.500000e-01 mM + Insulin 10000 ng/ml	1.13507	2.98471	2.42377	1.41168	1.1469	0.991321	2.65122	2.56573	1.92185	1.21513	1.4177	2.69256	3.15431	2.3903	1.13814	1.4567	2.18543	1.90107	2.21901	1.68903	1.41306	2.1516	2.30117	1.75487	2.24684	0.990749	1.03532	3.39355	2.79627	1.7163	0.899726	0.927387	2.54415	1.982	2.4503	1.57206	1.81864	2.11525	3.05039	2.07106	1.4563	0.967349	2.44493	2.35531	2.63438	1.65511	0.997085
Cell_0159	AMPKARt2	Glucose 17 mM + Glutamine 2.500000e-01 mM + Insulin 10000 ng/ml	0.482943	0.50408	0.656996	0.622203	0.444085	0.429375	0.470281	0.585219	0.568537	0.495237	0.571877	0.436105	0.541137	0.665758	0.526037	0.57782	0.704086	0.64601	0.634977	0.63413	0.509669	0.52601	0.42705	0.508162	0.653775	0.559939	0.607912	0.537425	0.518743	0.58106	0.702323	0.559692	0.55273	0.593522	0.611078	0.355476	0.547211	0.399334	0.519022	0.504992	0.329558	0.547799	0.468403	0.524353	0.563593	0.625943	0.608496
Cell_0160	TFEB_TR	Glucose 17 mM + Glutamine 2.500000e-01 mM + Insulin 10000 ng/ml	1.58722	3.33696	1.26859	1.05507	1.45858	0.717475	1.84446	1.6074	1.04174	1.32518	1.52262	1.36868	2.09916	1.95064	0.82664	1.60608	1.14044	1.21332	0.660943	0.65261	1.10817	0.895892	2.06748	1.24603	0.530195	1.17416	0.756495	1.90434	2.16902	1.15198	0.910237	0.539871	2.15358	0.953004	2.01481	1.77932	1.41269	1.67546	2.16102	1.03166	1.76183	0.684373	1.87807	1.09563	1.49622	1.71201	1.10398
Cell_0160	FOXO_TR	Glucose 17 mM + Glutamine 2.500000e-01 mM + Insulin 10000 ng/ml	1.17458	2.98206	2.48637	1.44055	1.11976	0.950075	2.74362	2.45686	2.04714	1.23067	1.41652	2.56245	3.24837	2.48865	1.12634	1.43305	2.06787	1.86095	2.25721	1.62247	1.34805	2.48059	2.36521	1.67647	2.23651	1.01856	1.45306	3.41617	2.68086	1.70133	0.916496	0.886452	2.57646	2.01269	2.46063	1.51567	1.79152	2.15163	2.97835	1.99265	1.43896	0.989431	2.48347	2.28413	2.59624	1.5926	1.01046
Cell_0160	AMPKARt2	Glucose 17 mM + Glutamine 2.500000e-01 mM + Insulin 10000 ng/ml	0.488432	0.523173	0.673399	0.643114	0.435063	0.452566	0.478587	0.593497	0.59054	0.471716	0.573767	0.469043	0.546816	0.659868	0.520663	0.589571	0.695547	0.656538	0.647791	0.63252	0.500947	0.484395	0.409973	0.520026	0.623826	0.558908	0.596525	0.537204	0.518016	0.580028	0.709452	0.587794	0.556148	0.604652	0.611207	0.342969	0.554851	0.391784	0.520011	0.498961	0.318329	0.540738	0.446234	0.531323	0.552191	0.615518	0.619424
Cell_0161	TFEB_TR	Glucose 17 mM + Glutamine 2.500000e-01 mM + Insulin 10000 ng/ml	1.61465	3.9554	1.24276	0.984944	1.52511	0.721335	1.83735	1.5186	1.09044	1.283	1.45887	1.32936	2.27792	1.91464	0.848929	1.57103	1.01713	1.1229	0.679117	0.672604	1.09748	1.07267	1.96537	1.22243	0.509414	1.04507	0.90024	2.07655	1.0636	1.10929	0.928496	0.540457	2.16947	1.0993	2.08183	1.7717	1.38547	1.89325	1.86592	1.20572	1.74945	0.677538	1.95819	1.10545	1.67486	1.66538	1.0611
Cell_0161	FOXO_TR	Glucose 17 mM + Glutamine 2.500000e-01 mM + Insulin 10000 ng/ml	1.16228	3.01193	2.53797	1.43095	1.12397	1.07477	2.72643	2.28048	2.40939	1.21709	1.3343	2.57466	3.20664	2.43018	1.14108	1.42412	1.98115	1.86577	2.28473	1.56253	1.31465	2.45587	2.32137	1.61132	2.35285	1.00813	2.12872	3.46478	1.35039	1.67546	0.933796	0.870087	2.59649	2.0089	2.3297	1.49407	1.77941	2.1276	2.86808	2.08107	1.40035	0.988206	2.65477	2.27673	2.70334	1.5178	1.01634
Cell_0161	AMPKARt2	Glucose 17 mM + Glutamine 2.500000e-01 mM + Insulin 10000 ng/ml	0.490034	0.525366	0.680206	0.644008	0.44389	0.489484	0.50186	0.590832	0.59499	0.472429	0.59524	0.495414	0.54974	0.661178	0.506922	0.589691	0.685286	0.660167	0.637556	0.632546	0.496196	0.510442	0.420385	0.53608	0.587233	0.572093	0.562456	0.540507	0.482825	0.56247	0.70432	0.619261	0.549852	0.596103	0.613647	0.334351	0.555812	0.371828	0.524549	0.506882	0.324737	0.543774	0.445258	0.539358	0.54236	0.617664	0.615563
Cell_0162	TFEB_TR	Glucose 17 mM + Glutamine 2.500000e-01 mM + Insulin 10000 ng/ml	1.71498	4.48964	1.30613	1.21644	1.54128	0.719502	1.75261	1.49579	1.22179	1.3119	1.50753	1.27702	2.48061	1.87968	0.8685	1.55995	1.07866	1.05917	0.6806	0.703348	1.12164	1.04763	1.86471	1.23049	0.531388	1.14349	0.973615	2.10949	1.0771	1.25178	1.09583	0.576321	2.22709	1.11441	2.06387	1.90955	1.52352	1.71098	1.69101	1.14978	1.42954	0.684072	2.02419	1.14433	1.68602	2.50168	1.1405
Cell_0162	FOXO_TR	Glucose 17 mM + Glutamine 2.500000e-01 mM + Insulin 10000 ng/ml	1.55331	3.00749	2.61549	1.40939	1.1222	1.18379	2.62702	2.32932	2.63163	1.23027	1.25309	2.58778	3.22122	2.30907	1.14035	1.45175	1.94478	1.97858	2.2627	1.4767	1.33818	2.43885	2.14619	1.65289	2.50469	0.992548	2.46614	3.47923	1.334	1.71557	0.924526	1.18406	2.56702	2.04385	2.32262	1.51648	1.74589	2.0958	2.82504	2.18406	1.33794	0.978152	2.735	2.32845	2.75204	1.51409	0.999656
Cell_0162	AMPKARt2	Glucose 17 mM + Glutamine 2.500000e-01 mM + Insulin 10000 ng/ml	0.490971	0.516473	0.677381	0.640138	0.454034	0.48845	0.522593	0.587131	0.596201	0.490911	0.612811	0.496962	0.551785	0.674713	0.510885	0.590904	0.701332	0.674595	0.623899	0.632484	0.501725	0.539965	0.424556	0.534552	0.557414	0.567672	0.529222	0.541634	0.485873	0.549188	0.68896	0.615705	0.532882	0.577679	0.603511	0.370466	0.555514	0.370776	0.526251	0.52507	0.355803	0.558851	0.45028	0.543863	0.545457	0.610744	0.6093
Cell_0163	TFEB_TR	Glucose 17 mM + Glutamine 2.500000e-01 mM + Insulin 10000 ng/ml	1.9683	4.70098	0.997739	1.16919	1.45955	0.718261	1.72851	1.51756	1.30537	1.45886	1.66145	1.21501	2.29157	1.96765	0.865873	1.49814	1.15452	1.08876	0.685756	0.712522	1.12028	0.892982	1.8124	1.2713	0.664434	1.16018	1.00042	2.0588	1.09205	1.38885	1.1113	0.67374	2.27954	0.498587	2.05257	1.91025	1.66443	1.42861	1.7362	1.24164	1.24382	0.697369	2.00787	1.13642	1.49746	3.33283	1.11147
Cell_0163	FOXO_TR	Glucose 17 mM + Glutamine 2.500000e-01 mM + Insulin 10000 ng/ml	2.49389	3.09884	1.0685	1.41474	1.09634	1.11143	2.58807	2.48243	2.56651	1.25468	1.3446	2.55516	3.28521	2.30865	1.09673	1.44051	1.97216	2.06165	2.27446	1.3924	1.35981	2.4129	2.08133	1.79107	2.50056	1.02063	2.49317	3.48552	1.3244	1.71888	0.864144	1.67966	2.59566	0.981497	2.42151	1.47517	1.76607	2.13674	2.88244	2.12534	1.29819	0.986708	2.68258	2.25173	2.71148	1.58932	0.976262
Cell_0163	AMPKARt2	Glucose 17 mM + Glutamine 2.500000e-01 mM + Insulin 10000 ng/ml	0.471579	0.517456	0.38037	0.639915	0.45042	0.489021	0.527121	0.586185	0.608437	0.511387	0.607972	0.514796	0.555952	0.675652	0.527837	0.598346	0.711486	0.668868	0.618605	0.627204	0.499151	0.527327	0.405338	0.534377	0.534263	0.551989	0.488071	0.539846	0.492747	0.54363	0.692475	0.579626	0.51203	0.511837	0.567141	0.45228	0.574752	0.380796	0.528805	0.536701	0.37384	0.569904	0.453862	0.540565	0.551618	0.592089	0.60753
Cell_0164	TFEB_TR	Glucose 17 mM + Glutamine 2.500000e-01 mM + Insulin 10000 ng/ml	2.28055	4.31984	1.03774	0.907793	1.36914	0.729278	1.79978	1.60155	1.33233	1.56308	1.71658	1.15264	1.93451	2.10379	0.863592	1.40715	1.10372	1.26729	0.694851	0.704264	1.14724	0.908513	1.73443	1.3011	0.794769	0.964063	1.06829	1.95705	1.10333	1.34244	0.981935	0.831854	2.4072	0.506353	2.05775	1.94452	1.62076	1.55929	1.87618	1.36897	1.48117	0.678894	2.00329	1.06627	1.43473	2.92768	0.989672
Cell_0164	FOXO_TR	Glucose 17 mM + Glutamine 2.500000e-01 mM + Insulin 10000 ng/ml	3.22982	3.22228	1.07779	1.40539	1.08733	1.45003	2.76447	2.5217	2.45844	1.2414	1.34427	2.61563	3.31015	2.33805	1.06591	1.3659	1.97494	2.04806	2.27954	1.36043	1.35925	2.39576	2.17974	1.88311	2.48561	1.05639	2.55307	3.54878	1.32298	1.62641	0.851317	1.87132	2.70327	0.981244	2.41188	1.42748	2.15514	2.15436	3.00351	2.03142	1.2745	0.9561	2.67919	2.09885	2.68645	1.5916	0.944276
Cell_0164	AMPKARt2	Glucose 17 mM + Glutamine 2.500000e-01 mM + Insulin 10000 ng/ml	0.424628	0.514916	0.3559	0.613574	0.458404	0.510378	0.517503	0.600095	0.568934	0.525386	0.597122	0.538985	0.556952	0.669739	0.531063	0.594903	0.698859	0.659462	0.623703	0.617414	0.509693	0.503512	0.407818	0.551659	0.542612	0.550962	0.461557	0.53409	0.493659	0.530936	0.708222	0.535503	0.508705	0.542024	0.51947	0.486504	0.600489	0.36984	0.537449	0.547508	0.371074	0.570366	0.456519	0.539375	0.562398	0.592879	0.611495
Cell_0165	TFEB_TR	Glucose 17 mM + Glutamine 2.500000e-01 mM + Insulin 10000 ng/ml	2.43347	3.58833	1.02311	1.10747	1.39379	0.760337	1.85472	0.619968	1.41576	1.51546	1.59551	1.0878	2.02262	2.20837	0.877342	1.41421	1.03797	1.26678	0.69775	0.741736	1.17357	1.03044	1.7249	1.2917	0.798019	0.968232	1.09439	1.9871	1.11485	1.27754	1.01549	0.948049	2.46458	0.51382	2.12443	1.94812	1.67261	1.74874	1.27111	1.07352	1.77026	0.6689	2.04419	1.0109	1.35571	2.58375	0.958357
Cell_0165	FOXO_TR	Glucose 17 mM + Glutamine 2.500000e-01 mM + Insulin 10000 ng/ml	3.33105	3.25555	1.07377	1.35881	1.10234	2.4093	2.97534	0.851578	2.46728	1.23474	1.23663	2.67465	3.33894	2.32745	1.07311	1.32454	1.96373	2.1485	2.22135	1.36372	1.29091	2.45427	2.19301	1.86232	2.45783	1.06778	2.56378	3.63171	1.32632	1.54288	0.910779	1.76805	2.70867	0.990847	2.27864	1.44723	2.77518	2.11639	2.42779	2.00589	1.24009	0.940983	2.66449	2.07335	2.72964	1.51084	0.978948
Cell_0165	AMPKARt2	Glucose 17 mM + Glutamine 2.500000e-01 mM + Insulin 10000 ng/ml	0.382089	0.508835	0.373614	0.588295	0.481021	0.509353	0.507474	0.448146	0.472819	0.559999	0.609733	0.535951	0.55413	0.664492	0.528687	0.587151	0.6816	0.689807	0.635879	0.61672	0.532834	0.490524	0.427042	0.547865	0.583717	0.555289	0.47683	0.53154	0.489287	0.524896	0.711654	0.520278	0.517121	0.538059	0.493667	0.463954	0.58255	0.335189	0.613564	0.561616	0.363716	0.57515	0.453853	0.552135	0.573575	0.611367	0.62224
Cell_0166	TFEB_TR	Glucose 17 mM + Glutamine 2.500000e-01 mM + Insulin 10000 ng/ml	2.40415	3.22504	1.00012	1.32532	1.40264	0.827091	1.8334	0.659789	1.54288	1.40148	1.57065	1.03468	2.35245	2.16139	0.896746	1.48835	1.09425	1.03886	0.686025	0.786059	1.16	1.06093	1.90766	1.27612	0.755477	1.28855	1.04439	2.25924	1.1234	1.26369	0.99866	0.956442	2.27052	0.510839	2.30621	1.78406	1.78539	1.60024	1.38991	0.844272	1.71105	0.70683	2.0539	0.960789	1.18339	3.21123	1.01219
Cell_0166	FOXO_TR	Glucose 17 mM + Glutamine 2.500000e-01 mM + Insulin 10000 ng/ml	3.15635	3.2331	1.08439	1.33352	1.10365	3.06539	2.92979	0.922667	2.48538	1.26006	1.75739	2.62925	3.33	2.28955	1.07269	1.29674	1.99404	2.27514	2.17296	1.34672	1.21766	2.46989	2.10852	1.81779	2.1597	1.04634	2.49617	3.68752	1.3242	1.53491	0.92753	1.68765	2.51624	0.993494	2.12448	1.46004	3.14572	2.07829	2.42956	1.98336	1.18392	1.21088	2.58541	2.0764	2.7568	1.46374	0.995865
Cell_0166	AMPKARt2	Glucose 17 mM + Glutamine 2.500000e-01 mM + Insulin 10000 ng/ml	0.363017	0.523433	0.387877	0.585312	0.492736	0.473731	0.509292	0.447141	0.425525	0.606651	0.618267	0.523252	0.566491	0.642161	0.530472	0.598105	0.677121	0.718199	0.641334	0.624758	0.535077	0.486951	0.417595	0.527125	0.610934	0.551691	0.498898	0.526744	0.489283	0.537731	0.712119	0.533433	0.513349	0.52762	0.498859	0.457941	0.551349	0.31783	0.629597	0.546908	0.350843	0.589327	0.451262	0.573132	0.571209	0.617815	0.633828
Cell_0167	TFEB_TR	Glucose 17 mM + Glutamine 2.500000e-01 mM + Insulin 10000 ng/ml	2.34387	3.14915	1.01432	1.08516	1.31227	0.897066	1.80462	0.675527	1.59808	1.2659	1.71776	1.02587	0.845487	2.00259	0.898913	1.50473	1.14283	1.10669	0.679009	0.741401	1.19342	0.974174	2.01553	1.29171	0.741427	1.37309	1.07038	2.41537	1.12096	1.23514	0.867524	0.94565	2.05793	0.513139	2.35863	1.67854	1.60916	1.60656	1.10923	1.05618	1.52755	0.753654	2.02813	1.08531	1.27031	3.29341	1.1266
Cell_0167	FOXO_TR	Glucose 17 mM + Glutamine 2.500000e-01 mM + Insulin 10000 ng/ml	3.018	3.25349	1.09848	1.33254	1.0934	2.98694	2.84002	0.917776	2.36556	1.24089	2.8743	2.59784	1.15224	2.19071	1.05019	1.30308	2.01252	2.18775	2.18345	1.28266	1.24335	2.41017	2.09088	1.83754	1.74601	1.00329	2.55889	3.63507	1.31457	1.53589	0.911174	1.72265	2.30514	1.00331	1.97862	1.46403	3.24411	2.11181	2.44721	1.92482	1.13893	1.72047	2.57899	1.34186	2.66944	1.44724	0.997346
Cell_0167	AMPKARt2	Glucose 17 mM + Glutamine 2.500000e-01 mM + Insulin 10000 ng/ml	0.36875	0.538257	0.38103	0.574666	0.491052	0.449613	0.508279	0.448896	0.439955	0.607223	0.571528	0.51071	0.51415	0.611052	0.527334	0.61674	0.700201	0.709448	0.636692	0.634569	0.523751	0.486369	0.404647	0.529219	0.607849	0.544889	0.497791	0.512942	0.487025	0.547224	0.721367	0.528252	0.501634	0.539596	0.517208	0.465918	0.568128	0.330257	0.62076	0.520039	0.367626	0.590177	0.450974	0.55961	0.543192	0.609892	0.645416
Cell_0168	TFEB_TR	Glucose 17 mM + Glutamine 2.500000e-01 mM + Insulin 10000 ng/ml	2.3038	3.19104	1.03477	1.01019	1.34492	0.912239	1.83717	0.689279	1.59845	1.09996	1.7587	1.04996	0.907801	2.01347	0.875723	1.53702	0.999897	1.3661	0.706125	0.693415	1.21303	0.900458	1.89951	1.30977	0.729744	1.1373	1.1784	2.24536	1.12237	1.30389	0.999014	0.997119	1.94735	0.526308	2.11577	1.63454	1.4632	2.11158	0.841278	1.18377	1.60839	0.79495	2.00365	1.05132	1.47917	2.68668	1.23076
Cell_0168	FOXO_TR	Glucose 17 mM + Glutamine 2.500000e-01 mM + Insulin 10000 ng/ml	3.05584	3.31974	1.09765	1.31954	1.09665	2.78687	2.97525	0.902919	2.12988	1.18357	3.50975	2.61282	1.10134	2.06513	1.02698	1.61927	1.99749	2.1277	2.26458	1.23142	1.21172	2.33632	2.11574	1.86258	1.53827	1.04217	2.66352	3.48901	1.31246	1.49279	0.93544	1.84707	2.18463	1.03306	1.83048	1.46756	3.2573	2.2267	2.41543	1.83372	1.15483	2.00086	2.6005	1.38409	2.54906	1.3975	1.44999
Cell_0168	AMPKARt2	Glucose 17 mM + Glutamine 2.500000e-01 mM + Insulin 10000 ng/ml	0.402417	0.52795	0.380462	0.55187	0.492801	0.453553	0.499306	0.4597	0.430001	0.586339	0.499412	0.490975	0.507966	0.596832	0.528744	0.617485	0.728159	0.698422	0.630086	0.647315	0.523068	0.475641	0.422754	0.530853	0.596867	0.542036	0.491232	0.510162	0.482909	0.549919	0.722158	0.502309	0.49637	0.562822	0.529189	0.460691	0.584331	0.336221	0.616991	0.523579	0.435821	0.57318	0.452771	0.569166	0.490756	0.605896	0.646966
Cell_0169	TFEB_TR	Glucose 17 mM + Glutamine 2.500000e-01 mM + Insulin 10000 ng/ml	2.27499	3.49155	1.03885	1.13017	1.48083	0.914817	1.87481	0.700629	1.66042	0.988063	1.77525	1.06492	0.798903	2.22586	0.85831	1.67781	1.01652	1.24377	0.729039	0.734607	1.15589	0.984757	1.79492	1.30883	0.750904	1.14741	1.1928	2.09806	1.13368	1.3168	1.16275	1.06334	1.75671	0.525456	1.96734	1.55179	1.60976	2.45844	0.86139	1.15442	1.75753	0.823734	1.97598	1.0836	1.41424	2.86189	1.25444
Cell_0169	FOXO_TR	Glucose 17 mM + Glutamine 2.500000e-01 mM + Insulin 10000 ng/ml	3.33373	3.30283	1.11659	1.32498	1.12322	2.80324	3.07448	0.913439	1.89295	1.18756	3.48233	2.60051	1.03325	1.97934	1.01233	2.21586	1.98697	1.67338	2.33903	1.23957	1.17611	2.29175	2.12899	1.81035	1.4748	1.17442	2.65195	3.44182	1.32156	1.43642	0.933787	1.97962	2.02825	1.03947	1.7284	1.41175	3.22149	2.2741	2.33029	1.73396	1.17862	1.91409	2.5521	1.43209	2.50199	1.33098	2.3032
Cell_0169	AMPKARt2	Glucose 17 mM + Glutamine 2.500000e-01 mM + Insulin 10000 ng/ml	0.448069	0.524658	0.383699	0.523809	0.505725	0.454711	0.502416	0.463017	0.406504	0.607434	0.473707	0.478596	0.503066	0.593296	0.543825	0.597918	0.714718	0.686173	0.622293	0.651396	0.537532	0.459953	0.444089	0.517011	0.592068	0.548258	0.487237	0.519111	0.488501	0.565258	0.714658	0.489314	0.497351	0.570098	0.522906	0.467927	0.563798	0.326475	0.626472	0.527436	0.481385	0.564272	0.458732	0.572911	0.438982	0.611468	0.625489
Cell_0170	TFEB_TR	Glucose 17 mM + Glutamine 2.500000e-01 mM + Insulin 10000 ng/ml	2.22516	3.67672	1.04502	0.960883	1.47005	0.962056	1.83482	0.694287	1.70077	0.894553	2.00047	1.06445	0.853633	2.4765	0.858091	1.70294	1.34369	1.29488	0.717556	0.744624	1.2195	1.09516	1.75696	1.31109	0.791245	1.40038	1.19144	2.16188	1.13078	1.10258	1.0593	1.07641	1.59297	0.514528	2.17905	1.52982	1.65656	2.19584	1.06506	1.23834	1.60196	0.814405	1.97904	1.08584	1.26699	3.1738	1.37826
Cell_0170	FOXO_TR	Glucose 17 mM + Glutamine 2.500000e-01 mM + Insulin 10000 ng/ml	3.60931	3.24911	1.14305	1.34937	1.15272	2.87066	2.92785	0.91085	1.68087	1.22669	3.45321	2.5377	1.022	1.90977	1.00629	2.59264	1.96094	1.56784	2.28508	1.24904	1.5608	2.29897	2.1253	1.72365	1.40329	1.21574	2.71677	3.51564	1.32278	1.40888	0.875828	2.04161	1.90406	1.01771	1.72034	1.35368	3.21031	2.24413	2.29316	1.67683	1.14048	1.78452	2.56517	1.42473	2.47534	1.30329	2.70447
Cell_0170	AMPKARt2	Glucose 17 mM + Glutamine 2.500000e-01 mM + Insulin 10000 ng/ml	0.482404	0.542587	0.386653	0.493164	0.517395	0.455127	0.507071	0.457477	0.417154	0.638388	0.496735	0.473404	0.512485	0.58764	0.55528	0.571938	0.677827	0.671255	0.614943	0.644953	0.547114	0.459997	0.449873	0.523054	0.597562	0.557982	0.477872	0.516215	0.48864	0.573948	0.720056	0.486828	0.502459	0.555744	0.506783	0.485103	0.563221	0.316682	0.633228	0.51273	0.473935	0.562056	0.455798	0.566747	0.408601	0.623283	0.604338
Cell_0171	TFEB_TR	Glucose 17 mM + Glutamine 2.500000e-01 mM + Insulin 10000 ng/ml	2.08896	3.62192	1.02933	0.852213	1.48316	0.984592	1.76309	0.699761	1.59283	0.815625	2.11801	1.07872	1.08829	2.82256	0.840287	1.62013	1.27594	1.29431	0.744274	0.698829	1.38522	1.08319	1.09972	1.30764	0.767403	1.54787	1.32084	2.34933	1.11016	1.04072	1.02253	1.08531	1.57712	0.515978	2.31543	1.48244	1.55503	1.83141	1.39695	1.23308	1.33043	0.823888	2.06709	1.11896	1.28519	2.59593	1.55837
Cell_0171	FOXO_TR	Glucose 17 mM + Glutamine 2.500000e-01 mM + Insulin 10000 ng/ml	3.64772	3.32928	1.11805	1.34531	1.15972	2.8899	2.73436	0.929519	1.49389	1.22584	3.45079	2.47018	1.05761	1.82305	0.988972	2.57697	1.91522	1.54072	2.19576	1.25745	2.15397	2.29192	1.30068	1.66385	1.3391	1.20608	2.91487	3.58008	1.30358	1.37249	0.857852	2.09599	1.92282	1.02588	1.69784	1.33516	3.2216	2.26506	2.32214	1.62684	1.10168	1.79942	2.65503	1.39817	2.39886	1.30202	2.53353
Cell_0171	AMPKARt2	Glucose 17 mM + Glutamine 2.500000e-01 mM + Insulin 10000 ng/ml	0.490205	0.546691	0.390422	0.48099	0.519916	0.468443	0.499233	0.457489	0.430747	0.636927	0.522745	0.467458	0.529339	0.584907	0.554601	0.554555	0.669751	0.677187	0.613099	0.648875	0.523075	0.471243	0.575938	0.529652	0.603625	0.569031	0.469549	0.508711	0.481583	0.558082	0.722085	0.491583	0.510036	0.549258	0.501995	0.485128	0.579194	0.306319	0.641377	0.519935	0.473846	0.547271	0.444722	0.558233	0.401946	0.637663	0.607508
Cell_0172	TFEB_TR	Glucose 17 mM + Glutamine 2.500000e-01 mM + Insulin 10000 ng/ml	1.98968	3.36349	0.977563	0.971277	1.64207	0.946311	1.72806	0.730698	1.51585	0.923578	1.95484	1.11343	1.09996	3.16841	0.815407	1.82758	0.822461	1.264	0.839836	0.719373	1.3778	1.15078	1.26928	1.3001	0.735038	1.51819	1.37834	2.58672	1.10417	1.20315	1.11833	1.15796	1.49311	0.528229	2.17164	1.37171	1.59515	1.74352	1.58274	1.20611	1.32643	0.880543	2.13298	1.1721	1.34532	2.31849	1.55088
Cell_0172	FOXO_TR	Glucose 17 mM + Glutamine 2.500000e-01 mM + Insulin 10000 ng/ml	3.5663	3.34746	1.0738	1.31704	1.19257	2.85533	2.63281	0.99587	1.36394	1.20727	3.36639	2.48647	1.07374	1.7384	0.952483	2.49691	1.92359	1.55765	2.16974	1.31933	2.29328	2.26548	1.34498	1.61916	1.33222	1.43825	2.96312	3.66593	1.28413	1.26721	0.860204	2.15592	1.89141	1.06274	1.58049	1.32656	3.18589	2.23196	2.28875	1.52836	1.08991	1.88877	2.6567	1.35771	2.3099	1.26316	2.47883
Cell_0172	AMPKARt2	Glucose 17 mM + Glutamine 2.500000e-01 mM + Insulin 10000 ng/ml	0.466811	0.535298	0.382343	0.495454	0.527738	0.471087	0.506498	0.457133	0.430233	0.626255	0.535881	0.480167	0.529587	0.586439	0.555278	0.546379	0.681383	0.6854	0.611059	0.656865	0.500689	0.473496	0.581218	0.501604	0.597775	0.58465	0.468847	0.513304	0.49473	0.555212	0.703094	0.505001	0.520738	0.559709	0.5002	0.485712	0.569472	0.303456	0.64203	0.535499	0.481531	0.532646	0.449252	0.56142	0.415556	0.63934	0.612764
Cell_0173	TFEB_TR	Glucose 17 mM + Glutamine 2.500000e-01 mM + Insulin 10000 ng/ml	2.06516	3.00501	0.980108	0.95555	1.55609	0.929672	1.66449	0.752383	1.60543	1.02858	1.88419	1.11194	0.970315	3.18252	0.823854	2.11888	0.898229	1.25018	0.932234	0.743001	1.28976	1.2574	1.40301	1.32889	0.764859	1.19286	1.2897	0.845097	1.12433	1.18207	1.20808	1.20691	1.40001	0.541756	2.17821	1.39468	1.72654	1.82891	1.42892	1.36444	1.43893	0.89521	2.06607	1.15904	1.36168	2.67076	1.66933
Cell_0173	FOXO_TR	Glucose 17 mM + Glutamine 2.500000e-01 mM + Insulin 10000 ng/ml	3.54268	3.20525	1.08103	1.29494	1.22349	2.8289	2.54842	1.0392	1.26804	1.17819	3.43568	2.49824	1.08242	1.67297	0.937395	2.53444	1.99948	1.5366	2.1033	1.35155	2.10811	2.28451	1.38668	1.55675	1.36374	1.9169	2.85645	1.60984	1.2954	1.17132	0.846671	2.17622	1.82425	1.08397	1.51066	1.35587	3.15485	2.14205	2.21215	1.45768	1.06373	1.95897	2.62792	1.32061	2.30565	1.22023	2.63742
Cell_0173	AMPKARt2	Glucose 17 mM + Glutamine 2.500000e-01 mM + Insulin 10000 ng/ml	0.442003	0.537326	0.372625	0.529182	0.537178	0.460748	0.533488	0.462184	0.422292	0.630567	0.543651	0.50551	0.517955	0.587328	0.563245	0.538693	0.679497	0.680792	0.602947	0.654818	0.526372	0.47069	0.588287	0.47451	0.591308	0.586781	0.470428	0.655864	0.494771	0.574672	0.699072	0.497489	0.539972	0.562614	0.481952	0.495456	0.556817	0.311443	0.6317	0.5178	0.475249	0.532524	0.463468	0.572017	0.428939	0.626725	0.600504
Cell_0174	TFEB_TR	Glucose 17 mM + Glutamine 2.500000e-01 mM + Insulin 10000 ng/ml	2.14263	3.61762	1.05222	0.937599	1.26596	0.942182	1.51457	0.742459	1.678	0.8597	1.93198	1.05986	1.01752	3.0218	0.831646	2.08671	1.26558	1.24371	1.00455	0.690913	1.33396	1.1414	1.32574	1.38471	0.768452	0.94075	1.29446	0.817604	1.13829	1.08603	1.38513	1.17954	1.49387	0.548094	2.29123	1.50523	1.81117	2.01626	1.18533	1.40271	1.30583	0.882793	2.05021	1.26061	1.33084	2.49031	2.05984
Cell_0174	FOXO_TR	Glucose 17 mM + Glutamine 2.500000e-01 mM + Insulin 10000 ng/ml	3.555	3.34267	1.12047	1.29849	1.12338	2.87022	2.45191	1.01853	1.19215	1.15501	3.45846	2.392	1.12102	1.61703	0.935595	2.55428	2.04292	1.48525	2.00405	1.27768	2.06532	2.35126	1.39729	1.4644	1.36287	2.38425	2.82283	1.71018	1.31471	1.19233	1.04257	2.22534	1.88305	1.09695	1.52731	1.32435	3.15502	2.18633	2.28509	1.45444	1.10329	2.01187	2.70667	1.38472	2.39451	1.2435	2.68012
Cell_0174	AMPKARt2	Glucose 17 mM + Glutamine 2.500000e-01 mM + Insulin 10000 ng/ml	0.443661	0.546217	0.388172	0.568038	0.532627	0.456233	0.549966	0.468233	0.402271	0.645758	0.541426	0.508505	0.517827	0.581388	0.570338	0.533026	0.675682	0.67554	0.594016	0.660418	0.552624	0.474044	0.582562	0.463151	0.593532	0.576746	0.472824	0.64012	0.436873	0.577377	0.718947	0.478507	0.554433	0.560677	0.465612	0.501275	0.545632	0.317029	0.638527	0.503137	0.479235	0.536647	0.467786	0.580041	0.425512	0.632173	0.59349
Cell_0175	TFEB_TR	Glucose 17 mM + Glutamine 2.500000e-01 mM + Insulin 10000 ng/ml	2.13216	2.33925	1.0801	1.06093	1.33355	0.934398	1.41652	0.712271	1.64341	0.72543	1.86707	1.04342	1.0973	3.05066	0.800994	2.03148	1.11977	1.14902	1.08714	0.651564	1.35462	1.1326	1.07964	1.44816	0.725906	1.20759	1.34546	0.878581	1.14048	1.15565	1.50102	1.19843	0.634387	0.546718	2.13665	1.55848	1.77142	2.08061	1.08022	1.33283	1.14389	0.940299	2.17319	1.35353	1.28029	2.01668	2.10598
Cell_0175	FOXO_TR	Glucose 17 mM + Glutamine 2.500000e-01 mM + Insulin 10000 ng/ml	3.51966	2.32092	1.14469	1.29885	1.11042	2.89104	2.49893	0.956778	1.16418	1.17886	3.23741	2.39297	1.1842	1.56358	0.893566	2.4824	2.01614	1.45325	1.96699	1.21342	2.12769	2.48179	1.35295	1.37818	1.34833	2.6332	2.8431	1.77051	1.29004	1.24153	1.52774	2.28083	1.19817	1.11366	1.48604	1.28	3.16352	2.22387	2.42053	1.43644	1.20994	2.11731	2.80612	1.38776	2.44333	1.24499	2.65932
Cell_0175	AMPKARt2	Glucose 17 mM + Glutamine 2.500000e-01 mM + Insulin 10000 ng/ml	0.45028	0.633547	0.420866	0.584022	0.537831	0.451746	0.554505	0.452807	0.418455	0.642331	0.529713	0.499725	0.521664	0.569368	0.573343	0.526816	0.687749	0.681505	0.589544	0.672252	0.544068	0.475787	0.575471	0.439746	0.597348	0.583078	0.478603	0.639591	0.379051	0.573285	0.712357	0.49023	0.650327	0.561961	0.470284	0.508308	0.520612	0.325222	0.654916	0.519357	0.475847	0.53971	0.46703	0.591138	0.425484	0.654389	0.604234
Cell_0176	TFEB_TR	Glucose 17 mM + Glutamine 2.500000e-01 mM + Insulin 10000 ng/ml	2.19034	2.66045	1.06274	1.08951	1.73534	0.949806	1.47202	0.712514	1.60984	0.85788	1.81195	1.077	1.07533	3.11531	0.7759	2.02093	0.850615	1.02511	1.14319	0.637775	1.28109	1.37631	1.00799	1.55213	0.742968	1.25298	1.31173	0.878258	1.1803	1.15554	1.52588	1.24469	0.605788	0.552904	2.0642	1.65967	1.58487	1.95467	1.29924	1.4717	1.31618	1.01049	2.19989	1.16214	1.30711	1.7983	1.81176
Cell_0176	FOXO_TR	Glucose 17 mM + Glutamine 2.500000e-01 mM + Insulin 10000 ng/ml	3.45515	2.46759	1.1465	1.24196	1.52928	2.83509	2.7414	0.917513	1.168	1.16282	3.16542	2.56258	1.21886	1.52829	0.87009	2.45391	2.01175	1.44396	1.93172	1.22912	2.24547	2.55729	1.29619	1.34148	1.37251	2.60171	2.90204	1.78982	1.24088	1.20593	1.93178	2.24624	1.1994	1.11806	1.411	1.71361	3.15589	2.13505	2.45463	1.40453	1.17512	2.23703	2.84717	1.30781	2.39335	1.1728	2.6545
Cell_0176	AMPKARt2	Glucose 17 mM + Glutamine 2.500000e-01 mM + Insulin 10000 ng/ml	0.446041	0.628359	0.424293	0.577217	0.5641	0.449138	0.560471	0.456437	0.483849	0.617072	0.52591	0.511364	0.516276	0.57009	0.576363	0.515495	0.704464	0.692254	0.590745	0.670563	0.536619	0.476583	0.571035	0.420669	0.602079	0.589618	0.481455	0.659219	0.369151	0.585071	0.675817	0.501988	0.657534	0.549242	0.481028	0.481822	0.517354	0.334416	0.643172	0.52561	0.465441	0.543951	0.4603	0.599008	0.443612	0.647516	0.602097
Cell_0177	TFEB_TR	Glucose 17 mM + Glutamine 2.500000e-01 mM + Insulin 10000 ng/ml	2.27092	2.60517	1.07948	1.03864	1.99392	1.00206	1.10062	0.761981	1.59102	0.978011	1.83578	1.08085	1.13642	3.19504	0.782577	1.87265	0.950328	1.08542	1.15731	0.633457	1.29876	1.30648	1.22907	1.67952	0.796819	0.939506	1.37025	0.949118	1.25531	1.05005	1.62175	1.18912	0.632093	0.567039	2.29648	1.82632	1.54239	0.673875	1.82174	1.58844	1.52092	1.02075	2.17839	1.13581	1.37893	1.52059	1.8552
Cell_0177	FOXO_TR	Glucose 17 mM + Glutamine 2.500000e-01 mM + Insulin 10000 ng/ml	3.43724	2.43888	1.12961	1.18832	2.07034	2.8059	1.81124	0.973262	1.1779	1.1708	3.2478	2.57117	1.22539	1.52111	0.902077	2.52147	2.03999	1.449	1.86422	1.2452	2.44823	2.41898	1.28792	1.33261	1.3583	2.56771	3.03815	1.80775	1.21124	1.18331	2.07818	2.21677	1.21436	1.11957	1.39633	2.61097	3.10369	1.80882	2.61028	1.4191	1.09002	2.27359	2.88889	1.5836	2.3368	1.15199	2.52255
Cell_0177	AMPKARt2	Glucose 17 mM + Glutamine 2.500000e-01 mM + Insulin 10000 ng/ml	0.449578	0.632426	0.382536	0.577703	0.564161	0.448584	0.623609	0.505461	0.512134	0.620702	0.526174	0.537723	0.526375	0.582814	0.579378	0.51585	0.714096	0.693601	0.597651	0.665778	0.531651	0.483036	0.565235	0.41849	0.603803	0.580671	0.480282	0.674264	0.360635	0.584957	0.657178	0.48295	0.661121	0.533302	0.486738	0.401073	0.539979	0.556622	0.614895	0.525993	0.494532	0.544779	0.448998	0.590685	0.454946	0.621268	0.57607
Cell_0178	TFEB_TR	Glucose 17 mM + Glutamine 2.500000e-01 mM + Insulin 10000 ng/ml	2.27663	2.45747	1.1529	1.03358	1.98461	1.02163	1.1964	0.765218	1.52613	0.938755	1.88438	1.06309	1.21163	3.57002	0.786516	1.92733	1.09542	1.20826	1.19895	0.678925	1.35672	1.02779	1.40349	1.75995	0.788034	1.2319	1.45772	1.08318	1.30727	1.10662	1.50579	1.15081	0.678393	0.57147	2.29166	1.88603	1.7769	0.671167	1.98521	1.54491	1.45825	1.01544	2.30378	1.46211	1.39663	1.34131	2.06632
Cell_0178	FOXO_TR	Glucose 17 mM + Glutamine 2.500000e-01 mM + Insulin 10000 ng/ml	3.46466	2.40784	1.1122	1.1973	2.24848	2.85059	1.77836	1.0484	1.16565	1.52129	3.14588	2.45533	1.28614	1.52281	0.870315	2.53048	1.99459	1.44626	1.84395	1.27446	2.52332	2.30074	1.30863	1.31996	1.28603	2.76106	3.06041	1.87769	1.181	1.23926	2.18795	2.22664	1.22019	1.12792	1.39479	3.1593	3.13934	1.77637	2.8907	1.44367	1.37554	2.24832	2.91403	2.07427	2.30325	1.14893	2.35336
Cell_0178	AMPKARt2	Glucose 17 mM + Glutamine 2.500000e-01 mM + Insulin 10000 ng/ml	0.459028	0.640602	0.349684	0.593129	0.523762	0.435214	0.612032	0.525722	0.493734	0.63787	0.51295	0.560127	0.555422	0.574352	0.58264	0.527681	0.716557	0.692041	0.605522	0.661763	0.519638	0.480847	0.578075	0.405509	0.598148	0.589645	0.489088	0.669394	0.342672	0.576016	0.666466	0.477555	0.667575	0.537391	0.493468	0.337386	0.54426	0.553281	0.601046	0.549574	0.482951	0.545708	0.459155	0.57899	0.443134	0.628247	0.56247
Cell_0179	TFEB_TR	Glucose 17 mM + Glutamine 2.500000e-01 mM + Insulin 10000 ng/ml	2.30022	2.56585	1.25764	1.03182	1.92278	1.02498	1.26829	0.694141	1.45629	0.896908	2.01859	1.19304	1.11244	3.89266	0.786243	2.06372	1.13495	1.19552	1.26907	0.706708	1.31838	1.05159	1.26393	1.81216	0.749661	1.49137	1.32073	1.0286	1.3598	1.20974	1.24941	1.22854	0.673904	0.568758	2.02889	1.87067	1.83612	0.709292	1.55393	1.52061	1.39819	0.997437	0.600002	1.57157	1.35071	1.45349	1.97865
Cell_0179	FOXO_TR	Glucose 17 mM + Glutamine 2.500000e-01 mM + Insulin 10000 ng/ml	3.46442	2.42486	1.10682	1.18747	2.23582	2.87124	1.75604	1.02669	1.11875	2.07239	3.16863	1.35497	1.38248	1.50615	0.85396	2.45943	1.94263	1.42651	1.86258	1.33187	2.43526	2.40301	1.28991	1.31069	1.2677	2.88034	2.94504	1.92434	1.15158	1.23396	2.26486	2.14567	1.22141	1.11585	1.37353	3.10012	3.30892	1.81622	2.88632	1.42856	1.94571	2.20923	1.55147	2.14334	2.23579	1.13204	2.40458
Cell_0179	AMPKARt2	Glucose 17 mM + Glutamine 2.500000e-01 mM + Insulin 10000 ng/ml	0.457103	0.636966	0.353249	0.611182	0.493563	0.435615	0.618621	0.489161	0.498389	0.594367	0.500077	0.656045	0.55254	0.54539	0.589267	0.519262	0.715434	0.698387	0.604606	0.650919	0.518162	0.475214	0.591376	0.389099	0.599858	0.604416	0.510026	0.664252	0.35001	0.587894	0.684453	0.490271	0.674103	0.541942	0.501494	0.305286	0.532506	0.57592	0.59476	0.556643	0.352979	0.557996	0.557621	0.563652	0.43093	0.663281	0.570216
Cell_0180	TFEB_TR	Glucose 17 mM + Glutamine 2.500000e-01 mM + Insulin 10000 ng/ml	2.29185	2.77169	1.26926	1.03996	1.99332	1.05104	1.31851	0.677269	1.47393	0.939946	2.08135	1.29716	1.06737	3.80777	0.823633	1.91406	1.20032	1.24061	1.30244	0.709965	1.31566	1.05605	1.06683	1.89385	0.742549	1.07155	1.17069	0.957879	1.46232	1.1033	1.42022	1.23469	0.669083	0.575175	2.02442	1.92326	1.67464	0.756559	1.35771	1.35168	1.45229	0.974544	0.624927	1.58726	1.30901	1.83704	1.89591
Cell_0180	FOXO_TR	Glucose 17 mM + Glutamine 2.500000e-01 mM + Insulin 10000 ng/ml	3.42902	2.42127	1.08716	1.16327	2.29589	2.8233	1.71929	0.984443	1.11076	2.2709	3.48341	1.38224	1.43585	1.46986	1.09158	2.48407	2.05808	1.44059	1.83633	1.30676	2.41955	2.50961	1.2454	1.30281	1.30585	2.83817	2.93415	1.86135	1.16234	1.1579	2.18647	2.03882	1.26386	1.07731	1.35306	2.98384	3.38681	1.90126	2.69679	1.40622	2.24274	2.19637	1.63874	1.95967	2.16035	1.46598	2.61826
Cell_0180	AMPKARt2	Glucose 17 mM + Glutamine 2.500000e-01 mM + Insulin 10000 ng/ml	0.450114	0.632207	0.348083	0.613263	0.488535	0.46533	0.63119	0.45359	0.517874	0.524371	0.501943	0.666318	0.510965	0.537187	0.595984	0.497401	0.710617	0.692543	0.596564	0.655216	0.511641	0.491106	0.579855	0.388914	0.606598	0.585136	0.531277	0.657724	0.361784	0.594868	0.699644	0.488294	0.674546	0.528171	0.501995	0.273164	0.527549	0.587891	0.589713	0.539417	0.246982	0.566553	0.553523	0.520966	0.431216	0.684469	0.568683
Cell_0181	TFEB_TR	Glucose 17 mM + Glutamine 2.500000e-01 mM + Insulin 10000 ng/ml	2.22668	2.82942	1.18565	1.03711	2.12004	1.04094	1.39177	0.728362	1.52115	0.963252	1.94543	1.39492	1.20665	3.73106	0.904917	1.99678	0.985981	1.31974	1.33736	0.809264	1.39451	0.921174	1.11965	1.96806	0.740765	1.22842	1.19943	1.00987	1.55977	1.04666	1.75565	1.12495	0.72686	0.583797	2.18998	1.99372	1.90016	0.73922	1.69184	1.16885	1.5527	1.00854	0.628319	1.85685	1.4397	2.43324	2.02449
Cell_0181	FOXO_TR	Glucose 17 mM + Glutamine 2.500000e-01 mM + Insulin 10000 ng/ml	3.40199	2.46414	1.05221	1.18916	2.30533	2.78069	1.67939	0.981114	1.12973	2.1163	3.5548	1.40475	1.46148	1.45614	1.40677	2.60081	1.56431	1.48696	1.79985	1.3699	2.48583	2.59721	1.25741	1.29131	1.31909	2.99156	2.9304	1.81873	1.17366	1.19262	2.09598	2.01488	1.3062	1.04619	1.36725	3.03939	3.40395	1.89762	2.69084	1.41244	2.23006	2.23659	1.56618	1.91238	2.15397	2.20394	2.73937
Cell_0181	AMPKARt2	Glucose 17 mM + Glutamine 2.500000e-01 mM + Insulin 10000 ng/ml	0.445996	0.641443	0.328127	0.591329	0.482448	0.472356	0.631046	0.436378	0.518995	0.512905	0.506454	0.661344	0.491475	0.561189	0.599542	0.49885	0.656132	0.667038	0.600145	0.674518	0.502192	0.509494	0.579762	0.38343	0.600542	0.568665	0.549176	0.645524	0.351989	0.579334	0.703447	0.495989	0.679295	0.515083	0.494275	0.286432	0.525021	0.568352	0.598088	0.552205	0.253403	0.55109	0.559227	0.47936	0.425096	0.678341	0.559112
Cell_0182	TFEB_TR	Glucose 17 mM + Glutamine 2.500000e-01 mM + Insulin 10000 ng/ml	2.29126	2.78342	1.22697	0.984017	2.22335	1.00644	1.37771	0.751612	1.46648	0.872519	1.87858	1.26679	1.28414	3.79176	0.978075	2.37996	1.10602	1.2114	1.40291	0.940518	1.39494	1.06706	1.17389	1.98733	0.723692	1.7211	1.1366	1.02796	1.5981	1.27042	1.74784	1.09188	0.764017	0.579853	2.25006	2.03074	2.28823	0.67995	1.74881	1.37424	1.81651	1.03247	0.650347	1.91604	1.69101	2.54347	2.11331
Cell_0182	FOXO_TR	Glucose 17 mM + Glutamine 2.500000e-01 mM + Insulin 10000 ng/ml	3.33711	2.5216	1.04356	1.16542	2.28031	2.77883	1.64933	0.954727	1.06912	1.97397	3.34702	1.41317	1.44737	1.47814	1.48851	2.64721	1.55028	1.49245	1.81607	1.84982	2.44618	2.80927	1.30733	1.27828	1.28689	3.20673	2.6877	1.85035	1.14148	1.32301	2.06825	2.00049	1.2871	1.03364	1.42046	3.07335	3.51552	1.84824	2.63626	1.41585	2.28865	2.21748	1.57114	1.73514	2.17481	2.69801	2.70516
Cell_0182	AMPKARt2	Glucose 17 mM + Glutamine 2.500000e-01 mM + Insulin 10000 ng/ml	0.445496	0.64337	0.325317	0.582258	0.484643	0.450299	0.627877	0.428548	0.514987	0.543374	0.508759	0.663644	0.504599	0.587853	0.600938	0.512283	0.653142	0.645261	0.613848	0.671401	0.525968	0.505923	0.589774	0.370417	0.60575	0.586697	0.555247	0.668348	0.34304	0.572196	0.699866	0.520295	0.68062	0.51993	0.494889	0.309927	0.525135	0.558089	0.607041	0.578185	0.256349	0.535478	0.576594	0.486984	0.41309	0.661001	0.558678
Cell_0183	TFEB_TR	Glucose 17 mM + Glutamine 2.500000e-01 mM + Insulin 10000 ng/ml	2.3438	2.80156	1.34826	0.975426	2.49009	1.02416	1.26497	0.789525	1.38015	0.77553	1.9476	1.18275	1.35213	3.72132	0.99407	2.29989	1.12386	1.17946	1.41755	1.03865	1.36001	1.23571	1.00086	1.96532	0.685461	1.30052	0.979182	1.0423	1.61134	1.35369	1.65787	1.13252	0.776607	0.57821	2.23748	2.01046	2.12878	0.677556	1.25038	1.51933	2.02512	0.988493	0.673035	1.8345	1.70003	2.20805	2.12466
Cell_0183	FOXO_TR	Glucose 17 mM + Glutamine 2.500000e-01 mM + Insulin 10000 ng/ml	3.20765	2.51549	1.05953	1.08737	2.41114	2.76731	1.61446	0.945944	1.02115	1.85235	3.29719	1.40629	1.36952	1.47353	1.46614	2.62791	1.55385	1.45387	1.79098	2.4776	2.3246	2.43406	1.33029	1.24693	1.27557	3.1474	2.48035	1.81315	1.12147	1.35597	2.01429	1.99786	1.28617	1.01903	1.41763	3.05976	3.53221	1.93664	2.31452	1.39231	2.40213	2.11289	1.69222	1.42058	2.14005	2.70644	2.61391
Cell_0183	AMPKARt2	Glucose 17 mM + Glutamine 2.500000e-01 mM + Insulin 10000 ng/ml	0.45431	0.633713	0.323111	0.605059	0.503275	0.446461	0.63592	0.429715	0.516389	0.560964	0.505535	0.674225	0.506315	0.597405	0.599266	0.508662	0.651235	0.629647	0.612592	0.651117	0.549218	0.651031	0.563456	0.374177	0.631448	0.594192	0.545231	0.699821	0.346223	0.571366	0.698924	0.530234	0.66422	0.531057	0.512342	0.274559	0.527772	0.57364	0.595448	0.570078	0.226802	0.537101	0.586479	0.497256	0.416527	0.657964	0.553834
Cell_0184	TFEB_TR	Glucose 17 mM + Glutamine 2.500000e-01 mM + Insulin 10000 ng/ml	2.15345	2.93499	1.3305	1.01125	2.80326	1.04431	1.30671	0.8727	1.3992	0.756259	1.90872	1.30408	1.51517	3.75771	0.961746	1.91814	1.13044	1.32329	1.40769	1.28354	1.43002	1.41007	0.916318	1.92115	0.628046	1.01668	1.0068	1.03186	1.64372	1.1313	1.64578	1.10784	0.860226	0.594562	2.17031	1.89325	1.83055	0.718184	0.957077	1.29152	1.92833	0.996179	0.654268	2.14068	1.47598	2.18765	2.10761
Cell_0184	FOXO_TR	Glucose 17 mM + Glutamine 2.500000e-01 mM + Insulin 10000 ng/ml	3.13895	2.49485	1.05772	1.10706	2.64786	2.72891	1.61168	0.973598	1.08598	1.72923	3.26823	1.41321	1.30021	1.44733	1.48171	2.63258	1.57056	1.42082	1.7178	2.71545	2.31849	2.42231	1.36956	1.20956	1.48716	3.03782	2.63402	1.74987	1.13546	1.26148	2.00527	2.04872	1.34298	0.99768	1.39814	3.02552	3.4712	2.08685	2.03972	1.3611	2.38427	2.11157	1.69589	1.35676	2.12453	2.69386	2.50471
Cell_0184	AMPKARt2	Glucose 17 mM + Glutamine 2.500000e-01 mM + Insulin 10000 ng/ml	0.460142	0.64225	0.319266	0.611504	0.502981	0.44964	0.643062	0.420202	0.520549	0.56354	0.49487	0.670462	0.506502	0.601644	0.597176	0.501287	0.655053	0.619036	0.600503	0.642776	0.526771	0.657014	0.518748	0.371609	0.622435	0.58265	0.547864	0.652756	0.348502	0.563765	0.693306	0.541454	0.665733	0.525187	0.527618	0.279778	0.528418	0.583784	0.580517	0.554928	0.225662	0.533294	0.576544	0.448711	0.42975	0.667649	0.542451
Cell_0185	TFEB_TR	Glucose 17 mM + Glutamine 2.500000e-01 mM + Insulin 10000 ng/ml	2.05642	3.07224	1.29231	1.01734	2.67159	1.02749	1.44019	0.903711	1.45855	0.700515	1.80956	1.21673	1.46505	3.93675	0.922893	1.87337	1.12764	1.32398	1.46125	1.62267	1.49968	1.3397	0.976283	1.88057	0.621878	1.52706	1.337	0.937969	1.70582	1.10358	1.62703	1.04186	0.912837	0.607934	2.20171	1.88866	1.86388	0.727327	1.20829	1.30049	1.84796	1.06192	0.659693	2.33214	1.40742	2.15775	2.09266
Cell_0185	FOXO_TR	Glucose 17 mM + Glutamine 2.500000e-01 mM + Insulin 10000 ng/ml	3.18158	2.50362	1.03057	1.13568	2.83105	2.74035	1.65496	0.940686	1.10834	1.74588	3.06185	1.44058	1.2552	1.47127	1.43626	2.64056	1.57266	1.40899	1.74017	2.60712	2.41224	2.40072	1.41342	1.1984	1.99984	3.10322	1.42138	1.80593	1.134	1.28102	2.08957	2.12546	1.37698	0.981273	1.44345	2.93029	3.53982	2.13308	1.97638	1.31243	2.30346	2.19809	1.65079	1.40821	2.18005	2.81742	2.40268
Cell_0185	AMPKARt2	Glucose 17 mM + Glutamine 2.500000e-01 mM + Insulin 10000 ng/ml	0.451753	0.65895	0.340394	0.594767	0.48018	0.440586	0.640434	0.408173	0.521816	0.568347	0.496244	0.667058	0.526734	0.605266	0.596857	0.507451	0.660234	0.624885	0.59599	0.637207	0.500907	0.657599	0.490473	0.336937	0.583792	0.592205	0.623032	0.582735	0.350758	0.579514	0.682154	0.561192	0.68808	0.510876	0.529472	0.349322	0.536109	0.592189	0.58262	0.562241	0.229834	0.52834	0.563666	0.399763	0.436326	0.66275	0.543387
Cell_0186	TFEB_TR	Glucose 17 mM + Glutamine 2.500000e-01 mM + Insulin 10000 ng/ml	2.25702	3.1784	1.35361	1.0675	2.30864	1.03266	1.3863	0.891377	1.46572	0.583091	1.83848	1.15947	1.29183	3.66578	0.905981	1.97895	1.09807	1.31345	1.50066	1.78499	1.49234	1.23161	0.899383	1.83645	0.685335	1.6685	1.08428	0.955493	1.7549	1.33457	1.75628	1.00419	0.85842	0.602966	2.32	2.05048	1.81222	0.713689	1.39756	1.49551	1.84069	1.05917	0.720834	1.9933	1.49882	2.30587	2.1705
Cell_0186	FOXO_TR	Glucose 17 mM + Glutamine 2.500000e-01 mM + Insulin 10000 ng/ml	3.23954	2.58427	1.00624	1.05814	2.89305	2.82624	1.66031	0.889396	1.05608	1.81485	2.97463	1.46394	1.19953	1.47178	1.39147	2.64426	1.57637	1.40443	1.77431	2.48339	2.44947	2.37712	1.34561	1.18078	2.47347	3.18792	1.40884	1.89391	1.12508	1.73329	2.11799	2.2609	1.40098	0.973915	1.40497	2.88849	3.51835	2.12812	1.98793	1.28026	2.19333	2.16808	1.71671	1.28416	2.17874	2.87309	2.43496
Cell_0186	AMPKARt2	Glucose 17 mM + Glutamine 2.500000e-01 mM + Insulin 10000 ng/ml	0.457101	0.648219	0.350202	0.612433	0.477462	0.438378	0.639967	0.41788	0.517839	0.583071	0.506266	0.677258	0.522996	0.595977	0.593555	0.514509	0.66217	0.629765	0.592928	0.625757	0.508926	0.658403	0.483925	0.321954	0.586734	0.601049	0.633729	0.58923	0.357842	0.601389	0.685866	0.561336	0.665478	0.524116	0.542628	0.360094	0.54363	0.621079	0.588101	0.572027	0.225294	0.539468	0.567008	0.409013	0.436306	0.6507	0.545583
Cell_0187	TFEB_TR	Glucose 17 mM + Glutamine 2.500000e-01 mM + Insulin 10000 ng/ml	1.14742	3.26838	1.38191	1.10149	2.43198	1.04493	1.25084	0.90876	1.49412	0.58211	1.88157	1.58801	1.41549	3.12031	0.914337	1.9845	1.08106	1.48469	1.46802	1.9621	1.5335	1.25448	0.861194	1.74677	0.732559	1.45649	1.13796	1.07907	1.74474	1.42317	1.88556	1.33	0.870809	0.600893	2.20088	2.02479	1.70028	0.677533	1.29213	1.3465	1.61931	1.02638	0.740455	1.72061	1.52273	3.29617	2.15419
Cell_0187	FOXO_TR	Glucose 17 mM + Glutamine 2.500000e-01 mM + Insulin 10000 ng/ml	1.96671	2.70274	1.00189	1.1507	2.85562	2.86279	1.60999	0.899562	1.0566	1.80619	3.04566	1.49728	1.17494	1.38359	1.43755	2.70577	1.58951	1.38247	1.70449	2.46385	2.46512	2.41596	1.21762	1.1335	2.59344	3.17123	1.41299	1.89007	1.12802	2.48132	2.04913	1.41214	1.44033	0.983646	1.50504	2.93557	3.3424	2.09438	2.00448	1.31141	1.99561	2.0799	1.79219	1.15459	2.1373	2.90707	2.57364
Cell_0187	AMPKARt2	Glucose 17 mM + Glutamine 2.500000e-01 mM + Insulin 10000 ng/ml	0.660155	0.623719	0.32354	0.654967	0.493242	0.437389	0.644789	0.421101	0.515118	0.600816	0.504813	0.681086	0.489512	0.595722	0.586393	0.516412	0.658619	0.620223	0.593186	0.617946	0.520883	0.667485	0.504029	0.367163	0.608127	0.577743	0.648739	0.612274	0.357786	0.568982	0.699638	0.578647	0.615698	0.551364	0.571134	0.346373	0.540686	0.63233	0.587022	0.56859	0.223471	0.544326	0.57867	0.426701	0.432327	0.657718	0.53629
Cell_0188	TFEB_TR	Glucose 17 mM + Glutamine 2.500000e-01 mM + Insulin 10000 ng/ml	1.12265	3.18243	1.35687	0.991292	2.82262	1.0354	1.26737	0.906696	1.58185	0.750276	1.79689	1.78064	1.58354	3.26925	0.930853	2.0661	1.05479	1.58458	1.44601	2.39333	1.57757	1.30969	1.03758	1.67155	0.765215	1.51341	1.14654	1.11376	1.72545	1.36838	1.82446	1.4375	0.975597	0.613462	2.18286	1.84859	1.79093	0.633224	1.35371	1.23895	1.44713	1.0363	0.678709	1.79517	1.56234	3.68624	2.03038
Cell_0188	FOXO_TR	Glucose 17 mM + Glutamine 2.500000e-01 mM + Insulin 10000 ng/ml	1.93478	2.68076	1.00813	1.62447	2.8611	2.8154	1.5897	0.889046	1.02952	1.78582	2.97465	1.50537	1.17558	1.38572	1.48364	2.79416	1.58754	1.34867	1.66294	2.58406	2.48931	2.4826	1.19293	1.11483	2.54212	3.10332	1.42112	1.86103	1.11161	2.87061	2.01246	1.37862	1.42459	1.00879	2.14699	2.87961	3.3042	1.98782	1.97088	1.28914	1.824	2.10691	1.81382	1.14903	2.1679	2.98228	2.62083
Cell_0188	AMPKARt2	Glucose 17 mM + Glutamine 2.500000e-01 mM + Insulin 10000 ng/ml	0.645054	0.615093	0.319076	0.654475	0.491334	0.441209	0.646382	0.404187	0.513269	0.592592	0.509242	0.688142	0.486883	0.620427	0.579257	0.527797	0.646404	0.615157	0.603907	0.607586	0.511352	0.671068	0.517521	0.42044	0.58672	0.561807	0.657362	0.598928	0.348586	0.52581	0.695107	0.583587	0.610042	0.545769	0.563065	0.378219	0.546131	0.596704	0.588241	0.56616	0.203654	0.53357	0.579486	0.432688	0.429437	0.66557	0.538909
Cell_0189	TFEB_TR	Glucose 17 mM + Glutamine 2.500000e-01 mM + Insulin 10000 ng/ml	1.07432	2.98148	1.36246	0.968788	2.87359	0.938518	1.44315	0.869714	1.6592	0.820547	1.75398	1.30992	1.51219	3.88604	0.945271	2.16556	1.08069	1.52112	1.446	2.79667	1.49335	1.32052	1.20018	1.67848	0.824426	1.54742	1.08391	1.14996	1.73251	1.3151	1.87039	1.38395	1.03058	0.618948	2.56959	1.81458	1.19838	0.661694	1.52016	1.44665	1.53536	1.04785	0.618865	1.9172	1.62346	2.56305	2.1984
Cell_0189	FOXO_TR	Glucose 17 mM + Glutamine 2.500000e-01 mM + Insulin 10000 ng/ml	1.87517	2.51619	1.01599	2.1803	2.96353	1.56823	1.61015	0.83892	1.08652	1.74852	2.86608	1.42723	1.14968	1.49905	1.51503	2.80898	1.58863	1.3332	1.65023	2.81565	2.42989	2.50501	1.25024	1.14181	2.59683	3.04568	1.42093	1.84846	1.08878	2.7168	2.06048	1.37771	1.37864	1.01565	2.77215	2.75648	1.4537	1.88086	1.88024	1.26517	1.84409	2.20112	1.85113	1.15684	2.1251	2.98011	2.68628
Cell_0189	AMPKARt2	Glucose 17 mM + Glutamine 2.500000e-01 mM + Insulin 10000 ng/ml	0.651809	0.611095	0.345824	0.617887	0.483998	0.531817	0.643045	0.401089	0.510003	0.561868	0.526254	0.69941	0.510046	0.623856	0.575358	0.543024	0.635746	0.617197	0.61193	0.596058	0.497625	0.659045	0.499626	0.435688	0.554621	0.57464	0.658472	0.59956	0.349803	0.549305	0.683141	0.595664	0.615546	0.525803	0.51238	0.381295	0.569465	0.564321	0.586745	0.584857	0.187785	0.535997	0.58018	0.469509	0.434319	0.654084	0.557285
Cell_0190	TFEB_TR	Glucose 17 mM + Glutamine 2.500000e-01 mM + Insulin 10000 ng/ml	1.04614	2.92918	1.43231	1.13523	2.86473	0.947511	1.56118	0.872663	1.7761	0.651896	1.86525	1.15707	1.54041	3.75542	0.967938	2.08516	1.14386	1.34976	1.42351	3.14162	1.40915	1.30741	1.20224	1.67408	0.848431	1.61676	1.07315	1.29111	1.71062	1.22491	2.02041	1.28213	1.07119	0.608795	2.59019	1.79613	1.15666	0.709347	1.39878	1.5402	1.56834	1.07159	0.634979	1.89235	1.47728	1.83744	2.43077
Cell_0190	FOXO_TR	Glucose 17 mM + Glutamine 2.500000e-01 mM + Insulin 10000 ng/ml	1.79959	2.38966	1.03066	2.45946	2.99463	1.57329	1.62542	0.833983	1.67053	1.6706	2.99669	1.40622	1.14172	1.45893	1.55101	2.75687	1.58496	1.32408	1.57913	3.08752	2.34339	2.55628	1.27458	1.15189	2.7115	2.99662	1.41771	1.75554	1.09419	2.59246	2.13845	1.36999	1.37111	0.999114	2.77793	2.76308	1.45711	1.80305	1.81957	1.57736	2.00243	2.25259	1.93996	1.21735	2.03777	2.97	2.90181
Cell_0190	AMPKARt2	Glucose 17 mM + Glutamine 2.500000e-01 mM + Insulin 10000 ng/ml	0.662151	0.596854	0.345282	0.613943	0.493235	0.531232	0.640876	0.405499	0.497031	0.563794	0.533615	0.660527	0.517376	0.60735	0.574201	0.538765	0.636713	0.620651	0.613065	0.600865	0.502424	0.656517	0.492838	0.432591	0.549091	0.584983	0.654547	0.614562	0.357178	0.589443	0.68607	0.595568	0.5925	0.530299	0.493164	0.354184	0.568624	0.560283	0.569716	0.602366	0.201747	0.560189	0.595775	0.513024	0.445212	0.647784	0.567508
Cell_0191	TFEB_TR	Glucose 17 mM + Glutamine 2.500000e-01 mM + Insulin 10000 ng/ml	1.06233	2.8187	1.52411	1.15188	2.9375	0.968247	1.40653	0.900911	1.94463	0.564183	0.993213	1.61636	1.70907	3.06393	0.991276	1.91175	1.08706	1.18476	1.39078	3.64915	1.38904	1.3286	1.02285	1.60511	0.83058	1.85925	0.98212	1.39308	1.68613	1.16531	1.96796	1.30884	1.14549	0.612365	2.1277	1.8136	1.17272	0.68309	1.27625	1.53819	1.50725	0.777999	0.686124	1.66876	1.3492	2.38857	2.25971
Cell_0191	FOXO_TR	Glucose 17 mM + Glutamine 2.500000e-01 mM + Insulin 10000 ng/ml	1.76587	2.3166	1.042	2.51586	2.89371	1.53548	1.62062	0.853668	2.60252	1.64751	1.38116	1.55939	1.17064	1.45646	1.53868	2.70218	1.5717	1.30074	1.54627	3.36122	2.28359	2.6188	1.28159	1.13183	2.79212	2.99269	1.39375	1.5917	1.10488	2.70049	2.23507	1.34367	1.34933	0.991583	2.6446	2.85597	1.41182	1.72747	1.79083	2.11092	2.11667	1.77886	2.06353	1.32791	2.27482	3.01741	2.9686
Cell_0191	AMPKARt2	Glucose 17 mM + Glutamine 2.500000e-01 mM + Insulin 10000 ng/ml	0.663319	0.584422	0.33047	0.650829	0.488936	0.522089	0.641342	0.394351	0.455208	0.598891	0.656853	0.584213	0.523963	0.631665	0.569384	0.529638	0.642829	0.629344	0.608737	0.61027	0.514633	0.669526	0.495675	0.435722	0.556396	0.582166	0.65277	0.609059	0.349456	0.581626	0.683817	0.593177	0.57837	0.535386	0.525508	0.371262	0.576699	0.548902	0.549799	0.577252	0.214201	0.592184	0.596582	0.517702	0.454349	0.655549	0.5741
Cell_0192	TFEB_TR	Glucose 17 mM + Glutamine 2.500000e-01 mM + Insulin 10000 ng/ml	1.05075	2.44224	1.48527	0.997478	2.70603	0.970092	1.2297	0.90208	1.96757	0.682667	0.88309	1.69011	1.69749	2.90521	0.989949	1.79884	1.03869	1.33684	1.33272	4.02504	1.31943	1.35237	0.854505	1.56578	0.839193	1.82025	1.02606	1.37873	1.71851	1.19856	1.89858	1.43291	1.20188	0.6363	2.02958	2.11722	1.34404	0.678891	1.43691	1.64627	1.48403	0.935578	0.709604	1.42018	1.53794	2.77751	2.15401
Cell_0192	FOXO_TR	Glucose 17 mM + Glutamine 2.500000e-01 mM + Insulin 10000 ng/ml	1.7568	2.20978	1.03225	2.57431	2.82045	1.51225	1.54513	0.853336	3.10804	1.6381	1.35817	1.68255	1.16855	1.98289	1.52941	2.65976	1.61481	1.28487	1.5544	3.4564	2.20503	2.57929	1.31836	1.13946	2.86622	3.05766	1.35373	1.47734	1.10372	2.63558	2.35762	1.32559	1.28441	0.98688	2.67116	2.99082	1.36042	1.67629	1.77137	2.36798	2.14877	1.80187	2.10959	1.26284	2.74241	2.92394	2.8814
Cell_0192	AMPKARt2	Glucose 17 mM + Glutamine 2.500000e-01 mM + Insulin 10000 ng/ml	0.662969	0.584345	0.345458	0.676711	0.460871	0.51556	0.631432	0.390389	0.398505	0.601765	0.646794	0.549483	0.534277	0.655317	0.563075	0.545135	0.646548	0.632846	0.600637	0.604304	0.510295	0.669032	0.473198	0.451571	0.565515	0.575869	0.663481	0.591644	0.344861	0.567425	0.670228	0.60095	0.568537	0.52711	0.553321	0.405344	0.583289	0.530455	0.55145	0.54339	0.224708	0.607282	0.565082	0.514419	0.446865	0.652325	0.581386
Cell_0193	TFEB_TR	Glucose 17 mM + Glutamine 2.500000e-01 mM + Insulin 10000 ng/ml	0.968656	2.1279	1.35888	0.97795	2.55756	0.956851	1.33166	0.894042	1.88871	0.690807	0.770597	1.26059	1.59795	3.05721	0.982827	1.13475	1.09276	1.60345	1.24546	4.0789	1.32649	1.30293	0.92512	1.57351	0.863577	1.62274	1.23981	1.35349	1.73344	1.19289	1.99406	1.49257	1.26684	0.641454	2.19681	2.46718	1.37415	0.738973	1.53145	1.58803	1.42277	0.988165	0.75222	1.36335	1.62408	2.65508	1.17049
Cell_0193	FOXO_TR	Glucose 17 mM + Glutamine 2.500000e-01 mM + Insulin 10000 ng/ml	1.69084	2.07337	1.01641	2.62515	2.83717	1.51418	1.41929	0.853768	3.07072	1.54045	1.35852	1.68189	1.15126	2.75206	1.56174	2.28627	1.67269	1.28124	1.6016	3.29725	2.27386	2.53287	1.34451	1.17195	2.86991	3.06257	1.38746	1.40839	1.10143	2.36345	2.38117	1.30888	1.22912	0.986151	2.65091	3.1316	1.36742	1.63914	1.77405	2.36039	2.15562	1.93259	2.0059	1.08363	2.99044	2.77096	1.97402
Cell_0193	AMPKARt2	Glucose 17 mM + Glutamine 2.500000e-01 mM + Insulin 10000 ng/ml	0.662053	0.589729	0.36727	0.670123	0.455304	0.522113	0.614745	0.402763	0.366914	0.565302	0.65512	0.546959	0.52583	0.602522	0.565213	0.663549	0.645182	0.637788	0.603977	0.598501	0.499433	0.664025	0.473151	0.470169	0.563161	0.571638	0.666057	0.57711	0.36354	0.578724	0.667221	0.599463	0.536124	0.52927	0.546747	0.411217	0.575219	0.527345	0.568152	0.556834	0.250357	0.617149	0.538662	0.536062	0.420175	0.637725	0.658571
Cell_0194	TFEB_TR	Glucose 17 mM + Glutamine 2.500000e-01 mM + Insulin 10000 ng/ml	0.908095	1.96653	1.35643	1.0923	2.81752	0.922801	1.45707	0.87952	1.97678	0.611934	0.794968	1.10468	1.61504	2.9299	1.01107	1.1512	1.01779	1.51764	1.21238	4.01066	1.58825	1.29605	0.933757	1.5654	0.891124	1.70171	1.24837	1.35455	1.70681	1.13215	1.95123	1.45054	1.34738	0.622751	2.24931	2.50136	1.13552	0.782688	1.34436	1.33036	1.46649	1.10288	0.823808	1.40087	1.48945	2.82159	0.871508
Cell_0194	FOXO_TR	Glucose 17 mM + Glutamine 2.500000e-01 mM + Insulin 10000 ng/ml	1.62012	1.9465	1.01115	2.55191	2.83734	1.47889	1.40133	0.847223	3.05603	1.46044	1.39078	1.74142	1.15641	3.12271	1.54087	2.19653	1.64629	1.26151	1.86434	3.18045	2.57112	2.5978	1.33616	1.14855	2.78203	3.01393	1.50832	1.35747	1.10621	2.25611	2.26014	1.29116	1.19318	1.00456	2.79541	3.07614	1.34944	1.64134	1.78587	2.37606	2.12975	2.03051	1.87303	1.09626	3.01573	2.85168	1.90881
Cell_0194	AMPKARt2	Glucose 17 mM + Glutamine 2.500000e-01 mM + Insulin 10000 ng/ml	0.665866	0.586021	0.370677	0.645328	0.480485	0.538583	0.619485	0.408589	0.3648	0.543437	0.676044	0.521469	0.514177	0.532564	0.57257	0.661744	0.642282	0.660739	0.603231	0.603747	0.50539	0.675671	0.514455	0.474447	0.55055	0.569346	0.657756	0.573433	0.376667	0.582918	0.665644	0.591197	0.523656	0.525275	0.520371	0.407939	0.577267	0.528506	0.57523	0.58285	0.25346	0.622817	0.537015	0.559125	0.396553	0.62947	0.656682
Cell_0195	TFEB_TR	Glucose 17 mM + Glutamine 2.500000e-01 mM + Insulin 10000 ng/ml	0.927171	1.75789	1.39916	1.22899	2.86485	0.879986	1.43307	0.847576	2.14597	0.678079	0.973116	1.1185	1.70372	2.91937	1.05703	1.08221	0.936826	1.34325	1.26664	3.84019	0.793796	1.39918	0.781605	1.53743	0.938801	1.72629	1.18699	1.29399	1.72695	1.19842	1.77023	1.45529	1.38407	0.612448	2.48156	2.33878	1.0767	0.855631	1.08087	1.2198	1.68205	1.14707	0.907192	1.41208	1.63	2.84889	0.865713
Cell_0195	FOXO_TR	Glucose 17 mM + Glutamine 2.500000e-01 mM + Insulin 10000 ng/ml	1.62846	1.85904	0.998485	2.44391	2.80187	1.46403	1.46665	0.832331	3.23162	1.46852	1.41553	1.80316	1.12074	3.16461	1.48348	2.24209	1.58335	1.22738	2.24996	3.1973	1.40061	2.75404	1.31387	1.13137	2.80938	3.0422	1.60876	1.36875	1.13236	2.39171	2.22608	1.29292	1.16683	0.993311	3.08533	2.94487	1.32289	1.69442	1.83914	2.40447	2.13637	1.97029	1.81385	1.19029	3.01733	2.9951	1.95745
Cell_0195	AMPKARt2	Glucose 17 mM + Glutamine 2.500000e-01 mM + Insulin 10000 ng/ml	0.674889	0.574882	0.36778	0.623957	0.489316	0.554166	0.636622	0.405263	0.37293	0.557883	0.689618	0.483989	0.518942	0.521295	0.575744	0.65801	0.640653	0.672116	0.586061	0.603835	0.63409	0.669926	0.518724	0.477696	0.551019	0.560444	0.670659	0.580237	0.366325	0.571512	0.661305	0.589989	0.549088	0.507581	0.504123	0.415998	0.598116	0.523682	0.57349	0.577952	0.225982	0.627401	0.539099	0.560758	0.383448	0.629265	0.64954
Cell_0196	TFEB_TR	Glucose 17 mM + Glutamine 2.500000e-01 mM + Insulin 10000 ng/ml	0.931429	1.68191	1.38549	1.38455	2.66363	0.904185	1.3993	0.843224	2.16419	0.716269	1.07251	1.04346	1.78269	3.10865	1.08271	1.06947	1.04482	1.33925	1.33039	3.63732	0.756343	1.43895	0.86225	1.52411	0.963291	1.45984	1.27229	1.22192	1.75008	1.31695	1.86575	1.54668	1.40469	0.614161	2.72076	2.26687	1.20222	0.988315	1.00444	1.29317	1.72023	0.930815	1.05594	1.45249	1.77998	2.47494	0.977814
Cell_0196	FOXO_TR	Glucose 17 mM + Glutamine 2.500000e-01 mM + Insulin 10000 ng/ml	1.63033	1.83315	0.986021	2.4218	2.82316	1.53767	1.42793	0.841428	3.28653	1.46131	1.36854	1.6754	1.06705	3.16097	1.47905	2.31167	1.52069	1.20914	2.43415	3.13787	1.40008	2.92116	1.28079	1.37721	2.97781	3.04393	1.71807	1.39919	1.15116	2.53415	2.33421	1.30505	1.15282	0.983315	3.1229	3.04518	1.51829	1.65171	1.91332	2.42774	2.25328	1.85345	1.78843	1.1098	3.0486	2.95048	2.03631
Cell_0196	AMPKARt2	Glucose 17 mM + Glutamine 2.500000e-01 mM + Insulin 10000 ng/ml	0.671749	0.579446	0.364137	0.621505	0.475726	0.554634	0.635042	0.397626	0.390604	0.585118	0.683234	0.466612	0.532266	0.535456	0.57041	0.66908	0.632179	0.657582	0.601772	0.595984	0.641019	0.630578	0.478857	0.491159	0.555068	0.558816	0.667369	0.580866	0.362117	0.56386	0.675767	0.590069	0.56222	0.516618	0.501394	0.436638	0.595047	0.520638	0.572169	0.567156	0.220981	0.626335	0.537716	0.554076	0.374612	0.633401	0.644584
Cell_0197	TFEB_TR	Glucose 17 mM + Glutamine 2.500000e-01 mM + Insulin 10000 ng/ml	0.886293	1.83229	1.43413	1.48662	2.69017	0.959122	1.31701	0.881137	2.08045	0.651682	0.952907	1.32577	1.74506	3.06331	1.09088	1.17052	0.998021	1.26987	1.32209	3.48342	0.695533	1.41102	0.966198	1.60762	0.959575	1.0702	1.36135	1.27683	1.69819	1.22347	2.06964	1.58515	1.45921	0.625477	2.65444	2.25903	1.06053	1.08105	1.22857	1.37932	1.58498	0.767556	1.13011	1.53039	1.58843	2.56928	0.949183
Cell_0197	FOXO_TR	Glucose 17 mM + Glutamine 2.500000e-01 mM + Insulin 10000 ng/ml	1.59173	1.84028	0.998538	2.39988	2.87007	1.58362	1.3403	0.860731	3.18431	1.42594	1.30963	1.50092	1.09342	3.10586	1.48309	2.33944	1.42288	1.21186	2.38813	3.10527	1.39253	2.87474	1.2535	1.9349	2.99774	1.67599	1.89635	1.39587	1.13324	2.50535	2.3896	1.29699	1.12742	1.04037	3.09031	3.15996	1.82419	1.52281	1.92063	2.49103	2.34906	1.78988	1.74032	1.01446	3.13549	2.85802	1.99637
Cell_0197	AMPKARt2	Glucose 17 mM + Glutamine 2.500000e-01 mM + Insulin 10000 ng/ml	0.662574	0.599591	0.361685	0.615231	0.475647	0.538043	0.628323	0.385668	0.417469	0.597959	0.67264	0.465876	0.545892	0.534627	0.557084	0.677877	0.621725	0.654625	0.646706	0.59163	0.639787	0.60293	0.473224	0.481891	0.546041	0.482655	0.606996	0.566309	0.385412	0.559118	0.694396	0.597471	0.561639	0.530204	0.484397	0.451183	0.572042	0.527531	0.566319	0.561665	0.230637	0.621908	0.539334	0.554381	0.383296	0.633761	0.644377
Cell_0198	TFEB_TR	Glucose 17 mM + Glutamine 2.500000e-01 mM + Insulin 10000 ng/ml	0.899541	1.84499	1.51227	1.47368	2.78017	0.943687	1.25154	0.882841	1.99992	0.663686	0.854078	1.59478	1.62372	3.0517	1.07999	1.24728	0.847489	1.21973	1.23574	3.43399	0.702858	1.49949	0.857245	1.81566	0.988495	0.978581	1.48969	1.34049	1.65455	1.09892	1.97902	1.57451	1.48806	0.641727	2.62701	2.12221	0.891024	1.12227	1.50922	1.38541	1.68268	0.851387	1.11438	1.54629	1.58147	2.65059	0.958423
Cell_0198	FOXO_TR	Glucose 17 mM + Glutamine 2.500000e-01 mM + Insulin 10000 ng/ml	1.6238	1.80173	0.983636	2.33698	2.84433	1.53848	1.32784	0.859244	3.16858	1.42025	1.358	1.42411	1.12581	3.14168	1.50832	2.35161	1.35324	1.20593	2.30975	3.2363	1.36173	2.5645	1.24851	2.43683	2.83945	1.72066	1.9652	1.38852	1.15831	2.41706	2.46733	1.26771	1.09544	1.0282	3.15893	3.06642	1.85959	1.52408	1.91218	2.50858	2.36759	1.7545	1.70837	1.02832	3.1293	2.85827	1.95878
Cell_0198	AMPKARt2	Glucose 17 mM + Glutamine 2.500000e-01 mM + Insulin 10000 ng/ml	0.668092	0.608082	0.368511	0.591427	0.483722	0.523485	0.633637	0.381612	0.436663	0.592901	0.681824	0.460352	0.548965	0.527413	0.548919	0.668434	0.621489	0.666304	0.649213	0.594837	0.644983	0.602048	0.510096	0.428394	0.539347	0.483733	0.566018	0.548694	0.416732	0.555733	0.696357	0.608487	0.585257	0.510396	0.470967	0.44438	0.573419	0.537552	0.553465	0.549658	0.207328	0.626634	0.536027	0.553378	0.405388	0.625592	0.641783
Cell_0199	TFEB_TR	Glucose 17 mM + Glutamine 2.500000e-01 mM + Insulin 10000 ng/ml	0.966851	1.6104	1.56305	1.3872	2.80414	0.905502	1.34101	0.829766	1.96346	0.673157	0.950012	1.18502	1.64953	3.34062	1.05347	1.2682	1.03776	1.29805	1.15564	3.70494	0.754794	1.69157	0.92748	1.98637	1.01293	0.947698	1.51183	1.28399	1.66853	1.22027	0.685278	1.56351	1.41641	0.637598	2.6195	2.00949	1.13682	1.15105	1.60745	1.29136	1.92149	0.921231	1.37887	1.48706	1.67457	2.41965	1.13133
Cell_0199	FOXO_TR	Glucose 17 mM + Glutamine 2.500000e-01 mM + Insulin 10000 ng/ml	1.7091	1.69333	0.985148	2.364	2.78495	1.50156	1.30316	0.822376	3.19967	1.44987	1.43289	1.32437	1.10719	3.30941	1.60626	2.30115	1.36362	1.17857	2.32629	3.32438	1.35963	2.31183	1.24417	2.57954	2.75167	1.67223	1.86432	1.36234	1.289	2.47951	1.36682	1.25937	1.09003	1.00448	3.02912	3.02945	1.6922	1.59985	1.88168	2.46435	2.44035	1.70755	1.77947	1.012	2.98442	2.9574	2.08126
Cell_0199	AMPKARt2	Glucose 17 mM + Glutamine 2.500000e-01 mM + Insulin 10000 ng/ml	0.678065	0.606845	0.387851	0.58851	0.480287	0.528271	0.63706	0.38255	0.438826	0.586297	0.690271	0.45825	0.538156	0.526337	0.55643	0.669043	0.62168	0.668004	0.623157	0.603474	0.649667	0.599136	0.532221	0.35959	0.543008	0.473494	0.58497	0.551016	0.42423	0.556748	0.651862	0.596988	0.605511	0.511054	0.491497	0.447422	0.583391	0.530089	0.536135	0.547393	0.185951	0.630895	0.523782	0.553259	0.40735	0.622839	0.640311
Cell_0200	TFEB_TR	Glucose 17 mM + Glutamine 2.500000e-01 mM + Insulin 10000 ng/ml	0.981388	1.44261	1.64687	1.33987	2.79833	0.909896	1.37644	0.838424	2.00946	0.654355	0.985857	0.864658	1.78768	3.42645	1.04957	1.27426	1.21769	1.27642	1.14788	3.80971	0.752508	1.85189	1.01068	2.02896	0.96993	1.00887	1.25123	1.27716	1.69892	1.31129	0.674925	1.45268	1.30873	0.629543	2.33097	2.08898	1.39952	1.137	1.62801	1.29884	1.90575	0.900468	1.68792	1.50598	1.37753	3.52801	1.24505
Cell_0200	FOXO_TR	Glucose 17 mM + Glutamine 2.500000e-01 mM + Insulin 10000 ng/ml	1.74857	1.60806	1.30125	2.47854	2.75331	1.49714	1.25639	0.777986	3.11329	1.55486	1.40624	1.20268	1.14426	3.2897	1.58381	2.24791	1.37125	1.15193	2.4333	3.28004	1.3774	2.21634	1.23041	2.51865	2.72391	1.63379	1.83284	1.30992	1.44527	2.60028	1.36909	1.28714	1.07736	1.33407	2.83817	3.0484	1.60621	1.5522	1.7705	2.41661	2.51412	1.68204	1.83036	1.03287	3.06199	3.06931	2.15997
Cell_0200	AMPKARt2	Glucose 17 mM + Glutamine 2.500000e-01 mM + Insulin 10000 ng/ml	0.675197	0.613984	0.412285	0.607692	0.491681	0.546077	0.634126	0.376748	0.428305	0.589998	0.675194	0.473624	0.53047	0.535774	0.570499	0.681383	0.617095	0.665881	0.619492	0.606039	0.642096	0.594095	0.518513	0.32554	0.542626	0.474835	0.590231	0.568136	0.407659	0.551122	0.654025	0.573066	0.591149	0.545619	0.507133	0.464816	0.575485	0.515161	0.534482	0.554887	0.199121	0.62469	0.520489	0.56797	0.390188	0.629088	0.644603
Cell_0201	TFEB_TR	Glucose 17 mM + Glutamine 2.500000e-01 mM + Insulin 10000 ng/ml	0.974299	1.44848	1.68833	1.39094	1.06961	0.919932	1.31225	0.929653	2.04356	0.739918	0.945294	1.08558	1.83249	3.14275	1.05026	1.21789	1.04027	1.23784	1.16129	3.29202	0.772142	1.8846	0.930713	2.0677	0.942554	1.00421	1.168	1.34639	1.74115	1.2201	0.637468	1.32581	1.25003	0.647032	2.16218	1.28332	1.24116	1.07667	1.52577	1.43612	1.75173	0.937903	1.4949	1.60711	1.25848	5.02575	1.24494
Cell_0201	FOXO_TR	Glucose 17 mM + Glutamine 2.500000e-01 mM + Insulin 10000 ng/ml	1.71938	1.59261	2.00669	2.54319	1.74634	1.49008	1.28432	0.902408	3.04281	1.71111	1.36284	1.18383	1.17421	3.09962	1.36765	2.30288	1.33815	1.12648	2.52264	3.19173	1.36345	2.0933	1.22108	2.54015	2.679	1.7059	1.89926	1.28339	1.5115	2.64911	1.37662	1.30765	1.02308	1.87043	2.8776	1.88665	1.56786	1.47305	1.85569	2.36045	2.49911	1.72072	1.65245	1.12577	3.40197	3.03978	2.06062
Cell_0201	AMPKARt2	Glucose 17 mM + Glutamine 2.500000e-01 mM + Insulin 10000 ng/ml	0.658746	0.619638	0.415229	0.606558	0.675403	0.552273	0.62894	0.383735	0.414699	0.595812	0.67076	0.462472	0.5288	0.54614	0.580968	0.677919	0.614908	0.668058	0.615458	0.597309	0.640887	0.59729	0.501695	0.348947	0.527691	0.48649	0.566824	0.565471	0.396317	0.537369	0.650963	0.564409	0.582707	0.553527	0.497714	0.562093	0.571422	0.52204	0.564758	0.551898	0.199936	0.633523	0.532017	0.574677	0.391257	0.628159	0.644136
Cell_0202	TFEB_TR	Glucose 17 mM + Glutamine 2.500000e-01 mM + Insulin 10000 ng/ml	0.998732	1.45071	1.67433	1.42914	1.1314	0.929226	1.37427	0.986476	1.9681	0.781438	1.115	1.22039	1.83353	2.93292	1.00769	1.1747	0.965261	1.31139	1.14017	3.06167	0.823765	1.76965	1.17848	2.13542	0.981994	0.856068	1.39848	1.30108	1.75263	1.26146	0.661066	1.4055	1.20592	0.659859	2.3775	1.12314	1.0324	0.997585	1.38185	1.34615	1.7484	0.993301	1.29125	1.68194	1.50071	4.24866	1.14592
Cell_0202	FOXO_TR	Glucose 17 mM + Glutamine 2.500000e-01 mM + Insulin 10000 ng/ml	1.59081	1.56169	2.60986	2.57923	1.75553	1.49452	1.32195	1.35354	3.06677	1.81366	1.37788	1.20415	1.11714	3.03471	1.29302	2.33065	1.33805	1.10332	2.52275	3.09667	1.38733	1.95396	1.22018	2.66905	2.71708	1.75447	1.87538	1.2709	1.46743	2.7679	1.42727	1.32025	0.985832	2.12056	2.92033	1.92901	1.50526	1.46837	2.30932	2.33176	2.45577	1.76046	1.42447	1.01923	3.53591	3.00143	2.02428
Cell_0202	AMPKARt2	Glucose 17 mM + Glutamine 2.500000e-01 mM + Insulin 10000 ng/ml	0.635576	0.620076	0.384803	0.59019	0.680954	0.527939	0.625951	0.409408	0.407755	0.593017	0.686049	0.433021	0.523353	0.548214	0.582447	0.673864	0.608397	0.673633	0.598193	0.592894	0.652245	0.593951	0.512108	0.389085	0.517946	0.494067	0.566125	0.556519	0.394173	0.526535	0.654379	0.562843	0.598426	0.542114	0.500739	0.558896	0.581081	0.536373	0.582033	0.549882	0.184609	0.653146	0.532692	0.561689	0.411259	0.614826	0.641931
Cell_0203	TFEB_TR	Glucose 17 mM + Glutamine 2.500000e-01 mM + Insulin 10000 ng/ml	1.03561	1.42475	1.67331	1.40093	1.04884	0.973551	1.48571	1.03609	1.90966	0.602181	1.25085	1.3979	1.85666	2.9355	0.981448	1.28049	1.07659	1.28046	1.11092	3.29043	0.775103	1.73669	1.35742	2.13017	0.983766	0.896574	1.49185	1.2387	1.74153	1.41568	0.719351	1.57939	1.20548	0.662065	2.52305	1.1051	1.10626	0.949367	1.61979	1.19152	1.27105	1.00785	1.48466	1.93451	1.34576	2.62945	1.01545
Cell_0203	FOXO_TR	Glucose 17 mM + Glutamine 2.500000e-01 mM + Insulin 10000 ng/ml	1.43386	1.51197	2.71554	2.64882	1.83512	1.4901	1.30484	1.95103	2.98498	1.14249	1.39422	1.16403	1.24922	3.00443	1.47084	2.24884	1.38162	1.11473	2.46297	3.07231	1.46946	1.88298	1.23333	2.77696	2.7157	1.64969	1.80665	1.2349	1.43744	2.98962	1.44096	1.34561	0.995824	2.15672	2.88296	1.97466	1.47763	1.42418	2.77339	2.3628	2.12252	1.73895	1.42976	0.91762	3.41628	3.1229	2.11421
Cell_0203	AMPKARt2	Glucose 17 mM + Glutamine 2.500000e-01 mM + Insulin 10000 ng/ml	0.616987	0.63076	0.355909	0.58435	0.680332	0.485678	0.634083	0.417697	0.399038	0.574878	0.679218	0.490616	0.523383	0.556854	0.573531	0.687895	0.595859	0.679486	0.595043	0.599027	0.659203	0.587365	0.52976	0.398275	0.535436	0.49718	0.579665	0.586228	0.379239	0.525031	0.664888	0.556262	0.603221	0.535735	0.50986	0.56731	0.589821	0.540406	0.555922	0.554342	0.631722	0.633411	0.516292	0.569442	0.412869	0.600184	0.65334
Cell_0204	TFEB_TR	Glucose 17 mM + Glutamine 2.500000e-01 mM + Insulin 10000 ng/ml	1.14756	1.48037	1.60555	1.44304	1.12172	1.04828	1.53708	1.15588	2.00401	0.588965	1.0583	1.61144	1.85065	3.00452	1.01806	1.41143	1.09705	1.16858	1.10945	2.89136	0.799903	1.94661	1.08144	2.06788	0.943128	1.20676	1.46776	1.32697	1.83861	1.43549	0.715391	1.57208	1.25856	0.68753	2.4588	0.985853	1.16455	0.977387	1.78947	1.35976	1.42931	1.03076	1.51707	2.41886	1.14396	2.40667	1.13279
Cell_0204	FOXO_TR	Glucose 17 mM + Glutamine 2.500000e-01 mM + Insulin 10000 ng/ml	1.39642	1.53203	2.57634	2.66567	1.88976	1.44902	1.28116	2.33097	2.81181	1.11329	1.42496	1.12346	1.73157	2.91207	1.58346	2.29397	1.39127	1.12585	2.39795	3.04717	1.56502	1.86068	1.29311	2.80209	2.55812	1.56476	1.81513	1.18971	1.51633	3.13875	1.3643	1.3306	0.995118	2.22953	2.90357	1.95103	1.45787	1.34599	2.96751	2.4096	2.05418	1.73034	1.50654	1.4895	3.42229	3.15959	2.1286
Cell_0204	AMPKARt2	Glucose 17 mM + Glutamine 2.500000e-01 mM + Insulin 10000 ng/ml	0.600107	0.642739	0.356522	0.585402	0.678174	0.461398	0.639969	0.400167	0.382168	0.561246	0.659708	0.605971	0.537241	0.574306	0.571551	0.689864	0.590654	0.677368	0.597309	0.604489	0.662923	0.592438	0.524483	0.38582	0.550211	0.48672	0.575456	0.62577	0.355015	0.53972	0.667666	0.55273	0.601621	0.519474	0.497526	0.58059	0.595643	0.556894	0.536304	0.544439	0.600591	0.574329	0.51143	0.584199	0.406234	0.605326	0.662227
Cell_0205	TFEB_TR	Glucose 17 mM + Glutamine 2.500000e-01 mM + Insulin 10000 ng/ml	1.30814	1.53496	1.53228	1.61252	1.23197	1.15286	1.57066	1.21943	2.13665	0.583363	0.892236	1.25551	1.85394	2.97401	1.33849	1.41203	1.16378	1.19714	1.14163	2.23424	1.02992	2.03134	1.13596	2.06227	0.966414	1.25281	1.49929	1.37131	1.99288	1.41166	0.722902	1.43074	1.19174	0.708342	2.49768	1.00814	1.02817	0.977156	1.26403	1.38898	1.07688	1.05134	1.40853	2.65143	1.61669	1.10232	1.21473
Cell_0205	FOXO_TR	Glucose 17 mM + Glutamine 2.500000e-01 mM + Insulin 10000 ng/ml	1.39051	1.5678	2.54111	2.62198	1.83726	1.40874	1.23097	2.32597	2.79569	1.08944	1.47877	1.1295	2.30603	2.92755	1.3372	2.52019	1.36793	1.12259	2.38003	2.88033	1.73311	1.83001	1.37745	2.77553	2.50782	1.67486	1.84461	1.15939	1.59599	3.12255	1.31723	1.27355	0.978463	2.27006	2.85408	1.92696	1.40411	1.35296	2.93836	2.4201	2.06371	1.72284	1.42752	2.5211	3.50108	1.74803	2.10121
Cell_0205	AMPKARt2	Glucose 17 mM + Glutamine 2.500000e-01 mM + Insulin 10000 ng/ml	0.579238	0.642713	0.368827	0.58182	0.677403	0.466268	0.634464	0.384571	0.379516	0.564963	0.658583	0.636525	0.554989	0.57867	0.571059	0.662342	0.595896	0.68404	0.58478	0.605154	0.669988	0.591868	0.508918	0.36683	0.53575	0.476173	0.567733	0.618378	0.342975	0.556712	0.660033	0.554887	0.615482	0.515454	0.487115	0.578088	0.594034	0.581865	0.545666	0.529157	0.593248	0.520969	0.518903	0.534372	0.432434	0.577817	0.64684
Cell_0206	TFEB_TR	Glucose 17 mM + Glutamine 2.500000e-01 mM + Insulin 10000 ng/ml	1.3434	1.46347	1.55446	1.69254	1.09014	1.34103	1.4168	1.16147	2.14364	0.584497	0.93046	1.02596	1.85096	2.70643	1.80527	1.38475	1.16623	1.33315	1.18186	2.21056	1.09917	1.80087	1.29319	2.14019	1.00774	0.950207	1.46171	1.20155	2.05162	1.39182	0.780019	1.38005	1.06885	0.6995	2.57812	1.27864	1.00566	0.883177	0.926429	1.08182	0.842673	1.09112	1.58863	2.46294	1.9789	1.27478	1.06768
Cell_0206	FOXO_TR	Glucose 17 mM + Glutamine 2.500000e-01 mM + Insulin 10000 ng/ml	1.30999	1.51895	2.52208	2.63117	1.79257	1.41009	1.14504	2.08023	2.9098	1.06648	1.46261	1.11433	2.71835	2.96894	1.33383	2.65327	1.38094	1.2863	2.38074	2.78716	1.90004	1.72888	1.37239	2.75094	2.57172	1.80871	1.84827	1.18001	1.62442	3.04598	1.37416	1.25248	0.990557	2.28778	2.78638	1.94127	1.35455	1.36456	2.8014	2.35144	2.05183	1.612	1.33133	3.03927	3.36007	1.73345	2.1724
Cell_0206	AMPKARt2	Glucose 17 mM + Glutamine 2.500000e-01 mM + Insulin 10000 ng/ml	0.57173	0.642333	0.370908	0.577053	0.675681	0.471898	0.641914	0.376014	0.395206	0.577668	0.651598	0.603298	0.565671	0.571551	0.586081	0.631855	0.602504	0.705698	0.573603	0.604085	0.660778	0.586765	0.508372	0.341969	0.517534	0.488014	0.574155	0.58737	0.348508	0.556436	0.653155	0.555273	0.620225	0.535817	0.492435	0.562966	0.574108	0.58242	0.558889	0.532468	0.603967	0.492265	0.515318	0.442954	0.457222	0.586459	0.621079
Cell_0207	TFEB_TR	Glucose 17 mM + Glutamine 2.500000e-01 mM + Insulin 10000 ng/ml	1.34154	1.42553	1.51092	1.47067	1.01052	1.58177	1.11457	1.12679	2.15861	0.596017	0.898034	1.56302	1.74863	2.43872	1.7758	1.46792	0.982753	1.47385	1.19527	1.21039	1.15057	1.73188	1.02146	2.21945	0.972907	0.871478	1.42346	1.04571	2.09846	1.28775	0.756642	1.40245	1.1098	0.706161	2.43639	1.29773	1.19371	0.872255	1.36419	1.10776	1.04767	1.11548	1.68361	2.23728	1.66096	1.52627	1.43081
Cell_0207	FOXO_TR	Glucose 17 mM + Glutamine 2.500000e-01 mM + Insulin 10000 ng/ml	1.30136	1.45949	2.39561	2.66088	1.82462	1.43501	1.11039	1.92753	2.96564	1.07136	1.38173	1.07218	2.81811	2.86358	1.32698	2.62382	1.4082	1.7191	2.30696	1.67297	1.87672	1.65564	1.35583	2.73829	2.47359	1.76417	1.85261	1.22354	1.70387	3.08925	1.47503	1.24286	1.0075	2.32042	2.92829	1.91017	1.32042	1.31812	2.76314	2.27039	2.03487	1.50152	1.33115	2.92018	3.17698	1.74066	2.2598
Cell_0207	AMPKARt2	Glucose 17 mM + Glutamine 2.500000e-01 mM + Insulin 10000 ng/ml	0.574379	0.643204	0.368329	0.589235	0.67488	0.459349	0.650873	0.367222	0.40385	0.592933	0.631822	0.603733	0.565583	0.573663	0.60349	0.613701	0.605135	0.705777	0.573049	0.528675	0.621453	0.598025	0.523909	0.330432	0.511247	0.500849	0.574247	0.582319	0.359051	0.55985	0.653514	0.557799	0.612222	0.541575	0.49103	0.566074	0.549599	0.575008	0.573873	0.545766	0.607849	0.485497	0.513402	0.406533	0.434689	0.583744	0.600695
Cell_0208	TFEB_TR	Glucose 17 mM + Glutamine 2.500000e-01 mM + Insulin 10000 ng/ml	1.49048	1.54348	1.42801	1.21012	1.1238	1.69259	1.07878	1.13719	2.31231	0.601121	0.849225	1.91857	1.62525	2.3781	1.50315	1.58006	1.03484	1.56093	1.20235	1.18764	1.71727	1.91472	1.17509	2.24093	0.911313	1.06745	1.48611	1.13774	2.20692	1.29046	0.693807	1.34886	1.15829	0.737521	2.28974	1.13042	1.2317	0.996011	1.63567	1.41465	1.07286	0.987229	1.44592	2.21513	1.47711	1.4749	1.96668
Cell_0208	FOXO_TR	Glucose 17 mM + Glutamine 2.500000e-01 mM + Insulin 10000 ng/ml	1.39064	1.48951	2.31417	2.64308	1.84583	1.42502	1.12922	1.97658	2.97692	1.09283	1.33363	1.09616	2.61563	2.75998	1.33366	2.551	1.3874	2.15815	2.23184	1.56518	1.75028	1.69705	1.58789	2.72079	2.40708	1.63189	1.84516	1.15245	1.79169	3.13685	1.56123	1.19111	1.01437	2.27681	3.12262	1.89245	1.27719	1.33698	2.86712	2.29106	2.09448	1.48996	1.32862	2.84232	3.21628	1.82396	2.25385
Cell_0208	AMPKARt2	Glucose 17 mM + Glutamine 2.500000e-01 mM + Insulin 10000 ng/ml	0.563903	0.639185	0.37566	0.608134	0.681353	0.445565	0.620302	0.367953	0.404139	0.601563	0.634834	0.618764	0.564893	0.583723	0.609267	0.603148	0.60699	0.696822	0.56171	0.526523	0.580862	0.591928	0.535891	0.329934	0.516501	0.508806	0.559391	0.601279	0.359599	0.575048	0.658392	0.572455	0.622417	0.522327	0.486562	0.585656	0.540736	0.589494	0.579264	0.550512	0.598604	0.485309	0.531	0.436953	0.412386	0.581779	0.588062
Cell_0209	TFEB_TR	Glucose 17 mM + Glutamine 2.500000e-01 mM + Insulin 10000 ng/ml	1.5982	1.52418	1.51938	1.29409	1.10246	1.69043	1.22973	1.09257	2.3469	0.587334	0.981731	1.67768	1.57106	2.36237	1.71118	1.58684	1.16324	1.52964	1.24859	1.15965	2.13599	1.89075	1.51228	2.2355	1.06243	1.06849	1.44716	1.33571	2.29376	1.51758	0.746687	1.26702	1.09508	0.770729	2.46312	1.15833	1.08039	1.05409	1.50369	1.44279	0.979787	0.904948	1.24886	2.4764	1.6903	1.19581	1.58089
Cell_0209	FOXO_TR	Glucose 17 mM + Glutamine 2.500000e-01 mM + Insulin 10000 ng/ml	1.40438	1.51699	2.30786	2.66268	1.87062	1.39883	1.13256	1.97145	2.9711	1.09003	1.32712	1.16316	2.45938	2.77348	1.41192	2.40121	1.34635	2.32306	2.29773	1.51859	1.68162	1.67487	1.95541	2.68451	1.65262	1.59222	1.80322	1.04939	1.8176	3.04484	1.62791	1.15845	1.02608	2.23807	3.16167	1.92715	1.22224	1.39437	2.88629	2.33807	2.14034	1.44206	1.36605	3.01261	3.3267	1.86362	2.16849
Cell_0209	AMPKARt2	Glucose 17 mM + Glutamine 2.500000e-01 mM + Insulin 10000 ng/ml	0.559156	0.639069	0.38645	0.60465	0.695696	0.445329	0.582522	0.383252	0.403406	0.59608	0.652465	0.617341	0.577469	0.584504	0.60483	0.602044	0.609786	0.721901	0.540486	0.539916	0.569597	0.563032	0.530229	0.318226	0.48486	0.529275	0.565324	0.623719	0.353995	0.577814	0.66423	0.582542	0.632864	0.508007	0.491721	0.583479	0.540133	0.602236	0.565823	0.543857	0.59615	0.493631	0.545436	0.471621	0.425005	0.585759	0.589762
Cell_0210	TFEB_TR	Glucose 17 mM + Glutamine 2.500000e-01 mM + Insulin 10000 ng/ml	1.50592	1.27454	1.63287	1.47596	1.03735	1.81932	1.17283	1.05515	2.28754	0.581183	1.00588	1.41756	1.5004	2.44672	1.99802	1.6682	1.00845	1.4147	1.31772	1.15252	1.83488	1.7226	1.12928	2.23619	1.073	0.887832	1.2396	1.41029	2.38338	1.65743	0.794321	1.26392	1.08675	0.819048	2.65151	1.22333	1.10421	1.0109	1.5742	1.32633	1.27332	1.06875	1.22458	2.93136	1.67411	1.29597	1.04194
Cell_0210	FOXO_TR	Glucose 17 mM + Glutamine 2.500000e-01 mM + Insulin 10000 ng/ml	1.3442	1.45017	2.22995	2.73161	1.93074	1.43722	1.15317	1.88979	2.87569	1.08457	1.31311	1.15434	2.5297	2.78734	1.51368	2.21529	1.31561	2.29872	2.40443	1.55034	1.60677	1.54202	2.11724	2.62348	1.63488	1.66008	1.73879	1.29137	1.87841	3.10699	1.66527	1.17038	0.988112	2.30338	3.08755	1.91082	1.17298	1.40202	2.83093	2.31201	2.11046	1.33055	1.45863	3.17827	3.40293	1.76146	2.0551
Cell_0210	AMPKARt2	Glucose 17 mM + Glutamine 2.500000e-01 mM + Insulin 10000 ng/ml	0.573408	0.645808	0.384534	0.600263	0.706892	0.449738	0.592466	0.395357	0.387215	0.598829	0.650535	0.617549	0.590909	0.578632	0.598328	0.604741	0.610003	0.740724	0.54075	0.543007	0.573818	0.579796	0.518733	0.312151	0.48102	0.53512	0.589646	0.629765	0.35219	0.580468	0.66514	0.575439	0.630259	0.521071	0.487866	0.572493	0.537507	0.59617	0.563897	0.53776	0.609013	0.540857	0.537064	0.488735	0.435053	0.586507	0.600876
Cell_0211	TFEB_TR	Glucose 17 mM + Glutamine 2.500000e-01 mM + Insulin 10000 ng/ml	1.45892	1.31647	1.5429	1.37349	1.11359	1.96716	1.0907	1.1245	2.48572	0.587607	0.705548	1.34185	1.43735	2.6394	1.66326	1.94477	1.11775	1.29714	1.36493	1.1804	1.81339	1.68233	0.864372	2.24744	1.00078	0.903069	1.29807	1.35364	2.48941	1.26115	0.72568	1.26936	1.11242	0.861729	2.56919	1.20426	1.20356	1.01989	1.63541	1.22261	1.41067	1.16106	1.24059	3.06501	1.39038	1.53992	1.24775
Cell_0211	FOXO_TR	Glucose 17 mM + Glutamine 2.500000e-01 mM + Insulin 10000 ng/ml	1.33425	1.51356	2.16483	2.79592	1.94475	1.47924	1.21313	2.01679	2.7321	1.09676	1.28661	1.0857	2.56523	2.77702	1.50556	2.17843	1.27522	2.29339	2.41526	1.62891	1.49077	1.44497	2.13383	2.60007	1.61583	1.68515	1.67343	1.8576	1.97031	1.47829	1.61015	1.15917	0.990701	2.36563	3.0093	1.8862	1.12164	1.4553	2.8599	2.26212	2.09372	1.27102	1.36925	3.22791	3.51364	1.69357	1.9683
Cell_0211	AMPKARt2	Glucose 17 mM + Glutamine 2.500000e-01 mM + Insulin 10000 ng/ml	0.580615	0.655905	0.379734	0.613451	0.70713	0.453898	0.618129	0.383364	0.364771	0.613008	0.643861	0.625294	0.584606	0.591884	0.593135	0.599575	0.60737	0.719008	0.556866	0.536112	0.571335	0.62463	0.514711	0.325953	0.514343	0.512675	0.586852	0.60078	0.347844	0.62208	0.651785	0.579865	0.650149	0.533787	0.476771	0.591168	0.537911	0.593328	0.569602	0.546793	0.615709	0.590605	0.51728	0.50435	0.435387	0.587165	0.601462
Cell_0212	TFEB_TR	Glucose 17 mM + Glutamine 2.500000e-01 mM + Insulin 10000 ng/ml	1.54047	1.74263	1.43725	1.3312	1.09022	1.89502	1.22533	1.23058	2.59623	0.580568	0.639725	1.46646	1.51535	2.62551	1.37498	2.01119	1.46717	1.20562	1.38974	1.23519	2.33116	1.6588	1.05497	2.28507	0.931072	1.04569	1.82517	1.24816	2.4859	1.73323	0.732347	1.25312	1.14093	0.883652	2.61215	1.20068	1.07401	1.09001	1.50381	1.09794	1.07074	1.08566	1.2466	2.63845	1.27654	1.28389	1.57258
Cell_0212	FOXO_TR	Glucose 17 mM + Glutamine 2.500000e-01 mM + Insulin 10000 ng/ml	1.36187	1.93835	2.2479	2.93085	1.98202	1.43447	1.19179	2.27404	2.63126	1.09621	1.302	1.07271	2.46475	2.85663	1.43725	2.22662	1.24921	2.31404	2.39781	1.71393	1.42154	1.36911	2.18026	2.67558	1.55613	1.60336	1.61877	2.19768	1.98675	1.40606	1.4957	1.12148	1.29816	2.37797	3.08101	1.93771	1.04798	1.50589	2.85579	2.21498	2.1344	1.24157	1.20321	3.18541	3.53059	1.75661	1.90916
Cell_0212	AMPKARt2	Glucose 17 mM + Glutamine 2.500000e-01 mM + Insulin 10000 ng/ml	0.597965	0.655095	0.38487	0.61004	0.701179	0.458327	0.618256	0.360529	0.369495	0.608268	0.653263	0.636757	0.568724	0.626229	0.595281	0.588748	0.603051	0.705819	0.54952	0.543274	0.566121	0.626866	0.517027	0.333768	0.53386	0.495039	0.582965	0.559566	0.346152	0.625586	0.624622	0.598505	0.659205	0.498449	0.485971	0.586744	0.541615	0.589741	0.551247	0.559215	0.606671	0.579641	0.504867	0.509067	0.442782	0.598379	0.582792
Cell_0213	TFEB_TR	Glucose 17 mM + Glutamine 2.500000e-01 mM + Insulin 10000 ng/ml	1.50004	1.89633	1.5406	0.951568	0.98946	1.86196	1.34653	1.27419	2.35444	0.565747	1.14396	1.67813	1.5813	2.45084	1.52682	1.79253	1.30431	1.18292	1.40444	1.26845	2.38047	1.66834	1.02724	2.32875	0.922069	1.05108	2.09725	1.19043	2.3687	1.8137	0.839431	1.33808	1.28971	0.94126	0.798465	1.15031	0.948821	1.12503	1.64343	1.13323	0.939882	1.10415	1.24199	2.21106	1.40391	0.968464	1.77057
Cell_0213	FOXO_TR	Glucose 17 mM + Glutamine 2.500000e-01 mM + Insulin 10000 ng/ml	1.33407	2.43454	2.34838	1.71295	2.14552	1.39507	1.15809	2.37035	2.58227	1.07022	1.36949	1.11505	2.41407	2.93954	1.44815	2.18912	1.25006	2.30247	2.36362	1.74655	1.42706	1.3573	2.18129	2.75749	1.52097	1.5763	1.56984	2.18489	1.95055	1.41237	1.49043	1.10403	1.84704	2.40359	1.62634	1.98424	1.011	1.50611	2.77714	2.17741	2.16471	1.21109	1.27387	3.1345	3.43108	1.78044	1.83823
Cell_0213	AMPKARt2	Glucose 17 mM + Glutamine 2.500000e-01 mM + Insulin 10000 ng/ml	0.649927	0.614136	0.389553	0.673067	0.686613	0.451568	0.624856	0.364787	0.388604	0.597542	0.659102	0.637259	0.562004	0.645454	0.59765	0.58258	0.599943	0.70979	0.522995	0.555231	0.56128	0.619951	0.521369	0.326644	0.523805	0.488418	0.614405	0.548282	0.363869	0.632322	0.595114	0.60027	0.60938	0.460133	0.594579	0.506107	0.544447	0.573901	0.534844	0.560498	0.601956	0.556624	0.507771	0.495089	0.444699	0.613837	0.563737
Cell_0214	TFEB_TR	Glucose 17 mM + Glutamine 2.500000e-01 mM + Insulin 10000 ng/ml	1.31377	1.7347	1.66551	0.874853	1.06142	1.99339	1.3563	1.25668	2.39076	0.566186	1.43847	1.64086	1.50076	2.29791	1.57502	1.77387	0.968423	1.25306	1.40087	1.24856	1.99102	1.74029	1.15413	2.33144	0.962894	1.1431	1.73023	1.27281	2.28696	1.83084	0.871479	1.45721	1.45508	1.01373	0.810611	1.09634	1.02858	1.1717	1.91636	1.26836	1.01256	1.10301	1.18587	2.31906	1.52277	1.13962	1.94407
Cell_0214	FOXO_TR	Glucose 17 mM + Glutamine 2.500000e-01 mM + Insulin 10000 ng/ml	1.25946	2.58044	2.35009	1.76059	2.27225	1.40216	1.5224	2.33081	2.56609	1.06158	1.39081	1.08108	2.42911	2.79854	1.50711	2.14534	1.2553	2.28624	2.26067	1.72451	1.45798	1.45355	2.13041	2.74758	1.6208	1.64811	1.52523	2.23342	1.92616	1.48769	1.5572	1.10398	2.25686	2.45634	1.67816	1.99469	1.05009	1.76514	2.8047	2.18288	2.12395	1.21531	1.27054	3.15339	3.45139	1.71408	1.78058
Cell_0214	AMPKARt2	Glucose 17 mM + Glutamine 2.500000e-01 mM + Insulin 10000 ng/ml	0.685592	0.551467	0.396938	0.666163	0.652963	0.440646	0.655416	0.393251	0.387258	0.608146	0.654942	0.629073	0.56119	0.637634	0.597001	0.587193	0.601924	0.699548	0.514783	0.557237	0.55482	0.634494	0.517967	0.320492	0.523828	0.481946	0.631557	0.565404	0.380367	0.635907	0.576078	0.594239	0.57522	0.4821	0.598182	0.421187	0.542687	0.568755	0.544862	0.572052	0.594908	0.573609	0.51643	0.491726	0.443976	0.61926	0.568618
Cell_0215	TFEB_TR	Glucose 17 mM + Glutamine 2.500000e-01 mM + Insulin 10000 ng/ml	1.19111	1.77696	1.58739	0.864068	1.1534	1.94621	1.37149	1.22771	0.767973	0.575472	1.11085	1.41658	1.54617	2.11901	1.52596	1.88874	1.05865	1.29834	1.39704	1.24527	1.82849	1.72521	1.47087	2.31026	1.03179	1.41898	1.44534	1.4479	2.32354	2.00126	0.906058	1.47976	1.46522	1.03565	0.776175	1.28557	1.11394	1.28624	1.75958	4.18333	1.02061	0.987391	1.06584	2.76356	1.50829	1.33702	1.91447
Cell_0215	FOXO_TR	Glucose 17 mM + Glutamine 2.500000e-01 mM + Insulin 10000 ng/ml	1.22326	2.47117	2.30651	1.88271	2.24105	1.37009	2.29901	2.29647	1.28064	1.10648	1.32892	1.03236	2.39865	2.57896	1.54795	2.14123	1.30578	2.2912	2.20597	1.75277	1.46101	1.45194	2.10241	2.71507	1.77788	1.65508	1.52166	2.41748	1.93541	1.50412	1.47287	1.11591	2.34834	2.51566	1.70017	2.01133	1.05674	2.24728	2.89122	1.84567	2.03647	1.20557	1.16349	3.21594	3.53689	1.69062	1.77228
Cell_0215	AMPKARt2	Glucose 17 mM + Glutamine 2.500000e-01 mM + Insulin 10000 ng/ml	0.673344	0.522024	0.412875	0.680247	0.608459	0.445632	0.672518	0.406182	0.609169	0.610614	0.657132	0.639961	0.565472	0.633354	0.599707	0.584024	0.606557	0.696233	0.520634	0.551875	0.554523	0.6345	0.507103	0.323905	0.52724	0.481449	0.62478	0.585822	0.366766	0.632863	0.571207	0.596262	0.602052	0.495739	0.612725	0.383057	0.536819	0.559067	0.544271	0.594702	0.559268	0.585087	0.527444	0.503941	0.453276	0.615734	0.584635
Cell_0216	TFEB_TR	Glucose 17 mM + Glutamine 2.500000e-01 mM + Insulin 10000 ng/ml	1.16911	1.87204	1.52009	0.957132	1.18879	1.76565	1.36366	1.24895	0.842958	0.576428	0.882679	1.33805	1.73067	2.03506	1.49329	1.84616	1.2321	1.26287	1.41735	1.28256	1.89293	1.7734	1.35658	2.30041	1.04583	1.42393	1.43148	1.57643	2.38655	1.96155	1.00382	1.55654	1.34239	1.06207	0.780197	1.67379	1.13315	1.36932	1.40091	4.07236	1.31738	0.972946	1.09404	2.97601	1.4942	1.28881	1.94181
Cell_0216	FOXO_TR	Glucose 17 mM + Glutamine 2.500000e-01 mM + Insulin 10000 ng/ml	1.2267	2.43327	2.27183	1.97502	2.16324	1.34602	2.80704	2.36082	1.26856	1.14173	1.26143	1.33902	2.33291	2.55962	1.55933	2.06411	1.38258	2.30965	2.24697	1.82218	1.45701	1.41769	2.07507	2.72076	1.84049	1.61349	1.56005	2.5294	1.96505	1.46901	1.30033	1.14216	2.25356	2.54023	1.70193	1.97882	0.994675	2.44754	2.87177	1.85588	1.96903	1.1736	1.78377	3.26871	3.43837	1.70769	1.79143
Cell_0216	AMPKARt2	Glucose 17 mM + Glutamine 2.500000e-01 mM + Insulin 10000 ng/ml	0.657037	0.520381	0.414579	0.694825	0.571145	0.444014	0.669214	0.399742	0.594832	0.582283	0.663452	0.629631	0.580293	0.642507	0.591518	0.560408	0.618802	0.704131	0.513861	0.544425	0.553742	0.625608	0.50688	0.337973	0.521224	0.485521	0.632647	0.597836	0.348342	0.623395	0.566314	0.599904	0.621628	0.452607	0.616336	0.344916	0.542846	0.498658	0.52431	0.612502	0.521928	0.579819	0.545892	0.496435	0.457654	0.607074	0.590051
Cell_0217	TFEB_TR	Glucose 17 mM + Glutamine 2.500000e-01 mM + Insulin 10000 ng/ml	1.16393	1.80381	1.64579	1.04883	1.35313	1.77978	1.34157	1.3347	0.968779	0.590095	0.99077	1.57063	1.73511	0.761727	1.55216	1.87609	1.21504	1.32712	1.43555	1.28292	1.93609	1.87358	1.18532	2.28398	1.021	1.18596	1.27258	1.57124	2.33799	1.61358	1.03459	1.65184	1.22681	1.11947	0.830904	1.77608	1.10925	1.49517	1.39173	4.07932	1.47806	1.02539	1.31289	2.75215	1.24854	1.36501	1.9646
Cell_0217	FOXO_TR	Glucose 17 mM + Glutamine 2.500000e-01 mM + Insulin 10000 ng/ml	1.25582	2.53754	2.25831	2.07176	2.09056	1.38652	2.75208	2.54572	1.29101	1.10907	1.23204	2.03903	2.25777	1.6354	1.4835	1.96761	1.46282	2.30833	2.24819	1.79126	1.48827	1.52089	2.0606	2.71283	1.81489	1.60828	1.55078	2.57208	1.97295	1.53636	1.28038	1.14915	2.24221	2.52301	1.69315	1.8778	0.970332	2.41468	2.79049	1.94746	1.93848	1.19001	2.90289	3.25854	1.70428	1.69194	1.81217
Cell_0217	AMPKARt2	Glucose 17 mM + Glutamine 2.500000e-01 mM + Insulin 10000 ng/ml	0.660821	0.516245	0.406116	0.695994	0.544834	0.420864	0.671594	0.397642	0.598651	0.547257	0.666444	0.551314	0.583062	0.682627	0.570066	0.564714	0.639309	0.692244	0.508463	0.548827	0.542925	0.621889	0.518122	0.346324	0.521305	0.486701	0.624692	0.592713	0.355419	0.616198	0.555194	0.609212	0.617808	0.441112	0.605622	0.311276	0.561319	0.426211	0.523334	0.617315	0.526164	0.585746	0.547729	0.475108	0.555113	0.590079	0.596089
Cell_0218	TFEB_TR	Glucose 17 mM + Glutamine 2.500000e-01 mM + Insulin 10000 ng/ml	1.14254	1.89173	1.66842	1.00992	1.44878	1.91585	1.39624	1.40526	0.859673	0.658494	1.00564	1.97072	1.70446	0.774964	2.07865	2.00008	1.20116	1.50207	1.43458	1.25687	1.82829	1.69761	1.17853	2.24119	1.08339	1.11848	1.34284	1.51637	2.26044	1.44026	1.05511	1.55566	1.26259	1.13458	0.808043	1.51423	1.01787	1.78821	1.55822	4.03326	1.07531	1.017	1.41731	2.37274	1.219	1.58855	1.74065
Cell_0218	FOXO_TR	Glucose 17 mM + Glutamine 2.500000e-01 mM + Insulin 10000 ng/ml	1.32955	2.67558	2.20044	2.20977	1.99595	1.41105	2.6514	2.66698	1.34313	1.08591	1.25913	2.53345	2.18312	1.6241	1.35522	1.94283	1.72615	2.28453	2.21247	1.68628	1.49358	1.47961	2.08486	2.66764	1.76641	1.55102	1.49729	2.55407	1.97858	1.62689	1.34645	1.14099	2.34568	2.53678	1.65641	1.80136	0.962535	2.50273	2.73363	2.00943	1.90077	1.22381	3.30303	3.17185	1.8129	1.68111	1.79815
Cell_0218	AMPKARt2	Glucose 17 mM + Glutamine 2.500000e-01 mM + Insulin 10000 ng/ml	0.667069	0.523653	0.415863	0.690703	0.538158	0.419395	0.673855	0.398268	0.617661	0.521287	0.661863	0.479391	0.555959	0.68007	0.560997	0.614242	0.638977	0.677491	0.51932	0.564382	0.540802	0.622321	0.520053	0.34331	0.519483	0.480154	0.599598	0.572532	0.367735	0.621163	0.553542	0.612255	0.617588	0.486792	0.602757	0.315253	0.567204	0.409195	0.535639	0.618228	0.558631	0.582107	0.520282	0.47698	0.546325	0.570208	0.60448
Cell_0219	TFEB_TR	Glucose 17 mM + Glutamine 2.500000e-01 mM + Insulin 10000 ng/ml	1.09987	2.13491	1.48765	0.919297	1.27656	2.00615	1.43851	1.40401	0.734165	0.780263	0.992472	1.9741	1.79067	0.763013	2.41817	1.98169	1.29041	1.54008	1.02877	1.26394	1.7397	1.58607	1.00258	2.16252	1.18697	1.08862	1.74056	1.56211	2.30394	1.52364	1.10375	1.53876	1.37086	1.10576	0.757912	1.62831	1.03295	1.87547	1.52236	3.78096	0.925266	1.00878	1.477	2.10413	1.23025	1.58681	1.73894
Cell_0219	FOXO_TR	Glucose 17 mM + Glutamine 2.500000e-01 mM + Insulin 10000 ng/ml	1.35874	2.76864	2.06582	2.17434	1.91955	1.41549	2.75814	2.65454	1.37792	1.11053	1.31045	2.43427	2.17835	1.6005	1.28821	1.89525	2.13956	2.31736	1.42817	1.64421	1.45601	1.42057	2.11533	2.61114	1.73683	1.46675	1.47919	2.4828	1.99803	1.57125	1.30243	1.15835	2.29252	2.59243	1.61445	1.76363	0.906613	2.54215	2.74174	1.99351	1.8456	1.2523	3.15359	3.11642	1.74113	1.66764	1.73071
Cell_0219	AMPKARt2	Glucose 17 mM + Glutamine 2.500000e-01 mM + Insulin 10000 ng/ml	0.67349	0.544089	0.427609	0.682839	0.563918	0.442242	0.666174	0.390507	0.631491	0.505822	0.649581	0.475044	0.53419	0.694219	0.569589	0.637572	0.610953	0.678561	0.514382	0.559478	0.545392	0.641907	0.507729	0.364454	0.521945	0.47184	0.610207	0.563646	0.362787	0.62548	0.560365	0.600774	0.603887	0.506832	0.608464	0.312388	0.560265	0.420598	0.532037	0.617235	0.576426	0.574265	0.501434	0.48941	0.555032	0.557121	0.606091
Cell_0220	TFEB_TR	Glucose 17 mM + Glutamine 2.500000e-01 mM + Insulin 10000 ng/ml	1.07147	2.3984	1.46459	0.957959	1.19126	2.04644	1.33644	1.35494	0.924078	0.923418	1.09431	1.47855	1.76837	0.754477	1.88168	1.94856	1.28866	1.46723	1.01261	1.28325	1.89531	1.89951	1.0519	2.03391	1.21157	1.06225	1.67617	1.57934	2.33983	1.43928	1.06784	1.72771	1.44308	1.08693	0.788675	2.15376	1.20106	1.57322	1.54024	3.47934	1.07324	1.00338	1.6389	2.09187	1.15783	1.29435	1.83037
Cell_0220	FOXO_TR	Glucose 17 mM + Glutamine 2.500000e-01 mM + Insulin 10000 ng/ml	1.33963	2.86116	2.02904	2.02261	1.87499	1.43341	2.80282	2.60776	1.36697	1.10573	1.27147	2.09553	2.21484	1.57289	1.23511	1.81099	2.31141	2.38057	1.40728	1.63865	1.4537	1.86206	2.14909	2.55683	1.78415	1.46627	1.4261	2.488	1.98391	1.51886	1.21597	1.15505	2.19295	2.63254	1.60903	1.7124	0.887142	2.4359	2.83593	2.00999	1.81996	1.31106	3.25929	3.17638	1.62304	1.59432	1.70787
Cell_0220	AMPKARt2	Glucose 17 mM + Glutamine 2.500000e-01 mM + Insulin 10000 ng/ml	0.688321	0.556635	0.426669	0.684589	0.599071	0.440948	0.663421	0.382866	0.625452	0.498176	0.652224	0.487601	0.545152	0.698851	0.577944	0.624759	0.591238	0.670457	0.508225	0.523284	0.529076	0.629332	0.497484	0.409578	0.549704	0.473857	0.636126	0.58109	0.35033	0.622253	0.559983	0.601707	0.584234	0.492644	0.61162	0.294863	0.556132	0.425714	0.523004	0.609444	0.563705	0.596084	0.508202	0.482286	0.572732	0.558351	0.61472
Cell_0221	TFEB_TR	Glucose 17 mM + Glutamine 2.500000e-01 mM + Insulin 10000 ng/ml	1.09977	2.8126	1.6025	1.09889	1.31769	2.03689	1.28384	1.29167	1.06577	1.06352	1.08808	1.37068	1.74904	0.74157	1.3938	1.96167	1.04313	1.477	1.03328	1.31214	2.0151	2.04354	1.46776	0.970333	1.17907	1.22456	1.28507	1.45275	2.217	1.40941	1.05099	1.69661	1.58702	1.09756	0.803069	2.11413	1.19033	1.48161	1.75486	3.35209	0.865249	0.994047	1.57131	2.40454	1.03626	1.19616	1.58213
Cell_0221	FOXO_TR	Glucose 17 mM + Glutamine 2.500000e-01 mM + Insulin 10000 ng/ml	1.39038	3.00968	2.16174	2.08028	1.83081	1.42548	2.77572	2.45746	1.33033	1.07758	1.19284	2.00156	2.20701	1.53982	1.15554	1.78324	2.1899	2.35626	1.39193	1.56833	1.4437	2.38191	2.18259	1.98235	1.8643	1.46553	1.42963	2.54722	1.93265	1.60324	1.19083	1.0896	2.35916	2.67465	1.61823	1.68795	0.911367	2.49295	2.90357	2.07379	1.8326	1.31698	3.38493	3.22029	1.56917	1.53214	1.78937
Cell_0221	AMPKARt2	Glucose 17 mM + Glutamine 2.500000e-01 mM + Insulin 10000 ng/ml	0.69796	0.568379	0.430468	0.696407	0.614822	0.427541	0.662875	0.386914	0.609003	0.483972	0.674244	0.484265	0.555811	0.686636	0.571355	0.636099	0.580117	0.653395	0.512542	0.486829	0.512068	0.538356	0.493721	0.431573	0.559499	0.46936	0.646469	0.6013	0.351568	0.627897	0.555242	0.609882	0.584552	0.495884	0.616525	0.310137	0.55261	0.455813	0.522203	0.609942	0.55544	0.610944	0.5176	0.471599	0.579078	0.573901	0.626502
Cell_0222	TFEB_TR	Glucose 17 mM + Glutamine 2.500000e-01 mM + Insulin 10000 ng/ml	1.14932	3.09662	1.58112	1.13196	1.28411	2.04827	1.50694	1.27623	0.937906	1.17833	0.933829	1.8688	1.82293	0.726172	1.41054	1.7852	0.937856	1.46099	1.04007	1.37491	1.76795	1.81423	1.58647	0.939459	1.14483	1.26123	1.42372	1.40616	2.0659	1.8028	1.08549	1.5099	1.66621	1.10725	0.798702	1.7325	0.972719	1.7836	1.64669	3.4595	0.870846	1.01378	1.43183	2.65166	1.07061	1.55458	1.56011
Cell_0222	FOXO_TR	Glucose 17 mM + Glutamine 2.500000e-01 mM + Insulin 10000 ng/ml	1.4075	3.09848	2.23417	2.19734	1.80507	1.44745	2.79586	2.32585	1.30909	1.08367	1.22707	2.18068	2.22751	1.52236	1.1392	1.73817	2.08545	2.305	1.38288	1.44592	1.3879	2.39664	2.17589	1.92095	1.85912	1.40789	1.83816	2.5554	1.86374	1.6308	1.14991	1.0525	2.48689	2.71994	1.64441	1.7119	0.902817	2.66906	2.8475	2.09785	1.84093	1.2233	3.35292	3.06403	1.56118	1.5481	1.84512
Cell_0222	AMPKARt2	Glucose 17 mM + Glutamine 2.500000e-01 mM + Insulin 10000 ng/ml	0.690272	0.577845	0.429794	0.695366	0.622763	0.430953	0.655065	0.394244	0.601658	0.469811	0.68182	0.481724	0.541636	0.684043	0.557543	0.656911	0.551768	0.656088	0.522408	0.472705	0.52213	0.457253	0.485678	0.450887	0.51979	0.449265	0.637269	0.602836	0.374974	0.638248	0.553674	0.609623	0.58938	0.507704	0.624959	0.313756	0.552591	0.498779	0.528469	0.622525	0.573834	0.587979	0.519737	0.473664	0.57031	0.585518	0.628427
Cell_0223	TFEB_TR	Glucose 17 mM + Glutamine 2.500000e-01 mM + Insulin 10000 ng/ml	1.16405	3.02531	1.46973	1.04632	1.13124	2.13877	1.72791	1.3291	0.821175	1.26324	0.809177	2.05542	1.77388	0.751297	1.38631	1.5012	1.20396	1.30825	1.02938	1.44108	1.51925	1.78585	1.3459	0.935414	1.16446	1.11527	1.92455	1.46604	1.2684	2.12641	1.04313	1.58578	1.48456	1.0669	0.90027	1.90556	0.913579	1.91496	1.27268	3.55207	1.31399	1.02643	1.72003	2.47246	1.23255	1.7187	1.76445
Cell_0223	FOXO_TR	Glucose 17 mM + Glutamine 2.500000e-01 mM + Insulin 10000 ng/ml	1.43146	3.07128	2.15915	2.14618	1.81734	1.51627	2.74985	2.47315	1.33758	1.08761	1.28116	2.37596	2.27875	1.52787	1.14071	1.60679	2.07228	2.31661	1.37524	1.34525	1.35922	2.27373	2.13786	2.00625	1.79347	1.39008	2.50539	2.52436	1.27809	1.52684	1.09381	1.08152	2.28844	2.70691	1.73317	1.69112	0.909776	2.65885	2.77568	2.07877	1.80037	1.16453	3.39595	2.85601	1.60646	1.56375	1.82289
Cell_0223	AMPKARt2	Glucose 17 mM + Glutamine 2.500000e-01 mM + Insulin 10000 ng/ml	0.687252	0.566531	0.422724	0.688878	0.629493	0.427448	0.653335	0.389601	0.604531	0.475642	0.669502	0.483197	0.529129	0.690421	0.553672	0.652659	0.530501	0.672602	0.523496	0.465664	0.533605	0.447302	0.475512	0.453203	0.49072	0.448369	0.568105	0.600274	0.555815	0.634995	0.555844	0.624275	0.586342	0.506121	0.622381	0.294225	0.558356	0.502459	0.539439	0.621375	0.569827	0.580903	0.515264	0.467234	0.576752	0.583056	0.635834
Cell_0224	TFEB_TR	Glucose 17 mM + Glutamine 2.500000e-01 mM + Insulin 10000 ng/ml	1.19607	3.07411	1.47813	1.06436	1.16299	2.22877	1.61886	1.339	0.795312	1.32593	0.813613	1.90967	1.79546	0.791481	1.47343	1.54356	1.32838	1.20718	1.05077	1.52091	1.9405	1.92654	1.13359	0.942133	1.27511	1.14283	2.08709	1.50998	1.28992	2.03532	1.10723	1.76671	1.34581	1.02903	0.970255	2.02446	1.00994	1.8893	1.3761	3.31859	1.33333	1.03289	1.96997	2.32235	1.26571	1.35491	1.56048
Cell_0224	FOXO_TR	Glucose 17 mM + Glutamine 2.500000e-01 mM + Insulin 10000 ng/ml	1.86078	3.09758	2.12639	2.1949	1.83796	1.4753	2.69251	2.62443	1.38755	1.06837	1.26212	2.46906	2.20595	1.54002	1.0795	1.51218	2.09141	2.33094	1.37525	1.30825	1.31533	2.24681	2.13726	2.08535	1.75333	1.40802	2.87479	2.48252	1.30569	1.45074	1.09952	1.09444	2.08819	2.70208	1.82926	1.59724	0.900736	2.58321	2.77659	2.04866	1.69836	1.22309	3.35504	2.87705	1.63893	1.51094	1.82209
Cell_0224	AMPKARt2	Glucose 17 mM + Glutamine 2.500000e-01 mM + Insulin 10000 ng/ml	0.698985	0.553711	0.435071	0.697378	0.626146	0.418254	0.655918	0.380508	0.60642	0.48503	0.662988	0.48799	0.535487	0.688078	0.546951	0.647074	0.541415	0.672942	0.509243	0.450848	0.538372	0.452658	0.467383	0.462187	0.500956	0.471718	0.464712	0.607178	0.56629	0.621362	0.556877	0.636007	0.583299	0.513214	0.606199	0.373361	0.560107	0.48624	0.539289	0.609862	0.538683	0.608344	0.507374	0.454213	0.599284	0.575537	0.642226
Cell_0225	TFEB_TR	Glucose 17 mM + Glutamine 2.500000e-01 mM + Insulin 10000 ng/ml	1.33798	3.3989	0.994035	1.18323	1.20206	2.32787	1.3847	1.29547	0.834954	1.39182	0.917521	2.0223	1.9107	0.791065	1.63598	1.88948	1.183	1.27843	1.07861	1.6628	2.60574	1.96344	0.97483	0.9177	1.37508	1.18152	1.84853	1.59787	1.25281	1.80331	1.27218	1.80541	1.38619	0.523137	0.885342	1.65844	1.08659	2.1673	1.7645	3.15502	1.0647	1.02272	1.76532	2.47879	1.0934	1.11829	1.34582
Cell_0225	FOXO_TR	Glucose 17 mM + Glutamine 2.500000e-01 mM + Insulin 10000 ng/ml	2.59121	3.17595	1.41793	2.3325	1.84067	1.43277	2.75495	2.57565	1.39145	1.08794	1.27334	2.50146	2.07588	1.57906	1.04479	1.47583	2.17442	2.33805	1.38328	1.32847	1.2628	2.16699	2.19426	2.06226	1.72201	1.37869	2.89006	2.47168	1.3096	1.38732	1.08774	1.10336	2.08354	1.22904	1.84959	1.51812	0.857481	2.64406	2.79731	2.00233	1.62791	1.29821	3.267	3.01171	1.6059	1.43839	1.82149
Cell_0225	AMPKARt2	Glucose 17 mM + Glutamine 2.500000e-01 mM + Insulin 10000 ng/ml	0.690443	0.560448	0.544174	0.702138	0.62939	0.429122	0.645065	0.380457	0.607298	0.477838	0.664114	0.493041	0.543203	0.686502	0.539647	0.651455	0.55657	0.662556	0.49862	0.443883	0.557172	0.449525	0.458918	0.46571	0.499526	0.483293	0.427959	0.611371	0.562411	0.606533	0.551358	0.611542	0.578275	0.709878	0.595661	0.518746	0.566653	0.485375	0.525689	0.619618	0.54253	0.616316	0.503768	0.464911	0.590778	0.570428	0.632162
Cell_0226	TFEB_TR	Glucose 17 mM + Glutamine 2.500000e-01 mM + Insulin 10000 ng/ml	1.46478	3.57369	1.03767	1.17815	1.11478	2.50377	1.39851	1.33038	0.953992	1.50081	1.05937	1.94596	1.72063	0.759158	1.39598	1.91437	1.16925	1.4343	1.08324	1.78625	2.43141	2.03841	0.99035	0.934634	1.37332	1.06162	1.70373	1.58859	1.26369	1.70492	1.16247	1.73961	1.36011	0.533645	0.829215	1.57589	1.20025	2.54586	1.81119	3.52231	1.078	0.934481	1.84965	2.43253	0.973012	1.18152	1.42965
Cell_0226	FOXO_TR	Glucose 17 mM + Glutamine 2.500000e-01 mM + Insulin 10000 ng/ml	3.00145	3.14846	1.50643	2.19132	1.83084	1.72803	2.7898	2.66796	1.37934	1.14419	1.24528	2.46875	2.07754	1.60937	1.05327	1.40603	2.24585	2.37765	1.38005	1.34053	1.32127	2.2742	2.23207	2.0957	1.68504	1.34157	2.84369	2.47467	1.34698	1.25237	1.00991	1.15038	2.17221	1.27991	1.82095	1.50695	1.10485	2.67351	2.81937	1.9708	1.65619	1.24545	3.36473	3.06653	1.596	1.41861	1.81056
Cell_0226	AMPKARt2	Glucose 17 mM + Glutamine 2.500000e-01 mM + Insulin 10000 ng/ml	0.656895	0.565406	0.528597	0.689314	0.641426	0.445987	0.626719	0.38167	0.614314	0.471585	0.671385	0.492534	0.542878	0.697114	0.56005	0.656768	0.561088	0.67197	0.511116	0.445562	0.569169	0.457659	0.46261	0.452173	0.485068	0.477721	0.461105	0.607331	0.569158	0.593414	0.554317	0.595398	0.570742	0.723772	0.587029	0.558002	0.587878	0.481104	0.519141	0.635057	0.552899	0.607718	0.499741	0.478507	0.578325	0.573465	0.632439
Cell_0227	TFEB_TR	Glucose 17 mM + Glutamine 2.500000e-01 mM + Insulin 10000 ng/ml	1.41322	3.52096	1.00473	1.14256	1.13698	2.56871	1.64884	2.03124	0.986056	1.58613	1.18769	1.65314	1.55937	0.752439	1.17158	1.56689	1.13789	1.55085	1.09344	1.79891	1.96728	2.02045	1.22387	1.06521	1.35208	1.05251	2.05111	1.46126	1.30108	2.00278	0.974953	1.54732	1.3909	0.547079	0.900558	1.61364	1.23934	2.60546	0.896479	3.95014	1.06769	0.837059	2.36525	2.17989	1.0618	1.22234	1.46382
Cell_0227	FOXO_TR	Glucose 17 mM + Glutamine 2.500000e-01 mM + Insulin 10000 ng/ml	2.94625	3.14428	1.45048	1.98076	1.84151	2.23941	2.74968	1.63238	1.41376	1.14024	1.18191	2.41334	2.18462	1.59862	1.02643	1.35295	2.21088	2.42509	1.37103	1.29317	1.37723	2.59455	2.21071	2.22024	1.66594	1.35895	2.84337	2.4563	1.37149	1.14958	0.976642	1.15585	2.30358	1.35111	1.77566	1.54273	1.67767	2.61744	1.9098	1.99927	1.64242	1.20982	3.39016	3.10116	1.61996	1.4524	1.83492
Cell_0227	AMPKARt2	Glucose 17 mM + Glutamine 2.500000e-01 mM + Insulin 10000 ng/ml	0.644414	0.558151	0.527045	0.670573	0.639973	0.460482	0.613681	0.498287	0.623028	0.47318	0.69295	0.494912	0.541944	0.706304	0.580619	0.659635	0.565687	0.690222	0.526746	0.430799	0.559318	0.473138	0.474785	0.4549	0.503116	0.472243	0.491343	0.606076	0.58047	0.583766	0.566604	0.620017	0.567143	0.717628	0.555146	0.534162	0.603913	0.468525	0.637766	0.621554	0.522697	0.623548	0.49467	0.461339	0.605168	0.577481	0.64608
Cell_0228	TFEB_TR	Glucose 17 mM + Glutamine 2.500000e-01 mM + Insulin 10000 ng/ml	1.37955	3.45663	0.948804	1.35677	1.22763	2.41702	1.68604	1.68086	0.917745	1.57176	1.11296	1.77369	1.81775	0.809815	1.35191	1.59102	0.942695	1.46085	1.09249	1.80177	2.20475	1.90703	1.27472	1.16749	1.36675	1.18576	2.59834	1.48452	1.27009	2.42096	1.10046	1.36473	1.59301	0.559137	1.00587	1.3554	1.13672	2.42877	1.65053	4.1014	1.01727	0.799602	2.2911	2.15974	1.11094	1.31012	1.65898
Cell_0228	FOXO_TR	Glucose 17 mM + Glutamine 2.500000e-01 mM + Insulin 10000 ng/ml	2.796	3.24654	1.37268	2.0828	1.88438	2.53852	2.75143	1.78054	1.43325	1.07568	1.4897	2.46695	2.3292	1.6418	1.01195	1.32263	2.15271	2.46168	1.37611	1.24417	1.37101	2.71983	2.20013	2.27669	1.62709	1.3656	2.93336	2.50318	1.33162	1.13082	0.995004	1.11863	2.39872	1.40375	1.69329	1.5752	2.02205	2.63279	1.85018	2.05842	1.53798	1.60768	3.28852	3.04975	1.60116	1.49651	1.74109
Cell_0228	AMPKARt2	Glucose 17 mM + Glutamine 2.500000e-01 mM + Insulin 10000 ng/ml	0.658976	0.555247	0.553374	0.647804	0.63978	0.473693	0.607537	0.504193	0.621457	0.463551	0.699513	0.499908	0.542839	0.700463	0.577832	0.656277	0.561273	0.685796	0.522988	0.410488	0.55795	0.494288	0.472266	0.469014	0.525448	0.46809	0.507158	0.608098	0.572876	0.578543	0.557412	0.643059	0.56583	0.712133	0.512809	0.559558	0.600252	0.469478	0.660926	0.597039	0.509852	0.621061	0.498807	0.451437	0.589502	0.580406	0.643456
Cell_0229	TFEB_TR	Glucose 17 mM + Glutamine 2.500000e-01 mM + Insulin 10000 ng/ml	1.4914	3.44764	0.939272	1.68696	1.19292	2.37261	1.3749	2.30223	0.887078	1.57731	0.896233	1.74242	0.760235	0.873808	1.44394	1.98312	0.971994	1.23769	1.06327	1.88307	2.27763	2.08692	1.11187	1.11098	1.35906	1.21075	2.77594	1.54933	1.2528	2.15867	1.24782	1.38442	1.63341	0.563961	1.09342	1.40789	1.1017	2.15815	1.37752	4.08734	1.19831	0.782941	1.76091	0.76867	0.986584	1.30027	2.05421
Cell_0229	FOXO_TR	Glucose 17 mM + Glutamine 2.500000e-01 mM + Insulin 10000 ng/ml	2.80773	3.19655	1.36802	2.23347	1.88595	2.58842	2.76186	1.6833	1.39801	1.07157	2.15059	2.58455	1.92601	1.7145	1.04944	1.33906	2.15395	2.47142	1.38072	1.25143	1.42006	2.62811	2.22801	2.22821	1.54254	1.33809	3.07511	2.52874	1.34379	1.12051	0.9889	1.13216	2.46873	1.39928	1.58735	1.56135	2.02227	2.61114	1.84653	2.07353	1.54106	2.33974	3.3474	1.49534	1.55161	1.53041	1.64761
Cell_0229	AMPKARt2	Glucose 17 mM + Glutamine 2.500000e-01 mM + Insulin 10000 ng/ml	0.66332	0.556099	0.567032	0.62568	0.654977	0.462719	0.608266	0.497997	0.61043	0.452205	0.669435	0.495499	0.675375	0.682977	0.587571	0.663768	0.552697	0.674078	0.516079	0.406568	0.560692	0.515281	0.473741	0.463978	0.506499	0.459056	0.533563	0.602636	0.561706	0.580072	0.542538	0.642003	0.563145	0.719943	0.489891	0.564669	0.592423	0.478882	0.660582	0.583196	0.535345	0.552547	0.504013	0.620111	0.505862	0.602825	0.636134
Cell_0230	TFEB_TR	Glucose 17 mM + Glutamine 2.500000e-01 mM + Insulin 10000 ng/ml	1.50956	3.45341	0.95362	1.84531	1.14858	2.51487	1.28251	2.5179	0.890905	1.66066	0.991854	1.81374	0.720188	0.889982	1.24593	2.03621	1.1486	1.22954	1.06362	1.94127	1.70074	2.23288	1.04409	1.00812	1.36991	1.05439	2.5772	1.62553	1.31246	1.3817	1.16727	1.40947	1.48507	0.56412	1.14846	1.72465	1.08761	1.92694	1.2864	3.7469	1.27242	0.830277	1.95094	0.827098	0.919884	1.11721	2.0323
Cell_0230	FOXO_TR	Glucose 17 mM + Glutamine 2.500000e-01 mM + Insulin 10000 ng/ml	2.92166	3.03052	1.39581	2.11076	1.79667	2.59757	2.82434	1.57427	1.38595	1.13672	2.51309	2.61853	1.96931	1.70393	1.05414	1.73836	2.22194	2.45903	1.38089	1.25979	1.36957	2.55602	2.2392	2.16682	1.4779	1.36556	3.13447	2.43923	1.42497	1.12428	0.991775	1.15624	2.60614	1.3661	1.50376	1.51499	2.06053	2.49724	1.88801	2.02128	1.64482	2.72151	3.37675	1.48219	1.46952	1.55381	2.09413
Cell_0230	AMPKARt2	Glucose 17 mM + Glutamine 2.500000e-01 mM + Insulin 10000 ng/ml	0.653638	0.55283	0.552392	0.618549	0.658228	0.441788	0.608829	0.497744	0.595543	0.459096	0.659396	0.484502	0.684588	0.660728	0.601343	0.676425	0.555622	0.678272	0.515256	0.400064	0.55237	0.520887	0.493189	0.453119	0.489651	0.449949	0.551371	0.59083	0.564949	0.584822	0.55649	0.639792	0.561637	0.727155	0.482076	0.525361	0.596512	0.477866	0.651064	0.568537	0.553539	0.47596	0.496716	0.624658	0.467877	0.619464	0.634786
Cell_0231	TFEB_TR	Glucose 17 mM + Glutamine 2.500000e-01 mM + Insulin 10000 ng/ml	1.47446	3.3152	0.965638	1.88619	1.21429	2.49222	1.49159	1.8975	1.05435	1.68504	1.22343	3.11689	0.760429	0.959397	1.25005	1.88864	1.09162	1.33777	1.10053	1.90168	1.65152	1.96385	1.02719	1.00514	1.43965	0.941097	2.22017	1.88935	1.37519	1.10571	1.07549	1.36278	1.49775	0.564513	1.1851	1.7795	1.05748	2.1167	1.53394	3.45764	1.16166	0.910153	2.55343	0.820447	0.952554	1.19408	1.67031
Cell_0231	FOXO_TR	Glucose 17 mM + Glutamine 2.500000e-01 mM + Insulin 10000 ng/ml	2.96896	3.07053	1.48004	1.88073	1.70146	2.58196	3.00541	1.57692	1.40069	1.15965	2.4165	2.62657	2.02186	1.70618	1.00803	2.52154	2.36737	2.00094	1.40553	1.22705	1.35237	2.5724	2.22542	2.16565	1.45233	1.39346	3.14795	2.46989	1.44193	1.14064	1.01146	1.1565	2.72981	1.34785	1.46016	1.49031	2.12656	2.49543	1.9062	1.95458	1.63414	2.60622	3.22297	1.48989	1.34636	1.56235	2.96546
Cell_0231	AMPKARt2	Glucose 17 mM + Glutamine 2.500000e-01 mM + Insulin 10000 ng/ml	0.648472	0.551324	0.555422	0.62731	0.650209	0.443104	0.609299	0.498455	0.571696	0.462415	0.700053	0.477227	0.681811	0.638177	0.591021	0.649269	0.551769	0.653199	0.498515	0.388508	0.572724	0.520626	0.491948	0.45441	0.510624	0.450567	0.535102	0.584012	0.577394	0.586872	0.566216	0.643956	0.562499	0.731792	0.481619	0.521469	0.6013	0.470493	0.643339	0.557658	0.569174	0.456285	0.480088	0.639488	0.479183	0.596868	0.619962
Cell_0232	TFEB_TR	Glucose 17 mM + Glutamine 2.500000e-01 mM + Insulin 10000 ng/ml	1.64235	3.07131	1.00591	1.88722	1.28672	2.35557	1.4349	1.58223	1.35688	1.63807	1.07711	3.72648	0.807143	1.16584	1.60101	1.96674	1.01484	1.23761	1.11904	1.81634	2.39035	1.87661	1.11331	1.05899	1.4193	0.98907	1.84728	1.96875	1.40576	1.46427	1.06985	1.47605	1.63999	0.568489	1.23965	1.84653	1.23384	2.50515	1.25321	3.80256	1.23041	0.905105	2.57728	0.821865	0.896442	1.35387	1.49858
Cell_0232	FOXO_TR	Glucose 17 mM + Glutamine 2.500000e-01 mM + Insulin 10000 ng/ml	2.94809	3.19145	1.61567	1.72583	1.66588	2.52616	3.06825	1.57618	1.36853	1.12037	2.28184	2.66332	2.09547	1.75251	1.0121	3.01499	2.49445	1.97751	1.44178	1.18925	1.88707	2.68185	2.19027	2.23298	1.39884	1.35111	3.16454	2.51734	1.43416	1.09716	1.00787	1.2153	2.79474	1.36419	1.42984	1.47737	2.13432	2.46711	1.8935	1.90036	1.53828	2.53254	3.20173	1.4822	1.28675	1.56563	3.4961
Cell_0232	AMPKARt2	Glucose 17 mM + Glutamine 2.500000e-01 mM + Insulin 10000 ng/ml	0.640368	0.548958	0.570067	0.641209	0.654567	0.446447	0.621487	0.488397	0.54884	0.448202	0.720742	0.485842	0.673866	0.623934	0.588182	0.604565	0.542585	0.662745	0.458771	0.390566	0.607026	0.526102	0.473878	0.456444	0.523455	0.45416	0.517586	0.584509	0.584286	0.59006	0.553744	0.641412	0.565802	0.740258	0.49156	0.538971	0.58871	0.473887	0.640503	0.553396	0.584772	0.475117	0.462706	0.645749	0.45836	0.584576	0.603446
Cell_0233	TFEB_TR	Glucose 17 mM + Glutamine 2.500000e-01 mM + Insulin 10000 ng/ml	1.89095	3.09235	1.06574	1.8406	1.22199	2.42348	1.32061	1.65982	1.35875	1.59576	0.911749	2.237	0.820905	1.40611	1.6566	2.01655	1.11409	1.38108	1.12548	1.75655	2.8774	2.14446	1.38171	1.05862	1.30382	1.02376	1.97324	1.74177	1.43037	1.67941	1.09859	1.58148	1.63155	0.581302	1.3	1.99503	1.45151	2.31374	1.11221	4.23781	1.33512	0.976184	2.38189	0.865464	0.833522	1.21461	1.37726
Cell_0233	FOXO_TR	Glucose 17 mM + Glutamine 2.500000e-01 mM + Insulin 10000 ng/ml	2.97281	3.13677	1.69529	1.62072	1.65395	2.57719	2.92929	1.58146	1.30122	1.09303	2.24409	2.59841	2.19899	1.68758	1.07523	2.95569	2.47522	1.97967	1.43777	1.16563	2.56322	2.75225	1.66359	2.29463	1.34585	1.44505	3.0926	2.29651	1.47911	1.04346	1.0092	1.29642	2.85201	1.42544	1.38236	1.42611	2.28684	2.24393	1.94429	1.83854	1.50147	2.73753	3.30234	1.47161	1.30227	1.60294	3.55225
Cell_0233	AMPKARt2	Glucose 17 mM + Glutamine 2.500000e-01 mM + Insulin 10000 ng/ml	0.617295	0.540888	0.560201	0.653984	0.658877	0.444696	0.631006	0.490034	0.553175	0.447766	0.69203	0.516126	0.666274	0.620474	0.607277	0.603006	0.552123	0.661993	0.416047	0.386519	0.582979	0.530437	0.569739	0.443189	0.508206	0.461323	0.523164	0.588751	0.581553	0.596437	0.551102	0.633151	0.572194	0.746577	0.502661	0.545023	0.575597	0.483046	0.656462	0.530081	0.575562	0.491176	0.45942	0.64464	0.435424	0.59821	0.603085
Cell_0234	TFEB_TR	Glucose 17 mM + Glutamine 2.500000e-01 mM + Insulin 10000 ng/ml	2.02119	3.25534	1.08107	1.90562	1.06425	2.56981	1.54504	1.59457	1.11162	1.54218	0.989862	1.44189	0.845022	1.54471	1.25342	2.00091	1.26512	1.41677	1.16135	1.77186	2.76504	2.2241	1.13813	1.05671	1.29885	1.19176	2.68874	1.65972	1.44482	1.58482	1.15543	1.48672	1.5509	0.593355	1.35746	1.89864	1.40787	1.86103	1.52227	4.07631	1.23516	1.13631	2.36395	0.880643	0.973962	1.17407	1.33836
Cell_0234	FOXO_TR	Glucose 17 mM + Glutamine 2.500000e-01 mM + Insulin 10000 ng/ml	3.03763	3.08332	1.68602	1.5956	1.65529	2.72549	2.87369	1.58588	1.25328	1.10842	2.20387	2.47325	2.26167	1.55035	1.07632	2.81107	2.3734	2.07157	1.39651	1.17111	2.6444	2.67849	1.62458	2.30121	1.37165	1.7386	2.97647	2.23887	1.4705	1.06539	0.990241	1.31397	2.854	1.4739	1.34055	1.39215	2.53124	2.1362	2.08583	1.80431	1.50452	2.95131	3.24791	1.49965	1.27073	1.63934	3.55911
Cell_0234	AMPKARt2	Glucose 17 mM + Glutamine 2.500000e-01 mM + Insulin 10000 ng/ml	0.59489	0.54059	0.546984	0.668622	0.661233	0.457805	0.618889	0.509563	0.579379	0.469726	0.67646	0.539137	0.664454	0.621016	0.621341	0.620047	0.55812	0.663344	0.391728	0.374574	0.54288	0.532589	0.569954	0.41174	0.501406	0.499457	0.516578	0.596415	0.58917	0.600481	0.550198	0.630416	0.575029	0.7479	0.515891	0.558255	0.588841	0.481859	0.676566	0.49845	0.564095	0.50118	0.473975	0.650185	0.442417	0.584283	0.606868
Cell_0235	TFEB_TR	Glucose 17 mM + Glutamine 2.500000e-01 mM + Insulin 10000 ng/ml	2.02238	3.13811	1.07025	2.01874	1.00414	2.52114	1.57184	1.43462	1.15102	1.47772	0.911127	2.06146	0.850091	1.57758	1.16366	2.11535	1.45318	1.25949	1.23628	1.80301	2.56829	2.19418	0.982022	1.17043	1.38463	1.59476	2.91152	0.6612	1.41688	1.62178	1.21555	1.62049	1.6057	0.587039	1.40764	1.73265	1.27751	1.94815	1.60141	3.58058	1.11459	1.02696	2.20753	0.861516	1.16644	1.32291	1.79075
Cell_0235	FOXO_TR	Glucose 17 mM + Glutamine 2.500000e-01 mM + Insulin 10000 ng/ml	3.04521	3.18051	1.6286	1.63668	1.62415	2.69915	2.92925	1.55482	1.21908	1.11153	2.17995	2.44632	2.20121	1.46466	1.01886	2.82638	2.32966	2.1081	1.37577	1.20922	2.53928	2.64885	1.63099	2.29112	1.42009	1.93135	2.91496	1.43406	1.40553	1.1001	0.979491	1.33259	2.84647	1.43115	1.33611	1.38929	2.63363	2.17287	2.21623	1.81065	1.5028	2.94934	3.12855	1.51341	1.24402	1.55321	3.57365
Cell_0235	AMPKARt2	Glucose 17 mM + Glutamine 2.500000e-01 mM + Insulin 10000 ng/ml	0.59312	0.549875	0.554024	0.67932	0.676691	0.463088	0.605514	0.522567	0.593921	0.488773	0.687184	0.532445	0.670802	0.631001	0.620318	0.613397	0.548354	0.667235	0.391364	0.397252	0.562134	0.531644	0.578747	0.377048	0.511809	0.554982	0.497952	0.617857	0.603139	0.601704	0.546174	0.630132	0.575084	0.745687	0.537554	0.557804	0.612021	0.481518	0.671967	0.498962	0.571996	0.523022	0.47692	0.650856	0.444688	0.569189	0.610221
Cell_0236	TFEB_TR	Glucose 17 mM + Glutamine 2.500000e-01 mM + Insulin 10000 ng/ml	1.95504	3.11815	1.10323	1.92015	1.0535	2.31324	1.32963	1.41621	1.38209	1.39354	0.806327	1.95684	0.83427	1.61614	1.49041	2.07785	1.40804	1.36486	1.32743	1.72595	2.45334	2.23168	1.02514	1.34942	1.4284	1.65138	2.2517	0.673228	1.39231	1.63052	1.23811	2.02792	1.67519	0.574664	1.41178	1.79478	1.32091	2.07857	1.25	3.48817	1.05024	0.823095	2.18574	0.880599	1.21259	1.33022	2.14713
Cell_0236	FOXO_TR	Glucose 17 mM + Glutamine 2.500000e-01 mM + Insulin 10000 ng/ml	2.98691	3.26116	1.59595	1.58727	1.47435	2.50476	2.90175	1.5517	1.17457	1.09119	2.1885	2.43658	2.10506	1.39661	0.996533	2.87454	2.3432	2.0742	1.37315	1.20405	2.64299	2.80229	1.63098	2.27674	1.45362	1.95019	2.83586	1.4282	1.4139	1.10545	1.21305	1.38208	2.9251	1.39693	1.33981	1.29782	2.62466	2.12754	2.2647	1.79253	1.5176	2.80942	3.10828	1.47453	1.33765	1.38179	3.48384
Cell_0236	AMPKARt2	Glucose 17 mM + Glutamine 2.500000e-01 mM + Insulin 10000 ng/ml	0.605228	0.548685	0.562544	0.676612	0.680864	0.44961	0.603525	0.526522	0.58207	0.50629	0.683629	0.530384	0.672636	0.649325	0.613542	0.608754	0.559182	0.663122	0.39423	0.443731	0.586919	0.519623	0.586113	0.358571	0.520519	0.568552	0.508177	0.608109	0.584663	0.605716	0.565557	0.628566	0.59017	0.726535	0.55067	0.540162	0.615575	0.491733	0.662068	0.518987	0.575518	0.545831	0.461251	0.647844	0.449094	0.595871	0.607363
Cell_0237	TFEB_TR	Glucose 17 mM + Glutamine 2.500000e-01 mM + Insulin 10000 ng/ml	1.93408	0.571151	1.14845	1.77668	1.18095	2.19365	1.51673	1.46862	1.37657	1.27634	0.895712	1.63043	0.87274	1.70887	1.66811	1.89349	1.05999	1.57451	1.41782	1.58981	2.28614	2.12239	1.27511	1.49329	1.45779	1.36851	1.82917	0.611444	1.4791	1.46915	1.18582	2.08646	1.02127	0.582165	1.40086	1.9667	1.49452	1.8088	1.14017	3.92951	1.05648	0.94353	2.36394	0.940107	1.36078	1.39719	2.10539
Cell_0237	FOXO_TR	Glucose 17 mM + Glutamine 2.500000e-01 mM + Insulin 10000 ng/ml	2.88745	1.31216	1.69732	1.49286	1.40214	2.4497	2.90048	1.55764	1.16891	1.10561	2.22514	2.3967	2.08249	1.35611	0.963383	2.88833	2.298	2.14876	1.32551	1.14565	2.60157	3.02136	1.57706	2.21294	1.52704	1.9698	2.7476	1.37795	1.45028	1.12792	1.68257	1.44837	2.47536	1.52531	1.33321	1.29591	2.59798	2.25225	2.24855	1.75983	1.53655	2.72133	3.1205	1.45476	1.42279	1.2751	3.46455
Cell_0237	AMPKARt2	Glucose 17 mM + Glutamine 2.500000e-01 mM + Insulin 10000 ng/ml	0.610549	0.696607	0.546927	0.675008	0.667357	0.451587	0.598834	0.53726	0.563513	0.526206	0.674323	0.548051	0.667515	0.649849	0.617204	0.618627	0.593502	0.658455	0.385021	0.461712	0.57452	0.506601	0.584463	0.359133	0.528328	0.543845	0.526969	0.621752	0.544267	0.613469	0.578956	0.630597	0.606306	0.682968	0.557204	0.542454	0.599616	0.499752	0.669393	0.525398	0.570155	0.541297	0.461836	0.654282	0.463012	0.614663	0.592027
Cell_0238	TFEB_TR	Glucose 17 mM + Glutamine 2.500000e-01 mM + Insulin 10000 ng/ml	1.89986	0.577167	1.16616	1.76139	1.41965	2.29628	1.83987	1.28108	1.23056	1.20084	0.944705	1.859	0.904695	1.75559	1.69933	1.92035	1.04765	1.51207	1.52161	1.51809	2.26331	2.05218	1.33686	1.57973	1.44714	1.40421	2.01102	0.502775	1.62304	1.56862	1.15759	1.9395	1.03423	0.612519	1.42598	1.92102	1.56492	1.80721	1.29003	3.89658	1.2688	1.0549	2.02742	0.971131	1.6264	1.52881	2.63085
Cell_0238	FOXO_TR	Glucose 17 mM + Glutamine 2.500000e-01 mM + Insulin 10000 ng/ml	2.71527	1.29081	1.86431	1.52795	1.72219	2.5305	3.04563	1.54188	1.24353	1.06194	2.28075	2.41495	2.06042	1.40063	0.941302	2.86059	2.18879	2.22316	1.25741	1.12808	2.56544	3.07638	1.55797	2.09764	1.57301	1.96561	2.77006	1.32012	1.42773	1.1616	2.00297	1.62403	2.47041	1.70009	1.35672	1.69743	2.51712	2.56025	2.20589	1.7491	1.47498	2.71653	3.09281	1.46205	1.37466	1.24324	3.55975
Cell_0238	AMPKARt2	Glucose 17 mM + Glutamine 2.500000e-01 mM + Insulin 10000 ng/ml	0.606642	0.701079	0.506029	0.68052	0.661444	0.465947	0.603043	0.547097	0.568619	0.528398	0.677312	0.54084	0.668601	0.635501	0.627004	0.606543	0.620191	0.663325	0.379466	0.454308	0.571765	0.515835	0.58195	0.366204	0.542785	0.541722	0.517126	0.630945	0.532661	0.617355	0.562151	0.623331	0.63025	0.633446	0.577306	0.533685	0.580963	0.509113	0.667142	0.529591	0.575898	0.522002	0.47545	0.65527	0.459757	0.602349	0.588121
Cell_0239	TFEB_TR	Glucose 17 mM + Glutamine 2.500000e-01 mM + Insulin 10000 ng/ml	1.82189	0.578202	1.21986	1.67724	1.53867	2.41295	1.06648	1.10657	1.21755	1.1773	1.11681	1.81425	0.862362	1.72982	1.63225	1.96079	1.34234	1.55392	1.60383	1.47688	2.27397	2.14067	1.08548	1.58563	1.35537	1.45777	2.15751	0.471577	1.68806	1.66097	1.24985	2.15078	1.13041	0.672299	1.37968	1.67341	1.42613	1.04758	1.32877	3.21573	1.41933	0.937633	1.62063	0.96965	1.51658	1.33551	3.09266
Cell_0239	FOXO_TR	Glucose 17 mM + Glutamine 2.500000e-01 mM + Insulin 10000 ng/ml	2.66645	1.28172	1.86849	1.56303	2.23076	2.58218	1.17242	1.5726	1.28904	1.00724	2.29721	2.44113	2.01809	1.46091	1.00483	2.84561	2.15961	2.17728	1.24039	1.12533	2.86563	2.85884	1.65335	2.03745	1.53758	1.9504	2.82408	1.33228	1.40303	1.20144	2.05014	1.80724	2.46395	1.70994	1.40157	2.21352	2.37898	1.48934	2.15751	1.73221	1.42178	2.68078	3.03648	1.42747	1.32112	1.26248	3.50195
Cell_0239	AMPKARt2	Glucose 17 mM + Glutamine 2.500000e-01 mM + Insulin 10000 ng/ml	0.609336	0.707168	0.4744	0.677158	0.62787	0.462696	0.563589	0.536628	0.588455	0.52729	0.675269	0.509505	0.67202	0.634323	0.620988	0.570701	0.632652	0.672846	0.379447	0.45518	0.574223	0.543006	0.587502	0.368391	0.547837	0.563471	0.50336	0.634668	0.546698	0.616449	0.557244	0.598262	0.624387	0.595837	0.591824	0.467839	0.578634	0.565718	0.645117	0.541953	0.592412	0.513191	0.472373	0.648834	0.457188	0.599058	0.598054
Cell_0240	TFEB_TR	Glucose 17 mM + Glutamine 2.500000e-01 mM + Insulin 10000 ng/ml	1.95192	0.580532	1.3333	1.58383	1.43954	2.40585	1.06152	1.44255	1.20931	1.18505	1.38364	1.90571	0.885152	1.7159	1.43275	1.84362	1.28769	1.6471	1.61025	1.4289	2.20069	2.12459	1.09199	1.54825	1.31313	1.16266	2.22499	0.54352	1.7398	1.35796	1.26338	2.36088	1.06766	0.78576	1.18668	1.59725	1.28109	1.08357	1.23558	3.22675	1.15686	0.976884	2.19032	0.971606	1.23312	1.04333	2.20274
Cell_0240	FOXO_TR	Glucose 17 mM + Glutamine 2.500000e-01 mM + Insulin 10000 ng/ml	2.92806	1.29339	1.68537	1.45497	2.41658	2.67456	1.1734	1.60135	1.21505	1.41527	2.27536	2.49763	2.06097	1.44734	0.987302	2.88028	2.20148	2.13401	1.23505	1.09673	3.11564	2.73803	1.76942	2.09456	1.54951	2.04023	2.77672	1.36406	1.3878	1.25749	2.05954	1.72403	2.46638	1.60416	1.40801	2.43652	2.2751	1.49093	2.12154	1.72567	1.73192	2.55328	3.00938	1.38449	1.35359	1.28234	3.30872
Cell_0240	AMPKARt2	Glucose 17 mM + Glutamine 2.500000e-01 mM + Insulin 10000 ng/ml	0.616191	0.712061	0.473699	0.67397	0.551002	0.453079	0.562444	0.518283	0.583581	0.548216	0.671974	0.514543	0.65986	0.634883	0.61548	0.553709	0.637188	0.676316	0.372293	0.467096	0.548119	0.550856	0.593361	0.366259	0.531376	0.561073	0.50526	0.635058	0.55328	0.620613	0.560872	0.588976	0.622598	0.576822	0.590488	0.390597	0.586131	0.573654	0.632088	0.544131	0.609422	0.507901	0.469614	0.653451	0.480372	0.611051	0.587326
Cell_0241	TFEB_TR	Glucose 17 mM + Glutamine 2.500000e-01 mM + Insulin 10000 ng/ml	2.15283	0.591177	1.41337	1.66716	1.40611	2.44068	1.04237	1.75659	0.993334	1.287	1.20491	1.36962	0.995754	1.70863	1.48857	1.86201	1.0591	1.34558	1.61213	1.41037	2.65995	2.17189	1.36828	1.58231	1.38693	1.02845	2.23752	0.62221	1.85864	1.24305	1.18296	2.25587	1.00297	0.946656	1.02672	1.67928	1.26308	1.10281	1.1311	3.7472	0.824282	1.08112	1.52839	0.942154	1.44232	1.04855	1.49491
Cell_0241	FOXO_TR	Glucose 17 mM + Glutamine 2.500000e-01 mM + Insulin 10000 ng/ml	3.04441	1.28433	1.47259	1.39751	2.25717	2.80075	1.16341	1.55724	1.13176	2.2168	2.24179	1.10623	2.13529	1.40025	0.971542	2.87414	2.22971	2.12453	1.2105	1.11464	3.08756	3.04699	1.76932	2.11502	1.63729	2.10938	2.69427	1.33245	1.33572	1.29652	2.11536	1.50223	2.42582	1.514	1.39431	2.5491	2.25514	1.46787	2.10954	1.72675	2.3735	2.42715	1.25436	1.3915	1.36702	1.2596	3.26675
Cell_0241	AMPKARt2	Glucose 17 mM + Glutamine 2.500000e-01 mM + Insulin 10000 ng/ml	0.608828	0.713005	0.468554	0.679886	0.52284	0.458413	0.575377	0.517703	0.563587	0.554128	0.68266	0.472063	0.63208	0.630311	0.626374	0.557937	0.636729	0.668261	0.372948	0.476019	0.525891	0.524266	0.586077	0.369347	0.521442	0.536202	0.497174	0.616417	0.555718	0.625839	0.540231	0.61445	0.628696	0.575737	0.599836	0.367699	0.576429	0.570216	0.626604	0.535494	0.618294	0.504336	0.534907	0.653259	0.506157	0.62154	0.563188
Cell_0242	TFEB_TR	Glucose 17 mM + Glutamine 2.500000e-01 mM + Insulin 10000 ng/ml	2.02473	0.595602	1.37603	1.69206	1.43833	2.47678	1.01619	1.55462	0.936881	1.38674	0.847154	1.3879	1.00949	1.70915	1.8099	2.03208	1.01215	1.22905	1.67948	1.37884	3.19085	2.41817	1.33797	1.70065	1.46419	1.08747	2.0834	0.654552	1.93949	1.44285	1.30581	2.18536	1.30625	1.1171	1.01952	1.72903	1.25674	1.11525	1.03245	3.59762	0.902861	0.996237	1.25224	0.863423	1.81865	1.17553	2.15646
Cell_0242	FOXO_TR	Glucose 17 mM + Glutamine 2.500000e-01 mM + Insulin 10000 ng/ml	2.73161	1.25622	1.29554	1.47506	2.15006	2.82891	1.14004	1.53888	1.13918	2.57172	2.17739	1.12631	2.1416	1.41272	1.36984	2.84347	2.34418	2.17527	1.23397	1.10417	3.05978	3.31077	1.68264	2.01452	1.68454	2.08675	2.65379	1.32513	1.28803	1.28993	2.13391	1.446	2.38922	1.41691	1.41048	2.66554	2.24129	1.47095	2.06651	1.68612	2.79799	2.42978	1.22817	1.40162	1.31977	1.48608	3.31799
Cell_0242	AMPKARt2	Glucose 17 mM + Glutamine 2.500000e-01 mM + Insulin 10000 ng/ml	0.600775	0.708747	0.443176	0.679363	0.572552	0.467945	0.569384	0.528056	0.567628	0.517886	0.687197	0.483085	0.598136	0.649914	0.626075	0.547507	0.641173	0.65649	0.384447	0.481117	0.532345	0.499438	0.578619	0.378738	0.53131	0.524644	0.483079	0.613712	0.558308	0.624572	0.528387	0.635593	0.62871	0.575722	0.606426	0.385781	0.565295	0.563465	0.609467	0.533348	0.605118	0.505596	0.549843	0.631164	0.522265	0.624459	0.563785
Cell_0243	TFEB_TR	Glucose 17 mM + Glutamine 2.500000e-01 mM + Insulin 10000 ng/ml	1.81578	0.590027	1.27696	1.47173	1.39042	2.42924	1.00687	1.45709	1.35896	1.34751	0.898839	1.46073	0.983632	1.75217	1.82427	2.16594	0.985849	1.63354	1.73372	1.32541	2.69778	2.55384	1.23342	1.77014	1.46056	1.03776	2.02733	0.627429	1.93568	1.57013	1.48496	2.07642	1.58014	1.28225	1.02132	1.92499	1.26363	1.13153	1.02222	3.45806	1.17774	1.01313	1.24856	0.822665	1.81446	1.31081	2.61254
Cell_0243	FOXO_TR	Glucose 17 mM + Glutamine 2.500000e-01 mM + Insulin 10000 ng/ml	2.56552	1.26458	1.17355	1.50545	2.24361	2.83158	1.1146	1.5652	1.17224	2.4366	2.13241	1.14911	2.10117	1.47111	1.9894	2.85171	1.18084	2.2993	1.27639	1.07467	3.09759	3.0884	1.70334	1.93909	1.63817	2.12175	2.63355	1.37375	1.27565	1.20289	2.1295	1.44655	2.37236	1.3089	1.4317	2.62522	2.17601	1.49505	1.9767	1.65097	2.89806	2.48633	1.2359	1.37086	1.32024	2.1503	3.25215
Cell_0243	AMPKARt2	Glucose 17 mM + Glutamine 2.500000e-01 mM + Insulin 10000 ng/ml	0.611475	0.703178	0.440019	0.681179	0.607757	0.469466	0.558881	0.530625	0.580765	0.48458	0.67012	0.481496	0.553366	0.6799	0.616292	0.527282	0.678632	0.646906	0.382502	0.496657	0.539779	0.505183	0.589851	0.378698	0.529311	0.522666	0.499409	0.643234	0.546235	0.63094	0.5391	0.629606	0.642174	0.567975	0.591305	0.392361	0.578634	0.558039	0.595746	0.540863	0.578103	0.494081	0.559635	0.614241	0.539451	0.607209	0.580466
Cell_0244	TFEB_TR	Glucose 17 mM + Glutamine 2.500000e-01 mM + Insulin 10000 ng/ml	1.86811	0.593896	1.25539	1.30868	1.39421	2.47314	1.01362	1.64085	1.55908	1.32744	1.10351	1.55484	1.10341	1.73877	1.44006	2.16946	0.800557	1.78032	1.71979	1.3682	2.2084	2.61805	1.40495	1.70899	1.40227	1.05489	1.87932	0.562259	1.93827	1.8267	1.44363	1.83736	1.38328	1.44353	0.984507	2.09292	1.31606	1.16287	1.11862	3.71258	1.12225	1.08305	1.34345	0.88357	1.71674	1.64552	2.35479
Cell_0244	FOXO_TR	Glucose 17 mM + Glutamine 2.500000e-01 mM + Insulin 10000 ng/ml	2.71366	1.28639	1.13861	1.44678	2.34523	2.89752	1.11233	1.52697	1.16323	2.51444	2.16029	1.15586	1.98121	1.5093	2.31181	2.81448	1.19509	2.30939	1.24484	1.39873	3.09234	2.81103	1.86992	1.87433	1.51449	2.15854	2.64009	1.35275	1.26057	1.14209	2.15418	1.34458	2.33066	1.26134	1.40689	2.60616	2.13696	1.4811	1.94922	1.64659	2.96908	2.44666	1.24837	1.32738	1.39906	2.77634	3.11465
Cell_0244	AMPKARt2	Glucose 17 mM + Glutamine 2.500000e-01 mM + Insulin 10000 ng/ml	0.619236	0.702742	0.459164	0.693795	0.598707	0.472713	0.568645	0.521124	0.579044	0.481718	0.654542	0.477461	0.504389	0.683637	0.618806	0.52306	0.67321	0.625687	0.375453	0.519423	0.533984	0.522497	0.600259	0.365269	0.522286	0.509044	0.526826	0.653431	0.532925	0.640457	0.535075	0.628015	0.655677	0.563773	0.593458	0.386945	0.591025	0.553462	0.595982	0.551971	0.575093	0.47439	0.567079	0.618923	0.54344	0.566647	0.576293
Cell_0245	TFEB_TR	Glucose 17 mM + Glutamine 2.500000e-01 mM + Insulin 10000 ng/ml	1.90629	0.604039	1.29716	1.45092	1.43225	2.54953	1.01367	1.55069	1.13666	1.41478	1.14508	1.61121	1.25122	1.64162	1.45526	1.98746	0.941184	1.52539	1.70618	1.53437	2.65444	1.26598	1.40748	1.66455	1.39407	1.25327	1.75222	0.540154	1.98219	2.04529	1.39161	1.85842	1.17655	1.59224	1.01622	1.91557	1.28104	1.22971	1.27825	3.44317	0.801041	0.922868	1.35595	0.980208	1.6216	1.92638	2.26697
Cell_0245	FOXO_TR	Glucose 17 mM + Glutamine 2.500000e-01 mM + Insulin 10000 ng/ml	2.67145	1.29342	1.12978	1.36929	2.34646	2.91385	1.1238	1.46449	1.14414	2.69655	2.1936	1.15496	1.8117	1.51827	2.38745	2.76716	1.20784	2.23776	1.18995	2.04929	3.02821	1.48655	1.94159	1.72966	1.53212	2.09675	2.67845	1.31432	1.23923	1.28329	2.18302	1.26652	2.43599	1.27109	1.34197	2.74817	2.1387	1.4703	1.9769	1.63819	2.95612	2.388	1.25471	1.29693	1.44479	2.93342	3.00051
Cell_0245	AMPKARt2	Glucose 17 mM + Glutamine 2.500000e-01 mM + Insulin 10000 ng/ml	0.618303	0.705233	0.456344	0.695666	0.591261	0.473075	0.561108	0.506841	0.580886	0.484755	0.659292	0.485365	0.478923	0.67937	0.619201	0.522962	0.683343	0.596128	0.385038	0.513222	0.528791	0.557351	0.586761	0.358795	0.541016	0.496042	0.521391	0.640975	0.538156	0.628438	0.525317	0.640209	0.649513	0.561805	0.62225	0.395259	0.587222	0.559364	0.601548	0.559467	0.600767	0.473597	0.571529	0.619874	0.524949	0.516931	0.556485
Cell_0246	TFEB_TR	Glucose 17 mM + Glutamine 2.500000e-01 mM + Insulin 10000 ng/ml	1.74539	0.602744	1.27895	1.58794	1.38992	2.53016	1.02259	1.32747	0.897341	1.44353	1.18075	1.61746	1.32413	1.58415	2.18061	1.86047	1.02827	1.49991	1.7453	1.71082	3.02147	1.32123	1.16829	1.75896	1.50889	1.52764	2.42915	0.530128	2.01618	1.78876	1.40322	1.9818	1.25743	1.72571	1.03464	1.95456	1.24166	1.31946	1.52969	3.17676	0.733343	0.895862	1.4203	1.05636	1.36638	1.68353	2.11776
Cell_0246	FOXO_TR	Glucose 17 mM + Glutamine 2.500000e-01 mM + Insulin 10000 ng/ml	2.4619	1.31066	1.08258	1.30854	2.36019	2.79081	1.12711	1.47211	1.13166	2.62072	2.18348	1.18058	1.72737	1.49034	2.37396	2.81047	1.18503	2.2884	1.1817	2.42485	2.93805	1.5047	1.85035	1.65809	1.94423	2.07559	2.7117	1.36312	1.22787	1.39649	2.18133	1.26525	2.61867	1.28343	1.32578	2.79101	2.07361	1.5165	1.93586	1.64783	2.91793	2.41144	1.27454	1.28692	1.39209	2.80309	2.95717
Cell_0246	AMPKARt2	Glucose 17 mM + Glutamine 2.500000e-01 mM + Insulin 10000 ng/ml	0.634128	0.707687	0.441287	0.691475	0.589397	0.453003	0.537724	0.509547	0.584083	0.481936	0.66649	0.490655	0.483937	0.685081	0.62251	0.515867	0.698615	0.588583	0.399302	0.462533	0.526835	0.562344	0.560944	0.363891	0.537253	0.508611	0.506715	0.642853	0.543911	0.619719	0.529629	0.635094	0.651613	0.556659	0.631169	0.400924	0.586194	0.578292	0.618316	0.560549	0.606357	0.483587	0.571739	0.609052	0.518958	0.469626	0.55751
Cell_0247	TFEB_TR	Glucose 17 mM + Glutamine 2.500000e-01 mM + Insulin 10000 ng/ml	1.60988	0.60048	1.25072	1.49379	1.41244	2.51876	1.05889	1.40696	1.05516	1.43097	1.25547	1.64999	1.43639	1.5301	2.35598	1.94579	0.961354	1.77132	1.78159	1.82242	3.24369	1.2531	1.13165	1.80538	1.62509	1.39698	0.642189	0.469382	1.99977	1.53382	1.35934	1.89441	1.23068	1.82161	0.950462	2.4574	1.36115	1.33704	1.57987	3.53046	0.889334	1.12326	1.47003	1.1835	1.41161	1.34497	1.9113
Cell_0247	FOXO_TR	Glucose 17 mM + Glutamine 2.500000e-01 mM + Insulin 10000 ng/ml	2.37734	1.31999	1.05608	1.35026	2.41792	2.58132	1.14984	1.48803	1.09328	2.6159	2.16333	1.22044	1.65776	1.47773	2.25067	2.8311	1.15561	2.31157	1.17688	2.40318	2.98008	1.50803	1.80462	1.67256	2.45568	2.12963	1.49279	1.33875	1.2164	1.34824	2.15908	1.26972	2.54209	1.25579	1.36231	2.69981	1.97524	1.57141	1.86168	1.64016	3.14754	2.44421	1.28383	1.32395	1.30678	2.69753	2.98479
Cell_0247	AMPKARt2	Glucose 17 mM + Glutamine 2.500000e-01 mM + Insulin 10000 ng/ml	0.653251	0.710915	0.438071	0.692998	0.583351	0.441049	0.541971	0.533228	0.572197	0.481652	0.659758	0.472398	0.501283	0.683035	0.645046	0.517548	0.697245	0.59591	0.405839	0.404176	0.51683	0.566673	0.540784	0.367642	0.462308	0.535778	0.415579	0.63521	0.541521	0.642047	0.524838	0.621234	0.664983	0.553803	0.61725	0.396476	0.592884	0.585447	0.632309	0.566724	0.578307	0.481312	0.567994	0.610179	0.537388	0.437893	0.576049
Cell_0248	TFEB_TR	Glucose 17 mM + Glutamine 2.500000e-01 mM + Insulin 10000 ng/ml	1.54414	0.622898	1.2981	1.53515	1.52047	2.44349	1.07905	1.51696	1.10505	1.46381	1.18278	1.74577	1.5033	1.4236	1.55355	1.99594	0.970231	1.8312	1.73527	1.874	3.68494	1.23356	1.21999	1.68949	1.6366	0.874071	0.650244	0.470915	1.92353	1.59756	1.39745	1.96043	1.07694	1.84345	0.929952	2.56465	1.38715	1.26664	1.19271	3.42328	0.932472	1.14202	1.39576	1.31421	1.7986	1.59554	2.16086
Cell_0248	FOXO_TR	Glucose 17 mM + Glutamine 2.500000e-01 mM + Insulin 10000 ng/ml	2.35235	1.36091	1.09727	1.42806	2.35574	2.4255	1.18062	1.45593	1.08605	2.73556	2.1567	1.22928	1.49648	1.54747	2.20543	2.78864	1.16534	2.18148	1.16	2.36295	3.18748	1.51401	1.84425	1.59293	2.60147	2.15336	1.47757	1.177	1.20783	1.59724	2.12926	1.27313	2.44539	1.18373	1.31593	2.71913	1.95179	1.64518	1.81522	1.6377	3.38181	2.47649	1.26726	1.38369	1.26833	2.73927	2.9479
Cell_0248	AMPKARt2	Glucose 17 mM + Glutamine 2.500000e-01 mM + Insulin 10000 ng/ml	0.653239	0.704479	0.433854	0.686651	0.582396	0.462661	0.553001	0.550759	0.566523	0.485851	0.65732	0.454744	0.51638	0.680019	0.65209	0.526064	0.685234	0.586059	0.405216	0.37925	0.500899	0.570288	0.536539	0.375246	0.381807	0.536485	0.435723	0.591788	0.547001	0.651248	0.511045	0.633998	0.665937	0.54866	0.621095	0.410146	0.602386	0.566191	0.620311	0.577883	0.566585	0.47586	0.562556	0.621226	0.543729	0.434977	0.577191
Cell_0249	TFEB_TR	Glucose 17 mM + Glutamine 2.500000e-01 mM + Insulin 10000 ng/ml	0.469016	0.660957	1.33819	1.69726	1.50453	2.33139	1.07478	1.3403	1.26635	1.43289	0.92925	1.78297	1.43419	1.39527	1.2699	1.93762	0.909037	1.51374	1.64932	1.90273	3.5809	1.30273	1.19917	1.59608	1.70237	1.23947	0.651823	0.615681	1.83207	1.50303	1.43069	1.46894	1.13636	1.83707	0.986605	2.1394	1.2307	1.29431	0.883486	2.70313	1.03007	1.03716	1.53893	1.2661	1.74694	1.99235	2.24541
Cell_0249	FOXO_TR	Glucose 17 mM + Glutamine 2.500000e-01 mM + Insulin 10000 ng/ml	1.23683	1.5046	1.14451	1.40816	2.17716	2.47803	1.17065	1.42481	1.12055	2.64152	2.16109	1.20092	1.35499	1.58731	2.28111	2.81074	1.16498	2.09444	1.16944	2.40768	3.25886	1.53467	1.86387	1.50706	2.50264	2.14082	1.44646	1.09602	1.21305	2.09763	2.08971	1.5431	2.64834	1.13687	1.33955	2.83965	1.96719	1.80924	1.7554	1.7159	3.32007	2.53309	1.26199	1.36446	1.26593	2.84427	2.84041
Cell_0249	AMPKARt2	Glucose 17 mM + Glutamine 2.500000e-01 mM + Insulin 10000 ng/ml	0.593465	0.678537	0.435984	0.689137	0.581401	0.477469	0.546859	0.55409	0.575286	0.489246	0.667606	0.465389	0.533576	0.693937	0.630153	0.524266	0.685753	0.570264	0.398907	0.392017	0.496058	0.571221	0.54458	0.392212	0.364097	0.511598	0.436004	0.55388	0.555346	0.62412	0.504643	0.586976	0.65404	0.546452	0.642765	0.430483	0.602252	0.557922	0.609557	0.57107	0.577632	0.480076	0.5619	0.621027	0.540203	0.455436	0.55982
Cell_0250	TFEB_TR	Glucose 17 mM + Glutamine 2.500000e-01 mM + Insulin 10000 ng/ml	0.488948	0.684596	1.34075	1.53935	1.39522	2.41539	1.10225	1.21906	1.56264	1.37322	0.755798	1.71452	1.4422	1.42821	1.55407	1.88746	0.791451	1.45857	1.64198	1.94211	3.47568	1.30782	1.20654	1.61312	1.84527	2.2114	0.659817	0.922161	1.85252	1.35601	1.26392	1.61237	1.34073	1.88682	0.936784	1.95877	1.29092	1.42586	1.06482	2.46856	1.18974	1.09004	1.85559	1.1825	1.37301	1.89855	1.94344
Cell_0250	FOXO_TR	Glucose 17 mM + Glutamine 2.500000e-01 mM + Insulin 10000 ng/ml	1.28346	1.60952	1.14983	1.58128	2.14501	2.65239	1.17123	1.40575	1.05653	2.52045	2.13327	1.15548	1.30064	1.56643	2.23696	2.86961	1.14787	2.06476	1.19357	2.51012	3.11204	1.5744	1.83931	1.54717	2.43284	2.08809	1.42263	1.13605	1.22041	2.27466	2.02446	1.55589	2.79128	1.14411	1.75015	2.90321	2.02954	1.98395	1.74162	1.67548	3.2492	2.5159	1.27413	1.29813	1.27364	2.80514	2.84686
Cell_0250	AMPKARt2	Glucose 17 mM + Glutamine 2.500000e-01 mM + Insulin 10000 ng/ml	0.586475	0.644695	0.449833	0.702506	0.578241	0.476325	0.549329	0.554927	0.583399	0.48458	0.669612	0.4719	0.570349	0.705583	0.624792	0.520224	0.698521	0.569176	0.404765	0.417113	0.50708	0.565947	0.54254	0.409876	0.374315	0.505569	0.437184	0.553728	0.560162	0.607411	0.492038	0.603647	0.631075	0.560721	0.636415	0.429474	0.585924	0.571713	0.615954	0.559772	0.564823	0.486356	0.567982	0.614571	0.552205	0.482204	0.547134
Cell_0251	TFEB_TR	Glucose 17 mM + Glutamine 2.500000e-01 mM + Insulin 10000 ng/ml	0.476535	0.709621	1.35051	1.52829	1.36298	1.36669	1.1433	1.43996	1.41765	1.42109	0.822502	1.65962	1.51517	1.39277	1.37328	1.90591	0.862166	1.80678	1.71309	1.97503	4.07358	1.24604	1.29269	1.67206	1.85227	2.17408	0.675722	1.31434	1.96702	1.70324	1.20628	1.44983	1.43429	1.97396	0.920952	2.01508	0.657399	1.45686	1.40173	2.78611	1.10665	1.07161	1.77839	1.2799	1.41381	1.65304	2.01408
Cell_0251	FOXO_TR	Glucose 17 mM + Glutamine 2.500000e-01 mM + Insulin 10000 ng/ml	1.26774	1.54235	1.1382	2.22252	2.26425	0.991539	1.22741	1.38165	1.08416	2.57507	2.09207	1.10763	1.27075	1.57086	2.12385	2.84472	1.19559	1.94878	1.20069	2.6903	3.05279	1.60254	1.74627	1.59469	2.39854	2.03191	1.44586	1.13788	1.21159	2.2775	1.90717	1.57046	2.64257	1.15212	2.27922	2.93578	2.21686	2.03162	1.82596	1.64412	3.29945	2.43606	1.28572	1.33862	1.31765	2.69158	2.94341
Cell_0251	AMPKARt2	Glucose 17 mM + Glutamine 2.500000e-01 mM + Insulin 10000 ng/ml	0.593621	0.618204	0.445016	0.66808	0.579323	0.480548	0.549084	0.556563	0.589464	0.472491	0.666341	0.456503	0.609548	0.696539	0.637983	0.527898	0.702315	0.570879	0.428072	0.427765	0.514592	0.561913	0.52934	0.424226	0.369561	0.513894	0.441888	0.55617	0.569322	0.614667	0.478765	0.60629	0.608354	0.571159	0.58394	0.43124	0.611572	0.542265	0.612612	0.583725	0.540057	0.493933	0.582742	0.614641	0.561378	0.503	0.551718
Cell_0252	TFEB_TR	Glucose 17 mM + Glutamine 2.500000e-01 mM + Insulin 10000 ng/ml	0.465119	0.77386	1.30582	2.10436	1.34015	1.14015	1.1547	1.59392	1.16304	1.47048	0.965799	1.65548	1.42475	1.38666	1.48089	1.99396	0.95744	1.59065	1.7528	1.97212	3.96858	1.20586	1.3027	1.70927	1.86162	1.81882	0.675878	1.43612	1.9559	2.19343	1.47246	1.43327	1.33624	2.03518	1.09672	1.88157	0.627345	1.50074	1.42655	3.0476	0.984689	0.937782	1.45843	1.31112	1.62156	1.71812	2.20984
Cell_0252	FOXO_TR	Glucose 17 mM + Glutamine 2.500000e-01 mM + Insulin 10000 ng/ml	1.24967	1.4457	1.1327	2.88105	2.25481	1.01816	1.26971	1.36628	1.58831	2.54835	2.21706	1.07934	1.24691	1.4894	2.13856	2.7466	1.26269	1.82179	1.20566	2.80626	3.16748	1.56651	1.60142	1.55338	2.46244	2.06847	1.49698	1.12116	1.19136	2.39846	1.78907	1.58457	2.46367	1.16384	2.45283	3.00514	2.06747	1.95318	1.89008	2.24572	3.36303	2.41146	1.30716	1.43057	1.36612	2.71301	2.96222
Cell_0252	AMPKARt2	Glucose 17 mM + Glutamine 2.500000e-01 mM + Insulin 10000 ng/ml	0.603163	0.59973	0.431698	0.596174	0.575741	0.462303	0.516951	0.561966	0.573665	0.460363	0.67733	0.462858	0.607222	0.68985	0.624393	0.534576	0.692058	0.563774	0.441136	0.417834	0.506204	0.573314	0.526868	0.427526	0.363454	0.506451	0.44196	0.532761	0.575128	0.612546	0.484195	0.614227	0.596272	0.570004	0.535107	0.449274	0.602636	0.470727	0.603134	0.606194	0.540813	0.504661	0.599705	0.62004	0.567053	0.509248	0.571897
Cell_0253	TFEB_TR	Glucose 17 mM + Glutamine 2.500000e-01 mM + Insulin 10000 ng/ml	0.481743	0.885368	1.21766	2.41216	1.26415	1.09084	1.1939	1.33235	1.48605	1.45205	0.76911	1.62658	1.31415	1.5024	2.04381	1.97935	1.0207	1.08047	1.72461	1.97187	3.43462	1.20726	1.26495	1.6465	2.02655	1.83901	0.670193	1.34333	1.86105	2.25931	1.71895	1.5453	1.17686	2.062	1.19325	1.76979	0.594207	1.67135	1.05428	3.15147	0.991273	0.740832	1.37976	1.14756	1.63456	1.86953	2.13177
Cell_0253	FOXO_TR	Glucose 17 mM + Glutamine 2.500000e-01 mM + Insulin 10000 ng/ml	1.30792	1.42228	1.12386	3.06334	2.1582	0.982753	1.27089	1.33839	2.24766	2.40609	1.24805	1.07632	1.23709	1.53811	2.17802	2.69262	1.2553	1.7604	1.23139	2.79449	3.27969	1.51191	1.46377	1.4595	2.58586	2.10942	1.52502	1.15239	1.19413	2.4301	1.76123	1.62772	2.35183	1.17229	2.39511	3.02276	2.04707	1.80319	1.88365	3.1709	3.47208	1.63638	1.32145	1.42273	1.39808	2.69576	2.9185
Cell_0253	AMPKARt2	Glucose 17 mM + Glutamine 2.500000e-01 mM + Insulin 10000 ng/ml	0.603507	0.585072	0.445642	0.567691	0.565071	0.472569	0.480373	0.564967	0.539702	0.454882	0.637764	0.487732	0.58128	0.705798	0.599605	0.533691	0.692259	0.556192	0.437498	0.393549	0.503451	0.593453	0.538196	0.420766	0.366772	0.502807	0.448783	0.52063	0.575625	0.598107	0.486215	0.62008	0.572189	0.583683	0.538757	0.452124	0.60603	0.439736	0.598143	0.573677	0.541077	0.642574	0.595514	0.623725	0.584445	0.50299	0.587461
Cell_0254	TFEB_TR	Glucose 17 mM + Glutamine 2.500000e-01 mM + Insulin 10000 ng/ml	0.491371	1.03204	1.2176	2.17092	1.29348	1.18695	1.30756	1.12369	1.85148	1.47706	1.03731	1.54631	1.33983	1.6883	1.83093	1.97401	1.24615	1.56148	1.71724	2.03909	4.3146	1.21266	1.27134	1.54189	1.98245	1.6007	0.695022	1.52788	1.909	2.16011	1.66414	1.48918	1.15188	2.04393	1.13263	1.90331	0.627126	1.72249	0.875434	3.20427	1.00004	0.785528	1.38826	1.09699	1.68279	1.76426	2.18808
Cell_0254	FOXO_TR	Glucose 17 mM + Glutamine 2.500000e-01 mM + Insulin 10000 ng/ml	1.36569	1.39587	1.11548	2.98146	2.17707	0.963307	1.26238	1.30741	2.42807	2.35712	1.37603	1.07251	1.2126	2.19844	2.15561	2.74932	1.23997	1.69035	1.23077	2.7762	3.28519	1.49953	1.32673	1.409	2.5041	2.09722	1.53427	1.13318	1.22825	2.44984	1.78327	1.67079	2.20662	1.11741	2.39943	2.98134	2.08963	1.62659	1.86691	3.48054	3.49603	1.72277	1.29997	1.37821	1.5545	2.52637	2.87612
Cell_0254	AMPKARt2	Glucose 17 mM + Glutamine 2.500000e-01 mM + Insulin 10000 ng/ml	0.604693	0.575487	0.466496	0.57913	0.559824	0.49564	0.464926	0.559227	0.55482	0.460823	0.603511	0.479381	0.585751	0.710733	0.604883	0.540806	0.702664	0.570562	0.437589	0.364768	0.512964	0.594964	0.552173	0.425087	0.371958	0.514246	0.460199	0.539895	0.584356	0.592848	0.475543	0.613267	0.538971	0.599301	0.568605	0.441318	0.613598	0.435083	0.582375	0.550819	0.521988	0.625914	0.574972	0.622205	0.577369	0.497963	0.589568
Cell_0255	TFEB_TR	Glucose 17 mM + Glutamine 2.500000e-01 mM + Insulin 10000 ng/ml	0.469313	1.1723	1.26858	2.17418	1.41676	1.34762	1.45471	1.4023	1.48556	1.50617	1.13017	1.47151	1.29684	1.94535	1.34888	1.9599	1.30956	2.18188	1.77513	2.15001	4.97933	1.20297	1.17639	1.49963	1.71267	1.69524	0.726288	1.7549	1.97867	2.05548	1.50912	1.54837	1.20665	1.98426	1.17364	1.97741	0.703309	1.68487	1.41074	3.07083	1.22045	0.808965	1.45976	1.2174	1.63516	1.72715	0.651453
Cell_0255	FOXO_TR	Glucose 17 mM + Glutamine 2.500000e-01 mM + Insulin 10000 ng/ml	1.30276	1.36984	1.1376	2.88517	2.18104	1.01151	1.23298	1.31889	2.27117	2.36047	1.44812	1.06287	1.15694	2.9754	2.17348	1.59135	1.26276	1.62251	1.18413	2.75781	3.16585	1.48009	1.24372	1.41845	2.26021	2.18736	1.52194	1.05739	1.23534	2.5856	1.78716	1.66415	2.03562	1.0723	2.45843	3.06261	2.09505	1.50021	1.80341	3.36128	3.43276	1.76183	1.27175	1.36823	1.87481	2.49726	1.4393
Cell_0255	AMPKARt2	Glucose 17 mM + Glutamine 2.500000e-01 mM + Insulin 10000 ng/ml	0.6083	0.575073	0.468889	0.582957	0.56198	0.501123	0.455548	0.561211	0.616153	0.467652	0.605706	0.455765	0.607824	0.668634	0.606416	0.643947	0.675505	0.612175	0.446361	0.34995	0.504687	0.577337	0.557284	0.431021	0.38554	0.519381	0.463018	0.544515	0.596467	0.590604	0.479183	0.611089	0.535321	0.594743	0.577013	0.44011	0.623823	0.406852	0.570263	0.593781	0.522398	0.624768	0.567228	0.629525	0.541973	0.495289	0.725531
Cell_0256	TFEB_TR	Glucose 17 mM + Glutamine 2.500000e-01 mM + Insulin 10000 ng/ml	0.445607	1.2853	1.24446	2.2588	1.34485	1.33412	1.59253	1.60653	1.02775	1.45442	1.10406	1.43679	1.14621	2.19106	1.66058	1.90145	1.01596	1.60688	1.80242	2.1969	3.84956	1.22616	1.02789	1.45093	1.65959	1.65452	0.718788	1.66343	1.93446	1.67208	1.54299	1.78056	1.26662	1.95472	1.20478	1.90541	0.679063	1.76194	1.88756	2.88245	1.47854	0.796863	1.78294	1.32683	1.5074	1.94995	0.614071
Cell_0256	FOXO_TR	Glucose 17 mM + Glutamine 2.500000e-01 mM + Insulin 10000 ng/ml	1.18565	1.39644	1.16581	2.66381	2.09251	1.04164	1.19025	1.30485	2.28798	2.32572	1.42124	1.06352	1.11948	3.05052	2.20787	1.60662	1.26324	1.60449	1.23761	2.68488	3.09558	1.48562	1.26485	1.31383	2.12519	2.28488	1.46396	1.07438	1.20276	2.5862	1.81055	1.66011	1.89306	1.09413	2.50232	3.23313	2.05996	1.46188	1.67535	3.38578	3.52105	1.77767	1.25571	1.35681	2.19093	2.60107	1.40881
Cell_0256	AMPKARt2	Glucose 17 mM + Glutamine 2.500000e-01 mM + Insulin 10000 ng/ml	0.601526	0.578264	0.469617	0.588699	0.566112	0.50002	0.443134	0.572675	0.637748	0.464104	0.623335	0.458165	0.608981	0.613368	0.571461	0.648878	0.61191	0.638967	0.456461	0.351322	0.488087	0.576933	0.550397	0.423996	0.414093	0.515481	0.454987	0.529782	0.600782	0.571203	0.486089	0.609548	0.555127	0.592679	0.566265	0.437255	0.628283	0.395529	0.587619	0.620946	0.551579	0.629725	0.567103	0.653561	0.53101	0.489419	0.723814
Cell_0257	TFEB_TR	Glucose 17 mM + Glutamine 2.500000e-01 mM + Insulin 10000 ng/ml	0.448461	1.41663	1.18226	1.99462	1.08976	1.16316	1.70891	1.27334	1.3678	1.4265	1.07589	1.40421	1.11388	2.29567	2.17876	1.67064	0.93553	0.996036	1.78234	2.15795	1.08852	1.25636	1.11152	1.42858	1.70064	0.995211	0.697121	1.60887	1.95913	1.32036	1.56638	1.84471	1.3859	1.97921	1.05592	2.07083	0.570953	1.8025	1.53729	3.25123	1.21509	0.777913	1.91356	1.35593	1.74867	1.89697	0.659846
Cell_0257	FOXO_TR	Glucose 17 mM + Glutamine 2.500000e-01 mM + Insulin 10000 ng/ml	1.15755	1.44246	1.14065	2.49422	2.06961	1.01419	1.16475	1.2602	2.45171	2.34773	1.36742	1.05661	1.13028	2.80912	2.22094	1.59192	1.2575	1.56695	1.45627	2.62356	1.37611	1.61574	1.26533	1.23611	2.07545	2.18248	1.43745	1.15018	1.21187	2.48003	1.86826	1.68391	1.79718	1.06121	2.50801	3.28038	2.01756	1.47645	1.61565	3.37504	3.56843	1.72864	1.22284	1.36958	2.45485	2.59188	1.45408
Cell_0257	AMPKARt2	Glucose 17 mM + Glutamine 2.500000e-01 mM + Insulin 10000 ng/ml	0.596308	0.57347	0.474349	0.607405	0.568913	0.510091	0.430868	0.570425	0.614617	0.466871	0.635035	0.461065	0.607454	0.592862	0.542365	0.64579	0.570997	0.624557	0.456549	0.346176	0.43678	0.592392	0.546375	0.440577	0.437238	0.506292	0.450973	0.546662	0.598109	0.555851	0.473548	0.605265	0.560985	0.601197	0.55585	0.434242	0.614707	0.401081	0.614874	0.585896	0.55842	0.636609	0.563311	0.6672	0.541459	0.485148	0.718564
Cell_0258	TFEB_TR	Glucose 17 mM + Glutamine 2.500000e-01 mM + Insulin 10000 ng/ml	0.460701	1.54287	1.14487	1.97391	1.02915	1.17795	1.83211	1.05396	1.80195	1.45871	1.05305	1.39363	1.20066	2.32832	2.24723	1.60742	1.17677	1.37227	1.84585	2.1298	0.991955	1.21544	1.25919	1.52371	1.61074	2.10107	0.698199	1.59502	2.06548	1.43865	1.33577	1.75135	1.38589	2.00715	1.01428	2.28056	0.561172	1.80487	1.17196	3.84347	0.812161	0.749852	1.70675	1.25117	1.97717	1.88941	0.674258
Cell_0258	FOXO_TR	Glucose 17 mM + Glutamine 2.500000e-01 mM + Insulin 10000 ng/ml	1.18235	1.47012	1.12352	2.63944	2.0923	0.995692	1.15429	1.28523	2.48093	2.43972	1.3785	1.02494	1.14296	2.81004	2.30786	1.56226	1.26188	1.52135	1.64327	2.59904	1.23426	1.76251	1.20868	1.65257	1.99667	2.08219	1.48733	1.10944	1.23561	2.50985	1.94366	1.69475	1.75697	1.00784	2.50185	3.25394	2.03096	1.49183	1.6697	3.34429	3.4432	1.63509	1.18088	1.38368	2.67243	2.5809	1.48169
Cell_0258	AMPKARt2	Glucose 17 mM + Glutamine 2.500000e-01 mM + Insulin 10000 ng/ml	0.609812	0.569012	0.473317	0.623742	0.566746	0.507712	0.423714	0.556288	0.603825	0.480955	0.637755	0.446487	0.623494	0.59393	0.544674	0.643063	0.553194	0.609441	0.439788	0.333114	0.450414	0.573833	0.549667	0.47358	0.433578	0.504971	0.464763	0.576756	0.598754	0.572083	0.463503	0.613345	0.557639	0.609838	0.549961	0.444745	0.605327	0.379638	0.622904	0.559898	0.528543	0.645818	0.569607	0.657047	0.545391	0.47717	0.724144
Cell_0259	TFEB_TR	Glucose 17 mM + Glutamine 2.500000e-01 mM + Insulin 10000 ng/ml	0.457046	1.55717	1.10672	2.2685	1.18454	1.23934	1.98673	1.34511	1.49765	1.4408	1.00815	1.43334	1.22054	2.35936	2.10042	1.89708	1.18121	1.69221	1.96156	2.12521	1.02082	1.18601	1.23843	1.57951	1.61587	0.431195	0.705678	1.39534	2.07186	1.64807	1.26763	1.78306	1.19539	2.04287	1.13084	1.98426	0.660483	1.91733	1.41611	3.46445	0.899433	0.710525	1.85164	1.19559	1.72616	2.45723	0.640089
Cell_0259	FOXO_TR	Glucose 17 mM + Glutamine 2.500000e-01 mM + Insulin 10000 ng/ml	1.162	1.45236	1.15044	2.77049	2.09365	1.00254	1.16824	1.27417	2.43389	2.44877	1.3881	0.998744	1.15353	2.78055	2.41904	1.57619	1.2267	1.55171	1.67258	2.52881	1.27096	1.78596	1.2119	2.29836	1.93642	1.69662	1.48766	1.01502	1.25716	2.61881	2.04066	1.70862	1.74144	1.02759	2.51881	3.25119	2.14354	1.47074	1.71438	3.60271	3.47889	1.62269	1.16795	1.35357	2.71381	2.60114	1.47819
Cell_0259	AMPKARt2	Glucose 17 mM + Glutamine 2.500000e-01 mM + Insulin 10000 ng/ml	0.616734	0.584805	0.473594	0.632913	0.564626	0.481168	0.421918	0.553183	0.609797	0.481958	0.631572	0.44217	0.629465	0.591047	0.554641	0.652887	0.536426	0.61907	0.421254	0.330469	0.456403	0.521645	0.550941	0.455529	0.422019	0.666466	0.460389	0.570614	0.618145	0.582249	0.467437	0.623075	0.57044	0.619744	0.550922	0.45345	0.618443	0.365196	0.62369	0.570651	0.522088	0.645573	0.580568	0.65174	0.54968	0.464625	0.734572
Cell_0260	TFEB_TR	Glucose 17 mM + Glutamine 2.500000e-01 mM + Insulin 10000 ng/ml	0.464676	1.4677	1.0724	2.18186	1.29384	1.16297	2.09374	1.57135	1.20604	1.39382	0.992168	1.42265	1.14278	2.39681	2.16577	2.01673	1.06208	1.36088	1.96369	2.0991	1.12305	1.24131	1.2451	1.59807	1.68362	0.431714	0.696161	1.39748	2.00628	1.58048	1.59512	2.00273	1.09987	2.11296	1.09805	1.73386	0.707951	1.98341	1.44447	2.45763	1.14307	0.72567	2.3768	1.35393	1.60598	2.55852	0.677325
Cell_0260	FOXO_TR	Glucose 17 mM + Glutamine 2.500000e-01 mM + Insulin 10000 ng/ml	1.17183	1.3801	1.09195	2.64662	2.1196	1.01553	1.2029	1.2137	2.44634	2.39859	1.36719	0.992167	1.15529	2.69986	2.44989	1.62819	1.19946	1.54516	1.61582	2.47761	1.37275	1.72926	1.22598	2.55727	1.91428	1.69967	1.44086	1.04801	1.61386	2.64961	2.11806	1.73592	1.64258	0.97244	2.49853	3.20969	2.23614	1.44432	1.72439	3.88136	3.53444	1.62677	1.17545	1.35744	2.61731	2.5305	1.55605
Cell_0260	AMPKARt2	Glucose 17 mM + Glutamine 2.500000e-01 mM + Insulin 10000 ng/ml	0.598167	0.613682	0.478801	0.634143	0.568858	0.465347	0.413218	0.564062	0.611084	0.47555	0.638929	0.446912	0.618569	0.596937	0.556746	0.664585	0.551165	0.624375	0.415866	0.332836	0.461125	0.495794	0.554336	0.401812	0.426307	0.687916	0.411197	0.560949	0.63261	0.563715	0.475467	0.624915	0.58271	0.619097	0.549235	0.47277	0.630291	0.365687	0.63634	0.579614	0.558397	0.638117	0.581346	0.662073	0.547279	0.474446	0.73127
Cell_0261	TFEB_TR	Glucose 17 mM + Glutamine 2.500000e-01 mM + Insulin 10000 ng/ml	0.510341	1.3805	1.08806	1.89086	1.38305	1.20206	2.1022	1.44609	1.50046	1.39195	1.05076	1.362	1.08592	2.49264	2.34188	1.78388	1.19798	1.08128	1.91124	2.11852	1.17691	1.28679	1.27683	1.78771	1.66188	0.43131	0.685233	1.67239	1.99161	1.49911	2.06813	2.02763	1.12903	2.19777	1.02387	2.16951	0.670515	2.0154	0.940082	2.18359	1.09859	0.768057	2.67352	1.3913	1.93247	1.95961	0.743149
Cell_0261	FOXO_TR	Glucose 17 mM + Glutamine 2.500000e-01 mM + Insulin 10000 ng/ml	1.26207	1.32715	1.13358	2.60781	2.1284	1.04909	1.20657	1.26422	2.434	2.44493	1.43233	0.978664	1.12499	2.86426	2.47515	1.65922	1.21885	1.44547	1.56042	2.58498	1.3842	1.61718	1.16195	2.72238	1.91033	1.70505	1.51566	1.13338	2.40363	2.57042	1.65022	1.75919	1.45018	1.00889	2.43092	3.20072	2.15426	1.47875	1.74674	3.8685	3.31111	1.53128	1.17437	1.38662	2.61696	2.54875	1.67161
Cell_0261	AMPKARt2	Glucose 17 mM + Glutamine 2.500000e-01 mM + Insulin 10000 ng/ml	0.587348	0.627291	0.484395	0.627856	0.570271	0.483783	0.406809	0.574249	0.605229	0.481927	0.658429	0.440169	0.621147	0.624578	0.551015	0.66327	0.581647	0.619911	0.416832	0.331018	0.457204	0.517693	0.559476	0.373144	0.429186	0.685933	0.373691	0.582961	0.590214	0.565693	0.522442	0.623689	0.577894	0.614208	0.534075	0.518252	0.625537	0.355579	0.637767	0.579428	0.578571	0.64	0.581309	0.66688	0.543185	0.508784	0.728093
Cell_0262	TFEB_TR	Glucose 17 mM + Glutamine 2.500000e-01 mM + Insulin 10000 ng/ml	0.535157	1.32823	1.21184	2.01764	1.44028	1.30072	2.1405	1.27194	1.68547	1.37144	1.09978	1.38711	1.14366	2.53867	2.09027	1.65089	1.18048	1.22355	1.97108	2.19375	1.1767	1.29757	1.22102	1.91709	1.63594	0.439861	0.716274	1.70759	2.09211	1.50468	1.55833	1.69866	1.09581	2.26125	1.12049	2.45354	0.664318	2.16262	0.779953	2.5918	1.02472	0.744549	2.72389	1.29341	2.04899	1.8797	0.755624
Cell_0262	FOXO_TR	Glucose 17 mM + Glutamine 2.500000e-01 mM + Insulin 10000 ng/ml	1.2811	1.33464	1.70448	2.73141	2.12972	1.08151	1.1819	1.2117	2.43089	2.49921	1.52174	0.956508	1.17678	2.99646	2.54445	1.67031	1.19393	1.42172	1.60949	2.68784	1.33016	1.47913	1.13138	3.03619	1.89952	1.70152	1.62537	1.12552	2.9455	2.49015	1.61338	1.77568	1.33682	1.54433	2.38824	3.26503	1.99005	1.54377	1.71922	3.76281	3.22342	1.4614	1.16473	1.39873	2.68258	2.6526	1.70807
Cell_0262	AMPKARt2	Glucose 17 mM + Glutamine 2.500000e-01 mM + Insulin 10000 ng/ml	0.596047	0.622435	0.496528	0.622651	0.564988	0.510731	0.419064	0.578516	0.599077	0.482329	0.649315	0.436287	0.629815	0.657315	0.554215	0.664058	0.569579	0.62422	0.413191	0.332674	0.445907	0.541959	0.560312	0.364727	0.426594	0.684399	0.374298	0.603681	0.51359	0.583451	0.530444	0.604494	0.595053	0.628467	0.525964	0.542487	0.623599	0.398023	0.61936	0.577183	0.568542	0.650498	0.583056	0.663204	0.564121	0.528559	0.737323
Cell_0263	TFEB_TR	Glucose 17 mM + Glutamine 2.500000e-01 mM + Insulin 10000 ng/ml	0.498756	1.27355	1.45613	2.32985	1.00006	1.25549	2.28889	1.32305	1.46078	1.33417	1.07071	1.44719	1.25451	2.45402	1.57805	1.71183	0.903568	1.44892	2.1156	2.21368	1.18925	1.33731	1.19263	1.7179	1.57173	0.448434	0.795854	1.37256	2.27175	1.40206	1.72695	1.57663	1.09891	2.25445	1.19871	0.895316	0.720719	2.2014	1.07598	2.91118	1.28206	0.707886	2.74514	1.34835	1.61993	2.05503	0.768979
Cell_0263	FOXO_TR	Glucose 17 mM + Glutamine 2.500000e-01 mM + Insulin 10000 ng/ml	1.20108	1.33462	2.46509	2.7475	1.61583	1.10268	1.19618	1.17278	2.5187	2.50094	1.4893	0.938865	1.26938	2.85406	2.59598	1.68431	1.13877	1.44311	1.794	2.61719	1.27546	1.43291	1.19118	2.9475	1.82818	1.66033	1.58021	1.09653	2.88358	2.48667	1.5851	1.74702	1.33515	2.23695	2.36226	1.20783	1.91532	1.56132	1.71973	3.73383	3.43161	1.47123	1.15676	1.40961	2.6109	2.57036	1.72827
Cell_0263	AMPKARt2	Glucose 17 mM + Glutamine 2.500000e-01 mM + Insulin 10000 ng/ml	0.587973	0.626839	0.506742	0.619886	0.591083	0.509569	0.426786	0.586877	0.594118	0.469878	0.627665	0.446779	0.623013	0.672584	0.573018	0.672824	0.546874	0.626489	0.406559	0.339374	0.448695	0.525238	0.565443	0.372867	0.441057	0.688733	0.362116	0.608328	0.484912	0.568247	0.536413	0.569284	0.641656	0.639038	0.536606	0.692276	0.63202	0.499257	0.625963	0.564698	0.560024	0.652923	0.580983	0.664213	0.581739	0.523999	0.737682
Cell_0264	TFEB_TR	Glucose 17 mM + Glutamine 2.500000e-01 mM + Insulin 10000 ng/ml	0.468445	1.18949	1.65739	2.30855	1.10585	1.1687	2.43102	1.62183	1.27029	1.37244	0.977505	1.4247	1.28602	2.45284	1.32481	1.91537	1.01321	1.52582	2.23838	2.19602	1.22268	1.38172	1.14701	1.57431	1.54413	0.459847	0.874834	1.00283	2.32629	1.33538	1.92417	1.74858	1.2445	2.20381	1.19869	1.12402	0.751866	2.0501	1.06609	2.99681	1.60735	0.730934	2.78988	1.22746	1.23081	1.67036	0.774038
Cell_0264	FOXO_TR	Glucose 17 mM + Glutamine 2.500000e-01 mM + Insulin 10000 ng/ml	1.19285	1.29929	2.6071	2.72654	1.5622	1.17077	1.24488	1.82367	2.50537	2.59558	1.45147	0.919806	1.19681	2.768	2.5956	1.69137	1.14894	1.41958	2.00304	2.59189	1.25304	1.42609	1.21706	2.63437	1.74568	1.61532	1.51112	1.10157	2.77667	2.43144	1.5818	1.69186	1.29117	2.50005	2.33665	1.20553	1.87952	1.53696	1.97702	3.74211	3.40946	1.42046	1.15652	1.29015	2.52592	2.4261	1.79919
Cell_0264	AMPKARt2	Glucose 17 mM + Glutamine 2.500000e-01 mM + Insulin 10000 ng/ml	0.56263	0.643098	0.492959	0.612175	0.60348	0.482609	0.422421	0.597756	0.585276	0.47158	0.641717	0.449723	0.62663	0.669346	0.577618	0.663707	0.565002	0.625871	0.405332	0.346838	0.456283	0.489993	0.569624	0.408129	0.453603	0.683022	0.335662	0.618042	0.512126	0.557911	0.533492	0.549254	0.660482	0.630874	0.540215	0.694021	0.633157	0.547757	0.645689	0.547754	0.54501	0.63284	0.586662	0.674414	0.56376	0.525992	0.725977
Cell_0265	TFEB_TR	Glucose 17 mM + Glutamine 2.500000e-01 mM + Insulin 10000 ng/ml	0.47854	1.11105	1.65416	2.0587	1.26951	1.12741	2.50859	1.83573	1.2129	1.82364	0.876398	1.38256	1.31395	2.56284	1.36178	2.22972	1.29918	1.56271	2.28745	2.21221	1.24121	1.38748	1.14135	1.7312	1.63769	0.466806	0.938124	1.01709	2.24527	1.45708	1.88713	1.69601	1.29778	2.18911	1.22196	1.05545	0.751732	1.95355	0.9569	3.05047	0.787348	0.77364	2.88331	1.12872	1.39941	1.31561	0.751249
Cell_0265	FOXO_TR	Glucose 17 mM + Glutamine 2.500000e-01 mM + Insulin 10000 ng/ml	1.24382	1.28015	2.2224	2.799	1.52644	1.25416	1.25275	2.708	2.3616	1.83784	1.5165	0.90919	1.2055	2.87826	2.6415	1.69896	1.15352	1.44364	2.14684	2.69299	1.27857	1.32708	1.17648	2.8373	1.72688	1.62776	1.55098	1.07011	2.91974	2.33449	1.58687	1.6901	1.21152	2.47226	2.33412	1.2012	1.82547	1.51066	2.36365	3.76419	2.0464	1.35686	1.16527	1.26168	2.58709	2.42393	1.82904
Cell_0265	AMPKARt2	Glucose 17 mM + Glutamine 2.500000e-01 mM + Insulin 10000 ng/ml	0.558885	0.640395	0.472633	0.601947	0.594036	0.458294	0.429294	0.592647	0.580244	0.534389	0.659895	0.435674	0.643683	0.662973	0.569467	0.647882	0.590389	0.638916	0.406226	0.344688	0.446508	0.48781	0.561866	0.432585	0.447825	0.679997	0.335145	0.630501	0.5314	0.584485	0.530491	0.551689	0.649678	0.632452	0.533521	0.696819	0.628268	0.534269	0.601725	0.543151	0.616771	0.601887	0.598721	0.686099	0.546034	0.5423	0.721604
Cell_0266	TFEB_TR	Glucose 17 mM + Glutamine 2.500000e-01 mM + Insulin 10000 ng/ml	0.474857	1.10022	1.55713	1.92321	1.2398	1.23492	2.60702	1.79891	1.23008	1.86097	0.937249	1.38424	1.44232	2.52737	1.70441	2.3365	1.11436	1.5191	2.25302	2.20613	1.23025	1.39059	1.31251	1.79158	1.58827	0.449597	0.997758	1.3813	2.30498	1.45249	1.7956	1.62414	1.15884	2.15057	1.1554	0.981521	0.798748	1.9033	1.21735	3.55401	0.900353	0.819469	2.92735	1.78942	1.66094	1.3996	0.793272
Cell_0266	FOXO_TR	Glucose 17 mM + Glutamine 2.500000e-01 mM + Insulin 10000 ng/ml	1.21008	1.30027	1.98584	2.79609	1.50745	1.25859	1.22445	2.83097	2.341	1.88769	1.61092	0.912152	1.61345	2.92853	2.86231	1.73317	1.10013	1.40283	2.18923	2.68227	1.29696	1.22918	1.17094	3.19614	1.75348	1.65762	1.57431	1.03498	3.04071	2.39401	1.57513	1.70764	1.17118	2.41557	2.33999	1.19664	1.83673	1.49565	2.50698	3.75567	2.12269	1.38641	1.17246	1.89357	2.55878	2.45642	1.78589
Cell_0266	AMPKARt2	Glucose 17 mM + Glutamine 2.500000e-01 mM + Insulin 10000 ng/ml	0.581305	0.625862	0.478061	0.60532	0.586128	0.449929	0.433146	0.577893	0.582819	0.565551	0.635925	0.427768	0.621035	0.661964	0.575535	0.657634	0.6054	0.651165	0.400082	0.329997	0.438993	0.507694	0.559954	0.415446	0.454544	0.685024	0.344918	0.637276	0.529611	0.600997	0.532401	0.55845	0.650902	0.638063	0.538171	0.698966	0.631221	0.537575	0.519852	0.545537	0.614503	0.596722	0.597289	0.676195	0.549708	0.554108	0.717776
Cell_0267	TFEB_TR	Glucose 17 mM + Glutamine 2.500000e-01 mM + Insulin 10000 ng/ml	0.447271	1.10506	1.52705	1.96246	1.0769	1.44777	2.71649	1.80195	1.42147	2.08046	1.12662	1.39286	1.53665	2.42408	1.14514	2.32611	0.959305	1.44511	2.23824	2.1486	1.2139	1.44633	1.33014	1.64989	1.48459	0.445426	1.0355	1.47789	2.47017	1.2421	1.64454	1.70742	1.18525	2.05703	1.06701	1.02224	0.88116	1.81861	1.15515	4.39884	0.718945	0.865208	2.89999	2.34265	1.57599	0.523759	0.858931
Cell_0267	FOXO_TR	Glucose 17 mM + Glutamine 2.500000e-01 mM + Insulin 10000 ng/ml	1.12728	1.33484	1.99878	2.6968	1.49364	1.23951	1.22225	2.61155	2.41526	1.91731	1.68108	0.900735	2.19761	2.85306	1.48853	1.78768	1.09795	1.44603	2.17612	2.59933	1.29169	1.22965	1.17194	3.10221	1.82575	1.64756	1.55415	1.05304	3.07056	2.51305	1.5655	1.71146	1.10711	2.34613	2.37184	1.18649	1.87449	1.50516	2.37306	3.68505	2.14553	1.37236	1.17135	2.83055	2.40049	1.75756	1.77691
Cell_0267	AMPKARt2	Glucose 17 mM + Glutamine 2.500000e-01 mM + Insulin 10000 ng/ml	0.600811	0.63381	0.491871	0.626015	0.597982	0.45532	0.418203	0.575312	0.575654	0.561937	0.60628	0.44002	0.555952	0.659032	0.678501	0.662697	0.63485	0.653384	0.392726	0.34437	0.455646	0.501984	0.568347	0.375316	0.46715	0.682277	0.336071	0.641647	0.542909	0.602064	0.53492	0.558054	0.64956	0.63043	0.543929	0.699069	0.630137	0.556831	0.513448	0.536374	0.599775	0.618857	0.590234	0.647573	0.546827	0.602351	0.703765
Cell_0268	TFEB_TR	Glucose 17 mM + Glutamine 2.500000e-01 mM + Insulin 10000 ng/ml	0.44243	1.03745	1.53559	2.03197	1.09149	1.4145	2.72774	1.83943	1.54794	1.97358	1.13102	1.39044	1.63777	2.52451	1.03317	2.33849	1.21724	1.7825	2.32286	2.07143	1.22941	1.52632	1.19384	1.59181	1.60594	0.453948	1.09059	1.20982	2.45488	1.28874	1.84362	1.49732	1.45208	2.04038	1.17589	0.977188	0.93447	1.79458	0.78116	4.39763	0.578792	0.844817	2.74744	1.81674	1.61298	0.530267	0.859114
Cell_0268	FOXO_TR	Glucose 17 mM + Glutamine 2.500000e-01 mM + Insulin 10000 ng/ml	1.08591	1.33535	2.0147	2.64906	1.46875	1.25748	1.22332	2.60582	2.40164	1.97807	1.63709	0.882166	2.71696	2.80924	1.35901	1.82969	1.14763	2.18183	2.2091	2.6424	1.35067	1.24688	1.08667	2.85911	1.89131	1.63743	1.5713	1.06477	3.0729	2.51484	1.5853	1.74425	1.0325	2.37988	2.46904	1.18041	1.84793	1.52668	2.21264	3.61047	2.0878	1.27792	1.17047	3.17759	2.42391	1.84737	1.84332
Cell_0268	AMPKARt2	Glucose 17 mM + Glutamine 2.500000e-01 mM + Insulin 10000 ng/ml	0.605692	0.649876	0.484965	0.644282	0.610371	0.464021	0.406249	0.57385	0.566028	0.555539	0.607027	0.452489	0.50567	0.647395	0.667319	0.631789	0.655023	0.648259	0.389974	0.404696	0.475384	0.485834	0.572843	0.344204	0.457974	0.679696	0.327598	0.639015	0.560558	0.607537	0.546311	0.555428	0.637103	0.628282	0.532463	0.695931	0.618676	0.559812	0.588483	0.523589	0.594734	0.63077	0.598249	0.640552	0.536877	0.606602	0.694346
Cell_0269	TFEB_TR	Glucose 17 mM + Glutamine 2.500000e-01 mM + Insulin 10000 ng/ml	0.464688	0.973908	1.562	1.98035	1.1948	1.18052	2.67993	1.73273	1.37775	1.66807	0.994162	1.39003	1.86072	2.66486	1.06782	2.07961	1.25099	2.33265	2.37435	0.956773	1.24154	1.54198	1.38464	1.54472	1.6702	0.429471	1.17875	1.0617	2.32391	1.59768	2.24207	1.33718	1.50967	2.06228	1.27904	0.862068	0.939854	1.75869	1.16424	3.65692	0.672749	0.78922	2.57781	1.35217	1.83416	0.534978	0.907962
Cell_0269	FOXO_TR	Glucose 17 mM + Glutamine 2.500000e-01 mM + Insulin 10000 ng/ml	1.06749	1.27605	2.02298	2.58342	1.4337	1.22383	1.21785	2.5252	2.37473	2.03787	1.48124	0.885431	2.97829	2.83193	1.30271	1.84025	1.14724	3.21535	2.21896	1.73246	1.44218	1.2432	1.14168	2.71401	1.86807	1.66652	1.57047	1.03854	3.03837	2.5183	1.6058	1.73499	1.04761	2.45244	2.58433	1.18482	1.81858	1.53153	2.21721	3.6075	2.05787	1.2583	1.17499	3.05031	2.52293	2.03016	1.89462
Cell_0269	AMPKARt2	Glucose 17 mM + Glutamine 2.500000e-01 mM + Insulin 10000 ng/ml	0.607394	0.648153	0.468393	0.649951	0.610164	0.459	0.404885	0.567542	0.57634	0.567662	0.607143	0.448332	0.486833	0.641219	0.668934	0.598821	0.648341	0.608146	0.388422	0.674914	0.476223	0.498572	0.582473	0.342013	0.452187	0.685425	0.338091	0.634296	0.551792	0.597088	0.559003	0.562792	0.647339	0.630613	0.513878	0.695602	0.615514	0.54286	0.642698	0.524449	0.599166	0.627031	0.607366	0.654259	0.540264	0.618282	0.695817
Cell_0270	TFEB_TR	Glucose 17 mM + Glutamine 2.500000e-01 mM + Insulin 10000 ng/ml	0.477569	0.987697	1.63916	1.89409	1.156	1.14053	2.69447	1.71069	1.23889	1.79149	0.982312	1.38067	1.90246	2.57462	1.06536	2.01068	0.993654	2.37134	2.29312	1.05595	1.17271	1.51489	1.63871	1.45657	1.59839	0.434223	1.16549	1.00903	2.30055	1.64929	2.05581	1.65418	1.2518	1.98391	1.16889	0.801047	0.92956	1.6371	1.66646	3.6241	0.721462	0.843016	2.82772	1.66827	1.7293	0.545758	1.02762
Cell_0270	FOXO_TR	Glucose 17 mM + Glutamine 2.500000e-01 mM + Insulin 10000 ng/ml	1.04379	1.23884	2.06683	2.54096	1.41733	1.14424	1.25041	2.545	2.42108	2.04646	1.39916	0.882635	2.78158	2.85202	1.30505	1.82286	1.12782	3.50475	2.1349	1.73964	1.44212	1.2514	1.70084	2.5533	1.85923	1.71222	1.52866	1.02306	3.05756	2.59439	1.5797	1.64236	1.1113	2.38487	2.65216	1.18272	1.78913	1.51727	2.42144	3.66178	2.1036	1.27851	1.1736	3.01981	2.45312	2.11812	1.86154
Cell_0270	AMPKARt2	Glucose 17 mM + Glutamine 2.500000e-01 mM + Insulin 10000 ng/ml	0.605777	0.645079	0.458569	0.65237	0.604129	0.4397	0.408503	0.57777	0.585555	0.574039	0.593092	0.445989	0.479378	0.6521	0.678145	0.580762	0.647922	0.544836	0.39329	0.676874	0.467203	0.51514	0.58737	0.350716	0.463497	0.682887	0.350536	0.640992	0.537149	0.580627	0.553953	0.581636	0.66761	0.624739	0.503029	0.702924	0.621922	0.511283	0.632953	0.527891	0.596061	0.626408	0.602862	0.658858	0.543351	0.623378	0.695682
Cell_0271	TFEB_TR	Glucose 17 mM + Glutamine 2.500000e-01 mM + Insulin 10000 ng/ml	0.473025	0.988692	1.69831	1.93542	1.02579	1.22821	2.71499	1.80225	1.34029	1.93057	1.07276	1.32848	1.79549	2.47678	0.992558	2.55211	0.96469	2.02622	2.17296	1.33659	1.07935	1.54712	1.519	1.61459	0.968855	0.491409	1.0709	0.959786	2.35284	1.53686	1.65048	1.78312	0.991754	1.9126	1.12184	0.829411	0.990944	1.61597	1.32657	3.94806	0.671477	0.971095	3.10903	1.79839	1.64759	0.541362	1.08321
Cell_0271	FOXO_TR	Glucose 17 mM + Glutamine 2.500000e-01 mM + Insulin 10000 ng/ml	1.02115	1.28961	2.09595	2.79196	1.43249	1.12108	1.26045	2.84679	2.50406	2.02483	1.38148	0.86597	2.59749	2.87449	1.28787	1.79441	1.13246	3.34888	2.08702	1.80768	1.41085	1.24332	2.58633	2.52848	1.66222	1.75716	1.51886	1.14348	3.11312	2.69531	1.53577	1.60885	1.09306	2.34832	2.64738	1.17346	1.67164	1.48189	2.65198	3.64493	2.13173	1.24969	1.16504	3.06637	2.39576	1.95713	1.78957
Cell_0271	AMPKARt2	Glucose 17 mM + Glutamine 2.500000e-01 mM + Insulin 10000 ng/ml	0.595751	0.650844	0.452174	0.652402	0.599764	0.429544	0.418849	0.587675	0.571804	0.566365	0.588149	0.457034	0.478634	0.656621	0.672601	0.551926	0.652417	0.523688	0.403719	0.685865	0.457595	0.509341	0.558908	0.339519	0.69398	0.672326	0.358213	0.650372	0.536038	0.577766	0.550443	0.599027	0.66256	0.623609	0.507045	0.703712	0.622885	0.496077	0.605745	0.524532	0.591126	0.625164	0.607524	0.661195	0.534751	0.612977	0.69138
Cell_0272	TFEB_TR	Glucose 17 mM + Glutamine 2.500000e-01 mM + Insulin 10000 ng/ml	0.47513	0.94803	1.73016	1.96195	0.961118	1.17787	2.6779	1.69924	1.50036	2.14528	1.22997	1.25862	2.04079	2.58032	0.988307	2.88139	1.07159	1.87262	2.09182	1.5632	1.08767	1.59931	1.34115	1.92544	0.845452	0.501125	1.08116	1.1005	2.35539	1.69294	1.66994	1.64712	0.942386	1.94101	1.26609	0.937754	1.10388	1.72409	1.43739	3.64848	0.665849	1.00357	2.93941	1.60113	1.9854	0.520221	1.11165
Cell_0272	FOXO_TR	Glucose 17 mM + Glutamine 2.500000e-01 mM + Insulin 10000 ng/ml	1.00885	1.29769	2.12275	3.15871	1.44929	1.1049	1.26003	2.91538	2.66373	1.99148	1.36438	0.876276	2.84335	2.9224	1.24454	1.75055	1.09022	3.47189	2.09221	1.83521	1.44127	1.20771	3.14774	2.7057	1.63719	1.78889	1.52907	1.52827	3.05397	2.83789	1.53954	1.67207	0.987118	2.45057	2.54678	1.16756	1.5268	1.46316	2.71113	3.54743	2.14332	1.24225	1.16034	3.05595	2.36346	1.74966	1.7151
Cell_0272	AMPKARt2	Glucose 17 mM + Glutamine 2.500000e-01 mM + Insulin 10000 ng/ml	0.594374	0.653748	0.450084	0.64446	0.609657	0.450328	0.428968	0.571934	0.563098	0.566705	0.577719	0.457497	0.485185	0.638905	0.6594	0.524498	0.648971	0.545715	0.402728	0.693657	0.445282	0.511706	0.517501	0.316567	0.692469	0.654479	0.373658	0.654624	0.534932	0.5749	0.564325	0.602999	0.648192	0.62363	0.525165	0.695064	0.61583	0.510333	0.597431	0.526185	0.584005	0.616558	0.626864	0.656974	0.533534	0.601296	0.687971
Cell_0273	TFEB_TR	Glucose 17 mM + Glutamine 2.500000e-01 mM + Insulin 10000 ng/ml	0.485052	0.948657	1.83654	1.93831	1.03661	1.10615	2.689	1.48685	1.64235	3.24987	1.34573	1.25671	2.41365	2.613	0.985155	2.84155	1.04734	2.06722	2.09427	1.44603	1.16949	1.57729	1.27815	2.01668	0.895083	0.489934	1.09105	1.14858	2.30405	0.733365	1.65231	1.76627	1.12958	1.96768	1.31443	1.09843	1.11168	1.77422	2.34499	3.54806	0.68053	0.984261	2.99417	1.79198	2.13009	0.511213	1.17401
Cell_0273	FOXO_TR	Glucose 17 mM + Glutamine 2.500000e-01 mM + Insulin 10000 ng/ml	1.00777	1.27481	2.19805	3.21944	1.45268	1.03837	1.31756	2.76516	2.83918	1.98154	1.42292	0.876895	3.01738	2.9404	1.21872	1.66719	1.01111	3.5448	2.07955	1.81074	1.44879	1.19396	3.14298	2.86842	1.69906	1.76885	1.52303	2.02629	2.95137	1.6356	1.57259	1.71682	1.08452	2.49126	2.4191	1.17925	1.45386	1.4752	2.70791	3.50303	2.17607	1.25426	1.13752	3.07076	2.19506	1.71027	1.59845
Cell_0273	AMPKARt2	Glucose 17 mM + Glutamine 2.500000e-01 mM + Insulin 10000 ng/ml	0.606414	0.655117	0.455738	0.640163	0.62908	0.48804	0.431866	0.560711	0.575383	0.583867	0.55457	0.444926	0.4965	0.623772	0.665007	0.53373	0.658496	0.561969	0.391554	0.695428	0.431458	0.527046	0.49146	0.301434	0.703579	0.609146	0.389666	0.664647	0.538466	0.504143	0.566371	0.602137	0.646468	0.614046	0.538207	0.699958	0.610533	0.513017	0.600023	0.53673	0.575301	0.610205	0.630918	0.633905	0.537832	0.603286	0.681924
Cell_0274	TFEB_TR	Glucose 17 mM + Glutamine 2.500000e-01 mM + Insulin 10000 ng/ml	0.481352	1.00822	1.9389	2.11839	1.12227	1.17917	2.72935	1.53718	1.60227	3.85862	1.20165	1.30968	2.53057	2.54772	0.92312	3.02867	0.943834	2.32779	2.17566	1.2241	1.23192	1.52959	1.23037	1.99719	0.981133	0.550823	0.987164	0.955288	2.28445	0.717162	1.33824	1.72764	1.24968	1.99058	1.24499	1.20629	1.04705	1.7691	2.27825	3.90272	0.762428	1.02145	3.18831	2.08908	1.89696	0.501382	1.19199
Cell_0274	FOXO_TR	Glucose 17 mM + Glutamine 2.500000e-01 mM + Insulin 10000 ng/ml	1.00129	1.58973	2.2751	3.15169	1.48195	0.998432	1.24641	2.83716	2.80915	1.98843	1.38819	0.849846	2.96783	2.89537	1.19651	1.59651	0.999307	3.43251	2.12444	1.86314	1.39643	1.20109	2.99317	2.97372	1.76842	1.68319	1.52226	2.3511	2.97561	1.63649	1.56714	1.71408	1.66211	2.47385	2.42479	1.21888	1.40708	1.4194	2.85337	3.45287	2.17245	1.2501	1.1128	3.07922	2.09126	1.73341	1.4841
Cell_0274	AMPKARt2	Glucose 17 mM + Glutamine 2.500000e-01 mM + Insulin 10000 ng/ml	0.615849	0.645794	0.454696	0.654174	0.621439	0.503339	0.428962	0.569547	0.582696	0.593989	0.559655	0.449189	0.505025	0.624772	0.681092	0.544919	0.666021	0.56627	0.389844	0.694412	0.413016	0.527143	0.478773	0.299856	0.707448	0.559941	0.394847	0.674306	0.548933	0.532027	0.547892	0.61121	0.642044	0.612133	0.530553	0.708982	0.61836	0.497865	0.600196	0.54675	0.583258	0.6168	0.621959	0.626294	0.53154	0.617187	0.675698
Cell_0275	TFEB_TR	Glucose 17 mM + Glutamine 2.500000e-01 mM + Insulin 10000 ng/ml	0.466361	1.11253	1.88998	0.961418	1.07024	1.26273	2.72505	1.93473	1.34145	2.75724	1.06228	1.31737	2.69737	2.66474	0.888536	2.92424	0.867607	2.19302	2.16547	1.17094	1.27448	1.5382	1.34607	2.07951	1.00445	0.655888	1.00603	0.956865	2.31496	0.738576	1.17329	1.5126	1.09742	2.05034	0.466816	1.0845	1.06834	1.78967	1.52629	3.6576	0.859119	1.04025	2.79213	1.85979	1.82384	0.47896	1.13638
Cell_0275	FOXO_TR	Glucose 17 mM + Glutamine 2.500000e-01 mM + Insulin 10000 ng/ml	0.984709	2.21647	2.26175	1.08741	1.53497	1.00389	1.22959	2.92617	2.6793	1.96165	1.18929	0.876923	3.14784	2.85403	1.1672	1.58486	1.02744	3.53664	2.17179	1.96433	1.34964	1.22307	2.97849	3.04598	1.81536	1.56993	1.51722	2.51763	3.06397	1.66899	1.52188	1.67834	2.34269	2.52008	1.35775	1.23086	1.34835	1.43837	3.01367	3.33535	2.13586	1.28011	1.14419	2.99672	2.12477	1.68223	1.45737
Cell_0275	AMPKARt2	Glucose 17 mM + Glutamine 2.500000e-01 mM + Insulin 10000 ng/ml	0.626033	0.602094	0.437466	0.442168	0.586947	0.493931	0.430419	0.574948	0.581623	0.587988	0.57935	0.463968	0.498744	0.627995	0.684974	0.511458	0.656537	0.569218	0.3964	0.693719	0.392415	0.523915	0.494325	0.31035	0.697382	0.548686	0.389599	0.667284	0.543856	0.532932	0.530155	0.616462	0.603999	0.621634	0.468107	0.678366	0.626374	0.501827	0.596978	0.545457	0.588276	0.626457	0.623282	0.637958	0.529235	0.625601	0.67853
Cell_0276	TFEB_TR	Glucose 17 mM + Glutamine 2.500000e-01 mM + Insulin 10000 ng/ml	0.458479	1.27078	1.79951	1.01057	1.12774	1.21588	2.8332	2.32552	1.38406	1.96347	1.21552	1.29367	2.79787	2.73912	0.890514	2.30271	0.907808	2.01885	2.06262	1.14247	1.30335	1.64093	1.46541	2.02024	0.923612	0.762397	1.11973	1.09927	2.29278	0.746585	1.3181	1.74137	1.03594	2.05314	0.44521	0.906456	1.14192	1.85792	1.6971	3.09509	0.722271	1.02631	2.40084	1.4525	1.86292	0.462169	1.07735
Cell_0276	FOXO_TR	Glucose 17 mM + Glutamine 2.500000e-01 mM + Insulin 10000 ng/ml	0.978144	2.56387	2.1819	1.04695	1.53111	1.00935	1.92939	2.8045	2.74284	1.96522	1.15029	0.887094	3.34145	2.87118	1.16751	1.53802	1.03763	3.64533	2.09225	1.98745	1.29041	1.30559	2.88081	2.96505	1.83712	1.47943	1.49786	2.63912	3.05189	1.6764	1.47757	1.61378	2.55356	2.51228	1.41371	1.17748	1.33544	1.89892	2.96028	3.32263	2.12448	1.29213	1.13665	2.93687	2.09556	1.62671	1.45101
Cell_0276	AMPKARt2	Glucose 17 mM + Glutamine 2.500000e-01 mM + Insulin 10000 ng/ml	0.633486	0.542858	0.424851	0.441614	0.577098	0.488003	0.446424	0.5771	0.589446	0.593833	0.568461	0.466215	0.487096	0.631359	0.675138	0.503823	0.665732	0.566961	0.397276	0.699297	0.390172	0.525924	0.544012	0.314552	0.69489	0.55292	0.378531	0.651319	0.529314	0.544913	0.511931	0.606933	0.531811	0.625337	0.487676	0.614863	0.614686	0.50371	0.593325	0.537598	0.555973	0.617544	0.627498	0.627444	0.536955	0.619265	0.681117
Cell_0277	TFEB_TR	Glucose 17 mM + Glutamine 2.500000e-01 mM + Insulin 10000 ng/ml	0.46386	1.45043	1.80869	0.949276	1.35937	1.11931	3.0397	2.37874	1.41568	2.33975	1.34647	1.35505	2.55181	2.6224	0.91584	2.08777	1.01173	2.37645	2.1104	1.14412	1.32918	1.79469	1.30425	1.76255	0.733656	0.82958	1.02635	1.07857	2.24465	0.718729	1.5312	1.88731	1.15251	1.99516	0.456849	1.05745	1.20633	2.04596	2.05148	0.711599	0.560854	1.056	2.38797	1.53981	1.88548	0.452851	1.15112
Cell_0277	FOXO_TR	Glucose 17 mM + Glutamine 2.500000e-01 mM + Insulin 10000 ng/ml	0.974161	2.56357	2.15862	1.03757	1.45954	1.0515	3.00794	2.76082	1.55772	2.02788	1.25793	0.841738	3.2821	2.91384	1.2194	1.44493	1.06574	3.5202	2.03542	1.96279	1.22048	1.36015	2.68054	2.73582	1.76546	1.4524	1.51649	2.67345	2.96352	1.64821	1.44185	1.57382	2.46562	2.42044	1.4635	1.13517	1.36194	2.63612	2.8627	1.09849	2.10561	1.22337	1.10141	3.0197	2.0859	1.63768	1.39857
Cell_0277	AMPKARt2	Glucose 17 mM + Glutamine 2.500000e-01 mM + Insulin 10000 ng/ml	0.619262	0.510296	0.429925	0.467064	0.597658	0.491099	0.457854	0.573658	0.669579	0.604611	0.562905	0.474955	0.485741	0.63763	0.664256	0.583068	0.680232	0.561398	0.398848	0.710685	0.405824	0.518397	0.585539	0.307942	0.704534	0.545858	0.38539	0.641251	0.532925	0.565754	0.49988	0.606453	0.479283	0.622651	0.484925	0.574394	0.605719	0.461445	0.589581	0.575184	0.518687	0.601234	0.63225	0.608275	0.539332	0.6181	0.676409
Cell_0278	TFEB_TR	Glucose 17 mM + Glutamine 2.500000e-01 mM + Insulin 10000 ng/ml	0.470231	1.56317	1.83043	0.882655	1.25357	1.11123	3.08761	2.38752	1.39845	2.31096	1.30397	1.53032	2.54522	2.73629	0.981048	2.23667	1.09404	2.50937	2.21085	1.23814	1.40398	1.82629	1.20196	1.75925	0.62118	0.855715	0.893499	1.1053	2.32036	0.709038	1.55685	1.55868	1.18105	1.99901	0.482005	1.31748	1.27355	2.22838	1.78519	0.806639	0.682551	1.08043	2.22738	1.82334	2.1112	0.456488	1.31137
Cell_0278	FOXO_TR	Glucose 17 mM + Glutamine 2.500000e-01 mM + Insulin 10000 ng/ml	0.946936	2.61111	2.19275	1.0408	1.40179	1.13848	3.39095	2.87776	1.57456	2.02659	1.25102	1.10477	3.39645	2.94539	1.29756	1.41775	1.03575	3.48446	2.08365	1.96185	1.22902	1.30463	2.64269	2.54587	1.67296	1.47371	1.54824	2.68301	2.95305	1.63231	1.41596	1.57384	2.44788	2.41093	1.55005	1.13746	1.36077	3.08484	2.93134	1.06346	2.04858	1.15675	1.45422	3.12944	2.16588	1.62877	1.34784
Cell_0278	AMPKARt2	Glucose 17 mM + Glutamine 2.500000e-01 mM + Insulin 10000 ng/ml	0.603014	0.506081	0.433678	0.479533	0.604118	0.506117	0.444079	0.55061	0.672734	0.58605	0.585157	0.497367	0.487853	0.637811	0.664192	0.650005	0.668366	0.557633	0.408563	0.717619	0.417431	0.520285	0.586846	0.314405	0.710756	0.547295	0.413425	0.640152	0.55399	0.560999	0.508034	0.621298	0.472035	0.619526	0.489043	0.573663	0.617018	0.407989	0.581007	0.578875	0.503163	0.600481	0.6441	0.605787	0.545595	0.623342	0.679052
Cell_0279	TFEB_TR	Glucose 17 mM + Glutamine 2.500000e-01 mM + Insulin 10000 ng/ml	0.460708	1.54772	1.78775	0.90101	0.945234	1.18871	3.03082	2.59593	1.48769	1.98575	1.28849	1.73776	2.90648	0.629555	1.03903	2.21746	1.1803	2.10328	2.12455	1.21098	1.48316	1.76558	1.42316	2.00756	0.651604	0.942938	0.978463	1.14487	2.40524	0.72668	1.5263	1.55256	1.33783	2.06844	0.498021	1.26217	1.31289	2.24385	1.96906	0.841018	0.778908	1.07184	2.21666	1.66268	1.05981	0.460199	1.27938
[truncated: 317 more rows]
[truncated: 15 more columns]

## Sheet: condition 02
Treatment Spike															Glucose 17 mM + Glutamine 2.500000e-01 mM																									Vehicle
[truncated: 1,096 more rows]
[truncated: 15 more columns]

## Sheet: condition 03
Treatment Spike															Insulin 10000 ng/ml																									Glucose 17 mM + Glutamine 2.500000e-01 mM
[truncated: 1,144 more rows]
[truncated: 15 more columns]

## Sheet: condition 04
Treatment Spike															Insulin 10000 ng/ml																									Vehicle
[truncated: 1,048 more rows]
[truncated: 15 more columns]
