# Supplementary material for: Continuous sensing of nutrients and growth factors by the mTORC1-TFEB axis
Source: eLife. 2023 Sep 12;12:e74903. doi: 10.7554/eLife.74903 (PMC10547473; doi:10.7554/eLife.74903)
Supplement: Figure 4—source data 3. [file elife-74903-fig4-data3.xlsx]

## Sheet: condition 01
Treatment Spike															Glucose 17 mM + Glutamine 2.500000e-01 mM																									EAA 1.000000e-01 X
Cell	Signal	Treatment Group	0 minute	6 minute	12 minute	18 minute	24 minute	30 minute	36 minute	42 minute	48 minute	54 minute	60 minute	66 minute	72 minute	78 minute	84 minute	90 minute	96 minute	102 minute	108 minute	114 minute	120 minute	126 minute	132 minute	138 minute	144 minute	150 minute	156 minute	162 minute	168 minute	174 minute	180 minute	186 minute	192 minute	198 minute	204 minute	210 minute	216 minute	222 minute	228 minute	234 minute	240 minute	246 minute	252 minute	258 minute	264 minute	270 minute	276 minute
Cell_0001	TFEB_TR	Glucose 17 mM + Glutamine 2.500000e-01 mM + EAA 1.000000e-01 X	0.955661	2.00111	1.26107	0.934147	1.37341	1.43524	0.63692	1.78634	1.62704	1.18881	1.90885	1.54497	1.6373	1.71938	0.803817	1.14649	1.36895	1.07134	1.25911	1.01114	0.881635	1.07594	1.28602	1.19487	2.01996	0.771608	1.35985	0.966435	1.65159	2.17106	1.91289	1.18355	2.03279	2.02748	1.29216	1.80985	1.36674	0.992962	1.20891	2.00861	0.824571	0.986779	1.27522	1.7628	1.86083	1.30517	2.13266
Cell_0001	FOXO_TR	Glucose 17 mM + Glutamine 2.500000e-01 mM + EAA 1.000000e-01 X	1.89427	1.4805	1.2775	1.36963	1.19408	1.28516	1.17919	1.03498	1.64015	1.89271	1.26414	1.53629	2.37821	2.40477	1.80885	1.5315	1.44716	1.35975	1.10241	1.26067	2.4464	1.26089	1.09609	1.88255	1.73905	1.0977	1.50208	1.16263	1.38451	1.34022	1.18397	2.97086	1.41646	1.31723	2.19493	1.2217	1.4515	1.59049	1.55723	1.20484	1.79287	1.19661	1.58565	1.9248	1.43136	1.04938	1.61873
Cell_0001	AMPKARt2	Glucose 17 mM + Glutamine 2.500000e-01 mM + EAA 1.000000e-01 X	0.544772	0.523402	0.620085	0.761122	0.569418	0.595474	0.662472	0.50698	0.53224	0.653623	0.536086	0.540995	0.533313	0.662664	0.725075	0.523152	0.457942	0.684102	0.413802	0.480811	0.605331	0.657004	0.666523	0.60678	0.60211	0.55666	0.436917	0.598999	0.616911	0.684356	0.523422	0.389689	0.556304	0.551336	0.683016	0.665189	0.693996	0.61906	0.665872	0.57668	0.71446	0.535274	0.667039	0.421263	0.545611	0.606978	0.548941
Cell_0002	TFEB_TR	Glucose 17 mM + Glutamine 2.500000e-01 mM + EAA 1.000000e-01 X	0.932658	1.84228	1.26838	0.839448	1.86246	1.40194	0.668707	1.94591	1.58069	1.21462	1.69402	1.63864	1.69515	1.38822	0.877752	1.05946	1.43024	1.20903	1.26405	1.03037	0.86049	1.04861	1.42802	1.16359	2.06187	0.767639	1.58616	0.986458	1.54916	2.06198	1.88933	1.42482	2.0004	2.06946	1.45648	1.63628	1.43755	1.35294	1.21336	2.026	1.0978	1.08348	1.41428	1.81783	1.67429	1.40624	2.25346
Cell_0002	FOXO_TR	Glucose 17 mM + Glutamine 2.500000e-01 mM + EAA 1.000000e-01 X	1.93358	1.46927	1.28611	1.36722	1.22559	1.30124	1.17741	1.04456	1.57109	1.92594	1.21797	1.5376	2.50703	2.41761	1.81499	1.47404	1.48404	1.35994	1.10885	1.29079	2.38343	1.1609	1.06009	1.91372	1.7685	1.08628	1.50597	1.20083	1.33475	1.26659	1.21919	2.9754	1.41382	1.31276	2.19126	1.1692	1.45142	1.54089	1.53022	1.18521	1.81506	1.20073	1.61264	1.78731	1.46503	1.08366	1.59519
Cell_0002	AMPKARt2	Glucose 17 mM + Glutamine 2.500000e-01 mM + EAA 1.000000e-01 X	0.571451	0.519495	0.625929	0.762092	0.561063	0.604919	0.665973	0.505705	0.534309	0.645013	0.54752	0.53219	0.529259	0.652461	0.727827	0.522511	0.466932	0.687755	0.40652	0.49013	0.598099	0.664845	0.669155	0.600395	0.610393	0.557461	0.432972	0.610048	0.59625	0.684326	0.527213	0.401403	0.549862	0.543003	0.691979	0.665025	0.685015	0.636819	0.664808	0.583524	0.703636	0.532895	0.674811	0.391866	0.550006	0.619573	0.552243
Cell_0003	TFEB_TR	Glucose 17 mM + Glutamine 2.500000e-01 mM + EAA 1.000000e-01 X	1.17686	1.8105	1.27307	0.810886	2.03487	1.34354	0.669559	1.96424	1.48568	1.32362	1.87533	1.46969	1.84459	1.00342	0.763238	1.15429	1.35121	1.14619	1.4046	1.03934	0.863953	1.01271	1.18249	1.27003	1.94632	0.766078	1.83535	1.02332	1.60899	1.47689	1.92034	1.44675	1.78322	2.13354	1.42925	1.55359	1.5253	1.38947	1.20212	1.93118	1.42044	1.06204	1.66173	1.70225	1.60239	1.35512	2.367
Cell_0003	FOXO_TR	Glucose 17 mM + Glutamine 2.500000e-01 mM + EAA 1.000000e-01 X	1.90522	1.49612	1.28218	1.31743	1.2168	1.30856	1.14136	1.03689	1.62467	1.91414	1.27428	1.57333	2.38586	2.50953	1.41016	1.5114	1.54709	1.38209	1.09551	1.28553	2.35978	1.13863	1.03557	2.14925	1.83543	1.11418	1.41377	1.22854	1.32044	1.2128	1.17716	2.78029	1.43068	1.27791	2.12448	1.20289	1.53585	1.45699	1.49978	1.14496	1.91124	1.15052	1.70017	1.73968	1.46264	2.21622	1.57704
Cell_0003	AMPKARt2	Glucose 17 mM + Glutamine 2.500000e-01 mM + EAA 1.000000e-01 X	0.566614	0.514519	0.631143	0.764386	0.552365	0.618028	0.668423	0.513947	0.518269	0.628879	0.544266	0.536805	0.50535	0.640381	0.581837	0.541665	0.479336	0.679936	0.410287	0.487015	0.586529	0.669434	0.673043	0.616065	0.602729	0.553164	0.409389	0.619479	0.601379	0.686076	0.522523	0.407716	0.543837	0.53203	0.68892	0.670523	0.681803	0.623299	0.670268	0.597898	0.691211	0.54172	0.688609	0.39911	0.558477	0.550109	0.54547
Cell_0004	TFEB_TR	Glucose 17 mM + Glutamine 2.500000e-01 mM + EAA 1.000000e-01 X	1.23839	2.14014	1.27538	0.850474	1.94154	1.26896	0.669721	1.99405	1.58783	1.63628	2.1128	1.6843	2.09052	1.03832	0.771029	1.21322	1.2359	1.32451	1.34357	1.02448	0.897723	1.19027	1.04727	1.33846	1.86813	0.794419	2.04144	1.04672	1.64839	1.03064	1.88112	1.37541	1.96405	2.13446	1.27168	1.715	1.44618	1.31263	1.29152	1.90025	1.54292	1.04889	1.49589	1.58027	1.69975	1.31769	2.27596
Cell_0004	FOXO_TR	Glucose 17 mM + Glutamine 2.500000e-01 mM + EAA 1.000000e-01 X	1.91325	1.52454	1.29579	1.3017	1.18154	1.28595	1.11287	1.04402	1.74166	1.88687	1.33593	1.68886	2.33233	2.5635	1.38881	1.54741	1.53364	1.42732	1.06509	1.24815	2.39883	1.21666	1.04738	2.2203	1.81496	1.182	1.34955	1.26382	1.35882	1.19435	1.17069	2.66445	1.41902	1.2633	2.01299	1.2791	1.56383	1.464	1.46982	1.15012	2.05893	1.12352	1.69237	1.74136	1.41267	2.20823	1.52835
Cell_0004	AMPKARt2	Glucose 17 mM + Glutamine 2.500000e-01 mM + EAA 1.000000e-01 X	0.573194	0.516068	0.622924	0.758647	0.558245	0.617662	0.660721	0.530958	0.519085	0.616148	0.541375	0.526956	0.507809	0.64437	0.599571	0.551372	0.481967	0.675498	0.410299	0.491053	0.588919	0.664648	0.668304	0.605767	0.596721	0.543401	0.396802	0.615413	0.614404	0.692508	0.526515	0.410417	0.551814	0.524506	0.682319	0.680395	0.692264	0.632155	0.686249	0.603583	0.683143	0.552932	0.684147	0.422977	0.547972	0.546784	0.539943
Cell_0005	TFEB_TR	Glucose 17 mM + Glutamine 2.500000e-01 mM + EAA 1.000000e-01 X	0.98441	2.25148	1.29168	0.84258	1.77881	1.24603	0.671468	2.17021	1.58999	1.86524	2.08153	1.73252	1.98897	1.40014	0.740996	1.17508	1.34487	1.56152	1.22854	0.991734	0.87835	1.33791	1.20175	1.39138	1.8921	0.830758	2.14854	1.08984	0.938602	1.24591	1.72634	1.45544	2.30995	2.07237	1.38382	1.84075	1.41017	1.4407	1.33913	1.91427	1.55979	1.08164	1.22881	1.66985	1.68616	1.18235	2.25055
Cell_0005	FOXO_TR	Glucose 17 mM + Glutamine 2.500000e-01 mM + EAA 1.000000e-01 X	1.96572	1.49961	1.3311	1.40595	1.18467	1.27414	1.11404	1.04717	1.72884	1.7734	1.33373	1.71457	2.42802	2.51646	1.52524	1.54087	1.50047	1.42463	1.04962	1.21735	2.38869	1.21691	1.06818	2.09802	1.72064	1.21313	1.28233	1.31104	1.54832	1.17034	1.29082	2.71794	1.42919	1.27869	2.01884	1.28018	1.53011	1.47443	1.43642	1.14579	2.08984	1.14835	1.62346	1.72723	1.40164	2.16847	1.48457
Cell_0005	AMPKARt2	Glucose 17 mM + Glutamine 2.500000e-01 mM + EAA 1.000000e-01 X	0.588793	0.515712	0.622939	0.748608	0.563569	0.611725	0.663844	0.522541	0.535705	0.608036	0.548823	0.515907	0.529292	0.651996	0.602723	0.532674	0.475777	0.673967	0.400814	0.499434	0.602696	0.662269	0.675426	0.57851	0.61045	0.546227	0.409565	0.611263	0.552624	0.692647	0.521374	0.405474	0.559516	0.523277	0.684003	0.684696	0.693567	0.645833	0.69482	0.602586	0.686678	0.555373	0.666315	0.415838	0.541937	0.558846	0.547
Cell_0006	TFEB_TR	Glucose 17 mM + Glutamine 2.500000e-01 mM + EAA 1.000000e-01 X	0.920686	2.05736	1.32482	0.869135	1.58817	1.27709	0.634239	2.38847	1.47288	1.93847	2.03338	1.44442	1.66109	1.58883	0.805533	1.24119	1.39368	1.44357	1.15726	0.998783	0.849299	1.31517	1.30639	1.39879	1.95378	0.821366	2.33577	1.11756	1.01615	1.75866	1.71979	1.60512	2.29764	1.97315	1.63154	1.76798	1.45865	1.39614	1.19891	1.84858	2.11933	0.984486	1.07536	1.94205	1.75818	1.22958	2.32661
Cell_0006	FOXO_TR	Glucose 17 mM + Glutamine 2.500000e-01 mM + EAA 1.000000e-01 X	1.91107	1.44786	1.35365	1.4441	1.16076	1.28862	1.10226	1.02569	1.6501	1.62545	1.29027	1.73823	2.32437	2.44801	1.67117	1.62258	1.50206	1.38526	1.0606	1.23493	2.39626	1.15253	1.08943	2.0616	1.70428	1.15952	1.20087	1.30928	1.57808	1.13752	1.32896	2.64786	1.48737	1.25518	2.06401	1.23439	1.54009	1.49247	1.40496	1.12126	2.04693	1.17863	1.66198	1.65816	1.44409	2.20881	1.45549
Cell_0006	AMPKARt2	Glucose 17 mM + Glutamine 2.500000e-01 mM + EAA 1.000000e-01 X	0.578824	0.516137	0.625371	0.763287	0.566446	0.605488	0.661861	0.504208	0.533044	0.608887	0.553889	0.538673	0.524958	0.652882	0.610764	0.528622	0.478027	0.673757	0.410036	0.491334	0.617666	0.671407	0.688939	0.585421	0.627296	0.554282	0.407924	0.612236	0.540263	0.680487	0.512966	0.395347	0.554162	0.52451	0.68188	0.67888	0.685901	0.60923	0.696831	0.593179	0.68182	0.569053	0.669535	0.402068	0.545075	0.557759	0.548332
Cell_0007	TFEB_TR	Glucose 17 mM + Glutamine 2.500000e-01 mM + EAA 1.000000e-01 X	1.14942	2.10225	1.33408	0.896306	1.56662	1.26987	0.627259	2.60726	1.54722	1.99482	2.01986	1.62558	1.67626	1.49188	0.866381	1.26997	1.1933	1.22535	1.17315	1.08557	0.948026	1.27725	1.305	1.26365	1.99433	0.770648	2.55732	1.10624	1.06545	1.89511	1.86838	1.51506	2.23988	1.88733	1.6275	1.84197	1.40447	1.1454	1.11506	1.7651	2.78859	0.937449	1.1358	2.02061	1.93881	1.29497	2.25483
Cell_0007	FOXO_TR	Glucose 17 mM + Glutamine 2.500000e-01 mM + EAA 1.000000e-01 X	1.76698	1.41766	1.33458	1.30704	1.11362	1.28784	1.09174	1.08127	1.68074	1.51567	1.25672	1.646	2.06488	2.42397	1.69262	1.73778	1.51031	1.42236	1.05963	1.29665	2.55107	1.15323	1.13756	2.00481	1.76854	1.0822	1.1722	1.26326	1.56471	1.12907	1.23712	2.41372	1.48775	1.20008	1.95177	1.26346	1.51317	1.59576	1.43504	1.12516	2.02716	1.20963	1.75547	1.55966	1.43236	2.31085	1.41445
Cell_0007	AMPKARt2	Glucose 17 mM + Glutamine 2.500000e-01 mM + EAA 1.000000e-01 X	0.5685	0.520326	0.611176	0.775101	0.56574	0.604273	0.631674	0.515795	0.526087	0.635136	0.556451	0.616718	0.502434	0.655586	0.617034	0.550782	0.488408	0.677976	0.433691	0.486724	0.618162	0.680653	0.688457	0.594711	0.637154	0.552368	0.392691	0.607931	0.552695	0.679448	0.522873	0.394808	0.543211	0.522139	0.684369	0.67826	0.690044	0.573643	0.698901	0.583845	0.676888	0.584573	0.611794	0.413661	0.54026	0.547096	0.540694
Cell_0008	TFEB_TR	Glucose 17 mM + Glutamine 2.500000e-01 mM + EAA 1.000000e-01 X	1.23784	2.2616	1.31125	0.846418	1.5966	1.2344	0.767398	2.82684	1.63216	1.9649	1.90144	1.49693	1.82625	1.40989	0.799228	1.18071	1.09829	1.23667	1.24539	1.10467	1.10775	1.11483	1.29125	1.17658	2.05852	0.784101	2.57145	1.05823	1.01352	1.51554	1.88907	1.29877	2.3304	1.83007	1.38897	1.96298	1.35073	1.10756	1.23053	1.74257	2.30231	1.17862	1.08923	1.84437	1.88835	1.2175	2.15325
Cell_0008	FOXO_TR	Glucose 17 mM + Glutamine 2.500000e-01 mM + EAA 1.000000e-01 X	1.71683	1.41366	1.30495	1.26179	1.13787	1.26607	1.12376	1.2131	1.75791	1.43601	1.2323	1.61522	1.98392	2.51662	1.64943	1.71839	1.54575	1.50009	1.02829	1.29355	2.72429	1.20401	1.14432	1.85507	1.77831	1.12822	1.1663	1.22063	1.51036	1.1495	1.25715	2.25126	1.43092	1.16136	1.8795	1.30177	1.43372	1.64008	1.4815	1.13216	1.90914	1.2311	1.6382	1.51374	1.38194	2.3193	1.38077
Cell_0008	AMPKARt2	Glucose 17 mM + Glutamine 2.500000e-01 mM + EAA 1.000000e-01 X	0.574544	0.516711	0.600974	0.725737	0.556848	0.609785	0.601448	0.525486	0.534935	0.662501	0.556042	0.625334	0.505626	0.656919	0.606456	0.561595	0.483649	0.68598	0.446318	0.500365	0.595675	0.681238	0.681437	0.582163	0.650146	0.548493	0.397205	0.595189	0.565072	0.693099	0.527198	0.400421	0.535683	0.519568	0.695819	0.683649	0.695158	0.568833	0.693548	0.597981	0.689914	0.580319	0.623056	0.428234	0.53881	0.551413	0.543648
Cell_0009	TFEB_TR	Glucose 17 mM + Glutamine 2.500000e-01 mM + EAA 1.000000e-01 X	1.0707	2.06731	1.30722	0.834895	1.57095	1.22177	0.97039	3.0981	1.5847	1.96666	1.84826	1.29705	1.63689	1.38484	0.780389	1.17664	1.22462	1.35981	1.23006	0.993089	1.11485	0.992149	1.30151	1.21941	2.06912	1.3036	2.5288	1.02627	0.932013	1.12265	1.793	1.31477	2.1372	1.78385	1.33919	1.7259	1.35114	1.28519	1.3361	1.76909	1.39526	1.40999	1.18187	1.78329	1.70274	1.32005	2.14203
Cell_0009	FOXO_TR	Glucose 17 mM + Glutamine 2.500000e-01 mM + EAA 1.000000e-01 X	1.76253	1.41923	1.31349	1.37375	1.15679	1.24165	1.172	1.26846	1.76177	1.40615	1.21604	1.61128	2.00883	2.603	1.62084	1.65397	1.61747	1.50617	1.03554	1.21176	2.6834	1.25454	1.07983	1.85057	1.723	1.32113	1.17177	1.18117	1.45508	1.16531	1.32999	2.2603	1.42611	1.1417	2.03014	1.24427	1.3999	1.52424	1.43785	1.14974	1.77281	1.23208	1.73538	1.51884	1.42012	2.27691	1.36913
Cell_0009	AMPKARt2	Glucose 17 mM + Glutamine 2.500000e-01 mM + EAA 1.000000e-01 X	0.577501	0.5175	0.604872	0.670116	0.563361	0.610469	0.596218	0.513607	0.537443	0.670377	0.549882	0.652711	0.53374	0.639848	0.605943	0.558369	0.479183	0.693298	0.456358	0.502773	0.565485	0.678661	0.684071	0.58059	0.649887	0.51273	0.407473	0.589832	0.56793	0.696505	0.521336	0.400867	0.532759	0.525767	0.692729	0.690345	0.695207	0.55316	0.694947	0.615311	0.695031	0.578537	0.627843	0.430974	0.539656	0.553373	0.557296
Cell_0010	TFEB_TR	Glucose 17 mM + Glutamine 2.500000e-01 mM + EAA 1.000000e-01 X	0.98273	1.72667	1.32905	0.929279	1.68657	1.20637	1.144	3.36833	1.68524	2.08647	1.91069	1.37703	1.45735	1.36022	0.813089	1.20432	1.30124	1.56225	1.27911	0.931697	1.32319	1.16026	1.43959	1.23502	1.88127	1.36856	2.62529	1.05153	0.941948	1.15947	1.73435	1.37353	1.79553	1.81109	1.68173	1.66691	1.28428	1.30875	1.30896	1.81682	1.48846	1.48094	1.25227	1.86017	1.65404	1.50164	2.17241
Cell_0010	FOXO_TR	Glucose 17 mM + Glutamine 2.500000e-01 mM + EAA 1.000000e-01 X	1.75936	1.43642	1.34716	1.4031	1.09912	1.23301	1.20555	1.24211	1.75523	1.41585	1.23048	1.72708	1.91511	2.51645	1.64225	1.64226	1.67937	1.5048	1.08356	1.17737	2.54751	1.25213	1.08501	1.95287	1.68121	1.39345	1.22734	1.1393	1.43194	1.15585	1.24412	2.36624	1.43768	1.14567	2.10386	1.23588	1.39313	1.38779	1.40926	1.20276	1.8017	1.22532	1.78986	1.51825	1.52056	2.29613	1.36587
Cell_0010	AMPKARt2	Glucose 17 mM + Glutamine 2.500000e-01 mM + EAA 1.000000e-01 X	0.578402	0.538825	0.605973	0.687416	0.578968	0.613203	0.596929	0.517963	0.532405	0.685748	0.550047	0.665941	0.550678	0.624864	0.623122	0.562484	0.503378	0.681637	0.462691	0.495444	0.554644	0.673872	0.685266	0.582087	0.633827	0.533698	0.404039	0.599073	0.566931	0.693451	0.529632	0.402066	0.543536	0.533224	0.678771	0.701494	0.69987	0.549125	0.706804	0.607614	0.68617	0.587946	0.621776	0.438076	0.532058	0.544582	0.564025
Cell_0011	TFEB_TR	Glucose 17 mM + Glutamine 2.500000e-01 mM + EAA 1.000000e-01 X	1.05849	1.81777	1.33497	1.052	1.73253	1.21168	1.33317	3.28625	0.724961	1.96295	1.90752	1.44291	1.65865	1.2973	0.759214	1.15524	1.28136	2.00657	1.4376	0.958372	2.10913	1.11832	1.5755	1.21431	1.88377	1.4923	2.74334	1.01245	1.01103	1.32788	1.64747	1.27779	1.79057	1.89815	1.82213	2.20166	1.22549	1.14856	1.33173	0.841577	1.85035	1.4038	1.16039	1.8437	1.74531	1.41366	2.29456
Cell_0011	FOXO_TR	Glucose 17 mM + Glutamine 2.500000e-01 mM + EAA 1.000000e-01 X	1.73874	1.4691	1.35887	1.35582	1.08623	1.28171	1.21916	1.21759	1.16972	1.40786	1.26263	1.84982	1.75113	2.4633	1.66014	1.59243	1.68038	1.53206	1.06831	1.19488	2.58208	1.1704	1.16665	1.94768	1.69517	1.44342	1.26955	1.10841	1.42958	1.1342	1.17225	2.42813	1.4162	1.16764	1.94045	1.36135	1.38553	1.30117	1.53676	1.58155	1.8178	1.20518	1.69335	1.53176	1.54487	2.29544	1.36204
Cell_0011	AMPKARt2	Glucose 17 mM + Glutamine 2.500000e-01 mM + EAA 1.000000e-01 X	0.580426	0.559837	0.607587	0.725832	0.56754	0.627905	0.600237	0.53147	0.571346	0.699024	0.552344	0.648256	0.551998	0.634391	0.63304	0.568202	0.51468	0.645684	0.450987	0.506167	0.570417	0.671703	0.678244	0.572644	0.637196	0.530676	0.404287	0.60813	0.559099	0.700095	0.531606	0.403236	0.569021	0.531831	0.676362	0.705021	0.699064	0.582269	0.701945	0.546404	0.687826	0.581312	0.624839	0.447719	0.532546	0.544594	0.560704
Cell_0012	TFEB_TR	Glucose 17 mM + Glutamine 2.500000e-01 mM + EAA 1.000000e-01 X	1.0788	2.23358	1.32276	1.12916	1.69943	1.24413	1.39643	3.0755	0.9338	1.66884	1.87613	1.2866	1.82075	1.24333	0.767937	1.1464	1.2221	2.18908	1.41215	0.965067	2.55187	0.814495	1.47159	1.18505	2.37935	1.51458	2.82265	0.910082	1.03193	1.32188	1.52173	1.38334	1.91677	1.90367	1.46882	2.47807	1.21122	1.10819	1.5964	0.915702	1.7594	1.06663	1.07034	1.79211	1.90173	1.21715	2.37078
Cell_0012	FOXO_TR	Glucose 17 mM + Glutamine 2.500000e-01 mM + EAA 1.000000e-01 X	1.82271	1.51153	1.35121	1.33857	1.13407	1.33465	1.19061	1.18171	1.18499	1.37283	1.28456	1.8405	1.63911	2.60017	1.60497	1.50783	1.59933	1.48039	1.03305	1.20065	2.65301	1.11919	1.15807	1.91129	1.76507	1.47513	1.25064	1.08711	1.40619	1.12607	1.30104	2.34591	1.43824	1.19328	1.79469	1.42975	1.37472	1.23817	1.66671	1.53869	1.72664	1.19793	1.68129	1.56861	1.49223	2.22669	1.3438
Cell_0012	AMPKARt2	Glucose 17 mM + Glutamine 2.500000e-01 mM + EAA 1.000000e-01 X	0.577831	0.562133	0.613937	0.723603	0.549553	0.630031	0.630161	0.52771	0.55272	0.683645	0.547293	0.632792	0.557162	0.642719	0.640664	0.562022	0.489252	0.609677	0.44092	0.511271	0.584554	0.679444	0.687334	0.572435	0.647707	0.51884	0.410058	0.607643	0.565513	0.705333	0.522984	0.405631	0.579624	0.536434	0.681105	0.697866	0.698814	0.59725	0.696093	0.566094	0.692075	0.564368	0.635013	0.447364	0.542903	0.547277	0.559847
Cell_0013	TFEB_TR	Glucose 17 mM + Glutamine 2.500000e-01 mM + EAA 1.000000e-01 X	1.07663	2.0416	1.3105	1.1405	1.91782	1.21156	1.24472	3.4569	0.994151	1.66245	1.87671	1.42566	1.54977	1.53491	0.851032	1.17869	1.10323	1.72831	1.28299	0.971499	2.03966	0.9048	0.614632	1.12789	2.63091	1.35634	2.77949	0.95501	1.00421	1.3143	1.46942	1.71181	1.80868	1.863	1.50012	2.16488	1.17341	1.21945	1.84855	0.898963	1.85036	0.94627	1.15811	1.74483	1.92982	1.1998	2.25711
Cell_0013	FOXO_TR	Glucose 17 mM + Glutamine 2.500000e-01 mM + EAA 1.000000e-01 X	1.94858	1.53221	1.35394	1.29536	1.12888	1.29821	1.12479	1.15117	1.25767	1.32577	1.29412	1.82199	1.59461	2.64785	1.60082	1.48233	1.5434	1.38135	1.09637	1.20921	2.54761	1.17932	1.20892	1.95426	1.7744	1.48021	1.21559	1.06465	1.37024	1.13401	1.4221	2.22066	1.49095	1.22926	1.75192	1.38355	1.3643	1.24826	1.64671	1.59692	1.73366	1.23907	1.75797	1.56116	1.48348	2.19259	1.33637
Cell_0013	AMPKARt2	Glucose 17 mM + Glutamine 2.500000e-01 mM + EAA 1.000000e-01 X	0.578457	0.557227	0.614848	0.710127	0.556167	0.617677	0.66101	0.52529	0.562571	0.672523	0.546973	0.634392	0.563468	0.6417	0.651445	0.557287	0.490406	0.570676	0.445815	0.495997	0.575867	0.685912	0.510359	0.574218	0.634744	0.524427	0.407697	0.604584	0.584633	0.702094	0.535198	0.424047	0.568356	0.548205	0.68309	0.702664	0.708424	0.576531	0.715346	0.560075	0.688461	0.564633	0.627474	0.449975	0.543297	0.541479	0.569985
Cell_0014	TFEB_TR	Glucose 17 mM + Glutamine 2.500000e-01 mM + EAA 1.000000e-01 X	1.14901	1.59525	1.29802	1.11086	1.90046	1.15424	1.18608	4.04911	0.836079	1.75984	1.82207	1.63327	1.27921	1.80869	0.809984	1.18404	1.10575	2.01105	1.42552	0.980146	1.9049	1.07572	0.639853	1.11177	2.09251	1.23273	2.48174	1.06773	1.01679	1.13702	1.47848	1.84049	1.80863	1.88935	2.00368	2.00268	1.2063	1.28813	1.75048	0.870296	1.9365	1.25418	1.26754	1.665	1.78522	1.38256	2.13564
Cell_0014	FOXO_TR	Glucose 17 mM + Glutamine 2.500000e-01 mM + EAA 1.000000e-01 X	1.99102	1.50793	1.35833	1.2589	1.12677	1.27191	1.07178	1.14698	1.32971	1.32278	1.29168	1.8578	1.57029	2.52212	1.72473	1.50444	1.59144	1.35651	1.17017	1.19747	2.42659	1.27656	1.20525	1.97696	1.65578	1.4463	1.17507	1.04096	1.37719	1.12694	1.34094	2.23384	1.50252	1.25155	1.69063	1.379	1.46903	1.30109	1.62374	1.6211	1.81062	1.28965	1.77538	1.50203	1.53367	2.25398	1.35891
Cell_0014	AMPKARt2	Glucose 17 mM + Glutamine 2.500000e-01 mM + EAA 1.000000e-01 X	0.576095	0.558283	0.617895	0.711422	0.566951	0.625608	0.64936	0.532788	0.569176	0.679936	0.548606	0.63589	0.563512	0.645749	0.649382	0.576647	0.519624	0.512139	0.446893	0.495172	0.564117	0.686957	0.523146	0.567423	0.629178	0.541986	0.412794	0.612217	0.578554	0.700834	0.547661	0.436646	0.569443	0.545403	0.682799	0.722872	0.705438	0.566501	0.720444	0.557983	0.686551	0.572745	0.622058	0.461346	0.531686	0.535683	0.585688
Cell_0015	TFEB_TR	Glucose 17 mM + Glutamine 2.500000e-01 mM + EAA 1.000000e-01 X	1.18881	2.35926	1.29682	1.09958	1.58198	1.28928	1.28202	3.91927	0.758792	1.72796	1.77118	1.48471	1.59246	1.36539	0.785757	1.181	1.23366	3.59367	1.76671	0.94363	2.59996	0.880635	0.634065	1.11514	1.57261	1.21353	2.17982	0.998565	1.02703	0.964278	1.53003	1.73154	2.57335	1.91403	1.86214	2.00843	1.1559	1.35613	1.52615	0.872172	1.64215	1.24876	1.1748	1.71728	1.75698	1.54646	2.03295
Cell_0015	FOXO_TR	Glucose 17 mM + Glutamine 2.500000e-01 mM + EAA 1.000000e-01 X	1.95777	1.5225	1.3696	1.28889	1.19367	1.3806	1.05408	1.10477	1.3346	1.40557	1.27778	1.84355	1.53034	2.52019	1.75815	1.50236	1.59867	1.38228	1.16009	1.1642	2.43156	1.30679	1.17622	1.93024	1.59022	1.38647	1.11768	1.01445	1.40329	1.11721	1.19188	2.31665	1.55306	1.24136	1.60462	1.41968	1.2383	1.27832	1.66583	1.57828	1.79471	1.31849	1.79142	1.46112	1.54797	2.39704	1.34158
Cell_0015	AMPKARt2	Glucose 17 mM + Glutamine 2.500000e-01 mM + EAA 1.000000e-01 X	0.552448	0.564705	0.625322	0.71366	0.554357	0.512846	0.628826	0.540989	0.548866	0.677685	0.540105	0.635131	0.56589	0.641571	0.641321	0.600451	0.509774	0.476852	0.441214	0.504469	0.566285	0.686275	0.540601	0.566525	0.644445	0.544209	0.440424	0.630341	0.56802	0.702358	0.539185	0.419934	0.581793	0.541489	0.682	0.734597	0.505299	0.567586	0.692845	0.569298	0.683684	0.569728	0.634615	0.466552	0.5246	0.52329	0.593738
Cell_0016	TFEB_TR	Glucose 17 mM + Glutamine 2.500000e-01 mM + EAA 1.000000e-01 X	1.18742	3.38267	1.30812	1.14996	1.85073	1.23105	1.21833	3.28619	0.994874	1.75452	1.80431	1.42691	2.04822	1.03527	0.875185	1.14933	1.16003	4.33974	1.83491	0.928112	2.6453	0.909286	0.663894	1.0668	1.82021	1.20388	2.137	0.866571	0.979715	1.36835	1.61416	1.65016	3.63483	1.92025	1.28806	1.80043	1.18449	1.49906	1.39926	0.857878	1.75963	1.01567	1.06529	1.79478	1.81853	1.44765	1.90959
Cell_0016	FOXO_TR	Glucose 17 mM + Glutamine 2.500000e-01 mM + EAA 1.000000e-01 X	1.91712	1.63638	1.4098	1.303	1.20055	1.37241	1.05571	1.05173	1.30678	1.45159	1.2791	1.79518	1.50005	2.61868	1.61457	1.46736	1.52531	1.39518	1.1582	1.19735	2.44333	1.23359	1.1594	1.89355	1.66559	1.33699	1.06329	0.995264	1.39451	1.14053	1.12913	2.26209	1.71359	1.24805	1.51821	1.41375	1.2548	1.21075	1.6377	1.61312	1.74932	1.33924	1.83329	1.43323	1.54158	2.52059	1.29658
Cell_0016	AMPKARt2	Glucose 17 mM + Glutamine 2.500000e-01 mM + EAA 1.000000e-01 X	0.525234	0.571107	0.618078	0.707629	0.527497	0.502382	0.639898	0.547577	0.53477	0.674431	0.530744	0.633861	0.570159	0.634495	0.630374	0.591129	0.492487	0.499261	0.446443	0.503288	0.574645	0.67095	0.555176	0.568859	0.64913	0.536507	0.472264	0.637535	0.58574	0.70419	0.535358	0.411711	0.580912	0.552025	0.685145	0.729079	0.490246	0.555196	0.682851	0.571258	0.681866	0.569598	0.634359	0.478564	0.534554	0.494066	0.593231
Cell_0017	TFEB_TR	Glucose 17 mM + Glutamine 2.500000e-01 mM + EAA 1.000000e-01 X	1.176	3.05011	1.30521	1.18831	2.2917	1.19809	1.10014	2.74371	1.26701	1.73265	1.84484	1.40935	1.88031	1.6689	0.843834	1.1655	0.9824	3.83988	1.59543	1.08703	2.21217	1.15267	0.709988	1.04252	2.26722	1.3795	2.15178	0.905489	1.00456	1.53953	1.59088	1.74619	3.69415	1.95758	1.30916	1.83062	1.22491	1.44293	1.27165	0.849367	2.21681	1.21909	1.1694	1.60472	1.71526	1.22459	2.05407
Cell_0017	FOXO_TR	Glucose 17 mM + Glutamine 2.500000e-01 mM + EAA 1.000000e-01 X	1.91219	1.73164	1.42015	1.27787	1.13111	1.35485	1.05755	1.06967	1.31611	1.3838	1.3199	1.77381	1.48749	2.55146	1.50153	1.49891	1.53598	1.37757	1.18704	2.30094	2.3884	1.12385	1.16095	1.85093	1.73029	1.34323	1.02905	1.01515	1.41528	1.1354	1.10858	2.12949	1.88954	1.28545	1.47162	1.40071	1.24665	1.20134	1.60469	1.67995	1.72753	1.35	1.83927	1.37967	1.58793	2.49288	1.33705
Cell_0017	AMPKARt2	Glucose 17 mM + Glutamine 2.500000e-01 mM + EAA 1.000000e-01 X	0.518779	0.579755	0.607882	0.701774	0.535177	0.512071	0.653581	0.543059	0.536835	0.684143	0.529538	0.626187	0.571616	0.646146	0.60838	0.572421	0.522312	0.521598	0.459924	0.649422	0.57269	0.653638	0.55999	0.572082	0.641091	0.54043	0.491983	0.63088	0.585182	0.710998	0.539652	0.424357	0.58129	0.551767	0.686614	0.72141	0.525949	0.548918	0.703816	0.562885	0.691214	0.581563	0.629272	0.506206	0.542922	0.46453	0.59055
Cell_0018	TFEB_TR	Glucose 17 mM + Glutamine 2.500000e-01 mM + EAA 1.000000e-01 X	1.14501	2.57824	1.29967	1.11826	2.06857	1.15882	1.21049	2.40119	1.23832	1.62549	1.88734	1.21825	1.52778	2.182	0.798059	1.32838	1.00351	3.85505	1.53564	1.08852	2.70406	1.03272	0.676255	1.02793	2.20891	1.71716	2.03888	0.992997	1.07862	1.2084	1.49082	1.90757	3.14456	1.92808	1.58779	2.29455	1.21698	1.15955	1.27415	0.880456	2.13456	1.39855	1.25574	1.4653	1.54756	1.20539	2.46696
Cell_0018	FOXO_TR	Glucose 17 mM + Glutamine 2.500000e-01 mM + EAA 1.000000e-01 X	1.92695	1.72707	1.37615	1.25387	1.1524	1.3236	1.04649	1.09723	1.39738	1.34022	1.36716	1.77193	1.44506	2.42645	1.49867	1.63697	1.58937	1.31288	1.16449	2.28137	2.31518	1.10073	1.14072	1.74189	1.76133	1.37901	1.00057	1.04408	1.49845	1.08364	1.09389	2.12298	1.97809	1.28532	1.50565	1.4104	1.27498	1.2507	1.70965	1.6385	1.67772	1.36974	1.88081	1.35783	1.62645	2.40393	1.41831
Cell_0018	AMPKARt2	Glucose 17 mM + Glutamine 2.500000e-01 mM + EAA 1.000000e-01 X	0.515682	0.593012	0.615354	0.705334	0.582435	0.525934	0.651795	0.536199	0.532322	0.686802	0.536279	0.617224	0.576345	0.659675	0.605801	0.583179	0.546037	0.503522	0.46255	0.650574	0.547472	0.661371	0.56957	0.581901	0.626214	0.539394	0.501939	0.630613	0.543314	0.717675	0.549023	0.414916	0.585331	0.545698	0.677478	0.71659	0.549755	0.559735	0.712795	0.555303	0.701038	0.579776	0.643861	0.510253	0.533211	0.452096	0.577505
Cell_0019	TFEB_TR	Glucose 17 mM + Glutamine 2.500000e-01 mM + EAA 1.000000e-01 X	1.20615	2.77752	0.986117	1.10195	1.86547	1.16607	1.32701	2.64586	1.0242	1.70622	1.94189	1.38079	1.58242	1.76908	0.969002	1.48755	1.08872	3.88958	1.64868	1.1684	3.35009	0.935462	0.61572	0.982825	2.01082	1.76191	1.9278	0.936228	1.07066	1.9346	1.58143	1.86376	3.27406	1.24553	1.55318	2.46212	1.15712	1.24833	1.38274	0.90622	2.21806	1.21448	1.20906	1.64858	1.43035	1.33036	2.76433
Cell_0019	FOXO_TR	Glucose 17 mM + Glutamine 2.500000e-01 mM + EAA 1.000000e-01 X	1.90678	1.69855	0.991643	1.209	1.25102	1.34412	1.03479	1.08566	1.48066	1.35401	1.37626	1.78523	1.36741	2.39436	1.52359	1.76452	1.56678	1.25311	1.108	2.2214	2.24822	1.19129	1.10884	1.6561	1.80466	1.37541	0.94967	1.02541	1.52092	1.11158	1.12154	2.16695	1.95057	1.46578	1.5053	1.37938	1.30164	1.31229	1.82867	1.59613	1.65998	1.42136	1.94945	1.38296	1.61228	2.42874	1.4374
Cell_0019	AMPKARt2	Glucose 17 mM + Glutamine 2.500000e-01 mM + EAA 1.000000e-01 X	0.500227	0.598451	0.506632	0.711963	0.593988	0.522812	0.654693	0.544033	0.540789	0.680997	0.54247	0.598333	0.578041	0.661691	0.635706	0.59908	0.53287	0.513981	0.461354	0.651831	0.530251	0.67305	0.575492	0.579791	0.614332	0.540547	0.49942	0.634321	0.508759	0.717084	0.565719	0.39038	0.575657	0.623772	0.670345	0.705797	0.538536	0.566323	0.702695	0.557336	0.701112	0.5604	0.63349	0.490205	0.530377	0.450316	0.561241
Cell_0020	TFEB_TR	Glucose 17 mM + Glutamine 2.500000e-01 mM + EAA 1.000000e-01 X	1.33278	2.57439	0.977691	1.34468	2.08443	1.24005	1.2115	3.35719	0.95062	1.77397	1.92142	1.60279	1.55415	1.30976	1.08775	1.55157	1.14869	3.14893	1.56317	1.15642	2.99795	1.11851	0.624448	1.08406	2.15525	1.53959	1.92758	0.928566	1.14841	3.1866	1.78575	1.69358	3.51143	1.31765	1.48085	2.09292	1.12581	1.61232	1.30502	0.891287	2.9224	1.22919	1.24911	1.712	1.37192	1.33747	2.83867
Cell_0020	FOXO_TR	Glucose 17 mM + Glutamine 2.500000e-01 mM + EAA 1.000000e-01 X	1.87763	1.68028	0.992531	1.18428	1.27194	1.43197	1.03391	1.1052	1.4449	1.3275	1.37307	1.76064	1.3193	2.29607	1.51751	1.83325	1.59043	1.26126	1.06399	2.17214	2.16513	1.25619	1.11085	1.68025	1.75979	1.40184	0.908705	1.01955	1.4618	1.21977	1.16606	2.03822	1.83617	1.46854	1.42868	1.32762	1.25284	1.33383	1.82414	1.65327	1.71387	1.46468	1.92047	1.38003	1.59854	2.46888	1.43296
Cell_0020	AMPKARt2	Glucose 17 mM + Glutamine 2.500000e-01 mM + EAA 1.000000e-01 X	0.490371	0.593298	0.517887	0.711814	0.563059	0.513434	0.662	0.548422	0.56806	0.684579	0.534883	0.566518	0.572011	0.662607	0.653234	0.595807	0.538396	0.595977	0.473126	0.658804	0.552687	0.671541	0.562338	0.569253	0.630672	0.573696	0.488793	0.631537	0.497104	0.716861	0.559618	0.389111	0.574039	0.627923	0.674979	0.700113	0.534804	0.570714	0.704055	0.571828	0.70018	0.558487	0.576108	0.494264	0.538682	0.440539	0.567656
Cell_0021	TFEB_TR	Glucose 17 mM + Glutamine 2.500000e-01 mM + EAA 1.000000e-01 X	1.29609	2.18383	0.95409	1.56051	2.13184	1.25939	1.09838	3.36343	0.986554	1.69291	1.8841	1.34902	1.45932	1.43264	1.01706	1.62832	0.924657	2.68943	1.43566	1.04029	2.58574	1.07074	0.634036	1.25598	2.25487	1.58253	1.9567	1.15353	1.34555	2.93808	1.682	1.68083	3.22393	1.22713	1.44438	1.77955	1.209	1.42827	1.25019	0.862947	2.8224	1.38532	1.32677	1.59044	1.45786	1.3136	2.76582
Cell_0021	FOXO_TR	Glucose 17 mM + Glutamine 2.500000e-01 mM + EAA 1.000000e-01 X	1.88743	1.64511	0.978562	1.24225	1.22092	1.4949	1.02013	1.14245	1.37891	1.33812	1.39082	1.68338	1.35808	2.20478	1.44392	1.85156	2.31653	1.27049	1.02548	2.14426	2.08491	1.20005	1.14003	1.72836	1.66506	1.53623	0.915955	1.06854	1.45373	1.27727	1.19991	1.82638	1.74711	1.43853	1.40851	1.3458	1.22578	1.29443	1.75304	1.66493	1.71103	1.474	1.90765	1.37732	1.578	2.37757	1.4269
Cell_0021	AMPKARt2	Glucose 17 mM + Glutamine 2.500000e-01 mM + EAA 1.000000e-01 X	0.49891	0.595815	0.520324	0.706561	0.564407	0.510142	0.667941	0.539814	0.568878	0.688959	0.523949	0.570094	0.57582	0.658852	0.645791	0.58464	0.648675	0.670659	0.481223	0.664583	0.570277	0.675497	0.567944	0.581987	0.643924	0.584315	0.491991	0.63154	0.489825	0.720038	0.536819	0.402333	0.584953	0.638015	0.679591	0.712719	0.529289	0.58279	0.717582	0.587711	0.703811	0.569045	0.530729	0.503912	0.539664	0.41716	0.581552
Cell_0022	TFEB_TR	Glucose 17 mM + Glutamine 2.500000e-01 mM + EAA 1.000000e-01 X	1.10864	2.37826	0.941992	1.39749	2.01313	1.21991	1.19879	2.76731	0.970663	1.82023	1.91453	1.32766	1.9135	1.63954	1.01256	1.67215	0.982143	2.4434	1.45566	1.00753	3.05518	0.877965	0.584901	1.19076	2.00811	1.85778	1.91006	1.28877	1.37276	1.90872	1.35894	1.7018	3.17829	1.16076	1.27061	1.78417	1.29573	1.12145	1.36284	0.848433	1.88051	1.23537	1.37329	1.67498	1.53122	1.38519	2.68648
Cell_0022	FOXO_TR	Glucose 17 mM + Glutamine 2.500000e-01 mM + EAA 1.000000e-01 X	1.86938	1.61205	0.96155	1.29306	1.18606	1.50902	1.0054	1.12552	1.43154	1.42405	1.39996	1.63408	1.4391	2.35971	1.36211	1.74773	2.29143	1.22115	1.00842	2.1109	2.0719	1.1824	1.13593	1.7073	1.68348	1.64478	0.903813	1.09211	1.4823	1.29258	1.22359	1.7778	1.75644	1.44114	1.42827	1.39582	1.28912	1.26079	1.69611	1.62406	1.68817	1.48083	2.04683	1.41319	1.55702	2.27085	1.39374
Cell_0022	AMPKARt2	Glucose 17 mM + Glutamine 2.500000e-01 mM + EAA 1.000000e-01 X	0.513924	0.602686	0.523442	0.708076	0.588124	0.511566	0.679265	0.537934	0.552276	0.681048	0.524363	0.619084	0.57912	0.648763	0.644245	0.569244	0.663174	0.681422	0.471449	0.667877	0.561634	0.679915	0.59241	0.597637	0.622049	0.535076	0.50511	0.63866	0.487127	0.722734	0.541682	0.409894	0.581792	0.640907	0.6812	0.721826	0.513578	0.589118	0.724762	0.596802	0.707604	0.554837	0.525636	0.481837	0.551467	0.39746	0.579533
Cell_0023	TFEB_TR	Glucose 17 mM + Glutamine 2.500000e-01 mM + EAA 1.000000e-01 X	1.0433	2.58315	0.967172	1.18123	2.10026	1.23392	1.34416	2.70916	1.03019	1.97758	1.92967	1.64794	2.25573	1.5093	1.04924	1.61365	1.01076	2.0676	1.49951	1.08832	3.73797	0.985244	0.560193	1.0704	1.86194	1.84504	1.85281	1.10336	1.33142	1.66501	0.675867	1.59818	3.28292	1.12255	1.22764	1.92832	1.20976	1.35919	1.2857	0.831317	1.50175	1.06735	1.46316	1.7995	1.45727	1.34842	2.75508
Cell_0023	FOXO_TR	Glucose 17 mM + Glutamine 2.500000e-01 mM + EAA 1.000000e-01 X	1.80742	1.57988	0.968274	1.28169	1.17986	1.52426	1.02869	1.09741	1.48273	1.41064	1.39174	1.58684	1.46009	2.49507	1.32791	1.60998	2.32779	1.17511	1.02734	2.12327	2.07207	1.30976	1.09054	1.6506	1.71267	1.66275	0.84684	1.09313	1.44578	1.31864	1.51909	1.78738	1.78164	1.48139	1.40212	1.38771	1.33125	1.29231	1.68217	1.67256	1.79317	1.50033	2.18836	1.42219	1.5639	2.23527	1.36772
Cell_0023	AMPKARt2	Glucose 17 mM + Glutamine 2.500000e-01 mM + EAA 1.000000e-01 X	0.51892	0.596429	0.525243	0.720694	0.583626	0.521586	0.682151	0.544476	0.553985	0.674961	0.52563	0.640376	0.558057	0.646387	0.6459	0.564919	0.668812	0.673329	0.459097	0.672621	0.571643	0.676424	0.585133	0.586955	0.614642	0.503659	0.504416	0.643366	0.487643	0.72971	0.69964	0.409093	0.582306	0.633239	0.689165	0.711657	0.521195	0.583916	0.73042	0.594422	0.707522	0.534139	0.528365	0.473536	0.571982	0.394724	0.582177
Cell_0024	TFEB_TR	Glucose 17 mM + Glutamine 2.500000e-01 mM + EAA 1.000000e-01 X	1.10656	2.27811	1.01689	1.2587	2.16605	1.24872	1.36878	2.82741	1.16002	1.85886	1.98207	1.51595	1.85652	1.43915	0.989076	1.55742	0.975895	2.32481	1.53154	1.12135	3.90968	1.25032	0.58843	1.1657	1.96262	1.74552	1.92891	0.887798	1.50887	1.8511	0.649386	1.49949	2.90331	1.08651	1.49068	2.06629	1.13727	1.38167	1.12922	0.811607	1.47887	1.13491	1.42493	1.78708	1.46063	1.3354	2.76575
Cell_0024	FOXO_TR	Glucose 17 mM + Glutamine 2.500000e-01 mM + EAA 1.000000e-01 X	1.8053	1.53256	0.982625	1.30373	1.19365	1.53986	1.05243	1.10081	1.47315	1.32122	1.39402	1.50942	1.43458	2.34714	1.25243	1.63528	2.35717	1.1634	1.04486	2.17104	1.98466	1.38809	1.09646	1.62618	1.59734	1.73611	0.845298	1.09877	1.40501	1.33299	1.54177	1.66221	1.74862	1.49005	1.37431	1.37276	1.29392	1.36412	1.67576	1.69706	1.82342	1.53168	2.2191	1.42296	1.5357	2.16494	1.35607
Cell_0024	AMPKARt2	Glucose 17 mM + Glutamine 2.500000e-01 mM + EAA 1.000000e-01 X	0.515232	0.590426	0.523192	0.724961	0.573937	0.52693	0.66596	0.551933	0.538765	0.676914	0.524464	0.610587	0.545114	0.65939	0.634982	0.581688	0.672003	0.670376	0.452838	0.669869	0.590434	0.678033	0.571723	0.580991	0.636428	0.512859	0.501917	0.638708	0.487663	0.734202	0.714526	0.400677	0.591577	0.626632	0.700525	0.703708	0.545057	0.575019	0.738513	0.57598	0.707521	0.540394	0.509304	0.504561	0.569211	0.400796	0.592138
Cell_0025	TFEB_TR	Glucose 17 mM + Glutamine 2.500000e-01 mM + EAA 1.000000e-01 X	1.0754	1.89743	1.03933	1.38443	1.97172	1.19227	1.34853	2.62796	1.15797	1.83545	2.12421	1.13372	1.58572	1.11192	0.929143	1.51413	0.959789	2.62993	1.42961	1.02469	3.74393	1.34468	0.621494	1.24058	1.8715	2.1306	2.13081	0.846067	1.66678	1.7694	0.682075	1.40892	2.41939	1.12855	1.60007	2.04213	1.2533	1.27929	1.21526	0.852274	1.64224	1.11101	1.36755	1.85948	1.28185	1.65446	2.61929
Cell_0025	FOXO_TR	Glucose 17 mM + Glutamine 2.500000e-01 mM + EAA 1.000000e-01 X	1.83721	1.52898	0.975218	1.35598	1.21124	1.5507	1.04517	1.09656	1.54482	1.35578	1.38978	1.49661	1.43894	1.47094	1.13802	1.73923	2.34355	1.15272	1.02126	2.16891	1.88448	1.33602	1.1863	1.63587	1.47579	1.84356	0.909876	1.04803	1.41993	1.35024	1.60355	1.58134	1.71532	1.46424	1.35104	1.40665	1.25474	1.39899	1.62195	1.61611	1.74762	1.57846	2.16407	1.4703	1.72099	2.07297	1.33436
Cell_0025	AMPKARt2	Glucose 17 mM + Glutamine 2.500000e-01 mM + EAA 1.000000e-01 X	0.515542	0.597543	0.519713	0.719263	0.581927	0.517166	0.655464	0.560647	0.50637	0.677262	0.526483	0.58587	0.560693	0.72099	0.632868	0.582754	0.679272	0.653361	0.45426	0.661749	0.588577	0.676798	0.576936	0.588038	0.641037	0.501767	0.513682	0.63396	0.494528	0.724969	0.70913	0.395467	0.58137	0.629046	0.705028	0.71253	0.55193	0.569782	0.73464	0.553514	0.717608	0.548857	0.469748	0.518632	0.605826	0.407311	0.589174
Cell_0026	TFEB_TR	Glucose 17 mM + Glutamine 2.500000e-01 mM + EAA 1.000000e-01 X	1.09802	1.877	1.01463	1.45396	1.88105	1.1935	1.3322	2.52348	1.04709	1.99333	2.12555	1.04605	1.79741	1.15293	0.903529	1.45659	1.04635	2.26462	1.17795	0.980697	3.18539	1.14826	0.677095	1.2133	1.68512	2.34756	2.32353	0.924487	1.58956	1.61784	0.63264	1.36294	2.28835	1.16635	1.40816	1.96655	1.34073	1.96691	1.27811	0.958797	2.60538	0.936635	1.59425	1.94684	1.24669	1.81252	2.58028
Cell_0026	FOXO_TR	Glucose 17 mM + Glutamine 2.500000e-01 mM + EAA 1.000000e-01 X	1.80895	1.57772	0.973027	1.36709	1.18595	1.59159	1.058	1.08847	1.62277	1.44366	1.37851	1.5118	1.44206	1.44622	1.11192	1.75	2.36264	1.13489	0.973263	2.17101	1.84749	1.31163	1.25874	1.65538	1.49407	1.81588	0.944934	1.04287	1.40972	1.37751	1.57844	1.65399	1.73727	1.44655	1.31813	1.42301	1.26682	1.3435	1.58754	1.62213	1.95916	1.6207	2.04173	1.52727	1.83572	2.05817	1.32308
Cell_0026	AMPKARt2	Glucose 17 mM + Glutamine 2.500000e-01 mM + EAA 1.000000e-01 X	0.519292	0.604436	0.509356	0.727394	0.592935	0.523828	0.663656	0.562386	0.521104	0.686787	0.525184	0.590758	0.566757	0.722617	0.647955	0.561419	0.679021	0.643658	0.4649	0.660416	0.595197	0.667141	0.553941	0.581702	0.633206	0.480213	0.51906	0.643367	0.508985	0.715024	0.699272	0.401198	0.578467	0.641113	0.702908	0.725067	0.544396	0.572866	0.720752	0.543156	0.736154	0.536783	0.447701	0.497376	0.618297	0.411569	0.582135
Cell_0027	TFEB_TR	Glucose 17 mM + Glutamine 2.500000e-01 mM + EAA 1.000000e-01 X	1.25972	1.92881	0.99667	1.52884	1.89674	1.31099	1.29652	2.21067	0.906901	2.07201	2.01229	1.23135	1.89889	1.18455	0.925101	1.48537	1.0979	2.12402	1.06522	1.09965	2.58479	0.785963	0.757674	1.32437	1.88776	1.73953	2.38551	0.585771	1.54078	1.76384	0.627586	1.52526	2.54764	1.19865	1.4713	2.12124	1.30702	2.29112	1.1476	1.0346	3.15824	0.95092	1.72448	1.92042	1.36852	1.49869	2.56308
Cell_0027	FOXO_TR	Glucose 17 mM + Glutamine 2.500000e-01 mM + EAA 1.000000e-01 X	1.78556	1.57258	0.987304	1.36956	1.11903	1.67454	1.09218	1.09097	1.60423	1.43868	1.41872	1.46285	1.40424	1.42558	1.15186	1.76039	2.37475	1.11517	0.953621	2.21402	1.80616	1.32331	1.27305	1.74157	1.58317	1.71601	0.945235	1.6929	1.34663	1.38314	1.49413	1.64915	1.79818	1.46499	1.32014	1.39642	1.28883	1.27172	1.64769	1.70368	2.20643	1.63238	1.96432	1.58855	1.84717	2.04097	1.33376
Cell_0027	AMPKARt2	Glucose 17 mM + Glutamine 2.500000e-01 mM + EAA 1.000000e-01 X	0.525183	0.606009	0.502311	0.733568	0.604224	0.546433	0.676445	0.554912	0.544309	0.703291	0.526403	0.605767	0.564032	0.714357	0.640907	0.558207	0.673088	0.660301	0.469349	0.661307	0.608982	0.66872	0.518654	0.586585	0.63485	0.486694	0.513249	0.566963	0.514991	0.712184	0.708461	0.412951	0.595593	0.648388	0.698886	0.723239	0.53394	0.577914	0.714691	0.547082	0.743591	0.523088	0.453347	0.480697	0.619135	0.401056	0.576222
Cell_0028	TFEB_TR	Glucose 17 mM + Glutamine 2.500000e-01 mM + EAA 1.000000e-01 X	1.1643	1.77471	0.996397	1.36061	1.57636	1.3816	1.30955	1.79533	0.7702	2.12159	2.09013	1.55753	1.92749	1.29523	1.01379	1.54646	1.04018	2.25134	1.04712	1.1873	3.44924	0.67239	0.8433	1.41928	2.18023	1.51584	2.30978	0.707279	1.61344	1.838	0.747574	1.71182	3.02252	1.1474	1.73241	2.23751	1.31946	1.41219	1.10308	1.06082	2.42587	1.14715	1.50062	1.92892	1.46014	1.40645	2.42987
Cell_0028	FOXO_TR	Glucose 17 mM + Glutamine 2.500000e-01 mM + EAA 1.000000e-01 X	1.81499	1.49451	0.976914	1.36085	1.09445	1.7521	1.10326	1.07366	1.61895	1.41556	1.5027	1.453	1.3687	1.43339	1.17385	1.8736	2.28998	1.11967	0.958576	2.18167	1.76457	1.28923	1.28298	1.94269	1.64903	1.72182	0.96533	1.75307	1.29602	1.38872	1.50138	1.52682	1.87633	1.48245	1.34213	1.36693	1.28076	1.27011	1.7218	1.68125	2.0219	1.61844	1.96765	1.66911	1.83251	1.94837	1.34451
Cell_0028	AMPKARt2	Glucose 17 mM + Glutamine 2.500000e-01 mM + EAA 1.000000e-01 X	0.537174	0.606213	0.505133	0.722295	0.609619	0.534525	0.688212	0.547895	0.510556	0.695396	0.539651	0.618206	0.573775	0.700857	0.613656	0.567095	0.678796	0.675443	0.46331	0.65145	0.596928	0.679376	0.51404	0.619891	0.630538	0.497329	0.51459	0.567164	0.505575	0.711239	0.72373	0.426985	0.590926	0.639514	0.693407	0.706163	0.51325	0.584807	0.717747	0.550886	0.728402	0.523885	0.443078	0.479553	0.612547	0.374798	0.567994
Cell_0029	TFEB_TR	Glucose 17 mM + Glutamine 2.500000e-01 mM + EAA 1.000000e-01 X	0.969275	1.80826	0.983998	1.09237	1.3425	1.33811	1.42174	2.05977	0.752198	2.00727	0.756698	1.62405	2.02242	1.36013	1.03341	1.46839	1.05249	2.03112	0.938535	1.18675	4.99558	1.01475	0.973656	1.24841	2.04789	2.19287	2.24279	0.668009	1.58577	1.47713	0.748922	1.65285	3.46732	0.986252	1.63876	2.04743	1.4282	1.16592	1.22976	1.09038	1.99449	0.768784	1.40767	1.9729	1.44181	1.64852	2.44432
Cell_0029	FOXO_TR	Glucose 17 mM + Glutamine 2.500000e-01 mM + EAA 1.000000e-01 X	1.81418	1.42755	0.955203	1.32538	1.13844	1.74384	1.11695	1.05777	1.63949	1.4068	1.9311	1.51313	1.34357	1.47402	1.20101	1.95182	2.20944	1.15529	0.940551	2.08825	1.79732	1.2769	1.27108	2.12137	1.67534	1.80204	0.99789	1.76775	1.2823	1.4038	1.57139	1.48213	1.94826	1.43904	1.35301	1.33399	1.29268	1.29791	1.71886	1.62781	1.92626	1.42652	1.92515	1.75517	1.84774	1.88065	1.33541
Cell_0029	AMPKARt2	Glucose 17 mM + Glutamine 2.500000e-01 mM + EAA 1.000000e-01 X	0.537723	0.609855	0.507286	0.728859	0.594851	0.491203	0.6904	0.543516	0.492492	0.677098	0.699756	0.623688	0.570797	0.697688	0.621554	0.561356	0.685094	0.678115	0.463948	0.623619	0.585108	0.682531	0.50603	0.638724	0.623403	0.488158	0.514829	0.565717	0.514393	0.718171	0.723504	0.432727	0.58299	0.638534	0.691442	0.698925	0.485031	0.602431	0.722022	0.53578	0.711671	0.594516	0.443277	0.482549	0.619526	0.365243	0.565972
Cell_0030	TFEB_TR	Glucose 17 mM + Glutamine 2.500000e-01 mM + EAA 1.000000e-01 X	1.12167	2.04447	0.998537	1.18655	1.47155	1.31353	1.58326	2.35523	0.886445	1.74738	0.772387	1.28078	1.92065	1.19798	1.01001	1.34341	1.12136	1.9161	0.908378	1.20423	4.35097	1.35157	1.1033	1.13726	1.85635	2.37887	2.24666	0.634683	1.40982	1.50658	0.693887	1.43728	3.83712	1.11214	1.39905	1.93598	1.49117	2.01074	1.29803	1.09375	2.29788	1.10262	1.55976	1.94031	1.41934	1.59649	2.54919
Cell_0030	FOXO_TR	Glucose 17 mM + Glutamine 2.500000e-01 mM + EAA 1.000000e-01 X	1.74676	1.38656	0.972315	1.31557	1.16381	1.622	1.14577	1.0605	1.55427	1.3696	1.98106	1.51144	1.30218	1.49176	1.21504	1.88485	2.21108	1.15007	0.922676	2.04913	1.84837	1.3186	1.20537	2.13826	1.70561	1.81378	1.00897	1.72728	1.28256	1.39917	1.5972	1.50138	1.97204	1.44591	1.35009	1.29798	1.33942	1.34493	1.6432	1.63907	2.20562	1.36028	1.87862	1.8267	1.84468	1.89533	1.30758
Cell_0030	AMPKARt2	Glucose 17 mM + Glutamine 2.500000e-01 mM + EAA 1.000000e-01 X	0.519801	0.621753	0.522344	0.752754	0.572848	0.462908	0.678127	0.5415	0.525938	0.687672	0.710495	0.622057	0.557793	0.718273	0.646798	0.556907	0.677863	0.679952	0.464402	0.579948	0.60209	0.684478	0.490657	0.630795	0.637029	0.479063	0.508185	0.570791	0.556378	0.724779	0.716601	0.425772	0.599995	0.658628	0.696877	0.71139	0.479404	0.617791	0.727983	0.520704	0.718392	0.587823	0.52033	0.48402	0.632131	0.382837	0.558701
Cell_0031	TFEB_TR	Glucose 17 mM + Glutamine 2.500000e-01 mM + EAA 1.000000e-01 X	1.21702	2.02003	1.03017	1.37785	1.4783	1.37571	1.72373	2.25523	1.03688	1.79664	0.715919	1.17379	1.73402	1.00296	1.0729	1.35746	1.09709	2.04807	0.97959	1.18714	2.29434	1.25214	1.15068	1.3683	1.37172	2.21857	2.16727	0.632064	1.25966	2.26919	0.786952	1.31713	3.67806	1.34039	1.38429	1.99004	1.37506	2.08097	1.19402	1.07097	2.10976	1.15559	1.61297	1.85732	1.41317	1.47811	2.44338
Cell_0031	FOXO_TR	Glucose 17 mM + Glutamine 2.500000e-01 mM + EAA 1.000000e-01 X	1.62908	1.34511	1.01983	1.3083	1.17006	1.45972	1.1442	1.04522	1.47495	1.36891	1.94874	1.44636	1.27777	1.4572	1.16104	1.81309	2.24723	1.09255	0.956544	2.02242	1.81062	1.3101	1.15356	2.08781	1.75872	1.77319	1.00021	1.61806	1.27632	1.39643	1.55958	1.4495	1.92472	1.56731	1.32864	1.26557	1.34284	1.41115	1.55055	1.65346	2.22184	1.31799	1.88577	1.80252	1.84829	1.91752	1.29234
Cell_0031	AMPKARt2	Glucose 17 mM + Glutamine 2.500000e-01 mM + EAA 1.000000e-01 X	0.515796	0.624958	0.542239	0.759003	0.572432	0.453857	0.675882	0.546821	0.53263	0.704741	0.709766	0.61707	0.564959	0.742452	0.639767	0.562221	0.671414	0.67826	0.455382	0.535465	0.609913	0.691239	0.504687	0.627399	0.751347	0.483768	0.512584	0.574507	0.575466	0.718483	0.717323	0.428725	0.600581	0.658155	0.703088	0.713549	0.505867	0.621525	0.730521	0.531402	0.733801	0.601793	0.606142	0.476279	0.620736	0.38673	0.547633
Cell_0032	TFEB_TR	Glucose 17 mM + Glutamine 2.500000e-01 mM + EAA 1.000000e-01 X	1.08262	2.01861	1.00409	1.32395	1.79878	1.45922	1.80644	2.49281	1.04558	1.8754	0.698161	1.48779	1.69309	1.02737	1.0723	1.42691	1.11627	2.09672	0.969756	1.23004	2.26381	1.01631	1.20409	1.54761	1.42774	2.71699	2.0172	0.562089	1.27502	2.60372	0.831492	1.4083	2.77438	1.18593	1.52547	1.91759	1.26797	1.40668	1.10445	1.0886	1.63801	1.02343	1.54591	1.87434	1.44073	1.74378	2.2643
Cell_0032	FOXO_TR	Glucose 17 mM + Glutamine 2.500000e-01 mM + EAA 1.000000e-01 X	1.50609	1.31221	1.05997	1.28471	1.2333	1.35168	1.1304	1.06103	1.43586	1.38983	1.89982	1.3901	1.30301	1.45408	1.11279	1.83677	2.31937	1.06142	1.00783	1.95311	1.75657	1.26008	1.15278	2.05592	1.74539	1.77342	0.995829	1.50564	1.26442	1.40875	1.51638	1.36828	1.86269	1.60282	1.34834	1.22766	1.30071	1.39991	1.52729	1.65029	1.93333	1.33237	1.81365	1.69534	1.90686	1.89563	1.3059
Cell_0032	AMPKARt2	Glucose 17 mM + Glutamine 2.500000e-01 mM + EAA 1.000000e-01 X	0.53248	0.613045	0.511124	0.75817	0.595599	0.442721	0.688346	0.563255	0.52092	0.693433	0.712791	0.614346	0.575875	0.734246	0.637709	0.564888	0.67246	0.679452	0.463034	0.503514	0.585716	0.690578	0.520631	0.63162	0.746087	0.482702	0.520886	0.573064	0.551846	0.718394	0.725562	0.445279	0.582431	0.617697	0.707208	0.701375	0.527029	0.628651	0.721811	0.535675	0.733501	0.615999	0.609302	0.467986	0.609674	0.362903	0.564128
Cell_0033	TFEB_TR	Glucose 17 mM + Glutamine 2.500000e-01 mM + EAA 1.000000e-01 X	1.13897	2.33959	0.984162	1.33342	2.52826	1.53263	1.83184	0.759745	1.02025	1.6017	0.74257	1.65543	1.75995	1.17661	0.960543	1.40149	1.20429	2.10577	0.925306	1.505	4.25929	0.972848	1.31468	1.34759	1.27034	2.80479	2.027	0.547706	1.33876	2.22453	0.719091	1.49577	2.44879	1.11998	1.7556	1.87857	1.35073	1.37966	0.767064	1.08261	1.63182	0.997873	1.45054	2.11951	1.49112	1.87661	2.20979
Cell_0033	FOXO_TR	Glucose 17 mM + Glutamine 2.500000e-01 mM + EAA 1.000000e-01 X	1.49907	1.3027	1.0687	1.27418	1.28709	1.32608	1.15594	1.61181	1.37246	1.34742	1.91012	1.3483	1.33619	1.53494	1.1211	1.82215	2.3402	1.0662	1.01344	1.8878	1.83811	1.30579	1.13294	1.95921	1.72609	1.76488	1.0015	1.4793	1.23667	1.39631	1.55381	1.38212	1.89106	1.57536	1.44058	1.20559	1.24569	1.34767	1.38196	1.61997	1.82086	1.37806	1.689	1.68205	1.95615	1.86569	1.32501
Cell_0033	AMPKARt2	Glucose 17 mM + Glutamine 2.500000e-01 mM + EAA 1.000000e-01 X	0.539436	0.615099	0.435169	0.757406	0.608408	0.429607	0.690728	0.632986	0.536377	0.67264	0.713974	0.62138	0.571706	0.71312	0.660975	0.571506	0.670143	0.690907	0.488138	0.477231	0.574785	0.681581	0.515258	0.625459	0.75235	0.473206	0.519211	0.586949	0.542891	0.730355	0.731811	0.449109	0.587313	0.586237	0.70664	0.70549	0.522855	0.632923	0.618728	0.517783	0.723981	0.614469	0.587447	0.470702	0.628241	0.347525	0.587735
Cell_0034	TFEB_TR	Glucose 17 mM + Glutamine 2.500000e-01 mM + EAA 1.000000e-01 X	1.13995	2.40608	1.06859	1.37666	2.50547	1.63097	1.84378	0.78508	1.15441	1.568	0.77016	1.59491	1.91787	1.27468	0.951895	1.36627	1.14673	1.93365	0.9718	1.72008	5.06521	0.985343	1.35741	1.13909	1.09087	2.02588	2.1394	0.617676	1.27309	1.97187	0.669318	1.37492	3.21583	1.23779	1.89701	1.92209	1.33495	1.71269	0.829146	1.00584	1.75059	1.03327	1.35456	2.34424	1.47489	1.61663	2.25785
Cell_0034	FOXO_TR	Glucose 17 mM + Glutamine 2.500000e-01 mM + EAA 1.000000e-01 X	1.6032	1.30672	1.05968	1.23317	1.28734	1.34512	1.18451	1.5386	1.36819	1.31484	1.93949	1.3413	1.34266	1.5747	1.08431	1.75513	2.19483	1.08419	0.991691	1.82423	1.94921	1.38127	1.07682	1.86183	1.73294	1.71561	1.00756	1.45558	1.17655	1.36046	1.65861	1.45025	1.99402	1.67123	1.53537	1.20792	1.14399	1.36908	1.43802	1.57091	1.80978	1.39171	1.63969	1.77604	1.93561	1.84827	1.33485
Cell_0034	AMPKARt2	Glucose 17 mM + Glutamine 2.500000e-01 mM + EAA 1.000000e-01 X	0.539856	0.630769	0.38502	0.740718	0.592719	0.422676	0.689044	0.640323	0.535002	0.6697	0.708527	0.624892	0.564897	0.723189	0.660361	0.58015	0.653493	0.690425	0.497598	0.451178	0.594389	0.685626	0.522296	0.611634	0.752839	0.478762	0.524124	0.600896	0.561931	0.731858	0.719859	0.446177	0.601925	0.591615	0.698465	0.713765	0.510235	0.62385	0.622403	0.509301	0.713253	0.607546	0.598878	0.472565	0.631104	0.359437	0.58471
Cell_0035	TFEB_TR	Glucose 17 mM + Glutamine 2.500000e-01 mM + EAA 1.000000e-01 X	0.995743	2.03073	1.2088	1.16524	1.89877	1.75392	1.93328	0.759577	1.17842	1.79693	0.785785	1.60327	2.03813	1.20792	1.01858	1.42164	1.10661	2.06305	1.13297	1.57041	3.60098	0.696011	1.31234	1.27356	1.01283	1.69872	2.12283	0.631038	1.193	1.87854	0.771075	1.18457	3.44587	1.02973	1.8994	1.8846	1.20954	1.75183	0.883417	1.02629	1.68601	0.967212	1.36969	2.17329	1.41985	1.55101	2.38519
Cell_0035	FOXO_TR	Glucose 17 mM + Glutamine 2.500000e-01 mM + EAA 1.000000e-01 X	1.62756	1.28488	1.07523	1.19419	1.33588	1.35797	1.17032	1.51527	1.4315	1.32262	1.93963	1.37212	1.36209	1.51358	1.00706	1.78002	2.01769	1.11503	1.01479	1.74951	1.91896	1.32506	1.06526	1.93536	1.74814	1.69859	1.01465	1.3558	1.13811	1.34701	1.72302	1.41302	2.0453	1.67146	1.60789	1.20939	1.05308	1.40166	1.36537	1.58276	1.76738	1.36657	1.60138	1.81734	1.89664	1.82174	1.34196
Cell_0035	AMPKARt2	Glucose 17 mM + Glutamine 2.500000e-01 mM + EAA 1.000000e-01 X	0.553791	0.629089	0.378516	0.728191	0.579565	0.416786	0.693594	0.642846	0.510078	0.682673	0.7184	0.610143	0.564599	0.740647	0.636966	0.575194	0.622859	0.671641	0.494067	0.439307	0.597232	0.50744	0.543674	0.606059	0.753145	0.491168	0.535058	0.580655	0.574059	0.726219	0.694081	0.458273	0.599489	0.598749	0.700808	0.701209	0.495088	0.624148	0.627595	0.493454	0.700824	0.604612	0.603966	0.470976	0.608647	0.381515	0.586345
Cell_0036	TFEB_TR	Glucose 17 mM + Glutamine 2.500000e-01 mM + EAA 1.000000e-01 X	1.23589	1.75379	1.33713	1.03254	1.6289	1.8601	2.01527	0.761662	0.896824	1.65412	0.781876	1.62535	1.95202	0.978753	0.990734	1.44288	1.32118	3.20303	1.29724	1.30533	2.44671	0.700948	1.29744	1.45973	0.996923	1.9715	2.04593	0.627062	1.18333	1.74369	0.885391	1.05426	3.09488	1.0237	2.13065	2.00572	1.35208	1.82417	0.864229	1.15762	1.56938	0.958777	1.47508	1.82428	1.45212	1.6403	2.4204
Cell_0036	FOXO_TR	Glucose 17 mM + Glutamine 2.500000e-01 mM + EAA 1.000000e-01 X	1.5586	1.24924	1.0969	1.23699	1.41337	1.35194	1.15127	1.4978	1.47097	1.28114	1.94953	1.40013	1.42658	1.53612	1.00822	1.81762	1.92497	1.13413	1.07893	1.72321	1.92473	1.32037	1.11129	2.04137	1.77181	1.65471	1.01276	1.28593	1.14679	1.37786	1.69387	1.30397	2.03952	1.45861	1.65676	1.2122	1.08543	1.39989	1.25461	1.60841	1.80493	1.36352	1.52825	1.78694	1.9722	1.80593	1.34938
Cell_0036	AMPKARt2	Glucose 17 mM + Glutamine 2.500000e-01 mM + EAA 1.000000e-01 X	0.567184	0.619906	0.383016	0.737525	0.594024	0.416188	0.685423	0.639785	0.506999	0.69193	0.72684	0.606081	0.569521	0.721581	0.626993	0.567597	0.603959	0.666688	0.491737	0.440091	0.581153	0.520401	0.549664	0.60798	0.763121	0.494138	0.531469	0.566959	0.577108	0.728742	0.677484	0.471814	0.595584	0.586753	0.71619	0.691663	0.48618	0.633771	0.62829	0.466561	0.698534	0.611023	0.592788	0.477588	0.614737	0.387686	0.599036
Cell_0037	TFEB_TR	Glucose 17 mM + Glutamine 2.500000e-01 mM + EAA 1.000000e-01 X	1.47941	1.65333	1.41371	1.11979	0.441343	1.94358	1.88614	0.771222	0.697346	1.48808	0.732087	1.52482	1.85367	1.02269	0.945972	1.33978	1.49827	3.98909	1.25495	1.21055	2.92525	0.716793	1.26975	1.38448	1.12048	2.33105	2.04778	0.660685	1.1381	1.70585	0.897704	1.14635	3.52251	1.58202	2.44701	0.763257	1.5002	1.92822	0.863563	1.1646	1.47614	1.05575	1.51085	1.73517	1.55194	1.45176	2.31639
Cell_0037	FOXO_TR	Glucose 17 mM + Glutamine 2.500000e-01 mM + EAA 1.000000e-01 X	1.58008	1.26657	1.06644	1.29647	1.35687	1.34282	1.14595	1.51041	1.50993	1.24694	1.9839	1.40693	1.50416	1.66842	1.01065	1.75167	1.82727	1.15412	1.10101	1.73989	2.09396	1.34589	1.13019	1.9812	1.80581	1.55277	0.99104	1.292	1.12791	1.43958	1.59049	1.32253	2.04511	1.34518	1.65821	2.25498	1.19368	1.41342	1.22428	1.56268	1.89905	1.40359	1.47621	1.75887	2.22125	1.7917	1.35228
Cell_0037	AMPKARt2	Glucose 17 mM + Glutamine 2.500000e-01 mM + EAA 1.000000e-01 X	0.570426	0.62714	0.383965	0.745213	0.48978	0.434001	0.671141	0.637071	0.518695	0.693595	0.707285	0.62272	0.572113	0.696609	0.631223	0.567634	0.610409	0.68412	0.489055	0.437867	0.585935	0.515846	0.543972	0.61181	0.763515	0.497356	0.520995	0.588377	0.575972	0.732416	0.671769	0.472153	0.600934	0.575808	0.711263	0.716417	0.502673	0.628112	0.630524	0.490085	0.708081	0.620656	0.593794	0.48506	0.616855	0.377906	0.588661
Cell_0038	TFEB_TR	Glucose 17 mM + Glutamine 2.500000e-01 mM + EAA 1.000000e-01 X	1.21709	1.56149	1.40752	1.10614	0.441423	2.02252	1.7186	0.76835	0.728166	1.61873	0.708852	1.3666	1.89666	1.4534	1.00615	1.24639	1.45567	3.31391	1.10049	1.26955	3.20092	0.711436	1.1008	1.23427	1.25666	2.57643	2.05778	0.649686	1.13018	1.63271	0.950995	1.53068	3.58336	1.98011	2.22174	0.708572	1.37067	1.65329	0.912158	1.11686	1.68895	1.063	1.46382	1.77432	1.59586	1.36103	2.391
Cell_0038	FOXO_TR	Glucose 17 mM + Glutamine 2.500000e-01 mM + EAA 1.000000e-01 X	1.683	1.30064	1.00438	1.31532	1.37045	1.33276	1.11974	1.59726	1.5321	1.29042	1.9849	1.37662	1.55628	1.66872	0.957646	1.70227	1.70629	1.1719	1.09093	1.71867	2.16714	1.33091	1.08674	1.91187	1.78547	1.56494	0.969243	1.29984	1.09382	1.49398	1.48949	1.42625	2.0247	1.36464	1.65627	2.32198	1.25784	1.42148	1.24507	1.53942	2.03804	1.4102	1.46025	1.72634	2.42646	1.72549	1.35751
Cell_0038	AMPKARt2	Glucose 17 mM + Glutamine 2.500000e-01 mM + EAA 1.000000e-01 X	0.577459	0.633807	0.388155	0.739362	0.503547	0.452862	0.675181	0.634747	0.532372	0.70872	0.703586	0.616625	0.570678	0.705846	0.643418	0.566713	0.617968	0.690993	0.494447	0.439209	0.590955	0.511885	0.542584	0.62324	0.758501	0.493121	0.516342	0.569554	0.566627	0.732976	0.674338	0.466196	0.597331	0.57359	0.6911	0.707401	0.522841	0.618732	0.639122	0.533938	0.710611	0.617245	0.601458	0.48115	0.566616	0.37903	0.58358
Cell_0039	TFEB_TR	Glucose 17 mM + Glutamine 2.500000e-01 mM + EAA 1.000000e-01 X	1.13388	1.76417	1.40809	1.1277	0.448827	2.08543	1.7686	0.81968	0.788754	1.59721	0.763273	1.25572	1.85693	1.49025	1.11944	1.26452	1.48086	2.81462	1.31477	1.4967	2.93618	0.690084	0.953735	1.21935	1.17968	2.12889	2.06026	0.621195	1.19866	1.75481	1.15981	1.69458	2.738	1.93552	1.74051	0.746702	1.42053	1.28541	0.879669	1.22983	2.26936	1.05739	1.47066	1.71637	1.65239	1.46697	2.5296
Cell_0039	FOXO_TR	Glucose 17 mM + Glutamine 2.500000e-01 mM + EAA 1.000000e-01 X	1.72236	1.29554	0.986175	1.29652	1.38282	1.32013	1.0887	1.63456	1.46934	1.31251	2.00299	1.33352	1.57586	1.5833	1.04598	1.71506	1.60373	1.11541	1.77205	1.65443	2.05507	1.28598	1.05223	1.96675	1.78185	1.67548	0.960348	1.29828	1.11237	1.51401	1.45537	1.39121	1.9892	1.33351	1.65395	2.26874	1.24333	1.41644	1.25203	1.55842	2.1416	1.35893	1.47782	1.69295	2.35137	1.67423	1.37557
Cell_0039	AMPKARt2	Glucose 17 mM + Glutamine 2.500000e-01 mM + EAA 1.000000e-01 X	0.583714	0.62844	0.398974	0.733807	0.523362	0.45844	0.684576	0.631821	0.550229	0.723223	0.729653	0.593324	0.571297	0.722373	0.654201	0.567365	0.622274	0.675224	0.442564	0.447009	0.577535	0.512673	0.545758	0.629458	0.763636	0.476696	0.51408	0.497628	0.567792	0.733767	0.690888	0.462572	0.585833	0.573926	0.690244	0.710052	0.513887	0.61778	0.643173	0.523568	0.700772	0.612002	0.603688	0.477109	0.528306	0.383275	0.607698
Cell_0040	TFEB_TR	Glucose 17 mM + Glutamine 2.500000e-01 mM + EAA 1.000000e-01 X	1.46589	2.22871	1.4948	1.25515	0.453401	2.09037	1.86454	0.835596	0.876433	1.54378	0.809745	1.25043	1.71983	1.19609	1.21103	1.31137	1.58775	3.19041	0.975195	1.82843	3.1241	0.708606	1.02973	1.29398	1.09138	1.57858	2.16947	0.640234	1.19267	2.12455	1.27716	1.4758	3.04963	1.67258	1.67867	0.736881	1.70625	1.4869	0.808943	1.28727	2.39743	1.15117	1.53699	1.74167	1.81845	1.36044	2.33934
Cell_0040	FOXO_TR	Glucose 17 mM + Glutamine 2.500000e-01 mM + EAA 1.000000e-01 X	1.70262	1.32841	1.02128	1.23855	1.38989	1.31	1.08061	1.5514	1.38521	1.27582	2.15464	1.35159	1.58871	1.66797	1.25146	1.67731	1.48654	1.044	1.74428	1.59626	1.96226	1.29531	1.08621	1.98536	1.88472	1.67344	0.970608	1.29318	1.15305	1.52433	1.43314	1.25833	2.04832	1.31663	1.58966	2.2182	1.19957	1.4112	1.25477	1.50998	2.02309	1.33341	1.46678	1.73161	2.15309	1.7147	1.38105
Cell_0040	AMPKARt2	Glucose 17 mM + Glutamine 2.500000e-01 mM + EAA 1.000000e-01 X	0.583288	0.634654	0.408207	0.728012	0.527478	0.472428	0.683114	0.629908	0.552164	0.704658	0.712379	0.598648	0.569645	0.719578	0.654738	0.568974	0.635397	0.666642	0.431872	0.449302	0.584091	0.509778	0.553618	0.619868	0.76133	0.47366	0.51441	0.465753	0.585987	0.732843	0.700833	0.46908	0.595889	0.579412	0.692483	0.72152	0.502436	0.616939	0.644574	0.513806	0.699169	0.618155	0.59863	0.488181	0.532109	0.368648	0.607834
Cell_0041	TFEB_TR	Glucose 17 mM + Glutamine 2.500000e-01 mM + EAA 1.000000e-01 X	1.4279	1.16006	1.56609	1.17679	0.450537	1.99423	1.81583	0.785236	0.938118	1.6522	0.806069	1.35189	1.79704	1.55385	1.27944	1.31183	1.56294	3.09679	0.954881	1.93252	2.82684	0.750787	1.10237	1.36141	1.16347	2.09293	2.29657	0.665833	1.17653	1.89552	1.23776	1.47397	1.24537	1.39995	1.66307	0.691043	1.74908	1.98311	0.798925	1.16522	2.02631	1.14029	1.49217	1.85298	1.91159	1.48503	2.15133
Cell_0041	FOXO_TR	Glucose 17 mM + Glutamine 2.500000e-01 mM + EAA 1.000000e-01 X	1.68451	1.35937	1.04047	1.20861	1.40401	1.293	1.06498	1.47855	1.34856	1.24329	2.34772	1.38945	1.63058	1.80775	1.3002	1.59603	1.37055	1.08169	1.65422	1.55734	1.92109	1.32186	1.13005	1.8975	1.93125	1.57868	1.00231	1.271	1.20862	1.56428	1.3996	1.24031	1.46609	1.3184	1.52516	2.16719	1.21877	1.39539	1.27902	1.44912	1.8947	1.34509	1.36429	1.82222	2.06295	1.79619	1.37142
Cell_0041	AMPKARt2	Glucose 17 mM + Glutamine 2.500000e-01 mM + EAA 1.000000e-01 X	0.59463	0.581155	0.411172	0.711848	0.521325	0.491889	0.68417	0.627623	0.540397	0.681815	0.657478	0.612623	0.56782	0.705165	0.660282	0.571324	0.635704	0.677199	0.426935	0.450342	0.60531	0.505784	0.563608	0.618397	0.748909	0.483392	0.515703	0.478016	0.592946	0.73428	0.687019	0.479055	0.648289	0.580481	0.681186	0.727765	0.516541	0.624007	0.648929	0.538849	0.711347	0.607768	0.590499	0.499399	0.522039	0.367864	0.576845
Cell_0042	TFEB_TR	Glucose 17 mM + Glutamine 2.500000e-01 mM + EAA 1.000000e-01 X	0.995728	1.17421	1.5566	1.06996	0.449906	1.81835	1.65231	0.809825	0.905892	1.54653	0.879108	1.46591	2.16418	2.03519	1.30964	1.31382	1.54861	2.63384	1.09166	1.75406	2.33728	0.748949	1.01803	1.31588	1.18691	2.65756	2.20038	0.697009	1.27674	1.47897	1.22751	1.67975	1.12287	1.40097	1.45114	0.735752	1.51785	1.80213	0.803683	1.16939	2.34848	0.971241	1.40973	1.89393	1.90495	1.98033	2.25327
Cell_0042	FOXO_TR	Glucose 17 mM + Glutamine 2.500000e-01 mM + EAA 1.000000e-01 X	1.67326	1.35617	1.01776	1.23101	1.43318	1.2755	1.03523	1.4427	1.34752	1.21887	2.4066	1.37125	1.69694	1.79266	1.24357	1.57218	1.29687	1.14796	1.68618	1.52298	1.89193	1.31548	1.12974	1.85541	1.88757	1.52975	1.00567	1.26092	1.27363	1.60889	1.41871	1.3347	1.47916	1.2522	1.53599	2.06974	1.29733	1.44111	1.29304	1.44649	2.02767	1.34658	1.28523	1.87671	1.98401	1.89034	1.40561
Cell_0042	AMPKARt2	Glucose 17 mM + Glutamine 2.500000e-01 mM + EAA 1.000000e-01 X	0.606756	0.580036	0.41827	0.700193	0.525574	0.494491	0.694182	0.640342	0.542753	0.682231	0.649894	0.603946	0.573	0.689915	0.675196	0.59024	0.6223	0.68195	0.431734	0.457407	0.606419	0.502496	0.566647	0.623372	0.743595	0.484406	0.514956	0.475287	0.581413	0.739884	0.67476	0.478535	0.6404	0.577411	0.684887	0.719092	0.522673	0.630072	0.642263	0.530706	0.703421	0.578317	0.592161	0.495226	0.494673	0.396958	0.57239
Cell_0043	TFEB_TR	Glucose 17 mM + Glutamine 2.500000e-01 mM + EAA 1.000000e-01 X	0.890148	1.188	1.53376	1.10276	0.452685	1.65397	1.54544	0.818246	0.893007	1.47122	1.0795	1.46586	2.56359	1.6907	1.25859	0.906461	1.5968	2.56137	1.12268	1.65776	3.18512	0.714823	1.01955	1.25086	1.06994	2.1865	1.99116	0.759478	1.37494	1.98543	1.21597	1.60551	1.21471	1.51135	1.70091	0.776947	1.25815	1.36168	0.816642	1.2766	2.74538	0.893508	1.50564	1.95567	2.0605	1.90609	0.857992
Cell_0043	FOXO_TR	Glucose 17 mM + Glutamine 2.500000e-01 mM + EAA 1.000000e-01 X	1.67774	1.36142	0.999708	1.23498	1.46006	1.28118	1.03175	1.37034	1.36273	1.21136	2.36806	1.39273	1.76284	1.72618	1.28514	1.66203	1.23025	1.1294	1.81432	1.4915	1.92672	1.32968	1.13369	1.93682	1.94635	1.52495	0.973239	1.27036	1.25047	1.60242	1.43786	1.38859	1.44165	1.21544	1.57744	2.02012	1.31537	1.55667	1.29084	1.4259	2.1568	1.36468	1.33616	1.94636	1.81769	1.96279	2.30389
Cell_0043	AMPKARt2	Glucose 17 mM + Glutamine 2.500000e-01 mM + EAA 1.000000e-01 X	0.589366	0.580041	0.43983	0.71002	0.525347	0.494065	0.699338	0.658516	0.556958	0.684264	0.668367	0.599998	0.570463	0.696955	0.680856	0.527216	0.631228	0.675143	0.43819	0.471913	0.602389	0.509353	0.562562	0.611886	0.741653	0.482236	0.514831	0.475301	0.577562	0.741007	0.681693	0.476075	0.647008	0.594301	0.699176	0.709202	0.509801	0.617436	0.634658	0.518159	0.67497	0.573821	0.593026	0.494114	0.477781	0.410713	0.510855
Cell_0044	TFEB_TR	Glucose 17 mM + Glutamine 2.500000e-01 mM + EAA 1.000000e-01 X	1.05261	1.20208	1.49939	1.02965	0.449431	1.57255	1.70387	0.748208	0.947636	1.78072	1.29245	1.43347	2.64504	1.33166	1.17331	0.919302	1.49652	2.40814	1.03073	1.71805	3.48496	0.690748	1.09732	1.36597	1.02944	1.81907	1.99125	0.856667	1.3916	2.35117	1.29584	1.37786	1.37473	1.4443	2.07321	0.728832	1.18673	1.87025	0.86783	1.24479	1.97482	1.07141	1.58239	1.93723	2.2718	1.38304	0.874604
Cell_0044	FOXO_TR	Glucose 17 mM + Glutamine 2.500000e-01 mM + EAA 1.000000e-01 X	1.70681	1.35971	0.994151	1.21355	1.46711	1.28401	1.06006	1.34628	1.34394	1.23615	2.3382	1.48648	1.82445	1.67343	1.36343	1.69615	1.16873	1.08229	1.82539	1.49566	1.97529	1.34907	1.14041	2.00042	2.05413	1.52647	0.983494	1.26736	1.16064	1.585	1.39873	1.36268	1.40651	1.24224	1.63117	2.04732	1.27688	1.60474	1.33387	1.4003	2.1269	1.4026	1.41841	2.06022	1.68267	1.97204	2.22768
Cell_0044	AMPKARt2	Glucose 17 mM + Glutamine 2.500000e-01 mM + EAA 1.000000e-01 X	0.571561	0.577305	0.470436	0.722743	0.517725	0.498331	0.692099	0.617509	0.563008	0.688041	0.652698	0.609351	0.55732	0.722473	0.673156	0.525784	0.651142	0.674261	0.44372	0.491417	0.598192	0.519771	0.557803	0.604787	0.744914	0.487269	0.516923	0.491589	0.591395	0.737244	0.690757	0.478893	0.658125	0.615384	0.692178	0.717085	0.518441	0.611134	0.653293	0.560308	0.677196	0.587381	0.578033	0.498504	0.474766	0.401351	0.52381
Cell_0045	TFEB_TR	Glucose 17 mM + Glutamine 2.500000e-01 mM + EAA 1.000000e-01 X	0.954217	1.22409	1.42301	1.04048	0.443856	1.56384	1.85408	0.788543	1.07324	1.9257	1.49404	1.50935	2.38413	1.52871	1.17002	0.917828	1.39418	2.21709	0.999595	1.68061	2.06978	0.682711	1.08052	1.44094	1.36272	2.06541	2.09843	0.992677	1.38217	0.692502	1.53613	1.28169	1.43895	1.40891	1.71482	0.680709	1.3409	2.41319	0.930659	1.21853	1.73174	1.37879	1.5117	1.78018	2.20372	1.40513	0.897239
Cell_0045	FOXO_TR	Glucose 17 mM + Glutamine 2.500000e-01 mM + EAA 1.000000e-01 X	1.75109	1.32284	0.978021	1.19952	1.45197	1.25801	1.08778	1.41938	1.27805	1.23685	2.27698	1.52153	1.86367	1.568	1.38625	1.63792	1.14309	1.05443	1.80941	1.53294	1.95989	1.31945	1.12223	1.92184	2.10779	1.5437	1.02796	1.24578	1.13259	1.19579	1.37958	1.32355	1.38278	1.22676	1.69028	2.14014	1.29707	1.57412	1.39727	1.43038	2.20991	1.40025	1.42772	2.13285	1.63273	2.03461	2.26931
Cell_0045	AMPKARt2	Glucose 17 mM + Glutamine 2.500000e-01 mM + EAA 1.000000e-01 X	0.582189	0.571481	0.490865	0.719719	0.521751	0.492946	0.683123	0.528609	0.560419	0.697435	0.636467	0.607874	0.553133	0.722589	0.661796	0.526611	0.647331	0.680581	0.444537	0.503334	0.586665	0.509663	0.557626	0.614007	0.756286	0.490516	0.527139	0.483686	0.609377	0.639224	0.693283	0.47856	0.654693	0.611911	0.681278	0.725391	0.542059	0.617482	0.670371	0.584684	0.697754	0.574528	0.565381	0.495076	0.505253	0.40076	0.510263
Cell_0046	TFEB_TR	Glucose 17 mM + Glutamine 2.500000e-01 mM + EAA 1.000000e-01 X	0.911493	1.23828	1.37213	1.2083	0.447181	1.53465	1.62312	0.860313	1.18585	1.71273	1.6729	1.49481	2.17759	1.61082	1.25711	0.882521	1.47769	2.44472	1.1192	1.59367	1.95096	0.703884	1.10235	1.28713	1.89596	2.21957	2.05069	1.06718	1.32321	0.618885	1.65819	1.3694	1.41389	1.4726	1.3837	0.687455	1.39017	1.86966	0.99913	1.2565	2.75595	1.4567	1.56745	1.80677	1.96036	1.73556	0.915016
Cell_0046	FOXO_TR	Glucose 17 mM + Glutamine 2.500000e-01 mM + EAA 1.000000e-01 X	1.77315	1.27044	0.963375	1.19798	1.42212	1.24041	1.11551	1.46051	1.22861	1.20603	2.13989	1.53255	1.85916	1.49652	1.39301	1.57032	1.11316	1.02731	1.89116	1.5524	1.90409	1.32999	1.13111	1.84258	2.18474	1.5958	1.04572	1.23632	1.14206	1.17817	1.38272	1.28454	1.33683	1.19212	1.71356	2.20841	1.34094	1.55494	1.40171	1.46114	2.32738	1.35527	1.38455	2.21369	1.60388	2.16259	2.3225
Cell_0046	AMPKARt2	Glucose 17 mM + Glutamine 2.500000e-01 mM + EAA 1.000000e-01 X	0.579471	0.574643	0.491243	0.711043	0.522402	0.487765	0.683921	0.486427	0.56004	0.695992	0.639229	0.60456	0.559826	0.708217	0.656662	0.536287	0.633018	0.688373	0.436472	0.524069	0.602332	0.501864	0.566677	0.612754	0.757071	0.483883	0.538511	0.457827	0.620241	0.651688	0.697193	0.478451	0.642255	0.606493	0.687844	0.713505	0.543129	0.609016	0.646557	0.563998	0.687146	0.548038	0.564127	0.508653	0.561527	0.403089	0.504917
Cell_0047	TFEB_TR	Glucose 17 mM + Glutamine 2.500000e-01 mM + EAA 1.000000e-01 X	1.33545	1.2302	1.40806	1.08795	0.452759	1.46889	1.34088	0.912192	1.19049	1.60507	1.73909	1.32764	1.16931	1.48106	1.32283	0.868489	1.52392	2.65084	1.14752	1.72612	3.33474	0.734002	1.13151	1.16977	1.96383	2.85524	2.02795	1.04915	1.2143	0.617169	1.64934	1.62167	1.32437	1.43686	1.7966	0.731067	1.29335	1.58643	1.08411	1.2235	2.76908	1.32836	1.6234	0.612158	1.82809	1.69272	0.942472
Cell_0047	FOXO_TR	Glucose 17 mM + Glutamine 2.500000e-01 mM + EAA 1.000000e-01 X	1.75134	1.23893	0.96267	1.2119	1.39512	1.24401	1.15843	1.43671	1.19043	1.21259	1.99316	1.59233	1.99923	1.48683	1.40678	1.56683	1.08011	1.03571	1.91547	1.57529	1.85735	1.43139	1.12233	1.90326	2.19085	1.66221	1.06189	1.27971	1.11478	1.1695	1.34051	1.24555	1.33326	1.1948	1.74217	2.15266	1.31518	1.53657	1.39188	1.46514	2.20203	1.31392	1.32845	1.13549	1.56988	2.12975	2.29952
Cell_0047	AMPKARt2	Glucose 17 mM + Glutamine 2.500000e-01 mM + EAA 1.000000e-01 X	0.555895	0.586766	0.48732	0.707962	0.514684	0.492174	0.691124	0.485332	0.562335	0.698012	0.62909	0.602141	0.554583	0.718893	0.663585	0.544506	0.62856	0.69515	0.441933	0.573401	0.640031	0.515526	0.579266	0.603389	0.749978	0.477283	0.527418	0.456366	0.622692	0.657741	0.699769	0.481196	0.647164	0.610733	0.687086	0.707914	0.534352	0.60271	0.610261	0.571592	0.674964	0.542388	0.566216	0.657085	0.586044	0.399095	0.514311
Cell_0048	TFEB_TR	Glucose 17 mM + Glutamine 2.500000e-01 mM + EAA 1.000000e-01 X	1.59295	1.22786	1.46096	0.947794	0.45318	1.51019	1.32999	1.16761	1.18292	1.62305	1.80015	1.30842	1.87665	1.36767	1.29386	0.910272	1.47424	2.6266	1.001	1.97976	3.05275	0.721314	1.04487	1.1432	1.57301	3.84139	2.20841	1.10929	1.22641	0.639501	1.5352	1.70121	1.26074	1.35633	2.05359	0.772185	1.29664	1.94317	1.13007	1.2435	1.83946	1.51651	1.45232	0.625677	1.75859	1.4322	0.973788
Cell_0048	FOXO_TR	Glucose 17 mM + Glutamine 2.500000e-01 mM + EAA 1.000000e-01 X	1.74785	1.22362	0.974233	1.23436	1.38857	1.2501	1.16342	1.42668	1.1446	1.24822	1.8614	1.59039	1.99901	1.39132	1.40944	1.58687	1.09772	1.09317	1.88237	1.62998	1.85874	1.49502	1.0587	1.97797	2.04824	1.69896	1.07956	1.34071	1.09699	1.18213	1.29359	1.28719	1.39202	1.19021	1.79589	2.2083	1.2751	1.52952	1.4162	1.47223	2.09405	1.30229	1.27549	1.16661	1.52579	1.91671	2.2308
Cell_0048	AMPKARt2	Glucose 17 mM + Glutamine 2.500000e-01 mM + EAA 1.000000e-01 X	0.56048	0.592136	0.491047	0.717541	0.527401	0.498069	0.696712	0.460053	0.562124	0.707983	0.617305	0.584538	0.553823	0.730733	0.667002	0.544167	0.631354	0.696253	0.450875	0.60388	0.64035	0.508073	0.584314	0.604032	0.754154	0.478558	0.508006	0.467765	0.624707	0.654766	0.694538	0.476578	0.657826	0.612487	0.673159	0.721963	0.537038	0.613384	0.60193	0.593007	0.685507	0.549888	0.575895	0.675097	0.572473	0.40535	0.504862
Cell_0049	TFEB_TR	Glucose 17 mM + Glutamine 2.500000e-01 mM + EAA 1.000000e-01 X	1.33655	1.24589	1.39813	1.22225	0.455257	1.64687	1.45933	1.36275	1.10735	1.7416	1.94395	1.36822	1.80827	1.14538	1.25438	0.929202	1.48896	2.5949	0.966842	2.01796	1.63761	0.693251	1.10302	1.11213	1.34422	3.24868	0.565434	1.20025	1.39152	0.639168	1.19326	1.42397	1.40086	1.34496	1.74112	0.791749	1.2587	1.68416	1.04902	1.35588	1.70207	1.88222	1.41126	0.623464	1.61024	1.2923	0.977833
Cell_0049	FOXO_TR	Glucose 17 mM + Glutamine 2.500000e-01 mM + EAA 1.000000e-01 X	1.77423	1.22823	0.97759	1.26357	1.40383	1.27174	1.11066	1.40423	1.17939	1.25788	1.7328	1.5551	2.04789	1.25955	1.38788	1.57222	1.111	1.11983	1.93595	1.65291	1.85972	1.46663	1.10791	1.98297	1.93971	1.72646	1.61268	1.32958	1.12848	1.16229	1.28138	1.37185	1.42439	1.18533	1.80308	2.48097	1.27586	1.56849	1.40151	1.48285	2.21448	1.31514	1.24602	1.16011	1.48874	1.72278	2.15236
Cell_0049	AMPKARt2	Glucose 17 mM + Glutamine 2.500000e-01 mM + EAA 1.000000e-01 X	0.579511	0.59219	0.493111	0.735381	0.548962	0.507718	0.697133	0.432033	0.560813	0.69835	0.617917	0.579081	0.56454	0.722696	0.651009	0.541504	0.639225	0.692396	0.43125	0.591736	0.611056	0.477681	0.581936	0.605666	0.763836	0.481297	0.604324	0.460962	0.631965	0.647363	0.688163	0.467828	0.63977	0.623169	0.673815	0.719146	0.542723	0.607494	0.60966	0.585518	0.687447	0.548779	0.584264	0.678196	0.573208	0.414845	0.494661
Cell_0050	TFEB_TR	Glucose 17 mM + Glutamine 2.500000e-01 mM + EAA 1.000000e-01 X	1.12433	1.26227	1.25965	1.35478	0.455622	1.69444	1.64547	1.23569	0.992405	2.04907	1.98763	1.38139	1.25614	1.02491	1.35784	0.902114	1.51318	2.52112	1.04865	1.96196	1.49727	0.697945	1.35082	1.17811	1.30694	1.78588	0.499588	1.13261	1.44508	0.628763	1.0765	1.24056	1.70394	1.35182	1.58105	0.848164	1.25705	1.52078	0.931233	1.40868	2.01647	1.86455	1.5709	0.632898	1.52962	1.37017	1.00577
Cell_0050	FOXO_TR	Glucose 17 mM + Glutamine 2.500000e-01 mM + EAA 1.000000e-01 X	1.74138	1.25304	0.955889	1.28211	1.43184	1.29939	1.1021	1.34394	1.2816	1.25216	1.70501	1.5965	2.08739	1.24622	1.36657	1.53778	1.0749	1.08797	1.93505	1.63215	1.77232	1.42554	1.25466	2.00373	1.8954	1.76011	1.58031	1.26865	1.16296	1.095	1.25719	1.34744	1.43457	1.20112	1.79231	2.60254	1.28296	1.55914	1.31138	1.49954	2.27783	1.31619	1.24633	1.1435	1.49679	1.5993	2.1626
Cell_0050	AMPKARt2	Glucose 17 mM + Glutamine 2.500000e-01 mM + EAA 1.000000e-01 X	0.57445	0.592918	0.49207	0.732541	0.545561	0.513344	0.694532	0.424836	0.555942	0.678714	0.606548	0.594298	0.575359	0.723518	0.636683	0.535253	0.645811	0.687329	0.443384	0.595416	0.603652	0.468931	0.574054	0.604239	0.769338	0.491555	0.618775	0.452577	0.639802	0.63952	0.688546	0.466006	0.627744	0.631497	0.684904	0.695956	0.537881	0.589141	0.606711	0.588651	0.69692	0.539308	0.577376	0.669939	0.593451	0.408263	0.501651
Cell_0051	TFEB_TR	Glucose 17 mM + Glutamine 2.500000e-01 mM + EAA 1.000000e-01 X	1.09236	1.27169	1.24467	1.07938	0.452688	1.73485	1.69431	1.259	1.09402	1.61887	1.95774	1.51293	0.91407	1.09907	1.53029	0.888606	1.52268	2.39315	1.06977	2.13105	1.96166	0.706529	1.50597	1.21908	1.36835	1.944	0.479822	1.05227	1.32248	0.619176	1.35978	1.3195	1.79675	1.30895	1.69149	0.954467	1.54051	2.15488	0.976258	1.43392	0.616295	1.79893	1.57149	0.64917	1.69572	1.54709	1.06875
Cell_0051	FOXO_TR	Glucose 17 mM + Glutamine 2.500000e-01 mM + EAA 1.000000e-01 X	1.68411	1.25968	0.952465	1.24916	1.45537	1.31268	1.14444	1.32928	1.28533	2.56247	1.79083	1.61872	2.032	1.25709	1.3673	1.53426	1.0598	1.07436	1.82557	1.59675	1.68042	1.37847	1.26387	2.03643	1.82553	1.75157	1.59361	1.23665	1.15723	1.04717	1.20581	1.28102	1.45567	1.17973	1.82778	2.532	1.30916	1.47361	1.23815	1.50396	1.87937	1.28435	1.25058	1.14179	1.51781	1.53806	2.27354
Cell_0051	AMPKARt2	Glucose 17 mM + Glutamine 2.500000e-01 mM + EAA 1.000000e-01 X	0.56976	0.590947	0.49636	0.711172	0.524088	0.505765	0.69885	0.399324	0.545159	0.537845	0.592194	0.58534	0.586746	0.73864	0.645321	0.534795	0.647461	0.688785	0.514352	0.622227	0.605689	0.470863	0.561855	0.606608	0.769612	0.508316	0.607278	0.461054	0.644253	0.633438	0.693769	0.467467	0.650652	0.621453	0.683461	0.686869	0.517172	0.588323	0.595948	0.607703	0.512948	0.540646	0.56712	0.668232	0.591529	0.401248	0.492199
Cell_0052	TFEB_TR	Glucose 17 mM + Glutamine 2.500000e-01 mM + EAA 1.000000e-01 X	1.12875	1.28207	1.32027	0.964014	0.459349	1.93867	1.54831	1.52354	1.12269	1.37971	2.02814	1.53648	1.26357	1.07997	1.50686	0.867392	1.53891	2.00806	1.08896	2.30066	1.80777	0.707086	1.60238	1.13762	1.71084	2.77356	0.475141	1.0751	1.25958	0.619883	1.39006	1.36229	1.51439	1.26863	1.72079	1.06574	1.62807	2.38659	1.05487	1.4639	0.60939	2.02273	1.484	0.65308	1.94701	1.53969	1.0522
Cell_0052	FOXO_TR	Glucose 17 mM + Glutamine 2.500000e-01 mM + EAA 1.000000e-01 X	1.70638	1.25167	0.975293	1.19193	1.44327	1.34995	1.13096	1.34495	1.19971	2.49929	1.81772	1.62002	1.95439	1.1944	1.34071	1.50618	1.06097	1.10299	1.84437	1.5333	1.69568	1.30352	1.18224	2.01902	1.80187	1.72351	1.57313	1.22056	1.13673	1.02119	1.17726	1.3065	1.46194	1.15046	1.84695	2.56071	1.36691	1.46912	1.27767	1.47124	1.88054	1.25217	1.2483	1.17089	1.50775	1.57299	2.31034
Cell_0052	AMPKARt2	Glucose 17 mM + Glutamine 2.500000e-01 mM + EAA 1.000000e-01 X	0.580455	0.590751	0.503094	0.713302	0.511487	0.506874	0.708938	0.367134	0.542861	0.552568	0.603766	0.555661	0.58525	0.741849	0.65845	0.543881	0.653315	0.698963	0.526853	0.623476	0.592214	0.459334	0.558516	0.610539	0.765708	0.501866	0.595299	0.467139	0.639215	0.639982	0.699592	0.465944	0.633195	0.626378	0.675539	0.687221	0.511996	0.583608	0.5972	0.607948	0.503233	0.546452	0.563621	0.677522	0.572725	0.414286	0.488232
Cell_0053	TFEB_TR	Glucose 17 mM + Glutamine 2.500000e-01 mM + EAA 1.000000e-01 X	1.25638	1.29218	1.28686	1.11587	0.466087	2.12645	1.55591	1.56824	0.934114	1.36618	2.03323	1.39389	1.89445	1.08016	1.30278	0.834999	1.43676	1.50586	1.03577	2.22098	1.67838	0.741538	1.70743	0.96215	1.92763	2.52144	0.535401	1.06716	1.2921	0.632116	1.11928	1.44078	1.30481	1.36334	1.71657	1.23418	1.36869	2.10207	0.916702	1.46143	0.602715	2.17877	1.46027	0.659371	1.97607	1.3939	0.99899
Cell_0053	FOXO_TR	Glucose 17 mM + Glutamine 2.500000e-01 mM + EAA 1.000000e-01 X	1.74007	1.26261	0.966057	1.16738	1.38658	1.42369	1.10082	1.26977	1.17297	2.59551	1.76244	1.69093	1.95289	1.16135	1.2806	1.43958	1.02312	1.11645	1.93636	1.52477	1.71071	1.24981	1.16911	1.32043	1.79471	1.73737	1.54794	1.2057	1.15106	0.989779	1.18163	1.35826	1.50376	1.18412	1.81745	2.54772	1.41644	1.57997	1.36481	1.4561	1.82763	1.26194	1.25758	1.22402	1.48752	1.65001	2.27669
Cell_0053	AMPKARt2	Glucose 17 mM + Glutamine 2.500000e-01 mM + EAA 1.000000e-01 X	0.581293	0.580237	0.507313	0.730981	0.520896	0.515328	0.707963	0.404633	0.555747	0.558465	0.62091	0.54193	0.554029	0.731306	0.656129	0.537006	0.661443	0.702414	0.460541	0.613574	0.591053	0.445977	0.569042	0.577828	0.766959	0.481167	0.598354	0.464435	0.620527	0.656227	0.703647	0.459772	0.558045	0.642417	0.674099	0.678905	0.551589	0.568995	0.614915	0.603543	0.512762	0.522539	0.562469	0.677387	0.576879	0.427704	0.517087
Cell_0054	TFEB_TR	Glucose 17 mM + Glutamine 2.500000e-01 mM + EAA 1.000000e-01 X	1.13066	1.30129	1.22932	1.17033	0.470961	2.12311	1.60395	1.48133	1.08611	1.39249	1.96404	1.47465	1.92693	1.23129	1.21604	0.879053	1.30696	1.6276	0.892559	2.09025	1.96006	0.804217	1.72365	0.958174	1.71797	2.48843	0.643234	1.06109	1.31999	0.644757	0.986251	1.59399	1.59023	1.46533	1.64292	1.47323	1.36986	2.00411	0.748747	1.45471	0.589274	2.3002	1.39821	0.669534	1.78314	1.36721	1.01743
Cell_0054	FOXO_TR	Glucose 17 mM + Glutamine 2.500000e-01 mM + EAA 1.000000e-01 X	1.71676	1.27783	0.949848	1.16401	1.33057	1.45629	1.11812	1.14331	1.16648	2.67754	1.74117	1.68317	1.97193	1.18658	1.28932	1.49525	1.00461	1.10492	1.87828	1.61687	1.608	1.23352	1.16993	1.31064	1.70402	1.75613	1.5677	1.2083	1.18066	0.983686	1.1547	1.39135	1.58376	1.2143	1.79504	2.31395	1.45973	1.66878	1.34987	1.50734	1.73714	1.30058	1.27168	1.24971	1.45938	1.71014	2.25349
Cell_0054	AMPKARt2	Glucose 17 mM + Glutamine 2.500000e-01 mM + EAA 1.000000e-01 X	0.576038	0.54048	0.512571	0.72254	0.532856	0.502667	0.699007	0.502022	0.563645	0.563783	0.618008	0.544247	0.536231	0.725379	0.647499	0.529911	0.663414	0.701074	0.427907	0.6194	0.60394	0.432957	0.574471	0.589115	0.769827	0.484508	0.596266	0.468227	0.60552	0.656148	0.704726	0.445995	0.526425	0.627606	0.678251	0.668654	0.583877	0.582362	0.637055	0.601218	0.518948	0.495918	0.560471	0.66786	0.5907	0.42238	0.485329
Cell_0055	TFEB_TR	Glucose 17 mM + Glutamine 2.500000e-01 mM + EAA 1.000000e-01 X	0.923966	1.30766	1.31622	1.02232	0.514616	2.07111	1.11587	1.46406	1.34196	1.4015	2.13391	1.56641	1.70809	1.29945	1.29682	0.959521	1.32562	2.03839	0.912707	1.9911	2.01503	0.856682	1.69767	1.01556	1.55148	3.1965	0.625252	1.07889	1.35356	0.655196	0.966304	1.58579	1.97158	1.43234	1.50385	1.65694	1.4631	0.584897	0.783639	1.43105	0.596428	2.40655	1.34578	0.670976	1.71256	1.43691	0.989897
Cell_0055	FOXO_TR	Glucose 17 mM + Glutamine 2.500000e-01 mM + EAA 1.000000e-01 X	1.71709	1.27956	0.978263	1.16937	1.31419	1.39516	1.51115	1.09282	1.10804	2.70874	1.72335	1.5578	1.9389	1.18951	1.38099	1.62705	1.04668	1.10145	1.78561	1.64745	1.45935	1.22303	1.14854	1.35983	1.64858	1.73968	1.55434	1.18344	1.17277	1.00207	1.09477	1.43944	1.61558	1.22029	1.78584	2.09497	1.46915	1.14678	1.27216	1.56173	1.72728	1.305	1.28534	1.23188	1.43345	1.77175	2.1082
Cell_0055	AMPKARt2	Glucose 17 mM + Glutamine 2.500000e-01 mM + EAA 1.000000e-01 X	0.584369	0.498385	0.519601	0.702061	0.521386	0.490794	0.597916	0.546439	0.552947	0.560944	0.614536	0.552301	0.550197	0.72669	0.645632	0.558213	0.66639	0.708439	0.423562	0.622888	0.593875	0.419002	0.565592	0.578957	0.764285	0.492695	0.587444	0.474127	0.607747	0.643709	0.705872	0.439246	0.54639	0.609354	0.685842	0.656104	0.568833	0.562195	0.650826	0.591675	0.507823	0.521248	0.555531	0.66849	0.580241	0.421264	0.367227
Cell_0056	TFEB_TR	Glucose 17 mM + Glutamine 2.500000e-01 mM + EAA 1.000000e-01 X	1.20737	1.34114	1.45227	0.834804	0.590716	2.06443	0.887198	1.38077	1.09595	1.44071	2.30625	1.44471	1.86642	1.25804	1.30435	0.963184	1.35366	1.94649	0.977901	1.86712	1.70936	0.915722	1.61909	0.933515	1.40855	2.90022	0.521137	1.02949	1.34037	0.652721	1.01594	1.50846	1.9358	1.63783	1.58752	1.77855	1.2512	0.626114	0.842585	1.46246	0.630285	2.07806	1.36421	0.670299	1.84821	1.50099	0.959439
Cell_0056	FOXO_TR	Glucose 17 mM + Glutamine 2.500000e-01 mM + EAA 1.000000e-01 X	1.73296	1.27509	1.02062	1.18723	1.30992	1.30829	1.49529	1.0782	1.09488	2.75438	1.67478	1.55077	1.86396	1.18018	1.41904	1.59991	1.08469	1.10229	1.78766	1.59047	1.37534	1.21475	1.1259	1.36797	1.7032	1.72418	1.53793	1.12409	1.13865	1.01369	1.08011	1.47934	1.67329	1.28671	1.76684	2.01605	1.39433	1.16538	1.27466	1.55336	1.77654	1.26273	1.31349	1.19044	1.47525	1.82515	1.99618
Cell_0056	AMPKARt2	Glucose 17 mM + Glutamine 2.500000e-01 mM + EAA 1.000000e-01 X	0.592814	0.477638	0.518484	0.699798	0.506758	0.505132	0.612435	0.51243	0.542802	0.548219	0.622014	0.55303	0.544963	0.730833	0.64444	0.573287	0.675504	0.708152	0.396618	0.627816	0.579354	0.410994	0.558166	0.589227	0.765537	0.483612	0.584539	0.471901	0.613582	0.643257	0.710727	0.459012	0.531638	0.619061	0.691667	0.642323	0.553125	0.566954	0.64823	0.59674	0.492842	0.559097	0.548235	0.666526	0.566509	0.42577	0.30207
Cell_0057	TFEB_TR	Glucose 17 mM + Glutamine 2.500000e-01 mM + EAA 1.000000e-01 X	1.45564	1.45723	1.51209	0.896348	0.642729	2.03565	1.24069	1.26908	0.883181	1.43183	2.038	1.39146	1.90003	1.20278	1.19363	0.981251	1.3659	1.71389	0.930706	1.79906	0.758502	0.996484	1.49631	0.878855	1.18309	1.85368	0.524339	1.03532	1.25445	0.646676	1.12022	1.42398	1.88621	2.09068	1.64858	1.93867	1.17738	0.614515	0.796354	1.58511	0.648616	1.61779	1.37735	0.677539	1.82522	1.53282	1.16052
Cell_0057	FOXO_TR	Glucose 17 mM + Glutamine 2.500000e-01 mM + EAA 1.000000e-01 X	1.68124	1.26345	1.05779	1.17535	1.29427	1.27525	1.38981	1.02388	1.15377	2.7021	1.64483	1.66432	1.81133	1.19378	1.36219	1.49139	1.09478	1.08372	1.78715	1.60576	1.57266	1.20346	1.07284	1.33	1.74901	1.71495	1.57371	1.13447	1.11261	1.0341	1.09177	1.45947	1.80506	1.3749	1.73654	1.95386	1.32016	1.17137	1.31492	1.52434	1.74752	1.23662	1.34105	1.16893	1.53963	1.83483	2.24533
Cell_0057	AMPKARt2	Glucose 17 mM + Glutamine 2.500000e-01 mM + EAA 1.000000e-01 X	0.583974	0.457768	0.506247	0.704171	0.513158	0.510578	0.592362	0.492035	0.549051	0.550643	0.621472	0.543419	0.531196	0.737997	0.6339	0.531187	0.681394	0.696804	0.400828	0.641063	0.649415	0.403972	0.562715	0.606745	0.777093	0.486751	0.587738	0.468961	0.6121	0.640736	0.714658	0.480087	0.489632	0.626941	0.691091	0.639685	0.546641	0.565813	0.637578	0.609632	0.483982	0.561558	0.543104	0.658193	0.570643	0.40508	0.322519
Cell_0058	TFEB_TR	Glucose 17 mM + Glutamine 2.500000e-01 mM + EAA 1.000000e-01 X	1.21487	1.62803	1.49924	1.1588	0.674953	1.9882	1.54488	1.11046	1.08566	1.46382	1.73291	1.34573	1.55153	1.1166	1.16073	1.13088	1.51842	1.66088	1.08618	1.86663	0.80403	1.04169	1.49545	1.03834	1.42352	1.82475	0.584089	1.10651	1.21183	0.655649	1.28168	1.37493	2.02229	2.10038	1.40083	2.0687	1.3324	0.587472	0.785236	1.54636	0.654078	1.6027	1.40873	0.680766	1.60952	1.50126	1.42208
Cell_0058	FOXO_TR	Glucose 17 mM + Glutamine 2.500000e-01 mM + EAA 1.000000e-01 X	1.62446	1.23796	1.0809	1.14002	1.28939	1.26173	1.29808	0.986697	1.20263	2.60159	1.59056	1.70072	1.83251	1.19058	1.33214	1.46122	1.11667	1.05392	1.72469	1.65246	1.60066	1.17412	1.02308	1.35703	1.75239	1.67739	1.55032	1.22924	1.10295	1.06022	1.08281	1.36982	1.83658	1.40758	1.72934	1.88282	1.32265	1.18684	1.31083	1.52428	1.70001	1.24558	1.3609	1.23352	1.50907	1.81418	2.53686
Cell_0058	AMPKARt2	Glucose 17 mM + Glutamine 2.500000e-01 mM + EAA 1.000000e-01 X	0.574027	0.440916	0.499576	0.701227	0.523282	0.496003	0.594072	0.509182	0.547807	0.560576	0.618732	0.542195	0.555961	0.737403	0.626245	0.491309	0.682231	0.69638	0.447721	0.634546	0.665204	0.39831	0.57692	0.586609	0.777979	0.499444	0.599493	0.473287	0.608981	0.63227	0.711475	0.47353	0.478945	0.628543	0.691118	0.639722	0.521271	0.559681	0.63335	0.602093	0.488903	0.559228	0.549167	0.663286	0.572646	0.388163	0.330406
Cell_0059	TFEB_TR	Glucose 17 mM + Glutamine 2.500000e-01 mM + EAA 1.000000e-01 X	1.08373	1.77025	1.47048	1.2925	0.712373	1.97608	1.36947	0.958825	1.19528	1.56507	1.85985	1.37516	1.23711	1.09321	1.21302	1.2793	1.65831	1.79199	1.34611	2.06054	0.785046	1.03544	1.51718	1.12618	1.67143	2.45758	0.579898	1.08533	1.22391	0.635814	1.6398	1.59617	1.70038	1.77317	1.10246	2.10115	1.35035	0.589773	0.827327	1.33268	0.667339	1.84016	1.53816	0.663856	1.55315	1.40207	1.48975
Cell_0059	FOXO_TR	Glucose 17 mM + Glutamine 2.500000e-01 mM + EAA 1.000000e-01 X	1.61147	1.20271	1.06287	1.8722	1.278	1.25014	1.32998	0.985336	1.24981	2.60125	1.49992	1.67587	1.8827	1.14695	1.361	1.40928	1.14285	1.06259	1.61852	1.61225	1.57498	1.14981	1.01022	1.41685	1.74442	1.64273	1.49981	1.26535	1.11622	1.03566	1.12907	1.34961	1.74824	1.41437	1.38972	1.82782	1.33482	1.22261	1.31635	1.51888	1.69447	1.24939	1.37524	1.33815	1.45267	1.80338	2.46694
Cell_0059	AMPKARt2	Glucose 17 mM + Glutamine 2.500000e-01 mM + EAA 1.000000e-01 X	0.578398	0.442524	0.502499	0.660009	0.526075	0.495187	0.624835	0.517354	0.52845	0.552882	0.639443	0.543489	0.581626	0.730822	0.631682	0.496916	0.687929	0.699028	0.469259	0.612513	0.665598	0.396767	0.590732	0.567973	0.77344	0.491433	0.611686	0.481046	0.615198	0.647763	0.708834	0.463834	0.48927	0.634141	0.480244	0.632862	0.512575	0.555809	0.632341	0.596769	0.506507	0.55876	0.567476	0.661133	0.575184	0.408909	0.324661
Cell_0060	TFEB_TR	Glucose 17 mM + Glutamine 2.500000e-01 mM + EAA 1.000000e-01 X	1.108	1.89151	1.48312	1.00752	0.740201	2.0159	1.10044	1.18094	1.13287	1.55959	2.00678	1.73369	1.03581	1.19974	1.19237	1.3353	1.66919	2.19399	1.33094	2.15594	0.75345	1.06234	1.42056	1.01354	1.27473	2.84693	0.546468	1.09926	1.22055	0.575636	1.90097	1.69543	1.31942	1.78525	1.23187	2.16521	1.36803	0.630749	0.808809	1.29246	0.66479	1.97018	1.63981	0.651451	1.66228	1.29224	1.50596
Cell_0060	FOXO_TR	Glucose 17 mM + Glutamine 2.500000e-01 mM + EAA 1.000000e-01 X	1.56843	1.1811	1.03845	1.89755	1.24038	1.30471	1.41423	0.95842	1.31191	2.57496	1.4675	1.69109	1.89181	1.11214	1.3721	1.31888	1.12856	1.11839	1.52463	1.55797	1.53509	1.16349	0.989	1.44252	1.71378	1.66036	1.57428	1.20069	1.14142	0.96165	1.24328	1.46807	1.72441	1.4082	1.40953	1.76262	1.32521	1.26221	1.34558	1.48611	1.62472	1.23673	1.36387	1.38978	1.48195	1.82108	2.2953
Cell_0060	AMPKARt2	Glucose 17 mM + Glutamine 2.500000e-01 mM + EAA 1.000000e-01 X	0.582377	0.435953	0.496019	0.688612	0.526683	0.501504	0.62506	0.52495	0.518788	0.55203	0.671859	0.535999	0.562195	0.739609	0.633298	0.511422	0.697475	0.698369	0.460393	0.603714	0.661477	0.392774	0.581609	0.586625	0.774796	0.47833	0.606169	0.484441	0.63236	0.666427	0.717443	0.463696	0.489909	0.621656	0.48854	0.633848	0.534034	0.559275	0.633042	0.611372	0.518827	0.548717	0.572606	0.637268	0.593618	0.422591	0.33708
Cell_0061	TFEB_TR	Glucose 17 mM + Glutamine 2.500000e-01 mM + EAA 1.000000e-01 X	1.0786	2.05385	1.49409	1.00587	0.764748	2.04085	1.04482	1.43011	1.10355	1.49902	1.81657	1.97257	0.839127	1.32001	1.13226	1.44306	1.68556	0.906009	1.27267	2.04677	0.751044	1.13641	1.377	0.874267	1.29463	3.35252	0.535148	1.16554	1.22835	0.546692	1.88169	1.45443	1.6645	1.93365	1.20089	2.25431	1.44866	0.679036	0.763828	1.4139	0.655836	1.83607	1.51067	0.68203	1.74451	1.3454	1.54625
Cell_0061	FOXO_TR	Glucose 17 mM + Glutamine 2.500000e-01 mM + EAA 1.000000e-01 X	1.5195	1.17683	1.03853	1.87569	1.22704	1.36417	1.43168	0.924827	1.34902	2.4336	1.47974	1.7157	1.85563	1.13978	1.3685	1.29099	1.08869	1.06572	1.49158	1.56456	1.5058	1.19245	0.958106	1.47351	1.71521	1.69277	1.65806	1.15498	1.15587	0.913929	1.31978	1.50019	1.77059	1.38293	1.39498	1.69625	1.32409	1.28863	1.35465	1.46468	1.55175	1.22641	1.36364	1.42088	1.52016	1.85795	2.2211
Cell_0061	AMPKARt2	Glucose 17 mM + Glutamine 2.500000e-01 mM + EAA 1.000000e-01 X	0.58526	0.413791	0.483046	0.673245	0.522558	0.49457	0.605562	0.542436	0.514805	0.565617	0.685432	0.535797	0.520821	0.750055	0.632566	0.512847	0.700529	0.479021	0.460699	0.598105	0.66733	0.392897	0.55217	0.597508	0.770084	0.477323	0.590419	0.4886	0.639939	0.648211	0.729188	0.457081	0.478528	0.601425	0.489013	0.646482	0.536733	0.562843	0.639462	0.621359	0.522065	0.556809	0.555482	0.619245	0.604734	0.420313	0.333396
Cell_0062	TFEB_TR	Glucose 17 mM + Glutamine 2.500000e-01 mM + EAA 1.000000e-01 X	1.37386	2.24659	1.47382	1.15368	0.797515	1.96537	1.15265	1.18369	0.966792	1.50991	1.58501	1.80702	0.77035	1.35902	1.13702	1.58274	1.60033	0.806263	1.26392	2.03904	0.759336	1.16981	1.43291	0.826533	1.94509	3.59733	0.550869	1.07042	1.26008	0.5704	1.87298	1.5625	1.68086	1.77576	1.18456	2.19033	1.35215	0.674518	0.766366	1.41147	0.663362	1.53096	1.36831	0.770303	1.79245	1.48693	1.53985
Cell_0062	FOXO_TR	Glucose 17 mM + Glutamine 2.500000e-01 mM + EAA 1.000000e-01 X	1.53843	1.15096	1.02082	1.86909	1.24083	1.33506	1.37988	0.913124	1.36536	2.35057	1.46854	1.68651	1.82189	1.20188	1.36601	1.2771	1.08082	1.06346	1.44005	1.59729	1.49679	1.18319	0.943214	1.50128	1.74448	1.6906	1.63528	1.17126	1.16663	0.905646	1.34502	1.42422	1.7682	1.36886	1.35651	1.64263	1.31915	1.31037	1.3642	1.45696	1.60939	1.24732	1.39661	1.4525	1.52174	1.88496	2.06349
Cell_0062	AMPKARt2	Glucose 17 mM + Glutamine 2.500000e-01 mM + EAA 1.000000e-01 X	0.601788	0.413157	0.485326	0.653341	0.520018	0.491059	0.608844	0.540155	0.50408	0.553031	0.683419	0.545736	0.49414	0.740257	0.64565	0.515364	0.696867	0.490909	0.470772	0.582567	0.673975	0.393488	0.541618	0.577911	0.761737	0.480883	0.57332	0.501882	0.63174	0.623482	0.733275	0.464949	0.461652	0.602215	0.48839	0.657809	0.527445	0.563692	0.642829	0.624905	0.520572	0.572506	0.549621	0.605353	0.589885	0.440062	0.322032
Cell_0063	TFEB_TR	Glucose 17 mM + Glutamine 2.500000e-01 mM + EAA 1.000000e-01 X	0.752771	2.37606	1.50518	1.26421	0.824659	1.90449	1.21618	1.06605	0.870265	1.51035	1.48962	1.601	1.027	1.38231	1.16027	1.57433	1.40819	0.96837	1.11121	2.10776	0.774456	1.17066	1.44712	0.920635	1.80073	2.88434	0.545976	0.998591	1.27457	0.627296	1.73445	1.27914	0.969821	1.47699	1.19625	2.03426	1.2082	0.655046	0.784119	1.30284	0.666456	1.45784	1.50539	0.910884	1.8566	1.34602	1.56557
Cell_0063	FOXO_TR	Glucose 17 mM + Glutamine 2.500000e-01 mM + EAA 1.000000e-01 X	1.7452	1.10301	0.984249	1.89821	1.23862	1.3295	1.34717	0.886625	1.39486	2.39414	1.45558	1.62839	1.83084	1.21779	1.37864	1.24366	1.09387	1.04868	1.3347	1.63096	1.51333	1.15322	0.926199	1.52462	1.68281	1.67887	1.64201	1.20161	1.18543	0.894042	1.35057	2.15121	1.72853	1.36241	1.3486	1.59554	1.31563	1.35373	1.37655	1.41838	1.72828	1.28336	1.39482	1.42585	1.55802	1.87456	1.84496
Cell_0063	AMPKARt2	Glucose 17 mM + Glutamine 2.500000e-01 mM + EAA 1.000000e-01 X	0.620927	0.427372	0.496483	0.663498	0.526064	0.494696	0.623564	0.532257	0.51038	0.531326	0.687504	0.558112	0.491525	0.734106	0.649241	0.515771	0.689919	0.498235	0.477626	0.565455	0.672192	0.377769	0.557496	0.563583	0.761138	0.493924	0.542809	0.505756	0.628605	0.624701	0.734253	0.546811	0.454871	0.608836	0.495999	0.66758	0.540231	0.571168	0.649366	0.63276	0.497603	0.571459	0.557455	0.585713	0.567543	0.450294	0.336105
Cell_0064	TFEB_TR	Glucose 17 mM + Glutamine 2.500000e-01 mM + EAA 1.000000e-01 X	0.778045	2.3852	1.56687	1.38032	0.853448	1.96917	1.24464	1.34396	1.0762	1.44944	1.39306	1.50455	1.46836	1.42796	1.15726	1.5188	1.45463	1.16129	1.16523	2.03171	0.784746	1.20708	1.39761	1.03269	1.16871	2.15227	0.538342	1.11255	1.2866	0.695341	1.55165	1.26891	1.13711	1.3949	1.07581	1.93786	1.26725	0.688919	0.823431	1.22552	0.688383	1.53991	1.57837	1.04752	1.89513	1.11307	1.62874
Cell_0064	FOXO_TR	Glucose 17 mM + Glutamine 2.500000e-01 mM + EAA 1.000000e-01 X	1.93488	1.08143	0.988433	1.92448	1.24531	1.38527	1.37992	0.861316	1.46444	2.39985	1.45656	1.62898	1.82093	1.19442	1.46325	1.24177	1.08044	1.04204	1.29162	1.66843	1.52899	1.16766	0.907054	1.64959	1.57017	1.6866	1.68435	1.23831	1.20718	0.903823	1.32487	2.00317	1.73101	1.34502	1.37366	1.55892	1.33316	1.38282	1.36169	1.35281	1.86032	1.23609	1.3943	1.34579	1.59216	1.87196	1.73132
Cell_0064	AMPKARt2	Glucose 17 mM + Glutamine 2.500000e-01 mM + EAA 1.000000e-01 X	0.643778	0.415498	0.495823	0.673849	0.529773	0.491358	0.63187	0.545651	0.522602	0.538154	0.698545	0.571426	0.490731	0.741626	0.634943	0.501456	0.682411	0.503128	0.480765	0.548048	0.67244	0.370923	0.571652	0.559277	0.763513	0.506517	0.509409	0.49135	0.624564	0.628196	0.73162	0.574767	0.460991	0.607291	0.508294	0.678712	0.54786	0.575655	0.665194	0.634394	0.455715	0.578824	0.547598	0.580861	0.567061	0.434816	0.349723
Cell_0065	TFEB_TR	Glucose 17 mM + Glutamine 2.500000e-01 mM + EAA 1.000000e-01 X	0.855641	2.38548	1.58471	1.45389	0.879578	2.00152	1.42497	1.3674	1.20482	1.44046	1.30541	1.43861	1.69172	1.37209	0.982298	1.54376	1.65746	1.04347	1.42898	2.13152	0.778025	1.22441	1.32825	1.06096	1.30441	2.33277	0.640079	1.10207	1.31796	0.717558	1.84341	1.21312	1.88587	1.55929	1.00801	1.81808	1.37133	0.711181	0.868055	1.19459	0.761355	1.32655	1.33748	1.14755	1.81802	1.13219	1.66283
Cell_0065	FOXO_TR	Glucose 17 mM + Glutamine 2.500000e-01 mM + EAA 1.000000e-01 X	1.87941	1.08409	1.03112	1.96389	1.26445	1.35249	1.41117	0.876228	1.55948	2.28334	1.47381	1.68657	1.72991	1.20831	1.92728	1.23933	1.07438	1.04746	1.32436	1.71506	1.5558	1.19086	0.908197	1.89832	1.52786	1.68769	1.65848	1.26941	1.22926	0.941505	1.31007	1.98373	1.75471	1.31371	1.38171	1.50165	1.32349	1.36377	1.3542	1.31486	1.98903	1.12634	1.47984	1.28261	1.55142	1.82968	1.69716
Cell_0065	AMPKARt2	Glucose 17 mM + Glutamine 2.500000e-01 mM + EAA 1.000000e-01 X	0.643241	0.39331	0.490416	0.674547	0.526882	0.48993	0.629373	0.552683	0.522942	0.533954	0.701612	0.572478	0.474477	0.743565	0.487744	0.48674	0.68723	0.502022	0.47825	0.533605	0.678503	0.386467	0.571877	0.537511	0.766655	0.502587	0.49854	0.492572	0.613643	0.625604	0.721978	0.575003	0.47302	0.610116	0.511914	0.684943	0.532333	0.56372	0.662205	0.635959	0.432135	0.584504	0.538463	0.583884	0.591736	0.736411	0.345095
Cell_0066	TFEB_TR	Glucose 17 mM + Glutamine 2.500000e-01 mM + EAA 1.000000e-01 X	0.880881	2.5097	1.61086	1.35449	0.868497	1.93269	1.48856	1.36703	1.00008	1.60214	1.32666	1.34143	1.64402	1.28471	1.37427	1.50786	1.75719	0.822988	1.28718	2.35779	0.781593	1.18714	1.33029	1.14218	1.57451	2.86933	0.721552	0.982165	1.33496	0.715908	2.10273	1.19301	1.54838	1.55326	1.14962	1.65159	1.27796	0.717756	0.832922	1.25585	0.845529	1.09928	1.20707	1.26823	1.78301	1.14039	1.71849
Cell_0066	FOXO_TR	Glucose 17 mM + Glutamine 2.500000e-01 mM + EAA 1.000000e-01 X	1.65131	1.07353	1.05339	2.03062	1.26308	1.28769	1.39774	0.90483	1.61141	2.17482	1.53283	1.71426	1.64277	1.24543	1.84627	1.19759	1.11759	1.06964	1.33037	1.75544	1.5787	1.15342	0.925682	2.17782	1.52044	1.66223	1.63684	1.27089	1.24849	0.937905	1.32967	2.04352	1.72126	1.27202	1.377	1.42098	1.2626	1.41525	1.35085	1.31373	1.98471	1.1566	1.55268	1.28069	1.50254	1.83811	1.64428
Cell_0066	AMPKARt2	Glucose 17 mM + Glutamine 2.500000e-01 mM + EAA 1.000000e-01 X	0.630346	0.396893	0.497023	0.683124	0.530033	0.496384	0.611496	0.545691	0.540073	0.500002	0.695798	0.562136	0.466359	0.74658	0.487448	0.491488	0.702182	0.500676	0.475382	0.529146	0.681596	0.382477	0.55707	0.504276	0.76966	0.504928	0.503305	0.513757	0.626004	0.629824	0.718384	0.569325	0.517324	0.61844	0.510522	0.683075	0.523167	0.550853	0.64575	0.641785	0.432398	0.558533	0.556529	0.571297	0.599458	0.738893	0.339129
Cell_0067	TFEB_TR	Glucose 17 mM + Glutamine 2.500000e-01 mM + EAA 1.000000e-01 X	0.864643	2.65694	1.64768	1.24874	0.829757	1.8756	1.23755	1.66761	0.951259	1.78955	1.43114	1.38669	1.45003	1.38988	1.27147	1.41753	1.8688	0.903495	0.971308	2.19045	0.787138	1.21033	1.46396	1.24603	1.28261	2.95517	0.648414	1.09227	0.565603	0.749529	1.82952	1.20399	1.06844	1.35023	1.19905	1.58324	1.14361	0.779259	0.870418	1.3744	0.938357	1.34383	1.31071	1.38837	1.89812	1.24536	1.80028
Cell_0067	FOXO_TR	Glucose 17 mM + Glutamine 2.500000e-01 mM + EAA 1.000000e-01 X	1.53279	1.06035	1.05837	2.07284	1.27268	1.32634	1.39347	0.905222	1.61895	2.14435	1.62637	1.73318	1.61282	1.25413	1.82761	1.1489	1.15473	1.09792	1.2994	1.73682	1.54869	1.13804	0.944195	2.39006	1.50565	1.64805	1.6651	1.2675	1.62289	0.911893	1.33089	2.03741	1.68021	1.27195	1.38709	1.38649	1.22929	1.60165	1.26674	1.30875	1.85617	1.34066	1.53591	1.30014	1.50657	1.83579	1.56767
Cell_0067	AMPKARt2	Glucose 17 mM + Glutamine 2.500000e-01 mM + EAA 1.000000e-01 X	0.621292	0.407811	0.502276	0.685297	0.541699	0.495264	0.584379	0.555897	0.554998	0.475828	0.69856	0.568019	0.473175	0.752377	0.486482	0.500426	0.698545	0.508453	0.481811	0.527882	0.685351	0.367563	0.542476	0.468739	0.768323	0.513898	0.512733	0.517221	0.631518	0.623783	0.72539	0.576511	0.579931	0.616875	0.520504	0.677856	0.528828	0.53827	0.647074	0.629424	0.433576	0.538138	0.5729	0.559283	0.576765	0.74132	0.328761
Cell_0068	TFEB_TR	Glucose 17 mM + Glutamine 2.500000e-01 mM + EAA 1.000000e-01 X	0.981034	2.64222	1.61563	1.26924	0.795632	1.82347	1.11009	1.6415	1.14161	1.78737	1.55521	1.7862	1.10433	1.52294	1.1114	1.42232	1.85446	1.09228	1.04822	1.90986	0.76263	1.29994	1.56191	1.30058	1.24169	2.44926	0.711926	1.26321	0.641372	0.769781	1.64176	1.16575	1.57382	1.40044	1.04712	1.58654	1.15058	0.804183	1.10352	1.37404	1.05798	1.69297	1.30266	1.41365	1.8806	1.36416	1.84291
Cell_0068	FOXO_TR	Glucose 17 mM + Glutamine 2.500000e-01 mM + EAA 1.000000e-01 X	1.52385	1.05307	1.08231	2.04454	1.30025	1.34758	1.36915	0.872503	1.62746	2.07581	1.72843	1.80604	1.58203	1.25759	1.77791	1.12818	1.1369	1.09109	1.27508	1.64898	1.53905	1.22366	0.950547	2.41467	1.52477	1.66753	1.72092	1.28058	1.64117	0.92205	1.32867	1.94731	1.70005	1.32476	1.39477	1.37286	1.26606	1.74807	1.1624	1.30963	1.75146	1.44014	1.53401	1.27343	1.51414	1.81658	1.53335
Cell_0068	AMPKARt2	Glucose 17 mM + Glutamine 2.500000e-01 mM + EAA 1.000000e-01 X	0.614624	0.403383	0.492518	0.67965	0.549785	0.484598	0.545663	0.574181	0.535397	0.457162	0.71426	0.588468	0.468538	0.74703	0.481365	0.494804	0.677991	0.509972	0.491569	0.525658	0.69562	0.382376	0.552276	0.422524	0.769394	0.499565	0.534235	0.50847	0.644297	0.608735	0.728012	0.580981	0.586165	0.603726	0.528618	0.680002	0.53701	0.51288	0.633637	0.616454	0.43804	0.548576	0.575665	0.568409	0.570025	0.748155	0.313955
Cell_0069	TFEB_TR	Glucose 17 mM + Glutamine 2.500000e-01 mM + EAA 1.000000e-01 X	1.09569	2.49852	1.53629	1.17459	0.761484	1.76879	1.18404	1.42507	1.09382	1.72385	1.6602	0.635979	0.847159	1.4651	1.11091	1.44556	1.64615	1.05273	1.20634	1.88854	0.750569	1.31587	1.47955	1.43731	1.63822	1.89373	0.982449	1.23254	0.615172	0.805062	1.5911	1.1076	1.6919	1.48852	1.01734	1.56778	1.1159	0.801435	1.22355	1.29041	1.15403	1.65988	1.2504	1.38669	1.81727	1.2335	1.8384
Cell_0069	FOXO_TR	Glucose 17 mM + Glutamine 2.500000e-01 mM + EAA 1.000000e-01 X	1.44469	1.00609	1.08584	1.97707	1.30025	1.29952	1.27883	0.869415	1.61428	1.95353	1.78893	2.32021	1.56227	1.26882	1.73689	1.15765	1.10701	1.08004	1.2571	1.55975	1.60874	1.29306	0.933575	2.24697	1.61639	1.67452	1.81203	1.28626	1.66708	0.930037	1.35908	1.88429	1.68359	1.34224	1.39408	1.31065	1.31165	1.73337	1.19157	1.34045	1.68359	1.40294	1.5047	1.22455	1.51709	1.75799	1.53702
Cell_0069	AMPKARt2	Glucose 17 mM + Glutamine 2.500000e-01 mM + EAA 1.000000e-01 X	0.607278	0.398588	0.49101	0.674481	0.555601	0.482995	0.502352	0.578735	0.532576	0.432269	0.724097	0.495881	0.46196	0.746196	0.486158	0.490589	0.673038	0.503736	0.503126	0.530305	0.69576	0.392424	0.56906	0.39647	0.77483	0.489233	0.552416	0.515827	0.648425	0.621289	0.725062	0.579802	0.560306	0.605801	0.526847	0.688868	0.547906	0.498843	0.594392	0.634631	0.446261	0.557624	0.523395	0.583292	0.57888	0.750605	0.322734
Cell_0070	TFEB_TR	Glucose 17 mM + Glutamine 2.500000e-01 mM + EAA 1.000000e-01 X	0.998602	2.42069	1.49278	0.936275	0.725724	1.7397	1.42317	1.67591	1.01008	1.69361	1.73271	0.642781	1.02708	1.4141	1.10262	1.43624	1.66795	0.985093	1.16987	1.85367	0.793826	1.29229	1.37572	1.55717	1.59763	1.85884	1.10121	1.18927	0.623205	0.935466	1.41362	1.13213	1.14157	1.3238	1.15512	1.57899	1.03882	0.919435	1.21266	1.2711	1.2346	1.47655	1.10972	1.38606	1.94211	0.982916	1.84699
Cell_0070	FOXO_TR	Glucose 17 mM + Glutamine 2.500000e-01 mM + EAA 1.000000e-01 X	1.36012	0.935003	1.04668	1.92019	1.28543	1.29473	1.25588	0.936932	1.56761	1.89895	1.77495	2.31435	1.5686	1.26962	1.82597	1.20675	1.11026	1.10812	1.23418	1.51556	1.71491	1.2704	0.908986	2.09476	1.76951	1.6512	1.82148	1.28466	1.70363	0.931313	1.37089	1.89243	1.61993	1.3249	1.4051	1.26255	1.32127	1.6307	1.27902	1.3385	1.6144	1.38225	1.4774	1.19469	1.58049	1.71063	1.5177
Cell_0070	AMPKARt2	Glucose 17 mM + Glutamine 2.500000e-01 mM + EAA 1.000000e-01 X	0.609617	0.396188	0.504759	0.644392	0.569008	0.493336	0.488508	0.582549	0.562597	0.429736	0.719263	0.482408	0.474962	0.754254	0.499309	0.491754	0.679094	0.515659	0.516759	0.539429	0.67359	0.377276	0.569492	0.417068	0.774739	0.511814	0.544838	0.529337	0.641057	0.644691	0.728346	0.578579	0.580758	0.628905	0.547804	0.690286	0.552986	0.50105	0.594206	0.648351	0.446918	0.552026	0.558193	0.582833	0.575158	0.741329	0.358607
Cell_0071	TFEB_TR	Glucose 17 mM + Glutamine 2.500000e-01 mM + EAA 1.000000e-01 X	0.95767	2.49405	1.50703	0.923264	0.703862	1.68618	2.21963	1.92944	1.20808	1.61761	1.81768	0.631149	1.50759	1.4424	1.2044	1.48388	1.77462	1.00569	1.12033	1.86918	0.863832	1.32623	1.4173	1.60383	1.25931	0.664459	1.08221	1.18118	0.667195	1.02088	1.59605	1.23828	1.47597	1.25677	1.19941	1.59527	1.10965	1.01393	1.49369	1.22493	1.33585	1.47685	1.09405	1.37417	1.86484	0.957115	1.87552
Cell_0071	FOXO_TR	Glucose 17 mM + Glutamine 2.500000e-01 mM + EAA 1.000000e-01 X	1.35039	0.934696	1.03615	1.84165	1.283	1.28011	1.34688	0.987792	1.49487	1.88485	1.77587	2.13082	1.53428	1.26683	1.94536	1.21194	1.13694	1.11754	1.23043	1.48758	1.83466	1.25643	0.908835	2.09663	1.86408	1.1684	1.7222	1.31208	1.72437	0.955659	1.36167	1.90034	1.6362	1.34948	1.42144	1.25185	1.29998	1.50876	1.29681	1.29295	1.54986	1.38232	1.46161	1.1665	1.65664	1.74884	1.49062
Cell_0071	AMPKARt2	Glucose 17 mM + Glutamine 2.500000e-01 mM + EAA 1.000000e-01 X	0.622628	0.389032	0.507525	0.604727	0.577249	0.49731	0.495862	0.587655	0.572553	0.447288	0.710406	0.460864	0.492068	0.747796	0.496515	0.482416	0.678073	0.536593	0.51314	0.538849	0.651598	0.380788	0.567733	0.440856	0.773639	0.545271	0.532994	0.536832	0.63748	0.638275	0.731879	0.575507	0.604617	0.635346	0.579002	0.690838	0.543288	0.482064	0.629793	0.634315	0.451525	0.541099	0.55888	0.575578	0.584166	0.735273	0.387215
Cell_0072	TFEB_TR	Glucose 17 mM + Glutamine 2.500000e-01 mM + EAA 1.000000e-01 X	1.11975	2.61855	1.52364	1.16846	0.69221	1.66967	2.76741	1.74237	1.26858	1.62887	1.91746	0.619622	1.73934	1.33974	1.34903	1.51166	1.6579	0.922235	1.08084	2.04891	0.941652	1.32823	1.51068	1.70764	1.51907	0.60454	1.10252	1.09277	0.617738	0.966316	1.85202	1.29787	2.21161	1.35137	1.14364	1.55578	1.15713	0.980188	1.84314	1.1621	1.38551	1.55673	1.12296	1.32962	1.55382	1.01204	1.78241
Cell_0072	FOXO_TR	Glucose 17 mM + Glutamine 2.500000e-01 mM + EAA 1.000000e-01 X	1.34124	0.989462	1.05928	1.72121	1.29164	1.21871	1.40331	0.976881	1.41115	1.81276	1.8488	1.92392	1.47663	1.25498	2.03439	1.19854	1.15981	1.09994	1.26748	1.44488	1.84943	1.27808	0.924421	2.14772	1.83455	1.10131	1.69554	1.347	1.64789	0.953121	1.39537	1.85615	1.66293	1.3708	1.42456	1.21439	1.26913	1.40808	1.33447	1.31477	1.47247	1.34865	1.46594	1.16462	1.61477	1.83866	1.44758
Cell_0072	AMPKARt2	Glucose 17 mM + Glutamine 2.500000e-01 mM + EAA 1.000000e-01 X	0.623468	0.390999	0.506306	0.588765	0.564963	0.496641	0.488918	0.585701	0.570709	0.459818	0.701999	0.445496	0.500792	0.740097	0.492629	0.479542	0.681347	0.539379	0.502918	0.528858	0.646523	0.395524	0.569418	0.434442	0.780325	0.545232	0.545054	0.538483	0.649716	0.632839	0.724809	0.591365	0.584601	0.616351	0.562433	0.697392	0.534264	0.456283	0.638526	0.631077	0.464136	0.531641	0.550984	0.584428	0.599858	0.738922	0.39273
Cell_0073	TFEB_TR	Glucose 17 mM + Glutamine 2.500000e-01 mM + EAA 1.000000e-01 X	1.13459	2.70168	1.48903	1.20734	0.687143	1.71637	2.15944	1.5543	1.19823	1.674	1.94515	0.607145	1.60098	1.19901	1.37489	1.44848	1.72548	0.875409	1.26646	2.07805	1.05026	1.2809	1.52234	1.62534	2.02067	0.659677	1.03544	1.15646	0.590897	0.921612	1.60459	1.31224	1.86074	1.4475	1.1316	1.60759	1.12641	1.05477	1.78753	0.892969	1.388	1.51522	1.11396	1.28876	1.49837	1.01416	1.61012
Cell_0073	FOXO_TR	Glucose 17 mM + Glutamine 2.500000e-01 mM + EAA 1.000000e-01 X	1.35073	1.00184	1.04663	1.63699	1.34208	1.20957	1.42587	0.972997	2.55491	1.73584	1.91574	1.782	1.44781	1.23655	2.16561	1.21564	1.16363	1.13764	1.2772	1.40887	1.69185	1.27023	0.915438	2.10746	1.80143	1.10367	1.71197	1.36032	1.54114	0.92521	1.45118	1.80282	1.58028	1.3552	1.4141	1.21792	1.26693	1.36722	1.4141	1.52438	1.40954	1.34542	1.44841	1.21454	1.5057	1.89685	1.35458
Cell_0073	AMPKARt2	Glucose 17 mM + Glutamine 2.500000e-01 mM + EAA 1.000000e-01 X	0.613723	0.396239	0.518185	0.558355	0.546501	0.499374	0.483326	0.586395	0.668574	0.467172	0.693054	0.459661	0.50783	0.748664	0.51064	0.492076	0.682577	0.529086	0.513591	0.521734	0.639047	0.38774	0.571732	0.417012	0.78357	0.567392	0.56489	0.52463	0.657911	0.653155	0.720843	0.609695	0.572862	0.603694	0.510018	0.691297	0.531049	0.454821	0.629484	0.619256	0.471993	0.537457	0.552451	0.604471	0.585608	0.741751	0.391358
Cell_0074	TFEB_TR	Glucose 17 mM + Glutamine 2.500000e-01 mM + EAA 1.000000e-01 X	0.977013	2.73774	1.43014	0.982519	0.709208	1.65968	1.79378	1.56712	1.17258	1.50804	1.92168	0.594926	1.5535	1.24021	1.40292	1.40922	1.8993	0.98278	1.75574	2.07867	1.20813	1.29979	1.48787	1.43258	1.76797	0.654851	0.96673	1.38237	0.675047	0.923951	1.5531	1.35524	1.19921	1.48831	1.13871	1.83261	1.23152	1.2052	1.67913	1.12796	1.43528	1.3764	1.13545	1.23627	1.63885	1.13767	1.62618
Cell_0074	FOXO_TR	Glucose 17 mM + Glutamine 2.500000e-01 mM + EAA 1.000000e-01 X	1.40963	0.987471	1.02109	1.60673	1.44743	1.19402	1.48241	0.977978	2.63217	1.70512	1.96407	1.69843	1.4092	1.23838	2.22679	1.23419	1.1875	1.21307	1.22671	1.39515	1.59391	1.25577	0.893461	2.0093	1.80577	1.12756	1.63842	1.3889	1.55417	0.933393	1.4865	1.80288	1.47015	1.36711	1.40189	1.32514	1.27562	1.35678	1.44353	1.50199	1.38664	1.36926	1.41415	1.24221	1.47631	1.86528	1.30041
Cell_0074	AMPKARt2	Glucose 17 mM + Glutamine 2.500000e-01 mM + EAA 1.000000e-01 X	0.610336	0.386983	0.522042	0.503237	0.541772	0.487245	0.489826	0.584489	0.687752	0.469938	0.693788	0.482861	0.515793	0.745634	0.515183	0.492347	0.666946	0.511394	0.515861	0.519143	0.619582	0.38591	0.585281	0.404759	0.780655	0.585282	0.570158	0.503897	0.64773	0.658219	0.729998	0.570084	0.58447	0.606824	0.477613	0.681946	0.523898	0.451623	0.632821	0.623818	0.475813	0.554575	0.547646	0.610015	0.571201	0.744837	0.392309
Cell_0075	TFEB_TR	Glucose 17 mM + Glutamine 2.500000e-01 mM + EAA 1.000000e-01 X	0.953695	2.72052	1.39983	1.09144	0.769602	1.57988	2.32015	1.67487	1.26816	1.31158	1.92359	0.603991	1.51184	1.31971	1.33559	1.40987	1.75401	0.977258	1.79736	2.20673	1.38085	1.34376	1.3271	1.60685	1.09	0.592165	1.09206	1.33443	0.706971	0.881666	1.88641	1.34069	1.26992	1.3057	1.11561	2.0197	1.31187	1.17556	1.7979	1.06704	1.457	1.33844	1.17241	1.14019	1.72836	1.19959	1.7454
Cell_0075	FOXO_TR	Glucose 17 mM + Glutamine 2.500000e-01 mM + EAA 1.000000e-01 X	1.43654	0.98411	1.02527	1.57269	1.5463	1.12545	1.49864	0.973007	2.69557	1.64624	2.02493	1.73224	1.37401	1.25198	2.19751	1.24849	1.27992	1.22498	1.25342	1.3835	1.65649	1.26149	1.98686	1.99893	1.76293	1.12302	1.57034	1.39142	1.58883	0.942981	1.51401	1.83435	1.39043	1.37377	1.40373	1.42649	1.24987	1.33467	1.49034	1.44354	1.34046	1.36403	1.41453	1.20871	1.49815	1.79929	1.31928
Cell_0075	AMPKARt2	Glucose 17 mM + Glutamine 2.500000e-01 mM + EAA 1.000000e-01 X	0.585264	0.384196	0.511745	0.472512	0.549679	0.480496	0.485627	0.573623	0.687685	0.465766	0.705048	0.486088	0.518285	0.729203	0.497635	0.488574	0.66274	0.490286	0.493818	0.520775	0.605481	0.403824	0.644852	0.411825	0.784511	0.576998	0.571326	0.500373	0.646067	0.642732	0.731771	0.516785	0.590717	0.610868	0.472496	0.689979	0.525872	0.446458	0.639472	0.633074	0.470286	0.561277	0.539247	0.602499	0.578	0.744947	0.392148
Cell_0076	TFEB_TR	Glucose 17 mM + Glutamine 2.500000e-01 mM + EAA 1.000000e-01 X	0.932963	2.7192	1.40485	1.53437	0.848789	1.66884	2.14456	1.86573	1.39405	1.27158	1.87774	0.615648	1.06951	1.28092	1.14946	1.39891	1.72113	0.883156	1.36702	2.12475	1.49849	1.33214	1.77395	1.76593	0.894228	0.65584	1.20148	1.08371	0.681278	0.847725	1.82976	1.34316	1.54852	1.14859	1.0864	2.04965	1.2409	1.08702	1.82032	1.04719	1.39106	1.45808	1.14283	1.0354	1.74106	1.05619	1.71859
Cell_0076	FOXO_TR	Glucose 17 mM + Glutamine 2.500000e-01 mM + EAA 1.000000e-01 X	1.4238	0.968774	1.01841	1.54429	1.57878	1.132	1.50185	0.988599	2.85187	1.55038	2.06782	1.77584	1.38691	1.27013	2.2764	1.27196	1.35481	1.15367	1.38874	1.37685	1.70511	1.24705	1.97833	2.08594	1.68945	1.13983	1.55883	1.32089	1.62106	0.919314	1.50996	1.81929	1.33617	1.35826	1.4145	1.45983	1.2413	1.30488	1.57763	1.40145	1.28863	1.3823	1.43644	1.19012	1.52506	1.84285	1.30523
Cell_0076	AMPKARt2	Glucose 17 mM + Glutamine 2.500000e-01 mM + EAA 1.000000e-01 X	0.535007	0.398465	0.506451	0.460565	0.554404	0.51089	0.490917	0.574925	0.688177	0.463673	0.702676	0.48912	0.509621	0.734872	0.525466	0.50553	0.680437	0.488846	0.483366	0.523651	0.603493	0.403028	0.653037	0.44299	0.786113	0.569263	0.574505	0.511221	0.657684	0.641103	0.719305	0.532215	0.599528	0.610823	0.469069	0.694275	0.538527	0.464422	0.645399	0.64004	0.465553	0.55642	0.544148	0.604038	0.578375	0.729238	0.392538
Cell_0077	TFEB_TR	Glucose 17 mM + Glutamine 2.500000e-01 mM + EAA 1.000000e-01 X	0.854145	2.85061	1.41002	1.55441	0.925496	0.547975	1.38549	1.90144	1.39407	1.28141	1.81677	0.61221	0.921933	1.25959	1.18276	1.4159	1.96047	0.928989	1.47047	1.94581	1.56493	1.32891	1.79569	1.59317	1.02428	0.740626	1.09713	1.07208	0.715845	0.90985	1.46454	1.51091	1.68994	1.26733	1.0345	2.09077	1.14211	1.11053	1.84432	1.21443	1.33504	1.53171	1.13685	0.975034	1.65079	1.02659	1.67464
Cell_0077	FOXO_TR	Glucose 17 mM + Glutamine 2.500000e-01 mM + EAA 1.000000e-01 X	1.43503	0.987423	0.989644	1.52995	1.53962	1.32033	1.56428	0.996036	2.98305	1.51858	2.12964	1.72948	1.37519	1.29815	2.39338	1.25384	1.31319	1.08218	1.45701	1.38275	1.73316	1.21694	1.89844	2.12325	1.64107	1.16161	1.53018	1.30273	1.8077	0.917938	1.46498	1.74354	1.36814	1.40875	1.40554	1.45678	1.18276	1.2901	1.57347	1.45619	1.30145	1.42026	1.4559	1.21078	1.60109	1.95637	1.25979
Cell_0077	AMPKARt2	Glucose 17 mM + Glutamine 2.500000e-01 mM + EAA 1.000000e-01 X	0.518605	0.403173	0.506087	0.445373	0.543421	0.646127	0.524971	0.581817	0.698022	0.472696	0.681381	0.497607	0.499851	0.753445	0.594174	0.520053	0.681194	0.506433	0.47679	0.518333	0.604546	0.387791	0.657048	0.461886	0.778988	0.578728	0.566438	0.522431	0.645371	0.647062	0.714312	0.564242	0.608465	0.617966	0.455161	0.692657	0.627929	0.4759	0.647698	0.64001	0.496798	0.550721	0.554657	0.615458	0.581045	0.706059	0.395113
Cell_0078	TFEB_TR	Glucose 17 mM + Glutamine 2.500000e-01 mM + EAA 1.000000e-01 X	1.068	3.03197	1.39285	1.19846	0.987868	0.549515	1.40129	1.70068	1.45798	1.29041	1.91399	0.614446	1.62758	1.35277	1.33681	1.44728	1.91239	0.979391	1.71726	1.90031	1.63346	1.39388	1.56563	1.71462	1.0196	0.712135	0.909654	1.23521	0.739896	0.992544	1.2521	1.62186	1.743	1.25895	1.00783	2.184	1.01174	1.12419	2.0321	1.27736	1.2975	1.50717	1.20946	0.942499	1.62684	1.04592	1.71794
Cell_0078	FOXO_TR	Glucose 17 mM + Glutamine 2.500000e-01 mM + EAA 1.000000e-01 X	1.44703	1.06572	0.984882	1.51578	1.46604	1.33911	1.56039	0.993056	2.9001	1.54709	2.23247	1.73013	1.30106	1.31606	2.37751	1.22524	1.25718	1.08268	1.43692	1.37099	1.77806	1.2191	1.82782	2.07615	1.63318	1.11704	1.50839	1.37465	1.91338	0.945322	1.44905	1.6683	1.45239	1.4318	1.38316	1.40801	1.12873	1.30393	1.49991	1.5528	1.30747	1.38644	1.45337	1.18868	1.65135	1.98831	1.25989
Cell_0078	AMPKARt2	Glucose 17 mM + Glutamine 2.500000e-01 mM + EAA 1.000000e-01 X	0.531492	0.395114	0.507805	0.444919	0.527036	0.632272	0.544803	0.571908	0.70041	0.490975	0.670069	0.488053	0.496304	0.756431	0.60097	0.513398	0.665458	0.515039	0.459354	0.524871	0.600057	0.3914	0.661911	0.454968	0.780989	0.582595	0.559725	0.528015	0.622687	0.64868	0.721475	0.55513	0.606601	0.629956	0.450238	0.703805	0.65578	0.463484	0.642432	0.64398	0.537745	0.551143	0.549914	0.623418	0.597739	0.68752	0.401458
Cell_0079	TFEB_TR	Glucose 17 mM + Glutamine 2.500000e-01 mM + EAA 1.000000e-01 X	1.28686	3.05953	1.3867	1.21533	1.0198	0.544622	1.62954	1.61562	1.64565	1.22982	2.01443	0.624738	1.97169	1.41823	1.30814	1.52385	1.65478	0.950693	1.3002	0.686015	1.68499	1.50312	1.48758	2.0598	1.02761	0.689906	0.823831	1.33714	0.719356	0.969959	1.28165	1.61679	1.67392	1.06773	1.10676	2.17312	1.16425	1.10141	1.94799	1.18987	1.23356	1.51507	1.26708	0.891063	1.7755	0.956973	1.72602
Cell_0079	FOXO_TR	Glucose 17 mM + Glutamine 2.500000e-01 mM + EAA 1.000000e-01 X	1.42261	1.10169	1.01467	1.5311	1.41429	1.34867	1.46431	1.0255	2.76179	1.52811	2.28344	1.84298	1.26313	1.3321	2.29709	1.30261	1.28342	1.10344	1.45047	2.07868	1.73768	1.25349	1.8009	2.02313	1.67223	1.08378	1.51256	1.40441	1.73528	0.944858	1.47637	1.64394	1.47746	1.33767	1.38268	1.35404	1.1319	1.31025	1.46627	1.57237	1.2644	1.32198	1.42488	1.11989	1.63842	1.97086	1.27704
Cell_0079	AMPKARt2	Glucose 17 mM + Glutamine 2.500000e-01 mM + EAA 1.000000e-01 X	0.515939	0.388039	0.519379	0.454764	0.5233	0.640146	0.539797	0.573977	0.693703	0.500222	0.675085	0.47646	0.497408	0.754118	0.541228	0.505944	0.669824	0.509476	0.463863	0.606881	0.592138	0.392193	0.66122	0.457164	0.784899	0.57665	0.575242	0.521137	0.626471	0.651292	0.726909	0.541936	0.609645	0.626451	0.474382	0.702129	0.65535	0.45059	0.643138	0.647759	0.538308	0.561017	0.541144	0.628077	0.601743	0.672882	0.410195
Cell_0080	TFEB_TR	Glucose 17 mM + Glutamine 2.500000e-01 mM + EAA 1.000000e-01 X	1.06459	2.93884	1.38891	1.55535	1.02692	0.540361	1.39505	1.66173	1.56749	1.19714	1.91927	0.647064	1.36032	1.30236	1.28126	1.70242	1.6306	0.993764	1.23087	0.724836	1.69432	1.56686	1.5647	1.97994	1.10849	0.684771	0.904489	1.36008	0.743824	0.931264	1.56387	1.73017	1.82778	1.0523	1.18167	2.12872	1.42985	1.13682	1.69407	1.10757	1.19723	1.48551	1.31005	0.860468	1.87441	1.15411	1.76643
Cell_0080	FOXO_TR	Glucose 17 mM + Glutamine 2.500000e-01 mM + EAA 1.000000e-01 X	1.39138	1.06447	1.03821	1.54303	1.40174	1.35485	1.45326	1.02877	2.74148	1.4798	2.28161	2.05754	1.30279	1.34744	2.19361	1.42384	1.31517	1.06116	1.48338	2.12234	1.67055	1.26967	1.80766	1.96326	1.68354	1.10662	1.49718	1.40262	1.65902	0.935516	1.50534	1.64639	1.45958	1.34989	1.37954	1.37199	1.14371	1.27889	1.45254	1.54895	1.26125	1.32822	1.44837	1.1013	1.69818	1.97469	1.28357
Cell_0080	AMPKARt2	Glucose 17 mM + Glutamine 2.500000e-01 mM + EAA 1.000000e-01 X	0.491707	0.382317	0.536956	0.459852	0.52878	0.649816	0.54823	0.600673	0.686102	0.494072	0.678676	0.481224	0.512859	0.754074	0.511028	0.511761	0.681889	0.504072	0.47956	0.613693	0.592632	0.372887	0.652154	0.466999	0.777912	0.579864	0.594124	0.50979	0.620524	0.644871	0.725179	0.538826	0.613962	0.623153	0.501624	0.681522	0.637015	0.441938	0.64618	0.64223	0.526056	0.56526	0.555509	0.636874	0.594246	0.664317	0.404944
Cell_0081	TFEB_TR	Glucose 17 mM + Glutamine 2.500000e-01 mM + EAA 1.000000e-01 X	0.988597	2.85803	0.701626	1.61012	1.04552	0.541938	1.38088	1.63473	1.33488	1.35919	1.93029	0.694958	1.25735	1.13832	1.36811	1.78893	1.76223	1.04869	1.76515	0.764834	1.69614	1.51659	1.60412	1.74312	1.16308	0.643339	0.999646	1.30201	0.887928	1.0518	1.78665	1.78613	2.02207	0.953411	1.07185	2.17307	1.47387	1.15168	1.89131	1.06522	1.19424	1.42632	1.34672	0.884557	1.78367	1.43076	1.8851
Cell_0081	FOXO_TR	Glucose 17 mM + Glutamine 2.500000e-01 mM + EAA 1.000000e-01 X	1.34765	1.03621	1.86602	1.51034	1.41185	1.37799	1.51298	0.980964	2.73657	1.48834	2.30311	2.37346	1.3336	1.32261	2.0571	1.44282	1.3321	1.00094	1.50427	2.2186	1.67406	1.23969	1.84222	1.91789	1.62619	1.09013	1.47835	1.45715	1.80826	0.976359	1.53599	1.59976	1.44822	1.94659	1.32895	1.41648	1.1216	1.27528	1.43161	1.55467	1.29153	1.38404	1.51657	1.1097	1.782	1.95777	1.31043
Cell_0081	AMPKARt2	Glucose 17 mM + Glutamine 2.500000e-01 mM + EAA 1.000000e-01 X	0.498248	0.384123	0.641722	0.474649	0.534221	0.646531	0.557349	0.604028	0.684671	0.49938	0.682642	0.4771	0.52806	0.75023	0.512962	0.521959	0.678469	0.503817	0.471971	0.605815	0.59894	0.372898	0.648865	0.466908	0.780411	0.591101	0.599461	0.505016	0.583037	0.637579	0.721425	0.533611	0.606928	0.550108	0.506767	0.680419	0.633948	0.445992	0.638511	0.646123	0.529713	0.554793	0.570443	0.644429	0.592829	0.654828	0.392681
Cell_0082	TFEB_TR	Glucose 17 mM + Glutamine 2.500000e-01 mM + EAA 1.000000e-01 X	1.35003	2.85766	0.698793	1.31328	1.08159	0.54557	1.76425	1.73517	1.44637	1.37632	2.20945	0.735168	1.93398	1.15542	1.30384	1.72892	1.83139	1.0383	1.62473	0.800464	1.70416	1.45796	1.5091	1.73246	1.34151	0.682953	0.935454	1.26919	1.20411	1.21076	1.76178	1.64938	1.76072	0.992898	0.972196	2.13882	1.25986	1.07629	2.2605	1.03778	1.17416	1.54427	1.3415	0.864652	1.61739	1.16025	1.89333
Cell_0082	FOXO_TR	Glucose 17 mM + Glutamine 2.500000e-01 mM + EAA 1.000000e-01 X	1.26894	1.03746	1.87211	1.50258	1.45849	1.41938	1.48203	0.987416	2.70815	1.48993	2.33415	2.56122	1.33145	1.29322	1.92957	1.413	1.37547	0.988322	1.54555	2.27021	1.66912	1.20321	1.85958	1.94964	1.6108	1.08206	1.47137	1.51341	1.82136	1.03436	1.541	1.51521	1.41656	1.84761	1.28072	1.42032	1.12931	1.33312	1.43196	1.52228	1.26974	1.40451	1.5161	1.06241	1.7397	1.89999	1.33836
Cell_0082	AMPKARt2	Glucose 17 mM + Glutamine 2.500000e-01 mM + EAA 1.000000e-01 X	0.507532	0.390279	0.652267	0.496663	0.5371	0.645644	0.545604	0.579633	0.700392	0.518823	0.684501	0.453299	0.516589	0.753131	0.49329	0.524011	0.680294	0.503462	0.465294	0.605744	0.604397	0.400628	0.655454	0.481945	0.787001	0.595894	0.600933	0.504498	0.564021	0.644706	0.72152	0.529347	0.602981	0.548436	0.508553	0.688829	0.649926	0.464414	0.633225	0.659124	0.53119	0.551716	0.553594	0.638676	0.58818	0.637059	0.406641
Cell_0083	TFEB_TR	Glucose 17 mM + Glutamine 2.500000e-01 mM + EAA 1.000000e-01 X	1.43348	2.83337	0.710319	1.01234	1.09943	0.550579	1.85903	1.9248	1.57393	1.1664	2.34217	0.750532	2.06123	1.25885	1.06828	1.80902	0.633879	1.0656	1.20918	0.784085	1.68881	1.51038	1.3781	1.70792	1.46714	0.762659	0.833695	1.3317	1.50577	1.26631	1.79343	1.66322	1.58057	0.945198	1.00534	2.00007	1.17557	1.00428	2.21206	0.990922	1.13575	1.67169	1.401	0.806385	1.5561	0.865409	1.84747
Cell_0083	FOXO_TR	Glucose 17 mM + Glutamine 2.500000e-01 mM + EAA 1.000000e-01 X	1.2236	1.04368	1.98701	1.52123	1.52851	1.44439	1.38637	1.01895	2.71059	1.43463	2.32828	2.4579	1.39267	1.30596	1.81714	1.42506	1.17992	0.991548	1.56134	2.18112	1.65713	1.20322	1.88836	1.95596	1.64207	1.16804	1.43206	1.49768	1.7002	1.03826	1.49658	1.47863	1.35775	1.76775	1.29471	1.41609	1.17781	1.35441	1.47312	1.44398	1.21421	1.3667	1.46002	1.05786	1.7159	1.8273	1.33364
Cell_0083	AMPKARt2	Glucose 17 mM + Glutamine 2.500000e-01 mM + EAA 1.000000e-01 X	0.500545	0.384142	0.650037	0.503124	0.530182	0.652811	0.549469	0.576296	0.716032	0.518071	0.673739	0.433712	0.505778	0.760719	0.485715	0.521374	0.596851	0.499278	0.474985	0.615291	0.620191	0.412789	0.661368	0.503437	0.774447	0.583433	0.597305	0.516063	0.570891	0.638964	0.719415	0.518877	0.60282	0.550792	0.511913	0.680213	0.655653	0.466841	0.637222	0.661705	0.533469	0.563754	0.532728	0.625122	0.588157	0.62816	0.425893
Cell_0084	TFEB_TR	Glucose 17 mM + Glutamine 2.500000e-01 mM + EAA 1.000000e-01 X	1.12596	2.78755	0.712075	0.9428	1.09076	0.560905	1.49813	1.83138	1.23303	1.25128	2.15938	0.77912	1.83199	1.21798	1.04783	1.97512	0.785513	1.09371	1.41796	0.72099	1.60442	1.57561	1.48198	1.5753	1.23604	0.722423	0.818531	1.3545	1.59367	1.37559	1.82527	1.79579	1.70295	0.898461	1.01488	1.98267	1.34618	0.966665	1.94697	1.0013	1.10291	1.53495	1.55353	0.869396	1.5377	1.09989	1.9311
Cell_0084	FOXO_TR	Glucose 17 mM + Glutamine 2.500000e-01 mM + EAA 1.000000e-01 X	1.24469	1.05449	2.00117	1.49985	1.56181	1.45691	1.3267	0.990984	2.70817	1.43273	2.27742	2.28372	1.50147	1.30373	1.77003	1.42799	1.2105	0.991321	1.53326	2.02841	1.66109	1.2228	1.91185	1.83818	1.5932	1.23766	1.38942	1.45393	1.64893	0.995235	1.49093	1.45985	1.31509	1.70624	1.32599	1.43878	1.19389	1.29681	1.55301	1.43937	1.18981	1.32312	1.39222	1.16465	1.80965	1.76265	1.30863
Cell_0084	AMPKARt2	Glucose 17 mM + Glutamine 2.500000e-01 mM + EAA 1.000000e-01 X	0.502299	0.380329	0.650729	0.513564	0.517398	0.661641	0.573034	0.591078	0.701288	0.506081	0.669653	0.432301	0.520968	0.75693	0.521206	0.527063	0.569155	0.501119	0.477119	0.619298	0.641273	0.397738	0.659648	0.495537	0.767393	0.554237	0.59338	0.531828	0.573453	0.620905	0.713921	0.507958	0.597372	0.560686	0.503884	0.679186	0.649972	0.45801	0.643582	0.661212	0.540406	0.571324	0.53032	0.618877	0.609196	0.640007	0.411866
Cell_0085	TFEB_TR	Glucose 17 mM + Glutamine 2.500000e-01 mM + EAA 1.000000e-01 X	0.99386	2.72018	0.703202	1.11993	1.08595	0.574752	1.25952	1.63112	1.05178	1.48896	1.99906	0.822785	1.74795	1.04756	1.29699	1.94147	0.747778	1.06216	1.47056	0.697041	1.4576	1.54588	1.65172	1.48511	1.15038	0.677173	0.813832	1.34832	1.70895	1.54043	0.794693	1.72502	1.51141	0.897216	0.962822	2.02476	1.31592	0.913611	1.76503	1.10659	1.10706	1.36598	1.63638	0.990728	1.43432	1.21649	1.9928
Cell_0085	FOXO_TR	Glucose 17 mM + Glutamine 2.500000e-01 mM + EAA 1.000000e-01 X	1.2432	1.06441	1.93422	1.49558	1.5742	1.505	1.28406	0.974028	2.73629	1.49588	2.25779	2.19043	1.50911	1.27331	1.77885	1.41489	1.18942	1.00491	1.53841	1.98072	1.59566	1.2325	1.83994	1.72754	1.51293	1.23453	1.43756	1.45874	1.60128	0.968092	1.27323	1.39712	1.31724	1.64979	1.33079	1.4828	1.18904	1.25618	1.61849	1.49424	1.19859	1.30215	1.29686	1.23068	1.80164	1.70138	1.28109
Cell_0085	AMPKARt2	Glucose 17 mM + Glutamine 2.500000e-01 mM + EAA 1.000000e-01 X	0.512363	0.397835	0.657844	0.560013	0.517734	0.666931	0.57412	0.585664	0.677719	0.51965	0.681958	0.438113	0.535694	0.74608	0.543855	0.535936	0.585473	0.51689	0.470219	0.623999	0.649324	0.384435	0.659975	0.48593	0.782161	0.524112	0.60476	0.53045	0.58266	0.634858	0.675865	0.501117	0.602397	0.554887	0.501934	0.687489	0.653031	0.465311	0.651146	0.651963	0.540936	0.571317	0.525754	0.622088	0.625394	0.658778	0.399515
Cell_0086	TFEB_TR	Glucose 17 mM + Glutamine 2.500000e-01 mM + EAA 1.000000e-01 X	1.126	2.60342	0.711993	1.2805	1.09879	0.587684	1.29097	1.64341	1.42615	1.41658	2.07006	0.860937	1.30087	1.04183	1.33897	1.85371	0.710671	1.04008	1.21165	0.727414	1.34986	1.50898	1.60506	1.4666	1.54979	0.77948	0.863614	1.37982	1.90575	1.59903	0.798566	1.70436	1.31383	0.886821	0.899671	1.95107	1.05127	0.861981	1.63885	1.08768	1.12965	1.35149	1.64795	1.0092	1.52147	1.00937	1.98661
Cell_0086	FOXO_TR	Glucose 17 mM + Glutamine 2.500000e-01 mM + EAA 1.000000e-01 X	1.19464	1.07988	1.9694	1.53817	1.60034	1.59097	1.23529	0.99672	2.82211	1.54606	2.32618	2.11384	1.43009	1.28157	1.69954	1.44442	1.17003	1.01387	1.56601	2.06871	1.5679	1.23439	1.84273	1.71776	1.51215	1.23087	1.55279	1.47611	1.56633	0.995588	1.31726	1.33957	1.31429	1.58844	1.33214	1.53881	1.17165	1.26024	1.62057	1.50662	1.20041	1.28207	1.23879	1.19927	1.70394	1.61746	1.28739
Cell_0086	AMPKARt2	Glucose 17 mM + Glutamine 2.500000e-01 mM + EAA 1.000000e-01 X	0.501264	0.406855	0.654511	0.608078	0.532016	0.657018	0.567442	0.570769	0.673145	0.540309	0.689064	0.440725	0.533149	0.734233	0.531055	0.533146	0.602887	0.528038	0.468039	0.624789	0.650477	0.388795	0.674774	0.497313	0.788407	0.506929	0.617335	0.537843	0.596161	0.660617	0.670682	0.491158	0.612518	0.533251	0.515387	0.675699	0.650159	0.477406	0.652986	0.619276	0.545734	0.571169	0.514238	0.632932	0.619537	0.668183	0.414602
Cell_0087	TFEB_TR	Glucose 17 mM + Glutamine 2.500000e-01 mM + EAA 1.000000e-01 X	1.22743	2.58229	0.731198	1.31669	1.11487	0.607971	1.1809	1.73205	1.44363	1.34829	2.25962	0.905183	1.13127	0.664696	1.17364	1.87106	0.738256	1.01666	1.39361	0.752805	1.29799	1.52827	1.70883	1.43024	1.62871	0.971261	0.97787	1.37589	1.85342	1.64521	0.818169	1.93234	1.52251	0.889608	0.842252	1.90663	0.987394	0.833926	1.59848	1.04574	1.12966	1.29303	1.7023	1.02285	0.770967	1.11292	2.074
Cell_0087	FOXO_TR	Glucose 17 mM + Glutamine 2.500000e-01 mM + EAA 1.000000e-01 X	1.1665	1.10759	1.99123	1.5204	1.59196	1.6845	1.21443	0.999496	2.80466	1.63751	2.34669	2.08371	1.39377	1.19805	1.59299	1.46888	1.18414	1.00786	1.56309	2.14593	1.67737	1.23437	2.05081	1.72087	1.53585	1.22405	1.64499	1.43928	1.62168	1.03851	1.30399	1.30285	1.24541	1.54516	1.33287	1.58031	1.11351	1.23322	1.60472	1.49314	1.18116	1.26149	1.23778	1.17739	1.39562	1.55574	1.32523
Cell_0087	AMPKARt2	Glucose 17 mM + Glutamine 2.500000e-01 mM + EAA 1.000000e-01 X	0.480427	0.389765	0.645247	0.613006	0.540653	0.642705	0.583271	0.574358	0.663303	0.539218	0.689419	0.450569	0.525976	0.564128	0.527118	0.523854	0.589625	0.525073	0.472846	0.612509	0.649729	0.400059	0.679105	0.507411	0.776333	0.509628	0.617501	0.562527	0.595075	0.652332	0.661876	0.505024	0.602916	0.542943	0.521398	0.664149	0.645508	0.480787	0.654941	0.587483	0.547508	0.566727	0.503664	0.646223	0.614286	0.667153	0.419606
Cell_0088	TFEB_TR	Glucose 17 mM + Glutamine 2.500000e-01 mM + EAA 1.000000e-01 X	1.12291	2.65016	0.73439	1.47427	1.11954	0.636024	1.10918	1.75005	1.05545	1.46161	2.35939	0.946301	1.63803	0.650963	1.20954	1.83059	0.661558	0.988218	1.73347	0.76159	1.19319	1.51832	1.91489	1.30783	1.06668	1.18831	0.977969	1.36307	1.76082	1.6787	0.778501	1.98012	1.50059	0.9235	0.886723	1.9687	1.12882	0.820747	1.59371	1.35798	1.1752	1.18599	1.74162	1.09156	0.734645	1.35564	2.05452
Cell_0088	FOXO_TR	Glucose 17 mM + Glutamine 2.500000e-01 mM + EAA 1.000000e-01 X	1.14528	1.11135	1.94714	1.4151	1.55951	1.73753	1.19897	1.00485	2.63804	1.74451	2.25085	2.13032	1.38141	1.20539	1.60848	1.42986	1.21687	1.0074	1.55806	2.11746	1.69172	1.22335	2.18222	1.70586	1.53273	1.19621	1.73138	1.43442	1.60684	1.03415	1.24238	1.2735	1.19221	1.56	1.32341	1.57347	1.11501	1.1845	1.60391	1.48382	1.1741	1.23909	1.20543	1.17411	1.3512	1.57501	1.29365
Cell_0088	AMPKARt2	Glucose 17 mM + Glutamine 2.500000e-01 mM + EAA 1.000000e-01 X	0.493386	0.384121	0.647456	0.602463	0.536372	0.650274	0.592209	0.581268	0.643865	0.536635	0.685661	0.468879	0.530415	0.56357	0.536897	0.522221	0.578231	0.531331	0.478508	0.606861	0.64574	0.405906	0.646121	0.52662	0.764394	0.525241	0.615876	0.554618	0.60373	0.638127	0.662256	0.54013	0.595857	0.582234	0.516831	0.675047	0.670247	0.479064	0.664065	0.572904	0.528326	0.559682	0.497579	0.647859	0.626913	0.669359	0.410663
Cell_0089	TFEB_TR	Glucose 17 mM + Glutamine 2.500000e-01 mM + EAA 1.000000e-01 X	0.957553	2.58773	0.730448	1.53223	1.11336	0.639554	1.2363	1.66806	1.42032	1.40547	2.347	0.975899	1.74959	0.647023	1.28623	1.77174	0.598403	0.976102	1.73942	0.765324	1.0581	1.48381	1.73785	1.30682	0.848331	1.39386	0.972637	0.982893	1.97693	1.54156	0.722765	1.82893	1.15663	0.915452	0.979925	1.93909	1.28047	0.815886	1.47852	1.68297	1.32101	1.17903	1.69966	1.08717	0.783716	1.18214	1.82287
Cell_0089	FOXO_TR	Glucose 17 mM + Glutamine 2.500000e-01 mM + EAA 1.000000e-01 X	1.10412	1.09052	1.98572	1.30843	1.57523	1.69901	1.14569	1.01991	2.50789	1.71701	2.21265	2.19175	1.35249	1.19055	1.61167	1.39054	1.22624	1.01372	1.55284	2.05231	1.56981	1.21124	2.09521	1.72468	1.51305	1.16858	1.83574	1.88433	1.50472	1.02006	1.21526	1.30146	1.22027	1.60616	1.32646	1.51913	1.20902	1.16719	1.54712	1.47919	1.19986	1.22438	1.15133	1.14801	1.34546	1.61227	1.202
Cell_0089	AMPKARt2	Glucose 17 mM + Glutamine 2.500000e-01 mM + EAA 1.000000e-01 X	0.522003	0.3968	0.652327	0.614469	0.530048	0.656577	0.580846	0.576102	0.643541	0.541472	0.66756	0.470799	0.546178	0.55621	0.536176	0.519517	0.587619	0.544541	0.474999	0.61177	0.652552	0.411441	0.612949	0.561561	0.766405	0.530583	0.610463	0.552922	0.625043	0.641128	0.670007	0.545876	0.610942	0.593241	0.517919	0.682219	0.676926	0.477354	0.657549	0.564191	0.518246	0.559457	0.505239	0.640289	0.639411	0.678412	0.413373
Cell_0090	TFEB_TR	Glucose 17 mM + Glutamine 2.500000e-01 mM + EAA 1.000000e-01 X	1.00304	2.50273	0.733133	1.21328	1.10903	0.62042	1.10295	1.54413	2.04224	1.29921	2.41815	1.02577	1.59356	0.656712	1.33949	1.85586	0.739265	0.919218	1.46801	0.758489	1.01186	1.52672	1.76166	1.58043	1.28471	1.46858	1.1366	1.08642	2.11612	1.4205	0.742822	1.96034	1.11454	0.861475	0.947339	1.81621	1.42315	0.79069	1.33754	1.52773	1.47285	1.20924	1.68048	1.03914	0.818654	0.954666	1.76884
Cell_0090	FOXO_TR	Glucose 17 mM + Glutamine 2.500000e-01 mM + EAA 1.000000e-01 X	1.11644	1.10314	2.0498	1.23628	1.60581	1.62045	1.12207	1.00855	2.50417	1.61289	2.32529	2.2431	1.36773	1.19675	1.52318	1.39637	1.17093	1.01723	1.54074	2.05616	1.56989	1.22977	2.00058	1.74282	1.45657	1.13667	1.87515	1.90934	1.55686	1.05396	1.24173	1.35613	1.20693	1.61154	1.35079	1.47207	1.23743	1.14901	1.45327	1.50818	1.23092	1.26523	1.14367	1.1221	1.38191	1.59786	1.19912
Cell_0090	AMPKARt2	Glucose 17 mM + Glutamine 2.500000e-01 mM + EAA 1.000000e-01 X	0.514963	0.395872	0.646684	0.638219	0.530153	0.623095	0.579568	0.574748	0.652303	0.536767	0.657049	0.457387	0.555381	0.561402	0.536696	0.502765	0.594123	0.538335	0.471161	0.604404	0.662828	0.424832	0.61495	0.572087	0.781804	0.525684	0.600584	0.529165	0.619547	0.633338	0.67255	0.538167	0.616792	0.576609	0.523263	0.677857	0.619642	0.485336	0.644795	0.559783	0.53303	0.567234	0.516189	0.639964	0.636041	0.677583	0.420016
Cell_0091	TFEB_TR	Glucose 17 mM + Glutamine 2.500000e-01 mM + EAA 1.000000e-01 X	1.12273	2.52625	0.735619	1.06943	1.10698	0.645612	1.02026	1.51878	1.64353	1.41945	0.974285	1.08052	1.57773	0.657474	1.59863	1.93237	0.873918	0.90253	1.18199	0.765652	1.0441	1.58323	2.34932	1.75358	1.49306	1.34755	1.22014	1.11279	1.92728	1.47222	0.764876	2.16664	1.34361	0.841921	0.917984	1.80356	1.54732	0.763002	1.32445	1.33099	1.54751	1.00071	1.76198	1.04758	0.796146	1.05481	1.93117
Cell_0091	FOXO_TR	Glucose 17 mM + Glutamine 2.500000e-01 mM + EAA 1.000000e-01 X	1.18364	1.12719	2.06136	1.19391	1.58922	1.55918	1.18835	1.00753	2.56301	1.59123	1.98033	2.24425	1.41683	1.20521	1.49495	1.40694	1.12486	1.02219	1.56129	2.13551	1.66685	1.25556	1.98926	1.72105	1.41861	1.10255	1.79596	1.89646	1.67235	1.0817	1.24077	1.35501	1.13673	1.59036	1.3823	1.4893	1.17272	1.12728	1.46216	1.52032	1.23717	1.49419	1.16852	1.12802	1.41498	1.5682	1.26792
Cell_0091	AMPKARt2	Glucose 17 mM + Glutamine 2.500000e-01 mM + EAA 1.000000e-01 X	0.501325	0.396183	0.649399	0.653628	0.534786	0.5808	0.590444	0.578806	0.65462	0.534653	0.49729	0.457719	0.560031	0.576299	0.544327	0.495238	0.586654	0.527593	0.480169	0.587027	0.654422	0.434989	0.620114	0.549661	0.782554	0.527778	0.599941	0.535544	0.600225	0.627743	0.67388	0.551512	0.607531	0.579398	0.524118	0.676981	0.573113	0.494081	0.654245	0.559677	0.540681	0.679783	0.513853	0.645362	0.625685	0.665972	0.427773
Cell_0092	TFEB_TR	Glucose 17 mM + Glutamine 2.500000e-01 mM + EAA 1.000000e-01 X	1.03219	2.43526	0.752788	1.26825	1.09408	0.720253	1.39508	1.52226	1.19965	1.50562	0.858535	1.1036	1.30226	0.644471	1.63169	1.86361	0.817281	1.01919	1.33233	0.776976	1.11053	1.54837	2.53348	1.61948	1.39507	1.2225	1.13328	1.16165	1.78248	1.46758	0.734202	1.9508	1.46557	0.865352	1.00855	1.88718	1.56534	0.796484	1.39943	1.49713	1.56711	0.96676	1.83971	1.0514	0.773313	1.15328	1.94393
Cell_0092	FOXO_TR	Glucose 17 mM + Glutamine 2.500000e-01 mM + EAA 1.000000e-01 X	1.205	1.08904	2.13626	1.17102	1.54693	1.4411	1.2534	1.01911	2.63962	1.65608	2.00467	2.19089	1.42566	1.18166	1.49402	1.4178	1.13898	1.02379	1.57381	2.17496	1.73168	1.23421	1.9835	1.75894	1.47149	1.06363	1.66334	1.93725	1.58721	1.06568	1.18684	1.33675	1.14348	1.61321	1.40472	1.53032	1.12671	1.15922	1.50146	1.47176	1.22272	1.46652	1.17662	1.16152	1.4216	1.5483	1.28699
Cell_0092	AMPKARt2	Glucose 17 mM + Glutamine 2.500000e-01 mM + EAA 1.000000e-01 X	0.520837	0.414129	0.665135	0.658204	0.532334	0.582304	0.592793	0.577421	0.660908	0.545035	0.507132	0.466154	0.568193	0.578237	0.539205	0.512497	0.587768	0.532259	0.484805	0.570273	0.644626	0.431105	0.603957	0.541436	0.764524	0.532418	0.603951	0.549222	0.606643	0.649888	0.674145	0.554998	0.605327	0.58917	0.524054	0.677129	0.584598	0.489521	0.655891	0.561376	0.538534	0.682898	0.509439	0.644255	0.628229	0.667913	0.436785
Cell_0093	TFEB_TR	Glucose 17 mM + Glutamine 2.500000e-01 mM + EAA 1.000000e-01 X	0.964004	2.2814	0.790333	1.26151	1.08389	0.767733	1.41378	1.57491	1.986	1.4289	1.03047	1.1274	1.55004	0.646896	1.36599	1.79445	0.715658	1.07331	1.64089	0.757723	1.22077	1.50062	2.2633	1.55417	1.37067	1.24242	1.09798	1.12627	1.73214	1.36457	0.734994	1.6066	1.36401	0.880034	0.985021	1.9157	1.41718	0.869452	1.46116	1.58428	1.57804	0.929736	1.82351	1.02053	0.789632	1.13778	1.84774
Cell_0093	FOXO_TR	Glucose 17 mM + Glutamine 2.500000e-01 mM + EAA 1.000000e-01 X	1.19965	1.04781	2.24626	1.11622	1.52205	1.27148	1.24013	0.997008	2.69322	1.73568	1.99117	2.18974	1.4005	1.17688	1.41766	1.45028	1.12862	1.00673	1.52374	2.09734	1.82364	1.20277	1.9429	1.84762	1.81549	1.00918	1.5698	1.97245	1.47014	1.05294	1.14398	1.35541	1.15595	1.65883	1.39495	1.52663	1.11331	1.21936	1.42345	1.45531	1.21445	1.46747	1.16398	1.1573	1.44584	1.51568	1.28858
Cell_0093	AMPKARt2	Glucose 17 mM + Glutamine 2.500000e-01 mM + EAA 1.000000e-01 X	0.530075	0.414759	0.652802	0.66369	0.519231	0.611726	0.585493	0.580233	0.661474	0.547543	0.518282	0.458575	0.566018	0.57294	0.529623	0.520627	0.6021	0.534001	0.477485	0.55355	0.653652	0.427826	0.582564	0.57157	0.584643	0.537183	0.604531	0.552466	0.622979	0.657624	0.663505	0.547201	0.607126	0.560037	0.530577	0.677919	0.597003	0.487748	0.646281	0.563264	0.542744	0.682871	0.514329	0.636696	0.63693	0.691901	0.426519
Cell_0094	TFEB_TR	Glucose 17 mM + Glutamine 2.500000e-01 mM + EAA 1.000000e-01 X	1.19189	2.32014	0.812539	1.10814	1.09952	0.78314	0.890083	1.787	2.83363	1.44912	1.19626	1.15502	2.40065	0.663547	1.49276	1.8419	0.64993	1.00329	1.44279	0.806442	1.34531	1.49686	2.39793	1.68842	1.30801	1.16849	1.05753	1.06358	1.56049	1.3425	0.770427	1.62499	1.24619	0.886839	0.850104	1.88086	1.36639	0.923532	1.48068	1.39494	1.60343	0.945762	1.80107	1.0068	0.869837	1.17156	1.87656
Cell_0094	FOXO_TR	Glucose 17 mM + Glutamine 2.500000e-01 mM + EAA 1.000000e-01 X	1.21814	1.09851	2.24695	1.0598	1.54472	1.19349	1.20619	0.990296	2.66269	1.75262	1.85914	2.22677	1.37402	1.20268	1.37223	1.48246	1.1069	0.980594	1.46129	2.01304	1.91456	1.21762	1.89467	1.77558	1.81596	0.973041	1.53837	1.93421	1.50379	1.04276	1.15516	1.37981	1.08794	1.67002	1.35954	1.54412	1.10157	1.24301	1.41733	1.47616	1.21921	1.46177	1.18542	1.1033	1.48427	1.5035	1.31334
Cell_0094	AMPKARt2	Glucose 17 mM + Glutamine 2.500000e-01 mM + EAA 1.000000e-01 X	0.509772	0.399987	0.605055	0.679015	0.518232	0.626721	0.581979	0.59225	0.649882	0.543616	0.515108	0.449437	0.55906	0.57484	0.537097	0.509832	0.604699	0.526102	0.476036	0.547438	0.659376	0.432437	0.556467	0.600028	0.594357	0.54883	0.606455	0.553872	0.628268	0.632324	0.656692	0.55685	0.608575	0.509058	0.539058	0.67866	0.589759	0.496259	0.667206	0.566184	0.54234	0.676851	0.525465	0.635194	0.639313	0.713814	0.412969
Cell_0095	TFEB_TR	Glucose 17 mM + Glutamine 2.500000e-01 mM + EAA 1.000000e-01 X	1.40217	2.35407	0.862871	1.08636	1.11584	0.811556	0.753957	0.598687	2.47196	1.49536	1.15761	1.14404	2.34138	0.662936	1.66207	1.96305	0.64972	1.01593	1.26308	0.941465	1.48035	1.48841	2.55894	1.73756	1.37884	0.952067	0.977288	1.23987	1.51902	1.35512	0.75286	1.85455	1.4796	0.914478	0.867426	1.85609	1.47294	0.940835	1.48859	1.37097	1.63336	0.98485	1.79988	1.00275	0.934103	1.11887	1.94473
Cell_0095	FOXO_TR	Glucose 17 mM + Glutamine 2.500000e-01 mM + EAA 1.000000e-01 X	1.1939	1.16164	2.17512	1.11396	1.60017	1.19489	1.2099	1.59896	2.56809	1.71265	1.76075	2.20625	1.36764	1.19974	1.36083	1.49151	1.1432	0.962312	1.43711	2.05681	2.02042	1.23857	1.84947	1.62046	1.80867	0.972967	1.52965	1.93298	1.48754	1.02303	1.17854	1.4045	1.07591	1.6702	1.33779	1.6572	1.08404	1.23329	1.38841	1.43531	1.22005	1.44847	1.22897	1.10674	1.47607	1.54021	1.31825
Cell_0095	AMPKARt2	Glucose 17 mM + Glutamine 2.500000e-01 mM + EAA 1.000000e-01 X	0.503988	0.409006	0.56942	0.687275	0.530393	0.630671	0.594393	0.543448	0.648273	0.548282	0.501888	0.460771	0.561392	0.574363	0.546625	0.508267	0.59304	0.521721	0.474133	0.546048	0.643064	0.430803	0.535153	0.600429	0.589189	0.560004	0.603386	0.555647	0.635398	0.623668	0.669734	0.560668	0.605981	0.491981	0.543032	0.673525	0.590257	0.500015	0.616219	0.589062	0.539332	0.676696	0.538005	0.647503	0.636502	0.71153	0.425231
Cell_0096	TFEB_TR	Glucose 17 mM + Glutamine 2.500000e-01 mM + EAA 1.000000e-01 X	1.29439	2.19591	1.03804	1.04377	1.09923	0.824843	1.0504	0.540186	1.73376	1.33742	1.21751	1.11908	1.62583	0.641008	1.25472	2.07911	0.740935	1.04156	1.57002	0.95349	1.68652	1.50594	2.37073	1.56752	1.42398	0.952628	1.07221	1.39837	1.73529	1.32853	0.699113	1.91909	1.80229	0.955781	0.921457	1.8539	1.26477	0.915698	1.61518	1.54375	1.65801	0.97495	1.72355	1.00878	0.885412	0.997682	1.89766
Cell_0096	FOXO_TR	Glucose 17 mM + Glutamine 2.500000e-01 mM + EAA 1.000000e-01 X	1.1579	1.13556	2.10969	1.19562	1.62115	1.15358	1.2343	1.53725	2.49415	1.71638	1.82325	2.19816	1.42027	1.15024	1.28804	1.47105	1.17438	0.945965	1.48208	2.15067	2.21677	1.24836	1.74383	1.64244	1.82882	0.976813	1.51762	1.96635	1.38755	1.03866	1.13569	1.45779	1.11464	1.67409	1.33746	1.76383	1.06118	1.21518	1.40672	1.38362	1.2312	1.44699	1.20617	1.16125	1.45351	1.53692	1.32727
Cell_0096	AMPKARt2	Glucose 17 mM + Glutamine 2.500000e-01 mM + EAA 1.000000e-01 X	0.517096	0.421952	0.560096	0.678666	0.523251	0.634286	0.611093	0.547817	0.661772	0.551222	0.503739	0.4727	0.557692	0.565055	0.540853	0.507406	0.583806	0.521921	0.464673	0.531575	0.617991	0.434473	0.563289	0.60378	0.580528	0.565746	0.593915	0.562017	0.64009	0.637521	0.674366	0.551471	0.595198	0.503967	0.550087	0.674542	0.595163	0.500656	0.598573	0.626028	0.54807	0.683218	0.545704	0.662903	0.634395	0.699763	0.439356
Cell_0097	TFEB_TR	Glucose 17 mM + Glutamine 2.500000e-01 mM + EAA 1.000000e-01 X	1.07045	2.07885	1.27961	0.980395	1.07594	0.801993	1.15717	0.53021	1.47399	1.20417	1.40641	1.0998	1.48698	0.626743	1.08652	2.09631	0.723606	0.954275	1.64222	0.879018	1.9175	0.631647	2.48424	1.29845	1.43774	1.08735	1.25902	1.26446	1.75846	1.27766	0.686619	1.8651	1.77885	1.02885	0.826279	1.83144	1.03408	0.884658	1.55804	1.55157	1.68409	0.940642	1.68582	1.03445	0.82013	1.07522	1.79311
Cell_0097	FOXO_TR	Glucose 17 mM + Glutamine 2.500000e-01 mM + EAA 1.000000e-01 X	1.2031	1.0823	2.05346	1.15241	1.60943	1.10836	1.24287	1.49947	2.43789	1.73205	1.87718	2.23154	1.47181	1.10748	1.25459	1.45418	1.18662	0.943372	1.5787	2.10908	2.25591	1.27386	1.61425	1.67946	1.84858	0.976636	1.52229	1.93192	1.37617	1.06294	1.06526	1.50327	1.08166	1.66205	1.33675	1.77428	1.04816	1.18627	1.39463	1.39007	1.2666	1.41951	1.16985	1.15568	1.47075	1.45086	1.35297
Cell_0097	AMPKARt2	Glucose 17 mM + Glutamine 2.500000e-01 mM + EAA 1.000000e-01 X	0.524325	0.408273	0.555488	0.673795	0.514572	0.624572	0.604236	0.568975	0.676794	0.546466	0.512455	0.465621	0.547621	0.566831	0.536083	0.498242	0.583743	0.525297	0.467758	0.517488	0.601855	0.519381	0.629022	0.608812	0.591371	0.566102	0.597277	0.57505	0.636442	0.637672	0.648005	0.56191	0.591006	0.49443	0.558834	0.686513	0.594832	0.505033	0.613682	0.631463	0.555373	0.68821	0.550829	0.667366	0.634353	0.705827	0.434185
Cell_0098	TFEB_TR	Glucose 17 mM + Glutamine 2.500000e-01 mM + EAA 1.000000e-01 X	1.00224	2.11754	1.50211	1.0206	1.08114	0.792344	1.03815	0.536766	1.36356	1.26318	1.38947	1.0693	1.68728	0.643528	1.5677	2.00742	0.638884	1.05727	1.39356	0.96103	2.03268	0.590922	2.68834	1.19318	1.49231	1.0091	1.2772	1.15015	1.50199	1.15395	0.721301	1.9785	1.77414	1.1552	0.748497	1.80758	1.4382	0.876768	1.45339	1.48087	1.69078	0.911407	1.84356	1.01478	0.850567	1.24906	1.78162
Cell_0098	FOXO_TR	Glucose 17 mM + Glutamine 2.500000e-01 mM + EAA 1.000000e-01 X	1.24112	1.06752	2.05909	1.09438	1.64599	1.12868	1.243	1.57229	2.32099	1.68229	1.79692	2.20034	1.4067	1.15896	1.2816	1.49358	1.23094	0.971879	1.61007	1.95014	2.00059	1.22144	1.56927	1.5738	1.82944	0.986763	1.56586	1.85625	1.36399	1.03188	1.09805	1.5133	1.07419	1.65944	1.32562	1.78664	1.03801	1.14971	1.34603	1.3766	1.28827	1.37392	1.21537	1.13197	1.48954	1.40037	1.34947
Cell_0098	AMPKARt2	Glucose 17 mM + Glutamine 2.500000e-01 mM + EAA 1.000000e-01 X	0.525354	0.401057	0.550201	0.675501	0.53973	0.613693	0.582897	0.578958	0.680824	0.543865	0.511711	0.459647	0.553795	0.584174	0.542898	0.502504	0.597102	0.530653	0.477682	0.513703	0.601949	0.514687	0.657766	0.592741	0.609412	0.560068	0.612019	0.580245	0.651129	0.633361	0.616537	0.579465	0.594986	0.470373	0.555463	0.692384	0.600065	0.507499	0.617499	0.61179	0.551648	0.684831	0.557458	0.661135	0.633362	0.721378	0.421762
Cell_0099	TFEB_TR	Glucose 17 mM + Glutamine 2.500000e-01 mM + EAA 1.000000e-01 X	1.08688	2.15375	1.76404	1.17147	0.757403	0.801803	0.967734	0.538557	1.45837	1.24892	1.27148	1.06043	1.62342	0.679462	1.69469	1.97437	0.702819	1.45399	1.45133	1.09122	2.03413	0.599545	2.4235	1.2997	1.46397	0.87492	1.16822	1.20588	1.4047	1.04058	0.811724	2.1582	1.83295	1.2436	0.790476	0.782814	1.74054	0.875906	1.44549	1.47302	1.66884	0.877506	1.96715	0.948125	0.915081	1.24652	1.87915
Cell_0099	FOXO_TR	Glucose 17 mM + Glutamine 2.500000e-01 mM + EAA 1.000000e-01 X	1.24076	1.06433	2.13566	1.12825	2.04038	1.14953	1.25837	1.6612	2.18761	1.66301	1.66101	2.13476	1.31803	1.29062	1.21852	1.52453	1.24661	0.999078	1.60712	1.87109	1.78583	1.24354	1.55815	1.54907	1.77553	0.994859	1.6361	1.82492	1.30407	1.00696	1.20131	1.57115	1.13407	1.64894	1.30509	1.85857	1.02161	1.14457	1.29528	1.31939	1.2895	1.3801	1.25173	1.1444	1.50648	1.41824	1.35732
Cell_0099	AMPKARt2	Glucose 17 mM + Glutamine 2.500000e-01 mM + EAA 1.000000e-01 X	0.523454	0.424259	0.540616	0.674408	0.574627	0.626256	0.581225	0.567858	0.669534	0.546064	0.518514	0.460352	0.566955	0.580604	0.547773	0.50801	0.613269	0.533819	0.476068	0.509725	0.612654	0.517085	0.641064	0.594084	0.60283	0.557381	0.611641	0.577438	0.67632	0.650457	0.602001	0.577884	0.599437	0.468794	0.549967	0.57954	0.623502	0.505241	0.608752	0.622396	0.549808	0.671711	0.558259	0.654715	0.629895	0.72329	0.413097
Cell_0100	TFEB_TR	Glucose 17 mM + Glutamine 2.500000e-01 mM + EAA 1.000000e-01 X	1.11854	2.0957	1.99608	1.38159	0.873226	0.790105	1.02923	0.545093	1.87263	1.18927	1.30749	1.06354	1.4743	0.702261	1.32149	2.07744	0.624014	1.72871	1.53539	1.09743	2.05024	0.594711	2.34215	1.32385	1.40929	0.879512	1.09248	1.2274	1.51435	1.04713	0.993673	2.10398	1.50381	1.25413	0.863304	0.779331	1.321	0.908618	1.47085	1.33496	1.65249	0.856334	1.86659	0.930087	0.923507	1.15572	1.94565
Cell_0100	FOXO_TR	Glucose 17 mM + Glutamine 2.500000e-01 mM + EAA 1.000000e-01 X	1.33553	1.06438	2.12746	1.14976	1.96658	1.13536	1.24976	1.63825	2.17759	1.72592	1.61336	2.08819	1.35951	1.35142	1.1456	1.48039	1.20427	1.00475	1.75352	1.88772	1.76418	1.23379	1.55705	1.5941	1.71523	1.0012	1.69499	1.89739	1.36077	1.03905	1.21789	1.70345	1.1206	1.58746	1.28979	1.78209	1.00578	1.17421	1.28668	1.28945	1.30065	1.40705	1.22086	1.12762	1.54747	1.42832	1.3974
Cell_0100	AMPKARt2	Glucose 17 mM + Glutamine 2.500000e-01 mM + EAA 1.000000e-01 X	0.529531	0.445412	0.526588	0.683517	0.602081	0.644197	0.59258	0.564523	0.665941	0.549138	0.523464	0.444021	0.564212	0.545492	0.546828	0.504343	0.613583	0.53931	0.482795	0.502445	0.62162	0.530812	0.631251	0.622831	0.589884	0.559641	0.598481	0.579053	0.668867	0.675405	0.601929	0.57648	0.603707	0.465174	0.557355	0.573562	0.654612	0.499043	0.623509	0.655386	0.554117	0.687635	0.555928	0.661353	0.613539	0.719198	0.424452
Cell_0101	TFEB_TR	Glucose 17 mM + Glutamine 2.500000e-01 mM + EAA 1.000000e-01 X	1.07373	2.03944	2.05466	1.37417	0.8604	0.770062	1.07854	0.530666	1.89734	1.33025	1.35131	1.02754	1.78674	0.698626	1.31566	2.18437	0.444334	1.74324	0.67881	1.08965	2.09309	0.571167	2.63274	1.2535	1.45473	0.971093	1.08794	1.18191	1.6184	1.06298	1.17473	2.06257	1.26265	1.32889	0.908341	0.818277	1.20588	0.956037	1.46619	1.1545	1.64565	0.861303	1.83097	0.951962	0.920241	1.17824	1.92109
Cell_0101	FOXO_TR	Glucose 17 mM + Glutamine 2.500000e-01 mM + EAA 1.000000e-01 X	1.4632	1.08012	1.94336	1.13051	2.03173	1.13103	1.21219	1.57071	2.24909	1.79356	1.71761	1.99288	1.42412	1.29932	1.20219	1.46805	1.17724	1.01178	1.21794	1.84005	1.74889	1.18167	1.62554	1.54703	1.72509	1.04078	1.6879	2.01447	1.42029	1.0565	1.14438	1.78514	1.06743	1.54757	1.302	1.88072	0.984437	1.17419	1.30211	1.29576	1.30108	1.38408	1.22358	1.10406	1.55796	1.50129	1.40915
Cell_0101	AMPKARt2	Glucose 17 mM + Glutamine 2.500000e-01 mM + EAA 1.000000e-01 X	0.552858	0.441837	0.521659	0.694545	0.604843	0.647806	0.590038	0.579545	0.679141	0.54538	0.506888	0.424745	0.55691	0.514815	0.546754	0.516414	0.605611	0.549603	0.638338	0.488948	0.628291	0.544269	0.634835	0.624114	0.602416	0.560703	0.598363	0.5707	0.647676	0.671733	0.609005	0.587831	0.594066	0.442993	0.561281	0.569047	0.662673	0.493302	0.636205	0.658743	0.561416	0.715143	0.561374	0.679651	0.579665	0.721488	0.449821
Cell_0102	TFEB_TR	Glucose 17 mM + Glutamine 2.500000e-01 mM + EAA 1.000000e-01 X	1.14419	2.14992	2.07952	1.0865	0.857368	0.763444	1.06524	0.502463	1.66872	1.40254	1.42229	1.00388	2.31742	0.691845	1.50044	2.18429	0.75716	1.70231	0.686571	1.10669	2.07762	0.577024	2.52348	1.30382	1.45106	1.13436	1.11415	1.16398	1.65361	1.0606	1.23369	2.36725	1.44582	1.46216	0.870311	0.867634	1.79604	0.931522	1.43066	1.15956	1.63905	0.897091	2.00583	0.94279	1.02928	1.22441	1.87835
Cell_0102	FOXO_TR	Glucose 17 mM + Glutamine 2.500000e-01 mM + EAA 1.000000e-01 X	1.48909	1.11364	1.72893	1.12532	2.07922	1.13193	1.22427	1.54639	2.22362	1.86757	1.81392	1.90586	1.40524	1.25281	1.23513	1.50665	1.17722	1.00423	1.20877	1.73819	1.70999	1.17083	1.64305	1.56863	1.7883	1.08579	1.61886	2.02954	1.30336	1.0612	1.08308	1.78887	1.09858	1.5515	1.32761	2.00103	0.978206	1.15249	1.288	1.31111	1.28371	1.36092	1.2714	1.11477	1.53945	1.66157	1.424
Cell_0102	AMPKARt2	Glucose 17 mM + Glutamine 2.500000e-01 mM + EAA 1.000000e-01 X	0.569357	0.434871	0.522117	0.686304	0.606509	0.651039	0.58028	0.590264	0.680338	0.53455	0.509331	0.43939	0.555362	0.498512	0.54492	0.524192	0.596572	0.555546	0.652535	0.476993	0.635714	0.545821	0.635432	0.606775	0.613733	0.569411	0.607577	0.539853	0.657993	0.640796	0.606508	0.594162	0.583612	0.445079	0.551812	0.572755	0.651721	0.491422	0.629209	0.643314	0.567776	0.653829	0.567255	0.686057	0.561009	0.720034	0.452909
Cell_0103	TFEB_TR	Glucose 17 mM + Glutamine 2.500000e-01 mM + EAA 1.000000e-01 X	1.16257	1.19699	2.14369	0.992581	0.863123	0.747864	1.21175	0.502179	1.91079	1.24438	1.66436	1.01748	2.39538	0.702386	1.33393	2.11299	1.14957	1.59067	0.676272	1.09706	1.99679	0.577558	2.2435	1.34421	1.4065	1.19858	1.09564	1.19395	1.4612	1.0913	1.24659	2.56481	0.805001	1.45658	0.790823	0.871962	1.96078	0.882153	1.36262	1.19511	1.64291	0.946201	2.08788	0.935328	1.21647	1.12002	1.82871
Cell_0103	FOXO_TR	Glucose 17 mM + Glutamine 2.500000e-01 mM + EAA 1.000000e-01 X	1.53387	1.91754	1.60699	1.13546	2.04872	1.11321	1.26628	1.55983	2.10117	1.96032	1.76247	1.9085	1.41848	1.24154	1.15547	1.49589	1.17027	0.956411	1.20831	1.69761	1.71705	1.16091	1.5523	1.67966	1.80975	1.07982	1.61994	1.97029	1.22187	1.10649	1.04596	1.81408	1.33332	1.49404	1.31409	1.99453	0.991588	1.17228	1.2636	1.33108	1.28373	1.37521	1.29031	1.08798	1.5729	1.70689	1.45198
Cell_0103	AMPKARt2	Glucose 17 mM + Glutamine 2.500000e-01 mM + EAA 1.000000e-01 X	0.565831	0.670167	0.519307	0.678369	0.608265	0.651385	0.574239	0.582187	0.671537	0.528921	0.535906	0.474094	0.548226	0.488114	0.543934	0.507533	0.58358	0.552547	0.639543	0.479479	0.636279	0.545248	0.64156	0.613597	0.608194	0.581063	0.609553	0.51415	0.680895	0.634494	0.592043	0.591269	0.576748	0.468679	0.548841	0.577324	0.654784	0.48757	0.627123	0.651475	0.565751	0.562343	0.568546	0.673438	0.570541	0.714861	0.436933
Cell_0104	TFEB_TR	Glucose 17 mM + Glutamine 2.500000e-01 mM + EAA 1.000000e-01 X	0.997694	1.37391	2.08045	1.15103	0.800361	0.724578	1.47474	0.494536	2.01236	1.28111	1.79404	1.004	2.34142	0.70723	1.29939	2.12621	0.896647	1.43589	0.708363	1.08573	1.88877	0.557967	2.40835	1.27693	1.4792	1.08416	1.1224	1.18165	1.18954	1.05813	1.31059	2.27997	0.750947	1.37872	0.803425	0.858053	1.42629	0.882171	1.31795	1.15245	1.62661	0.954568	2.01211	0.963386	1.3584	0.96141	1.76801
Cell_0104	FOXO_TR	Glucose 17 mM + Glutamine 2.500000e-01 mM + EAA 1.000000e-01 X	1.63127	1.87424	1.51218	1.17801	2.08092	1.10582	1.29734	1.5454	2.01696	2.02668	1.70029	1.89534	1.46598	1.20049	1.11811	1.56297	1.15261	0.913874	1.21819	1.66261	1.7392	1.12333	1.54773	1.65278	1.87251	1.07843	1.74796	1.93	1.31864	1.11288	0.99679	1.84209	1.35182	1.41611	1.26239	1.95101	0.972022	1.19419	1.27881	1.35844	1.28037	1.3578	1.29619	1.05407	1.5983	1.60927	1.42326
Cell_0104	AMPKARt2	Glucose 17 mM + Glutamine 2.500000e-01 mM + EAA 1.000000e-01 X	0.556894	0.684231	0.521587	0.680644	0.603852	0.638899	0.562671	0.574659	0.674955	0.525096	0.521943	0.488056	0.549846	0.492151	0.552967	0.514915	0.582222	0.549123	0.636047	0.485721	0.630481	0.551899	0.645301	0.61554	0.615189	0.577092	0.604628	0.516023	0.681539	0.662015	0.58855	0.588342	0.576522	0.47407	0.557428	0.577166	0.66599	0.491156	0.627186	0.666496	0.564441	0.582379	0.57908	0.669052	0.565477	0.719339	0.433879
Cell_0105	TFEB_TR	Glucose 17 mM + Glutamine 2.500000e-01 mM + EAA 1.000000e-01 X	1.06919	1.2426	2.02713	1.10966	0.774545	0.724466	1.49265	0.46046	1.67702	1.52454	1.74344	1.01102	2.30511	0.712062	1.51456	1.26357	0.574129	1.43039	0.771492	1.07095	1.79704	0.570253	2.49254	1.29975	1.5939	1.02991	1.40479	1.08677	1.32215	1	1.38059	2.11253	0.813199	1.41802	0.862033	0.883309	1.11056	0.883062	1.32661	1.15406	1.58483	0.980352	2.00956	0.975286	1.50926	0.973	0.698868
Cell_0105	FOXO_TR	Glucose 17 mM + Glutamine 2.500000e-01 mM + EAA 1.000000e-01 X	1.58749	1.86677	1.43431	1.2175	2.17645	1.12667	1.40027	1.4677	2.00003	2.08703	1.71947	1.89585	1.43874	1.15442	1.16262	1.45701	1.12825	0.920463	1.23493	1.5536	1.7824	1.12175	1.63789	1.55064	2.07397	1.10722	1.85253	1.87368	1.38831	1.05223	0.957121	1.84871	1.43621	1.42284	1.24899	1.93311	0.940975	1.19241	1.31412	1.39279	1.25618	1.30375	1.32443	1.08561	1.50522	1.57546	2.01836
Cell_0105	AMPKARt2	Glucose 17 mM + Glutamine 2.500000e-01 mM + EAA 1.000000e-01 X	0.546046	0.687835	0.525357	0.671943	0.607324	0.635115	0.552156	0.586973	0.679287	0.515896	0.47477	0.476403	0.567526	0.493937	0.563644	0.472372	0.588383	0.552878	0.65567	0.496997	0.631892	0.553457	0.633359	0.59011	0.62442	0.56984	0.593179	0.528574	0.668328	0.672814	0.59795	0.583331	0.568022	0.477152	0.561853	0.582213	0.663293	0.508456	0.626516	0.659468	0.574454	0.629567	0.59137	0.68075	0.542729	0.725768	0.668151
Cell_0106	TFEB_TR	Glucose 17 mM + Glutamine 2.500000e-01 mM + EAA 1.000000e-01 X	1.27643	1.44247	2.14628	1.06846	0.821923	0.735683	1.23942	0.458781	1.71851	1.56284	1.86927	1.11424	2.06615	0.759833	1.32775	1.26267	0.715771	1.38184	0.765984	1.0781	1.76865	0.600394	2.10208	1.42417	1.73272	1.0811	1.68199	1.03058	1.67946	1.03564	1.42941	2.40962	0.86501	1.43567	0.87297	0.931983	1.22865	0.89201	1.32686	1.18541	1.58769	1.12682	2.10914	0.944186	1.63246	1.1491	0.780308
Cell_0106	FOXO_TR	Glucose 17 mM + Glutamine 2.500000e-01 mM + EAA 1.000000e-01 X	1.4576	1.86929	1.43081	1.2052	2.25048	1.1286	1.52701	1.41159	1.97652	2.14473	1.72489	2.07481	1.44043	1.15259	1.2004	1.44797	1.11781	0.941376	1.26188	1.47508	1.87217	1.15274	1.63199	1.5256	2.27536	1.09174	1.85445	1.85134	1.31721	1.0611	0.960214	1.93991	1.42756	1.41257	1.28533	1.94462	0.953037	1.22958	1.35044	1.40425	1.26874	1.27662	1.36323	1.07374	1.39036	1.62903	2.08381
Cell_0106	AMPKARt2	Glucose 17 mM + Glutamine 2.500000e-01 mM + EAA 1.000000e-01 X	0.547855	0.67596	0.52059	0.663416	0.605288	0.642516	0.559617	0.600281	0.682321	0.520673	0.451393	0.456895	0.56422	0.474925	0.564805	0.472071	0.581217	0.556254	0.663479	0.524039	0.63901	0.545602	0.631827	0.571561	0.610816	0.575868	0.590767	0.531992	0.662955	0.660263	0.598266	0.576736	0.554206	0.493594	0.562327	0.586431	0.653323	0.507059	0.634904	0.650133	0.580656	0.592396	0.578891	0.681409	0.541026	0.720518	0.669915
Cell_0107	TFEB_TR	Glucose 17 mM + Glutamine 2.500000e-01 mM + EAA 1.000000e-01 X	1.06518	1.87889	2.138	1.34421	0.872294	0.72623	1.01773	0.48209	1.7227	1.49385	2.11113	1.24386	2.28675	0.801131	1.01008	1.25367	0.856237	1.0726	0.737175	1.09271	1.7531	0.606448	1.9392	1.44218	1.8967	1.24193	1.52358	1.00841	1.77143	1.20188	1.47397	2.49397	0.848067	1.31323	0.91367	0.988844	1.38306	0.914718	1.36921	1.20777	1.61801	1.309	2.29824	0.919004	1.54359	1.25854	0.723155
Cell_0107	FOXO_TR	Glucose 17 mM + Glutamine 2.500000e-01 mM + EAA 1.000000e-01 X	1.45695	1.9275	1.41416	1.22402	2.26867	1.09645	1.52845	1.43593	1.88347	2.13449	1.70008	2.27271	1.56193	1.13371	1.20161	1.45829	1.12119	0.937186	1.28657	1.50474	1.93343	1.16353	1.5905	1.50783	2.34396	1.0956	1.83838	1.92055	1.21493	1.13895	0.965152	2.07831	1.36744	1.32047	1.30061	2.01486	0.957527	1.2768	1.41299	1.37543	1.32093	1.26115	1.40638	0.993293	1.37933	1.66896	2.06994
Cell_0107	AMPKARt2	Glucose 17 mM + Glutamine 2.500000e-01 mM + EAA 1.000000e-01 X	0.570673	0.666006	0.515413	0.676394	0.594475	0.640949	0.571665	0.589049	0.691839	0.539719	0.446835	0.437893	0.544438	0.462152	0.562375	0.467049	0.579335	0.553514	0.653234	0.538888	0.635842	0.549032	0.649414	0.566894	0.596325	0.576698	0.61061	0.529585	0.66497	0.528095	0.588424	0.577807	0.545014	0.501768	0.564713	0.577861	0.649735	0.491918	0.633732	0.651265	0.577909	0.550086	0.559313	0.671664	0.54347	0.715381	0.67033
Cell_0108	TFEB_TR	Glucose 17 mM + Glutamine 2.500000e-01 mM + EAA 1.000000e-01 X	0.875496	1.73048	1.92273	1.39195	0.920205	0.717639	1.08163	0.491022	1.4171	1.5004	2.21987	1.33696	2.67085	0.785503	1.14103	1.25181	0.799809	0.958383	0.771258	0.998574	1.69612	0.617088	2.23377	1.33378	1.96698	1.57401	1.24406	1.03855	1.69805	1.09944	1.51783	2.10461	0.870234	1.23443	0.982641	1.03984	1.49034	0.870179	1.4982	1.30352	1.58793	1.44393	2.55801	0.94867	1.41173	1.18605	0.683419
Cell_0108	FOXO_TR	Glucose 17 mM + Glutamine 2.500000e-01 mM + EAA 1.000000e-01 X	1.51847	2.04678	1.33813	1.28374	2.1773	1.08798	1.48775	1.47355	1.75419	2.08747	1.65933	2.22298	1.65897	1.07017	1.17595	1.44008	1.09228	0.930538	1.29565	1.52593	1.90484	1.17077	1.65475	1.50529	2.33386	1.201	1.83372	1.93106	1.19016	1.11015	0.93607	2.09963	1.44639	1.29068	1.28249	2.01386	0.936188	1.2764	1.47658	1.35031	1.33721	1.23547	1.43537	1.0203	1.39217	1.70749	2.05997
Cell_0108	AMPKARt2	Glucose 17 mM + Glutamine 2.500000e-01 mM + EAA 1.000000e-01 X	0.572063	0.671477	0.513315	0.691492	0.602035	0.644949	0.566922	0.57	0.69419	0.539219	0.449273	0.430785	0.551074	0.466099	0.558942	0.47962	0.587161	0.556574	0.645385	0.527089	0.625579	0.560635	0.650789	0.557536	0.595146	0.562475	0.613989	0.528952	0.662917	0.491787	0.586424	0.58081	0.549832	0.502184	0.563225	0.575563	0.660366	0.508736	0.622431	0.64854	0.582635	0.539299	0.570216	0.676236	0.532604	0.72389	0.678873
Cell_0109	TFEB_TR	Glucose 17 mM + Glutamine 2.500000e-01 mM + EAA 1.000000e-01 X	1.20799	1.37046	1.8236	1.10857	0.953943	0.746283	1.43716	0.504412	2.136	1.45555	2.35158	1.41291	0.938489	0.790747	1.31254	1.43638	0.78668	1.25512	0.777776	0.891666	1.66141	0.640599	2.23273	1.32741	2.03639	1.73238	1.26136	1.29868	1.6292	0.957721	1.56566	1.94706	0.881042	1.25765	0.973401	1.02106	1.45093	0.83663	1.50851	1.45219	1.53188	1.59035	2.64554	0.976226	1.4598	1.08573	0.723125
Cell_0109	FOXO_TR	Glucose 17 mM + Glutamine 2.500000e-01 mM + EAA 1.000000e-01 X	1.52297	2.06511	1.31102	1.2741	2.04419	1.11304	1.4951	1.45195	1.68911	2.09386	1.59498	2.03606	1.59653	1.05747	1.17286	1.43931	1.04858	0.941774	1.29797	1.46584	1.82984	1.19754	1.69434	1.55288	2.29677	1.27769	1.84246	1.83502	1.223	1.16024	0.924494	2.06048	1.50466	1.35864	1.26453	1.9053	0.955248	1.28708	1.47829	1.36418	1.31151	1.23478	1.42603	1.23813	1.34939	1.73716	2.08395
Cell_0109	AMPKARt2	Glucose 17 mM + Glutamine 2.500000e-01 mM + EAA 1.000000e-01 X	0.547083	0.676854	0.511408	0.687382	0.615739	0.65976	0.558121	0.572597	0.69758	0.525158	0.467814	0.442835	0.556163	0.462773	0.552293	0.485284	0.575753	0.566834	0.647659	0.521737	0.625231	0.544162	0.638693	0.55132	0.592448	0.558133	0.591399	0.52285	0.662245	0.503655	0.590625	0.574457	0.55953	0.503903	0.558479	0.594748	0.675365	0.526039	0.620736	0.640827	0.587669	0.508259	0.588622	0.566342	0.536991	0.733496	0.689312
Cell_0110	TFEB_TR	Glucose 17 mM + Glutamine 2.500000e-01 mM + EAA 1.000000e-01 X	1.35357	1.54149	1.83619	1.21315	0.947965	0.779039	1.72865	0.521186	3.25358	1.43969	2.61155	1.47268	0.970251	0.832921	1.31434	1.67542	0.810919	1.3153	0.743665	0.963345	1.64713	0.631862	2.11354	1.47826	2.1349	1.58107	1.34912	1.50177	1.52169	0.925636	1.57522	2.20957	0.816466	1.27016	0.936511	1.00193	1.28788	0.891759	1.36176	1.4867	1.50955	1.70147	2.49718	0.991902	1.50427	1.10471	0.75855
Cell_0110	FOXO_TR	Glucose 17 mM + Glutamine 2.500000e-01 mM + EAA 1.000000e-01 X	1.53405	1.98097	1.32837	1.23178	2.0272	1.11736	1.45807	1.36784	1.68408	2.14673	1.59143	1.94647	1.61479	1.09253	1.19843	1.50599	1.05899	0.940469	1.28527	1.41844	1.7537	1.19714	1.64336	1.52298	2.17141	1.25124	1.93557	1.79633	1.20533	1.20376	0.942872	2.10114	1.41193	1.39853	1.26987	1.99194	0.989294	1.33147	1.41795	1.42032	1.29446	1.24215	1.39742	1.28245	1.29557	1.7174	2.06149
Cell_0110	AMPKARt2	Glucose 17 mM + Glutamine 2.500000e-01 mM + EAA 1.000000e-01 X	0.549518	0.67268	0.519618	0.676558	0.613825	0.6615	0.559394	0.582524	0.712164	0.532232	0.483671	0.451995	0.555051	0.45367	0.54982	0.466986	0.561442	0.566802	0.652753	0.527845	0.632861	0.504547	0.645255	0.555649	0.584809	0.5708	0.598912	0.512666	0.66785	0.545342	0.582499	0.570307	0.556046	0.502068	0.5552	0.609049	0.676454	0.505728	0.612701	0.63603	0.577626	0.479739	0.577842	0.570894	0.54147	0.732721	0.683916
Cell_0111	TFEB_TR	Glucose 17 mM + Glutamine 2.500000e-01 mM + EAA 1.000000e-01 X	1.00946	1.77678	1.78131	1.47907	0.948036	0.771645	1.65118	0.533147	2.81786	1.48942	2.82141	1.50476	1.00049	0.845363	1.44542	1.59846	0.830642	1.03819	0.766599	1.06442	1.57658	0.604427	2.86245	1.50838	2.20666	1.51303	0.972832	1.28421	1.44508	1.05054	1.51271	2.21815	0.818254	1.25985	0.939169	1.08967	1.33486	0.88479	1.34058	1.33412	1.48963	1.69405	2.38868	0.988364	1.46195	1.151	0.762454
Cell_0111	FOXO_TR	Glucose 17 mM + Glutamine 2.500000e-01 mM + EAA 1.000000e-01 X	1.56327	2.00822	1.31508	1.24435	2.0767	1.09774	1.43884	1.29356	1.65049	2.18594	1.6345	1.95118	1.59781	1.07838	1.18209	1.53865	1.09766	0.917315	1.26575	1.43007	1.68887	1.15927	1.7226	1.47605	1.97099	1.21048	1.35119	1.83771	1.15761	1.19622	0.934719	2.17368	1.38949	1.39758	1.31917	2.28344	0.966912	1.35215	1.34653	1.50597	1.29317	1.21818	1.37342	1.3092	1.23655	1.70897	2.01908
Cell_0111	AMPKARt2	Glucose 17 mM + Glutamine 2.500000e-01 mM + EAA 1.000000e-01 X	0.568354	0.66752	0.536089	0.677873	0.612547	0.661883	0.553058	0.576823	0.713035	0.548894	0.486591	0.446765	0.561262	0.44638	0.552748	0.46467	0.563766	0.55372	0.64557	0.522378	0.637619	0.488412	0.652831	0.561366	0.581338	0.576831	0.671865	0.520744	0.66829	0.565731	0.56889	0.577569	0.552373	0.50005	0.553856	0.593782	0.677796	0.495625	0.596472	0.641494	0.575237	0.480535	0.560693	0.582184	0.53224	0.732731	0.677284
Cell_0112	TFEB_TR	Glucose 17 mM + Glutamine 2.500000e-01 mM + EAA 1.000000e-01 X	1.00362	1.69986	1.72426	1.17512	0.976028	0.762513	1.34872	0.557635	1.7987	1.44954	2.91745	1.50432	1.03412	0.864839	1.43709	1.46173	0.894747	1.0808	0.767878	0.970877	1.48314	0.60267	3.88262	1.38957	2.44448	1.61072	1.04628	1.0433	1.45904	1.14024	1.45593	1.86749	0.841784	1.22591	0.953429	1.18501	1.48841	0.822353	1.49359	1.20003	1.47949	1.64922	2.46	1.04298	1.44429	1.10446	0.733502
Cell_0112	FOXO_TR	Glucose 17 mM + Glutamine 2.500000e-01 mM + EAA 1.000000e-01 X	1.57185	2.112	1.30163	1.25913	2.05794	1.07918	1.55083	1.28368	1.59211	2.1963	1.63959	1.96824	1.60212	1.06402	1.14957	1.50585	1.09495	0.910589	1.27314	1.4373	1.64568	1.14226	1.93671	1.56171	1.86604	1.17421	1.36905	1.82353	1.18955	1.18529	0.913413	2.21298	1.39807	1.41963	1.36731	2.40657	0.93641	1.34927	1.29591	1.55045	1.30469	1.17922	1.36462	1.34039	1.18984	1.73662	2.03251
Cell_0112	AMPKARt2	Glucose 17 mM + Glutamine 2.500000e-01 mM + EAA 1.000000e-01 X	0.561711	0.664766	0.543702	0.686063	0.606012	0.666367	0.542963	0.573381	0.705895	0.552462	0.489872	0.45102	0.564629	0.431987	0.552116	0.484652	0.558249	0.541479	0.6337	0.52328	0.641857	0.49957	0.635519	0.566142	0.583552	0.577982	0.676592	0.537719	0.666435	0.546701	0.572704	0.577107	0.569684	0.497963	0.558569	0.561387	0.68605	0.505697	0.59946	0.65716	0.597107	0.481607	0.556591	0.597279	0.5632	0.736317	0.682947
Cell_0113	TFEB_TR	Glucose 17 mM + Glutamine 2.500000e-01 mM + EAA 1.000000e-01 X	1.42916	1.72335	1.7028	0.810368	0.978574	0.791413	1.14674	0.580221	1.63119	1.00912	2.98518	1.46821	1.07571	0.910295	1.1644	1.62862	0.933121	1.36038	0.728636	0.842804	1.41737	0.608034	3.85875	1.444	2.68514	1.74609	1.2736	1.10294	1.54739	1.11709	1.51329	1.82504	0.718695	1.17108	0.999287	1.28014	1.51267	0.847589	1.63103	1.32019	0.927566	1.62669	2.54029	1.14474	1.39225	1.07851	0.711302
Cell_0113	FOXO_TR	Glucose 17 mM + Glutamine 2.500000e-01 mM + EAA 1.000000e-01 X	1.62052	2.10237	1.30184	1.23884	1.97669	1.05756	1.63724	1.29601	1.5543	1.45598	1.66523	1.99652	1.62403	1.11326	1.1586	1.51201	1.05733	0.923026	1.30609	1.40239	1.59472	1.13526	1.98103	1.58177	1.88902	1.12931	1.41756	1.73251	1.25121	1.11907	0.93788	2.23172	1.25997	1.43571	1.34916	2.34339	0.983622	1.35559	1.25042	1.51179	2.41885	1.1303	1.37751	1.35378	1.2304	1.70877	2.07794
Cell_0113	AMPKARt2	Glucose 17 mM + Glutamine 2.500000e-01 mM + EAA 1.000000e-01 X	0.553174	0.66954	0.543822	0.685301	0.574462	0.646675	0.56128	0.582375	0.714622	0.506575	0.490599	0.466597	0.56512	0.426577	0.547019	0.496308	0.550443	0.537389	0.629808	0.544171	0.650512	0.505666	0.616549	0.576648	0.580838	0.590678	0.678504	0.53064	0.671873	0.510724	0.586406	0.56337	0.58843	0.4989	0.566218	0.533542	0.679493	0.505233	0.608745	0.668209	0.640463	0.486021	0.549085	0.599588	0.622801	0.734063	0.683552
Cell_0114	TFEB_TR	Glucose 17 mM + Glutamine 2.500000e-01 mM + EAA 1.000000e-01 X	1.47998	1.72674	1.67112	1.02943	1.00918	0.828034	1.18329	0.583958	1.65365	0.99231	3.01238	1.4218	1.07399	0.925723	1.21269	1.69639	0.846538	1.40818	0.771403	0.895831	1.37623	0.603396	3.2043	1.61874	2.64819	1.91064	1.33773	1.16616	1.5602	1.11876	1.6311	2.15495	0.654502	1.14998	1.04218	1.44679	1.65091	0.856189	1.68128	1.51632	0.910589	1.60658	2.4258	1.18021	1.33766	1.19153	0.704185
Cell_0114	FOXO_TR	Glucose 17 mM + Glutamine 2.500000e-01 mM + EAA 1.000000e-01 X	1.73594	2.08351	1.30334	1.23354	1.87615	1.04191	1.58952	1.29393	1.53672	1.52557	1.65488	2.02078	1.61512	1.15225	1.17049	1.54223	1.0199	0.920715	1.38709	1.34911	1.52355	1.09838	1.86437	1.49123	1.88394	1.10546	1.43768	1.67908	1.28762	1.01123	1.00485	2.23248	1.23472	1.41967	1.29814	2.27435	1.05783	1.37395	1.18496	1.45484	2.41646	1.08347	1.38475	1.33461	1.28332	1.61642	2.13571
Cell_0114	AMPKARt2	Glucose 17 mM + Glutamine 2.500000e-01 mM + EAA 1.000000e-01 X	0.553921	0.678802	0.544483	0.677522	0.549628	0.630209	0.585614	0.583223	0.719739	0.496736	0.48999	0.468949	0.567181	0.443883	0.543195	0.48701	0.557845	0.539065	0.604715	0.544251	0.658502	0.50508	0.622282	0.584601	0.575125	0.595779	0.6846	0.514997	0.676676	0.492514	0.592828	0.56263	0.583668	0.513381	0.571217	0.522721	0.676274	0.517667	0.601505	0.672728	0.646292	0.507029	0.542975	0.583921	0.633443	0.735055	0.690555
Cell_0115	TFEB_TR	Glucose 17 mM + Glutamine 2.500000e-01 mM + EAA 1.000000e-01 X	1.17426	1.5684	1.63231	1.2294	1.15656	0.858764	1.21422	0.582155	1.75543	1.05501	2.8942	1.39591	1.01031	0.940838	1.60225	1.50455	0.713426	1.33891	0.80756	0.950838	1.37124	0.611426	2.97619	1.74461	2.6909	1.85676	1.13232	1.10032	1.45781	1.20815	1.62385	2.20933	0.810834	1.15726	1.02508	1.52846	1.87342	0.811562	1.6917	1.45225	0.863215	1.63176	2.24458	1.14839	1.36491	1.25796	0.689503
Cell_0115	FOXO_TR	Glucose 17 mM + Glutamine 2.500000e-01 mM + EAA 1.000000e-01 X	1.81626	2.17799	1.3163	1.25269	1.80392	1.02898	1.51509	1.26504	1.54674	1.54907	1.56476	2.02648	1.59066	1.16028	1.18673	1.52806	1.00826	0.916787	1.50907	1.34523	1.49005	1.06574	1.87295	1.70703	1.84509	1.08236	1.42183	1.7054	1.35731	1.04567	1.05359	2.25897	1.42697	1.42459	1.2814	2.1471	1.04448	1.3907	1.13869	1.41221	2.35598	1.07958	1.38082	1.32522	1.24344	1.5758	2.18119
Cell_0115	AMPKARt2	Glucose 17 mM + Glutamine 2.500000e-01 mM + EAA 1.000000e-01 X	0.541774	0.671943	0.541556	0.673467	0.560832	0.652699	0.574545	0.580328	0.715132	0.501457	0.498385	0.456986	0.574025	0.454323	0.541574	0.472753	0.558214	0.542587	0.552256	0.516412	0.658645	0.512896	0.641925	0.687483	0.578512	0.581622	0.685985	0.514258	0.671265	0.506228	0.595775	0.578612	0.56831	0.523578	0.579028	0.531904	0.694644	0.534908	0.595928	0.676466	0.640522	0.515606	0.54087	0.576957	0.611131	0.744101	0.70626
Cell_0116	TFEB_TR	Glucose 17 mM + Glutamine 2.500000e-01 mM + EAA 1.000000e-01 X	1.1292	1.74005	1.59301	0.97493	1.29209	0.903199	1.00184	0.599748	2.10286	1.12883	2.67738	1.38764	0.991126	0.970162	1.6779	1.61159	0.707067	1.23843	0.82931	0.881649	1.35205	0.624463	3.16688	2.39827	2.88693	1.51368	0.973448	1.04496	1.68242	1.24438	1.53639	1.88393	0.91561	1.17148	1.02894	1.60761	1.87202	0.85075	1.78223	1.28444	0.879242	1.66643	2.30718	1.11888	1.30591	1.16222	0.706999
Cell_0116	FOXO_TR	Glucose 17 mM + Glutamine 2.500000e-01 mM + EAA 1.000000e-01 X	1.79613	2.21009	1.32462	1.25557	1.80039	0.992309	1.44918	1.20349	1.56395	1.62012	1.66658	2.06914	1.58087	1.1717	1.2547	1.5375	1.02637	0.946275	1.55195	1.42703	1.48382	1.04188	1.96457	1.61488	1.84924	1.028	1.46488	1.71519	1.41258	1.16753	1.05354	2.32182	1.50742	1.45001	1.31329	1.97001	0.981624	1.39193	1.16643	1.3649	2.33504	1.084	1.40513	1.31557	1.23111	1.64798	2.14567
Cell_0116	AMPKARt2	Glucose 17 mM + Glutamine 2.500000e-01 mM + EAA 1.000000e-01 X	0.53391	0.650793	0.537805	0.675875	0.575798	0.667723	0.565219	0.591279	0.719768	0.519315	0.507914	0.443907	0.586896	0.446348	0.537279	0.49509	0.549735	0.547103	0.520734	0.512053	0.658088	0.521578	0.649618	0.686502	0.578605	0.576138	0.682364	0.513298	0.657253	0.532585	0.5939	0.586123	0.561673	0.513053	0.583734	0.539778	0.696227	0.519304	0.606338	0.671373	0.643454	0.524874	0.524504	0.593003	0.610412	0.745977	0.682347
Cell_0117	TFEB_TR	Glucose 17 mM + Glutamine 2.500000e-01 mM + EAA 1.000000e-01 X	1.20546	1.88431	1.63733	0.867063	1.34265	0.967195	0.993061	0.647889	2.06385	1.13684	2.59203	1.37398	1.04642	0.957938	1.39318	1.95897	0.794073	1.05293	1.0452	0.927875	1.26914	0.62275	3.2201	2.52714	2.82419	1.39887	0.98447	1.05338	2.14944	1.12826	1.53974	1.69824	0.870544	1.18755	1.05175	1.92629	1.76259	1.02637	1.88644	1.37172	0.90199	1.57537	2.50872	1.10162	1.13682	1.14545	0.712587
Cell_0117	FOXO_TR	Glucose 17 mM + Glutamine 2.500000e-01 mM + EAA 1.000000e-01 X	1.76538	2.1013	1.38156	1.24028	1.80399	0.97111	1.24073	1.16357	1.55391	1.72564	1.89106	2.14343	1.59552	1.15259	1.33946	1.59462	1.01945	0.980907	1.50928	1.51567	1.43861	1.0034	1.92334	1.60252	1.81291	0.961788	1.60569	1.66754	1.40252	1.14929	1.04869	2.33378	1.44786	1.44268	1.34631	1.82998	0.982407	1.55714	1.21336	1.33553	2.32357	1.0583	1.43279	1.28645	1.31032	1.75557	2.1022
Cell_0117	AMPKARt2	Glucose 17 mM + Glutamine 2.500000e-01 mM + EAA 1.000000e-01 X	0.536933	0.640146	0.540391	0.684147	0.561173	0.650023	0.531147	0.598256	0.722369	0.521161	0.518323	0.440292	0.583865	0.445597	0.530458	0.538823	0.548294	0.549858	0.517945	0.536194	0.666572	0.516809	0.641749	0.688934	0.57158	0.587889	0.689049	0.516347	0.654325	0.545932	0.589783	0.584646	0.561478	0.502024	0.57804	0.526101	0.675871	0.56115	0.615278	0.665193	0.661106	0.588327	0.510623	0.597636	0.619421	0.74217	0.639097
Cell_0118	TFEB_TR	Glucose 17 mM + Glutamine 2.500000e-01 mM + EAA 1.000000e-01 X	1.01128	1.51563	1.78846	1.10162	1.43985	1.05592	1.05553	0.681991	2.11296	1.13091	2.66355	1.35591	1.06164	0.938173	1.20872	2.00584	0.824518	0.970453	1.29644	1.08313	1.23017	0.620686	2.91846	2.57655	2.59974	1.71606	1.06878	1.10927	2.03344	1.07424	1.48882	1.84945	0.865658	1.22151	1.02686	2.14984	1.59965	1.01495	1.81006	1.54607	0.856951	1.43838	2.47037	1.09781	1.08342	1.22261	0.694398
Cell_0118	FOXO_TR	Glucose 17 mM + Glutamine 2.500000e-01 mM + EAA 1.000000e-01 X	1.80053	2.03533	1.5176	1.25052	1.76255	1.00849	1.22031	1.15165	1.56927	1.73968	1.79838	2.19959	1.60268	1.11315	1.36177	1.61319	0.987969	0.973983	1.48032	1.55774	1.42165	0.986151	1.81997	1.62954	1.69952	0.924628	1.7329	1.64413	1.40252	1.10354	1.04251	2.30586	1.42757	1.45804	1.32042	1.70619	1.00575	1.51352	1.20463	1.30826	2.22091	1.05566	1.42048	1.28062	1.31708	1.78408	2.17958
Cell_0118	AMPKARt2	Glucose 17 mM + Glutamine 2.500000e-01 mM + EAA 1.000000e-01 X	0.534708	0.647821	0.544812	0.689069	0.535291	0.640524	0.534143	0.58606	0.718134	0.512795	0.529488	0.447311	0.565322	0.452418	0.530929	0.531701	0.54744	0.548073	0.512951	0.548343	0.67113	0.502058	0.634757	0.689264	0.578466	0.595089	0.690217	0.531305	0.671774	0.535385	0.601173	0.588674	0.553332	0.50289	0.577493	0.511769	0.674188	0.561141	0.606404	0.670618	0.666972	0.662326	0.515869	0.577641	0.625383	0.741732	0.636922
Cell_0119	TFEB_TR	Glucose 17 mM + Glutamine 2.500000e-01 mM + EAA 1.000000e-01 X	0.865669	1.48511	1.87733	1.18842	1.49851	1.12602	1.09158	0.685913	2.59781	1.11909	2.69845	1.36188	1.04401	0.952543	1.23878	1.99896	0.819184	1.017	1.33136	1.07603	1.14237	0.624099	2.83274	2.66337	2.51007	1.86636	1.14062	1.14392	1.53691	1.20252	1.32271	1.97923	0.881729	1.33242	1.02397	2.06798	1.40714	0.95055	1.76134	1.46821	0.841539	1.43107	2.25406	1.09946	1.14795	1.15245	0.75625
Cell_0119	FOXO_TR	Glucose 17 mM + Glutamine 2.500000e-01 mM + EAA 1.000000e-01 X	1.84163	2.0824	1.58223	1.28056	1.72558	1.0425	1.24276	1.12921	1.61931	1.69199	1.54613	2.31021	1.57592	1.11186	1.31519	1.61883	1.02892	0.951546	1.40628	1.60303	1.83102	0.980758	1.82368	1.58956	1.64062	0.92587	1.70572	1.65975	1.39629	1.22918	0.987613	2.32608	1.37943	1.59559	1.26906	1.61923	0.9732	1.5025	1.19721	1.24676	2.10049	1.08782	1.40728	1.28903	1.23289	1.75228	2.30736
Cell_0119	AMPKARt2	Glucose 17 mM + Glutamine 2.500000e-01 mM + EAA 1.000000e-01 X	0.543419	0.658569	0.547584	0.681648	0.528381	0.639569	0.548781	0.577061	0.72251	0.526394	0.514584	0.444136	0.566101	0.45175	0.537791	0.49037	0.559301	0.550554	0.508559	0.540886	0.746003	0.495194	0.628135	0.687678	0.592675	0.589581	0.674362	0.534314	0.676969	0.505707	0.615909	0.58972	0.529979	0.509436	0.586911	0.516769	0.683113	0.561497	0.593315	0.671552	0.657886	0.667102	0.516061	0.578574	0.634004	0.739231	0.645451
Cell_0120	TFEB_TR	Glucose 17 mM + Glutamine 2.500000e-01 mM + EAA 1.000000e-01 X	1.0627	1.93022	1.875	1.19343	1.39676	1.10611	1.05467	0.721825	2.38897	1.05646	2.7193	1.3912	1.09644	0.965334	1.40298	2.27818	0.844133	1.15125	1.33686	0.925947	1.20629	0.622961	3.43088	2.60639	2.59211	1.56434	1.05825	1.12926	1.49029	1.21581	1.3255	1.75807	0.877675	1.44156	1.04164	2.13844	1.61786	0.969221	1.86759	1.29958	0.877639	1.47211	2.26631	1.1075	1.15783	1.12732	0.780102
Cell_0120	FOXO_TR	Glucose 17 mM + Glutamine 2.500000e-01 mM + EAA 1.000000e-01 X	1.86266	2.13032	1.53405	1.28263	1.71895	1.02687	1.27647	1.14747	1.61971	1.67154	1.53635	2.48285	1.594	1.13178	1.29571	1.66745	1.13566	0.960297	1.25175	1.62711	1.84471	0.945016	1.92321	1.53341	1.67441	0.922293	1.54592	1.64945	1.36564	1.38439	0.960396	2.38127	1.31861	1.79988	1.26148	1.57095	0.940048	1.54222	1.24217	1.20057	2.0709	1.12096	1.40903	1.29504	1.2086	1.76034	2.35449
Cell_0120	AMPKARt2	Glucose 17 mM + Glutamine 2.500000e-01 mM + EAA 1.000000e-01 X	0.553551	0.650872	0.554275	0.678939	0.535404	0.623331	0.560717	0.587473	0.726206	0.542432	0.491328	0.429565	0.572064	0.451592	0.538589	0.479589	0.585601	0.559741	0.516534	0.527941	0.752574	0.503248	0.61586	0.688697	0.601682	0.581371	0.671833	0.536828	0.661996	0.482175	0.61637	0.580651	0.51221	0.517391	0.595275	0.52472	0.674573	0.55471	0.601218	0.662261	0.658864	0.641817	0.507489	0.602627	0.635676	0.736114	0.637781
Cell_0121	TFEB_TR	Glucose 17 mM + Glutamine 2.500000e-01 mM + EAA 1.000000e-01 X	1.19744	1.99775	1.90233	1.39887	1.36602	1.04904	1.03569	0.771577	1.64539	1.02712	2.66939	1.41446	1.15324	0.971696	1.55559	2.55097	0.901501	1.36386	1.37651	0.841728	1.18265	0.631725	3.71592	2.68893	2.71958	1.38452	0.891923	1.07224	1.61639	1.05363	1.47002	1.47919	0.9577	1.47337	1.00876	2.40241	1.99733	1.00641	1.83074	1.31724	0.873849	1.44358	2.47052	1.17494	1.05987	1.33978	0.711869
Cell_0121	FOXO_TR	Glucose 17 mM + Glutamine 2.500000e-01 mM + EAA 1.000000e-01 X	1.8864	2.10817	1.50958	1.4681	1.71041	1.0125	1.29194	1.19054	1.60781	1.62755	1.59925	2.55988	1.67875	1.13254	1.35127	1.65691	1.21716	0.992514	1.15767	1.58311	1.84804	0.935535	2.00473	1.53321	1.67815	0.916706	1.41687	1.65584	1.41522	1.39189	1.04935	2.42906	1.34149	1.9116	1.30161	1.48563	0.951894	1.58963	1.2728	1.2092	2.13514	1.16252	1.40954	1.34362	1.22286	1.78498	2.30293
Cell_0121	AMPKARt2	Glucose 17 mM + Glutamine 2.500000e-01 mM + EAA 1.000000e-01 X	0.542647	0.630285	0.563824	0.501609	0.540803	0.61516	0.560114	0.600917	0.722171	0.54004	0.516398	0.427255	0.557426	0.460814	0.535906	0.481885	0.586486	0.558743	0.530648	0.52302	0.761036	0.508363	0.614646	0.689023	0.60895	0.585195	0.687802	0.56326	0.664412	0.489059	0.624639	0.572067	0.516047	0.522895	0.403976	0.530418	0.665392	0.556307	0.621864	0.658957	0.666696	0.647744	0.503773	0.592837	0.63623	0.734699	0.634065
Cell_0122	TFEB_TR	Glucose 17 mM + Glutamine 2.500000e-01 mM + EAA 1.000000e-01 X	1.0635	2.05645	1.93095	0.940237	1.48479	1.05338	1.09798	0.757018	1.6216	1.07377	2.25526	1.42533	1.1115	0.967745	1.43834	2.78404	0.987231	1.25837	1.24307	1.02207	1.13772	0.660791	2.82206	2.77538	2.64221	1.59313	0.899532	1.00417	1.44312	1.00833	1.49715	1.57884	1.01364	1.56639	1.11332	2.4942	1.85272	0.913091	1.84912	1.40653	0.831792	1.41392	2.43976	1.27926	0.945006	1.3905	0.816313
Cell_0122	FOXO_TR	Glucose 17 mM + Glutamine 2.500000e-01 mM + EAA 1.000000e-01 X	1.86411	2.01477	1.50334	1.41666	1.69176	1.03184	1.30605	1.15736	1.65144	1.56435	1.55031	2.56243	1.69855	1.1224	1.39409	1.54729	1.2766	1.03464	1.16152	1.5538	1.83463	0.982527	1.99039	1.52222	1.62142	0.946505	1.40349	1.72644	1.49908	1.29337	1.12948	2.44916	1.32506	1.87714	1.35882	1.39636	0.971218	1.61404	1.26439	1.24654	2.18484	1.18269	1.43805	1.38524	1.18256	1.78669	2.208
Cell_0122	AMPKARt2	Glucose 17 mM + Glutamine 2.500000e-01 mM + EAA 1.000000e-01 X	0.541018	0.627266	0.56535	0.513673	0.550769	0.62666	0.558755	0.599208	0.721861	0.544124	0.557833	0.425965	0.550006	0.476878	0.539038	0.468818	0.569836	0.55053	0.544768	0.540532	0.760084	0.503337	0.625345	0.689915	0.599886	0.598678	0.69464	0.582425	0.678327	0.511845	0.644614	0.567747	0.5128	0.532627	0.395873	0.543093	0.671001	0.571627	0.626729	0.658606	0.6637	0.657952	0.501304	0.558743	0.645083	0.730516	0.611487
Cell_0123	TFEB_TR	Glucose 17 mM + Glutamine 2.500000e-01 mM + EAA 1.000000e-01 X	1.11842	2.45379	1.92407	1.09548	1.51231	1.07348	1.10774	0.726725	2.10931	1.09859	1.83796	1.43369	1.06349	0.939604	1.29277	3.10707	1.04993	0.773668	1.0598	1.35673	1.14055	0.679831	2.0953	2.56067	2.45546	1.76557	0.922424	1.0741	1.25796	1.06486	1.49109	1.78085	0.937727	1.66239	1.23665	2.54351	1.58941	0.880251	2.21199	1.40814	0.847217	1.41269	2.25355	1.35653	0.975046	1.09793	1.01579
Cell_0123	FOXO_TR	Glucose 17 mM + Glutamine 2.500000e-01 mM + EAA 1.000000e-01 X	1.82307	1.88785	1.46514	1.47069	1.6696	1.05327	1.30929	1.1213	1.66717	1.61646	1.56803	2.64233	1.62895	1.13398	1.36465	1.4901	1.31915	1.14436	1.15037	1.58217	1.8067	1.00656	1.94201	1.52505	1.60043	0.955329	1.43325	1.72633	1.51622	1.16842	1.08289	2.4283	1.25627	1.78724	1.37225	1.34988	0.981047	1.61196	1.25472	1.2715	2.11648	1.14999	1.45893	1.34943	1.14484	1.82152	2.15355
Cell_0123	AMPKARt2	Glucose 17 mM + Glutamine 2.500000e-01 mM + EAA 1.000000e-01 X	0.553729	0.639318	0.556931	0.516233	0.566053	0.632483	0.564541	0.588732	0.721022	0.553147	0.550313	0.413984	0.553267	0.493386	0.547331	0.455442	0.574766	0.616998	0.554195	0.56338	0.751778	0.510672	0.622237	0.695904	0.583212	0.596202	0.692874	0.580033	0.675333	0.517179	0.647507	0.570749	0.492485	0.544123	0.405286	0.547599	0.67654	0.578486	0.617084	0.65316	0.661976	0.652842	0.508645	0.553882	0.64598	0.729653	0.577733
Cell_0124	TFEB_TR	Glucose 17 mM + Glutamine 2.500000e-01 mM + EAA 1.000000e-01 X	1.42422	2.48277	1.94993	1.12245	1.44701	1.04222	1.05293	0.768634	2.36131	1.10109	1.9581	1.44762	1.10741	0.93162	1.48665	3.23957	1.07283	0.802169	1.0688	1.34676	1.17451	0.668787	2.70203	2.36394	2.36898	1.70575	0.807311	1.19283	1.28735	1.06313	1.58157	1.76074	0.948578	1.58717	1.21984	2.58387	1.61513	0.992743	2.36363	1.43038	0.892006	1.35522	2.26589	1.46531	1.13063	0.917091	1.00194
Cell_0124	FOXO_TR	Glucose 17 mM + Glutamine 2.500000e-01 mM + EAA 1.000000e-01 X	1.86505	1.80123	1.47193	1.50055	1.63089	1.04799	1.28911	1.19161	1.63637	1.719	1.65294	2.68974	1.57263	1.16954	1.30493	1.53425	1.30117	1.08526	1.08643	1.6345	1.78145	0.983841	1.95902	1.59458	1.60159	0.923369	1.42853	1.64406	1.56709	1.04467	1.02414	2.42108	1.28568	1.72052	1.33853	1.30225	0.97716	1.57457	1.24166	1.25151	2.05969	1.10141	1.42316	1.32229	1.16971	1.8366	2.13855
Cell_0124	AMPKARt2	Glucose 17 mM + Glutamine 2.500000e-01 mM + EAA 1.000000e-01 X	0.558532	0.639249	0.547785	0.502352	0.576447	0.63181	0.566506	0.586364	0.717601	0.542722	0.532582	0.41616	0.544835	0.49941	0.555628	0.444928	0.580129	0.626618	0.561286	0.557005	0.752589	0.530836	0.60977	0.6959	0.589907	0.579635	0.69222	0.579969	0.675428	0.504408	0.636722	0.587872	0.49132	0.539719	0.430626	0.539401	0.680637	0.580775	0.610264	0.651987	0.666827	0.656733	0.525825	0.558911	0.638356	0.732292	0.586413
Cell_0125	TFEB_TR	Glucose 17 mM + Glutamine 2.500000e-01 mM + EAA 1.000000e-01 X	1.0175	2.244	2.0021	0.860582	1.42031	1.02678	1.06183	0.829815	2.16845	1.10159	2.13876	1.47296	1.15866	0.958437	1.55414	3.21333	1.0913	0.830125	1.16819	1.0833	1.19818	0.657657	3.23751	2.42795	2.24738	1.56016	0.916829	1.11723	1.43932	1.04681	1.72107	1.36974	1.09725	1.53207	1.12912	2.34232	1.45607	1.04106	2.11033	1.52123	0.832075	1.24046	2.26666	1.64931	1.24197	1.10756	0.931832
Cell_0125	FOXO_TR	Glucose 17 mM + Glutamine 2.500000e-01 mM + EAA 1.000000e-01 X	1.13614	1.77738	1.54015	1.47281	1.5965	1.04939	1.27179	1.27239	1.64282	1.66181	1.62287	2.57104	1.54188	1.17997	1.28391	1.55654	1.25575	1.06522	1.03471	1.72759	1.75897	0.960924	1.94638	1.6283	1.56258	0.935542	1.4124	1.70861	1.64893	0.968099	1.05026	2.1706	1.31781	1.69189	1.33312	1.28024	0.96112	1.55696	1.23983	1.22563	2.16297	1.05337	1.41723	1.35236	1.21057	1.79086	2.09443
Cell_0125	AMPKARt2	Glucose 17 mM + Glutamine 2.500000e-01 mM + EAA 1.000000e-01 X	0.59366	0.633641	0.543127	0.486602	0.585797	0.628916	0.554826	0.593661	0.723084	0.529664	0.55119	0.429617	0.537414	0.495344	0.554984	0.437001	0.567893	0.634557	0.570854	0.533771	0.760413	0.532541	0.612019	0.686611	0.599745	0.580206	0.684408	0.576497	0.688929	0.491925	0.63628	0.65005	0.507763	0.539198	0.459616	0.54497	0.688193	0.587225	0.607672	0.660027	0.658891	0.667725	0.529086	0.541298	0.642844	0.729489	0.612516
Cell_0126	TFEB_TR	Glucose 17 mM + Glutamine 2.500000e-01 mM + EAA 1.000000e-01 X	1.12922	2.28453	1.99471	0.926938	1.39926	1.07575	1.08108	0.838547	1.64946	1.0248	2.10335	1.49595	1.16091	0.98926	1.31066	3.29131	1.00316	0.837051	1.21147	1.12733	1.20413	0.670603	2.8086	2.99709	2.20971	1.48325	1.16049	1.08018	1.51615	1.01205	1.90021	1.51358	1.12792	1.58803	1.12963	2.21512	1.26718	1.10659	2.09598	1.4842	0.815861	1.22792	2.11933	1.8361	1.3342	1.34604	1.00359
Cell_0126	FOXO_TR	Glucose 17 mM + Glutamine 2.500000e-01 mM + EAA 1.000000e-01 X	1.14256	1.7773	1.58566	1.53044	1.61597	1.09884	1.23886	1.2572	1.65463	1.55023	1.53954	2.48102	1.51802	1.15695	1.35586	1.53955	1.23543	1.19746	1.0451	1.79665	1.74682	0.95196	1.80487	1.61008	1.53024	0.967219	1.41985	1.87764	1.59362	0.972224	1.09239	2.20644	1.23538	1.75146	1.36935	1.325	0.969932	1.60831	1.2554	1.23402	2.27558	1.04001	1.47072	1.36265	1.22854	1.87039	2.0495
Cell_0126	AMPKARt2	Glucose 17 mM + Glutamine 2.500000e-01 mM + EAA 1.000000e-01 X	0.58535	0.64188	0.545967	0.495731	0.595829	0.612593	0.54525	0.598696	0.731083	0.530871	0.565392	0.432894	0.536279	0.495439	0.554625	0.441357	0.564751	0.637982	0.573715	0.521077	0.755877	0.519178	0.619845	0.687021	0.593507	0.595535	0.676494	0.572451	0.689365	0.480135	0.642162	0.656622	0.510733	0.562424	0.473664	0.56465	0.680018	0.575673	0.609042	0.674322	0.643591	0.66864	0.524355	0.527903	0.6568	0.728158	0.614076
Cell_0127	TFEB_TR	Glucose 17 mM + Glutamine 2.500000e-01 mM + EAA 1.000000e-01 X	1.14686	2.37867	1.90834	1.05862	1.4087	1.11112	1.06813	0.868646	1.55292	0.983893	2.34221	1.49028	1.22132	1.03209	0.632358	3.30501	0.776961	0.853091	1.25847	1.25236	1.23624	0.683248	2.76204	3.97676	2.35605	1.52348	1.07741	1.2333	1.40165	0.943039	2.0012	1.24342	1.05606	1.54608	1.14429	2.57232	1.41283	1.24979	2.32941	1.26697	1.00156	1.3707	2.18596	1.96766	1.39351	1.13505	1.05008
Cell_0127	FOXO_TR	Glucose 17 mM + Glutamine 2.500000e-01 mM + EAA 1.000000e-01 X	1.18652	1.78737	1.5766	1.60068	1.65759	1.13886	1.18952	1.18297	1.64039	1.60428	1.53885	2.54265	1.5178	1.14724	1.20318	1.56379	1.22284	1.31747	1.09722	1.73921	1.78235	0.950406	1.67684	1.65178	1.49611	0.940472	1.42153	1.90632	1.48358	0.980952	1.1169	2.22186	1.17557	1.88203	1.35268	1.35705	0.992848	1.68203	1.24171	1.22019	2.2722	1.10815	1.49037	1.35047	1.23509	1.57846	2.03078
Cell_0127	AMPKARt2	Glucose 17 mM + Glutamine 2.500000e-01 mM + EAA 1.000000e-01 X	0.5796	0.651557	0.554652	0.518855	0.60214	0.606819	0.555331	0.592032	0.730771	0.526992	0.549519	0.432778	0.535062	0.503364	0.440374	0.449992	0.567901	0.63857	0.568622	0.506913	0.742949	0.520737	0.617458	0.687621	0.595351	0.604516	0.682201	0.59083	0.678387	0.467867	0.641467	0.667188	0.507261	0.570742	0.464379	0.568836	0.659989	0.551609	0.61689	0.690401	0.634361	0.662852	0.528778	0.530022	0.662442	0.47643	0.613659
Cell_0128	TFEB_TR	Glucose 17 mM + Glutamine 2.500000e-01 mM + EAA 1.000000e-01 X	1.02296	2.36179	1.86825	0.87261	1.45523	1.08726	1.08999	0.927799	2.18894	1.08083	2.55739	1.45467	1.40853	1.08085	0.637958	3.35935	0.756039	0.887014	1.30875	1.10771	1.28147	0.671088	3.16829	4.07382	2.53589	1.45669	1.06243	1.2185	1.36277	0.985132	1.87933	1.0477	1.10101	1.4789	1.11473	2.69697	1.50282	1.16087	2.34371	1.11548	1.11347	1.47532	2.37418	2.0266	1.30446	1.32009	0.991492
Cell_0128	FOXO_TR	Glucose 17 mM + Glutamine 2.500000e-01 mM + EAA 1.000000e-01 X	1.20021	1.79286	1.59197	1.54705	1.64419	1.13449	1.21831	1.11219	1.67068	1.65724	1.55487	2.58398	1.51696	1.13985	1.23293	1.593	1.20152	1.26176	1.1377	1.65313	1.81366	0.934687	1.64953	1.73709	1.44226	0.91032	1.39525	1.87439	1.52102	0.931626	1.14166	2.11937	1.20001	1.91446	1.28899	1.32671	0.99038	1.74947	1.22805	1.17879	2.25183	1.17065	1.47782	1.35213	1.22997	1.59632	1.99205
Cell_0128	AMPKARt2	Glucose 17 mM + Glutamine 2.500000e-01 mM + EAA 1.000000e-01 X	0.600042	0.64793	0.552032	0.528048	0.606912	0.624066	0.569878	0.580791	0.727495	0.518346	0.525689	0.428139	0.536808	0.506336	0.565576	0.447499	0.560576	0.647022	0.569411	0.502373	0.74965	0.528377	0.615315	0.654658	0.603921	0.606164	0.681338	0.610764	0.672727	0.46224	0.640008	0.680287	0.510239	0.552252	0.450848	0.559572	0.665154	0.549576	0.624339	0.694647	0.618789	0.655333	0.529617	0.525446	0.656502	0.476106	0.616034
Cell_0129	TFEB_TR	Glucose 17 mM + Glutamine 2.500000e-01 mM + EAA 1.000000e-01 X	0.9796	2.30625	1.96852	0.767131	1.42434	1.06811	1.08037	0.869225	2.62155	1.03589	2.42714	1.43073	1.63867	1.10252	0.630783	3.72282	1.0452	0.928234	1.2395	1.03842	1.27405	0.662545	2.85598	3.2907	3.11156	1.28275	1.46636	1.1318	0.997563	1.14537	1.75064	1.18448	1.22898	1.52268	1.10374	2.2115	1.53242	0.918258	2.29601	1.14882	1.17981	1.48692	2.25428	2.05248	1.28109	1.69012	0.959941
Cell_0129	FOXO_TR	Glucose 17 mM + Glutamine 2.500000e-01 mM + EAA 1.000000e-01 X	1.16549	1.74704	1.69384	1.48796	1.58874	1.16768	1.29852	1.06872	1.72678	1.53711	1.53251	2.60574	1.50333	1.11436	1.19863	1.55836	1.18438	1.25326	1.13959	1.65632	1.76392	0.915015	1.61183	1.75429	1.4753	0.927259	1.36413	1.91939	1.95507	0.912947	1.13985	1.97186	1.24893	1.81579	1.27697	1.30356	0.998957	1.78919	1.25753	1.16487	2.20718	1.16173	1.4796	1.33517	1.20354	1.5574	1.96545
Cell_0129	AMPKARt2	Glucose 17 mM + Glutamine 2.500000e-01 mM + EAA 1.000000e-01 X	0.61462	0.645704	0.532451	0.528857	0.605974	0.623573	0.570164	0.584675	0.723772	0.527284	0.499555	0.419897	0.52308	0.495614	0.57244	0.440356	0.559118	0.647454	0.572354	0.531341	0.766368	0.529185	0.620414	0.602964	0.603028	0.598824	0.660815	0.607093	0.616163	0.469989	0.638175	0.675377	0.516913	0.549165	0.451328	0.566022	0.688803	0.561505	0.625523	0.684596	0.604824	0.650319	0.525243	0.518378	0.646787	0.464641	0.607523
Cell_0130	TFEB_TR	Glucose 17 mM + Glutamine 2.500000e-01 mM + EAA 1.000000e-01 X	1.03327	2.11145	2.03399	0.885242	1.36485	1.09392	1.09338	0.770779	2.26141	0.854347	2.62152	1.46655	1.76954	1.10705	0.632772	3.85614	1.16147	0.964086	1.10899	1.09667	1.26556	0.690385	2.5211	3.62496	3.80764	1.36122	1.63566	1.274	0.993063	1.19273	1.8255	1.23628	1.2835	1.52224	1.10266	1.9074	1.6446	0.902594	2.40052	1.21225	1.51938	1.54379	2.01342	2.09779	1.38557	1.60566	1.01624
Cell_0130	FOXO_TR	Glucose 17 mM + Glutamine 2.500000e-01 mM + EAA 1.000000e-01 X	1.15675	1.67063	1.74303	1.4999	1.55537	1.231	1.30702	1.06102	1.72062	1.43413	1.52722	2.73747	1.49908	1.11298	1.17249	1.49402	1.18385	1.37141	1.13381	1.68821	1.75637	0.946066	1.55315	1.68626	1.56619	0.937339	1.338	1.92798	2.01925	0.949337	1.12546	1.89644	1.3245	1.752	1.2978	1.32216	1.03196	1.75633	1.26547	1.14517	2.05286	1.18244	1.49116	1.29441	1.16994	1.48535	1.97806
Cell_0130	AMPKARt2	Glucose 17 mM + Glutamine 2.500000e-01 mM + EAA 1.000000e-01 X	0.599001	0.651566	0.520863	0.522925	0.60313	0.612641	0.563139	0.601541	0.721658	0.541564	0.477309	0.429641	0.491974	0.485225	0.522049	0.449137	0.568621	0.626454	0.569536	0.546366	0.75272	0.538779	0.621762	0.565928	0.600907	0.585305	0.653667	0.592546	0.611267	0.495329	0.626738	0.658662	0.530607	0.56457	0.460615	0.578811	0.692013	0.561897	0.620075	0.682191	0.611418	0.655076	0.533732	0.520736	0.643415	0.473228	0.606506
Cell_0131	TFEB_TR	Glucose 17 mM + Glutamine 2.500000e-01 mM + EAA 1.000000e-01 X	1.01456	1.87064	1.95485	0.92775	1.35659	1.10929	1.26537	0.850059	1.71812	0.956313	3.02151	0.990955	1.7426	1.11844	0.651569	3.37887	1.04075	0.944847	1.08598	1.02377	1.35214	0.714515	2.8752	4.76517	3.50812	1.52555	1.38176	1.28405	0.966142	1.09662	1.88357	1.13281	1.23179	1.45833	1.08656	2.17164	1.41728	1.03992	2.57189	1.19209	1.76486	1.63762	0.816089	2.08222	1.31607	1.49549	1.09304
Cell_0131	FOXO_TR	Glucose 17 mM + Glutamine 2.500000e-01 mM + EAA 1.000000e-01 X	1.19652	1.64717	1.64753	1.51728	1.5409	1.23103	1.30781	1.08691	1.67162	1.41497	1.52967	1.30668	1.48879	1.13514	1.20489	1.43939	1.20564	1.3657	1.15437	1.70469	1.92881	0.976344	1.56964	1.63114	1.59435	0.912531	1.3097	1.86703	2.01218	0.936859	1.1329	1.86671	1.35831	1.78653	1.28934	1.32553	1.03887	1.71608	1.24376	1.11187	1.88252	1.27661	1.13733	1.27002	1.12458	1.45886	1.95171
Cell_0131	AMPKARt2	Glucose 17 mM + Glutamine 2.500000e-01 mM + EAA 1.000000e-01 X	0.59641	0.6497	0.532274	0.507093	0.611606	0.627594	0.557361	0.611417	0.728721	0.538563	0.476031	0.685701	0.479551	0.491284	0.495059	0.466637	0.570086	0.621658	0.575547	0.526897	0.720133	0.543393	0.615929	0.532726	0.601967	0.58387	0.667039	0.580866	0.614548	0.518254	0.618152	0.663509	0.540031	0.572862	0.471954	0.566252	0.679466	0.563266	0.608376	0.693967	0.615005	0.659092	0.639234	0.522482	0.650719	0.493307	0.615992
Cell_0132	TFEB_TR	Glucose 17 mM + Glutamine 2.500000e-01 mM + EAA 1.000000e-01 X	1.05621	1.8266	1.96911	0.9055	1.28791	1.06128	1.32796	1.01686	1.73388	1.14997	2.85455	1.06367	1.66828	1.13424	0.667583	2.83066	1.0771	0.908606	1.12504	1.0464	1.49848	0.706394	2.97976	4.67033	2.84439	1.48631	1.3454	1.1363	0.962392	1.05473	1.82306	1.13964	1.16308	1.454	1.06307	2.44704	1.08578	1.10689	2.89037	1.10982	1.67784	1.75072	0.838698	2.03401	1.24941	1.73965	1.11988
Cell_0132	FOXO_TR	Glucose 17 mM + Glutamine 2.500000e-01 mM + EAA 1.000000e-01 X	1.25608	1.67758	1.61719	1.52461	1.48535	1.19263	1.34515	1.12023	1.65653	1.36238	1.50761	1.36312	1.46042	1.13334	1.24861	1.40777	1.24226	1.26887	1.16229	1.73046	2.14548	0.954371	1.65807	1.64749	1.60578	0.916841	1.28356	1.83738	1.97571	0.910438	1.14317	1.8784	1.3002	1.84937	1.28596	1.28811	1.03524	1.70174	1.25207	1.12061	1.8045	1.3621	1.11318	1.27618	1.066	1.47401	1.90055
Cell_0132	AMPKARt2	Glucose 17 mM + Glutamine 2.500000e-01 mM + EAA 1.000000e-01 X	0.610577	0.646215	0.549224	0.513514	0.618364	0.631402	0.549169	0.613883	0.735401	0.535648	0.488495	0.679825	0.492244	0.501152	0.499087	0.466483	0.561217	0.635491	0.589672	0.526796	0.705108	0.531681	0.617355	0.503676	0.603927	0.599967	0.663955	0.580175	0.621427	0.521265	0.622203	0.684419	0.522087	0.565955	0.481016	0.550348	0.677628	0.572137	0.603025	0.701064	0.601675	0.650468	0.653135	0.519264	0.658087	0.489591	0.614844
Cell_0133	TFEB_TR	Glucose 17 mM + Glutamine 2.500000e-01 mM + EAA 1.000000e-01 X	1.11533	1.94919	2.0985	0.897891	1.16256	1.00826	1.14687	1.11788	2.05718	1.04836	2.53872	1.07847	1.66868	1.13918	0.677139	2.60274	1.09705	0.918297	1.14452	1.26253	1.63221	0.739482	2.65997	4.075	3.15403	1.0803	1.4547	1.27563	0.985223	1.03669	1.86289	1.24168	1.16415	1.44275	1.04903	2.29545	1.17013	1.12263	3.16452	1.00826	1.71739	1.89129	0.830632	2.16753	1.41691	1.57248	1.10763
Cell_0133	FOXO_TR	Glucose 17 mM + Glutamine 2.500000e-01 mM + EAA 1.000000e-01 X	1.30391	1.67923	1.71208	1.51178	1.40268	1.18135	1.28445	1.13535	1.70031	1.28992	1.49566	1.38545	1.43903	1.11925	1.28273	1.40849	1.27649	1.30267	1.15518	1.73175	2.21237	1.00465	1.75312	1.6701	1.60334	2.55844	1.25711	1.83036	1.98187	0.951444	1.16288	1.90071	1.27133	1.85944	1.2998	1.24694	1.03885	1.63627	1.25659	1.11932	1.76911	1.39194	1.16033	1.29639	1.06687	1.45834	1.92785
Cell_0133	AMPKARt2	Glucose 17 mM + Glutamine 2.500000e-01 mM + EAA 1.000000e-01 X	0.610967	0.657919	0.550256	0.545537	0.613329	0.608599	0.534081	0.616212	0.731205	0.545257	0.499732	0.677649	0.506264	0.501757	0.535961	0.460962	0.556005	0.628588	0.589556	0.539005	0.69661	0.536568	0.628979	0.50129	0.604512	0.592023	0.64862	0.584423	0.624534	0.527862	0.621957	0.693409	0.486058	0.54365	0.473832	0.563194	0.685592	0.56982	0.613962	0.700769	0.595355	0.640232	0.664006	0.519428	0.65557	0.479103	0.607389
Cell_0134	TFEB_TR	Glucose 17 mM + Glutamine 2.500000e-01 mM + EAA 1.000000e-01 X	1.00786	1.98142	2.08237	0.783809	1.1844	1.03265	1.13011	1.18892	1.86812	0.960637	2.72948	1.07098	1.70186	1.1212	0.696161	2.66111	0.911778	0.918742	1.19343	1.30722	1.80918	0.836165	2.60767	4.0515	3.69817	0.889315	1.22592	1.36278	0.964386	0.95908	1.88273	1.31401	1.1651	1.39455	1.12308	1.98074	1.18002	1.19531	2.97305	0.960553	1.88532	1.89568	0.831184	2.33373	1.45418	1.2549	1.07039
Cell_0134	FOXO_TR	Glucose 17 mM + Glutamine 2.500000e-01 mM + EAA 1.000000e-01 X	1.28362	1.62026	1.72545	1.53332	1.40211	1.20122	1.19018	1.15021	1.77559	1.17193	1.51605	1.37136	1.43874	1.12626	1.32603	1.38935	1.28479	1.35549	1.18407	1.72377	2.1582	1.13081	1.81611	1.68227	1.53833	2.72935	1.23461	1.79801	2.00236	0.967207	1.19116	1.81621	1.3143	1.83034	1.2926	1.2453	1.0159	1.61722	1.2437	1.06563	1.70844	1.37539	1.18961	1.30283	1.1407	1.40582	1.98762
Cell_0134	AMPKARt2	Glucose 17 mM + Glutamine 2.500000e-01 mM + EAA 1.000000e-01 X	0.610848	0.674634	0.535473	0.547718	0.614385	0.610124	0.516286	0.622763	0.732525	0.540186	0.507041	0.688713	0.508214	0.504874	0.5687	0.470593	0.560346	0.623343	0.584578	0.534849	0.676866	0.54515	0.630795	0.504355	0.600131	0.616138	0.650987	0.575432	0.620401	0.544865	0.614307	0.691309	0.470956	0.532831	0.449568	0.578106	0.689114	0.568877	0.618257	0.703879	0.594409	0.639763	0.667013	0.525258	0.650978	0.48869	0.609931
Cell_0135	TFEB_TR	Glucose 17 mM + Glutamine 2.500000e-01 mM + EAA 1.000000e-01 X	1.00256	1.9235	2.04511	0.700751	1.4006	1.05122	1.32042	1.21581	0.772222	1.00978	2.97366	1.07145	1.66767	1.0894	0.723958	2.79234	0.854666	0.873682	1.23361	1.17774	2.1331	0.903356	2.82196	3.33795	3.63486	0.956101	1.05875	1.11578	0.930441	0.999019	1.65301	1.29806	1.11516	1.39058	1.28031	2.14184	0.98375	1.303	2.57632	2.04055	2.04257	1.77333	0.837546	2.22842	1.31624	1.35337	0.999109
Cell_0135	FOXO_TR	Glucose 17 mM + Glutamine 2.500000e-01 mM + EAA 1.000000e-01 X	1.2229	1.57106	1.70412	1.62673	1.48705	1.21309	1.22235	1.16277	2.03492	1.10817	1.54125	1.38869	1.45399	1.13975	1.36404	1.33691	1.25065	1.31408	1.16797	1.79902	2.12541	1.15873	1.81976	1.73349	1.51344	2.74231	1.23972	1.75616	1.99348	0.912742	1.17809	1.67893	1.34965	1.93071	1.29566	1.33049	0.998449	1.66841	1.28056	1.11889	1.64499	1.34587	1.17394	1.2954	1.18461	1.38325	1.96277
Cell_0135	AMPKARt2	Glucose 17 mM + Glutamine 2.500000e-01 mM + EAA 1.000000e-01 X	0.613136	0.683863	0.528492	0.503478	0.617921	0.62867	0.50464	0.63698	0.625115	0.526689	0.511622	0.698903	0.500022	0.511814	0.542201	0.470848	0.565945	0.638686	0.592858	0.543698	0.652634	0.526979	0.62449	0.497417	0.597655	0.616014	0.659873	0.56736	0.613421	0.548622	0.612756	0.694447	0.48937	0.543578	0.426054	0.57901	0.687046	0.578879	0.604187	0.619979	0.589997	0.64856	0.670449	0.53215	0.649963	0.507454	0.613816
Cell_0136	TFEB_TR	Glucose 17 mM + Glutamine 2.500000e-01 mM + EAA 1.000000e-01 X	1.17859	2.0223	2.12517	0.867706	1.59191	0.951376	1.30237	1.18284	0.723701	0.89994	2.67299	1.06481	1.58177	1.06382	0.73355	2.74209	0.9392	0.85716	1.24535	1.16268	2.50801	0.920045	3.09631	2.41418	3.59342	1.09073	1.32606	1.05202	0.977367	1.12949	1.49222	1.22803	1.12692	1.3888	1.37417	2.89726	1.10863	1.19461	2.43257	1.69975	2.41912	1.75755	0.828092	2.08801	1.32763	1.30599	0.966161
Cell_0136	FOXO_TR	Glucose 17 mM + Glutamine 2.500000e-01 mM + EAA 1.000000e-01 X	1.24576	1.60274	1.74399	1.61979	1.53763	1.16097	1.24916	1.12145	1.90684	1.22232	1.52971	1.44526	1.4626	1.13298	1.36984	1.3318	1.19676	1.33292	1.08701	1.90363	2.14857	1.12124	1.77616	1.7295	1.53727	2.66289	1.25209	1.70666	1.98943	0.887606	1.15498	1.666	1.36637	2.14982	1.33953	1.48393	0.997092	1.47258	1.32849	1.15491	1.62876	1.35052	1.20032	1.29184	1.18397	1.41987	1.89816
Cell_0136	AMPKARt2	Glucose 17 mM + Glutamine 2.500000e-01 mM + EAA 1.000000e-01 X	0.602469	0.682483	0.540858	0.466873	0.609368	0.628642	0.499243	0.638019	0.623252	0.538335	0.516014	0.690777	0.501963	0.507685	0.502929	0.453143	0.563062	0.631183	0.601042	0.558352	0.630367	0.525704	0.635527	0.50674	0.597073	0.624309	0.656064	0.577843	0.611984	0.540787	0.621165	0.702621	0.509903	0.529425	0.412539	0.582333	0.689303	0.557908	0.605317	0.616198	0.600302	0.65514	0.678572	0.534995	0.642756	0.51639	0.607508
Cell_0137	TFEB_TR	Glucose 17 mM + Glutamine 2.500000e-01 mM + EAA 1.000000e-01 X	1.16424	2.07294	2.06525	0.997915	1.61751	0.893632	1.11926	1.15617	0.738096	0.791657	2.16346	1.05388	1.58609	1.05656	0.718783	2.86736	0.938849	0.994255	1.30307	1.14794	2.72728	0.936952	0.934135	3.10978	3.62075	1.12209	1.45492	1.13928	1.02883	1.07126	1.60564	1.21977	1.19812	1.41686	1.47985	3.55083	1.0978	0.861334	2.43177	1.75379	2.58386	1.79392	0.827416	2.17466	1.40773	1.27406	1.00284
Cell_0137	FOXO_TR	Glucose 17 mM + Glutamine 2.500000e-01 mM + EAA 1.000000e-01 X	1.33336	1.64621	1.69138	1.47808	1.54703	1.14106	1.2055	1.0541	1.89243	1.12741	1.50048	1.44467	1.44743	1.11274	1.35953	1.36038	1.16616	1.39975	1.13374	1.88758	2.1208	1.12887	1.47438	1.61561	1.49924	2.65178	1.22273	1.66271	1.98962	0.889176	1.18895	1.74419	1.35547	2.20231	1.37691	1.57205	0.970711	1.04455	1.28565	1.20805	1.63867	1.40419	1.26537	1.28644	1.18696	1.45803	1.89824
Cell_0137	AMPKARt2	Glucose 17 mM + Glutamine 2.500000e-01 mM + EAA 1.000000e-01 X	0.591027	0.668314	0.550131	0.469158	0.608392	0.63342	0.497963	0.615485	0.614376	0.543525	0.514037	0.683088	0.515067	0.498395	0.53649	0.457264	0.552839	0.599389	0.608941	0.553162	0.620114	0.556467	0.587812	0.521143	0.591972	0.637846	0.648248	0.588503	0.613012	0.532931	0.634887	0.701539	0.508325	0.495503	0.407484	0.577671	0.696641	0.51113	0.623781	0.624	0.612895	0.643059	0.679202	0.53088	0.63223	0.518108	0.605788
Cell_0138	TFEB_TR	Glucose 17 mM + Glutamine 2.500000e-01 mM + EAA 1.000000e-01 X	0.96528	1.91547	1.97903	0.893316	1.65001	1.05139	1.09842	1.16191	0.669841	0.8617	2.10118	1.06927	1.73137	1.06737	0.717086	3.17429	0.894738	1.22803	1.35073	1.00575	2.84662	0.945526	0.748198	4.04259	3.2467	1.17259	1.27834	1.03901	0.987562	0.921221	1.63134	1.18653	1.21199	1.57763	1.80622	3.57078	0.926706	0.671177	2.45203	1.70288	2.08215	1.72936	0.824949	2.31683	1.45396	1.66304	0.994291
Cell_0138	FOXO_TR	Glucose 17 mM + Glutamine 2.500000e-01 mM + EAA 1.000000e-01 X	1.35712	1.6207	1.62618	1.40364	1.58343	1.31047	1.24949	1.05444	1.97618	0.928091	1.52792	1.41044	1.43661	1.10393	1.37707	1.33682	1.15496	1.3848	1.26996	1.76006	1.95963	1.10823	1.40899	1.58344	1.45358	2.64861	1.18689	1.69078	1.93339	0.86079	1.22993	1.74664	1.30299	2.0636	1.39338	1.51716	0.99526	0.83701	1.20461	1.20915	1.59988	1.47309	1.30427	1.29012	1.16405	1.48468	1.92766
Cell_0138	AMPKARt2	Glucose 17 mM + Glutamine 2.500000e-01 mM + EAA 1.000000e-01 X	0.580663	0.658118	0.545339	0.473501	0.628105	0.654978	0.496925	0.600583	0.610796	0.531916	0.507587	0.690815	0.508262	0.501774	0.608344	0.483667	0.541636	0.581345	0.624392	0.548845	0.619296	0.568592	0.604933	0.523476	0.592427	0.62938	0.653728	0.58844	0.610062	0.53	0.63747	0.698944	0.488817	0.490936	0.400188	0.566859	0.704925	0.502787	0.621284	0.6169	0.601942	0.628019	0.672093	0.523653	0.636943	0.53521	0.619015
Cell_0139	TFEB_TR	Glucose 17 mM + Glutamine 2.500000e-01 mM + EAA 1.000000e-01 X	0.91066	2.20802	2.12947	0.981192	1.83733	1.45016	1.182	1.21979	0.56711	0.887588	2.38022	1.09961	1.84244	1.07057	0.744705	2.80151	0.828949	1.2578	1.35484	1.00848	3.00094	0.938451	0.809873	3.36318	2.96627	1.21114	1.34778	1.06727	0.988166	0.981806	1.49758	1.01892	1.19554	1.67665	2.11138	3.39427	0.922548	0.701084	2.513	1.37917	1.63772	1.70391	0.790895	2.45413	1.50034	1.65164	0.934774
Cell_0139	FOXO_TR	Glucose 17 mM + Glutamine 2.500000e-01 mM + EAA 1.000000e-01 X	1.31921	1.66381	1.72392	1.42349	1.61688	1.92695	1.31293	1.11195	2.0751	1.36803	1.58282	1.43434	1.44299	1.10914	1.42305	1.27613	1.12116	1.36578	1.2367	1.65472	1.74396	1.04638	1.46112	1.66922	1.45085	2.56021	1.22355	1.77194	1.87517	0.87739	1.21563	1.659	1.29391	1.9753	1.41907	1.42427	1.42691	0.894769	1.20644	1.14138	1.51369	1.48932	1.29732	1.30951	1.11986	1.54873	1.89759
Cell_0139	AMPKARt2	Glucose 17 mM + Glutamine 2.500000e-01 mM + EAA 1.000000e-01 X	0.568482	0.6628	0.538384	0.456175	0.642308	0.599493	0.485109	0.599715	0.610455	0.564406	0.516598	0.694351	0.491207	0.514689	0.627018	0.476718	0.535956	0.570915	0.630826	0.55008	0.611339	0.555288	0.598997	0.553466	0.598833	0.620402	0.670353	0.584983	0.607019	0.538469	0.628354	0.713076	0.469041	0.491814	0.38458	0.572344	0.644221	0.520442	0.610918	0.607738	0.598723	0.636016	0.669249	0.524966	0.650783	0.559423	0.630442
Cell_0140	TFEB_TR	Glucose 17 mM + Glutamine 2.500000e-01 mM + EAA 1.000000e-01 X	1.06616	2.99315	2.15798	1.29696	2.04243	1.38893	1.19236	1.274	0.60996	0.892374	2.59284	1.11174	1.77528	1.05275	0.767238	2.37566	0.828682	1.11572	1.36869	1.15401	3.07496	0.932573	1.11866	2.3319	3.05724	1.09399	1.5003	1.19553	1.12147	1.16294	1.52425	0.927078	1.23531	1.56203	2.10671	3.5091	0.842667	0.79423	2.40382	1.24676	1.80196	1.76353	0.75205	2.5604	1.39973	1.31122	0.941784
Cell_0140	FOXO_TR	Glucose 17 mM + Glutamine 2.500000e-01 mM + EAA 1.000000e-01 X	1.27719	1.86647	1.76985	1.46779	1.60138	2.01029	1.31623	1.14154	2.11556	1.84873	1.57608	1.44713	1.41921	1.11293	1.44586	1.23716	1.08869	1.37043	1.10074	1.64641	1.61842	1.0268	1.46346	1.64215	1.4109	2.52085	1.31086	1.80195	1.97728	0.96612	1.20416	1.57396	1.3642	1.94123	1.43748	1.43897	1.3581	0.907888	1.25447	1.08676	1.45168	1.42394	1.25689	1.29918	1.09566	1.58906	1.81897
Cell_0140	AMPKARt2	Glucose 17 mM + Glutamine 2.500000e-01 mM + EAA 1.000000e-01 X	0.571241	0.65908	0.530042	0.444485	0.633433	0.587715	0.478132	0.592966	0.604682	0.597685	0.528766	0.688922	0.501806	0.522173	0.605427	0.447348	0.541824	0.553858	0.632351	0.553901	0.60895	0.54396	0.600864	0.612986	0.59815	0.625665	0.670279	0.582591	0.60423	0.547102	0.632971	0.722551	0.470255	0.4809	0.378546	0.576537	0.595976	0.51183	0.624406	0.617546	0.630624	0.647396	0.674641	0.539255	0.649485	0.548328	0.628236
Cell_0141	TFEB_TR	Glucose 17 mM + Glutamine 2.500000e-01 mM + EAA 1.000000e-01 X	1.17013	3.08809	2.00708	1.36119	2.12026	1.57762	1.22232	1.24099	0.661782	1.01449	2.70107	1.21622	1.63849	1.04277	0.767396	3.13969	0.972226	1.17412	1.4364	0.751395	3.09704	0.915932	1.29908	2.57773	2.94031	0.962177	1.32778	1.06674	1.21605	1.14885	1.65294	1.01567	1.33329	1.4811	2.15057	3.37581	0.802517	0.931667	2.14641	1.41063	1.98836	1.7202	0.732078	2.43203	1.22526	1.69342	0.978371
Cell_0141	FOXO_TR	Glucose 17 mM + Glutamine 2.500000e-01 mM + EAA 1.000000e-01 X	1.22163	1.99356	1.70035	1.53914	1.55181	1.96578	1.41305	1.13005	2.05632	1.43555	1.56298	1.42359	1.37941	1.11194	1.43199	1.26554	1.10503	1.32044	1.11337	1.07587	1.61131	1.02587	1.45259	1.49924	1.35573	2.52763	1.35598	1.78369	2.21495	0.981801	1.24958	1.52341	1.40533	1.85649	1.42926	1.54091	1.32387	0.856064	1.24898	1.0914	1.41465	1.36896	1.23133	1.25854	1.09617	1.56407	1.78711
Cell_0141	AMPKARt2	Glucose 17 mM + Glutamine 2.500000e-01 mM + EAA 1.000000e-01 X	0.578295	0.645337	0.524312	0.441956	0.624035	0.597633	0.500269	0.595198	0.60514	0.557765	0.517532	0.685943	0.522513	0.519412	0.603362	0.472619	0.556871	0.547427	0.635813	0.358901	0.621278	0.546238	0.623636	0.642621	0.59517	0.622131	0.652181	0.586459	0.593006	0.539061	0.643824	0.708708	0.48693	0.499188	0.381393	0.567787	0.610171	0.49629	0.638928	0.61863	0.660291	0.643749	0.684179	0.553167	0.636854	0.514244	0.624521
Cell_0142	TFEB_TR	Glucose 17 mM + Glutamine 2.500000e-01 mM + EAA 1.000000e-01 X	1.03722	2.34357	2.20239	1.31487	2.09969	1.80078	1.30279	1.21425	0.576762	1.08942	2.55599	1.4516	1.63319	1.04765	0.76262	4.00647	0.957969	1.31866	1.6429	0.772672	3.29151	0.898035	1.13771	3.68875	2.6676	0.996548	1.18415	1.00257	1.177	0.938659	1.64728	1.06312	1.40857	1.53504	2.41832	2.77022	0.798381	1.02285	2.11544	1.70532	1.79205	1.63238	0.730576	2.2009	1.3077	2.29658	0.969708
Cell_0142	FOXO_TR	Glucose 17 mM + Glutamine 2.500000e-01 mM + EAA 1.000000e-01 X	1.15244	1.90578	1.81302	1.581	1.51044	1.97148	1.49749	1.12093	1.95919	0.982007	1.62898	1.46207	1.39822	1.11328	1.41407	1.37483	1.09918	1.26682	1.23855	1.10274	1.61829	1.01455	1.54662	1.43302	1.34604	2.4143	1.33337	1.77186	2.35245	0.896794	1.27808	1.48576	1.38485	1.85552	1.42016	1.58153	1.3319	0.883	1.22558	1.1239	1.36605	1.40166	1.23052	1.23275	1.15472	1.58411	1.85086
Cell_0142	AMPKARt2	Glucose 17 mM + Glutamine 2.500000e-01 mM + EAA 1.000000e-01 X	0.571964	0.656002	0.525372	0.432858	0.632216	0.612979	0.518998	0.613896	0.618586	0.531646	0.500755	0.669418	0.522725	0.511136	0.608004	0.521242	0.570981	0.558498	0.621835	0.366098	0.624079	0.559626	0.628297	0.632152	0.592683	0.607497	0.655561	0.590842	0.571375	0.518312	0.639266	0.698155	0.50536	0.527654	0.374892	0.570531	0.638709	0.500449	0.636223	0.610215	0.660502	0.642092	0.680868	0.558593	0.63253	0.507406	0.637763
Cell_0143	TFEB_TR	Glucose 17 mM + Glutamine 2.500000e-01 mM + EAA 1.000000e-01 X	1.02428	2.16223	0.689465	1.3403	2.04996	1.62103	1.27976	1.19833	0.520138	1.0608	2.19632	1.52668	1.72103	1.04993	0.766575	3.83251	0.784426	1.2105	1.76433	0.76859	3.48679	0.891235	0.980571	4.07221	2.78606	1.12338	1.29646	1.18622	1.15339	0.86692	1.59975	1.03612	1.36147	1.26969	2.40768	2.6091	0.836868	0.995324	2.25932	1.9089	1.54315	1.71285	0.768473	2.09422	1.57214	2.26079	0.979265
Cell_0143	FOXO_TR	Glucose 17 mM + Glutamine 2.500000e-01 mM + EAA 1.000000e-01 X	1.10725	1.81845	1.9432	1.56148	1.52453	2.08598	1.39863	1.11781	1.90525	1.14147	1.70752	1.49532	1.42049	1.12188	1.38118	1.46698	1.04229	1.23704	1.2757	1.08237	1.57342	1.01207	1.55795	1.44635	1.33045	2.30017	1.30062	1.73256	2.33848	0.938391	1.22166	1.44624	1.38971	1.44927	1.41871	1.5331	1.35083	0.944535	1.23679	1.12506	1.33564	1.44999	1.21541	1.21447	1.24485	1.63599	1.91453
Cell_0143	AMPKARt2	Glucose 17 mM + Glutamine 2.500000e-01 mM + EAA 1.000000e-01 X	0.56567	0.68239	0.537734	0.435582	0.638049	0.615437	0.503772	0.621679	0.62879	0.55999	0.49263	0.638656	0.527041	0.504506	0.598224	0.502946	0.574743	0.567312	0.610032	0.361495	0.620244	0.56845	0.60679	0.622817	0.584183	0.605746	0.678174	0.588196	0.551434	0.508554	0.635264	0.699714	0.528315	0.608446	0.378698	0.582874	0.629687	0.509888	0.636898	0.61933	0.654254	0.641575	0.660525	0.563169	0.63399	0.519401	0.65675
Cell_0144	TFEB_TR	Glucose 17 mM + Glutamine 2.500000e-01 mM + EAA 1.000000e-01 X	1.38784	2.85754	0.689135	1.08578	1.99268	1.27813	1.24933	1.07072	0.557594	1.08205	2.18681	1.34684	1.71131	1.05725	0.799794	3.38187	0.86552	1.05424	1.61699	0.768256	3.3844	0.876499	1.07203	3.28253	3.15067	1.16976	1.47715	1.23665	1.26073	1.00729	1.58403	1.12323	1.24503	1.30231	2.12619	2.94558	0.924169	0.928077	2.27397	1.73132	1.39961	1.83262	0.811799	2.01116	1.59217	2.05356	1.03514
Cell_0144	FOXO_TR	Glucose 17 mM + Glutamine 2.500000e-01 mM + EAA 1.000000e-01 X	1.10926	1.84613	1.84773	1.48159	1.58424	2.14823	1.34612	1.08887	1.82759	1.22003	1.71252	1.43555	1.38491	1.13647	1.31768	1.462	1.0813	1.20598	1.21668	1.04844	1.52949	1.00161	1.46594	1.47072	1.31592	2.3292	1.28725	1.6685	2.33396	1.20379	1.15222	1.41852	1.39466	1.40349	1.40538	1.50119	1.32097	0.935717	1.22432	1.06388	1.33104	1.47161	1.22336	1.20677	1.27176	1.58802	1.90736
Cell_0144	AMPKARt2	Glucose 17 mM + Glutamine 2.500000e-01 mM + EAA 1.000000e-01 X	0.562339	0.682262	0.536334	0.449211	0.629859	0.624851	0.495554	0.617268	0.624508	0.551387	0.482968	0.631211	0.548124	0.504922	0.592262	0.473974	0.570287	0.566601	0.616766	0.363885	0.629277	0.574706	0.603995	0.632422	0.582913	0.613861	0.680439	0.588263	0.549785	0.518802	0.634597	0.697349	0.534407	0.613721	0.395016	0.586878	0.622784	0.51852	0.643528	0.632754	0.657586	0.63246	0.652505	0.567769	0.63114	0.516699	0.647973
Cell_0145	TFEB_TR	Glucose 17 mM + Glutamine 2.500000e-01 mM + EAA 1.000000e-01 X	1.59051	3.10082	0.681842	0.775099	2.01468	1.38671	1.31402	0.984673	0.580841	1.15309	2.48111	1.2374	1.76982	1.06318	0.8606	3.22652	1.55206	1.10034	1.6273	0.789113	3.17928	0.872139	1.15411	2.42741	3.29775	1.11113	1.62016	1.13291	1.39213	1.06963	1.50009	1.23919	1.26428	1.26902	2.09019	2.91107	0.93241	0.921	2.29582	1.47113	1.24321	1.75689	0.791346	2.03294	1.37742	1.85974	1.08043
Cell_0145	FOXO_TR	Glucose 17 mM + Glutamine 2.500000e-01 mM + EAA 1.000000e-01 X	1.12579	1.85411	1.83415	1.33071	1.63267	2.12872	1.423	1.04399	1.68393	1.11206	1.65584	1.39879	1.42595	1.15007	1.27339	1.43268	2.81402	1.23492	1.19787	1.05057	1.50582	0.992992	1.4603	1.4908	1.36533	2.3534	1.24707	1.6471	2.3404	1.41605	1.16853	1.42306	1.36333	1.36214	1.38282	1.50761	1.26975	0.919755	1.17851	1.00114	1.30408	1.52525	1.25873	1.22687	1.26671	1.48306	1.92418
Cell_0145	AMPKARt2	Glucose 17 mM + Glutamine 2.500000e-01 mM + EAA 1.000000e-01 X	0.55775	0.666872	0.538247	0.44895	0.620296	0.637192	0.515373	0.615596	0.618463	0.529057	0.480978	0.639426	0.542366	0.513101	0.584776	0.501686	0.705764	0.569927	0.603041	0.383325	0.6354	0.583643	0.625153	0.646087	0.599288	0.601093	0.674958	0.592327	0.563173	0.513869	0.630044	0.701398	0.531055	0.622042	0.386587	0.586936	0.638349	0.528368	0.639936	0.639701	0.663057	0.630943	0.661202	0.572134	0.629539	0.505581	0.627985
Cell_0146	TFEB_TR	Glucose 17 mM + Glutamine 2.500000e-01 mM + EAA 1.000000e-01 X	1.33676	2.64152	0.695377	0.87753	2.19755	1.71718	1.23548	1.06477	0.597323	1.15532	2.4022	1.36545	2.07616	1.04933	0.903274	3.29141	1.77895	1.21653	1.77036	0.806843	3.17901	0.880006	1.09643	1.82143	3.08511	1.1485	1.53153	1.11414	1.34942	1.06629	1.4922	1.18866	1.45161	1.19738	2.18999	2.70572	0.849482	1.07189	2.42738	1.55495	1.13121	1.61672	0.754613	2.26018	1.34805	1.45414	1.10291
Cell_0146	FOXO_TR	Glucose 17 mM + Glutamine 2.500000e-01 mM + EAA 1.000000e-01 X	1.11091	1.80611	1.91274	1.23526	1.65603	2.11266	1.41609	1.02703	1.59914	1.17998	1.57836	1.42589	1.56376	1.15192	1.2846	1.43714	2.78735	1.28756	1.21788	1.06606	1.45159	1.00079	1.4213	1.44104	1.41242	2.3115	1.18698	1.65298	2.2855	1.34446	1.26206	1.43613	1.39647	1.34308	1.37113	1.50673	1.26587	0.99728	1.17965	1.0104	1.26304	1.58689	1.22819	1.2296	1.29758	1.40815	1.95792
Cell_0146	AMPKARt2	Glucose 17 mM + Glutamine 2.500000e-01 mM + EAA 1.000000e-01 X	0.55539	0.666947	0.542869	0.453806	0.608944	0.623692	0.524249	0.605434	0.617615	0.552294	0.481642	0.612268	0.506797	0.523987	0.566054	0.505748	0.703254	0.575598	0.587045	0.399783	0.629969	0.576218	0.626103	0.649495	0.615022	0.565584	0.689776	0.59173	0.563594	0.484463	0.650908	0.716055	0.563457	0.628672	0.377372	0.588482	0.637482	0.535645	0.63488	0.654696	0.667446	0.64114	0.662957	0.582751	0.636143	0.5058	0.638233
Cell_0147	TFEB_TR	Glucose 17 mM + Glutamine 2.500000e-01 mM + EAA 1.000000e-01 X	1.15283	2.51391	0.7324	1.12465	2.30059	1.62131	1.051	1.08765	0.582865	1.04902	2.09081	1.63383	2.24332	1.03703	0.9427	3.36652	1.74895	1.32045	1.64634	0.811324	3.31416	0.855001	1.07282	1.41253	2.75279	1.32007	1.28757	1.171	1.16708	1.16398	0.446309	1.12898	1.53521	1.2692	2.18441	2.88221	0.914378	1.20745	2.45256	1.52863	1.12564	1.63329	0.743451	2.31073	1.4816	1.32956	1.10713
Cell_0147	FOXO_TR	Glucose 17 mM + Glutamine 2.500000e-01 mM + EAA 1.000000e-01 X	1.07425	1.76366	2.03495	1.24548	1.69245	2.10966	1.35474	1.03325	1.59848	1.22087	1.52136	1.41485	1.60592	1.14817	1.33492	1.44207	2.782	1.24875	1.19428	1.06476	1.367	0.991547	1.31135	1.35554	1.38631	2.26787	1.21112	1.65148	2.27504	1.1688	1.27216	1.41262	1.44449	1.35806	1.37776	1.52206	1.26235	1.05896	1.204	1.0469	1.23364	1.58758	1.16428	1.20377	1.341	1.33111	1.89539
Cell_0147	AMPKARt2	Glucose 17 mM + Glutamine 2.500000e-01 mM + EAA 1.000000e-01 X	0.543028	0.664812	0.548857	0.474095	0.601467	0.61707	0.51983	0.586393	0.606784	0.558511	0.46852	0.56107	0.505576	0.531146	0.561086	0.472917	0.705977	0.572356	0.616605	0.396994	0.627692	0.562968	0.612881	0.652101	0.615748	0.539566	0.704403	0.590449	0.545168	0.473883	0.593685	0.71676	0.577423	0.627882	0.412589	0.589877	0.626906	0.540389	0.641581	0.664963	0.673736	0.643246	0.665682	0.591295	0.647896	0.515892	0.657521
Cell_0148	TFEB_TR	Glucose 17 mM + Glutamine 2.500000e-01 mM + EAA 1.000000e-01 X	1.3559	2.54345	0.746454	1.21132	2.15679	1.29893	1.0231	1.00655	0.5142	0.971845	2.30158	1.88414	2.1244	1.04732	1.02455	3.28143	1.71405	1.34347	1.67686	0.81854	3.37032	0.83004	1.08584	1.54467	2.66122	1.32772	1.28779	1.17123	1.11441	1.16964	0.480544	1.2174	1.38045	1.47755	2.23833	2.99343	1.07128	1.05447	2.36778	1.21456	1.20373	1.74015	0.697852	2.05658	1.4932	1.47465	1.03272
Cell_0148	FOXO_TR	Glucose 17 mM + Glutamine 2.500000e-01 mM + EAA 1.000000e-01 X	1.04454	1.72153	2.10651	1.18833	1.78378	2.05812	1.35531	1.02444	1.57059	1.14337	1.51993	1.37588	1.56759	1.1792	1.3882	1.45905	2.84458	1.16875	1.1557	1.07004	1.28174	0.986857	1.40345	1.37993	1.34879	2.16536	1.32669	1.65799	2.37456	1.12391	1.32434	1.35901	1.39151	1.36416	1.39472	1.59909	1.26056	0.975286	1.16176	1.04477	1.19923	1.55883	1.16138	1.1897	1.40556	1.26346	1.83917
Cell_0148	AMPKARt2	Glucose 17 mM + Glutamine 2.500000e-01 mM + EAA 1.000000e-01 X	0.528717	0.653618	0.550669	0.474422	0.606254	0.635159	0.530533	0.577755	0.583158	0.542761	0.468484	0.542414	0.549301	0.537516	0.575262	0.487341	0.715989	0.566324	0.637313	0.388763	0.628972	0.569316	0.622697	0.666185	0.610362	0.538782	0.705733	0.591846	0.539307	0.480731	0.583104	0.702998	0.528481	0.620739	0.452647	0.590048	0.630696	0.540819	0.645841	0.652003	0.680104	0.634555	0.671618	0.589018	0.659989	0.514622	0.655168
Cell_0149	TFEB_TR	Glucose 17 mM + Glutamine 2.500000e-01 mM + EAA 1.000000e-01 X	1.6202	2.17914	0.740576	1.15973	2.14041	1.33844	1.03273	1.01458	0.541444	1.08058	2.74826	1.97257	2.11969	2.06214	1.09225	3.44926	1.88518	1.15159	1.96252	0.831275	3.23222	0.844778	1.0529	1.43336	2.77487	1.18315	1.42842	1.0448	1.27457	1.07712	0.490401	1.27032	1.24782	1.52127	2.27368	2.64065	1.03929	0.865539	2.29056	1.29742	1.31544	1.81272	0.676473	1.94318	1.50341	1.3215	0.884941
Cell_0149	FOXO_TR	Glucose 17 mM + Glutamine 2.500000e-01 mM + EAA 1.000000e-01 X	1.05255	1.7086	2.08954	1.07965	1.89917	1.96854	1.37768	0.997567	1.52873	1.13057	1.54723	1.37087	1.57515	1.63896	1.39308	1.52597	2.9244	1.13775	1.13391	1.08677	1.23687	1.01451	1.58223	1.44041	1.34167	2.02458	1.41421	1.66116	2.46612	1.12626	1.33471	1.33437	1.37659	1.33868	1.41092	1.69526	1.33063	0.890409	1.10735	1.02859	1.19	1.5686	1.17258	1.17438	2.08303	1.24616	1.86002
Cell_0149	AMPKARt2	Glucose 17 mM + Glutamine 2.500000e-01 mM + EAA 1.000000e-01 X	0.539528	0.661821	0.544088	0.464352	0.601308	0.623149	0.545599	0.576105	0.56529	0.565857	0.487304	0.552251	0.57585	0.61222	0.582604	0.507666	0.71701	0.565931	0.609062	0.396549	0.639636	0.578108	0.629817	0.681589	0.609278	0.548926	0.705984	0.598464	0.551705	0.48107	0.583031	0.701262	0.516843	0.612639	0.454259	0.588117	0.631237	0.534314	0.642478	0.632191	0.678195	0.628624	0.658756	0.583708	0.661321	0.496201	0.643186
Cell_0150	TFEB_TR	Glucose 17 mM + Glutamine 2.500000e-01 mM + EAA 1.000000e-01 X	1.50016	2.14227	0.758228	1.17345	2.39656	1.58359	1.04297	1.04337	0.631883	1.19521	2.51125	1.95757	2.20538	1.77004	1.10573	3.67144	1.93079	1.01408	1.87539	0.833627	2.94065	0.844552	1.02828	1.26065	2.96487	1.27068	1.39529	0.984104	1.49758	1.12359	0.475469	1.26654	1.2728	1.43023	2.15841	2.48416	0.932299	0.935399	2.30459	1.63746	1.39272	1.84994	0.764009	2.07939	1.50505	1.29979	0.83566
Cell_0150	FOXO_TR	Glucose 17 mM + Glutamine 2.500000e-01 mM + EAA 1.000000e-01 X	1.09932	1.7478	2.04944	1.10116	1.95439	1.96951	1.40364	0.970128	1.52289	1.1917	1.55172	1.35817	1.55206	1.63618	1.36022	1.58205	2.92691	1.13786	1.11347	1.08828	1.26179	1.02199	1.54526	1.37386	1.33489	1.96345	1.4402	1.67943	2.459	1.04511	1.29797	1.375	1.42926	1.35561	1.42381	1.71629	1.36555	0.952104	1.13526	1.02333	1.25781	1.60743	1.15283	1.15739	2.05519	1.23743	1.8116
Cell_0150	AMPKARt2	Glucose 17 mM + Glutamine 2.500000e-01 mM + EAA 1.000000e-01 X	0.555662	0.674714	0.539903	0.481813	0.58834	0.58867	0.550962	0.571922	0.567617	0.585679	0.485933	0.551466	0.563764	0.609164	0.577486	0.481312	0.708196	0.571489	0.598248	0.404548	0.671783	0.576783	0.609322	0.686397	0.612128	0.549557	0.701097	0.619304	0.553153	0.495048	0.585097	0.709926	0.552185	0.603896	0.444217	0.584132	0.623405	0.524887	0.647204	0.620634	0.670937	0.625476	0.642701	0.576158	0.667655	0.485386	0.634417
Cell_0151	TFEB_TR	Glucose 17 mM + Glutamine 2.500000e-01 mM + EAA 1.000000e-01 X	1.05632	2.51699	0.77497	1.54124	2.50932	1.57848	1.15786	0.968128	0.63279	1.07821	2.08111	1.9496	2.15926	1.43895	1.11609	3.24087	1.68961	1.22781	1.53684	0.829348	2.86796	0.828735	1.02509	2.66564	3.32535	1.5266	1.25549	0.582293	1.66587	1.16416	0.478076	1.39358	1.2883	1.53208	2.07918	2.96922	0.950792	1.01261	2.52349	1.61217	1.65357	1.85575	0.8483	2.14203	1.53988	1.62518	0.931579
Cell_0151	FOXO_TR	Glucose 17 mM + Glutamine 2.500000e-01 mM + EAA 1.000000e-01 X	1.0941	1.75162	2.03331	1.17051	1.95856	2.0646	1.41151	0.962097	1.48778	1.28191	1.53656	1.29915	1.47496	1.63634	1.36475	1.54097	2.86375	1.16239	1.10832	1.08174	1.28307	1.0169	1.47835	1.29946	1.33119	1.93165	1.46147	1.44091	2.39402	0.99439	1.25566	1.42877	1.37315	1.40844	1.43522	1.69194	1.32184	1.01805	1.1849	1.01787	1.36647	1.60059	1.13864	1.18438	2.17014	1.22753	1.74308
Cell_0151	AMPKARt2	Glucose 17 mM + Glutamine 2.500000e-01 mM + EAA 1.000000e-01 X	0.555857	0.660884	0.542407	0.498241	0.592096	0.58335	0.548919	0.574111	0.585766	0.557881	0.478105	0.551183	0.552893	0.591482	0.575854	0.476491	0.714679	0.576219	0.616174	0.39389	0.701889	0.579053	0.605572	0.682289	0.613648	0.537381	0.69277	0.601138	0.542399	0.522148	0.58206	0.70402	0.529536	0.595016	0.448605	0.574868	0.602228	0.522662	0.651309	0.611666	0.672489	0.623856	0.646992	0.568505	0.670925	0.491484	0.643875
Cell_0152	TFEB_TR	Glucose 17 mM + Glutamine 2.500000e-01 mM + EAA 1.000000e-01 X	0.924597	2.46107	0.76104	1.87716	2.39773	1.48395	1.17083	0.917215	0.664806	0.899679	2.33552	1.94353	2.16708	1.52624	1.1138	2.78089	1.49511	1.40482	1.41573	0.836301	3.21896	0.845721	1.08643	4.50803	3.63768	1.54234	1.16641	0.617476	1.6781	1.11664	0.501192	1.49629	1.32724	1.68178	2.05288	3.12215	0.984347	0.929203	2.72193	1.61345	2.15866	1.87085	0.871358	2.14761	1.51533	1.59005	1.00823
Cell_0152	FOXO_TR	Glucose 17 mM + Glutamine 2.500000e-01 mM + EAA 1.000000e-01 X	1.02033	1.71676	2.0292	1.12878	1.96516	2.11343	1.39305	0.984113	1.39734	1.34016	1.50504	1.23889	1.44411	1.57658	1.39931	1.49302	2.83752	1.2534	1.09712	1.09752	1.26938	1.05268	1.55027	1.35883	1.32916	1.84397	1.48121	1.43723	2.36031	1.09672	1.24198	1.42639	1.28795	1.36723	1.44989	1.72702	1.37352	0.968007	1.19279	1.0101	1.43837	1.56929	1.13967	1.23793	2.17216	1.24179	1.76724
Cell_0152	AMPKARt2	Glucose 17 mM + Glutamine 2.500000e-01 mM + EAA 1.000000e-01 X	0.564014	0.648897	0.54079	0.483657	0.597977	0.580868	0.534903	0.583803	0.595014	0.533643	0.488281	0.568942	0.564349	0.594067	0.58424	0.491265	0.718889	0.568641	0.604721	0.399408	0.704263	0.578645	0.633264	0.680499	0.610668	0.530881	0.692763	0.610378	0.541826	0.532156	0.575867	0.69213	0.488935	0.598267	0.465308	0.565699	0.553992	0.535538	0.642706	0.609246	0.673707	0.634981	0.654496	0.573166	0.672482	0.501271	0.666546
Cell_0153	TFEB_TR	Glucose 17 mM + Glutamine 2.500000e-01 mM + EAA 1.000000e-01 X	1.30906	2.20806	0.752092	1.67473	2.39783	1.55586	1.12663	0.919889	0.738085	0.886459	0.75148	1.9479	2.23892	1.84768	1.07758	2.90837	1.46905	1.28434	1.48872	0.836815	3.40531	0.853705	1.24122	4.57062	3.66608	1.36153	1.21695	0.63401	1.53714	1.15122	0.502568	1.38981	1.46148	1.58572	1.97493	2.52208	0.982215	0.869894	2.60333	1.83568	2.28881	0.608874	0.891472	2.29174	1.46644	1.42403	1.04402
Cell_0153	FOXO_TR	Glucose 17 mM + Glutamine 2.500000e-01 mM + EAA 1.000000e-01 X	0.994721	1.73304	1.99808	1.05984	1.95162	2.14595	1.42652	0.989104	1.30672	1.29683	1.94349	1.20682	1.45132	1.52862	1.40618	1.55375	2.86484	1.39627	1.05455	1.142	1.27523	1.07577	1.55692	1.45127	1.29615	1.77279	1.47608	1.44418	2.37895	1.23291	1.23166	1.40211	1.30197	1.26804	1.47618	1.77742	1.48133	0.911736	1.20627	0.99379	1.45319	1.78079	1.15307	1.26239	2.13662	1.23335	1.72702
Cell_0153	AMPKARt2	Glucose 17 mM + Glutamine 2.500000e-01 mM + EAA 1.000000e-01 X	0.573896	0.659245	0.54455	0.467707	0.599215	0.554338	0.526834	0.59078	0.583632	0.540495	0.634297	0.578401	0.57739	0.611812	0.591141	0.471101	0.696023	0.557855	0.589782	0.427064	0.696805	0.562136	0.645719	0.690938	0.609806	0.542246	0.694871	0.617162	0.551581	0.51433	0.587285	0.702314	0.50695	0.615827	0.485022	0.570052	0.527349	0.554782	0.642285	0.622857	0.664288	0.595487	0.654711	0.578552	0.671963	0.506864	0.663257
Cell_0154	TFEB_TR	Glucose 17 mM + Glutamine 2.500000e-01 mM + EAA 1.000000e-01 X	1.65466	2.25329	0.765897	1.34682	2.51017	1.52499	1.23338	0.858516	0.703846	0.967928	0.810978	1.95653	2.18602	1.92793	1.06606	3.09937	1.46364	1.30212	1.55788	0.808841	3.20374	0.831754	1.21736	3.61125	3.49251	1.32837	1.3626	0.636962	1.43686	1.13186	0.495079	1.30741	1.46637	1.44988	1.88997	2.39433	1.04447	0.891785	2.34569	1.69541	1.96414	0.589428	0.873922	2.35245	1.48896	1.47149	1.07458
Cell_0154	FOXO_TR	Glucose 17 mM + Glutamine 2.500000e-01 mM + EAA 1.000000e-01 X	1.0102	1.76048	1.97047	1.04909	1.92044	2.23325	1.52768	0.942577	1.2402	1.21553	1.90456	1.1799	1.4618	1.57026	1.40545	1.5413	2.81919	1.47424	1.03054	1.17673	1.26415	1.05214	1.43232	1.49579	1.26993	1.78044	1.4433	1.42108	2.3799	1.22877	1.20139	1.41074	1.30483	1.27182	1.4935	1.79948	1.46674	0.912513	1.21561	0.974053	1.4505	1.68262	1.17068	1.25309	2.24179	1.18391	1.60998
Cell_0154	AMPKARt2	Glucose 17 mM + Glutamine 2.500000e-01 mM + EAA 1.000000e-01 X	0.561135	0.657146	0.557441	0.462181	0.608637	0.527061	0.540809	0.591728	0.57261	0.549414	0.636181	0.57787	0.577005	0.606055	0.588581	0.468952	0.697237	0.559534	0.610373	0.411663	0.699368	0.549525	0.628523	0.698949	0.621122	0.559351	0.696666	0.616205	0.55688	0.484366	0.611787	0.717275	0.528838	0.625127	0.490656	0.578913	0.559717	0.563691	0.655413	0.637157	0.665417	0.615576	0.658906	0.563979	0.671155	0.497066	0.647823
Cell_0155	TFEB_TR	Glucose 17 mM + Glutamine 2.500000e-01 mM + EAA 1.000000e-01 X	1.6482	2.25791	0.788197	1.29477	2.44425	1.34696	1.20556	0.803382	0.72913	0.995704	0.739399	2.00339	2.10868	1.74842	1.07388	3.27535	1.45744	1.48448	1.4824	0.787402	3.32243	0.829654	1.00402	2.84958	0.911592	1.49404	1.52646	0.645256	1.42676	1.03506	0.499186	1.37892	1.31318	1.43646	1.80226	2.92733	1.11292	0.936252	2.23278	1.33658	1.93208	0.57635	0.863121	2.14119	1.49604	1.22169	1.00311
Cell_0155	FOXO_TR	Glucose 17 mM + Glutamine 2.500000e-01 mM + EAA 1.000000e-01 X	0.988743	1.7551	2.08291	1.02666	1.90136	2.27369	1.65804	0.915556	1.19387	1.19855	1.84348	1.16191	1.45968	1.58864	1.4246	1.43895	2.72311	1.45751	1.04554	1.15691	1.26734	1.04568	1.27788	1.50771	1.38958	1.81507	1.37982	1.39973	2.31477	1.13324	1.18607	1.42021	1.28094	1.33905	1.46932	1.8758	1.40594	0.918742	1.19412	0.969218	1.4583	1.66506	1.16679	1.22967	2.24238	1.14751	1.60039
Cell_0155	AMPKARt2	Glucose 17 mM + Glutamine 2.500000e-01 mM + EAA 1.000000e-01 X	0.555743	0.639451	0.545353	0.466199	0.611946	0.497962	0.550641	0.58937	0.573045	0.552822	0.633209	0.595141	0.567133	0.597177	0.591205	0.504902	0.726836	0.559476	0.620555	0.352798	0.703359	0.565617	0.604876	0.692602	0.623415	0.564413	0.699468	0.612686	0.556663	0.483981	0.598052	0.709371	0.52183	0.617549	0.489408	0.574668	0.584165	0.564185	0.661101	0.632974	0.675284	0.618268	0.664396	0.545839	0.673861	0.481615	0.661687
Cell_0156	TFEB_TR	Glucose 17 mM + Glutamine 2.500000e-01 mM + EAA 1.000000e-01 X	1.42724	2.04559	0.809487	1.44095	2.31444	1.41275	1.00637	0.834626	0.874222	0.9709	0.686759	2.03374	2.08372	1.34057	1.03645	3.72867	1.49874	1.47686	1.41686	0.82742	3.70237	0.819632	1.07474	2.20596	0.932609	1.63246	1.71384	0.644938	1.39387	1.12776	0.482233	1.39256	1.22766	1.39729	1.77258	3.16171	1.07881	1.00157	2.33426	1.32571	2.03795	0.571524	0.945824	1.96789	1.45809	1.37079	0.903669
Cell_0156	FOXO_TR	Glucose 17 mM + Glutamine 2.500000e-01 mM + EAA 1.000000e-01 X	0.997492	1.78809	2.26408	1.00012	1.87484	2.28073	1.75713	0.958803	1.15996	1.2576	1.73407	1.15664	1.44355	1.53378	1.42089	1.74987	2.74888	1.54571	1.05121	1.11742	1.37433	1.04051	1.15512	1.48862	1.32341	1.81021	1.31784	1.41159	2.22556	1.12077	1.195	1.42319	1.33022	1.34192	1.44604	1.94834	1.39122	0.927718	1.23308	0.967396	1.45028	1.70915	1.16684	1.19799	2.11973	1.1408	1.6237
Cell_0156	AMPKARt2	Glucose 17 mM + Glutamine 2.500000e-01 mM + EAA 1.000000e-01 X	0.572687	0.636537	0.511041	0.492892	0.612629	0.456532	0.553147	0.59291	0.57366	0.560518	0.630319	0.612237	0.54786	0.609176	0.6016	0.512039	0.696756	0.546148	0.612394	0.326398	0.704646	0.585236	0.590878	0.694026	0.648546	0.559226	0.695172	0.62193	0.559744	0.506658	0.573825	0.70318	0.518237	0.613405	0.50152	0.56281	0.558353	0.572303	0.660105	0.622746	0.671059	0.622685	0.661014	0.548152	0.677097	0.492307	0.678676
Cell_0157	TFEB_TR	Glucose 17 mM + Glutamine 2.500000e-01 mM + EAA 1.000000e-01 X	1.20974	1.86757	0.833265	1.64516	2.48044	1.58278	1.0299	0.545754	0.871797	0.992107	0.730656	1.86043	2.01396	1.12313	0.974821	4.05316	1.55806	1.47384	1.4799	0.941235	3.73954	0.778795	1.29647	2.10012	0.95206	1.59928	1.61174	0.614212	1.34622	1.28034	0.457539	1.32062	1.22457	1.42081	1.85947	3.11573	1.05086	1.04334	1.30407	1.5042	1.67524	0.578597	0.984622	2.03311	1.50263	2.37088	0.94271
Cell_0157	FOXO_TR	Glucose 17 mM + Glutamine 2.500000e-01 mM + EAA 1.000000e-01 X	1.06009	1.83311	2.26835	1.03065	1.87696	2.33113	1.70146	1.4485	1.13231	1.30517	1.61592	1.11998	1.47247	1.49941	1.37086	2.41581	2.8005	1.77415	1.02847	1.12961	1.42284	1.00647	1.17232	1.47292	1.3153	1.755	1.29941	1.36363	2.18038	1.18066	1.20154	1.46966	1.40027	1.30324	1.48976	1.92285	1.36086	0.947518	1.29957	0.951489	1.4016	1.73372	1.19687	1.16025	2.10312	1.15489	1.57343
Cell_0157	AMPKARt2	Glucose 17 mM + Glutamine 2.500000e-01 mM + EAA 1.000000e-01 X	0.579257	0.640538	0.500208	0.499818	0.622197	0.427261	0.565383	0.603219	0.570726	0.565606	0.629085	0.611594	0.533277	0.610592	0.596864	0.493651	0.628042	0.536327	0.621384	0.341557	0.707782	0.579189	0.594915	0.702464	0.638491	0.562204	0.691282	0.639017	0.559585	0.495488	0.597606	0.712193	0.516069	0.618333	0.505344	0.555513	0.54052	0.583763	0.436889	0.625441	0.671371	0.628744	0.653466	0.558512	0.677514	0.511996	0.673036
Cell_0158	TFEB_TR	Glucose 17 mM + Glutamine 2.500000e-01 mM + EAA 1.000000e-01 X	1.21959	1.9749	0.918422	1.78202	2.69662	1.50394	1.15351	0.524214	0.760879	1.03153	0.746312	1.79303	1.88702	1.39917	0.94638	3.65983	1.51372	1.45563	1.4981	1.09177	3.69608	0.798577	1.23137	2.67977	0.916159	1.54957	1.15072	0.585855	1.29854	1.24638	0.469129	1.37094	1.28377	1.56995	1.93214	2.87894	1.11854	1.04226	1.63566	1.5202	1.39691	0.581946	0.931429	2.12161	1.57666	2.47908	1.03291
Cell_0158	FOXO_TR	Glucose 17 mM + Glutamine 2.500000e-01 mM + EAA 1.000000e-01 X	1.06076	1.79903	2.19192	1.04726	1.94899	2.26485	1.54114	1.34682	1.10403	1.27874	1.58493	1.07996	1.47803	1.49718	1.34994	2.55889	2.70516	1.80115	1.01877	1.17669	1.30327	1.03957	1.28255	1.46616	1.30886	1.71482	1.29781	1.27017	2.17708	1.18652	1.23044	1.5169	1.40323	1.27056	1.55053	1.93948	1.31149	0.947929	1.32819	0.929993	1.33281	1.76198	1.20594	1.12541	2.07799	1.17289	1.56554
Cell_0158	AMPKARt2	Glucose 17 mM + Glutamine 2.500000e-01 mM + EAA 1.000000e-01 X	0.579048	0.639113	0.503289	0.46304	0.616609	0.435949	0.561318	0.623071	0.567281	0.565782	0.624698	0.62558	0.552967	0.597706	0.583472	0.47096	0.614841	0.543445	0.622758	0.347752	0.703498	0.579111	0.603614	0.690466	0.633773	0.567373	0.691109	0.641812	0.549785	0.472222	0.582533	0.711517	0.512669	0.617169	0.488625	0.556712	0.55958	0.578497	0.439443	0.636517	0.684755	0.624282	0.655494	0.564104	0.676562	0.509155	0.665715
Cell_0159	TFEB_TR	Glucose 17 mM + Glutamine 2.500000e-01 mM + EAA 1.000000e-01 X	1.29543	2.33587	1.08194	2.10431	2.62277	1.47517	1.13458	0.541001	0.76986	1.02534	0.710178	2.09362	1.81602	1.49695	0.971558	2.67926	1.36878	1.12321	1.51507	1.2317	3.63523	0.550139	1.26683	2.88443	0.862446	1.63014	1.05696	0.591303	1.25372	1.13515	0.483979	1.47959	1.41954	1.49329	2.06046	2.60931	1.14938	1.03827	1.48763	1.4744	1.61451	0.577571	0.939265	2.09025	1.5445	1.55752	1.0433
Cell_0159	FOXO_TR	Glucose 17 mM + Glutamine 2.500000e-01 mM + EAA 1.000000e-01 X	0.990649	1.73886	2.22568	1.05348	2.03463	2.0546	1.47951	1.3672	1.05508	1.26522	1.63072	1.11706	1.48915	1.50134	1.42472	2.0813	2.5664	1.53093	1.04181	1.19539	1.21238	1.14729	1.27625	1.42902	1.28145	1.73723	1.28637	1.28425	2.18942	1.19123	1.27217	1.46795	1.38972	1.21908	1.54799	2.04732	1.27159	0.932329	1.29907	0.925804	1.26606	1.87965	1.18091	1.10338	1.9934	1.15834	1.62099
Cell_0159	AMPKARt2	Glucose 17 mM + Glutamine 2.500000e-01 mM + EAA 1.000000e-01 X	0.58647	0.640863	0.4875	0.454785	0.606074	0.467062	0.538966	0.621124	0.567457	0.570248	0.618867	0.652666	0.596037	0.604052	0.587282	0.42594	0.626476	0.570371	0.612933	0.330309	0.690948	0.503877	0.593482	0.675309	0.651355	0.555955	0.683429	0.630258	0.546727	0.473178	0.485237	0.714643	0.526508	0.611839	0.488299	0.565385	0.571587	0.564908	0.446763	0.645076	0.680822	0.619739	0.666764	0.574891	0.677605	0.508016	0.658266
Cell_0160	TFEB_TR	Glucose 17 mM + Glutamine 2.500000e-01 mM + EAA 1.000000e-01 X	1.22235	2.46713	1.20596	2.3945	2.59484	1.64325	1.15338	0.553733	0.848031	1.07069	0.716865	2.11574	1.96271	1.36609	1.03636	2.00416	1.31545	0.958726	1.49022	1.34777	3.33201	0.5507	1.51617	2.58691	0.890547	1.65536	1.39427	0.606852	1.28479	1.07391	0.498919	1.38662	1.46724	1.26732	2.34256	3.12865	1.14051	1.04063	1.2418	1.58922	1.62979	0.60344	0.965334	2.00436	1.50289	1.35887	1.00121
Cell_0160	FOXO_TR	Glucose 17 mM + Glutamine 2.500000e-01 mM + EAA 1.000000e-01 X	0.963196	1.71833	2.19098	1.16589	2.14498	1.95802	1.49564	1.40123	1.00954	1.30028	1.62864	1.16637	1.84539	1.53639	1.50466	1.7437	2.43162	1.3251	1.03286	1.17923	1.21458	1.16319	1.19818	1.39522	1.28578	1.74268	1.29212	1.35776	2.25723	1.25135	1.24848	1.39708	1.41294	1.15168	1.52478	2.06386	1.2485	0.940673	1.28337	0.947876	1.20787	2.0077	1.18283	1.09254	2.08421	1.13479	1.66217
Cell_0160	AMPKARt2	Glucose 17 mM + Glutamine 2.500000e-01 mM + EAA 1.000000e-01 X	0.583977	0.641684	0.474591	0.483974	0.622473	0.485265	0.54036	0.60828	0.576675	0.570995	0.614607	0.653352	0.61632	0.616239	0.596954	0.400492	0.608366	0.605833	0.626905	0.307686	0.690241	0.508164	0.582727	0.67997	0.657559	0.549385	0.683849	0.619975	0.550439	0.463082	0.438466	0.731804	0.541655	0.611656	0.511118	0.57609	0.55631	0.565032	0.43686	0.649654	0.670708	0.616634	0.671191	0.578448	0.682814	0.519015	0.645434
Cell_0161	TFEB_TR	Glucose 17 mM + Glutamine 2.500000e-01 mM + EAA 1.000000e-01 X	1.25575	2.16406	1.25245	1.89858	0.692615	1.63283	1.18819	0.545801	0.863079	1.14763	0.762104	1.70819	2.20187	1.61941	1.07068	2.10152	1.40853	1.19116	1.3015	1.44855	3.37397	0.559464	1.44258	2.70686	0.966068	1.56306	1.42045	0.632706	1.36508	1.08388	0.596821	1.28177	1.38882	1.5614	2.43354	0.669778	1.18857	1.07104	1.24885	1.68768	1.35177	0.650304	0.940916	1.93407	1.53645	1.53415	0.966342
Cell_0161	FOXO_TR	Glucose 17 mM + Glutamine 2.500000e-01 mM + EAA 1.000000e-01 X	1.00997	1.69741	2.01107	1.26603	1.77784	1.98213	1.47522	1.37348	1.01182	1.28026	1.55209	1.13225	2.37405	1.58974	1.46983	1.67518	2.26662	1.33116	0.991028	1.16483	1.19908	1.19815	1.21946	1.40265	1.2941	1.6791	1.30592	1.36512	2.35428	1.23347	1.18825	1.48608	1.39787	1.11948	1.53658	2.06847	1.26044	0.960539	1.27113	0.955177	1.17725	1.9906	1.2113	1.09086	2.27347	1.14582	1.69326
Cell_0161	AMPKARt2	Glucose 17 mM + Glutamine 2.500000e-01 mM + EAA 1.000000e-01 X	0.584283	0.645944	0.48077	0.479031	0.624938	0.492883	0.558309	0.604217	0.587941	0.561056	0.614076	0.636187	0.599255	0.607463	0.598272	0.420971	0.586981	0.61808	0.638066	0.293756	0.701601	0.520046	0.597043	0.685317	0.651997	0.558969	0.698096	0.619573	0.5477	0.468133	0.456545	0.719769	0.532118	0.611721	0.522231	0.639595	0.544856	0.571689	0.426378	0.651791	0.682338	0.609676	0.669521	0.563077	0.677194	0.518995	0.643066
Cell_0162	TFEB_TR	Glucose 17 mM + Glutamine 2.500000e-01 mM + EAA 1.000000e-01 X	1.34641	1.83735	1.33437	1.37812	0.589569	1.45705	1.12978	0.544754	0.796714	1.13382	0.749915	1.60006	2.1939	1.65356	1.03011	2.29711	1.53999	1.26106	1.29242	1.54703	3.74355	0.551153	1.29616	2.74273	0.9877	1.57056	1.27629	0.682615	1.43608	1.11794	0.754741	1.52853	1.33031	2.21955	2.2908	0.827813	1.15343	1.05559	1.23313	1.46141	1.39024	0.654015	0.963495	1.91563	1.56422	1.35903	0.983194
Cell_0162	FOXO_TR	Glucose 17 mM + Glutamine 2.500000e-01 mM + EAA 1.000000e-01 X	1.07078	1.68355	1.90784	1.19142	1.79524	1.95451	1.48008	1.34565	1.02756	1.22057	1.48187	1.09281	2.39828	1.63279	1.39854	1.53017	2.23346	1.35801	1.04979	1.17964	1.19192	1.20796	1.30427	1.43858	1.26378	1.65035	1.28949	1.3737	2.35218	1.14613	1.17922	1.67669	1.33266	1.14314	1.5503	2.10227	1.24893	0.93956	1.25068	0.923081	1.17752	1.86926	1.22655	1.09141	2.25598	1.16733	1.69247
Cell_0162	AMPKARt2	Glucose 17 mM + Glutamine 2.500000e-01 mM + EAA 1.000000e-01 X	0.601531	0.659474	0.482689	0.460608	0.62029	0.508767	0.564956	0.610317	0.586909	0.565082	0.626944	0.631884	0.568573	0.601	0.60298	0.427431	0.576401	0.605578	0.630152	0.286545	0.704498	0.525597	0.603394	0.688157	0.647954	0.56026	0.698227	0.632371	0.553381	0.525916	0.421712	0.691963	0.519863	0.612132	0.51604	0.641888	0.558102	0.572356	0.444328	0.647596	0.691417	0.61007	0.675605	0.564757	0.64414	0.522427	0.6507
Cell_0163	TFEB_TR	Glucose 17 mM + Glutamine 2.500000e-01 mM + EAA 1.000000e-01 X	1.40776	1.80891	1.46812	1.71278	0.615338	1.37038	1.13938	0.543479	0.746207	1.1389	0.685532	1.70622	2.00962	1.20249	0.985672	2.22825	1.5773	1.31573	0.52365	1.64927	3.59634	0.542031	1.37387	1.92793	0.922005	1.66011	1.35796	0.695723	1.43991	1.12351	0.884114	1.76878	1.28555	2.30605	2.40114	0.808428	1.01351	0.884119	1.21223	1.18431	1.54747	0.631744	0.962066	1.93416	1.58348	1.55344	1.04874
Cell_0163	FOXO_TR	Glucose 17 mM + Glutamine 2.500000e-01 mM + EAA 1.000000e-01 X	1.11134	1.7042	1.91142	1.09783	1.69584	1.93262	1.53632	1.34363	1.02909	1.19891	1.44153	1.11564	2.01421	1.65137	1.44105	1.36746	2.31839	1.36492	1.2596	1.20736	1.21941	1.19319	1.35656	1.48851	1.26751	1.70257	1.25886	1.38782	2.25371	1.14921	1.1977	1.72242	1.3629	1.16985	1.5705	2.00183	1.18392	0.929473	1.29276	0.905892	1.1726	1.80579	1.22281	1.06765	2.05464	1.1903	1.65851
Cell_0163	AMPKARt2	Glucose 17 mM + Glutamine 2.500000e-01 mM + EAA 1.000000e-01 X	0.600287	0.66009	0.476769	0.484566	0.615502	0.527337	0.568814	0.613283	0.575026	0.589689	0.638982	0.640414	0.54598	0.609207	0.60369	0.410298	0.573321	0.598735	0.670177	0.281552	0.700337	0.517637	0.58235	0.695457	0.639117	0.566124	0.689412	0.638264	0.565392	0.543541	0.363782	0.705569	0.533456	0.615236	0.514391	0.648293	0.572016	0.568507	0.454019	0.636182	0.681286	0.623474	0.679747	0.588049	0.614829	0.538604	0.654882
Cell_0164	TFEB_TR	Glucose 17 mM + Glutamine 2.500000e-01 mM + EAA 1.000000e-01 X	1.86989	2.07248	1.56832	1.9071	0.630376	1.38556	1.12432	0.532443	0.779674	1.20529	0.670191	1.55573	1.89756	1.27147	1.00792	2.43949	1.4382	1.62687	0.538211	1.715	3.29369	0.5421	1.35077	1.40504	0.829843	1.68547	1.34064	0.659672	1.36875	1.18347	1.04544	1.55166	1.22901	1.94849	2.66153	0.816512	0.985391	0.807959	1.43253	1.29175	1.44515	0.639368	0.876248	1.95696	1.61834	2.01765	1.0783
Cell_0164	FOXO_TR	Glucose 17 mM + Glutamine 2.500000e-01 mM + EAA 1.000000e-01 X	1.12958	1.6971	1.90863	1.10646	1.60696	1.9401	1.57082	1.3598	1.04673	1.17067	1.42301	1.12275	1.81881	1.62767	1.56172	1.33269	2.24852	1.43325	1.32447	1.21645	1.22385	1.16987	1.34659	1.49477	1.32389	1.71082	1.24677	1.33034	2.19098	1.20066	1.21279	1.60337	1.48679	1.15193	1.63017	1.87265	1.16624	0.998801	1.34383	0.932003	1.14408	1.82255	1.18762	1.04592	1.88397	1.22658	1.65626
Cell_0164	AMPKARt2	Glucose 17 mM + Glutamine 2.500000e-01 mM + EAA 1.000000e-01 X	0.581052	0.651237	0.47588	0.511034	0.620598	0.549234	0.573266	0.607799	0.570858	0.597185	0.612407	0.648306	0.536716	0.602776	0.591114	0.410389	0.583328	0.595703	0.671427	0.285671	0.701833	0.523772	0.584559	0.688418	0.639692	0.582567	0.687616	0.612618	0.559892	0.485648	0.364788	0.732604	0.553712	0.614676	0.520309	0.65099	0.563259	0.563989	0.433552	0.635676	0.674152	0.63759	0.675888	0.585023	0.632086	0.539672	0.653048
Cell_0165	TFEB_TR	Glucose 17 mM + Glutamine 2.500000e-01 mM + EAA 1.000000e-01 X	2.27754	1.46684	1.61174	1.69873	0.638082	1.46676	0.974537	0.528186	0.750096	1.17235	0.701222	1.36563	1.88126	1.54634	1.09076	2.78674	1.29965	1.61895	0.538025	1.73202	3.4521	0.527335	1.46239	1.80515	0.855291	1.62514	1.24381	0.694478	1.58655	1.21811	1.28479	1.36536	0.630499	2.08149	2.57372	0.878038	1.05308	1.04981	1.46795	1.58247	1.33339	0.633211	0.885673	1.99301	1.64347	2.34845	1.00337
Cell_0165	FOXO_TR	Glucose 17 mM + Glutamine 2.500000e-01 mM + EAA 1.000000e-01 X	1.10906	1.65994	1.88499	1.11888	1.56614	1.88396	1.58675	1.3837	1.05641	1.12424	1.44567	1.07813	1.783	1.58694	1.62953	1.32801	2.05113	1.50214	1.30557	1.23112	1.22586	1.12853	1.32734	1.43461	1.34081	1.63081	1.24693	1.31084	2.22432	1.20367	1.25541	1.52696	1.76669	1.12521	1.66211	1.88829	1.19853	1.04752	1.32828	0.960895	1.10483	1.81529	1.17713	1.0931	1.81767	1.24091	1.66579
Cell_0165	AMPKARt2	Glucose 17 mM + Glutamine 2.500000e-01 mM + EAA 1.000000e-01 X	0.584476	0.62674	0.474341	0.492762	0.636992	0.568408	0.579505	0.607713	0.584671	0.582019	0.562816	0.646471	0.539818	0.586352	0.590146	0.415244	0.590032	0.592471	0.679879	0.291401	0.704342	0.546475	0.614885	0.678497	0.652866	0.572659	0.677301	0.586184	0.554465	0.46898	0.383809	0.732224	0.600829	0.613995	0.518213	0.649833	0.556332	0.573363	0.43886	0.655145	0.675063	0.63321	0.683766	0.565912	0.66856	0.53554	0.650693
Cell_0166	TFEB_TR	Glucose 17 mM + Glutamine 2.500000e-01 mM + EAA 1.000000e-01 X	1.91245	1.48803	1.62571	1.79874	0.684176	1.45496	1.00406	0.527031	0.618455	1.08214	0.737142	1.31387	2.00155	1.39595	1.22148	2.64261	1.30543	1.30707	0.541361	1.77736	3.44755	0.52711	1.71148	1.94573	0.966767	1.45786	1.31195	0.825018	2.17615	1.08618	1.46799	1.62691	0.606335	2.48697	2.35601	0.815738	1.09655	1.23553	1.15479	1.66407	1.24306	0.592085	0.950835	1.99589	1.69238	2.50187	0.899212
Cell_0166	FOXO_TR	Glucose 17 mM + Glutamine 2.500000e-01 mM + EAA 1.000000e-01 X	1.07172	1.651	1.82802	1.16348	1.50701	1.85556	1.5993	1.37291	1.03924	1.10574	1.48919	1.04433	1.67047	1.55346	1.62025	1.30503	1.95966	1.52446	1.31222	1.27332	1.25168	1.11694	1.37058	1.4028	1.32599	1.58877	1.23496	1.37075	2.31483	1.17337	1.30477	1.58795	1.68342	1.12385	1.6248	1.97341	1.17483	1.02631	1.315	0.979833	1.06111	1.77105	1.25773	1.15442	1.81742	1.23138	1.6819
Cell_0166	AMPKARt2	Glucose 17 mM + Glutamine 2.500000e-01 mM + EAA 1.000000e-01 X	0.594357	0.64481	0.47013	0.466152	0.642588	0.563949	0.594489	0.619266	0.601235	0.579582	0.533365	0.643994	0.54965	0.593682	0.600955	0.408252	0.583078	0.608213	0.688427	0.281715	0.701707	0.547684	0.616054	0.696207	0.643603	0.554586	0.666595	0.593737	0.563345	0.521849	0.373687	0.728852	0.59965	0.619605	0.508629	0.656592	0.572515	0.598793	0.471781	0.663713	0.676245	0.607869	0.695139	0.575186	0.672614	0.550587	0.658047
Cell_0167	TFEB_TR	Glucose 17 mM + Glutamine 2.500000e-01 mM + EAA 1.000000e-01 X	1.48562	2.06806	1.65501	1.61507	0.635141	1.34111	1.19879	0.518963	0.585248	1.07342	0.830402	1.40879	2.10489	2.05548	1.34593	1.35108	1.25488	1.28807	0.553592	1.85281	3.18702	0.554637	1.50156	1.58844	0.945409	1.37367	1.3319	0.910074	2.42917	1.04805	1.52628	1.7957	0.631865	2.31016	2.37028	0.753391	1.14885	1.10306	1.1161	1.56081	1.08578	0.604846	0.895831	1.9332	1.7122	1.9241	1.11845
Cell_0167	FOXO_TR	Glucose 17 mM + Glutamine 2.500000e-01 mM + EAA 1.000000e-01 X	1.08262	1.62186	1.78293	1.28489	1.47596	1.91342	1.60254	1.34201	1.04302	1.09452	1.50232	1.0613	1.5923	1.50831	1.57195	1.35009	1.95161	1.60709	1.34846	1.29273	1.25932	1.14372	1.36681	1.4169	1.34651	1.61433	1.20824	1.34576	2.3847	1.13147	1.30665	1.64771	1.61878	1.11848	1.5856	2.00148	1.12435	1.03654	1.33984	1.00812	1.03406	1.7772	1.29205	1.13648	1.80627	1.23292	1.7665
Cell_0167	AMPKARt2	Glucose 17 mM + Glutamine 2.500000e-01 mM + EAA 1.000000e-01 X	0.579556	0.643024	0.476374	0.471725	0.62875	0.556494	0.600018	0.626459	0.600096	0.58306	0.515675	0.652756	0.553529	0.609888	0.595851	0.420481	0.574433	0.61877	0.688928	0.277041	0.698136	0.535215	0.597985	0.71333	0.610256	0.565044	0.673841	0.598983	0.5643	0.549751	0.3584	0.727469	0.600283	0.626598	0.503783	0.670056	0.58049	0.613481	0.466087	0.645269	0.681072	0.582184	0.689176	0.594248	0.657032	0.5611	0.551126
Cell_0168	TFEB_TR	Glucose 17 mM + Glutamine 2.500000e-01 mM + EAA 1.000000e-01 X	1.38516	2.22856	1.71077	1.32653	0.576891	1.41631	1.21863	0.521917	0.665072	1.13966	0.966994	1.75217	1.94212	3.41055	1.3747	1.39732	1.10569	1.42948	0.562994	1.86898	3.42079	0.553001	1.28253	1.52427	0.823427	1.61723	1.35962	0.924371	2.22282	1.22957	1.54822	1.60454	0.699126	1.82501	2.35129	0.817619	1.18708	0.982132	1.29921	1.51465	1.16653	0.683733	0.866434	1.95994	1.64377	1.28268	1.02301
Cell_0168	FOXO_TR	Glucose 17 mM + Glutamine 2.500000e-01 mM + EAA 1.000000e-01 X	1.13172	1.6346	1.80288	1.33023	1.46584	1.94128	1.63143	1.36322	1.05515	1.07183	1.49748	1.12459	1.59078	1.46696	1.50514	1.28131	1.89504	1.79145	1.31909	1.2759	1.26198	1.12266	1.27117	1.38606	1.3741	1.62396	1.20101	1.25123	2.42528	1.19064	1.27721	1.57232	1.57874	1.08782	1.55633	2.04097	1.11772	1.0364	1.35158	1.03073	1.04605	1.83279	1.22705	1.10529	1.77843	1.23112	1.77233
Cell_0168	AMPKARt2	Glucose 17 mM + Glutamine 2.500000e-01 mM + EAA 1.000000e-01 X	0.564034	0.637677	0.491972	0.483829	0.623277	0.565014	0.590044	0.615942	0.588355	0.571882	0.509554	0.657858	0.552584	0.605269	0.59387	0.437047	0.576266	0.596306	0.688729	0.293324	0.695859	0.542079	0.602428	0.701079	0.582539	0.578943	0.684826	0.578472	0.560848	0.532647	0.367917	0.716979	0.600405	0.631063	0.499207	0.672489	0.562659	0.611264	0.447581	0.637208	0.683199	0.555242	0.690188	0.597098	0.654952	0.548859	0.560975
Cell_0169	TFEB_TR	Glucose 17 mM + Glutamine 2.500000e-01 mM + EAA 1.000000e-01 X	1.14456	1.66529	1.73327	2.27635	0.655445	1.53372	1.16824	0.53864	0.745717	1.21678	1.09589	2.18014	1.77962	3.38427	1.33727	1.38026	1.0609	1.50944	0.571029	1.84329	3.73721	0.531811	1.52095	1.50537	0.788304	1.88057	1.45631	0.999122	2.3006	0.690405	1.56754	1.54562	0.717559	1.76122	2.2113	0.855671	1.14851	1.07953	1.31365	1.5839	1.36854	0.763489	0.953374	2.10883	1.66883	1.73882	0.980211
Cell_0169	FOXO_TR	Glucose 17 mM + Glutamine 2.500000e-01 mM + EAA 1.000000e-01 X	1.15756	1.65144	1.79114	1.28564	1.40572	1.95986	1.65538	1.40576	1.05384	1.05301	1.53879	1.20437	1.55817	1.44385	1.45611	1.31824	1.79935	1.91872	1.28705	1.27664	1.29044	1.07368	1.30142	1.35181	1.37016	1.65547	1.2203	1.24295	2.5344	2.45069	1.28628	1.49482	1.58319	1.04919	1.52829	2.07785	1.10632	0.960423	1.35535	1.02142	1.06348	1.8564	1.27897	1.12905	1.83257	1.22587	1.80468
Cell_0169	AMPKARt2	Glucose 17 mM + Glutamine 2.500000e-01 mM + EAA 1.000000e-01 X	0.565809	0.638689	0.495446	0.47648	0.630576	0.568332	0.585104	0.595617	0.590895	0.572026	0.525616	0.656963	0.560741	0.594742	0.616465	0.439249	0.591714	0.58206	0.691186	0.29599	0.693625	0.552689	0.614706	0.69725	0.563747	0.583407	0.692632	0.573778	0.560144	1.02784	0.390557	0.714082	0.602829	0.634184	0.494959	0.665197	0.55153	0.60743	0.461368	0.654033	0.676985	0.520333	0.706842	0.602105	0.654442	0.532138	0.561971
Cell_0170	TFEB_TR	Glucose 17 mM + Glutamine 2.500000e-01 mM + EAA 1.000000e-01 X	1.17384	1.79641	1.69905	3.16714	0.679084	1.40598	1.15509	0.548496	0.791807	1.18272	1.26643	2.46231	1.86768	2.23777	1.32465	1.27548	1.0755	1.66534	0.582718	1.83794	3.37071	0.547615	1.56202	1.19126	0.831357	1.78023	1.30667	1.10092	2.61356	0.799568	1.54597	1.7096	0.662179	1.95886	2.28032	0.836278	1.07543	1.18949	1.51987	1.59728	1.27942	0.848544	0.98212	2.13512	1.81777	2.03351	0.907053
Cell_0170	FOXO_TR	Glucose 17 mM + Glutamine 2.500000e-01 mM + EAA 1.000000e-01 X	1.16617	1.6231	1.70692	1.29482	1.33125	2.01055	1.62022	1.39164	1.09239	1.05531	1.59731	1.25293	1.53696	1.41535	1.46521	1.29121	1.72376	1.87718	1.33469	1.28587	1.29096	1.08907	1.46247	1.41229	1.33499	1.73305	1.20614	1.279	2.7126	2.38001	1.32819	1.54953	1.62538	1.02678	1.55929	2.01012	1.06762	0.933048	1.38145	1.02275	1.06133	1.8244	1.40919	1.14176	1.92188	1.24484	1.84395
Cell_0170	AMPKARt2	Glucose 17 mM + Glutamine 2.500000e-01 mM + EAA 1.000000e-01 X	0.563315	0.634592	0.482947	0.467523	0.623146	0.572132	0.585059	0.579675	0.604406	0.586714	0.518102	0.667234	0.574331	0.593487	0.632061	0.434758	0.598939	0.600565	0.688325	0.278618	0.692916	0.54814	0.621362	0.714157	0.549565	0.590332	0.695693	0.588395	0.54793	1.08955	0.404505	0.714833	0.608398	0.641456	0.502726	0.670904	0.558133	0.601326	0.44372	0.659048	0.677264	0.518624	0.707246	0.611982	0.643342	0.527115	0.566963
Cell_0171	TFEB_TR	Glucose 17 mM + Glutamine 2.500000e-01 mM + EAA 1.000000e-01 X	1.61684	2.71409	1.63908	2.11408	0.581835	1.2899	1.03555	0.56897	0.711415	1.05669	1.42142	2.4721	1.3155	1.60419	1.34066	1.2313	1.02899	1.79391	0.587916	1.83433	2.8624	0.572257	1.32721	1.1377	0.911298	1.63731	1.17968	1.09241	2.59222	0.946601	1.50974	1.76991	0.614878	1.94817	2.48604	0.92117	1.04468	1.10775	1.75908	1.59657	1.18629	0.915498	0.98004	1.38487	1.82404	1.27868	0.913193
Cell_0171	FOXO_TR	Glucose 17 mM + Glutamine 2.500000e-01 mM + EAA 1.000000e-01 X	1.19623	1.62318	1.63385	1.30765	1.28012	1.98286	1.62396	1.3586	1.15023	1.08464	1.5765	1.26298	3.0786	1.40466	1.51584	1.18344	1.66627	1.8167	1.40159	1.26022	1.2432	1.12801	1.54208	1.50084	1.28509	1.74467	1.16216	1.27295	2.80968	2.34094	1.29689	1.59543	1.64675	1.0262	1.60657	1.95685	1.05749	0.960241	1.3937	1.09961	1.07948	1.78183	1.38613	1.83758	1.88392	1.26028	1.82817
Cell_0171	AMPKARt2	Glucose 17 mM + Glutamine 2.500000e-01 mM + EAA 1.000000e-01 X	0.551741	0.633007	0.48232	0.462324	0.615455	0.585879	0.583527	0.560801	0.606313	0.586222	0.48425	0.670892	0.732049	0.595328	0.628948	0.43656	0.586471	0.613082	0.686401	0.279111	0.69347	0.533646	0.627273	0.708738	0.536715	0.592529	0.688421	0.586922	0.54411	1.0966	0.440945	0.710299	0.608101	0.649987	0.514019	0.677546	0.565567	0.600485	0.394107	0.648981	0.686768	0.558516	0.700074	0.621824	0.63989	0.533092	0.582682
Cell_0172	TFEB_TR	Glucose 17 mM + Glutamine 2.500000e-01 mM + EAA 1.000000e-01 X	1.66031	2.66075	1.58345	0.939234	0.5872	1.34193	0.96354	0.628323	0.611473	1.03931	1.45909	2.20511	1.44094	1.58136	1.36926	1.29319	0.983572	1.82828	0.573045	1.83507	2.76404	0.570113	1.25779	1.36762	0.960733	1.80106	1.34739	1.11406	2.52329	1.13214	1.49645	1.75458	0.603733	1.8831	2.54585	1.06549	1.09296	0.934653	1.47049	1.75876	1.37543	0.905664	1.09741	0.934302	1.71335	1.18346	1.05694
Cell_0172	FOXO_TR	Glucose 17 mM + Glutamine 2.500000e-01 mM + EAA 1.000000e-01 X	1.24197	1.64924	1.61	1.28984	1.25427	1.91384	1.73856	1.34193	1.15188	1.09286	1.5304	1.27563	3.09512	1.41734	1.55036	1.1579	1.59655	1.8479	1.4	1.23288	1.20341	1.1326	1.5827	1.53257	1.27671	1.71566	1.1938	1.28316	2.77248	2.40509	1.20937	1.56095	1.63897	1.04284	1.57784	2.00588	1.07226	0.927783	1.3766	1.19236	1.11459	1.78255	1.34729	1.81592	1.77219	1.26028	1.77494
Cell_0172	AMPKARt2	Glucose 17 mM + Glutamine 2.500000e-01 mM + EAA 1.000000e-01 X	0.552062	0.6417	0.502882	0.4556	0.623412	0.589406	0.589426	0.53274	0.609022	0.586898	0.481846	0.656782	0.751654	0.597155	0.627363	0.448288	0.581887	0.609794	0.695576	0.293765	0.692047	0.508991	0.623209	0.688724	0.517067	0.596224	0.694484	0.58625	0.561207	1.11854	0.505458	0.716256	0.602416	0.643621	0.518398	0.653859	0.57796	0.61147	0.408368	0.652175	0.684144	0.576495	0.705907	0.615449	0.644199	0.538034	0.58692
Cell_0173	TFEB_TR	Glucose 17 mM + Glutamine 2.500000e-01 mM + EAA 1.000000e-01 X	1.36	1.73234	1.55134	1.1594	0.684588	1.4155	1.03636	0.707332	0.798313	1.09037	1.49506	2.06567	1.46188	2.04219	1.37906	1.30193	0.961395	1.91968	0.562191	1.85216	2.79044	0.567683	1.24223	1.2949	0.855266	1.92121	0.544508	1.2875	2.7024	1.32879	1.42789	1.78373	0.605618	2.08511	2.44192	0.986817	1.1724	0.938361	1.24857	1.85665	1.53127	0.872889	1.22793	1.02818	1.72472	2.02355	1.07599
Cell_0173	FOXO_TR	Glucose 17 mM + Glutamine 2.500000e-01 mM + EAA 1.000000e-01 X	1.25511	1.6206	1.61273	1.37396	1.28441	1.90257	1.82002	1.30147	1.12487	1.08014	1.54661	1.29487	3.12799	1.40331	1.5601	1.16323	1.5169	1.7867	1.34002	1.24338	1.18524	1.1368	1.67444	1.53283	1.31412	1.77028	1.91681	1.32722	2.72242	2.48373	1.21405	1.56123	1.6419	1.08123	1.53215	1.97841	1.06459	0.903045	1.37638	1.20824	1.11416	1.80441	1.42505	1.78396	1.72112	1.29429	1.75742
Cell_0173	AMPKARt2	Glucose 17 mM + Glutamine 2.500000e-01 mM + EAA 1.000000e-01 X	0.565137	0.64364	0.517084	0.466258	0.606328	0.586351	0.603248	0.518118	0.628655	0.607068	0.501461	0.658331	0.751795	0.58721	0.624073	0.454671	0.585659	0.621899	0.706217	0.297554	0.692507	0.486808	0.617431	0.693007	0.503864	0.606875	0.576925	0.601189	0.565152	1.11052	0.524191	0.72069	0.6055	0.632626	0.520346	0.621688	0.587252	0.608747	0.450987	0.657692	0.672261	0.565797	0.7039	0.617744	0.638978	0.54009	0.581319
Cell_0174	TFEB_TR	Glucose 17 mM + Glutamine 2.500000e-01 mM + EAA 1.000000e-01 X	1.30883	1.63638	1.47925	1.12498	0.691843	1.46251	1.05381	0.793713	1.10819	1.0444	1.56488	2.26028	1.55025	2.45909	1.31467	1.25011	0.959772	1.92222	0.578735	1.82652	2.80704	0.570915	1.26023	1.03503	0.794655	1.78708	0.489914	1.32758	2.66258	1.44336	1.27527	1.80161	0.628877	2.23941	2.23424	0.815604	1.17738	1.03703	1.46402	1.80792	1.61692	0.866848	1.21227	1.15448	1.80395	2.03072	0.968937
Cell_0174	FOXO_TR	Glucose 17 mM + Glutamine 2.500000e-01 mM + EAA 1.000000e-01 X	1.21154	1.561	1.53383	1.46848	1.35664	1.84857	1.77628	1.26495	1.1203	1.11951	1.51621	1.28151	3.15136	1.41321	1.58399	1.15094	1.44194	1.61937	1.29837	1.25894	1.18141	1.13601	1.70572	1.51001	1.32193	1.84957	1.86838	1.33903	2.76523	2.37445	1.25106	1.59889	1.61767	1.10792	1.53005	1.83785	1.0456	0.930029	1.37819	1.19484	1.12369	1.7915	1.43522	1.77948	1.68349	1.35963	1.76589
Cell_0174	AMPKARt2	Glucose 17 mM + Glutamine 2.500000e-01 mM + EAA 1.000000e-01 X	0.572401	0.643664	0.51235	0.485837	0.565365	0.587901	0.61452	0.518035	0.635349	0.619122	0.521593	0.673298	0.749459	0.57055	0.61845	0.448363	0.573282	0.639205	0.698016	0.299019	0.697758	0.484921	0.622986	0.702358	0.508266	0.605738	0.562808	0.604731	0.557876	1.02888	0.505341	0.703184	0.617004	0.643562	0.51607	0.610814	0.573656	0.593472	0.434742	0.651283	0.683296	0.572563	0.696218	0.625057	0.632474	0.55131	0.583874
Cell_0175	TFEB_TR	Glucose 17 mM + Glutamine 2.500000e-01 mM + EAA 1.000000e-01 X	1.42202	2.07611	1.35092	0.947563	0.653576	1.41761	1.08243	0.904306	1.11095	1.33254	1.52837	2.41128	1.70067	1.98801	1.25786	1.23098	1.02063	1.61207	0.582186	1.75016	2.81478	0.569443	1.24466	1.02624	1.01454	1.83028	0.54389	1.17608	2.38788	1.26189	1.20907	1.75185	0.659893	2.09405	2.18105	1.01839	1.11201	0.939488	1.38815	1.91045	1.01661	0.838749	1.09904	1.08251	1.85624	1.31335	0.983372
Cell_0175	FOXO_TR	Glucose 17 mM + Glutamine 2.500000e-01 mM + EAA 1.000000e-01 X	1.16761	1.54376	1.37414	1.41235	1.44573	1.75482	1.72715	1.27012	1.12752	2.08412	1.38274	1.2453	3.14667	1.50044	1.62084	1.23392	1.3822	1.61839	1.26207	1.24616	1.1951	1.10306	1.6273	1.45313	1.30229	1.86012	2.14434	1.3254	2.83468	2.14607	1.16551	1.585	1.54241	1.07748	1.5301	1.80667	1.05972	0.90767	1.33943	1.17861	2.54269	1.78163	1.38646	1.80373	1.61842	1.39691	1.77414
Cell_0175	AMPKARt2	Glucose 17 mM + Glutamine 2.500000e-01 mM + EAA 1.000000e-01 X	0.574227	0.660329	0.50569	0.480863	0.552836	0.591774	0.618035	0.508905	0.616375	0.632381	0.549178	0.668455	0.75552	0.580573	0.617459	0.454112	0.558539	0.628644	0.661145	0.307939	0.698275	0.493149	0.62768	0.697139	0.511722	0.595159	0.562065	0.603499	0.567486	1.0133	0.521751	0.689539	0.625664	0.661622	0.506742	0.600851	0.566605	0.597267	0.414081	0.652937	0.534003	0.58593	0.702997	0.633097	0.638076	0.56333	0.582293
Cell_0176	TFEB_TR	Glucose 17 mM + Glutamine 2.500000e-01 mM + EAA 1.000000e-01 X	1.47034	1.89991	1.32514	2.09538	0.668542	1.3822	1.1903	1.02744	0.943051	1.43515	1.47068	2.42272	1.61339	1.54267	1.3095	1.24305	1.0836	1.31951	0.563446	1.69975	2.73744	0.573493	1.06037	1.24799	1.20937	2.04904	0.614682	1.2084	2.3877	0.903963	1.26	1.63318	0.668927	2.19676	2.41303	1.25519	1.13635	0.764277	1.09658	2.00121	1.10994	0.790942	1.03222	0.992393	1.91214	1.24008	1.03167
Cell_0176	FOXO_TR	Glucose 17 mM + Glutamine 2.500000e-01 mM + EAA 1.000000e-01 X	1.16453	1.60047	1.40809	1.37206	1.54393	1.75182	1.71705	1.27544	1.13448	2.12451	1.28908	1.23107	3.12748	1.54052	1.65752	1.3179	1.34955	1.71173	1.16916	1.22409	1.18833	1.06273	1.53313	1.39517	1.31809	1.84611	2.32135	1.31827	2.81005	2.07557	1.09265	1.51264	1.51686	1.05379	1.53115	1.90811	1.10431	0.866038	1.29073	1.11045	2.49036	1.7976	1.424	1.84437	1.58111	1.39083	1.7956
Cell_0176	AMPKARt2	Glucose 17 mM + Glutamine 2.500000e-01 mM + EAA 1.000000e-01 X	0.583008	0.670622	0.509915	0.469193	0.555777	0.602326	0.623405	0.49925	0.60645	0.628228	0.546358	0.662074	0.756534	0.601589	0.61027	0.467349	0.550378	0.613484	0.624905	0.320362	0.693639	0.502026	0.625879	0.698462	0.504173	0.594745	0.562918	0.608959	0.581894	1.07263	0.53876	0.699519	0.636619	0.663029	0.504697	0.583161	0.59288	0.607235	0.429523	0.66558	0.559575	0.58767	0.708887	0.634702	0.648975	0.558739	0.589876
Cell_0177	TFEB_TR	Glucose 17 mM + Glutamine 2.500000e-01 mM + EAA 1.000000e-01 X	1.34616	1.62861	1.43251	2.98783	0.651536	1.57635	1.17268	1.13374	0.968038	1.3276	1.49751	2.41225	1.41376	1.67081	1.37288	1.3147	1.1113	1.40634	0.57343	1.70872	2.75388	0.572298	1.24569	0.646011	1.12362	1.91655	0.612042	1.34561	2.48286	0.876198	1.23859	1.5971	0.689887	2.47309	2.47921	1.12509	1.252	0.769038	1.21182	1.93012	1.2201	0.778028	1.07018	0.849052	1.9148	1.65674	1.01918
Cell_0177	FOXO_TR	Glucose 17 mM + Glutamine 2.500000e-01 mM + EAA 1.000000e-01 X	1.16313	1.67591	1.69423	1.44541	1.56879	1.75938	1.67438	1.27542	1.13104	2.18027	1.27397	1.23269	3.09363	1.47653	1.69368	1.26722	1.32915	1.69004	1.08757	1.21851	1.15313	1.02523	1.51299	1.0809	1.3446	1.83743	2.22255	1.29171	2.76552	2.17047	1.17999	1.48768	1.56655	1.11135	1.53434	1.92256	1.13416	0.900042	1.25238	1.08781	2.48342	1.81186	1.48147	1.90089	1.57061	1.37698	1.78973
Cell_0177	AMPKARt2	Glucose 17 mM + Glutamine 2.500000e-01 mM + EAA 1.000000e-01 X	0.585234	0.65128	0.514262	0.480129	0.542164	0.605553	0.635196	0.497484	0.615209	0.639593	0.521061	0.673794	0.754011	0.595064	0.60631	0.464152	0.535082	0.619472	0.626914	0.330681	0.691387	0.513949	0.615125	0.622996	0.502203	0.6049	0.564194	0.60368	0.587909	1.05769	0.528559	0.708848	0.645774	0.660383	0.506362	0.579643	0.615679	0.606705	0.427659	0.666896	0.558135	0.589188	0.707583	0.633624	0.65584	0.550851	0.603259
Cell_0178	TFEB_TR	Glucose 17 mM + Glutamine 2.500000e-01 mM + EAA 1.000000e-01 X	1.14269	1.79638	1.55226	2.42952	0.609963	1.81376	1.13777	1.20014	1.05762	1.33719	1.45251	2.22547	1.47134	1.531	1.36824	1.40186	1.15363	1.49716	0.607115	1.76441	2.7826	0.564032	1.72932	0.635477	1.01316	1.68043	0.588852	1.23811	2.34868	1.13783	1.17083	1.66077	0.771038	2.12545	2.2773	1.39849	1.23182	0.89542	1.39137	2.03051	1.17217	0.81183	1.13111	0.83692	1.93913	1.66414	1.03224
Cell_0178	FOXO_TR	Glucose 17 mM + Glutamine 2.500000e-01 mM + EAA 1.000000e-01 X	1.1611	1.66691	1.92187	1.48815	1.49555	1.72378	1.72127	1.27214	1.0987	2.1671	1.236	1.22044	3.10951	1.43942	1.69077	1.26184	1.31799	1.71306	1.07297	1.2328	1.14183	0.998744	1.54193	1.08211	1.33605	1.81147	2.14433	1.24265	2.81823	2.22946	1.26806	1.5551	1.58293	1.18535	1.50274	1.79583	1.14199	0.963703	1.20993	1.16473	2.50633	1.87	1.51798	1.94237	1.57568	1.38014	1.73027
Cell_0178	AMPKARt2	Glucose 17 mM + Glutamine 2.500000e-01 mM + EAA 1.000000e-01 X	0.568354	0.62507	0.499381	0.491926	0.533991	0.594872	0.63605	0.495192	0.621861	0.64099	0.533367	0.674434	0.754879	0.591024	0.6162	0.477808	0.542515	0.617398	0.643921	0.333012	0.68597	0.515406	0.596833	0.63473	0.518146	0.618325	0.561306	0.60786	0.585962	1.01024	0.542544	0.706361	0.634133	0.662803	0.506522	0.588603	0.608394	0.615067	0.423975	0.653727	0.573367	0.58022	0.706517	0.635104	0.655032	0.562225	0.551957
Cell_0179	TFEB_TR	Glucose 17 mM + Glutamine 2.500000e-01 mM + EAA 1.000000e-01 X	1.24969	1.9098	1.70198	1.86922	0.742092	1.7851	1.12222	1.21431	1.00732	1.45641	1.35155	2.08142	1.5705	1.59671	1.34663	1.36092	1.16957	1.29708	0.645674	1.8312	2.54076	0.57932	1.61026	0.624629	1.04201	1.82434	0.582619	1.12469	2.26996	1.25561	1.19106	1.61313	0.888903	1.85371	2.22113	2.01065	1.13172	1.21464	1.25088	2.04855	1.11338	0.870003	1.11582	0.985345	2.09402	1.31964	0.985465
Cell_0179	FOXO_TR	Glucose 17 mM + Glutamine 2.500000e-01 mM + EAA 1.000000e-01 X	1.20006	1.61521	1.93516	1.54028	1.45187	1.76984	1.45521	1.22991	1.05675	2.07627	1.17523	1.19522	3.23898	1.43894	1.65549	1.38806	1.32747	1.78042	1.04485	1.26017	1.16088	1.00999	1.50635	1.06059	1.32615	1.80475	2.06405	1.20042	2.85849	2.24629	1.2543	1.58148	1.55425	1.2111	1.47505	1.6565	1.14197	1.3503	1.16682	1.16213	2.64265	1.91338	1.52692	1.96635	1.60463	1.38695	1.69612
Cell_0179	AMPKARt2	Glucose 17 mM + Glutamine 2.500000e-01 mM + EAA 1.000000e-01 X	0.565148	0.610603	0.48659	0.487331	0.531217	0.598958	0.662699	0.503011	0.621788	0.636915	0.552706	0.661752	0.750799	0.609952	0.61165	0.510072	0.601448	0.614165	0.640142	0.333145	0.687223	0.502453	0.606022	0.630101	0.536848	0.629813	0.54891	0.631045	0.575023	1.02852	0.557027	0.709299	0.620554	0.665108	0.509042	0.586507	0.592892	0.581118	0.456429	0.648468	0.613958	0.56726	0.693642	0.628488	0.653891	0.57929	0.472773
Cell_0180	TFEB_TR	Glucose 17 mM + Glutamine 2.500000e-01 mM + EAA 1.000000e-01 X	1.49258	1.81894	1.87281	1.69426	0.946567	1.5329	1.13794	1.21737	0.961484	1.38427	1.35264	2.21046	1.50228	2.11835	1.31234	1.30467	1.17188	1.18748	0.689979	1.86226	2.39147	0.602395	1.27875	0.62834	1.14729	1.91534	0.56387	1.22103	2.28355	1.31211	1.2395	1.58213	1.00606	2.58987	2.20989	1.72773	1.16438	1.23844	1.11144	1.60199	1.14069	0.889756	1.04865	1.02367	2.1701	1.45097	0.919725
Cell_0180	FOXO_TR	Glucose 17 mM + Glutamine 2.500000e-01 mM + EAA 1.000000e-01 X	1.25185	1.62348	1.84619	1.63875	1.4702	1.8339	1.49397	1.20341	1.04268	2.01456	1.14657	1.18288	3.30454	1.38216	1.65306	1.44775	1.33625	1.66049	0.992485	1.28507	1.17763	1.02237	1.44131	1.02644	1.33683	1.84495	1.9118	1.15811	2.82415	2.32844	1.27479	1.56795	1.55855	1.2099	1.48955	1.55848	1.1126	1.37125	1.14427	1.07956	2.85613	1.79296	1.41955	1.98644	1.60124	1.39082	1.71417
Cell_0180	AMPKARt2	Glucose 17 mM + Glutamine 2.500000e-01 mM + EAA 1.000000e-01 X	0.584421	0.601287	0.512569	0.476885	0.514247	0.612467	0.673868	0.511964	0.61488	0.651454	0.545826	0.666777	0.750311	0.607701	0.596478	0.494253	0.660049	0.640897	0.629247	0.333064	0.710917	0.496412	0.642365	0.631621	0.535889	0.631953	0.538638	0.631853	0.572099	1.02711	0.541174	0.712129	0.622925	0.672006	0.50778	0.567221	0.584401	0.57901	0.476293	0.660476	0.637528	0.579555	0.679355	0.631496	0.662003	0.573209	0.470896
Cell_0181	TFEB_TR	Glucose 17 mM + Glutamine 2.500000e-01 mM + EAA 1.000000e-01 X	1.37089	1.83156	1.97865	1.46882	0.885959	1.36367	1.02821	1.25312	1.00322	1.29629	1.31808	2.1527	1.57387	2.00775	1.28061	1.39065	1.21828	1.24412	0.708309	1.88657	0.950199	0.593328	1.52598	0.62636	1.26663	1.77715	0.543518	1.22773	2.16829	1.43197	1.30015	1.72593	1.11543	3.06368	2.07483	1.25202	1.16526	1.25815	1.30905	1.47244	1.10765	0.845106	1.0124	1.06108	2.16596	1.96016	0.998751
Cell_0181	FOXO_TR	Glucose 17 mM + Glutamine 2.500000e-01 mM + EAA 1.000000e-01 X	1.25876	1.62788	1.85376	1.6004	1.45159	1.77814	1.45145	1.24773	1.05496	2.03828	1.10995	1.20512	3.18057	1.34241	1.67135	1.4068	1.35369	1.47389	0.975346	1.29699	1.6641	0.979939	1.47122	0.992555	1.3413	1.86899	1.88626	1.09715	2.84284	2.47242	1.357	1.61977	1.60289	1.19517	1.50933	1.49847	1.08999	1.39726	1.17842	1.09653	2.87844	1.6234	1.28191	1.98868	1.57007	1.41384	1.73201
Cell_0181	AMPKARt2	Glucose 17 mM + Glutamine 2.500000e-01 mM + EAA 1.000000e-01 X	0.581456	0.598763	0.539261	0.469568	0.508732	0.604812	0.66172	0.503205	0.598924	0.660254	0.552804	0.678188	0.754601	0.590278	0.609145	0.44855	0.670122	0.657649	0.625347	0.325427	0.75267	0.497221	0.643575	0.650982	0.5254	0.625332	0.526126	0.619624	0.574581	0.980252	0.552569	0.702449	0.612146	0.678907	0.502289	0.559042	0.582548	0.580394	0.464444	0.661259	0.640856	0.601011	0.684121	0.652251	0.665819	0.559963	0.494767
Cell_0182	TFEB_TR	Glucose 17 mM + Glutamine 2.500000e-01 mM + EAA 1.000000e-01 X	1.21754	1.9966	2.05044	1.35305	0.728515	1.38995	0.949479	1.27782	1.09642	1.35008	1.19264	1.91807	1.71832	1.54861	1.29473	1.39194	1.19117	1.19912	0.72712	1.92193	1.03574	0.574834	1.74186	0.608393	1.25614	1.8608	0.546976	1.15181	2.13725	1.40824	1.40119	1.79844	1.16771	2.46815	2.09364	1.90758	1.11199	1.26678	1.73026	2.1132	1.151	0.81693	1.02285	1.10212	2.35719	1.78606	1.06786
Cell_0182	FOXO_TR	Glucose 17 mM + Glutamine 2.500000e-01 mM + EAA 1.000000e-01 X	1.23926	1.5608	2.00306	1.51988	1.42907	1.7152	1.40651	1.2817	1.08438	2.09457	1.03942	1.22063	3.10179	1.38954	1.67023	1.36882	1.38136	1.40311	0.966746	1.29691	1.70339	0.918741	1.51077	0.974752	1.34848	1.86634	1.97748	1.04586	2.85199	2.61866	1.36925	1.59826	1.62697	1.20879	1.56395	1.48001	1.13754	1.38567	1.21265	1.12406	2.66999	1.59233	1.25907	2.04062	1.62975	1.44743	1.77598
Cell_0182	AMPKARt2	Glucose 17 mM + Glutamine 2.500000e-01 mM + EAA 1.000000e-01 X	0.570154	0.599478	0.523309	0.485509	0.522275	0.592159	0.663101	0.506362	0.585438	0.646189	0.569132	0.670741	0.729943	0.607322	0.633554	0.4363	0.662997	0.645863	0.626798	0.322392	0.751377	0.49279	0.609472	0.656892	0.528429	0.617968	0.522073	0.627816	0.557601	0.99427	0.583087	0.704342	0.599278	0.676263	0.502579	0.578563	0.586924	0.587729	0.466132	0.639983	0.63563	0.604659	0.686011	0.630939	0.659913	0.568965	0.475686
Cell_0183	TFEB_TR	Glucose 17 mM + Glutamine 2.500000e-01 mM + EAA 1.000000e-01 X	1.49686	2.07046	2.04362	0.927735	0.844847	1.29519	0.963497	1.24954	1.23406	1.36161	1.19733	1.9744	1.59702	1.42338	1.28943	1.20469	1.10732	1.21921	0.773666	1.90383	1.16644	0.58297	1.50511	0.600214	1.16338	1.98159	0.544772	1.24529	2.2511	1.2533	1.47993	1.71997	1.12884	2.21808	1.16225	2.45855	1.23219	1.24241	1.79367	2.35902	1.29082	0.832225	1.04264	0.953018	2.52928	1.49664	1.04533
Cell_0183	FOXO_TR	Glucose 17 mM + Glutamine 2.500000e-01 mM + EAA 1.000000e-01 X	1.25933	1.4839	1.98105	1.63414	1.49614	1.7348	1.42599	1.26446	1.1256	2.09666	1.01536	1.18486	3.1539	1.43193	1.64738	1.29468	1.35413	1.41744	0.969286	1.28294	1.6827	0.908937	1.46727	0.978702	1.37376	1.89307	1.99796	1.05296	2.69736	2.67652	1.33437	1.4758	1.57201	1.29349	1.75719	1.45745	1.17459	1.34017	1.15284	1.07782	2.41717	1.62072	1.26583	2.19444	1.76213	1.46331	1.83803
Cell_0183	AMPKARt2	Glucose 17 mM + Glutamine 2.500000e-01 mM + EAA 1.000000e-01 X	0.584206	0.588735	0.516383	0.596187	0.523575	0.598267	0.679792	0.531664	0.589989	0.639627	0.573663	0.663992	0.692807	0.627565	0.629777	0.427955	0.661906	0.650692	0.631469	0.330384	0.756074	0.498166	0.600497	0.636936	0.535675	0.613088	0.544743	0.634618	0.545404	1.02953	0.569101	0.722954	0.622268	0.673509	0.665835	0.589814	0.588478	0.592118	0.479104	0.636831	0.613098	0.597499	0.677534	0.550891	0.669025	0.578415	0.462918
Cell_0184	TFEB_TR	Glucose 17 mM + Glutamine 2.500000e-01 mM + EAA 1.000000e-01 X	1.81931	1.93304	1.89384	0.861338	0.988363	1.19667	1.00028	1.20713	1.22511	1.33343	1.28157	1.98845	1.46629	1.35551	1.24726	1.15843	1.09948	1.38249	0.770215	1.88367	1.13494	0.601091	1.3715	0.617719	1.192	1.93612	0.51979	1.3271	2.23748	1.17373	1.56551	1.58175	1.09111	2.72139	1.45399	1.85418	1.25498	1.18901	1.41194	1.75795	1.25565	0.831631	1.06543	0.883301	2.41272	2.18164	1.05692
Cell_0184	FOXO_TR	Glucose 17 mM + Glutamine 2.500000e-01 mM + EAA 1.000000e-01 X	1.32021	1.43105	1.66444	1.62749	1.55962	1.72881	1.44877	1.25679	1.13815	2.03681	1.05282	1.16407	3.12291	1.45095	1.60887	1.18949	1.29566	1.51688	1.03758	1.26843	1.65448	0.936488	1.461	0.991043	1.37813	1.9055	1.90534	1.08423	2.52477	2.60024	1.38726	1.4677	1.48579	1.3546	1.75296	1.41096	1.12885	1.3105	1.10851	1.10156	2.13943	1.6045	1.21566	2.28265	1.81038	1.4833	1.80414
Cell_0184	AMPKARt2	Glucose 17 mM + Glutamine 2.500000e-01 mM + EAA 1.000000e-01 X	0.573277	0.575845	0.54414	0.591387	0.52149	0.612253	0.683208	0.542724	0.614195	0.647238	0.581865	0.66989	0.696331	0.603178	0.606069	0.406145	0.653176	0.668186	0.629283	0.333859	0.766692	0.512496	0.614684	0.628065	0.532703	0.610337	0.540111	0.632652	0.566857	0.986072	0.539638	0.721	0.643781	0.674123	0.665232	0.579512	0.588644	0.592099	0.476989	0.658286	0.57938	0.594273	0.689705	0.480883	0.687799	0.572453	0.468336
Cell_0185	TFEB_TR	Glucose 17 mM + Glutamine 2.500000e-01 mM + EAA 1.000000e-01 X	1.64911	1.81474	1.795	0.848444	0.894077	1.59668	1.08329	1.16685	1.11176	1.3439	1.27972	1.87124	1.65636	1.73493	1.25109	1.31487	1.07163	0.842928	0.736059	1.94537	1.15651	0.601169	1.49156	0.661129	1.24299	1.94488	0.513402	1.25384	2.17554	1.35781	1.64338	1.42891	1.13716	2.88692	1.42342	1.38969	1.03499	1.24212	1.31737	1.54991	1.1597	0.82356	1.10187	0.963921	2.3389	2.47612	1.02956
Cell_0185	FOXO_TR	Glucose 17 mM + Glutamine 2.500000e-01 mM + EAA 1.000000e-01 X	1.37091	1.4025	1.43529	1.66882	1.51175	1.6745	1.44605	1.25838	1.13038	1.98787	1.05367	1.20083	3.05275	1.50685	1.61647	1.15359	1.29413	1.55154	1.11099	1.26344	1.66073	0.93579	1.51535	1.01714	1.34424	1.87734	1.80911	1.05375	2.49577	2.51768	1.46407	1.53968	1.4681	1.29809	1.75401	1.40211	1.09805	1.30613	1.16991	1.11827	1.89179	1.59071	1.1771	2.17614	1.77978	1.53106	1.7044
Cell_0185	AMPKARt2	Glucose 17 mM + Glutamine 2.500000e-01 mM + EAA 1.000000e-01 X	0.534112	0.575146	0.545097	0.589989	0.535637	0.62339	0.684348	0.542616	0.631457	0.646055	0.583395	0.661698	0.713262	0.581689	0.59872	0.413009	0.654945	0.594885	0.63184	0.335529	0.773682	0.5117	0.620434	0.641317	0.529817	0.607624	0.480042	0.638821	0.589213	0.938092	0.538705	0.704939	0.633412	0.669122	0.665574	0.583749	0.601617	0.596486	0.479438	0.662992	0.553713	0.60619	0.707443	0.459785	0.682697	0.573499	0.463494
Cell_0186	TFEB_TR	Glucose 17 mM + Glutamine 2.500000e-01 mM + EAA 1.000000e-01 X	1.28505	1.85914	1.84257	0.854699	0.833326	2.00513	1.17146	1.09832	1.24867	1.35759	1.29707	2.18723	1.91268	2.59501	1.27665	1.38366	1.09125	0.947411	0.746939	1.98278	1.22345	0.592461	1.5803	0.684634	1.22944	1.7688	0.561838	1.2186	2.22424	1.71729	1.6201	1.44607	1.19837	2.85566	1.39399	1.64444	1.02552	1.40698	1.43577	1.90243	1.22943	0.83004	1.0762	0.918261	2.56735	1.68854	0.964074
Cell_0186	FOXO_TR	Glucose 17 mM + Glutamine 2.500000e-01 mM + EAA 1.000000e-01 X	1.42476	1.41732	1.43285	1.73402	1.44429	1.66392	1.4665	1.23401	1.16046	1.99404	1.01823	1.21963	3.05561	1.54079	1.68119	1.159	1.32533	1.57928	1.09976	1.25113	1.66977	0.912665	1.50178	1.03699	1.32363	1.90652	1.90244	1.00385	2.5279	2.51065	1.4286	1.56429	1.46984	1.21595	1.74855	1.4494	1.11836	1.31284	1.18493	1.00794	1.83956	1.6144	1.18024	2.02944	1.8054	1.57045	1.66521
Cell_0186	AMPKARt2	Glucose 17 mM + Glutamine 2.500000e-01 mM + EAA 1.000000e-01 X	0.536289	0.578105	0.515341	0.597394	0.547201	0.626993	0.689582	0.551495	0.620202	0.642196	0.582489	0.645705	0.70325	0.596836	0.613451	0.429592	0.673401	0.603265	0.649865	0.339479	0.776644	0.509136	0.62224	0.640051	0.530515	0.600991	0.431445	0.639368	0.588202	0.949886	0.544499	0.711555	0.627795	0.662303	0.660091	0.594733	0.612104	0.601696	0.495354	0.656602	0.55049	0.619762	0.694928	0.47367	0.666853	0.574095	0.459549
Cell_0187	TFEB_TR	Glucose 17 mM + Glutamine 2.500000e-01 mM + EAA 1.000000e-01 X	0.705557	1.95847	1.83539	0.877992	0.857707	1.85173	1.16769	1.02197	1.40921	1.38083	1.31146	2.55928	1.85701	2.64834	1.30176	1.37779	1.25984	0.960452	0.741228	1.94901	1.02331	0.599895	1.63203	0.656997	1.26058	1.54953	0.658714	1.30974	2.25309	1.69001	1.62251	1.12352	1.192	3.1515	1.60905	1.706	1.21543	1.41712	1.14537	1.84881	1.26322	0.833642	0.925901	0.972057	2.95011	1.44547	0.995129
Cell_0187	FOXO_TR	Glucose 17 mM + Glutamine 2.500000e-01 mM + EAA 1.000000e-01 X	2.04508	1.43643	1.40665	1.73579	1.43834	1.66728	1.51789	1.20766	1.18054	2.06574	1.02778	1.20338	2.93145	1.51286	1.69071	1.14089	1.33778	1.64437	1.03892	1.25265	1.65281	0.919659	1.45537	1.02988	1.34703	1.9738	2.12623	1.03433	2.54635	2.47276	1.36184	1.45552	1.43422	1.23631	1.74842	1.47154	1.10143	1.33202	1.1244	0.992906	1.90415	1.63889	1.1776	1.97251	1.89042	1.57506	1.64965
Cell_0187	AMPKARt2	Glucose 17 mM + Glutamine 2.500000e-01 mM + EAA 1.000000e-01 X	0.503794	0.580277	0.51411	0.597936	0.548629	0.618246	0.689008	0.557486	0.607958	0.648192	0.603259	0.653716	0.697696	0.592621	0.610021	0.421622	0.671497	0.613045	0.653357	0.333729	0.783682	0.522841	0.624057	0.629314	0.528425	0.590692	0.410756	0.630169	0.584811	0.949553	0.547835	0.491313	0.632647	0.660878	0.656766	0.586971	0.596527	0.599391	0.495895	0.66533	0.559361	0.609227	0.681427	0.501545	0.671587	0.560348	0.459796
Cell_0188	TFEB_TR	Glucose 17 mM + Glutamine 2.500000e-01 mM + EAA 1.000000e-01 X	0.851964	2.00577	1.73137	0.920895	0.813388	1.68765	1.12631	0.986104	1.32638	1.32915	1.2108	2.41621	1.62767	1.7666	1.37664	1.42771	1.23654	0.948444	0.75507	1.95615	0.94492	0.619407	1.68132	0.671644	1.25275	1.87479	0.768043	1.47764	2.1813	1.27013	1.71834	1.17663	1.17183	3.04262	1.60451	1.45146	1.27114	1.27729	1.00991	1.75608	1.1487	0.863036	0.820716	1.15263	3.2787	1.7123	1.0332
Cell_0188	FOXO_TR	Glucose 17 mM + Glutamine 2.500000e-01 mM + EAA 1.000000e-01 X	2.14538	1.41067	1.3373	1.70838	1.43665	1.60369	1.58445	1.21435	1.15473	2.15904	1.04166	1.20614	2.67708	1.52329	1.65707	1.13442	1.34192	1.64569	1.02387	1.2926	1.60532	0.936335	1.48225	1.104	1.36608	1.93991	2.20022	1.08498	2.50723	2.38865	1.36868	1.47462	1.44059	1.32612	1.74514	1.41114	1.06676	1.36477	1.12476	1.1161	1.94612	1.62985	1.15608	1.93738	1.92326	1.58175	1.59486
Cell_0188	AMPKARt2	Glucose 17 mM + Glutamine 2.500000e-01 mM + EAA 1.000000e-01 X	0.517199	0.58183	0.539565	0.592183	0.544067	0.611084	0.693783	0.561577	0.611546	0.6422	0.613727	0.667481	0.703734	0.562826	0.579868	0.420957	0.656719	0.604676	0.641765	0.328463	0.785756	0.530889	0.632325	0.642973	0.532765	0.583381	0.387615	0.632166	0.593876	0.924698	0.560242	0.492635	0.631957	0.660135	0.662804	0.591591	0.580292	0.592644	0.490048	0.663866	0.543732	0.596621	0.687474	0.532908	0.68061	0.558003	0.459205
Cell_0189	TFEB_TR	Glucose 17 mM + Glutamine 2.500000e-01 mM + EAA 1.000000e-01 X	0.830012	1.91872	1.68109	0.941667	0.858187	1.68792	1.12724	0.991189	1.37521	1.23781	1.17774	2.18545	1.69762	1.64003	0.585686	1.36468	1.02907	1.01074	0.864118	1.99348	1.1891	0.629372	1.55375	0.780252	1.16705	2.18651	0.868884	1.56424	2.09922	1.12426	1.77354	1.08336	1.21369	2.40654	1.25887	1.41956	1.28563	1.28127	1.47536	2.11911	1.10407	0.93402	0.914256	0.951716	3.30461	1.11165	1.02336
Cell_0189	FOXO_TR	Glucose 17 mM + Glutamine 2.500000e-01 mM + EAA 1.000000e-01 X	2.1605	1.37422	1.33419	1.79025	1.41467	1.56792	1.664	1.26247	1.17708	2.13583	0.986213	1.2189	2.54419	1.58789	1.78314	1.14757	1.35131	1.62362	1.08756	1.32125	1.56322	0.917386	1.50508	1.31987	1.33811	1.83558	2.20705	1.06303	2.41741	2.3395	1.39801	1.49542	1.47608	1.38032	1.7006	1.35672	1.08609	1.39668	1.15658	1.12035	1.9793	1.64067	1.14097	1.88579	1.85109	1.4025	1.54662
Cell_0189	AMPKARt2	Glucose 17 mM + Glutamine 2.500000e-01 mM + EAA 1.000000e-01 X	0.519672	0.576617	0.550235	0.601113	0.528945	0.615614	0.700469	0.567973	0.609221	0.609238	0.597272	0.663818	0.690125	0.56752	0.628716	0.443698	0.664421	0.600735	0.647621	0.331092	0.771291	0.527473	0.647087	0.648715	0.547205	0.585415	0.380014	0.645445	0.609543	0.926088	0.562786	0.478943	0.637	0.65267	0.666697	0.61749	0.591183	0.593189	0.508397	0.644613	0.516975	0.605296	0.683866	0.566518	0.674263	0.559456	0.462317
Cell_0190	TFEB_TR	Glucose 17 mM + Glutamine 2.500000e-01 mM + EAA 1.000000e-01 X	0.749761	1.80547	1.67785	0.948649	0.931479	1.43824	1.11955	1.00259	1.43652	1.34756	1.27325	2.12059	1.99022	2.90438	0.639599	1.2205	1.05384	1.07635	0.884354	1.9827	1.28307	0.626957	1.42666	0.895815	1.16805	1.90307	0.984892	1.45214	2.22939	1.16941	1.83404	1.01891	1.26249	2.2572	1.31421	1.56707	1.26519	1.37111	1.66435	2.11574	1.15298	1.01717	0.993258	0.786371	3.00432	1.35898	1.01926
Cell_0190	FOXO_TR	Glucose 17 mM + Glutamine 2.500000e-01 mM + EAA 1.000000e-01 X	2.21097	1.36822	1.33698	1.91709	1.40181	1.66471	1.71013	1.3139	1.22854	1.99402	0.912582	1.22616	2.46618	1.58625	1.78622	1.14756	1.37485	1.7086	1.13652	1.31083	1.57562	0.888594	1.45042	1.48439	1.31472	1.80723	2.32995	1.02565	2.47087	2.2596	1.42913	1.49813	1.47278	1.405	1.69366	1.38191	1.10439	1.4149	1.15807	1.03743	1.95842	1.75721	1.12984	1.8414	1.73505	1.38561	1.50238
Cell_0190	AMPKARt2	Glucose 17 mM + Glutamine 2.500000e-01 mM + EAA 1.000000e-01 X	0.514806	0.572734	0.543474	0.611219	0.519611	0.618141	0.680581	0.563927	0.612037	0.575218	0.590141	0.659778	0.672013	0.590734	0.625681	0.463943	0.677125	0.619459	0.656354	0.322734	0.758048	0.530088	0.635024	0.620942	0.554463	0.588748	0.379839	0.64966	0.616669	0.931061	0.544218	0.486565	0.644043	0.645729	0.663508	0.627185	0.59641	0.602304	0.523943	0.646459	0.521526	0.604249	0.683331	0.580134	0.668624	0.54787	0.465162
Cell_0191	TFEB_TR	Glucose 17 mM + Glutamine 2.500000e-01 mM + EAA 1.000000e-01 X	0.738338	1.81339	1.6726	0.960938	0.873938	1.20801	1.0859	0.988761	1.18338	1.51679	1.30322	2.09373	1.99768	3.66575	0.652842	1.31821	1.12704	1.07373	0.795414	1.94586	1.29684	0.627656	1.77279	0.996625	1.20731	1.67467	1.09603	1.41833	1.45093	1.14378	1.91444	1.01639	1.2542	2.54206	1.66203	1.55751	1.16081	1.33391	1.32333	1.55794	1.18813	1.12656	0.891639	1.35729	2.77496	1.43187	0.954245
Cell_0191	FOXO_TR	Glucose 17 mM + Glutamine 2.500000e-01 mM + EAA 1.000000e-01 X	2.28162	1.36682	1.339	1.89486	1.39071	1.76084	1.70077	1.30379	1.20082	1.91475	0.879291	1.25368	2.30585	1.51741	1.7143	1.15251	1.40069	1.84473	1.10601	1.2859	1.61824	0.886923	1.43694	1.44556	1.36038	1.86881	2.36844	1.03378	1.61864	2.10949	1.46322	1.48064	1.47884	1.44513	1.7897	1.36211	1.09071	1.4377	1.16657	1.03553	1.89125	1.91801	1.10019	1.79446	1.67841	1.47979	1.4309
Cell_0191	AMPKARt2	Glucose 17 mM + Glutamine 2.500000e-01 mM + EAA 1.000000e-01 X	0.504787	0.575643	0.54057	0.606128	0.523333	0.617333	0.634563	0.562147	0.630418	0.563659	0.596546	0.660682	0.674135	0.582755	0.617058	0.472463	0.666705	0.623897	0.650938	0.313934	0.762612	0.534097	0.607884	0.61248	0.550004	0.586329	0.360693	0.639882	0.590679	0.913366	0.536758	0.510235	0.650903	0.652902	0.659776	0.626792	0.573004	0.59718	0.514479	0.662877	0.520785	0.583938	0.699144	0.56204	0.671276	0.552821	0.460415
Cell_0192	TFEB_TR	Glucose 17 mM + Glutamine 2.500000e-01 mM + EAA 1.000000e-01 X	0.766129	1.793	1.71216	0.95795	0.957488	1.32191	1.17252	0.975556	1.10955	1.45655	1.28978	2.20149	1.82198	2.71436	0.648436	1.46512	1.01692	1.08682	0.874808	1.92181	1.49357	0.636887	2.13441	1.09865	1.17813	1.75197	1.15222	1.65753	1.52581	1.36936	1.86571	1.03713	1.24544	2.54835	1.44349	1.38611	1.15633	1.27249	1.16601	1.25607	1.25639	1.24757	0.82516	1.77325	2.7856	1.34699	0.885471
Cell_0192	FOXO_TR	Glucose 17 mM + Glutamine 2.500000e-01 mM + EAA 1.000000e-01 X	2.24715	1.34173	1.38746	1.76722	1.3635	1.73731	1.71182	1.27306	1.15054	1.89637	0.863013	1.30457	2.18776	1.51381	1.69137	1.16664	1.40424	1.93329	1.11063	1.25586	1.67689	0.892545	1.52551	1.33222	1.44215	1.93963	2.23472	1.05716	1.68801	2.00606	1.44325	1.47936	1.47517	1.45322	1.81647	1.26978	1.12579	1.47907	1.17501	1.05106	1.88962	1.96429	1.07458	1.74532	1.71244	1.61137	1.37781
Cell_0192	AMPKARt2	Glucose 17 mM + Glutamine 2.500000e-01 mM + EAA 1.000000e-01 X	0.492887	0.572582	0.547058	0.597511	0.521745	0.621435	0.594465	0.571518	0.631373	0.565455	0.603335	0.668159	0.679375	0.568881	0.613393	0.475653	0.643991	0.613712	0.655257	0.326382	0.762219	0.533022	0.608829	0.631034	0.551305	0.59508	0.348192	0.636821	0.620768	0.902075	0.553748	0.510937	0.669219	0.658097	0.657575	0.632639	0.567392	0.568066	0.516634	0.662464	0.487029	0.579429	0.692549	0.554164	0.672481	0.56285	0.444148
Cell_0193	TFEB_TR	Glucose 17 mM + Glutamine 2.500000e-01 mM + EAA 1.000000e-01 X	0.764926	1.67775	1.73982	0.963841	1.14024	1.52958	1.40828	1.02965	1.27161	1.30378	1.31907	1.61667	1.87059	1.74235	0.647445	1.29273	1.005	1.13343	1.05047	1.933	1.56111	0.629271	1.68505	1.17218	1.21299	1.78182	1.22496	1.87638	1.2111	1.54379	1.7847	1.18319	1.27052	2.639	1.26683	1.277	1.17493	1.25448	1.14058	1.37743	1.25745	1.27929	0.887995	1.25308	2.75256	1.30126	0.927437
Cell_0193	FOXO_TR	Glucose 17 mM + Glutamine 2.500000e-01 mM + EAA 1.000000e-01 X	2.20128	1.32578	1.40822	1.72347	1.33024	1.70957	1.75849	1.32082	1.14287	1.81079	0.857645	1.58887	2.12157	1.584	1.70334	1.16054	1.40497	1.98182	1.18639	1.24641	1.7824	0.871455	1.57639	1.2992	1.51474	1.99326	2.11192	1.08342	1.60311	1.94677	1.42297	1.50904	1.4073	1.39969	1.72396	1.27759	1.1809	1.49732	1.2172	1.0319	1.90809	1.86599	1.13709	1.69812	1.76047	1.65813	1.35448
Cell_0193	AMPKARt2	Glucose 17 mM + Glutamine 2.500000e-01 mM + EAA 1.000000e-01 X	0.490393	0.569246	0.550007	0.59321	0.522036	0.622556	0.577965	0.572171	0.620784	0.569573	0.606102	0.549172	0.673558	0.580412	0.624208	0.480614	0.634123	0.624209	0.66697	0.334232	0.743872	0.531583	0.614914	0.625359	0.561848	0.613096	0.345089	0.650325	0.614412	0.911776	0.559918	0.505343	0.672192	0.64376	0.652006	0.623222	0.602236	0.547044	0.535186	0.664332	0.477164	0.598939	0.680164	0.57246	0.673443	0.558676	0.439291
Cell_0194	TFEB_TR	Glucose 17 mM + Glutamine 2.500000e-01 mM + EAA 1.000000e-01 X	0.721436	1.59167	1.67949	1.00803	1.08048	1.55624	1.50693	1.1271	1.15708	1.25031	1.32035	1.23878	1.96866	1.77797	0.649893	1.1804	1.07652	1.14941	1.05801	1.96443	1.37141	0.613664	1.01101	1.28529	1.33333	1.92426	1.36422	1.86273	1.16932	1.28322	1.80064	1.29196	1.28671	3.07282	1.79337	1.28796	1.12364	1.21734	1.09221	1.52169	1.156	1.20901	0.755049	0.831568	2.5868	1.44816	0.971794
Cell_0194	FOXO_TR	Glucose 17 mM + Glutamine 2.500000e-01 mM + EAA 1.000000e-01 X	2.21129	1.33963	1.38659	1.77748	1.30985	1.76944	1.75378	1.3893	1.13016	1.7301	0.883824	1.57397	2.01302	1.60031	1.64103	1.14435	1.41589	2.0014	1.1997	1.25784	1.85374	0.855484	1.51538	1.33099	1.59449	2.05944	2.0462	1.121	1.53237	1.8505	1.4673	1.52768	1.3663	1.33317	1.73869	1.33549	1.15398	1.47093	1.34062	1.00954	1.87404	1.75357	1.13956	1.64735	1.73872	1.69501	1.32161
Cell_0194	AMPKARt2	Glucose 17 mM + Glutamine 2.500000e-01 mM + EAA 1.000000e-01 X	0.498943	0.577448	0.537218	0.604339	0.534103	0.62403	0.570836	0.573587	0.629989	0.578053	0.59477	0.583765	0.667749	0.591666	0.639856	0.490468	0.645921	0.636316	0.663146	0.322088	0.735234	0.531423	0.614188	0.607829	0.564667	0.614596	0.339946	0.660285	0.602732	0.929254	0.545757	0.518149	0.643106	0.636972	0.633617	0.611814	0.621352	0.554643	0.533481	0.673755	0.493194	0.618497	0.67539	0.578793	0.674461	0.553552	0.472972
Cell_0195	TFEB_TR	Glucose 17 mM + Glutamine 2.500000e-01 mM + EAA 1.000000e-01 X	0.688007	1.5762	1.63115	1.03164	0.963885	1.37728	1.36765	1.18636	1.07389	1.29625	1.30538	1.50016	1.80242	1.67776	0.635971	1.43274	1.02836	1.15803	0.990043	1.95479	1.30713	0.663673	1.03049	1.47383	1.35381	0.822227	1.43545	1.75507	1.29806	1.12167	1.78805	1.21097	1.28549	3.12408	2.04061	1.32808	1.19071	1.26349	1.59948	1.52343	1.24193	1.15809	1.2179	1.06685	2.45681	1.57565	0.936675
Cell_0195	FOXO_TR	Glucose 17 mM + Glutamine 2.500000e-01 mM + EAA 1.000000e-01 X	2.12536	1.33751	1.41101	1.79365	1.29216	1.84268	1.70122	1.37638	1.13105	1.71421	0.918407	1.53799	1.92548	1.5345	1.58001	1.13204	1.40595	1.99584	1.15189	1.23519	1.81231	0.910884	1.43105	1.36546	1.66178	1.27558	2.0215	1.14022	1.54969	1.78453	1.45918	1.50551	1.38848	1.29556	1.86648	1.30061	1.10692	1.45419	1.40623	0.992142	1.8108	1.73581	1.14625	1.61075	1.69649	1.80641	1.30985
Cell_0195	AMPKARt2	Glucose 17 mM + Glutamine 2.500000e-01 mM + EAA 1.000000e-01 X	0.511964	0.579281	0.520363	0.619394	0.543406	0.633706	0.557497	0.589162	0.641541	0.587606	0.594162	0.581655	0.666214	0.581988	0.642632	0.49378	0.657611	0.626336	0.65733	0.318019	0.743137	0.539305	0.632844	0.606812	0.555764	0.426192	0.357468	0.657589	0.6204	0.947449	0.541586	0.527779	0.630123	0.648506	0.602794	0.626861	0.59505	0.562277	0.514369	0.666461	0.490027	0.621359	0.671398	0.571128	0.671234	0.556762	0.507064
Cell_0196	TFEB_TR	Glucose 17 mM + Glutamine 2.500000e-01 mM + EAA 1.000000e-01 X	0.701613	1.68648	1.65598	0.99366	0.944445	1.25034	1.38542	1.22013	1.22057	1.33741	1.31531	1.71671	1.56864	1.34055	0.610986	1.56514	0.973912	1.16747	0.963298	1.92123	1.59898	0.768425	1.31432	1.63596	1.26797	0.870876	1.38843	1.76158	1.18647	1.21104	1.70339	1.19322	1.24175	2.62419	1.84666	1.36163	1.30421	1.35805	2.32539	1.50785	1.35678	1.16188	1.41668	1.18404	2.41651	1.44816	0.87281
Cell_0196	FOXO_TR	Glucose 17 mM + Glutamine 2.500000e-01 mM + EAA 1.000000e-01 X	1.94241	1.32499	1.4385	1.71735	1.28866	1.84764	1.66134	1.34298	1.17008	1.65956	0.935551	1.49727	1.857	1.47877	1.5507	1.13485	1.36912	1.99397	1.11779	1.19802	1.74415	1.00378	1.36539	1.3924	1.67912	1.30462	1.96996	1.12648	1.55041	1.74057	1.39563	1.46715	1.39371	1.29651	1.95275	1.29209	1.12022	1.46633	1.33753	1.02913	1.70432	1.7639	1.15179	1.58667	1.74156	1.89292	1.351
Cell_0196	AMPKARt2	Glucose 17 mM + Glutamine 2.500000e-01 mM + EAA 1.000000e-01 X	0.517124	0.575259	0.524168	0.59906	0.549334	0.638945	0.55054	0.596229	0.644511	0.595397	0.61749	0.567675	0.662432	0.572485	0.634571	0.487466	0.648576	0.619608	0.665809	0.320956	0.747891	0.550455	0.642604	0.603379	0.549538	0.434074	0.370824	0.654416	0.636874	0.977548	0.551591	0.522534	0.650955	0.653032	0.574766	0.63832	0.573464	0.54567	0.501384	0.669718	0.493148	0.614748	0.679284	0.57334	0.669906	0.551428	0.498376
Cell_0197	TFEB_TR	Glucose 17 mM + Glutamine 2.500000e-01 mM + EAA 1.000000e-01 X	0.746981	1.74326	1.67796	0.957694	0.889685	1.31215	1.70849	1.27669	0.711807	1.26613	1.31553	1.58379	1.5825	1.6008	0.637484	1.35768	0.927503	1.15287	0.930093	1.93111	1.83138	0.833056	1.295	1.74656	1.22611	0.867319	1.38369	1.8681	1.33196	1.20992	1.63658	1.26929	1.13087	2.21314	1.79357	1.35232	1.22732	1.34732	2.11003	0.994631	1.11797	1.13676	1.09399	1.09406	2.49091	1.27631	0.865005
Cell_0197	FOXO_TR	Glucose 17 mM + Glutamine 2.500000e-01 mM + EAA 1.000000e-01 X	1.90942	1.35647	1.39727	1.64484	1.36467	1.80824	1.60771	1.34629	1.82234	1.57631	0.942763	1.50749	1.74961	1.46296	1.49821	1.18638	1.33415	2.02645	1.06009	1.20687	1.68192	1.05343	1.30954	1.40982	1.68211	1.30531	1.78803	1.10974	1.52563	1.61738	1.46671	1.44419	1.37952	1.30588	2.02472	1.34486	1.13495	1.45948	1.31804	2.09453	1.6062	1.76118	1.15321	1.53507	1.822	1.90633	1.39602
Cell_0197	AMPKARt2	Glucose 17 mM + Glutamine 2.500000e-01 mM + EAA 1.000000e-01 X	0.500784	0.597491	0.538591	0.573973	0.553312	0.639601	0.557255	0.595921	0.625855	0.605651	0.613999	0.573429	0.66187	0.577923	0.63048	0.490886	0.634652	0.623174	0.678516	0.311188	0.750454	0.550971	0.631469	0.602553	0.552438	0.431328	0.345642	0.650736	0.617443	1.01734	0.559165	0.521316	0.659227	0.656906	0.560592	0.630353	0.586287	0.526437	0.495088	0.457428	0.513158	0.616547	0.687569	0.574883	0.670742	0.545983	0.478897
Cell_0198	TFEB_TR	Glucose 17 mM + Glutamine 2.500000e-01 mM + EAA 1.000000e-01 X	0.782938	1.53773	1.6703	0.963822	0.947525	1.32886	1.84883	1.34797	0.667804	1.25414	1.29517	1.43177	1.72848	2.01959	0.683076	1.22449	0.822218	1.19093	0.930565	1.97151	1.55108	0.869431	1.27816	1.8125	1.25101	0.874166	1.49129	1.79981	1.57031	1.16297	1.60756	1.2228	1.08122	2.18389	1.50136	1.37127	1.04715	1.39207	1.30807	0.737431	0.951874	1.09645	0.944006	1.12489	2.58426	1.30423	0.969965
Cell_0198	FOXO_TR	Glucose 17 mM + Glutamine 2.500000e-01 mM + EAA 1.000000e-01 X	2.16635	1.37167	1.36707	1.63883	1.46881	1.80477	1.53141	1.34369	1.7937	1.54731	0.938823	1.58664	1.71652	1.44713	1.50042	1.25012	1.30962	2.11403	1.00164	1.2348	1.57389	1.08327	1.33637	1.4235	1.68005	1.28836	1.66956	1.09887	1.51111	1.56003	1.64271	1.46338	1.38596	1.31776	2.07744	1.32805	1.12528	1.42509	1.40709	2.11209	1.59803	1.77029	1.15592	1.45217	1.82325	1.89406	1.42515
Cell_0198	AMPKARt2	Glucose 17 mM + Glutamine 2.500000e-01 mM + EAA 1.000000e-01 X	0.485997	0.631927	0.536424	0.592653	0.553568	0.640189	0.553502	0.602443	0.636405	0.611215	0.580578	0.585198	0.670584	0.581203	0.630712	0.509091	0.630141	0.609537	0.689596	0.305132	0.7559	0.557525	0.637979	0.616132	0.55525	0.429532	0.330803	0.642407	0.60078	1.02176	0.557013	0.525646	0.65613	0.662256	0.559158	0.639957	0.597058	0.531737	0.491013	0.484136	0.508451	0.620682	0.684453	0.576054	0.666589	0.554233	0.48315
Cell_0199	TFEB_TR	Glucose 17 mM + Glutamine 2.500000e-01 mM + EAA 1.000000e-01 X	0.772567	1.50929	1.63342	0.991411	1.07556	1.31989	1.60753	1.40894	0.725137	1.34003	1.24169	1.33536	1.74685	1.89007	0.664304	1.41861	0.808563	1.31453	0.968117	1.99395	1.24934	0.916945	0.676586	1.84574	1.25031	0.869807	1.57913	1.60594	1.30529	1.13041	1.59034	1.18111	1.18768	2.50705	1.6454	1.56385	1.03304	1.52001	1.39926	0.919264	1.19997	1.12095	1.05325	1.0353	2.45798	1.54682	1.04033
Cell_0199	FOXO_TR	Glucose 17 mM + Glutamine 2.500000e-01 mM + EAA 1.000000e-01 X	2.51578	1.30786	1.37308	1.62039	1.45492	1.819	1.49844	1.35281	1.86048	1.52455	0.917986	1.6602	1.77591	1.43434	1.54294	1.27454	1.28596	2.19737	1.01038	1.2441	1.47962	1.11159	1.39517	1.46532	1.64739	1.26832	1.71395	1.09007	1.53631	1.69782	1.7417	1.53672	1.4132	1.34985	2.09939	1.30279	1.12509	1.39658	1.4258	2.03834	1.61225	1.80199	1.14826	1.40789	1.78118	1.884	1.47673
Cell_0199	AMPKARt2	Glucose 17 mM + Glutamine 2.500000e-01 mM + EAA 1.000000e-01 X	0.493575	0.636627	0.532515	0.604391	0.56528	0.631594	0.538072	0.598411	0.635613	0.605817	0.570885	0.584751	0.678757	0.580191	0.634356	0.522899	0.624416	0.58065	0.693724	0.30707	0.759266	0.582164	0.60912	0.613534	0.551984	0.446296	0.337729	0.633623	0.625041	0.985568	0.545572	0.517544	0.675961	0.644654	0.560579	0.664257	0.589106	0.549638	0.491118	0.498071	0.490239	0.611193	0.684035	0.591628	0.665335	0.564176	0.49814
Cell_0200	TFEB_TR	Glucose 17 mM + Glutamine 2.500000e-01 mM + EAA 1.000000e-01 X	0.830445	1.68385	1.57768	1.06631	1.01162	1.42286	1.44785	1.41475	0.756452	1.20519	1.20637	1.83779	1.68165	1.52581	0.643363	1.73796	0.946758	1.38608	1.00676	1.98197	1.39581	0.918264	0.877031	1.93152	1.17141	0.839368	1.58289	1.64336	1.09461	1.18779	1.53728	1.28781	1.28463	3.09606	2.69066	1.7207	1.19436	1.43989	2.308	1.00266	1.35587	1.16523	1.08657	1.01242	2.24533	1.84543	0.98076
Cell_0200	FOXO_TR	Glucose 17 mM + Glutamine 2.500000e-01 mM + EAA 1.000000e-01 X	2.61847	1.26219	1.36253	1.55331	1.37122	1.79034	1.51456	1.38774	1.87254	1.48023	0.889881	1.66817	1.75999	1.45604	1.50321	1.30404	1.28186	2.16053	1.03565	1.2443	1.42946	1.07644	1.41359	1.5011	1.64693	1.25566	1.64383	1.11635	1.60643	1.82313	1.76842	1.60023	1.43792	1.32901	2.17025	1.33004	1.13057	1.38047	1.35051	1.90897	1.62266	1.7778	1.12162	1.43611	1.74572	1.95052	1.54228
Cell_0200	AMPKARt2	Glucose 17 mM + Glutamine 2.500000e-01 mM + EAA 1.000000e-01 X	0.485471	0.624546	0.540967	0.576941	0.574487	0.630486	0.54127	0.58651	0.641505	0.600846	0.581409	0.582907	0.682142	0.592598	0.63824	0.529608	0.618221	0.569226	0.682547	0.298039	0.757355	0.592924	0.622381	0.595224	0.551469	0.465411	0.332726	0.624848	0.646132	0.96786	0.542287	0.49114	0.686595	0.631867	0.556163	0.666149	0.587126	0.554802	0.498125	0.507366	0.489204	0.599517	0.686864	0.591209	0.672043	0.573021	0.509315
Cell_0201	TFEB_TR	Glucose 17 mM + Glutamine 2.500000e-01 mM + EAA 1.000000e-01 X	1.0291	1.40915	1.58281	1.17742	1.00722	0.682789	1.53234	1.35434	0.726276	1.04527	1.27285	2.75045	1.6351	1.41363	0.667369	1.77431	1.02765	1.38139	1.08704	1.96181	1.43513	0.881865	1.01839	1.9871	1.13099	0.870409	1.60545	1.72598	1.30137	1.32579	1.44891	1.41648	1.2468	3.46819	2.59707	1.61411	1.01778	1.27478	2.46947	0.888538	1.28778	1.16697	1.05558	1.3065	2.2182	1.84162	0.963345
Cell_0201	FOXO_TR	Glucose 17 mM + Glutamine 2.500000e-01 mM + EAA 1.000000e-01 X	2.46637	1.28387	1.40902	1.51746	1.36069	1.17788	1.5062	1.37787	1.84677	1.47843	0.867177	1.65042	1.68862	1.50056	1.45256	1.33775	1.30232	2.02311	1.03557	1.24173	1.35799	1.01248	1.35322	1.45614	1.69637	1.24237	1.51951	1.16007	1.65366	1.82932	1.75113	1.57968	1.43682	1.26749	2.17843	1.31059	1.2566	1.34873	1.30267	1.81666	1.68843	1.72687	1.1033	1.44894	1.68373	2.06996	1.58136
Cell_0201	AMPKARt2	Glucose 17 mM + Glutamine 2.500000e-01 mM + EAA 1.000000e-01 X	0.455728	0.62296	0.539889	0.566209	0.559416	0.473627	0.552112	0.58754	0.658075	0.602457	0.587482	0.586521	0.685533	0.60489	0.622425	0.541198	0.622594	0.576571	0.674963	0.295483	0.748126	0.575249	0.608852	0.59989	0.5553	0.46068	0.351488	0.62666	0.638104	0.966661	0.54631	0.455802	0.666666	0.651373	0.55318	0.659991	0.567233	0.553487	0.510842	0.516108	0.490466	0.599623	0.685057	0.563158	0.67279	0.56869	0.515852
Cell_0202	TFEB_TR	Glucose 17 mM + Glutamine 2.500000e-01 mM + EAA 1.000000e-01 X	1.12528	1.26933	1.63098	1.22174	1.17961	0.675236	1.50459	1.33261	0.738285	1.22739	1.34019	2.41076	1.61414	1.36492	0.696459	1.51966	0.904091	1.49845	1.13501	1.97339	1.25767	0.889378	0.968653	1.93995	1.21937	0.918226	1.62963	1.60526	1.41089	1.25593	1.39944	1.45548	1.23555	3.18855	1.61243	1.52621	1.12412	1.34117	1.79191	1.01762	1.3387	1.17677	1.25401	1.28131	2.21633	1.6244	1.03215
Cell_0202	FOXO_TR	Glucose 17 mM + Glutamine 2.500000e-01 mM + EAA 1.000000e-01 X	2.33866	1.28957	1.51139	1.52314	1.37398	1.25554	1.45438	1.35388	1.92454	1.50616	0.858823	1.63847	1.6872	1.51459	1.47637	1.33983	1.29052	1.89925	1.04119	1.25087	1.29308	1.01536	1.31197	1.3832	1.69195	1.21304	1.57009	1.14529	1.68251	1.85961	1.6635	1.51757	1.44198	1.323	2.04697	1.2722	1.22306	1.29711	1.26174	1.81581	1.74008	1.71835	1.10518	1.39614	1.62517	2.09429	1.60284
Cell_0202	AMPKARt2	Glucose 17 mM + Glutamine 2.500000e-01 mM + EAA 1.000000e-01 X	0.452342	0.622822	0.534292	0.58343	0.556055	0.46551	0.542979	0.591162	0.664222	0.607887	0.592603	0.581727	0.687976	0.596407	0.593026	0.546437	0.631402	0.569359	0.686827	0.31697	0.740042	0.561252	0.601155	0.619047	0.550465	0.454585	0.406806	0.64412	0.641491	0.945259	0.530592	0.43619	0.668266	0.661075	0.557284	0.672974	0.570631	0.558975	0.517597	0.51948	0.49135	0.602558	0.690652	0.558924	0.661495	0.536363	0.517683
Cell_0203	TFEB_TR	Glucose 17 mM + Glutamine 2.500000e-01 mM + EAA 1.000000e-01 X	1.17934	1.90948	1.63932	1.22389	1.09802	0.667325	1.30795	1.39217	0.760002	1.32628	1.2878	1.27985	1.69704	1.11141	0.79027	1.46229	0.80767	1.73283	1.10188	1.03182	1.45248	0.913108	0.849135	1.95536	1.23608	0.874418	1.50895	1.65454	1.44737	1.14027	1.39213	1.40924	1.36287	2.6657	2.22262	1.6134	1.12212	1.45354	1.77804	1.17337	1.34832	1.21161	1.5584	0.935755	2.12249	1.73946	1.08123
Cell_0203	FOXO_TR	Glucose 17 mM + Glutamine 2.500000e-01 mM + EAA 1.000000e-01 X	2.26739	1.29825	1.51631	1.49561	1.33906	1.22077	1.41323	1.40706	1.97271	1.49352	0.853751	1.61637	1.68866	1.48547	1.51984	1.37464	1.25814	1.78044	1.04166	1.58435	1.26575	1.03991	1.31716	1.36991	1.64573	1.19673	1.53108	1.10472	1.77788	1.89913	1.6286	1.4866	1.48207	1.45864	1.98693	1.29707	1.17301	1.29285	1.2263	1.86246	1.72568	1.69093	1.11669	1.35416	1.62921	2.07319	1.63029
Cell_0203	AMPKARt2	Glucose 17 mM + Glutamine 2.500000e-01 mM + EAA 1.000000e-01 X	0.461811	0.62452	0.541894	0.590696	0.574166	0.456657	0.550346	0.591922	0.652228	0.612889	0.59298	0.573972	0.691718	0.585156	0.581535	0.532123	0.629633	0.545724	0.694097	0.39924	0.737023	0.566849	0.618555	0.624691	0.542557	0.473795	0.438257	0.645534	0.644645	0.935426	0.520918	0.441048	0.699348	0.653733	0.548886	0.68016	0.571384	0.55592	0.512677	0.51649	0.512773	0.599132	0.698029	0.582609	0.648525	0.510072	0.515306
Cell_0204	TFEB_TR	Glucose 17 mM + Glutamine 2.500000e-01 mM + EAA 1.000000e-01 X	1.54349	2.11159	1.67087	1.3045	0.855959	0.641197	1.24434	1.41864	0.744989	1.09455	1.18511	1.45649	1.7476	1.02085	0.967146	1.62723	0.948098	1.81888	1.10223	0.976479	1.74172	0.890287	0.891823	1.94691	1.14774	0.82457	1.3335	1.86916	1.55421	1.17726	1.39242	1.45728	1.4774	2.39971	2.93271	1.62219	1.117	1.41855	2.31164	1.04821	1.21535	1.20337	1.52469	1.05294	2.10531	2.05769	1.07804
Cell_0204	FOXO_TR	Glucose 17 mM + Glutamine 2.500000e-01 mM + EAA 1.000000e-01 X	2.12471	1.38152	1.49244	1.4638	1.34187	1.13314	1.37822	1.47065	1.89847	1.45554	0.844963	1.62528	1.64061	1.47022	1.55795	1.44433	1.28136	1.62952	1.01787	1.5888	1.22062	1.01125	1.29147	1.36469	1.64701	1.20716	1.29587	1.12213	1.94239	1.86772	1.70205	1.46252	1.52277	1.53755	2.01783	1.31264	1.15709	1.3574	1.30547	1.86855	1.72684	1.61885	1.14467	1.33956	1.66691	2.10718	1.65171
Cell_0204	AMPKARt2	Glucose 17 mM + Glutamine 2.500000e-01 mM + EAA 1.000000e-01 X	0.45001	0.637927	0.547666	0.586903	0.567195	0.448658	0.602413	0.602029	0.639024	0.611223	0.593808	0.588239	0.695928	0.588961	0.583722	0.518005	0.618098	0.537245	0.685413	0.388588	0.729325	0.573086	0.623675	0.62805	0.543887	0.491916	0.43468	0.621547	0.609155	0.949193	0.545395	0.431561	0.705018	0.667219	0.522667	0.667679	0.574919	0.543359	0.513314	0.509135	0.541438	0.596212	0.68334	0.588983	0.644357	0.508671	0.518841
Cell_0205	TFEB_TR	Glucose 17 mM + Glutamine 2.500000e-01 mM + EAA 1.000000e-01 X	1.76771	1.49441	0.549464	1.40095	0.940842	0.63283	1.41356	1.40736	0.748062	1.02173	1.13844	2.10166	1.52928	1.22612	1.11565	1.59676	1.03618	1.7393	1.10362	0.977454	1.63435	0.859364	0.98991	1.73495	1.22073	0.86745	1.31177	1.73815	1.41666	1.07849	1.40945	1.6751	1.45352	0.639207	2.07426	1.54417	1.10672	1.40474	2.09586	0.92711	1.28682	1.14301	1.35729	1.27745	2.1206	2.04788	1.01132
Cell_0205	FOXO_TR	Glucose 17 mM + Glutamine 2.500000e-01 mM + EAA 1.000000e-01 X	2.00801	1.46421	1.32503	1.50856	1.41031	1.09674	1.31331	1.47097	1.8706	1.44759	0.858829	1.69582	1.63256	1.48296	1.56535	1.4821	1.29274	1.52574	0.997128	1.59208	1.18512	0.986088	1.24842	1.32359	1.63491	1.21742	1.18903	1.15463	2.09907	1.85683	1.7095	1.41299	1.55726	1.52268	1.90996	1.29138	1.16951	1.39477	1.4079	1.84178	1.74092	1.57388	1.17026	1.28743	1.68908	2.07374	1.64709
Cell_0205	AMPKARt2	Glucose 17 mM + Glutamine 2.500000e-01 mM + EAA 1.000000e-01 X	0.445601	0.646994	0.614881	0.581086	0.551302	0.446426	0.640391	0.612819	0.638909	0.615567	0.604744	0.605448	0.693772	0.595302	0.578713	0.527339	0.621162	0.543181	0.682098	0.389106	0.727642	0.573475	0.6075	0.635551	0.541872	0.487398	0.43125	0.615454	0.581334	0.94268	0.548374	0.400808	0.679462	0.642149	0.523955	0.66893	0.581361	0.549434	0.526439	0.504368	0.545662	0.605887	0.652083	0.586111	0.650271	0.504316	0.539988
Cell_0206	TFEB_TR	Glucose 17 mM + Glutamine 2.500000e-01 mM + EAA 1.000000e-01 X	1.4055	1.33237	0.56059	1.39984	1.13804	0.645359	1.55773	1.46315	0.750543	1.17005	1.15603	1.54007	1.40622	1.17785	1.25539	1.51909	0.903136	1.70717	1.06525	0.85306	1.46855	0.862821	1.01383	1.59081	1.32926	0.89978	1.38374	1.39265	1.28599	1.00189	1.42233	1.78797	1.35679	0.621003	1.9951	1.51005	1.02189	1.46906	1.68166	0.994394	1.48617	1.09654	1.29627	1.11626	2.04491	1.82441	0.977977
Cell_0206	FOXO_TR	Glucose 17 mM + Glutamine 2.500000e-01 mM + EAA 1.000000e-01 X	2.019	1.47855	1.31909	1.54742	1.42931	1.06852	1.27659	1.47731	1.89419	1.45886	0.890333	1.73494	1.67213	1.49169	1.52257	1.52613	1.2337	1.50495	0.980563	1.56669	1.2142	1.00971	1.24232	1.31177	1.57197	1.24374	1.21072	1.13379	2.15025	1.9177	1.6609	1.36704	1.58441	1.4885	1.72233	1.32284	1.14822	1.36663	1.36773	1.8058	1.7077	1.53199	1.16679	1.23622	1.68467	1.93794	1.59672
Cell_0206	AMPKARt2	Glucose 17 mM + Glutamine 2.500000e-01 mM + EAA 1.000000e-01 X	0.45783	0.642274	0.626606	0.574069	0.568131	0.461395	0.633615	0.610866	0.644368	0.634811	0.611551	0.582612	0.695926	0.594684	0.571691	0.549923	0.648101	0.536341	0.687279	0.398273	0.74105	0.576006	0.613134	0.634669	0.534457	0.466912	0.433885	0.641565	0.599395	0.917415	0.518942	0.398498	0.662762	0.625517	0.572969	0.681987	0.578256	0.571374	0.529476	0.509143	0.535133	0.621365	0.623484	0.597546	0.655606	0.497784	0.554263
Cell_0207	TFEB_TR	Glucose 17 mM + Glutamine 2.500000e-01 mM + EAA 1.000000e-01 X	1.19578	1.61625	0.551462	1.35681	1.07288	0.613511	1.43958	1.51358	0.732079	1.17682	1.17269	0.969749	1.75931	1.06842	1.43865	1.7048	0.656602	1.7524	1.119	0.810117	1.52312	0.870969	1.07733	1.66362	1.21168	0.868923	1.38018	1.32227	1.47123	1.24381	1.43044	1.76096	1.30359	0.58542	2.86977	1.44086	1.02556	1.55216	2.04263	1.05451	1.46566	1.09102	1.16511	1.15868	1.96743	1.7767	1.02617
Cell_0207	FOXO_TR	Glucose 17 mM + Glutamine 2.500000e-01 mM + EAA 1.000000e-01 X	2.06369	1.48105	1.31765	1.48008	1.36733	1.00222	1.29125	1.5023	1.84418	1.45321	0.902653	1.68603	1.69855	1.52017	1.48397	1.56986	1.16806	1.49285	0.955918	1.49056	1.24554	1.02335	1.26853	1.33163	1.55798	1.29037	1.16836	1.09167	2.06342	2.00872	1.73363	1.33068	1.57162	1.46386	1.68577	1.37898	1.11281	1.33305	1.31948	1.73101	1.67611	1.44585	1.16274	1.28248	1.65737	1.84891	1.50675
Cell_0207	AMPKARt2	Glucose 17 mM + Glutamine 2.500000e-01 mM + EAA 1.000000e-01 X	0.452491	0.638175	0.625767	0.575241	0.586657	0.48528	0.632203	0.604409	0.649319	0.642699	0.609648	0.544354	0.71015	0.595526	0.570019	0.555769	0.537821	0.518476	0.688548	0.407256	0.745954	0.575272	0.6396	0.633979	0.536678	0.426131	0.435149	0.660638	0.61464	0.907416	0.52587	0.421515	0.665343	0.629121	0.607937	0.676333	0.56815	0.582941	0.519788	0.524548	0.540076	0.621482	0.604762	0.615226	0.653587	0.498661	0.530365
Cell_0208	TFEB_TR	Glucose 17 mM + Glutamine 2.500000e-01 mM + EAA 1.000000e-01 X	1.48076	1.72291	0.540316	1.33308	0.980348	0.577607	1.32957	1.4687	0.761069	1.10271	1.17302	1.52392	2.06468	1.50197	1.52523	1.82461	0.657128	1.78865	1.18815	1.00573	1.64992	0.863634	1.12175	1.67224	1.06993	0.911254	1.31828	1.47784	1.54106	1.44494	1.46402	1.77812	1.33587	0.586438	2.59127	1.33718	1.12283	1.60769	2.34789	1.01955	1.3221	1.08784	1.26582	1.37276	1.93426	1.92432	1.02079
Cell_0208	FOXO_TR	Glucose 17 mM + Glutamine 2.500000e-01 mM + EAA 1.000000e-01 X	2.05931	1.49402	1.35852	1.40461	1.34176	0.978238	1.2643	1.49544	1.80664	1.4471	0.901895	1.63464	1.71698	1.53897	1.45853	1.53623	1.1761	1.45112	0.963744	1.42721	1.23014	1.00541	1.28579	1.31506	1.59617	1.29844	1.13813	1.08519	1.91752	2.11208	1.79938	1.29932	1.55676	1.50356	1.70392	1.37431	1.11677	1.32949	1.42054	1.70832	1.68355	1.39452	1.16832	1.397	1.63063	1.82566	1.46327
Cell_0208	AMPKARt2	Glucose 17 mM + Glutamine 2.500000e-01 mM + EAA 1.000000e-01 X	0.43258	0.640055	0.635681	0.581729	0.584708	0.485938	0.642392	0.609891	0.649246	0.635767	0.607912	0.545187	0.721779	0.60098	0.566299	0.541171	0.553315	0.516052	0.684211	0.406068	0.735859	0.568106	0.64113	0.642722	0.539113	0.379764	0.437317	0.650422	0.603067	0.915679	0.548286	0.432682	0.668228	0.645083	0.592358	0.677167	0.573498	0.582621	0.526625	0.544464	0.556012	0.609159	0.600135	0.633446	0.651227	0.49506	0.506089
Cell_0209	TFEB_TR	Glucose 17 mM + Glutamine 2.500000e-01 mM + EAA 1.000000e-01 X	1.62971	1.92856	0.55081	1.3289	0.989228	0.608155	1.49118	1.44426	0.818945	1.10632	1.18909	1.97863	1.88489	1.80685	1.52552	1.62899	0.649489	1.76947	1.12836	1.10162	1.73495	0.85307	1.08901	1.57116	1.04352	1.04435	1.31759	1.50578	1.44909	1.29737	0.500771	1.7218	1.383	0.613084	2.08714	1.26489	1.03799	1.48667	2.00499	1.02939	1.24811	1.07601	1.55799	1.23773	1.9249	2.07275	1.02483
Cell_0209	FOXO_TR	Glucose 17 mM + Glutamine 2.500000e-01 mM + EAA 1.000000e-01 X	2.02369	1.49111	1.44214	1.39195	1.40184	0.999127	1.1963	1.51016	1.84067	1.45754	0.900863	1.63204	1.7337	1.45612	1.43132	1.48256	1.16921	1.39348	1.00011	1.49223	1.21296	0.996882	1.28278	1.29383	1.61747	1.25679	1.17473	1.1051	1.79749	2.17405	1.53237	1.31859	1.58562	1.57721	1.6022	1.39403	1.13955	1.35662	1.54154	1.83962	1.68126	1.4213	1.14516	1.46044	1.62556	1.79261	1.51787
Cell_0209	AMPKARt2	Glucose 17 mM + Glutamine 2.500000e-01 mM + EAA 1.000000e-01 X	0.423103	0.639488	0.651804	0.585487	0.577369	0.460214	0.633162	0.625192	0.622579	0.646059	0.606616	0.566101	0.731007	0.603351	0.555063	0.534971	0.57233	0.54225	0.677909	0.39157	0.731158	0.561623	0.625688	0.649224	0.535951	0.363055	0.442986	0.635114	0.603973	0.924913	0.520959	0.441041	0.669521	0.659471	0.576051	0.700217	0.585234	0.579	0.548859	0.552558	0.568392	0.603673	0.600794	0.640246	0.651681	0.494782	0.526335
Cell_0210	TFEB_TR	Glucose 17 mM + Glutamine 2.500000e-01 mM + EAA 1.000000e-01 X	1.68607	1.97026	0.567845	1.35325	0.928959	0.64068	1.52692	1.47822	0.826272	1.08128	1.16733	1.67986	1.60731	1.45848	1.66553	1.50986	0.650423	1.67607	1.06697	1.01823	1.82788	0.829971	1.21049	1.58843	1.02453	1.09189	1.42807	1.38639	1.50422	0.999154	0.519439	1.68603	1.37151	0.611035	2.31821	1.22686	0.919419	1.30209	1.93438	1.12928	1.24971	1.10698	1.39177	1.10836	1.98842	2.2858	1.11634
Cell_0210	FOXO_TR	Glucose 17 mM + Glutamine 2.500000e-01 mM + EAA 1.000000e-01 X	2.04373	1.48416	1.51675	1.36695	1.43966	0.990482	1.17828	1.55198	1.82245	1.44718	0.892723	1.63594	1.73252	1.37868	1.42125	1.4791	1.18168	1.3367	0.981065	1.62934	1.22215	0.990806	1.31544	1.32425	1.64277	1.21748	1.21472	1.09602	1.75299	2.14934	1.51135	1.38874	1.61176	1.56237	1.55633	1.50343	1.14721	1.37158	1.54347	1.96903	1.68288	1.46201	1.09631	1.44041	1.63402	1.76575	1.57366
Cell_0210	AMPKARt2	Glucose 17 mM + Glutamine 2.500000e-01 mM + EAA 1.000000e-01 X	0.418203	0.633129	0.648602	0.593341	0.558302	0.437172	0.630534	0.627159	0.580654	0.664422	0.606742	0.558352	0.742761	0.60302	0.54467	0.541686	0.577853	0.580534	0.680875	0.383066	0.732572	0.559915	0.630083	0.648391	0.545952	0.366219	0.44378	0.632274	0.626913	0.930099	0.506299	0.454421	0.681101	0.660337	0.587511	0.697586	0.575502	0.577113	0.551271	0.54601	0.577588	0.608406	0.59132	0.633336	0.651279	0.496121	0.549065
Cell_0211	TFEB_TR	Glucose 17 mM + Glutamine 2.500000e-01 mM + EAA 1.000000e-01 X	1.86289	1.64665	0.560983	1.34851	0.984287	0.635674	1.29147	1.44751	0.822532	0.987646	1.10945	1.74491	1.45974	0.894892	1.81784	1.65227	0.654232	1.60246	1.0404	0.966107	1.88378	0.794067	1.37487	1.67708	1.09132	0.989894	1.59118	1.36933	1.53508	0.954659	0.533569	1.84734	1.32499	0.602384	2.18807	1.24789	1.09572	1.35227	2.44261	1.24787	1.2618	1.16398	1.15195	1.20622	1.37028	2.72324	1.08589
Cell_0211	FOXO_TR	Glucose 17 mM + Glutamine 2.500000e-01 mM + EAA 1.000000e-01 X	2.17345	1.48843	1.52102	1.31679	1.41417	0.991145	1.19277	1.50885	1.75678	1.40872	0.881386	1.6187	1.71956	1.34023	1.40956	1.487	1.19099	1.31533	0.920006	1.6526	1.22001	0.971087	1.39147	1.33336	1.67434	1.21521	1.26992	1.07935	1.74984	2.07657	1.52227	1.43872	1.62164	1.46287	1.67728	1.58317	1.15583	1.3613	1.48019	1.93389	1.74788	1.47993	1.05882	1.4216	2.25118	1.78891	1.56159
Cell_0211	AMPKARt2	Glucose 17 mM + Glutamine 2.500000e-01 mM + EAA 1.000000e-01 X	0.406236	0.629126	0.640821	0.606822	0.552927	0.429486	0.651409	0.618771	0.563554	0.657724	0.606567	0.539452	0.738365	0.596188	0.54938	0.538936	0.589852	0.600698	0.691239	0.389509	0.730914	0.567261	0.6339	0.64702	0.55881	0.358731	0.433392	0.627835	0.633467	0.94875	0.51608	0.466663	0.686443	0.654566	0.598027	0.674904	0.56548	0.582277	0.536247	0.541074	0.578698	0.619469	0.579577	0.640667	0.515794	0.479606	0.536809
Cell_0212	TFEB_TR	Glucose 17 mM + Glutamine 2.500000e-01 mM + EAA 1.000000e-01 X	1.66661	1.71809	0.540081	1.29904	1.18428	0.624765	1.25662	1.37318	0.91762	0.920938	1.12389	2.22094	1.44132	0.95696	1.7266	1.69139	0.647913	1.5818	0.969597	0.92806	1.61561	0.782962	1.16856	1.60656	1.22773	0.915418	1.70401	1.40352	1.57415	1.18082	0.551249	1.80188	1.26375	0.61217	1.88526	1.19523	1.27666	1.47926	2.41223	1.49725	1.16089	1.14033	1.42206	1.22576	1.30797	2.90251	0.969813
Cell_0212	FOXO_TR	Glucose 17 mM + Glutamine 2.500000e-01 mM + EAA 1.000000e-01 X	2.25539	1.49834	1.47338	1.27373	1.42209	1.01162	1.2066	1.41566	1.74839	1.39766	0.862432	1.58621	1.69891	1.34741	1.40314	1.48325	1.16717	1.32147	0.908038	1.5935	1.17114	0.976773	1.42861	1.29031	1.67508	1.24024	1.34344	1.14133	1.66752	2.00312	1.55138	1.45919	1.64902	1.40222	1.72015	1.57823	1.18784	1.39388	1.48041	1.84077	1.83093	1.44605	1.03347	1.4597	2.22988	1.82877	1.55024
Cell_0212	AMPKARt2	Glucose 17 mM + Glutamine 2.500000e-01 mM + EAA 1.000000e-01 X	0.396225	0.63393	0.646579	0.61611	0.594536	0.4241	0.661183	0.626973	0.554044	0.644717	0.608015	0.55021	0.724749	0.576125	0.568004	0.532304	0.613892	0.598911	0.684359	0.38864	0.731427	0.573872	0.613075	0.649274	0.553028	0.345832	0.425382	0.630082	0.612191	0.972213	0.5345	0.480563	0.672377	0.665768	0.594256	0.68694	0.573252	0.590532	0.538771	0.53335	0.577999	0.624187	0.579442	0.655352	0.527063	0.464754	0.53096
Cell_0213	TFEB_TR	Glucose 17 mM + Glutamine 2.500000e-01 mM + EAA 1.000000e-01 X	1.27793	1.9619	0.538066	1.30938	1.08797	0.618675	1.41606	1.35151	1.11303	0.9158	1.15185	2.02133	1.74572	0.983715	1.63923	1.5203	0.644034	1.44238	0.972013	0.888238	1.29474	0.799488	0.789383	1.5385	1.18187	1.02431	1.7451	1.27199	1.67708	1.19147	0.562133	1.5106	1.21617	0.618569	2.02637	0.996634	1.22317	1.44917	1.52299	1.82414	1.09915	1.0519	1.58784	1.16771	1.57689	2.49495	1.00888
Cell_0213	FOXO_TR	Glucose 17 mM + Glutamine 2.500000e-01 mM + EAA 1.000000e-01 X	2.14064	1.48261	1.4835	1.23831	1.4556	0.994463	1.27161	1.40744	1.73536	1.4041	0.855687	1.57445	1.68004	1.38008	1.44496	1.45531	1.15212	1.28376	0.926412	1.60935	1.13024	1.01022	1.41184	1.3266	1.67	1.2456	1.39833	1.64688	1.55219	1.96709	1.57057	1.48749	1.66039	1.38497	1.62409	1.51219	1.23854	1.42814	1.5432	1.79258	1.86151	1.35734	1.00261	1.49928	2.24071	1.82818	1.56428
Cell_0213	AMPKARt2	Glucose 17 mM + Glutamine 2.500000e-01 mM + EAA 1.000000e-01 X	0.400201	0.638472	0.649357	0.615646	0.624495	0.399339	0.656472	0.635175	0.522047	0.656094	0.624587	0.568315	0.728908	0.579261	0.581695	0.53538	0.611	0.602147	0.668506	0.390319	0.738005	0.564672	0.60304	0.652426	0.555149	0.339383	0.422558	0.698313	0.599043	0.971901	0.535346	0.480669	0.666136	0.67888	0.585702	0.706641	0.563291	0.595289	0.545787	0.512222	0.583179	0.613364	0.584707	0.648373	0.523651	0.472164	0.544848
Cell_0214	TFEB_TR	Glucose 17 mM + Glutamine 2.500000e-01 mM + EAA 1.000000e-01 X	1.37177	1.84604	0.545778	1.3329	0.866616	0.686269	1.43672	1.3368	1.25178	0.934745	1.08117	1.58246	2.01101	1.00467	1.7646	1.40446	0.644079	1.25067	1.04513	0.993669	1.43274	0.799833	0.750331	1.80665	1.05313	1.16169	1.80985	1.12308	1.49372	1.08294	0.562335	1.51941	1.24415	0.620434	2.04311	0.966943	1.21279	1.38803	1.10149	1.75935	1.23468	1.02976	1.28627	1.15688	1.39419	2.29965	1.07777
Cell_0214	FOXO_TR	Glucose 17 mM + Glutamine 2.500000e-01 mM + EAA 1.000000e-01 X	2.0049	1.42697	1.53316	1.22661	1.44688	1.00933	1.3619	1.43269	1.65941	1.34141	0.896015	1.60117	1.69025	1.40846	1.5062	1.40037	1.15388	1.21496	0.92419	1.69031	1.16076	1.01179	1.38793	1.44719	1.68221	1.21563	1.43658	1.61966	1.55047	1.99711	1.61457	1.50024	1.6593	1.34361	1.58003	1.3931	1.27611	1.39709	1.5084	1.72472	1.86721	1.33112	0.969039	1.48129	2.22743	1.84375	1.55526
Cell_0214	AMPKARt2	Glucose 17 mM + Glutamine 2.500000e-01 mM + EAA 1.000000e-01 X	0.422607	0.63594	0.644683	0.610116	0.600916	0.354294	0.66155	0.620282	0.495706	0.666895	0.648405	0.559231	0.732611	0.593484	0.579882	0.539381	0.595767	0.618031	0.673476	0.423737	0.74657	0.559415	0.617249	0.652144	0.578126	0.340373	0.410281	0.703875	0.608746	0.977795	0.525608	0.466941	0.668764	0.670299	0.579408	0.689505	0.534132	0.595137	0.524561	0.496605	0.585874	0.617385	0.591126	0.637672	0.531252	0.48422	0.540475
Cell_0215	TFEB_TR	Glucose 17 mM + Glutamine 2.500000e-01 mM + EAA 1.000000e-01 X	1.6299	2.0648	0.540389	1.2667	1.00722	0.825371	1.39768	1.29193	1.26081	0.936503	0.998349	1.68069	1.76031	0.988655	1.85326	1.42479	0.639324	1.29595	1.00008	1.15606	1.50238	0.777802	0.948704	2.12214	1.16232	1.15613	1.95589	1.04558	1.37048	1.30072	0.569741	1.68807	1.26527	0.639163	2.03814	1.18039	1.18775	1.26528	1.584	1.40588	1.19344	0.662099	1.04229	1.22742	0.95993	2.63686	1.03609
Cell_0215	FOXO_TR	Glucose 17 mM + Glutamine 2.500000e-01 mM + EAA 1.000000e-01 X	2.00611	1.40543	1.50542	1.21422	1.48569	1.08457	1.37851	1.38734	1.60659	1.2361	1.65552	1.60396	1.71556	1.4074	1.52463	1.37275	1.13791	1.19611	0.916571	1.78548	1.1835	0.981193	1.35626	1.47933	1.71469	1.19213	1.47607	1.58756	1.57433	2.06317	1.68177	1.47012	1.70946	1.32816	1.58959	1.39073	1.25881	1.39401	1.42387	1.63898	1.88593	1.81811	0.95096	1.42954	2.20375	1.92271	1.5537
Cell_0215	AMPKARt2	Glucose 17 mM + Glutamine 2.500000e-01 mM + EAA 1.000000e-01 X	0.454803	0.634147	0.650118	0.612356	0.585568	0.324133	0.669193	0.614038	0.489021	0.652554	0.697572	0.554033	0.720004	0.600551	0.575076	0.542917	0.600514	0.61987	0.682478	0.457188	0.755988	0.574177	0.613256	0.654348	0.584701	0.35445	0.400168	0.708009	0.623762	1.00661	0.527159	0.470622	0.651723	0.663878	0.576915	0.670508	0.525341	0.597045	0.509321	0.496585	0.602213	0.647608	0.605221	0.637668	0.550047	0.489717	0.528052
Cell_0216	TFEB_TR	Glucose 17 mM + Glutamine 2.500000e-01 mM + EAA 1.000000e-01 X	1.56698	2.30796	0.542022	1.26051	1.14719	0.866831	1.37843	1.25697	1.31285	0.899817	1.11414	1.77775	1.5472	0.927928	1.81224	1.53664	0.636515	1.43227	0.923377	1.0588	1.30787	0.767846	0.992353	2.06191	1.34051	1.15502	2.07514	0.884113	1.74173	1.43158	0.584981	1.60793	1.21513	0.674335	2.30384	1.26223	1.01192	1.08974	1.81298	1.40989	0.974454	0.830403	1.00336	1.33962	1.08038	2.71256	1.05471
Cell_0216	FOXO_TR	Glucose 17 mM + Glutamine 2.500000e-01 mM + EAA 1.000000e-01 X	1.98769	1.44636	1.48717	1.18344	1.58945	1.0911	1.33697	1.3366	1.57019	1.23408	1.80273	1.56282	1.70698	1.39345	1.47565	1.35959	1.11924	1.17905	0.899402	1.85789	1.14789	0.980892	1.31341	1.42563	1.77806	1.19415	1.52452	1.59198	1.52022	2.11819	1.70032	1.43385	1.72842	1.39154	1.59717	1.59127	1.19495	1.41929	1.5117	1.61531	1.89553	1.80918	0.965039	1.38055	2.20598	1.92699	1.60958
Cell_0216	AMPKARt2	Glucose 17 mM + Glutamine 2.500000e-01 mM + EAA 1.000000e-01 X	0.474528	0.638192	0.652811	0.620871	0.601461	0.326375	0.664652	0.627567	0.478499	0.642047	0.71707	0.572271	0.718507	0.601056	0.579664	0.548004	0.599243	0.601145	0.674983	0.45308	0.763727	0.581878	0.587285	0.662241	0.578086	0.372141	0.407896	0.709399	0.644746	1.00152	0.534114	0.487576	0.631674	0.668354	0.572177	0.674964	0.539004	0.611151	0.529142	0.494494	0.624856	0.639062	0.61834	0.632123	0.553971	0.487725	0.534087
Cell_0217	TFEB_TR	Glucose 17 mM + Glutamine 2.500000e-01 mM + EAA 1.000000e-01 X	1.41706	1.73267	0.558262	1.36739	1.01629	0.794387	1.323	1.2404	1.47444	0.867567	1.15171	1.66521	1.77443	0.934212	1.73404	1.6609	0.643368	1.37621	0.99207	0.809785	1.55024	0.767057	0.906699	1.91181	0.933137	1.19761	2.06194	0.922545	1.94558	1.16289	0.60235	1.50185	1.22659	0.690199	2.24823	1.13757	1.04445	1.2327	1.5674	1.61996	1.08886	0.790795	1.01042	1.33196	1.30214	2.50207	1.15671
Cell_0217	FOXO_TR	Glucose 17 mM + Glutamine 2.500000e-01 mM + EAA 1.000000e-01 X	1.85855	1.45281	1.58197	1.1809	1.57612	1.01881	1.31486	1.36232	1.49095	1.34902	1.8364	1.5411	1.66704	1.37969	1.40147	1.32006	1.13264	1.10606	0.882826	1.82088	1.16894	0.996175	1.27124	1.40688	1.01525	1.20434	1.54372	1.61438	1.50808	2.17724	1.70622	1.41508	1.6069	1.45753	1.61158	1.71579	1.14283	1.38693	1.63944	1.62096	1.87976	1.76283	0.99238	1.35043	2.20391	1.8242	1.67838
Cell_0217	AMPKARt2	Glucose 17 mM + Glutamine 2.500000e-01 mM + EAA 1.000000e-01 X	0.478344	0.644295	0.629208	0.617663	0.601805	0.3307	0.65701	0.630524	0.461501	0.651666	0.724509	0.573134	0.727079	0.597829	0.587679	0.548929	0.590884	0.594384	0.673031	0.42475	0.761849	0.569388	0.577712	0.663853	0.533929	0.376217	0.416035	0.711818	0.65969	0.966033	0.528072	0.491697	0.633179	0.661867	0.571417	0.683703	0.558728	0.621522	0.536474	0.48426	0.60688	0.639124	0.616624	0.630978	0.549142	0.480882	0.536605
Cell_0218	TFEB_TR	Glucose 17 mM + Glutamine 2.500000e-01 mM + EAA 1.000000e-01 X	1.34996	1.5256	0.555738	1.3779	1.07147	0.752021	1.30628	1.27686	1.53909	0.912709	1.11028	1.57712	1.82786	1.01485	1.57168	1.58219	0.665272	1.34069	1.08492	0.80527	1.77634	0.740418	0.932991	1.93379	0.878091	1.14393	2.02004	1.0237	1.66312	0.984692	0.61913	1.5472	1.23365	0.662811	2.24589	1.01519	1.25468	1.48397	1.55199	1.61183	1.25135	0.610312	1.27431	1.20061	1.26549	2.65606	1.14197
Cell_0218	FOXO_TR	Glucose 17 mM + Glutamine 2.500000e-01 mM + EAA 1.000000e-01 X	1.73333	1.40741	1.63599	1.19649	1.45269	0.964777	1.29585	1.44808	1.44266	1.43504	1.83481	1.53794	1.63765	1.37195	1.37744	1.32151	1.17973	1.09723	0.911554	1.71383	1.25573	0.957416	1.22831	1.37782	1.00979	1.20496	1.50732	1.57153	1.56636	2.26024	1.74835	1.38365	1.45476	1.47145	1.60353	1.65171	1.13214	1.3685	1.58449	1.60393	1.88314	1.75351	0.986628	1.36708	2.21808	1.79823	1.69727
Cell_0218	AMPKARt2	Glucose 17 mM + Glutamine 2.500000e-01 mM + EAA 1.000000e-01 X	0.481679	0.644649	0.61075	0.611059	0.593403	0.32261	0.656149	0.63387	0.448719	0.657019	0.707737	0.559319	0.722314	0.596008	0.595618	0.551571	0.598757	0.6099	0.682545	0.388804	0.752968	0.560458	0.59054	0.654663	0.533987	0.375667	0.416921	0.713982	0.64141	0.960652	0.522089	0.486894	0.639824	0.654416	0.588066	0.697283	0.567896	0.61259	0.525906	0.476604	0.585379	0.642322	0.607731	0.647353	0.54997	0.484682	0.530107
Cell_0219	TFEB_TR	Glucose 17 mM + Glutamine 2.500000e-01 mM + EAA 1.000000e-01 X	1.30703	2.29085	0.532431	1.33855	1.23697	0.738032	1.32698	0.554703	1.48489	0.990647	1.08935	1.34768	1.59601	1.01537	1.4219	1.38833	0.69301	1.50094	1.08597	0.958553	1.43872	0.71304	1.14471	1.90368	0.842779	1.11941	2.05897	0.798373	1.42219	1.07196	0.626889	1.59345	1.08604	0.635242	2.89129	0.966249	1.27714	1.27397	0.486923	1.64902	1.04648	0.56292	1.63949	1.06918	1.33288	2.92572	1.01419
Cell_0219	FOXO_TR	Glucose 17 mM + Glutamine 2.500000e-01 mM + EAA 1.000000e-01 X	1.63808	1.39281	1.56042	1.21222	1.42042	0.936795	1.24236	1.19718	1.44054	1.44889	1.81944	1.51999	1.62557	1.39204	1.3985	1.36207	1.22096	1.20441	0.945503	1.63609	1.29731	0.921341	1.19306	1.29003	0.995969	1.1958	1.49765	1.48412	1.57054	2.28007	1.75471	1.33693	1.40163	1.46832	1.68549	1.65425	1.15046	1.40818	1.49958	1.6056	1.92587	1.78811	0.95575	1.40514	2.2443	1.84515	1.66598
Cell_0219	AMPKARt2	Glucose 17 mM + Glutamine 2.500000e-01 mM + EAA 1.000000e-01 X	0.483931	0.640047	0.630616	0.622399	0.606801	0.327015	0.653618	0.565738	0.446998	0.653178	0.700539	0.56625	0.720699	0.600258	0.607686	0.553789	0.598604	0.618529	0.683713	0.368348	0.750645	0.567853	0.607316	0.639939	0.543947	0.381245	0.420112	0.70633	0.621321	0.976496	0.532925	0.484462	0.63423	0.659028	0.602759	0.711072	0.54756	0.611563	0.605991	0.477068	0.605652	0.642574	0.6048	0.66155	0.553585	0.492868	0.537374
Cell_0220	TFEB_TR	Glucose 17 mM + Glutamine 2.500000e-01 mM + EAA 1.000000e-01 X	1.33203	2.5753	0.514907	1.44944	1.07073	0.707231	1.33775	0.530325	1.53027	1.02191	1.14426	1.21429	1.64371	0.908934	1.46721	1.50324	0.703441	1.65293	1.07835	1.03277	1.39952	0.753143	1.36144	1.82415	0.867164	1.16505	2.08523	0.885025	1.30043	1.17106	0.637487	1.5894	1.0488	0.651743	3.00764	1.02514	1.27752	1.09242	0.494126	1.75234	0.961511	0.758192	1.53272	1.01418	1.28229	2.76513	0.936616
Cell_0220	FOXO_TR	Glucose 17 mM + Glutamine 2.500000e-01 mM + EAA 1.000000e-01 X	1.53962	1.41309	1.48192	1.25845	1.46387	0.929229	1.21434	1.12546	1.41519	1.50782	1.7287	1.5122	1.62569	1.44744	1.42346	1.34851	1.21203	1.29826	0.925673	1.55808	1.31748	1.00124	1.16592	1.22503	0.973631	1.20652	1.52927	1.46141	1.54441	2.18094	1.75462	1.31254	1.40351	1.44787	1.91241	1.75904	1.16098	1.47405	1.51688	1.61047	1.93518	1.80199	0.939335	1.38068	2.19235	1.83973	1.6449
Cell_0220	AMPKARt2	Glucose 17 mM + Glutamine 2.500000e-01 mM + EAA 1.000000e-01 X	0.487206	0.644388	0.65082	0.636707	0.612584	0.347123	0.646087	0.564674	0.451606	0.654447	0.717601	0.570977	0.734655	0.60107	0.620314	0.542673	0.587304	0.616036	0.679198	0.38083	0.757824	0.578629	0.608874	0.626096	0.5539	0.383445	0.41398	0.697141	0.637468	0.981095	0.533459	0.489335	0.617169	0.660185	0.596929	0.700428	0.524501	0.624912	0.605927	0.481665	0.601783	0.643222	0.61177	0.664136	0.558426	0.491768	0.546589
Cell_0221	TFEB_TR	Glucose 17 mM + Glutamine 2.500000e-01 mM + EAA 1.000000e-01 X	1.35835	2.02282	0.502973	1.57389	0.869661	0.720632	1.42866	0.532213	1.61566	1.0467	1.19416	1.36431	1.84002	0.865612	1.6107	1.80632	0.706051	1.73205	1.06696	1.08264	1.81197	0.609174	1.28588	1.86206	0.909848	1.10271	2.07521	1.35829	1.15183	1.15541	0.654855	1.52814	1.22817	0.687924	2.50417	1.09452	1.31351	1.47404	0.500943	1.58715	1.1681	0.905117	1.19211	1.0974	1.04601	2.40574	0.932724
Cell_0221	FOXO_TR	Glucose 17 mM + Glutamine 2.500000e-01 mM + EAA 1.000000e-01 X	1.47034	1.42796	1.4505	1.30034	1.47959	0.948426	1.24588	1.1027	1.39615	1.63958	1.67511	1.53137	1.64973	1.49767	1.45045	1.33098	1.18593	1.33342	0.898195	1.48556	1.35597	1.52475	1.13917	1.2064	0.938446	1.22526	1.50581	1.48744	1.57016	2.1049	1.83077	1.30287	1.37764	1.40743	2.04839	1.7847	1.13982	1.56307	1.54092	1.55702	1.92621	1.79338	0.924771	1.29817	2.11803	1.87985	1.68799
Cell_0221	AMPKARt2	Glucose 17 mM + Glutamine 2.500000e-01 mM + EAA 1.000000e-01 X	0.502263	0.654003	0.642073	0.639384	0.592176	0.355428	0.650339	0.577092	0.443914	0.656725	0.727856	0.567279	0.739889	0.597389	0.628444	0.530313	0.593278	0.621927	0.681326	0.391217	0.767097	0.704815	0.592407	0.62722	0.549386	0.385262	0.40078	0.703497	0.661722	0.973785	0.501202	0.500617	0.604935	0.656369	0.597063	0.679029	0.535021	0.617986	0.618738	0.482571	0.567995	0.645157	0.624816	0.665786	0.558741	0.497686	0.548833
Cell_0222	TFEB_TR	Glucose 17 mM + Glutamine 2.500000e-01 mM + EAA 1.000000e-01 X	1.27191	1.49519	0.4971	1.56414	0.989478	0.784362	1.57774	0.536949	1.53285	1.06594	1.21929	1.30441	1.8034	0.941753	1.65111	1.74149	0.713681	1.80616	1.01579	1.0562	1.92215	0.620657	1.01204	1.91841	0.90602	1.05317	2.13485	1.22872	1.13447	1.04677	0.669834	1.41782	1.25476	0.717986	2.85508	1.0412	1.15683	1.67355	0.495959	1.44152	1.215	0.794265	1.17648	1.23004	1.19623	2.22635	0.987967
Cell_0222	FOXO_TR	Glucose 17 mM + Glutamine 2.500000e-01 mM + EAA 1.000000e-01 X	1.42301	1.43833	1.44306	1.30927	1.53095	0.966164	1.23308	1.1146	1.38875	1.68561	1.74219	1.56898	1.68069	1.49498	1.46158	1.36193	1.18599	1.34704	0.914807	1.48062	1.37342	1.61199	1.12467	1.18906	0.928425	1.19876	1.48894	1.45642	1.57735	2.12946	1.88383	1.28742	1.33887	1.40351	2.02472	1.77811	1.13363	1.57381	1.57699	1.50441	2.01035	1.77191	0.916471	1.24021	2.16955	2.01725	1.74944
Cell_0222	AMPKARt2	Glucose 17 mM + Glutamine 2.500000e-01 mM + EAA 1.000000e-01 X	0.516202	0.655461	0.636045	0.643195	0.584801	0.350408	0.664526	0.590254	0.441561	0.653732	0.721401	0.589346	0.732557	0.592828	0.625794	0.530195	0.59811	0.621931	0.688419	0.376479	0.771268	0.708539	0.588169	0.639165	0.538947	0.399009	0.410491	0.711279	0.671371	0.965113	0.460929	0.499171	0.612859	0.660422	0.613603	0.678845	0.551579	0.601967	0.638496	0.476933	0.579915	0.643374	0.631323	0.662533	0.551042	0.507367	0.560878
Cell_0223	TFEB_TR	Glucose 17 mM + Glutamine 2.500000e-01 mM + EAA 1.000000e-01 X	1.20513	1.29845	0.511713	1.53932	0.808368	0.825118	1.58298	0.533296	1.43385	1.02586	1.28104	1.05982	1.70369	0.986229	1.55791	1.51083	0.702915	1.8559	1.02178	0.928717	1.81428	0.602349	0.896843	1.87596	0.8528	1.10287	2.17217	0.784121	1.28926	1.02614	0.725565	1.36057	1.14333	0.75991	3.13589	1.47328	1.10263	1.38207	0.481248	1.65442	1.10342	0.663396	1.25356	1.27182	1.44334	2.27226	1.10879
Cell_0223	FOXO_TR	Glucose 17 mM + Glutamine 2.500000e-01 mM + EAA 1.000000e-01 X	1.37246	1.45466	1.47256	1.31234	1.67714	0.982491	1.15237	1.12965	1.36374	1.60917	1.75099	1.60138	1.68913	1.47953	1.46017	1.35192	1.15797	1.32084	0.947729	1.50738	1.3841	1.58834	1.11783	1.17091	0.968005	1.16037	1.55067	1.40315	1.5762	2.12899	1.84879	1.30901	1.4009	1.42809	1.96	1.92386	1.15423	1.4655	1.60043	1.51817	2.10045	1.74296	0.950545	1.21617	2.31303	2.06147	1.76657
Cell_0223	AMPKARt2	Glucose 17 mM + Glutamine 2.500000e-01 mM + EAA 1.000000e-01 X	0.52005	0.661739	0.638996	0.640141	0.689447	0.359748	0.661159	0.589942	0.474187	0.652086	0.710077	0.611272	0.734408	0.574012	0.611911	0.533009	0.587098	0.602309	0.692572	0.357062	0.765893	0.711704	0.601817	0.639641	0.533179	0.407725	0.435471	0.706715	0.676532	0.975967	0.437404	0.488423	0.625361	0.666485	0.614749	0.655784	0.542781	0.609678	0.637991	0.475493	0.60347	0.641189	0.631758	0.651373	0.546604	0.506232	0.565359
Cell_0224	TFEB_TR	Glucose 17 mM + Glutamine 2.500000e-01 mM + EAA 1.000000e-01 X	1.27889	1.44845	0.530038	1.52695	0.720129	0.854431	1.41163	0.534463	1.47533	0.992296	1.3348	1.11725	1.64971	0.969929	1.46091	1.70617	0.682688	1.89065	1.08215	0.924735	1.74162	0.597613	0.870108	1.7471	0.777764	1.05958	2.07508	0.785002	1.50529	1.0861	0.848577	1.42725	1.19589	0.823673	2.4534	1.59345	1.37133	1.33513	0.481875	1.87064	1.04191	0.662087	1.21111	1.25318	1.14915	2.53544	1.1885
Cell_0224	FOXO_TR	Glucose 17 mM + Glutamine 2.500000e-01 mM + EAA 1.000000e-01 X	1.34904	1.4645	1.46728	1.29196	1.59215	1.00176	1.15296	1.12835	1.3662	1.61582	1.67193	1.56577	1.68599	1.52389	1.46775	1.31654	1.09065	1.25365	0.956189	1.52692	1.38958	1.61084	1.10407	1.15512	0.981266	1.16869	1.52726	1.42906	1.69085	2.1104	1.80534	1.37495	1.54243	1.42074	1.846	1.94036	1.13583	1.37733	1.59741	1.54002	2.05252	1.72785	0.975804	1.19359	2.42711	1.96067	1.77539
Cell_0224	AMPKARt2	Glucose 17 mM + Glutamine 2.500000e-01 mM + EAA 1.000000e-01 X	0.522956	0.674701	0.625638	0.618914	0.694731	0.381123	0.644497	0.584956	0.510111	0.654972	0.719042	0.602393	0.741395	0.546938	0.607637	0.534383	0.584052	0.590206	0.687495	0.339376	0.758005	0.714657	0.605958	0.635932	0.52842	0.396195	0.444021	0.709532	0.675225	0.991237	0.432194	0.50197	0.627415	0.663668	0.597943	0.661644	0.529657	0.620497	0.627091	0.496498	0.586942	0.651164	0.63572	0.654901	0.543772	0.525333	0.549609
Cell_0225	TFEB_TR	Glucose 17 mM + Glutamine 2.500000e-01 mM + EAA 1.000000e-01 X	1.31621	1.61878	0.532917	1.46847	0.68098	0.927241	1.25523	0.542151	1.42882	1.00677	1.33969	1.3462	1.62446	1.05733	1.51611	1.9456	0.689098	1.84625	0.860422	1.01494	1.55571	0.623979	0.835087	1.64009	0.742721	0.965276	1.97854	0.8567	1.6739	1.00884	0.982886	1.56095	1.26222	0.882668	2.60128	1.78752	1.54299	1.44924	0.49575	1.83503	0.981218	0.69681	1.22326	1.22258	0.884643	2.71254	1.16012
Cell_0225	FOXO_TR	Glucose 17 mM + Glutamine 2.500000e-01 mM + EAA 1.000000e-01 X	1.35548	1.43559	1.37158	1.25721	1.55241	1.00782	1.22949	1.13013	1.36233	1.73852	1.72568	1.46631	1.68978	1.55943	1.45617	1.33536	1.07036	1.16115	1.39444	1.5313	1.35481	1.69084	1.10015	1.1445	0.935827	1.1856	1.38022	1.48687	1.76553	2.18387	1.75066	1.41463	1.54313	1.39274	1.78773	1.87604	1.12178	1.35714	1.59242	1.52269	1.9832	1.72287	0.947462	1.18487	2.44876	1.90362	1.79491
Cell_0225	AMPKARt2	Glucose 17 mM + Glutamine 2.500000e-01 mM + EAA 1.000000e-01 X	0.518095	0.671526	0.612369	0.60728	0.694546	0.367118	0.643015	0.58392	0.516791	0.65658	0.732795	0.593011	0.73781	0.522682	0.616863	0.533498	0.586601	0.598288	0.599106	0.336499	0.755068	0.716502	0.605534	0.643924	0.524277	0.391003	0.44162	0.713623	0.675585	0.975461	0.434005	0.525521	0.632938	0.663752	0.591664	0.650004	0.529875	0.618174	0.637106	0.529293	0.579654	0.662852	0.636456	0.673217	0.529131	0.557237	0.545487
Cell_0226	TFEB_TR	Glucose 17 mM + Glutamine 2.500000e-01 mM + EAA 1.000000e-01 X	1.29228	1.60041	0.540964	1.4478	0.703728	0.981159	1.21208	0.552903	1.24271	1.00402	1.28843	1.52422	1.77454	1.26167	1.7099	1.66441	0.706041	1.69317	0.864509	0.9703	1.36915	0.643206	0.991518	1.6804	0.791984	0.951266	1.9498	0.92836	1.77887	0.966194	1.09817	1.59898	1.1787	0.915715	3.11062	1.78294	1.39666	1.26097	0.495016	1.85	0.956279	0.81471	1.0964	1.1914	1.21303	2.58832	1.09146
Cell_0226	FOXO_TR	Glucose 17 mM + Glutamine 2.500000e-01 mM + EAA 1.000000e-01 X	1.36263	1.39509	1.30676	1.25216	1.57634	1.01425	1.19281	1.16844	1.31825	1.803	1.83549	1.41924	1.69609	1.50854	1.44763	1.32244	1.08209	1.06921	1.35167	1.49755	1.30954	1.70115	1.11363	1.1615	0.911569	1.17575	1.32564	1.50128	1.63794	2.26606	1.67465	1.42569	1.44037	1.37586	1.84379	1.83376	1.18214	1.38298	1.59064	1.49566	2.01147	1.75917	0.942783	1.19315	2.35412	1.9687	1.78787
Cell_0226	AMPKARt2	Glucose 17 mM + Glutamine 2.500000e-01 mM + EAA 1.000000e-01 X	0.509834	0.66405	0.618023	0.617091	0.696248	0.314017	0.650714	0.583279	0.509289	0.652382	0.676237	0.592856	0.733429	0.477286	0.61625	0.530636	0.582903	0.607653	0.594165	0.37008	0.75132	0.716486	0.61115	0.649691	0.516575	0.406196	0.441889	0.682165	0.685922	0.956451	0.427514	0.521039	0.649377	0.676772	0.598836	0.645737	0.533823	0.621875	0.647659	0.532458	0.588302	0.638527	0.637547	0.670976	0.510817	0.530594	0.549958
Cell_0227	TFEB_TR	Glucose 17 mM + Glutamine 2.500000e-01 mM + EAA 1.000000e-01 X	1.43813	0.739961	0.556589	1.47983	0.719323	0.949978	1.20752	0.553904	1.17875	1.0079	1.2069	1.7565	1.94324	1.38529	1.85588	1.41633	0.70969	1.64316	0.936722	0.959216	1.42349	0.639189	1.15423	1.81414	0.871173	1.01675	1.9087	1.19504	1.8768	1.15014	1.20658	1.52229	1.01118	0.941283	2.33733	1.61012	1.20268	1.23649	0.487972	1.92931	1.05016	0.937848	0.805517	1.1655	1.53926	2.69969	1.05932
Cell_0227	FOXO_TR	Glucose 17 mM + Glutamine 2.500000e-01 mM + EAA 1.000000e-01 X	1.36884	1.62687	1.33907	1.2392	1.6324	1.0132	1.07019	1.18644	1.33006	1.85445	1.76502	1.44148	1.69743	1.47941	1.49808	1.25115	1.05151	1.049	1.34166	1.46945	1.29536	1.68296	1.11704	1.18638	0.929079	1.16728	1.40247	1.51389	1.60814	2.28701	1.66546	1.45506	1.43765	1.38993	1.77738	1.86479	1.21049	1.44241	1.57944	1.47804	2.04486	1.86075	0.968076	1.19664	2.21559	2.05328	1.78507
Cell_0227	AMPKARt2	Glucose 17 mM + Glutamine 2.500000e-01 mM + EAA 1.000000e-01 X	0.523056	0.715218	0.618332	0.619472	0.705618	0.304379	0.651219	0.580233	0.496346	0.647751	0.583372	0.593287	0.738004	0.426908	0.611487	0.541457	0.58454	0.613489	0.596997	0.414027	0.749594	0.712322	0.61391	0.645996	0.509227	0.414686	0.435151	0.623893	0.674521	0.954266	0.422248	0.51323	0.389527	0.676908	0.606552	0.660324	0.541638	0.626991	0.639829	0.509932	0.56874	0.580662	0.648663	0.659838	0.503379	0.465954	0.542334
Cell_0228	TFEB_TR	Glucose 17 mM + Glutamine 2.500000e-01 mM + EAA 1.000000e-01 X	1.59999	0.754692	0.557988	1.45402	0.706809	0.923131	1.18164	0.542334	1.20109	1.09109	1.2994	1.98473	1.84467	1.36343	1.87858	1.63815	0.719191	1.75122	0.959576	1.16257	1.82622	0.631731	1.02688	1.89205	0.901246	1.16271	1.87583	1.36455	1.87045	1.30533	1.29104	1.49869	1.11771	0.965684	2.31958	1.71827	1.21818	1.50593	0.492637	1.59464	1.15571	0.807272	0.89916	1.09789	1.55047	3.10465	1.0896
Cell_0228	FOXO_TR	Glucose 17 mM + Glutamine 2.500000e-01 mM + EAA 1.000000e-01 X	1.33993	1.63548	1.35844	1.2055	1.64947	0.983674	1.06	1.14009	1.37302	1.97291	1.6613	1.41711	1.67995	1.51052	1.53817	1.27024	1.03096	1.08264	1.35287	1.47102	1.33036	1.68251	1.10561	1.18157	0.934198	1.17287	1.45869	1.52228	1.83867	2.32824	1.69984	1.47148	1.48517	1.44017	1.60767	1.87773	1.13712	1.42593	1.55932	1.45173	2.03239	1.92202	0.936238	1.19361	2.13437	2.11149	1.81763
Cell_0228	AMPKARt2	Glucose 17 mM + Glutamine 2.500000e-01 mM + EAA 1.000000e-01 X	0.540417	0.715799	0.610194	0.612828	0.703413	0.355867	0.653794	0.576027	0.487943	0.650282	0.560135	0.604779	0.742286	0.423573	0.616368	0.56712	0.591536	0.620931	0.601897	0.436378	0.755682	0.705599	0.618203	0.647298	0.517555	0.409641	0.418954	0.576863	0.645549	0.934541	0.429442	0.525648	0.42879	0.650145	0.610057	0.675164	0.555505	0.623193	0.642084	0.512419	0.552461	0.537025	0.65459	0.675208	0.498657	0.458706	0.551212
Cell_0229	TFEB_TR	Glucose 17 mM + Glutamine 2.500000e-01 mM + EAA 1.000000e-01 X	1.56366	0.765446	0.556911	1.40324	0.721832	0.960797	1.15998	0.553646	1.1713	1.18724	1.5232	1.98902	1.66029	1.45061	1.87183	1.42659	0.739939	1.77647	0.905555	1.22045	2.25353	0.638187	0.845835	1.84793	0.891874	1.17269	1.8672	1.56557	1.77072	1.33253	1.33734	1.51807	1.20892	0.971549	3.56639	1.93468	1.36966	1.47659	0.497569	1.11006	1.13287	0.640569	1.29468	1.11807	1.62293	3.09164	0.847603
Cell_0229	FOXO_TR	Glucose 17 mM + Glutamine 2.500000e-01 mM + EAA 1.000000e-01 X	1.24053	1.64653	1.32587	1.22181	1.61962	0.972413	1.12849	1.1254	1.37576	2.01354	1.68685	1.35107	1.63426	1.48078	1.46593	2.44491	1.07289	1.07558	1.33549	1.44179	1.38741	1.67555	1.11636	1.16451	0.919282	1.17544	1.45326	1.46927	2.00285	2.3635	1.66554	1.45331	1.4658	1.44136	1.57541	1.85772	1.07605	1.34098	1.54197	1.41246	2.04083	1.86124	0.924389	1.18973	2.11185	2.16818	0.97787
Cell_0229	AMPKARt2	Glucose 17 mM + Glutamine 2.500000e-01 mM + EAA 1.000000e-01 X	0.526222	0.719758	0.618113	0.622633	0.68867	0.372043	0.657479	0.576598	0.503043	0.65394	0.569346	0.609683	0.739169	0.43357	0.613265	0.603963	0.597692	0.625279	0.609492	0.444713	0.754677	0.705404	0.625747	0.653253	0.516493	0.413446	0.411303	0.544806	0.655945	0.922637	0.431542	0.523338	0.428482	0.633261	0.606359	0.678236	0.556075	0.62264	0.655079	0.538928	0.572362	0.516054	0.655149	0.687848	0.486102	0.500683	0.533523
Cell_0230	TFEB_TR	Glucose 17 mM + Glutamine 2.500000e-01 mM + EAA 1.000000e-01 X	1.51732	0.771868	0.554257	1.42007	0.743167	0.976061	1.18533	0.594352	1.22169	1.20912	1.57265	1.65659	1.6721	1.77993	1.83961	1.57725	0.746357	1.64528	0.878718	1.0864	2.01687	0.640396	0.887327	1.79025	0.896941	0.968679	1.81677	1.67337	1.73156	1.28403	1.35037	1.49282	1.19773	0.983246	3.19709	1.76488	1.38755	1.31386	0.506792	1.39509	1.05361	0.790528	1.35229	1.32453	1.6663	2.80901	0.831175
Cell_0230	FOXO_TR	Glucose 17 mM + Glutamine 2.500000e-01 mM + EAA 1.000000e-01 X	1.16943	1.62082	1.30859	1.26061	1.62837	0.998887	1.12166	1.1727	1.41979	2.01146	1.66162	1.33898	1.58125	1.43131	1.34964	2.36812	1.10101	1.0452	1.31889	1.41163	1.38256	1.65592	1.14841	1.1649	0.914599	1.17301	1.43578	1.42157	1.97219	2.31295	1.59558	1.44165	1.38016	1.35269	1.59777	1.86686	1.09823	1.33915	1.5759	1.40109	2.07805	1.74252	1.05085	1.19805	2.11328	2.18236	0.959678
Cell_0230	AMPKARt2	Glucose 17 mM + Glutamine 2.500000e-01 mM + EAA 1.000000e-01 X	0.502857	0.719591	0.627829	0.637162	0.689621	0.349762	0.650838	0.572236	0.522159	0.650623	0.550969	0.595361	0.727711	0.411016	0.606149	0.586523	0.602845	0.626763	0.617066	0.447535	0.745671	0.71164	0.63436	0.646178	0.485179	0.432117	0.423302	0.5152	0.682115	0.962486	0.426885	0.503556	0.384454	0.645208	0.598049	0.675368	0.54212	0.621871	0.64938	0.548104	0.58789	0.497163	0.664049	0.679451	0.475023	0.523569	0.538926
Cell_0231	TFEB_TR	Glucose 17 mM + Glutamine 2.500000e-01 mM + EAA 1.000000e-01 X	1.44058	0.783246	0.532189	1.4407	0.720688	0.952096	1.26062	0.617169	1.28938	1.24347	1.6498	1.48702	1.7975	1.8996	1.78168	1.37532	0.736365	1.5308	0.870054	1.25554	1.53862	0.626859	1.02947	1.87709	0.892913	0.910312	1.75245	1.30101	1.69845	0.858765	1.34251	1.48688	1.1189	1.02115	1.95808	1.62858	1.30125	1.44755	0.532902	2.10078	1.07668	0.974144	1.33064	1.25954	1.58006	2.68876	0.838173
Cell_0231	FOXO_TR	Glucose 17 mM + Glutamine 2.500000e-01 mM + EAA 1.000000e-01 X	1.22301	1.58519	1.32136	1.23883	1.66903	1.0124	1.09986	1.18468	1.45916	2.16368	1.54	1.36329	1.5484	1.45812	1.3583	2.39714	1.06743	1.05086	1.35257	1.4191	1.33677	1.62587	1.15726	1.17134	0.928272	1.19271	1.43774	1.43302	1.92002	1.39231	1.58069	1.43422	1.30429	1.31181	1.60652	1.8856	1.13242	1.37321	1.66235	1.43566	2.09053	1.64353	1.19891	1.22395	2.09244	2.15311	0.957313
Cell_0231	AMPKARt2	Glucose 17 mM + Glutamine 2.500000e-01 mM + EAA 1.000000e-01 X	0.5066	0.705925	0.619519	0.631682	0.700678	0.363564	0.646677	0.541258	0.521372	0.646669	0.542104	0.593051	0.717634	0.410774	0.611667	0.588663	0.597021	0.629966	0.613759	0.44491	0.750868	0.71551	0.645257	0.629392	0.469695	0.455679	0.431951	0.497041	0.661207	0.629333	0.428672	0.504876	0.34515	0.657542	0.59315	0.679687	0.547349	0.617123	0.632526	0.541905	0.585889	0.48647	0.667634	0.682924	0.475717	0.530654	0.549974
Cell_0232	TFEB_TR	Glucose 17 mM + Glutamine 2.500000e-01 mM + EAA 1.000000e-01 X	1.32251	0.794834	0.523482	1.4045	0.680241	0.979866	1.32355	0.620806	1.19389	1.34344	1.94408	1.90914	1.84314	1.59143	1.85425	1.34593	0.736329	1.51533	0.878251	1.47692	1.89152	0.637532	1.01646	1.93449	0.839046	0.959857	1.75752	1.20176	1.73549	0.905842	1.34094	1.45553	1.11143	1.05962	2.25186	1.86204	1.28804	1.45963	0.551681	2.09171	1.1095	0.983857	1.65326	0.801011	1.63817	2.54106	0.851204
Cell_0232	FOXO_TR	Glucose 17 mM + Glutamine 2.500000e-01 mM + EAA 1.000000e-01 X	1.30474	1.58628	1.36283	1.22664	1.6163	1.01412	1.14323	1.17394	1.39314	2.34768	1.49202	1.37102	1.55833	1.46546	1.4759	2.48637	1.03699	1.07525	1.36931	1.36603	1.35107	1.67681	1.16809	1.15596	0.930462	1.23249	1.44453	1.41958	1.85955	1.4327	1.59202	1.41858	1.32213	1.3843	1.70173	1.86954	1.11271	1.33963	1.68569	1.47177	2.09225	1.61122	1.22062	1.22911	2.01058	2.18842	0.962011
Cell_0232	AMPKARt2	Glucose 17 mM + Glutamine 2.500000e-01 mM + EAA 1.000000e-01 X	0.516583	0.694273	0.614377	0.618228	0.710962	0.372582	0.650823	0.496564	0.519415	0.646668	0.537796	0.5996	0.727715	0.457173	0.606153	0.603468	0.586096	0.629008	0.60914	0.442188	0.762312	0.715135	0.644411	0.63066	0.485917	0.474405	0.418696	0.497844	0.639774	0.639586	0.432489	0.515568	0.368628	0.657799	0.594556	0.687402	0.568169	0.617926	0.626918	0.546335	0.5963	0.484397	0.661233	0.685488	0.489297	0.544494	0.550727
Cell_0233	TFEB_TR	Glucose 17 mM + Glutamine 2.500000e-01 mM + EAA 1.000000e-01 X	1.48164	0.792125	0.543705	1.39272	0.662002	1.02472	1.28158	0.649587	1.16147	1.37311	2.03216	1.8926	0.823129	1.53197	2.00537	1.52292	0.749605	1.52934	0.948144	1.21942	2.375	0.668995	0.953956	1.77807	0.79738	0.870076	1.80144	1.61091	1.85742	0.855046	1.34329	1.37214	1.12953	1.08372	2.58038	1.84964	1.27881	1.27858	0.539514	1.60475	1.04019	1.06622	1.6926	0.661964	1.59157	2.49842	0.857602
Cell_0233	FOXO_TR	Glucose 17 mM + Glutamine 2.500000e-01 mM + EAA 1.000000e-01 X	1.31334	1.60808	1.4269	1.29192	1.50885	1.02315	1.15083	1.19573	1.37628	2.41665	1.4806	1.35368	1.29769	1.41799	1.52138	2.57228	1.05027	1.10371	1.33809	1.2453	1.40003	1.82248	1.20861	1.13525	0.904166	1.24605	1.44532	1.38584	1.74406	1.43894	1.57676	1.42599	1.39668	1.44387	1.75011	1.8485	1.10555	1.32629	1.61817	1.50045	2.12186	1.67837	1.15793	1.30967	1.92517	2.27611	0.957509
Cell_0233	AMPKARt2	Glucose 17 mM + Glutamine 2.500000e-01 mM + EAA 1.000000e-01 X	0.505479	0.706161	0.620263	0.610319	0.72096	0.355494	0.648964	0.462024	0.531361	0.648037	0.51588	0.582929	0.590291	0.486263	0.586708	0.609358	0.587418	0.622758	0.611554	0.444084	0.757155	0.705168	0.637905	0.648472	0.491621	0.483781	0.420668	0.493809	0.662729	0.644862	0.437126	0.506202	0.432711	0.659014	0.599539	0.688085	0.566596	0.612499	0.628723	0.560865	0.608492	0.477734	0.65808	0.713324	0.508062	0.55222	0.552013
Cell_0234	TFEB_TR	Glucose 17 mM + Glutamine 2.500000e-01 mM + EAA 1.000000e-01 X	1.68644	0.783582	0.54879	1.47731	0.673984	0.979939	1.22683	0.693225	1.37825	1.32522	1.92816	1.19331	1.08575	1.9097	1.96174	1.38415	0.755473	1.55196	0.959818	0.956959	1.94322	0.689023	1.12196	1.68013	0.811234	0.947115	1.78866	1.56506	1.69845	0.8403	1.33004	1.39059	1.10032	1.08692	1.83201	1.61428	1.33562	1.53002	0.514306	1.4357	1.02294	1.12014	1.20985	0.666674	1.26635	2.59086	0.849473
Cell_0234	FOXO_TR	Glucose 17 mM + Glutamine 2.500000e-01 mM + EAA 1.000000e-01 X	1.29744	1.63863	1.47183	1.33622	1.50595	1.00762	1.11785	1.17838	1.48619	2.5635	1.39531	1.30764	1.27527	1.41679	1.50056	2.62135	1.0683	1.13152	1.33665	1.17234	1.39888	1.88737	1.19426	1.16325	0.882238	1.24203	1.48379	1.40728	1.6645	1.40716	1.56438	1.43664	1.41392	1.46129	1.70875	1.86708	1.16843	1.36267	1.57608	1.56913	2.10437	1.77459	1.10253	1.27311	1.891	2.30361	0.946428
Cell_0234	AMPKARt2	Glucose 17 mM + Glutamine 2.500000e-01 mM + EAA 1.000000e-01 X	0.496905	0.720541	0.623023	0.603561	0.684786	0.380213	0.648817	0.440112	0.545323	0.649879	0.506456	0.565428	0.608118	0.48735	0.585635	0.607532	0.588073	0.626816	0.611042	0.448156	0.749507	0.680111	0.645372	0.654517	0.487178	0.488303	0.448152	0.485862	0.673414	0.6563	0.438389	0.501518	0.463289	0.662536	0.602665	0.689782	0.560189	0.602485	0.627212	0.569322	0.603029	0.470053	0.65608	0.713474	0.507181	0.549552	0.566528
Cell_0235	TFEB_TR	Glucose 17 mM + Glutamine 2.500000e-01 mM + EAA 1.000000e-01 X	1.55025	0.791911	0.542325	1.58354	0.679137	0.934209	1.40123	0.725377	1.62269	1.28989	2.00255	1.46403	1.3602	1.96165	1.77795	1.22011	0.749537	1.60527	0.879526	1.13378	1.56411	0.75775	1.16267	1.74546	0.811372	1.15072	1.17173	1.24015	1.45532	0.88358	1.31698	1.4381	1.12683	1.09862	1.61291	1.75575	1.50765	1.86142	0.508328	1.52211	1.09365	1.06833	0.962588	0.711067	1.17263	2.53622	0.833505
Cell_0235	FOXO_TR	Glucose 17 mM + Glutamine 2.500000e-01 mM + EAA 1.000000e-01 X	1.29998	1.67005	1.51532	1.34712	1.52766	0.981599	1.14862	1.1089	1.56094	2.79654	1.30508	1.25895	1.13089	1.45856	1.5593	2.58582	1.07217	1.13812	1.35404	1.149	1.35042	1.87207	1.13634	1.20963	0.87376	1.25249	1.49288	1.42771	1.68527	1.39512	1.58869	1.40419	1.38788	1.52219	1.78331	1.93171	1.16191	1.3712	1.57857	1.67602	2.00863	1.77035	1.10139	1.32401	1.87615	2.31871	0.952094
Cell_0235	AMPKARt2	Glucose 17 mM + Glutamine 2.500000e-01 mM + EAA 1.000000e-01 X	0.511052	0.713651	0.629818	0.605668	0.603546	0.397619	0.657043	0.437996	0.5561	0.648413	0.498911	0.56953	0.61524	0.500829	0.594198	0.607377	0.582006	0.642337	0.616687	0.441492	0.753595	0.650622	0.646015	0.653336	0.496013	0.490525	0.549316	0.526479	0.65867	0.672234	0.428275	0.519571	0.45424	0.663583	0.601501	0.691397	0.576417	0.610528	0.623185	0.572403	0.597931	0.464165	0.656583	0.715938	0.487608	0.544746	0.569787
Cell_0236	TFEB_TR	Glucose 17 mM + Glutamine 2.500000e-01 mM + EAA 1.000000e-01 X	1.47225	0.814112	0.558101	1.57802	0.667752	0.990009	1.61078	0.772629	1.7176	1.21749	2.01585	2.32095	1.1525	1.63316	1.7897	1.3559	0.737364	1.64463	0.886459	1.37944	1.90644	0.889768	0.813109	1.6834	0.781823	1.02617	1.20817	1.30525	1.6344	0.855261	1.30554	1.37825	1.16033	1.15971	1.92429	2.09548	1.39959	1.55913	0.521608	1.6562	1.16753	1.18023	1.09524	0.724282	1.30712	2.62867	0.835932
Cell_0236	FOXO_TR	Glucose 17 mM + Glutamine 2.500000e-01 mM + EAA 1.000000e-01 X	1.31228	1.67649	1.57218	1.41249	1.4368	0.991856	1.17644	1.08115	1.54318	2.84214	1.26076	1.23919	1.08519	1.47396	1.67242	2.53526	1.07919	1.152	1.32503	1.13852	1.32775	1.88544	1.1812	1.18886	0.858927	1.24314	1.42391	1.42823	1.7154	1.44995	1.61389	1.37909	1.40375	1.5633	1.85457	2.01674	1.04331	1.36222	1.55904	1.75588	2.00352	1.69425	1.14646	1.35273	1.86435	2.38724	0.961766
Cell_0236	AMPKARt2	Glucose 17 mM + Glutamine 2.500000e-01 mM + EAA 1.000000e-01 X	0.52019	0.714058	0.639349	0.619262	0.570582	0.36386	0.65626	0.438567	0.562494	0.649446	0.472614	0.55839	0.611295	0.515652	0.59593	0.605431	0.590711	0.64597	0.627782	0.429004	0.754077	0.619103	0.624875	0.656538	0.510686	0.491617	0.5575	0.604709	0.657003	0.67841	0.420058	0.524204	0.449981	0.665252	0.598265	0.684773	0.584331	0.620899	0.621397	0.581644	0.602254	0.456922	0.665967	0.714036	0.489694	0.539695	0.55958
Cell_0237	TFEB_TR	Glucose 17 mM + Glutamine 2.500000e-01 mM + EAA 1.000000e-01 X	1.68591	0.813251	0.574127	1.51706	0.746202	0.995834	1.43841	0.841488	1.72416	1.26428	1.98685	2.06142	1.12257	1.49799	2.05272	1.37729	0.725164	1.64573	0.94799	1.40722	2.02139	0.996903	0.764227	1.53971	0.800574	0.918462	1.22513	1.35153	1.80459	0.82338	1.28566	1.35857	1.10216	1.20378	1.60711	2.51393	1.02879	1.25833	0.520567	1.70949	1.21608	1.28548	1.18512	0.673041	1.22427	2.89802	0.843084
Cell_0237	FOXO_TR	Glucose 17 mM + Glutamine 2.500000e-01 mM + EAA 1.000000e-01 X	1.32682	1.66759	1.59848	1.45331	1.3739	1.0082	1.13178	1.07778	1.51103	2.22175	1.21377	1.24136	1.19223	1.46206	1.73565	2.58079	1.08849	1.18812	1.29827	1.17042	1.35192	1.85764	1.285	1.15448	0.859396	1.2149	1.47736	1.47078	1.69339	1.4964	1.59444	1.41821	1.43836	1.53085	1.74617	2.06006	1.03551	1.33291	1.52906	1.78255	1.64008	1.67577	1.16401	1.28416	1.84699	2.41575	0.938964
Cell_0237	AMPKARt2	Glucose 17 mM + Glutamine 2.500000e-01 mM + EAA 1.000000e-01 X	0.509679	0.727107	0.638494	0.629069	0.59285	0.38255	0.650307	0.418554	0.560003	0.297038	0.461192	0.527197	0.616701	0.508935	0.603068	0.603751	0.605841	0.632115	0.607825	0.43506	0.75204	0.58138	0.605268	0.652348	0.52011	0.494948	0.577327	0.645255	0.653316	0.677746	0.420445	0.509995	0.463824	0.668812	0.597239	0.682794	0.577774	0.618532	0.62224	0.583262	0.537546	0.454357	0.673239	0.714277	0.509303	0.537427	0.560748
Cell_0238	TFEB_TR	Glucose 17 mM + Glutamine 2.500000e-01 mM + EAA 1.000000e-01 X	1.75322	0.789563	0.56882	1.55627	0.939322	0.897764	1.21226	0.904339	1.81298	1.27438	2.29627	1.50796	1.68989	1.53849	2.21116	1.32301	0.725835	1.63635	0.923478	1.27384	1.73375	1.09676	1.10526	1.58126	0.843207	1.16508	1.31292	1.21611	1.64097	0.895152	1.29255	1.41115	1.1131	1.20083	1.29058	2.98175	1.06403	1.4897	0.508118	1.53506	1.04103	1.27593	1.1879	0.663479	1.14731	3.12286	0.843513
Cell_0238	FOXO_TR	Glucose 17 mM + Glutamine 2.500000e-01 mM + EAA 1.000000e-01 X	1.30783	1.67221	1.66246	1.40511	1.40815	0.996209	1.10237	1.04523	1.54583	2.10524	1.15072	1.22911	1.20388	1.48028	1.74518	2.6168	1.11044	1.18911	1.31958	1.22689	1.32721	1.78919	1.30569	1.20544	0.883677	1.21442	1.50977	1.4785	1.72814	1.46897	1.5602	1.45225	1.4757	1.5447	1.72804	2.02662	1.16501	1.27366	1.51338	1.81763	1.70787	1.66951	1.14598	1.2523	1.79735	2.36071	0.920167
Cell_0238	AMPKARt2	Glucose 17 mM + Glutamine 2.500000e-01 mM + EAA 1.000000e-01 X	0.504794	0.701578	0.64457	0.631183	0.592259	0.445347	0.648387	0.426611	0.561265	0.283822	0.455932	0.519008	0.634237	0.504454	0.602912	0.605234	0.607109	0.621481	0.559982	0.44668	0.759692	0.560763	0.603662	0.651884	0.51403	0.48738	0.579678	0.650039	0.645972	0.679353	0.425412	0.518374	0.482334	0.670328	0.602847	0.683492	0.5803	0.621861	0.626327	0.567259	0.533592	0.459437	0.666397	0.721519	0.515613	0.541194	0.564125
Cell_0239	TFEB_TR	Glucose 17 mM + Glutamine 2.500000e-01 mM + EAA 1.000000e-01 X	1.54904	0.821536	0.571915	1.60431	1.09204	0.877737	1.35359	0.957956	2.03109	1.30372	2.44945	1.53855	1.71391	1.59077	2.07594	1.49878	0.737775	1.62905	0.932543	1.15051	1.70206	1.23537	1.1013	0.704352	0.833966	1.24886	1.3533	1.22374	1.66866	0.950449	1.33087	1.40586	1.17213	1.23189	1.70308	2.91087	1.47913	1.5691	0.528125	1.4664	0.974015	1.39652	1.09928	0.71894	1.34062	3.48367	0.863924
Cell_0239	FOXO_TR	Glucose 17 mM + Glutamine 2.500000e-01 mM + EAA 1.000000e-01 X	1.27143	1.69044	1.82785	1.37802	1.37392	0.989774	1.10375	1.03807	1.63952	2.12691	1.09469	1.17567	1.12496	1.55291	1.74559	2.5285	1.16028	1.17324	1.3248	1.26373	1.24358	1.73116	1.30188	1.99516	0.896511	1.21877	1.44912	1.41737	1.80179	1.45755	1.55989	1.41927	1.57886	1.5886	1.88801	1.96891	1.22234	1.27877	1.49978	1.90134	1.76031	1.58046	1.16408	1.30766	1.75619	2.30833	0.942971
Cell_0239	AMPKARt2	Glucose 17 mM + Glutamine 2.500000e-01 mM + EAA 1.000000e-01 X	0.505324	0.639265	0.656947	0.625676	0.570985	0.451573	0.640212	0.483095	0.573055	0.284357	0.42346	0.52622	0.634517	0.519047	0.58724	0.61019	0.606193	0.624937	0.524425	0.435884	0.764668	0.568399	0.620045	0.590575	0.497836	0.463672	0.562701	0.656589	0.658323	0.676998	0.443632	0.529882	0.47789	0.67207	0.609304	0.670893	0.575586	0.630044	0.636562	0.564276	0.530735	0.46303	0.655274	0.720317	0.528894	0.55028	0.556668
Cell_0240	TFEB_TR	Glucose 17 mM + Glutamine 2.500000e-01 mM + EAA 1.000000e-01 X	1.37996	0.933954	0.619065	1.56826	1.13645	0.91056	1.40243	0.973213	2.12426	1.37222	2.05715	1.43417	1.20974	1.6173	2.00389	1.59	0.755319	1.63958	1.02493	1.19952	1.68721	1.33973	1.01876	1.08383	0.86772	1.08686	1.22416	1.1188	1.78991	0.922619	1.35146	1.33678	1.11877	1.26552	2.09879	2.6741	1.62835	1.34119	0.558525	1.72892	0.941276	1.35239	1.01963	0.73159	1.45261	3.49204	0.88161
Cell_0240	FOXO_TR	Glucose 17 mM + Glutamine 2.500000e-01 mM + EAA 1.000000e-01 X	1.2907	1.69847	1.92663	1.38444	1.30498	0.99738	1.10373	1.05359	1.65876	2.19263	1.05504	1.13324	1.14487	1.58515	1.74825	2.45554	1.20291	1.21881	1.2802	1.28692	1.21099	1.62588	1.32983	1.98906	0.889253	1.20853	1.37932	1.42735	1.74668	1.4987	1.56695	1.3794	1.70191	1.55746	1.88767	1.92606	1.1992	1.33164	1.48639	1.97496	1.73963	1.49126	1.20732	1.32704	1.76011	2.33448	0.968421
Cell_0240	AMPKARt2	Glucose 17 mM + Glutamine 2.500000e-01 mM + EAA 1.000000e-01 X	0.494955	0.595067	0.637331	0.61567	0.56669	0.43824	0.640347	0.509361	0.576571	0.307203	0.4304	0.525224	0.625331	0.525802	0.587287	0.614402	0.606867	0.633742	0.503755	0.421668	0.761569	0.578097	0.63654	0.596744	0.499199	0.456808	0.565928	0.659919	0.662612	0.668836	0.46922	0.506833	0.431432	0.676785	0.609737	0.661474	0.569764	0.637817	0.641603	0.578941	0.51832	0.458358	0.659271	0.704808	0.548209	0.555008	0.553547
Cell_0241	TFEB_TR	Glucose 17 mM + Glutamine 2.500000e-01 mM + EAA 1.000000e-01 X	1.36965	1.08729	0.687797	1.58675	1.14825	0.897935	0.622251	0.923166	2.02275	1.36132	1.73816	1.39067	1.18404	1.52354	2.13359	1.46885	0.778875	1.63899	1.04887	1.31721	1.40222	1.38725	1.22654	0.964108	0.97379	1.13126	1.16976	0.928921	1.55951	0.924285	1.35663	1.21344	1.1649	1.27935	1.8717	3.03064	1.55654	1.36465	0.546108	1.95093	1.03255	1.07756	1.19962	0.720362	1.40277	2.83683	0.867034
Cell_0241	FOXO_TR	Glucose 17 mM + Glutamine 2.500000e-01 mM + EAA 1.000000e-01 X	1.31762	1.66187	1.81819	1.34963	1.34275	0.990656	1.63452	1.02735	1.62691	2.18651	1.02183	1.14745	1.19644	1.535	1.70151	2.47644	1.21007	1.27442	1.24794	1.30206	1.20561	1.55842	1.31191	1.96305	0.8798	1.21308	1.38495	1.4891	1.69953	1.47226	1.55376	1.37761	1.73168	1.57626	1.69421	1.8627	1.19666	2.7589	1.45995	1.99398	1.71628	1.4562	1.21315	1.3183	1.7603	2.40927	0.990406
Cell_0241	AMPKARt2	Glucose 17 mM + Glutamine 2.500000e-01 mM + EAA 1.000000e-01 X	0.495621	0.574325	0.600286	0.618711	0.566359	0.435268	0.463939	0.489745	0.572197	0.337949	0.526627	0.533222	0.635904	0.518232	0.60097	0.593426	0.603157	0.635127	0.490942	0.427869	0.7613	0.586542	0.634583	0.596046	0.508734	0.475434	0.595103	0.67064	0.646813	0.670169	0.484855	0.502792	0.374225	0.673183	0.606595	0.669639	0.589088	0.678581	0.627591	0.577435	0.514091	0.46114	0.67009	0.695688	0.534921	0.544951	0.547234
Cell_0242	TFEB_TR	Glucose 17 mM + Glutamine 2.500000e-01 mM + EAA 1.000000e-01 X	1.42911	1.32694	0.717285	1.59367	1.21047	0.986299	0.62936	0.874524	2.00811	1.28785	1.71193	1.75031	1.27834	1.56264	2.0716	1.36184	0.788784	1.57848	1.05076	1.32807	1.55988	1.41819	1.07433	0.865059	0.947033	1.19924	1.35425	1.25701	1.42123	0.94351	1.36788	1.14554	1.37248	1.39462	1.41007	3.14085	1.58986	1.47944	0.529703	2.01466	1.16284	1.13327	1.32895	0.758388	1.48604	2.37549	0.867046
Cell_0242	FOXO_TR	Glucose 17 mM + Glutamine 2.500000e-01 mM + EAA 1.000000e-01 X	1.273	1.57903	1.6723	1.30131	1.39015	0.982213	1.57156	1.00982	1.675	2.1459	0.986249	1.1649	1.18359	1.52019	1.59436	2.43922	1.21284	1.27005	1.2701	1.29439	1.20757	1.5936	1.26355	1.92265	0.887081	1.21899	1.50326	1.469	1.86661	1.36895	1.55098	1.38955	1.69677	1.71172	1.59698	1.77427	1.20914	2.89889	1.42062	1.98817	1.76428	1.40806	1.1798	1.35276	1.7459	2.40553	1.02733
Cell_0242	AMPKARt2	Glucose 17 mM + Glutamine 2.500000e-01 mM + EAA 1.000000e-01 X	0.511349	0.553764	0.603402	0.623896	0.555693	0.406262	0.461438	0.492413	0.578236	0.368719	0.60641	0.544463	0.62855	0.53049	0.600649	0.556183	0.602133	0.629761	0.487449	0.440069	0.763659	0.605754	0.631735	0.600032	0.504253	0.479954	0.606939	0.680033	0.643464	0.674863	0.494183	0.538941	0.349648	0.661634	0.59596	0.673198	0.598702	0.684021	0.61548	0.568479	0.530514	0.490536	0.668528	0.708707	0.514631	0.534275	0.515102
Cell_0243	TFEB_TR	Glucose 17 mM + Glutamine 2.500000e-01 mM + EAA 1.000000e-01 X	1.45157	1.57797	0.734174	1.45193	1.36436	1.12894	0.662484	0.868671	2.06817	1.24618	1.67677	1.79612	1.19787	1.80092	1.87858	1.34137	0.792372	1.55327	1.12358	1.22518	0.834652	1.40803	0.692224	0.828912	0.822355	1.0081	1.50544	1.6545	1.60643	0.895408	1.35844	1.25081	1.46841	1.54674	1.1369	2.70734	1.59482	1.45206	0.544671	2.03585	1.11011	1.28577	1.1445	0.783997	1.4875	2.44927	0.910852
Cell_0243	FOXO_TR	Glucose 17 mM + Glutamine 2.500000e-01 mM + EAA 1.000000e-01 X	1.2343	1.50896	1.74048	1.26321	1.39236	0.984328	1.67684	1.03601	1.69398	2.14179	0.957905	1.17259	1.18053	1.5517	1.54268	2.33994	1.24189	1.27804	1.31166	1.26368	1.45244	1.55493	1.25463	1.89114	0.912211	1.20847	1.62164	1.43581	2.0033	1.34163	1.5527	1.39296	1.66598	1.79661	1.6331	1.70507	1.23465	2.82733	1.40826	1.98603	1.77539	1.35264	1.14006	1.3628	1.74587	2.31636	1.04798
Cell_0243	AMPKARt2	Glucose 17 mM + Glutamine 2.500000e-01 mM + EAA 1.000000e-01 X	0.508491	0.533129	0.642266	0.610375	0.540242	0.394635	0.49741	0.516908	0.585424	0.38964	0.595486	0.543817	0.599061	0.558516	0.602153	0.552167	0.591453	0.628975	0.471432	0.441066	0.533054	0.617694	0.637201	0.608024	0.512355	0.468101	0.581171	0.657077	0.651352	0.650945	0.503686	0.541694	0.354276	0.665969	0.590406	0.658817	0.584054	0.684753	0.626245	0.57602	0.537869	0.526544	0.668333	0.718645	0.526399	0.541558	0.476573
Cell_0244	TFEB_TR	Glucose 17 mM + Glutamine 2.500000e-01 mM + EAA 1.000000e-01 X	1.38064	1.62493	0.813106	1.39931	1.5068	1.06037	0.683425	0.856149	2.06976	1.17645	1.67275	1.46012	1.23466	1.7602	1.94726	1.54723	0.847875	1.63677	1.1577	1.12277	0.779271	1.36322	0.805276	0.698996	0.838139	0.926762	1.43997	1.34722	1.71427	0.868183	1.33842	1.32433	1.52445	1.57781	1.16861	2.95812	1.55602	1.44954	0.548333	1.746	1.10196	1.03775	1.19963	0.780436	1.28259	2.78663	0.984703
Cell_0244	FOXO_TR	Glucose 17 mM + Glutamine 2.500000e-01 mM + EAA 1.000000e-01 X	1.26043	1.48763	1.93391	1.23995	1.44309	0.97421	1.78672	1.04229	1.6335	2.15943	0.939495	1.2076	1.15446	1.52974	1.63168	2.34592	1.28516	1.32991	1.33085	1.23564	1.37584	1.42963	1.25722	1.86912	0.923076	1.19995	1.6344	1.46247	1.89866	1.39709	1.5273	1.36843	1.61287	1.80676	1.63658	1.67628	1.26529	2.58681	1.41819	1.99567	1.72515	1.34303	1.12654	1.35223	1.72542	2.28041	1.03881
Cell_0244	AMPKARt2	Glucose 17 mM + Glutamine 2.500000e-01 mM + EAA 1.000000e-01 X	0.497416	0.514409	0.660301	0.608016	0.531369	0.420099	0.52623	0.524902	0.583643	0.382813	0.575699	0.546184	0.638719	0.568779	0.615172	0.56456	0.563638	0.626677	0.451282	0.433397	0.542505	0.615246	0.631435	0.610311	0.537704	0.474791	0.556625	0.645066	0.651467	0.606671	0.506516	0.520985	0.356478	0.683846	0.615665	0.646658	0.586488	0.682543	0.629351	0.580948	0.532543	0.538867	0.675046	0.696046	0.544653	0.553379	0.460855
Cell_0245	TFEB_TR	Glucose 17 mM + Glutamine 2.500000e-01 mM + EAA 1.000000e-01 X	1.27892	1.64334	0.892561	0.498363	1.53845	0.901313	0.684365	0.832212	2.15184	1.11852	1.62601	1.38513	1.09669	1.48863	2.0434	1.7707	0.968436	1.70433	1.16266	1.14805	0.78193	1.35288	0.974952	0.888797	0.887841	1.15958	1.36656	1.21203	1.78103	0.926761	1.34953	1.24283	1.611	1.62227	1.74264	3.50944	1.63701	1.53457	0.548534	1.38328	1.24235	0.88861	1.70194	0.81138	1.32496	3.12478	1.11059
Cell_0245	FOXO_TR	Glucose 17 mM + Glutamine 2.500000e-01 mM + EAA 1.000000e-01 X	1.27885	1.47499	1.90564	1.09074	1.48573	0.957039	1.74549	1.04684	1.65521	2.15462	0.929035	1.23904	1.09285	1.49468	1.7683	2.40709	1.30796	1.35372	1.3298	1.22594	1.3428	1.39422	1.24318	1.82238	0.917522	1.18835	1.61399	1.47465	1.8317	1.36287	1.50709	1.35082	1.53671	1.85075	2.69164	1.68668	1.26071	2.41239	1.42062	2.01289	1.74554	1.36255	1.13665	1.40891	1.67314	2.27721	1.02632
Cell_0245	AMPKARt2	Glucose 17 mM + Glutamine 2.500000e-01 mM + EAA 1.000000e-01 X	0.508905	0.495798	0.642246	0.574806	0.546129	0.420331	0.517396	0.525192	0.58467	0.37387	0.596426	0.541756	0.70877	0.570103	0.615366	0.550208	0.543917	0.6178	0.466182	0.424828	0.551878	0.613973	0.625061	0.609315	0.53552	0.49195	0.557135	0.66757	0.646349	0.587449	0.500172	0.539551	0.340769	0.687453	0.517781	0.651165	0.59518	0.682884	0.606306	0.573165	0.537005	0.538816	0.670304	0.664767	0.547788	0.551718	0.460907
Cell_0246	TFEB_TR	Glucose 17 mM + Glutamine 2.500000e-01 mM + EAA 1.000000e-01 X	1.27372	1.87804	0.882962	0.498458	1.58672	0.926569	0.692968	0.828482	2.18325	1.12158	1.39579	1.5455	1.14367	1.46776	1.85708	1.54145	1.1014	1.7508	1.2049	1.17783	0.780209	1.38415	0.915461	1.14557	0.842465	1.30533	1.36821	1.78872	1.75697	1.00239	1.36817	1.1656	1.51219	1.75663	1.56874	3.10682	1.73506	1.5245	0.565319	1.71015	1.1483	1.15567	1.96811	0.852978	1.46233	3.08941	1.2745
Cell_0246	FOXO_TR	Glucose 17 mM + Glutamine 2.500000e-01 mM + EAA 1.000000e-01 X	1.27303	1.4475	1.63392	1.12359	1.45002	0.963733	1.60813	1.08459	1.69544	2.12687	0.925339	1.24979	1.19217	1.51305	1.79663	2.36084	1.29248	1.39526	1.32235	1.21157	1.34608	1.41382	1.22347	1.73849	0.917146	1.16071	1.60348	1.47201	1.95036	1.25327	1.52153	1.39318	1.498	1.9084	2.73371	1.69593	1.24862	2.37724	1.43163	2.03813	1.78305	1.37048	1.12567	1.45336	1.63928	2.22225	1.05081
Cell_0246	AMPKARt2	Glucose 17 mM + Glutamine 2.500000e-01 mM + EAA 1.000000e-01 X	0.523766	0.480888	0.631286	0.582288	0.575874	0.403858	0.499359	0.523302	0.584252	0.382421	0.609611	0.527251	0.667699	0.576466	0.60767	0.544086	0.536601	0.628141	0.486387	0.419773	0.555861	0.610384	0.636782	0.606006	0.510478	0.494044	0.553171	0.675276	0.645298	0.599538	0.492853	0.553526	0.320339	0.679597	0.526458	0.655986	0.582327	0.68579	0.597695	0.573451	0.538669	0.547777	0.665254	0.643485	0.551451	0.545563	0.466149
Cell_0247	TFEB_TR	Glucose 17 mM + Glutamine 2.500000e-01 mM + EAA 1.000000e-01 X	1.3719	1.99457	0.85248	0.487749	1.71466	1.0198	0.694818	0.827953	1.98485	1.14484	1.26852	1.59842	1.7962	1.58765	1.66045	1.21975	1.19823	1.01919	1.16339	1.15968	0.76835	1.39138	1.14731	1.02957	0.853299	1.1665	1.32681	1.7659	1.4099	1.12307	1.37456	1.13783	1.44444	1.7557	1.90308	2.63263	1.6945	1.44512	0.546673	2.18147	0.878292	1.21473	1.70622	0.902388	1.31172	3.03641	1.38266
Cell_0247	FOXO_TR	Glucose 17 mM + Glutamine 2.500000e-01 mM + EAA 1.000000e-01 X	1.28372	1.4288	1.43708	1.09902	1.42695	0.991669	1.45739	1.08956	1.63274	2.05392	0.912617	1.25674	1.47139	1.54972	1.72497	2.23463	1.2534	1.02955	1.30411	1.18955	1.37614	1.35777	1.19479	1.6498	0.90398	1.12971	1.58042	1.48019	1.98804	1.27095	1.5414	1.42285	1.48854	1.94057	2.74693	1.6557	1.26389	2.3412	1.439	2.09471	1.72161	1.36058	1.10212	1.40678	1.62832	2.19341	1.10999
Cell_0247	AMPKARt2	Glucose 17 mM + Glutamine 2.500000e-01 mM + EAA 1.000000e-01 X	0.518832	0.476212	0.648178	0.56403	0.59053	0.420802	0.482226	0.514596	0.574332	0.383437	0.60195	0.537797	0.587086	0.57971	0.606607	0.559662	0.539152	0.523872	0.474064	0.426722	0.555677	0.602005	0.648625	0.598152	0.508754	0.490832	0.538725	0.679515	0.656075	0.614658	0.48907	0.534152	0.310984	0.681366	0.537936	0.652962	0.578268	0.689107	0.615445	0.583955	0.536888	0.558403	0.67037	0.597387	0.571103	0.546823	0.475234
Cell_0248	TFEB_TR	Glucose 17 mM + Glutamine 2.500000e-01 mM + EAA 1.000000e-01 X	1.47079	1.8891	0.85446	0.481649	1.7564	1.00122	0.676667	0.820587	1.87977	1.21563	1.38478	1.71742	1.92914	1.61648	1.67964	1.37282	1.24602	1.02124	1.0846	1.33451	0.780674	1.35514	1.37941	0.871266	0.884062	1.10136	1.34569	1.21532	1.38775	1.30952	1.39987	1.20385	1.65511	1.62843	2.16584	2.95364	1.5697	1.49164	0.522559	1.81332	0.983533	0.888248	1.29561	1.02412	1.25046	3.14078	1.41724
Cell_0248	FOXO_TR	Glucose 17 mM + Glutamine 2.500000e-01 mM + EAA 1.000000e-01 X	1.27822	1.41026	1.38181	1.08855	1.43293	1.00009	1.34808	1.06141	1.60598	1.94282	0.906164	1.22892	1.7687	1.58336	1.69573	2.11299	1.21393	1.09551	1.26707	1.19336	1.38872	1.28381	1.16985	1.58358	0.888251	1.12017	1.56219	1.46434	1.91038	1.37074	1.54274	1.39157	1.44101	1.94785	2.66366	1.61923	1.26838	2.29569	1.41711	2.14831	1.7141	1.33761	1.11308	1.38114	1.63706	2.16195	1.09763
Cell_0248	AMPKARt2	Glucose 17 mM + Glutamine 2.500000e-01 mM + EAA 1.000000e-01 X	0.511051	0.481002	0.655461	0.559766	0.594975	0.442663	0.467986	0.517683	0.570284	0.397416	0.595029	0.556341	0.610797	0.589009	0.603415	0.549596	0.567727	0.531139	0.484204	0.446163	0.562093	0.60662	0.647457	0.593546	0.526309	0.494056	0.537426	0.700197	0.663829	0.621803	0.485949	0.542226	0.306962	0.69356	0.548225	0.658481	0.594217	0.689081	0.61933	0.585575	0.544685	0.562425	0.669634	0.524425	0.59515	0.551897	0.473061
Cell_0249	TFEB_TR	Glucose 17 mM + Glutamine 2.500000e-01 mM + EAA 1.000000e-01 X	0.809713	2.01552	0.814774	0.483054	1.63732	0.964289	0.659559	0.828477	1.93873	1.23075	1.44842	1.90819	1.19859	1.75479	1.75556	1.65887	1.27727	1.07593	1.12473	1.46879	0.789914	1.34763	1.23216	0.73352	0.832037	1.26884	1.44349	1.5196	1.99312	1.37391	1.4209	0.785957	1.73984	1.59829	1.87814	3.09875	1.60372	1.58382	0.571928	1.36018	1.39531	0.799764	1.00721	1.2027	1.29881	2.84585	1.43697
Cell_0249	FOXO_TR	Glucose 17 mM + Glutamine 2.500000e-01 mM + EAA 1.000000e-01 X	1.50903	1.3866	1.30096	1.11787	1.3935	0.969279	1.29345	1.06961	1.64715	1.92751	0.930692	1.16638	2.0755	1.58731	1.72852	2.01358	1.20203	1.12409	1.22535	1.22376	1.36311	1.30611	1.16484	1.5578	0.908147	1.13998	1.51618	1.47733	1.92569	1.35254	1.52732	1.8619	1.37151	1.88339	2.56691	1.64701	1.24769	2.30854	1.41385	2.12815	1.86749	1.29238	1.12707	1.42209	1.69227	2.00406	0.978498
Cell_0249	AMPKARt2	Glucose 17 mM + Glutamine 2.500000e-01 mM + EAA 1.000000e-01 X	0.559772	0.479162	0.638824	0.583311	0.608675	0.432121	0.474696	0.53172	0.569537	0.452275	0.591556	0.547201	0.664328	0.603712	0.603104	0.529604	0.59702	0.500402	0.538534	0.449489	0.567872	0.628031	0.644816	0.604405	0.530071	0.497133	0.537301	0.694662	0.647796	0.626517	0.481662	0.5928	0.302848	0.702214	0.541686	0.667195	0.595918	0.682956	0.60456	0.576104	0.527729	0.570404	0.670167	0.473878	0.594317	0.559804	0.457667
Cell_0250	TFEB_TR	Glucose 17 mM + Glutamine 2.500000e-01 mM + EAA 1.000000e-01 X	0.759653	2.24883	0.733493	0.492017	1.47911	0.97891	0.646901	0.848855	1.8933	1.20797	1.3801	1.63719	0.788658	1.92915	1.73179	1.54271	1.31559	1.11388	1.14437	1.24917	0.807727	1.35856	1.18859	0.657959	0.850089	1.27861	1.45601	1.90329	2.15272	1.243	1.39454	0.816681	1.54522	1.57954	1.63122	2.83555	1.86518	1.54522	0.625202	1.60982	1.45159	0.98352	1.15932	1.38147	1.1986	2.77608	1.42827
Cell_0250	FOXO_TR	Glucose 17 mM + Glutamine 2.500000e-01 mM + EAA 1.000000e-01 X	1.40174	1.39561	1.2096	1.16883	1.34599	0.944568	1.2478	1.09449	1.63238	1.99601	0.940401	1.12161	2.29579	1.50494	1.74127	1.93471	1.22868	1.08426	1.2098	1.26772	1.37866	1.36164	1.17634	1.57824	0.932769	1.15228	1.43972	1.54571	1.92343	1.31225	1.50894	1.84915	1.35798	1.76427	2.58594	1.67505	1.24232	2.24787	1.45383	2.0753	1.98684	1.2484	1.11509	1.41798	1.75432	1.86559	0.884644
Cell_0250	AMPKARt2	Glucose 17 mM + Glutamine 2.500000e-01 mM + EAA 1.000000e-01 X	0.56863	0.467633	0.633185	0.588049	0.615592	0.423029	0.488262	0.539505	0.557881	0.488145	0.599062	0.545552	0.658334	0.601276	0.605684	0.537835	0.595565	0.496997	0.568885	0.425788	0.563294	0.64807	0.649476	0.627098	0.522619	0.49807	0.522771	0.676334	0.631895	0.630477	0.471056	0.59056	0.308835	0.696491	0.530387	0.663308	0.581414	0.682482	0.59601	0.575686	0.484912	0.581069	0.681845	0.457419	0.583404	0.574902	0.452217
Cell_0251	TFEB_TR	Glucose 17 mM + Glutamine 2.500000e-01 mM + EAA 1.000000e-01 X	0.782283	2.20551	0.698305	0.505241	1.41651	0.953319	0.641736	0.86073	1.89266	1.39081	1.48353	1.1413	0.865792	1.81159	0.576034	1.21425	1.31897	1.08809	1.08358	1.15608	0.841887	1.27026	1.28423	0.925304	0.937147	1.02283	1.49041	1.70911	1.56332	1.17143	1.3751	0.909896	1.47079	1.4667	1.75666	2.82334	1.96849	1.47217	0.618786	1.82576	1.08796	0.966597	1.70319	1.52254	1.27998	0.593468	1.40685
Cell_0251	FOXO_TR	Glucose 17 mM + Glutamine 2.500000e-01 mM + EAA 1.000000e-01 X	1.39166	1.41217	1.19901	1.20738	1.3528	0.951808	1.22626	1.10014	1.61745	1.93388	0.916497	1.09498	2.2463	1.38088	1.55736	1.844	1.24305	1.02062	1.21286	1.32325	1.42763	1.33831	1.21015	1.61006	0.92702	1.14237	1.43924	1.56828	1.8136	1.40423	1.5089	1.83824	1.38116	1.68266	2.65107	1.6514	1.24971	2.09325	1.50455	2.06652	1.97899	1.24095	1.13072	1.34648	1.76347	1.309	0.873025
Cell_0251	AMPKARt2	Glucose 17 mM + Glutamine 2.500000e-01 mM + EAA 1.000000e-01 X	0.576896	0.467049	0.645805	0.560517	0.608366	0.441233	0.494966	0.54973	0.559779	0.465063	0.611552	0.563596	0.64512	0.593733	0.582561	0.545817	0.591342	0.513459	0.568415	0.4145	0.564678	0.65197	0.656734	0.634646	0.53181	0.501342	0.511656	0.690608	0.637524	0.627316	0.4561	0.585782	0.323572	0.688905	0.541392	0.659199	0.579928	0.689588	0.596103	0.587089	0.472154	0.575266	0.687678	0.448066	0.595253	0.652047	0.458404
Cell_0252	TFEB_TR	Glucose 17 mM + Glutamine 2.500000e-01 mM + EAA 1.000000e-01 X	0.831214	2.16611	0.701653	0.491705	1.42221	0.873081	0.67113	0.868446	1.98722	1.55659	1.72333	1.13576	0.84843	1.6406	0.579504	1.26296	1.26728	1.05586	1.12147	1.35645	0.827163	1.13679	1.1676	1.0177	0.93069	0.925659	1.53828	2.10481	1.31441	1.28183	1.41017	0.820489	1.52153	1.43376	1.78301	2.66059	1.67401	1.48776	0.628447	1.66134	0.891096	0.953266	1.65732	1.64186	1.38732	0.614079	1.45581
Cell_0252	FOXO_TR	Glucose 17 mM + Glutamine 2.500000e-01 mM + EAA 1.000000e-01 X	1.38901	1.37746	1.22541	1.14187	1.35571	0.939413	1.2912	1.10572	1.66281	1.79685	0.919205	1.06075	2.07654	1.35148	1.54629	1.7557	1.21609	1.00427	1.19002	1.35103	1.39939	1.31048	1.25005	1.6396	0.914793	1.15202	1.49246	1.54096	1.86215	1.4599	1.53215	1.8827	1.37678	1.62515	2.70186	1.61744	1.23364	2.07375	1.55238	2.06476	1.98672	1.25177	1.1615	1.30554	1.73036	1.35085	0.876762
Cell_0252	AMPKARt2	Glucose 17 mM + Glutamine 2.500000e-01 mM + EAA 1.000000e-01 X	0.593157	0.480941	0.654728	0.541877	0.610116	0.450017	0.506363	0.559328	0.584042	0.435844	0.600107	0.55512	0.642055	0.604424	0.584918	0.53817	0.601406	0.500864	0.577729	0.42699	0.569326	0.64613	0.656042	0.615474	0.551733	0.506375	0.511737	0.715472	0.635211	0.619788	0.453606	0.593127	0.331123	0.697236	0.550199	0.660388	0.589081	0.685677	0.603396	0.585863	0.483257	0.562484	0.685676	0.438543	0.605714	0.670848	0.461002
Cell_0253	TFEB_TR	Glucose 17 mM + Glutamine 2.500000e-01 mM + EAA 1.000000e-01 X	0.793567	2.19515	0.691097	0.465475	1.35631	0.835459	0.715491	0.877942	1.91879	1.4394	1.71207	1.29137	0.807275	1.65173	0.583614	1.64966	1.21797	1.06042	1.19186	1.39492	0.787401	1.10279	1.03958	0.914788	0.877472	1.01927	1.44387	2.57352	0.817396	1.35012	1.42744	0.731439	1.46741	1.49048	1.74436	2.18909	1.35454	1.52434	0.65339	1.62547	1.04176	1.1542	1.1279	1.83768	1.28012	0.626596	1.51905
Cell_0253	FOXO_TR	Glucose 17 mM + Glutamine 2.500000e-01 mM + EAA 1.000000e-01 X	1.35532	1.33628	1.23805	1.03554	1.30932	0.902622	1.3889	1.10281	1.66865	1.81866	0.929988	1.03211	1.98186	1.45081	1.54928	1.71971	1.20871	1.03927	1.15185	1.33289	1.34138	1.36222	1.26066	1.66447	0.913295	1.18055	1.4802	1.53667	1.98145	1.35768	1.5672	1.94748	1.37045	1.54625	2.79235	1.60158	1.21258	2.15768	1.55087	2.03373	2.00013	1.28003	1.15452	1.33896	1.69765	1.36144	0.880586
Cell_0253	AMPKARt2	Glucose 17 mM + Glutamine 2.500000e-01 mM + EAA 1.000000e-01 X	0.602604	0.486103	0.658127	0.553792	0.622096	0.435236	0.498374	0.552605	0.590547	0.433096	0.577087	0.537253	0.620429	0.610499	0.58047	0.536077	0.608318	0.507481	0.581223	0.428568	0.563177	0.650409	0.649954	0.594402	0.532887	0.505333	0.510854	0.715824	0.69929	0.620468	0.454977	0.602652	0.33081	0.704858	0.534126	0.658738	0.587422	0.677068	0.613169	0.571171	0.487331	0.573082	0.688804	0.435244	0.599206	0.669044	0.464625
Cell_0254	TFEB_TR	Glucose 17 mM + Glutamine 2.500000e-01 mM + EAA 1.000000e-01 X	0.752844	2.03123	0.681431	0.479676	1.25547	0.854496	0.717654	0.879741	1.89266	1.33563	1.60007	1.29889	0.819609	1.51597	0.593106	1.69955	1.20471	1.07476	1.14293	1.40049	0.812927	1.09367	1.11729	1.35853	0.837281	1.0189	1.4729	2.26899	0.846275	1.31863	1.38454	0.928655	1.46403	1.4472	1.9097	2.32646	1.43175	1.56467	0.625936	1.70605	1.26108	1.13917	1.43966	2.02165	1.52505	0.630861	1.51357
Cell_0254	FOXO_TR	Glucose 17 mM + Glutamine 2.500000e-01 mM + EAA 1.000000e-01 X	1.37847	1.35097	1.25615	1.04058	1.29108	0.901493	1.41893	1.08787	1.63883	1.90852	0.899614	1.02805	1.86807	1.54683	1.6483	1.69	1.23446	1.09328	1.15427	1.33329	1.38002	1.40556	1.24775	1.62075	0.928239	1.19042	1.46394	1.53017	1.96614	1.28655	1.59658	1.95661	1.38273	1.51506	2.8374	1.6063	1.21766	2.11161	1.48966	2.05002	1.87285	1.3265	1.18189	1.39354	1.72518	1.36501	0.894279
Cell_0254	AMPKARt2	Glucose 17 mM + Glutamine 2.500000e-01 mM + EAA 1.000000e-01 X	0.594347	0.477517	0.660676	0.565517	0.628497	0.435689	0.462697	0.547503	0.579797	0.433579	0.580328	0.559248	0.602568	0.593746	0.585421	0.537622	0.611772	0.540408	0.57757	0.421447	0.572433	0.664144	0.650785	0.582588	0.483006	0.498198	0.506934	0.692991	0.702454	0.620216	0.438753	0.599927	0.332973	0.697895	0.53807	0.663269	0.585161	0.676189	0.612389	0.568083	0.497207	0.593767	0.693518	0.431426	0.595051	0.671301	0.470845
Cell_0255	TFEB_TR	Glucose 17 mM + Glutamine 2.500000e-01 mM + EAA 1.000000e-01 X	0.856029	1.99209	0.682455	0.50638	1.24566	0.863339	0.684513	0.905094	2.04448	1.30722	1.7494	0.83958	0.771198	1.3339	0.60617	1.39052	1.19719	1.07734	1.07976	1.49705	0.863376	1.01592	1.2012	1.48395	0.802728	1.05212	1.653	2.26436	0.844144	1.35037	1.35686	1.02601	1.58603	1.36599	1.95356	2.95354	1.77076	1.72386	0.617141	1.64574	1.41361	0.92121	1.34244	1.96851	1.8603	0.623181	1.52107
Cell_0255	FOXO_TR	Glucose 17 mM + Glutamine 2.500000e-01 mM + EAA 1.000000e-01 X	1.43745	1.38475	1.27938	1.07255	1.33198	0.92222	1.38921	1.11538	1.68564	1.90711	0.909037	1.62282	1.71712	1.5578	1.72176	1.649	1.22797	1.20709	1.18643	1.38419	1.47301	1.39041	1.22823	1.50726	0.964011	1.18918	1.4901	1.5098	2.03373	1.32798	1.60595	1.90342	1.38849	1.56063	2.75548	1.63315	1.2338	1.98144	1.49508	2.14656	1.68249	1.32732	1.78668	1.39707	1.81344	1.34864	0.896008
Cell_0255	AMPKARt2	Glucose 17 mM + Glutamine 2.500000e-01 mM + EAA 1.000000e-01 X	0.595668	0.502426	0.661838	0.550832	0.6237	0.451995	0.446746	0.553867	0.584476	0.433054	0.599722	0.648111	0.613006	0.586451	0.598389	0.540819	0.609143	0.543018	0.591333	0.42882	0.596168	0.668421	0.656236	0.570185	0.479969	0.500527	0.507016	0.677504	0.710965	0.610356	0.428273	0.598152	0.336018	0.69491	0.563735	0.672	0.59526	0.663093	0.606742	0.576954	0.493316	0.594522	0.610097	0.424574	0.585075	0.68321	0.471085
Cell_0256	TFEB_TR	Glucose 17 mM + Glutamine 2.500000e-01 mM + EAA 1.000000e-01 X	0.939661	2.13307	0.668251	0.497592	1.24923	0.856068	0.655225	0.990959	1.95102	1.14439	1.90957	0.925715	0.73548	1.4648	0.604929	1.23412	1.17194	1.10078	1.09505	1.28296	0.871635	0.970081	1.17573	0.729838	0.844728	1.19355	1.65856	2.27389	0.814981	1.3552	1.36413	0.910674	1.61911	1.44102	1.93332	3.02352	1.89611	2.00567	0.697202	1.59473	1.35575	0.960657	1.00588	1.86679	1.58044	0.611635	1.58096
Cell_0256	FOXO_TR	Glucose 17 mM + Glutamine 2.500000e-01 mM + EAA 1.000000e-01 X	1.44772	1.38367	1.28024	1.03734	1.34609	0.917908	1.32974	1.18521	1.7705	1.91121	0.985504	1.579	1.63467	1.57349	1.67986	1.65349	1.19726	1.45214	1.18572	1.42638	1.536	1.37934	1.21161	1.422	1.00309	1.21275	1.45865	1.52384	2.05739	1.3302	1.59906	1.86871	1.41194	1.59322	2.67114	1.6424	1.25278	1.88381	1.59048	2.22758	1.60459	1.30366	1.80263	1.35321	1.86165	1.31518	0.8894
Cell_0256	AMPKARt2	Glucose 17 mM + Glutamine 2.500000e-01 mM + EAA 1.000000e-01 X	0.612151	0.591424	0.664704	0.541366	0.614714	0.446725	0.452531	0.554485	0.583415	0.446201	0.608986	0.638884	0.642012	0.600636	0.603488	0.552279	0.598399	0.541704	0.603885	0.440624	0.582336	0.666137	0.660252	0.566104	0.511761	0.514662	0.510509	0.689807	0.719276	0.610073	0.439301	0.603592	0.33644	0.699423	0.541587	0.668773	0.598256	0.63724	0.600543	0.578035	0.461788	0.588784	0.609776	0.423681	0.577731	0.678197	0.474028
Cell_0257	TFEB_TR	Glucose 17 mM + Glutamine 2.500000e-01 mM + EAA 1.000000e-01 X	0.838951	1.94018	0.645868	0.492467	1.22971	0.860466	0.626917	1.08778	1.7308	1.00087	1.87287	0.827911	0.721518	1.56514	0.593446	1.21307	1.13661	1.16774	1.16659	1.03969	0.904285	1.00851	1.33478	0.830576	0.91083	0.747363	1.68086	1.61853	0.798081	1.23934	1.34474	1.00931	1.56735	1.55246	2.13972	2.74167	1.74981	2.18469	0.797723	1.66122	1.01015	1.17918	0.990305	2.02924	1.25057	0.62093	1.59174
Cell_0257	FOXO_TR	Glucose 17 mM + Glutamine 2.500000e-01 mM + EAA 1.000000e-01 X	1.44259	1.34664	1.27076	1.04628	1.31454	0.90809	1.24094	1.21805	1.77111	1.95814	1.0009	1.59242	1.56243	1.6272	1.68446	1.63981	1.1898	1.68849	1.15202	1.42578	1.58115	1.41118	1.20673	1.39013	1.04287	1.2414	1.50136	1.54694	1.96708	1.26622	1.57946	1.9356	1.45168	1.58088	2.66803	1.60365	1.27467	1.77641	1.62408	2.27208	1.60799	1.33464	1.77587	1.33572	1.84836	1.32109	0.892898
Cell_0257	AMPKARt2	Glucose 17 mM + Glutamine 2.500000e-01 mM + EAA 1.000000e-01 X	0.614487	0.666335	0.66535	0.558555	0.625434	0.43392	0.452394	0.552409	0.562779	0.461111	0.60888	0.661239	0.657781	0.603798	0.600585	0.56113	0.598921	0.557424	0.604837	0.44886	0.536894	0.667842	0.668321	0.570777	0.499873	0.488738	0.508607	0.701304	0.715443	0.614724	0.442053	0.60618	0.338181	0.702097	0.49533	0.667535	0.591189	0.620964	0.587872	0.568925	0.452737	0.58503	0.610349	0.421119	0.591534	0.666682	0.48291
Cell_0258	TFEB_TR	Glucose 17 mM + Glutamine 2.500000e-01 mM + EAA 1.000000e-01 X	0.752002	1.61219	0.639798	0.515423	1.35312	0.86967	0.611384	1.15158	1.89676	1.03169	1.91421	0.856235	0.694015	1.55136	0.590477	1.27958	1.11269	1.22589	1.24892	1.27956	1.01603	1.06738	1.60422	1.7203	0.899418	0.693928	1.81372	1.58349	0.799864	1.18911	1.31748	1.13909	1.58781	1.47159	2.14501	2.8192	1.77727	2.09809	0.868481	1.60934	0.810136	1.26047	1.10269	2.23125	1.23432	0.639633	1.50654
Cell_0258	FOXO_TR	Glucose 17 mM + Glutamine 2.500000e-01 mM + EAA 1.000000e-01 X	1.45875	1.30207	1.28908	1.10444	1.31596	0.909892	1.17792	1.20512	1.69547	1.95119	0.957612	1.60097	1.46856	1.63471	1.73558	1.54936	1.19019	1.66211	1.13934	1.43009	1.58894	1.48584	1.18741	1.37277	1.07625	1.21476	1.7742	1.53412	1.88292	1.23274	1.5603	1.95857	1.45156	1.57709	2.71008	1.59978	1.28779	1.67496	1.57787	2.3596	1.60059	1.35819	1.81249	1.34708	1.83775	1.35414	0.89763
Cell_0258	AMPKARt2	Glucose 17 mM + Glutamine 2.500000e-01 mM + EAA 1.000000e-01 X	0.608996	0.651274	0.659933	0.549629	0.645403	0.446255	0.456587	0.552853	0.562744	0.456334	0.597166	0.660661	0.639212	0.599052	0.577582	0.568329	0.604612	0.544003	0.605865	0.452555	0.515802	0.666088	0.675796	0.563512	0.476777	0.488909	0.497403	0.693316	0.707114	0.607514	0.442508	0.603565	0.341273	0.708714	0.503402	0.683093	0.594429	0.604737	0.587445	0.571651	0.465064	0.5697	0.6155	0.414024	0.592784	0.673658	0.487084
Cell_0259	TFEB_TR	Glucose 17 mM + Glutamine 2.500000e-01 mM + EAA 1.000000e-01 X	0.815392	1.59862	0.641692	0.535678	1.59262	0.875947	0.647097	1.23207	0.819068	1.16082	2.1294	0.915686	0.700395	1.81731	0.581505	1.49186	1.1082	1.21682	1.23422	1.47972	1.13744	1.13616	1.49007	1.39972	0.89814	0.65719	1.75734	2.03085	0.808678	1.22045	1.3205	1.00848	1.63842	1.3696	1.91614	2.87717	2.02775	1.95295	0.912132	0.749777	1.00171	1.17663	1.16939	2.22138	1.15503	0.634949	1.42141
Cell_0259	FOXO_TR	Glucose 17 mM + Glutamine 2.500000e-01 mM + EAA 1.000000e-01 X	1.46968	1.27847	1.33625	1.11351	1.37829	0.912242	1.18234	1.21865	1.28676	1.90959	0.983241	1.60787	1.46999	1.62427	1.69125	1.49188	1.18876	1.4281	1.16118	1.46826	1.52524	1.54934	1.16844	1.34742	1.05829	1.16073	1.96366	1.53099	1.87363	1.22692	1.57112	1.83727	1.42824	1.60147	2.70882	1.69359	1.30618	1.61118	1.55935	1.54925	1.59084	1.32197	1.83553	1.32316	1.83182	1.37187	0.886957
Cell_0259	AMPKARt2	Glucose 17 mM + Glutamine 2.500000e-01 mM + EAA 1.000000e-01 X	0.614572	0.609225	0.656312	0.492027	0.633849	0.457478	0.45807	0.551569	0.691172	0.4388	0.582562	0.640928	0.628202	0.61228	0.540601	0.582274	0.59907	0.51463	0.601469	0.439595	0.519208	0.663245	0.671668	0.548852	0.497762	0.496079	0.483554	0.685321	0.710701	0.613189	0.460076	0.608472	0.349724	0.712739	0.528285	0.68967	0.597453	0.582366	0.607363	0.592243	0.460926	0.564305	0.628674	0.426041	0.578917	0.681769	0.49179
Cell_0260	TFEB_TR	Glucose 17 mM + Glutamine 2.500000e-01 mM + EAA 1.000000e-01 X	0.874329	1.62213	0.636187	0.576896	1.68753	0.859125	0.710876	1.34084	1.00129	1.25485	2.28921	0.897488	0.704573	1.96924	0.565265	1.45259	1.09447	1.18369	1.14732	1.22424	1.22333	1.21042	1.41508	0.819984	0.902159	0.66911	1.71771	1.79117	0.833964	1.19869	1.30798	0.911861	1.61097	1.45537	2.02508	2.8579	2.05411	2.00908	0.914496	0.813231	1.12951	1.05332	1.03054	2.18487	1.2229	0.620953	1.43479
Cell_0260	FOXO_TR	Glucose 17 mM + Glutamine 2.500000e-01 mM + EAA 1.000000e-01 X	1.49193	1.26907	1.37195	1.12559	1.43404	0.927301	1.2118	1.25971	1.27443	1.90601	1.03633	1.71908	1.53014	1.66522	1.6124	1.4957	1.19027	1.2507	1.18807	1.48164	1.45611	1.53317	1.21434	1.29	1.00578	1.12585	1.83931	1.56023	1.89323	1.21901	1.58774	1.89014	1.42164	1.63193	2.55402	1.74675	1.31661	1.53175	1.54764	1.47202	1.60004	1.31694	1.80483	1.29935	1.82759	1.36725	0.868165
Cell_0260	AMPKARt2	Glucose 17 mM + Glutamine 2.500000e-01 mM + EAA 1.000000e-01 X	0.609419	0.615061	0.657197	0.453012	0.61843	0.441961	0.442642	0.558989	0.702865	0.427533	0.590885	0.652694	0.662263	0.622972	0.555317	0.582676	0.599707	0.510114	0.602639	0.426727	0.51352	0.667708	0.668436	0.543163	0.507308	0.509788	0.479145	0.686147	0.719331	0.632624	0.458265	0.627116	0.372039	0.707398	0.513042	0.678642	0.58972	0.580768	0.61447	0.607239	0.463106	0.576159	0.637314	0.441201	0.585581	0.676793	0.496097
Cell_0261	TFEB_TR	Glucose 17 mM + Glutamine 2.500000e-01 mM + EAA 1.000000e-01 X	0.847172	1.48625	0.629307	0.660056	1.60481	0.812067	0.740991	1.40811	0.985666	1.23383	2.1942	1.03046	0.673137	1.70882	0.570345	1.22161	1.07457	1.21475	1.12325	1.09576	1.33973	1.25133	0.656442	1.67583	0.818588	0.680826	1.86647	1.6037	0.852872	1.1991	1.26968	0.912218	1.54058	1.47253	2.23071	3.48186	1.88173	2.15145	0.88181	0.761751	1.03365	0.998125	0.798437	2.22571	1.42632	0.627105	1.47808
Cell_0261	FOXO_TR	Glucose 17 mM + Glutamine 2.500000e-01 mM + EAA 1.000000e-01 X	1.51569	1.24315	1.37048	1.1682	1.4123	0.952254	1.22035	1.26246	1.2733	1.92413	1.02834	1.85294	1.48311	1.68676	1.56049	1.46583	1.18063	1.18302	1.17741	1.45692	1.43861	1.47451	1.09364	1.21328	0.985868	1.11844	1.65574	1.55882	1.90208	1.22149	1.57099	2.21271	1.41379	1.64786	2.36272	1.7415	1.28559	1.44746	1.48266	1.46315	1.62234	1.36955	1.9355	1.35089	1.83988	1.33002	0.863363
Cell_0261	AMPKARt2	Glucose 17 mM + Glutamine 2.500000e-01 mM + EAA 1.000000e-01 X	0.585489	0.643118	0.656384	0.461625	0.639145	0.431473	0.435113	0.565533	0.704739	0.425172	0.601478	0.666285	0.695427	0.614794	0.608046	0.564008	0.607711	0.507545	0.614134	0.434074	0.504921	0.671081	0.480726	0.544399	0.478094	0.527369	0.487456	0.691815	0.720022	0.628974	0.436408	0.626297	0.391711	0.713715	0.486701	0.682654	0.59536	0.602066	0.600701	0.633929	0.46167	0.569125	0.632174	0.4245	0.588114	0.670362	0.490694
Cell_0262	TFEB_TR	Glucose 17 mM + Glutamine 2.500000e-01 mM + EAA 1.000000e-01 X	0.801634	1.42167	0.629287	0.70713	1.57091	0.819773	0.735575	1.42588	0.851972	1.26049	1.93584	1.06571	0.664653	1.70524	0.581655	1.35392	1.09404	1.29987	1.13446	1.30478	1.49501	1.28516	0.645762	2.42866	0.795326	0.6634	1.86583	1.87422	0.84207	1.24277	1.2492	0.893263	1.52695	1.3176	2.05378	4.07735	1.85507	2.16385	0.835876	0.739383	1.03781	0.963116	1.02577	2.25931	1.29457	0.661263	1.45865
Cell_0262	FOXO_TR	Glucose 17 mM + Glutamine 2.500000e-01 mM + EAA 1.000000e-01 X	1.4743	1.22161	1.38052	1.1448	1.35671	0.958738	1.20217	1.245	1.30604	1.91313	1.01434	1.83787	1.37264	1.65155	1.51365	1.43954	1.18199	1.133	1.1137	1.4967	1.43095	1.43798	1.07235	1.15558	0.976665	1.10671	1.57772	1.52917	1.85852	1.20378	1.55971	2.37977	1.41382	1.65411	2.30704	1.96393	1.28934	1.39827	1.43925	1.49687	1.60164	1.39092	2.14434	1.43388	1.86953	1.32882	0.871806
Cell_0262	AMPKARt2	Glucose 17 mM + Glutamine 2.500000e-01 mM + EAA 1.000000e-01 X	0.568535	0.662166	0.654255	0.470009	0.655406	0.445005	0.446102	0.553104	0.701637	0.43274	0.585993	0.655553	0.686034	0.611772	0.5775	0.560101	0.605722	0.480518	0.609221	0.435997	0.509743	0.671929	0.50152	0.548735	0.475428	0.535145	0.497239	0.687757	0.719709	0.617968	0.441964	0.586007	0.387775	0.730012	0.463171	0.695377	0.609184	0.61323	0.594128	0.64377	0.432141	0.557181	0.625281	0.437943	0.566628	0.657875	0.492179
Cell_0263	TFEB_TR	Glucose 17 mM + Glutamine 2.500000e-01 mM + EAA 1.000000e-01 X	0.783025	1.50707	0.633982	0.676654	1.64583	0.767505	0.726163	1.44608	0.902307	1.32765	1.8416	0.90352	0.677568	2.00632	0.587736	1.53506	1.11068	1.38038	1.21787	1.35884	1.55666	1.33416	0.645223	1.87912	0.877164	0.666407	1.78808	2.08493	0.836125	1.22406	1.23823	0.947017	1.54527	1.31502	1.84055	3.55637	1.01166	2.10369	0.793513	0.789254	1.0573	0.979462	1.40399	2.27061	1.08307	0.714813	1.44541
Cell_0263	FOXO_TR	Glucose 17 mM + Glutamine 2.500000e-01 mM + EAA 1.000000e-01 X	1.40513	1.25789	1.45216	1.0613	1.34638	1.3946	1.17652	1.27	1.32906	1.87362	1.01408	1.76984	1.34032	1.63755	1.54407	1.47293	1.20533	1.09249	1.08233	1.59147	1.37785	1.41758	1.0483	1.12224	0.947632	1.08945	1.60794	1.52925	1.77806	1.15558	1.57611	2.25689	1.45687	1.66569	2.21035	2.37975	1.6243	1.36216	1.48376	1.54136	1.51144	1.35798	2.13182	1.47499	1.93676	1.44144	0.8781
Cell_0263	AMPKARt2	Glucose 17 mM + Glutamine 2.500000e-01 mM + EAA 1.000000e-01 X	0.565871	0.670031	0.655733	0.466735	0.646711	0.587655	0.45638	0.545128	0.704194	0.450309	0.578078	0.65374	0.662125	0.61995	0.480141	0.574657	0.606296	0.448282	0.59684	0.433721	0.513659	0.674304	0.49984	0.547647	0.508968	0.530099	0.508907	0.673755	0.72646	0.625236	0.452675	0.562369	0.381796	0.722492	0.431871	0.681174	0.487589	0.603635	0.592651	0.638994	0.442444	0.569247	0.623441	0.543164	0.554783	0.639301	0.502643
Cell_0264	TFEB_TR	Glucose 17 mM + Glutamine 2.500000e-01 mM + EAA 1.000000e-01 X	0.80053	1.65471	0.634708	0.637052	1.66053	0.770386	0.712413	1.4753	1.03078	1.20488	1.91288	1.0296	0.669709	1.97333	0.648828	1.33589	1.06616	1.47341	1.3806	1.26046	1.50901	1.33648	0.64971	1.3311	0.84796	0.685556	1.87022	2.35005	0.865767	1.23053	1.22452	0.982472	1.54134	1.42963	1.90668	2.87541	1.12075	2.13856	0.765428	0.808668	0.920185	1.2012	1.19332	2.1693	1.18356	0.759833	1.48379
Cell_0264	FOXO_TR	Glucose 17 mM + Glutamine 2.500000e-01 mM + EAA 1.000000e-01 X	1.39551	1.31515	1.50735	1.00619	1.33631	1.39495	1.15496	1.30231	1.32541	1.85202	0.995732	1.78068	1.32118	1.66129	1.64171	1.49033	1.22238	1.07757	1.13289	1.61489	1.29047	1.40199	1.0537	1.10533	0.951543	1.07813	1.74371	1.52969	1.79137	1.14591	1.57002	2.09275	1.52368	1.65145	1.97566	2.58979	1.60915	1.3554	1.5277	1.58874	1.46577	1.34041	1.9882	1.46111	2.00675	1.54812	0.88034
Cell_0264	AMPKARt2	Glucose 17 mM + Glutamine 2.500000e-01 mM + EAA 1.000000e-01 X	0.574721	0.657516	0.656037	0.477229	0.64651	0.59478	0.454504	0.547741	0.705842	0.453916	0.588081	0.664293	0.657997	0.627535	0.442758	0.573161	0.615048	0.447369	0.600731	0.465702	0.511717	0.671855	0.499352	0.537848	0.519268	0.531558	0.526488	0.674803	0.724989	0.626541	0.437356	0.586019	0.396847	0.698896	0.41269	0.660093	0.497206	0.596828	0.580356	0.643637	0.494261	0.5698	0.619374	0.645741	0.553534	0.628194	0.503456
Cell_0265	TFEB_TR	Glucose 17 mM + Glutamine 2.500000e-01 mM + EAA 1.000000e-01 X	0.827326	1.71985	0.631348	0.63564	1.59995	0.765579	0.704059	1.49983	0.950319	1.16425	1.8597	1.30215	0.676478	1.79814	0.791784	1.29884	1.03996	1.58851	1.30819	0.541355	1.51525	1.28898	0.651945	1.37797	0.769986	0.687498	1.88924	2.35659	0.926598	1.34894	1.22671	0.981284	1.60811	1.3919	1.94111	3.00781	1.26514	2.252	0.737013	0.835855	0.88292	1.32306	0.926509	1.88865	1.55061	0.809151	1.52711
Cell_0265	FOXO_TR	Glucose 17 mM + Glutamine 2.500000e-01 mM + EAA 1.000000e-01 X	1.40682	1.30782	1.50618	1.0106	1.28814	1.34917	1.14514	1.3019	1.33787	1.87771	1.00723	1.7797	1.25486	1.68978	1.66646	1.49711	1.25027	1.06832	1.15189	1.37288	1.24548	1.38349	1.05911	1.08252	0.985765	1.08014	1.79572	1.49319	1.89885	1.16295	1.5378	2.02117	1.56731	1.605	1.85648	2.59205	1.6369	1.38977	1.50127	1.60911	1.4952	1.35296	1.88217	1.40975	2.00434	1.52283	0.869449
Cell_0265	AMPKARt2	Glucose 17 mM + Glutamine 2.500000e-01 mM + EAA 1.000000e-01 X	0.590372	0.644046	0.649387	0.47826	0.649472	0.592697	0.446162	0.534704	0.700036	0.432988	0.582166	0.671244	0.667079	0.631339	0.4362	0.561697	0.617368	0.477213	0.602248	0.540744	0.516818	0.669263	0.517584	0.541828	0.503642	0.537456	0.527289	0.669775	0.70044	0.621953	0.43614	0.598762	0.415056	0.696053	0.413385	0.658665	0.511174	0.608947	0.573297	0.643514	0.498984	0.552519	0.608075	0.656972	0.546343	0.613589	0.512355
Cell_0266	TFEB_TR	Glucose 17 mM + Glutamine 2.500000e-01 mM + EAA 1.000000e-01 X	0.84702	1.65812	0.653184	0.65045	1.66044	0.745181	0.731235	1.51141	0.884904	1.38959	1.75518	1.18741	0.717985	1.89252	0.974467	1.638	1.07261	1.66772	1.13515	0.529979	1.56708	1.26391	0.645525	1.34764	0.843346	0.681762	1.83686	1.9188	0.971272	1.39603	1.23275	1.04679	1.71006	1.36882	1.77039	3.19975	1.24691	2.24971	0.713396	0.903893	1.01436	1.07326	1.11999	1.60451	2.00213	0.896413	1.59119
Cell_0266	FOXO_TR	Glucose 17 mM + Glutamine 2.500000e-01 mM + EAA 1.000000e-01 X	1.36906	1.2613	1.6058	1.05389	1.27478	1.31183	1.18208	1.30889	1.33575	1.94388	1.04882	1.74135	1.24073	1.7163	1.60283	1.54629	1.27864	1.06045	1.1161	1.36862	1.26282	1.35692	1.01798	1.05055	1.01065	1.07611	1.79708	1.46489	1.90535	1.14128	1.53259	2.10646	1.58207	1.61887	1.87111	2.57324	1.64187	1.37737	1.48285	1.60147	1.47371	1.33088	1.76415	1.38961	1.94791	1.44189	0.8475
Cell_0266	AMPKARt2	Glucose 17 mM + Glutamine 2.500000e-01 mM + EAA 1.000000e-01 X	0.589302	0.657331	0.648635	0.442503	0.637221	0.587895	0.447849	0.522979	0.702759	0.423895	0.580696	0.675445	0.667687	0.626021	0.392169	0.573537	0.616323	0.489518	0.592942	0.544184	0.517178	0.672806	0.520898	0.564542	0.504837	0.536893	0.510479	0.644949	0.672625	0.632635	0.457218	0.581907	0.422141	0.710203	0.42244	0.654326	0.513058	0.623372	0.579862	0.633965	0.484189	0.558679	0.599345	0.638696	0.548798	0.594912	0.536345
Cell_0267	TFEB_TR	Glucose 17 mM + Glutamine 2.500000e-01 mM + EAA 1.000000e-01 X	0.902555	1.69646	1.2643	0.644898	1.80199	0.721677	0.77699	1.48859	0.952728	1.41376	1.79801	0.945843	0.71214	1.9455	1.17283	1.73074	1.06916	1.69928	1.32	0.524149	1.5365	1.25502	0.634666	1.06949	0.938304	0.685368	1.92054	1.72634	0.961183	1.23811	1.23869	0.995367	1.66419	0.737832	1.70163	3.00263	1.13458	2.11412	0.704798	0.899906	1.07541	0.966655	1.18898	1.43905	2.04604	0.99735	1.67135
Cell_0267	FOXO_TR	Glucose 17 mM + Glutamine 2.500000e-01 mM + EAA 1.000000e-01 X	1.31675	1.25322	2.65501	1.06372	1.29205	1.27969	1.24756	1.3167	1.28878	1.97619	1.05161	1.76116	1.22588	1.71684	1.53852	1.54792	1.25156	1.05934	1.1432	1.37592	1.24844	1.36972	0.991584	1.05674	1.07474	1.04726	1.97406	1.46519	1.79898	1.16052	1.5636	2.25844	1.59699	1.55233	1.80791	2.42129	1.5738	1.30465	1.50801	1.59667	1.4312	1.29309	1.68743	1.39972	1.90274	1.3799	0.85049
Cell_0267	AMPKARt2	Glucose 17 mM + Glutamine 2.500000e-01 mM + EAA 1.000000e-01 X	0.573017	0.670114	0.700026	0.414153	0.62349	0.59126	0.459194	0.528511	0.713347	0.441937	0.598807	0.663643	0.669593	0.621624	0.368589	0.590672	0.615586	0.474175	0.59388	0.545722	0.503645	0.670336	0.503169	0.581035	0.515028	0.544289	0.513395	0.64684	0.661322	0.64257	0.458314	0.577969	0.42097	0.572907	0.4345	0.645857	0.50341	0.620049	0.583469	0.636286	0.49315	0.571147	0.603724	0.640272	0.557865	0.591865	0.542386
Cell_0268	TFEB_TR	Glucose 17 mM + Glutamine 2.500000e-01 mM + EAA 1.000000e-01 X	0.991047	1.88968	1.24714	0.623445	1.7541	0.718817	0.797257	1.43754	0.910917	1.20035	1.83631	1.05956	0.648353	1.76844	1.34037	1.44768	1.02729	1.7173	1.44977	0.524465	1.5112	1.24951	0.632347	0.872774	0.96418	0.709998	2.04411	1.75752	0.994672	1.08711	1.27203	0.876238	1.578	0.736857	1.81674	2.84025	1.18096	2.10422	0.678097	0.802035	0.970557	1.22884	1.17509	1.30849	1.57005	1.13843	1.69421
Cell_0268	FOXO_TR	Glucose 17 mM + Glutamine 2.500000e-01 mM + EAA 1.000000e-01 X	1.28696	1.2831	2.57347	1.04123	1.26945	1.21879	1.27482	1.28545	1.25837	1.9036	1.03515	1.81072	1.12906	1.70719	1.50997	1.4786	1.2225	1.05693	1.19825	1.36585	1.1793	1.45958	1.02422	1.09479	1.18472	1.0352	2.11913	1.4387	1.79376	1.26194	1.58691	2.26471	1.60278	1.56405	1.73118	2.17077	1.50906	1.28318	1.50018	1.57992	1.47641	1.31997	1.68453	1.33709	1.90582	1.32726	0.871958
Cell_0268	AMPKARt2	Glucose 17 mM + Glutamine 2.500000e-01 mM + EAA 1.000000e-01 X	0.567754	0.658729	0.710837	0.427598	0.619274	0.597387	0.469468	0.525516	0.70605	0.451431	0.596815	0.637428	0.687876	0.631159	0.372733	0.585457	0.615113	0.465466	0.608794	0.551744	0.500783	0.659599	0.506663	0.582618	0.497644	0.558568	0.535944	0.656429	0.649199	0.645456	0.440305	0.582734	0.412668	0.57629	0.440664	0.655315	0.506139	0.618212	0.587564	0.641743	0.483273	0.555559	0.599021	0.636293	0.551378	0.587117	0.535052
Cell_0269	TFEB_TR	Glucose 17 mM + Glutamine 2.500000e-01 mM + EAA 1.000000e-01 X	1.02914	2.0019	1.26223	0.63352	1.57698	0.723525	0.778769	1.38503	0.888116	1.15891	1.75293	1.31605	0.654158	1.72303	1.42974	1.25737	1.22641	1.71272	1.19419	0.524649	1.55562	1.2901	0.629954	1.0906	1.04211	0.748983	2.14235	1.83385	1.1437	1.16895	1.31319	0.931193	1.60157	0.810951	1.80967	2.92519	1.29486	2.22434	0.645282	0.725657	0.762907	1.2904	1.55571	1.24081	1.19882	1.3452	1.67325
Cell_0269	FOXO_TR	Glucose 17 mM + Glutamine 2.500000e-01 mM + EAA 1.000000e-01 X	1.25125	1.31544	2.59439	1.08163	1.2423	1.17818	1.27861	1.24389	1.26963	1.85168	1.04716	1.78614	1.12384	1.72468	1.49445	1.45394	2.71999	1.05081	1.1799	1.32666	1.14777	1.57152	1.04865	1.11476	1.25809	1.06169	2.06571	1.40887	1.90249	1.31835	1.56618	2.2387	1.58059	1.50493	1.75377	2.02979	1.51535	1.31163	1.45138	1.52881	1.51243	1.36933	1.62382	1.33268	1.95626	1.3013	0.874149
Cell_0269	AMPKARt2	Glucose 17 mM + Glutamine 2.500000e-01 mM + EAA 1.000000e-01 X	0.564117	0.651289	0.717252	0.445532	0.630262	0.59296	0.489203	0.524694	0.687159	0.44357	0.595728	0.629542	0.694301	0.637344	0.35534	0.58394	0.551789	0.449807	0.61927	0.560447	0.521547	0.657313	0.517284	0.575395	0.46062	0.557082	0.548896	0.640718	0.62608	0.654621	0.43511	0.575902	0.410332	0.590892	0.439877	0.667716	0.521028	0.640974	0.600174	0.635444	0.48039	0.54191	0.571933	0.626148	0.540225	0.566181	0.538944
Cell_0270	TFEB_TR	Glucose 17 mM + Glutamine 2.500000e-01 mM + EAA 1.000000e-01 X	0.998452	1.9926	1.36103	0.659778	1.51251	0.71379	0.738468	1.33481	0.974612	1.22741	1.67174	1.30965	0.735522	1.97661	1.51843	1.30352	1.29384	1.67332	1.14783	0.523616	1.53723	1.31773	0.623782	1.51117	1.08864	0.798274	2.09732	2.17754	1.27812	1.32391	1.31938	0.927085	1.59186	0.798562	1.7092	3.10778	1.27164	2.19187	0.643964	0.704604	0.739778	1.02352	1.65788	1.36279	1.11929	1.45488	1.66949
Cell_0270	FOXO_TR	Glucose 17 mM + Glutamine 2.500000e-01 mM + EAA 1.000000e-01 X	1.22962	1.32908	2.56911	1.13636	1.24242	1.18305	1.29067	1.21815	1.28616	1.90482	1.06242	1.67985	1.23873	1.69843	1.43417	1.47764	2.73504	1.04233	1.13534	1.30529	1.15766	1.61773	1.05916	1.12792	1.26709	1.07603	1.91414	1.50112	1.93451	1.33998	1.52032	2.28757	1.58304	1.49799	1.76304	1.94095	1.53028	1.30724	1.41462	1.48123	1.46261	1.3837	1.53613	1.59844	1.98472	1.29123	0.87527
Cell_0270	AMPKARt2	Glucose 17 mM + Glutamine 2.500000e-01 mM + EAA 1.000000e-01 X	0.553352	0.654645	0.723347	0.452864	0.649805	0.585256	0.513201	0.547921	0.680113	0.443088	0.620343	0.64285	0.683364	0.632905	0.335522	0.595253	0.558267	0.418662	0.610137	0.557382	0.547314	0.665587	0.499795	0.571223	0.445149	0.537757	0.55603	0.652468	0.61148	0.657291	0.44777	0.572237	0.417195	0.59602	0.442808	0.668689	0.530209	0.662621	0.60462	0.626919	0.503435	0.558215	0.560708	0.609793	0.542498	0.560843	0.54435
Cell_0271	TFEB_TR	Glucose 17 mM + Glutamine 2.500000e-01 mM + EAA 1.000000e-01 X	1.00224	1.94038	1.43404	0.642929	1.50134	0.703282	0.708792	1.29756	0.898492	1.21929	1.61426	1.14538	0.763616	2.20193	1.64316	1.39062	1.35405	1.64342	1.27098	0.522809	1.47162	1.27473	0.642347	1.49908	0.981402	0.874209	1.81563	2.18519	1.33677	1.34924	0.552503	0.8234	1.54434	0.712243	1.80701	3.05192	1.14506	2.06283	0.638327	0.725183	1.04862	0.911608	1.1384	1.57952	1.19369	1.41863	1.64952
Cell_0271	FOXO_TR	Glucose 17 mM + Glutamine 2.500000e-01 mM + EAA 1.000000e-01 X	1.27409	1.33452	2.51804	1.1287	1.22666	1.18526	1.29118	1.20911	1.30375	1.86143	1.05874	1.57763	1.27765	1.61472	1.3361	1.48335	2.92611	1.02723	1.13649	1.32238	1.14154	1.59272	1.11796	1.13536	1.2229	1.0671	1.64652	1.61172	1.89242	1.41828	1.18348	2.19631	1.62419	1.54956	1.71668	1.84069	1.4993	1.29966	1.38872	1.48727	1.46219	1.42229	1.53845	1.88838	1.97585	1.26078	0.88252
Cell_0271	AMPKARt2	Glucose 17 mM + Glutamine 2.500000e-01 mM + EAA 1.000000e-01 X	0.563657	0.648235	0.721897	0.46205	0.650473	0.588918	0.516733	0.563369	0.674742	0.447866	0.612141	0.649872	0.690329	0.632219	0.31235	0.588512	0.561623	0.423235	0.59822	0.545115	0.558729	0.666728	0.494407	0.583208	0.470413	0.514721	0.567451	0.680575	0.61327	0.648072	0.59001	0.573893	0.414726	0.589792	0.455116	0.671881	0.525246	0.661642	0.59712	0.613656	0.494176	0.577593	0.572142	0.589593	0.546084	0.573664	0.548123
Cell_0272	TFEB_TR	Glucose 17 mM + Glutamine 2.500000e-01 mM + EAA 1.000000e-01 X	1.05981	1.84075	1.37007	0.612575	1.52711	0.687997	0.706425	1.30359	0.766664	1.17414	1.53644	1.09002	0.745226	2.15788	1.69674	1.44174	1.36959	1.65883	1.09415	0.525673	1.45735	1.25307	0.676218	1.2752	0.88351	0.942109	1.80365	1.62683	1.40835	1.35053	0.50845	1.02835	1.60319	0.770672	2.05728	2.87833	1.08184	2.04214	0.623937	0.824365	1.27529	1.15065	1.06677	1.7274	1.54904	1.46423	1.60455
Cell_0272	FOXO_TR	Glucose 17 mM + Glutamine 2.500000e-01 mM + EAA 1.000000e-01 X	1.32344	1.36732	2.61792	1.11796	1.2149	1.14933	1.28817	1.24394	1.32628	1.73112	1.06845	1.51454	1.25981	1.63679	1.31038	1.49668	3.02179	1.0085	1.1902	1.34191	1.11928	1.55445	1.18042	1.11086	1.14922	1.08291	1.57619	1.53991	1.90346	1.46075	1.16119	2.09393	1.62058	1.54605	1.70399	1.81906	1.47803	1.30573	1.37248	1.53327	1.55746	1.49164	1.59114	1.88702	2.06809	1.23805	0.869668
Cell_0272	AMPKARt2	Glucose 17 mM + Glutamine 2.500000e-01 mM + EAA 1.000000e-01 X	0.590505	0.642107	0.718856	0.454713	0.637987	0.5915	0.510031	0.558957	0.660223	0.450432	0.589845	0.641795	0.693114	0.634983	0.308753	0.575928	0.565658	0.454675	0.611579	0.543504	0.556057	0.659552	0.515106	0.592165	0.5075	0.503658	0.572221	0.669619	0.620818	0.64859	0.597148	0.573659	0.405898	0.590569	0.476457	0.677073	0.507979	0.659913	0.592704	0.580939	0.489183	0.582808	0.56466	0.606941	0.541267	0.571436	0.552827
Cell_0273	TFEB_TR	Glucose 17 mM + Glutamine 2.500000e-01 mM + EAA 1.000000e-01 X	1.03328	1.79384	1.34033	0.60871	1.70618	0.657907	0.729055	1.35153	0.819411	1.15655	1.52372	1.09144	0.753755	1.03627	1.69404	1.54606	1.27247	1.66906	1.05565	0.537901	1.40425	1.26366	0.67725	1.39541	0.90058	0.95751	2.14245	1.48231	1.49796	1.35825	0.531316	1.34046	1.65169	0.88567	2.21638	2.88842	1.17082	2.00142	0.640484	0.91001	1.27167	1.47626	1.5681	1.80563	1.31651	1.58756	1.63597
Cell_0273	FOXO_TR	Glucose 17 mM + Glutamine 2.500000e-01 mM + EAA 1.000000e-01 X	1.2874	1.40181	2.77967	1.08457	1.239	1.10157	1.29349	1.31332	1.3164	1.81486	1.10899	1.44235	1.26758	1.46506	1.35692	1.57411	2.89857	0.989463	1.25474	1.36032	1.11366	1.5151	1.18026	1.09149	1.09241	1.11726	1.89014	1.51298	1.92173	1.43546	1.16687	2.25266	1.56843	1.51932	1.71318	1.81691	1.50318	1.27708	1.38534	1.5569	1.6257	1.51843	1.66109	1.75575	2.16409	1.24161	0.864726
Cell_0273	AMPKARt2	Glucose 17 mM + Glutamine 2.500000e-01 mM + EAA 1.000000e-01 X	0.593395	0.642646	0.731697	0.4517	0.640148	0.579557	0.508365	0.564985	0.647405	0.455892	0.61221	0.630487	0.668729	0.572255	0.403198	0.580394	0.569254	0.45919	0.63268	0.54942	0.549532	0.660158	0.505462	0.580457	0.514003	0.51038	0.569724	0.661021	0.6274	0.660509	0.611092	0.576066	0.403949	0.597198	0.492995	0.676687	0.508086	0.663583	0.596199	0.53101	0.531429	0.591215	0.548754	0.645469	0.685818	0.573491	0.544138
Cell_0274	TFEB_TR	Glucose 17 mM + Glutamine 2.500000e-01 mM + EAA 1.000000e-01 X	0.963456	1.83758	1.39956	0.600674	1.81907	0.652716	0.758656	1.38313	0.896534	1.26666	1.59102	1.09691	0.765203	0.996842	1.69744	1.63686	1.19882	1.63489	1.28184	0.545253	1.28189	1.23946	0.67453	1.43103	0.922579	0.974189	2.13668	2.0635	1.57138	1.28555	0.55534	1.26423	1.57611	0.82119	2.1596	2.74487	1.28131	1.87068	0.641626	0.906041	1.26757	1.57008	1.4543	1.77777	1.22012	1.54125	1.69737
Cell_0274	FOXO_TR	Glucose 17 mM + Glutamine 2.500000e-01 mM + EAA 1.000000e-01 X	1.21852	1.38626	2.86502	1.03658	1.25049	1.10143	1.29208	1.35713	1.25967	2.05583	1.13883	1.38246	1.25475	1.43498	1.33745	1.6807	2.80145	0.975705	1.2638	1.38978	1.08304	1.47385	1.17342	1.11595	1.04792	1.11678	1.99016	1.67616	1.88113	1.442	1.13147	2.34958	1.55052	1.51934	1.68425	1.75869	1.53822	1.25424	1.40348	1.55644	1.6556	1.49866	1.72653	1.67057	2.11173	1.23821	0.877282
Cell_0274	AMPKARt2	Glucose 17 mM + Glutamine 2.500000e-01 mM + EAA 1.000000e-01 X	0.575614	0.634584	0.734896	0.478393	0.642991	0.57181	0.506575	0.575111	0.639625	0.445125	0.619087	0.633966	0.670308	0.573872	0.510889	0.572406	0.565279	0.458254	0.634866	0.545572	0.542196	0.662451	0.47381	0.575032	0.491736	0.517083	0.567734	0.675498	0.633095	0.665905	0.626245	0.577756	0.40064	0.600885	0.490037	0.678412	0.534503	0.658248	0.604439	0.486681	0.545024	0.597929	0.555916	0.641389	0.699557	0.616179	0.529979
Cell_0275	TFEB_TR	Glucose 17 mM + Glutamine 2.500000e-01 mM + EAA 1.000000e-01 X	1.02696	1.8007	1.32834	0.591021	1.67533	0.681006	0.744379	1.36678	0.865824	1.4408	1.64188	1.14613	0.767587	0.964794	1.60202	1.55551	1.35447	1.63552	1.21245	0.538058	1.23238	1.23996	0.72336	1.06256	0.918966	1.0374	1.94067	0.609211	1.59592	1.24145	0.510546	1.11271	1.54442	0.714576	1.97397	2.55991	1.28989	1.80186	0.605289	1.07384	1.13495	1.39053	0.963738	1.64705	1.0782	1.3859	1.62925
Cell_0275	FOXO_TR	Glucose 17 mM + Glutamine 2.500000e-01 mM + EAA 1.000000e-01 X	1.20784	1.35265	2.90293	1.09582	1.24265	1.15076	1.28117	1.36921	1.21439	2.16717	1.13997	1.37492	1.25041	1.51974	1.267	1.69739	2.77136	0.988936	1.23269	1.39976	1.06037	1.46268	1.19469	1.1696	1.02274	1.08817	1.73811	2.89247	1.83933	1.44579	1.10981	2.20371	1.55772	1.49999	1.63815	1.73154	1.56238	1.25811	1.40601	1.59881	1.69129	1.47672	1.70468	1.54399	2.05666	1.22242	0.86519
Cell_0275	AMPKARt2	Glucose 17 mM + Glutamine 2.500000e-01 mM + EAA 1.000000e-01 X	0.572008	0.623586	0.714035	0.476455	0.631563	0.577124	0.518697	0.56609	0.634502	0.409185	0.610867	0.656398	0.691329	0.574834	0.505145	0.54822	0.565413	0.458484	0.631134	0.546011	0.542594	0.656757	0.461652	0.587359	0.474723	0.512287	0.561202	0.70487	0.638523	0.662145	0.629128	0.581396	0.390088	0.597623	0.48263	0.679487	0.527567	0.650649	0.604443	0.46868	0.516801	0.589773	0.562167	0.614513	0.691281	0.663754	0.526078
Cell_0276	TFEB_TR	Glucose 17 mM + Glutamine 2.500000e-01 mM + EAA 1.000000e-01 X	1.0971	1.72418	1.22712	0.598318	1.51242	0.702548	0.705894	1.36038	0.8069	1.45963	1.63049	1.11447	0.768908	1.01134	1.42888	1.47007	1.52035	1.69855	1.072	0.537361	1.26315	1.25871	0.765733	0.914832	0.924721	1.0786	2.01233	0.690238	1.54971	1.27298	0.468779	1.30556	1.6625	0.783725	1.85701	2.77845	1.29471	1.78537	0.610045	1.47381	0.984517	1.09891	1.27219	1.62614	1.08171	1.31773	1.53774
Cell_0276	FOXO_TR	Glucose 17 mM + Glutamine 2.500000e-01 mM + EAA 1.000000e-01 X	1.23118	1.35202	2.85361	1.15717	1.25113	1.20078	1.28135	1.39501	1.20438	2.13843	1.13949	1.34768	1.24844	1.69667	1.25823	1.65172	2.64455	1.02124	1.21089	1.39201	1.0989	1.4709	1.16599	1.2255	1.05769	1.07672	1.63769	2.82457	1.81742	1.41662	1.15464	2.17022	1.53304	1.44266	1.61652	1.72333	1.5675	1.2342	1.42572	1.66413	1.67501	1.50228	1.6498	1.40671	2.01243	1.21067	0.853759
Cell_0276	AMPKARt2	Glucose 17 mM + Glutamine 2.500000e-01 mM + EAA 1.000000e-01 X	0.583074	0.618521	0.720385	0.446029	0.62771	0.564661	0.541966	0.560745	0.630023	0.391343	0.638101	0.669822	0.673251	0.5971	0.467866	0.550159	0.575289	0.42288	0.629308	0.564108	0.557747	0.658438	0.441851	0.599509	0.481853	0.51251	0.557545	0.696426	0.641473	0.65375	0.617178	0.593992	0.37963	0.59063	0.491058	0.670576	0.47254	0.650007	0.594742	0.462146	0.510094	0.590399	0.553676	0.616694	0.688818	0.671078	0.522254
Cell_0277	TFEB_TR	Glucose 17 mM + Glutamine 2.500000e-01 mM + EAA 1.000000e-01 X	1.0476	1.89571	1.28375	0.590311	1.47944	0.729318	0.750704	1.37647	0.802094	1.33694	0.801345	1.09651	0.741432	1.10479	1.3143	1.50471	1.43004	1.69105	1.20188	0.543471	1.23011	1.20914	0.757376	1.18941	0.925691	1.07474	1.90845	0.749561	1.54516	1.30266	0.494072	1.43613	1.73414	0.892341	1.86298	2.87353	1.35785	1.82028	0.64608	1.65728	1.11995	0.620034	1.81396	1.72158	1.16943	1.24131	1.56767
Cell_0277	FOXO_TR	Glucose 17 mM + Glutamine 2.500000e-01 mM + EAA 1.000000e-01 X	1.24436	1.37207	2.73235	1.11334	1.2402	1.2372	1.33494	1.4222	1.17034	2.08534	1.54933	1.27584	1.18166	1.77323	1.24154	1.68559	2.45347	1.02084	1.18473	1.4089	1.11179	1.48015	1.07892	1.2574	1.10673	1.07557	1.67743	2.70213	1.80317	1.44129	1.15803	2.23	1.51471	1.38517	1.6377	1.65119	1.53231	1.24686	1.45958	1.66388	1.6146	1.09868	1.66724	1.36184	1.95787	1.19748	0.872534
Cell_0277	AMPKARt2	Glucose 17 mM + Glutamine 2.500000e-01 mM + EAA 1.000000e-01 X	0.586699	0.617589	0.744856	0.465309	0.639251	0.530749	0.535406	0.576095	0.624742	0.411822	0.534381	0.655581	0.659602	0.628203	0.472662	0.568643	0.571812	0.397919	0.626317	0.562227	0.567905	0.666468	0.413004	0.615272	0.504379	0.521733	0.570514	0.700846	0.649097	0.639436	0.611355	0.601003	0.374877	0.595996	0.509058	0.664916	0.438766	0.657067	0.604395	0.447019	0.521514	0.537296	0.554493	0.633096	0.703964	0.656019	0.516559
Cell_0278	TFEB_TR	Glucose 17 mM + Glutamine 2.500000e-01 mM + EAA 1.000000e-01 X	1.09157	2.22584	1.29761	0.580932	1.46769	0.777454	0.864599	1.3422	0.832297	1.24717	0.980096	1.29006	0.71046	1.22078	1.18493	1.44731	1.33573	1.58597	1.18215	0.53965	1.16059	1.17899	0.782844	1.33489	0.941963	1.09851	1.62988	0.683599	1.56562	1.35514	0.514556	1.16081	1.6097	0.875411	1.98889	2.66066	1.40185	2.03901	0.628044	1.64164	1.24334	0.59587	1.59946	1.6856	1.02355	1.08234	1.59756
Cell_0278	FOXO_TR	Glucose 17 mM + Glutamine 2.500000e-01 mM + EAA 1.000000e-01 X	1.26217	1.37612	2.70979	1.15792	1.19439	1.25773	1.40608	1.40381	1.10629	2.06907	1.55733	1.22415	1.14154	1.7453	1.16059	1.70964	2.39145	0.986095	1.17683	1.43434	1.07217	1.50713	1.02279	1.27314	1.14124	1.06361	1.68051	2.66904	1.7867	1.49362	1.1177	2.18449	1.54518	1.38438	1.68505	1.6008	1.47847	1.3495	1.44808	1.63062	1.5681	1.06943	1.69294	1.34234	1.90286	1.19004	0.87278
Cell_0278	AMPKARt2	Glucose 17 mM + Glutamine 2.500000e-01 mM + EAA 1.000000e-01 X	0.579656	0.626162	0.711318	0.504739	0.649295	0.527666	0.50761	0.574722	0.62736	0.421409	0.525897	0.642682	0.67818	0.640952	0.475222	0.559484	0.563121	0.418054	0.634532	0.5201	0.561863	0.664565	0.415066	0.628892	0.508237	0.51558	0.575862	0.707449	0.671869	0.630518	0.623508	0.590929	0.371404	0.613215	0.525119	0.668849	0.440509	0.671353	0.626643	0.440517	0.527397	0.535653	0.563777	0.636159	0.713944	0.647676	0.515001
Cell_0279	TFEB_TR	Glucose 17 mM + Glutamine 2.500000e-01 mM + EAA 1.000000e-01 X	1.24244	2.27771	1.30484	0.618083	1.46238	0.800296	0.940985	1.28597	0.864085	1.31198	0.929747	1.35687	0.702446	1.32255	1.03353	1.38388	1.43557	1.54579	0.993727	0.539053	1.2481	1.21908	0.871167	1.44583	0.517116	1.12794	1.72539	0.675883	1.43719	1.39043	0.496583	0.882114	1.52259	0.81378	2.10703	2.65318	1.36192	2.30789	0.591504	1.94081	1.20494	0.55955	1.36923	1.55303	0.808972	1.00901	1.60321
Cell_0279	FOXO_TR	Glucose 17 mM + Glutamine 2.500000e-01 mM + EAA 1.000000e-01 X	1.27194	1.35808	2.75241	1.28544	1.16833	1.25199	1.39606	1.37618	1.06758	2.11808	1.59446	1.18609	1.17569	1.79137	1.13596	1.62665	2.55802	0.977619	1.22369	1.42532	1.12314	1.52553	1.00409	1.28414	1.46252	1.06359	1.70956	2.67779	1.72763	1.4885	1.10884	2.23018	1.55545	1.41878	1.70237	1.62528	1.43759	1.41297	1.42453	1.64437	1.52062	1.07114	1.67692	1.32596	1.91729	1.215	0.85353
Cell_0279	AMPKARt2	Glucose 17 mM + Glutamine 2.500000e-01 mM + EAA 1.000000e-01 X	0.57151	0.634053	0.656886	0.504846	0.645698	0.559684	0.507814	0.55089	0.635891	0.394348	0.542932	0.655716	0.666337	0.640601	0.483347	0.540313	0.567149	0.41246	0.649595	0.480858	0.549817	0.66214	0.42402	0.619621	0.500074	0.497668	0.560065	0.706127	0.693953	0.638293	0.628151	0.576788	0.359266	0.617129	0.53711	0.665521	0.43682	0.676325	0.62261	0.448664	0.521763	0.55184	0.569588	0.62991	0.714756	0.655874	0.510495
[truncated: 345 more rows]
[truncated: 15 more columns]

## Sheet: condition 02
Treatment Spike															Glucose 17 mM + Glutamine 2.500000e-01 mM																									Vehicle
[truncated: 1,096 more rows]
[truncated: 15 more columns]

## Sheet: condition 03
Treatment Spike															EAA 1.000000e-01 X																									Glucose 17 mM + Glutamine 2.500000e-01 mM
[truncated: 895 more rows]
[truncated: 15 more columns]

[truncated: 1 more sheets: condition 04]
