# Supplementary material for: Continuous sensing of nutrients and growth factors by the mTORC1-TFEB axis
Source: eLife. 2023 Sep 12;12:e74903. doi: 10.7554/eLife.74903 (PMC10547473; doi:10.7554/eLife.74903)
Supplement: Figure 4—source data 5. [file elife-74903-fig4-data5.xlsx]

## Sheet: condition 01
Treatment Spike															EAA 1.000000e-01 X																									Insulin 10000 ng/ml
Cell	Signal	Treatment Group	0 minute	6 minute	12 minute	18 minute	24 minute	30 minute	36 minute	42 minute	48 minute	54 minute	60 minute	66 minute	72 minute	78 minute	84 minute	90 minute	96 minute	102 minute	108 minute	114 minute	120 minute	126 minute	132 minute	138 minute	144 minute	150 minute	156 minute	162 minute	168 minute	174 minute	180 minute	186 minute	192 minute	198 minute	204 minute	210 minute	216 minute	222 minute	228 minute	234 minute	240 minute	246 minute	252 minute	258 minute	264 minute	270 minute	276 minute
Cell_0001	TFEB_TR	EAA 1.000000e-01 X + Insulin 10000 ng/ml	1.21432	1.31079	2.09656	1.55611	0.625606	1.4422	0.858612	0.882619	1.30324	1.43357	0.819115	0.626858	1.20186	2.41527	1.83306	1.65939	1.40905	1.12862	1.46727	0.674537	0.81126	1.06528	1.65112	1.24072	1.14661	0.902639	1.41312	1.72801	1.9028	3.37418	0.727534	0.693832	2.72675	1.0579	2.18434	1.93967	1.89338	1.23084	1.44634	0.842983	1.01863	1.60573	1.21667	0.947011	0.974798	1.3785	1.03975
Cell_0001	FOXO_TR	EAA 1.000000e-01 X + Insulin 10000 ng/ml	1.09797	1.08134	2.9367	1.92441	1.87427	3.14684	1.69116	1.36739	3.04869	2.4499	1.55829	1.8011	1.66982	2.16505	2.07153	2.11253	1.48456	2.60595	1.20654	1.2967	2.17973	1.54373	1.55825	2.44854	2.26751	1.50675	2.18846	2.2561	1.80485	2.80245	1.86351	1.75418	3.04525	1.87287	2.63153	2.35257	1.49482	1.55386	3.36464	1.22636	2.35184	3.01764	2.47123	2.0618	2.48222	2.18377	1.56197
Cell_0001	AMPKARt2	EAA 1.000000e-01 X + Insulin 10000 ng/ml	0.345996	0.590846	0.459016	0.639256	0.579978	0.542689	0.545982	0.611068	0.681411	0.61118	0.740538	0.592953	0.739416	0.679475	0.66204	0.648856	0.472971	0.432668	0.535924	0.610739	0.653582	0.593011	0.638356	0.661122	0.616789	0.716856	0.643739	0.617636	0.615659	0.59013	0.579352	0.614242	0.533963	0.531271	0.682547	0.605693	0.611559	0.490724	0.752257	0.489108	0.633483	0.524003	0.67576	0.594535	0.711447	0.712942	0.591001
Cell_0002	TFEB_TR	EAA 1.000000e-01 X + Insulin 10000 ng/ml	1.13178	1.3275	2.04982	1.69394	0.640326	1.39994	0.855644	0.903186	1.31023	1.7556	0.817899	0.610782	1.14542	2.00361	1.27126	1.86763	1.48084	1.1793	1.48221	0.638445	0.797203	1.20473	1.57695	1.19942	0.859557	0.893446	1.37731	1.99716	1.53755	2.97096	0.72391	0.647653	2.507	1.04557	1.93171	1.75638	0.915535	1.26753	1.51285	0.935564	0.918601	1.6987	1.25736	0.915537	0.951142	1.46324	1.026
Cell_0002	FOXO_TR	EAA 1.000000e-01 X + Insulin 10000 ng/ml	1.05255	1.07613	2.78876	1.92128	1.8331	2.94994	1.67106	1.40008	3.19773	2.39922	1.5033	1.70625	1.67333	2.19039	1.98398	2.21416	1.44351	2.7253	1.23364	1.24204	2.19359	1.56542	1.5377	2.49053	2.22625	1.43716	2.10418	2.28128	1.69531	2.77659	1.93437	1.64234	3.09176	1.94838	2.68903	2.42962	1.50022	1.71153	3.50196	1.2452	2.50355	2.93268	2.44716	2.05285	2.39344	2.09656	1.7312
Cell_0002	AMPKARt2	EAA 1.000000e-01 X + Insulin 10000 ng/ml	0.368881	0.591389	0.46223	0.656591	0.592018	0.551297	0.55539	0.620624	0.679673	0.613468	0.741357	0.588944	0.741154	0.694871	0.662025	0.657112	0.487156	0.437822	0.530895	0.615984	0.648548	0.576203	0.648391	0.66405	0.621698	0.710047	0.64682	0.618616	0.611222	0.591675	0.584982	0.617017	0.540455	0.525393	0.679732	0.583256	0.59252	0.49433	0.751472	0.507333	0.647018	0.514119	0.680055	0.587634	0.691245	0.718846	0.583621
Cell_0003	TFEB_TR	EAA 1.000000e-01 X + Insulin 10000 ng/ml	1.06888	1.45522	1.95006	1.58695	0.636075	1.36207	0.876183	0.9184	1.31179	1.82819	0.865258	0.638536	1.13789	2.27058	1.12052	1.64263	1.33013	1.2465	1.47149	0.636312	0.766269	1.19995	1.59431	1.11522	0.805792	0.867504	1.38999	2.26595	1.49974	3.24014	0.735898	0.623049	2.33088	1.09828	2.10652	1.76371	1.15712	1.30406	1.36554	0.997361	1.06768	1.65509	1.3	0.896518	0.95574	1.37637	1.37092
Cell_0003	FOXO_TR	EAA 1.000000e-01 X + Insulin 10000 ng/ml	0.991568	1.07683	2.59456	1.83197	1.8422	2.82126	1.62752	1.46698	3.20694	2.42871	1.55595	1.73906	1.69286	2.21006	2.00989	2.17672	1.42168	2.74811	1.2614	1.24879	2.15478	1.56879	1.56459	2.47372	2.20352	1.43309	2.07961	2.25638	1.64197	2.79655	2.0181	1.50342	3.20885	2.04	2.80063	2.4658	1.59967	1.74892	3.63884	1.23291	2.48221	2.91439	2.46562	2.22624	2.34846	2.02837	2.16599
Cell_0003	AMPKARt2	EAA 1.000000e-01 X + Insulin 10000 ng/ml	0.381277	0.589008	0.45071	0.658049	0.589372	0.559351	0.54648	0.629003	0.675734	0.607028	0.737405	0.568279	0.736596	0.68697	0.670398	0.646988	0.493595	0.456036	0.536082	0.627503	0.643896	0.573105	0.648463	0.667714	0.641068	0.712533	0.643232	0.621123	0.60316	0.589826	0.587817	0.62623	0.549549	0.526268	0.698298	0.584932	0.581831	0.495271	0.760044	0.516161	0.631403	0.508422	0.683582	0.604482	0.706069	0.70951	0.60953
Cell_0004	TFEB_TR	EAA 1.000000e-01 X + Insulin 10000 ng/ml	1.00731	1.51376	1.90396	1.45724	0.633361	1.30924	0.892582	1.01156	1.29824	1.7538	0.896866	0.653541	1.12795	2.69719	1.95348	1.55436	1.31078	1.26372	1.5418	0.626954	0.732547	1.15736	1.65005	1.08801	0.968394	0.845907	1.40413	2.22936	1.56982	3.69039	0.739282	0.622365	2.44177	1.20296	1.8626	1.85309	1.40821	1.26723	1.2745	1.08997	1.15615	1.67226	1.32923	0.971726	0.933724	1.27635	1.49235
Cell_0004	FOXO_TR	EAA 1.000000e-01 X + Insulin 10000 ng/ml	0.944661	1.07184	2.55273	1.75783	1.84694	2.79385	1.59659	1.52548	3.0912	2.45678	1.6118	1.7776	1.66809	2.26063	2.06634	2.01311	1.43137	2.78657	1.25608	1.26086	2.19807	1.57608	1.63547	2.28736	2.28814	1.41342	2.08874	2.24796	1.62155	2.80541	2.15359	1.50658	3.20332	2.0128	2.85161	2.53231	1.66623	1.58133	3.55241	1.12916	2.44405	2.92391	2.40902	2.65539	2.35127	2.05076	2.38114
Cell_0004	AMPKARt2	EAA 1.000000e-01 X + Insulin 10000 ng/ml	0.386277	0.586646	0.450783	0.654753	0.573636	0.558789	0.534107	0.627142	0.680353	0.602764	0.739615	0.56588	0.737556	0.678109	0.670762	0.660999	0.479422	0.456655	0.543927	0.628631	0.64664	0.591707	0.644363	0.672181	0.648747	0.723661	0.618379	0.620668	0.610952	0.581281	0.594471	0.630229	0.550528	0.545136	0.707356	0.613083	0.578108	0.497293	0.766509	0.521885	0.634041	0.5183	0.676579	0.633141	0.724065	0.697469	0.634463
Cell_0005	TFEB_TR	EAA 1.000000e-01 X + Insulin 10000 ng/ml	0.96928	1.49463	1.91646	1.59855	0.654405	1.26958	0.880836	1.16023	1.335	1.86682	0.844029	0.635358	1.12972	2.62472	2.38719	1.55496	1.49388	1.2627	1.59347	0.598393	0.742789	1.06859	1.64131	1.16938	1.04711	0.860675	1.53089	2.14887	1.34033	4.22007	0.760661	0.615402	2.49271	1.24905	1.52173	2.53796	1.26705	1.2301	1.46328	1.11548	1.18229	1.82268	1.35354	1.06294	0.910535	1.32771	1.11796
Cell_0005	FOXO_TR	EAA 1.000000e-01 X + Insulin 10000 ng/ml	0.942167	1.06263	2.53637	1.71295	1.83237	2.67704	1.58088	1.50008	3.01659	2.37455	1.5862	1.74264	1.62539	2.30714	2.14396	1.90277	1.40707	2.89279	1.22966	1.25542	2.38058	1.58591	1.643	2.37389	2.3551	1.33296	2.19457	2.21269	1.63137	2.75836	2.22375	1.50113	3.1872	1.9091	2.7449	2.56154	1.69263	1.74077	3.4693	1.04968	2.62618	2.92166	2.41191	2.99689	2.32589	2.02715	2.28871
Cell_0005	AMPKARt2	EAA 1.000000e-01 X + Insulin 10000 ng/ml	0.396682	0.574001	0.459826	0.655248	0.578662	0.550029	0.540398	0.6122	0.692947	0.614672	0.744838	0.577946	0.746428	0.697752	0.663397	0.676384	0.472817	0.448395	0.539046	0.635834	0.648304	0.596491	0.653944	0.670119	0.634791	0.72078	0.597809	0.608462	0.641181	0.584876	0.589514	0.63	0.549	0.54428	0.702053	0.625073	0.564664	0.495565	0.761537	0.532578	0.661508	0.516047	0.664082	0.637596	0.717227	0.714209	0.610773
Cell_0006	TFEB_TR	EAA 1.000000e-01 X + Insulin 10000 ng/ml	0.954737	1.39007	1.84512	1.8035	0.661831	1.26735	0.879473	1.12137	1.36738	1.79083	0.772431	0.624229	1.23673	2.33312	1.67735	1.33473	1.47675	1.28681	1.63067	0.593991	0.761619	0.944665	1.65492	1.23549	0.995888	0.902007	1.69135	2.21341	1.23746	4.29589	0.809352	0.588225	2.60045	1.37012	1.63896	2.90408	1.5518	1.36069	1.53294	1.03874	1.40386	1.76504	1.42694	1.06716	0.923152	1.38197	1.13405
Cell_0006	FOXO_TR	EAA 1.000000e-01 X + Insulin 10000 ng/ml	0.947236	1.08695	2.34727	1.69678	1.84909	2.68451	1.58523	1.45547	3.02497	2.31098	1.5587	1.76888	1.60064	2.28524	2.25821	1.96029	1.35837	2.95773	1.21322	1.26175	2.38562	1.56212	1.57895	2.59348	2.35514	1.3278	2.3951	2.17427	1.58259	2.80305	2.13969	1.39035	3.25656	1.84626	2.65782	2.52472	1.68512	2.29327	3.51953	1.05415	2.74225	2.95328	2.56466	3.01114	2.21324	2.04102	2.21944
Cell_0006	AMPKARt2	EAA 1.000000e-01 X + Insulin 10000 ng/ml	0.411079	0.566049	0.456976	0.650457	0.582523	0.538907	0.54776	0.609317	0.696307	0.628309	0.739014	0.587827	0.748683	0.707224	0.663752	0.672984	0.475596	0.457515	0.531569	0.626838	0.640141	0.585392	0.659283	0.667778	0.615626	0.717845	0.606055	0.601074	0.653174	0.601498	0.564763	0.630376	0.54747	0.523348	0.706727	0.622329	0.565592	0.501255	0.756821	0.521644	0.665043	0.503242	0.669173	0.620632	0.707034	0.737784	0.581124
Cell_0007	TFEB_TR	EAA 1.000000e-01 X + Insulin 10000 ng/ml	0.905788	1.33639	1.81254	1.74569	0.648302	1.29252	0.901616	0.983988	1.33904	1.5438	0.774022	0.618094	1.23799	2.43256	1.08326	1.21924	1.29853	1.32022	1.76562	0.598722	0.75842	1.05111	1.68256	1.19697	1.06331	0.89481	1.66364	2.46122	1.3952	3.80728	0.847558	0.572616	2.9666	1.57046	1.67279	2.29258	1.65848	1.55569	1.19647	0.969795	1.37461	1.55543	1.46603	1.02357	1.15305	1.40159	1.5232
Cell_0007	FOXO_TR	EAA 1.000000e-01 X + Insulin 10000 ng/ml	0.943912	1.13991	2.29386	1.74648	1.88372	2.88473	1.62199	1.42887	3.06178	2.36443	1.55439	1.79269	1.58986	2.23321	2.26714	2.08086	1.36028	2.96835	1.20299	1.23559	2.22954	1.46659	1.56011	2.61027	2.40197	1.36177	2.46812	2.20762	1.50658	2.83193	2.05311	1.50921	3.28635	1.83	2.62365	2.51984	1.62431	2.60068	3.48967	1.02985	2.66336	2.9615	2.68733	2.92945	2.18059	2.11929	2.22874
Cell_0007	AMPKARt2	EAA 1.000000e-01 X + Insulin 10000 ng/ml	0.419576	0.578522	0.454537	0.641897	0.569597	0.539642	0.540789	0.618291	0.693051	0.620269	0.731713	0.595447	0.742066	0.690538	0.670376	0.673831	0.477539	0.462033	0.515567	0.605458	0.629177	0.586275	0.653307	0.674831	0.615561	0.728872	0.619229	0.612444	0.64001	0.602874	0.551746	0.635348	0.5474	0.522678	0.707926	0.630762	0.586899	0.529299	0.76005	0.504764	0.647113	0.517433	0.673182	0.606876	0.641148	0.726918	0.57212
Cell_0008	TFEB_TR	EAA 1.000000e-01 X + Insulin 10000 ng/ml	0.851989	1.37948	1.97978	1.67673	0.667894	1.33813	0.911215	1.065	1.31364	1.55361	0.795286	0.619744	1.10865	2.88816	1.21677	1.30714	1.28137	1.34005	1.87366	0.575668	0.7534	1.17763	1.61539	1.16151	1.26581	0.83588	1.63705	2.69045	1.41525	3.72456	0.878159	0.616142	2.97646	1.64096	1.44262	1.84845	1.33114	1.60307	1.01612	0.958764	0.953296	1.00631	1.50289	1.01968	1.04912	1.43965	1.35393
Cell_0008	FOXO_TR	EAA 1.000000e-01 X + Insulin 10000 ng/ml	0.97898	1.14444	2.61829	1.76528	1.88259	2.98565	1.66029	1.40003	3.09842	2.37919	1.53702	1.73681	1.61442	2.23463	2.18839	2.15522	1.37794	2.95116	1.20801	1.20466	2.23954	1.31525	1.52128	2.64909	2.3806	1.34425	2.43035	2.26072	1.72428	2.76188	2.02978	1.97615	3.26313	1.84317	2.59559	2.54157	1.56788	2.58533	3.39219	0.989879	2.62279	1.10375	2.70745	2.99133	2.17245	2.11444	2.18813
Cell_0008	AMPKARt2	EAA 1.000000e-01 X + Insulin 10000 ng/ml	0.422083	0.584396	0.458931	0.637966	0.563223	0.54712	0.537022	0.614815	0.696961	0.609938	0.733755	0.601872	0.73856	0.689105	0.67622	0.67627	0.480692	0.451144	0.493091	0.617523	0.633577	0.595794	0.656411	0.677709	0.621868	0.731201	0.611629	0.620387	0.641375	0.590211	0.557285	0.652569	0.55084	0.531622	0.696322	0.629014	0.589762	0.537325	0.758397	0.504244	0.634442	0.727237	0.66651	0.608718	0.64835	0.708723	0.572898
Cell_0009	TFEB_TR	EAA 1.000000e-01 X + Insulin 10000 ng/ml	0.859613	1.33422	2.1154	1.69948	0.705798	1.36701	0.914337	1.22332	1.32162	1.62311	0.772011	0.639849	1.12354	2.96993	1.29117	1.32793	1.39384	1.35468	1.89067	0.554175	0.736457	1.0518	1.51156	1.20549	1.21137	0.852273	1.73379	2.61327	1.51434	4.0258	0.922846	0.695106	2.44713	1.58641	1.56209	2.03416	1.40418	1.58339	1.53025	1.02651	0.931622	0.871039	1.49284	1.06627	1.08301	1.37936	1.08964
Cell_0009	FOXO_TR	EAA 1.000000e-01 X + Insulin 10000 ng/ml	1.02748	1.09364	2.85111	1.65499	1.84354	2.9775	1.67925	1.40316	3.10337	2.31179	1.52861	1.73893	1.66694	2.26548	2.20272	2.21012	1.39518	2.94546	1.23578	1.21392	2.27212	1.20623	1.36145	2.74863	2.19097	1.45868	2.45588	2.34727	2.17923	2.82162	2.01356	2.40947	3.26048	1.85661	2.71385	2.54688	1.57748	2.62582	1.78515	1.04178	2.59769	1.11834	2.68474	3.07664	2.26083	2.06012	2.14905
Cell_0009	AMPKARt2	EAA 1.000000e-01 X + Insulin 10000 ng/ml	0.420931	0.575017	0.457608	0.644676	0.564209	0.544189	0.546899	0.604413	0.697662	0.615054	0.732639	0.612399	0.729321	0.708071	0.681945	0.682087	0.484148	0.452294	0.497466	0.627202	0.650799	0.596058	0.665273	0.664434	0.613913	0.72121	0.599237	0.613679	0.657164	0.587668	0.558096	0.673818	0.55934	0.526468	0.698728	0.609244	0.577512	0.501247	0.607087	0.503842	0.629217	0.72892	0.676232	0.615414	0.649243	0.720159	0.587229
Cell_0010	TFEB_TR	EAA 1.000000e-01 X + Insulin 10000 ng/ml	0.878663	1.26664	2.04428	1.58886	0.69876	1.35503	0.937789	1.18246	1.32418	1.52921	0.778505	0.634039	1.23899	2.56583	1.16657	1.39846	1.47557	1.37041	1.97449	0.551369	0.714392	0.931689	1.5164	1.24933	1.00535	0.939162	1.71885	2.53898	1.59179	4.01161	0.959873	0.691121	2.29025	1.48784	1.93864	0.70445	1.56382	1.61202	1.296	1.11048	1.39603	0.793238	1.37357	1.10363	1.13577	1.29273	1.40443
Cell_0010	FOXO_TR	EAA 1.000000e-01 X + Insulin 10000 ng/ml	1.01768	1.0767	2.70816	1.55026	1.81595	2.97542	1.71303	1.42574	3.0385	2.34291	1.52856	1.79258	1.6846	2.26011	2.25896	2.26272	1.42704	3.01418	1.24166	1.16032	2.16292	1.18266	1.43643	2.7055	2.05764	1.76049	2.4597	2.47506	2.37716	2.92304	1.98415	2.5805	3.28437	1.85854	2.8671	1.3814	1.58546	2.68152	1.90354	1.09371	2.56134	1.13014	2.65	3.03541	2.19752	2.07024	2.19119
Cell_0010	AMPKARt2	EAA 1.000000e-01 X + Insulin 10000 ng/ml	0.418088	0.57722	0.457308	0.658082	0.567796	0.540861	0.548728	0.597306	0.687357	0.60511	0.722209	0.617779	0.711855	0.720288	0.682131	0.699005	0.488543	0.462648	0.518893	0.595648	0.655782	0.593916	0.668566	0.653254	0.607602	0.723554	0.601767	0.609667	0.666096	0.591091	0.556034	0.675828	0.573143	0.531374	0.711445	0.486454	0.579951	0.479718	0.61261	0.506668	0.631328	0.736892	0.687027	0.606953	0.646962	0.737625	0.598442
Cell_0011	TFEB_TR	EAA 1.000000e-01 X + Insulin 10000 ng/ml	0.856346	1.32155	1.95805	1.5939	0.680186	1.34575	0.965269	1.05703	1.33029	1.62481	0.829912	0.606966	1.3116	2.36764	1.07245	1.52507	1.48313	1.37539	2.07586	0.536161	0.720929	0.899901	1.64069	1.24983	1.1408	0.943143	1.59396	2.78009	1.27961	3.91811	0.978669	0.600406	1.21478	1.42948	1.95754	0.702655	1.3218	1.63101	1.28107	1.05569	1.53944	0.733234	1.36683	1.09635	1.03828	1.3242	1.61889
Cell_0011	FOXO_TR	EAA 1.000000e-01 X + Insulin 10000 ng/ml	0.962807	1.11619	2.59082	1.57313	1.85448	2.99291	1.77141	1.40698	2.97354	2.44131	1.52363	1.79907	1.66254	2.2316	2.23983	2.30188	1.37246	3.06298	1.21154	1.1679	2.16774	1.17631	2.03066	2.65029	2.03868	1.98226	2.37743	2.45171	2.31317	2.81291	1.9412	2.59426	1.30531	1.90422	2.82976	1.37944	1.51851	2.68573	1.90446	1.04612	2.64242	1.1475	2.63435	2.94299	2.06894	2.10239	2.26688
Cell_0011	AMPKARt2	EAA 1.000000e-01 X + Insulin 10000 ng/ml	0.415942	0.588551	0.46036	0.651359	0.570972	0.548065	0.524933	0.587654	0.68288	0.577446	0.715457	0.60539	0.711934	0.720255	0.682537	0.692487	0.496741	0.463289	0.521573	0.584212	0.645902	0.601759	0.669921	0.654763	0.612577	0.735322	0.613168	0.611546	0.669363	0.591309	0.560123	0.662951	0.643444	0.551891	0.712427	0.481935	0.589754	0.4882	0.613772	0.512214	0.634568	0.742628	0.676019	0.594756	0.65256	0.735152	0.596621
Cell_0012	TFEB_TR	EAA 1.000000e-01 X + Insulin 10000 ng/ml	0.835077	1.33441	1.975	1.8137	0.718256	1.35481	1.00169	1.008	1.33252	1.96763	0.81093	0.613737	1.35392	2.55946	0.97702	1.41328	1.4481	1.37229	2.09346	0.522542	0.743378	0.813019	1.73913	1.2353	1.30503	0.854322	1.55158	2.88706	1.2859	0.99301	0.999405	0.578662	1.37159	1.49699	1.81203	0.686883	1.2741	1.64719	1.33923	0.963744	1.32303	0.728562	1.40117	1.08601	0.955278	1.34635	1.39436
Cell_0012	FOXO_TR	EAA 1.000000e-01 X + Insulin 10000 ng/ml	0.912893	1.12432	2.67044	1.6323	1.96095	3.07828	1.83076	1.38014	3.00592	2.40212	1.52601	1.83121	1.64715	2.27433	2.22325	2.34091	1.34214	3.01726	1.18725	1.60791	2.25644	1.12693	2.70336	2.65115	1.97704	2.03166	2.33284	2.28874	2.26332	1.95185	1.92583	2.58669	1.409	1.9822	2.79363	1.36557	1.46104	2.7497	1.88253	1.0001	2.7393	1.13565	2.57909	2.87191	2.14475	2.08981	2.33029
Cell_0012	AMPKARt2	EAA 1.000000e-01 X + Insulin 10000 ng/ml	0.41282	0.588276	0.456279	0.625595	0.561053	0.550898	0.502291	0.592573	0.687906	0.579453	0.720688	0.599464	0.724335	0.707306	0.690108	0.668143	0.506934	0.462203	0.520761	0.611957	0.639228	0.611039	0.674365	0.658906	0.620746	0.738811	0.625051	0.613796	0.665696	0.705937	0.562818	0.660102	0.639237	0.557791	0.70781	0.497748	0.592371	0.479207	0.623226	0.501356	0.635778	0.738142	0.67122	0.602509	0.660481	0.723781	0.601947
Cell_0013	TFEB_TR	EAA 1.000000e-01 X + Insulin 10000 ng/ml	0.841473	1.2315	1.98206	1.81862	0.77071	1.3716	1.08324	1.0508	1.3148	2.25082	0.785554	0.625982	1.31443	2.80237	1.18054	1.25454	1.42708	1.38225	2.15645	0.541631	0.752524	0.754852	1.71439	1.22902	1.13169	0.765751	1.04577	2.64142	1.58942	0.75262	1.01677	0.649119	1.49617	1.49816	1.84305	0.701195	1.45717	1.67844	1.38605	1.04591	1.30449	0.76645	1.30335	1.1045	1.09224	1.32335	1.20925
Cell_0013	FOXO_TR	EAA 1.000000e-01 X + Insulin 10000 ng/ml	0.88946	1.08888	2.67017	1.64319	2.07877	3.11857	1.88152	1.40549	3.06075	2.26998	1.52982	1.92339	1.63615	2.42449	2.25691	2.35086	1.59943	3.00062	1.17534	2.31345	2.17503	1.0477	3.07558	2.52741	1.92975	2.01407	2.38335	2.26125	2.1849	1.83003	1.95467	2.63774	1.4377	2.02603	2.88412	1.39608	1.47875	2.76783	1.87941	1.02049	2.76861	1.10435	2.45963	2.83973	2.25208	2.05884	2.40621
Cell_0013	AMPKARt2	EAA 1.000000e-01 X + Insulin 10000 ng/ml	0.405914	0.585444	0.455621	0.620347	0.563786	0.547821	0.502295	0.618463	0.690052	0.605258	0.726987	0.610827	0.719443	0.695623	0.692517	0.673057	0.515171	0.464241	0.529911	0.629647	0.637797	0.609677	0.688096	0.668483	0.629687	0.740139	0.583349	0.622023	0.661867	0.71044	0.562034	0.663705	0.65165	0.555805	0.70336	0.496732	0.589395	0.462726	0.64161	0.493237	0.641822	0.728461	0.679235	0.617219	0.658286	0.722643	0.61057
Cell_0014	TFEB_TR	EAA 1.000000e-01 X + Insulin 10000 ng/ml	0.851621	1.14436	1.90903	1.74369	0.759931	1.43393	1.19243	1.20116	1.34484	2.40143	0.874375	0.613539	1.27321	2.83962	1.42328	1.37191	1.42017	1.39824	2.18015	0.548286	0.737256	0.774085	1.63775	0.621487	1.08978	0.723073	1.00204	2.52768	1.23422	0.911935	1.01786	0.692744	1.3197	1.34362	1.77596	0.741825	1.4808	1.67015	1.36113	1.15199	1.37842	0.685498	1.4074	1.11537	1.23694	1.3145	1.27136
Cell_0014	FOXO_TR	EAA 1.000000e-01 X + Insulin 10000 ng/ml	0.888383	1.13229	2.52767	1.65346	2.10697	3.04024	1.90249	1.46597	3.05001	2.2083	1.6193	2.01247	1.61009	2.52472	2.26735	2.28275	1.93969	3.02056	1.1658	2.69338	2.04639	1.00392	3.32485	1.21128	1.94519	1.89592	2.45678	2.3711	2.13279	1.81941	1.98226	2.69526	1.42145	2.05645	2.86491	1.45634	1.5027	2.67312	1.82684	1.04946	2.77757	1.11932	2.40523	2.88776	2.21071	2.0839	2.48538
Cell_0014	AMPKARt2	EAA 1.000000e-01 X + Insulin 10000 ng/ml	0.395103	0.595378	0.463277	0.633319	0.597746	0.550169	0.494212	0.625629	0.689569	0.604888	0.724455	0.61325	0.709874	0.710843	0.693524	0.681402	0.517301	0.460975	0.530532	0.637016	0.641277	0.604319	0.695081	0.565041	0.629299	0.741371	0.600881	0.632238	0.670235	0.70838	0.560431	0.661957	0.661814	0.563519	0.701851	0.47458	0.591632	0.465474	0.64918	0.500109	0.642132	0.73096	0.677876	0.620476	0.66021	0.732325	0.613675
Cell_0015	TFEB_TR	EAA 1.000000e-01 X + Insulin 10000 ng/ml	0.861208	1.15839	1.83864	2.0129	0.705519	1.50637	1.30944	1.32419	1.39237	2.35561	0.904072	0.618811	1.33015	2.64216	1.15481	1.62044	1.43997	1.40182	1.98245	0.51363	1.5858	0.791094	1.59478	0.642578	1.21445	0.726355	0.998852	2.6546	0.919108	1.10062	1.01699	0.694823	1.13749	1.31908	1.61778	0.758192	1.60004	1.67164	1.18671	1.0993	1.2324	0.618365	1.59088	1.10544	1.19279	1.24014	1.44783
Cell_0015	FOXO_TR	EAA 1.000000e-01 X + Insulin 10000 ng/ml	0.881936	1.20689	2.43185	1.71673	2.00209	3.03644	1.89533	1.55595	3.07216	2.21708	1.83299	2.05556	1.58388	2.49093	2.21943	2.21033	2.02102	2.98392	1.17376	2.74559	2.57136	1.00895	3.47832	1.13159	1.91883	1.71379	2.39178	2.42802	2.14127	1.85745	1.98437	2.67222	1.42478	2.12174	2.72758	1.48247	1.5082	2.60729	1.7911	1.05772	2.71471	1.14981	2.39071	2.96894	2.16415	2.14701	2.55469
Cell_0015	AMPKARt2	EAA 1.000000e-01 X + Insulin 10000 ng/ml	0.38465	0.599698	0.460859	0.638606	0.612301	0.550908	0.470221	0.610633	0.688246	0.589945	0.725501	0.605803	0.717847	0.729868	0.701051	0.663249	0.508272	0.457762	0.530143	0.634651	0.682149	0.600657	0.678177	0.573551	0.621343	0.731636	0.60567	0.633079	0.679756	0.707791	0.558901	0.663292	0.661053	0.566288	0.708691	0.472994	0.607736	0.465521	0.642221	0.497816	0.633055	0.746488	0.676952	0.617791	0.673589	0.727744	0.621854
Cell_0016	TFEB_TR	EAA 1.000000e-01 X + Insulin 10000 ng/ml	0.891	1.30292	1.85577	2.40138	0.674848	1.48657	1.43849	1.26582	1.34632	2.24173	0.822783	0.645695	1.31012	2.58972	1.02295	1.82356	1.46838	0.96932	1.86025	0.498063	1.44933	0.784317	1.60834	0.640458	1.10252	0.717104	1.03396	2.74854	1.28738	1.01087	1.02023	0.706653	1.19299	1.44721	1.56954	0.755504	1.66644	1.72542	1.15961	1.0553	1.18868	0.832278	1.33452	1.10876	1.14415	1.17878	1.3971
Cell_0016	FOXO_TR	EAA 1.000000e-01 X + Insulin 10000 ng/ml	0.877365	1.14345	2.45844	1.79278	1.99293	3.08132	1.90342	1.69995	3.16657	2.24343	1.94228	2.03877	1.55995	2.50201	2.16292	2.22646	1.96422	1.80832	1.18381	2.83726	2.38093	0.982398	3.43341	1.13451	1.88977	1.69786	2.37234	2.42251	1.99259	1.83399	1.95447	2.63644	1.45698	2.2105	2.66417	1.49121	1.5148	2.60536	1.83459	1.06409	2.70996	1.13632	2.25878	2.99869	2.21306	2.07126	2.66835
Cell_0016	AMPKARt2	EAA 1.000000e-01 X + Insulin 10000 ng/ml	0.377355	0.58398	0.448629	0.643992	0.593817	0.549335	0.466576	0.622533	0.684029	0.593679	0.736951	0.601848	0.725922	0.719606	0.700394	0.65873	0.491746	0.541545	0.533591	0.606635	0.66877	0.587653	0.669786	0.579153	0.619613	0.725052	0.614431	0.630508	0.680337	0.715894	0.561279	0.665329	0.661868	0.571976	0.708286	0.485409	0.620296	0.45895	0.636089	0.490457	0.632484	0.748892	0.683525	0.610527	0.67714	0.709049	0.632332
Cell_0017	TFEB_TR	EAA 1.000000e-01 X + Insulin 10000 ng/ml	0.942242	1.40054	1.86831	2.74832	0.709663	1.42829	1.53004	1.27076	1.29643	2.43467	0.87569	0.663967	1.20117	2.70476	0.618606	1.86748	1.42291	1.16271	2.02734	0.51897	1.52465	0.777725	1.65276	0.639761	1.04461	0.706698	1.00724	2.92132	1.30401	0.821819	1.01717	0.713005	1.14974	1.46222	1.58411	0.760915	1.29924	1.73829	1.43603	1.10915	1.42098	1.08128	1.07202	1.11477	1.17763	1.1956	1.17705
Cell_0017	FOXO_TR	EAA 1.000000e-01 X + Insulin 10000 ng/ml	0.90304	1.18891	2.49202	1.80443	2.32038	2.96643	1.92237	1.84739	3.19814	2.26394	1.90264	2.06325	1.52983	2.57941	1.19144	2.22827	1.96599	1.77604	1.17412	2.88733	2.34604	0.922009	3.36859	1.14305	1.90049	1.83113	2.43655	2.38641	1.85646	1.78467	1.92989	2.64879	1.52317	2.2797	2.59852	1.50591	1.51232	2.5933	1.84386	1.09212	2.88666	1.12166	2.07327	2.96423	2.3236	1.81966	2.76564
Cell_0017	AMPKARt2	EAA 1.000000e-01 X + Insulin 10000 ng/ml	0.37298	0.580432	0.443888	0.645059	0.596522	0.551499	0.478737	0.662131	0.681686	0.598064	0.74363	0.599367	0.72001	0.710332	0.563084	0.669252	0.49154	0.545589	0.517783	0.591544	0.671979	0.569935	0.680839	0.591779	0.614421	0.737576	0.624312	0.635913	0.676003	0.720653	0.559045	0.661682	0.664903	0.587362	0.696591	0.481479	0.614781	0.460524	0.638813	0.49375	0.634309	0.742343	0.680934	0.597382	0.671159	0.715239	0.641504
Cell_0018	TFEB_TR	EAA 1.000000e-01 X + Insulin 10000 ng/ml	0.985386	1.30515	1.75675	3.17993	0.808938	1.43486	1.59033	1.52759	1.35773	2.78154	0.991704	0.5784	1.2152	2.49563	0.760602	1.69112	1.38555	1.19277	2.09535	0.524145	1.58935	0.784627	1.64227	0.652135	1.16237	0.711737	0.963441	3.1682	0.970338	0.795736	1.00943	0.688947	1.17177	1.44073	1.77735	0.770225	1.02137	1.7102	1.59918	1.10782	1.34378	1.05745	1.30814	1.10617	1.17369	1.12007	1.27158
Cell_0018	FOXO_TR	EAA 1.000000e-01 X + Insulin 10000 ng/ml	0.923248	1.66097	2.37713	1.75732	2.71796	2.8649	1.92943	1.9445	3.13706	2.26377	1.98948	1.74161	1.51969	2.55531	1.18128	2.17016	1.99995	1.80174	1.17579	2.77765	2.47952	0.924269	3.34633	1.1267	1.84115	1.83549	2.47735	2.31827	1.99733	1.78737	1.96609	2.67905	1.61468	2.2903	2.45581	1.49697	1.49879	2.56667	1.79741	1.14238	2.95562	1.12903	2.00786	2.93153	2.42523	1.64632	2.71215
Cell_0018	AMPKARt2	EAA 1.000000e-01 X + Insulin 10000 ng/ml	0.373916	0.605157	0.44815	0.627777	0.613274	0.547575	0.477472	0.681611	0.684018	0.595312	0.746255	0.678056	0.71534	0.723417	0.567921	0.656453	0.511766	0.556785	0.492802	0.602092	0.677395	0.571973	0.676712	0.602955	0.609309	0.746625	0.622936	0.644558	0.672338	0.713324	0.543286	0.663625	0.663952	0.578971	0.695583	0.474398	0.6082	0.457576	0.651096	0.500357	0.627313	0.75159	0.672211	0.589285	0.667102	0.731082	0.649816
Cell_0019	TFEB_TR	EAA 1.000000e-01 X + Insulin 10000 ng/ml	1.00313	1.2777	1.63638	3.19074	0.895004	1.45495	1.69298	1.62533	0.519948	2.89703	0.920113	0.547635	1.31207	2.26484	0.692023	1.56214	1.4331	1.17134	1.89627	0.512572	1.52024	0.754971	1.58469	0.659574	1.0863	0.61085	1.06488	3.12613	1.07893	1.06932	1.00531	0.67041	1.43029	1.5642	1.87313	0.779655	1.11933	1.74075	1.50821	1.07603	0.901286	0.943856	1.5619	1.12373	1.17157	1.04478	1.32683
Cell_0019	FOXO_TR	EAA 1.000000e-01 X + Insulin 10000 ng/ml	0.911348	2.17558	2.184	1.70412	2.81273	3.0167	1.92813	1.99887	1.92919	2.25471	2.14053	1.73446	1.53737	2.54794	1.1486	2.21547	2.018	1.83703	1.19583	2.69724	2.60932	0.976086	3.26935	1.14978	1.73003	1.69302	2.5123	2.29628	2.14425	1.84419	2.00785	2.71208	1.6674	2.23237	2.41255	1.45818	1.43352	2.59732	1.82432	1.19573	2.83502	1.11264	2.05486	3.01413	2.4075	1.6714	2.64121
Cell_0019	AMPKARt2	EAA 1.000000e-01 X + Insulin 10000 ng/ml	0.377671	0.623727	0.450747	0.617227	0.600342	0.548069	0.470455	0.671917	0.646299	0.605897	0.757539	0.683308	0.719212	0.722322	0.579011	0.643703	0.51488	0.568575	0.487293	0.593888	0.682964	0.588249	0.674142	0.604644	0.621127	0.738686	0.624793	0.647594	0.671678	0.708459	0.534234	0.668989	0.660762	0.561673	0.703312	0.484405	0.608013	0.448777	0.662636	0.508264	0.630729	0.754186	0.669082	0.59239	0.655148	0.713907	0.643757
Cell_0020	TFEB_TR	EAA 1.000000e-01 X + Insulin 10000 ng/ml	1.01605	1.39885	1.67233	2.41713	0.905976	0.781654	1.76353	1.39112	0.496675	2.77483	0.790064	0.544676	1.33866	2.43704	0.623778	1.57636	1.48418	1.25746	1.79982	0.51353	1.56006	0.686859	1.5718	0.641928	1.02407	0.536182	1.22633	2.80517	1.17999	1.344	1.00776	0.701313	1.41394	1.62664	1.62366	0.790032	1.11092	1.77496	1.54661	1.1253	0.981377	0.945725	1.51014	1.16166	1.24352	1.13451	1.14654
Cell_0020	FOXO_TR	EAA 1.000000e-01 X + Insulin 10000 ng/ml	0.907588	2.28017	2.18379	1.66035	2.76297	2.0845	1.88821	1.99073	1.88342	2.22398	2.12022	1.70109	1.53792	2.67475	1.13046	2.30975	2.01206	1.81601	1.1892	2.65495	2.60786	0.991858	3.21416	1.16375	1.69985	1.60769	2.52536	2.32049	2.11886	1.92302	1.99036	2.75343	1.67877	2.17618	2.5022	1.41684	1.3636	2.68858	1.90472	1.22921	2.80011	1.09424	2.09212	3.13722	2.24066	1.73995	2.75838
Cell_0020	AMPKARt2	EAA 1.000000e-01 X + Insulin 10000 ng/ml	0.380497	0.624804	0.449767	0.630444	0.586465	0.643829	0.472231	0.665083	0.646901	0.617543	0.762072	0.691045	0.722304	0.708456	0.588239	0.659808	0.498418	0.561649	0.495909	0.580887	0.693417	0.589588	0.698487	0.604343	0.629294	0.738129	0.628692	0.645726	0.666097	0.711843	0.544176	0.665663	0.660473	0.572922	0.70344	0.497954	0.605436	0.452408	0.655559	0.513543	0.64357	0.735677	0.670064	0.599154	0.641981	0.700475	0.627216
Cell_0021	TFEB_TR	EAA 1.000000e-01 X + Insulin 10000 ng/ml	1.04356	1.42617	1.4347	1.90458	0.893352	0.800165	1.73158	1.28238	0.500543	2.59488	0.778654	0.558608	1.30332	2.42472	0.710989	1.535	1.54372	1.29415	1.87171	0.516305	1.70142	0.695585	1.54247	0.610766	1.13915	0.662436	1.24491	2.60417	1.04181	1.24418	1.01495	0.746964	1.34391	1.48846	1.65977	0.792602	1.05854	1.7336	1.77078	1.1344	1.55307	1.05088	1.37808	1.15299	1.33054	1.16079	1.63227
Cell_0021	FOXO_TR	EAA 1.000000e-01 X + Insulin 10000 ng/ml	0.91912	2.23014	1.04801	1.64195	2.80184	1.91562	1.81967	1.97858	1.9073	2.16898	2.08523	1.68981	1.50901	2.70741	1.17663	2.26476	2.00924	1.78971	1.16289	2.59459	2.53686	0.97757	3.19746	1.16326	1.73973	1.6305	2.50954	2.27065	2.03986	1.91917	1.99374	2.87439	1.70696	2.2419	2.55153	1.37653	1.45079	2.71817	1.8994	1.22029	2.81459	1.1324	2.07625	3.11011	2.04749	1.78596	2.90385
Cell_0021	AMPKARt2	EAA 1.000000e-01 X + Insulin 10000 ng/ml	0.381657	0.625642	0.366559	0.645173	0.59578	0.649994	0.477191	0.672967	0.649605	0.61455	0.750012	0.685813	0.721676	0.716708	0.586451	0.672556	0.500103	0.550097	0.504555	0.592183	0.691586	0.578135	0.713073	0.610098	0.624072	0.743456	0.615724	0.64076	0.660188	0.710249	0.55111	0.661991	0.659795	0.57833	0.698859	0.488748	0.601112	0.457136	0.642135	0.508761	0.641571	0.730522	0.674181	0.60199	0.640517	0.71449	0.620995
Cell_0022	TFEB_TR	EAA 1.000000e-01 X + Insulin 10000 ng/ml	1.06965	1.46511	1.4521	2.42265	0.88633	0.814539	1.73685	1.34933	0.533904	2.55437	0.775114	0.566804	1.27766	2.07949	0.814021	1.54677	1.5429	1.16026	1.84027	0.510495	1.66593	0.768617	1.41457	0.623564	1.01991	0.658445	1.15238	2.75927	1.12808	1.05232	1.022	0.749601	1.64707	1.37005	1.75165	0.78667	1.27022	1.73614	1.90126	1.04784	1.6556	1.19731	1.22255	1.10699	1.37548	1.06381	2.31213
Cell_0022	FOXO_TR	EAA 1.000000e-01 X + Insulin 10000 ng/ml	0.917768	2.30275	1.04627	1.645	2.80314	1.80627	1.79685	2.05225	1.97958	2.1494	2.12428	1.74017	1.49583	2.63217	1.25614	2.1943	2.00672	1.82627	1.16302	2.63632	2.52036	0.962086	3.09721	1.30141	1.75375	1.70205	2.51077	2.18717	1.87338	1.80619	2.06083	3.04372	1.75424	2.39133	2.52758	1.31065	1.61685	2.69706	1.82287	1.18791	2.76818	1.17923	2.00079	3.0502	1.96495	1.84394	2.86637
Cell_0022	AMPKARt2	EAA 1.000000e-01 X + Insulin 10000 ng/ml	0.370982	0.623214	0.376197	0.646767	0.593089	0.681567	0.475759	0.679299	0.645925	0.611056	0.746169	0.682546	0.721669	0.722018	0.579491	0.666029	0.510957	0.556904	0.512398	0.592956	0.681802	0.57649	0.70673	0.625575	0.622783	0.729627	0.603462	0.636047	0.668655	0.707672	0.550769	0.664639	0.648726	0.562572	0.692826	0.464812	0.596477	0.441314	0.646298	0.508115	0.638289	0.737331	0.673095	0.605422	0.63914	0.70198	0.626793
Cell_0023	TFEB_TR	EAA 1.000000e-01 X + Insulin 10000 ng/ml	1.0726	1.60028	1.4893	2.80504	0.858099	0.80675	1.82854	1.29054	0.558134	2.52748	0.706454	0.575041	1.26771	2.11192	0.816016	1.62053	1.43132	1.13633	1.76213	0.509894	1.51509	0.762026	1.31794	0.670678	0.835345	0.553901	1.1142	2.97262	1.24302	1.0279	1.02419	0.737347	1.65805	1.36908	1.35357	0.788656	1.42483	1.80829	1.96892	1.03131	1.41771	1.28043	1.14876	1.09431	1.33647	1.07882	1.96328
Cell_0023	FOXO_TR	EAA 1.000000e-01 X + Insulin 10000 ng/ml	0.909601	2.34158	1.02536	1.63665	2.73577	1.77233	1.80535	2.02885	2.02914	2.17984	2.08051	1.81785	1.51709	2.69723	1.297	2.20002	1.98253	1.88264	1.17637	2.74292	2.58428	0.937871	2.95997	1.48903	1.73171	1.75417	2.48006	2.21259	1.71873	1.79594	2.05049	3.03091	1.82687	2.46158	2.50562	1.2232	1.6767	2.74688	1.81304	1.1422	2.78904	1.14971	1.90232	3.13642	1.9823	1.92041	2.80631
Cell_0023	AMPKARt2	EAA 1.000000e-01 X + Insulin 10000 ng/ml	0.352149	0.617369	0.401218	0.643352	0.578136	0.696258	0.470434	0.678183	0.643272	0.609433	0.749778	0.691317	0.726574	0.705314	0.575915	0.664657	0.511936	0.560032	0.521917	0.586049	0.681546	0.585751	0.707847	0.620865	0.620373	0.718863	0.61782	0.638978	0.674066	0.709754	0.560749	0.664789	0.636903	0.56298	0.687075	0.460832	0.597263	0.424837	0.657385	0.517491	0.651011	0.729008	0.664959	0.613328	0.638701	0.669678	0.638541
Cell_0024	TFEB_TR	EAA 1.000000e-01 X + Insulin 10000 ng/ml	1.06657	1.56583	1.49049	2.28945	0.846429	0.787909	1.86318	1.23112	0.560647	2.41263	0.67093	0.590651	1.19831	2.56169	0.70578	1.49402	1.45535	1.30641	1.75992	0.51853	1.48778	0.685717	1.3495	0.677009	1.05647	0.854233	1.13316	2.83318	1.11727	0.996014	1.0177	0.751205	1.48571	1.44715	1.56046	0.814575	1.35211	1.77574	2.0565	1.09574	1.45776	1.27367	1.3023	1.11442	1.24951	1.18773	1.63143
Cell_0024	FOXO_TR	EAA 1.000000e-01 X + Insulin 10000 ng/ml	0.905504	2.29612	1.02437	1.63483	2.72777	1.74297	1.79413	1.79941	2.01947	2.23666	2.07472	1.88162	1.55684	2.83342	1.30507	2.16667	2.01526	1.89297	1.1676	2.80803	2.58984	0.922176	2.96338	1.47973	1.7281	1.76268	2.42274	2.26427	1.80415	1.91762	1.96859	2.89052	1.92176	2.46044	2.51141	1.16356	1.65277	2.79218	1.89511	1.11803	2.85228	1.09227	2.01087	3.1928	1.9757	2.10028	2.85535
Cell_0024	AMPKARt2	EAA 1.000000e-01 X + Insulin 10000 ng/ml	0.35146	0.615628	0.410077	0.643669	0.573174	0.6911	0.475675	0.669438	0.651611	0.606006	0.738385	0.691921	0.735658	0.70173	0.575412	0.668549	0.525168	0.55363	0.527024	0.604253	0.675142	0.59024	0.711048	0.577071	0.621789	0.736535	0.641206	0.644809	0.660985	0.696213	0.573738	0.661916	0.645114	0.569609	0.690101	0.463292	0.609267	0.433511	0.664472	0.520217	0.658523	0.723091	0.676273	0.614466	0.642774	0.674371	0.64315
Cell_0025	TFEB_TR	EAA 1.000000e-01 X + Insulin 10000 ng/ml	1.07094	1.42058	1.48918	1.96477	0.853373	0.773555	1.81941	1.24885	0.570787	2.58863	0.678722	0.594758	1.13102	2.85929	0.595718	1.4035	1.53204	1.34737	1.71024	0.530602	1.55747	0.661655	1.37972	0.681086	1.27883	1.20856	1.11951	2.6168	1.02901	1.02607	1.00755	0.76307	2.03612	1.55881	2.33889	0.863741	1.24566	1.7122	2.099	1.11516	1.46856	1.2519	1.34965	1.09179	1.23341	1.28499	2.08796
Cell_0025	FOXO_TR	EAA 1.000000e-01 X + Insulin 10000 ng/ml	0.899084	2.25162	1.04878	1.6444	2.69838	1.70493	1.78285	1.68762	1.97317	2.31644	2.20846	1.90728	1.60666	2.88403	1.32274	2.12285	2.09671	1.85719	1.15551	2.86314	2.46295	0.9265	3.14765	1.40459	1.7254	1.78721	2.4281	2.23822	1.95275	1.91703	1.99738	2.89966	1.98514	2.45007	2.53575	1.16069	1.58684	2.79713	1.96859	1.33763	2.91226	1.10664	2.38133	3.09929	1.9124	2.34459	2.83079
Cell_0025	AMPKARt2	EAA 1.000000e-01 X + Insulin 10000 ng/ml	0.36714	0.613703	0.41425	0.643887	0.57232	0.697596	0.48739	0.647567	0.656816	0.608968	0.730898	0.688847	0.737798	0.705385	0.580866	0.667845	0.543987	0.565048	0.513351	0.608325	0.663319	0.584722	0.704015	0.554761	0.633058	0.757214	0.645641	0.645855	0.654245	0.671781	0.576046	0.662931	0.660063	0.562797	0.694714	0.437833	0.621888	0.444816	0.669747	0.520607	0.655722	0.731682	0.706999	0.604172	0.635682	0.695655	0.626776
Cell_0026	TFEB_TR	EAA 1.000000e-01 X + Insulin 10000 ng/ml	1.07792	1.37071	1.51378	2.12981	0.827158	0.765154	1.79254	1.17814	0.589676	2.80096	0.645317	0.586571	1.2093	2.77982	0.653162	1.57049	1.36123	1.2433	1.67786	0.551779	1.60686	0.724273	1.35182	0.747771	1.08207	1.07697	1.17665	2.64371	1.22346	1.15	1.00046	0.762558	2.60597	1.50097	2.06453	0.920592	1.09712	1.79916	2.34736	1.12099	1.30389	1.29686	1.18078	1.0276	1.2749	1.34069	2.03362
Cell_0026	FOXO_TR	EAA 1.000000e-01 X + Insulin 10000 ng/ml	0.893638	2.13066	1.05399	1.63922	2.62441	1.71189	1.77539	1.80743	1.95959	2.34962	2.24175	1.88539	1.62686	2.88554	1.32913	2.19179	2.10417	1.81843	1.16015	2.89504	2.40015	0.92796	3.39313	1.47836	1.71142	1.81371	2.47931	2.23363	1.93202	1.8402	1.96109	2.96188	2.0587	2.40941	2.52288	1.20833	1.67182	2.86379	2.01206	1.8938	3.09946	1.14306	2.6079	3.05125	1.86209	2.40236	2.69445
Cell_0026	AMPKARt2	EAA 1.000000e-01 X + Insulin 10000 ng/ml	0.375175	0.619568	0.433435	0.638231	0.587282	0.697084	0.487707	0.634022	0.653212	0.613866	0.736655	0.694137	0.729882	0.69486	0.592714	0.672903	0.543431	0.578051	0.497197	0.585888	0.665105	0.585249	0.694865	0.583991	0.628802	0.765118	0.641668	0.65136	0.663892	0.671519	0.56992	0.666674	0.654618	0.571017	0.687259	0.416232	0.633685	0.43974	0.662567	0.535839	0.655824	0.733814	0.720467	0.595593	0.629474	0.702531	0.620339
Cell_0027	TFEB_TR	EAA 1.000000e-01 X + Insulin 10000 ng/ml	1.09363	1.31629	1.51886	1.94363	0.829817	0.789195	1.79285	1.12117	0.603134	2.43895	0.618726	0.595541	1.27654	2.50805	0.764634	1.56181	1.268	1.22433	1.761	0.579515	1.66021	0.815161	1.37094	0.811146	0.908391	0.86212	1.33954	2.6471	1.44047	1.21526	0.992885	0.777192	2.22754	1.35989	1.29268	0.964559	1.09001	1.85569	2.73961	1.16164	1.37903	1.43026	1.24537	1.04806	1.28495	1.25543	0.561032
Cell_0027	FOXO_TR	EAA 1.000000e-01 X + Insulin 10000 ng/ml	0.906779	1.97831	1.04959	1.6633	2.68129	1.7532	1.77268	1.85352	2.00391	2.2832	2.18725	1.86689	1.59836	2.83779	1.30401	2.302	2.0698	1.81123	1.1411	2.87584	2.50852	0.935549	3.56347	1.55183	1.78318	1.81254	2.50548	2.20849	1.89885	1.88291	1.79045	2.95436	2.15002	2.42982	2.45758	1.27189	2.17701	2.86916	2.06181	2.41519	3.29713	1.11769	2.53498	3.10982	1.82886	2.28175	1.04331
Cell_0027	AMPKARt2	EAA 1.000000e-01 X + Insulin 10000 ng/ml	0.380185	0.631057	0.437554	0.637547	0.609804	0.679971	0.486394	0.64502	0.652099	0.617687	0.726377	0.701033	0.727623	0.696768	0.594327	0.678722	0.539901	0.566263	0.511063	0.589202	0.653768	0.599122	0.689273	0.605341	0.622381	0.760049	0.64973	0.660388	0.666859	0.686802	0.560123	0.668806	0.64106	0.602083	0.682289	0.425227	0.65066	0.437606	0.655811	0.549854	0.64886	0.729256	0.717618	0.596417	0.640918	0.70898	0.518489
Cell_0028	TFEB_TR	EAA 1.000000e-01 X + Insulin 10000 ng/ml	1.12664	1.29003	1.59335	1.75469	0.891498	0.82679	1.79819	1.17771	0.615806	2.07047	0.682466	0.618658	1.18161	2.40562	0.733611	1.36873	1.42465	1.26248	1.73742	0.590949	1.81187	0.818551	1.40746	0.842315	1.03358	0.851039	1.35829	2.59846	1.13105	1.31943	1.00594	0.788755	1.52279	1.43846	1.3348	0.994934	1.41429	1.75782	2.59854	1.17318	1.56626	1.42744	1.38154	0.657295	1.26218	1.09527	0.607753
Cell_0028	FOXO_TR	EAA 1.000000e-01 X + Insulin 10000 ng/ml	0.93566	2.00097	1.07198	1.71674	2.78675	1.78102	1.79444	1.80055	2.02337	2.23902	2.30788	1.89004	1.60012	2.83814	1.28526	2.28811	2.0407	1.83421	1.10337	2.81492	2.57256	0.969743	3.516	1.49884	1.81473	1.8127	2.45423	2.13467	1.93226	1.88664	2.16703	3.02513	2.09679	2.52528	2.41393	1.30727	2.75625	2.75496	2.05997	2.56342	3.25291	1.09709	2.5106	1.04312	1.7761	2.17783	1.15772
Cell_0028	AMPKARt2	EAA 1.000000e-01 X + Insulin 10000 ng/ml	0.393198	0.620177	0.431966	0.647978	0.600138	0.671042	0.493622	0.6475	0.652005	0.626149	0.709751	0.704697	0.734764	0.705988	0.584587	0.674041	0.536586	0.554358	0.534447	0.600849	0.619132	0.601902	0.692664	0.603656	0.636444	0.735162	0.650312	0.65866	0.6576	0.684369	0.564193	0.668394	0.642006	0.62275	0.693913	0.419262	0.655854	0.438371	0.669376	0.53943	0.640064	0.729471	0.71809	0.460508	0.644976	0.701715	0.453537
Cell_0029	TFEB_TR	EAA 1.000000e-01 X + Insulin 10000 ng/ml	1.14657	1.35457	1.75797	2.03393	0.912044	0.810864	1.8177	1.18943	0.623471	2.24817	0.761431	0.62635	1.12949	2.51889	0.693188	1.51769	1.38677	1.32034	1.59333	0.585665	2.00136	0.712588	1.37577	0.908561	1.142	0.814754	1.29587	2.75288	0.907966	1.35743	1.07181	0.76427	1.29925	1.51817	1.5393	1.03391	1.55585	1.71332	2.21042	1.15899	1.09593	1.17339	1.14688	0.687711	1.25376	1.02356	0.569067
Cell_0029	FOXO_TR	EAA 1.000000e-01 X + Insulin 10000 ng/ml	0.937731	2.14096	1.09582	1.71616	2.74779	1.75943	1.79877	1.83844	1.98192	2.29011	2.49118	1.91159	1.62166	2.96805	1.29991	2.21887	2.01195	1.88158	1.12373	2.74245	2.45603	0.979224	3.26451	1.44188	1.62453	1.78348	2.37693	2.35845	1.88657	1.76335	3.18093	3.07625	1.95027	2.53206	2.38641	1.33898	2.92257	2.72103	2.02287	2.49861	2.4032	1.11696	2.59987	1.09162	1.71517	2.06526	1.1289
Cell_0029	AMPKARt2	EAA 1.000000e-01 X + Insulin 10000 ng/ml	0.402968	0.604392	0.442413	0.653586	0.586315	0.673257	0.491948	0.635058	0.652492	0.627719	0.713863	0.693821	0.735722	0.69396	0.589342	0.675593	0.523023	0.561611	0.53464	0.588319	0.607983	0.585372	0.702613	0.610237	0.640298	0.714696	0.633153	0.65968	0.651778	0.670917	0.586196	0.668598	0.647747	0.618951	0.697814	0.385872	0.639487	0.440359	0.676458	0.523631	0.652139	0.728656	0.714183	0.429987	0.637902	0.673626	0.512724
Cell_0030	TFEB_TR	EAA 1.000000e-01 X + Insulin 10000 ng/ml	1.14166	1.3251	1.84069	2.101	0.908837	0.779343	1.83142	1.12235	0.623101	2.38588	0.764595	0.630441	1.20197	2.5321	0.766964	1.75316	1.26239	1.39569	1.56894	0.588674	2.02354	0.681234	1.32272	1.00418	1.13558	0.76276	1.41696	2.96165	1.8294	1.17935	1.15181	0.739246	1.68301	1.36906	1.34741	1.07571	1.22578	1.20389	2.43599	1.16191	1.36717	1.0661	0.931879	0.69418	1.2992	1.00949	0.552534
Cell_0030	FOXO_TR	EAA 1.000000e-01 X + Insulin 10000 ng/ml	0.916205	2.21561	1.1026	1.7107	2.70261	1.72443	1.7721	1.87328	1.97594	2.26784	2.50827	1.90914	1.58383	2.98222	1.32667	2.29887	2.08438	1.91803	1.13704	2.77245	2.28529	0.929897	3.16458	1.43813	1.66131	1.79595	2.43194	2.90106	1.80405	1.72662	3.76173	3.00914	1.95847	2.48316	2.3127	1.40555	2.89231	2.45441	2.06874	2.51165	2.46111	1.09011	2.54673	1.10599	1.67995	2.00448	1.12834
Cell_0030	AMPKARt2	EAA 1.000000e-01 X + Insulin 10000 ng/ml	0.407707	0.619366	0.452857	0.64963	0.602699	0.686411	0.483333	0.642601	0.650907	0.620103	0.721351	0.675588	0.730249	0.684555	0.605633	0.68921	0.525825	0.56948	0.53084	0.593462	0.624402	0.579311	0.710264	0.6125	0.643056	0.715686	0.639477	0.680756	0.656675	0.665948	0.586326	0.674285	0.648927	0.608126	0.685819	0.375898	0.619837	0.590079	0.66937	0.527792	0.653361	0.726784	0.711711	0.424344	0.647435	0.661062	0.579159
Cell_0031	TFEB_TR	EAA 1.000000e-01 X + Insulin 10000 ng/ml	1.13864	1.26256	1.87597	1.95532	0.947152	0.784662	1.81222	1.097	0.639531	2.20427	0.72079	0.661883	1.26402	2.52096	0.88361	1.60996	1.41854	1.35201	1.59139	0.59677	1.97446	0.771905	1.26568	1.07416	1.04703	0.753146	1.46932	2.92778	2.58539	1.05089	1.18248	0.768881	2.09387	1.24635	1.0152	1.09306	1.04313	0.71905	2.75458	1.12827	1.23099	1.19859	1.01686	0.658762	1.2979	0.995898	0.623457
Cell_0031	FOXO_TR	EAA 1.000000e-01 X + Insulin 10000 ng/ml	0.927816	2.25088	1.12607	1.78963	2.75934	1.74126	1.7617	1.80898	2.03345	2.14465	2.48163	1.89749	1.59829	2.84988	1.33516	2.32617	2.18295	1.87878	1.07222	2.86918	2.16104	0.927801	3.36007	1.44431	2.25027	1.89339	2.5318	3.24912	1.80295	1.76096	3.63561	3.09486	2.05576	2.47876	1.21466	1.46204	2.93045	2.46284	2.11198	2.55775	2.22917	1.04654	2.41271	1.07309	1.70478	2.06129	1.22314
Cell_0031	AMPKARt2	EAA 1.000000e-01 X + Insulin 10000 ng/ml	0.411598	0.632104	0.457126	0.649304	0.614363	0.692893	0.485339	0.656064	0.626197	0.623098	0.714534	0.676579	0.732435	0.68851	0.612036	0.687759	0.540704	0.570478	0.541658	0.617067	0.629689	0.591898	0.718647	0.608901	0.671615	0.720073	0.66939	0.701084	0.66639	0.66972	0.554146	0.682074	0.651304	0.599803	0.63293	0.394314	0.610983	0.586392	0.676425	0.533856	0.633985	0.731592	0.717549	0.433542	0.661642	0.663775	0.569381
Cell_0032	TFEB_TR	EAA 1.000000e-01 X + Insulin 10000 ng/ml	1.13846	1.35036	1.91882	2.05639	0.9435	0.761289	1.80866	1.11333	0.707589	2.0916	0.719044	0.723605	1.33289	2.69643	1.04269	1.55079	1.53314	1.26887	1.57098	0.586007	2.11869	0.785642	1.22418	1.1123	0.840941	0.721782	1.30484	2.73634	1.79905	1.03707	1.17356	1.30272	1.74942	1.24708	1.08997	1.0956	1.3321	0.788446	2.50225	1.06887	1.12115	1.09727	1.13168	0.591481	1.17058	0.986343	0.624619
Cell_0032	FOXO_TR	EAA 1.000000e-01 X + Insulin 10000 ng/ml	0.933535	2.26435	1.15948	1.84227	2.75103	1.75711	1.76422	1.77382	2.03274	2.15007	2.51279	1.86726	1.6469	2.85922	1.33322	2.08238	2.12208	1.81128	1.18665	2.83362	2.05518	1.04876	3.51424	1.47299	2.72774	1.90283	2.44647	3.30335	1.85258	1.69689	3.57567	1.79387	2.06749	2.4609	1.25388	1.48286	2.93419	2.46797	2.02957	2.47019	1.84437	1.09616	2.41166	1.01397	1.75593	1.97821	1.19984
Cell_0032	AMPKARt2	EAA 1.000000e-01 X + Insulin 10000 ng/ml	0.394748	0.616001	0.453058	0.654001	0.62235	0.64544	0.484925	0.650035	0.59267	0.6322	0.699727	0.678268	0.73751	0.681317	0.618804	0.67064	0.530286	0.574077	0.553792	0.613952	0.624943	0.600032	0.72396	0.619029	0.676415	0.726856	0.671667	0.696836	0.670352	0.675347	0.53399	0.56638	0.649122	0.589092	0.649547	0.401555	0.616528	0.595292	0.682371	0.521059	0.59757	0.737344	0.709982	0.434818	0.65865	0.652088	0.553236
Cell_0033	TFEB_TR	EAA 1.000000e-01 X + Insulin 10000 ng/ml	1.1171	1.42261	1.90954	1.97156	0.886856	0.723976	1.8837	1.11004	0.819642	2.11714	0.798051	0.801133	1.40326	2.83283	1.10538	1.80323	1.46777	1.3077	1.62518	0.563404	2.2802	0.724735	1.24933	1.12844	0.937624	0.730007	1.28204	2.65419	1.5695	1.14655	1.15114	1.16514	1.41155	1.25623	0.980579	1.10865	1.61612	1.10777	2.21783	1.08985	1.23542	0.856565	1.25727	0.562374	1.14282	1.01606	0.528808
Cell_0033	FOXO_TR	EAA 1.000000e-01 X + Insulin 10000 ng/ml	0.894886	2.18854	1.17342	1.81694	2.68602	1.76645	1.77715	1.80896	1.91581	2.20311	2.48685	1.84191	1.53783	2.955	1.33426	2.03428	2.05131	1.81478	1.63535	2.70668	1.9641	1.17766	3.50676	1.53958	2.72999	1.89492	2.31812	3.32488	2.70563	1.64652	3.67239	1.81307	2.09261	2.44256	1.27007	1.50853	2.92366	2.5168	1.97502	2.35991	1.70728	1.18397	2.43851	1.00371	1.75087	1.89151	1.07041
Cell_0033	AMPKARt2	EAA 1.000000e-01 X + Insulin 10000 ng/ml	0.366887	0.607044	0.431143	0.657471	0.650345	0.579017	0.475687	0.648628	0.597201	0.629381	0.688398	0.664095	0.732919	0.677138	0.622578	0.674425	0.519702	0.573196	0.55934	0.596757	0.620948	0.599347	0.722042	0.619039	0.643045	0.730382	0.656655	0.675337	0.601927	0.675192	0.539824	0.591568	0.644185	0.583507	0.652886	0.394183	0.632832	0.601303	0.671539	0.508499	0.584875	0.734383	0.695022	0.419269	0.655983	0.639929	0.562482
Cell_0034	TFEB_TR	EAA 1.000000e-01 X + Insulin 10000 ng/ml	1.07366	1.3463	2.13152	1.79649	0.878958	0.776475	1.95946	1.12839	0.903303	2.16216	0.845841	0.870756	1.39026	2.8613	0.932863	1.78399	1.53176	1.32295	1.69657	0.562181	2.22825	0.709548	1.23625	1.12641	1.44021	0.927815	1.37904	2.6258	1.64579	1.46194	1.11393	1.20388	2.25533	1.27556	0.919003	1.13969	1.59215	1.05356	2.15291	1.13851	1.19086	0.938	1.29183	0.598091	1.27621	1.11683	0.547422
Cell_0034	FOXO_TR	EAA 1.000000e-01 X + Insulin 10000 ng/ml	0.902777	2.10018	1.19491	1.88782	2.73147	1.8665	1.76922	1.82758	1.79872	2.12145	2.49705	1.86734	1.61532	2.99965	1.30458	2.40207	2.10753	1.84239	2.08246	2.68557	1.93193	1.22133	3.43531	1.60057	2.78477	1.33493	2.37435	3.29974	2.60272	1.70071	3.5552	1.81428	2.16469	2.42409	1.283	1.54794	2.87214	2.59175	2.05306	2.36402	1.80434	1.21086	2.34022	1.05959	1.73394	2.15193	1.08166
Cell_0034	AMPKARt2	EAA 1.000000e-01 X + Insulin 10000 ng/ml	0.38234	0.614767	0.418498	0.661628	0.659589	0.574084	0.47833	0.6584	0.627033	0.628935	0.695712	0.66705	0.730751	0.691538	0.608283	0.696823	0.53723	0.565897	0.56134	0.586737	0.612385	0.597992	0.724867	0.604887	0.629567	0.507388	0.661213	0.661159	0.60577	0.670223	0.554164	0.597563	0.650761	0.589944	0.656992	0.387108	0.640679	0.603461	0.671279	0.516047	0.589349	0.726562	0.696417	0.413238	0.664764	0.657248	0.567545
Cell_0035	TFEB_TR	EAA 1.000000e-01 X + Insulin 10000 ng/ml	1.04767	1.2428	2.57284	2.04183	0.889975	0.859798	1.89818	1.20817	0.928913	2.20122	0.778814	0.935491	1.38131	2.83698	0.876856	1.51228	1.62669	1.29025	1.76993	0.587301	2.11349	0.642771	1.30162	1.10748	1.5222	1.37584	1.3466	2.58407	1.75559	1.45606	1.08465	1.38389	3.11193	1.28192	0.983862	1.1895	1.431	0.786187	2.11489	1.11111	1.03868	1.1556	1.07668	0.628067	1.30492	1.12917	0.653476
Cell_0035	FOXO_TR	EAA 1.000000e-01 X + Insulin 10000 ng/ml	0.915087	2.10642	1.22903	1.99576	2.78522	1.98066	1.68834	1.8207	1.7807	2.28976	2.67714	1.91473	2.21353	3.10129	1.2525	2.64982	2.15861	1.81111	2.30311	2.76194	1.93108	1.22837	1.76248	1.59129	2.96405	1.26839	2.50098	3.2423	2.65347	1.68254	3.3482	1.78711	2.15666	2.32835	1.30593	1.59462	2.65374	2.60549	2.11688	2.37515	1.83426	1.21352	2.26324	1.0927	1.77102	2.2992	1.18124
Cell_0035	AMPKARt2	EAA 1.000000e-01 X + Insulin 10000 ng/ml	0.419611	0.615881	0.424512	0.664128	0.642287	0.600381	0.486535	0.660922	0.630741	0.648449	0.711033	0.682665	0.744506	0.695559	0.611044	0.698531	0.543848	0.57059	0.560013	0.582895	0.612985	0.595152	0.646863	0.612013	0.636229	0.510213	0.671115	0.666718	0.599699	0.669612	0.57307	0.602923	0.657505	0.592029	0.668915	0.374663	0.634938	0.60963	0.679252	0.525672	0.577645	0.726118	0.698701	0.439119	0.669886	0.694358	0.558343
Cell_0036	TFEB_TR	EAA 1.000000e-01 X + Insulin 10000 ng/ml	1.07128	1.21127	2.67078	2.09818	0.860388	0.855288	1.78023	1.2746	0.951072	2.07965	0.740904	1.00362	1.42865	2.64319	1.06809	1.55704	1.57012	1.35866	1.89956	1.082	2.04758	0.551735	1.12908	1.078	1.24776	1.237	1.30604	2.70486	1.84356	0.979522	1.07524	1.49744	2.52818	1.25933	0.994907	1.2475	1.31124	0.865187	2.21677	1.08734	1.07922	1.1896	0.969814	0.637902	1.25314	0.97995	0.628565
Cell_0036	FOXO_TR	EAA 1.000000e-01 X + Insulin 10000 ng/ml	0.866786	2.16688	1.23255	1.92787	2.71412	2.01196	1.73096	1.82878	1.78799	2.91191	2.76101	1.92614	2.7103	3.17418	1.25918	2.68907	2.21112	1.76416	2.43395	3.02233	1.90453	1.2232	1.79976	1.49207	2.92688	1.19941	2.56742	3.28189	2.58797	1.56653	3.2293	1.74397	2.16016	2.24636	1.3216	1.65611	2.4936	2.54701	2.12732	2.34993	1.82471	1.23147	2.29154	1.08781	1.76119	2.03083	1.16783
Cell_0036	AMPKARt2	EAA 1.000000e-01 X + Insulin 10000 ng/ml	0.408389	0.612695	0.427056	0.65484	0.645578	0.601235	0.489811	0.663996	0.612277	0.670669	0.704001	0.678554	0.757587	0.681454	0.636371	0.681789	0.531728	0.577019	0.552661	0.708383	0.624521	0.597267	0.663482	0.620482	0.62676	0.514603	0.67677	0.673737	0.603021	0.67148	0.582483	0.599869	0.652356	0.580912	0.672156	0.357007	0.638624	0.607733	0.678896	0.518096	0.573288	0.736553	0.689899	0.445934	0.669596	0.710592	0.549253
Cell_0037	TFEB_TR	EAA 1.000000e-01 X + Insulin 10000 ng/ml	1.11635	1.27056	2.6558	1.84246	0.840003	0.802045	1.81769	1.26999	0.967555	1.91001	0.799082	1.01622	1.4126	2.62595	1.09933	1.74876	1.04001	1.38189	1.88258	1.12213	2.10527	0.641274	1.10801	1.06821	1.58273	1.28448	1.25729	2.77345	1.8358	0.853351	1.06029	1.37679	1.79228	1.25627	1.02114	1.30034	1.33772	1.12544	2.24068	1.09482	1.18834	1.07522	1.16308	0.6547	1.27692	0.914171	0.559661
Cell_0037	FOXO_TR	EAA 1.000000e-01 X + Insulin 10000 ng/ml	1.04638	2.18471	1.21969	1.99488	2.66006	2.03744	2.06534	1.83747	1.73654	3.42335	2.66028	1.91605	2.67021	3.12796	1.3265	2.82294	1.61796	1.78527	2.49809	2.86177	1.88433	1.21	1.73951	1.37834	2.82544	1.19805	2.58761	3.3066	2.49508	1.53336	3.18124	1.71473	2.32058	2.27274	1.30584	1.71164	2.53311	2.48687	2.17797	2.35498	1.88114	1.23186	2.29572	1.08451	1.69325	1.881	1.11643
Cell_0037	AMPKARt2	EAA 1.000000e-01 X + Insulin 10000 ng/ml	0.396382	0.613886	0.436096	0.643843	0.658231	0.59644	0.511265	0.670511	0.603284	0.677764	0.68966	0.674097	0.754553	0.677616	0.627962	0.675612	0.433497	0.56665	0.544476	0.724453	0.622927	0.60512	0.651903	0.602677	0.61561	0.506871	0.682442	0.66669	0.609685	0.662961	0.576155	0.583178	0.648929	0.574285	0.667313	0.357664	0.655325	0.598797	0.684055	0.519259	0.584423	0.74506	0.686512	0.404239	0.674004	0.688436	0.553294
Cell_0038	TFEB_TR	EAA 1.000000e-01 X + Insulin 10000 ng/ml	1.16896	1.34978	3.01838	2.13735	0.843328	0.775438	1.95812	1.22971	0.942644	2.04064	0.800981	0.981011	1.32899	0.564593	1.06366	1.61404	0.970429	1.32367	1.79409	1.16391	2.27739	0.806427	1.24041	1.0826	1.99219	1.70509	1.14982	2.57819	1.74188	1.12194	1.04051	1.17741	2.26578	1.24339	1.08581	1.33882	1.40444	1.11218	2.09064	1.04347	1.21785	0.996872	1.36279	0.640395	1.31479	0.999179	0.607658
Cell_0038	FOXO_TR	EAA 1.000000e-01 X + Insulin 10000 ng/ml	1.55018	2.12843	1.23086	2.53981	2.70354	2.06167	2.36185	1.8035	1.69147	3.54835	2.74551	1.93743	2.59686	2.10035	1.37185	2.84206	1.61542	1.87155	2.46536	2.66717	1.88566	1.21632	1.63665	1.32259	2.79403	1.22433	2.55791	3.23871	2.54402	1.56876	3.2289	1.72511	2.50553	2.30627	1.26746	1.73817	2.51836	2.45475	2.18156	2.34167	1.88292	1.22231	2.33984	1.05092	1.72932	1.91652	1.11184
Cell_0038	AMPKARt2	EAA 1.000000e-01 X + Insulin 10000 ng/ml	0.443619	0.620278	0.449521	0.656289	0.64646	0.591066	0.537815	0.66882	0.604064	0.677058	0.699612	0.686848	0.747765	0.628214	0.598215	0.683671	0.457335	0.567326	0.547788	0.711058	0.613885	0.605517	0.652402	0.595182	0.627649	0.494889	0.677407	0.66092	0.605821	0.648914	0.580583	0.587418	0.646598	0.579948	0.66868	0.380941	0.658306	0.599282	0.687115	0.546902	0.583405	0.739034	0.689045	0.385157	0.67727	0.657994	0.561218
Cell_0039	TFEB_TR	EAA 1.000000e-01 X + Insulin 10000 ng/ml	1.2679	1.36525	3.19128	2.61995	0.839688	0.759672	1.99246	1.15227	0.930733	2.18428	1.23098	0.996308	1.28651	0.602771	1.1675	1.49584	0.709862	1.40875	1.92745	1.24053	2.19698	0.807839	1.20394	1.08371	1.61254	1.53169	1.21639	2.55988	1.62614	1.09019	1.02128	1.30898	2.67117	1.17465	0.999858	1.33452	1.3131	1.01696	2.14188	1.01507	1.22376	1.23008	1.34948	0.628215	1.35412	1.04503	0.641198
Cell_0039	FOXO_TR	EAA 1.000000e-01 X + Insulin 10000 ng/ml	1.91374	2.10454	1.24622	3.09033	2.75848	2.04671	2.33402	1.72442	1.7026	3.56137	1.3976	1.9719	2.67073	2.1221	1.37681	2.61199	1.59931	1.92572	2.46997	2.56568	1.84836	1.20423	1.65665	1.28803	2.70075	1.20641	2.52517	3.24162	2.51486	1.57499	3.28788	1.78181	2.56095	2.27196	1.2488	1.70865	2.47893	2.43048	2.08113	2.26475	1.82293	1.22938	2.48358	1.02897	1.79995	1.85814	1.05653
Cell_0039	AMPKARt2	EAA 1.000000e-01 X + Insulin 10000 ng/ml	0.466382	0.626939	0.443389	0.679838	0.636205	0.574615	0.526776	0.667783	0.610171	0.673649	0.549221	0.695606	0.75049	0.619383	0.60106	0.697533	0.493185	0.587737	0.55386	0.71271	0.616601	0.604337	0.669197	0.607742	0.645615	0.501572	0.674044	0.66276	0.608896	0.656853	0.594188	0.602157	0.640428	0.582116	0.668426	0.387766	0.642375	0.606947	0.6771	0.556665	0.57554	0.725405	0.68683	0.409474	0.672943	0.64535	0.557151
Cell_0040	TFEB_TR	EAA 1.000000e-01 X + Insulin 10000 ng/ml	1.38047	1.29132	2.91504	2.38109	0.837725	0.734785	1.96624	1.00654	0.959263	2.10837	1.36169	1.00837	1.28782	0.597609	1.09832	1.75992	0.573678	1.45711	2.03324	1.26745	1.88794	0.711444	0.997125	1.07479	1.26785	0.94168	1.34191	2.81432	1.5037	0.951825	0.984605	1.60569	2.14662	1.12663	0.938115	1.29797	1.30687	1.21871	2.18507	1.09963	1.25132	1.54659	1.09085	0.683383	1.34955	1.00934	0.602297
Cell_0040	FOXO_TR	EAA 1.000000e-01 X + Insulin 10000 ng/ml	1.93761	2.18084	1.24343	3.14848	2.81132	2.03352	2.22121	1.48692	1.6912	3.48421	1.37529	1.93621	2.6181	2.18182	1.38508	2.40016	1.52464	1.90718	2.50937	2.55774	1.78123	1.16389	1.74983	1.2638	2.61383	1.22638	2.51582	3.3383	2.41224	1.5939	3.21541	1.84572	2.54006	2.24659	1.24908	1.62429	2.62882	2.45579	2.06786	2.18719	1.86033	1.22196	2.5226	1.08405	1.71959	1.90399	0.993335
Cell_0040	AMPKARt2	EAA 1.000000e-01 X + Insulin 10000 ng/ml	0.419845	0.621342	0.432208	0.68005	0.650693	0.578249	0.501101	0.612562	0.617933	0.668412	0.55311	0.696708	0.755267	0.633516	0.617918	0.703549	0.505157	0.593512	0.552058	0.729125	0.622348	0.609514	0.665462	0.608886	0.638671	0.518623	0.68299	0.659377	0.614878	0.680186	0.591152	0.592873	0.648198	0.576966	0.66222	0.367643	0.63411	0.614197	0.677738	0.531973	0.568689	0.719081	0.680636	0.417785	0.67311	0.638406	0.543431
Cell_0041	TFEB_TR	EAA 1.000000e-01 X + Insulin 10000 ng/ml	1.42463	1.11942	2.82593	1.84833	1.11152	0.721592	1.98953	0.873512	0.958162	2.33177	1.41326	0.943694	1.28562	0.569379	1.09426	1.73619	0.747413	1.29179	1.90627	1.18424	1.80711	0.682055	1.00928	1.07001	1.33356	1.09358	1.23084	2.88966	1.3729	1.06874	0.952283	1.46794	1.86661	1.17442	1.07828	1.31266	1.44035	1.46911	2.07006	1.16814	1.3289	1.43407	0.823659	0.702687	1.28206	0.964635	0.638131
Cell_0041	FOXO_TR	EAA 1.000000e-01 X + Insulin 10000 ng/ml	1.89907	2.19729	1.2401	3.02364	1.37232	2.01138	2.23688	1.63209	1.6289	3.32152	1.3265	1.83135	2.56962	2.13549	1.40146	2.29568	1.49784	1.8918	2.42415	2.53051	1.73035	1.16641	1.75209	1.30713	2.57081	1.31701	2.4446	3.36307	2.39698	1.59985	3.08977	1.83288	2.53808	2.28484	1.24134	1.58422	2.74381	2.5945	2.12878	2.22945	1.99919	1.20945	2.4767	1.0946	1.63453	2.00279	1.03936
Cell_0041	AMPKARt2	EAA 1.000000e-01 X + Insulin 10000 ng/ml	0.387023	0.618872	0.425977	0.66569	0.522037	0.601619	0.499401	0.61524	0.614159	0.667707	0.560557	0.703867	0.750866	0.651854	0.621172	0.69161	0.482834	0.591736	0.561444	0.717982	0.624847	0.6076	0.659737	0.605639	0.619309	0.518962	0.68135	0.655282	0.598494	0.677161	0.588055	0.5854	0.66451	0.578937	0.658321	0.363966	0.644352	0.615852	0.687008	0.521997	0.558946	0.724587	0.671017	0.416295	0.681407	0.627385	0.536229
Cell_0042	TFEB_TR	EAA 1.000000e-01 X + Insulin 10000 ng/ml	1.4192	0.504311	2.92316	1.82357	1.60779	0.715874	1.97134	0.865881	0.922409	2.60783	1.44871	0.911114	1.30511	0.535794	1.40917	1.32941	0.872166	1.27437	1.81666	1.14371	1.86994	0.702945	1.14028	1.02556	1.13014	1.67356	1.10546	2.79964	1.47111	1.05899	0.950513	1.29132	2.00989	1.22844	1.10825	1.35577	1.3288	1.22007	2.19069	1.161	1.37902	1.24743	0.872679	0.651976	1.34788	0.968864	0.725894
Cell_0042	FOXO_TR	EAA 1.000000e-01 X + Insulin 10000 ng/ml	1.88614	1.09349	1.24556	3.07388	1.42188	1.98823	2.28134	1.61436	1.59385	3.31642	1.28793	1.77182	2.61363	2.05262	1.39297	2.30744	1.55779	1.88794	2.2768	2.50203	1.69085	1.20295	1.74856	1.36356	2.51524	1.35116	2.37186	3.30276	2.42064	1.54393	3.03475	1.76275	2.53736	2.30178	1.23925	1.56346	2.61139	2.74792	2.09196	2.41943	2.07139	1.23334	2.51101	1.01885	1.64981	1.92612	1.08719
Cell_0042	AMPKARt2	EAA 1.000000e-01 X + Insulin 10000 ng/ml	0.389048	0.614184	0.413508	0.661478	0.532072	0.601305	0.500178	0.637916	0.615557	0.661936	0.567957	0.715179	0.746253	0.657321	0.619845	0.676533	0.492828	0.605731	0.571259	0.709249	0.627764	0.603508	0.668702	0.608131	0.617723	0.510962	0.676734	0.659203	0.580649	0.657872	0.603169	0.591784	0.663045	0.583287	0.648947	0.379617	0.655894	0.601934	0.686707	0.535651	0.555024	0.739347	0.663397	0.429304	0.680302	0.631366	0.543539
Cell_0043	TFEB_TR	EAA 1.000000e-01 X + Insulin 10000 ng/ml	1.4079	0.532184	2.7523	2.10386	1.55668	0.693416	1.91667	0.853805	0.931081	2.30996	1.40756	0.933863	1.3832	0.526058	1.41428	1.65757	0.745257	1.4216	1.81006	1.24575	1.95319	0.711991	1.08601	0.940522	1.07905	1.58509	1.11333	2.75291	1.89598	0.894141	0.94597	1.57836	1.928	1.23604	0.992498	1.31839	1.25502	0.772034	2.25182	1.14921	1.34133	1.35978	1.10741	0.688507	1.46596	1.03168	0.758501
Cell_0043	FOXO_TR	EAA 1.000000e-01 X + Insulin 10000 ng/ml	1.81852	1.14373	1.24845	3.12448	1.43739	1.99108	2.29942	1.53495	1.6236	3.37698	1.30372	1.80729	2.56351	2.08162	1.36607	2.40651	1.56635	1.85498	2.28739	2.54696	1.69487	1.2268	1.78844	1.37268	2.5513	1.30992	2.41744	3.2678	2.4478	1.51753	2.96926	1.84762	2.45355	2.29323	1.23389	1.44393	2.45243	2.74675	2.10206	2.51501	2.00378	1.21401	2.50441	1.03061	1.6008	1.94825	1.05063
Cell_0043	AMPKARt2	EAA 1.000000e-01 X + Insulin 10000 ng/ml	0.385512	0.611001	0.411825	0.66087	0.533577	0.593684	0.491446	0.656524	0.638713	0.647472	0.566817	0.718869	0.752913	0.663208	0.615657	0.667959	0.540379	0.612752	0.549449	0.727792	0.624014	0.610976	0.662766	0.60764	0.616911	0.524341	0.695362	0.663114	0.589334	0.659229	0.60924	0.582749	0.654653	0.570872	0.640363	0.37684	0.659243	0.58745	0.689752	0.543307	0.555166	0.750487	0.670836	0.425033	0.669841	0.656359	0.552427
Cell_0044	TFEB_TR	EAA 1.000000e-01 X + Insulin 10000 ng/ml	1.35364	0.522408	2.46422	2.00765	1.44887	0.686049	1.94999	0.85257	0.965016	2.1354	1.20032	0.930482	1.46341	0.593508	1.19576	2.44526	0.642451	1.35209	1.80096	1.33147	2.21618	0.749455	0.980458	0.889106	1.56108	1.24842	1.06245	2.62045	2.01222	0.998972	0.926669	1.48278	2.00443	1.27655	1.02913	1.29685	1.49528	1.04665	1.97467	1.11879	1.34959	1.25795	1.21207	0.774023	1.37541	1.07642	0.76935
Cell_0044	FOXO_TR	EAA 1.000000e-01 X + Insulin 10000 ng/ml	1.72865	1.06057	1.23482	3.03776	1.4175	1.97044	2.33968	1.5684	1.67511	3.25658	1.32895	1.86758	2.52881	2.13527	1.37044	2.37394	1.54592	1.84725	2.44102	2.69774	1.77276	1.25578	1.73011	1.44814	2.60932	1.32251	2.42619	3.24934	2.43713	1.53994	2.80599	2.15404	2.36804	2.37623	1.2127	1.39255	2.41449	2.60865	2.14221	2.39275	1.91669	1.13006	2.41589	1.10422	1.67663	2.08525	1.02694
Cell_0044	AMPKARt2	EAA 1.000000e-01 X + Insulin 10000 ng/ml	0.391529	0.624112	0.425437	0.659232	0.525979	0.634923	0.496086	0.646027	0.653126	0.6489	0.556846	0.708763	0.755971	0.668475	0.61777	0.660216	0.545868	0.601028	0.532782	0.728678	0.6158	0.612525	0.653968	0.620385	0.605484	0.544513	0.711135	0.664258	0.59226	0.665093	0.594209	0.577274	0.659195	0.554525	0.65284	0.356011	0.660928	0.597861	0.694813	0.54661	0.556738	0.744821	0.684643	0.409619	0.676393	0.663294	0.551365
Cell_0045	TFEB_TR	EAA 1.000000e-01 X + Insulin 10000 ng/ml	1.24973	0.519158	2.42502	1.65103	1.59108	0.737611	2.00784	0.956284	0.920542	2.40892	1.04804	0.928878	1.45583	0.677861	1.31899	2.38114	0.675691	1.22491	1.87497	1.33531	2.29477	0.824171	0.933737	0.895579	1.63594	1.45694	1.03978	2.34693	1.61927	1.15632	0.922363	0.949109	2.17039	1.29445	1.09846	1.37679	1.52547	1.79225	1.88637	1.10039	1.3915	0.961067	1.09078	0.768479	1.23329	1.07028	0.776697
Cell_0045	FOXO_TR	EAA 1.000000e-01 X + Insulin 10000 ng/ml	1.65086	1.03204	1.20803	2.95972	1.43622	1.97164	2.38182	1.61961	1.67337	3.10951	1.31987	1.9158	2.64232	2.17378	1.40895	2.36169	1.58927	1.86095	2.54336	2.91167	1.86077	1.26775	1.68212	1.61554	2.53206	1.38818	2.31392	3.19164	2.37331	1.56639	2.62763	2.3451	2.44741	2.45295	1.23411	1.46072	2.36243	2.48357	2.03325	2.33813	1.90076	1.21077	2.41802	1.07273	2.11901	1.97501	1.01678
Cell_0045	AMPKARt2	EAA 1.000000e-01 X + Insulin 10000 ng/ml	0.414466	0.631085	0.42765	0.663808	0.517803	0.708566	0.509389	0.633367	0.648777	0.663901	0.554033	0.701229	0.747038	0.660499	0.63183	0.65959	0.524858	0.594096	0.546336	0.717796	0.616732	0.602798	0.666711	0.640582	0.618003	0.539481	0.694937	0.666149	0.567569	0.660757	0.583892	0.595539	0.663106	0.557676	0.666725	0.337477	0.663495	0.613827	0.687188	0.545975	0.562936	0.742382	0.681948	0.410555	0.70407	0.633176	0.546206
Cell_0046	TFEB_TR	EAA 1.000000e-01 X + Insulin 10000 ng/ml	1.16443	0.546888	2.55919	1.63687	1.5751	0.784003	2.0154	1.03961	0.839468	2.37477	1.16646	0.929039	1.39549	0.656163	1.31064	1.85575	0.672399	1.25691	1.93805	1.42894	2.02637	0.842594	0.910125	0.922017	1.27201	1.707	1.1239	2.18139	1.57076	1.08585	0.923146	1.14556	2.19472	1.20873	1.063	1.40037	1.31906	1.83411	1.9747	1.17012	1.33804	1.1065	0.81205	0.792324	1.27305	1.04961	0.77449
Cell_0046	FOXO_TR	EAA 1.000000e-01 X + Insulin 10000 ng/ml	1.60745	1.10382	1.18767	2.9086	1.48498	2.07942	2.3881	1.57992	1.61714	3.10658	1.33651	1.97539	2.72217	2.23634	1.41793	2.67712	1.63509	1.84007	2.56188	3.02612	1.88339	1.22797	1.7947	1.65754	2.50793	1.38546	2.30657	3.1461	2.36533	1.62225	2.52205	2.18615	2.50483	2.39821	1.29297	1.43331	2.28492	2.42764	2.2316	2.41574	1.89172	1.57695	2.53976	1.03415	2.47753	1.81999	0.974377
Cell_0046	AMPKARt2	EAA 1.000000e-01 X + Insulin 10000 ng/ml	0.425133	0.621988	0.421521	0.668746	0.522269	0.746713	0.51012	0.64815	0.644992	0.665566	0.571518	0.715719	0.745307	0.653143	0.635041	0.661873	0.528466	0.595036	0.540583	0.738389	0.624294	0.605383	0.669716	0.627522	0.647091	0.520434	0.673122	0.664145	0.555348	0.659978	0.584464	0.604167	0.658025	0.561078	0.660384	0.337774	0.661985	0.60615	0.686092	0.534269	0.561223	0.759159	0.668081	0.403674	0.723291	0.611009	0.547761
Cell_0047	TFEB_TR	EAA 1.000000e-01 X + Insulin 10000 ng/ml	1.13481	0.555162	2.44783	1.72452	1.40889	0.735155	2.03853	1.08821	0.862135	2.21815	1.34002	0.898747	1.39404	0.572147	1.05435	1.91183	0.651287	1.21178	1.91067	1.5227	1.96125	0.826438	0.958183	0.942341	1.39465	1.56222	1.13863	2.34629	1.8908	1.18416	0.915858	1.62514	2.45672	1.17348	1.09755	1.45619	1.19955	1.15736	1.8962	1.20641	1.35473	1.35277	0.833579	0.870555	1.39302	1.03907	0.779313
Cell_0047	FOXO_TR	EAA 1.000000e-01 X + Insulin 10000 ng/ml	1.62898	1.10948	1.15658	2.82541	1.49732	2.22457	2.39784	1.61057	1.63135	3.1051	1.37882	2.00565	2.70092	2.28604	1.38853	2.86443	1.66287	1.8539	2.56423	2.95206	1.82842	1.19766	1.85115	1.51872	2.60347	1.34762	2.41078	3.1653	2.41495	1.62627	2.4885	1.94049	2.32916	2.36608	1.29784	1.66656	2.335	2.35995	2.94213	2.36306	1.86253	2.01209	2.69278	1.07644	2.45409	1.90305	0.955488
Cell_0047	AMPKARt2	EAA 1.000000e-01 X + Insulin 10000 ng/ml	0.426773	0.619904	0.418679	0.671906	0.531425	0.726823	0.504566	0.665215	0.633579	0.66028	0.591996	0.730087	0.750004	0.656175	0.626999	0.64908	0.512383	0.590534	0.524156	0.749239	0.62594	0.613323	0.658308	0.600995	0.650166	0.506249	0.671898	0.658561	0.567322	0.654412	0.583012	0.600338	0.655548	0.550475	0.652048	0.360036	0.653701	0.592019	0.707652	0.527806	0.553149	0.761501	0.662895	0.393559	0.717533	0.625876	0.55871
Cell_0048	TFEB_TR	EAA 1.000000e-01 X + Insulin 10000 ng/ml	1.12753	0.537114	2.18492	1.51187	1.41366	0.646335	2.04991	1.17481	0.949825	2.33172	1.29452	0.899461	1.4282	0.555802	1.15176	2.52987	0.66259	1.11249	1.99024	1.43002	2.12333	0.875557	0.96845	0.962318	1.60117	1.40047	1.13704	2.52228	1.84699	1.46649	0.923198	1.47035	2.22604	1.32182	1.14137	1.75597	1.02984	0.846726	1.90783	1.11394	1.54146	1.19934	1.40233	0.806695	1.38383	1.01056	0.75146
Cell_0048	FOXO_TR	EAA 1.000000e-01 X + Insulin 10000 ng/ml	1.67483	1.08549	1.10674	2.8051	1.53214	2.29622	2.44876	1.73817	1.74582	3.02824	1.35614	1.96114	2.68381	2.38179	1.39361	2.51086	1.68175	1.88512	2.54341	2.82084	1.81641	1.20771	1.74203	1.43886	2.59209	1.39108	2.41996	3.17833	2.44883	1.55029	2.5161	1.8415	2.29272	2.42788	1.27216	2.50104	2.44419	2.26254	3.37452	2.24111	1.87303	2.29635	2.80447	1.06583	2.45922	1.86458	0.936587
Cell_0048	AMPKARt2	EAA 1.000000e-01 X + Insulin 10000 ng/ml	0.435191	0.628368	0.406161	0.675465	0.524646	0.67739	0.512546	0.656866	0.620011	0.658186	0.587935	0.719196	0.74511	0.65894	0.626553	0.627571	0.480482	0.588807	0.538057	0.717267	0.618366	0.608598	0.663039	0.609921	0.64011	0.498927	0.678844	0.655178	0.565793	0.646717	0.586438	0.600348	0.66034	0.554105	0.65319	0.366675	0.646608	0.596271	0.726712	0.533441	0.553039	0.740336	0.670013	0.411135	0.702379	0.655466	0.56253
Cell_0049	TFEB_TR	EAA 1.000000e-01 X + Insulin 10000 ng/ml	1.08503	0.540728	2.423	1.49814	1.42355	0.610336	2.02358	1.11288	0.974979	2.35069	1.15764	0.933448	1.37807	0.608643	1.26659	3.08668	0.671928	1.17646	2.16579	1.45151	2.13969	0.902793	0.89513	0.984067	1.20681	1.50048	1.17114	2.2937	1.80754	1.42502	0.936657	1.35527	1.58273	1.4968	1.06835	1.98062	0.945939	1.27421	2.09578	1.06543	1.60875	1.28479	0.746111	0.702964	1.23947	1.21525	0.714225
Cell_0049	FOXO_TR	EAA 1.000000e-01 X + Insulin 10000 ng/ml	1.67211	1.10895	1.10378	2.83232	1.60364	2.21695	2.49362	1.78064	1.82588	2.97805	1.31554	1.93753	2.65866	2.53879	1.43657	2.22827	1.64004	1.82476	2.55073	2.74672	1.95394	1.18725	1.63596	1.41168	2.57473	1.4513	2.40155	3.11055	2.41773	1.65554	2.58296	1.75646	2.69632	2.51936	1.29093	3.18766	2.41313	2.29236	3.27554	2.23293	1.90798	2.41034	1.57974	1.01894	2.59224	1.95183	0.889192
Cell_0049	AMPKARt2	EAA 1.000000e-01 X + Insulin 10000 ng/ml	0.440543	0.629929	0.397027	0.669514	0.510003	0.634618	0.524255	0.64028	0.625432	0.653355	0.567631	0.706133	0.742316	0.659895	0.622555	0.607167	0.491474	0.597509	0.540751	0.70255	0.610504	0.611306	0.667635	0.622269	0.641775	0.503527	0.686411	0.656412	0.547988	0.657504	0.595914	0.588359	0.674788	0.562912	0.659417	0.342516	0.649844	0.609852	0.722784	0.537287	0.551582	0.733002	0.578473	0.415443	0.696046	0.647746	0.551727
Cell_0050	TFEB_TR	EAA 1.000000e-01 X + Insulin 10000 ng/ml	1.00741	0.549115	2.90692	1.89263	1.32428	0.600871	2.07425	0.954802	0.955065	2.36652	1.1371	0.938361	1.29632	0.662546	0.983958	2.95703	0.82661	1.27985	2.17511	1.71652	2.08075	0.825286	0.917198	0.963691	1.00619	1.81699	1.08208	2.14848	2.14003	1.16187	0.930961	1.48953	2.26866	1.50916	1.0459	1.85844	1.06816	1.52276	2.2632	1.34223	1.46389	1.72671	0.754566	0.756657	1.2127	1.25955	0.728261
Cell_0050	FOXO_TR	EAA 1.000000e-01 X + Insulin 10000 ng/ml	1.62573	1.07389	1.13968	2.78619	1.60504	2.0364	2.48999	1.78572	1.81061	3.00458	1.34263	1.99609	2.60547	2.59943	1.48175	2.44872	1.58653	1.78735	2.62465	2.69797	1.98435	1.13615	1.54576	1.26844	2.73928	1.43241	2.49656	3.02747	2.28212	2.0326	2.60032	1.61657	3.11387	2.70577	1.3007	3.17731	2.31791	2.46732	3.25781	1.83696	1.91648	2.43861	1.64253	1.01711	2.57842	1.98205	0.881248
Cell_0050	AMPKARt2	EAA 1.000000e-01 X + Insulin 10000 ng/ml	0.433809	0.625883	0.413088	0.661203	0.506401	0.617417	0.509499	0.636805	0.633317	0.655921	0.561499	0.707487	0.748677	0.660534	0.607926	0.58367	0.507843	0.602086	0.519471	0.723614	0.613593	0.623586	0.65331	0.603098	0.642185	0.509934	0.698177	0.668323	0.541792	0.670653	0.591983	0.580424	0.692926	0.546374	0.664203	0.330924	0.659461	0.615168	0.718812	0.463632	0.546976	0.733028	0.578184	0.381324	0.697499	0.641722	0.552178
Cell_0051	TFEB_TR	EAA 1.000000e-01 X + Insulin 10000 ng/ml	0.966547	0.515287	2.85162	2.09676	1.336	0.595859	2.16221	1.11109	0.935413	2.4353	1.13693	0.919966	1.34925	0.681881	0.95707	2.40304	1.04483	1.28779	2.05919	1.83955	2.00386	0.767771	0.96107	0.915773	1.5377	1.95731	1.00233	2.4579	2.2157	1.06226	0.918335	1.43229	3.25265	1.47442	1.13269	1.71075	0.732916	1.00821	2.32748	1.20526	1.3749	1.667	0.749731	0.790964	1.35461	1.11876	0.730886
Cell_0051	FOXO_TR	EAA 1.000000e-01 X + Insulin 10000 ng/ml	1.63156	0.967816	1.14063	2.71253	1.55817	1.9596	2.47452	1.84846	1.72093	3.06059	1.36204	2.03491	2.62026	2.58845	1.55163	2.68737	1.56412	1.82338	2.633	2.65964	1.7696	1.14458	1.43939	1.37124	2.86794	1.41226	2.66963	3.00175	2.19663	2.39844	2.50858	1.55092	3.17129	2.92936	1.27238	3.05264	2.28136	2.55433	3.41087	1.743	1.91473	2.44773	1.60758	0.964372	2.53065	2.00298	0.875747
Cell_0051	AMPKARt2	EAA 1.000000e-01 X + Insulin 10000 ng/ml	0.423301	0.628653	0.42715	0.666895	0.508476	0.618904	0.487124	0.640969	0.629084	0.664533	0.574227	0.709216	0.749986	0.658417	0.605754	0.572175	0.494387	0.598678	0.520213	0.730635	0.621752	0.616527	0.63946	0.609465	0.64229	0.502541	0.698277	0.682574	0.548048	0.672041	0.580837	0.596701	0.691604	0.548502	0.653588	0.348043	0.6774	0.613959	0.728589	0.474945	0.553076	0.721525	0.594744	0.379493	0.700455	0.650845	0.564736
Cell_0052	TFEB_TR	EAA 1.000000e-01 X + Insulin 10000 ng/ml	0.981155	0.467284	2.63306	2.02353	1.43659	0.626181	2.13697	1.46579	0.91373	2.1753	1.0619	0.896478	1.48937	0.672035	1.38345	2.21419	1.06718	1.25195	1.99767	1.81946	1.96421	0.820458	0.931311	0.969903	1.89992	1.7475	1.14186	2.51137	2.11297	1.15143	0.913324	1.62026	2.58157	1.4476	1.2165	1.70761	0.778336	0.65967	2.13154	1.11081	1.39541	1.3828	0.730256	0.709068	1.36129	0.966067	0.719035
Cell_0052	FOXO_TR	EAA 1.000000e-01 X + Insulin 10000 ng/ml	1.71832	0.912214	1.15367	2.66089	1.56534	1.99284	2.47792	1.86277	1.63483	3.02359	1.33057	2.03363	2.73673	2.61574	1.56498	2.66662	1.52254	1.78689	2.56885	2.62465	1.89146	1.19988	1.40426	1.99554	2.82697	1.45056	2.80297	2.97137	2.30787	2.59036	2.40583	1.58104	3.08238	1.69628	1.30938	3.17406	2.42542	2.51465	3.46124	1.76255	1.932	2.40462	1.56241	0.903	2.55612	2.04301	0.846885
Cell_0052	AMPKARt2	EAA 1.000000e-01 X + Insulin 10000 ng/ml	0.422219	0.637564	0.416528	0.669738	0.50124	0.620259	0.496985	0.635486	0.626033	0.659411	0.584726	0.717268	0.749194	0.659135	0.616484	0.587053	0.49594	0.600283	0.528673	0.721725	0.626371	0.605619	0.63615	0.660223	0.650878	0.494883	0.688707	0.678107	0.544165	0.674915	0.587252	0.59906	0.67218	0.659485	0.64273	0.357363	0.663173	0.618238	0.725601	0.470746	0.562396	0.729049	0.607435	0.431879	0.70622	0.657967	0.559618
Cell_0053	TFEB_TR	EAA 1.000000e-01 X + Insulin 10000 ng/ml	0.995431	0.463428	2.67496	2.03953	1.58441	0.658374	2.10764	1.52093	0.927204	1.83259	1.04059	0.883912	1.55201	0.688538	1.41296	2.20791	1.12098	1.24473	1.9428	1.85611	2.13747	0.921011	0.995278	1.12917	1.72323	1.65916	1.23445	2.23905	2.41441	1.32117	0.874094	1.91519	1.90586	1.37077	1.28002	1.67292	0.747198	1.03922	1.94218	1.05264	1.38727	1.47251	0.708901	0.718846	1.2431	1.00728	0.761379
Cell_0053	FOXO_TR	EAA 1.000000e-01 X + Insulin 10000 ng/ml	1.78616	0.925286	1.18759	2.60272	1.61425	1.99403	2.47995	1.86359	1.70157	2.86576	1.30705	2.01689	2.82132	2.57224	1.49447	2.59558	1.52455	1.8732	2.56734	2.53781	2.60262	1.2128	1.416	2.53064	2.79672	1.4898	2.75716	2.90203	2.44071	2.64164	1.31955	1.60734	3.01603	1.72872	1.41142	3.24933	2.43284	2.52549	3.46244	1.77095	1.98062	2.32261	1.59866	0.963192	2.49127	2.04985	0.877305
Cell_0053	AMPKARt2	EAA 1.000000e-01 X + Insulin 10000 ng/ml	0.429965	0.638203	0.403312	0.661492	0.488099	0.61625	0.508578	0.619143	0.632377	0.648822	0.580654	0.73275	0.753432	0.662969	0.612459	0.606391	0.514011	0.607421	0.528243	0.719533	0.641257	0.617698	0.639432	0.672674	0.648371	0.502173	0.698196	0.668321	0.524094	0.669132	0.638292	0.584626	0.66535	0.64731	0.657788	0.332541	0.661587	0.627184	0.713903	0.457958	0.563961	0.753313	0.607074	0.459282	0.708227	0.64663	0.551753
Cell_0054	TFEB_TR	EAA 1.000000e-01 X + Insulin 10000 ng/ml	0.99601	0.499205	2.5415	1.9467	1.91597	0.667537	2.20695	1.47498	0.953373	1.78919	1.11173	0.904632	1.50961	0.737165	0.958671	1.94504	1.23843	1.31796	1.94536	1.82979	2.24713	0.938983	1.09939	1.23481	1.7013	1.64319	1.04932	1.63041	2.61467	1.27404	0.870049	1.62163	2.34201	1.25838	1.29097	1.62004	0.687376	1.29168	2.15332	0.995536	1.39879	1.34339	0.710268	0.802114	1.28045	1.17401	0.767776
Cell_0054	FOXO_TR	EAA 1.000000e-01 X + Insulin 10000 ng/ml	1.79665	0.948019	1.17358	2.54392	1.63672	2.01447	2.4746	1.96132	1.80603	2.80795	1.29261	1.97069	2.77455	2.45599	1.62282	2.50484	1.60734	2.29701	2.54634	2.4397	3.14929	1.19769	1.39828	2.55771	2.82687	1.50699	2.64587	1.56215	2.43009	2.54764	1.35879	1.6081	2.88116	1.73442	1.43217	3.23435	2.44473	2.56893	3.462	1.67585	2.0393	2.33695	1.64003	1.01274	2.39112	2.00626	0.896551
Cell_0054	AMPKARt2	EAA 1.000000e-01 X + Insulin 10000 ng/ml	0.428785	0.627742	0.402811	0.669215	0.486309	0.618728	0.492202	0.613542	0.642195	0.647352	0.576102	0.729774	0.753621	0.658191	0.606452	0.606872	0.495472	0.614097	0.540816	0.716365	0.667541	0.626727	0.643276	0.634067	0.631004	0.513472	0.711484	0.410423	0.513005	0.645374	0.641387	0.595708	0.6747	0.654015	0.669216	0.306742	0.665562	0.629861	0.720647	0.450231	0.560138	0.752294	0.602801	0.437422	0.699379	0.641956	0.561629
Cell_0055	TFEB_TR	EAA 1.000000e-01 X + Insulin 10000 ng/ml	0.989538	0.510886	2.42454	1.62308	2.23438	0.684381	2.25741	2.01013	0.917553	1.99982	1.17075	0.942109	1.40736	0.747007	0.919322	1.72687	1.10583	1.38385	2.09945	1.84276	2.08795	0.822988	1.08689	1.2761	0.86041	1.54473	0.983077	1.88548	2.22197	0.982102	0.899576	1.33073	2.34012	1.30195	1.24957	1.61002	0.745467	1.08406	2.2744	0.983427	1.48677	1.03969	0.71844	0.781661	1.32282	1.24815	0.709019
Cell_0055	FOXO_TR	EAA 1.000000e-01 X + Insulin 10000 ng/ml	1.79401	0.947193	1.18711	2.47617	1.58701	2.0147	2.48929	2.03953	1.69281	2.93567	1.29267	2.13136	2.70936	2.4084	1.98551	2.35851	1.63506	2.67223	2.45853	2.44099	3.1612	1.2092	1.3767	2.49308	1.78341	1.51144	2.69401	1.65778	2.34673	2.42554	1.35667	1.65524	2.77831	1.70319	1.3795	3.20247	2.49557	2.54676	3.48573	1.56277	2.06371	2.40923	1.58842	0.958059	2.35629	1.97164	0.835784
Cell_0055	AMPKARt2	EAA 1.000000e-01 X + Insulin 10000 ng/ml	0.41309	0.630334	0.411851	0.688271	0.484974	0.61898	0.491851	0.622846	0.640647	0.644707	0.585248	0.719554	0.749527	0.64423	0.636407	0.595649	0.440687	0.617312	0.544278	0.71333	0.678207	0.617756	0.644516	0.625272	0.404551	0.514143	0.699486	0.411389	0.521593	0.631043	0.654638	0.614037	0.678117	0.660325	0.655697	0.329367	0.665043	0.629539	0.724928	0.446115	0.554451	0.734536	0.593824	0.415489	0.693225	0.647601	0.554739
Cell_0056	TFEB_TR	EAA 1.000000e-01 X + Insulin 10000 ng/ml	0.963342	0.478877	2.5772	1.52302	2.28813	0.673506	2.15444	2.92464	0.876583	2.24016	1.18643	0.994089	1.33431	0.741365	1.26165	1.75014	1.12249	1.36345	2.23392	1.96749	1.99685	0.807939	1.002	1.34905	0.888528	1.92308	1.26206	1.77737	1.87845	0.997626	0.915209	1.54424	1.86613	1.27979	1.26594	1.55555	0.814036	0.937117	2.07586	1.05518	1.51774	1.19826	0.696261	0.750598	1.20376	1.26848	0.735473
Cell_0056	FOXO_TR	EAA 1.000000e-01 X + Insulin 10000 ng/ml	1.78072	0.935043	1.20198	2.43342	1.50433	1.90855	2.53273	2.04599	1.56675	2.99425	1.32218	2.61143	2.74054	2.35054	2.19876	2.23482	1.60146	2.71292	2.49197	2.53769	3.03694	1.76603	1.3737	2.54007	1.70586	1.496	2.72841	1.61393	2.29952	2.46761	1.33358	1.74918	2.84135	1.65283	1.39304	3.02268	2.48711	2.52001	3.64325	1.5049	2.07102	2.37075	1.51016	0.932101	2.32648	1.98367	0.821499
Cell_0056	AMPKARt2	EAA 1.000000e-01 X + Insulin 10000 ng/ml	0.402288	0.649018	0.426668	0.68586	0.461091	0.602675	0.513988	0.627796	0.632336	0.638365	0.588032	0.730343	0.749299	0.63755	0.680415	0.594171	0.418625	0.616006	0.52929	0.716672	0.669801	0.692561	0.65261	0.647714	0.429072	0.507329	0.688803	0.40278	0.528618	0.641483	0.667967	0.607733	0.675583	0.658778	0.655857	0.358161	0.661658	0.636372	0.718648	0.44127	0.553528	0.726904	0.584097	0.401429	0.695918	0.642665	0.527981
Cell_0057	TFEB_TR	EAA 1.000000e-01 X + Insulin 10000 ng/ml	0.955467	0.473086	2.38565	1.60828	2.20703	0.617141	2.104	3.10432	0.920619	2.10442	1.15849	1.06344	1.30892	0.792895	1.24952	1.8287	1.46135	1.36956	1.18496	1.90179	2.01049	0.798484	0.928106	1.39551	0.850791	2.21167	1.35068	1.73901	2.06218	1.31536	0.87216	1.65824	1.83558	1.13544	1.30866	1.47884	0.748548	1.0907	2.20076	1.12384	1.39593	1.34104	0.683709	0.789084	1.21077	1.35591	0.793891
Cell_0057	FOXO_TR	EAA 1.000000e-01 X + Insulin 10000 ng/ml	1.78774	0.965355	1.14699	2.44552	1.50347	1.9601	2.5747	2.07462	1.72345	2.89225	1.29899	2.96051	2.78728	2.23895	2.24552	2.12092	1.62832	2.67762	2.76036	2.62936	2.86246	1.84644	1.36483	2.47853	1.63444	1.48473	2.61771	1.61378	2.32501	2.57998	1.28007	1.8034	2.91066	1.63926	1.41775	2.85974	2.4204	2.53063	3.7768	1.49217	2.06317	2.32663	1.52509	0.920997	2.38179	1.99176	0.86103
Cell_0057	AMPKARt2	EAA 1.000000e-01 X + Insulin 10000 ng/ml	0.408324	0.647794	0.438621	0.669865	0.444939	0.614825	0.512927	0.628824	0.645783	0.638466	0.568268	0.740161	0.750912	0.645402	0.690183	0.605623	0.446223	0.620094	0.620764	0.715634	0.663672	0.676082	0.659997	0.646352	0.459164	0.507391	0.697146	0.401582	0.532287	0.652447	0.675976	0.600797	0.677936	0.658789	0.668239	0.333014	0.66304	0.641748	0.72838	0.440851	0.551824	0.724952	0.587255	0.404617	0.696329	0.644698	0.53209
Cell_0058	TFEB_TR	EAA 1.000000e-01 X + Insulin 10000 ng/ml	0.98352	0.517318	2.10786	1.52316	2.09057	0.611059	2.16329	2.49151	0.998739	1.93287	1.10364	1.1046	1.25283	0.827537	1.08484	0.826594	1.39845	1.42531	1.14575	1.77302	1.95742	0.851642	1.0106	1.33377	0.805703	1.65747	1.14388	1.83317	2.24071	1.43078	0.843477	1.54041	1.87889	1.20571	1.27434	1.47595	0.721085	1.47637	2.55031	1.09853	1.26804	1.1494	0.727648	0.761444	1.33929	1.38992	0.731962
Cell_0058	FOXO_TR	EAA 1.000000e-01 X + Insulin 10000 ng/ml	1.83498	1.02597	1.39618	2.45096	1.57885	2.20523	2.59009	2.06449	1.92977	2.82274	1.20402	2.9461	2.78223	2.23278	2.36024	1.43226	1.65905	2.6761	2.76132	2.63467	2.66675	1.87178	1.33825	2.32301	1.60059	1.48941	2.57936	1.67319	2.32847	2.59365	1.22507	1.82582	2.90541	1.65424	1.33446	2.98332	2.30996	2.52359	3.673	1.47766	1.98882	2.4157	1.60459	0.86511	2.52127	1.98197	0.862561
Cell_0058	AMPKARt2	EAA 1.000000e-01 X + Insulin 10000 ng/ml	0.418775	0.626133	0.449566	0.666551	0.464618	0.675499	0.507589	0.634053	0.679911	0.642529	0.556345	0.733311	0.749144	0.653913	0.673445	0.601052	0.456268	0.630765	0.603796	0.711137	0.663525	0.687238	0.647625	0.638355	0.478786	0.517315	0.700217	0.428267	0.535842	0.636792	0.680354	0.610466	0.674572	0.648454	0.655708	0.311813	0.66684	0.635329	0.733792	0.443489	0.537506	0.720163	0.602994	0.459427	0.695568	0.661842	0.556033
Cell_0059	TFEB_TR	EAA 1.000000e-01 X + Insulin 10000 ng/ml	0.986752	0.541248	2.48004	1.55086	1.95612	0.672	2.14266	2.44509	1.01662	2.3813	1.05839	1.12918	1.12127	0.748938	1.09522	0.808522	1.04087	1.42604	1.36665	1.86224	1.98858	0.859729	1.13642	1.23788	0.831185	1.64605	1.21115	1.7338	1.92142	1.36016	0.88344	1.41655	1.78156	1.25541	1.22771	1.5166	0.759035	1.61074	2.63876	1.01498	1.3133	0.988488	0.773015	0.684955	1.23962	1.3232	0.683624
Cell_0059	FOXO_TR	EAA 1.000000e-01 X + Insulin 10000 ng/ml	1.83495	1.04414	2.11754	2.50341	1.62637	2.28502	2.58511	1.97979	1.9135	2.85443	1.15002	2.89447	2.20773	2.28511	2.39777	1.40804	1.59774	2.60684	2.91324	2.55266	2.683	1.90994	1.32478	2.20715	1.5337	1.49261	2.60346	1.61224	2.23574	2.61469	1.24214	1.86305	2.95434	1.64601	1.25931	3.18257	2.25319	2.49629	3.49107	1.43085	1.88917	2.43188	1.68473	0.904643	2.53879	2.071	0.859637
Cell_0059	AMPKARt2	EAA 1.000000e-01 X + Insulin 10000 ng/ml	0.421233	0.62347	0.461966	0.672137	0.481374	0.708564	0.528629	0.638445	0.701727	0.645792	0.569874	0.736526	0.609139	0.652338	0.663191	0.59007	0.446442	0.63257	0.622356	0.716638	0.66364	0.678615	0.629131	0.646657	0.484908	0.524622	0.694706	0.459195	0.518721	0.607072	0.675496	0.624109	0.661409	0.629899	0.643697	0.336608	0.661129	0.626613	0.721501	0.447083	0.527068	0.705685	0.610136	0.507969	0.693878	0.664593	0.547275
Cell_0060	TFEB_TR	EAA 1.000000e-01 X + Insulin 10000 ng/ml	0.971752	0.530366	2.8772	1.7463	1.91502	0.696435	2.0772	3.03574	0.974519	1.15456	0.997828	1.20331	0.981174	0.649401	0.925528	0.788875	1.04567	1.35465	1.36505	1.864	2.02514	0.916193	1.02156	1.20083	0.868227	2.54883	1.43575	1.65968	1.76552	1.11492	0.914894	1.26224	1.7491	1.10808	1.23114	1.52823	0.706704	1.26738	2.67203	0.991535	1.37998	0.902797	0.775824	0.688492	1.0599	1.31434	0.742367
Cell_0060	FOXO_TR	EAA 1.000000e-01 X + Insulin 10000 ng/ml	1.79367	1.02902	2.68424	2.63429	1.64391	2.24996	2.55864	1.9581	1.8047	1.62798	1.16057	2.94121	2.10753	2.24016	2.26108	1.41165	1.54403	2.56086	2.9357	2.44818	2.65602	2.00921	1.35622	2.15571	1.45033	1.52819	2.6306	1.51193	2.20188	2.67178	1.27855	1.86295	3.0364	1.65965	1.28716	3.24895	2.33314	2.5023	3.42676	1.3874	1.80608	2.32643	1.80425	0.988175	2.46942	2.27849	0.855172
Cell_0060	AMPKARt2	EAA 1.000000e-01 X + Insulin 10000 ng/ml	0.421116	0.635734	0.457089	0.674652	0.475554	0.694758	0.539447	0.642168	0.699904	0.606982	0.579229	0.749226	0.610186	0.651174	0.666604	0.60209	0.45706	0.628271	0.627476	0.728578	0.663811	0.658081	0.625509	0.644289	0.489386	0.522007	0.691307	0.466047	0.496182	0.602028	0.667185	0.626888	0.661318	0.627103	0.653538	0.345243	0.655978	0.621007	0.723605	0.455284	0.537216	0.690604	0.597718	0.486228	0.688166	0.657733	0.531185
Cell_0061	TFEB_TR	EAA 1.000000e-01 X + Insulin 10000 ng/ml	0.981983	0.525	2.82537	1.70889	1.98992	0.676951	0.497033	2.75407	0.945046	1.00942	0.985869	1.28485	1.0296	0.674931	0.706958	0.780408	1.14986	1.25796	1.2037	1.7344	1.90656	1.07222	0.936848	1.207	0.838053	2.50349	1.3767	1.68416	2.37275	0.785495	0.910224	1.29887	1.81779	1.20199	1.21275	1.49912	0.678925	1.16863	2.57476	1.04841	1.26143	1.09238	0.796202	0.727451	1.12293	1.36295	0.739079
Cell_0061	FOXO_TR	EAA 1.000000e-01 X + Insulin 10000 ng/ml	1.79729	1.01783	2.72342	2.65379	1.65375	2.28651	1.49978	1.99027	1.78279	1.54554	1.16455	2.96604	2.0349	2.17013	2.1825	1.43381	1.59408	2.59577	2.7697	2.34529	2.51434	1.99236	1.39989	2.18763	1.44813	1.61684	2.75767	1.52229	2.28596	2.62451	1.2658	1.81949	3.05683	1.69422	1.31644	3.28858	2.40571	2.53296	3.42058	1.37083	1.71017	2.42224	1.94253	0.96447	2.45079	2.45571	0.839408
Cell_0061	AMPKARt2	EAA 1.000000e-01 X + Insulin 10000 ng/ml	0.424562	0.630657	0.437651	0.674865	0.47026	0.691772	0.602611	0.6399	0.696081	0.622111	0.572475	0.747312	0.624384	0.660696	0.671837	0.60501	0.451473	0.63087	0.6156	0.728967	0.660587	0.668279	0.63268	0.636086	0.48762	0.515508	0.689113	0.463501	0.505839	0.625867	0.669073	0.610648	0.674781	0.631839	0.649343	0.325304	0.667812	0.613162	0.724934	0.442288	0.552756	0.695959	0.582648	0.464562	0.68943	0.659487	0.547157
Cell_0062	TFEB_TR	EAA 1.000000e-01 X + Insulin 10000 ng/ml	0.97455	0.524875	2.8746	1.14885	2.12818	0.688427	0.509142	1.8554	0.944312	0.987274	1.12143	1.28665	1.25669	0.782897	0.834348	0.782704	1.17974	1.22753	1.35959	1.81602	1.86535	1.09825	1.04847	1.19365	0.8219	1.65445	1.17794	1.53323	2.57461	0.963945	0.917207	1.46787	1.89188	1.40672	1.17678	1.45458	0.755368	1.38949	2.25785	1.08405	1.17257	1.45111	0.873617	0.749665	1.22719	1.38376	0.661617
Cell_0062	FOXO_TR	EAA 1.000000e-01 X + Insulin 10000 ng/ml	1.7843	1.01736	2.60885	1.3169	1.62403	2.26378	1.48938	1.96479	1.82971	1.51964	1.15751	2.96218	2.04153	2.14374	2.21495	1.43175	1.67072	2.61379	2.7174	2.23917	2.78277	1.80601	1.42455	2.21507	1.42423	1.67097	2.73468	1.56495	2.27727	2.58631	1.25744	1.80604	2.99274	1.66287	1.3384	3.26188	2.55651	2.54524	3.42693	1.33874	1.66867	2.65033	2.00348	1.00535	2.4127	2.53799	0.852472
Cell_0062	AMPKARt2	EAA 1.000000e-01 X + Insulin 10000 ng/ml	0.423029	0.621129	0.43019	0.48271	0.463831	0.692054	0.613569	0.625855	0.703167	0.627208	0.567692	0.740394	0.636089	0.670068	0.665466	0.596884	0.434092	0.631144	0.62847	0.718149	0.655823	0.684961	0.638905	0.639403	0.475159	0.517212	0.691381	0.457444	0.531475	0.647949	0.674491	0.60091	0.674175	0.627917	0.633488	0.313873	0.675362	0.61009	0.707839	0.390249	0.557782	0.702599	0.574674	0.485989	0.690628	0.654529	0.548846
Cell_0063	TFEB_TR	EAA 1.000000e-01 X + Insulin 10000 ng/ml	0.89939	0.536421	2.93403	1.0191	2.17318	0.714144	0.499091	2.00966	0.913634	1.04376	1.23038	1.23636	1.34095	0.821522	1.08597	0.797408	1.34608	1.26069	1.55105	1.85793	1.91146	1.03379	0.994529	1.15109	0.871283	1.74705	1.07608	1.44795	1.67388	1.37212	0.897335	1.51086	1.69994	1.30211	1.24565	1.42877	0.839875	1.22334	2.18059	1.11605	1.26282	1.21486	0.963007	0.754791	1.12783	1.38701	0.663499
Cell_0063	FOXO_TR	EAA 1.000000e-01 X + Insulin 10000 ng/ml	1.32434	1.05559	2.60271	1.34932	1.56644	2.24858	1.46495	1.96006	1.81375	1.53586	1.16941	2.90753	2.09272	2.12744	2.22174	1.39858	1.72019	2.58982	2.81578	2.18736	3.24329	1.727	1.4513	2.11591	1.30771	1.62502	2.48057	1.55875	2.16349	2.64483	1.25567	1.82129	2.82441	1.63072	1.36865	3.14304	3.02139	2.57988	3.43857	1.28277	1.7129	2.61869	1.99256	1.04313	2.34616	2.5226	0.857983
Cell_0063	AMPKARt2	EAA 1.000000e-01 X + Insulin 10000 ng/ml	0.375511	0.630904	0.430296	0.495226	0.462819	0.682848	0.618722	0.623962	0.706415	0.633176	0.568027	0.743271	0.627291	0.670298	0.653508	0.607264	0.460096	0.620687	0.645989	0.716965	0.656801	0.686126	0.642629	0.636277	0.462749	0.530053	0.694839	0.443431	0.543511	0.654788	0.67034	0.618327	0.665762	0.621565	0.639613	0.302912	0.663343	0.618146	0.712776	0.359056	0.556454	0.691646	0.569565	0.488912	0.679641	0.647591	0.519093
Cell_0064	TFEB_TR	EAA 1.000000e-01 X + Insulin 10000 ng/ml	0.815002	0.549584	2.6688	1.0461	2.04206	0.704266	0.485653	2.7756	0.8726	1.08141	1.12558	1.21206	1.42144	0.785114	1.34102	0.80839	1.3227	1.22752	1.4967	1.67152	1.87513	1.03962	0.890313	1.12455	0.869533	2.44302	1.28738	1.58648	1.2806	1.18772	0.835938	1.59993	1.74515	1.20772	1.32471	1.44237	0.984279	1.0093	2.1311	1.24547	1.26717	0.704158	1.04873	0.695765	1.06483	1.32711	0.731481
Cell_0064	FOXO_TR	EAA 1.000000e-01 X + Insulin 10000 ng/ml	1.34911	1.08313	2.60961	1.3973	1.51267	2.32939	1.43697	2.08517	1.70676	1.54419	1.1956	2.782	2.14405	2.14506	2.21513	1.38253	1.78069	2.58338	2.89786	2.20027	3.28831	1.7969	1.4692	2.02509	1.25843	1.5776	2.46109	1.54854	2.16363	2.627	1.21281	1.83351	2.69273	1.67025	1.32358	3.14252	3.39889	2.65078	3.36078	1.25055	1.7115	2.48167	1.95417	0.865724	2.34458	2.43006	0.909004
Cell_0064	AMPKARt2	EAA 1.000000e-01 X + Insulin 10000 ng/ml	0.393654	0.638879	0.423638	0.496229	0.485652	0.692557	0.621901	0.644816	0.704777	0.638511	0.567016	0.742029	0.613876	0.669293	0.657574	0.617234	0.484092	0.615508	0.641991	0.722639	0.657658	0.684423	0.654285	0.634816	0.456544	0.536588	0.696239	0.446083	0.543305	0.652516	0.655288	0.626293	0.669195	0.61017	0.650961	0.302441	0.656746	0.625516	0.732715	0.389197	0.559666	0.69199	0.573569	0.473784	0.680664	0.656269	0.527525
Cell_0065	TFEB_TR	EAA 1.000000e-01 X + Insulin 10000 ng/ml	0.823768	0.516545	2.49738	1.00793	1.92873	0.686304	0.495948	2.78479	0.887884	1.06441	0.98615	1.2302	1.55977	0.781299	1.48354	0.796858	1.1387	1.21962	1.45936	1.68491	1.95998	0.914394	0.987422	1.12753	0.844484	2.48155	1.76173	1.63108	1.86391	0.860606	0.830873	1.55963	2.50583	1.34008	1.21788	1.48514	1.12505	1.26646	1.94802	1.38113	1.16965	0.885398	1.15301	0.641849	1.23341	1.26655	0.792981
Cell_0065	FOXO_TR	EAA 1.000000e-01 X + Insulin 10000 ng/ml	1.34619	1.04556	2.55552	1.4095	1.49937	2.31404	1.3908	2.29735	1.69984	1.53276	1.21007	2.69081	2.16637	2.17016	2.22424	1.40347	1.76724	2.63188	2.95969	2.20831	3.25314	1.76681	1.45742	2.11268	1.35463	1.62306	2.6609	1.57786	2.24211	2.57959	1.18256	1.87594	2.7635	1.68135	1.31551	3.26588	3.21956	2.64682	3.24393	1.25241	1.65473	2.5567	1.88441	1.01066	2.39683	2.40437	1.08044
Cell_0065	AMPKARt2	EAA 1.000000e-01 X + Insulin 10000 ng/ml	0.389656	0.626566	0.416731	0.493993	0.49917	0.700657	0.627336	0.654339	0.712341	0.634988	0.563814	0.7291	0.620252	0.669031	0.672983	0.608129	0.464624	0.621903	0.634706	0.718495	0.651909	0.684025	0.665085	0.645747	0.456099	0.529789	0.703342	0.459498	0.528554	0.642507	0.638619	0.61451	0.67095	0.597298	0.645675	0.334249	0.664396	0.621799	0.721462	0.418002	0.566011	0.703495	0.581908	0.483998	0.700408	0.659457	0.569745
Cell_0066	TFEB_TR	EAA 1.000000e-01 X + Insulin 10000 ng/ml	0.806761	0.482362	2.49703	0.886401	1.8372	0.68567	0.499472	2.44015	0.910759	1.05504	1.00136	1.24312	1.15555	0.797529	1.14288	0.799355	1.27951	1.3492	1.48161	1.86504	2.23548	0.709142	0.981975	1.11277	0.945131	2.16666	1.87972	1.65555	1.89427	1.0677	0.871106	1.23173	2.81267	1.39449	1.16401	1.52332	1.10217	1.51371	2.36207	1.38509	1.19103	1.36387	1.23683	0.691262	1.30174	1.35502	0.85983
Cell_0066	FOXO_TR	EAA 1.000000e-01 X + Insulin 10000 ng/ml	1.32203	1.06212	2.4743	1.37984	1.56326	2.24529	1.35749	2.47208	1.83681	1.53907	1.20356	2.68717	2.16241	2.13519	2.17325	1.42794	1.6027	2.66524	2.98943	2.24012	3.44056	1.67091	1.44389	2.20435	1.50636	1.63262	2.62983	1.63421	2.219	2.61469	1.17774	1.95191	2.88859	1.64791	1.4139	3.32136	2.81168	2.591	3.22802	1.25009	1.69329	2.65047	1.79881	1.72716	2.43172	2.43368	1.18664
Cell_0066	AMPKARt2	EAA 1.000000e-01 X + Insulin 10000 ng/ml	0.387913	0.616777	0.415387	0.504985	0.478516	0.692539	0.633494	0.643225	0.718441	0.633388	0.56049	0.724189	0.632084	0.666831	0.672457	0.604315	0.454912	0.619776	0.639032	0.719756	0.649434	0.685652	0.656361	0.635443	0.461352	0.532061	0.707201	0.453958	0.512357	0.625802	0.639167	0.625622	0.670824	0.595843	0.642149	0.357755	0.668477	0.616464	0.697605	0.403847	0.569251	0.69954	0.579895	0.504698	0.705352	0.6464	0.571363
Cell_0067	TFEB_TR	EAA 1.000000e-01 X + Insulin 10000 ng/ml	0.81741	0.511649	2.30289	0.912496	1.89115	0.680761	0.480011	2.40166	0.902157	1.13101	1.04895	1.20218	0.602765	0.748812	0.885441	0.805073	1.42312	1.35856	1.44844	1.89221	2.41767	0.827212	0.82137	1.04915	1.05075	2.14307	1.55892	1.75758	1.59698	1.39601	0.848412	1.18165	1.95917	1.353	1.34543	1.54512	1.10219	1.39861	3.07001	1.34443	1.23771	1.29761	1.26482	0.734339	1.10367	1.43302	0.902052
Cell_0067	FOXO_TR	EAA 1.000000e-01 X + Insulin 10000 ng/ml	1.30138	1.13511	2.42703	1.37255	1.61737	2.26923	1.40533	2.46995	1.89767	1.57473	1.21468	2.75716	2.24478	2.05167	2.10086	1.44315	1.50765	2.58823	2.91378	2.31141	3.47516	1.69281	1.41737	2.09442	1.63124	1.5307	2.43212	1.66276	2.16164	2.57964	1.12497	1.96882	2.86081	1.64042	1.38432	3.30222	2.57441	2.64732	3.22766	1.23914	1.83252	2.60496	1.73081	2.1785	2.41077	2.34947	1.17006
Cell_0067	AMPKARt2	EAA 1.000000e-01 X + Insulin 10000 ng/ml	0.40238	0.626241	0.418459	0.51885	0.456632	0.695341	0.64	0.640368	0.717716	0.636569	0.563624	0.738728	0.6294	0.66648	0.660493	0.608277	0.469628	0.610967	0.647653	0.733779	0.653668	0.684374	0.654822	0.609888	0.476954	0.548625	0.696411	0.461173	0.524991	0.612149	0.656549	0.647908	0.678845	0.593355	0.646823	0.345605	0.666257	0.629869	0.697526	0.380989	0.580804	0.707131	0.580881	0.525882	0.689596	0.640371	0.557384
Cell_0068	TFEB_TR	EAA 1.000000e-01 X + Insulin 10000 ng/ml	0.887702	0.549938	2.11981	0.998734	2.41915	0.679466	0.483289	2.61763	0.930675	1.22503	1.04855	1.13567	0.786344	0.686643	1.32883	0.771066	1.25439	1.16723	1.39714	1.92218	2.4516	1.07851	0.898637	0.983813	1.02905	1.92583	1.32588	1.68033	1.95387	1.37798	0.819482	1.41829	1.21393	1.37498	1.34543	1.58796	1.24424	1.05446	3.03202	1.35481	1.21809	1.04244	1.29479	0.686493	1.07019	1.38146	0.873574
Cell_0068	FOXO_TR	EAA 1.000000e-01 X + Insulin 10000 ng/ml	1.29628	1.10284	2.39827	1.39832	1.58265	2.2985	1.47964	2.34026	1.8891	1.59352	1.23541	2.86847	2.3529	1.97192	2.14409	1.45956	1.61909	2.50363	2.82485	2.27025	3.35342	1.77837	1.36456	1.95609	1.67464	1.52304	2.30541	1.66915	2.15382	2.48612	1.08331	1.95109	2.73909	1.61792	1.36286	3.31755	2.415	2.73521	3.17796	1.25213	1.91009	2.54837	1.70137	2.12242	2.41201	2.24538	1.24255
Cell_0068	AMPKARt2	EAA 1.000000e-01 X + Insulin 10000 ng/ml	0.411843	0.637977	0.41787	0.51288	0.447237	0.69474	0.642202	0.640846	0.723961	0.634708	0.569506	0.75033	0.632302	0.665416	0.664579	0.606158	0.474824	0.621617	0.640361	0.732455	0.652682	0.679136	0.668842	0.608959	0.504106	0.557408	0.683001	0.499254	0.534668	0.610236	0.668974	0.636927	0.672071	0.583838	0.65022	0.333062	0.664951	0.656659	0.712256	0.36969	0.598908	0.73743	0.594872	0.538537	0.682588	0.644543	0.582431
Cell_0069	TFEB_TR	EAA 1.000000e-01 X + Insulin 10000 ng/ml	0.866969	0.560068	2.184	0.963996	2.70372	0.702659	0.500933	3.0357	0.974944	1.25743	1.05247	1.1099	1.1186	0.689076	1.48899	0.779262	1.23826	1.12133	1.37628	1.92765	2.52105	1.04912	1.24323	0.980982	1.05469	1.74329	1.23662	1.61865	1.92365	1.12051	0.879687	1.42553	1.52135	1.36147	1.10876	1.65987	1.30761	0.913725	2.52689	1.31501	1.19243	1.23504	1.35784	0.640037	0.488931	1.40563	0.873978
Cell_0069	FOXO_TR	EAA 1.000000e-01 X + Insulin 10000 ng/ml	1.29794	1.06889	2.36629	1.41651	1.54782	2.34588	1.4838	2.31313	1.92964	1.5758	1.20732	2.89147	2.30015	1.98564	2.24806	1.46034	1.66781	2.54038	2.8187	2.12508	3.30284	1.82549	1.37352	1.99016	1.63246	1.58936	2.22389	1.71362	2.11663	2.53088	1.13351	2.12677	2.70368	1.56855	1.80872	3.35855	2.24005	2.68614	3.20019	1.26944	1.87007	2.49781	1.68412	2.12664	1.00072	2.24872	1.3523
Cell_0069	AMPKARt2	EAA 1.000000e-01 X + Insulin 10000 ng/ml	0.402146	0.633709	0.416841	0.498657	0.440563	0.683479	0.63421	0.630566	0.728194	0.632503	0.566878	0.74317	0.643526	0.665003	0.677384	0.606234	0.462726	0.635992	0.621966	0.715312	0.646219	0.678109	0.650033	0.615418	0.523079	0.551075	0.678816	0.511754	0.50713	0.620105	0.670351	0.616735	0.657139	0.580555	0.664993	0.332205	0.665617	0.6646	0.715868	0.373769	0.595783	0.736899	0.600202	0.513389	0.690257	0.647196	0.599427
Cell_0070	TFEB_TR	EAA 1.000000e-01 X + Insulin 10000 ng/ml	0.834281	0.55786	2.2854	0.978463	2.17685	0.717009	0.497518	2.97474	0.958345	1.28282	0.968419	1.13046	1.1565	0.692941	0.907964	0.853055	1.4688	1.26471	1.49315	1.77682	2.62038	1.02548	1.3509	1.02333	1.18441	2.56714	1.26281	1.75834	1.18242	0.939606	0.941434	1.41353	2.01731	1.24783	1.12351	1.70395	1.24266	1.44647	2.16947	1.21584	1.11722	1.18621	1.38849	0.615701	0.51165	1.47187	0.987304
Cell_0070	FOXO_TR	EAA 1.000000e-01 X + Insulin 10000 ng/ml	1.28603	1.15006	2.42517	1.42456	1.52985	2.42078	1.47454	2.36126	1.92238	1.56747	1.20042	2.83105	2.2525	2.06482	2.24637	1.44758	1.56459	2.58078	2.80012	2.10864	3.20171	1.82866	1.43497	2.07761	1.59831	1.50241	2.19437	1.70647	2.15938	2.65808	1.16562	2.51055	2.77622	1.54706	2.49526	3.29192	2.09253	2.62988	3.2541	1.26672	1.82859	1.05711	1.62417	2.13464	1.05901	2.25183	1.32108
Cell_0070	AMPKARt2	EAA 1.000000e-01 X + Insulin 10000 ng/ml	0.387967	0.62041	0.433052	0.497902	0.444753	0.692426	0.626511	0.635759	0.723939	0.632358	0.563778	0.738923	0.631544	0.673147	0.676727	0.608358	0.446129	0.621539	0.626235	0.715204	0.644639	0.670233	0.615866	0.604327	0.522779	0.539084	0.683507	0.492032	0.50898	0.630439	0.659906	0.627794	0.667073	0.58234	0.686149	0.322299	0.67083	0.654366	0.703883	0.39026	0.57897	0.54959	0.595446	0.501066	0.677615	0.651861	0.575954
Cell_0071	TFEB_TR	EAA 1.000000e-01 X + Insulin 10000 ng/ml	0.886249	0.535326	2.40828	1.12462	1.93478	0.699465	0.509596	2.14766	0.961323	1.30796	0.843454	1.13995	1.35605	0.674354	0.91252	0.873617	1.59321	1.2757	1.65712	1.74156	2.60775	1.21361	1.0789	1.05186	1.21789	3.16567	1.48347	1.73106	1.1342	1.06049	0.938776	1.69235	1.74661	1.19227	1.29191	1.71238	1.16443	1.94391	1.18224	1.20092	1.05143	1.33549	1.37423	0.563256	0.48991	1.41734	1.04696
Cell_0071	FOXO_TR	EAA 1.000000e-01 X + Insulin 10000 ng/ml	1.25629	1.18706	2.57527	1.41567	1.47681	2.35833	1.54562	2.27529	1.99494	1.5969	1.2646	2.86303	2.37174	2.07695	2.18066	1.46266	1.59806	2.51977	2.72837	2.1841	3.11876	1.77702	1.43666	2.09866	1.63035	1.5847	2.23399	1.56018	2.41326	2.66992	1.11774	2.77564	2.83866	1.53938	2.78465	3.11886	1.99223	2.66417	1.91117	1.2871	1.82626	1.03229	1.5845	1.98934	1.03446	2.22741	1.26515
Cell_0071	AMPKARt2	EAA 1.000000e-01 X + Insulin 10000 ng/ml	0.390134	0.617193	0.448881	0.500157	0.44899	0.701532	0.626988	0.648968	0.727723	0.626676	0.569184	0.745417	0.614704	0.677919	0.674556	0.60653	0.450599	0.603591	0.642239	0.732359	0.642222	0.657713	0.626303	0.595454	0.516412	0.543166	0.690919	0.486213	0.564237	0.623834	0.646857	0.644589	0.674449	0.58543	0.682499	0.314984	0.681057	0.6537	0.755078	0.384588	0.579516	0.520319	0.600529	0.556574	0.704693	0.657614	0.56944
Cell_0072	TFEB_TR	EAA 1.000000e-01 X + Insulin 10000 ng/ml	0.885547	0.541373	2.52758	1.11617	2.20504	0.688006	0.538414	1.80222	1.04372	1.32841	0.929076	1.10977	1.38164	0.703232	1.61316	0.885829	1.58268	1.14834	1.66323	1.82382	2.52134	1.22615	1.05805	1.05969	1.14335	2.46608	1.51425	1.63063	1.60516	1.2459	0.92442	1.9251	1.48034	1.31465	1.25421	1.54162	1.10111	1.58597	1.19586	1.21638	1.07064	1.58579	1.38042	0.534829	0.49506	1.40636	0.944545
Cell_0072	FOXO_TR	EAA 1.000000e-01 X + Insulin 10000 ng/ml	1.22942	1.19463	2.65147	1.36737	1.49373	2.23259	1.62129	2.13117	2.30255	1.61071	1.26517	2.93575	2.46164	2.08503	2.21497	1.49532	1.74635	2.4448	2.67864	2.17164	3.23859	1.70299	1.58663	2.09476	1.62817	2.15787	2.28199	1.45492	2.60319	2.57977	1.09218	2.78945	2.94535	1.53363	2.71306	1.18362	2.01322	2.6423	1.83594	1.31637	1.79099	1.03643	1.64489	2.00462	1.06777	2.22576	1.29262
Cell_0072	AMPKARt2	EAA 1.000000e-01 X + Insulin 10000 ng/ml	0.401546	0.625432	0.44294	0.494806	0.441792	0.686705	0.624692	0.627381	0.733758	0.624273	0.573792	0.740985	0.631139	0.669356	0.679946	0.604946	0.467474	0.613749	0.638133	0.735691	0.630596	0.663034	0.65464	0.595248	0.506487	0.5792	0.695229	0.479609	0.585457	0.612799	0.657266	0.635179	0.659572	0.584034	0.66832	0.644071	0.689568	0.658102	0.739157	0.361156	0.584327	0.518787	0.60719	0.592816	0.715953	0.657469	0.598735
Cell_0073	TFEB_TR	EAA 1.000000e-01 X + Insulin 10000 ng/ml	0.858623	0.609796	2.38725	0.966976	1.92657	0.694808	0.535618	2.16603	1.06271	1.48297	1.07103	1.14168	1.20745	0.7305	1.54126	0.985841	1.58814	1.17071	1.69993	1.83154	2.40082	1.05958	1.40145	1.0656	1.15921	2.26812	1.21682	1.83031	1.56521	1.07711	0.898061	1.77388	1.1106	1.50065	1.14915	1.67328	1.08599	1.2676	1.53391	1.16982	1.07672	1.73251	1.40176	0.569076	0.557423	1.51241	0.867929
Cell_0073	FOXO_TR	EAA 1.000000e-01 X + Insulin 10000 ng/ml	1.21965	1.25585	2.62529	1.35228	1.59676	2.24828	1.57806	2.09984	2.41234	1.56131	1.21054	2.96766	2.48939	2.07779	2.33409	1.49766	1.7505	2.39721	2.61327	2.30948	3.33587	1.68237	2.14749	2.07006	1.52427	2.7127	2.31613	1.52197	2.53007	2.57257	1.09831	2.76674	2.98014	1.53483	2.75078	1.19832	2.17889	2.5933	1.82312	1.30029	1.75565	1.02335	1.70041	2.12315	1.17704	2.23434	1.30404
Cell_0073	AMPKARt2	EAA 1.000000e-01 X + Insulin 10000 ng/ml	0.40786	0.629078	0.439575	0.488452	0.449052	0.686059	0.615889	0.605382	0.727926	0.631442	0.576781	0.734024	0.652236	0.66309	0.67265	0.602095	0.461725	0.629318	0.632406	0.726226	0.624511	0.669225	0.656542	0.588009	0.493362	0.610709	0.693683	0.463498	0.565677	0.626121	0.670099	0.621612	0.596838	0.56939	0.668909	0.642728	0.695898	0.654345	0.737626	0.368721	0.574597	0.520593	0.605112	0.549118	0.696939	0.655951	0.614692
Cell_0074	TFEB_TR	EAA 1.000000e-01 X + Insulin 10000 ng/ml	0.90797	0.651914	2.23757	1.00694	1.61129	0.698338	0.527938	1.90309	0.950563	1.75393	0.952144	1.28931	1.51411	0.691296	0.920565	1.04855	1.71442	1.3716	1.76568	1.89051	2.18819	1.02817	1.53653	1.05638	1.26506	2.82354	1.0909	2.00024	1.38828	0.649734	0.872728	1.4714	1.13264	1.54965	1.04201	1.84518	1.12968	1.57418	1.87198	1.19145	1.09115	1.58975	1.41269	0.618581	0.5846	1.63674	0.894413
Cell_0074	FOXO_TR	EAA 1.000000e-01 X + Insulin 10000 ng/ml	1.22946	1.22163	2.60495	1.46229	1.65168	2.32737	1.46033	2.10476	2.09212	1.5276	1.21804	3.06285	2.51401	1.98392	2.36459	1.48276	1.80931	2.37848	2.488	2.82216	3.26499	1.69691	2.7416	2.02911	1.44737	2.88278	2.30134	1.59938	2.41035	1.64286	1.08881	2.80094	2.92569	1.51444	2.88945	1.18336	2.34665	2.63216	1.84913	1.27866	1.78179	1.00796	1.6866	2.08825	1.20616	2.28919	1.27593
Cell_0074	AMPKARt2	EAA 1.000000e-01 X + Insulin 10000 ng/ml	0.415106	0.625294	0.44542	0.473135	0.46945	0.70425	0.610019	0.629438	0.721625	0.632373	0.581132	0.741947	0.644958	0.666769	0.659204	0.600967	0.465243	0.6302	0.634375	0.737381	0.633627	0.661487	0.647273	0.584934	0.483614	0.603027	0.680798	0.479559	0.565797	0.60856	0.656238	0.621016	0.593625	0.558127	0.661271	0.645036	0.700846	0.650923	0.743733	0.38982	0.570416	0.507714	0.605245	0.522446	0.694939	0.653836	0.606727
Cell_0075	TFEB_TR	EAA 1.000000e-01 X + Insulin 10000 ng/ml	0.927376	0.621076	2.40772	1.1583	1.9671	0.705306	0.562196	1.25411	0.860063	1.9282	0.798144	1.35513	1.75167	0.66224	1.12474	1.02172	1.84638	1.46664	1.56143	1.94632	2.1384	1.03032	1.54449	1.02289	1.27338	2.48535	0.663658	1.87559	1.29218	0.681912	0.898129	1.47863	1.15679	1.36147	0.881169	1.64968	1.21702	1.57209	1.72855	1.2534	1.12775	1.4368	1.44248	0.657506	0.55785	1.78105	0.887656
Cell_0075	FOXO_TR	EAA 1.000000e-01 X + Insulin 10000 ng/ml	1.25861	1.15117	2.57125	1.63893	1.68357	2.37117	1.38603	2.00934	1.8237	1.60004	1.19723	3.06337	2.37887	2.24407	2.24265	1.48471	2.19866	2.42464	2.41092	3.32122	3.18943	1.68594	2.90885	1.99404	1.48809	2.98613	1.45797	1.56509	2.36249	1.72058	1.11061	2.75983	2.89065	1.49982	2.86831	1.16159	2.40616	2.61082	1.84647	1.26011	1.80631	1.02668	1.71178	1.9712	1.17634	2.35571	1.2796
Cell_0075	AMPKARt2	EAA 1.000000e-01 X + Insulin 10000 ng/ml	0.420711	0.631299	0.443598	0.450937	0.474242	0.69716	0.612248	0.644737	0.721687	0.625122	0.575729	0.743062	0.627775	0.674632	0.6662	0.602005	0.498639	0.626403	0.627791	0.76636	0.642269	0.667677	0.644726	0.606407	0.477772	0.59068	0.56545	0.503527	0.570364	0.592842	0.651189	0.620181	0.599336	0.562396	0.652669	0.661037	0.69473	0.650203	0.745208	0.373175	0.578823	0.500386	0.60887	0.554547	0.699922	0.647525	0.601965
Cell_0076	TFEB_TR	EAA 1.000000e-01 X + Insulin 10000 ng/ml	0.916733	0.566127	2.5057	1.2334	2.10547	0.709254	0.642887	1.66392	0.870868	2.08123	0.914651	1.26258	1.45991	0.678748	1.76237	1.03631	1.86651	1.31251	1.45068	1.85028	2.35789	1.02316	1.62913	1.15574	1.23746	1.95844	0.602369	1.77211	1.10665	0.691472	0.91574	1.72094	1.10051	1.07938	0.891535	1.22282	1.27718	1.14668	1.40166	1.2049	1.0652	1.64361	1.44539	0.641542	0.549757	1.76439	0.852367
Cell_0076	FOXO_TR	EAA 1.000000e-01 X + Insulin 10000 ng/ml	1.28469	1.1915	2.47957	1.75526	1.70563	2.43299	1.38854	1.90596	1.83887	1.69985	1.23263	2.85865	2.19933	2.99748	2.11433	1.49475	2.58932	2.42608	2.44284	3.44556	3.05826	1.67409	2.89227	1.66428	1.57843	3.10357	1.48781	1.53319	2.33418	1.73991	1.15654	2.66443	2.84215	1.52396	2.80561	1.18076	2.37732	2.50748	1.84418	1.2328	1.78416	1.02971	1.79381	1.87475	1.18594	2.32179	1.28308
Cell_0076	AMPKARt2	EAA 1.000000e-01 X + Insulin 10000 ng/ml	0.419079	0.646093	0.443976	0.453093	0.473545	0.673354	0.614283	0.623942	0.723482	0.625045	0.569891	0.734957	0.614626	0.682755	0.674534	0.597772	0.50131	0.620735	0.632278	0.778954	0.645581	0.687315	0.63851	0.664521	0.48923	0.596665	0.557838	0.482753	0.560501	0.599879	0.661764	0.622313	0.598697	0.565312	0.674104	0.671737	0.68315	0.649554	0.744203	0.341523	0.585946	0.514846	0.614779	0.558118	0.688393	0.6483	0.601685
Cell_0077	TFEB_TR	EAA 1.000000e-01 X + Insulin 10000 ng/ml	0.994497	0.528672	2.34618	1.31779	2.18234	0.70874	0.757203	2.72748	0.900678	2.38941	1.09484	1.23408	1.36611	0.696514	1.68095	1.093	2.08494	1.10861	1.72817	1.76908	0.640011	1.11346	1.70208	1.36326	1.33147	2.09138	0.67706	1.79136	1.27503	0.696975	0.898531	1.64213	1.08244	1.11584	1.04112	1.31545	1.17391	1.08845	1.31669	1.18457	1.01052	1.98376	1.39036	0.55577	0.555042	1.50904	0.866127
Cell_0077	FOXO_TR	EAA 1.000000e-01 X + Insulin 10000 ng/ml	1.28423	1.17928	2.44695	1.75912	1.69218	2.44632	1.44568	2.08961	1.90866	1.71603	1.63648	2.82084	2.19659	3.46368	2.10784	1.50626	2.59332	2.29936	2.50949	3.38965	1.02759	1.69245	2.97112	1.77443	1.68701	3.06361	1.51502	1.61653	2.35417	1.72897	1.15886	2.6627	2.80314	1.53052	2.82084	1.21581	2.37485	2.54737	1.88498	1.27327	1.75843	1.00332	1.84314	1.91934	1.20595	2.21889	1.26741
Cell_0077	AMPKARt2	EAA 1.000000e-01 X + Insulin 10000 ng/ml	0.422708	0.638436	0.45321	0.472691	0.480977	0.673502	0.601753	0.631367	0.727366	0.631647	0.59444	0.742892	0.605213	0.68123	0.664687	0.601572	0.470183	0.613357	0.649224	0.774749	0.624304	0.69285	0.614376	0.645574	0.513701	0.595107	0.56135	0.451832	0.547334	0.623353	0.655376	0.627608	0.604053	0.559279	0.688671	0.673331	0.685828	0.651118	0.746594	0.346403	0.593455	0.530088	0.61954	0.520817	0.68858	0.660042	0.601938
Cell_0078	TFEB_TR	EAA 1.000000e-01 X + Insulin 10000 ng/ml	1.08163	0.538241	2.3488	1.34686	3.04398	0.733478	0.844104	3.04965	0.916612	2.62823	1.09849	1.32233	1.51264	0.699747	1.10836	1.12493	2.41311	1.62013	1.78439	1.74612	0.698462	1.10005	1.99924	1.51622	1.41607	1.96331	0.733247	1.81431	1.53103	0.7182	0.911719	1.25868	1.21003	1.47338	1.10732	1.7994	1.06359	1.21791	1.74785	1.23418	1.09031	1.81182	1.41888	0.531877	0.559392	1.37739	0.885302
Cell_0078	FOXO_TR	EAA 1.000000e-01 X + Insulin 10000 ng/ml	1.27058	1.11903	2.53134	1.66575	1.91129	2.35585	1.49064	2.58772	1.91622	1.69501	2.22154	2.99743	2.1467	3.41592	2.14021	1.52849	2.43007	1.18936	2.5383	3.35074	1.03287	1.69734	2.98214	1.77789	1.81021	2.96186	1.51613	1.7247	2.37822	1.70775	1.1341	2.66559	2.76333	1.50716	2.80919	1.20725	2.58013	2.67334	1.89218	1.29446	1.76265	0.994183	1.84163	2.07586	1.2384	2.15332	1.3295
Cell_0078	AMPKARt2	EAA 1.000000e-01 X + Insulin 10000 ng/ml	0.428466	0.613743	0.468133	0.471252	0.489587	0.689554	0.585006	0.66683	0.729586	0.634316	0.635948	0.747738	0.607783	0.670606	0.667977	0.616061	0.451219	0.438744	0.640778	0.77182	0.630421	0.683617	0.599167	0.650723	0.517587	0.588089	0.577288	0.454627	0.530401	0.634382	0.653909	0.623726	0.621625	0.552211	0.677391	0.683111	0.695301	0.651097	0.750422	0.381501	0.59462	0.517794	0.605049	0.512379	0.700829	0.667077	0.608005
Cell_0079	TFEB_TR	EAA 1.000000e-01 X + Insulin 10000 ng/ml	1.09453	0.576307	2.50163	1.25297	3.2762	0.739655	0.861654	2.86092	0.917204	2.68392	1.04546	1.38893	1.58954	0.671399	0.590659	1.16191	2.30604	1.63201	1.44213	1.69422	0.682795	0.989615	2.11795	1.37949	1.32019	1.63132	0.629932	1.8759	1.3321	0.729707	0.928455	1.35025	1.2469	1.54587	1.2276	1.81608	1.20137	1.1204	2.74818	1.15642	1.14739	1.30416	1.557	0.583555	0.588549	1.4154	0.867741
Cell_0079	FOXO_TR	EAA 1.000000e-01 X + Insulin 10000 ng/ml	1.26105	1.20949	2.59671	1.51713	2.44208	2.28928	1.46647	2.98248	1.83017	1.71092	2.49785	3.00112	1.95995	3.43163	1.56969	1.55961	2.45873	1.17425	2.48698	3.31708	1.05425	1.65959	2.90325	1.70097	1.88289	2.8639	1.50048	1.73064	2.34915	1.69638	1.13088	2.54808	2.70909	1.51532	2.86992	1.19777	2.90569	2.68757	1.84142	1.16186	1.78066	0.998691	1.85163	2.04622	1.28129	2.17749	1.41049
Cell_0079	AMPKARt2	EAA 1.000000e-01 X + Insulin 10000 ng/ml	0.423875	0.62087	0.487841	0.458558	0.502609	0.69203	0.586881	0.672242	0.728886	0.629125	0.644376	0.731773	0.613651	0.662125	0.476223	0.619816	0.43495	0.418377	0.622996	0.76882	0.644563	0.669055	0.62571	0.655642	0.506378	0.592064	0.585694	0.472577	0.531275	0.626236	0.670801	0.627458	0.619949	0.55131	0.68297	0.680788	0.694136	0.652909	0.750965	0.404298	0.582382	0.498197	0.585071	0.522742	0.688919	0.668732	0.601103
Cell_0080	TFEB_TR	EAA 1.000000e-01 X + Insulin 10000 ng/ml	1.08304	0.577995	2.42013	1.22852	1.98864	0.695999	0.863254	2.90866	0.870329	2.84828	1.05738	0.753088	1.69694	0.647851	0.576595	1.18056	2.14102	1.59463	1.29427	1.68631	0.691485	1.03847	1.50386	1.14459	1.15138	1.72721	0.560674	1.93221	1.07254	0.726034	0.930245	1.99312	1.11482	1.31707	1.36171	1.57002	1.35172	1.10938	3.00512	1.06579	1.10943	1.53586	1.61032	0.561685	0.60415	1.36534	0.842417
Cell_0080	FOXO_TR	EAA 1.000000e-01 X + Insulin 10000 ng/ml	1.25868	1.3353	2.59645	1.37516	2.80635	2.2317	1.44289	3.0997	1.73658	1.72587	2.48226	1.88202	1.9036	3.52989	1.61177	1.59988	2.59634	1.18475	2.38531	3.32387	1.09152	1.61551	2.87144	1.66033	1.90324	2.73689	1.45973	1.69248	2.34488	1.74004	1.1626	2.46158	2.70076	1.5413	3.03176	1.24238	2.90939	2.68547	1.8128	1.09561	1.77585	1.00768	1.91703	1.92276	1.26689	2.23704	1.36128
Cell_0080	AMPKARt2	EAA 1.000000e-01 X + Insulin 10000 ng/ml	0.418296	0.648698	0.490467	0.455493	0.511547	0.684552	0.596004	0.657452	0.726607	0.621474	0.620702	0.698762	0.609646	0.657039	0.479819	0.622942	0.430252	0.445961	0.632582	0.765259	0.657123	0.659808	0.64496	0.651845	0.502315	0.591349	0.581974	0.485355	0.543533	0.622545	0.674408	0.643839	0.60481	0.557012	0.69227	0.663424	0.691384	0.661269	0.749691	0.399692	0.578885	0.503216	0.589533	0.513897	0.669962	0.674352	0.570591
Cell_0081	TFEB_TR	EAA 1.000000e-01 X + Insulin 10000 ng/ml	1.05806	0.538015	2.16257	1.33572	1.50141	0.699574	0.88005	2.79324	0.675217	3.02508	1.04488	0.735015	1.57977	0.692642	0.575503	1.133	2.4196	1.58602	1.38165	1.67341	0.757465	1.08952	1.02033	1.274	1.11389	1.91963	0.626174	1.89065	0.897428	0.736266	0.97231	2.14969	1.06586	1.31827	1.25692	1.82887	1.28851	1.25827	1.8648	1.14079	1.09152	2.25582	1.56702	0.530029	0.58921	1.37632	0.850463
Cell_0081	FOXO_TR	EAA 1.000000e-01 X + Insulin 10000 ng/ml	1.27744	1.46055	2.62874	1.29973	2.79208	2.09928	1.48343	3.18677	2.47108	1.6922	2.45514	1.83295	1.92797	3.48841	1.63558	1.63829	2.5722	1.1835	2.3511	3.2943	1.12629	1.59219	2.86098	1.66908	1.95568	2.68827	1.39233	1.69867	2.36315	1.80834	1.20323	2.48714	2.69185	1.5286	3.06298	1.27345	2.49874	2.77752	1.81173	1.24048	1.76391	1.02428	1.95722	1.93458	1.27843	2.22923	1.31509
Cell_0081	AMPKARt2	EAA 1.000000e-01 X + Insulin 10000 ng/ml	0.420886	0.649121	0.471672	0.453028	0.502819	0.683937	0.592665	0.654033	0.589961	0.620673	0.605912	0.697774	0.612174	0.66389	0.477807	0.638747	0.453916	0.451033	0.643215	0.766031	0.653875	0.663165	0.619033	0.653535	0.501474	0.580948	0.584654	0.493942	0.532973	0.630118	0.66279	0.645745	0.608771	0.560453	0.680944	0.66695	0.698272	0.661329	0.756256	0.387829	0.586261	0.514094	0.599142	0.519953	0.675202	0.676523	0.55241
Cell_0082	TFEB_TR	EAA 1.000000e-01 X + Insulin 10000 ng/ml	1.09261	0.506662	2.01393	1.44809	2.74044	1.01939	0.880407	2.70384	0.682593	2.85727	0.950993	0.659568	1.38225	0.714742	0.586204	1.09266	2.54587	1.61026	1.3364	1.56583	0.754377	0.998801	1.18883	1.39008	1.3377	1.86679	0.652272	1.85347	1.03831	0.740425	1.0023	1.61025	1.07909	1.39868	1.16617	2.20213	1.26589	1.3898	1.0261	1.20268	1.11542	2.06563	1.59695	0.572497	0.593793	1.51309	0.883762
Cell_0082	FOXO_TR	EAA 1.000000e-01 X + Insulin 10000 ng/ml	1.29992	1.88308	2.67722	1.26745	2.71993	1.59805	1.53423	3.25297	2.45995	1.64442	2.41621	1.80105	1.86977	3.42761	1.67307	1.64436	2.39717	1.17139	2.39432	3.16337	1.1385	1.56267	2.8647	1.65916	2.06095	2.74175	1.34113	1.70199	2.33194	1.81503	1.21187	2.47007	2.65275	1.49913	2.9711	1.25925	2.1029	2.87059	1.81666	1.32884	1.77168	1.01505	1.97416	1.88241	1.38403	2.22987	1.39382
Cell_0082	AMPKARt2	EAA 1.000000e-01 X + Insulin 10000 ng/ml	0.428802	0.646578	0.46639	0.45699	0.492583	0.432026	0.587927	0.657546	0.587536	0.622714	0.600115	0.689757	0.627207	0.680842	0.495743	0.64076	0.457416	0.417137	0.631666	0.765496	0.645707	0.664469	0.608801	0.652082	0.511054	0.579043	0.591038	0.493096	0.523448	0.62998	0.645499	0.643079	0.618259	0.562261	0.6857	0.682836	0.706297	0.649606	0.764892	0.379596	0.585419	0.504437	0.595352	0.548571	0.675856	0.671749	0.562689
Cell_0083	TFEB_TR	EAA 1.000000e-01 X + Insulin 10000 ng/ml	1.23322	0.511807	0.699184	1.41918	3.25584	1.04564	0.874078	3.39843	0.657321	2.53246	0.887797	0.622872	1.54481	0.631504	0.600942	1.12432	2.23876	1.6024	1.28903	1.48488	0.708012	0.965055	1.2756	1.08781	1.5735	1.67538	0.647631	1.94884	1.86991	0.71856	0.972891	1.32606	1.03286	1.31588	1.24041	2.12889	1.33367	1.60848	1.10339	1.16468	1.11039	1.52469	1.68928	0.550135	0.617697	1.51612	0.88368
Cell_0083	FOXO_TR	EAA 1.000000e-01 X + Insulin 10000 ng/ml	1.28277	2.48599	1.254	1.2252	2.70066	1.65456	1.59446	3.16845	2.32303	1.63919	2.33398	1.82581	1.85685	3.29037	1.73906	1.6239	2.27949	1.18345	2.39238	3.15599	1.14582	1.52187	2.87954	1.63552	2.13152	2.77405	1.2956	1.65531	2.29142	1.75376	1.21132	2.40353	2.68726	1.5018	2.85709	1.26417	1.9023	2.89186	1.82992	1.26256	1.76354	0.991428	2.10853	1.81607	1.41174	2.29568	1.48071
Cell_0083	AMPKARt2	EAA 1.000000e-01 X + Insulin 10000 ng/ml	0.432409	0.664612	0.706781	0.45986	0.492634	0.444318	0.593192	0.660474	0.584253	0.620656	0.585865	0.69996	0.633246	0.680888	0.509828	0.6204	0.434744	0.425413	0.626095	0.762028	0.649182	0.661255	0.635678	0.643309	0.527194	0.587781	0.590908	0.478835	0.519373	0.61801	0.629474	0.656137	0.610708	0.561114	0.70095	0.687609	0.705777	0.642219	0.754515	0.368505	0.583872	0.486652	0.594711	0.553331	0.656949	0.66566	0.570238
Cell_0084	TFEB_TR	EAA 1.000000e-01 X + Insulin 10000 ng/ml	1.26854	0.537432	0.692198	1.19031	2.45714	1.00757	0.886975	3.71005	0.640429	2.354	0.941163	0.699048	1.57518	0.584938	0.612376	1.17427	1.98342	1.60367	1.41631	1.48873	0.74848	0.973606	1.13797	1.0143	1.42429	1.63689	0.698051	1.97802	2.12498	0.709757	0.96033	1.36044	1.07275	1.28041	1.12663	2.05014	1.28037	1.72743	1.22998	1.16438	1.06868	1.99398	1.72888	0.51911	0.644296	1.41086	0.858376
Cell_0084	FOXO_TR	EAA 1.000000e-01 X + Insulin 10000 ng/ml	1.26803	2.69709	1.22069	1.24343	2.60803	1.63995	1.68676	3.06777	2.22006	1.67996	2.32482	1.85065	1.88436	3.08321	1.82681	1.6047	2.24976	1.20027	2.32865	3.31012	1.18461	1.53858	2.87417	1.63746	2.08607	2.7734	1.25111	1.61124	2.29381	1.72269	1.22984	2.42053	2.73481	1.51879	2.72053	1.26961	1.77817	2.85936	1.80609	1.23134	1.73758	0.993729	2.16057	1.91864	1.31263	2.30508	1.59436
Cell_0084	AMPKARt2	EAA 1.000000e-01 X + Insulin 10000 ng/ml	0.425279	0.663046	0.697347	0.442358	0.494083	0.471423	0.598209	0.657963	0.578686	0.621441	0.574945	0.709389	0.632692	0.673917	0.496766	0.608647	0.435978	0.46967	0.639518	0.766763	0.655934	0.669503	0.646188	0.640233	0.524652	0.595706	0.59254	0.470259	0.495125	0.60837	0.642809	0.654297	0.597215	0.546287	0.69278	0.692388	0.702536	0.640273	0.73461	0.365302	0.583048	0.487938	0.594211	0.542631	0.648459	0.659335	0.568452
Cell_0085	TFEB_TR	EAA 1.000000e-01 X + Insulin 10000 ng/ml	1.166	0.553577	0.694215	1.03092	2.19636	0.980454	0.886365	2.70639	0.651042	2.33681	1.03529	0.768596	1.22556	0.63897	0.617912	1.17198	1.85626	1.63764	1.45713	1.52388	0.809179	0.960457	1.04265	1.27188	1.14115	1.71135	0.712155	1.74409	1.20125	0.721141	0.966948	1.26413	1.14757	1.19772	0.988803	2.20275	1.21084	1.55428	1.55329	1.19207	1.05471	2.43312	1.70902	0.627733	0.661709	1.29526	0.862036
Cell_0085	FOXO_TR	EAA 1.000000e-01 X + Insulin 10000 ng/ml	1.30242	2.47702	1.24781	1.32729	2.49031	1.65543	1.71944	3.01704	2.2008	1.73191	2.34193	1.83947	1.8329	3.00443	1.90829	1.58551	2.26345	1.19696	2.29016	3.37456	1.23721	1.6179	2.90235	1.65496	1.96821	2.76995	1.25593	1.62807	2.3446	1.77577	1.22041	2.46605	2.69696	1.52507	2.7069	1.25747	1.78925	2.7851	1.76404	1.23208	1.71071	0.986436	2.00282	1.92283	1.24831	2.39975	1.74048
Cell_0085	AMPKARt2	EAA 1.000000e-01 X + Insulin 10000 ng/ml	0.427591	0.647046	0.704908	0.442932	0.497095	0.487088	0.596767	0.654313	0.560569	0.625461	0.572007	0.701193	0.635796	0.685997	0.493815	0.61933	0.444559	0.479041	0.648492	0.776591	0.657861	0.677293	0.631839	0.641525	0.511236	0.595633	0.594207	0.476248	0.493135	0.604637	0.667995	0.6264	0.589087	0.543185	0.684729	0.694084	0.704605	0.64506	0.733383	0.378742	0.572903	0.507508	0.588042	0.545149	0.646852	0.6648	0.574154
Cell_0086	TFEB_TR	EAA 1.000000e-01 X + Insulin 10000 ng/ml	1.18319	0.558069	0.625269	1.18989	2.33803	1.0275	0.855894	2.05575	0.654819	2.42418	1.12008	0.757777	1.16666	0.617186	0.617297	1.12102	1.91598	1.62008	1.34848	1.52929	0.816793	1.06041	0.948471	1.19049	1.18618	1.47665	0.686939	1.67971	0.865897	0.728768	0.94477	1.44189	1.11119	1.11587	1.23344	2.22673	1.18146	1.36292	1.77961	1.16754	1.06236	1.7296	1.7131	0.690879	0.635043	1.21687	0.861924
Cell_0086	FOXO_TR	EAA 1.000000e-01 X + Insulin 10000 ng/ml	1.31024	2.30236	1.25409	1.33244	2.36953	1.68083	1.6729	2.91916	2.10368	1.76206	2.26055	1.83592	1.83292	2.8958	1.92734	1.57801	2.43036	1.18596	2.28138	3.37329	1.26334	1.67485	2.89006	1.6453	1.90492	2.71914	1.28689	1.6204	2.42261	1.83399	1.18983	2.44226	2.66987	1.54306	2.79579	1.30942	1.85217	2.66688	1.77234	1.16292	1.6551	0.962205	2.22229	1.83762	1.23392	2.74286	1.7727
Cell_0086	AMPKARt2	EAA 1.000000e-01 X + Insulin 10000 ng/ml	0.447368	0.651038	0.710594	0.471905	0.504021	0.477805	0.598145	0.660877	0.536144	0.627933	0.565109	0.708447	0.632411	0.691692	0.505937	0.628236	0.431342	0.465862	0.646246	0.772372	0.66077	0.668992	0.617959	0.637791	0.503064	0.587557	0.587743	0.470405	0.524291	0.602721	0.658337	0.61964	0.585171	0.569128	0.687044	0.687198	0.703668	0.661496	0.746778	0.389655	0.56788	0.511942	0.592942	0.546642	0.635798	0.683236	0.578785
Cell_0087	TFEB_TR	EAA 1.000000e-01 X + Insulin 10000 ng/ml	1.25188	0.558213	0.568074	1.45254	2.03216	1.063	0.839087	2.31347	0.656427	2.36744	1.21821	0.738384	1.48959	0.50754	0.621123	1.07484	2.42477	1.56166	1.35198	1.41356	0.849801	1.14066	1.06166	1.05222	1.38589	1.26696	0.691356	2.00627	1.31659	0.751175	0.93642	1.72	1.11004	1.27618	1.45975	2.16535	1.03537	1.17777	1.4108	1.1279	1.04053	1.24315	1.85076	0.618573	0.602902	1.45146	0.836167
Cell_0087	FOXO_TR	EAA 1.000000e-01 X + Insulin 10000 ng/ml	1.27164	2.1829	1.21959	1.33409	2.2008	1.63189	1.63346	2.80411	1.98544	1.75167	2.17956	1.82092	1.94658	2.68341	1.90205	1.58625	2.66333	1.17215	2.28239	3.41301	1.28839	1.73282	2.79671	1.61227	1.93026	2.66589	1.29603	1.52027	2.45168	1.86181	1.21505	2.44301	2.63959	1.51924	2.78874	1.39094	1.72329	2.58895	1.78508	1.11261	1.61791	0.970479	2.94952	1.88637	1.20408	3.00188	1.75071
Cell_0087	AMPKARt2	EAA 1.000000e-01 X + Insulin 10000 ng/ml	0.449782	0.650606	0.706406	0.473608	0.506575	0.474122	0.600224	0.664122	0.539869	0.633665	0.559653	0.719891	0.634989	0.678108	0.504236	0.62146	0.428869	0.469524	0.652347	0.761466	0.661933	0.660493	0.609132	0.62939	0.499096	0.578582	0.580243	0.461933	0.5311	0.604974	0.645328	0.643786	0.584927	0.576762	0.678246	0.690092	0.698662	0.670285	0.754285	0.395861	0.574786	0.501155	0.60453	0.543213	0.632448	0.685709	0.574193
Cell_0088	TFEB_TR	EAA 1.000000e-01 X + Insulin 10000 ng/ml	1.15974	0.540634	0.583092	1.53601	2.09302	1.04023	0.830221	2.05483	0.690622	2.11201	1.20524	0.715807	1.60175	0.491804	0.636991	1.05874	2.96653	1.56261	1.41349	1.31024	0.913436	1.05126	1.2944	1.24938	1.43843	1.54271	0.718593	2.10017	1.17508	0.791829	0.943155	1.46323	1.15137	1.27811	1.33844	2.26555	0.917546	0.965086	1.37469	1.12724	1.06127	1.91768	2.08068	0.612282	0.622381	1.80432	0.837644
Cell_0088	FOXO_TR	EAA 1.000000e-01 X + Insulin 10000 ng/ml	1.26723	1.90956	1.21517	1.4298	2.13104	1.62031	1.59451	2.77473	2.031	1.72881	2.18586	1.80678	2.01728	2.62673	1.90112	1.57609	2.68344	1.16094	2.31918	3.39515	1.35541	1.80862	2.84126	1.60105	1.95654	2.67903	1.28624	1.50212	2.42157	1.91777	1.23388	2.51124	2.51211	1.4203	2.78506	1.39108	1.68437	2.65704	1.77115	1.15871	1.65563	0.980248	3.35299	1.86129	1.18527	2.99096	1.69094
Cell_0088	AMPKARt2	EAA 1.000000e-01 X + Insulin 10000 ng/ml	0.431682	0.640147	0.708683	0.464972	0.502752	0.47432	0.593826	0.654523	0.570888	0.639873	0.567292	0.706051	0.650283	0.677743	0.497868	0.62134	0.443099	0.478078	0.661007	0.765381	0.656555	0.659315	0.604836	0.624774	0.510179	0.573676	0.574229	0.486576	0.520493	0.607139	0.66396	0.650938	0.587818	0.565533	0.671751	0.69856	0.706101	0.664724	0.749699	0.416127	0.582673	0.508356	0.604671	0.541192	0.638755	0.674213	0.573362
Cell_0089	TFEB_TR	EAA 1.000000e-01 X + Insulin 10000 ng/ml	1.04693	0.505873	0.592422	1.40963	2.4793	1.02321	0.790348	1.6753	0.73802	2.02026	1.01576	0.688641	1.36768	0.535126	0.64409	1.06811	3.13781	1.57534	1.37468	1.38377	0.947361	1.03201	1.32258	1.28998	1.39748	1.67432	0.768083	1.83864	1.09475	0.818567	0.928169	1.37666	1.15887	1.15091	1.25623	2.2701	0.990652	1.08293	1.61489	1.14425	1.14461	2.52807	2.1801	0.675612	0.658805	1.67974	0.922083
Cell_0089	FOXO_TR	EAA 1.000000e-01 X + Insulin 10000 ng/ml	1.27283	1.84691	1.22656	1.43002	2.20881	1.68792	1.56277	2.88015	2.1457	1.72742	2.19054	1.83319	2.04302	2.67146	1.92498	1.57842	2.6135	1.1716	2.32527	3.32682	1.42422	1.79395	3.00103	1.58733	1.98576	2.66399	1.26953	1.56705	2.38242	1.95603	1.15458	2.51867	2.38956	1.5242	2.83397	1.35503	2.10553	2.77466	1.77637	1.20435	1.69562	0.964477	3.22714	1.83453	1.18407	2.95396	1.97492
Cell_0089	AMPKARt2	EAA 1.000000e-01 X + Insulin 10000 ng/ml	0.433788	0.645425	0.714854	0.487435	0.503526	0.452213	0.594993	0.653518	0.58238	0.642214	0.581343	0.701674	0.647444	0.691159	0.503987	0.628405	0.438281	0.480642	0.647741	0.771973	0.652557	0.659431	0.602579	0.62564	0.528893	0.575849	0.568315	0.502426	0.522801	0.595589	0.66827	0.634373	0.590601	0.59721	0.679337	0.696544	0.718656	0.662239	0.737256	0.440543	0.590105	0.519702	0.602848	0.54195	0.637809	0.681426	0.739977
Cell_0090	TFEB_TR	EAA 1.000000e-01 X + Insulin 10000 ng/ml	1.07864	0.49126	0.637939	1.27136	2.34553	1.00817	0.763057	2.1869	0.754131	2.08316	0.942229	0.692518	1.11518	0.528	0.652881	1.08252	3.28497	1.54259	1.34656	1.40777	0.950137	1.11088	1.51591	1.12754	1.32368	1.58707	0.803766	1.70626	1.62549	0.835627	0.951626	1.72771	1.30283	1.43774	1.27238	2.04295	1.09814	1.50745	1.2272	1.11393	1.14545	2.1913	2.08553	0.941044	0.677994	1.36972	0.915841
Cell_0090	FOXO_TR	EAA 1.000000e-01 X + Insulin 10000 ng/ml	1.25296	2.17188	1.23227	1.47681	2.27007	1.71152	1.59709	3.01675	2.09839	1.72114	2.15959	1.8174	2.10472	2.66763	1.97443	1.62596	2.6865	1.2011	2.27411	3.22269	1.4322	1.75898	3.05039	1.54491	2.09259	2.61039	1.28242	1.54841	2.30444	1.89812	1.17226	2.45387	2.34218	2.0449	2.7445	1.34914	2.60986	2.79557	1.76662	1.19741	1.67824	0.969425	3.11725	1.52946	1.18652	2.96151	1.91789
Cell_0090	AMPKARt2	EAA 1.000000e-01 X + Insulin 10000 ng/ml	0.453686	0.644624	0.711676	0.49652	0.514039	0.435341	0.609567	0.664493	0.574204	0.646558	0.588215	0.718428	0.637447	0.695309	0.517004	0.617447	0.421007	0.481693	0.634453	0.768606	0.653562	0.668433	0.602366	0.620861	0.523971	0.585806	0.568939	0.477014	0.523334	0.57411	0.64956	0.629179	0.584094	0.640836	0.68214	0.691948	0.716181	0.660184	0.729152	0.451119	0.591897	0.520869	0.613974	0.647634	0.634872	0.695289	0.749872
Cell_0091	TFEB_TR	EAA 1.000000e-01 X + Insulin 10000 ng/ml	1.2117	0.523317	0.706349	1.34707	2.30439	1.00085	0.789583	2.58262	0.744691	2.05887	1.08827	0.696298	1.0627	0.538093	0.705695	1.04627	3.39877	1.57903	1.358	1.29304	0.925199	1.0302	1.84959	1.2449	1.22855	1.97337	0.83198	1.70165	1.54736	0.86285	1.01389	1.61333	1.48702	1.61378	1.15759	2.11338	1.14793	1.72936	0.995232	1.05277	0.956118	1.67541	1.9553	1.25772	0.678222	1.51768	0.937274
Cell_0091	FOXO_TR	EAA 1.000000e-01 X + Insulin 10000 ng/ml	1.26201	2.32077	1.2718	1.90456	2.35895	1.74602	1.64226	3.01814	1.89645	1.69877	2.11792	1.78965	2.13339	2.73408	2.07781	1.66035	2.71114	1.2236	2.3204	3.06479	1.41547	1.7752	3.03142	1.52568	2.18338	2.69697	1.32546	1.77296	2.23123	1.80468	1.46777	2.43457	2.31893	2.61706	2.61734	1.3365	2.74001	2.75923	1.72417	1.21079	1.52157	0.980347	3.07164	1.56254	1.19362	2.99006	1.9239
Cell_0091	AMPKARt2	EAA 1.000000e-01 X + Insulin 10000 ng/ml	0.455358	0.632087	0.705677	0.477357	0.518593	0.444372	0.612207	0.67019	0.584032	0.650417	0.587317	0.714067	0.651116	0.695139	0.517215	0.608453	0.421034	0.47718	0.651534	0.769931	0.653675	0.673609	0.608205	0.614045	0.512786	0.59079	0.570825	0.488319	0.526345	0.567062	0.656929	0.631406	0.574545	0.631641	0.679122	0.687039	0.709096	0.659357	0.737482	0.454216	0.527125	0.537234	0.619526	0.644583	0.641576	0.686626	0.751923
Cell_0092	TFEB_TR	EAA 1.000000e-01 X + Insulin 10000 ng/ml	1.29856	0.571051	0.671943	1.38088	2.72176	1.07557	0.827993	2.34993	0.735063	2.02451	1.09747	0.741532	1.23331	0.558139	0.782736	0.987654	3.07657	1.68938	1.35454	1.29162	0.926985	0.897768	1.58111	1.53804	1.22992	2.2227	0.914599	1.76278	1.15351	0.896914	1.01567	1.42668	1.37351	1.25509	1.11826	2.44123	1.15218	0.90269	1.56342	1.04691	0.980517	1.74087	1.86165	1.02156	0.678801	1.81219	0.989289
Cell_0092	FOXO_TR	EAA 1.000000e-01 X + Insulin 10000 ng/ml	1.28061	2.12758	1.32845	2.31571	2.52617	1.86699	1.66347	3.00571	1.81786	1.66624	2.08016	1.89211	2.11868	2.82898	2.1945	1.67948	2.57545	1.22011	2.37198	3.04663	1.4402	1.66088	3.00219	1.53275	2.21644	2.89003	1.32371	2.38202	2.26763	1.75662	1.81265	2.4664	2.34704	2.83423	2.6653	1.31885	2.67429	1.43478	1.71363	1.2487	1.5005	0.973274	2.93368	1.57289	1.18874	3.05013	1.96945
Cell_0092	AMPKARt2	EAA 1.000000e-01 X + Insulin 10000 ng/ml	0.440544	0.642497	0.707171	0.474653	0.505441	0.449251	0.600988	0.673142	0.59167	0.649968	0.58388	0.697284	0.659893	0.697401	0.497151	0.619451	0.435232	0.471496	0.667883	0.775593	0.657028	0.653912	0.608189	0.616469	0.529927	0.586917	0.565445	0.551647	0.53258	0.579106	0.676881	0.62184	0.589897	0.612237	0.683831	0.676323	0.709994	0.556642	0.75468	0.454602	0.541567	0.544562	0.604851	0.646412	0.651498	0.673076	0.754042
Cell_0093	TFEB_TR	EAA 1.000000e-01 X + Insulin 10000 ng/ml	1.17894	0.582753	0.642339	1.15004	2.9564	1.1344	0.837928	2.32364	0.729068	1.95441	1.0253	0.838337	1.44487	0.523559	0.86552	1.01517	2.69315	1.75959	1.35919	1.35465	1.00869	0.961184	1.08366	1.67036	1.33245	1.81156	0.99962	1.84356	1.47875	0.93485	0.990306	1.73447	1.10403	1.05155	0.816002	2.1969	1.13892	0.976951	2.0189	1.06429	1.04457	2.02114	1.79108	0.928883	0.699939	1.73644	1.00964
Cell_0093	FOXO_TR	EAA 1.000000e-01 X + Insulin 10000 ng/ml	1.28123	2.0544	1.36521	2.21858	2.58177	1.89462	1.68741	3.12083	2.01448	1.63163	2.095	2.00091	2.10716	2.79528	2.24511	1.66537	2.47033	1.21139	2.24112	3.1507	1.46992	1.572	3.01653	1.53248	2.37605	2.97578	1.27385	2.70041	2.3006	1.76464	2.01022	2.49383	2.40327	2.82612	1.51006	1.32955	2.68412	1.49596	1.71663	1.25053	1.49745	0.987049	2.87582	1.59998	1.18717	2.98837	1.97828
Cell_0093	AMPKARt2	EAA 1.000000e-01 X + Insulin 10000 ng/ml	0.434475	0.66355	0.711803	0.482093	0.496752	0.440649	0.591528	0.673816	0.569956	0.647111	0.57632	0.703428	0.651329	0.699299	0.489838	0.617689	0.444605	0.471338	0.660091	0.774275	0.668593	0.643998	0.594719	0.615015	0.535091	0.586316	0.562516	0.562457	0.517349	0.581954	0.6682	0.617949	0.616203	0.617332	0.453337	0.672433	0.711329	0.581757	0.756786	0.450262	0.547703	0.517207	0.605397	0.655009	0.653738	0.677754	0.759442
Cell_0094	TFEB_TR	EAA 1.000000e-01 X + Insulin 10000 ng/ml	0.995961	0.552311	0.718814	1.14116	3.26707	1.10044	0.822175	2.34365	0.739376	1.81292	1.23816	0.821014	1.50053	0.524219	0.991083	1.07915	2.78171	1.82985	1.33121	1.30322	1.04435	1.12216	1.17001	1.62469	1.36266	1.74059	1.09446	1.70315	1.61769	0.968786	1.00693	0.46323	1.09311	1.11655	0.838729	1.75138	1.20715	1.04255	1.80601	1.02711	1.0411	2.09813	1.77676	1.16182	0.662766	1.50791	0.986403
Cell_0094	FOXO_TR	EAA 1.000000e-01 X + Insulin 10000 ng/ml	1.30358	2.12533	1.3794	1.86187	2.55174	1.79114	1.67402	3.16871	2.20073	1.67115	2.14418	1.97154	2.04921	2.72451	2.19379	1.58072	2.46079	1.25977	2.35439	3.11259	1.44916	1.86751	3.22444	1.51065	2.62315	3.01598	1.25213	2.55929	2.2278	1.81196	2.1648	1.64599	2.37094	2.83315	1.53233	1.33508	2.71638	1.50423	1.7013	1.2278	1.49802	1.00333	2.90791	1.64678	1.1967	2.86156	1.96735
Cell_0094	AMPKARt2	EAA 1.000000e-01 X + Insulin 10000 ng/ml	0.442168	0.664894	0.707455	0.477154	0.509055	0.427357	0.587685	0.664164	0.560846	0.638127	0.572649	0.711586	0.652134	0.704716	0.509294	0.608101	0.439174	0.47445	0.662748	0.769731	0.673192	0.668971	0.58397	0.604462	0.493306	0.584265	0.56853	0.513524	0.507963	0.567604	0.648084	0.632884	0.611071	0.609539	0.442885	0.682248	0.711433	0.600841	0.739717	0.448254	0.553163	0.507288	0.631749	0.649564	0.657589	0.684028	0.764831
Cell_0095	TFEB_TR	EAA 1.000000e-01 X + Insulin 10000 ng/ml	1.03458	0.52216	0.72519	1.40928	3.61819	1.21251	0.810307	2.25489	0.772514	1.76802	1.36945	0.753506	1.59597	0.586349	1.11903	1.07143	2.95393	1.91421	1.26918	1.24446	0.968124	1.17965	1.29203	1.41265	1.3188	2.0673	1.16226	1.67792	0.744066	0.993604	1.00378	0.454034	1.29072	1.05963	0.910264	2.10126	1.26126	1.06599	1.49918	0.992083	0.978052	2.21268	1.77248	1.15341	0.565424	1.48698	0.990978
Cell_0095	FOXO_TR	EAA 1.000000e-01 X + Insulin 10000 ng/ml	1.29541	2.04326	1.36094	1.59302	2.5645	1.7583	1.65074	3.08122	2.127	1.71668	2.17163	1.94601	2.05028	2.7641	2.08702	1.70298	2.52117	1.38598	2.97977	3.01185	1.41862	2.27074	3.42977	1.4314	2.73717	3.18336	1.27091	2.55232	2.71553	1.86925	2.27652	1.74952	2.29716	2.84205	1.55975	1.31526	2.68801	1.50329	1.71457	1.21708	1.50763	0.992673	2.85568	1.71409	1.17579	2.93334	2.00086
Cell_0095	AMPKARt2	EAA 1.000000e-01 X + Insulin 10000 ng/ml	0.451956	0.653298	0.691704	0.476574	0.514325	0.408424	0.596761	0.656128	0.581706	0.63268	0.584587	0.701226	0.652173	0.709214	0.517567	0.618832	0.431323	0.485749	0.687553	0.763953	0.660709	0.676692	0.578963	0.599345	0.460839	0.583579	0.573226	0.496346	0.655554	0.565717	0.647097	0.620991	0.596919	0.592196	0.439403	0.686861	0.710385	0.603562	0.731724	0.451942	0.561341	0.526703	0.633276	0.632774	0.674141	0.675383	0.768642
Cell_0096	TFEB_TR	EAA 1.000000e-01 X + Insulin 10000 ng/ml	1.17177	0.527767	0.671948	1.34391	2.89956	1.51416	0.804715	2.4465	0.802985	1.73888	1.08645	0.831139	1.77829	0.612461	1.16762	1.05975	2.64594	1.98406	1.24035	1.23583	0.949313	1.1365	1.04579	1.22992	1.34707	1.3533	0.99064	2.00597	1.2668	1.02301	0.987194	0.447943	1.31656	1.04863	0.923845	2.52199	1.15858	0.999717	1.68957	1.02419	0.955347	2.23118	1.7278	1.09532	0.565509	1.55615	1.02463
Cell_0096	FOXO_TR	EAA 1.000000e-01 X + Insulin 10000 ng/ml	1.24678	1.89226	1.34796	1.46325	2.48186	1.76633	1.6182	2.99303	1.99007	1.64546	2.21585	1.96112	2.25084	2.86793	2.01881	2.21718	2.58919	1.52929	3.42802	2.96898	1.41515	2.39141	3.37812	1.3545	2.79741	2.20763	1.29495	2.70991	2.61252	1.9103	2.28862	1.68269	2.28908	2.83212	1.56236	1.31258	2.66852	1.48524	1.73643	1.23308	1.53106	0.995186	2.80255	1.80562	1.14371	3.08861	2.03145
Cell_0096	AMPKARt2	EAA 1.000000e-01 X + Insulin 10000 ng/ml	0.454562	0.644554	0.682705	0.487187	0.500857	0.399614	0.607281	0.651734	0.585726	0.644439	0.594761	0.694258	0.648292	0.704517	0.50438	0.622325	0.443593	0.496762	0.702413	0.76008	0.649231	0.646578	0.569083	0.595891	0.460045	0.533736	0.571503	0.518186	0.659172	0.580826	0.658504	0.625271	0.608347	0.585039	0.449901	0.677832	0.704968	0.597571	0.745773	0.455341	0.562245	0.528898	0.610511	0.636414	0.687304	0.665129	0.766229
Cell_0097	TFEB_TR	EAA 1.000000e-01 X + Insulin 10000 ng/ml	1.20806	0.548353	0.784009	1.09006	2.09881	1.64925	0.776312	2.0229	0.828532	1.72675	0.961584	0.880342	1.69564	0.600383	1.17941	1.11206	2.13562	2.13957	1.30084	1.21586	1.02168	1.13254	1.26115	1.4048	1.38662	1.38471	0.817038	2.10147	1.05937	1.04856	1.01973	0.437079	1.18255	1.09763	0.831991	2.15517	1.07458	0.926621	1.95566	1.0876	0.986892	1.80929	1.77818	1.26414	0.615087	1.49723	1.01327
Cell_0097	FOXO_TR	EAA 1.000000e-01 X + Insulin 10000 ng/ml	1.27192	1.87492	1.37455	1.3763	2.30874	1.68549	1.53165	2.88506	1.93223	1.77625	2.25893	1.88371	2.44221	2.89697	2.02013	2.67662	2.57244	1.60629	3.36079	2.86493	1.41582	2.37976	1.81764	1.38056	2.92184	2.35253	1.31401	2.76564	2.67576	1.92623	2.28608	1.52872	2.25577	2.85243	1.51737	1.3299	2.70659	1.42443	1.71534	1.29538	1.55482	1.01262	2.91062	1.83919	1.14323	3.04269	2.00004
Cell_0097	AMPKARt2	EAA 1.000000e-01 X + Insulin 10000 ng/ml	0.449158	0.649554	0.690705	0.494469	0.501045	0.410261	0.601849	0.639684	0.57324	0.65806	0.585348	0.700135	0.662531	0.697371	0.493735	0.608935	0.464232	0.483846	0.700184	0.764728	0.653298	0.634662	0.572382	0.587446	0.437604	0.547459	0.573791	0.536433	0.654261	0.586757	0.658602	0.640828	0.615483	0.577578	0.473921	0.680164	0.705712	0.597146	0.753762	0.460896	0.560347	0.521985	0.605633	0.647703	0.688167	0.665867	0.760151
Cell_0098	TFEB_TR	EAA 1.000000e-01 X + Insulin 10000 ng/ml	1.25314	0.555535	0.963812	1.14005	3.13709	1.51676	0.763467	1.2767	0.870889	1.96722	1.1649	0.788747	1.54003	0.589907	1.21369	1.16777	2.16	2.27405	1.47813	4.78012	1.06101	1.18788	1.20936	1.57716	1.37071	1.49585	0.980189	1.88739	0.838866	1.05133	1.01851	0.427452	1.20993	1.04003	0.790648	1.84115	1.0816	0.972652	1.66855	1.13792	1.03748	1.56878	1.93331	1.26954	0.562078	1.54571	0.960561
Cell_0098	FOXO_TR	EAA 1.000000e-01 X + Insulin 10000 ng/ml	1.28425	1.94116	1.37542	1.28398	2.24553	1.60415	1.67787	2.80375	1.87444	2.32672	2.20101	1.80334	2.47692	2.8759	2.0597	2.74223	2.64715	1.55995	3.33423	2.12987	1.42475	2.3733	1.80907	1.42956	3.0103	2.47393	1.30883	2.84676	2.62063	1.94923	2.25571	1.48135	2.12572	2.82302	1.46477	1.32995	2.71232	1.39706	1.69783	1.38308	1.58754	1.0224	3.05685	1.82201	1.13413	2.91383	1.94931
Cell_0098	AMPKARt2	EAA 1.000000e-01 X + Insulin 10000 ng/ml	0.441668	0.657769	0.69429	0.493195	0.512845	0.425226	0.605446	0.639733	0.581897	0.663524	0.56924	0.706737	0.672153	0.697507	0.48869	0.607972	0.472856	0.462868	0.701142	0.589771	0.660624	0.653357	0.58083	0.582791	0.402549	0.558218	0.584383	0.545937	0.66027	0.583402	0.646236	0.64615	0.603052	0.584172	0.491971	0.695562	0.716798	0.59831	0.739055	0.47566	0.568904	0.528022	0.603454	0.640301	0.689189	0.674891	0.758133
Cell_0099	TFEB_TR	EAA 1.000000e-01 X + Insulin 10000 ng/ml	1.25668	0.56178	1.00809	1.31951	4.1182	1.3647	0.82258	2.05261	0.910734	2.20499	1.13898	0.781373	1.5844	0.590392	1.22855	1.17566	2.35507	2.18246	1.5893	4.96211	1.09924	1.16748	1.1626	1.33283	1.41333	1.58838	1.07303	1.79935	0.904187	1.04809	0.943367	0.43333	1.31412	1.02384	0.930001	1.98149	0.99379	1.03573	1.22135	1.17396	1.04226	1.95569	1.94597	1.10809	0.509244	1.8504	0.961784
Cell_0099	FOXO_TR	EAA 1.000000e-01 X + Insulin 10000 ng/ml	1.20525	1.94056	1.34477	1.56421	2.27178	1.56781	2.19275	2.80671	1.91103	2.77702	2.14532	1.86572	2.5036	2.92214	2.09	2.68478	1.50669	1.4296	3.47846	2.07754	1.44407	2.33927	1.81424	1.4069	3.01736	2.45817	1.26116	2.90329	2.44033	1.9871	2.17137	1.58709	2.03415	2.6841	1.46312	1.33557	2.62877	1.4276	1.72237	1.44842	1.60427	1.03884	3.0397	1.86636	1.10981	2.97343	1.93001
Cell_0099	AMPKARt2	EAA 1.000000e-01 X + Insulin 10000 ng/ml	0.445308	0.649297	0.682945	0.493823	0.505682	0.440639	0.63048	0.658065	0.590313	0.67253	0.558799	0.708792	0.658385	0.706614	0.486833	0.609111	0.532184	0.462897	0.705708	0.57249	0.65886	0.65902	0.582432	0.585569	0.3987	0.550155	0.587705	0.546805	0.670718	0.584488	0.645216	0.637772	0.598668	0.603954	0.493555	0.686935	0.720531	0.599398	0.730833	0.488775	0.575173	0.52737	0.594755	0.637897	0.690279	0.68423	0.754818
Cell_0100	TFEB_TR	EAA 1.000000e-01 X + Insulin 10000 ng/ml	1.07641	0.556043	1.01939	1.40172	2.83078	1.35949	0.945953	2.82806	0.922736	2.12742	0.962292	0.85428	1.46361	1.42424	1.21687	1.15857	2.02125	2.07669	1.50328	4.39392	1.16629	1.08227	1.13606	1.22861	1.45336	1.6117	0.917598	1.69316	0.859273	1.0511	0.904458	0.440477	1.21247	1.0135	1.06379	1.95452	0.923825	1.01706	1.13355	1.22624	1.00421	2.15082	1.83954	1.18376	0.529246	1.89194	1.02079
Cell_0100	FOXO_TR	EAA 1.000000e-01 X + Insulin 10000 ng/ml	1.33258	1.84525	1.34809	2.36527	2.26645	1.54449	2.57352	2.7071	2.05868	2.79822	2.24064	1.94104	2.49707	2.16379	2.04807	2.69791	1.56604	1.33698	3.45923	2.03148	1.44463	2.33855	1.76916	1.36729	2.92352	2.33456	1.2144	2.78283	2.42334	1.95944	2.1242	1.69301	2.05486	2.61371	1.5061	1.36262	2.55137	1.44027	1.73478	1.50743	1.56486	1.049	2.9569	1.91251	1.13306	3.04545	1.96033
Cell_0100	AMPKARt2	EAA 1.000000e-01 X + Insulin 10000 ng/ml	0.473131	0.645477	0.680178	0.508244	0.495647	0.451646	0.642706	0.659159	0.577165	0.676857	0.567378	0.711555	0.653332	0.49898	0.491561	0.59953	0.54023	0.462373	0.701772	0.5932	0.655169	0.649338	0.579657	0.588337	0.399605	0.536979	0.577916	0.542993	0.667092	0.586909	0.66359	0.63185	0.605906	0.602336	0.495074	0.670194	0.710836	0.608955	0.743545	0.489501	0.570103	0.509728	0.598258	0.648576	0.687493	0.681881	0.745264
Cell_0101	TFEB_TR	EAA 1.000000e-01 X + Insulin 10000 ng/ml	0.986597	0.537547	1.08093	1.4485	1.87513	1.49126	1.10059	1.72013	0.936366	2.00403	0.925566	0.864531	1.24224	1.4632	1.21182	1.1908	2.03048	2.15895	1.38021	3.85919	1.19211	1.07514	1.15173	1.49766	1.3647	1.62773	0.967781	1.56853	0.879141	1.04801	0.911841	0.433475	1.10551	0.947534	0.976511	1.85673	1.06569	1.04072	1.2972	1.30021	1.03132	1.72593	1.90481	1.38216	0.538524	1.53007	1.05366
Cell_0101	FOXO_TR	EAA 1.000000e-01 X + Insulin 10000 ng/ml	1.71697	1.77234	1.3385	2.95446	2.23404	1.59495	2.59647	2.52433	2.09046	2.71371	1.62385	1.88187	2.39401	2.21987	1.95605	2.67844	1.54762	1.31729	3.35302	2.06796	1.43549	2.33242	1.70874	1.35591	2.71184	2.23815	1.19438	2.71074	2.46325	1.89388	2.07976	1.70397	2.09602	2.67936	1.53295	1.3522	2.573	1.4385	1.70139	1.58482	1.54134	1.04041	3.0279	1.88711	1.18306	2.86983	2.01346
Cell_0101	AMPKARt2	EAA 1.000000e-01 X + Insulin 10000 ng/ml	0.513455	0.659738	0.692607	0.525164	0.5055	0.441202	0.631807	0.642978	0.578923	0.664934	0.545487	0.722216	0.663954	0.512465	0.496773	0.596953	0.553722	0.446245	0.698576	0.610026	0.656318	0.646527	0.587327	0.580133	0.386319	0.541732	0.573367	0.538464	0.665288	0.587519	0.684359	0.629308	0.612222	0.593332	0.495502	0.686832	0.703107	0.618659	0.744876	0.490783	0.575855	0.490999	0.587749	0.639123	0.684169	0.671375	0.734862
Cell_0102	TFEB_TR	EAA 1.000000e-01 X + Insulin 10000 ng/ml	1.1698	0.565161	1.113	1.41455	2.94201	1.63863	1.20439	1.88716	0.971457	2.00842	1.05338	0.888855	1.28969	1.50757	1.19621	1.26525	1.9414	2.21838	1.22616	3.8565	1.17747	1.11814	1.20101	1.53624	1.31116	1.63552	1.11026	1.75772	0.964166	1.04128	0.888035	0.433237	1.24764	1.03198	0.864247	1.903	1.18427	1.10236	1.40746	1.33652	1.1416	1.33574	2.07881	1.39522	0.565205	1.38229	1.11164
Cell_0102	FOXO_TR	EAA 1.000000e-01 X + Insulin 10000 ng/ml	1.9286	1.80325	1.2916	2.94454	2.30507	1.6709	2.5783	2.41884	2.04069	2.66461	1.78239	1.80028	2.35997	2.23647	1.94016	2.61441	1.51421	1.32333	3.30631	2.19914	1.42314	2.28354	1.74264	1.36877	2.54686	2.17015	1.16282	2.80017	2.39492	1.91591	2.00721	1.73042	2.09689	2.70265	1.50031	1.32033	2.6808	1.49144	1.6781	1.62489	1.59075	1.03336	3.16391	1.88217	1.2149	2.78084	2.03652
Cell_0102	AMPKARt2	EAA 1.000000e-01 X + Insulin 10000 ng/ml	0.534077	0.661509	0.697618	0.523314	0.521001	0.426555	0.620827	0.43318	0.599902	0.651453	0.566637	0.72888	0.663134	0.506372	0.498174	0.60096	0.553927	0.44782	0.705844	0.609986	0.658149	0.645424	0.602076	0.571509	0.384043	0.549266	0.581033	0.520594	0.673562	0.584325	0.690662	0.624347	0.618708	0.603362	0.484715	0.700863	0.704069	0.615765	0.73342	0.49377	0.589377	0.492385	0.564198	0.619204	0.68043	0.670681	0.725622
Cell_0103	TFEB_TR	EAA 1.000000e-01 X + Insulin 10000 ng/ml	1.29415	0.611668	1.11955	1.21318	1.18957	1.74883	1.21943	1.9083	0.979754	2.00415	1.08528	0.913498	1.42641	1.4978	1.19366	1.25741	1.64553	2.14516	1.08654	3.64298	1.12508	1.09652	1.20284	1.35868	1.41303	1.63535	1.04132	1.89493	0.868943	1.03516	0.854113	0.448259	1.34485	1.14252	0.899166	1.83229	1.15019	1.09973	1.24342	1.31133	1.24905	1.22828	2.06689	1.25709	0.608773	1.44649	1.23235
Cell_0103	FOXO_TR	EAA 1.000000e-01 X + Insulin 10000 ng/ml	1.9068	1.88244	1.29999	2.86469	2.09327	1.66684	2.55076	2.44469	2.08075	2.59665	1.83452	1.83054	2.3822	2.24211	2.0415	2.55324	1.54981	1.33802	3.23862	2.30996	1.4006	2.3094	1.83739	1.40758	2.45931	2.14149	1.1365	2.85588	2.34105	1.95772	2.01154	1.80523	2.09059	2.67733	1.44588	1.33877	2.78805	1.60661	1.69085	1.59843	1.61838	1.03996	3.1399	1.88743	1.25572	2.95733	2.07653
Cell_0103	AMPKARt2	EAA 1.000000e-01 X + Insulin 10000 ng/ml	0.527498	0.655776	0.690252	0.513348	0.720157	0.436928	0.617775	0.468874	0.60227	0.644281	0.570878	0.717204	0.656375	0.502067	0.497076	0.605931	0.54241	0.46706	0.706032	0.623647	0.660148	0.651623	0.603555	0.580168	0.382937	0.545886	0.588161	0.503865	0.672508	0.577515	0.680618	0.629283	0.623622	0.607849	0.483874	0.687236	0.704354	0.608553	0.740825	0.484802	0.581741	0.513139	0.573761	0.625514	0.681042	0.674038	0.723433
Cell_0104	TFEB_TR	EAA 1.000000e-01 X + Insulin 10000 ng/ml	1.19631	0.640119	1.11373	1.09553	1.14578	1.8235	1.22852	1.82134	0.932946	2.00186	1.10827	0.868003	1.52627	1.51203	1.2261	1.19698	1.65396	2.08209	1.26661	3.13006	1.07491	1.03649	1.1287	1.30086	1.49212	1.67559	1.0267	1.61915	0.931355	1.02666	0.853565	0.4542	1.21826	1.01608	0.911776	1.75328	1.18278	1.13095	1.02846	1.31054	1.27888	1.21186	1.93389	1.14729	0.574534	1.29341	1.27623
Cell_0104	FOXO_TR	EAA 1.000000e-01 X + Insulin 10000 ng/ml	1.92253	1.48544	1.337	2.9777	2.03625	1.65079	2.4222	2.5056	2.08633	2.6105	1.84342	1.8926	2.33134	2.21351	2.12708	2.49294	1.58949	1.31489	3.21475	2.27119	1.40412	2.36552	1.89428	1.4547	2.20388	2.23352	1.14035	2.79215	2.27942	1.9533	2.04375	1.83825	2.1331	2.67875	1.47087	1.33861	2.78126	1.72376	1.70059	1.59876	1.59798	1.06839	3.03085	1.84405	1.24728	2.92702	2.17376
Cell_0104	AMPKARt2	EAA 1.000000e-01 X + Insulin 10000 ng/ml	0.514312	0.709011	0.682318	0.519032	0.714082	0.451644	0.619818	0.459577	0.593456	0.637363	0.574508	0.704403	0.666255	0.510294	0.493797	0.613712	0.536468	0.465573	0.694401	0.63302	0.660917	0.674232	0.59637	0.582049	0.367545	0.543306	0.588467	0.50951	0.663899	0.579772	0.674103	0.645472	0.619963	0.593686	0.492062	0.686529	0.697715	0.6059	0.748391	0.48159	0.571187	0.525534	0.590365	0.637884	0.688006	0.671282	0.733331
Cell_0105	TFEB_TR	EAA 1.000000e-01 X + Insulin 10000 ng/ml	1.10619	0.623096	1.07285	1.359	1.30561	1.72356	1.21595	1.6953	0.879821	2.05683	1.11851	0.857563	1.51329	1.59385	1.22867	1.21013	1.9288	2.07304	1.51201	2.93806	1.12854	1.03213	1.16149	1.27068	1.40566	1.71037	1.0782	1.47565	1.08584	1.03277	0.876077	0.450404	1.2253	0.864743	0.915889	1.74358	1.22838	1.19929	0.910489	1.38458	1.26548	1.45245	1.92886	1.21402	0.519632	1.22197	1.27489
Cell_0105	FOXO_TR	EAA 1.000000e-01 X + Insulin 10000 ng/ml	1.9242	1.39612	1.32845	3.06651	2.08955	1.6594	2.30318	2.53429	1.99794	2.61396	1.83423	1.85408	2.3743	2.12143	2.08093	2.44531	1.53382	1.2504	3.26625	2.12454	1.4166	2.34607	1.94794	1.49249	1.81862	2.34742	1.11124	2.66802	2.14643	1.99782	1.9872	1.86011	2.18478	2.65878	1.57214	1.28316	2.68247	1.75661	1.72569	1.70805	1.62576	1.06761	3.01953	1.83909	1.1746	2.7077	2.21942
Cell_0105	AMPKARt2	EAA 1.000000e-01 X + Insulin 10000 ng/ml	0.503856	0.693242	0.676123	0.530788	0.720609	0.448579	0.62732	0.455864	0.594104	0.635665	0.58313	0.705955	0.675052	0.514857	0.493506	0.611794	0.538119	0.456059	0.696233	0.621553	0.654732	0.680223	0.599585	0.568711	0.354405	0.543659	0.585152	0.515	0.667396	0.587212	0.677938	0.644876	0.611557	0.584094	0.480393	0.698096	0.690683	0.606538	0.738123	0.497392	0.586145	0.522518	0.577816	0.625839	0.692376	0.677788	0.737537
Cell_0106	TFEB_TR	EAA 1.000000e-01 X + Insulin 10000 ng/ml	1.0943	0.666037	1.03455	1.57318	1.21589	1.50614	1.1187	1.7009	0.850634	2.08944	1.04184	0.877759	1.30016	1.61646	1.21756	1.19784	1.99507	2.06774	1.37783	2.79883	1.18083	1.08392	1.32527	1.31853	1.25511	1.69489	0.998043	1.72515	0.913867	1.05298	0.903826	0.45193	1.40862	0.9219	1.02661	1.82597	1.13656	1.1544	0.850806	1.44697	1.42575	1.80109	1.99988	1.36312	0.542094	1.38936	1.39098
Cell_0106	FOXO_TR	EAA 1.000000e-01 X + Insulin 10000 ng/ml	1.85409	1.40955	1.36547	3.06689	2.17491	1.63948	2.16552	2.48492	1.97882	2.48144	1.76655	1.72445	2.60678	2.06947	2.02308	2.38752	1.4586	1.26278	3.22261	2.10027	1.38856	2.34116	2.03971	1.51765	1.62362	2.38847	1.04795	2.57275	2.10681	1.9855	1.89893	1.90464	2.18887	2.69441	1.6012	1.30173	2.66499	1.70294	1.74416	1.86307	1.67098	1.01607	3.08839	1.89559	1.32211	2.73705	2.18941
Cell_0106	AMPKARt2	EAA 1.000000e-01 X + Insulin 10000 ng/ml	0.495274	0.702001	0.676565	0.528681	0.73147	0.448315	0.633762	0.494908	0.588064	0.644216	0.58179	0.714265	0.658069	0.515637	0.500791	0.603806	0.544777	0.471001	0.710177	0.620666	0.649711	0.656994	0.608598	0.576793	0.34501	0.548842	0.583521	0.509631	0.674979	0.583904	0.664877	0.618655	0.610413	0.585652	0.465193	0.698478	0.689304	0.61229	0.739378	0.503782	0.596294	0.52097	0.570761	0.614491	0.691246	0.693548	0.723873
Cell_0107	TFEB_TR	EAA 1.000000e-01 X + Insulin 10000 ng/ml	1.073	0.647509	0.995466	1.33212	1.05291	1.46616	1.05982	1.88737	0.8224	1.98557	1.01825	0.8452	1.28907	1.55726	1.24808	1.10772	1.91376	2.04109	1.26319	2.32452	1.09578	1.10928	1.28635	1.33917	1.20688	1.71761	1.05686	1.77972	0.871086	1.05275	0.911519	0.451786	1.39507	1.00919	1.13869	2.28277	1.07019	1.10883	1.2464	1.49165	1.75607	1.85806	1.99834	1.36369	0.606516	1.33166	1.50165
Cell_0107	FOXO_TR	EAA 1.000000e-01 X + Insulin 10000 ng/ml	1.84845	1.38126	1.46922	3.02928	2.1901	1.63383	2.01354	2.40785	2.02825	2.42334	1.70444	1.63112	2.72977	2.08282	2.09896	2.30831	1.49625	1.32262	3.13452	2.25446	1.39292	2.3477	2.05038	1.519	1.59231	2.52897	1.02592	2.57749	2.15809	1.84789	1.86711	1.92664	2.25521	2.79476	1.51222	1.34157	2.71614	1.68569	1.67462	1.95875	1.64658	1.11357	3.16439	1.97385	1.78788	2.80173	2.17694
Cell_0107	AMPKARt2	EAA 1.000000e-01 X + Insulin 10000 ng/ml	0.490013	0.715942	0.68791	0.52171	0.727207	0.453831	0.634107	0.514644	0.578982	0.657185	0.577093	0.722362	0.642526	0.51877	0.508193	0.610159	0.549186	0.487607	0.707275	0.637155	0.653536	0.642167	0.60573	0.590113	0.34129	0.563076	0.582981	0.512424	0.6706	0.584458	0.642609	0.596491	0.617332	0.58733	0.471371	0.693881	0.687982	0.619722	0.741078	0.496406	0.579057	0.529321	0.574657	0.619926	0.687906	0.699086	0.712234
Cell_0108	TFEB_TR	EAA 1.000000e-01 X + Insulin 10000 ng/ml	1.04623	0.620074	0.947713	1.22654	1.23635	1.54188	1.11289	1.95891	0.797494	1.78172	1.14512	0.819703	1.46805	1.5395	1.25629	1.11316	2.03387	2.0037	1.42974	1.98009	1.03531	1.09792	1.10325	1.08775	1.24769	1.81316	1.29777	1.5125	1.10709	1.03474	0.905033	0.457432	1.25363	1.00282	1.29833	2.55641	1.09662	1.22886	1.59399	1.61917	1.8379	1.78801	1.97576	1.25974	0.658044	1.20379	1.44567
Cell_0108	FOXO_TR	EAA 1.000000e-01 X + Insulin 10000 ng/ml	1.83189	1.34052	1.51046	3.00077	2.13505	1.65989	2.01749	2.38955	2.06584	2.53648	1.70137	1.66698	2.59702	2.04811	2.17595	2.27951	1.59736	1.3169	3.17179	2.31807	1.47132	2.2835	1.93715	1.49989	1.48896	2.77466	1.04746	2.68693	2.10328	1.8385	1.90678	1.94831	2.34155	2.78758	1.4171	1.28135	2.65069	1.77139	1.70229	2.0154	1.6146	1.51889	3.17506	2.10788	2.13851	2.69037	2.12674
Cell_0108	AMPKARt2	EAA 1.000000e-01 X + Insulin 10000 ng/ml	0.484179	0.717072	0.695368	0.52316	0.712926	0.450677	0.635006	0.489537	0.592825	0.666016	0.582217	0.719817	0.648934	0.518878	0.509248	0.623899	0.54955	0.484813	0.691723	0.646163	0.653867	0.641748	0.590814	0.575045	0.3506	0.562024	0.577952	0.51749	0.66773	0.593997	0.651058	0.594663	0.623736	0.589001	0.484846	0.683442	0.687671	0.622828	0.72214	0.500519	0.563551	0.55313	0.573041	0.617319	0.686306	0.695209	0.719317
Cell_0109	TFEB_TR	EAA 1.000000e-01 X + Insulin 10000 ng/ml	0.999824	0.658787	0.954937	1.47771	1.44314	1.51917	1.15314	1.62234	0.792725	1.66204	1.20219	0.796085	1.37218	1.61807	1.25988	1.17436	2.32432	1.9986	1.36979	1.98885	1.12685	1.12013	1.21499	0.937953	1.25362	1.88219	1.27739	1.49494	1.10074	1.02375	0.932719	0.486865	1.25095	1.08565	1.52972	2.0493	1.14612	1.32058	1.3917	1.71524	1.63746	1.74862	1.94451	1.1424	0.672811	1.43662	1.34254
Cell_0109	FOXO_TR	EAA 1.000000e-01 X + Insulin 10000 ng/ml	1.718	1.38627	1.49208	2.99183	2.05665	1.66499	2.11378	2.45402	2.0953	2.62275	1.69729	1.74721	2.54551	2.04698	2.16003	2.28444	1.63478	1.36009	3.19851	2.16638	1.51287	2.2592	1.89054	1.50804	1.40883	2.7726	1.08016	2.84382	1.96726	1.86369	1.95772	1.96943	2.24198	2.75031	1.35079	1.42614	2.55463	1.89316	2.07776	2.10546	1.63945	2.09367	3.07116	2.21154	2.13343	2.67528	2.00623
Cell_0109	AMPKARt2	EAA 1.000000e-01 X + Insulin 10000 ng/ml	0.480745	0.713459	0.688236	0.525528	0.711901	0.452476	0.637103	0.479802	0.618681	0.663691	0.585828	0.709729	0.647674	0.520713	0.509125	0.627876	0.559186	0.481938	0.687473	0.640733	0.644811	0.637391	0.580716	0.566449	0.348408	0.532421	0.578447	0.515206	0.675273	0.585383	0.669896	0.601822	0.629978	0.59231	0.495949	0.681821	0.696347	0.629391	0.726885	0.503331	0.565097	0.576086	0.58707	0.611443	0.694684	0.687072	0.732178
Cell_0110	TFEB_TR	EAA 1.000000e-01 X + Insulin 10000 ng/ml	0.960305	0.660377	1.00505	1.50686	1.36072	1.49631	1.13289	1.34483	0.788222	1.65298	1.07603	0.734873	1.32833	1.68185	1.35344	1.11471	2.48302	1.98585	1.08227	1.97894	1.22412	1.12915	1.43825	1.07581	1.27116	1.8755	1.03781	1.77114	1.24699	1.01038	0.972418	0.517922	1.25873	1.23563	1.69253	1.71118	1.20364	1.20346	1.98478	1.6518	1.64092	1.77414	1.83307	1.15127	0.649218	0.652912	1.3125
Cell_0110	FOXO_TR	EAA 1.000000e-01 X + Insulin 10000 ng/ml	1.67416	1.39275	1.4985	2.95821	2.02213	1.66348	2.13989	2.5202	2.07726	2.64487	1.69594	1.75718	2.7911	2.18534	2.16319	2.21572	1.64032	1.44534	3.09012	2.02568	1.5194	2.2861	1.9595	1.54295	1.55025	2.42633	1.09248	2.90614	1.91031	1.75371	1.94143	1.95279	2.27711	2.76878	1.28929	2.00708	2.59935	1.95927	2.56741	2.17394	1.66496	2.59937	2.93678	2.16662	2.04753	1.22394	1.97745
Cell_0110	AMPKARt2	EAA 1.000000e-01 X + Insulin 10000 ng/ml	0.483263	0.71589	0.67962	0.525958	0.726182	0.456465	0.635251	0.497266	0.628462	0.65717	0.585206	0.71708	0.638846	0.528137	0.505463	0.620395	0.568216	0.479202	0.690268	0.634295	0.640255	0.639996	0.581473	0.576948	0.336128	0.5052	0.591493	0.516766	0.677648	0.57634	0.665819	0.608384	0.634853	0.591994	0.505572	0.701695	0.699744	0.639665	0.76184	0.489753	0.571131	0.563172	0.598072	0.624832	0.707886	0.543843	0.731401
Cell_0111	TFEB_TR	EAA 1.000000e-01 X + Insulin 10000 ng/ml	1.00169	0.674764	1.02941	1.43279	1.24005	1.51981	1.12009	1.65777	0.773528	1.70896	1.03273	0.718205	1.60698	1.63042	1.42138	1.0253	2.36666	1.90139	1.07944	1.92106	1.22054	1.02039	1.35503	1.12914	1.3708	1.83652	1.05174	1.85597	1.73038	1.008	0.958327	0.536025	1.20951	1.23761	1.97799	2.11627	1.16334	1.08962	2.91327	1.62233	1.81846	2.00855	0.803157	1.48081	0.616197	0.633817	1.29137
Cell_0111	FOXO_TR	EAA 1.000000e-01 X + Insulin 10000 ng/ml	1.71998	1.38263	1.5178	2.98481	2.04582	1.66893	2.14593	2.50826	2.07495	2.70858	1.75333	1.73838	2.99459	2.2504	2.08589	2.11588	1.72882	1.40597	3.00647	2.03436	1.58445	2.21291	1.94952	1.4693	1.78223	2.05943	1.0928	2.85279	1.95058	2.07031	1.89177	1.95243	2.8507	2.67699	1.29411	2.55352	2.61958	1.92086	2.76928	2.16334	1.65222	2.80371	1.58439	2.09899	2.01204	1.32579	2.03646
Cell_0111	AMPKARt2	EAA 1.000000e-01 X + Insulin 10000 ng/ml	0.480371	0.722404	0.680687	0.533793	0.736296	0.447232	0.635857	0.509927	0.623313	0.659128	0.594084	0.730746	0.648173	0.528206	0.491552	0.609139	0.556361	0.471774	0.68946	0.64288	0.647613	0.650276	0.581625	0.571354	0.344506	0.498794	0.59792	0.522789	0.674978	0.603314	0.665454	0.604054	0.631474	0.586461	0.514429	0.710325	0.6875	0.63662	0.768419	0.490465	0.571334	0.531929	0.583335	0.632743	0.705584	0.556103	0.722815
Cell_0112	TFEB_TR	EAA 1.000000e-01 X + Insulin 10000 ng/ml	1.02062	0.759014	1.01406	1.54679	1.37356	1.47311	1.1251	1.97194	0.772321	1.85206	1.24154	0.749878	1.66635	1.56484	1.34055	1.03539	2.18299	1.83512	1.24658	2.00664	1.17711	0.900827	1.22326	1.07858	1.37928	1.7896	1.23531	1.75668	1.70122	1.04975	0.925186	0.566524	1.26566	1.23787	2.27145	2.30812	1.09575	1.18749	2.27303	1.38292	1.73021	2.03538	0.821599	1.70206	0.58818	0.640163	1.24586
Cell_0112	FOXO_TR	EAA 1.000000e-01 X + Insulin 10000 ng/ml	1.71128	1.46896	1.5073	3.07137	2.04807	1.68964	2.18346	2.41956	2.20219	2.75433	1.78407	1.69427	2.893	2.13264	1.84439	2.08492	1.84933	1.44825	3.02042	2.07825	1.58431	2.13737	1.86609	1.31026	1.92487	1.84493	1.22553	2.83349	1.99319	2.9289	1.86563	1.98509	3.46699	2.57488	1.36292	2.63956	2.53029	1.85293	2.71183	1.86544	1.64139	2.66572	1.51707	2.10534	1.92375	1.33431	2.0176
Cell_0112	AMPKARt2	EAA 1.000000e-01 X + Insulin 10000 ng/ml	0.474094	0.718879	0.68153	0.542376	0.730879	0.454575	0.640285	0.514496	0.620998	0.659962	0.596468	0.720919	0.654743	0.519883	0.484419	0.612154	0.54291	0.480867	0.691578	0.661724	0.652708	0.652344	0.578894	0.561951	0.348465	0.498108	0.597954	0.530909	0.675717	0.636238	0.674983	0.589021	0.629143	0.580161	0.525558	0.70025	0.68314	0.625055	0.749212	0.664858	0.565082	0.529206	0.588557	0.61578	0.692507	0.568077	0.720067
Cell_0113	TFEB_TR	EAA 1.000000e-01 X + Insulin 10000 ng/ml	0.960587	0.742231	0.980224	1.50756	1.54824	1.47156	1.11946	1.76054	0.787701	1.8755	1.44452	0.775037	1.36781	1.57637	1.24981	1.07627	2.15213	1.84287	1.23351	2.05622	1.13903	0.926196	1.29705	1.04471	1.26451	1.72321	1.19452	1.82598	1.42327	1.10841	0.940974	0.600379	1.32086	1.30798	2.01943	2.01666	0.757599	1.40423	1.55971	1.34713	1.54345	1.6693	0.77797	1.54983	0.584862	0.651365	1.29118
Cell_0113	FOXO_TR	EAA 1.000000e-01 X + Insulin 10000 ng/ml	1.74427	1.46565	1.45473	3.03881	2.01029	1.74699	2.21508	2.33107	2.30805	2.71004	1.71569	1.6126	2.81064	2.07949	1.71015	2.07782	1.89855	1.657	3.01084	2.11111	1.51054	2.19752	1.86659	1.39759	2.11622	1.69256	1.51832	2.76061	1.99543	3.41959	1.86965	1.98485	3.54406	2.64263	1.38054	2.55752	1.26839	1.88153	2.65562	1.93067	1.65959	2.50071	1.50415	2.06482	1.86935	1.34973	1.99963
Cell_0113	AMPKARt2	EAA 1.000000e-01 X + Insulin 10000 ng/ml	0.470389	0.709583	0.675729	0.537558	0.719777	0.480846	0.638977	0.506585	0.623707	0.650639	0.574671	0.706272	0.644219	0.521856	0.497644	0.627644	0.543871	0.492461	0.69337	0.671289	0.646482	0.654773	0.580807	0.576145	0.332614	0.493612	0.610547	0.5416	0.672353	0.647288	0.667924	0.587225	0.635631	0.584679	0.527041	0.697457	0.579875	0.627463	0.745877	0.679767	0.568358	0.54342	0.58183	0.612533	0.694181	0.562843	0.713677
Cell_0114	TFEB_TR	EAA 1.000000e-01 X + Insulin 10000 ng/ml	0.975999	0.612735	0.957883	1.39652	1.68254	1.68947	1.10377	1.52354	0.806247	1.72633	1.3659	0.816828	1.14851	1.68733	1.27323	1.05211	2.14364	1.86271	1.19952	1.99316	1.1026	0.969717	1.29099	1.00777	1.29344	1.65589	1.07762	1.96962	1.67423	1.14116	0.98687	0.611255	1.22366	1.03095	1.64433	1.90964	0.699919	1.55948	1.82134	1.44726	1.62073	1.53222	0.784063	1.55912	0.627058	0.640369	1.42975
Cell_0114	FOXO_TR	EAA 1.000000e-01 X + Insulin 10000 ng/ml	1.89358	1.30935	1.40601	3.0005	2.02478	1.74699	2.23076	2.34256	2.30937	2.67624	1.64935	1.64256	2.959	2.19431	1.69647	2.07278	1.99578	1.71831	2.93554	2.18402	1.77642	2.24946	1.89333	1.75649	2.4386	1.60542	1.7053	2.51403	2.0135	3.32614	1.91496	1.95431	3.40634	1.50593	1.35011	2.62629	1.2631	1.94848	2.66235	2.03159	1.65927	2.47733	1.55291	1.98612	1.91965	1.37777	2.0844
Cell_0114	AMPKARt2	EAA 1.000000e-01 X + Insulin 10000 ng/ml	0.456901	0.714982	0.67659	0.527753	0.715861	0.469518	0.635024	0.494077	0.622785	0.645295	0.559162	0.711587	0.643281	0.535386	0.507718	0.624905	0.539656	0.474017	0.6828	0.669085	0.647958	0.665091	0.5834	0.586051	0.335118	0.491412	0.615378	0.53574	0.672901	0.65185	0.661317	0.598784	0.63992	0.497115	0.520271	0.700542	0.597944	0.63387	0.745232	0.680726	0.577886	0.541608	0.573334	0.63929	0.701662	0.555732	0.706309
Cell_0115	TFEB_TR	EAA 1.000000e-01 X + Insulin 10000 ng/ml	1.0674	0.565925	0.928407	1.44729	1.99936	1.88656	1.09689	1.52875	0.840816	1.8157	1.18311	0.828088	1.30839	1.96452	1.33635	0.991514	2.03297	1.9431	1.29649	2.09271	1.09847	0.881115	1.18547	1.04048	1.41884	1.63031	1.12769	1.85887	1.80943	1.13925	1.48204	0.623877	1.18665	1.04922	1.7388	1.89537	0.672861	1.49019	1.29297	1.56246	1.7421	1.53854	0.817778	1.60934	0.665013	0.620815	1.47374
Cell_0115	FOXO_TR	EAA 1.000000e-01 X + Insulin 10000 ng/ml	1.94631	1.27473	1.39392	3.10688	2.12243	1.66847	2.2131	2.41711	2.38376	2.70472	1.61293	1.69792	3.01253	2.28445	1.59544	2.11537	2.19515	1.87999	2.87508	2.22417	2.44546	2.22905	1.87232	1.97966	2.61102	1.6347	1.66396	2.37699	2.03933	3.2629	2.99935	1.93589	3.46554	1.52511	1.367	2.67302	1.22536	1.91756	2.63566	2.09075	1.59812	2.43151	1.57024	2.00562	1.93442	1.34832	2.1106
Cell_0115	AMPKARt2	EAA 1.000000e-01 X + Insulin 10000 ng/ml	0.443967	0.720197	0.685573	0.522814	0.717619	0.435636	0.635558	0.504917	0.620618	0.646881	0.568048	0.723079	0.655603	0.535506	0.50519	0.609047	0.53318	0.450078	0.672203	0.661444	0.660928	0.667556	0.581679	0.568356	0.335973	0.497884	0.59644	0.512635	0.686414	0.641705	0.582785	0.598495	0.639885	0.532014	0.526007	0.698835	0.594384	0.625007	0.735028	0.673852	0.565059	0.532284	0.575056	0.653198	0.690217	0.56584	0.715693
Cell_0116	TFEB_TR	EAA 1.000000e-01 X + Insulin 10000 ng/ml	1.11791	0.667076	0.89392	1.29191	2.02937	1.76841	1.09537	1.66191	0.88052	2.07246	1.22367	0.756274	1.82897	2.20199	1.35694	0.988075	1.9091	2.07505	1.33625	2.23311	1.13612	0.833035	1.29319	0.993439	1.39476	1.62595	1.15537	1.07348	1.5	1.09757	1.60864	0.644912	1.27869	1.09829	1.72694	1.67466	0.716273	1.26705	0.816123	1.54571	1.71966	1.30099	0.757364	1.402	0.657501	0.62417	1.41018
Cell_0116	FOXO_TR	EAA 1.000000e-01 X + Insulin 10000 ng/ml	1.87678	1.40557	1.39984	3.13633	2.21277	1.68847	2.17399	2.40643	2.42419	2.69518	1.53849	1.54116	2.89913	2.24059	1.65606	2.12342	2.30329	2.51332	2.87068	2.15233	2.91485	2.22303	1.85072	2.01154	2.49173	1.68716	1.58225	1.07102	1.99898	3.3022	2.98012	1.9311	3.55554	1.50822	1.41141	2.57609	1.22285	1.82721	2.55882	2.07565	1.54082	2.38497	1.49845	2.05672	1.89585	1.32983	2.02848
Cell_0116	AMPKARt2	EAA 1.000000e-01 X + Insulin 10000 ng/ml	0.446814	0.703486	0.686502	0.514028	0.717638	0.445487	0.637637	0.526477	0.620437	0.646485	0.574084	0.725393	0.665109	0.517733	0.519925	0.613823	0.542548	0.452894	0.677431	0.652084	0.659617	0.656568	0.579581	0.558752	0.312984	0.507052	0.589915	0.653154	0.687841	0.618339	0.566595	0.594725	0.637735	0.538435	0.531516	0.694232	0.598037	0.61858	0.737553	0.681886	0.544978	0.529292	0.581923	0.642306	0.681211	0.571186	0.725062
Cell_0117	TFEB_TR	EAA 1.000000e-01 X + Insulin 10000 ng/ml	1.15456	0.795883	0.93016	1.01362	1.79449	1.61088	1.07008	1.90165	0.878198	2.01639	1.40248	0.722824	2.11436	2.1044	1.35358	0.99966	1.72488	2.10032	1.33562	1.96473	1.19909	0.970359	1.41181	0.872747	1.05175	1.58318	1.11793	1.10673	1.60677	1.03558	1.95011	0.643874	1.24249	1.25515	1.55583	1.63818	0.788255	1.24042	1.68043	1.47337	1.73201	1.2882	0.703896	1.50277	0.649638	0.648876	1.35437
Cell_0117	FOXO_TR	EAA 1.000000e-01 X + Insulin 10000 ng/ml	1.88635	1.50788	1.48959	3.05584	2.21322	1.77327	2.17027	2.29693	2.25231	2.67348	1.4933	1.47251	2.9209	2.15858	2.01087	2.05158	2.38092	3.07024	2.84543	2.03552	2.93133	2.19341	1.77211	2.06259	2.01834	1.70268	1.55836	1.07159	1.94684	3.24387	2.93465	1.93204	3.58187	1.52114	1.43116	2.50762	1.25427	1.79815	2.50389	2.05552	1.54738	2.43554	1.42704	2.03756	1.91244	1.36049	1.99033
Cell_0117	AMPKARt2	EAA 1.000000e-01 X + Insulin 10000 ng/ml	0.44495	0.690031	0.68108	0.506438	0.71268	0.464305	0.638604	0.530854	0.621232	0.649248	0.569298	0.719098	0.668821	0.510353	0.550574	0.628821	0.548419	0.466928	0.682648	0.653838	0.652417	0.647005	0.57795	0.574562	0.56095	0.509854	0.606226	0.662665	0.672997	0.615773	0.582774	0.603801	0.633122	0.541398	0.523273	0.700818	0.609376	0.624584	0.744483	0.696941	0.547244	0.52826	0.581762	0.638531	0.698632	0.564864	0.724122
Cell_0118	TFEB_TR	EAA 1.000000e-01 X + Insulin 10000 ng/ml	1.18319	0.802619	0.997048	1.15573	2.11847	1.6786	1.02962	1.87097	0.856296	1.90471	1.46458	0.790344	1.76849	1.87324	1.38295	0.959178	1.44765	2.07739	1.4576	1.65973	1.30372	1.23447	1.20269	1.05024	1.25104	1.51718	1.1529	1.11167	2.08627	0.994643	1.89796	0.644899	1.13448	1.31131	1.97728	1.90214	0.788952	1.34074	1.91989	1.44113	1.72724	1.49823	0.761809	1.69582	0.665408	0.672721	1.29453
Cell_0118	FOXO_TR	EAA 1.000000e-01 X + Insulin 10000 ng/ml	1.93704	1.58919	1.6416	3.06644	2.16903	1.74087	2.18061	2.20265	2.18913	2.77119	1.51153	1.79406	2.96917	2.14536	2.23878	2.01211	2.55358	3.1314	2.75271	1.94451	2.86579	1.57543	1.6158	2.03696	2.03308	1.7424	1.56022	1.06643	1.93794	3.17807	2.92085	1.95876	3.67073	1.54398	1.47897	2.48522	1.25047	1.84156	2.50562	2.03215	1.57229	2.41682	1.47241	2.04845	1.95687	1.38041	2.00022
Cell_0118	AMPKARt2	EAA 1.000000e-01 X + Insulin 10000 ng/ml	0.434748	0.695653	0.678691	0.512646	0.709336	0.444515	0.639165	0.525227	0.628445	0.655417	0.566952	0.708837	0.664624	0.521007	0.554168	0.629896	0.541322	0.466451	0.680498	0.671627	0.661675	0.563309	0.577392	0.576004	0.556366	0.508677	0.608342	0.664975	0.67203	0.628377	0.595593	0.609408	0.642632	0.553165	0.520877	0.719713	0.604257	0.623716	0.741375	0.693652	0.554843	0.528407	0.576273	0.640784	0.709236	0.56685	0.728746
Cell_0119	TFEB_TR	EAA 1.000000e-01 X + Insulin 10000 ng/ml	1.16789	0.797408	0.994494	1.45201	2.29464	1.70576	1.01224	1.5543	0.876679	2.0393	1.41794	0.818585	1.56669	1.81415	1.43782	0.963005	1.3101	2.10119	1.89002	2.01866	1.36505	1.11108	1.01907	1.23229	1.30334	1.47438	1.10939	1.10421	2.05252	0.975683	1.34308	0.67327	1.16407	1.19612	2.56765	1.96487	0.731567	1.24021	1.22782	1.46919	1.60679	1.43494	0.80752	1.41609	0.674317	0.693059	1.32345
Cell_0119	FOXO_TR	EAA 1.000000e-01 X + Insulin 10000 ng/ml	1.92947	1.71524	1.71326	3.06972	2.18232	1.78644	2.16603	2.15586	2.41283	2.88441	1.48537	2.11462	2.85528	2.19065	2.20621	1.99205	2.49552	3.07463	2.08358	1.908	2.8856	1.68595	1.52445	1.91371	2.12376	1.80796	1.60338	1.07507	1.90979	3.11698	2.90829	2.03544	3.67003	1.48289	1.59153	2.41164	1.21744	1.85835	2.54258	1.99919	1.59276	2.29722	1.57346	2.13759	1.97616	1.37997	1.98356
Cell_0119	AMPKARt2	EAA 1.000000e-01 X + Insulin 10000 ng/ml	0.431808	0.692527	0.677854	0.516196	0.716014	0.458389	0.642652	0.521189	0.635069	0.655503	0.566663	0.702067	0.65868	0.530027	0.525226	0.631642	0.547633	0.447635	0.601579	0.68539	0.665288	0.560774	0.582752	0.566474	0.560954	0.503369	0.596857	0.667411	0.682475	0.633557	0.590274	0.60692	0.662404	0.551029	0.517943	0.719193	0.596188	0.620871	0.745989	0.68399	0.558857	0.532583	0.57775	0.636739	0.689528	0.569254	0.724545
Cell_0120	TFEB_TR	EAA 1.000000e-01 X + Insulin 10000 ng/ml	1.14775	0.943208	0.930191	1.44675	1.85643	1.68315	1.02026	1.49098	0.92429	2.00142	1.3677	0.770964	1.92138	1.87948	1.46263	0.644414	1.37966	2.02516	1.70578	2.40541	1.34036	1.15294	1.20245	1.01045	1.2888	1.44681	0.96195	1.09751	1.61468	0.955537	1.13662	0.690001	1.19236	1.15336	2.41729	1.66555	0.73605	1.19309	1.19649	1.58774	1.58383	1.41294	0.783817	1.30072	0.669363	0.693872	1.49123
Cell_0120	FOXO_TR	EAA 1.000000e-01 X + Insulin 10000 ng/ml	1.91887	1.81531	1.85677	2.97108	2.22534	2.13348	2.14503	2.1142	2.61345	2.87262	1.42263	2.14703	2.8836	2.26621	2.18316	1.36621	2.19967	3.07206	2.01527	1.93078	2.86988	1.70368	1.51223	1.89201	2.16841	1.87821	1.64544	1.08187	1.89611	3.007	2.93829	2.11921	3.50361	1.39791	1.6769	2.3982	1.17334	1.79652	2.56984	2.02824	1.6105	2.2953	1.55897	2.21357	2.0079	1.38055	1.97957
Cell_0120	AMPKARt2	EAA 1.000000e-01 X + Insulin 10000 ng/ml	0.427217	0.67803	0.684392	0.509143	0.724102	0.53233	0.644897	0.518008	0.630547	0.649997	0.569333	0.707712	0.660874	0.532292	0.504622	0.55007	0.562704	0.430474	0.629906	0.681447	0.651598	0.570721	0.59256	0.579823	0.557871	0.496646	0.596282	0.676794	0.683414	0.635379	0.602264	0.608046	0.658756	0.548923	0.49921	0.709083	0.601259	0.627863	0.751311	0.68638	0.564976	0.539246	0.584507	0.64201	0.672812	0.558663	0.710172
Cell_0121	TFEB_TR	EAA 1.000000e-01 X + Insulin 10000 ng/ml	1.14281	0.969783	0.842836	1.53519	2.07466	1.84461	1.02689	1.54613	0.968035	1.81486	1.36482	0.770656	1.3671	1.96938	1.47159	0.794883	1.44007	1.89163	1.5379	2.09903	1.4316	1.28585	1.3795	0.972765	1.22336	1.42936	0.936574	1.09927	1.48025	0.935156	1.45063	0.689525	1.19904	1.12683	1.73581	1.39919	0.81013	1.34412	1.32136	1.7029	1.71343	1.56413	0.788301	1.43585	0.654018	0.655836	1.50352
Cell_0121	FOXO_TR	EAA 1.000000e-01 X + Insulin 10000 ng/ml	1.88891	1.84693	2.19015	2.91174	2.19135	2.47112	2.10597	2.1236	2.72485	2.85718	1.40888	2.11074	1.82032	2.36931	2.21135	1.4139	2.17171	3.01613	2.16144	1.9294	2.82103	1.70224	1.47859	1.95451	2.13307	1.97385	1.6263	1.06487	1.95195	2.92875	3.07541	2.15501	3.43229	1.4007	1.66915	2.48248	1.12154	1.72745	2.5641	2.06304	1.60095	2.38522	1.52755	2.27912	2.0578	1.39587	2.00634
Cell_0121	AMPKARt2	EAA 1.000000e-01 X + Insulin 10000 ng/ml	0.420156	0.683338	0.698351	0.512792	0.724835	0.562372	0.638679	0.519225	0.626272	0.646359	0.574378	0.722073	0.663352	0.529475	0.507911	0.556736	0.562223	0.429895	0.62837	0.674399	0.643134	0.580874	0.593307	0.575934	0.55289	0.502836	0.590167	0.686962	0.677889	0.631379	0.618256	0.606108	0.637818	0.569053	0.494071	0.728473	0.608216	0.629444	0.740655	0.689424	0.55602	0.540297	0.587402	0.650445	0.678825	0.553915	0.718678
Cell_0122	TFEB_TR	EAA 1.000000e-01 X + Insulin 10000 ng/ml	1.15786	0.73571	0.866531	1.87689	2.50499	1.93313	1.01092	1.4785	0.995006	1.55726	1.37814	0.802528	1.04011	2.03766	1.48774	0.779037	1.447	1.88721	1.56854	2.01438	1.57708	1.33858	1.275	1.25586	1.2052	1.44098	0.926495	1.1361	1.69348	0.925497	1.64248	0.698255	1.32673	1.02247	1.38756	1.38032	0.829135	1.29248	1.28075	1.67605	1.80843	1.47574	0.832312	1.26902	0.641188	0.639618	1.3109
Cell_0122	FOXO_TR	EAA 1.000000e-01 X + Insulin 10000 ng/ml	1.84479	1.81711	2.41502	2.8929	2.09736	2.45171	2.06643	2.2175	2.85472	2.02415	1.43498	2.11335	1.82637	2.39158	2.19809	1.46809	2.29692	3.00485	2.3378	1.86945	2.76154	1.75815	1.4546	2.00069	2.09209	2.00907	1.60391	1.05781	1.9833	2.92415	3.11103	2.15889	3.44512	1.43611	1.66028	2.48621	1.11132	1.6967	2.54434	2.00809	1.61276	2.36383	1.66858	2.33448	2.08945	1.42878	2.01081
Cell_0122	AMPKARt2	EAA 1.000000e-01 X + Insulin 10000 ng/ml	0.419817	0.705844	0.701632	0.521257	0.725088	0.525455	0.642613	0.528965	0.625732	0.360293	0.574249	0.724003	0.67254	0.522652	0.508541	0.545642	0.554765	0.4381	0.631595	0.677022	0.644693	0.579705	0.574639	0.534823	0.567609	0.513432	0.574939	0.686149	0.677386	0.624285	0.602674	0.604871	0.632149	0.573685	0.516083	0.741431	0.60811	0.628955	0.735244	0.684985	0.543183	0.526386	0.585569	0.64438	0.686046	0.564046	0.734338
Cell_0123	TFEB_TR	EAA 1.000000e-01 X + Insulin 10000 ng/ml	1.20461	0.618221	1.15377	1.80482	2.12349	1.82727	0.896784	1.56662	0.965762	1.48311	1.32543	0.784454	1.07992	1.97886	1.46013	0.734865	1.49472	1.89016	1.61679	2.47798	1.47721	1.19617	1.19328	1.09755	1.29547	1.47133	0.822187	1.18595	1.85107	0.925621	1.64837	0.699046	1.3352	1.01567	1.79435	1.38539	0.771162	1.14265	1.64492	1.54466	1.81075	1.476	0.882697	1.36968	0.673098	0.687833	1.27101
Cell_0123	FOXO_TR	EAA 1.000000e-01 X + Insulin 10000 ng/ml	1.91167	1.75628	2.49727	2.84422	2.0379	2.2597	2.55069	2.24411	2.86663	1.97435	1.47226	2.11301	1.77043	2.28117	2.17326	1.57636	2.2074	3.04224	2.35102	1.84745	2.67853	1.7926	1.45718	2.02226	1.97808	1.91376	1.61865	1.07982	1.98205	2.94621	2.97157	2.12985	3.39717	1.41559	1.70279	2.38991	1.15241	1.65226	2.52609	1.98228	1.63748	2.28382	1.7557	2.31538	2.12551	1.44923	1.99906
Cell_0123	AMPKARt2	EAA 1.000000e-01 X + Insulin 10000 ng/ml	0.42214	0.717758	0.691754	0.517047	0.725551	0.50418	0.623724	0.536415	0.622872	0.354428	0.571118	0.713934	0.67303	0.530962	0.503287	0.552619	0.548166	0.451972	0.644932	0.680974	0.652597	0.578955	0.561652	0.52399	0.585308	0.511267	0.58662	0.67515	0.690551	0.631998	0.587092	0.615276	0.637249	0.54852	0.53146	0.720401	0.608091	0.637844	0.739046	0.682211	0.554448	0.503314	0.575702	0.639235	0.683693	0.566054	0.725142
Cell_0124	TFEB_TR	EAA 1.000000e-01 X + Insulin 10000 ng/ml	1.25652	0.720648	1.50037	0.609617	2.12006	1.91271	1.20138	1.67763	0.919839	1.46465	1.31568	0.761952	1.16527	1.77732	1.40119	0.768123	1.51945	1.79569	1.64601	2.39049	1.33307	1.11254	1.27501	0.808968	1.22876	1.49243	0.90018	1.19766	1.63106	0.927405	1.79722	0.694755	1.10124	1.04081	2.24335	1.28397	0.754845	1.29676	1.75863	1.4817	1.82357	1.81594	0.946888	1.8689	0.73385	0.724256	1.37168
Cell_0124	FOXO_TR	EAA 1.000000e-01 X + Insulin 10000 ng/ml	2.07019	1.73197	2.65328	1.87237	2.02574	2.24425	2.56069	2.17452	2.78182	1.9184	1.48023	2.12712	1.7314	2.21017	2.19471	1.62336	2.20734	3.02129	2.30872	1.90229	2.63194	1.76121	1.40789	2.00914	1.80648	1.79615	1.62734	1.09554	2.0302	2.98216	2.90064	2.09261	3.43597	1.36502	1.70838	2.32923	1.20549	1.57239	2.54688	2.06806	1.61409	2.27234	1.61583	2.31135	2.20865	1.44847	2.01619
Cell_0124	AMPKARt2	EAA 1.000000e-01 X + Insulin 10000 ng/ml	0.437614	0.714883	0.68874	0.441171	0.719338	0.505968	0.617099	0.527387	0.622031	0.371528	0.57132	0.720371	0.688739	0.552999	0.519886	0.565769	0.540366	0.461741	0.640278	0.677932	0.660713	0.588417	0.585454	0.551225	0.577894	0.507896	0.617934	0.67097	0.704644	0.645585	0.601012	0.615839	0.637964	0.545102	0.527486	0.714999	0.609958	0.636489	0.734034	0.682798	0.566185	0.495394	0.558644	0.639501	0.684586	0.558039	0.714065
Cell_0125	TFEB_TR	EAA 1.000000e-01 X + Insulin 10000 ng/ml	1.87941	0.855422	1.53722	0.605988	2.63795	2.18223	1.02879	1.59393	0.947549	1.456	1.41547	0.75255	1.15618	1.64962	1.39609	0.760457	1.47805	1.73518	1.81348	1.96661	1.38537	1.32307	1.28126	1.14109	1.10114	1.49275	1.06964	1.19888	1.21076	0.923733	2.00237	0.706658	0.978613	1.01918	2.09914	1.18145	0.831717	1.51743	1.88391	1.66618	1.9268	1.78548	0.982326	1.84758	0.759953	0.729195	1.31722
Cell_0125	FOXO_TR	EAA 1.000000e-01 X + Insulin 10000 ng/ml	2.86436	1.70938	2.68735	1.89564	2.01765	2.38995	2.62123	2.2214	2.77934	1.88908	1.45324	2.11523	1.81466	2.22534	2.27386	1.56402	2.43433	2.98743	2.29817	1.96314	2.61438	1.74271	1.34894	2.0207	1.77131	1.70533	1.60577	1.08858	2.06521	3.04016	2.92707	2.13709	3.52902	1.31884	1.67483	2.32261	1.27043	1.55592	2.61103	2.16159	1.65547	2.25918	1.52667	2.31861	2.29062	1.4356	2.04759
Cell_0125	AMPKARt2	EAA 1.000000e-01 X + Insulin 10000 ng/ml	0.645371	0.701753	0.698355	0.46	0.707609	0.493019	0.630142	0.517014	0.616739	0.390271	0.579361	0.735814	0.69761	0.553774	0.542731	0.55211	0.543028	0.454876	0.633891	0.674137	0.650222	0.593359	0.611274	0.559872	0.562301	0.510409	0.628029	0.675801	0.696973	0.644328	0.613234	0.600367	0.639148	0.566412	0.521901	0.73057	0.600418	0.629651	0.73352	0.677631	0.556025	0.519584	0.54935	0.635171	0.689829	0.562053	0.718462
Cell_0126	TFEB_TR	EAA 1.000000e-01 X + Insulin 10000 ng/ml	2.12522	1.04421	1.32664	0.600154	2.50633	2.20119	0.984626	1.56734	0.991425	1.44133	1.41601	0.740296	1.19813	1.7728	1.41372	0.730734	1.46945	1.7208	1.81855	2.20983	1.36971	1.37262	1.20771	1.42722	1.2625	1.48571	0.972153	1.21966	1.15258	0.914439	1.9511	0.694451	1.05239	1.10553	2.19923	1.13194	0.916872	1.47538	2.57854	1.95472	1.96297	1.32102	1.00401	1.455	0.751388	0.769326	1.20416
Cell_0126	FOXO_TR	EAA 1.000000e-01 X + Insulin 10000 ng/ml	2.82543	1.63315	2.52952	1.94653	2.01508	2.42377	2.64256	2.34204	2.78797	1.89007	1.48793	2.06665	1.9199	2.18005	2.33263	1.55334	2.52367	2.9556	2.26039	1.96339	2.57307	1.74441	1.35706	2.0713	1.82799	1.61217	1.55608	1.07714	2.05182	3.08379	2.95991	2.17771	3.48287	1.28495	1.67272	2.31942	1.30806	1.65172	2.5935	2.22215	1.67654	2.22729	1.57368	2.20398	2.30342	1.40372	2.09084
Cell_0126	AMPKARt2	EAA 1.000000e-01 X + Insulin 10000 ng/ml	0.636816	0.683782	0.699466	0.47016	0.700578	0.479647	0.631483	0.522057	0.60967	0.393624	0.590017	0.731435	0.679108	0.540457	0.541376	0.558116	0.552243	0.453466	0.644171	0.676827	0.636725	0.58059	0.600248	0.5592	0.570167	0.513172	0.618919	0.66899	0.687294	0.636909	0.601743	0.599756	0.641235	0.569465	0.518239	0.735281	0.585726	0.643325	0.745969	0.671652	0.545298	0.547775	0.549636	0.643159	0.685937	0.563654	0.717598
Cell_0127	TFEB_TR	EAA 1.000000e-01 X + Insulin 10000 ng/ml	3.04379	1.18484	1.2314	0.600278	2.28155	1.93514	1.18343	1.61376	0.969389	1.46198	1.3571	0.772347	1.12152	1.9457	1.36177	0.823103	1.51001	1.705	1.586	2.65615	1.25726	1.2071	1.22739	1.12358	1.39398	1.49408	0.8469	1.22283	1.23269	0.905486	1.61992	0.644481	1.09627	1.2441	2.75696	1.18987	0.962953	1.34636	2.32486	1.97642	1.84858	1.23826	1.0872	1.3611	0.732545	0.823828	1.24298
Cell_0127	FOXO_TR	EAA 1.000000e-01 X + Insulin 10000 ng/ml	2.91028	1.58506	2.51763	1.96945	2.04303	2.25672	2.57127	2.30788	2.6954	1.89538	1.55814	2.05124	1.91479	2.12026	2.31634	1.56651	2.48433	2.88011	2.25076	1.93606	2.55991	1.72345	1.37855	2.07202	1.79363	1.58007	1.53228	1.07263	2.0811	3.09725	3.02738	2.11834	3.38055	1.29097	1.66844	2.31204	1.25501	1.67142	2.4896	2.25758	1.51577	2.26748	1.56558	2.27462	2.27152	1.37571	2.22776
Cell_0127	AMPKARt2	EAA 1.000000e-01 X + Insulin 10000 ng/ml	0.647573	0.677789	0.688744	0.466578	0.709357	0.478733	0.619743	0.52233	0.619369	0.397346	0.587609	0.723648	0.677642	0.549227	0.542482	0.589544	0.554332	0.454641	0.652665	0.678746	0.649563	0.565775	0.590135	0.574113	0.585202	0.514955	0.613939	0.650387	0.692595	0.638704	0.587046	0.613154	0.639281	0.563055	0.518547	0.740278	0.587981	0.651825	0.748216	0.675513	0.549323	0.539876	0.542757	0.662441	0.684368	0.547302	0.710735
Cell_0128	TFEB_TR	EAA 1.000000e-01 X + Insulin 10000 ng/ml	3.09026	1.14271	1.25622	0.618286	2.38467	1.77589	1.05985	1.53669	0.949797	1.48806	1.41613	0.802473	0.969242	1.9102	1.28455	0.920988	1.51254	1.72968	1.52262	2.6808	1.288	1.46791	1.23919	0.957155	1.2603	1.51146	0.914529	1.21555	1.21168	0.895992	1.65959	0.630064	1.11362	1.32772	2.52215	1.27514	1.06232	1.34282	1.58025	1.90313	1.92856	1.42122	1.14725	1.4097	0.71427	0.855961	1.32064
Cell_0128	FOXO_TR	EAA 1.000000e-01 X + Insulin 10000 ng/ml	2.96636	1.58908	2.5681	1.95353	2.06161	2.06113	2.51508	2.19027	2.58297	1.9092	1.52738	2.07076	1.88438	2.15532	2.33916	1.48451	2.54421	2.83708	2.36092	1.97428	2.58171	1.70931	1.38576	2.03647	1.76099	1.59609	1.59975	1.07258	2.15633	3.10334	2.99904	2.13846	3.28725	1.32523	1.68588	2.29252	1.19044	1.61716	2.47659	2.25433	1.71143	2.31553	1.51874	2.74202	2.22641	1.35744	2.50841
Cell_0128	AMPKARt2	EAA 1.000000e-01 X + Insulin 10000 ng/ml	0.657813	0.683553	0.694334	0.458684	0.723903	0.483338	0.6301	0.515078	0.633458	0.407218	0.581226	0.728237	0.690226	0.560565	0.558663	0.573777	0.554617	0.431047	0.651159	0.674322	0.662874	0.56872	0.599015	0.575841	0.575313	0.505705	0.618163	0.644713	0.687773	0.640886	0.592644	0.614796	0.640028	0.565468	0.533166	0.738237	0.595944	0.636168	0.734264	0.675914	0.575032	0.516036	0.53356	0.66338	0.702215	0.547851	0.716698
Cell_0129	TFEB_TR	EAA 1.000000e-01 X + Insulin 10000 ng/ml	2.63623	1.08604	1.15369	0.638688	2.2433	1.83341	0.914443	1.43312	0.96961	1.46466	1.3838	0.775935	1.10387	1.74001	1.26703	0.839928	1.4792	1.73309	1.66449	2.55145	1.33346	1.73258	1.14428	1.10138	1.30162	1.51312	0.890127	1.23239	1.89093	0.879587	2.35703	0.67051	1.1292	1.30051	1.75157	1.21605	1.21902	1.3486	2.45281	2.11828	2.31706	1.22192	1.12424	1.53609	0.720687	0.884311	1.32612
Cell_0129	FOXO_TR	EAA 1.000000e-01 X + Insulin 10000 ng/ml	3.07111	1.57829	2.36718	1.95622	2.00649	1.98626	2.53718	2.14311	2.58939	1.91712	1.46081	2.09652	1.89349	2.17556	2.44659	1.38352	2.62114	2.85371	2.48146	2.01586	2.5576	1.71864	1.38444	2.00955	1.83091	1.60549	1.64492	1.06832	2.20887	3.07014	2.83218	2.23149	3.18469	1.32896	1.85618	2.23359	1.21278	1.88549	2.55383	2.2584	2.5373	2.29965	1.49528	3.04951	2.18711	1.32164	2.8137
Cell_0129	AMPKARt2	EAA 1.000000e-01 X + Insulin 10000 ng/ml	0.658764	0.690172	0.707937	0.457856	0.721495	0.497323	0.647814	0.525225	0.638656	0.410128	0.589213	0.726124	0.670517	0.545513	0.556996	0.541565	0.555776	0.423591	0.653508	0.671301	0.650646	0.584172	0.594787	0.555672	0.556487	0.495342	0.621883	0.653575	0.680108	0.633143	0.60872	0.606897	0.648992	0.560675	0.547604	0.714466	0.590426	0.639488	0.727934	0.670225	0.613387	0.510582	0.541732	0.652746	0.710452	0.567593	0.726793
Cell_0130	TFEB_TR	EAA 1.000000e-01 X + Insulin 10000 ng/ml	2.97625	1.09447	1.03422	0.639303	2.53411	1.78256	1.20238	1.47541	0.963469	1.43653	1.2549	0.784299	1.3199	1.62761	1.28748	0.692194	1.51968	1.65316	1.69633	2.4967	1.29386	1.37049	1.11323	0.988105	1.60441	1.50781	0.775167	1.2761	2.71589	0.85947	2.53054	0.696907	1.09478	1.09469	1.88675	1.20458	1.2677	1.28188	3.16738	2.30619	2.60197	1.13525	1.14776	1.7596	0.737607	0.89276	1.31229
Cell_0130	FOXO_TR	EAA 1.000000e-01 X + Insulin 10000 ng/ml	3.26599	1.56722	2.15235	1.96581	1.91366	2.0534	2.57925	2.14945	2.70734	1.88505	1.47144	2.14359	1.87646	2.12044	2.48822	1.3232	2.60198	2.82246	2.49529	1.92801	2.51645	1.73231	1.36862	1.99927	1.86277	1.66389	1.56367	1.0628	2.18175	2.97751	2.76073	2.21399	3.15584	1.28314	2.1438	2.17737	1.26276	2.42216	2.65095	2.244	3.12647	2.32076	1.44078	2.98056	2.22924	1.30872	2.92858
Cell_0130	AMPKARt2	EAA 1.000000e-01 X + Insulin 10000 ng/ml	0.654232	0.696605	0.698987	0.456543	0.708631	0.50425	0.639383	0.53619	0.643985	0.40679	0.593666	0.718588	0.653809	0.527661	0.548	0.556073	0.557228	0.451102	0.663597	0.665898	0.638027	0.594455	0.590102	0.54294	0.55664	0.502285	0.615943	0.657623	0.688891	0.624958	0.606521	0.600855	0.656256	0.554021	0.544169	0.704901	0.583738	0.670958	0.738674	0.679659	0.611287	0.517348	0.551554	0.652984	0.690748	0.563528	0.721405
Cell_0131	TFEB_TR	EAA 1.000000e-01 X + Insulin 10000 ng/ml	3.06621	1.11834	1.10238	0.625412	3.40393	1.68907	1.41782	1.61774	0.936903	1.4608	1.3536	0.839835	1.2104	1.66386	1.31558	0.65447	1.6526	1.61949	1.64693	2.68446	1.34997	1.2538	1.2555	0.819594	1.83256	1.52664	0.788446	1.37767	2.22031	0.840861	1.76861	0.695621	1.12173	0.9766	2.53787	1.33522	1.20599	1.30377	2.09135	2.1407	2.60957	1.65814	1.20798	1.64424	0.830564	0.881715	1.2766
Cell_0131	FOXO_TR	EAA 1.000000e-01 X + Insulin 10000 ng/ml	3.33761	1.59006	2.21014	1.92101	1.87107	2.21693	2.65464	2.1887	2.75067	1.84089	1.49089	2.22184	1.87593	2.10022	2.44653	1.29444	2.5185	2.77718	2.49171	1.83165	2.55377	1.7336	1.41846	2.03566	1.81702	1.70184	1.53098	1.06965	2.09123	2.93207	2.76843	2.3723	3.14215	1.22997	2.374	2.20094	1.28529	2.66649	2.76962	2.14931	3.1349	2.38823	1.36595	3.00868	1.10894	1.33225	2.86343
Cell_0131	AMPKARt2	EAA 1.000000e-01 X + Insulin 10000 ng/ml	0.643352	0.690692	0.693475	0.457339	0.706987	0.488701	0.626479	0.525951	0.639305	0.407769	0.581985	0.714033	0.67392	0.5265	0.559997	0.557526	0.557937	0.45149	0.663345	0.656233	0.638116	0.590907	0.597889	0.545187	0.564556	0.497916	0.613857	0.657844	0.688594	0.623694	0.588032	0.60248	0.653579	0.560569	0.542723	0.71465	0.587312	0.681771	0.742565	0.687758	0.559557	0.53817	0.541194	0.654028	0.528245	0.553758	0.704721
Cell_0132	TFEB_TR	EAA 1.000000e-01 X + Insulin 10000 ng/ml	2.49129	1.13509	1.18759	0.607863	3.16413	1.96635	1.28579	1.68586	0.946759	1.47859	1.51813	0.868753	1.04073	1.77544	1.30557	0.707914	1.7674	1.71241	2.04014	2.93245	1.45441	1.73678	1.40828	0.987543	1.85135	1.57273	0.871182	1.48682	1.52166	0.824935	1.47782	0.714959	1.1993	1.06242	2.4686	1.36699	1.16915	1.37149	1.51502	1.95507	2.57934	0.710929	1.16115	1.38339	0.786029	0.893732	1.26151
Cell_0132	FOXO_TR	EAA 1.000000e-01 X + Insulin 10000 ng/ml	3.37514	1.64457	2.35427	1.85632	1.86642	2.36997	2.801	2.24382	2.70057	1.80819	1.50255	2.31391	1.94588	2.1115	2.43981	1.33487	2.41469	2.83393	2.5603	1.88801	2.63501	1.69647	1.4686	2.03646	1.8038	1.68639	1.6246	1.07594	2.1582	3.03638	2.68111	2.89859	3.08485	1.21613	2.46954	2.24351	1.30376	2.57727	2.69014	2.09482	3.19603	0.984578	1.34552	3.10527	1.11959	1.32421	2.85507
Cell_0132	AMPKARt2	EAA 1.000000e-01 X + Insulin 10000 ng/ml	0.645214	0.676161	0.710924	0.473434	0.712167	0.482107	0.639971	0.522026	0.628122	0.410972	0.577509	0.703067	0.6771	0.533958	0.572848	0.526379	0.549604	0.433694	0.647109	0.660184	0.637503	0.585588	0.593179	0.549383	0.563956	0.482684	0.623419	0.663656	0.684515	0.628987	0.576159	0.616304	0.649416	0.562594	0.558504	0.711148	0.594813	0.664495	0.732279	0.671428	0.53549	0.446437	0.533155	0.644882	0.530656	0.569714	0.693362
Cell_0133	TFEB_TR	EAA 1.000000e-01 X + Insulin 10000 ng/ml	2.36018	1.05153	1.14957	0.601375	2.07492	2.27776	1.24664	1.64938	0.976715	1.43688	1.47075	0.882853	1.08927	1.81578	1.1821	0.771771	1.87114	1.78647	2.65219	2.55108	1.45494	1.80789	1.34596	1.13204	1.75649	1.62407	0.969544	1.47131	1.98652	0.818161	1.83457	0.75462	1.17347	1.0932	1.95475	1.43963	1.15658	1.31021	0.983326	1.97778	2.60678	0.737003	1.06995	1.55338	0.790495	0.934527	1.32667
Cell_0133	FOXO_TR	EAA 1.000000e-01 X + Insulin 10000 ng/ml	3.49731	1.69035	2.43688	1.86275	1.83578	2.46518	2.93074	2.26694	2.72546	1.77036	1.57144	2.39679	2.01545	2.08993	2.44077	1.38036	2.32223	2.90381	2.62282	1.93541	2.63837	1.66234	1.39934	1.95294	1.79822	1.89184	1.67427	1.05884	2.4878	3.1667	2.60656	3.29281	3.08762	1.24711	2.45379	2.22035	1.29706	2.51601	1.50973	2.1685	3.34379	1.0066	1.40774	2.97492	1.12437	1.3289	2.88374
Cell_0133	AMPKARt2	EAA 1.000000e-01 X + Insulin 10000 ng/ml	0.665496	0.678609	0.715323	0.481448	0.71021	0.49163	0.660848	0.536077	0.632024	0.408647	0.58922	0.696743	0.65111	0.545228	0.574404	0.520967	0.547818	0.447483	0.644184	0.66638	0.636628	0.595101	0.58804	0.549178	0.561393	0.517105	0.622878	0.666337	0.707347	0.642128	0.573161	0.62874	0.649741	0.554134	0.570994	0.711074	0.597052	0.658535	0.612825	0.663497	0.56325	0.493583	0.544251	0.634772	0.541438	0.572962	0.697762
Cell_0134	TFEB_TR	EAA 1.000000e-01 X + Insulin 10000 ng/ml	2.69888	1.00586	1.09784	0.616972	2.22566	2.21725	1.35385	1.62846	0.980344	1.42222	1.39635	0.86959	1.12703	1.85576	1.09095	0.835828	2.01678	1.74262	2.43099	1.94673	1.43214	1.48228	1.15735	1.05298	1.96249	1.65536	1.02373	1.43562	2.35191	0.821491	1.91674	0.781153	1.12882	1.17739	1.88593	0.863805	1.18879	1.27492	0.802274	2.05514	2.54666	0.723788	1.0685	1.68399	0.791761	0.979267	1.30133
Cell_0134	FOXO_TR	EAA 1.000000e-01 X + Insulin 10000 ng/ml	3.49227	1.68823	2.48022	1.92559	1.80645	2.56812	2.94917	2.24278	2.7416	1.7509	1.67556	2.45748	2.07897	2.09737	2.44146	1.35812	2.26586	2.87994	2.61899	1.85548	2.57734	1.70533	1.56304	1.94739	1.75551	2.30173	1.67385	1.04004	2.78973	3.12969	2.62744	3.28483	3.03563	1.28927	2.42459	1.62939	1.26974	2.5222	1.50579	2.25411	3.26331	1.06408	1.46885	2.82306	1.17203	1.41131	2.78648
Cell_0134	AMPKARt2	EAA 1.000000e-01 X + Insulin 10000 ng/ml	0.674062	0.684629	0.70649	0.467167	0.706043	0.480165	0.655075	0.539603	0.628577	0.402294	0.601231	0.705748	0.651383	0.55291	0.578569	0.519916	0.558038	0.456976	0.660958	0.655004	0.635696	0.60378	0.595455	0.545835	0.561471	0.583109	0.611513	0.663304	0.730103	0.649824	0.571799	0.62586	0.646661	0.5578	0.569668	0.589	0.591097	0.671664	0.633957	0.679723	0.578697	0.506966	0.554561	0.63391	0.555412	0.554051	0.709251
Cell_0135	TFEB_TR	EAA 1.000000e-01 X + Insulin 10000 ng/ml	3.02388	1.16813	1.08969	0.630601	2.89624	2.25619	1.36642	1.6374	0.964479	1.49263	1.42019	0.834141	1.11799	1.96023	1.19885	0.919547	2.05812	1.71099	2.233	2.15825	1.43593	1.57232	1.14649	1.0648	2.48257	1.65051	0.920137	1.56523	1.87046	0.824214	2.06775	0.792527	1.24043	1.36726	2.11344	0.789433	1.26725	1.34872	0.871162	2.08158	2.44699	0.71313	1.0993	1.42395	0.805464	0.991658	1.12434
Cell_0135	FOXO_TR	EAA 1.000000e-01 X + Insulin 10000 ng/ml	3.36906	1.69062	2.40726	1.97774	1.83358	2.61956	2.82561	2.22526	2.61689	1.73965	1.7876	2.4537	2.12039	2.08961	2.50821	1.35181	2.2847	2.82658	2.60003	1.92234	2.56188	1.76987	2.20292	2.02072	1.74674	2.5105	1.68921	1.05558	2.87666	3.06154	2.61896	3.14486	1.65877	1.29997	2.46434	1.72678	1.28497	2.47949	1.54777	2.2697	3.13512	1.10676	1.44671	2.78383	1.24043	1.46784	2.72959
Cell_0135	AMPKARt2	EAA 1.000000e-01 X + Insulin 10000 ng/ml	0.666258	0.678223	0.712065	0.464983	0.709897	0.46067	0.627526	0.528573	0.610053	0.398856	0.604955	0.714824	0.670895	0.55349	0.57923	0.511423	0.544106	0.446312	0.66119	0.656055	0.628845	0.591481	0.595005	0.544845	0.560223	0.59841	0.608847	0.665643	0.722632	0.64346	0.57036	0.618587	0.475444	0.572859	0.568914	0.592208	0.589398	0.677621	0.605797	0.685683	0.567387	0.488166	0.551992	0.642158	0.566764	0.551488	0.713176
Cell_0136	TFEB_TR	EAA 1.000000e-01 X + Insulin 10000 ng/ml	3.11366	1.22864	1.14382	0.639444	2.25439	2.45503	1.49407	1.55269	0.953142	1.56909	1.42515	0.853959	1.20058	1.89856	1.26192	0.921902	1.9322	1.75489	3.58567	2.60421	1.42194	1.79042	1.25929	1.17221	2.54783	1.63467	0.860868	1.66863	1.64642	1.18822	2.36597	0.806419	1.2686	1.35003	2.09814	0.825478	1.22455	1.33295	1.06348	2.02995	2.46453	0.745271	1.08674	1.50881	0.847818	0.955285	1.03625
Cell_0136	FOXO_TR	EAA 1.000000e-01 X + Insulin 10000 ng/ml	3.3351	1.67062	2.30883	2.02015	1.88645	2.49869	2.62261	2.27965	2.52242	1.68358	1.81855	2.35755	2.04758	1.9993	2.54158	1.37932	2.37948	2.78895	2.57437	2.26538	2.52431	1.76663	2.80025	2.00932	1.79803	2.53053	1.68553	1.08379	2.87437	2.59893	2.5342	3.0194	1.56051	1.283	2.48555	1.73203	1.31649	2.39431	1.57697	2.22674	3.01555	1.12215	1.42006	2.74027	1.24485	1.43135	2.78717
Cell_0136	AMPKARt2	EAA 1.000000e-01 X + Insulin 10000 ng/ml	0.665314	0.68171	0.716746	0.479154	0.714129	0.468357	0.615073	0.526892	0.614865	0.400061	0.602021	0.719616	0.663673	0.555085	0.571316	0.530252	0.519454	0.455565	0.641634	0.675499	0.625633	0.576755	0.59386	0.552249	0.559035	0.569851	0.614196	0.665767	0.702802	0.671745	0.570526	0.618519	0.461228	0.579877	0.572423	0.587499	0.601347	0.672089	0.579959	0.67713	0.566566	0.48261	0.536134	0.649767	0.566733	0.552645	0.716096
Cell_0137	TFEB_TR	EAA 1.000000e-01 X + Insulin 10000 ng/ml	2.71885	1.04347	1.25901	0.695821	1.56273	2.4131	1.81717	1.37788	0.919265	1.62945	1.34315	0.882353	1.20131	1.73903	1.11631	0.758479	1.81032	1.75221	4.67857	2.42038	1.38908	1.6347	1.24931	1.15459	2.16701	1.6307	0.968765	1.5404	2.02107	1.18995	2.1086	0.829385	1.19655	1.22987	2.02156	0.960996	1.12628	1.236	1.18372	1.9512	2.3853	0.773359	1.10719	1.85926	0.829674	0.898022	1.05982
Cell_0137	FOXO_TR	EAA 1.000000e-01 X + Insulin 10000 ng/ml	3.33121	1.57539	2.38444	2.04767	1.91287	2.35915	2.53616	2.29804	2.57714	1.63139	1.772	2.2985	1.98572	2.10971	2.49458	1.37125	2.44559	2.79542	2.55693	2.55663	2.35857	1.72398	3.00353	1.99244	1.88978	2.57666	2.52807	1.08168	2.82387	2.45534	2.44855	3.04572	1.52156	1.28526	2.45906	1.71482	1.3135	2.34028	1.55636	2.17065	2.81889	1.11759	1.46733	2.75598	1.21153	1.37494	2.69868
Cell_0137	AMPKARt2	EAA 1.000000e-01 X + Insulin 10000 ng/ml	0.665433	0.691693	0.711687	0.479954	0.708452	0.481356	0.62702	0.535621	0.632812	0.400711	0.600155	0.723825	0.649736	0.558242	0.570105	0.534289	0.527752	0.471441	0.637566	0.672093	0.634245	0.57218	0.59318	0.576469	0.561662	0.554686	0.690843	0.653149	0.694546	0.680197	0.578251	0.619667	0.465655	0.578507	0.567573	0.578005	0.613442	0.669896	0.59311	0.675154	0.56683	0.500239	0.517712	0.651085	0.55431	0.550932	0.71641
Cell_0138	TFEB_TR	EAA 1.000000e-01 X + Insulin 10000 ng/ml	2.47915	0.946149	1.36144	0.808154	2.13551	2.38129	1.82908	1.46844	0.864955	1.71327	1.37254	0.877466	1.14255	1.89488	1.05085	0.715442	1.80432	1.72115	3.85697	2.23173	1.31372	1.54159	1.19526	0.90696	2.07289	1.60075	1.11399	1.45793	2.18138	1.16268	1.69315	0.8411	1.21507	1.17953	2.08565	0.993867	1.18434	1.21435	1.16158	1.91856	2.12356	0.760059	1.18342	1.58897	0.800997	0.8786	1.02304
Cell_0138	FOXO_TR	EAA 1.000000e-01 X + Insulin 10000 ng/ml	3.27636	1.55017	2.5248	2.0213	1.89568	2.37825	2.61369	2.21108	2.66755	1.63137	2.07746	2.38491	2.07362	2.53984	2.48549	1.37549	2.43062	2.87635	2.63411	2.61663	2.20979	1.68163	3.07264	1.21773	1.98021	2.51295	2.4535	1.07349	2.74103	2.43755	2.42657	3.23587	1.46214	1.3085	2.49919	1.6724	1.32179	2.36125	1.53013	2.19201	2.75068	1.07912	1.52613	2.85023	1.22978	1.38197	2.52966
Cell_0138	AMPKARt2	EAA 1.000000e-01 X + Insulin 10000 ng/ml	0.652364	0.69108	0.711328	0.47312	0.707328	0.474601	0.630815	0.536163	0.634303	0.396475	0.607529	0.723773	0.661933	0.570392	0.580521	0.509939	0.543253	0.474023	0.651691	0.655778	0.643393	0.567221	0.574349	0.596011	0.568826	0.550808	0.685569	0.646285	0.703268	0.693858	0.586444	0.614073	0.477836	0.57608	0.554556	0.581026	0.616095	0.665813	0.59512	0.674064	0.553931	0.511424	0.525218	0.644933	0.545626	0.57274	0.701636
Cell_0139	TFEB_TR	EAA 1.000000e-01 X + Insulin 10000 ng/ml	2.78095	0.988636	1.45147	0.914707	2.61902	2.42134	1.57733	1.99141	0.889007	1.75719	1.76693	0.923779	1.30108	2.12719	1.14127	0.968098	1.97207	1.75424	3.1243	2.28337	0.795852	1.84228	1.17319	1.04477	2.08446	1.55525	1.09734	1.63553	1.84056	1.14018	1.66439	0.826455	1.27865	1.06428	2.0213	0.90529	1.24013	1.31559	1.13592	1.85599	2.06069	0.754206	1.22057	1.20668	0.864829	0.950434	0.975341
Cell_0139	FOXO_TR	EAA 1.000000e-01 X + Insulin 10000 ng/ml	3.21901	1.55028	2.63688	1.94373	1.85825	2.48045	2.66623	2.25091	2.68149	1.62095	2.84222	2.4566	2.11985	2.85589	2.49178	1.42383	2.39182	2.88954	2.72246	2.62121	1.30009	1.69126	3.1246	1.21673	1.97693	2.40391	2.45569	1.09314	2.74384	2.46271	2.43023	3.10035	1.39117	1.33142	2.49963	1.62209	1.3544	2.37081	1.4936	2.27111	2.81544	1.0655	1.53653	2.90607	1.27494	1.47187	2.55039
Cell_0139	AMPKARt2	EAA 1.000000e-01 X + Insulin 10000 ng/ml	0.645984	0.691119	0.705365	0.474646	0.719371	0.46192	0.6207	0.53579	0.63252	0.391147	0.621904	0.719822	0.673005	0.598426	0.586081	0.515118	0.542832	0.4844	0.659591	0.656875	0.538474	0.57347	0.56957	0.625555	0.575725	0.53871	0.693201	0.655101	0.711266	0.695401	0.578397	0.605167	0.485539	0.573771	0.550743	0.595067	0.619703	0.652229	0.576289	0.670882	0.551182	0.511841	0.54184	0.628656	0.551319	0.581269	0.692891
Cell_0140	TFEB_TR	EAA 1.000000e-01 X + Insulin 10000 ng/ml	2.53094	0.975887	1.52638	0.991029	2.47448	2.43534	1.69963	2.29876	0.992907	1.73828	1.97064	0.979882	1.42699	1.979	1.15566	1.09702	2.21532	1.07683	3.37757	2.14158	0.765419	2.02419	1.11495	1.20791	1.87768	1.57098	0.991267	1.7653	1.45214	1.22751	1.59669	0.809417	1.22194	0.993556	1.9919	0.9197	1.15094	1.49856	1.26841	1.76534	2.15943	0.772239	1.23509	1.62028	0.875917	1.02172	0.975031
Cell_0140	FOXO_TR	EAA 1.000000e-01 X + Insulin 10000 ng/ml	3.10848	1.46254	2.82687	1.87133	1.9585	2.66106	2.63993	2.44807	2.60996	1.58777	3.36037	2.37471	2.02689	2.87555	2.46155	1.42711	2.34731	1.58653	2.69302	2.63496	1.26439	1.89472	3.14077	1.20361	1.92543	2.5097	2.42565	1.10555	2.75845	2.52931	2.39441	2.58382	1.38299	1.3637	2.36864	1.71424	1.3548	2.32661	1.4575	2.2805	2.78049	1.10154	1.53271	2.94415	1.26893	1.55157	2.60143
Cell_0140	AMPKARt2	EAA 1.000000e-01 X + Insulin 10000 ng/ml	0.660361	0.689525	0.694692	0.483289	0.725473	0.463207	0.623969	0.557068	0.625087	0.389745	0.635667	0.708191	0.663854	0.608439	0.576775	0.52993	0.546421	0.596848	0.662192	0.654646	0.537492	0.597222	0.599061	0.621853	0.574001	0.529164	0.699828	0.656309	0.709823	0.682073	0.564105	0.598457	0.485765	0.573835	0.556825	0.60596	0.625532	0.642084	0.575033	0.677985	0.551863	0.508239	0.519123	0.616777	0.567835	0.558395	0.702211
Cell_0141	TFEB_TR	EAA 1.000000e-01 X + Insulin 10000 ng/ml	1.99711	0.907512	1.5209	1.06065	2.56133	2.74858	1.84023	2.00101	1.03395	1.74564	1.41973	0.98232	1.20286	1.87623	1.34346	0.929817	2.17116	1.2755	3.51263	2.29828	0.766563	1.81534	1.18014	1.11248	1.78675	1.61334	0.952248	1.64706	1.21835	1.35935	1.30564	0.800276	1.16953	1.06874	2.27349	1.04274	1.09886	1.58397	1.36553	1.77557	2.07634	0.760966	1.26129	2.0858	0.808641	0.963936	0.963284
Cell_0141	FOXO_TR	EAA 1.000000e-01 X + Insulin 10000 ng/ml	2.9752	1.67994	2.97285	1.87406	2.36145	2.93567	2.60323	2.52355	2.54882	1.58284	3.32201	2.27451	1.97313	2.84592	2.08074	1.40454	2.32809	1.64865	2.68287	2.57658	1.24564	2.24973	3.19172	1.20902	1.92794	2.61267	2.3209	1.09885	2.64119	2.60062	2.37377	2.31121	1.37886	1.378	2.3575	1.87543	1.3355	2.35237	1.50545	2.21926	2.73716	1.09919	1.58047	2.95168	1.22657	1.58201	2.50251
Cell_0141	AMPKARt2	EAA 1.000000e-01 X + Insulin 10000 ng/ml	0.669139	0.688019	0.705587	0.499593	0.726335	0.482185	0.629771	0.587433	0.611439	0.386758	0.641094	0.692168	0.661176	0.584524	0.514508	0.522673	0.553989	0.606909	0.669244	0.644363	0.545686	0.611748	0.607413	0.618126	0.568567	0.527222	0.689214	0.642261	0.716012	0.670995	0.567942	0.590649	0.483921	0.580609	0.560188	0.610785	0.620795	0.640397	0.575575	0.685728	0.535034	0.512692	0.489725	0.625885	0.576191	0.561991	0.702736
Cell_0142	TFEB_TR	EAA 1.000000e-01 X + Insulin 10000 ng/ml	2.60046	0.825597	1.44747	1.10556	2.53764	3.00313	1.52538	1.7979	1.01024	1.7604	1.0777	0.643266	1.01948	2.07193	1.78784	0.82318	1.91201	1.2233	3.86604	2.79491	0.774226	1.81676	1.33627	1.06549	1.82314	1.59721	1.00057	1.53613	1.1501	1.3273	1.22128	0.783795	1.19734	1.15883	2.31458	1.09802	1.11724	1.47807	1.39944	1.81601	1.96403	0.729351	1.21414	1.8535	0.898847	0.89281	0.990392
Cell_0142	FOXO_TR	EAA 1.000000e-01 X + Insulin 10000 ng/ml	3.0105	2.29544	2.9452	1.9321	2.86383	3.13353	2.52006	2.49842	2.54075	1.58618	3.19174	1.78252	1.96454	2.78782	2.14804	1.48729	2.36107	1.6814	2.7158	2.48258	1.24233	2.44957	3.14774	1.30101	1.89854	2.51324	2.30226	1.09929	2.52463	2.59614	2.41072	2.3244	1.34697	1.35361	2.49529	1.89549	1.34372	2.42423	1.57299	2.19138	2.81859	1.06294	1.64796	2.85945	1.21699	1.61888	2.40989
Cell_0142	AMPKARt2	EAA 1.000000e-01 X + Insulin 10000 ng/ml	0.660198	0.712224	0.721667	0.509277	0.734076	0.494048	0.616927	0.59559	0.616876	0.381112	0.633979	0.443155	0.666073	0.575093	0.512623	0.520957	0.563516	0.60748	0.666751	0.655281	0.552706	0.606954	0.578797	0.627405	0.571835	0.525914	0.679159	0.635652	0.71891	0.670151	0.58629	0.585922	0.488209	0.594002	0.56753	0.599466	0.613471	0.636367	0.571077	0.679428	0.525842	0.524341	0.510358	0.6385	0.560471	0.584836	0.693528
Cell_0143	TFEB_TR	EAA 1.000000e-01 X + Insulin 10000 ng/ml	3.21871	0.802139	1.33728	1.10295	2.33238	3.04888	1.40196	1.87102	0.63551	1.70911	1.5601	0.662917	1.13237	2.03837	1.74867	0.861694	1.85131	1.13506	4.09227	2.67969	0.778991	2.13125	1.17784	1.31637	1.80958	1.56676	1.03716	1.55502	1.32017	1.24576	1.51884	0.772793	1.29765	1.24363	1.78397	1.03513	1.10435	1.32322	1.57337	1.75004	1.9405	0.729208	1.14826	1.62363	1.03053	0.923335	1.11678
Cell_0143	FOXO_TR	EAA 1.000000e-01 X + Insulin 10000 ng/ml	3.15553	2.67657	2.91447	1.95135	3.0616	3.29824	2.43502	2.5227	1.30972	1.55564	3.16067	1.78531	1.89283	2.69834	2.15776	1.6088	2.331	1.70295	2.6185	2.4668	1.25143	2.3745	2.96197	1.39786	1.82955	2.46335	2.37526	1.08591	2.55558	2.67661	2.45482	2.24777	1.36622	1.3403	2.52127	1.84638	1.38559	2.39839	1.59757	2.23981	2.84618	1.08154	1.63133	2.86578	1.25083	1.6105	2.37918
Cell_0143	AMPKARt2	EAA 1.000000e-01 X + Insulin 10000 ng/ml	0.661365	0.740973	0.71093	0.497562	0.73187	0.486969	0.612706	0.579453	0.570704	0.389416	0.623019	0.438086	0.656906	0.591608	0.513728	0.517944	0.566318	0.616356	0.65411	0.674133	0.557746	0.594639	0.571189	0.628768	0.578241	0.529084	0.685083	0.641899	0.705205	0.670091	0.599067	0.59389	0.490346	0.600051	0.578194	0.581754	0.620497	0.628326	0.588017	0.672686	0.537842	0.504604	0.538456	0.634687	0.543899	0.591982	0.695184
Cell_0144	TFEB_TR	EAA 1.000000e-01 X + Insulin 10000 ng/ml	2.85053	0.882232	1.25777	1.0955	2.68064	0.550032	1.49287	1.58321	0.605818	1.6447	1.7312	0.66013	1.18671	1.89617	1.6899	0.928968	1.73053	1.19137	3.1555	2.22637	0.784984	1.9784	0.880045	1.35507	1.80001	1.57797	0.995409	1.54449	1.33299	1.32807	1.83102	0.779731	1.49445	1.24178	1.33485	0.927658	1.10556	1.1913	1.53406	1.67306	1.86738	0.753237	1.20547	1.71022	0.985774	0.949888	1.25284
Cell_0144	FOXO_TR	EAA 1.000000e-01 X + Insulin 10000 ng/ml	3.15809	2.66121	2.9404	1.91621	2.97179	1.69475	2.48439	2.51088	1.28334	1.50507	3.12993	1.79858	1.84702	2.74826	2.15525	1.60483	2.24079	1.6779	2.56447	2.57509	1.25894	2.17597	2.91404	1.3696	1.87042	2.52956	2.35838	1.07004	2.61684	2.82309	2.44551	2.24135	1.42894	1.3398	2.48264	1.8446	1.46419	2.38471	1.76228	2.30525	2.78665	1.13162	1.58468	3.06385	1.27224	1.5933	2.35934
Cell_0144	AMPKARt2	EAA 1.000000e-01 X + Insulin 10000 ng/ml	0.675403	0.738953	0.699395	0.488006	0.720993	0.737943	0.629543	0.561473	0.56048	0.407326	0.619434	0.41901	0.648863	0.589746	0.513231	0.508378	0.547985	0.624986	0.654944	0.669713	0.562428	0.581887	0.590006	0.632295	0.577328	0.538868	0.687562	0.64303	0.708615	0.661257	0.597152	0.599196	0.486487	0.590335	0.575561	0.591017	0.627133	0.624402	0.594895	0.67327	0.543661	0.478085	0.529778	0.629552	0.545811	0.608137	0.69799
Cell_0145	TFEB_TR	EAA 1.000000e-01 X + Insulin 10000 ng/ml	2.95209	0.881754	0.792907	1.10711	2.74817	0.497251	1.35567	1.46339	0.601264	1.64106	1.33336	0.640581	1.13072	2.06432	1.61532	0.983257	1.4485	1.26234	2.57767	2.23256	0.783288	1.5788	0.989909	1.11706	1.74838	1.58986	0.95738	1.50886	1.12299	1.37399	1.84084	0.79562	1.51654	1.10379	1.3572	0.907918	1.12391	1.11838	1.1795	1.73607	1.86495	0.792475	1.3025	1.60158	1.03685	0.938468	1.24218
Cell_0145	FOXO_TR	EAA 1.000000e-01 X + Insulin 10000 ng/ml	3.05727	2.63541	1.532	1.85842	2.92639	1.65927	2.60125	2.45608	1.27483	1.48036	3.16307	1.81615	1.8876	2.82046	2.17645	1.58301	2.23449	1.62674	2.70847	2.73526	1.25769	1.96332	3.08824	1.32586	1.96931	2.57455	2.29439	1.09168	2.61769	2.78546	2.31139	2.48706	1.4639	1.31983	2.51535	1.83683	1.51468	2.52191	2.02785	2.30154	2.81676	1.15192	1.62188	3.12603	1.26177	1.64485	2.37558
Cell_0145	AMPKARt2	EAA 1.000000e-01 X + Insulin 10000 ng/ml	0.674039	0.736913	0.537932	0.497808	0.724535	0.74314	0.633566	0.559903	0.548297	0.404153	0.622849	0.416744	0.656615	0.578809	0.525955	0.512232	0.542919	0.62367	0.661898	0.662737	0.559937	0.581265	0.591476	0.641941	0.574587	0.545576	0.681734	0.637595	0.730566	0.662984	0.583166	0.589739	0.485047	0.587354	0.571601	0.600647	0.621159	0.627092	0.566763	0.669138	0.539583	0.51017	0.522635	0.63783	0.543911	0.611871	0.690534
Cell_0146	TFEB_TR	EAA 1.000000e-01 X + Insulin 10000 ng/ml	2.98713	0.74722	0.784016	1.1145	1.98165	0.601337	1.51547	2.21837	0.58028	1.68934	1.33321	0.654734	1.15984	2.10693	1.50411	0.927171	1.75365	1.29819	3.32019	2.2804	0.788708	1.79294	1.23892	1.05443	1.80458	1.57146	1.01244	1.52198	1.31056	1.29921	1.63597	0.820613	1.31593	1.06317	1.55881	1.03727	1.10415	1.21414	1.14649	1.83452	1.91916	0.85607	1.30066	1.48305	1.25155	0.944742	1.0684
Cell_0146	FOXO_TR	EAA 1.000000e-01 X + Insulin 10000 ng/ml	3.04805	2.68776	1.62181	1.80054	2.97451	1.62604	2.59736	2.45634	1.25228	1.50279	3.18415	1.86343	1.8856	2.74027	2.20069	1.66897	2.19335	1.66738	2.75055	2.80185	1.27468	1.80355	3.23058	1.37925	2.01153	2.62976	2.33655	1.10444	2.65937	2.73932	2.12873	2.71353	1.45999	1.3068	2.54153	1.86428	1.47203	2.66732	2.03531	2.27645	2.84345	1.15878	1.6447	3.07146	1.26374	1.66999	2.35433
Cell_0146	AMPKARt2	EAA 1.000000e-01 X + Insulin 10000 ng/ml	0.667365	0.752936	0.538713	0.50671	0.729027	0.740481	0.623818	0.573518	0.560899	0.391194	0.629076	0.438505	0.660579	0.591441	0.546535	0.512674	0.55332	0.623792	0.656768	0.67391	0.55622	0.594812	0.586103	0.633205	0.576792	0.546183	0.687132	0.642217	0.72866	0.68728	0.573823	0.587777	0.480985	0.602903	0.575859	0.565931	0.623407	0.629931	0.54968	0.670466	0.539478	0.543016	0.530502	0.639779	0.537032	0.583999	0.691264
Cell_0147	TFEB_TR	EAA 1.000000e-01 X + Insulin 10000 ng/ml	1.87963	0.70205	0.846021	1.12609	1.68841	0.64265	1.77488	2.6315	0.575964	1.71634	1.56017	0.690179	1.08102	1.8292	1.64395	0.82542	2.43309	1.38554	3.91777	2.10083	0.804127	1.97929	1.16435	1.12304	2.0315	1.53686	1.0414	1.49537	1.60436	1.29508	1.56412	0.844596	1.43186	1.14536	1.73051	1.28827	1.09261	1.31361	1.36769	1.71358	1.84379	0.914168	1.25476	1.6644	1.30901	0.975352	0.961598
Cell_0147	FOXO_TR	EAA 1.000000e-01 X + Insulin 10000 ng/ml	3.06961	2.73894	1.59406	1.78512	2.97215	1.67748	2.44432	2.48519	1.25684	1.52373	3.0273	1.9996	1.80244	2.67066	2.24813	1.6964	2.03816	1.76405	2.63219	2.71783	1.313	1.72609	3.18873	1.41617	2.05639	2.66133	2.41985	1.09361	2.76699	2.88344	2.07654	2.69836	1.42948	1.31901	2.50431	1.97823	1.4523	2.69724	1.78304	2.32483	2.73015	1.18408	1.58693	3.25095	1.27328	1.90273	2.30352
Cell_0147	AMPKARt2	EAA 1.000000e-01 X + Insulin 10000 ng/ml	0.682204	0.751534	0.552668	0.5081	0.719535	0.742969	0.629188	0.588542	0.576521	0.401373	0.632238	0.447797	0.655072	0.60106	0.543054	0.506461	0.527942	0.618171	0.658234	0.673922	0.555695	0.602226	0.594008	0.618705	0.581196	0.546005	0.696346	0.657747	0.712812	0.696264	0.580658	0.594597	0.472571	0.609676	0.566536	0.527808	0.633318	0.626031	0.55831	0.684368	0.534272	0.510769	0.529109	0.624353	0.541167	0.59064	0.710834
Cell_0148	TFEB_TR	EAA 1.000000e-01 X + Insulin 10000 ng/ml	1.8725	0.764796	0.916731	1.14511	1.94773	0.61481	1.44579	1.89806	0.607498	1.68025	1.54057	0.69295	0.958806	1.68446	1.8729	0.790607	2.46114	1.45439	3.99077	2.043	0.809869	1.6045	1.03715	1.13679	1.99764	1.50782	0.965636	1.45085	1.44382	1.21016	1.94122	0.86368	1.69574	1.14546	1.74585	1.60725	1.12134	1.20152	1.36313	1.46164	1.84728	0.950609	1.29954	1.71962	1.30559	1.07326	1.05243
Cell_0148	FOXO_TR	EAA 1.000000e-01 X + Insulin 10000 ng/ml	2.98191	2.71406	1.57953	1.79343	2.90741	1.80193	2.2646	2.47384	1.29099	1.50596	2.8408	2.16263	1.7634	2.68698	2.34406	1.63421	2.04336	1.79307	2.61814	2.60857	1.33643	1.67141	3.09458	1.38831	2.09634	2.62864	2.45887	1.10581	2.83482	2.9272	2.1237	2.53207	1.41245	1.35595	2.35743	2.0613	1.46968	2.68327	1.57365	2.36789	2.64312	1.21759	1.61116	3.39028	1.24914	2.5495	2.3592
Cell_0148	AMPKARt2	EAA 1.000000e-01 X + Insulin 10000 ng/ml	0.696023	0.740442	0.5542	0.510955	0.710154	0.745322	0.635167	0.59337	0.561226	0.411305	0.625748	0.439701	0.65488	0.591734	0.530758	0.500192	0.500216	0.611427	0.668154	0.659181	0.553991	0.599165	0.589445	0.629081	0.582438	0.543356	0.688776	0.663241	0.714225	0.680079	0.588948	0.586147	0.468136	0.600255	0.551595	0.5304	0.6291	0.621162	0.568181	0.681361	0.524753	0.487504	0.530745	0.627851	0.539801	0.623139	0.727663
Cell_0149	TFEB_TR	EAA 1.000000e-01 X + Insulin 10000 ng/ml	3.06554	0.778385	0.915719	1.15391	1.82382	0.701078	1.329	1.39353	0.608861	1.66706	1.6265	0.699367	1.17439	1.76115	2.09131	0.868907	2.21427	1.40669	3.83363	1.96768	0.813865	1.82795	1.0925	1.13628	1.8304	1.50228	0.984097	1.51449	1.35122	1.12776	2.22045	0.900318	1.44809	1.12566	1.59417	1.76475	1.14088	1.16151	1.36678	1.44187	1.95686	0.978781	1.42684	1.49331	1.38529	1.19487	1.15011
Cell_0149	FOXO_TR	EAA 1.000000e-01 X + Insulin 10000 ng/ml	2.8443	2.60231	1.62541	1.78914	2.80692	1.97483	2.16659	2.40568	1.27856	1.50242	2.87661	2.19188	1.79577	2.65368	2.42355	1.67623	2.22272	1.80187	2.66385	2.58119	1.33317	1.64345	3.1016	1.36568	2.06952	2.65763	2.49583	1.11605	2.84263	2.78127	2.17232	2.38432	1.44113	1.36221	2.14491	2.04145	1.39901	2.70262	1.46993	2.37803	2.63541	1.2107	1.77962	3.17054	1.2133	3.00367	2.4468
Cell_0149	AMPKARt2	EAA 1.000000e-01 X + Insulin 10000 ng/ml	0.682419	0.75062	0.53893	0.507841	0.700951	0.735055	0.622333	0.582657	0.551104	0.399437	0.617625	0.429988	0.661205	0.596063	0.537668	0.474094	0.51902	0.620392	0.661964	0.664179	0.556644	0.599865	0.570836	0.636555	0.579625	0.539109	0.676256	0.649586	0.715633	0.679451	0.593016	0.577907	0.467268	0.600303	0.557908	0.542136	0.626874	0.62772	0.58369	0.662662	0.531068	0.508552	0.540267	0.660254	0.536079	0.614875	0.729598
Cell_0150	TFEB_TR	EAA 1.000000e-01 X + Insulin 10000 ng/ml	2.65056	0.755205	0.882051	1.17134	1.72835	0.720341	1.70676	1.73477	0.586525	1.7042	1.71223	0.741805	1.36656	1.8848	2.14848	1.14274	2.43989	1.36119	3.35491	1.84811	0.820267	2.59378	1.20982	1.05682	1.97893	1.50636	1.16015	1.61189	1.43077	1.46937	1.57977	0.922889	1.29261	1.13607	1.57462	1.61115	1.14172	1.38872	1.38825	1.6194	1.80586	0.989872	1.47711	1.45914	1.4074	1.2	1.13862
Cell_0150	FOXO_TR	EAA 1.000000e-01 X + Insulin 10000 ng/ml	2.80384	2.57795	1.63984	1.81261	2.73713	2.15031	2.16314	2.34142	1.2626	1.52883	3.05627	2.09328	1.79571	2.59172	2.43386	1.7741	2.27309	1.83962	2.62651	2.54765	1.32155	1.62673	3.10587	1.34627	2.06704	2.72142	2.53848	1.11498	2.83439	2.69982	2.18593	2.35003	1.45628	1.28057	2.06705	1.96647	1.51361	2.7662	1.39789	2.51013	2.55919	1.15332	1.99807	2.96985	1.1912	2.96108	2.53204
Cell_0150	AMPKARt2	EAA 1.000000e-01 X + Insulin 10000 ng/ml	0.664366	0.757596	0.535943	0.505013	0.690357	0.732978	0.619303	0.570924	0.568101	0.39575	0.61824	0.416868	0.66682	0.610912	0.547056	0.451989	0.531066	0.623354	0.654284	0.675796	0.557836	0.603355	0.560259	0.610469	0.580273	0.542191	0.676623	0.638084	0.704153	0.688552	0.601896	0.589244	0.470922	0.607975	0.570842	0.538116	0.64619	0.637498	0.591787	0.662378	0.542975	0.506045	0.536038	0.668356	0.548462	0.602058	0.731045
Cell_0151	TFEB_TR	EAA 1.000000e-01 X + Insulin 10000 ng/ml	1.49254	0.720266	0.877909	1.1878	1.86545	0.563726	1.56906	1.79848	0.585798	1.68428	1.43375	0.761139	1.10402	1.89558	2.16582	1.26184	2.5212	1.40653	3.31445	2.06942	0.837153	2.40493	1.32	0.980937	1.96069	1.50517	1.29034	1.60155	1.26718	1.75744	0.850626	0.882708	1.77079	1.04613	1.68706	1.46521	1.19153	1.4434	1.15278	1.68716	1.59354	0.993146	1.45101	1.83322	1.49368	1.14401	0.494296
Cell_0151	FOXO_TR	EAA 1.000000e-01 X + Insulin 10000 ng/ml	2.91815	2.57935	1.64707	1.83155	2.76577	2.17132	2.20964	2.35024	1.28484	1.52621	3.09062	2.01098	1.7465	2.57946	2.43934	1.7932	2.25661	1.82743	2.53251	2.46102	1.33193	1.56505	2.98925	1.37266	2.06483	2.69989	2.53777	1.09603	2.81591	2.6924	2.13963	2.50238	1.41511	1.38499	2.08947	1.90714	2.04138	2.85191	1.35251	2.67967	2.46546	1.11678	2.22697	2.98971	1.17974	2.98077	1.41376
Cell_0151	AMPKARt2	EAA 1.000000e-01 X + Insulin 10000 ng/ml	0.661293	0.746223	0.546671	0.5232	0.692444	0.749053	0.634123	0.579857	0.574969	0.402511	0.620485	0.417454	0.668599	0.601038	0.552899	0.461865	0.516383	0.607515	0.660996	0.663842	0.544335	0.598858	0.552488	0.595624	0.588087	0.547956	0.681622	0.643619	0.701825	0.679661	0.603635	0.598184	0.474301	0.603064	0.57383	0.534481	0.666911	0.632709	0.569926	0.671312	0.532691	0.483685	0.524244	0.650792	0.551094	0.606449	0.646168
Cell_0152	TFEB_TR	EAA 1.000000e-01 X + Insulin 10000 ng/ml	1.46867	0.648988	0.888081	1.16286	1.74406	0.525439	1.19465	1.37886	0.600168	1.62743	1.14092	0.730859	0.936143	1.72083	2.75466	0.942338	1.99196	1.47898	3.54905	2.592	0.88825	1.74317	1.22645	1.15264	1.52321	1.51754	1.38464	1.49912	1.36719	1.5022	1.25658	0.842228	1.88501	0.993654	1.59091	1.59406	1.29514	1.17364	1.13445	1.64424	1.73313	1.01232	1.50695	0.688478	1.59669	1.16789	0.463952
Cell_0152	FOXO_TR	EAA 1.000000e-01 X + Insulin 10000 ng/ml	3.03841	2.46073	1.69309	1.76566	2.77991	2.12314	2.2612	2.38866	1.27527	1.51548	2.94618	1.98537	1.73291	2.58304	2.49092	1.78721	2.37987	1.79899	2.44236	2.43639	1.36142	1.56842	2.87844	1.48148	1.84921	2.6713	2.46672	1.03159	2.81977	2.66686	2.2241	2.70839	1.35758	1.96896	2.04096	1.87995	2.45823	2.93996	1.32375	2.62425	2.45472	1.13232	2.41799	1.26707	1.19045	3.16062	1.49267
Cell_0152	AMPKARt2	EAA 1.000000e-01 X + Insulin 10000 ng/ml	0.66052	0.739128	0.552488	0.546855	0.700585	0.752605	0.631479	0.590142	0.57199	0.396698	0.622195	0.444586	0.667129	0.579691	0.556102	0.476994	0.525208	0.597852	0.661146	0.647241	0.534758	0.589179	0.550471	0.622768	0.592003	0.546277	0.688356	0.65288	0.713857	0.674324	0.601601	0.598843	0.463388	0.595145	0.57852	0.533923	0.671883	0.624145	0.55456	0.67037	0.51881	0.494263	0.525405	0.736651	0.540348	0.583294	0.648264
Cell_0153	TFEB_TR	EAA 1.000000e-01 X + Insulin 10000 ng/ml	1.57249	0.628089	0.909228	1.13274	1.77741	0.667937	1.38057	1.31895	0.624947	1.60979	1.19691	0.708111	1.15751	1.66534	3.29011	0.803456	1.62036	1.55437	3.25301	3.11589	0.9387	1.88947	0.98795	1.36362	1.37304	1.53192	1.58127	1.43092	1.84357	1.36237	2.02044	0.863983	1.36703	1.12083	1.321	1.71959	1.33303	1.10277	1.52757	1.59714	0.590587	1.03075	1.57163	0.587739	1.44385	1.2179	0.454039
Cell_0153	FOXO_TR	EAA 1.000000e-01 X + Insulin 10000 ng/ml	2.96832	2.45022	1.74543	1.69748	2.7532	2.21952	2.30779	2.39113	1.25996	1.53694	2.83234	1.98063	1.74916	2.57829	2.54845	1.78667	2.45857	1.85037	2.45429	2.44121	1.34267	1.59207	2.81042	1.51921	1.63774	2.69721	2.40262	1.12708	2.84577	2.64702	2.52705	2.64139	1.32335	2.65249	1.9621	1.81743	2.3859	2.98757	1.29998	2.46346	1.19574	1.15863	2.5571	1.21878	1.19974	3.19533	1.50267
Cell_0153	AMPKARt2	EAA 1.000000e-01 X + Insulin 10000 ng/ml	0.659186	0.730789	0.549897	0.54607	0.703031	0.740069	0.614615	0.571452	0.584237	0.390634	0.624579	0.466455	0.667667	0.578531	0.534754	0.486812	0.540118	0.597082	0.656045	0.645655	0.543718	0.587938	0.556256	0.638547	0.588055	0.54409	0.698347	0.660558	0.718742	0.685157	0.625024	0.605958	0.450398	0.600485	0.580523	0.523577	0.665276	0.630135	0.5682	0.669668	0.657934	0.512609	0.536235	0.731989	0.55185	0.569295	0.637898
Cell_0154	TFEB_TR	EAA 1.000000e-01 X + Insulin 10000 ng/ml	1.62782	0.675743	0.956223	1.14275	2.19206	0.728862	1.6023	1.60023	0.651579	1.57875	1.42804	0.752111	1.25941	1.78481	2.94026	1.11707	1.81784	1.55614	3.31837	3.27856	0.975061	2.30089	1.10081	1.29732	1.55886	1.51678	1.73705	1.4738	1.75838	1.53269	1.96677	0.885723	1.27295	1.1919	1.16529	1.58076	1.29028	0.709065	1.52012	1.53366	0.651708	1.0315	1.52017	0.58263	1.3263	1.20442	0.469727
Cell_0154	FOXO_TR	EAA 1.000000e-01 X + Insulin 10000 ng/ml	2.79505	2.53904	1.79762	1.72704	2.79992	2.31392	2.38666	2.37774	1.29875	1.52854	2.7794	1.99352	1.71838	2.54756	2.57243	1.79982	2.36765	1.90832	2.45595	2.36372	1.28027	1.47002	2.70136	1.4337	2.01355	2.72934	2.46135	1.55302	2.79774	2.58667	2.72737	2.43122	1.34681	2.9293	1.89412	1.82693	2.22448	1.50734	1.29098	2.47692	1.28163	1.18709	2.69428	1.19032	1.17009	3.19424	1.53631
Cell_0154	AMPKARt2	EAA 1.000000e-01 X + Insulin 10000 ng/ml	0.663595	0.719569	0.542288	0.533694	0.705493	0.741784	0.614473	0.54833	0.586696	0.393359	0.614399	0.453714	0.675489	0.581677	0.51033	0.494713	0.520604	0.592461	0.656347	0.649708	0.54848	0.600745	0.544558	0.616129	0.594631	0.549098	0.691559	0.671507	0.708807	0.690827	0.652742	0.607305	0.458494	0.608444	0.568313	0.512134	0.659951	0.60401	0.573797	0.669008	0.641539	0.502763	0.53367	0.731466	0.573063	0.599215	0.637877
Cell_0155	TFEB_TR	EAA 1.000000e-01 X + Insulin 10000 ng/ml	1.96835	0.683558	0.980645	1.15623	2.20921	0.664366	1.49195	1.64619	0.66818	1.54091	1.44176	0.847363	1.223	1.72204	2.34003	1.24807	1.94829	1.44107	3.87812	2.98409	1.0616	2.22792	1.39375	1.15145	1.60859	1.51047	1.66719	1.56192	1.28838	1.46586	1.50941	0.872518	1.64899	1.15994	1.03553	1.46152	1.30467	0.657178	1.03951	1.51283	0.632561	1.00707	1.46553	0.674713	1.39543	1.16185	0.510469
Cell_0155	FOXO_TR	EAA 1.000000e-01 X + Insulin 10000 ng/ml	2.71121	2.4278	1.83886	1.75738	2.79627	2.32777	2.46845	2.38727	1.33863	1.49045	2.64683	2.00487	1.68965	2.4902	2.50533	1.84716	2.31636	1.91846	2.33202	2.35188	1.27569	1.55025	2.6564	1.3854	2.8197	2.79162	2.55142	2.00938	2.72195	2.48391	2.75635	2.46496	1.41253	2.95318	1.77482	2.1028	2.24459	1.53953	1.30713	2.58287	1.28062	1.19448	2.73833	1.20536	1.14042	3.14849	1.58014
Cell_0155	AMPKARt2	EAA 1.000000e-01 X + Insulin 10000 ng/ml	0.666296	0.729862	0.537368	0.537341	0.701711	0.749468	0.6214	0.554466	0.568932	0.395105	0.606657	0.412177	0.687096	0.56838	0.523036	0.49467	0.499016	0.592028	0.652253	0.650871	0.541806	0.61679	0.527434	0.604075	0.619611	0.555174	0.673909	0.674727	0.702755	0.686177	0.640586	0.596669	0.474388	0.605036	0.693856	0.517212	0.665514	0.600877	0.564975	0.669593	0.65279	0.492738	0.515455	0.740089	0.578457	0.610821	0.645963
Cell_0156	TFEB_TR	EAA 1.000000e-01 X + Insulin 10000 ng/ml	1.54508	0.666123	0.980929	1.13636	1.79559	0.686234	1.5422	1.43994	0.690306	1.56369	1.19523	0.930795	1.30788	1.63261	1.99112	1.08146	1.90817	1.44111	3.93495	3.08756	1.16898	1.76842	1.32365	1.16922	1.68816	1.54836	1.48799	1.6611	1.37628	1.30736	1.41639	0.936896	1.73277	1.2463	1.01174	1.63974	1.33565	0.700015	1.06984	1.56768	0.609201	0.963345	1.40841	0.735614	1.33336	1.11692	0.537004
Cell_0156	FOXO_TR	EAA 1.000000e-01 X + Insulin 10000 ng/ml	2.74074	2.31192	1.83784	1.6931	2.69803	2.48037	2.48742	2.39668	1.35631	1.4917	2.49788	1.98763	1.69559	2.46621	2.34186	1.88832	2.27957	1.95502	2.53402	2.45887	1.32273	2.0792	2.68973	1.38512	3.22128	2.86029	2.53902	2.20872	2.80455	2.45062	2.85203	2.33866	1.42578	3.0219	1.82981	2.41089	2.25793	1.53694	1.32204	2.61689	1.24527	1.14176	2.6801	1.23296	1.17756	2.92417	1.59645
Cell_0156	AMPKARt2	EAA 1.000000e-01 X + Insulin 10000 ng/ml	0.663996	0.743341	0.531578	0.543522	0.690527	0.742443	0.61926	0.568496	0.565273	0.396186	0.624656	0.376052	0.688874	0.559328	0.543048	0.499579	0.501049	0.59408	0.65823	0.64543	0.541035	0.625225	0.534265	0.619755	0.635314	0.552935	0.676429	0.6665	0.711494	0.6812	0.612909	0.588179	0.474891	0.601195	0.69948	0.523299	0.664427	0.593508	0.566719	0.682589	0.672484	0.500254	0.515565	0.748734	0.579251	0.595551	0.640478
Cell_0157	TFEB_TR	EAA 1.000000e-01 X + Insulin 10000 ng/ml	0.840215	0.698199	1.00763	1.10324	1.82555	0.847352	1.77904	1.3828	0.711857	1.60231	1.18905	1.0147	1.248	1.79797	2.01193	0.975481	2.00114	1.61451	3.98339	3.81596	1.21038	1.34762	1.2409	1.32563	1.76056	1.57027	1.46732	1.76083	0.761003	1.31543	1.67462	0.913112	1.55952	1.33442	1.10661	1.8112	1.24003	0.71475	1.51686	1.60548	0.617699	0.963407	1.26526	0.705376	1.31593	1.07397	0.51227
Cell_0157	FOXO_TR	EAA 1.000000e-01 X + Insulin 10000 ng/ml	2.82418	2.44123	1.83243	1.65169	2.72975	2.65195	2.54751	2.36749	1.36501	1.46993	2.62203	1.98413	1.64526	2.47605	2.27224	1.99469	2.22958	1.98741	3.20194	2.40115	1.33944	2.57875	2.6322	1.35438	3.02173	2.84024	2.52824	2.2538	2.46764	2.48535	2.91471	2.34123	1.37823	3.09614	1.96009	2.42229	2.16748	1.544	1.27454	2.63803	1.23812	1.10847	2.73508	1.22518	1.27263	2.81944	1.61203
Cell_0157	AMPKARt2	EAA 1.000000e-01 X + Insulin 10000 ng/ml	0.664687	0.733635	0.507439	0.531377	0.692584	0.739248	0.618866	0.558296	0.57472	0.390905	0.627451	0.380081	0.679654	0.574457	0.533155	0.508766	0.504187	0.58686	0.679383	0.635518	0.543474	0.630426	0.541222	0.627872	0.622451	0.549471	0.684876	0.658869	0.614417	0.680761	0.612381	0.600785	0.470613	0.610884	0.701881	0.5065	0.650825	0.604549	0.577275	0.692896	0.665523	0.505862	0.533043	0.750247	0.575208	0.599843	0.63631
Cell_0158	TFEB_TR	EAA 1.000000e-01 X + Insulin 10000 ng/ml	1.11958	0.743073	1.03292	1.09351	2.38137	0.911808	1.6906	1.67591	0.706114	1.58473	1.49094	1.13278	1.0734	1.89956	2.3923	0.911518	1.62697	1.61951	4.03931	3.82738	1.21754	1.7092	1.50402	1.46084	1.51004	1.15102	1.64521	1.72899	0.801808	1.31394	1.80199	0.88407	1.50488	1.27011	1.02203	1.76434	1.13206	0.640877	1.35515	1.58459	0.614725	1.01666	1.25554	0.710045	1.46157	1.08317	0.480729
Cell_0158	FOXO_TR	EAA 1.000000e-01 X + Insulin 10000 ng/ml	2.84419	2.5345	1.85421	1.70595	2.79576	2.60057	2.6611	2.36439	1.33972	1.4162	3.03311	2.02055	1.71867	2.48601	2.36261	2.23463	2.51328	1.94166	3.62708	2.20171	1.33727	2.81214	2.52536	1.35019	2.71324	1.99885	2.58394	2.27286	2.40188	2.50662	2.84447	2.29414	1.37419	3.0909	2.04239	2.26187	2.05588	1.50827	1.19586	2.67537	1.23733	1.15429	2.85577	1.20274	1.33762	2.98664	1.55083
Cell_0158	AMPKARt2	EAA 1.000000e-01 X + Insulin 10000 ng/ml	0.67097	0.724428	0.48042	0.525502	0.704601	0.746072	0.622943	0.539755	0.577238	0.386117	0.597452	0.405187	0.682221	0.595399	0.51912	0.511145	0.502578	0.586533	0.680677	0.633295	0.54117	0.631831	0.537864	0.621219	0.609739	0.516786	0.680637	0.653217	0.634656	0.67953	0.622624	0.612975	0.476196	0.619873	0.702905	0.484289	0.653709	0.625367	0.587932	0.687818	0.653116	0.512221	0.525756	0.748294	0.571321	0.606507	0.645065
Cell_0159	TFEB_TR	EAA 1.000000e-01 X + Insulin 10000 ng/ml	1.60856	0.745847	1.08107	1.11296	2.71017	0.861787	1.32279	1.90592	0.685167	1.51605	1.54955	1.20738	1.17071	1.76684	2.60274	0.868333	1.13763	1.43456	3.34364	3.03672	1.2376	2.45726	0.811372	1.32252	1.35245	0.88263	1.75536	1.63089	0.787008	1.3226	1.44699	0.892265	1.51356	1.24854	0.932261	1.81041	1.12196	0.63171	0.895423	1.5559	0.610189	1.0388	1.45672	0.818487	1.39076	1.1189	0.486277
Cell_0159	FOXO_TR	EAA 1.000000e-01 X + Insulin 10000 ng/ml	2.76147	2.42228	1.84781	1.70064	2.73957	2.52665	2.60177	2.45009	1.30851	1.50704	3.25007	2.00381	2.14322	2.4975	2.37605	2.44474	2.81673	1.88189	3.63758	2.25058	1.33928	2.93722	1.22248	1.37027	2.60378	2.03638	2.62347	2.28633	2.46612	2.52411	2.8722	2.27762	1.42498	3.01354	2.04505	2.08586	1.99313	1.42771	1.18218	2.66518	1.21804	1.19478	2.83537	1.20088	1.32624	3.11801	1.4725
Cell_0159	AMPKARt2	EAA 1.000000e-01 X + Insulin 10000 ng/ml	0.676529	0.730183	0.47761	0.543167	0.70883	0.742652	0.629837	0.542084	0.579218	0.408048	0.597928	0.400562	0.701485	0.592429	0.526033	0.51431	0.505697	0.605652	0.665247	0.644308	0.540342	0.617528	0.550584	0.618991	0.616062	0.530877	0.683704	0.646978	0.638303	0.671898	0.61791	0.622123	0.478831	0.615381	0.704142	0.480051	0.666794	0.622273	0.584944	0.683982	0.666992	0.520008	0.505484	0.74406	0.587161	0.599983	0.640922
Cell_0160	TFEB_TR	EAA 1.000000e-01 X + Insulin 10000 ng/ml	1.4724	0.716442	1.19989	1.13254	2.45824	1.00746	1.33222	1.68751	0.678284	1.4882	1.4148	1.19546	1.29502	1.66118	2.82263	0.923548	1.90166	1.46082	2.87786	1.37966	1.24988	2.46814	0.840024	1.13561	1.54608	0.829665	1.67139	1.66519	0.821774	1.42243	1.33117	0.969886	1.53021	1.28784	0.974835	1.93099	1.09577	0.672017	1.11819	1.60086	0.614012	1.02876	1.51212	0.836982	1.23231	1.0851	0.493369
Cell_0160	FOXO_TR	EAA 1.000000e-01 X + Insulin 10000 ng/ml	2.65532	2.31069	1.7954	1.67951	2.77723	2.55865	2.49483	2.52792	1.31965	1.74038	3.03298	1.89572	2.57736	2.45175	2.26155	2.49512	2.46636	1.86442	3.6891	2.63217	1.3327	2.89421	1.30348	1.34824	2.73855	2.03663	2.62522	2.28135	2.52906	2.60371	3.01324	2.33727	1.43225	2.96202	2.09235	1.86629	1.95692	1.45316	1.2148	2.63652	1.18864	1.20542	2.78312	1.19368	1.30578	3.08386	1.51186
Cell_0160	AMPKARt2	EAA 1.000000e-01 X + Insulin 10000 ng/ml	0.67159	0.739529	0.484171	0.556233	0.708714	0.73612	0.647741	0.550621	0.576976	0.439728	0.626861	0.371313	0.710635	0.573974	0.537598	0.508419	0.509878	0.616276	0.663478	0.746817	0.540779	0.59964	0.555358	0.620373	0.610316	0.518482	0.69107	0.643441	0.645615	0.672102	0.611306	0.623062	0.471712	0.613024	0.706818	0.483424	0.660715	0.607522	0.554598	0.685827	0.673465	0.511288	0.50837	0.74145	0.591752	0.598385	0.624071
Cell_0161	TFEB_TR	EAA 1.000000e-01 X + Insulin 10000 ng/ml	1.24736	0.705678	1.30106	1.14532	2.1035	1.27697	1.72891	1.4627	0.683208	1.55867	1.39153	1.18738	1.15276	1.61535	3.14889	1.05079	0.989208	1.6991	3.28235	1.39808	1.26635	2.41802	0.832644	1.36676	1.5908	0.937858	1.59363	1.69152	0.813225	1.59396	2.142	1.0953	1.68334	1.19527	0.849282	1.82748	1.0788	0.618872	1.59836	1.72859	0.610232	1.03422	1.40681	0.618965	1.2874	1.02931	0.477634
Cell_0161	FOXO_TR	EAA 1.000000e-01 X + Insulin 10000 ng/ml	2.54934	2.28295	1.76386	1.91846	2.86954	2.50882	2.66617	2.54132	1.32674	1.90217	2.80058	1.83469	2.75036	2.31584	2.2369	2.45319	1.57208	1.86814	3.71681	2.59083	1.34376	2.83971	1.28403	1.32446	2.94265	2.04733	2.5477	2.23276	2.48128	2.74544	3.05927	2.36211	1.39174	3.03878	2.13404	1.70394	1.91139	1.5521	1.21406	2.65466	1.16521	1.22233	2.82409	1.1625	1.3267	3.03102	1.49954
Cell_0161	AMPKARt2	EAA 1.000000e-01 X + Insulin 10000 ng/ml	0.66034	0.743582	0.482902	0.562524	0.706929	0.743414	0.665861	0.542269	0.567421	0.449863	0.621827	0.360434	0.701863	0.575954	0.537192	0.49189	0.542167	0.604282	0.665718	0.741436	0.541079	0.597866	0.545483	0.62152	0.589574	0.507432	0.687933	0.642485	0.65648	0.685704	0.615662	0.61318	0.470732	0.617199	0.710054	0.485749	0.650456	0.608688	0.529353	0.682551	0.656986	0.510523	0.512368	0.746159	0.561393	0.59233	0.627436
Cell_0162	TFEB_TR	EAA 1.000000e-01 X + Insulin 10000 ng/ml	1.31103	0.724738	1.38303	1.17963	2.32247	1.29042	1.79004	1.52534	0.682044	1.60492	1.23226	1.22075	1.13408	0.953427	2.77636	1.19829	1.08425	1.79292	3.63621	1.50704	1.30515	2.89393	0.838246	1.60519	1.39923	1.07691	1.64038	1.57097	0.774532	1.6848	2.53794	1.15805	1.75448	1.06705	0.792379	1.6978	1.14034	0.59654	1.56925	1.81932	0.610652	1.03377	1.48385	0.45063	1.35173	1.04334	0.47337
Cell_0162	FOXO_TR	EAA 1.000000e-01 X + Insulin 10000 ng/ml	2.65697	2.26807	1.77928	2.26704	2.81698	2.41307	2.88888	2.56535	1.27891	1.92925	2.80964	1.87335	2.9239	1.50103	2.33578	2.42416	1.55625	1.88412	3.61753	2.50721	1.37211	2.99781	1.26122	1.31889	2.86201	2.02534	2.40996	2.19463	2.42043	2.82698	3.04444	2.31265	1.38651	3.0834	2.07125	1.6433	1.93769	1.55341	1.16624	2.72357	1.1664	1.2308	2.93183	1.1451	1.34063	3.02999	1.44151
Cell_0162	AMPKARt2	EAA 1.000000e-01 X + Insulin 10000 ng/ml	0.663111	0.729275	0.481673	0.582787	0.708715	0.748994	0.666509	0.530067	0.568526	0.451172	0.612052	0.363211	0.694775	0.475317	0.529416	0.499228	0.551978	0.60097	0.663232	0.750299	0.544373	0.596306	0.52748	0.629238	0.593723	0.512292	0.69025	0.642564	0.657292	0.690398	0.619679	0.605987	0.47734	0.616557	0.706507	0.496658	0.659426	0.615029	0.541836	0.678656	0.660569	0.53547	0.501598	0.754301	0.548539	0.584881	0.637196
Cell_0163	TFEB_TR	EAA 1.000000e-01 X + Insulin 10000 ng/ml	1.43451	0.716575	1.48246	1.23188	2.90483	1.0691	1.51887	1.50114	0.681039	1.55052	2.54089	1.23106	1.36385	0.914127	2.14687	1.12955	1.07716	1.75359	3.69531	1.46429	1.31872	2.82888	0.891024	1.36826	1.29084	1.07431	1.69414	1.48059	0.853396	1.47809	1.68913	1.08565	1.51162	1.06235	1.0064	1.71561	1.12696	0.679585	1.42416	1.80149	0.608575	1.04637	1.59679	0.596296	1.31101	1.03703	0.495569
Cell_0163	FOXO_TR	EAA 1.000000e-01 X + Insulin 10000 ng/ml	3.13479	2.27232	1.78953	2.34905	2.80561	2.44397	2.89048	2.58424	1.23862	1.90372	1.44633	1.88493	3.08166	1.46066	2.39788	2.44029	1.56499	1.89333	3.59031	2.44069	1.37813	3.13267	1.32594	1.30123	2.57121	1.94859	2.37833	2.18699	2.38117	2.7714	3.07842	2.31621	1.3926	2.92417	2.00959	1.57623	2.01836	1.5111	1.11852	2.82601	1.19557	1.24367	3.0822	1.15085	1.29975	3.0167	1.62336
Cell_0163	AMPKARt2	EAA 1.000000e-01 X + Insulin 10000 ng/ml	0.675347	0.713128	0.485889	0.59081	0.723563	0.736819	0.658753	0.531029	0.577931	0.446726	0.678698	0.360535	0.697421	0.473589	0.526693	0.521697	0.558148	0.618954	0.668588	0.750875	0.544521	0.5863	0.541121	0.633551	0.613835	0.511257	0.700918	0.640113	0.660214	0.681824	0.61713	0.610105	0.4754	0.618337	0.695483	0.516005	0.676908	0.616796	0.562407	0.678713	0.677735	0.546673	0.505264	0.753847	0.570114	0.596069	0.624621
Cell_0164	TFEB_TR	EAA 1.000000e-01 X + Insulin 10000 ng/ml	1.38614	0.68958	1.49927	1.25988	2.97863	0.963589	1.36057	0.854251	0.696506	1.50467	1.48149	1.18339	1.37427	1.02472	2.12979	0.872993	0.958478	1.78245	3.55699	1.33705	1.2761	2.35795	0.904164	1.1267	1.23909	0.947063	1.65082	1.49941	0.87156	1.30152	1.2455	0.996479	1.38259	1.14002	1.03352	1.70517	1.03862	0.691086	1.52879	1.73735	0.600553	1.09367	1.54161	0.765172	1.21033	0.958197	0.514012
Cell_0164	FOXO_TR	EAA 1.000000e-01 X + Insulin 10000 ng/ml	3.45404	2.29208	1.75159	2.25997	2.84734	2.51607	2.90218	1.18577	1.26875	1.8802	1.48429	1.8344	3.02413	1.44038	2.31559	2.43884	1.56391	1.88737	3.50136	2.41638	1.38129	3.13668	1.33512	1.28758	2.48024	1.95411	2.44118	2.15344	2.32274	2.70736	3.08916	2.41642	1.37371	2.79204	1.99853	1.57043	1.98239	1.54761	1.13435	2.89618	1.23217	1.23139	3.11154	1.15973	1.23785	2.95952	1.84294
Cell_0164	AMPKARt2	EAA 1.000000e-01 X + Insulin 10000 ng/ml	0.673786	0.725351	0.495823	0.570391	0.72863	0.72479	0.654052	0.61623	0.57955	0.427966	0.676246	0.367028	0.701435	0.488896	0.531334	0.520057	0.567893	0.630257	0.675199	0.740443	0.54212	0.590195	0.550448	0.620548	0.612911	0.512329	0.7052	0.635068	0.662321	0.680078	0.617755	0.607533	0.46601	0.624712	0.690065	0.530977	0.679933	0.621237	0.56431	0.676712	0.669921	0.541786	0.516592	0.741456	0.575219	0.607257	0.622085
Cell_0165	TFEB_TR	EAA 1.000000e-01 X + Insulin 10000 ng/ml	1.21228	0.684634	1.50621	1.25406	0.747831	1.15866	1.18336	0.767997	0.716366	1.47691	1.38803	1.11767	1.14458	1.09161	2.19471	0.964792	0.946528	1.82525	2.96627	1.39426	1.23734	2.35434	0.841072	1.16856	1.21192	0.974363	1.57833	1.51388	0.767384	1.41451	1.77397	0.999273	1.60037	1.26645	0.89558	1.65169	1.01446	0.66229	1.46623	1.72904	0.62638	1.11186	1.568	0.698486	1.11444	0.935378	0.50536
Cell_0165	FOXO_TR	EAA 1.000000e-01 X + Insulin 10000 ng/ml	3.26183	2.27355	1.69146	2.23644	1.51825	2.49716	3.0126	1.20289	1.31478	1.85293	1.5238	1.80017	2.95995	1.41079	2.1435	2.37225	1.5366	1.88114	3.29171	2.44108	1.39993	3.11211	1.23002	1.2883	2.57171	2.07087	2.48005	2.104	2.33567	2.74257	3.04194	2.51365	1.41579	2.9085	1.97662	1.67707	1.87186	1.60171	1.18577	2.86163	1.23879	1.19989	3.0154	1.18755	1.23825	2.97753	1.80779
Cell_0165	AMPKARt2	EAA 1.000000e-01 X + Insulin 10000 ng/ml	0.669498	0.743279	0.50057	0.561664	0.615719	0.728477	0.652257	0.622174	0.575823	0.422657	0.686446	0.370898	0.699434	0.524409	0.524775	0.514614	0.576426	0.623108	0.672483	0.743737	0.546562	0.604708	0.505013	0.607189	0.604011	0.533174	0.704982	0.641746	0.64943	0.6907	0.623415	0.596679	0.461427	0.623545	0.694355	0.538477	0.667283	0.621578	0.569881	0.676924	0.654548	0.550586	0.507078	0.732451	0.562192	0.604847	0.640867
Cell_0166	TFEB_TR	EAA 1.000000e-01 X + Insulin 10000 ng/ml	1.1551	1.58915	1.55982	1.25676	0.731901	1.35392	1.09681	0.618709	0.725014	1.4104	1.4962	1.10285	1.07142	0.941382	2.12237	1.28275	1.04848	1.80606	2.40512	1.53545	1.26901	2.30393	0.831364	1.18824	1.29054	1.1006	1.62385	1.48012	0.753388	1.35207	2.0202	1.05072	1.69871	1.34382	0.995331	1.58182	0.979949	0.716909	1.14842	1.80765	0.65908	1.12381	1.60485	0.640171	1.18748	0.965869	0.483359
Cell_0166	FOXO_TR	EAA 1.000000e-01 X + Insulin 10000 ng/ml	3.09153	1.15976	1.66545	2.2636	1.51889	2.4432	3.05841	1.18521	1.32647	1.80101	1.52847	1.82894	2.94493	1.38187	2.07935	2.27546	1.52302	1.84188	3.22597	2.48234	1.40364	3.01664	1.21607	1.31434	2.63209	2.12871	2.51423	2.06384	2.40462	2.80557	3.03045	2.56032	1.50659	3.09437	1.98116	1.69974	1.82531	1.63334	1.2087	2.85101	1.19035	1.27674	3.05512	1.21305	1.23986	3.06432	1.76219
Cell_0166	AMPKARt2	EAA 1.000000e-01 X + Insulin 10000 ng/ml	0.675291	0.406235	0.489739	0.572401	0.632915	0.732632	0.656839	0.622986	0.572058	0.439178	0.690337	0.358001	0.693819	0.538864	0.502044	0.522631	0.577798	0.612333	0.667073	0.754755	0.550049	0.609095	0.47616	0.61102	0.611617	0.547237	0.702893	0.658251	0.64792	0.700731	0.625701	0.596633	0.460381	0.623383	0.69303	0.543964	0.660776	0.610717	0.587758	0.683995	0.648554	0.556738	0.500695	0.732631	0.564132	0.601497	0.634319
Cell_0167	TFEB_TR	EAA 1.000000e-01 X + Insulin 10000 ng/ml	1.26642	1.59958	1.43195	1.29458	0.727236	1.21685	1.34735	0.681637	0.732923	1.39576	1.30591	1.1244	1.07184	0.805112	2.2239	1.15075	1.04206	1.75803	2.53185	1.62659	1.33404	2.00047	0.90861	1.15307	1.34417	1.03727	1.7448	1.46717	0.783724	1.12718	1.80085	1.08024	1.63529	1.24567	1.11922	1.55293	0.945395	0.724581	1.11343	1.84126	0.642347	1.18408	1.4373	0.7667	1.25046	0.932058	0.47615
Cell_0167	FOXO_TR	EAA 1.000000e-01 X + Insulin 10000 ng/ml	3.21133	1.18116	1.66829	2.33878	1.54394	2.48029	3.10017	1.17445	1.31939	1.80206	1.49838	1.91281	2.78271	1.3725	2.15137	2.23349	1.54987	1.78876	3.26861	2.49063	1.39864	2.95993	1.31397	1.35005	2.6793	2.0663	2.50539	2.07562	2.36426	2.82694	3.0623	2.61941	1.54252	3.1796	2.02106	1.64712	1.80229	1.72144	1.22452	3.02184	1.14742	1.30621	3.1167	1.19482	1.12001	3.04961	1.80861
Cell_0167	AMPKARt2	EAA 1.000000e-01 X + Insulin 10000 ng/ml	0.673585	0.453985	0.485665	0.570493	0.642175	0.729617	0.657357	0.619366	0.5668	0.447581	0.682299	0.362808	0.692672	0.521393	0.499919	0.512197	0.580928	0.60508	0.663701	0.753325	0.545626	0.607725	0.502002	0.616798	0.622528	0.534505	0.700179	0.655411	0.672811	0.698508	0.625289	0.59468	0.457711	0.63092	0.680054	0.539492	0.664136	0.599413	0.590818	0.686037	0.639159	0.549104	0.513443	0.730833	0.573076	0.594571	0.616518
Cell_0168	TFEB_TR	EAA 1.000000e-01 X + Insulin 10000 ng/ml	1.34	1.61486	1.22865	1.32215	0.750127	1.10126	1.48423	0.815913	0.7394	1.44526	1.07683	1.08416	0.965442	0.889218	2.12097	0.836684	0.997155	1.70363	2.955	1.62966	1.35103	1.98711	0.935296	1.20515	1.2662	0.931128	1.74978	1.50507	0.77533	1.22561	1.51112	1.1039	1.69679	1.13948	1.04974	1.70283	1.02552	0.658132	1.43477	1.75154	0.628242	1.20256	1.38126	0.902069	1.1559	0.892902	0.483565
Cell_0168	FOXO_TR	EAA 1.000000e-01 X + Insulin 10000 ng/ml	3.22122	1.18684	1.63197	2.42643	1.57924	2.60687	3.1695	1.18054	1.2913	1.88834	1.47744	1.93116	2.63439	1.36075	2.14994	2.31478	1.59279	1.81346	3.27533	2.57748	1.38712	3.02669	1.31935	1.33407	2.64965	2.02669	2.44018	2.1624	2.31631	2.80187	3.07977	2.74077	1.58673	3.18499	2.03342	1.70687	1.81141	1.85039	1.18688	3.19871	1.17853	1.19866	2.99615	1.18858	1.21904	3.03786	1.79485
Cell_0168	AMPKARt2	EAA 1.000000e-01 X + Insulin 10000 ng/ml	0.675222	0.447759	0.499492	0.567679	0.648816	0.73226	0.643306	0.621945	0.562203	0.448864	0.684065	0.378729	0.695074	0.508878	0.528605	0.499097	0.58572	0.600307	0.663482	0.747467	0.545947	0.606502	0.521763	0.613803	0.615234	0.517628	0.706013	0.63706	0.68083	0.688527	0.624396	0.577823	0.459813	0.629013	0.669277	0.522954	0.664555	0.599291	0.573298	0.678458	0.638257	0.542753	0.514425	0.729346	0.575054	0.58769	0.631294
Cell_0169	TFEB_TR	EAA 1.000000e-01 X + Insulin 10000 ng/ml	1.28441	1.6192	1.26636	1.28485	0.763169	1.23465	1.42603	0.812565	0.725584	1.44182	1.23423	0.993683	1.04228	0.996666	1.97657	0.955629	1.01645	1.68189	3.04224	1.52998	1.31791	2.11061	0.904924	1.27113	1.22311	1.08859	1.69572	1.50074	0.818831	1.36155	1.22529	1.26877	1.55584	1.18663	1.10735	1.75229	1.09156	0.683986	1.44599	1.68914	0.653092	1.18117	1.51036	0.929474	1.22391	0.913721	0.494133
Cell_0169	FOXO_TR	EAA 1.000000e-01 X + Insulin 10000 ng/ml	3.03863	1.1877	1.53823	2.37236	1.6058	2.65161	3.13677	1.2051	1.27091	1.92592	1.48578	1.84492	2.69177	1.35446	2.08599	2.37316	1.62491	1.85927	3.30579	2.76863	1.33679	3.0467	1.25492	1.30813	2.52137	2.07691	2.47029	2.19951	2.417	2.78666	3.11122	2.82842	1.67482	3.09209	2.00375	1.73696	1.87943	1.91155	1.13251	3.2191	1.21049	1.54143	2.96616	1.2208	1.95341	3.12288	1.82405
Cell_0169	AMPKARt2	EAA 1.000000e-01 X + Insulin 10000 ng/ml	0.695784	0.457754	0.50507	0.58466	0.652647	0.73749	0.638396	0.630717	0.563884	0.460495	0.697537	0.373533	0.694814	0.503869	0.535331	0.516117	0.584533	0.600304	0.66963	0.750037	0.555499	0.604232	0.524253	0.612427	0.597924	0.51128	0.713114	0.636414	0.65744	0.686426	0.619734	0.573337	0.471775	0.620906	0.664643	0.519164	0.664412	0.607617	0.564324	0.672298	0.651912	0.541468	0.509038	0.732797	0.578573	0.593565	0.642928
Cell_0170	TFEB_TR	EAA 1.000000e-01 X + Insulin 10000 ng/ml	1.19758	1.61406	1.34427	1.22369	0.765554	1.15134	1.54247	0.873315	0.698941	1.41981	1.93161	0.961322	1.30668	0.971546	2.54864	1.1538	0.986056	1.66197	2.96569	1.60776	1.28174	2.09709	0.9261	1.23079	1.34312	1.32961	1.80379	1.46245	0.854385	1.20639	1.28719	1.52189	1.26139	1.20686	1.35208	1.53308	1.08276	0.76148	1.05918	1.72915	0.668239	1.26374	1.51558	0.948291	1.3976	0.919751	0.517649
Cell_0170	FOXO_TR	EAA 1.000000e-01 X + Insulin 10000 ng/ml	2.94349	1.20343	1.46348	2.22358	1.61617	2.5801	3.10446	1.26227	1.30057	1.93891	1.51386	1.84959	2.76316	1.35938	2.1524	2.25009	1.65337	1.82071	3.33035	2.86278	1.28559	3.01888	1.27699	1.31116	2.52058	2.1186	2.61452	2.17136	2.466	2.84917	3.13479	2.73454	1.6609	2.98967	1.92308	1.71442	1.88337	1.86522	1.37557	3.23515	1.18764	2.46051	3.14988	1.21335	2.80831	3.05562	1.90899
Cell_0170	AMPKARt2	EAA 1.000000e-01 X + Insulin 10000 ng/ml	0.698127	0.497488	0.499635	0.596968	0.641355	0.733714	0.647306	0.62498	0.571664	0.465901	0.704339	0.376983	0.693221	0.500984	0.503443	0.530308	0.586657	0.605639	0.675474	0.756487	0.562355	0.606244	0.522623	0.610038	0.597088	0.50433	0.705728	0.640422	0.644457	0.69597	0.616218	0.589447	0.476981	0.624666	0.661412	0.530213	0.662699	0.610837	0.576944	0.672541	0.65384	0.553507	0.519185	0.734274	0.589808	0.60164	0.629299
Cell_0171	TFEB_TR	EAA 1.000000e-01 X + Insulin 10000 ng/ml	1.10322	1.62177	1.29921	1.20961	0.806461	0.972819	1.57801	0.909137	0.683654	1.44326	2.26152	0.976414	1.31471	0.928569	3.13576	1.00503	0.934451	1.60209	2.94548	1.80238	1.25742	2.10827	0.971257	1.18109	1.44216	1.25898	1.96211	1.53429	0.830491	1.16278	1.58399	1.54119	1.58959	1.143	1.39192	1.50748	1.10894	0.753265	0.966999	1.74087	0.676767	1.40012	1.50519	0.982914	1.41278	0.914178	0.537337
Cell_0171	FOXO_TR	EAA 1.000000e-01 X + Insulin 10000 ng/ml	2.99953	1.22502	1.46312	2.17944	1.62159	2.58113	3.20755	1.28858	1.3258	2.04484	1.54612	1.95127	2.6943	1.33771	2.23674	2.17528	1.66163	1.7792	3.30258	2.83367	1.27862	3.09982	1.35718	1.27113	2.62911	2.11995	2.7562	2.22173	2.31728	2.86132	3.08043	2.54028	1.58418	3.05864	1.85403	2.0081	1.81577	1.7347	1.86925	3.24284	1.18933	3.08673	3.24789	1.17164	3.03585	2.87401	1.88115
Cell_0171	AMPKARt2	EAA 1.000000e-01 X + Insulin 10000 ng/ml	0.677405	0.495793	0.495735	0.59441	0.62487	0.728191	0.63845	0.609272	0.576357	0.451445	0.698901	0.397913	0.691088	0.511832	0.490787	0.528873	0.597147	0.610898	0.672305	0.755808	0.559564	0.608562	0.514437	0.601773	0.607649	0.49347	0.695493	0.623547	0.649885	0.700886	0.614244	0.598179	0.46481	0.626682	0.663669	0.536177	0.65679	0.602929	0.586034	0.675824	0.645523	0.571098	0.515355	0.732419	0.598414	0.607176	0.632631
Cell_0172	TFEB_TR	EAA 1.000000e-01 X + Insulin 10000 ng/ml	1.00226	1.62332	1.3518	1.20786	0.832761	1.20244	1.40935	0.774301	0.687786	1.41891	1.8504	0.965953	1.141	0.89257	2.69265	0.904684	0.924071	1.58833	2.84902	1.58793	1.23935	2.15747	0.995587	1.28488	1.41348	1.03292	1.88388	1.6577	0.882712	1.32034	1.63454	1.43382	2.14433	1.19966	1.24437	1.67898	1.10549	0.704116	1.12782	1.63113	0.692445	1.42725	1.58041	0.960986	1.46843	2.03176	0.514541
Cell_0172	FOXO_TR	EAA 1.000000e-01 X + Insulin 10000 ng/ml	3.09418	1.23173	1.48421	2.22462	1.63253	2.66876	3.23657	1.27271	1.31574	2.08136	1.57703	1.98073	2.62048	1.30183	2.13282	2.30396	1.61287	1.79508	3.2872	2.80817	1.28426	3.2357	1.41245	1.23051	2.66025	2.13669	2.78321	2.28091	2.15475	2.74345	3.03188	2.45596	1.71187	3.19681	1.87962	2.48122	1.77044	1.59292	2.09932	3.11101	1.20635	3.13373	3.10019	1.16885	2.87434	1.16304	1.80418
Cell_0172	AMPKARt2	EAA 1.000000e-01 X + Insulin 10000 ng/ml	0.681581	0.472796	0.485409	0.59476	0.630205	0.730244	0.62467	0.612035	0.572654	0.43991	0.691599	0.402406	0.685707	0.518463	0.519099	0.534246	0.596096	0.609475	0.668903	0.746719	0.55601	0.602522	0.516094	0.603577	0.601058	0.483209	0.698892	0.614073	0.650159	0.690218	0.607391	0.594259	0.467394	0.613503	0.661048	0.551782	0.658741	0.595881	0.578011	0.675181	0.650358	0.563581	0.495791	0.726223	0.594102	0.564794	0.646947
Cell_0173	TFEB_TR	EAA 1.000000e-01 X + Insulin 10000 ng/ml	0.999104	1.58916	1.3974	1.16865	0.809187	1.39449	1.34924	0.774545	0.707596	1.33758	1.39965	0.95837	1.18815	0.857195	2.13733	1.10482	0.918563	1.57645	2.87937	1.35099	1.22136	2.07645	1.06313	1.34539	1.40193	1.05644	1.67788	1.66735	1.02528	1.30875	1.54841	1.57662	1.86749	1.31943	1.27196	1.57888	1.05347	0.679506	1.13811	1.49416	0.682275	1.37576	0.682909	0.984994	1.51993	1.89602	0.471997
Cell_0173	FOXO_TR	EAA 1.000000e-01 X + Insulin 10000 ng/ml	3.09921	1.22208	1.48411	2.21517	1.64188	2.71955	3.09192	1.31761	1.34147	1.96023	1.61101	2.03363	2.66457	1.29977	1.99274	2.36069	1.56421	1.81473	3.30947	2.78169	1.30199	3.21791	1.43939	1.23056	2.70989	2.14246	2.59709	2.21255	2.08994	2.76657	3.04031	2.43845	2.11571	3.21682	1.87015	2.60226	1.7431	1.52404	2.01769	2.99118	1.17352	3.11273	1.23142	1.18189	2.83259	1.17424	1.78328
Cell_0173	AMPKARt2	EAA 1.000000e-01 X + Insulin 10000 ng/ml	0.699865	0.479971	0.479809	0.592888	0.644557	0.735616	0.639076	0.622163	0.568868	0.445897	0.694774	0.391757	0.679676	0.510629	0.533244	0.534047	0.580149	0.603377	0.672818	0.744816	0.562113	0.58933	0.509404	0.615307	0.585269	0.471042	0.704219	0.626393	0.644055	0.685442	0.607824	0.591231	0.503784	0.606944	0.642135	0.571252	0.665842	0.605465	0.582163	0.666052	0.651606	0.537934	0.524352	0.71589	0.592725	0.562865	0.644205
Cell_0174	TFEB_TR	EAA 1.000000e-01 X + Insulin 10000 ng/ml	1.07062	1.56021	1.24555	1.15184	0.834805	1.24821	1.36381	0.9111	0.722968	1.3293	0.90266	0.980374	1.32397	0.997778	2.38902	1.20253	1.02037	1.51305	3.00044	1.78642	1.21161	1.97064	1.1611	1.23473	1.34809	1.11481	1.63547	1.60878	1.14264	1.30402	1.64151	1.8072	1.35519	1.30531	1.38274	1.42324	1.09019	0.661807	1.3035	0.882575	0.656124	1.36379	0.68953	1.06452	1.34982	1.91185	0.461274
Cell_0174	FOXO_TR	EAA 1.000000e-01 X + Insulin 10000 ng/ml	2.96969	1.20269	1.50214	2.18373	1.65929	2.7511	3.06815	1.3955	1.41819	1.91291	1.63368	2.11017	2.73329	1.31767	2.08294	2.29129	1.58264	1.87508	3.36251	2.745	1.34047	3.10709	1.4212	1.19344	2.81967	2.08385	2.40797	2.13201	2.04419	3.0323	3.02425	2.38517	2.56797	3.17702	1.74488	2.48827	1.78127	1.49499	1.99682	1.81817	1.16138	3.17526	1.27255	1.16486	2.84352	1.16935	1.77787
Cell_0174	AMPKARt2	EAA 1.000000e-01 X + Insulin 10000 ng/ml	0.691918	0.488292	0.494343	0.585353	0.640471	0.738235	0.658561	0.616607	0.572364	0.451326	0.702831	0.37744	0.678859	0.513551	0.511847	0.532444	0.574401	0.599484	0.673355	0.754863	0.565853	0.576345	0.482302	0.613393	0.59183	0.467379	0.704868	0.624537	0.633877	0.705464	0.619654	0.589576	0.535565	0.623374	0.63063	0.54864	0.668942	0.623822	0.600206	0.492397	0.634322	0.529281	0.520449	0.712684	0.600328	0.574332	0.650715
Cell_0175	TFEB_TR	EAA 1.000000e-01 X + Insulin 10000 ng/ml	1.07915	1.5729	1.12128	1.19383	0.890104	1.29337	1.45647	0.865463	0.722643	1.3941	0.672832	0.987831	1.30684	1.28753	2.61244	1.07597	1.23781	1.6135	2.81272	2.24268	1.24418	2.10338	1.21475	1.23261	1.23653	1.07199	1.7106	1.57604	1.1823	1.48273	1.93347	1.78283	1.47491	1.28238	1.41724	1.54572	0.709156	0.654641	1.58056	0.842363	0.642357	1.37576	0.706106	0.978628	1.22682	2.0723	0.476204
Cell_0175	FOXO_TR	EAA 1.000000e-01 X + Insulin 10000 ng/ml	2.84589	1.19351	1.51855	2.22888	1.66874	2.74697	3.22489	1.38589	1.44782	1.98683	1.62774	2.01261	2.7393	1.32824	2.3007	2.33441	1.59636	1.95195	3.39518	2.7356	1.38331	3.22612	1.34837	1.31159	2.84998	1.97404	2.5216	2.15435	2.01007	3.23136	3.02494	2.4319	2.77188	3.15416	1.69503	2.51802	1.31386	1.46052	2.06336	1.77624	1.19068	3.24469	1.30239	1.14582	2.80542	1.15507	1.76712
Cell_0175	AMPKARt2	EAA 1.000000e-01 X + Insulin 10000 ng/ml	0.678714	0.486145	0.506006	0.588615	0.636732	0.73634	0.656651	0.604871	0.573912	0.445848	0.705291	0.375804	0.686276	0.533695	0.502832	0.541898	0.58	0.595918	0.669391	0.758954	0.558853	0.57773	0.4709	0.606375	0.617479	0.48	0.713744	0.60754	0.624508	0.723097	0.622652	0.589932	0.535262	0.641889	0.640948	0.511774	0.692203	0.620128	0.59202	0.48516	0.63415	0.544158	0.52001	0.718442	0.595789	0.571029	0.668279
Cell_0176	TFEB_TR	EAA 1.000000e-01 X + Insulin 10000 ng/ml	1.00603	1.5779	1.16254	1.21507	0.868657	1.4094	1.65038	0.766039	0.738847	1.42697	1.32046	0.998131	1.30019	1.4235	2.31604	1.06557	1.41381	1.79079	2.72563	2.08201	1.3045	2.27086	1.25677	1.24673	1.31214	1.41149	1.76048	1.55527	1.10536	1.39088	2.06252	1.59361	1.5605	0.582706	1.55155	1.66758	0.718066	0.664492	1.57841	0.879897	0.652632	1.34364	0.708692	0.850577	1.29467	2.06136	0.475629
Cell_0176	FOXO_TR	EAA 1.000000e-01 X + Insulin 10000 ng/ml	2.84687	1.22053	1.47827	2.26482	1.63418	2.67828	3.26064	1.34562	1.40012	1.9944	1.61222	1.91145	2.73515	1.34625	2.2559	2.41752	1.56325	1.89671	3.37006	2.73455	1.50899	3.44462	1.28181	1.79424	2.82617	1.84328	2.71591	2.19462	2.03694	3.20954	3.05466	2.56455	2.68388	1.30501	1.74931	2.58369	1.36992	1.49065	2.05752	1.70354	1.18405	3.3141	1.29981	1.15376	2.82784	1.14575	1.7449
Cell_0176	AMPKARt2	EAA 1.000000e-01 X + Insulin 10000 ng/ml	0.682614	0.4991	0.500827	0.59544	0.645376	0.732552	0.650142	0.595583	0.567888	0.439692	0.711012	0.401766	0.692744	0.550392	0.511237	0.532003	0.582173	0.593767	0.671312	0.754869	0.566126	0.591178	0.463891	0.620731	0.625882	0.475439	0.722585	0.610559	0.62481	0.717861	0.620097	0.592087	0.516742	0.711234	0.654951	0.521053	0.678996	0.594056	0.576075	0.512093	0.652361	0.558516	0.526501	0.718961	0.593831	0.562183	0.664369
Cell_0177	TFEB_TR	EAA 1.000000e-01 X + Insulin 10000 ng/ml	1.00346	1.55017	1.27201	1.17849	0.859626	1.20752	1.56729	0.831754	0.765205	1.42336	1.80461	1.04362	1.30544	1.39651	2.02266	1.17263	1.56912	1.70723	3.05393	1.92458	1.32707	2.21925	1.31502	1.01822	1.41257	1.79649	1.80903	1.55796	1.01404	1.29927	1.37011	1.55383	1.28617	0.499542	1.59061	1.63313	0.719711	0.666972	1.55945	0.95032	0.693177	1.32803	0.699021	0.930499	1.37313	1.76634	0.459708
Cell_0177	FOXO_TR	EAA 1.000000e-01 X + Insulin 10000 ng/ml	2.91614	1.25805	1.43001	2.20454	1.62385	2.6635	3.16941	1.36694	1.41811	1.9254	1.59844	1.94539	2.7022	1.38253	1.97987	2.41393	1.55675	1.79942	3.36473	2.69186	1.73486	3.36204	1.26103	2.24466	2.78246	1.73152	2.67574	2.18644	2.0891	3.11877	1.61215	2.58071	2.6482	1.3264	1.7204	2.54532	1.37826	1.57202	2.00996	1.69961	1.17256	3.28758	1.29311	1.16623	2.86341	1.1543	1.74209
Cell_0177	AMPKARt2	EAA 1.000000e-01 X + Insulin 10000 ng/ml	0.686214	0.505678	0.495988	0.589708	0.643726	0.734112	0.654198	0.59787	0.566026	0.436837	0.716123	0.416156	0.686128	0.547159	0.501576	0.517864	0.587975	0.607717	0.671025	0.75433	0.592235	0.593295	0.449236	0.636353	0.611141	0.439876	0.713599	0.627383	0.62075	0.715625	0.562198	0.590413	0.500825	0.700352	0.664395	0.541486	0.707523	0.587435	0.585552	0.535379	0.643552	0.558188	0.537667	0.709301	0.609036	0.572356	0.651745
Cell_0178	TFEB_TR	EAA 1.000000e-01 X + Insulin 10000 ng/ml	1.30665	1.55194	1.32379	1.16191	0.942043	1.12535	1.30357	0.922868	0.745065	1.42536	1.73379	1.04775	1.10792	1.49278	1.94989	1.24166	1.65472	1.62794	3.03352	2.04791	1.34387	2.20934	1.34015	0.897105	1.3315	1.45278	1.81391	0.795782	1.09861	1.84971	1.19923	1.68252	1.28006	0.499983	1.23953	1.606	0.713852	0.656149	1.62706	0.944359	0.711856	1.39544	0.694379	0.99836	1.43225	1.64004	0.47653
Cell_0178	FOXO_TR	EAA 1.000000e-01 X + Insulin 10000 ng/ml	2.94149	1.25679	1.41424	2.16791	1.69963	2.70173	3.16065	1.38643	1.47881	1.87573	1.56096	1.91226	2.64045	1.42021	2.00189	2.45026	1.57634	1.86547	3.35184	2.58928	1.90201	3.18232	1.25737	2.25416	2.68628	1.67181	2.58452	1.0072	2.13201	3.16309	1.6063	2.54918	2.842	1.30155	1.65562	2.52399	1.37123	1.58173	1.98705	1.71536	1.18242	3.2594	1.29121	1.15279	2.79129	1.17093	1.83105
Cell_0178	AMPKARt2	EAA 1.000000e-01 X + Insulin 10000 ng/ml	0.691443	0.481965	0.499341	0.584241	0.641117	0.739177	0.660721	0.61289	0.56526	0.435602	0.706727	0.404752	0.680402	0.529017	0.506972	0.540964	0.597428	0.63579	0.663136	0.753857	0.602998	0.589933	0.468827	0.630092	0.615597	0.420536	0.69982	0.584519	0.610473	0.722127	0.571699	0.590977	0.505743	0.709126	0.664234	0.532976	0.713977	0.606962	0.580793	0.528009	0.629889	0.556138	0.538988	0.704175	0.606073	0.58059	0.650587
Cell_0179	TFEB_TR	EAA 1.000000e-01 X + Insulin 10000 ng/ml	1.61179	1.60576	1.19405	1.19851	1.02241	1.26909	1.48309	0.920101	0.715291	1.4206	2.07337	0.990491	0.961915	1.71266	1.96825	1.3146	1.54555	1.81334	2.48704	1.98361	1.4317	2.20843	1.33487	1.07953	1.21389	1.13306	1.73627	0.542184	1.18306	2.10921	1.16914	1.68265	1.44856	0.509344	0.948588	1.59229	0.704168	0.658571	1.54284	0.909303	0.687598	1.44319	0.690745	0.869166	1.48012	1.88709	0.522902
Cell_0179	FOXO_TR	EAA 1.000000e-01 X + Insulin 10000 ng/ml	2.84755	1.24522	1.4084	2.22178	1.76098	2.65341	3.19288	1.38871	1.41744	1.8431	1.51417	2.00156	2.69257	1.43329	2.31148	2.49287	1.58644	1.99944	3.27527	2.51051	1.98873	3.17676	1.25276	2.11513	3.03282	1.66631	2.64776	1.01583	2.15632	3.35814	1.61159	2.5712	2.91938	1.24422	1.69734	2.53553	1.37619	1.53842	1.96595	1.60748	1.17441	3.34738	1.27288	1.12264	2.68428	1.16763	1.95781
Cell_0179	AMPKARt2	EAA 1.000000e-01 X + Insulin 10000 ng/ml	0.705675	0.456961	0.501442	0.589204	0.652874	0.736972	0.660929	0.610436	0.55559	0.436667	0.700701	0.417076	0.690544	0.519142	0.557053	0.552057	0.600111	0.650866	0.66389	0.750736	0.593801	0.599806	0.500689	0.628044	0.69888	0.43269	0.699577	0.611965	0.611014	0.713304	0.580287	0.595522	0.520879	0.714983	0.648914	0.531801	0.682545	0.613949	0.560034	0.523181	0.650481	0.554781	0.532566	0.712118	0.59106	0.578088	0.652762
Cell_0180	TFEB_TR	EAA 1.000000e-01 X + Insulin 10000 ng/ml	1.27697	1.65585	1.06554	1.21663	1.09808	1.21201	1.94439	0.898293	0.748625	1.39635	2.07465	0.983189	1.15098	1.71519	1.87363	1.20239	1.50193	1.80981	2.31516	1.77386	1.51234	0.657533	1.34407	1.20089	1.35015	1.53483	1.69481	0.636035	1.0674	1.45745	1.30597	1.61556	1.37827	0.49361	1.08948	1.54265	0.694058	0.684726	1.44004	0.933727	0.708329	1.41434	0.698803	0.728773	1.52168	2.06219	0.517328
Cell_0180	FOXO_TR	EAA 1.000000e-01 X + Insulin 10000 ng/ml	2.71692	1.26769	1.39955	2.25012	1.74669	2.58667	3.20224	1.43673	1.67424	1.79782	1.51477	2.41728	2.78868	1.42667	2.40948	2.43529	1.61101	2.03201	3.29762	2.52805	2.07482	1.33109	1.26406	2.18995	3.02698	1.72315	2.73812	1.03974	2.09631	3.3867	1.72074	2.56302	2.73001	1.21147	1.76591	2.49148	1.36729	1.52776	1.92258	1.50049	1.20526	3.34883	1.28152	1.11497	2.7193	1.15657	2.0018
Cell_0180	AMPKARt2	EAA 1.000000e-01 X + Insulin 10000 ng/ml	0.70767	0.458283	0.492468	0.590116	0.654263	0.73449	0.664282	0.596509	0.557431	0.435607	0.70542	0.449948	0.696893	0.525666	0.590656	0.52046	0.598518	0.643864	0.672661	0.747681	0.58745	0.566747	0.492751	0.634069	0.697628	0.437244	0.705126	0.605222	0.609718	0.705023	0.572535	0.591562	0.516473	0.703924	0.639439	0.545611	0.66191	0.60758	0.569906	0.527549	0.66634	0.544367	0.539134	0.716084	0.593444	0.582472	0.656691
Cell_0181	TFEB_TR	EAA 1.000000e-01 X + Insulin 10000 ng/ml	0.889561	1.68844	1.14652	1.20507	1.22703	1.1315	1.91201	0.951163	0.795621	1.36418	1.31018	1.0434	1.27038	1.49691	1.73323	0.935569	1.65464	1.50838	0.772049	1.6933	1.48308	0.642131	1.3916	1.17622	1.2991	1.63926	1.71275	0.695037	1.01565	1.23514	1.38504	1.65548	1.24662	0.4897	1.21769	1.52156	0.672146	0.690494	1.48277	0.949971	0.778336	1.41162	0.723763	0.685368	1.55243	1.91063	0.452614
Cell_0181	FOXO_TR	EAA 1.000000e-01 X + Insulin 10000 ng/ml	2.71319	1.2737	1.3723	2.22847	1.7374	2.71237	3.22697	1.46449	2.67437	1.74614	1.54157	2.67022	2.76197	1.42951	2.45369	2.3895	1.62123	1.99267	1.88905	2.57905	2.07054	1.37479	1.30903	2.30834	3.04729	1.77256	2.71196	1.05065	1.97804	3.16554	1.81812	2.57048	2.60236	1.23837	1.77393	2.43282	1.32435	1.50852	1.92167	1.54197	1.26369	3.21571	1.32782	1.13356	2.87713	1.16457	1.95734
Cell_0181	AMPKARt2	EAA 1.000000e-01 X + Insulin 10000 ng/ml	0.699103	0.469771	0.486282	0.583056	0.638832	0.743033	0.672241	0.603945	0.579947	0.431417	0.698514	0.460773	0.688638	0.535221	0.575113	0.516995	0.587957	0.636403	0.696116	0.743206	0.58481	0.57725	0.474147	0.619734	0.697238	0.424567	0.701426	0.591689	0.604191	0.721727	0.555169	0.582835	0.502904	0.700999	0.649009	0.539588	0.651506	0.616243	0.5811	0.521923	0.660386	0.538445	0.548689	0.708394	0.586198	0.590744	0.658767
Cell_0182	TFEB_TR	EAA 1.000000e-01 X + Insulin 10000 ng/ml	1.42033	1.75389	1.18987	1.23128	1.36017	1.21278	1.43091	1.05807	0.787172	1.34648	1.38184	1.08427	1.12005	1.5879	1.92748	1.57652	1.7012	1.40611	0.814701	1.67739	1.41794	0.681691	1.46866	1.19651	1.30993	1.10911	1.69569	0.616172	1.09771	1.62304	1.30246	1.47677	1.20082	0.497966	1.08519	1.58539	0.643142	0.664155	1.64788	0.948647	0.789818	1.4529	0.734519	0.660972	1.48509	1.68832	0.432801
Cell_0182	FOXO_TR	EAA 1.000000e-01 X + Insulin 10000 ng/ml	2.76431	1.27782	1.49737	2.26188	1.74293	3.00142	3.21243	1.41792	3.50237	1.73208	1.5081	2.56407	2.75916	1.41964	2.74468	2.61784	1.60193	1.91834	1.83802	2.63621	1.97869	1.39971	1.37079	2.22413	3.07574	1.70595	2.62571	1.05176	1.93726	3.09052	1.79261	2.59585	2.62848	1.28002	1.76226	2.47352	1.2786	1.48296	2.00772	1.58374	1.22544	3.19429	1.33689	1.1364	2.91808	1.16802	1.90855
Cell_0182	AMPKARt2	EAA 1.000000e-01 X + Insulin 10000 ng/ml	0.70377	0.477012	0.509111	0.583856	0.626832	0.745971	0.66208	0.612551	0.592641	0.431992	0.688724	0.458457	0.685635	0.542586	0.553943	0.512315	0.573828	0.64485	0.702383	0.744628	0.579754	0.571549	0.477732	0.600883	0.686693	0.41876	0.688951	0.593681	0.616714	0.734252	0.561618	0.584257	0.501965	0.714934	0.657878	0.520806	0.647344	0.626411	0.562178	0.532176	0.6619	0.549113	0.540822	0.707995	0.572542	0.591153	0.658141
Cell_0183	TFEB_TR	EAA 1.000000e-01 X + Insulin 10000 ng/ml	2.04644	1.86356	1.08713	1.26435	1.44247	1.16192	1.22084	1.12259	0.748378	1.36595	1.82151	1.08879	1.81444	1.93933	2.17814	1.60831	1.71026	1.53063	0.856759	1.71855	1.40869	0.651086	1.51693	1.18831	1.32768	0.939664	1.63852	0.777136	1.06708	1.45663	1.24063	1.19325	1.21878	0.542024	1.08147	1.72753	0.645101	0.66214	1.69206	1.00554	0.749588	1.46875	0.730237	0.637959	1.44694	1.66597	0.480393
Cell_0183	FOXO_TR	EAA 1.000000e-01 X + Insulin 10000 ng/ml	2.76373	1.42848	2.05433	2.34978	1.70067	3.16652	3.17838	1.39431	3.27507	1.76982	1.42436	2.51199	1.56378	1.38385	2.87739	2.82151	1.61488	1.84317	1.87649	2.69761	1.9654	1.40113	1.39845	2.10381	3.01654	1.64013	2.61761	1.06604	1.94385	3.206	1.76889	2.51089	2.6293	1.30212	1.75261	2.65069	1.27651	1.55768	2.05271	1.55078	1.16473	3.33872	1.30711	1.13042	2.8157	1.15056	1.92284
Cell_0183	AMPKARt2	EAA 1.000000e-01 X + Insulin 10000 ng/ml	0.713819	0.499656	0.537373	0.588075	0.624922	0.73475	0.645234	0.612527	0.58426	0.437061	0.697434	0.459568	0.61951	0.552394	0.548775	0.493675	0.580452	0.6549	0.701314	0.753573	0.575379	0.579636	0.484573	0.598916	0.688972	0.431762	0.681791	0.604979	0.630636	0.71987	0.581952	0.591298	0.506216	0.716253	0.652451	0.516294	0.65654	0.616244	0.54544	0.563463	0.65972	0.562549	0.532691	0.713606	0.578532	0.580871	0.666407
Cell_0184	TFEB_TR	EAA 1.000000e-01 X + Insulin 10000 ng/ml	1.78341	1.96938	1.13171	1.23599	1.44423	1.07825	1.3455	1.1335	0.738668	1.84089	1.16296	1.08482	3.32779	1.84064	1.98205	1.65514	1.88408	1.59042	0.854002	1.76396	1.43304	0.639337	1.53477	1.07384	1.27592	1.17087	1.58372	0.939795	1.01336	1.3455	1.22398	1.33722	1.3008	0.601217	1.26741	1.84983	0.666019	0.674743	1.42045	1.05691	0.743019	1.4784	0.74786	0.745885	1.55356	1.82391	0.49647
Cell_0184	FOXO_TR	EAA 1.000000e-01 X + Insulin 10000 ng/ml	2.84453	1.66863	2.80463	2.36115	1.63309	3.09504	3.2128	1.40509	2.74593	1.39317	1.3875	2.51618	1.5767	1.39063	2.69155	2.73313	1.63169	1.85929	1.85961	2.68027	2.01678	1.42688	1.39748	2.20904	2.8203	1.73169	2.66425	1.05142	1.88955	3.21312	1.76373	2.41538	2.62808	1.33231	1.72952	2.85536	1.30342	1.68023	1.9947	1.56554	1.1843	3.49742	1.30632	1.15161	2.8154	1.14165	1.9666
Cell_0184	AMPKARt2	EAA 1.000000e-01 X + Insulin 10000 ng/ml	0.712977	0.51955	0.531549	0.581636	0.634466	0.733289	0.653886	0.628149	0.579745	0.448561	0.710656	0.450481	0.610096	0.562917	0.550836	0.480335	0.593145	0.642827	0.697748	0.756379	0.57439	0.598979	0.480782	0.597388	0.708597	0.449518	0.689931	0.612596	0.629544	0.706223	0.573092	0.590162	0.511734	0.704203	0.641709	0.522231	0.655966	0.605163	0.536498	0.568089	0.648669	0.560815	0.535715	0.707651	0.568641	0.56736	0.670541
Cell_0185	TFEB_TR	EAA 1.000000e-01 X + Insulin 10000 ng/ml	1.3889	2.05054	1.38405	1.20737	1.39046	1.22239	2.4275	1.08017	0.780405	1.85215	0.855257	1.09064	1.86569	1.60372	1.71111	1.70089	1.84909	1.60172	0.83417	1.68307	1.45848	0.75581	1.59216	1.0315	1.41859	1.18212	1.56747	0.747355	1.02872	1.88174	1.18462	1.56955	1.30862	0.594607	1.27654	1.85042	0.65955	0.669154	1.24316	1.05596	0.754997	1.52429	0.791663	0.941493	1.56434	1.84883	0.461692
Cell_0185	FOXO_TR	EAA 1.000000e-01 X + Insulin 10000 ng/ml	2.98702	1.72501	3.20098	2.27898	1.58675	2.99632	2.20757	1.37645	2.66924	1.35175	1.40926	2.42288	1.49581	1.43217	2.59971	2.59745	1.59781	1.90532	1.78917	2.62855	2.05627	1.47471	1.42772	2.32629	2.65328	1.83188	2.63143	0.999428	1.8427	3.13517	1.72089	2.40131	2.66647	1.3548	1.70574	2.93446	1.3147	1.68844	1.99354	1.59306	1.15607	3.55846	1.34166	1.15381	2.91925	1.1427	1.96892
Cell_0185	AMPKARt2	EAA 1.000000e-01 X + Insulin 10000 ng/ml	0.705377	0.485152	0.523743	0.589056	0.644774	0.747418	0.621757	0.635423	0.591516	0.457598	0.713334	0.430907	0.626981	0.56495	0.555827	0.475616	0.587799	0.625099	0.703628	0.754336	0.578403	0.599378	0.472787	0.597221	0.712326	0.451791	0.708866	0.597262	0.62984	0.708918	0.55399	0.583719	0.516067	0.711949	0.639138	0.5202	0.655108	0.606462	0.526931	0.545806	0.648748	0.543429	0.530109	0.703766	0.544076	0.564214	0.661987
Cell_0186	TFEB_TR	EAA 1.000000e-01 X + Insulin 10000 ng/ml	1.60354	2.11224	1.55412	1.23225	1.37128	1.38414	4.59167	1.02088	0.815636	1.80553	1.54783	1.10668	0.701099	1.93741	1.7887	1.66031	1.50009	1.57937	0.86124	1.69321	1.4643	0.77669	1.65248	1.09185	1.51015	1.10053	1.578	0.630515	0.999435	1.84571	1.22557	1.48644	1.24841	0.577113	1.18177	1.82439	0.651739	0.689272	1.36313	1.09356	0.75176	1.57171	0.848311	0.879853	1.48718	1.62196	0.459276
Cell_0186	FOXO_TR	EAA 1.000000e-01 X + Insulin 10000 ng/ml	3.01255	1.57709	3.25786	1.78226	1.54627	3.00836	2.2931	1.37324	2.65092	1.32674	1.4205	2.42403	1.44481	1.41972	2.66672	2.66399	1.57291	1.84508	1.80142	2.64385	2.1044	1.49224	1.47732	2.13733	2.61219	1.78605	2.55937	1.00013	1.86614	3.04967	1.73805	2.38746	2.69624	1.38724	1.71991	2.88439	1.30977	1.58998	2.08003	1.57056	1.09067	3.52818	1.38052	1.12049	2.95399	1.12756	1.96971
Cell_0186	AMPKARt2	EAA 1.000000e-01 X + Insulin 10000 ng/ml	0.700255	0.436713	0.546201	0.621761	0.642627	0.754453	0.635446	0.612964	0.602305	0.46381	0.708159	0.417536	0.640694	0.552346	0.552236	0.485716	0.585665	0.635876	0.710636	0.754886	0.581815	0.593521	0.467469	0.60976	0.708692	0.449253	0.720384	0.578325	0.626105	0.710641	0.567602	0.583273	0.510579	0.729011	0.644118	0.512417	0.673669	0.604023	0.530729	0.532903	0.645788	0.530214	0.515302	0.715514	0.552609	0.564476	0.666397
Cell_0187	TFEB_TR	EAA 1.000000e-01 X + Insulin 10000 ng/ml	0.763238	2.13086	1.45972	1.30237	1.3899	1.42708	3.85628	1.17692	0.788387	1.76487	1.66371	1.08184	1.75611	2.12823	2.00966	1.58374	1.39913	1.47062	0.897676	1.88551	1.43145	0.674233	1.6421	1.0715	1.23637	1.19471	1.5621	0.767331	1.00999	1.34524	1.32945	1.46961	1.28914	0.602777	1.37083	1.82905	0.670917	0.712698	1.46931	1.1724	0.766903	1.57767	0.923195	0.611617	1.60943	1.54383	0.487871
Cell_0187	FOXO_TR	EAA 1.000000e-01 X + Insulin 10000 ng/ml	1.49386	1.44003	3.29056	1.72983	1.49867	3.06849	2.30609	1.43912	2.46218	1.3129	1.41136	2.44281	1.47706	1.38323	2.6922	2.76321	1.58646	1.74987	1.84123	2.62911	2.11671	1.51073	1.49381	1.95025	2.54709	1.68329	2.55042	1.0438	1.89542	2.97049	1.80719	2.427	2.75891	1.49381	1.74504	2.79225	1.28766	1.5104	2.10438	1.6001	1.14474	3.51992	1.40613	1.11285	2.99279	1.10846	2.01359
Cell_0187	AMPKARt2	EAA 1.000000e-01 X + Insulin 10000 ng/ml	0.563006	0.447882	0.555629	0.615479	0.644052	0.746916	0.620164	0.595631	0.596084	0.46623	0.699014	0.413685	0.634144	0.537654	0.542073	0.489136	0.594963	0.655629	0.704132	0.752168	0.578375	0.598267	0.4663	0.62426	0.713933	0.452025	0.705036	0.5928	0.621837	0.704774	0.589139	0.587026	0.505605	0.725604	0.642977	0.519761	0.67079	0.599133	0.537361	0.525906	0.638177	0.53393	0.509522	0.719941	0.572467	0.559206	0.680569
Cell_0188	TFEB_TR	EAA 1.000000e-01 X + Insulin 10000 ng/ml	0.756032	2.13787	1.27947	1.41681	1.4269	1.3777	2.45984	1.39201	0.7549	1.74574	1.91487	1.02225	2.05333	1.68742	2.09529	1.59504	1.64571	1.38139	0.89228	1.8779	1.4021	0.688734	1.62662	1.01335	1.08363	1.31871	1.59291	0.761532	1.05353	1.70858	1.37829	1.65129	1.33004	0.599296	1.6757	1.73195	0.684076	0.681073	1.66841	1.21387	0.786785	1.57764	1.00832	0.585931	1.73945	1.74068	0.475741
Cell_0188	FOXO_TR	EAA 1.000000e-01 X + Insulin 10000 ng/ml	1.49098	1.38033	3.29883	1.68743	1.47061	3.11467	2.31237	1.4702	2.46936	1.30339	1.4182	2.27876	1.52487	1.37866	2.68424	2.79299	1.60645	1.73758	1.85834	2.52677	2.10446	1.55582	1.49102	2.09579	2.46816	1.62581	2.55503	1.03345	1.91356	3.02623	1.80795	2.50429	2.80621	1.56722	1.70678	2.72012	1.24261	1.48972	2.06325	1.64967	1.16788	3.53892	1.41319	1.10016	3.08096	1.10785	2.06479
Cell_0188	AMPKARt2	EAA 1.000000e-01 X + Insulin 10000 ng/ml	0.571339	0.484329	0.533043	0.632421	0.653583	0.738104	0.615136	0.597541	0.584567	0.471328	0.696613	0.412719	0.628209	0.541693	0.55148	0.468582	0.599281	0.653491	0.695625	0.75021	0.575576	0.600942	0.467912	0.633882	0.709781	0.437296	0.679729	0.60721	0.640243	0.699132	0.586666	0.590257	0.505904	0.70998	0.638765	0.53754	0.635648	0.608158	0.534426	0.522612	0.651691	0.548086	0.511776	0.703792	0.575355	0.564281	0.681394
Cell_0189	TFEB_TR	EAA 1.000000e-01 X + Insulin 10000 ng/ml	0.750397	2.20777	1.21293	1.42214	1.47488	1.1669	2.54665	1.29153	0.768808	1.7015	2.90805	1.02404	1.25154	1.54842	2.01779	1.63788	1.74295	1.32117	0.871727	1.63251	1.43007	0.709616	1.65733	0.993094	1.23457	1.29315	1.6997	0.705858	1.02854	2.2352	1.43746	1.79725	1.24325	0.642442	1.54124	1.64477	0.705856	0.662703	1.8904	1.22207	0.762092	1.59955	1.08829	0.696955	1.64959	1.73838	0.443902
Cell_0189	FOXO_TR	EAA 1.000000e-01 X + Insulin 10000 ng/ml	1.48586	1.3502	3.2454	1.67691	1.466	3.07347	2.336	1.45039	2.83226	1.29391	1.42793	2.1321	1.57977	1.36413	2.7006	2.9182	1.63067	1.75061	1.89277	2.47224	2.161	1.56243	1.51138	2.22045	2.48039	1.66983	2.53097	1.03655	1.93207	3.09078	1.76545	2.51483	2.74151	1.50325	1.67275	2.67375	1.23707	1.45272	2.04588	1.58087	1.06116	3.47025	1.41567	1.14152	3.05972	1.11512	2.21323
Cell_0189	AMPKARt2	EAA 1.000000e-01 X + Insulin 10000 ng/ml	0.576053	0.487435	0.521311	0.640183	0.652799	0.738679	0.630253	0.602733	0.584133	0.482208	0.704468	0.414274	0.632763	0.555323	0.572446	0.460096	0.602731	0.651063	0.696516	0.756675	0.579218	0.605999	0.466373	0.63822	0.70128	0.415408	0.68304	0.591103	0.65582	0.695319	0.577009	0.59432	0.496204	0.694096	0.647598	0.537019	0.62087	0.622137	0.535592	0.538954	0.668824	0.560882	0.511894	0.694278	0.584991	0.573934	0.681855
Cell_0190	TFEB_TR	EAA 1.000000e-01 X + Insulin 10000 ng/ml	0.750094	2.27539	1.1928	1.32758	1.42962	1.08907	3.10767	1.06705	0.801834	1.66991	2.43251	1.0706	1.65584	1.87581	2.0004	1.72726	1.56678	1.1779	0.85376	1.54503	1.49377	0.612345	1.65454	0.909965	1.21841	1.19848	1.70834	0.807773	1.08536	1.82766	1.62088	1.86329	1.21218	0.809392	1.10733	1.68342	0.769307	0.68954	1.61321	1.21201	0.738015	1.58755	1.17373	0.681039	1.65985	1.48207	0.469992
Cell_0190	FOXO_TR	EAA 1.000000e-01 X + Insulin 10000 ng/ml	1.51404	1.34221	3.17331	1.67892	1.4547	2.94971	2.3645	1.45731	3.15772	1.27894	1.41136	2.13691	1.65234	1.33448	2.74553	3.08588	1.62326	1.74483	1.87917	2.5155	2.20132	1.51873	1.54641	2.11855	2.47117	1.80009	2.49499	1.1226	1.95166	2.99387	1.72324	2.58168	2.65969	1.44837	1.70165	2.52235	1.29809	1.42759	2.08191	1.45859	1.19229	3.36308	1.43829	1.46495	2.97236	1.12326	2.56015
Cell_0190	AMPKARt2	EAA 1.000000e-01 X + Insulin 10000 ng/ml	0.578702	0.465019	0.531184	0.630192	0.650592	0.743619	0.631645	0.608685	0.584878	0.485394	0.705201	0.424088	0.64175	0.552221	0.570633	0.478285	0.606224	0.660219	0.701197	0.762172	0.581309	0.625676	0.455467	0.63874	0.698728	0.423073	0.700707	0.593337	0.647183	0.692893	0.571248	0.593906	0.483453	0.691748	0.659809	0.520429	0.635398	0.623496	0.542584	0.552517	0.663008	0.557846	0.504825	0.711406	0.599851	0.565071	0.690799
Cell_0191	TFEB_TR	EAA 1.000000e-01 X + Insulin 10000 ng/ml	0.754928	2.23079	1.22889	1.35583	1.34828	1.32614	3.04648	1.03109	0.846428	1.70049	1.1216	1.07611	2.10021	1.86489	2.03496	1.94682	1.44923	1.07675	0.853354	1.64555	1.5211	0.650778	1.59694	0.887901	1.14026	1.25712	1.61455	0.867151	1.18067	1.36833	1.97945	1.81314	1.30909	0.917824	1.0134	1.61971	0.817258	0.68565	1.30976	1.18882	0.769294	1.55461	1.25535	0.831026	1.83426	1.47205	0.546092
Cell_0191	FOXO_TR	EAA 1.000000e-01 X + Insulin 10000 ng/ml	1.54045	1.33752	3.02769	1.67855	1.44382	2.90869	2.38504	1.50661	2.96713	1.27897	1.39882	2.15818	1.7403	1.3115	2.70606	3.08137	1.5816	1.79312	1.83644	2.56843	2.13813	1.49496	1.53827	2.15229	2.41914	1.88044	2.46156	1.16265	1.99581	2.92826	1.66348	2.64929	2.61131	1.48297	1.67897	2.32957	1.32446	1.63786	2.18533	1.39214	1.71703	3.32867	1.46838	1.94277	2.97436	1.13802	2.85788
Cell_0191	AMPKARt2	EAA 1.000000e-01 X + Insulin 10000 ng/ml	0.57336	0.440188	0.539656	0.634015	0.650828	0.742873	0.629946	0.609199	0.573541	0.477121	0.694145	0.437724	0.643394	0.542274	0.563905	0.489327	0.605121	0.65659	0.708361	0.759719	0.575268	0.635145	0.445689	0.638459	0.689701	0.446921	0.698534	0.620992	0.645215	0.69333	0.569259	0.588012	0.486768	0.712577	0.657238	0.51645	0.642194	0.617847	0.544156	0.537219	0.65256	0.543314	0.494814	0.72686	0.601081	0.556681	0.696877
Cell_0192	TFEB_TR	EAA 1.000000e-01 X + Insulin 10000 ng/ml	0.758612	2.12541	1.36138	1.47397	1.42025	1.3342	2.57851	1.18291	0.895535	1.72497	1.56502	1.07405	1.51823	1.59671	1.8029	2.07383	1.5617	1.19764	0.906846	1.75603	1.47527	0.792616	1.55784	1.02237	1.36081	1.36019	1.57521	0.888806	1.09366	1.46212	2.41992	1.6882	1.32775	0.911615	1.20057	1.52504	0.819793	0.672963	1.71289	1.21409	0.810029	1.58375	1.28506	1.09676	1.8043	1.70708	0.601348
Cell_0192	FOXO_TR	EAA 1.000000e-01 X + Insulin 10000 ng/ml	1.53297	1.30819	2.88261	1.68042	1.46114	2.93711	2.39267	1.6032	2.57521	1.30708	1.4243	2.09502	1.79635	1.2905	2.50209	2.9958	1.58422	1.87379	1.90172	2.59573	2.07442	1.51527	1.48938	2.35666	2.42406	1.88708	2.50895	1.12917	1.97348	2.92229	1.63438	2.50164	2.53187	1.48216	1.75096	2.41036	1.28944	2.04509	2.27865	1.35946	2.19833	3.33897	1.46448	2.21375	2.97266	1.13889	2.86481
Cell_0192	AMPKARt2	EAA 1.000000e-01 X + Insulin 10000 ng/ml	0.56422	0.435137	0.543837	0.643447	0.634508	0.741665	0.640959	0.59889	0.564228	0.477093	0.689206	0.436899	0.634541	0.549603	0.57708	0.490103	0.604794	0.644434	0.708311	0.754022	0.566968	0.620347	0.44997	0.632796	0.686257	0.463725	0.696058	0.623279	0.649502	0.692378	0.579475	0.586541	0.494933	0.717163	0.652255	0.531239	0.630228	0.616007	0.537909	0.522071	0.651041	0.539887	0.495453	0.716011	0.599692	0.567742	0.700957
Cell_0193	TFEB_TR	EAA 1.000000e-01 X + Insulin 10000 ng/ml	0.754678	2.05552	1.40337	1.45811	1.50505	1.03967	2.52292	1.4706	0.891888	1.66743	2.15467	1.08203	2.02024	1.52566	1.60489	1.99844	1.63497	1.34194	0.972412	1.8539	1.42492	0.746588	1.52353	1.09527	1.60644	1.21174	1.56767	1.00411	0.963663	1.40357	2.62417	1.57556	1.26308	0.931519	1.32705	1.56244	0.839825	0.7065	1.93153	1.26301	0.817047	1.61558	1.2582	1.03701	1.0125	1.7136	0.622687
Cell_0193	FOXO_TR	EAA 1.000000e-01 X + Insulin 10000 ng/ml	1.53895	1.27592	2.86733	1.66625	1.49214	2.88989	2.46739	1.6935	2.53041	1.31914	1.46426	1.96284	1.75489	1.30953	2.38814	2.97142	1.58331	1.89128	2.01555	2.63345	2.0639	1.52776	1.46611	2.35902	2.42906	1.8626	2.61374	1.13915	1.90118	2.82101	1.64767	2.39238	2.45989	1.43508	2.23701	2.50415	1.30097	2.27608	2.27195	1.34636	2.31548	3.3467	1.42667	2.3547	1.95776	1.11185	2.79474
Cell_0193	AMPKARt2	EAA 1.000000e-01 X + Insulin 10000 ng/ml	0.567577	0.458112	0.54627	0.633472	0.624299	0.746867	0.640554	0.591045	0.577387	0.48646	0.696445	0.424837	0.63595	0.562955	0.580012	0.4882	0.600352	0.647809	0.687151	0.754265	0.564864	0.616168	0.459923	0.62631	0.701236	0.475012	0.704942	0.613338	0.639384	0.689164	0.585326	0.591985	0.494514	0.68887	0.659986	0.546446	0.620468	0.613986	0.535729	0.529784	0.647559	0.548754	0.49916	0.706748	0.435584	0.572637	0.699611
Cell_0194	TFEB_TR	EAA 1.000000e-01 X + Insulin 10000 ng/ml	0.744801	2.03968	1.34738	1.35751	1.42065	1.06721	2.87297	1.54924	0.835486	1.62214	1.37197	1.05061	3.00709	1.47134	1.82004	1.9559	1.40144	1.26816	1.0223	1.8398	1.4509	0.669553	1.44265	1.06051	1.56855	0.960007	1.5649	1.16919	0.99509	1.32089	2.61884	1.44618	1.25085	0.971216	1.42351	1.46824	0.880974	0.719531	1.33679	1.21985	0.804658	0.911486	1.23104	0.865595	1.01617	1.52375	0.629944
Cell_0194	FOXO_TR	EAA 1.000000e-01 X + Insulin 10000 ng/ml	1.56315	1.28521	2.88595	1.65665	1.50856	2.86747	2.56597	1.67677	2.50515	1.30502	1.50994	1.94117	1.74825	1.33026	2.49701	2.89678	1.53068	1.87139	2.05213	2.6949	2.09406	1.49402	1.42589	2.16377	2.40039	1.7748	2.65285	1.15589	2.15184	2.77347	1.60904	2.56414	2.41451	1.41543	2.85375	2.18973	1.35534	2.29279	2.27193	1.33592	2.27343	1.50937	1.39611	2.51532	1.87467	1.09107	2.78238
Cell_0194	AMPKARt2	EAA 1.000000e-01 X + Insulin 10000 ng/ml	0.57694	0.478029	0.544483	0.620345	0.645938	0.750633	0.630385	0.592548	0.596921	0.485338	0.703219	0.425445	0.644859	0.565304	0.571032	0.469105	0.599566	0.657902	0.665851	0.763657	0.565053	0.632523	0.46001	0.616173	0.71359	0.475192	0.699348	0.622376	0.645873	0.692658	0.569245	0.603653	0.495583	0.676611	0.667947	0.550424	0.632984	0.610644	0.550944	0.532825	0.64453	0.655891	0.491932	0.712708	0.422489	0.562865	0.693438
Cell_0195	TFEB_TR	EAA 1.000000e-01 X + Insulin 10000 ng/ml	0.743885	2.0476	1.31359	1.35043	1.35536	1.32926	2.73474	1.24307	0.804547	1.68184	1.24327	1.02739	2.16326	1.37755	1.90874	1.93857	1.16181	1.16347	1.14934	1.8039	1.49325	0.755921	1.38117	0.994318	1.35287	0.88394	1.61069	1.20694	1.10414	1.74157	2.97242	1.46672	1.21534	0.994927	1.3496	1.31729	0.892351	0.676842	1.62987	1.14656	0.783037	0.780561	1.23594	0.86796	1.00054	1.54292	0.608407
Cell_0195	FOXO_TR	EAA 1.000000e-01 X + Insulin 10000 ng/ml	1.58601	1.31062	2.85452	1.67473	1.51225	2.90218	2.52675	1.61238	2.28487	1.32629	1.56297	2.05411	1.93639	1.28787	2.5586	2.74523	1.54903	1.86402	2.05416	2.71452	2.17591	1.45421	1.36457	2.08581	2.3827	1.77434	2.72452	1.11667	2.78354	2.83152	1.52664	2.77069	2.38374	1.39871	3.09141	1.9806	1.36298	2.32337	3.02862	1.27605	2.35601	1.546	1.39802	2.47655	1.80929	1.09704	2.64181
Cell_0195	AMPKARt2	EAA 1.000000e-01 X + Insulin 10000 ng/ml	0.580304	0.476193	0.543773	0.623764	0.666602	0.74942	0.62445	0.594636	0.587146	0.47574	0.700601	0.432808	0.634855	0.560046	0.578005	0.447504	0.617604	0.653326	0.670177	0.764229	0.561392	0.636668	0.452502	0.59438	0.713098	0.471391	0.686066	0.629122	0.683089	0.696908	0.561027	0.616482	0.497577	0.693661	0.665214	0.551088	0.651723	0.613512	0.597704	0.526943	0.647665	0.669362	0.494121	0.707257	0.440393	0.563477	0.69701
Cell_0196	TFEB_TR	EAA 1.000000e-01 X + Insulin 10000 ng/ml	0.756358	2.02201	1.22091	1.4115	1.40693	1.30371	2.32971	1.13485	0.822685	1.72386	1.96333	1.04708	1.0666	1.51621	1.71005	1.9041	1.24625	1.28076	1.32609	1.95373	1.48518	0.798128	1.40867	0.965884	1.19828	0.93045	1.63697	0.932026	1.12353	1.98198	3.49774	1.66012	1.17191	1.01134	1.28509	0.938701	0.895533	0.638115	1.71054	1.16249	0.768246	0.914506	1.25127	0.847367	1.04384	1.68091	0.597824
Cell_0196	FOXO_TR	EAA 1.000000e-01 X + Insulin 10000 ng/ml	1.6258	1.30594	2.81956	1.68869	1.52549	2.78958	2.4203	1.56675	2.27974	1.37194	1.57635	2.03126	2.12469	1.29629	2.53265	2.61785	1.55802	1.90191	2.06538	2.62807	2.23521	1.44907	1.52186	2.16482	2.34394	1.9904	2.87622	1.09219	3.27238	2.81084	1.53512	2.87614	2.47991	1.42317	3.10895	1.21026	1.3553	2.31076	3.03554	1.19946	2.48064	1.5961	1.42129	2.27668	1.73451	1.11242	2.45386
Cell_0196	AMPKARt2	EAA 1.000000e-01 X + Insulin 10000 ng/ml	0.586193	0.471878	0.54568	0.632359	0.666267	0.747639	0.603636	0.591122	0.564248	0.465377	0.693086	0.431962	0.627454	0.550136	0.581358	0.445672	0.628817	0.64224	0.682888	0.751661	0.561726	0.625592	0.462342	0.594284	0.707557	0.467545	0.684024	0.618264	0.699888	0.687415	0.577074	0.61332	0.496921	0.708756	0.657752	0.613573	0.649308	0.618694	0.595022	0.541049	0.645686	0.669461	0.508184	0.695486	0.438367	0.570057	0.698874
Cell_0197	TFEB_TR	EAA 1.000000e-01 X + Insulin 10000 ng/ml	0.756662	1.98695	1.17108	1.47866	1.41085	1.10838	2.39657	1.35663	0.843343	1.71913	2.05374	1.03641	1.38143	1.70897	1.78298	2.04499	1.37171	1.56659	1.3895	2.04682	1.49504	0.768232	1.4686	1.11638	1.21867	0.992918	1.63239	0.789906	1.0845	1.74733	3.22512	1.65367	0.499359	1.00543	1.64583	1.00669	0.921048	0.614292	1.47238	1.15368	0.79655	1.0478	1.25886	0.816608	1.0758	1.63407	0.65159
Cell_0197	FOXO_TR	EAA 1.000000e-01 X + Insulin 10000 ng/ml	1.65117	1.34014	2.78957	1.72634	1.53091	2.6058	2.40634	1.50396	2.35882	1.37032	1.58859	1.91881	2.09285	1.31353	2.59784	2.50243	1.452	2.05227	2.06518	2.56087	2.23154	1.44817	1.94038	2.16575	2.26339	2.17424	2.90199	1.10174	3.40236	2.77463	1.63482	2.95031	0.997897	1.53558	3.20376	1.21091	1.38573	2.21479	2.74178	1.16278	2.44088	1.6237	1.43991	2.29418	1.65238	1.13349	2.37765
Cell_0197	AMPKARt2	EAA 1.000000e-01 X + Insulin 10000 ng/ml	0.590416	0.479188	0.541495	0.622703	0.658981	0.745931	0.582673	0.590212	0.571084	0.443661	0.691588	0.437552	0.646396	0.542079	0.578987	0.453834	0.619511	0.64645	0.682519	0.756604	0.569188	0.617201	0.49623	0.616451	0.699572	0.444525	0.685641	0.599282	0.674802	0.680607	0.579607	0.599468	0.652615	0.709267	0.648772	0.629517	0.641623	0.622218	0.611914	0.5593	0.636326	0.669518	0.502085	0.695531	0.437869	0.557939	0.693838
Cell_0198	TFEB_TR	EAA 1.000000e-01 X + Insulin 10000 ng/ml	0.73749	1.98897	1.29741	1.58681	1.38058	1.12657	2.438	1.31031	0.86265	1.81963	1.71918	1.00341	1.8433	1.69882	1.95782	2.16448	1.31587	1.79503	1.37699	2.01387	1.52956	0.837404	1.48247	1.20893	1.20291	0.96841	1.71861	1.1608	1.19182	0.781736	2.61666	1.49505	0.4917	1.05277	1.77854	1.05564	0.934791	0.593466	1.2671	1.06464	0.863284	0.889896	1.27585	0.835479	1.01092	1.53032	0.683654
Cell_0198	FOXO_TR	EAA 1.000000e-01 X + Insulin 10000 ng/ml	1.63022	1.41554	2.77468	1.79403	1.51762	2.59045	2.46807	1.52492	2.28881	1.34268	1.64279	1.94076	2.0067	1.19256	2.62434	2.4243	1.63472	2.21065	2.06058	2.67445	2.2339	1.42564	2.22375	2.02206	2.19985	2.17956	2.85786	1.09663	3.43281	0.874407	1.68568	2.93821	0.995371	1.58879	3.22745	1.21698	1.41979	2.1896	2.45443	1.16039	2.36156	1.62356	1.47158	2.46034	1.57941	1.14565	2.30619
Cell_0198	AMPKARt2	EAA 1.000000e-01 X + Insulin 10000 ng/ml	0.582121	0.48581	0.52755	0.596876	0.645529	0.750094	0.598271	0.601989	0.584576	0.417434	0.699843	0.450103	0.658975	0.548223	0.596222	0.458557	0.62142	0.65923	0.679885	0.778523	0.572018	0.613812	0.523542	0.605823	0.694523	0.423715	0.691583	0.591166	0.653017	0.570448	0.563332	0.600113	0.654659	0.694025	0.643706	0.63197	0.646627	0.631118	0.622022	0.554113	0.633808	0.6754	0.486048	0.693767	0.474084	0.546397	0.705791
Cell_0199	TFEB_TR	EAA 1.000000e-01 X + Insulin 10000 ng/ml	0.734786	1.9206	1.36737	1.70632	1.42416	1.27482	2.04743	1.1086	0.895088	1.97035	1.12724	1.01523	1.7633	1.73858	1.93791	2.0273	1.28907	1.71902	1.43155	2.118	1.50625	0.866885	1.46228	1.09562	1.10631	0.842292	0.598008	1.30537	1.32348	0.759222	2.88969	1.49523	0.500412	1.15401	1.31554	0.9885	0.921638	0.595056	1.33444	1.07871	0.90121	0.72304	1.31202	0.814262	1.01135	1.48375	0.634981
Cell_0199	FOXO_TR	EAA 1.000000e-01 X + Insulin 10000 ng/ml	1.62564	1.42367	2.80581	1.78824	1.55961	2.648	2.4903	1.61119	2.38686	1.33841	1.58795	1.93392	2.01695	1.32672	2.51686	2.44293	2.27245	2.22625	2.05029	2.79704	2.23699	1.39412	2.18567	1.99629	2.22637	2.17349	3.179	1.07579	3.46148	0.859949	1.6593	2.86709	1.00798	1.52837	3.15654	1.21291	1.43826	2.13638	2.46034	1.19063	2.41389	1.60811	1.55119	2.41563	1.53575	1.12769	2.30702
Cell_0199	AMPKARt2	EAA 1.000000e-01 X + Insulin 10000 ng/ml	0.577436	0.476446	0.513553	0.587653	0.640624	0.763141	0.619101	0.611996	0.571971	0.407843	0.707158	0.445963	0.651971	0.566647	0.606627	0.444364	0.635887	0.655184	0.681064	0.784505	0.570627	0.619222	0.533241	0.585653	0.696202	0.425113	0.615049	0.606512	0.661506	0.590002	0.569794	0.604976	0.659624	0.680867	0.648464	0.634548	0.647003	0.634044	0.622444	0.54875	0.638746	0.680226	0.488778	0.684628	0.484523	0.565623	0.7161
Cell_0200	TFEB_TR	EAA 1.000000e-01 X + Insulin 10000 ng/ml	0.766119	1.79044	1.3658	1.7693	1.42899	1.19674	1.67924	1.16282	0.905975	2.08688	0.988407	1.03034	1.31945	1.83643	2.0557	2.00013	1.33381	1.40184	1.50663	2.11731	1.48647	0.790308	1.4916	1.12847	1.28472	0.871849	0.586656	0.975793	1.15718	0.767103	3.38093	1.52849	0.51787	1.19098	1.13621	0.939387	0.918959	0.595269	1.43781	1.18546	0.874766	0.813423	1.34328	0.89303	1.12416	1.37465	0.590574
Cell_0200	FOXO_TR	EAA 1.000000e-01 X + Insulin 10000 ng/ml	1.69202	1.45247	2.88374	1.74031	1.58717	2.63493	2.32475	1.5557	2.63889	1.32991	1.63222	1.84031	2.00888	1.97072	2.48607	2.45325	2.74997	2.20996	2.03728	2.72239	2.25063	1.36278	2.1625	2.52423	2.30865	2.1586	3.10137	1.05783	3.44852	0.856148	1.62751	2.88226	1.03157	1.52132	3.13817	1.19446	1.44944	1.94002	2.39226	1.20481	2.432	1.55993	1.622	2.27496	1.53461	1.11587	2.43478
Cell_0200	AMPKARt2	EAA 1.000000e-01 X + Insulin 10000 ng/ml	0.580408	0.469866	0.511748	0.591545	0.655423	0.76926	0.614423	0.607221	0.567524	0.402902	0.705991	0.428932	0.645335	0.585922	0.595753	0.412007	0.639812	0.634046	0.674546	0.779794	0.578322	0.626713	0.532478	0.694868	0.702171	0.409766	0.596884	0.617533	0.673392	0.599383	0.58932	0.594974	0.662204	0.693778	0.647922	0.638401	0.642566	0.619923	0.624711	0.554213	0.640886	0.684919	0.497381	0.673555	0.460627	0.586281	0.704253
Cell_0201	TFEB_TR	EAA 1.000000e-01 X + Insulin 10000 ng/ml	0.821015	1.82557	1.48154	1.81824	1.30716	1.19798	1.43559	1.15801	0.902215	2.23435	2.61157	1.01141	0.801083	1.75284	2.15192	2.18274	1.32879	1.28883	1.4874	1.90158	1.0428	0.862433	1.59114	1.36837	1.56306	1.03562	0.585167	0.923627	0.927718	0.79267	3.37631	1.51631	0.528753	1.14811	1.26296	1.00874	0.938796	0.580782	1.47426	1.16364	0.839603	0.933938	1.34985	1.02725	1.15885	1.30012	0.574415
Cell_0201	FOXO_TR	EAA 1.000000e-01 X + Insulin 10000 ng/ml	1.78421	1.53924	2.97732	1.76574	1.46973	2.63971	2.00319	1.59107	2.84468	1.30077	2.26259	1.89047	1.98302	2.45921	2.5487	2.3621	2.77287	2.23365	2.04462	2.66648	1.4394	1.35308	2.34517	2.55043	2.34099	2.04155	2.94124	1.0496	3.434	0.872758	1.59599	2.96436	1.03513	1.58272	3.09014	1.20934	1.43029	1.89073	2.22029	1.14341	2.3304	1.53256	1.60686	2.31995	1.53101	1.13216	2.44857
Cell_0201	AMPKARt2	EAA 1.000000e-01 X + Insulin 10000 ng/ml	0.569416	0.483108	0.517869	0.573874	0.659073	0.764432	0.617719	0.606277	0.581159	0.387346	0.709995	0.422903	0.638459	0.593488	0.592303	0.396952	0.640974	0.615587	0.669574	0.777543	0.59221	0.618693	0.511019	0.694185	0.711222	0.389624	0.59578	0.607726	0.663118	0.590775	0.58399	0.590636	0.657371	0.713227	0.639825	0.639887	0.644622	0.612382	0.625088	0.552806	0.647526	0.68879	0.497209	0.66846	0.454781	0.575911	0.709292
Cell_0202	TFEB_TR	EAA 1.000000e-01 X + Insulin 10000 ng/ml	0.89719	1.9893	1.49443	1.89283	1.24934	1.78992	1.23187	1.03205	0.910005	2.30715	3.83005	1.0078	1.28299	1.85568	1.87745	2.13455	1.29289	0.504589	1.37929	1.91162	0.960739	0.984601	1.64404	1.26116	1.50361	1.03453	0.588367	1.08497	0.97295	0.798524	3.67353	1.51097	0.523803	1.04762	1.103	1.10407	0.948074	0.591179	1.44002	1.03573	0.836575	0.935662	1.34167	0.960024	1.12498	1.38068	0.570673
Cell_0202	FOXO_TR	EAA 1.000000e-01 X + Insulin 10000 ng/ml	1.81339	1.55486	3.00639	1.78885	1.53967	2.65624	1.78928	2.00689	3.05448	1.29277	2.8218	2.00834	2.01107	2.43875	2.50027	2.20981	2.7434	1.95147	2.04181	2.80855	1.47201	1.38496	2.45217	2.60812	2.35295	1.94493	2.82051	1.05593	3.37329	0.885009	1.55034	3.00102	1.02045	1.60253	3.06067	1.24624	1.403	2.10517	2.3356	1.10577	2.34108	1.58978	1.5438	2.40363	1.52293	1.14294	2.3499
Cell_0202	AMPKARt2	EAA 1.000000e-01 X + Insulin 10000 ng/ml	0.550208	0.484729	0.514651	0.557178	0.648798	0.770058	0.632008	0.613911	0.576894	0.38561	0.722869	0.428558	0.636612	0.579532	0.595984	0.40323	0.643095	0.677589	0.682558	0.768136	0.586407	0.604518	0.487288	0.693747	0.717636	0.414835	0.595042	0.611919	0.643188	0.585312	0.571616	0.597013	0.650812	0.714956	0.648368	0.647844	0.640543	0.618513	0.635879	0.558789	0.665817	0.690854	0.490863	0.688966	0.454192	0.564102	0.723126
Cell_0203	TFEB_TR	EAA 1.000000e-01 X + Insulin 10000 ng/ml	0.974713	2.05306	1.29193	1.96603	1.41747	2.16347	1.27025	1.15761	0.884042	2.27791	2.29643	1.02161	2.43547	2.28182	1.3082	1.92758	1.24572	0.913948	1.32105	2.12028	0.885438	0.867905	1.60402	0.999945	1.38942	0.993483	0.582214	1.03656	1.01827	0.791487	3.94291	1.39343	0.515852	1.03396	1.07792	1.14414	0.94045	0.611399	1.28051	0.991842	0.845239	0.896213	1.34267	0.792387	1.14084	1.49212	0.617964
Cell_0203	FOXO_TR	EAA 1.000000e-01 X + Insulin 10000 ng/ml	1.76882	1.76535	2.93371	1.74457	2.13024	2.57722	1.74765	2.45527	3.07512	1.32098	2.38092	2.00494	1.9771	2.41536	2.15772	2.04757	2.79741	1.93791	2.0191	2.93833	1.46461	1.43042	2.37794	2.61906	2.3805	1.9589	2.839	1.08408	3.20849	0.878503	1.52163	3.02669	1.01659	1.6176	3.19811	1.22854	1.44158	2.21722	2.26462	1.16077	2.52818	1.63885	1.52389	2.38706	1.54772	1.14889	2.30754
Cell_0203	AMPKARt2	EAA 1.000000e-01 X + Insulin 10000 ng/ml	0.54251	0.471863	0.504319	0.573658	0.653266	0.783466	0.624788	0.614168	0.568048	0.404508	0.718945	0.431624	0.645493	0.55751	0.492882	0.403543	0.635846	0.669475	0.697355	0.763675	0.582188	0.600662	0.492375	0.704824	0.715126	0.447443	0.5932	0.632124	0.639147	0.598255	0.574528	0.588832	0.655403	0.708561	0.657614	0.65133	0.634321	0.615589	0.642032	0.575918	0.6733	0.691321	0.483787	0.717502	0.440558	0.574073	0.699593
Cell_0204	TFEB_TR	EAA 1.000000e-01 X + Insulin 10000 ng/ml	1.03662	2.06836	1.20166	2.06612	1.63415	1.56788	1.45321	1.27488	0.847435	2.33162	0.624137	0.700132	2.46277	2.35268	1.43548	1.97217	1.21067	1.14736	1.41487	2.19914	0.834758	0.817998	1.56684	1.02919	1.41098	1.05921	0.574896	0.98282	0.86423	0.807901	3.53827	1.28906	0.518705	1.22581	1.41084	1.03956	0.943756	0.618817	1.27405	1.02966	0.861029	0.852397	1.35148	0.745983	1.16989	1.53339	0.659218
Cell_0204	FOXO_TR	EAA 1.000000e-01 X + Insulin 10000 ng/ml	1.73728	2.37706	2.82941	1.73622	2.81101	2.51091	1.73169	2.68659	2.91168	1.33715	1.92486	1.91293	1.89462	2.53083	2.00701	1.93569	2.76504	2.01044	2.02407	2.93482	1.50329	1.46447	2.34596	2.5397	2.3436	1.98413	2.87418	1.12144	3.11835	0.887907	1.52936	3.10267	1.02539	1.6603	3.32483	1.20555	1.49945	2.13685	1.97375	1.19296	2.63785	1.62538	1.56524	2.43918	1.53828	1.15236	2.33714
Cell_0204	AMPKARt2	EAA 1.000000e-01 X + Insulin 10000 ng/ml	0.538581	0.482806	0.504721	0.590563	0.664725	0.780443	0.61293	0.614777	0.579202	0.408304	0.701093	0.652898	0.644286	0.550061	0.497378	0.40364	0.629245	0.661713	0.695439	0.77089	0.586038	0.602319	0.504269	0.710896	0.708445	0.452258	0.605991	0.630014	0.653614	0.605834	0.57702	0.578985	0.666523	0.701475	0.641995	0.636538	0.643455	0.610258	0.624804	0.574535	0.657758	0.68089	0.487023	0.715718	0.424743	0.582637	0.684224
Cell_0205	TFEB_TR	EAA 1.000000e-01 X + Insulin 10000 ng/ml	1.1117	2.12759	1.38982	2.14279	1.66056	1.02683	1.52194	1.18967	0.907933	2.40618	1.13362	0.709444	1.62143	2.02567	1.49994	2.06268	1.20271	1.0233	1.47576	2.13772	0.895118	1.04653	1.52107	1.23597	1.37776	1.07978	0.589469	0.98895	0.789981	0.832363	3.42733	1.3111	0.518303	1.29174	1.49843	0.945417	0.951527	0.639912	1.57885	1.04347	0.867571	0.927552	1.3259	0.854129	1.25029	1.49456	0.625728
Cell_0205	FOXO_TR	EAA 1.000000e-01 X + Insulin 10000 ng/ml	1.74013	2.88279	2.81786	1.76959	3.07026	2.57658	1.70551	2.87016	1.89042	1.31707	2.46473	1.88766	1.91108	2.55867	2.06095	1.88732	2.72506	2.04761	2.01853	2.88687	1.57726	1.50268	2.31403	2.49563	2.27359	1.98698	2.86676	1.13549	3.23328	0.918557	1.55193	3.11367	1.05046	1.68234	3.3185	1.25182	1.49105	2.17781	2.63659	1.17349	2.58063	1.67466	1.57355	2.53403	1.4677	1.14382	2.4767
Cell_0205	AMPKARt2	EAA 1.000000e-01 X + Insulin 10000 ng/ml	0.531826	0.496742	0.510937	0.585582	0.670697	0.771474	0.61863	0.624039	0.530315	0.396389	0.705706	0.655234	0.634636	0.55266	0.502025	0.407492	0.62902	0.67186	0.686614	0.770401	0.587261	0.604362	0.502233	0.701059	0.705903	0.466947	0.625598	0.616912	0.665126	0.596292	0.577727	0.587466	0.663835	0.693538	0.640994	0.622152	0.652839	0.616784	0.644408	0.564591	0.650704	0.665173	0.493086	0.702212	0.415752	0.57857	0.715565
Cell_0206	TFEB_TR	EAA 1.000000e-01 X + Insulin 10000 ng/ml	1.19371	2.12111	1.68782	2.10209	1.56748	0.713596	1.451	1.34918	0.860916	2.42868	2.31805	0.697403	1.32954	1.99502	1.54003	1.89691	1.15058	0.772559	1.31962	1.97176	0.968053	1.05994	1.43792	1.26813	1.55374	1.10758	0.609151	0.983438	0.879366	0.827647	3.50333	1.24882	0.518992	1.11957	1.20239	1.08315	0.944045	0.651661	1.74403	1.05462	0.846585	1.11482	1.27072	0.97311	1.4359	1.397	0.591076
Cell_0206	FOXO_TR	EAA 1.000000e-01 X + Insulin 10000 ng/ml	1.70913	2.97146	2.97292	1.73263	3.02303	1.55008	1.65466	2.96481	1.72105	1.31367	2.98446	1.84072	1.90294	2.59048	2.10867	1.81619	2.71716	2.01757	1.97386	2.8219	1.61875	1.53092	2.22657	2.54771	2.26404	2.03763	2.88489	1.13602	3.27962	0.925978	1.54831	3.0081	1.09306	1.73309	3.27125	1.28482	1.49739	2.31682	3.67958	1.17327	2.56644	1.81131	1.51771	2.50188	1.44232	1.16475	2.57514
Cell_0206	AMPKARt2	EAA 1.000000e-01 X + Insulin 10000 ng/ml	0.533066	0.486198	0.51695	0.580964	0.673119	0.738513	0.619576	0.632223	0.564027	0.401468	0.721594	0.649194	0.635571	0.549328	0.51879	0.398509	0.62961	0.683616	0.685768	0.772532	0.581253	0.603341	0.506791	0.699236	0.707338	0.481052	0.633228	0.625423	0.655147	0.589224	0.586202	0.588657	0.654267	0.68815	0.666973	0.626386	0.64703	0.620999	0.719024	0.567247	0.666074	0.663525	0.48729	0.705408	0.429288	0.573494	0.728299
Cell_0207	TFEB_TR	EAA 1.000000e-01 X + Insulin 10000 ng/ml	1.22625	2.04663	1.40578	2.0735	1.55294	0.677043	1.24609	1.58583	0.807216	2.52196	2.81072	0.685508	1.35888	2.156	1.41849	1.7696	1.10373	0.829371	1.14881	1.89867	0.939111	0.812977	1.44947	1.25345	1.90311	1.09243	0.603673	1.03082	0.921468	0.812364	2.98354	1.18532	0.537524	1.16661	0.987569	1.1837	0.937822	0.638092	1.64574	1.09349	0.852746	1.11609	1.2648	0.949845	1.60763	1.29313	0.586525
Cell_0207	FOXO_TR	EAA 1.000000e-01 X + Insulin 10000 ng/ml	1.65852	2.96057	1.36418	1.64555	2.95851	1.43938	1.58759	2.92678	1.63944	1.34087	2.85877	1.82522	1.7993	2.60965	2.06149	1.70219	2.59698	2.0513	1.98637	2.77832	1.64166	1.51628	2.36586	2.55702	2.3226	2.09641	2.84331	1.13531	3.11496	0.909775	1.5361	2.9743	1.12647	1.85575	3.20185	1.2597	1.52635	2.31564	3.37539	1.19425	2.64855	1.9025	1.54876	2.44162	1.4679	1.17363	2.44999
Cell_0207	AMPKARt2	EAA 1.000000e-01 X + Insulin 10000 ng/ml	0.541464	0.485482	0.5149	0.584119	0.666641	0.75535	0.611537	0.63442	0.553376	0.407754	0.712061	0.654901	0.640568	0.541442	0.528409	0.388762	0.63977	0.682609	0.694553	0.789301	0.587562	0.592234	0.520891	0.708449	0.708466	0.459639	0.619723	0.637871	0.636641	0.591829	0.593948	0.576954	0.657003	0.688613	0.664622	0.634233	0.637888	0.61928	0.760459	0.563979	0.673604	0.666281	0.480278	0.705768	0.437898	0.56971	0.704521
Cell_0208	TFEB_TR	EAA 1.000000e-01 X + Insulin 10000 ng/ml	1.21569	2.02292	1.58832	2.04006	1.60489	0.639264	1.08941	1.38024	0.805851	2.57747	2.32698	0.712841	1.30328	2.00747	1.23918	1.84687	1.13719	0.98768	1.12957	2.05342	0.988121	0.844756	1.5735	1.26875	1.83945	0.903286	0.589641	1.04089	0.943787	0.823743	2.76717	1.26386	0.550345	1.39242	1.1166	1.08168	0.947196	0.639431	1.67233	1.09319	0.890703	0.90793	1.30184	0.940378	1.74959	1.25705	0.573237
Cell_0208	FOXO_TR	EAA 1.000000e-01 X + Insulin 10000 ng/ml	1.65025	3.02277	1.38808	1.62175	2.97952	1.45591	1.60796	2.9102	1.65415	1.34654	2.8204	1.84013	1.8084	2.49261	2.11294	1.60817	2.47864	2.09262	2.05574	2.79267	1.63974	1.49173	2.71552	2.48132	2.42816	2.08986	2.71762	1.09954	3.08831	0.913508	1.56882	3.07843	1.13813	1.93166	3.23345	1.24841	1.48424	2.29378	2.45605	1.27129	2.66225	1.89523	1.64298	2.42097	1.44694	1.11321	2.36637
Cell_0208	AMPKARt2	EAA 1.000000e-01 X + Insulin 10000 ng/ml	0.545071	0.49799	0.522667	0.58678	0.663338	0.756445	0.618098	0.627906	0.543217	0.387025	0.696588	0.672322	0.644542	0.543725	0.512944	0.389853	0.652488	0.687083	0.697395	0.795371	0.606869	0.578869	0.524752	0.713729	0.710261	0.445041	0.597833	0.632781	0.639695	0.595583	0.597681	0.580736	0.65711	0.699365	0.63914	0.622622	0.631949	0.619954	0.723918	0.554348	0.66565	0.659929	0.47581	0.692999	0.411714	0.566564	0.703989
Cell_0209	TFEB_TR	EAA 1.000000e-01 X + Insulin 10000 ng/ml	1.21075	2.02541	1.79256	1.79651	1.59928	0.604487	1.1783	1.18505	0.865307	2.48466	1.17031	0.758491	1.53552	1.90438	1.25164	1.83463	1.14518	0.897844	1.12822	2.01311	1.11629	1.04504	1.67658	1.1146	1.55388	0.937137	0.590314	1.00188	1.07371	0.853248	2.91034	1.26794	0.548639	1.33997	1.32032	1.05967	0.976257	0.645791	1.72487	1.07674	0.881256	0.826559	1.30527	1.02438	1.90389	1.40595	0.595515
Cell_0209	FOXO_TR	EAA 1.000000e-01 X + Insulin 10000 ng/ml	1.67703	3.10241	1.41144	1.63941	3.01854	1.52604	1.65603	2.90794	1.67736	1.34657	2.96052	1.8513	1.86495	2.45031	2.20477	1.52671	2.53647	2.00533	2.06548	2.77929	1.6267	1.48708	2.97397	2.43777	2.48337	2.08703	2.6899	1.05557	3.26329	0.933545	1.58256	3.13572	1.13424	1.91906	3.42873	1.25502	1.49173	2.38652	2.29438	1.37219	2.62214	1.82633	1.63727	2.34713	1.38341	1.19493	2.45193
Cell_0209	AMPKARt2	EAA 1.000000e-01 X + Insulin 10000 ng/ml	0.542868	0.494098	0.511214	0.583854	0.67041	0.751438	0.634252	0.619458	0.562814	0.370155	0.704776	0.67482	0.648062	0.559481	0.508351	0.38536	0.646866	0.690567	0.685979	0.787295	0.619696	0.577505	0.519166	0.721167	0.7121	0.466383	0.59827	0.624102	0.653668	0.597764	0.599415	0.590902	0.643688	0.709104	0.640905	0.599693	0.626961	0.618682	0.643526	0.550987	0.661138	0.659564	0.47186	0.685996	0.403417	0.570896	0.721303
Cell_0210	TFEB_TR	EAA 1.000000e-01 X + Insulin 10000 ng/ml	1.21777	1.95525	1.64351	1.63236	1.54082	0.59782	1.24197	1.42945	0.864939	2.44584	0.885709	0.772348	1.81815	2.10261	1.28546	1.69786	1.13282	0.859996	1.12759	1.71578	1.11937	1.06917	1.73115	0.969091	1.56333	1.24139	0.613545	1.04025	1.11362	0.872472	2.69513	1.22348	0.556402	1.16702	1.26304	1.0944	1.01469	0.645886	1.64861	1.10762	0.838088	0.980376	1.3285	1.00872	1.96184	1.65237	0.656867
Cell_0210	FOXO_TR	EAA 1.000000e-01 X + Insulin 10000 ng/ml	1.73095	3.14945	1.43532	1.59846	2.92284	1.57907	1.59672	2.92334	1.68312	1.3729	2.90132	1.8631	1.77733	2.54825	2.1589	1.41743	2.61977	1.90512	2.00579	2.69459	1.64776	1.46394	3.13845	2.45857	2.43525	2.10747	2.73163	1.05681	3.25397	0.937271	1.55696	3.09708	1.12751	1.9341	3.5256	1.24935	1.51631	2.41737	2.34607	1.34517	2.63488	1.75118	1.77408	2.32575	1.33176	1.5599	2.45971
Cell_0210	AMPKARt2	EAA 1.000000e-01 X + Insulin 10000 ng/ml	0.537998	0.484001	0.512591	0.575049	0.6642	0.752866	0.639616	0.617681	0.570444	0.379336	0.716832	0.664943	0.643459	0.561917	0.532326	0.381742	0.63709	0.680438	0.685764	0.787973	0.626253	0.584423	0.519628	0.727795	0.711105	0.477115	0.611404	0.619242	0.647433	0.596471	0.595836	0.586243	0.64067	0.707028	0.658552	0.596684	0.628226	0.617193	0.577574	0.538978	0.661536	0.668123	0.482678	0.69046	0.428013	0.584689	0.718702
Cell_0211	TFEB_TR	EAA 1.000000e-01 X + Insulin 10000 ng/ml	1.22434	1.83164	1.6202	1.85241	1.4884	0.60903	1.15347	1.55255	0.826705	2.52273	1.66659	0.759406	2.06392	1.98136	1.26904	1.65292	1.20162	0.957995	1.19837	1.75859	1.10245	1.10218	1.74118	1.04901	1.6341	1.21938	0.672258	1.19737	0.99807	0.889275	2.96984	1.28703	0.583776	1.23857	1.19778	1.00232	1.01691	0.652465	1.76317	1.09535	0.821686	1.11707	1.43221	1.01082	1.99856	1.74872	0.670453
Cell_0211	FOXO_TR	EAA 1.000000e-01 X + Insulin 10000 ng/ml	1.81128	3.0595	1.45923	1.55419	2.74228	1.58916	1.53922	3.00589	1.70765	1.38787	2.78878	1.86463	1.75633	2.54815	2.13868	1.31512	2.62886	1.92919	1.94453	2.6453	1.64728	1.41104	3.22522	2.50236	2.39406	2.05644	2.67299	1.06659	3.06082	0.9392	1.61082	3.09474	1.13671	1.91178	3.47855	1.25176	1.40946	2.33334	2.16791	1.25209	2.63042	1.71286	2.21975	2.43189	1.29529	1.91154	2.45406
Cell_0211	AMPKARt2	EAA 1.000000e-01 X + Insulin 10000 ng/ml	0.527106	0.478361	0.522578	0.57677	0.646459	0.757827	0.63297	0.611906	0.556671	0.384242	0.715974	0.666463	0.63907	0.542357	0.54322	0.386443	0.641768	0.675759	0.701785	0.796493	0.632763	0.58724	0.523868	0.717456	0.710256	0.461626	0.596685	0.614763	0.642366	0.588111	0.593751	0.583817	0.654849	0.712123	0.666616	0.614732	0.636571	0.620588	0.571995	0.528193	0.665651	0.673372	0.492809	0.699037	0.426446	0.595369	0.715913
Cell_0212	TFEB_TR	EAA 1.000000e-01 X + Insulin 10000 ng/ml	1.22772	1.76272	2.01847	2.02699	1.44596	0.586717	1.23506	1.30535	0.879987	2.52558	1.72232	0.748723	2.68355	1.70322	1.32324	1.69596	1.24289	0.873472	1.23099	2.09185	1.11537	1.20634	1.70208	1.11208	1.50469	0.990655	0.753163	1.38382	1.06405	0.928166	3.41572	1.31603	0.652397	1.38253	1.39827	0.944757	1.02488	0.620486	1.9601	1.02086	0.81577	1.05406	1.51233	1.09767	2.1398	1.7694	0.649921
Cell_0212	FOXO_TR	EAA 1.000000e-01 X + Insulin 10000 ng/ml	1.91786	2.89942	1.48738	1.59897	2.68098	1.53145	1.64123	2.98456	1.72068	1.38859	2.76895	1.87665	1.89663	2.47748	2.27993	1.26806	2.63669	2.01099	1.91937	2.71169	1.59153	1.36263	3.13209	2.52766	2.40753	1.97607	2.57919	1.06762	2.97941	0.961115	1.61071	3.11684	1.16224	1.80318	3.48269	1.26133	1.67509	2.31277	2.0925	1.23467	2.55659	1.68219	2.53593	2.44614	1.27013	2.02474	2.58392
Cell_0212	AMPKARt2	EAA 1.000000e-01 X + Insulin 10000 ng/ml	0.519203	0.476333	0.520604	0.590277	0.646922	0.763038	0.622549	0.607045	0.553742	0.381146	0.715482	0.675517	0.645309	0.538753	0.529632	0.370248	0.65036	0.679522	0.697222	0.798952	0.631075	0.580468	0.517878	0.700846	0.707805	0.460093	0.574657	0.615841	0.654649	0.576206	0.599309	0.59131	0.663054	0.723377	0.668887	0.618708	0.644808	0.620823	0.595561	0.543795	0.670619	0.676087	0.477667	0.701337	0.407311	0.589088	0.728171
Cell_0213	TFEB_TR	EAA 1.000000e-01 X + Insulin 10000 ng/ml	1.26174	1.77998	2.08909	1.83764	1.42536	0.550557	1.41023	1.15579	0.91834	2.43844	1.09339	0.744854	2.93951	2.11595	1.30491	1.73504	1.20863	0.773414	1.17374	2.12671	1.02084	1.22222	1.69443	1.09602	1.36965	1.0529	0.860549	1.29063	1.24346	0.974536	2.67018	1.33123	0.74558	1.31083	1.48654	0.999041	1.14538	0.574027	1.90892	1.003	0.80947	1.00509	1.51571	0.970747	2.12731	1.85694	1.86565
Cell_0213	FOXO_TR	EAA 1.000000e-01 X + Insulin 10000 ng/ml	2.14219	2.86278	1.56189	1.63839	2.72731	1.48496	1.83301	2.80296	1.73256	1.40126	2.82286	1.94683	1.91111	2.48553	2.33668	1.24772	2.59198	2.07861	1.93561	2.76341	1.54125	1.35075	2.99899	2.51503	2.44446	1.93427	2.54063	1.05936	2.97385	0.976617	1.45649	3.0868	1.19572	1.94639	3.44842	1.26363	2.56514	2.40898	1.9885	1.21137	2.50232	1.65176	2.54978	2.33212	1.24615	2.03627	1.13569
Cell_0213	AMPKARt2	EAA 1.000000e-01 X + Insulin 10000 ng/ml	0.528392	0.491234	0.520145	0.588899	0.665699	0.76717	0.62093	0.614133	0.559776	0.388608	0.716939	0.674225	0.650892	0.549487	0.522279	0.341577	0.654141	0.670865	0.676338	0.791868	0.621258	0.565972	0.511826	0.697896	0.706006	0.470717	0.589092	0.618295	0.648093	0.567426	0.607385	0.585976	0.656839	0.712488	0.664336	0.601667	0.652646	0.616449	0.597034	0.566541	0.664161	0.67416	0.463047	0.69234	0.409853	0.574337	0.540741
Cell_0214	TFEB_TR	EAA 1.000000e-01 X + Insulin 10000 ng/ml	1.381	1.8077	1.8046	1.66059	1.39486	0.563217	1.37837	1.19382	0.868722	2.40481	1.36579	0.753599	2.27655	2.48513	1.26891	1.73755	1.23245	0.848818	1.12335	1.89056	1.03768	1.15794	1.7362	1.19687	1.38184	1.16488	1.04817	0.91566	1.19071	1.01406	1.97337	1.49258	0.787184	1.17931	1.25487	1.05924	1.28169	0.612482	1.8536	1.00361	0.821587	1.14189	1.50588	1.31937	1.88056	1.93166	1.8137
Cell_0214	FOXO_TR	EAA 1.000000e-01 X + Insulin 10000 ng/ml	2.47944	2.90383	1.64795	1.5991	2.70994	1.52957	1.90972	2.67542	1.78406	1.42087	2.93829	2.03365	1.79329	2.48816	2.21521	1.22735	2.50196	2.1387	1.98022	2.66609	1.5002	1.37019	3.00884	2.52774	2.46534	1.89498	2.52044	0.992599	2.87908	0.969629	1.66599	3.07051	1.21786	2.35857	3.3424	1.26779	3.16432	2.53735	1.79054	1.17507	2.51167	1.65243	2.55658	2.64596	1.19992	2.03938	1.15227
Cell_0214	AMPKARt2	EAA 1.000000e-01 X + Insulin 10000 ng/ml	0.537404	0.508189	0.51343	0.580518	0.677848	0.763539	0.633022	0.617219	0.562069	0.388123	0.713966	0.662018	0.646034	0.534309	0.521875	0.341562	0.64928	0.651293	0.678519	0.782804	0.619304	0.558505	0.52057	0.704525	0.715426	0.459644	0.613489	0.614504	0.632246	0.559244	0.617545	0.566226	0.650364	0.69753	0.659009	0.597953	0.66244	0.617584	0.592816	0.576609	0.660203	0.667305	0.467424	0.612747	0.419552	0.566158	0.526214
Cell_0215	TFEB_TR	EAA 1.000000e-01 X + Insulin 10000 ng/ml	1.53456	1.80292	1.70376	1.75531	1.3198	0.613047	1.34168	1.25151	0.844159	2.40579	2.2736	0.779376	1.802	1.98095	1.36835	1.69923	1.27451	0.894254	1.09042	1.80002	1.27202	1.0535	1.74673	1.29865	1.43451	1.08597	1.27412	0.874059	1.16753	1.06918	2.49995	1.66317	0.796395	1.23966	1.07303	1.14527	1.27172	0.665263	1.88899	0.968396	0.952651	1.12089	1.47349	1.25755	1.76969	2.04166	1.85694
Cell_0215	FOXO_TR	EAA 1.000000e-01 X + Insulin 10000 ng/ml	2.63704	2.89069	1.63591	1.57065	2.61052	1.61551	1.80251	2.68983	1.76867	1.44238	2.98076	2.07494	1.75242	2.44001	2.20762	1.24287	2.4872	2.17047	2.02383	2.59146	1.48763	1.33773	3.07388	2.55367	2.42667	1.92302	2.53045	1.02483	2.72329	0.964559	2.47233	3.08101	1.21193	2.50454	3.37239	1.27946	3.07365	2.59172	1.74289	1.22388	2.12818	1.61474	2.5336	2.41603	1.15231	2.00711	1.14479
Cell_0215	AMPKARt2	EAA 1.000000e-01 X + Insulin 10000 ng/ml	0.52504	0.497429	0.494746	0.590919	0.673863	0.757578	0.638765	0.621273	0.561048	0.375028	0.714594	0.643651	0.636726	0.519107	0.525142	0.357147	0.638935	0.64644	0.696368	0.780802	0.628539	0.567836	0.524983	0.709691	0.720187	0.448727	0.610959	0.614972	0.639894	0.546304	0.629095	0.555818	0.654136	0.710385	0.661928	0.612295	0.6651	0.621875	0.599476	0.577526	0.651289	0.664989	0.472862	0.585634	0.426135	0.557755	0.547389
Cell_0216	TFEB_TR	EAA 1.000000e-01 X + Insulin 10000 ng/ml	1.61603	1.78476	1.81695	1.89002	1.31165	0.648792	1.42871	1.34499	0.770286	2.37357	2.60335	0.813301	1.83511	1.75328	1.32895	1.6729	1.24123	0.930566	1.04659	1.93892	1.3095	1.03288	1.72065	1.29125	1.39274	1.06708	1.41082	1.22509	1.37249	1.12532	2.92661	1.64984	0.832123	1.31916	1.07595	1.17926	1.21217	1.70876	1.72599	1.0005	0.934593	0.839721	1.4146	1.28528	1.88467	2.14063	1.92219
Cell_0216	FOXO_TR	EAA 1.000000e-01 X + Insulin 10000 ng/ml	2.43984	2.85918	1.62626	1.59099	2.5867	1.64959	1.68019	2.73218	1.64631	1.43738	2.9166	2.08882	1.74239	2.41779	2.37627	1.26707	2.5063	2.14292	1.99895	2.66728	1.55729	1.31211	3.04157	2.50234	2.49299	2.03784	2.55079	1.38305	2.65698	0.967637	3.13398	3.04172	1.20861	2.41448	3.4506	1.30313	3.01676	1.71267	1.76832	1.26521	2.21935	1.52681	2.41987	2.50694	1.14901	1.96746	1.13002
Cell_0216	AMPKARt2	EAA 1.000000e-01 X + Insulin 10000 ng/ml	0.502566	0.475042	0.491162	0.599516	0.668182	0.761117	0.62907	0.634105	0.552165	0.375999	0.717739	0.630243	0.635671	0.535401	0.543057	0.369602	0.639303	0.669166	0.70291	0.78222	0.633467	0.576095	0.515459	0.709624	0.711919	0.470181	0.596473	0.627256	0.638715	0.539647	0.635931	0.561784	0.659481	0.722027	0.662301	0.611211	0.653114	0.579852	0.600752	0.567252	0.636696	0.665492	0.479108	0.569643	0.428921	0.549326	0.551655
Cell_0217	TFEB_TR	EAA 1.000000e-01 X + Insulin 10000 ng/ml	1.64828	1.77045	2.15965	1.92664	1.39006	0.62137	1.32394	1.30314	0.651739	2.40749	2.24113	0.88153	1.56981	2.14899	1.15589	1.68725	1.19252	1.03579	1.04607	2.01874	1.08852	1.08568	1.68594	1.24616	1.40622	1.15219	1.44896	1.25193	1.45666	1.14523	2.69251	1.49238	0.852195	1.22425	1.13392	1.02509	1.21851	2.14821	1.47723	1.06532	0.940832	0.811462	1.40072	1.2323	1.99514	2.01538	1.9258
Cell_0217	FOXO_TR	EAA 1.000000e-01 X + Insulin 10000 ng/ml	2.14391	2.87654	1.73563	1.61539	2.68203	1.59265	1.63564	2.68798	1.61218	1.4313	2.87006	2.10123	1.7099	2.4249	2.42793	1.23526	2.47679	2.1051	1.9446	2.6775	1.60171	1.56649	2.93018	2.44346	2.77447	2.08998	2.49497	1.81487	2.78766	0.96531	3.20073	2.99073	1.21689	2.50945	1.54174	1.33113	3.1263	1.68444	1.74291	1.23262	2.29438	1.50611	2.41697	2.68975	1.17246	1.95025	1.13313
Cell_0217	AMPKARt2	EAA 1.000000e-01 X + Insulin 10000 ng/ml	0.481818	0.473654	0.499053	0.593967	0.669559	0.757881	0.62862	0.626608	0.546034	0.385251	0.714111	0.639727	0.644163	0.538383	0.550594	0.389994	0.644039	0.693159	0.697355	0.783229	0.633484	0.576956	0.516389	0.702488	0.724159	0.491174	0.588305	0.637886	0.62332	0.552998	0.638018	0.572941	0.655241	0.704167	0.611184	0.599547	0.638057	0.59485	0.597902	0.559728	0.637522	0.66606	0.487568	0.570728	0.425494	0.560649	0.534901
Cell_0218	TFEB_TR	EAA 1.000000e-01 X + Insulin 10000 ng/ml	1.67313	1.77695	2.29019	2.01479	1.39914	0.573927	1.04644	1.12787	0.753941	2.5143	1.58462	1.00617	1.37569	2.04444	1.24487	1.7387	1.13982	1.00445	1.1136	1.86842	1.02066	1.0219	1.60739	1.13594	1.55979	1.15274	1.46009	1.03782	1.46989	1.15732	2.55402	0.667627	0.860685	1.16703	1.02361	0.887875	1.22793	2.11161	1.48722	1.0303	0.943285	1.02648	1.42336	1.12354	2.00692	1.85197	1.73826
Cell_0218	FOXO_TR	EAA 1.000000e-01 X + Insulin 10000 ng/ml	1.96322	2.9255	1.76281	1.58673	2.69794	1.51908	1.58712	2.59108	1.72057	1.48309	2.84317	2.08307	1.67191	2.44948	2.29594	1.26072	2.42247	2.09747	2.08346	2.57394	1.54136	2.06235	2.81409	2.42851	3.03664	2.06838	2.40047	1.93717	2.94731	0.962743	3.15209	2.13987	1.2148	2.54674	1.53429	1.34573	3.02997	1.69682	1.75662	1.20831	2.31716	1.50659	2.46003	2.72682	1.16804	1.95877	1.14309
Cell_0218	AMPKARt2	EAA 1.000000e-01 X + Insulin 10000 ng/ml	0.467011	0.489257	0.499897	0.597296	0.668258	0.728391	0.645903	0.611019	0.555518	0.381994	0.713198	0.655238	0.648049	0.517724	0.532345	0.407556	0.639623	0.688092	0.685268	0.789181	0.640331	0.588042	0.528244	0.695535	0.74798	0.484329	0.586812	0.63707	0.637098	0.569141	0.636361	0.576027	0.654455	0.690771	0.608249	0.60748	0.631135	0.598991	0.600439	0.568081	0.637815	0.666819	0.48436	0.583736	0.436357	0.581974	0.54032
Cell_0219	TFEB_TR	EAA 1.000000e-01 X + Insulin 10000 ng/ml	1.63228	1.8015	1.90234	2.09682	1.34745	0.655032	1.03418	1.15779	0.998114	2.48808	1.06893	1.13536	1.69399	1.86428	1.44359	1.82876	1.11677	0.922579	1.22097	1.77673	1.1032	1.12146	1.49912	1.13515	1.59696	1.07428	1.45491	1.23519	1.10924	1.19127	2.60178	0.61567	0.896808	1.24372	0.997621	0.987767	1.24788	1.88655	1.75035	0.957486	0.987281	0.975278	1.43206	1.2876	1.93841	1.87221	1.37091
Cell_0219	FOXO_TR	EAA 1.000000e-01 X + Insulin 10000 ng/ml	1.76677	2.95972	1.67451	1.48941	2.58633	1.52944	1.58416	2.60815	1.7873	1.47559	2.81287	2.04219	1.61763	2.48015	2.20362	1.48151	2.38328	2.03706	2.4477	2.5519	1.51797	2.41905	2.68621	2.36159	3.22583	2.05187	2.34567	1.88061	2.6863	0.964365	3.2847	2.3346	1.22676	2.33103	1.52288	1.3603	2.96073	1.75452	1.83519	1.18212	2.30613	1.43216	2.41081	2.72184	1.14602	1.97351	1.15023
Cell_0219	AMPKARt2	EAA 1.000000e-01 X + Insulin 10000 ng/ml	0.464686	0.495486	0.501386	0.602636	0.663755	0.696562	0.654729	0.621183	0.570703	0.374334	0.721373	0.647064	0.649457	0.521654	0.522303	0.427338	0.638276	0.673095	0.683693	0.795588	0.646983	0.598982	0.528516	0.698086	0.738707	0.479938	0.587762	0.630853	0.627184	0.560892	0.629109	0.575781	0.668315	0.706489	0.630289	0.614943	0.628075	0.597155	0.606005	0.571065	0.631293	0.664883	0.477716	0.586565	0.450559	0.581698	0.545563
Cell_0220	TFEB_TR	EAA 1.000000e-01 X + Insulin 10000 ng/ml	1.55483	1.83156	2.12207	1.91863	1.31233	0.82288	1.26773	1.23838	1.14574	2.33111	1.05988	1.24973	1.5928	2.27312	1.41862	1.85989	1.21795	1.1138	1.32095	1.87586	1.01217	1.51864	1.45473	1.28843	1.56386	0.963132	1.43185	1.51814	1.20273	1.21202	2.55293	0.689156	0.905952	1.21293	1.06218	1.14476	1.307	2.06433	1.92813	0.928879	1.03692	0.870388	1.442	1.58943	1.88858	1.86762	1.23938
Cell_0220	FOXO_TR	EAA 1.000000e-01 X + Insulin 10000 ng/ml	1.57294	2.99043	1.72748	1.46984	2.5739	1.56249	1.6533	2.72067	1.77768	1.45804	2.82928	2.07233	1.75834	2.45014	2.22938	1.75142	2.38764	1.91423	2.75283	2.55171	1.55796	2.57224	2.6071	2.28413	3.42522	2.34561	2.29598	1.88619	2.69203	0.961009	3.30861	2.47715	1.25177	2.26822	1.51327	1.38427	3.08689	1.75911	1.90107	1.13918	2.31506	1.38388	2.4058	2.76103	1.14373	1.97179	1.16228
Cell_0220	AMPKARt2	EAA 1.000000e-01 X + Insulin 10000 ng/ml	0.464004	0.491676	0.499858	0.60232	0.664885	0.699123	0.644247	0.625238	0.582952	0.383761	0.724741	0.634096	0.663732	0.536371	0.528187	0.467774	0.64132	0.671731	0.705714	0.793788	0.648891	0.593856	0.526859	0.703061	0.718273	0.685675	0.585314	0.622212	0.632613	0.541651	0.619578	0.569942	0.673649	0.720086	0.64414	0.601803	0.630294	0.595194	0.611187	0.559885	0.632234	0.668707	0.483265	0.577737	0.442676	0.564033	0.527179
Cell_0221	TFEB_TR	EAA 1.000000e-01 X + Insulin 10000 ng/ml	1.54007	1.87152	2.83802	1.71713	1.23714	0.925941	1.2975	1.12663	1.30813	2.35844	1.38903	1.39984	0.993896	2.30702	1.385	1.75479	1.32886	1.28688	1.28525	1.83304	0.832932	1.62575	1.02542	1.17708	1.65357	0.902081	1.40343	1.35937	1.18248	1.20124	2.35524	0.7487	0.910076	1.04892	1.11315	1.13414	1.30887	2.43393	1.77161	0.905402	0.992051	1.06969	1.45063	1.58209	1.88364	1.72053	1.45055
Cell_0221	FOXO_TR	EAA 1.000000e-01 X + Insulin 10000 ng/ml	1.59141	3.06026	1.8386	1.55623	2.64929	1.51701	1.65777	2.70541	1.78887	1.84058	2.83103	2.15175	2.16942	2.36907	2.26968	1.90571	2.40317	1.873	2.8209	2.47868	1.52921	2.67534	1.38029	2.30696	3.42105	2.39104	2.21102	1.89258	2.66448	0.9539	3.11463	2.54242	1.27792	2.37027	1.53686	1.40128	3.09197	1.68586	1.91322	1.15208	2.3128	1.38095	2.43263	2.80119	1.13885	1.9924	1.16815
Cell_0221	AMPKARt2	EAA 1.000000e-01 X + Insulin 10000 ng/ml	0.460565	0.498784	0.488995	0.613756	0.672286	0.72916	0.633303	0.61137	0.581296	0.41868	0.719628	0.640839	0.682139	0.523768	0.528448	0.495093	0.638812	0.661454	0.717977	0.789408	0.656438	0.589435	0.415944	0.702152	0.719945	0.68268	0.586242	0.61548	0.626841	0.542887	0.617654	0.574311	0.661265	0.713294	0.626895	0.599273	0.642796	0.586115	0.61431	0.54827	0.639124	0.674275	0.492596	0.575943	0.448221	0.559403	0.514243
Cell_0222	TFEB_TR	EAA 1.000000e-01 X + Insulin 10000 ng/ml	1.55241	1.88246	2.44451	1.99308	1.14789	1.01269	1.15933	1.16518	1.47475	2.64109	1.63092	1.58409	1.37399	1.92695	1.47851	1.66098	1.34447	1.0506	1.10466	1.16539	0.899927	1.45198	1.03439	1.03698	1.65572	1.18599	1.35314	1.12118	1.22338	1.19345	2.29203	0.70944	0.96191	0.992646	1.05679	1.00462	1.26439	2.37372	1.54938	0.908345	0.964694	1.17536	1.43612	1.41345	1.78762	1.60962	1.51736
Cell_0222	FOXO_TR	EAA 1.000000e-01 X + Insulin 10000 ng/ml	1.63297	3.12432	1.84348	1.58969	2.60586	1.48536	1.68461	2.60923	1.8107	2.53789	2.75402	2.14235	2.45337	2.32343	2.28864	2.03996	2.38157	1.92239	2.71584	1.89804	1.47405	2.64422	1.42285	2.37053	3.24431	2.35607	2.094	1.85506	2.76635	0.954225	2.94294	2.54226	1.33398	2.27626	1.56705	1.41956	2.94724	1.69981	1.91645	1.19	2.27242	1.32204	2.37844	2.82174	1.11901	2.03944	1.16767
Cell_0222	AMPKARt2	EAA 1.000000e-01 X + Insulin 10000 ng/ml	0.467394	0.505569	0.483116	0.614802	0.68123	0.745434	0.632562	0.621558	0.55845	0.447044	0.715729	0.65126	0.690992	0.509702	0.526522	0.490215	0.636863	0.640558	0.699974	0.678302	0.665646	0.586367	0.426553	0.699839	0.72423	0.670627	0.594933	0.618909	0.622021	0.557018	0.62477	0.58417	0.660613	0.709084	0.61765	0.606991	0.651594	0.57978	0.614768	0.539969	0.642476	0.669115	0.489734	0.578291	0.469112	0.573094	0.52377
Cell_0223	TFEB_TR	EAA 1.000000e-01 X + Insulin 10000 ng/ml	1.5442	1.83234	2.2241	2.52592	1.13835	1.09766	1.17767	1.36591	1.52252	2.82494	1.58846	1.71941	2.65371	2.06027	1.44036	1.73178	0.529047	0.926218	1.02023	1.21335	1.13437	1.50924	1.08287	1.31783	1.56244	1.30136	1.28561	1.10679	1.36265	1.20347	2.52878	0.684932	0.958316	1.03015	1.01028	0.931524	1.27324	2.07773	1.6028	0.974693	1.03063	1.02643	1.43558	1.34745	1.7079	1.67724	1.55275
Cell_0223	FOXO_TR	EAA 1.000000e-01 X + Insulin 10000 ng/ml	1.56925	3.11106	1.90634	1.82958	2.51689	1.57643	1.84094	2.69249	1.83085	2.90714	2.73475	2.1025	2.46162	2.30577	2.31885	2.17405	1.69853	1.93309	2.57453	1.91974	1.48132	2.48832	1.44695	2.37032	3.16424	2.34642	1.9701	1.82741	2.93673	0.962814	2.89523	2.48006	1.35534	2.08217	1.54692	1.45501	2.89293	1.83072	1.95238	1.17094	2.26574	1.26204	2.37804	2.86115	1.12903	2.04444	1.17548
Cell_0223	AMPKARt2	EAA 1.000000e-01 X + Insulin 10000 ng/ml	0.47554	0.495556	0.483987	0.59141	0.679547	0.736768	0.63968	0.638064	0.543333	0.429031	0.712823	0.648754	0.693362	0.517839	0.526033	0.481444	0.606214	0.644005	0.69159	0.672616	0.668352	0.57393	0.444944	0.697223	0.727578	0.665548	0.595859	0.62582	0.630508	0.559422	0.619971	0.580203	0.672391	0.713049	0.635382	0.59762	0.643981	0.591596	0.612114	0.54263	0.644433	0.674736	0.47921	0.585847	0.452994	0.57689	0.537888
Cell_0224	TFEB_TR	EAA 1.000000e-01 X + Insulin 10000 ng/ml	1.55286	1.78436	3.86644	2.75567	1.18159	1.16781	1.18918	1.30726	1.63758	2.73864	1.36441	1.7061	3.02052	1.44969	1.32634	1.93726	0.532424	1.2195	1.07866	1.40905	1.20666	1.52857	1.05635	1.357	1.55812	1.06875	1.24744	1.13954	1.36902	1.19892	2.52816	0.711881	0.884854	0.92652	1.11848	0.964788	1.28595	2.0926	1.70055	1.02236	1.04661	0.999886	1.46829	1.20836	1.79755	1.83381	2.00183
Cell_0224	FOXO_TR	EAA 1.000000e-01 X + Insulin 10000 ng/ml	1.93072	3.0304	1.99548	2.5959	2.50464	1.6793	1.89709	2.87064	1.84463	2.85768	2.86839	2.13571	2.43985	2.33027	2.33541	2.21444	1.80976	1.87325	2.5112	1.94533	1.5023	2.4434	1.45062	2.2882	3.01889	2.34287	1.9134	1.78691	3.0001	0.963653	2.92349	2.36552	1.30073	2.02568	1.54878	1.49536	2.89857	1.88738	2.00321	1.12136	2.28337	1.26223	2.44855	2.95457	1.15866	2.01599	1.17337
Cell_0224	AMPKARt2	EAA 1.000000e-01 X + Insulin 10000 ng/ml	0.484429	0.495808	0.484984	0.590034	0.668893	0.73379	0.655977	0.623609	0.554505	0.392626	0.70888	0.636348	0.687261	0.648082	0.520937	0.474271	0.621679	0.661317	0.70443	0.685053	0.667144	0.571587	0.453445	0.693437	0.741592	0.66655	0.589532	0.633745	0.628926	0.555497	0.60016	0.575088	0.66823	0.709359	0.646123	0.599107	0.634611	0.597819	0.607378	0.557712	0.647816	0.694844	0.482745	0.597947	0.438857	0.559786	0.530327
Cell_0225	TFEB_TR	EAA 1.000000e-01 X + Insulin 10000 ng/ml	1.58724	1.76588	5.00644	2.66483	1.16687	1.31943	1.09613	1.10875	1.74791	2.59213	0.795531	1.60662	2.33338	1.38567	1.46068	2.1775	0.529601	1.27435	1.04238	1.36682	1.13155	1.34691	0.99976	0.992402	1.47261	1.01194	1.23668	1.16336	1.25972	1.16978	2.19177	0.725898	0.860492	0.826428	1.21598	0.982516	1.24859	2.17144	1.64118	0.995984	1.01232	1.02809	1.47966	1.11381	1.79304	1.87385	2.24877
Cell_0225	FOXO_TR	EAA 1.000000e-01 X + Insulin 10000 ng/ml	2.81835	2.91317	1.94475	3.35447	2.50995	1.66933	1.83363	2.87831	1.78126	2.76417	1.33737	2.11899	2.40265	2.32666	2.31616	2.29378	1.84932	1.79324	2.47767	1.95609	1.51046	2.4534	1.45277	2.18415	2.78352	2.27132	1.91456	1.74197	3.01707	0.951046	3.0103	2.28203	1.29103	2.02443	1.63124	1.51163	2.80688	1.84438	2.09312	1.09468	2.25548	1.26753	2.39246	3.00722	1.13166	2.00835	1.15658
Cell_0225	AMPKARt2	EAA 1.000000e-01 X + Insulin 10000 ng/ml	0.516745	0.511976	0.487598	0.612189	0.67304	0.740205	0.668386	0.612767	0.561666	0.380632	0.444119	0.627058	0.678222	0.645593	0.51611	0.47096	0.632096	0.663617	0.700651	0.684899	0.659293	0.579749	0.442043	0.695156	0.74889	0.658649	0.595653	0.64611	0.611872	0.557735	0.601864	0.584608	0.65697	0.704552	0.638332	0.620267	0.637402	0.589867	0.604297	0.563692	0.655196	0.690528	0.496203	0.5844	0.469762	0.551802	0.508436
Cell_0226	TFEB_TR	EAA 1.000000e-01 X + Insulin 10000 ng/ml	1.70342	1.72082	4.08176	2.45559	1.03838	1.37623	1.15566	0.733532	1.5783	2.49481	0.688547	1.6233	1.7729	1.41356	1.72051	2.28314	0.527715	1.09334	0.92549	1.25159	1.10036	1.35897	1.04962	1.09469	1.29376	1.20282	1.21006	1.1878	1.27642	1.15711	2.10059	0.723656	0.8471	1.02746	1.13271	0.964081	1.21049	1.92681	1.7091	0.95586	1.03291	0.98445	1.45021	1.30927	1.64081	1.84136	2.00884
Cell_0226	FOXO_TR	EAA 1.000000e-01 X + Insulin 10000 ng/ml	3.46162	2.80315	1.90015	3.5021	2.53024	1.62459	1.88268	1.88527	1.69728	2.67644	1.29935	2.04196	2.31526	2.21308	2.31269	2.50338	1.85395	1.76506	2.38068	1.91217	1.51613	2.30028	1.48452	2.14339	2.87847	2.22577	1.85598	1.78934	2.99359	0.950693	3.01159	2.31767	1.3187	1.94102	1.65668	1.4946	2.63512	1.83529	2.19737	1.09499	2.22888	1.24955	2.28064	2.91956	1.08799	2.00826	1.15894
Cell_0226	AMPKARt2	EAA 1.000000e-01 X + Insulin 10000 ng/ml	0.546054	0.513456	0.486622	0.610723	0.687699	0.734788	0.657806	0.593296	0.550588	0.369396	0.479476	0.631532	0.681844	0.665248	0.512445	0.478269	0.631031	0.666057	0.683148	0.67408	0.647166	0.574521	0.438457	0.699143	0.738186	0.6592	0.605149	0.64302	0.614563	0.558952	0.626174	0.594758	0.658012	0.712343	0.630273	0.612126	0.635006	0.597596	0.602136	0.55417	0.656301	0.665842	0.493983	0.554007	0.473696	0.562882	0.508387
Cell_0227	TFEB_TR	EAA 1.000000e-01 X + Insulin 10000 ng/ml	1.93102	1.68687	3.05013	2.48159	1.58849	1.17624	1.15647	0.788592	1.42397	2.40022	0.714026	1.71125	1.60034	1.24931	1.76036	2.20302	0.530845	1.26416	0.926431	1.50258	1.12576	1.39988	1.10159	1.37923	1.25839	1.27429	1.18293	1.16865	1.37241	1.16883	2.10257	0.731558	0.779863	1.15473	1.05843	0.98527	1.17646	1.8649	1.88411	0.929378	1.07826	1.12607	1.43315	1.46731	1.69378	1.88031	2.17641
Cell_0227	FOXO_TR	EAA 1.000000e-01 X + Insulin 10000 ng/ml	3.57365	2.78834	1.90802	3.40024	2.12897	1.63256	1.87299	1.95497	1.71373	2.55768	1.32196	2.06945	2.28276	2.05608	2.32634	2.65351	1.84815	1.81524	2.32714	1.88822	1.52726	2.11392	1.53905	2.18096	3.17719	2.26755	1.75332	1.89707	2.88613	0.968039	2.85652	2.42998	1.28416	1.83141	1.5939	1.47968	2.54462	1.86707	2.17662	1.09348	2.21031	1.21494	2.31213	2.79518	1.1409	1.99393	1.17392
Cell_0227	AMPKARt2	EAA 1.000000e-01 X + Insulin 10000 ng/ml	0.528351	0.510316	0.482983	0.595706	0.614779	0.734432	0.638713	0.589409	0.548534	0.345502	0.47603	0.639437	0.678952	0.674468	0.511198	0.474325	0.630449	0.672446	0.682373	0.681143	0.645302	0.568286	0.453862	0.69696	0.720137	0.676181	0.596712	0.623683	0.625768	0.556257	0.632421	0.598227	0.660766	0.721276	0.629012	0.586347	0.615084	0.604555	0.599869	0.544607	0.622309	0.66126	0.484305	0.548371	0.449402	0.567121	0.518578
Cell_0228	TFEB_TR	EAA 1.000000e-01 X + Insulin 10000 ng/ml	2.06895	0.465548	2.73391	2.93864	1.52864	1.0067	0.8822	0.783777	1.50308	2.3153	0.776109	1.6931	1.62394	1.22316	1.62824	2.1414	0.531754	1.46279	0.975155	1.83133	1.12772	1.27207	1.07344	1.18833	1.35976	1.16651	1.1618	1.11494	1.36439	1.16968	1.90341	0.747439	0.744652	0.873421	1.10327	0.97193	1.13062	2.18176	1.79965	0.884373	1.1507	1.24264	1.44656	1.51913	1.86565	1.87339	2.51077
Cell_0228	FOXO_TR	EAA 1.000000e-01 X + Insulin 10000 ng/ml	3.52489	1.48487	1.82747	3.50462	1.96749	1.63844	1.62383	1.96049	1.74509	2.52184	1.38677	2.15436	2.21813	1.93774	2.29381	2.61291	1.82138	1.85663	2.36551	1.92405	1.59107	2.05414	1.58638	2.23006	3.18599	2.34506	1.70451	1.86746	2.82459	0.974698	2.79773	2.50805	1.28293	1.7997	1.61319	1.46252	2.63641	1.88649	2.09673	1.0564	2.15075	1.22265	2.4049	2.73331	1.18509	1.9724	1.16271
Cell_0228	AMPKARt2	EAA 1.000000e-01 X + Insulin 10000 ng/ml	0.488847	0.629303	0.481942	0.597166	0.604858	0.748969	0.631707	0.580092	0.559437	0.345187	0.464954	0.639089	0.653124	0.669532	0.519776	0.466038	0.635593	0.665012	0.69109	0.689947	0.645823	0.575562	0.457372	0.698104	0.709915	0.680858	0.58476	0.621904	0.617799	0.559164	0.621383	0.599586	0.658519	0.713363	0.628097	0.59249	0.601849	0.5857	0.60313	0.53999	0.570326	0.674098	0.487517	0.55933	0.472884	0.562015	0.502031
Cell_0229	TFEB_TR	EAA 1.000000e-01 X + Insulin 10000 ng/ml	2.02097	0.465242	2.53251	2.95648	1.68383	1.00705	0.79664	0.802093	1.49392	2.21221	0.777417	1.64093	1.49805	1.59112	1.55273	2.09556	0.530246	1.35033	0.923922	1.82229	1.05944	1.30257	1.10433	1.07118	1.4968	1.02303	1.1021	1.10391	1.31874	1.1706	1.81192	0.758346	0.773195	0.776015	1.07787	0.913957	1.07486	2.12977	1.62819	0.854832	1.31481	1.07263	1.46245	1.72684	1.85753	1.79423	2.20255
Cell_0229	FOXO_TR	EAA 1.000000e-01 X + Insulin 10000 ng/ml	3.42908	1.53499	1.74666	3.54054	1.97886	1.63302	1.43811	1.94986	1.69938	2.55096	1.39144	2.18046	2.06322	1.93545	2.2456	2.43155	1.81247	1.83941	2.33759	1.88999	1.70222	2.02143	1.64055	2.20903	3.08435	2.37006	1.70781	1.70077	2.78824	0.979967	2.91217	2.58479	1.32767	1.76022	1.65634	1.43018	2.7862	1.87098	2.12261	1.00903	2.1391	1.26191	2.43689	2.7053	1.12729	1.96978	1.13382
Cell_0229	AMPKARt2	EAA 1.000000e-01 X + Insulin 10000 ng/ml	0.467025	0.653888	0.475836	0.605663	0.619303	0.743097	0.629291	0.577156	0.558705	0.363084	0.47519	0.635459	0.643175	0.674096	0.52681	0.477337	0.63455	0.660875	0.691232	0.686903	0.622725	0.578305	0.44328	0.704885	0.712749	0.671877	0.588619	0.632463	0.620686	0.564792	0.616443	0.592514	0.655498	0.696061	0.618003	0.612859	0.606682	0.578553	0.607934	0.534117	0.560931	0.67487	0.492027	0.566302	0.489727	0.561694	0.478336
Cell_0230	TFEB_TR	EAA 1.000000e-01 X + Insulin 10000 ng/ml	1.97841	0.472745	2.55948	2.21717	1.84408	1.05728	1.00328	0.815735	1.41836	2.07686	0.76415	1.59448	1.27782	1.66893	1.5426	1.97578	0.533374	1.25988	0.839094	1.63025	1.08856	1.39087	1.18715	1.23592	1.51231	0.970597	1.06126	1.28168	1.31869	1.188	1.81042	0.777224	0.794584	1.05537	1.01529	0.958654	0.992065	1.92363	1.73062	0.889993	1.58423	1.0241	1.49158	1.61496	1.79884	1.822	1.99498
Cell_0230	FOXO_TR	EAA 1.000000e-01 X + Insulin 10000 ng/ml	3.28953	1.53736	1.7508	3.33343	1.9169	1.69388	1.45164	1.94948	1.66973	2.56326	1.33371	2.16165	1.9919	2.00025	2.23886	2.3013	1.82705	1.7978	2.25283	1.82786	1.78589	2.03631	1.69974	2.15048	3.176	2.30551	1.77752	1.62626	2.7008	0.993161	2.97752	2.76878	1.31464	1.6499	1.56356	1.46258	2.85621	1.82527	2.09808	1.00446	2.208	1.21207	2.45434	2.75422	1.30306	2.01419	1.12063
Cell_0230	AMPKARt2	EAA 1.000000e-01 X + Insulin 10000 ng/ml	0.455878	0.656326	0.47305	0.602728	0.615228	0.722196	0.628005	0.592881	0.553043	0.365966	0.484557	0.630205	0.658301	0.676763	0.521479	0.476628	0.626734	0.670682	0.685538	0.690614	0.59282	0.572887	0.437421	0.701815	0.712432	0.665808	0.598727	0.622124	0.628743	0.561909	0.618794	0.584354	0.651896	0.691299	0.604922	0.622237	0.606336	0.593738	0.601129	0.521836	0.579429	0.665465	0.485216	0.562565	0.455245	0.562949	0.475515
Cell_0231	TFEB_TR	EAA 1.000000e-01 X + Insulin 10000 ng/ml	1.99382	0.474441	2.47454	1.96771	1.84974	1.19004	1.01808	0.774676	1.46493	1.99026	0.73947	1.48379	1.69123	1.34813	1.50936	2.01091	0.535006	1.22126	0.820442	1.52201	1.32497	1.33919	1.16927	1.26971	1.27701	1.03173	1.10534	1.44937	1.33933	1.18312	1.83707	0.84028	0.786784	1.03697	1.08394	1.09777	0.964682	2.30849	1.90762	0.929379	1.88053	1.11272	1.54331	1.12262	1.80173	1.90064	2.30968
Cell_0231	FOXO_TR	EAA 1.000000e-01 X + Insulin 10000 ng/ml	3.25391	1.50247	1.75521	3.23464	1.78047	1.77529	1.44544	1.9254	1.6886	2.56057	1.32177	2.09366	2.03389	1.96442	2.22613	2.40164	1.81234	1.74101	2.23561	1.88713	1.80118	2.17344	1.70957	2.17004	3.17252	2.2971	1.90207	1.63769	2.72088	0.983179	2.99352	2.93649	1.35529	1.61056	1.48234	1.4943	2.91492	1.8189	1.99235	1.01249	2.23182	1.30131	2.47278	2.9055	1.90034	2.04932	1.12142
Cell_0231	AMPKARt2	EAA 1.000000e-01 X + Insulin 10000 ng/ml	0.449649	0.660351	0.487278	0.581068	0.593896	0.730212	0.633846	0.610984	0.562049	0.36742	0.484923	0.625872	0.653115	0.669789	0.51845	0.451294	0.617016	0.667166	0.684012	0.703323	0.596864	0.568264	0.445912	0.69668	0.709837	0.658281	0.605474	0.602569	0.602469	0.55936	0.628603	0.585933	0.652348	0.699438	0.601242	0.630188	0.596154	0.596089	0.596252	0.506021	0.558456	0.676133	0.475879	0.536081	0.459938	0.560948	0.482003
Cell_0232	TFEB_TR	EAA 1.000000e-01 X + Insulin 10000 ng/ml	2.01854	0.468372	1.9758	2.29036	1.83349	1.32945	0.82857	0.777466	1.39166	1.9802	0.687886	1.43192	2.04369	1.41104	1.53161	2.15009	0.528061	1.13998	0.852658	1.52291	1.40177	1.44968	1.1243	1.28654	1.07461	1.04458	1.13771	1.20626	1.45115	1.16193	2.09954	0.929838	0.771839	0.77864	1.14777	1.1824	1.09305	2.63329	1.90818	0.898431	2.02277	0.997372	1.57073	1.21584	1.85897	1.83284	2.40102
Cell_0232	FOXO_TR	EAA 1.000000e-01 X + Insulin 10000 ng/ml	3.34698	1.49787	1.76551	3.25362	1.82119	1.80227	1.38805	1.9424	1.70581	2.55553	1.34822	2.05464	2.07396	1.92801	2.19551	2.5494	1.79014	1.70264	2.20171	1.93984	1.77702	2.26293	1.69455	2.18655	2.96514	2.39877	1.98486	1.60389	2.78672	0.982288	3.05134	2.87904	1.41777	1.63843	1.5021	1.40969	2.94318	1.85494	2.16733	0.982048	2.18425	1.79057	2.47706	3.01223	2.4248	2.02218	1.1205
Cell_0232	AMPKARt2	EAA 1.000000e-01 X + Insulin 10000 ng/ml	0.458361	0.668467	0.49623	0.56191	0.593139	0.749487	0.640219	0.615411	0.568653	0.380456	0.495235	0.629603	0.635606	0.668385	0.518691	0.445746	0.613672	0.653083	0.690855	0.712196	0.614871	0.564792	0.456174	0.703688	0.724637	0.654233	0.60712	0.605408	0.587893	0.570279	0.636669	0.579115	0.654707	0.705402	0.602272	0.63171	0.594594	0.586453	0.623994	0.498063	0.521651	0.70524	0.473051	0.518263	0.498941	0.5585	0.489403
Cell_0233	TFEB_TR	EAA 1.000000e-01 X + Insulin 10000 ng/ml	2.13404	0.467184	1.85274	2.1598	1.83246	1.30219	0.748363	0.859039	1.20983	1.99924	0.70414	1.45903	1.47658	1.80835	1.7199	2.21571	0.52529	1.09532	0.888398	1.7631	1.22918	1.63754	1.21854	1.26765	1.15478	0.986603	1.11193	0.887653	1.62146	1.17554	2.22177	1.01284	0.771925	0.833322	1.14199	1.14729	1.23685	2.46345	1.8258	0.851637	2.03246	0.988468	1.56035	1.70474	2.05885	1.64144	2.24186
Cell_0233	FOXO_TR	EAA 1.000000e-01 X + Insulin 10000 ng/ml	3.45459	1.53777	1.77399	3.10662	1.91661	1.85045	1.3402	2.03515	1.74647	2.58007	1.3508	2.12479	2.12189	2.02841	2.23736	2.54614	1.81673	1.69194	2.10468	1.89215	1.78098	2.22027	1.76778	2.10152	2.88342	2.39797	2.01071	1.61133	2.67218	1.00613	3.0656	2.70587	1.37713	1.64919	1.4808	1.50007	2.80011	1.84871	2.55444	0.969948	2.12533	2.19392	2.49238	3.01592	2.52072	2.02085	1.1253
Cell_0233	AMPKARt2	EAA 1.000000e-01 X + Insulin 10000 ng/ml	0.468579	0.660683	0.485624	0.571715	0.602422	0.742616	0.641548	0.614926	0.558084	0.389572	0.504013	0.632782	0.639036	0.676916	0.510087	0.459053	0.625377	0.656882	0.697649	0.703936	0.607804	0.574681	0.445611	0.707568	0.73595	0.655875	0.601504	0.62363	0.618038	0.578599	0.633636	0.566373	0.651706	0.709938	0.602736	0.628703	0.599724	0.576157	0.67052	0.5	0.529438	0.713466	0.476919	0.533951	0.487419	0.563253	0.495819
Cell_0234	TFEB_TR	EAA 1.000000e-01 X + Insulin 10000 ng/ml	2.23006	0.478754	2.06073	1.92007	1.8077	1.2003	0.772798	0.928906	1.22618	2.01675	0.801192	1.39741	1.27089	1.76007	1.84904	2.48963	0.533365	1.03365	0.891229	2.20267	1.21641	1.56701	1.41999	1.05148	1.29769	1.02803	1.09339	1.04975	1.68382	1.19097	1.98553	1.0984	0.80764	1.01355	1.191	1.0833	1.24264	2.41082	1.78895	0.884023	2.09612	1.16951	1.55403	1.82691	2.20498	0.61108	2.07783
Cell_0234	FOXO_TR	EAA 1.000000e-01 X + Insulin 10000 ng/ml	3.38194	1.57111	1.71947	3.02821	1.86381	1.91281	1.25316	2.06839	1.76807	2.65732	1.36353	2.14271	2.1691	2.08625	2.34355	2.54423	1.88127	1.63056	2.07379	1.88612	1.80862	2.19784	1.93504	2.11292	2.92396	2.27616	1.92949	1.66225	2.55851	0.977433	3.03261	2.64452	1.64324	1.70304	1.47037	1.93057	2.64264	1.82646	2.68427	1.02218	2.07818	2.10576	2.48699	3.06506	2.54414	1.41954	1.13843
Cell_0234	AMPKARt2	EAA 1.000000e-01 X + Insulin 10000 ng/ml	0.460157	0.651891	0.479582	0.58945	0.601067	0.734195	0.639549	0.611816	0.553858	0.396314	0.493991	0.627093	0.641114	0.68879	0.511342	0.45414	0.630963	0.663336	0.697304	0.676611	0.597386	0.594515	0.410289	0.703453	0.725362	0.654949	0.597705	0.628979	0.630688	0.574139	0.635846	0.57352	0.651624	0.717764	0.593289	0.635259	0.596123	0.568158	0.688826	0.504876	0.547612	0.702396	0.487383	0.535645	0.46511	0.505271	0.493422
Cell_0235	TFEB_TR	EAA 1.000000e-01 X + Insulin 10000 ng/ml	2.12036	0.503022	1.74298	2.0296	1.81897	1.19155	0.774036	0.905836	1.28753	2.05013	0.840049	1.33867	1.68675	1.30172	1.68004	2.71806	0.540525	1.07413	0.847307	2.16607	1.27631	1.41461	1.62215	1.03455	1.33884	1.18623	1.07614	1.40623	1.69295	1.16749	1.95461	1.12801	0.860876	1.046	1.23364	1.08189	1.23154	2.45304	1.84004	0.96096	2.09755	1.07743	1.03682	2.08663	2.12971	0.622005	1.71583
Cell_0235	FOXO_TR	EAA 1.000000e-01 X + Insulin 10000 ng/ml	3.05381	1.62512	1.68997	3.17992	1.79835	1.87605	1.18291	2.01261	1.69833	2.74985	1.36652	2.08257	2.11113	2.03618	2.35583	2.55058	1.96681	1.54604	2.08338	1.90611	1.78637	2.24683	2.05077	2.21278	2.88834	2.24726	1.81115	1.69758	2.62897	1.04663	3.00773	2.64222	2.33618	1.68612	1.55067	2.24529	2.6995	1.86994	2.61147	1.05589	2.0635	1.95031	1.34349	3.18563	2.77245	1.36903	1.13326
Cell_0235	AMPKARt2	EAA 1.000000e-01 X + Insulin 10000 ng/ml	0.444589	0.655277	0.485415	0.589353	0.589818	0.741243	0.636518	0.605482	0.572668	0.401228	0.488862	0.618793	0.634689	0.689369	0.530834	0.440389	0.613796	0.650917	0.693432	0.663087	0.600501	0.590571	0.396466	0.704132	0.727042	0.661906	0.602443	0.622009	0.615044	0.583405	0.641752	0.581625	0.658437	0.718595	0.569444	0.635638	0.590494	0.578848	0.67702	0.518442	0.536693	0.702479	0.513322	0.519752	0.473441	0.534914	0.48512
Cell_0236	TFEB_TR	EAA 1.000000e-01 X + Insulin 10000 ng/ml	1.97868	0.525746	1.63918	2.12712	1.95708	1.24135	0.754648	0.835973	1.16596	2.11172	0.764626	1.437	1.40879	1.17685	1.45519	2.40359	0.55047	1.15608	0.794801	1.56382	1.18745	1.33625	1.77779	1.25814	1.32611	1.38547	1.07908	1.51232	1.75532	1.17443	2.09631	1.06343	0.911426	1.0384	1.21952	1.04428	1.29638	2.45184	1.86241	0.573101	1.96315	0.916703	0.924525	2.27968	2.12993	0.641873	1.47141
Cell_0236	FOXO_TR	EAA 1.000000e-01 X + Insulin 10000 ng/ml	2.74691	1.75122	1.71583	3.17968	1.83276	1.83823	1.1952	1.99134	1.64863	2.83212	1.30651	2.17894	2.0078	2.0378	2.25708	2.4506	2.07058	1.53441	2.00429	1.87807	1.71759	2.26698	2.04186	2.12013	2.89301	2.30564	2.0937	1.83836	2.67175	1.49231	2.94774	2.55744	2.70657	1.57776	1.56529	2.21972	2.82155	1.95502	2.63833	2.35332	2.05701	1.99239	1.35434	3.22644	2.88994	1.39827	1.10552
Cell_0236	AMPKARt2	EAA 1.000000e-01 X + Insulin 10000 ng/ml	0.438976	0.653379	0.484863	0.575776	0.582961	0.738603	0.6366	0.604349	0.589727	0.394588	0.500754	0.611233	0.640776	0.673224	0.53895	0.437467	0.601067	0.646689	0.683714	0.679744	0.592835	0.565036	0.417743	0.703556	0.746825	0.668622	0.613443	0.625886	0.617287	0.610542	0.634757	0.575651	0.660767	0.7101	0.56613	0.621023	0.603282	0.59155	0.669935	0.607883	0.538348	0.704191	0.527696	0.529587	0.466749	0.534142	0.479706
Cell_0237	TFEB_TR	EAA 1.000000e-01 X + Insulin 10000 ng/ml	1.97869	0.536745	2.56784	2.24758	2.21811	1.19151	0.771394	0.881071	1.07361	2.11121	0.650467	1.55932	1.03922	1.56523	1.39593	2.25711	0.580028	0.99032	0.77921	1.55754	1.14008	1.35787	1.87933	1.24009	1.25269	1.5146	1.1476	1.38562	1.80963	1.2454	1.90866	1.03417	0.97998	0.974433	1.16288	0.988846	0.693316	2.55323	1.77476	0.615021	1.92731	1.12658	1.074	1.59599	2.24614	0.641956	1.74882
Cell_0237	FOXO_TR	EAA 1.000000e-01 X + Insulin 10000 ng/ml	2.6847	1.86915	1.70394	3.0701	1.8515	1.8804	1.20147	2.02523	1.67309	2.90862	1.27734	2.41517	2.03921	2.10653	2.24033	2.38805	2.16546	1.54491	1.90923	1.90567	1.68014	2.21508	2.02224	2.0574	2.9669	2.32097	2.74277	1.95819	2.58774	2.0862	2.87028	2.47083	2.57092	1.74004	1.48712	2.13297	2.55852	2.00649	2.6804	2.359	2.03328	2.01679	1.33659	3.17144	2.66448	1.37251	1.09742
Cell_0237	AMPKARt2	EAA 1.000000e-01 X + Insulin 10000 ng/ml	0.438863	0.648453	0.479283	0.553382	0.593319	0.735184	0.641509	0.598745	0.576264	0.390822	0.503279	0.611988	0.643069	0.667287	0.534236	0.436758	0.607807	0.663438	0.673118	0.692416	0.582733	0.555829	0.418188	0.700907	0.746368	0.654795	0.63474	0.636644	0.622945	0.621363	0.632013	0.587038	0.657013	0.707007	0.590612	0.61412	0.612483	0.579191	0.669454	0.614406	0.563271	0.704568	0.541169	0.53544	0.450935	0.509243	0.483824
Cell_0238	TFEB_TR	EAA 1.000000e-01 X + Insulin 10000 ng/ml	1.99716	0.544453	3.13001	2.28326	2.20528	1.07533	0.805024	1.01482	1.1603	2.01744	0.601148	1.53893	1.45224	1.95897	1.38661	2.67457	0.623234	0.987849	0.80243	2.39193	1.12358	1.60636	1.98195	1.0666	1.19314	1.39321	1.19511	1.14972	1.79463	1.30127	1.71529	1.08405	1.04008	0.542609	1.07047	1.10399	0.734174	2.34352	1.77973	0.622432	1.92822	1.33981	1.16759	1.1117	2.15751	0.63268	2.0477
Cell_0238	FOXO_TR	EAA 1.000000e-01 X + Insulin 10000 ng/ml	2.71133	1.90721	1.72403	3.17858	1.81755	1.83092	1.16782	2.05916	1.68058	2.9679	1.32091	2.54495	2.16128	2.15458	2.27322	2.40573	2.19686	1.52523	1.91371	1.96517	1.79347	2.16183	2.06899	2.33136	2.91725	2.28047	3.09994	1.83363	2.52684	2.37943	2.8538	2.49249	2.53245	0.985049	1.4488	2.07973	2.56627	2.00217	2.63606	2.34781	2.02976	1.9949	1.35611	3.08939	2.43435	1.33744	1.11509
Cell_0238	AMPKARt2	EAA 1.000000e-01 X + Insulin 10000 ng/ml	0.442535	0.656455	0.479218	0.543826	0.595126	0.745786	0.651858	0.580844	0.554961	0.396914	0.496401	0.625649	0.635036	0.684213	0.537072	0.435784	0.61397	0.66853	0.681192	0.686852	0.5936	0.565839	0.395152	0.707955	0.730585	0.64428	0.658371	0.632421	0.610917	0.612422	0.64271	0.609002	0.655859	0.587456	0.591568	0.621276	0.615909	0.571972	0.660021	0.612586	0.56717	0.721081	0.543367	0.514054	0.458467	0.512781	0.496635
Cell_0239	TFEB_TR	EAA 1.000000e-01 X + Insulin 10000 ng/ml	1.96851	0.549107	2.52651	2.09225	1.96469	1.13011	0.784594	1.11213	1.25157	2.01622	0.684713	1.39173	1.57444	1.9364	1.37755	2.74281	0.658422	1.31893	0.820569	2.69414	1.19064	1.83361	2.10821	1.07349	1.1957	1.16885	1.17894	1.11126	1.69305	1.32884	0.617815	1.09029	1.05208	0.550673	1.13221	1.20026	0.736464	1.8535	1.88398	0.61328	1.79851	1.13772	1.28745	1.53719	1.94403	0.655566	1.78613
Cell_0239	FOXO_TR	EAA 1.000000e-01 X + Insulin 10000 ng/ml	2.66674	1.9116	1.81555	3.19651	1.82403	1.76419	1.16393	2.0756	1.74131	2.99558	1.31152	2.48881	2.18901	2.12978	2.17824	2.42125	2.11462	1.58218	1.93959	1.94184	2.16281	2.15092	2.09274	2.56556	2.8279	2.19172	3.1422	1.73798	2.55468	2.48511	1.20708	2.52352	2.66668	0.993767	1.43054	2.03924	2.63335	1.99305	2.63952	2.29404	2.02779	1.98993	1.40565	2.96753	2.48132	1.47103	1.10421
Cell_0239	AMPKARt2	EAA 1.000000e-01 X + Insulin 10000 ng/ml	0.450744	0.651204	0.475909	0.563021	0.564405	0.7411	0.658298	0.572353	0.567404	0.396723	0.507067	0.628861	0.63442	0.69298	0.54128	0.436511	0.612428	0.65851	0.695734	0.681558	0.606836	0.571237	0.403315	0.71755	0.730734	0.653866	0.663709	0.624951	0.601244	0.608656	0.614618	0.604583	0.659292	0.611829	0.571584	0.628824	0.604491	0.590848	0.651623	0.613788	0.553861	0.728548	0.538448	0.508687	0.467602	0.541197	0.508852
Cell_0240	TFEB_TR	EAA 1.000000e-01 X + Insulin 10000 ng/ml	1.95066	0.546679	2.23645	2.23849	2.57426	1.3016	0.733128	1.3023	1.23771	2.18097	0.839221	1.29819	0.985481	1.53609	1.33031	2.30445	0.683	1.31848	0.782267	2.22109	1.45357	1.7715	2.19142	1.13823	1.12806	1.21371	1.17131	0.952229	1.63498	1.38561	0.605099	1.0581	1.06968	0.557321	1.2582	1.07788	0.708014	1.73224	1.80641	0.594401	1.72523	0.860686	1.53964	1.64248	1.88165	0.681315	1.51165
Cell_0240	FOXO_TR	EAA 1.000000e-01 X + Insulin 10000 ng/ml	2.6136	1.90543	1.85924	2.92568	1.86249	1.90116	1.17009	2.10523	1.83942	3.01777	1.24096	2.44368	2.1296	2.04812	2.19446	2.55717	1.99512	1.8403	1.93634	1.90151	2.60095	2.11072	2.07787	2.52677	2.86491	2.10699	3.27172	1.95703	2.67397	2.69172	1.13574	2.49231	2.7183	0.990072	1.38397	2.05737	2.66092	1.99891	2.71039	2.24057	1.99159	1.93585	1.42625	2.85451	2.55254	1.5769	1.06167
Cell_0240	AMPKARt2	EAA 1.000000e-01 X + Insulin 10000 ng/ml	0.454407	0.600657	0.469329	0.571333	0.533004	0.725096	0.644398	0.583294	0.587591	0.394906	0.524866	0.61162	0.631712	0.681051	0.544942	0.433096	0.611068	0.664309	0.688449	0.67735	0.609381	0.571596	0.434929	0.721847	0.735714	0.656286	0.655384	0.567506	0.596137	0.611873	0.618047	0.586702	0.66163	0.61158	0.577584	0.629616	0.599681	0.602109	0.650707	0.622541	0.550979	0.712051	0.544916	0.522182	0.470672	0.54072	0.518749
Cell_0241	TFEB_TR	EAA 1.000000e-01 X + Insulin 10000 ng/ml	1.94295	0.549215	3.07957	2.5322	3.62422	1.30635	0.738843	1.54606	1.18664	2.32643	0.941038	1.37162	0.665671	1.40981	1.24316	1.94196	0.711364	1.16534	0.719387	2.09288	1.47091	1.54433	2.2167	1.15434	0.70846	1.36137	1.15034	1.12773	1.75004	1.42507	0.600551	1.06095	1.09737	0.566279	1.13223	1.03173	0.697808	1.88237	1.60242	0.571321	1.72593	0.93596	1.60759	1.20416	1.93846	0.661053	1.77057
Cell_0241	FOXO_TR	EAA 1.000000e-01 X + Insulin 10000 ng/ml	2.6588	1.8815	1.88956	2.80214	1.89294	1.94428	1.16882	2.20054	1.79978	3.08322	1.20981	2.71098	2.09657	2.02126	2.47583	2.84603	1.96362	2.23822	2.01564	1.8815	2.70846	2.03372	2.12805	2.52832	1.97219	2.12299	3.3292	1.90591	2.82388	2.83868	1.08542	2.51158	2.69546	1.00444	1.37301	2.02362	2.5763	1.95808	2.66855	2.23267	1.96615	1.82513	1.44376	2.79949	2.43731	1.44979	1.05331
Cell_0241	AMPKARt2	EAA 1.000000e-01 X + Insulin 10000 ng/ml	0.457261	0.537764	0.476351	0.551499	0.532727	0.727169	0.628566	0.594102	0.567711	0.400663	0.521427	0.605078	0.625854	0.67396	0.550176	0.431906	0.609987	0.681643	0.680233	0.672262	0.61737	0.581087	0.454938	0.720151	0.646449	0.644743	0.652694	0.543066	0.589396	0.612267	0.623946	0.583422	0.660298	0.607225	0.59584	0.619713	0.617331	0.591529	0.648541	0.62995	0.555314	0.70687	0.560614	0.522833	0.478742	0.525908	0.523246
Cell_0242	TFEB_TR	EAA 1.000000e-01 X + Insulin 10000 ng/ml	1.95336	0.558457	3.76278	2.2651	3.34387	1.15693	0.811228	1.561	1.1711	2.39835	0.968343	1.43902	0.888183	2.02849	1.35087	1.74023	0.74103	1.37392	0.710244	2.20751	1.22015	1.08254	2.18552	1.26192	0.571514	1.22562	1.09158	1.15465	1.80231	1.3831	0.610964	1.05689	1.0641	0.577352	0.996073	1.09712	0.704446	1.8613	1.56063	0.570725	1.66369	1.06469	1.58272	1.1241	1.98746	0.634234	1.75488
Cell_0242	FOXO_TR	EAA 1.000000e-01 X + Insulin 10000 ng/ml	2.84733	1.84631	1.91148	2.90558	1.94969	1.74981	1.26427	2.30747	1.92622	3.15469	1.18411	3.21372	2.08769	2.05867	2.61517	3.07308	1.94763	2.49655	2.15247	1.85117	2.50352	1.29914	2.20245	2.56749	1.9079	2.15948	3.21205	1.84139	2.83839	2.74378	1.08156	2.61042	2.58032	1.03366	1.4035	1.92536	2.50892	1.88757	2.54656	2.24705	1.97437	1.79163	1.48148	2.7411	2.34679	1.33926	1.08601
Cell_0242	AMPKARt2	EAA 1.000000e-01 X + Insulin 10000 ng/ml	0.470469	0.51537	0.484894	0.550765	0.554162	0.725194	0.637495	0.594671	0.546988	0.402171	0.506311	0.621042	0.626679	0.676861	0.546962	0.436759	0.612305	0.682499	0.691501	0.671707	0.629208	0.556743	0.468975	0.709336	0.64999	0.645587	0.651906	0.554314	0.595185	0.609775	0.632374	0.590804	0.662137	0.61841	0.598972	0.608265	0.62689	0.579787	0.649732	0.634181	0.565278	0.712942	0.563619	0.516026	0.473224	0.52494	0.517493
Cell_0243	TFEB_TR	EAA 1.000000e-01 X + Insulin 10000 ng/ml	2.03778	0.565587	3.01116	1.96175	2.73665	1.06178	0.835267	1.53829	1.21907	2.49095	0.950024	1.42006	1.09621	2.45274	1.58569	1.88813	0.753951	1.39292	1.36545	2.02888	1.25902	1.09534	2.12003	1.39614	0.580384	1.11068	1.06924	1.01261	1.67537	1.33516	0.618934	1.04235	1.02689	0.585595	1.07826	1.00901	0.693425	1.7188	1.64982	0.58288	1.66587	0.856414	1.54857	1.46693	1.96662	0.64878	1.31676
Cell_0243	FOXO_TR	EAA 1.000000e-01 X + Insulin 10000 ng/ml	3.10765	1.79739	1.86301	2.90456	1.97774	1.8964	1.40422	2.31853	2.48583	3.14573	1.11332	3.49948	2.07768	2.01689	2.5522	3.09113	1.8555	2.45725	1.70779	1.86915	2.42126	1.3132	2.20353	2.47195	1.94313	2.0737	3.228	1.81592	2.75039	2.58223	1.08299	2.70191	2.45418	1.04003	1.4064	1.94591	2.4824	1.90142	2.62955	2.27122	1.99153	1.9764	1.52114	2.71523	2.43532	1.36722	1.1124
Cell_0243	AMPKARt2	EAA 1.000000e-01 X + Insulin 10000 ng/ml	0.493266	0.527235	0.476602	0.574883	0.571694	0.713291	0.645936	0.59615	0.578566	0.397689	0.499938	0.634449	0.618785	0.674272	0.543859	0.441033	0.622732	0.671801	0.47982	0.66715	0.632063	0.561213	0.470174	0.707352	0.644012	0.658522	0.640372	0.569718	0.615196	0.608693	0.637804	0.59266	0.668899	0.629651	0.59541	0.616788	0.621857	0.579964	0.654298	0.634944	0.572396	0.705008	0.553612	0.516305	0.458633	0.51708	0.516219
Cell_0244	TFEB_TR	EAA 1.000000e-01 X + Insulin 10000 ng/ml	2.18594	0.582453	2.34034	2.09678	3.52481	1.18704	0.762612	1.71293	1.2666	2.56751	0.934832	1.4789	1.0556	1.89988	1.56605	1.18364	0.746048	1.06649	1.56727	2.08929	1.41406	1.0833	2.19896	1.31905	0.677686	1.3262	1.06095	0.945643	1.68603	1.36119	0.615451	1.06038	1.05934	0.591022	1.15528	0.953839	0.683506	1.6347	1.64749	0.584508	1.69234	0.770865	1.31776	1.82067	1.86891	0.673155	1.52763
Cell_0244	FOXO_TR	EAA 1.000000e-01 X + Insulin 10000 ng/ml	3.24085	1.80585	2.09142	2.84334	1.92885	2.49366	1.42163	2.27925	2.86948	3.1168	1.05859	3.43315	2.12117	1.91457	2.62134	1.29411	1.78829	2.31414	1.71861	1.88897	2.54466	1.29207	2.18842	2.46023	2.09878	1.9653	3.34026	1.77929	2.76235	2.55516	1.06133	2.75329	2.50989	1.04116	1.40593	2.05193	2.37996	1.99419	2.79855	2.30163	1.98458	2.22541	1.57055	2.80745	2.52363	1.31275	1.13136
Cell_0244	AMPKARt2	EAA 1.000000e-01 X + Insulin 10000 ng/ml	0.515216	0.539292	0.47874	0.574982	0.565164	0.724848	0.635015	0.603439	0.615873	0.397356	0.494629	0.638322	0.610081	0.673593	0.543118	0.604875	0.624492	0.670422	0.455913	0.662375	0.631642	0.57201	0.443168	0.720001	0.652003	0.651297	0.626653	0.56917	0.628565	0.612134	0.640449	0.58609	0.669575	0.626194	0.590377	0.634953	0.633302	0.591022	0.649642	0.631873	0.562452	0.699349	0.551867	0.521667	0.469981	0.510015	0.524229
Cell_0245	TFEB_TR	EAA 1.000000e-01 X + Insulin 10000 ng/ml	2.27559	0.613553	3.73618	2.119	4.04155	1.48339	0.78688	1.78246	1.2963	2.641	0.99653	1.54899	0.664198	1.43459	1.35879	1.22363	0.727889	1.01276	1.54002	2.27548	1.2951	1.10817	2.399	1.11842	0.727375	1.3711	1.01026	1.06954	1.86354	1.41199	0.616356	1.06563	1.08388	0.600416	1.2134	1.08119	0.701636	1.5892	1.64413	0.58158	1.56618	1.13975	1.22162	1.73558	1.79364	0.675172	1.85902
Cell_0245	FOXO_TR	EAA 1.000000e-01 X + Insulin 10000 ng/ml	3.16271	1.90572	2.76323	2.85878	1.91679	3.00345	1.44898	2.27491	2.80273	3.17103	1.03861	3.25419	1.31702	1.93005	2.68801	1.39358	1.77417	2.24001	1.75601	1.82854	2.59485	1.28738	2.168	2.58743	2.18623	1.96337	3.26555	1.69528	2.85188	2.63867	1.05798	2.71709	2.62341	1.06005	1.46185	2.0679	2.3257	2.02589	2.73459	2.29194	1.95445	2.24617	1.60557	2.91344	2.45176	1.1806	1.13234
Cell_0245	AMPKARt2	EAA 1.000000e-01 X + Insulin 10000 ng/ml	0.509087	0.547825	0.503286	0.557373	0.546218	0.745393	0.63386	0.605561	0.604161	0.402826	0.490875	0.639626	0.575736	0.682506	0.532524	0.628132	0.608475	0.671853	0.459453	0.674301	0.631299	0.585623	0.414387	0.713944	0.666915	0.62864	0.626063	0.560877	0.623631	0.617068	0.644373	0.586531	0.662849	0.62256	0.59473	0.632466	0.642837	0.598573	0.642979	0.631859	0.560775	0.702889	0.554648	0.524519	0.490633	0.516337	0.524
Cell_0246	TFEB_TR	EAA 1.000000e-01 X + Insulin 10000 ng/ml	2.23385	0.629754	4.91147	2.01044	3.22599	1.52326	0.963588	1.7021	1.44581	1.03059	1.05614	1.49624	0.6347	1.64425	1.20956	1.16294	0.716993	1.11633	1.36932	1.90029	1.16338	1.16982	2.35116	1.09699	0.741035	1.07175	0.991461	1.10748	1.90939	1.4136	0.623612	1.03718	1.0552	0.61645	1.25224	1.14534	0.72932	1.44955	1.85329	0.579792	1.457	1.2841	1.38178	1.25351	1.7873	0.675417	1.43752
Cell_0246	FOXO_TR	EAA 1.000000e-01 X + Insulin 10000 ng/ml	3.02685	1.91352	3.25902	2.83191	1.94236	3.33859	1.60993	2.2538	2.90945	1.11527	1.00637	3.12	1.32452	2.02955	2.63649	1.32128	1.74341	2.17814	1.77847	1.82161	2.58977	1.32698	2.03777	2.59039	2.14262	1.96554	3.11123	1.67144	2.86707	2.6848	1.07093	2.60383	2.60682	1.06866	1.49647	2.02387	2.39051	1.97996	2.73909	2.22133	1.9731	2.11076	1.57991	2.88748	2.34298	1.14163	1.11182
Cell_0246	AMPKARt2	EAA 1.000000e-01 X + Insulin 10000 ng/ml	0.468162	0.560982	0.511349	0.566524	0.541382	0.747919	0.64541	0.600743	0.57947	0.503121	0.507251	0.62559	0.58363	0.686092	0.528742	0.626512	0.609156	0.666486	0.475276	0.685962	0.6235	0.587896	0.407825	0.693965	0.657033	0.630353	0.633755	0.553362	0.613847	0.623499	0.643105	0.596904	0.660743	0.629375	0.611277	0.620335	0.628275	0.592893	0.644418	0.631321	0.580521	0.6973	0.543803	0.5218	0.483867	0.502586	0.517308
Cell_0247	TFEB_TR	EAA 1.000000e-01 X + Insulin 10000 ng/ml	2.15983	0.616853	3.57871	2.20426	2.85842	1.21577	0.950251	1.71802	1.55825	0.867432	0.999803	1.47208	0.588264	1.64587	1.11505	1.10262	0.724648	1.07813	1.31274	1.57851	1.27395	1.19757	2.05325	1.14288	0.740193	1.05175	1.01238	1.00032	1.8362	1.37974	0.631782	1.01981	1.03702	0.627576	1.1958	1.07862	0.721894	1.24708	2.00808	0.586465	1.46454	0.931493	1.35507	1.33293	1.81037	0.704242	1.29077
Cell_0247	FOXO_TR	EAA 1.000000e-01 X + Insulin 10000 ng/ml	2.91424	1.73369	3.25005	2.79796	1.88226	3.54726	1.7274	2.1942	3.08325	1.14559	0.960667	3.10992	1.24671	2.05639	2.70267	1.29089	1.76065	2.10725	1.73449	1.90662	2.69383	1.35506	1.83941	2.5077	2.15205	1.92857	3.16094	1.72414	2.78576	2.67134	1.06389	2.5467	2.5452	1.07452	1.44854	2.0315	2.34708	2.00236	2.99142	2.15219	1.98395	2.07277	1.55773	2.81805	2.35185	1.1732	1.15109
Cell_0247	AMPKARt2	EAA 1.000000e-01 X + Insulin 10000 ng/ml	0.441967	0.573553	0.49775	0.583258	0.544723	0.743977	0.690862	0.603142	0.58476	0.523176	0.520816	0.600731	0.599423	0.684211	0.531541	0.632592	0.63325	0.665204	0.477322	0.677591	0.615152	0.574966	0.4113	0.697368	0.636915	0.647893	0.635103	0.562757	0.61347	0.632584	0.6363	0.599769	0.663074	0.630713	0.612893	0.622672	0.624051	0.587566	0.646909	0.621976	0.589008	0.691051	0.532707	0.523778	0.473619	0.470287	0.516103
Cell_0248	TFEB_TR	EAA 1.000000e-01 X + Insulin 10000 ng/ml	2.14173	0.601959	2.29646	1.42498	3.26671	1.10316	1.00274	1.7209	1.31788	1.04491	0.960722	1.50934	0.561398	1.45621	1.22766	1.18143	0.735503	1.13526	1.38067	1.90654	1.46167	1.19666	1.90684	1.01385	0.634403	1.33658	0.982395	1.05103	1.82004	1.37032	0.642601	0.999309	1.06486	0.625103	1.25193	0.97744	0.678431	1.20084	1.84885	0.60995	1.42606	0.700041	1.33262	1.99646	1.84594	0.777577	1.53547
Cell_0248	FOXO_TR	EAA 1.000000e-01 X + Insulin 10000 ng/ml	2.79863	1.5789	3.13922	2.2023	1.79615	3.5335	1.74222	2.18794	2.77863	1.06369	0.915364	3.21905	1.23738	2.07649	2.80172	1.37802	1.83144	2.05315	1.67371	1.91891	2.77479	1.34071	1.71099	2.52853	2.13102	1.9513	3.35872	1.76234	2.7079	2.72851	1.05142	2.54018	2.53929	1.09434	1.43056	2.05235	2.25566	2.08735	2.96637	2.15354	1.88267	2.18362	1.61666	2.87688	2.3982	1.20616	1.18243
Cell_0248	AMPKARt2	EAA 1.000000e-01 X + Insulin 10000 ng/ml	0.452079	0.584439	0.495327	0.685738	0.542198	0.737598	0.703986	0.611233	0.600397	0.49549	0.500584	0.59794	0.606808	0.690024	0.511832	0.64069	0.632533	0.665611	0.473811	0.672578	0.618418	0.564501	0.413815	0.707502	0.642085	0.650796	0.630253	0.574935	0.614769	0.635135	0.638322	0.593565	0.663854	0.624434	0.606954	0.62527	0.633066	0.590478	0.650244	0.610974	0.589566	0.69446	0.530822	0.532273	0.484841	0.461152	0.5198
Cell_0249	TFEB_TR	EAA 1.000000e-01 X + Insulin 10000 ng/ml	0.828815	0.605475	2.74234	1.06925	3.35468	1.23652	1.02422	1.7078	1.07797	1.10779	1.00905	1.48503	0.567288	1.57367	1.52448	1.33436	0.733408	1.19442	1.53932	2.06312	1.41182	1.21192	1.90007	0.993047	0.539033	1.36514	0.945004	1.16388	1.81738	1.3841	0.648772	0.966211	1.10649	0.621322	1.37165	0.918354	0.685146	1.2642	1.71852	0.638852	1.38102	0.827556	1.57165	1.99453	1.81386	0.886282	1.30265
Cell_0249	FOXO_TR	EAA 1.000000e-01 X + Insulin 10000 ng/ml	1.51808	1.56866	3.08206	2.14299	1.77518	3.5753	1.72537	2.21951	2.57592	1.03698	0.871744	3.22401	1.29675	2.14516	2.74143	1.43526	1.82311	1.9751	1.66243	1.90724	2.72775	1.32542	1.64078	2.57315	1.96096	1.94777	3.47803	1.79493	2.76366	2.81	1.05186	2.51367	2.54123	1.07945	1.46253	2.01222	2.3554	2.09859	2.63445	2.1982	1.85097	2.34601	1.6561	2.93322	2.35624	1.24115	1.09172
Cell_0249	AMPKARt2	EAA 1.000000e-01 X + Insulin 10000 ng/ml	0.590539	0.598673	0.500093	0.692855	0.537312	0.727519	0.702785	0.606052	0.59849	0.471632	0.487257	0.614985	0.603159	0.693939	0.490841	0.628958	0.614637	0.659926	0.474962	0.684467	0.622941	0.565073	0.41733	0.697755	0.671906	0.654207	0.629813	0.575397	0.611285	0.636549	0.645329	0.590753	0.668771	0.622146	0.620361	0.617669	0.625964	0.592622	0.652775	0.600958	0.605667	0.702543	0.519229	0.532396	0.491686	0.467875	0.53162
Cell_0250	TFEB_TR	EAA 1.000000e-01 X + Insulin 10000 ng/ml	0.834093	0.618177	3.30184	1.2548	3.26469	1.16882	0.995836	1.81331	1.27084	1.12853	0.964732	1.49163	0.560181	1.54702	1.57163	1.36732	0.726737	1.04586	1.72799	1.73744	1.15255	1.23922	1.76023	1.25822	0.677942	1.21727	0.953163	1.01545	1.73371	1.38197	0.647923	0.974843	1.093	0.6271	1.31486	0.915642	0.765507	1.20713	1.74606	0.6672	1.42371	1.11335	1.64706	1.30534	1.7157	0.989656	1.43642
Cell_0250	FOXO_TR	EAA 1.000000e-01 X + Insulin 10000 ng/ml	1.5345	1.56212	2.98263	2.06703	1.75462	3.72159	1.76023	2.17402	2.914	1.08487	0.865195	3.02572	1.28132	2.12419	2.64779	1.44709	1.79126	1.91309	1.6604	1.98878	2.69755	1.34412	1.56351	2.54865	1.99845	1.83001	3.50229	1.85466	2.86977	2.79398	1.05378	2.5551	2.51185	1.03907	1.4452	1.97347	2.4165	2.08558	2.51797	2.2024	1.92585	2.39256	1.56082	2.82764	2.27903	1.26861	1.22945
Cell_0250	AMPKARt2	EAA 1.000000e-01 X + Insulin 10000 ng/ml	0.585204	0.606366	0.495942	0.70215	0.530077	0.724797	0.702487	0.592342	0.583368	0.473064	0.508392	0.622443	0.604742	0.686178	0.499747	0.629136	0.626238	0.657947	0.472377	0.694737	0.618143	0.562884	0.415352	0.689493	0.698596	0.66589	0.634862	0.589316	0.614179	0.646381	0.638315	0.597443	0.674064	0.614135	0.630212	0.61951	0.619964	0.590523	0.647436	0.589608	0.61021	0.713674	0.508906	0.531673	0.485913	0.456233	0.551926
Cell_0251	TFEB_TR	EAA 1.000000e-01 X + Insulin 10000 ng/ml	0.801067	0.630753	3.41931	1.52396	3.13608	1.0106	0.996185	1.80408	1.48221	1.35053	0.87012	1.56898	0.539061	1.39045	1.42889	1.29417	0.724142	0.999605	1.65309	1.8288	1.12292	1.26314	1.60241	1.42121	0.844149	1.2138	0.921227	0.831843	1.69761	1.38185	0.653294	1.01618	1.01596	0.64158	1.22014	0.839578	0.836358	1.12669	1.67992	0.709899	1.44979	1.30567	1.70378	1.0148	1.6779	1.0569	2.10229
Cell_0251	FOXO_TR	EAA 1.000000e-01 X + Insulin 10000 ng/ml	1.45611	1.51751	2.95129	1.98003	1.70189	3.61616	1.84386	2.07802	3.11497	1.0623	0.906657	2.8836	1.26348	2.06487	2.66158	1.4507	1.86057	1.95214	1.63312	2.0138	2.71438	1.3749	1.5335	2.51272	2.29928	1.78117	3.4589	1.90519	2.84575	2.81672	1.05069	2.67209	2.5347	1.04616	1.46267	1.99397	2.23802	2.09199	2.59875	2.14801	1.87231	2.28762	1.43598	2.81521	2.27921	1.29033	1.88354
Cell_0251	AMPKARt2	EAA 1.000000e-01 X + Insulin 10000 ng/ml	0.593879	0.599988	0.496023	0.706145	0.52493	0.732063	0.708255	0.596621	0.574045	0.472036	0.5129	0.620849	0.610473	0.682828	0.511245	0.644419	0.643016	0.655536	0.472695	0.701236	0.618136	0.557422	0.403247	0.696422	0.69125	0.667867	0.64207	0.590308	0.62329	0.644507	0.623022	0.607114	0.669082	0.598348	0.618385	0.635786	0.628892	0.584254	0.646629	0.585956	0.599501	0.710812	0.523741	0.551542	0.497073	0.439693	0.57119
Cell_0252	TFEB_TR	EAA 1.000000e-01 X + Insulin 10000 ng/ml	0.821071	0.634141	3.32515	1.32344	2.60834	1.01439	1.05142	1.62133	1.41689	1.25624	0.930882	1.55824	0.557599	1.63857	1.4168	1.3284	0.719089	1.18696	1.41698	2.14985	1.36973	1.28913	1.58846	1.30419	0.776713	1.19706	0.865435	0.91941	1.86031	1.39208	0.673973	1.03653	0.977794	0.673237	1.17201	0.886777	0.904199	1.13979	1.67414	0.784805	1.43732	1.21148	2.03453	1.30899	1.62785	1.10367	1.91432
Cell_0252	FOXO_TR	EAA 1.000000e-01 X + Insulin 10000 ng/ml	1.41061	1.52192	2.93586	1.89087	1.65682	3.41029	1.87378	2.01058	3.01184	1.0292	0.927514	2.94949	1.3398	2.12006	2.77818	1.48779	1.89908	1.99736	1.63979	1.94059	2.65914	1.38236	1.57785	2.49797	2.33364	1.84087	3.34956	1.93648	2.86089	2.90477	1.0523	2.74977	2.61163	1.0736	1.54461	1.99884	2.13384	2.06431	2.64185	2.08552	2.02535	2.2252	1.43033	2.97705	2.33251	1.31891	2.53233
Cell_0252	AMPKARt2	EAA 1.000000e-01 X + Insulin 10000 ng/ml	0.606532	0.599259	0.503674	0.704353	0.532841	0.740814	0.705389	0.614699	0.577827	0.484558	0.491705	0.618617	0.60899	0.692568	0.506469	0.642768	0.63546	0.652034	0.482957	0.70614	0.630443	0.560809	0.40147	0.702069	0.639057	0.665776	0.651724	0.552808	0.621742	0.632084	0.617112	0.602507	0.665175	0.589104	0.606702	0.645591	0.631203	0.580854	0.655962	0.586285	0.619737	0.689422	0.539798	0.57972	0.527964	0.449668	0.580085
Cell_0253	TFEB_TR	EAA 1.000000e-01 X + Insulin 10000 ng/ml	0.883432	0.625896	2.82136	0.94481	2.12813	0.982479	1.10114	1.55708	1.47801	0.894729	0.999962	1.49343	0.602529	1.94636	1.38498	1.45074	0.702723	1.27773	1.40136	1.768	1.44869	1.32913	1.55886	1.1307	0.717183	1.10207	0.897428	1.06817	1.98513	1.37104	0.703608	1.0343	1.01198	0.722614	1.09579	1.267	1.00264	1.08172	1.7733	0.880013	1.46529	1.13218	2.02858	1.69017	1.53089	1.14326	1.42612
Cell_0253	FOXO_TR	EAA 1.000000e-01 X + Insulin 10000 ng/ml	1.41483	1.57304	2.76793	1.80255	1.64453	3.37727	1.85626	1.92879	3.02163	1.07323	0.897294	3.03477	1.39818	2.15809	2.8477	1.57537	1.82187	1.96473	1.69154	1.93262	2.56368	1.38433	1.58913	2.4951	2.04314	1.83199	3.33371	1.96671	3.05167	2.86521	1.07092	2.75222	2.60297	1.07426	1.52172	1.9649	2.21899	2.18866	2.66203	2.0608	2.77018	2.26124	1.50267	2.9697	2.32147	1.30559	2.69436
Cell_0253	AMPKARt2	EAA 1.000000e-01 X + Insulin 10000 ng/ml	0.606505	0.611267	0.502796	0.713258	0.547037	0.736794	0.697818	0.617884	0.58095	0.509537	0.494621	0.61386	0.604447	0.697633	0.506648	0.639653	0.630439	0.666504	0.487146	0.700431	0.641756	0.564851	0.415205	0.700118	0.577584	0.659506	0.65242	0.550568	0.61198	0.638984	0.622224	0.589352	0.670989	0.583503	0.609203	0.640817	0.628103	0.596936	0.65912	0.576887	0.653022	0.681326	0.530954	0.588906	0.540055	0.464654	0.569398
Cell_0254	TFEB_TR	EAA 1.000000e-01 X + Insulin 10000 ng/ml	0.876003	0.636763	2.38681	0.892423	2.23409	0.838128	1.12953	1.57265	1.70879	0.95666	0.882607	1.4985	0.608827	1.89441	1.34967	1.47271	0.687247	1.16462	1.46438	1.5713	1.2652	1.38205	1.45168	1.11304	0.808263	1.14823	0.948027	1.06143	1.81054	1.3396	0.726868	1.01083	1.01934	0.764205	1.08968	1.4273	1.06333	0.996165	1.66184	0.947278	1.49672	1.20482	1.80298	1.69783	1.59166	1.14493	1.73447
Cell_0254	FOXO_TR	EAA 1.000000e-01 X + Insulin 10000 ng/ml	1.37477	1.65501	2.58047	1.77328	1.68814	3.2785	1.85116	1.83639	3.0434	1.11356	0.875839	3.0389	1.35242	2.11338	2.76501	1.61899	1.7866	1.98904	1.6936	1.92775	2.5369	1.42471	1.54853	2.48783	1.81935	1.8214	3.41389	1.97679	3.07659	2.80716	1.09682	2.66349	2.6015	1.07706	1.56846	1.951	2.18658	2.56202	2.6097	2.0897	3.44865	2.2809	1.52552	2.8739	2.26141	1.21281	2.65315
Cell_0254	AMPKARt2	EAA 1.000000e-01 X + Insulin 10000 ng/ml	0.597329	0.611135	0.495879	0.723517	0.551978	0.724865	0.70029	0.609927	0.577618	0.510726	0.515006	0.616123	0.608432	0.691388	0.514655	0.65044	0.637226	0.67887	0.483718	0.697206	0.639194	0.56009	0.419229	0.700102	0.560566	0.637475	0.638555	0.586471	0.615278	0.650156	0.63231	0.587119	0.67442	0.579415	0.626264	0.637723	0.630476	0.620197	0.655162	0.563499	0.646773	0.692969	0.514372	0.577224	0.51926	0.450276	0.548389
Cell_0255	TFEB_TR	EAA 1.000000e-01 X + Insulin 10000 ng/ml	0.834079	0.667641	2.40276	1.12063	2.53593	0.798589	1.12238	1.46972	1.69631	1.26418	0.757876	1.44976	0.581277	1.82176	1.41968	1.45567	0.690861	1.15255	1.43086	2.32561	1.15447	1.42611	1.41347	1.30055	0.828779	1.30053	0.915718	0.97276	1.62692	1.34528	0.741326	0.991257	0.987527	0.789431	1.1639	1.14391	1.08689	1.05531	1.53859	0.964022	1.48206	1.0356	2.00798	1.24482	1.0727	1.10835	1.93715
Cell_0255	FOXO_TR	EAA 1.000000e-01 X + Insulin 10000 ng/ml	1.35473	1.74096	2.54296	1.83792	1.73383	3.09851	1.84241	1.80362	3.02787	1.10705	0.889973	3.04243	1.29065	2.15132	2.69524	1.68562	1.79071	2.0815	1.63717	1.87272	2.56867	1.48186	1.56566	2.47169	1.71748	1.87037	3.37317	1.9398	2.84323	2.89717	1.11138	2.60495	2.74833	1.07042	2.00481	1.929	2.01917	2.85833	2.48549	2.12907	3.51251	2.30132	1.46998	3.02816	1.42422	1.1421	2.68948
Cell_0255	AMPKARt2	EAA 1.000000e-01 X + Insulin 10000 ng/ml	0.594406	0.59913	0.496646	0.710082	0.546001	0.727733	0.707039	0.607031	0.581808	0.505565	0.517848	0.625655	0.619053	0.69061	0.517298	0.649557	0.640829	0.663302	0.495974	0.702675	0.616089	0.552202	0.423006	0.705284	0.59129	0.625673	0.633251	0.57427	0.631445	0.642256	0.633076	0.586872	0.674666	0.584009	0.642547	0.642903	0.631536	0.619024	0.652262	0.557377	0.630807	0.704662	0.515434	0.562169	0.606858	0.432353	0.539464
Cell_0256	TFEB_TR	EAA 1.000000e-01 X + Insulin 10000 ng/ml	0.845693	0.670895	2.55675	1.17711	2.50568	0.940849	1.10466	1.38402	1.45082	1.25995	0.757605	1.33843	0.573208	2.03218	1.30735	1.57944	0.695481	1.32211	1.39701	2.57681	1.27055	1.46767	1.43045	1.4614	0.798898	1.36244	0.890087	0.917043	1.74134	1.35678	0.756908	1.01417	1.00319	0.816291	1.1451	1.05784	1.12661	1.12076	1.66499	0.952813	1.49005	0.58367	2.03182	1.11103	0.951279	1.08877	1.84936
Cell_0256	FOXO_TR	EAA 1.000000e-01 X + Insulin 10000 ng/ml	1.40028	1.73659	2.60006	1.89905	1.67899	3.22216	1.83985	1.78632	3.09691	1.11056	0.905591	3.02922	1.28407	2.21237	2.70884	1.91587	1.72129	2.12853	1.64852	1.92306	2.60672	1.5039	1.62038	2.48244	1.6461	1.82005	3.26432	1.91167	2.82953	2.94704	1.11687	2.77394	2.81693	1.03904	2.50897	1.88008	1.97268	2.88805	2.43736	2.10259	3.49169	0.99205	1.44928	3.18555	1.4786	1.16454	2.70794
Cell_0256	AMPKARt2	EAA 1.000000e-01 X + Insulin 10000 ng/ml	0.598658	0.596929	0.499673	0.697558	0.539121	0.736938	0.708481	0.599922	0.590416	0.515346	0.511789	0.627934	0.622283	0.694998	0.519672	0.638692	0.641476	0.652859	0.519735	0.693493	0.595451	0.537333	0.4269	0.708253	0.620026	0.643201	0.645178	0.541475	0.644239	0.637115	0.619512	0.590177	0.679182	0.585207	0.638805	0.646699	0.634976	0.60549	0.650272	0.563274	0.639759	0.526162	0.529145	0.557616	0.603042	0.438	0.538545
Cell_0257	TFEB_TR	EAA 1.000000e-01 X + Insulin 10000 ng/ml	0.869772	0.65945	2.57894	0.9081	2.30156	1.07663	1.1385	1.44293	1.32531	1.0558	0.748102	1.44723	0.591158	2.23308	1.2142	1.81439	0.686262	1.22982	1.3379	1.93387	1.37066	1.54239	1.4028	1.45348	0.833734	1.33785	0.931943	0.965587	1.9319	1.33724	0.772824	1.01019	1.04123	0.840543	0.999619	1.21884	1.12649	1.10106	0.908643	0.948379	1.57077	0.558083	1.93857	1.65422	1.04586	1.09465	2.19307
Cell_0257	FOXO_TR	EAA 1.000000e-01 X + Insulin 10000 ng/ml	1.42385	1.66147	2.65696	1.92567	1.59074	3.53103	1.8906	1.79114	3.02351	1.14112	0.891606	2.98959	1.28449	2.19585	2.66934	2.10057	1.67426	2.24219	1.73578	1.95119	2.6203	1.50148	1.66461	2.48906	1.62469	1.82509	3.26113	2.01088	3.15455	2.87583	1.11775	2.96805	2.71127	1.031	2.59632	1.8813	1.99086	2.80956	2.33494	2.04262	3.73795	1.06596	1.56462	3.05861	1.50006	1.16471	2.69726
Cell_0257	AMPKARt2	EAA 1.000000e-01 X + Insulin 10000 ng/ml	0.601834	0.595916	0.494344	0.71199	0.535047	0.734445	0.706238	0.5921	0.590301	0.511017	0.511856	0.621973	0.615546	0.694344	0.52317	0.641822	0.640602	0.665792	0.523582	0.677759	0.615397	0.513534	0.390831	0.707407	0.619335	0.665735	0.652598	0.543789	0.655962	0.640331	0.617676	0.609249	0.684661	0.568146	0.636009	0.652758	0.642509	0.607761	0.604567	0.579608	0.637406	0.505697	0.523413	0.558351	0.602322	0.443802	0.535431
Cell_0258	TFEB_TR	EAA 1.000000e-01 X + Insulin 10000 ng/ml	0.862935	0.669977	2.54651	0.817166	2.19434	1.03892	1.17418	1.50432	1.41258	0.986711	0.729639	1.6613	0.606421	1.96736	1.55197	1.95652	0.682753	0.929912	1.41094	1.69692	1.23531	1.62868	1.42608	1.42213	0.830791	1.33823	0.954437	1.06033	1.9587	1.30609	0.7865	0.943793	1.03283	0.85098	0.954769	1.91625	1.07599	1.08023	1.3392	0.977539	1.62379	0.596092	2.72031	1.9313	0.982589	1.08757	2.18877
Cell_0258	FOXO_TR	EAA 1.000000e-01 X + Insulin 10000 ng/ml	1.40999	1.61166	2.70856	1.99163	1.59415	3.49084	1.9197	1.86118	2.86612	1.14732	0.865061	2.99805	1.27704	2.24709	2.61801	2.06347	1.64515	2.37428	1.75789	1.85214	2.59037	1.49235	1.83148	2.42656	1.6473	2.1111	3.27918	2.18682	3.37053	2.8442	1.12011	2.90767	2.65934	1.04739	2.47168	2.97432	1.89286	2.76942	2.43129	2.04169	3.88316	1.07681	1.73256	2.9475	1.43589	1.10836	2.72531
Cell_0258	AMPKARt2	EAA 1.000000e-01 X + Insulin 10000 ng/ml	0.609736	0.588659	0.489989	0.722086	0.529052	0.72787	0.69495	0.594463	0.590061	0.495283	0.521184	0.616426	0.612467	0.70052	0.517265	0.643604	0.634789	0.666862	0.516729	0.679823	0.648475	0.49833	0.365465	0.709333	0.612908	0.680752	0.650655	0.547439	0.670921	0.634527	0.631043	0.611464	0.687363	0.547872	0.649352	0.693435	0.637875	0.611481	0.620301	0.586112	0.613424	0.491506	0.499697	0.553189	0.603213	0.444411	0.53763
Cell_0259	TFEB_TR	EAA 1.000000e-01 X + Insulin 10000 ng/ml	0.86841	0.669145	2.67763	1.08967	1.99427	0.954992	1.20739	1.50605	1.51926	1.09004	0.801149	1.57096	0.608196	1.46807	1.74487	1.94343	0.68198	1.1788	1.6502	1.99223	1.02778	1.69479	1.60259	1.36902	0.819549	1.37663	0.929708	1.08573	1.88215	1.2884	0.796498	0.917839	1.31005	0.868221	1.12815	1.62301	1.0828	1.01617	1.63512	1.00485	1.55565	0.56231	3.38726	1.67921	0.923847	1.07226	1.64897
Cell_0259	FOXO_TR	EAA 1.000000e-01 X + Insulin 10000 ng/ml	1.41704	1.56152	2.79193	2.03214	1.59703	3.18876	1.87307	1.83905	2.93737	1.12095	0.901562	3.01473	1.31036	2.29302	2.64381	1.99582	1.56956	2.24704	1.70385	2.00207	2.55654	1.46361	2.14391	2.36535	1.68124	2.3856	3.2096	2.24274	3.34364	2.84919	1.13561	2.78955	1.96701	1.06244	2.4928	2.94138	1.80169	2.78383	2.56129	2.03948	3.72899	0.967463	1.87397	3.04845	1.3887	1.11505	2.73234
Cell_0259	AMPKARt2	EAA 1.000000e-01 X + Insulin 10000 ng/ml	0.62144	0.586357	0.496444	0.712357	0.526634	0.722369	0.679226	0.594833	0.593657	0.49971	0.54771	0.619097	0.616254	0.710468	0.506868	0.629209	0.625476	0.644694	0.529828	0.682383	0.645115	0.496709	0.412654	0.710835	0.6142	0.683014	0.653411	0.544401	0.681048	0.633596	0.628157	0.589768	0.632816	0.548597	0.647831	0.710883	0.623476	0.603013	0.619285	0.569374	0.595661	0.506365	0.503315	0.545226	0.604183	0.456231	0.537576
Cell_0260	TFEB_TR	EAA 1.000000e-01 X + Insulin 10000 ng/ml	0.900861	0.648159	2.72574	1.13879	1.677	0.927898	1.35666	1.51631	1.58118	1.2711	0.841206	1.39156	0.61026	1.42613	1.40201	1.98861	0.677604	1.71692	1.57581	2.43146	0.991107	1.77328	1.80717	1.28516	0.835015	1.32209	0.918538	1.08068	1.81432	1.24995	0.794251	0.929548	1.36543	0.896398	1.23632	1.67146	1.14391	0.942016	1.6067	0.976828	1.4484	0.515477	3.0246	1.60973	1.07958	1.07084	1.64479
Cell_0260	FOXO_TR	EAA 1.000000e-01 X + Insulin 10000 ng/ml	1.45707	1.46994	2.85218	2.03264	1.53442	3.16828	1.91541	1.79147	3.02276	1.14268	0.950983	2.96351	1.35562	2.23083	2.69252	1.96069	1.73072	2.04487	1.68551	2.4107	2.53753	1.43643	2.41354	2.3442	1.66791	2.41622	3.13767	2.22628	3.33589	1.44824	1.15353	2.80918	2.00553	1.07957	2.49451	2.96442	1.84924	2.78699	2.63758	1.96553	3.54933	0.911899	2.04153	3.05813	1.45184	1.15582	2.69215
Cell_0260	AMPKARt2	EAA 1.000000e-01 X + Insulin 10000 ng/ml	0.611281	0.580545	0.500569	0.705706	0.534825	0.723185	0.68344	0.606252	0.592011	0.511653	0.573247	0.623244	0.615928	0.70743	0.50135	0.625541	0.625533	0.633435	0.541053	0.682383	0.631046	0.491945	0.44618	0.707527	0.601651	0.657563	0.662449	0.550584	0.68792	0.402325	0.616205	0.592221	0.627697	0.560108	0.63077	0.706029	0.620492	0.598332	0.616176	0.552339	0.584767	0.521793	0.530019	0.537874	0.608366	0.46196	0.525208
Cell_0261	TFEB_TR	EAA 1.000000e-01 X + Insulin 10000 ng/ml	0.927374	0.648898	2.39044	0.962538	1.58731	0.848504	1.55504	1.50834	1.64661	1.42822	0.763582	1.46652	0.627352	1.85078	1.16997	2.14889	0.695692	1.54692	1.34856	2.75379	1.14396	1.84539	1.90745	1.2139	0.742974	1.22309	1.11458	1.08512	1.87092	0.994089	0.789371	0.883834	1.43125	0.906408	1.1172	1.60018	1.14257	0.964631	1.37335	0.92733	1.38307	0.558786	2.78843	1.63627	0.963774	1.07074	1.74887
Cell_0261	FOXO_TR	EAA 1.000000e-01 X + Insulin 10000 ng/ml	1.50981	1.42262	2.80303	2.14672	1.54599	3.40007	2.05752	2.02994	2.93845	1.21519	0.904468	2.89584	1.36248	2.47823	2.74895	1.86112	2.13864	2.06153	1.69092	2.59373	2.48487	1.4296	2.60219	2.26711	1.62588	2.3955	1.87697	2.32512	3.37149	1.49523	1.17051	2.85077	2.04021	1.0891	2.33368	3.02187	1.89088	2.78813	2.5444	1.918	3.61045	0.989866	2.16779	2.80361	1.4948	1.12877	2.67935
Cell_0261	AMPKARt2	EAA 1.000000e-01 X + Insulin 10000 ng/ml	0.583132	0.570111	0.493565	0.701513	0.541353	0.729954	0.698579	0.642478	0.591177	0.511723	0.56384	0.613946	0.61207	0.712589	0.500045	0.636577	0.643467	0.650386	0.522627	0.703149	0.63376	0.480262	0.419102	0.708905	0.577507	0.638495	0.661423	0.552307	0.68827	0.398618	0.619776	0.610424	0.628773	0.559797	0.631852	0.715641	0.628102	0.597269	0.616925	0.559232	0.58513	0.521363	0.535967	0.528712	0.606575	0.449775	0.518823
Cell_0262	TFEB_TR	EAA 1.000000e-01 X + Insulin 10000 ng/ml	0.972985	0.669701	2.23962	1.08336	1.72439	0.824752	1.62494	1.49899	1.59043	1.31538	0.729798	1.50594	0.646039	2.18869	1.212	2.18753	0.7314	1.0748	1.59009	2.49348	1.30624	1.86313	1.92851	0.791677	0.669122	1.37043	1.13238	1.05857	2.03115	1.0074	0.795538	0.8426	1.45107	0.908968	1.0188	1.72286	1.07901	1.0086	1.28987	0.883926	1.31405	0.557841	2.8751	1.56133	0.747579	1.06441	1.5287
Cell_0262	FOXO_TR	EAA 1.000000e-01 X + Insulin 10000 ng/ml	1.55827	1.49225	2.70576	2.24079	1.57408	3.52036	2.06157	2.35173	2.95884	1.22505	1.02749	2.86615	1.367	3.12884	2.77612	1.78137	2.26007	2.11537	1.63521	2.58302	2.42624	1.42914	2.76956	2.36491	1.63934	2.42193	2.02921	2.45444	3.33875	1.54829	1.19673	2.86246	2.1117	1.12766	2.27426	2.98772	1.80898	2.83768	2.38521	1.91759	3.70161	1.01361	2.16433	2.54399	1.45087	1.09576	2.7199
Cell_0262	AMPKARt2	EAA 1.000000e-01 X + Insulin 10000 ng/ml	0.581122	0.5753	0.488731	0.693266	0.536357	0.717359	0.697098	0.657331	0.596617	0.509637	0.544959	0.610605	0.610819	0.737495	0.506299	0.636085	0.656197	0.66471	0.500506	0.718663	0.634777	0.479209	0.404214	0.665238	0.572306	0.662962	0.677508	0.55454	0.675525	0.421504	0.621729	0.604886	0.637455	0.5625	0.647587	0.730061	0.630421	0.585903	0.61236	0.579382	0.599851	0.541877	0.532079	0.522844	0.591957	0.441192	0.529355
Cell_0263	TFEB_TR	EAA 1.000000e-01 X + Insulin 10000 ng/ml	1.08052	0.682805	2.72676	1.22051	1.80087	0.97653	1.65507	1.52452	1.48241	0.959236	0.785141	1.40971	0.650518	2.12083	1.20353	2.08022	0.754989	1.218	1.87342	2.39234	0.464161	1.89552	1.8988	0.797026	0.764314	1.52882	1.11246	1.04574	2.00746	1.09757	0.795953	0.895931	1.35	0.945074	1.02714	2.09217	1.04756	1.03276	1.41159	0.826388	1.25026	0.530315	2.75903	1.74309	1.00538	1.06612	1.83444
Cell_0263	FOXO_TR	EAA 1.000000e-01 X + Insulin 10000 ng/ml	1.59048	1.52443	2.62579	2.05627	1.52165	3.54046	2.09747	2.40036	3.06235	1.17818	1.53821	2.83597	1.38844	3.4595	2.69071	1.76578	2.09077	2.14221	1.55814	2.66098	1.73359	1.44884	2.83732	2.35652	1.64068	2.45004	2.11869	2.48667	3.30211	1.58696	1.20793	2.84626	2.18441	1.25079	2.35802	2.85387	1.70665	2.83836	2.40518	1.90389	3.51136	0.987823	2.14727	2.50926	1.4583	1.11626	2.77664
Cell_0263	AMPKARt2	EAA 1.000000e-01 X + Insulin 10000 ng/ml	0.608784	0.58407	0.487452	0.689166	0.533743	0.687278	0.69654	0.640751	0.601448	0.504124	0.564268	0.630795	0.606001	0.749804	0.517771	0.632248	0.648903	0.656224	0.50003	0.701175	0.535956	0.495688	0.406483	0.678938	0.583487	0.678315	0.682724	0.559946	0.67521	0.436342	0.613889	0.595343	0.639422	0.57687	0.660979	0.717024	0.628228	0.573563	0.615366	0.587592	0.599619	0.561794	0.535476	0.527894	0.586161	0.444855	0.541495
Cell_0264	TFEB_TR	EAA 1.000000e-01 X + Insulin 10000 ng/ml	1.19145	0.673709	3.23657	1.12147	1.77806	1.05542	1.83672	1.46525	1.55985	0.963687	0.815864	1.50475	0.657916	1.69933	1.31205	2.01441	0.761399	0.58203	1.69057	3.21948	0.436123	1.96378	1.84981	0.886307	0.79849	1.21267	1.0161	1.06845	1.76403	1.05211	0.784606	0.952646	1.28851	1.01265	0.980826	1.98417	1.06242	1.0756	1.47328	0.804003	1.27039	0.585368	2.87285	1.87594	1.23037	1.06654	2.36014
Cell_0264	FOXO_TR	EAA 1.000000e-01 X + Insulin 10000 ng/ml	1.57453	1.42787	2.57223	1.79233	1.73499	3.55408	2.51213	2.28215	2.99496	1.17388	1.95074	2.78557	1.38712	3.23463	2.57816	1.77445	2.1002	1.29662	1.54877	2.69799	1.83537	1.47788	2.80216	2.29244	1.6052	2.46461	2.11971	2.50824	3.27181	1.59623	1.20158	2.74237	2.1395	1.42439	2.31845	2.78025	1.70881	2.79553	2.5391	1.94665	3.28145	1.03375	2.16103	2.53381	1.53409	1.13597	2.8101
Cell_0264	AMPKARt2	EAA 1.000000e-01 X + Insulin 10000 ng/ml	0.62529	0.576877	0.479265	0.684891	0.547293	0.67369	0.705643	0.644472	0.605863	0.488601	0.590422	0.642395	0.60065	0.742979	0.524288	0.63599	0.646268	0.536616	0.515007	0.685349	0.539079	0.509887	0.402576	0.672207	0.593693	0.651983	0.682108	0.562357	0.693815	0.435017	0.617525	0.598128	0.629706	0.577064	0.666722	0.711785	0.62698	0.577601	0.632796	0.581468	0.58551	0.539576	0.524072	0.539431	0.596091	0.451965	0.544818
Cell_0265	TFEB_TR	EAA 1.000000e-01 X + Insulin 10000 ng/ml	1.25459	0.656309	3.17679	1.21666	1.76828	0.954008	2.05921	1.40196	1.57406	1.32903	0.873441	1.70148	0.672801	1.31771	1.22289	2.00533	0.745152	0.572232	1.50433	3.90785	0.444644	1.94887	1.83042	0.967922	0.729685	0.92719	1.02387	1.06285	1.64054	1.02603	0.783632	0.905453	1.39876	1.09467	0.944952	1.63481	1.07399	1.12257	1.37786	0.832247	1.34971	0.593247	2.93325	1.6231	1.02958	1.05059	2.5739
Cell_0265	FOXO_TR	EAA 1.000000e-01 X + Insulin 10000 ng/ml	1.50248	1.58653	2.60346	1.71374	2.32991	3.54025	2.92845	2.14779	2.88555	1.1754	1.9226	2.76608	1.36683	3.04107	1.19659	1.86655	2.17974	1.30512	1.57905	2.61753	1.8161	1.45527	2.76349	2.17067	1.6379	2.41353	2.10365	2.55428	3.19545	1.59106	1.2117	2.62944	2.02471	1.60792	2.22682	2.78267	1.77143	2.83231	2.49984	2.00552	3.23131	1.0727	2.15262	2.36036	1.54739	1.12978	2.79249
Cell_0265	AMPKARt2	EAA 1.000000e-01 X + Insulin 10000 ng/ml	0.618665	0.577019	0.476882	0.684355	0.56823	0.677432	0.691392	0.655632	0.607504	0.481733	0.574568	0.632629	0.603682	0.739087	0.3735	0.636648	0.651848	0.539542	0.527998	0.69224	0.556592	0.510657	0.42006	0.669542	0.608385	0.645895	0.686149	0.574122	0.691464	0.446284	0.627627	0.597796	0.632393	0.56943	0.653114	0.727828	0.623783	0.58657	0.638228	0.585075	0.589234	0.517256	0.515679	0.540347	0.59967	0.457639	0.544091
Cell_0266	TFEB_TR	EAA 1.000000e-01 X + Insulin 10000 ng/ml	1.32386	0.681141	2.69764	1.407	1.70475	0.847726	2.13052	1.59021	1.36096	1.28516	0.993203	0.687986	0.677626	1.32137	1.23913	1.95961	0.71367	0.596248	1.51004	3.52133	0.462772	1.85923	1.78289	1.01065	0.797231	1.23722	1.25244	1.04614	1.66006	1.15081	0.79332	0.819765	1.47188	1.19414	1.06451	1.41266	1.04433	1.20296	1.33856	0.814581	1.39329	0.545466	2.596	1.48693	0.980932	1.03881	2.74522
Cell_0266	FOXO_TR	EAA 1.000000e-01 X + Insulin 10000 ng/ml	1.45719	2.16845	2.63767	1.69919	2.75056	3.49384	2.86707	2.17881	2.8511	1.12519	1.86643	2.35509	1.36314	3.05902	1.20884	1.99755	2.07522	1.30455	1.58584	2.59936	1.84464	1.39646	2.67018	2.23775	1.65104	2.35618	2.18903	2.56724	3.15139	1.57801	1.21451	2.62571	2.05104	1.75958	2.29206	2.74724	1.77661	2.84301	2.37535	1.92344	3.12534	1.08626	2.20114	2.1223	1.52399	1.11425	2.77171
Cell_0266	AMPKARt2	EAA 1.000000e-01 X + Insulin 10000 ng/ml	0.607981	0.594411	0.489541	0.691866	0.580208	0.677494	0.665942	0.640356	0.602011	0.492625	0.541881	0.631476	0.599212	0.739342	0.412712	0.641566	0.64173	0.55808	0.519397	0.695716	0.569945	0.512483	0.44093	0.669898	0.614183	0.667487	0.686056	0.579991	0.670392	0.465101	0.629294	0.600569	0.654754	0.570395	0.633914	0.729334	0.625719	0.575489	0.632164	0.607316	0.599747	0.524462	0.539097	0.530742	0.594517	0.45693	0.545368
Cell_0267	TFEB_TR	EAA 1.000000e-01 X + Insulin 10000 ng/ml	1.3811	0.74198	2.20772	1.31874	1.41881	0.846819	2.22861	1.8395	1.5701	0.990622	1.01382	0.737725	0.679499	1.58614	1.26707	1.87879	0.697788	0.591216	1.50746	2.73851	0.472301	1.81866	1.69544	1.02248	0.881966	1.47009	1.41335	1.02198	1.64617	1.21291	0.795962	0.797029	1.44095	1.27629	1.1523	1.38942	0.984927	1.27311	1.40568	0.754841	1.36714	0.580615	2.55762	1.47898	1.10091	1.03611	2.37783
Cell_0267	FOXO_TR	EAA 1.000000e-01 X + Insulin 10000 ng/ml	1.48214	2.52323	2.5601	1.6211	2.76512	3.33237	2.71135	2.45738	1.92659	1.08686	1.96371	2.36014	1.35845	3.05136	1.26438	2.04141	2.01001	1.29307	1.6043	2.67407	1.93572	1.37206	2.51511	2.47002	1.56753	2.40274	2.26855	2.57069	3.16236	1.5401	1.19019	2.63837	2.1716	1.75794	2.38385	2.69415	1.79301	2.75372	2.41364	1.7946	3.02751	1.14744	2.32203	2.0892	1.57783	1.11115	2.83128
Cell_0267	AMPKARt2	EAA 1.000000e-01 X + Insulin 10000 ng/ml	0.603994	0.598469	0.494258	0.686942	0.574691	0.671245	0.669128	0.636872	0.673705	0.493744	0.530881	0.634641	0.58263	0.736244	0.45257	0.644908	0.627313	0.56585	0.505852	0.684861	0.565219	0.515233	0.435582	0.659288	0.596858	0.667255	0.680235	0.568738	0.664469	0.473014	0.632738	0.606872	0.661423	0.555998	0.636007	0.729051	0.63549	0.561398	0.641886	0.614779	0.59333	0.528145	0.554513	0.535638	0.58717	0.451026	0.54431
Cell_0268	TFEB_TR	EAA 1.000000e-01 X + Insulin 10000 ng/ml	1.34548	0.765199	2.22322	1.2413	1.14183	0.748631	2.48611	1.86544	1.65787	1.01892	0.938682	0.723863	0.68169	1.80003	1.28084	1.86377	0.692009	0.56289	1.58689	2.61173	0.489298	1.80788	1.64951	1.05169	0.786486	1.26865	1.34288	0.941579	1.68936	1.11453	0.789765	0.811686	1.52123	1.28239	1.05914	2.01662	0.972388	1.2571	1.36764	0.741915	1.31341	0.613874	2.6954	1.24206	1.02438	1.02925	1.88838
Cell_0268	FOXO_TR	EAA 1.000000e-01 X + Insulin 10000 ng/ml	1.49685	2.30234	2.55096	1.52184	2.74737	1.21618	2.84555	2.49471	1.97909	1.09017	1.95867	2.28848	1.31567	3.08285	1.27133	2.02026	2.05631	1.29405	1.64755	2.70189	1.97978	1.37108	2.49785	2.49543	1.55197	2.43593	2.18046	2.59544	3.13377	1.5039	1.18201	2.54452	2.13871	1.57671	2.35851	2.68621	1.92897	2.69393	2.46144	1.76174	3.1723	1.17981	2.44674	2.15362	1.6513	1.13926	2.91853
Cell_0268	AMPKARt2	EAA 1.000000e-01 X + Insulin 10000 ng/ml	0.601944	0.590965	0.486903	0.679472	0.554556	0.561689	0.682384	0.65578	0.672467	0.475526	0.53708	0.654651	0.579267	0.731626	0.461776	0.633834	0.630376	0.559858	0.519622	0.676291	0.555075	0.507768	0.428423	0.660912	0.593736	0.666009	0.678737	0.570751	0.664337	0.463981	0.637993	0.601491	0.641025	0.532983	0.646083	0.743331	0.636153	0.575453	0.643243	0.58707	0.586352	0.51998	0.542634	0.553391	0.576051	0.446245	0.534375
Cell_0269	TFEB_TR	EAA 1.000000e-01 X + Insulin 10000 ng/ml	1.28377	0.759757	0.83053	1.3725	1.29025	0.780666	2.53797	1.89654	1.6185	0.929128	0.981464	0.803391	0.667882	1.75023	1.28181	1.95198	0.673162	0.579899	1.67887	3.17399	0.489852	1.76387	1.61344	1.1902	0.713888	1.28373	1.25731	0.925129	1.72837	1.11549	0.779966	0.806758	1.72779	1.23546	1.08783	2.53985	1.00961	1.27528	1.35475	0.739102	1.30202	0.587874	2.43476	1.19746	1.06001	1.04603	2.36931
Cell_0269	FOXO_TR	EAA 1.000000e-01 X + Insulin 10000 ng/ml	1.46851	2.12875	2.38786	1.45591	2.83913	1.28636	2.87255	2.20729	1.95661	1.09512	1.91969	2.18233	1.26811	3.16093	1.24745	1.9901	2.02579	1.29613	1.63079	2.64825	2.03131	1.3496	2.65245	2.38335	1.62357	2.34156	2.10397	2.61536	3.06202	1.51054	1.18259	2.38902	2.04991	1.36903	2.29458	2.71573	2.02684	2.64843	2.37179	1.77435	3.29218	1.13189	2.56662	2.10099	1.64202	1.13818	2.91457
Cell_0269	AMPKARt2	EAA 1.000000e-01 X + Insulin 10000 ng/ml	0.597876	0.60065	0.466927	0.691101	0.541387	0.572442	0.678726	0.657878	0.66536	0.47408	0.543069	0.672879	0.587621	0.732315	0.457456	0.637541	0.636091	0.560127	0.531661	0.677625	0.552409	0.504814	0.432618	0.671646	0.615335	0.678593	0.669744	0.578115	0.66392	0.449098	0.634005	0.600012	0.636035	0.538107	0.650048	0.736581	0.629635	0.589225	0.61087	0.566807	0.594967	0.515592	0.544974	0.558312	0.569617	0.436004	0.524404
Cell_0270	TFEB_TR	EAA 1.000000e-01 X + Insulin 10000 ng/ml	1.29012	0.796833	0.804013	1.38774	1.55379	0.756001	2.26448	2.04958	1.56329	0.653804	1.12268	0.889138	0.647011	1.51758	1.30404	2.02263	0.656751	0.59707	1.64704	3.73051	0.465976	1.72914	1.6133	1.25436	0.774709	1.39401	1.273	1.04402	1.6198	1.20209	0.773023	0.797254	1.8506	1.20565	1.32851	1.93423	1.00307	1.36949	1.5979	0.708652	1.3454	0.596068	2.14595	1.41127	1.202	1.07544	2.74166
Cell_0270	FOXO_TR	EAA 1.000000e-01 X + Insulin 10000 ng/ml	1.46855	2.39379	2.44872	1.45608	2.89516	1.29844	2.53577	2.32129	1.92044	1.10157	1.99254	2.12627	1.27335	3.10798	1.27248	1.9504	1.97709	1.26661	1.58885	2.62264	2.04099	1.32569	2.78804	2.42107	1.64162	2.2687	2.19778	2.61384	3.00619	1.52008	1.16716	2.25035	2.11837	1.23738	2.3249	2.74558	2.01126	2.56319	2.32905	1.80803	3.22355	1.08981	2.53541	2.0068	1.60786	1.07879	2.85051
Cell_0270	AMPKARt2	EAA 1.000000e-01 X + Insulin 10000 ng/ml	0.599687	0.606195	0.464141	0.695471	0.54151	0.57558	0.671924	0.655477	0.663081	0.498103	0.549044	0.663615	0.59188	0.736792	0.472996	0.658595	0.633974	0.564886	0.520075	0.678667	0.557945	0.514617	0.441924	0.667005	0.611348	0.675422	0.660068	0.569831	0.675729	0.458833	0.630587	0.610524	0.65468	0.557242	0.654329	0.7118	0.632399	0.574178	0.595518	0.58286	0.599729	0.517137	0.555117	0.556602	0.563372	0.422097	0.5248
Cell_0271	TFEB_TR	EAA 1.000000e-01 X + Insulin 10000 ng/ml	1.33455	0.852197	0.78358	1.14373	1.50105	0.747804	2.07175	2.02781	1.62623	0.905439	1.11778	0.881829	0.632863	1.46908	1.32451	1.96374	0.659215	0.566778	1.59783	4.17108	0.471234	1.71508	1.7391	1.07839	0.777602	1.10876	1.34011	1.09442	1.55541	1.08676	0.775082	0.807141	1.78737	1.19006	1.33483	1.57105	0.97159	1.39238	1.7228	0.728932	1.37555	0.627721	2.19747	1.28238	1.10668	1.04975	2.39691
Cell_0271	FOXO_TR	EAA 1.000000e-01 X + Insulin 10000 ng/ml	1.5265	2.71043	2.4583	1.46265	2.90389	1.26356	2.21345	2.80462	1.91202	1.11952	2.03316	2.13844	1.29714	3.05633	1.29138	1.88098	1.9917	1.23545	1.64753	2.63015	1.94816	1.31734	2.84351	2.47634	1.64455	2.32893	2.27751	2.61798	2.9767	1.51125	1.16706	2.20829	2.1644	1.1681	2.4638	2.71015	2.07569	2.52869	2.36433	1.83227	3.28055	1.0929	2.36269	1.99926	1.61377	1.09992	2.83928
Cell_0271	AMPKARt2	EAA 1.000000e-01 X + Insulin 10000 ng/ml	0.606896	0.585974	0.489794	0.688101	0.527238	0.580038	0.670281	0.668563	0.674816	0.509958	0.556797	0.644959	0.600508	0.734195	0.478656	0.660894	0.638171	0.570929	0.528723	0.677069	0.567376	0.517345	0.455354	0.667907	0.586943	0.672969	0.673543	0.567507	0.681498	0.480557	0.631104	0.608824	0.649583	0.56465	0.652282	0.711938	0.637174	0.558254	0.624288	0.592523	0.586134	0.515045	0.545242	0.565322	0.550781	0.439422	0.533167
Cell_0272	TFEB_TR	EAA 1.000000e-01 X + Insulin 10000 ng/ml	1.37752	0.861294	0.782079	0.968294	1.55547	0.751187	2.00808	1.84685	1.65486	1.30467	0.978071	0.936761	0.620773	1.65212	1.32071	1.77799	0.666487	0.563219	1.65631	4.38874	0.485514	1.67348	1.83613	0.941943	0.729651	1.03864	1.32329	1.02427	1.59856	0.925369	0.77258	0.815433	1.68506	1.16518	1.07663	2.23888	0.970141	1.33588	1.51257	0.784251	1.37284	0.677104	2.41802	1.14672	1.05872	1.02781	2.33958
Cell_0272	FOXO_TR	EAA 1.000000e-01 X + Insulin 10000 ng/ml	1.57524	2.81443	2.46251	1.42984	2.88906	1.20465	2.11149	2.8719	1.88001	1.13351	2.00526	2.20997	1.2938	3.14836	1.28126	1.76845	1.99877	1.24193	1.72494	2.59658	1.94063	1.30692	2.86008	2.46874	1.69148	2.39888	2.21866	2.65478	2.99318	1.52723	1.16354	2.30881	2.03668	1.16236	2.491	2.64933	2.15865	2.52087	2.3505	1.83426	3.48493	1.11078	2.52367	2.04128	1.61426	1.2948	2.90705
Cell_0272	AMPKARt2	EAA 1.000000e-01 X + Insulin 10000 ng/ml	0.606325	0.583242	0.505522	0.695126	0.506078	0.590115	0.667418	0.669182	0.682106	0.506049	0.543374	0.646303	0.609348	0.732097	0.460432	0.654904	0.64555	0.574322	0.549725	0.682129	0.57649	0.509355	0.460155	0.678454	0.594497	0.673561	0.68361	0.566312	0.672006	0.479972	0.626892	0.600324	0.622762	0.568853	0.651869	0.731038	0.641066	0.545622	0.640723	0.579687	0.583384	0.498167	0.546571	0.576186	0.549831	0.489649	0.544288
Cell_0273	TFEB_TR	EAA 1.000000e-01 X + Insulin 10000 ng/ml	1.38192	0.845271	0.790395	1.08547	1.8665	0.735221	1.83468	1.83215	1.59432	1.12573	0.946519	0.935851	0.622302	1.67632	1.33778	1.59106	0.670847	0.604279	1.90987	3.69955	0.457411	1.62442	1.80859	1.02131	0.762415	1.41746	1.2516	1.01239	1.61311	0.984955	0.752722	0.80759	1.6794	1.1414	1.0539	2.11329	0.937079	1.32483	1.45401	0.768451	1.38663	0.741532	2.43023	1.55162	1.13353	1.13179	2.35654
Cell_0273	FOXO_TR	EAA 1.000000e-01 X + Insulin 10000 ng/ml	1.53936	2.81434	2.46075	1.43062	2.79999	1.19114	2.02585	2.63229	1.85256	1.13968	2.03263	2.28035	1.31948	3.18328	1.29043	1.69771	2.03507	1.26843	1.71856	2.61105	2.02487	1.30499	2.82559	2.57768	1.68636	2.41306	2.13719	2.68206	3.06919	1.53323	1.13261	2.40048	1.91969	1.15874	2.33687	2.66349	2.10928	2.44184	2.35447	2.03968	3.49679	1.11176	3.06827	2.06507	1.60525	1.53987	3.00493
Cell_0273	AMPKARt2	EAA 1.000000e-01 X + Insulin 10000 ng/ml	0.600731	0.604543	0.482346	0.702672	0.511732	0.596253	0.665064	0.656207	0.677097	0.513264	0.5184	0.654167	0.610009	0.739514	0.455067	0.658661	0.644032	0.563312	0.534401	0.689718	0.577749	0.505293	0.451659	0.669616	0.613438	0.649871	0.669588	0.558484	0.669499	0.486322	0.630527	0.600252	0.625158	0.572336	0.662957	0.741261	0.654863	0.522593	0.624864	0.584899	0.611631	0.490793	0.566566	0.579473	0.551399	0.504631	0.551051
Cell_0274	TFEB_TR	EAA 1.000000e-01 X + Insulin 10000 ng/ml	1.32611	0.844723	0.785963	1.1008	1.88472	0.776277	1.67675	1.95299	1.63405	0.957139	1.01742	0.838186	0.642476	1.38709	1.36624	1.63804	0.68417	0.616949	2.00865	2.67776	0.451975	1.61956	1.78947	1.12199	0.773872	1.40338	1.50341	1.0532	1.58017	1.04954	0.738372	0.820269	1.73031	1.082	1.28321	1.6244	0.9004	1.40303	1.64275	0.741585	1.39074	0.71532	2.13433	1.8171	1.06081	1.28859	2.50512
Cell_0274	FOXO_TR	EAA 1.000000e-01 X + Insulin 10000 ng/ml	1.44762	2.73714	2.48141	1.45407	2.67349	1.25477	1.90462	2.68957	1.91195	1.13706	2.11718	2.23836	1.39347	3.06746	1.29445	1.78328	2.09718	1.28311	1.73494	2.70177	1.99235	1.31231	2.75768	2.70301	1.6437	2.44071	2.09927	2.64896	3.10975	1.49869	1.1236	2.38209	1.92768	1.0633	2.31949	2.66592	2.22129	2.3653	2.4071	2.50622	3.36463	1.06755	3.36254	2.08539	1.61809	1.64077	3.04488
Cell_0274	AMPKARt2	EAA 1.000000e-01 X + Insulin 10000 ng/ml	0.599407	0.597078	0.46489	0.702184	0.526345	0.597415	0.669688	0.657178	0.681354	0.524179	0.531589	0.65416	0.614537	0.741647	0.461565	0.655298	0.643335	0.54669	0.518451	0.694767	0.563732	0.504654	0.444422	0.660789	0.603169	0.639007	0.658473	0.569854	0.674422	0.515548	0.641922	0.592763	0.653909	0.571628	0.661016	0.739454	0.667736	0.518141	0.624174	0.600498	0.627451	0.512203	0.570814	0.582231	0.539308	0.472174	0.555866
Cell_0275	TFEB_TR	EAA 1.000000e-01 X + Insulin 10000 ng/ml	1.29241	0.856126	0.775166	0.839749	1.73736	0.840252	1.65798	1.87634	1.68809	1.21758	1.02319	0.972005	0.651906	1.21196	1.37581	1.92179	0.702844	0.608611	1.59985	2.45203	0.501227	1.63641	1.74729	1.14107	0.712379	1.08434	1.84309	1.04901	1.47545	0.961323	0.744723	0.849072	1.88878	0.992523	1.33958	3.0604	0.9653	1.46431	1.6712	0.82452	1.35003	0.655645	2.07228	1.46817	1.08338	1.3858	1.16565
Cell_0275	FOXO_TR	EAA 1.000000e-01 X + Insulin 10000 ng/ml	1.39592	2.64922	2.56858	1.45942	2.64326	1.27593	1.88269	2.76925	2.01584	1.11843	2.18922	2.12123	1.44826	2.97554	1.29299	1.98981	2.07734	1.27859	1.776	2.71173	1.90637	1.29988	2.70376	2.68129	1.67776	2.43973	2.04064	2.58697	3.06839	1.49306	1.12098	2.38209	2.00868	1.07586	2.47732	2.59057	2.62261	2.3709	2.37824	2.82471	3.41904	0.998092	3.2806	2.14841	1.61646	1.59206	2.11579
Cell_0275	AMPKARt2	EAA 1.000000e-01 X + Insulin 10000 ng/ml	0.600466	0.578554	0.484311	0.7067	0.529612	0.593964	0.680772	0.660555	0.690702	0.522293	0.552468	0.657408	0.613548	0.740898	0.452543	0.645955	0.6426	0.537018	0.542013	0.701455	0.545917	0.503981	0.448821	0.669839	0.592457	0.661109	0.65582	0.575312	0.672466	0.522878	0.636342	0.583236	0.667038	0.579684	0.648219	0.730026	0.668115	0.531675	0.640738	0.59517	0.608403	0.528334	0.569307	0.599412	0.546659	0.462552	0.671705
Cell_0276	TFEB_TR	EAA 1.000000e-01 X + Insulin 10000 ng/ml	1.31665	0.874582	0.776284	0.939198	1.87443	0.815764	1.62047	1.61962	1.62655	1.23213	1.02021	1.05279	0.647497	1.42076	1.42116	2.07541	0.704378	0.624578	1.35708	2.37903	0.520109	1.62364	1.67483	1.15038	0.697776	1.20758	1.69462	1.03063	1.47941	0.970245	0.746623	0.824708	2.06933	0.994761	1.14863	4.28054	1.05147	1.4366	1.66154	0.923627	1.35313	0.687138	2.35055	0.574101	1.20105	1.49466	1.97706
Cell_0276	FOXO_TR	EAA 1.000000e-01 X + Insulin 10000 ng/ml	1.39258	2.71723	2.60105	1.48386	2.70614	1.2058	1.91542	2.47215	2.07535	1.1018	2.24098	2.0787	1.47925	3.00448	1.32664	2.15144	2.05102	1.27842	1.76133	2.67703	1.88337	1.29984	2.69348	2.66236	1.63752	2.39666	2.00112	2.55796	3.08541	1.50349	1.13385	2.41183	2.07672	1.40299	2.4684	2.56975	2.90497	2.38598	2.27785	2.75057	3.5627	0.9745	3.22864	1.73488	1.60576	1.66613	2.19162
Cell_0276	AMPKARt2	EAA 1.000000e-01 X + Insulin 10000 ng/ml	0.603278	0.589072	0.495637	0.704344	0.534974	0.579358	0.685343	0.651179	0.686139	0.519876	0.527422	0.65919	0.598921	0.748592	0.436017	0.639929	0.62714	0.5306	0.560959	0.697934	0.539888	0.508923	0.462126	0.66603	0.599495	0.67186	0.657833	0.549831	0.672005	0.504652	0.627839	0.587502	0.655833	0.600653	0.642115	0.726069	0.664834	0.529233	0.636186	0.591656	0.60837	0.533785	0.574856	0.736273	0.57435	0.475977	0.690741
Cell_0277	TFEB_TR	EAA 1.000000e-01 X + Insulin 10000 ng/ml	1.32812	0.89206	0.781064	1.42708	2.09955	0.761475	1.51563	1.61037	1.6133	1.03228	1.1227	0.721294	0.656723	1.524	1.50007	1.93671	0.693972	0.648713	1.7254	2.07657	0.50972	1.59755	1.7361	1.27199	0.728513	1.4015	1.65437	1.02474	1.74511	1.11486	0.742445	0.784482	2.02689	1.08822	0.994047	2.61658	1.04415	1.47935	1.87702	0.907951	1.48016	0.71398	2.28305	0.621174	1.08317	1.61096	1.45656
Cell_0277	FOXO_TR	EAA 1.000000e-01 X + Insulin 10000 ng/ml	1.38779	2.83865	2.51865	1.44331	2.73599	1.14217	1.86944	2.28425	2.07496	1.10759	2.27941	2.12915	1.50227	3.08065	1.35584	2.17123	2.10944	1.30026	1.79358	2.76142	1.8452	1.3038	2.72211	2.65564	1.45174	2.44975	2.10895	2.61511	3.15081	1.46097	1.33939	2.37823	2.04497	1.68745	2.32025	2.62799	2.96324	2.37424	2.23683	2.59249	1.75672	1.00524	3.22656	1.87735	1.62556	1.95924	2.23685
Cell_0277	AMPKARt2	EAA 1.000000e-01 X + Insulin 10000 ng/ml	0.602493	0.592142	0.480905	0.696177	0.535193	0.579154	0.680988	0.65265	0.677882	0.522807	0.507763	0.655966	0.599894	0.749158	0.432088	0.636666	0.615638	0.53495	0.543461	0.68361	0.541082	0.512763	0.465506	0.652481	0.59765	0.669455	0.66751	0.549946	0.678057	0.495122	0.645295	0.591209	0.642379	0.616222	0.625067	0.733108	0.663468	0.529123	0.625024	0.597003	0.471458	0.536449	0.568935	0.685217	0.575589	0.475052	0.679432
Cell_0278	TFEB_TR	EAA 1.000000e-01 X + Insulin 10000 ng/ml	1.31011	0.902014	0.780332	1.47367	2.26488	0.747336	1.47494	1.8342	1.62317	1.30364	1.2364	0.65223	0.668357	1.52536	1.56196	1.80943	0.697664	0.669613	1.96315	2.44183	0.544937	1.60937	1.84123	1.48703	0.78865	1.18954	2.09732	1.02923	1.88008	1.09134	0.759411	0.811606	2.02793	1.14528	1.01169	1.29177	1.01474	0.818637	1.95733	0.869885	1.48173	0.688825	1.84042	0.781508	1.06007	1.5947	1.55048
Cell_0278	FOXO_TR	EAA 1.000000e-01 X + Insulin 10000 ng/ml	1.3876	2.86651	2.43619	1.32708	2.75871	1.1277	1.81603	2.48671	2.04251	1.11886	2.24383	2.18496	1.5071	3.11749	1.35698	2.13382	2.1431	1.31219	1.88197	2.87077	1.82202	1.26235	2.7319	2.48291	1.56365	2.54573	2.27015	2.76716	3.06341	1.41781	1.75616	2.30801	1.97505	1.6242	2.30407	2.65876	3.05505	2.32889	2.25546	2.65823	1.8126	0.994697	3.1522	1.88955	1.6264	2.09325	2.29424
Cell_0278	AMPKARt2	EAA 1.000000e-01 X + Insulin 10000 ng/ml	0.594566	0.578203	0.488336	0.700447	0.51936	0.615666	0.682712	0.66636	0.673188	0.512595	0.517546	0.65652	0.616336	0.745359	0.441903	0.644861	0.625151	0.551507	0.515722	0.68694	0.544709	0.507588	0.450678	0.652791	0.594676	0.671485	0.665311	0.590151	0.676348	0.498902	0.665759	0.593227	0.645674	0.612393	0.61902	0.731547	0.66096	0.70944	0.633661	0.584146	0.521882	0.505927	0.559269	0.694382	0.560141	0.486302	0.680531
Cell_0279	TFEB_TR	EAA 1.000000e-01 X + Insulin 10000 ng/ml	1.28437	0.917204	0.78566	1.1493	2.32619	0.744466	1.53278	1.8291	1.55218	1.5044	1.20978	1.04766	0.66649	1.95513	1.66314	1.88232	0.710311	0.694002	1.86753	2.99625	0.587871	1.67074	1.85622	1.50544	0.907826	1.04836	2.07387	1.07625	1.75649	0.940424	0.780542	0.830822	2.18699	1.16874	2.18155	2.49824	1.05575	0.804872	1.67601	0.895264	1.40606	0.691814	1.63171	0.825282	1.32376	1.48359	2.24086
Cell_0279	FOXO_TR	EAA 1.000000e-01 X + Insulin 10000 ng/ml	1.40815	2.90158	2.39036	1.35192	2.82273	1.16726	1.84673	2.5876	2.02989	1.14273	2.10743	2.19325	1.50739	3.11385	1.36699	2.10071	2.11252	1.2942	1.9752	2.83462	1.87239	1.38298	2.72325	2.23729	2.08825	2.51143	2.31832	2.89157	2.92251	1.42334	2.13033	2.19517	1.96457	1.54316	1.36264	2.64561	3.11449	2.28588	2.25075	2.77569	1.81811	0.909647	3.04365	1.80978	1.59295	1.85932	2.28116
Cell_0279	AMPKARt2	EAA 1.000000e-01 X + Insulin 10000 ng/ml	0.595753	0.578193	0.511602	0.707661	0.501672	0.635402	0.687105	0.655249	0.670545	0.493423	0.505672	0.649253	0.612582	0.75013	0.445557	0.65487	0.628893	0.557694	0.506256	0.701917	0.548326	0.515344	0.441554	0.651531	0.611409	0.662566	0.65834	0.601706	0.674665	0.505144	0.661251	0.599636	0.651858	0.59803	0.568792	0.721558	0.651474	0.710537	0.640967	0.568711	0.516359	0.482424	0.558142	0.699073	0.562503	0.504165	0.694141
Cell_0280	TFEB_TR	EAA 1.000000e-01 X + Insulin 10000 ng/ml	1.29064	0.920654	0.795964	1.0408	2.04215	0.771386	1.58936	1.74946	1.59551	1.0635	1.10144	1.12465	0.678147	2.14722	1.82599	1.94802	0.714967	0.717718	2.0042	2.78822	0.584725	1.79356	1.86515	1.29641	0.958967	1.22397	1.57644	1.12628	1.78325	0.952881	0.779297	0.811231	1.97742	1.19037	1.73004	2.8843	1.1177	0.904645	1.44628	0.891591	1.41988	0.689802	1.68879	0.730847	1.33381	1.37444	1.80074
Cell_0280	FOXO_TR	EAA 1.000000e-01 X + Insulin 10000 ng/ml	1.4412	2.89298	2.41531	1.46876	2.8232	1.23498	1.86698	2.57125	2.03896	1.19234	1.99893	2.17074	1.46101	3.11108	1.37365	2.03906	2.10973	1.2844	2.27723	2.7137	1.88758	1.87619	2.72075	2.08525	2.43555	2.41641	2.32462	2.88154	2.92714	1.43984	2.35201	1.39482	1.96588	1.58542	1.44689	2.61064	3.05083	2.19752	2.23869	2.70561	1.8696	0.869142	2.86669	1.73809	1.58624	1.57498	2.215
Cell_0280	AMPKARt2	EAA 1.000000e-01 X + Insulin 10000 ng/ml	0.606861	0.5726	0.504487	0.708774	0.497994	0.605584	0.68537	0.628023	0.678021	0.49775	0.490482	0.642671	0.593897	0.741544	0.434948	0.65427	0.623765	0.554008	0.524946	0.698293	0.541686	0.552922	0.447645	0.648584	0.623308	0.647739	0.666311	0.572186	0.688981	0.501134	0.646997	0.488619	0.639068	0.586224	0.571375	0.724418	0.637571	0.719978	0.638737	0.573486	0.499927	0.508227	0.560113	0.679972	0.568479	0.500846	0.686457
Cell_0281	TFEB_TR	EAA 1.000000e-01 X + Insulin 10000 ng/ml	1.34874	0.898477	0.805225	0.874287	1.72619	0.831148	1.62004	1.94949	1.76711	0.959178	1.09418	1.04443	0.701579	1.92547	1.92525	1.925	0.71432	0.756817	2.20232	2.28266	0.591296	1.98524	1.83748	1.17991	0.882539	1.33566	1.48625	1.08243	1.30367	0.984942	0.776903	0.913538	1.59989	1.15969	1.69974	1.49759	1.09663	0.985769	1.43989	0.852448	1.44918	0.666317	1.70145	0.704362	1.05069	1.25417	1.46969
Cell_0281	FOXO_TR	EAA 1.000000e-01 X + Insulin 10000 ng/ml	1.45335	2.74693	2.58228	1.44578	2.78924	1.24296	1.90183	2.7938	2.04161	1.17907	2.02036	2.16926	1.47896	3.14421	1.37081	2.10372	2.14849	1.29847	2.76621	2.62442	1.84988	2.48098	2.6649	2.02091	2.42714	2.37175	2.31418	2.84234	1.34193	1.46581	2.48757	1.47767	1.97848	1.49823	1.55136	2.57278	3.02764	2.12251	2.28192	2.59105	1.93868	0.930744	2.6741	1.67183	1.59061	1.50709	2.25874
Cell_0281	AMPKARt2	EAA 1.000000e-01 X + Insulin 10000 ng/ml	0.606521	0.563179	0.495353	0.71034	0.508424	0.588599	0.68829	0.624382	0.683848	0.515821	0.493696	0.661836	0.593074	0.726015	0.44042	0.658421	0.638774	0.555118	0.558189	0.691865	0.528487	0.588158	0.451888	0.660394	0.611318	0.646297	0.665919	0.559318	0.552525	0.486918	0.642236	0.497967	0.63424	0.576889	0.580736	0.731851	0.637763	0.720879	0.63896	0.582985	0.508962	0.504553	0.568586	0.686341	0.565925	0.508124	0.682881
Cell_0282	TFEB_TR	EAA 1.000000e-01 X + Insulin 10000 ng/ml	1.35066	0.905098	0.838727	0.64565	1.83521	0.886684	1.64793	2.03755	1.82566	1.41227	1.12503	1.39504	0.698143	2.50192	1.89114	1.97219	0.711434	0.800262	2.10854	1.96657	0.623471	2.15919	1.80237	1.20246	0.840259	0.635324	1.64203	1.01743	1.30689	0.877947	0.779598	0.937641	1.70453	1.11608	1.69422	1.13739	1.01279	1.03271	1.41723	0.865741	1.39366	0.68599	1.73206	0.716187	1.02898	1.20484	2.09469
Cell_0282	FOXO_TR	EAA 1.000000e-01 X + Insulin 10000 ng/ml	1.42379	2.73614	2.74493	1.40714	2.83264	1.21989	2.04172	2.8844	2.0951	1.11246	2.07203	2.17572	1.88307	3.24745	1.40879	2.40728	2.18309	1.30807	3.01994	2.5413	1.86754	2.86454	2.60703	2.07048	2.42596	1.52159	2.24309	2.88472	1.33804	1.50526	2.51134	1.42376	2.06547	1.39533	1.56794	2.54678	3.0156	2.14998	2.32165	2.55257	1.90991	0.975867	2.53997	1.5985	1.56704	1.58091	2.38153
Cell_0282	AMPKARt2	EAA 1.000000e-01 X + Insulin 10000 ng/ml	0.600058	0.58502	0.514293	0.710641	0.514854	0.607882	0.687983	0.618598	0.674965	0.510316	0.479308	0.678278	0.610763	0.737848	0.454385	0.663133	0.652075	0.551666	0.574626	0.70324	0.522285	0.584872	0.456188	0.667966	0.598264	0.615296	0.65364	0.574224	0.557834	0.486631	0.644342	0.49755	0.655152	0.573098	0.579647	0.725935	0.654763	0.721447	0.632832	0.58822	0.517649	0.462269	0.569603	0.699828	0.568998	0.518867	0.700476
Cell_0283	TFEB_TR	EAA 1.000000e-01 X + Insulin 10000 ng/ml	1.28912	0.95729	0.899737	0.980007	2.02406	0.937062	1.64681	1.80873	1.82087	1.29975	1.04445	1.72435	0.680539	3.14815	1.85302	1.96714	0.710796	0.799546	2.04176	1.90804	0.622884	2.23256	0.645723	1.25621	0.883653	0.647275	1.73933	1.08438	1.41189	0.916653	0.765475	0.969329	1.9814	1.12272	1.86378	1.92968	1.00478	1.07575	1.4063	0.880329	1.4403	0.717596	1.87174	0.697163	1.20913	1.2489	2.15248
Cell_0283	FOXO_TR	EAA 1.000000e-01 X + Insulin 10000 ng/ml	1.42414	2.92063	2.74517	1.45794	2.89544	1.22515	2.10562	2.58073	2.17343	1.24968	2.03188	2.13485	2.48943	3.38894	1.49416	2.62198	2.18048	1.31631	2.9813	2.45814	1.9443	3.00855	1.72132	2.22253	2.48231	1.41308	2.28553	2.93087	1.3366	1.51075	2.44578	1.36652	2.15181	1.42739	1.49085	2.46642	2.95775	2.22014	2.26592	2.50371	1.8513	0.940091	2.45191	1.56855	1.53386	1.62137	2.47848
Cell_0283	AMPKARt2	EAA 1.000000e-01 X + Insulin 10000 ng/ml	0.603067	0.605654	0.524688	0.708797	0.518524	0.612254	0.673781	0.581705	0.668815	0.502995	0.474871	0.669744	0.622183	0.750914	0.427289	0.658449	0.63482	0.548361	0.569099	0.710765	0.525577	0.553771	0.567699	0.66419	0.598256	0.62559	0.649632	0.574442	0.566442	0.50344	0.645058	0.492023	0.656487	0.580663	0.57521	0.720381	0.666104	0.731851	0.63025	0.589798	0.516358	0.450619	0.547587	0.694566	0.577671	0.501513	0.71169
Cell_0284	TFEB_TR	EAA 1.000000e-01 X + Insulin 10000 ng/ml	1.27219	0.987514	0.945529	1.4133	1.90069	0.941371	1.70282	1.75039	1.91663	0.884598	1.01108	1.83388	0.686886	2.53977	1.94523	1.78171	0.712898	0.783622	2.08576	0.59392	0.615166	2.24394	0.661776	1.27839	0.905867	0.657922	1.81769	1.18699	1.47144	1.10786	0.750305	0.995195	1.96981	1.13016	2.06659	2.24829	1.08377	1.03922	1.43223	0.858723	1.52079	0.702155	1.85087	0.704814	1.14251	1.2278	1.88807
Cell_0284	FOXO_TR	EAA 1.000000e-01 X + Insulin 10000 ng/ml	1.41678	2.95176	2.70156	1.41942	2.99964	1.1913	2.1435	2.38849	2.15756	1.68809	1.93117	2.0856	2.74239	3.46479	1.57213	2.51265	2.15626	1.33835	2.95538	1.12954	1.99505	2.94096	1.66704	2.30051	2.50798	1.36528	2.39178	2.92586	1.40177	1.47352	2.40957	1.37639	2.10702	1.36798	1.44437	2.34046	3.02515	2.2215	2.18073	2.53655	1.84208	0.904966	2.55224	1.56547	1.48483	1.60628	2.50794
Cell_0284	AMPKARt2	EAA 1.000000e-01 X + Insulin 10000 ng/ml	0.604166	0.592388	0.519227	0.704264	0.535413	0.594662	0.677581	0.557213	0.668263	0.523623	0.502947	0.665073	0.618531	0.736209	0.394728	0.661153	0.626781	0.561082	0.562537	0.604687	0.53115	0.525539	0.576618	0.665705	0.598596	0.629597	0.646033	0.558191	0.587729	0.515789	0.645118	0.492191	0.634223	0.587214	0.589254	0.729972	0.661193	0.732536	0.642716	0.586007	0.513488	0.423369	0.532522	0.697133	0.586352	0.493564	0.711986
Cell_0285	TFEB_TR	EAA 1.000000e-01 X + Insulin 10000 ng/ml	1.22267	0.982774	0.980763	1.22552	1.64459	0.913965	1.82719	2.00739	1.95376	1.07267	1.10716	2.0298	0.704835	2.0108	2.06592	1.69827	0.936489	0.790848	2.01879	0.602852	0.644968	2.22634	0.680492	1.12314	0.915408	0.676119	1.61915	1.12522	1.42118	1.10517	0.752953	1.07879	1.83113	1.11719	1.90362	2.07189	1.1262	1.0552	1.36688	0.876445	1.45504	0.674126	1.59844	0.703921	1.00787	1.19289	2.06758
Cell_0285	FOXO_TR	EAA 1.000000e-01 X + Insulin 10000 ng/ml	1.31569	2.85732	2.72284	1.39611	3.16898	1.16033	2.54968	2.46264	2.1215	2.18307	1.8607	2.10843	2.74498	3.41892	1.57411	2.34065	1.61181	1.33598	2.96002	1.12102	1.96394	2.74018	1.65562	2.21829	2.58342	1.36022	2.31323	2.93296	1.41706	1.42391	2.38101	1.37601	1.95516	1.22518	1.43744	2.34941	3.18383	2.22659	2.15018	2.66708	1.83065	0.904538	2.78794	1.52556	1.41254	1.68478	2.47248
Cell_0285	AMPKARt2	EAA 1.000000e-01 X + Insulin 10000 ng/ml	0.599706	0.58032	0.525166	0.694853	0.544008	0.58484	0.707048	0.550076	0.660033	0.53013	0.508076	0.667673	0.616679	0.72804	0.411295	0.664822	0.354712	0.57092	0.555243	0.604913	0.527181	0.511199	0.578333	0.661782	0.602895	0.631128	0.643104	0.56192	0.587049	0.519321	0.649894	0.492921	0.642176	0.584723	0.604885	0.736465	0.651604	0.724166	0.639513	0.587194	0.508775	0.375546	0.544035	0.708832	0.596144	0.505114	0.712039
Cell_0286	TFEB_TR	EAA 1.000000e-01 X + Insulin 10000 ng/ml	1.17491	0.980028	1.03592	1.11563	1.46775	0.954286	1.85002	2.25101	1.80518	1.37821	1.09992	1.88152	0.718692	0.579497	2.07509	1.7505	0.923337	0.761282	2.0651	0.609587	0.665541	2.17519	0.695894	0.959534	0.987876	0.675239	1.46214	0.971621	1.38293	0.984507	0.751498	1.32456	1.76438	1.11651	2.07668	2.10982	1.15556	1.17361	1.37426	0.90753	1.44432	0.693646	1.59812	0.666823	1.12853	1.26295	1.80985
Cell_0286	FOXO_TR	EAA 1.000000e-01 X + Insulin 10000 ng/ml	1.45068	2.84806	2.74056	1.65281	3.16398	1.21788	3.11874	2.54062	2.16037	2.50553	1.85925	2.17539	2.86844	1.24735	1.48154	2.31386	1.58359	1.28469	2.91194	1.14285	1.91414	2.60407	1.61808	2.10247	2.64222	1.33624	2.32557	2.96013	1.31045	1.37727	2.32432	1.37756	1.86057	1.20193	1.38985	2.47299	3.25326	2.30071	2.10546	2.67397	1.83511	0.929885	2.89938	1.47379	1.36125	1.80454	2.50296
Cell_0286	AMPKARt2	EAA 1.000000e-01 X + Insulin 10000 ng/ml	0.60939	0.58424	0.529147	0.695798	0.539067	0.583859	0.717259	0.517468	0.656774	0.497554	0.502097	0.666724	0.623693	0.681756	0.424332	0.659025	0.356972	0.570058	0.546686	0.617784	0.519102	0.502227	0.575505	0.654047	0.619	0.63429	0.642419	0.578286	0.559295	0.514933	0.655075	0.494014	0.666553	0.586947	0.596971	0.728802	0.651979	0.723481	0.62352	0.593285	0.511665	0.397683	0.551177	0.709756	0.593095	0.503349	0.706894
Cell_0287	TFEB_TR	EAA 1.000000e-01 X + Insulin 10000 ng/ml	1.30971	0.955798	1.08226	1.44229	1.36506	0.986256	1.89976	2.35488	1.74497	1.28492	0.514117	1.45939	0.755089	0.726861	2.06976	1.68382	0.914389	0.709867	2.24179	0.616225	0.657689	2.14811	0.703131	1.01448	1.06312	0.651654	1.70483	0.989227	1.43208	1.0303	0.739673	1.45008	1.77802	1.11626	2.3225	2.66484	1.25558	1.10758	1.43521	0.900969	1.5121	0.754184	2.043	0.669586	1.20034	1.29532	1.54647
Cell_0287	FOXO_TR	EAA 1.000000e-01 X + Insulin 10000 ng/ml	2.01834	2.74359	2.72065	2.02053	3.01294	1.2237	3.31332	2.7	2.20236	2.58518	1.02481	2.18652	2.97178	1.31047	1.39638	2.34307	1.53797	1.24006	2.90294	1.16995	1.9514	2.56518	1.5494	2.06054	2.55007	1.32091	2.60934	2.96985	1.24973	1.35973	2.32461	1.40207	1.84425	1.20541	1.30746	2.46275	3.26665	2.31584	2.02312	2.63892	1.89306	1.0016	3.01526	1.45126	1.34125	1.76873	2.54492
Cell_0287	AMPKARt2	EAA 1.000000e-01 X + Insulin 10000 ng/ml	0.636045	0.583432	0.51381	0.711198	0.551536	0.584169	0.703971	0.496742	0.663159	0.478047	0.596103	0.669668	0.620846	0.702335	0.408079	0.663937	0.357815	0.585152	0.558307	0.62105	0.526639	0.495732	0.579467	0.666981	0.61521	0.634976	0.634823	0.578197	0.558501	0.507216	0.653858	0.501651	0.658024	0.592559	0.580756	0.728332	0.661191	0.7224	0.631649	0.596917	0.52007	0.439755	0.534885	0.704193	0.576243	0.496389	0.69566
Cell_0288	TFEB_TR	EAA 1.000000e-01 X + Insulin 10000 ng/ml	1.4266	0.9051	1.11754	1.41212	1.29654	0.917704	2.12625	0.597351	1.87254	1.04045	0.516995	1.65873	0.803204	0.740498	2.12742	1.60306	0.910902	0.726966	2.16263	0.617296	0.653605	2.16477	0.712947	1.04572	1.05051	0.65211	1.6586	1.17043	1.52462	1.12797	0.737769	1.32335	1.74164	1.11384	1.70193	2.88518	1.31595	0.929422	1.27623	0.915239	1.42899	0.791794	2.3572	0.698907	1.03498	1.27881	2.15275
Cell_0288	FOXO_TR	EAA 1.000000e-01 X + Insulin 10000 ng/ml	2.46608	2.54295	2.6911	2.17897	3.06913	1.11875	3.31775	2.09837	2.24584	2.50948	1.01881	2.12999	2.96214	1.30887	1.40422	2.34085	1.53802	1.22528	2.89671	1.15585	1.97916	2.53159	1.53796	2.04837	2.42316	1.38239	2.68877	2.95319	1.28035	1.38389	2.37873	1.40953	1.75028	1.15733	1.26216	2.35539	3.27548	2.2778	1.98872	2.73691	1.91511	1.00733	3.15486	1.42396	1.31833	1.72716	2.37679
Cell_0288	AMPKARt2	EAA 1.000000e-01 X + Insulin 10000 ng/ml	0.66065	0.580681	0.501506	0.71422	0.563691	0.5847	0.702468	0.637752	0.661458	0.492395	0.605168	0.664088	0.60257	0.690041	0.418137	0.672627	0.377425	0.60713	0.582633	0.619742	0.539008	0.501051	0.585596	0.678872	0.585074	0.635884	0.643379	0.575744	0.573711	0.517312	0.649577	0.501791	0.641227	0.585292	0.581437	0.733805	0.66291	0.712956	0.643527	0.606615	0.517546	0.430337	0.514599	0.69565	0.57566	0.492089	0.686487
Cell_0289	TFEB_TR	EAA 1.000000e-01 X + Insulin 10000 ng/ml	1.36859	0.892437	1.17357	1.14165	1.04252	0.886933	2.21037	0.635533	1.84635	0.932077	0.515169	2.04661	0.801157	0.681448	2.14154	1.5912	0.906862	0.751512	1.98857	0.600925	0.646667	2.17062	0.726188	1.06087	0.991994	0.670369	1.24102	1.16314	1.53404	1.06757	0.74104	1.26763	1.68202	1.12598	1.33629	2.29059	1.25529	0.979953	1.1341	0.942273	1.40448	0.779034	2.26604	0.714361	0.938951	1.34427	2.59692
Cell_0289	FOXO_TR	EAA 1.000000e-01 X + Insulin 10000 ng/ml	2.51677	2.54019	2.6505	2.12114	1.71413	1.08041	3.46795	2.07233	2.29988	2.47905	1.0136	2.11525	3.00546	1.29364	1.43193	2.27358	1.58166	1.17981	2.8144	1.12383	1.87851	2.50765	1.57606	2.03011	2.41991	1.48608	2.49675	2.87738	1.28958	1.41608	2.42821	1.42375	1.66212	1.1465	1.29461	2.31751	3.26192	2.33196	1.94786	2.8142	1.88684	0.896017	3.02813	1.39425	1.30159	1.83958	2.20787
Cell_0289	AMPKARt2	EAA 1.000000e-01 X + Insulin 10000 ng/ml	0.670844	0.587835	0.513161	0.70302	0.50532	0.582587	0.707875	0.654099	0.659305	0.491757	0.610898	0.652902	0.591723	0.673669	0.442895	0.66159	0.407169	0.603111	0.590193	0.631284	0.537962	0.510821	0.583999	0.663327	0.582312	0.635203	0.665529	0.58886	0.562147	0.53586	0.646631	0.502153	0.652485	0.574365	0.592158	0.723771	0.654538	0.710769	0.63095	0.617065	0.513795	0.440686	0.504057	0.682014	0.587185	0.492523	0.68669
Cell_0290	TFEB_TR	EAA 1.000000e-01 X + Insulin 10000 ng/ml	1.39769	0.877093	1.21002	1.22595	1.05111	0.943461	2.05476	0.618066	1.6973	1.14221	0.513601	1.84118	0.768299	0.713474	2.12529	1.50394	0.909662	0.717019	1.96642	0.589248	0.63768	2.16755	0.718376	1.24345	0.949018	0.689583	1.22193	0.96035	1.48078	0.989214	0.733128	1.27259	1.8301	1.13842	1.89139	2.32604	1.18902	1.10887	1.21569	0.9337	1.65575	0.743255	2.23297	0.757773	0.954424	1.36698	2.31751
Cell_0290	FOXO_TR	EAA 1.000000e-01 X + Insulin 10000 ng/ml	2.56567	2.2213	2.59353	2.03598	1.78687	1.13524	3.5328	2.17423	2.27667	2.49813	0.986893	2.20246	3.02635	1.31328	1.41161	2.15936	1.59785	1.10673	2.78165	1.12753	1.81767	2.50734	1.58456	2.04136	2.42333	1.59714	2.50428	2.78087	1.279	1.43457	2.48115	1.47226	1.76479	1.15992	1.35958	2.25757	3.22046	2.39853	1.84076	2.82825	1.91124	0.911383	2.89841	1.409	1.28725	1.93546	2.29794
Cell_0290	AMPKARt2	EAA 1.000000e-01 X + Insulin 10000 ng/ml	0.665769	0.506814	0.532126	0.705465	0.495789	0.579828	0.702238	0.642479	0.668916	0.470075	0.608412	0.66247	0.602434	0.680605	0.440453	0.648744	0.413951	0.585969	0.582884	0.636184	0.540054	0.507039	0.584854	0.648826	0.603816	0.622626	0.652219	0.600323	0.557228	0.53605	0.647784	0.524013	0.662692	0.572236	0.5951	0.715687	0.649938	0.725124	0.620688	0.615523	0.518438	0.478943	0.501558	0.673507	0.583348	0.510535	0.692665
Cell_0291	TFEB_TR	EAA 1.000000e-01 X + Insulin 10000 ng/ml	1.49198	0.926304	1.21106	1.22536	1.06701	0.970577	1.99219	0.619998	1.75869	1.36635	0.515611	1.66279	0.783986	0.752311	2.16336	1.43168	0.923976	0.705543	1.96479	0.603439	0.644596	2.15485	0.690337	1.21709	0.9182	0.722049	1.48246	1.00596	1.55842	1.04724	0.726369	1.21037	2.02308	1.14596	2.13411	2.81899	1.19284	1.08641	1.21651	0.938687	1.86113	0.71819	2.33058	0.802524	0.953835	1.2977	1.9244
Cell_0291	FOXO_TR	EAA 1.000000e-01 X + Insulin 10000 ng/ml	2.62217	2.26373	2.53633	2.03046	1.8485	1.15973	3.38571	2.27272	2.22546	2.44294	0.9618	2.29437	2.91491	1.34766	1.37908	2.11899	1.60037	1.07715	2.83162	1.13993	1.9	2.4896	1.56111	2.0301	2.32844	1.72458	2.77403	2.78379	1.2932	1.43697	2.50319	1.49997	1.82616	1.18246	1.38114	2.18562	3.15261	2.4047	1.82919	2.88085	1.99968	0.9981	3.07502	1.42253	1.24353	2.00996	2.37031
Cell_0291	AMPKARt2	EAA 1.000000e-01 X + Insulin 10000 ng/ml	0.652612	0.499952	0.52763	0.716454	0.512766	0.57783	0.700143	0.644885	0.672053	0.477053	0.612411	0.669327	0.620839	0.687413	0.437311	0.653583	0.413442	0.58157	0.576732	0.629263	0.541786	0.499103	0.589926	0.653954	0.598789	0.613654	0.624554	0.599657	0.576754	0.539872	0.653263	0.529335	0.643949	0.566139	0.592084	0.726691	0.65178	0.735653	0.633991	0.616978	0.516758	0.473889	0.509	0.679817	0.585651	0.523808	0.688709
Cell_0292	TFEB_TR	EAA 1.000000e-01 X + Insulin 10000 ng/ml	1.41076	0.913181	1.22516	0.992814	1.06938	0.976923	2.03963	0.665698	1.83482	1.27739	0.517204	1.72822	0.822989	0.666835	2.16159	1.48417	0.929575	0.720301	2.06634	0.609129	0.65183	2.08893	0.675505	0.962043	0.952062	0.708937	1.63549	1.26746	1.68072	1.06676	0.737113	1.33944	1.98383	1.15814	2.00373	2.10473	1.26479	1.09651	1.12308	0.962658	1.8871	0.72732	2.30975	0.812018	1.00033	1.35602	1.90814
Cell_0292	FOXO_TR	EAA 1.000000e-01 X + Insulin 10000 ng/ml	2.46711	2.10377	2.4988	2.03419	1.84818	1.16377	3.22043	2.28841	2.25541	2.39428	0.959853	2.30357	2.83681	1.38153	1.35361	2.20665	1.63302	1.07787	2.84187	1.13086	1.9466	2.43116	1.55588	1.93901	2.28397	1.76863	2.9866	2.82877	1.30023	1.41121	2.47895	1.46716	1.70005	1.23974	1.38722	2.21856	3.15369	2.47427	1.88774	2.88891	2.13991	0.895433	3.19871	1.40417	1.29629	2.20514	2.2582
Cell_0292	AMPKARt2	EAA 1.000000e-01 X + Insulin 10000 ng/ml	0.644297	0.514278	0.505527	0.711135	0.532863	0.575055	0.708934	0.656139	0.665025	0.50542	0.617612	0.64894	0.624854	0.682268	0.444755	0.659415	0.440454	0.583676	0.58283	0.627936	0.51314	0.501381	0.589673	0.661269	0.590387	0.621698	0.636476	0.595091	0.578128	0.560576	0.650965	0.489161	0.623943	0.55503	0.589944	0.734647	0.651725	0.727498	0.651056	0.62883	0.508824	0.450077	0.517932	0.694191	0.606908	0.521105	0.674993
Cell_0293	TFEB_TR	EAA 1.000000e-01 X + Insulin 10000 ng/ml	1.29183	0.903593	1.22882	1.02921	1.06136	1.01412	1.99662	0.690783	1.71913	1.21785	0.513238	1.56217	0.824405	0.676826	2.08516	1.56419	0.926037	0.689645	2.15227	0.599991	0.657797	2.01877	0.682751	0.965599	1.06967	0.642662	1.7182	1.28702	1.66546	0.962949	0.751565	1.57016	1.85255	1.17402	1.9926	1.50986	1.35644	1.30992	1.11683	0.957254	2.08908	0.746607	2.41136	0.852259	1.02606	1.5342	2.37192
[truncated: 116 more rows]
[truncated: 57 more columns]

## Sheet: condition 02
Treatment Spike															Insulin 10000 ng/ml																									EAA 1.000000e-01 X
[truncated: 1,081 more rows]
[truncated: 57 more columns]

## Sheet: condition 03
Treatment Spike															EAA 1.000000e-01 X																									Vehicle
[truncated: 775 more rows]
[truncated: 57 more columns]

## Sheet: condition 04
Treatment Spike															Insulin 10000 ng/ml																									Vehicle
[truncated: 1,048 more rows]
[truncated: 57 more columns]
