# Supplementary material for: Continuous sensing of nutrients and growth factors by the mTORC1-TFEB axis
Source: eLife. 2023 Sep 12;12:e74903. doi: 10.7554/eLife.74903 (PMC10547473; doi:10.7554/eLife.74903)
Supplement: Figure 4—source data 6. [file elife-74903-fig4-data6.xlsx]

## Sheet: WTMEFs_GG_TFEBKTR
WTMEFs_NLSmceruleanTFEBTR; cells cultured with 17mM Gluc at -5h, 2.5mM Glut at -5h, stimulated at time point(s) 15, 33, 55; sampling time: 6 min; data are cells-by-time
Treatments: 0.1% Vehicle, then 10ug/mL Ins, then 0.1x EAA
Replicate 1
1.13516	0.995827	1.0807	1.14256	1.08143	1.06219	1.0263	0.978315	0.969935	0.920857	0.927408	0.895611	0.877431	0.880725	0.858337	0.889974	0.871813	0.834775	0.799837	0.802485	0.792301	0.846714	0.864256	0.862479	0.844617	0.882215	0.91087	0.89158	0.887875	0.88596	0.850012	0.92829	0.939175	0.89225	0.879636	0.893627	0.906767	0.899374	0.852836	0.914511	0.915086	0.926806	0.933629	0.908668	0.890432	0.910177	1.00704	0.985904	0.974467	1.0163
1.465	1.36718	1.37204	1.28603	1.19021	1.127	1.31728	1.26577	1.26981	1.2499	1.15253	1.16653	1.08439	1.06125	1.17556	1.06951	1.09765	1.0582	1.17009	1.24783	1.36292	1.29698	1.346	1.14149	1.18316	1.17698	1.14822	1.07183	1.14422	1.16239	1.18979	1.24125	1.28437	1.24833	1.10897	1.28574	1.38184	1.25722	1.08998	1.14819	1.17534	1.20974	1.07436	1.137	1.06293	0.985606	1.05961	1.23055	1.05376	1.00438
0.592692	0.654885	0.622105	0.610788	0.598667	0.550927	0.589817	0.639406	0.605736	0.58992	0.617711	0.644059	0.602989	0.581321	0.659607	0.667481	0.641445	0.626297	0.631157	0.61963	0.58188	0.620205	0.646625	0.686703	0.691309	0.676947	0.665502	0.718551	0.720749	0.723114	0.709841	0.667079	0.657695	0.728756	0.746914	0.742587	0.656691	0.610514	0.633448	0.703659	0.714953	0.746252	0.735589	0.692447	0.683322	0.735951	0.706882	0.779591	0.765146	0.789264
2.36005	2.13278	2.13634	2.43016	2.47845	2.54349	2.77274	2.40999	2.45729	2.26086	2.26237	2.15668	2.16626	2.22323	1.95568	2.076	2.04389	2.21049	2.09395	2.02947	2.2378	1.91902	1.94793	2.00346	2.06866	1.96211	1.93955	1.78469	1.96116	1.9061	1.87346	1.94663	1.82593	1.73806	1.85275	1.85129	1.85393	2.00517	1.94481	2.05902	1.98204	1.99648	1.93265	2.02103	1.87483	1.93871	1.91535	1.89988	1.69242	1.876
0.557359	0.593198	0.621983	0.641708	0.661814	0.656297	0.651371	0.688231	0.672723	0.628805	0.651069	0.649804	0.632907	0.621025	0.631921	0.642845	0.623547	0.594759	0.609363	0.578612	0.602204	0.624923	0.649893	0.635228	0.611212	0.610333	0.622398	0.617481	0.61468	0.643852	0.664479	0.611599	0.68653	0.697083	0.643749	0.660517	0.670155	0.633614	0.661577	0.637984	0.620064	0.619598	0.642142	0.656746	0.656881	0.696231	0.708899	0.750333	0.747012	0.710877
2.28396	1.96932	1.93109	1.89839	1.77814	1.81706	1.89252	1.65827	1.64185	1.64383	1.56852	1.47278	1.52172	1.3934	1.39104	1.37879	1.40794	1.43938	1.26019	1.31209	1.25827	1.26513	1.23877	1.23162	1.24092	1.27471	1.25225	1.21349	1.21614	1.18577	1.11712	1.07224	1.06856	1.05777	1.06723	1.01642	1.08392	1.109	1.07253	1.06467	1.06254	1.05201	1.14545	1.06752	0.981436	1.02062	1.04313	1.03444	1.10419	1.03852
1.83571	1.68057	1.88286	1.73991	1.65515	1.72237	1.7224	1.43349	1.49609	1.46428	1.48323	1.46468	1.50177	1.51402	1.51992	1.48413	1.4479	1.70934	1.56394	1.48297	1.63329	1.57064	1.57581	1.48244	1.50723	1.64622	1.63692	1.63822	1.61899	1.72313	1.48732	1.55534	1.51445	1.48398	1.34981	1.42344	1.36997	1.33969	1.31153	1.33975	1.30886	1.169	1.22063	1.19115	1.09787	1.10935	1.19399	1.04842	1.05789	1.1561
1.57011	1.58489	1.5493	1.47875	1.49895	1.38762	1.34595	1.36268	1.2181	1.21589	1.18493	1.09771	1.10269	1.13244	1.14442	1.13043	1.10814	1.18436	1.13659	1.10167	1.09448	1.1053	1.02063	1.02692	1.042	0.98236	0.971103	1.02842	1.03936	1.05025	0.985709	0.961108	0.979438	1.00081	0.993578	1.04728	1.09117	1.04874	1.1102	1.05769	1.09209	1.10872	1.09031	1.06977	0.98	1.02489	1.04463	1.04645	1.01424	1.02036
1.49223	1.44216	1.38341	1.42007	1.31438	1.30535	1.34405	1.22518	1.3127	1.15572	1.13746	1.12079	1.09766	1.0989	1.04881	1.06823	0.939979	0.99249	0.95772	0.898695	0.937034	0.912624	0.930464	0.92674	0.898449	0.900999	1.02198	0.968405	0.975239	0.98292	1.00135	0.952902	1.01223	1.00555	1.02619	1.04	1.02333	1.05074	1.16842	1.12949	1.12292	1.1661	1.14418	1.1574	1.136	1.17738	1.26639	1.22114	1.23267	1.30005
1.70019	1.61348	1.86576	1.48231	1.75766	1.65359	1.82475	1.66959	1.65467	1.70846	1.52057	1.70532	1.62424	1.74427	1.79228	1.68586	1.83792	2.09829	2.05481	2.10072	2.02277	1.93966	1.80001	1.7721	1.83265	1.74838	1.79129	1.67782	1.84806	1.84677	1.88854	1.70073	1.45095	1.38839	1.40283	1.38221	1.52096	1.47017	1.27963	1.33359	1.3217	1.29383	1.24415	1.17397	1.32794	1.3958	1.25476	1.23477	1.34272	1.24907
0.762782	0.76137	0.74761	0.7681	0.734892	0.727133	0.739487	0.753939	0.704715	0.691074	0.711789	0.695679	0.685031	0.705034	0.698263	0.700157	0.687054	0.669094	0.670927	0.661631	0.645762	0.627205	0.625832	0.549225	0.596152	0.603875	0.637308	0.672118	0.55687	0.652768	0.581315	0.730413	0.808268	0.203515	0.144994	0.135654	0.112751	0.130092	0.214348	0.24096	0.322275	0.279602	0.254865	0.212655	0.366867	0.55823	0.607199	0.625532	0.650539	0.647758
1.45372	1.59639	1.70662	1.68182	1.77936	1.76716	2.01808	1.8555	1.8689	1.85969	1.87217	1.85663	1.81834	1.88725	1.81288	1.73702	1.78371	1.89497	1.82805	1.7516	1.6858	1.66321	1.71056	1.55943	1.7139	1.53528	1.59444	1.64654	1.57562	1.72505	1.67048	1.57571	1.43708	1.45619	1.41668	1.3335	1.27143	1.39081	1.20733	1.25429	1.14866	1.09888	1.2711	1.20812	1.16693	1.15629	1.22059	1.16335	1.0916	1.13787
1.47924	1.34243	1.34817	1.21637	1.28978	1.27563	1.30069	1.1915	1.29329	1.21043	1.23856	1.26088	1.17814	1.24013	1.18543	1.30205	1.28725	1.25476	1.16381	1.06741	1.02847	1.07985	1.03954	1.16165	1.12166	1.13062	1.11243	1.10886	1.08028	1.10315	1.07038	1.04909	1.09913	1.01391	0.991042	1.04476	1.07008	1.0632	1.07035	1.19759	1.25521	1.31448	1.3469	1.35943	1.2853	1.36178	1.23711	1.27753	1.18953	1.23325
0.945027	0.866532	0.871439	0.886188	0.844968	0.859573	0.844266	0.879577	0.898422	0.954282	0.939601	0.931853	1.01542	1.04384	1.02006	0.947057	0.833863	0.815215	0.682364	0.697641	0.760281	0.735845	0.747758	0.742276	0.77014	0.759089	0.718446	0.813066	0.789242	0.740763	0.73909	0.784836	0.773835	0.782252	0.751184	0.758093	0.755601	0.738375	0.683923	0.710964	0.708236	0.710044	0.705275	0.711737	0.714302	0.7142	0.709873	0.663696	0.640374	0.633005
0.759227	0.705621	0.654832	0.695856	0.67586	0.679453	0.644997	0.638669	0.640719	0.629243	0.612121	0.674117	0.624204	0.633981	0.674934	0.648863	0.600407	0.603485	0.6064	0.629523	0.614267	0.610036	0.57437	0.59935	0.592211	0.594187	0.592198	0.594276	0.577707	0.573125	0.569153	0.555047	0.582277	0.583589	0.599021	0.603974	0.566014	0.582008	0.581867	0.585117	0.555089	0.528388	0.52645	0.528877	0.520743	0.545691	0.537846	0.538549	0.537146	0.53536
0.680267	0.653665	0.678847	0.702404	0.707774	0.735566	0.707572	0.720479	0.726202	0.703119	0.737003	0.726279	0.717637	0.711899	0.767999	0.761442	0.701992	0.729934	0.719091	0.746738	0.73831	0.801469	0.805876	0.767817	0.786995	0.785082	0.762828	0.737543	0.738548	0.747898	0.733627	0.750257	0.760043	0.803988	0.791643	0.849084	0.859646	0.85226	0.877532	0.871419	0.878931	0.844994	0.875862	0.899698	0.934291	0.900505	0.92263	0.93551	0.916559	0.886411
0.695954	0.729567	0.7163	0.792946	0.754647	0.767083	0.749287	0.82558	0.765153	0.807029	0.775494	0.808215	0.813507	0.786655	0.764218	0.731739	0.708346	0.743933	0.703051	0.666672	0.663807	0.659687	0.661062	0.659733	0.693145	0.677787	0.659558	0.673695	0.652669	0.648391	0.62813	0.590086	0.587944	0.642419	0.619337	0.600246	0.600398	0.540907	0.567753	0.556834	0.533455	0.554477	0.515151	0.546962	0.559304	0.555468	0.551471	0.564114	0.590965	0.567307
1.03907	1.00028	0.996168	0.964274	1.0778	1.08528	1.12331	1.06909	1.09192	1.08723	1.08603	1.07621	1.04263	1.07245	1.15375	1.14503	1.17434	1.10597	1.07779	1.10448	1.10167	1.14393	1.05719	1.06276	1.18581	1.09894	1.20384	1.24385	1.2553	1.27309	1.32721	1.20941	1.25708	1.28966	1.15234	1.08906	1.26741	1.37831	1.04216	1.26621	1.22481	1.35961	1.35673	1.29819	1.3627	1.32501	1.29612	1.50972	1.56103	1.66251
0.971452	0.965114	1.04463	0.993968	0.910442	0.902768	0.904615	0.920432	0.955025	1.01244	0.965565	0.957282	1.01092	1.02956	1.02664	1.01349	0.99149	1.07634	1.00594	1.00395	0.89622	0.940675	0.890087	0.932079	0.992694	0.921065	0.889124	0.898216	0.9196	0.95891	0.937765	0.975377	0.981271	1.02118	1.02592	1.14121	1.02029	1.17564	1.04286	0.94223	0.889965	0.899753	0.936814	0.892931	0.895475	0.894745	0.914368	0.871649	0.861878	0.866488
1.13516	1.13155	1.08708	1.04483	1.09812	1.1623	1.21866	1.2497	1.32046	1.28076	1.33383	1.21549	1.11637	1.26711	1.16948	1.20258	1.26461	1.32384	1.42876	1.50542	1.411	1.39592	1.38158	1.27146	1.17334	1.21212	1.20693	1.07706	1.18249	1.06912	1.00504	0.903836	0.921436	0.972791	1.04788	0.989127	0.999494	1.033	1.02421	1.02906	1.10911	1.08238	1.17004	1.20301	1.20573	1.33144	1.2816	1.24154	1.29069	1.26058
1.11422	1.13983	1.26594	1.31093	1.26487	1.29725	1.31252	1.25837	1.28279	1.3094	1.26643	1.29954	1.33735	1.34384	1.41394	1.36237	1.34459	1.2328	1.25303	1.28133	1.2421	1.20036	1.25351	1.24773	1.25218	1.31695	1.43397	1.44775	1.51969	1.46668	1.40836	1.55579	1.31287	1.45169	1.25756	1.15401	1.25276	1.36519	1.4436	1.23263	1.28747	1.39773	1.27285	0.983786	1.19817	1.23396	1.09459	1.00253	0.864524	0.891689
0.897314	0.870743	0.867518	0.949933	0.973743	0.993967	0.955479	0.964198	0.954051	0.904833	0.914219	0.94999	0.954555	0.957154	0.951685	0.974896	0.958056	0.918624	0.908586	0.87364	0.907873	0.885439	0.874915	0.848126	0.845949	0.860085	0.859958	0.885451	0.951051	0.946484	0.898387	0.87987	0.869576	0.924005	0.937029	0.932352	0.888649	0.880543	0.881118	0.915208	0.921971	0.970708	0.946876	0.946876	1.00324	1.05052	1.12109	1.10127	1.05147	1.07707
0.953781	0.973037	0.92956	0.965758	0.958611	0.947004	0.90611	0.86707	0.84784	0.856496	0.873866	0.852197	0.837444	0.881309	0.961768	0.853874	0.832061	0.887541	0.903115	0.88654	0.918579	0.916148	0.901496	0.890912	0.874178	0.873669	0.861307	0.887677	0.917273	0.896436	0.91367	0.951191	0.894136	0.953403	0.987879	1.03569	0.95571	0.930161	0.947997	0.967889	0.96234	1.01088	0.98895	1.06124	1.0636	1.05664	1.05223	1.06324	1.07909	1.20217
1.03271	0.969451	1.05643	1.05198	1.12886	1.05449	1.07575	1.0076	1.06174	1.10579	1.0014	1.08878	0.864038	0.996173	1.0057	0.957714	0.978655	1.06673	1.09814	1.08433	0.996448	1.01138	1.02703	1.02456	1.01249	1.10861	1.06066	1.14993	1.00595	1.01519	1.04098	1.03724	1.00777	1.11988	1.0518	1.13362	1.14873	1.2678	1.32036	1.27197	1.15697	1.21741	1.26089	1.33027	1.24813	1.30815	1.39689	1.34332	1.34571	1.37188
0.71997	0.701504	0.723557	0.73538	0.723766	0.727717	0.703153	0.748013	0.694304	0.707059	0.717427	0.703965	0.731674	0.777302	0.722481	0.742519	0.705072	0.740843	0.726138	0.763809	0.775244	0.786617	0.796007	0.797594	0.784963	0.856581	0.845832	0.796676	0.827923	0.80324	0.8062	0.806013	0.837254	0.902582	0.909318	0.899721	0.912944	0.967018	1.00756	1.01572	1.05655	1.1512	1.09521	1.10503	1.14226	1.14887	1.13867	1.17711	1.1765	1.23092
0.822375	0.776903	0.772157	0.778579	0.757455	0.749181	0.732145	0.735717	0.748892	0.727712	0.750301	0.757872	0.777184	0.733349	0.623557	0.681582	0.638738	0.592504	0.601375	0.57787	0.555236	0.623633	0.623331	0.612672	0.589936	0.559977	0.602392	0.555965	0.599038	0.593126	0.596709	0.594309	0.531097	0.590994	0.677872	1.119	0.595649	0.174132	0.153886	0.132871	0.481465	0.196315	0.840011	1.1792	0.821525	0.948816	0.837948	0.952658	1.0105	1.00849
1.80122	1.74212	1.73159	1.73946	1.74899	1.74122	1.74272	1.64029	1.64537	1.61187	1.54273	1.5161	1.5419	1.55566	1.56981	1.54244	1.55457	1.45358	1.38035	1.37806	1.29917	1.24153	1.23039	1.24051	1.18813	1.22789	1.32949	1.33947	1.27322	1.32543	1.3318	1.31732	1.38114	1.4058	1.37579	1.31432	1.38015	1.40246	1.46695	1.38388	1.32454	1.36273	1.39542	1.34588	1.43558	1.41815	1.44511	1.39188	1.45259	1.54534
2.09829	1.87632	1.93102	1.99479	1.81692	1.87047	1.83781	1.87022	1.92157	1.70033	1.60737	1.65294	1.70194	1.67125	1.60826	1.51703	1.48088	1.45085	1.30379	1.26277	1.23129	1.25634	1.26779	1.25133	1.25553	1.21316	1.23365	1.1845	1.18324	1.12795	1.10273	1.1175	1.109	1.15328	1.11079	1.11406	1.06142	1.06649	1.01914	1.06808	1.10104	1.12545	1.13687	1.19459	1.24688	1.23159	1.24477	1.22505	1.18893	1.20378
1.08996	1.07658	1.03942	0.987919	1.02154	1.05782	1.15254	1.10208	1.22522	1.18006	1.22458	1.24004	1.29954	1.31567	1.34039	1.43135	1.35756	1.33108	1.26534	1.23	1.2737	1.29988	1.27109	1.2276	1.18647	1.20194	1.25832	1.34491	1.39072	1.26857	1.29141	1.32554	1.30388	1.38487	1.34944	1.43522	1.41776	1.52566	1.5047	1.42649	1.45557	1.47953	1.49619	1.46779	1.62577	1.61894	1.71461	1.60997	1.64084	1.61459
0.997814	1.0135	1.02096	1.01556	1.13758	1.21486	1.12614	1.11862	1.086	1.07094	0.944839	0.944045	0.883314	0.928388	0.945198	0.907778	0.914887	0.964831	0.922734	0.922886	0.876145	0.87496	0.84485	0.837227	0.815647	0.875182	0.826844	0.838463	0.82812	0.819451	0.883571	0.802795	0.804184	0.79088	0.818892	0.801395	0.810895	0.841641	0.804481	0.864372	0.89695	0.891366	0.893335	0.972074	1.12653	0.454911	0.211362	0.200304	0.228205	0.42981
1.08555	1.11433	1.04741	1.08697	1.06342	1.04588	1.07027	1.14312	1.09772	1.105	1.00224	0.974338	0.936742	0.959751	1.00707	1.04218	1.08742	1.08816	1.17496	1.13911	1.16301	1.13336	1.13614	1.12303	1.16246	1.19551	1.17998	1.14565	1.18405	1.13948	1.2117	1.20993	1.23258	1.36291	1.35735	1.37021	1.43292	1.4073	1.55248	1.60116	1.66324	1.71097	1.68775	1.74241	1.6779	1.84526	1.77139	1.67791	1.66878	1.63982
1.56027	1.51823	1.54096	1.52724	1.58162	1.68708	1.70103	1.65223	1.73319	1.66415	1.67029	1.66976	1.70289	1.63149	1.64581	1.67699	1.56966	1.3018	1.37921	1.50683	1.43614	1.55603	1.63241	1.5219	1.44775	1.51967	1.5926	1.60379	1.49916	1.57352	1.47301	1.48414	1.51745	1.59368	1.55043	1.47179	1.46525	1.43368	1.47759	1.49483	1.51411	1.45448	1.42839	1.40397	1.4464	1.54103	1.64307	1.5709	1.34463	1.35463
1.18997	1.09358	1.20393	1.10955	1.18596	1.2116	1.20939	1.19265	1.29376	1.26798	1.14292	1.13483	1.07407	1.09043	1.07305	1.06777	1.1094	1.18568	1.11003	1.20153	1.13376	1.12015	1.0937	1.10864	0.997298	0.985784	0.986628	1.01185	1.01074	1.02859	0.991692	0.997459	1.01825	1.09644	1.09138	1.13163	1.12109	1.14967	1.10735	1.10656	1.11412	1.12003	1.09478	1.19425	1.19841	1.21924	1.24484	1.2252	1.18328	1.20368
0.702126	0.695436	0.693274	0.73518	0.757233	0.73982	0.740971	0.710089	0.707227	0.775714	0.798529	0.760309	0.763843	0.778489	0.750366	0.700331	0.702092	0.687425	0.712287	0.707538	0.700308	0.738221	0.780466	0.776762	0.786434	0.797222	0.751569	0.780965	0.745129	0.706253	0.757879	0.79555	0.838581	0.900954	0.834413	0.865781	0.901256	0.901433	0.998572	1.00792	1.05833	1.07162	1.14829	1.18179	1.18001	1.18293	1.26568	1.25434	1.23396	1.32847
1.2667	1.21628	1.2822	1.25316	1.19413	1.17518	1.15326	1.15452	1.1194	1.08444	1.12768	1.08542	1.08341	1.10185	1.1146	1.10761	1.11324	1.09299	1.09869	1.07807	1.0311	1.05029	1.02895	0.974944	1.04417	1.02746	1.00467	0.991684	1.02077	1.04575	0.973675	0.972944	0.96944	0.957657	0.938349	0.936485	0.947143	0.919535	0.956795	0.91097	0.926173	0.898852	0.932846	0.920888	0.886044	0.880796	0.907775	0.89192	0.958229	0.940251
1.439	1.34982	1.34838	1.29585	1.3335	1.28785	1.27509	1.17755	1.2908	1.14961	1.10339	1.18378	1.14452	1.08158	0.928237	0.894573	0.834112	0.778957	0.869154	0.829214	0.878874	0.865346	0.805812	0.82442	0.719752	0.620263	0.523614	0.474059	0.524596	0.476873	0.536298	0.563048	0.681677	0.69532	0.646573	0.666313	0.724877	0.635247	0.641803	0.701937	0.734188	0.755204	0.765097	0.753282	0.743631	0.70965	0.69867	0.737766	0.728967	0.726063
0.793004	0.767429	0.730801	0.694527	0.707605	0.706079	0.718462	0.722359	0.667861	0.69865	0.724807	0.710227	0.747655	0.740447	0.741056	0.706458	0.702603	0.759746	0.738239	0.678658	0.700182	0.698897	0.718077	0.750735	0.738858	0.736276	0.691324	0.682374	0.688369	0.708592	0.75818	0.704805	0.713733	0.756084	0.697792	0.714742	0.651975	0.674873	0.79478	0.720708	0.741995	0.762694	0.795681	0.790097	0.783383	0.810556	0.726105	0.754241	0.796341	0.775893
1.61632	1.5191	1.56098	1.57525	1.57136	1.48543	1.68472	1.69014	1.64847	1.57381	1.60536	1.67695	1.58657	1.57582	1.61155	1.52375	1.47388	1.65505	1.75376	1.66796	1.68925	1.55992	1.53802	1.64781	1.62233	1.64886	1.58201	1.48612	1.58977	1.55759	1.47138	1.46695	1.44146	1.30416	1.25283	1.35888	1.19098	1.19139	1.14347	1.11245	1.09304	1.08821	1.01816	1.0158	1.00894	1.00411	0.93811	0.916561	0.887116	0.945174
1.01565	0.927986	0.961611	1.02765	0.987438	0.95217	0.903765	0.939685	0.891469	0.892207	0.931777	0.948596	0.926147	0.966632	0.978663	0.950666	0.864712	0.895342	0.853415	0.816933	0.844324	0.825054	0.810882	0.781046	0.772833	0.79951	0.802503	0.777958	0.790785	0.799475	0.769383	0.82026	0.822479	0.793535	0.838718	0.789809	0.779839	0.79719	0.81017	0.820682	0.785269	0.797466	0.80707	0.821534	0.825591	0.78892	0.762293	0.786019	0.753202	0.724367
2.13647	1.75261	1.81394	1.87687	1.67924	1.49637	1.65954	1.81766	1.59403	1.40239	1.64213	1.34139	2.7544	1.51134	1.37993	1.3083	1.36919	1.45808	1.42937	1.35179	1.48309	1.39623	1.43675	1.39801	1.31564	1.30127	1.39265	1.31024	1.38526	1.36858	1.39001	1.65892	1.61792	1.31973	1.36504	1.44661	1.22386	1.5018	1.61476	1.60001	1.88515	1.68808	1.96869	1.74352	1.73347	1.90909	2.1999	1.88447	2.02823	1.87582
0.669865	0.677023	0.66491	0.610638	0.57275	0.588472	0.552612	0.560834	0.533016	0.557665	0.594592	0.612572	0.632113	0.621508	0.643344	0.666947	0.647613	0.693886	0.688919	0.662989	0.636102	0.573258	0.594177	0.628809	0.627001	0.587638	0.617353	0.621984	0.622318	0.603664	0.654399	0.633228	0.642116	0.661364	0.690223	0.661665	0.683562	0.660983	0.634112	0.700699	0.680994	0.685364	0.72126	0.725219	0.716104	0.740251	0.749876	0.721283	0.708179	0.737332
0.6926	0.748426	0.736555	0.761486	0.759813	0.759707	0.777319	0.760124	0.759156	0.748283	0.74573	0.767786	0.752174	0.756938	0.687758	0.711844	0.744961	0.732587	0.704064	0.674762	0.661962	0.670724	0.677965	0.658567	0.670747	0.636966	0.671804	0.664288	0.666328	0.67718	0.658824	0.691869	0.723992	0.71614	0.747042	0.788311	0.782243	0.78493	0.75233	0.763029	0.758179	0.784836	0.789256	0.733546	0.757073	0.726426	0.726127	0.754633	0.781468	0.770445
1.35021	1.20599	1.32597	1.22597	1.1921	1.22879	1.22712	1.23036	1.28278	1.22528	1.18992	1.25403	1.25695	1.2203	1.14489	1.22063	1.19507	1.22775	1.21446	1.25645	1.26845	1.22928	1.20458	1.11583	1.13863	1.09834	1.12344	1.16899	1.14593	1.11485	1.05193	1.07151	1.07756	1.04103	1.00794	1.08488	1.04869	1.09191	1.17882	1.1236	1.09575	1.12052	1.14158	1.14167	1.07372	1.21393	1.21863	1.2161	1.22898	1.27554
0.734802	0.760442	0.768894	0.788427	0.772952	0.851583	0.810395	0.802014	0.76658	0.761825	0.759483	0.763452	0.714848	0.755807	0.734869	0.735364	0.696037	0.717546	0.666643	0.685041	0.722476	0.722136	0.677848	0.68349	0.718462	0.721239	0.696581	0.715898	0.716659	0.735493	0.732182	0.697538	0.746891	0.707698	0.724689	0.72436	0.749047	0.73026	0.810378	0.75448	0.818652	0.836528	0.87069	0.868014	0.872956	0.8931	0.853775	0.836297	0.850348	0.856213
1.73604	1.61217	1.61655	2.13501	2.18101	2.19104	1.92045	1.98679	1.82719	1.63826	1.59049	1.50417	1.36428	1.40964	1.42118	1.409	1.60614	1.48005	1.49541	1.52849	1.47451	1.39376	1.41785	1.39991	1.5074	1.36707	1.42536	1.67748	1.62015	1.5871	1.46136	1.4882	1.46642	1.27283	1.30035	1.47089	1.43416	1.51601	1.66065	1.48621	1.55063	1.52843	1.4963	1.59211	1.56189	1.56237	1.53954	1.59052	1.378	1.59787
0.984947	1.06123	1.11734	1.02302	1.04938	0.95725	0.94875	0.869252	0.910085	0.849886	0.881917	0.865479	0.908545	0.927765	0.872423	0.88317	0.831571	0.868055	0.852636	0.853375	0.860422	0.86184	0.888523	0.887468	0.863926	0.888255	0.933754	0.810884	0.876347	0.795249	0.811361	0.804364	0.873861	0.865064	0.829032	0.900294	0.862222	0.899931	0.907907	0.889657	0.837429	0.89232	0.845385	0.827103	0.900248	0.834447	0.953789	0.967486	0.904608	0.929788
0.894385	0.895662	0.797902	0.772958	0.652218	0.666841	0.710944	0.709502	0.673003	0.668358	0.6257	0.629171	0.630293	0.625702	0.624027	0.611466	0.691697	0.655497	0.668307	0.61862	0.589139	0.592409	0.577067	0.556045	0.544391	0.499666	0.533868	0.529179	0.541952	0.525958	0.573426	0.552528	0.603476	0.615789	0.609791	0.579475	0.599867	0.609704	0.604652	0.556801	0.553289	0.574596	0.576241	0.586816	0.558969	0.553425	0.565269	0.545854	0.562624	0.537411
1.29412	1.24945	1.19959	1.18419	1.13286	1.0804	1.1519	1.10271	1.11371	1.05524	0.959345	0.975276	0.918469	0.942358	0.955866	0.899386	0.89103	0.935625	0.963666	1.03638	0.983846	1.05321	1.06836	1.02046	1.08185	1.0415	1.12186	1.04035	1.05163	1.08314	1.02536	1.05826	1.03669	1.03164	1.03009	1.0306	1.04785	1.08789	1.06789	1.09621	1.11392	1.04085	1.1341	1.13532	1.10074	1.06781	1.16958	1.12906	1.14887	1.15389
1.33404	1.2865	1.32814	1.29777	1.22928	1.1713	1.18241	1.0619	1.11348	1.06527	1.03506	1.04462	1.03333	1.0412	0.99668	1.00661	1.00998	1.0318	0.998695	1.04787	0.994036	1.0046	0.981486	0.955616	0.974075	0.930499	0.939746	0.872121	0.854193	0.846803	0.87156	0.843962	0.83349	0.853769	0.837579	0.810693	0.817087	0.861249	0.8089	0.804327	0.827682	0.787725	0.828962	0.815685	0.811363	0.829512	0.842466	0.791364	0.800328	0.840067
0.719532	0.65752	0.660315	0.737809	0.774634	0.757697	0.693259	0.690893	0.734619	0.733226	0.709492	0.641095	0.675066	0.670728	0.649512	0.722246	0.746401	0.706915	0.729242	0.804266	0.798144	0.801664	0.831963	0.811646	0.84495	0.816763	0.838591	0.841364	0.84459	0.851571	0.885627	0.903859	0.902309	0.94607	0.910601	0.910127	0.923683	0.954848	0.945631	0.981087	1.00757	1.01694	1.02922	0.983586	1.02108	1.04359	1.03112	1.02988	1.0566	1.00419
0.742801	0.744634	0.740461	0.695153	0.742262	0.727671	0.751205	0.76802	0.760653	0.749092	0.764583	0.741189	0.754697	0.754669	0.817106	0.825198	0.821795	0.827181	0.803351	0.803163	0.802547	0.833008	0.872652	0.846013	0.841616	0.805426	0.765255	0.766084	0.755961	0.692247	0.7333	0.724634	0.777708	0.782671	0.763631	0.781618	0.77674	0.775458	0.759751	0.74499	0.702707	0.751179	0.78162	0.80856	0.775418	0.804422	0.776218	0.752432	0.737842	0.709748
0.660409	0.703864	0.767493	0.682025	0.630597	0.635597	0.657135	0.618756	0.572573	0.558928	0.574724	0.554817	0.53357	0.559306	0.565225	0.530997	0.48781	0.469447	0.508571	0.483379	0.499787	0.502922	0.527783	0.459476	0.505049	0.474968	0.460466	0.418357	0.42246	0.455071	0.434702	0.385392	0.415491	0.421223	0.451826	0.422293	0.453136	0.491324	0.511792	0.500683	0.490645	0.482013	0.502029	0.54744	0.542289	0.522132	0.520399	0.534475	0.572351	0.551561
0.658495	0.681479	0.878259	0.963284	0.925076	1.00125	1.06169	1.08409	1.03534	1.07173	1.00519	1.07343	1.12095	1.11158	1.08096	1.07282	1.06383	1.09725	1.014	1.01446	1.01927	1.06073	1.09948	1.07501	1.04343	1.03349	0.990252	1.00819	0.987764	1.03	1.05684	1.13956	1.08709	1.14843	1.16749	1.07283	1.05405	1.08224	1.10608	1.09827	1.09731	1.0973	1.07224	1.11465	1.14082	1.24156	1.29812	1.22943	1.19498	1.38113
0.823545	0.787069	0.873548	0.892796	0.784551	0.822498	0.829635	0.80031	0.715428	0.866084	0.873349	1.02031	0.913852	0.918269	1.01461	1.0176	1.033	0.859551	0.705357	0.779281	0.825239	0.850244	0.848829	0.84312	0.889866	0.791139	0.833799	0.895725	0.888412	0.956531	0.993785	0.928309	0.963693	1.06256	1.03898	1.08086	1.16858	1.19518	1.17354	1.07299	1.0407	1.03186	1.1436	1.15696	1.16194	1.11885	1.17653	1.18151	1.1838	1.1348
2.06168	2.20311	2.45582	2.14458	2.41148	2.11806	2.30904	2.12213	2.34172	1.94682	2.22947	1.98123	2.09797	2.03334	1.97124	2.03311	2.03874	2.26704	2.20491	2.13889	1.88337	1.8657	1.65967	1.764	1.64106	1.70673	1.52709	1.40923	1.4265	1.36124	1.26007	1.19428	1.22857	1.38146	1.20003	0.982822	1.17742	1.2813	1.0802	1.134	1.07371	0.919592	0.925468	0.885913	0.815759	1.05569	1.04951	1.00388	0.997498	1.06174
1.63179	1.65709	1.65273	1.68942	1.61493	1.65103	1.69161	1.62655	1.64998	1.65709	1.69674	1.58022	1.58427	1.51876	1.52028	1.49998	1.46467	1.47961	1.41815	1.39609	1.44898	1.39042	1.33557	1.36303	1.30581	1.2512	1.3285	1.30467	1.32701	1.30218	1.31413	1.2756	1.36377	1.32896	1.26897	1.27636	1.28242	1.3131	1.33919	1.33598	1.42443	1.50622	1.43956	1.49172	1.3716	1.44756	1.41312	1.49061	1.41657	1.42007
0.908153	1.02604	1.10668	1.08061	0.954835	0.931375	0.965678	1.01449	1.00928	0.949762	0.853432	0.901961	0.896198	0.946844	0.89899	0.904965	0.892505	0.876924	0.82256	0.774018	0.763121	0.771644	0.850872	0.856929	0.825615	0.814889	0.882637	0.795774	0.743458	0.862527	0.700893	0.584775	0.621119	0.654111	0.643481	0.686965	0.60853	0.643237	0.70761	0.703896	0.72496	0.665009	0.707078	0.68437	0.745999	0.758438	0.781501	0.77665	0.818075	0.789999
0.788646	0.826615	0.800749	0.793584	0.78076	0.799952	0.774928	0.801415	0.797232	0.824108	0.823477	0.805525	0.859295	0.843071	0.841297	0.86208	0.824026	0.791995	0.803384	0.802328	0.82045	0.800824	0.814145	0.800277	0.785745	0.784069	0.720215	0.748932	0.75065	0.756403	0.72716	0.718587	0.691742	0.690124	0.690849	0.6908	0.695631	0.709123	0.68254	0.720923	0.750417	0.750562	0.768648	0.777792	0.741174	0.784493	0.79141	0.802042	0.800208	0.791133
1.0516	1.11152	1.05773	1.0601	1.03599	1.00118	0.982539	0.978279	1.03135	0.986693	0.98219	0.97196	1.02222	0.99994	1.01126	1.00253	1.02685	0.977619	0.987488	0.964203	0.889459	0.930359	0.953034	0.854885	0.835436	0.833649	0.846083	0.892675	0.912915	0.913758	0.856181	0.939224	0.884938	0.952287	0.928715	0.915781	0.938892	0.913529	0.951453	0.946053	1.00373	0.952174	0.941208	0.947122	0.91197	0.958754	0.988816	0.924482	0.959405	0.953045
0.534245	0.515428	0.536438	0.502631	0.546452	0.550305	0.514866	0.532828	0.535728	0.559807	0.564401	0.504004	0.523818	0.588431	0.550458	0.543777	0.517083	0.531197	0.536887	0.523573	0.602613	0.604064	0.618058	0.621033	0.632509	0.658099	0.686627	0.66117	0.668131	0.65018	0.65896	0.68412	0.763379	0.741318	0.711797	0.713149	0.777472	0.747464	0.789051	0.762701	0.782073	0.791893	0.82782	0.801592	0.865006	0.8757	0.889864	0.93509	0.87696	0.86377
1.37233	1.30589	1.45601	1.35951	1.30152	1.24385	1.25604	1.3437	1.30465	1.2916	1.34249	1.40254	1.32488	1.42171	1.45494	1.35938	1.3748	1.35945	1.32461	1.26969	1.34043	1.27753	1.23745	1.22134	1.23655	1.24453	1.23363	1.19998	1.23714	1.21568	1.20284	1.20668	1.20124	1.21788	1.13482	1.17801	1.14987	1.1984	1.18486	1.13603	1.14493	1.12511	1.05064	1.06359	1.05175	1.1112	1.17023	1.12605	1.1514	1.25384
0.935315	0.98201	0.985943	0.864571	0.954383	1.00433	1.04039	1.0381	1.10329	1.1226	1.08244	1.17847	1.0764	1.19045	1.13957	1.18774	1.1697	1.17875	1.06135	1.08256	1.02808	1.10524	1.16256	1.04808	1.14529	1.34555	1.3575	1.38951	1.27523	1.41783	1.35677	1.41242	1.42385	1.45591	1.48432	1.56233	1.51755	1.53889	1.57899	1.4946	1.62873	1.79415	1.52522	1.50328	1.60695	1.16372	1.08957	1.00616	1.19464	1.33078
1.17533	1.21773	1.20303	1.29637	1.3016	1.36314	1.34045	1.34609	1.3212	1.32661	1.29589	1.30979	1.44479	1.37737	1.38813	1.44257	1.34815	1.34025	1.29628	1.27776	1.22152	1.23047	1.23945	1.16961	1.16608	1.20829	1.25789	1.22432	1.25795	1.26181	1.27179	1.28347	1.32592	1.48611	1.40703	1.34473	1.35611	1.33135	1.41027	1.26364	1.13606	1.27007	1.25518	1.23463	1.1672	1.27543	1.20989	1.21684	1.35084	1.32087
2.04914	1.75489	1.8553	1.82437	1.87702	1.92945	1.93281	1.76285	1.83956	1.78068	1.71809	1.68983	1.57819	1.77561	1.63318	1.66459	1.76796	1.69904	1.70364	1.62606	1.81297	1.71913	1.73458	1.60331	1.57558	1.62425	1.70755	1.53759	1.65381	1.68247	1.51012	1.60503	1.52651	1.50215	1.53355	1.48549	1.42398	1.54193	1.63571	1.55985	1.52129	1.57982	1.57995	1.53035	1.47428	1.56308	1.44641	1.45456	1.53809	1.47049
1.42297	1.42105	1.45835	1.36169	1.36989	1.38802	1.33322	1.30349	1.27345	1.34885	1.29537	1.35316	1.29411	1.35102	1.32026	1.31425	1.25322	1.27149	1.18779	1.15308	1.17192	1.20193	1.19856	1.14549	1.09195	1.12697	1.12225	1.14082	1.09875	1.08362	1.03859	1.03933	1.00541	1.04494	1.02325	1.11469	1.19292	1.05557	1.06033	1.06542	1.15288	1.0646	1.01119	1.02535	1.10376	1.09237	1.11223	1.14085	1.18935	1.17997
0.734129	0.731191	0.746195	0.752724	0.737749	0.745677	0.726265	0.750822	0.745516	0.740649	0.743684	0.747229	0.697787	0.70001	0.720984	0.685077	0.688698	0.714988	0.729018	0.751304	0.722451	0.740576	0.717519	0.683201	0.68987	0.699292	0.686999	0.708464	0.693381	0.686283	0.742462	0.742659	0.695564	0.745762	0.748391	0.79293	0.750782	0.771475	0.753807	0.743292	0.732913	0.717899	0.752358	0.774888	0.811217	0.793106	0.813546	0.789903	0.723608	0.723145
0.688308	0.649646	0.643765	0.594232	0.59758	0.593194	0.611125	0.579361	0.565587	0.554674	0.556006	0.560324	0.547538	0.57569	0.566265	0.60036	0.569947	0.598089	0.575948	0.605097	0.588247	0.62043	0.630066	0.6255	0.630404	0.611813	0.637219	0.646325	0.661939	0.651883	0.657401	0.656426	0.675038	0.711327	0.720178	0.721365	0.773271	0.712425	0.757176	0.771014	0.809454	0.813656	0.802886	0.828058	0.790256	0.836803	0.821868	0.809129	0.78849	0.814532
0.937052	0.944866	0.894732	0.897283	0.885912	0.892851	0.914243	0.849875	0.825055	0.872191	0.867926	0.853215	0.82173	0.810299	0.766507	0.732349	0.743319	0.743838	0.703565	0.738671	0.732192	0.710358	0.691499	0.699499	0.69692	0.708016	0.689795	0.710291	0.6734	0.700837	0.693332	0.664517	0.686377	0.704013	0.689974	0.701701	0.744054	0.805175	0.765467	0.778797	0.787877	0.799979	0.792639	0.804265	0.862632	0.842492	0.846051	0.865289	0.869375	0.857041
0.898718	0.864915	0.902039	0.884331	0.838805	0.868826	0.880977	0.830036	0.81034	0.781931	0.768865	0.770061	0.764545	0.7719	0.772442	0.763956	0.743111	0.793578	0.764922	0.739745	0.775665	0.746704	0.761616	0.706853	0.720137	0.748988	0.720707	0.688251	0.712039	0.716864	0.656348	0.660409	0.637426	0.642395	0.629578	0.638997	0.671363	0.613832	0.616719	0.64712	0.615027	0.613211	0.657023	0.655672	0.642783	0.662059	0.65778	0.666261	0.644686	0.640629
0.570053	0.52687	0.534445	0.525247	0.535602	0.51756	0.50777	0.529514	0.564781	0.569254	0.576573	0.614898	0.564747	0.55435	0.580519	0.588549	0.593961	0.604026	0.570399	0.565743	0.613669	0.631684	0.639668	0.648035	0.630311	0.630824	0.614679	0.621384	0.604401	0.526902	0.562495	0.578042	0.626613	0.64162	0.658719	0.591162	0.624856	0.612486	0.618864	0.656605	0.69908	0.649753	0.773695	0.743883	0.703435	0.647329	0.666345	0.671876	0.616862	0.627221
1.11825	1.09348	1.09581	1.04282	1.04809	1.04041	1.03159	0.984684	1.00647	0.992698	0.993006	0.977648	0.981818	0.998036	0.975792	0.953322	0.94665	0.97113	0.970602	1.00382	0.989363	0.994774	1.02867	0.973126	0.943444	0.940787	0.919596	0.935745	0.945355	0.963927	0.99065	1.00565	0.923924	1.00483	1.04111	1.01692	0.978384	0.990082	0.973789	0.997896	0.984736	0.972612	0.988476	0.989872	0.947082	0.945261	0.945567	0.98138	1.02113	1.04785
0.791166	0.776241	0.71359	0.70535	0.708048	0.680219	0.659479	0.638855	0.647793	0.662493	0.624658	0.644428	0.616119	0.582829	0.619612	0.603329	0.579361	0.593321	0.572877	0.583624	0.551768	0.556735	0.564334	0.568184	0.542454	0.554735	0.568399	0.571869	0.574249	0.588543	0.574388	0.574444	0.579455	0.642775	0.675775	0.638162	0.641659	0.612354	0.640852	0.645478	0.668956	0.664485	0.644994	0.650408	0.641392	0.659716	0.677275	0.691876	0.694271	0.700102
1.09307	1.05966	1.00188	0.9829	1.0291	1.037	0.964914	0.940807	0.924228	0.902646	0.919091	0.887562	0.883861	0.898575	0.91718	0.920822	0.899574	0.857929	0.814729	0.844594	0.841622	0.838649	0.840232	0.852409	0.850182	0.849315	0.796721	0.795647	0.773429	0.777603	0.779812	0.776056	0.767542	0.767218	0.753757	0.753051	0.770521	0.764527	0.758802	0.776241	0.780548	0.830996	0.782631	0.761176	0.735194	0.762441	0.738793	0.763755	0.788559	0.799307
1.55159	1.54616	1.58217	1.48832	1.54624	1.48029	1.46662	1.45602	1.41159	1.41437	1.30951	1.38611	1.35325	1.31614	1.32709	1.27146	1.30454	1.23822	1.26215	1.18182	1.22025	1.18817	1.14629	1.14378	1.18901	1.17984	1.12083	1.17074	1.16788	1.16546	1.13305	1.04995	0.996132	1.05415	0.992545	1.02938	1.01199	1.04983	0.999017	0.983734	0.928652	0.971566	0.946951	0.923219	0.946911	0.990509	1.00675	0.955357	0.960421	0.936545
2.08072	1.75572	1.87469	1.86581	1.76996	1.7375	1.92773	1.72811	1.86267	1.96555	1.70636	1.86911	1.76701	1.69525	1.65807	1.72871	1.58735	1.81768	1.7381	1.63224	1.68613	1.79481	1.8197	1.72142	1.71688	1.70448	1.75915	1.79556	1.8705	1.78571	1.58507	1.75863	1.59241	1.58318	1.65247	1.75965	1.72363	1.95653	1.82919	1.97404	1.98872	1.75282	1.78878	1.87482	1.80126	1.89139	1.99788	1.94639	1.98363	2.06713
0.971456	0.964289	0.985597	0.960715	1.00571	0.993052	0.920841	0.874961	0.873555	0.894257	0.92763	0.870833	0.853754	0.882862	0.858015	0.862165	0.826437	0.834928	0.797443	0.774221	0.779659	0.776899	0.752067	0.757787	0.792073	0.787044	0.744111	0.746519	0.74346	0.750038	0.747935	0.687086	0.72888	0.823215	0.827724	0.807645	0.81791	0.815652	0.860812	0.825747	0.814749	0.829289	0.824395	0.813886	0.816373	0.816387	0.819546	0.803985	0.782516	0.779235
0.60454	0.596542	0.592167	0.599737	0.592883	0.573016	0.58407	0.563891	0.565046	0.566674	0.557762	0.572894	0.579505	0.593808	0.553018	0.561464	0.551042	0.57224	0.546397	0.547366	0.518933	0.557997	0.546556	0.572351	0.579669	0.544179	0.534914	0.524861	0.499212	0.484469	0.492226	0.482675	0.472408	0.458791	0.466176	0.456219	0.467339	0.477753	0.46148	0.457294	0.443329	0.443964	0.439406	0.436874	0.437431	0.414064	0.417362	0.42982	0.412618	0.412481
1.17971	1.18361	1.18022	1.20243	1.22318	1.1113	1.11619	1.11852	1.10074	1.10335	1.05374	1.02437	0.999227	1.00768	0.933509	0.922072	0.89008	0.906024	0.928004	0.912165	0.880155	0.870867	0.892009	0.926481	0.900865	0.903256	0.903284	0.876316	0.938888	0.945966	0.91361	0.866925	0.846257	0.86146	0.807355	0.819199	0.808477	0.862968	0.840639	0.846485	0.852904	0.87137	0.920917	0.867969	0.867025	0.899167	0.912944	0.893166	0.946315	0.907721
0.88857	0.900231	0.920796	0.983466	0.899967	0.890979	0.852259	0.812422	0.798055	0.743149	0.727579	0.784307	0.798445	0.815977	0.759276	0.743311	0.72277	0.714841	0.723825	0.702266	0.689392	0.72801	0.729275	0.729495	0.712693	0.713593	0.663848	0.676795	0.682429	0.681497	0.635218	0.661902	0.690675	0.689884	0.678979	0.64406	0.667173	0.617124	0.656507	0.668602	0.663566	0.620032	0.644994	0.596519	0.598954	0.603363	0.612237	0.612985	0.678177	0.670117
1.14726	1.08502	1.10094	1.15299	1.16521	1.21844	1.19983	1.1868	1.27972	1.2052	1.21811	1.25974	1.22985	1.22465	1.15193	1.16531	1.1379	1.23977	1.21102	1.20737	1.26106	1.18466	1.24952	1.30715	1.26088	1.16385	1.16917	1.09231	1.06506	1.10883	1.1207	1.06395	1.13775	1.15464	1.14734	1.09524	1.13791	1.12486	1.09731	1.09468	1.03762	1.08797	1.07718	1.12388	1.00326	1.0311	1.00171	1.02507	1.0497	1.11631
0.784625	0.757151	0.755225	0.769451	0.740523	0.785406	0.741326	0.681625	0.712968	0.722101	0.70847	0.721602	0.712253	0.689637	0.654507	0.634595	0.633464	0.65642	0.672152	0.645702	0.639173	0.616298	0.644921	0.611129	0.610117	0.584335	0.565194	0.549232	0.555579	0.568717	0.558146	0.543204	0.532856	0.542214	0.565944	0.548539	0.573356	0.559418	0.548126	0.550326	0.550047	0.547245	0.536755	0.546774	0.548639	0.552269	0.551784	0.580699	0.558265	0.554464
0.586193	0.572329	0.566767	0.572407	0.555534	0.543168	0.533408	0.547443	0.517975	0.515167	0.526824	0.545485	0.553052	0.587195	0.564918	0.549565	0.528213	0.535101	0.586068	0.598862	0.569876	0.549399	0.558585	0.543191	0.529506	0.546362	0.5532	0.555555	0.620133	0.578084	0.567755	0.554103	0.604178	0.627426	0.628683	0.620778	0.642387	0.640043	0.643839	0.634572	0.657019	0.622475	0.636421	0.633828	0.659212	0.646503	0.647291	0.643456	0.639291	0.635152
1.53705	1.37916	1.53687	1.42701	1.4186	1.46217	1.41358	1.37526	1.35176	1.33918	1.32103	1.31035	1.30382	1.28876	1.25664	1.41048	1.36802	1.29803	1.41995	1.33501	1.29272	1.24587	1.36168	1.23493	1.29526	1.187	1.16268	1.08505	1.05714	1.12192	1.03592	0.973053	0.965614	0.948309	0.959517	0.851102	0.830143	0.815382	0.817044	0.851852	0.917473	0.913796	0.850252	0.866826	0.929062	0.920191	0.922387	0.986647	1.05563	0.794044
1.04918	1.12253	1.07774	1.04214	1.01269	1.01774	1.1084	1.05384	1.08079	1.02749	1.06377	1.0243	0.953044	0.953581	0.873268	0.844551	0.832057	0.849786	0.854875	0.832284	0.832573	0.792279	0.813713	0.774896	0.779704	0.745749	0.726751	0.774584	0.754883	0.709882	0.747247	0.700067	0.733012	0.708104	0.805015	1.1308	0.768688	0.631324	0.459018	0.425707	0.33402	0.328287	0.405887	0.354021	0.873585	0.978654	0.998945	1.09693	1.06391	1.05909
0.534361	0.530324	0.543041	0.533098	0.543826	0.53381	0.545538	0.598068	0.538421	0.507988	0.472892	0.48121	0.486134	0.538033	0.475871	0.464653	0.454218	0.502389	0.514583	0.51949	0.549652	0.624068	0.592119	0.513636	0.273616	0.284506	0.327347	0.268081	0.213596	0.57175	0.82462	0.801695	0.493698	0.560081	0.483728	0.541257	0.455933	0.464512	0.48257	0.501233	0.613253	0.730432	0.71928	0.689369	0.675603	0.533979	0.541414	0.610106	0.656738	0.600031
0.552996	0.495759	0.513011	0.479312	0.50385	0.504075	0.524353	0.535601	0.544119	0.551667	0.532588	0.59326	0.618259	0.631848	0.646252	0.600599	0.58908	0.608583	0.63924	0.68737	0.700049	1.05182	0.584377	0.390283	0.359323	0.377294	0.409742	0.472494	0.819332	0.880205	0.914958	0.702156	0.774461	0.804935	0.762471	0.79217	0.823624	0.879402	0.793884	0.877918	0.843092	0.789532	0.856392	0.816484	0.748076	0.779168	0.843115	0.788246	0.751551	0.79612
2.11851	1.79925	1.83855	1.84102	1.93703	1.63276	1.77789	1.67013	1.71362	1.6044	1.44076	1.42718	1.50671	1.48746	1.39167	1.33345	1.26813	1.44899	1.42863	1.41665	1.31219	1.16708	1.21396	1.15232	1.15279	1.07985	1.06025	1.05961	1.02738	1.05318	1.00802	0.944729	0.971934	0.997464	0.959203	0.957857	0.917574	1.01494	0.92064	0.93695	1.02355	0.963768	0.95817	0.961686	0.9727	0.98511	0.989103	0.978489	0.992592	1.03976
0.70596	0.608318	0.630014	0.653241	0.636892	0.679186	0.676805	0.668389	0.672056	0.668651	0.660296	0.661454	0.616258	0.638207	0.578925	0.546098	0.562403	0.5414	0.510365	0.555499	0.532852	0.528765	0.512897	0.519496	0.542591	0.546629	0.566552	0.559129	0.546412	0.564136	0.595493	0.600172	0.594545	0.644032	0.687316	0.64351	0.604474	0.656417	0.635338	0.597604	0.620267	0.604878	0.614385	0.651144	0.676939	0.675492	0.685275	0.65471	0.676629	0.65202
1.47266	1.5033	1.4192	1.38415	1.2776	1.2412	1.16007	1.2004	1.08855	1.11089	1.08969	1.18197	1.11659	1.27154	1.35174	1.29216	1.25846	1.24263	1.19873	1.13427	1.19809	1.04497	1.06635	1.05819	1.07855	0.948866	0.922804	0.876452	0.843576	0.785714	0.825892	0.861068	0.90661	0.879024	0.825671	0.796917	0.835847	0.840233	0.827835	0.871189	0.875903	0.884896	0.961814	0.994641	0.994822	1.19751	1.15208	1.02698	1.09916	1.05411
1.35268	1.18706	1.3968	1.39201	1.44539	1.41059	1.41018	1.28726	1.11017	1.04485	0.872666	0.797999	0.774941	0.804144	0.770182	0.870702	0.784897	0.799983	0.791333	0.736618	0.757069	0.710532	0.764171	0.749179	0.677814	0.707542	0.693604	0.694297	0.64718	0.678364	0.614191	0.661609	0.628389	0.598011	0.621751	0.602996	0.623988	0.626797	0.622781	0.620218	0.623822	0.622475	0.639257	0.64783	0.648536	0.656173	0.653572	0.644134	0.695829	0.724665
1.13932	1.12235	1.11538	1.20085	1.17937	1.20877	1.17122	1.07585	1.1299	1.13678	1.13924	1.13376	1.08028	1.10011	1.05882	1.06962	1.07881	1.06985	1.09205	0.981461	1.03887	1.05724	1.11627	1.04676	1.09434	1.11348	1.11709	1.06601	1.12278	1.11487	1.05799	1.0654	1.13428	1.16936	1.14173	1.15289	1.19498	1.13122	1.14438	1.18077	1.14282	1.13184	1.06826	1.12501	1.11152	1.15016	1.12599	1.15383	1.11677	1.1491
1.33143	1.29707	1.31946	1.25748	1.18813	1.19215	1.20177	1.1745	1.18156	1.15486	1.1024	1.10554	1.09737	1.15392	1.10355	1.08894	1.03853	1.01306	0.98488	0.9576	0.964887	0.905026	0.914769	0.91735	0.873315	0.884337	0.882166	0.893487	0.875116	0.916723	0.90454	0.924012	1.02924	0.984115	1.03139	1.07618	0.99418	1.01536	1.08271	1.08764	1.18399	1.12098	1.25235	1.20322	1.24084	1.28817	1.22521	1.36016	1.42157	1.31765
1.17615	1.14199	1.1311	1.1562	1.17011	1.15014	1.17674	1.0897	1.07896	1.07504	1.03694	1.035	0.996523	0.968809	0.886051	0.871327	0.915111	0.842169	0.841158	0.90582	0.892601	0.88462	0.965703	0.877466	0.915106	0.954179	0.835977	0.849526	0.813644	0.851836	0.848884	0.88016	0.913981	0.990849	0.908134	0.911164	0.968192	0.971474	1.01012	1.01811	1.04275	1.0748	1.09836	1.11606	1.10399	1.10646	1.1939	1.15057	1.08883	1.09453
0.876787	0.932389	0.947229	0.966781	0.993878	0.996626	0.978568	0.935691	1.05215	1.09091	1.06211	1.05292	1.0188	1.15184	1.20553	1.19997	1.21263	1.27833	1.26065	1.24304	1.06859	1.18408	1.01856	0.983487	1.13139	1.14329	0.950354	0.94376	0.910706	1.03573	0.926291	0.927144	0.996923	1.07322	0.860072	1.02823	0.622284	0.932994	0.919708	0.805354	0.883967	0.825257	0.997633	0.80509	0.790077	0.704607	0.70974	0.866294	0.901537	0.879105
0.676672	0.693338	0.67212	0.663693	0.68824	0.654802	0.683101	0.671193	0.654702	0.685374	0.659406	0.67192	0.656911	0.679802	0.692053	0.68794	0.688049	0.668355	0.641491	0.64903	0.641759	0.644574	0.636291	0.630489	0.647966	0.621708	0.629911	0.634643	0.632059	0.632165	0.620397	0.637292	0.632399	0.643649	0.621294	0.620945	0.595931	0.610894	0.618614	0.620023	0.652346	0.626739	0.621084	0.622399	0.624346	0.619067	0.608646	0.603899	0.604973	0.614975
1.4971	1.41751	1.40712	1.34876	1.30771	1.26239	1.3111	1.25188	1.3147	1.18921	1.10869	1.11947	1.01284	1.0504	1.11097	1.11342	1.09627	1.14774	1.0681	1.10285	1.09094	1.0464	0.964427	1.08566	1.10008	0.996073	0.989089	1.01593	1.01147	0.974116	1.02389	1.06272	1.04778	1.10362	1.1946	1.19455	1.18376	1.24934	1.13099	1.09664	1.15948	1.09821	1.17726	1.18966	1.15289	1.15426	1.12631	1.20894	1.13163	1.10372
1.43166	1.59141	1.62379	1.68933	1.46915	1.6603	1.49756	1.42397	1.60104	1.47988	1.31719	1.31119	1.36895	1.39506	1.29465	1.26657	1.39973	1.42902	1.37026	1.36671	1.28431	1.35132	1.24384	1.419	1.38378	1.40667	1.43662	1.42806	1.42271	1.53549	1.49461	1.40822	1.36204	1.42351	1.38902	1.45703	1.50675	1.52414	1.55278	1.44561	1.38361	1.62985	2.0551	1.61643	1.63311	1.52337	1.70674	1.52572	1.56026	1.52474
0.867754	0.900309	0.885668	0.903888	0.868898	0.870003	0.843646	0.836406	0.812194	0.804431	0.738435	0.772674	0.769886	0.76838	0.79759	0.738753	0.705604	0.759268	0.729586	0.729697	0.750182	0.723134	0.724675	0.716436	0.699101	0.684364	0.629291	0.64827	0.661237	0.63986	0.662054	0.664812	0.691036	0.732004	0.699409	0.722264	0.726215	0.690722	0.66344	0.646866	0.669634	0.653432	0.642454	0.641372	0.62552	0.615874	0.598592	0.578181	0.584201	0.589517
1.17531	1.13835	1.07728	0.987161	0.976263	0.960943	1.00357	0.851185	0.896803	0.978707	0.979472	0.890512	0.870644	0.851751	0.851157	0.90904	0.855902	0.880521	0.896079	0.957716	0.928255	0.942817	0.888905	0.941448	0.919926	0.948551	0.967688	0.918474	0.981868	0.951191	0.905046	0.883446	0.877564	1.00739	0.995066	0.991477	1.03877	1.07649	1.10534	1.13794	1.12769	1.12317	1.19632	1.16909	1.13827	1.14919	1.15053	1.11914	1.12013	1.15927
1.30472	1.27468	1.3574	1.30086	1.2943	1.29823	1.26209	1.21194	1.19694	1.24545	1.22917	1.28766	1.21526	1.20352	1.22465	1.15806	1.11103	1.1707	1.15365	1.05158	1.04902	1.07276	1.17858	0.993863	0.955547	1.19884	1.24255	1.23455	1.19953	1.22342	1.20438	1.18185	1.20719	1.26941	1.22292	1.25648	1.14783	1.19512	1.15343	1.10817	1.07671	1.07393	1.12084	1.11479	1.0299	1.15794	1.13707	1.04723	1.06718	1.15302
1.29814	1.26892	1.58229	1.37295	1.36303	1.43589	1.53185	1.58932	1.70055	1.59093	1.73887	1.76442	1.53269	1.15666	1.13167	1.106	1.10979	1.28145	1.22931	1.56259	1.50808	1.18336	1.6042	1.2667	1.16858	1.33399	1.12453	1.18711	1.05258	0.944853	0.916765	1.07139	1.10076	0.991058	1.0634	1.09858	1.32206	1.45551	1.57915	1.7033	1.41726	1.68553	1.23053	1.56547	1.25265	1.25495	1.38731	1.26429	1.2681	1.38701
0.886919	0.883667	0.911691	0.921161	0.912549	0.908389	0.920152	0.887183	0.863276	0.867978	0.850797	0.837333	0.79765	0.824112	0.783073	0.750609	0.75212	0.768167	0.779696	0.749895	0.735234	0.754991	0.715414	0.726348	0.720191	0.71442	0.69512	0.660174	0.60879	0.581143	0.610779	0.56164	0.644877	0.635221	0.641741	0.641181	0.680784	0.650324	0.659515	0.644882	0.597069	0.650908	0.708126	0.675546	0.673188	0.676021	0.667453	0.665719	0.648029	0.66903
1.39065	1.33452	1.38741	1.15529	1.1518	1.20858	1.00915	1.1824	1.0554	1.2558	1.03623	0.886972	1.01375	0.992843	0.922357	1.06426	1.03751	1.43133	1.50749	1.34712	1.2328	1.22924	1.23066	1.2286	1.24206	1.5095	1.53306	1.41416	1.42493	1.40807	1.54307	1.39876	1.4019	1.50932	1.59296	1.62644	1.40475	1.48441	1.56501	1.64057	1.59634	1.57293	1.69772	1.58651	1.50753	1.58004	1.48298	1.47672	1.61379	1.73551
0.469432	0.470501	0.485363	0.469696	0.49445	0.466866	0.461807	0.458606	0.446478	0.453812	0.467494	0.523218	0.746766	0.52517	0.259954	0.190785	0.184014	0.176401	0.165856	0.134512	0.191506	0.720679	0.861594	0.684588	0.669011	0.579578	0.601508	0.565036	0.553189	0.57595	0.586964	0.568397	0.568996	0.604122	0.614548	0.604741	0.591024	0.638419	0.632947	0.651533	0.638008	0.6593	0.690052	0.680805	0.675295	0.669641	0.696604	0.660628	0.754603	0.742341
1.07506	0.997721	0.885709	0.810384	0.810557	0.875013	0.745616	0.790128	0.85338	0.864797	0.838537	0.852644	0.832414	0.900981	0.888712	0.928737	0.912152	0.942932	0.880079	0.904139	0.88001	0.941826	0.96592	0.9102	0.826202	0.855932	0.856988	0.910507	0.951276	0.938574	0.903847	0.867245	0.867546	0.859681	0.861218	0.86952	0.880799	0.822308	0.849892	0.818977	0.823155	0.811497	0.844903	0.864145	0.867918	0.840249	0.846894	0.804208	0.7985	0.801592
1.14561	1.14257	1.09534	1.06807	1.03112	1.07518	1.02965	1.05614	1.02011	1.03453	1.05911	1.00545	1.00924	1.03442	1.04108	1.03322	1.01775	0.951195	0.946215	0.943636	0.941419	0.930769	0.923659	0.925507	0.924425	0.922703	0.901173	0.889108	0.915939	0.938546	0.947016	0.964448	0.887254	0.940945	0.910487	0.888531	0.871027	0.84677	0.878895	0.881626	0.888122	0.894749	0.889177	0.897069	0.898128	0.831871	0.898616	0.925642	0.92765	0.944517
0.861607	0.800924	0.792093	0.780108	0.717307	0.720322	0.740938	0.768692	0.767654	0.734638	0.817303	0.83878	0.777994	0.784749	0.791653	0.772858	0.708301	0.637957	0.618003	0.633849	0.544896	0.484837	0.502591	0.455096	0.54866	0.514636	0.534261	0.561888	0.525096	0.626819	0.613327	0.624024	0.642459	0.613716	0.547633	0.560858	0.581198	0.556424	0.640941	0.717155	0.682844	0.654523	0.674571	0.705951	0.697651	0.693738	0.692125	0.589007	0.507544	0.481149
0.91487	0.837746	0.755026	0.475256	0.563734	0.747802	0.67999	0.670848	0.616781	0.65195	0.700187	0.6934	0.652281	0.705705	0.697753	0.74491	0.718841	0.725879	0.803283	0.789945	0.785738	0.827564	0.788117	0.748554	0.701956	0.762965	0.78933	0.840306	0.873303	0.909183	0.937328	0.910052	0.978962	1.08428	1.11872	1.11959	1.18252	1.10182	1.14359	1.16681	1.05775	1.14798	1.09598	1.10286	1.17773	1.12181	1.11653	1.24856	1.20413	1.06254
0.672397	0.65915	0.710066	0.693939	0.716442	0.697884	0.69851	0.669007	0.65326	0.677543	0.689955	0.677702	0.675574	0.674451	0.673941	0.68406	0.695255	0.702476	0.694676	0.720032	0.682803	0.692728	0.666298	0.684998	0.692881	0.646018	0.656951	0.663995	0.674231	0.663606	0.701632	0.692223	0.69801	0.724156	0.73533	0.727717	0.729556	0.75622	0.785697	0.746051	0.70752	0.754479	0.784607	0.72575	0.78182	0.745159	0.7226	0.768249	0.78215	0.720719
1.67689	1.48446	1.30767	1.40145	1.26513	1.49773	1.44438	1.39626	1.42768	1.46669	1.53297	1.58314	1.44288	1.46563	1.53284	1.54188	1.59524	1.70084	1.54516	1.66294	1.66708	1.54404	1.51992	1.63235	1.55642	1.51943	1.62585	1.58251	1.65594	1.76077	1.66674	1.53708	1.50167	1.40141	1.34298	1.50101	1.63729	1.66879	1.62545	1.46758	1.50005	1.44594	1.57653	1.5454	1.54101	1.41413	1.37361	1.48818	1.50307	1.6867
2.37599	2.41112	2.48537	2.58188	2.59764	2.53754	2.61835	2.53019	2.55405	2.59444	2.2118	2.09169	1.99193	1.94744	1.78923	1.88503	1.92731	1.91684	1.72514	1.76045	1.636	1.60492	1.64447	1.50102	1.47514	1.42069	1.29097	1.3406	1.3364	1.30882	1.30452	1.35123	1.29484	1.35514	1.36955	1.47635	1.39573	1.46538	1.33995	1.29406	1.2834	1.33752	1.33739	1.26542	1.20636	1.26328	1.37602	1.53583	1.56389	1.58872
1.58414	1.4493	1.57528	1.53424	1.50892	1.50843	1.49623	1.47666	1.48564	1.40701	1.3778	1.44657	1.39768	1.45409	1.43849	1.46069	1.34425	1.41939	1.43356	1.55177	1.47068	1.48502	1.58229	1.54687	1.57464	1.54354	1.65263	1.61702	1.68756	1.66537	1.52324	1.63929	1.61744	1.58638	1.42564	1.58451	1.61868	1.50644	1.58067	1.62541	1.72703	1.7358	1.62527	1.75764	1.68709	1.80321	1.79859	1.79354	1.74021	1.92692
0.463852	0.493094	0.648833	0.818458	0.133554	0.103835	0.106268	0.0980393	0.0869784	0.181615	0.841453	0.935034	0.992176	0.745083	0.522751	0.521645	0.616749	0.590874	0.577503	0.572275	0.554253	0.587075	0.588579	0.629723	0.579506	0.559853	0.560015	0.573474	0.528948	0.534501	0.549418	0.531818	0.54637	0.571512	0.580518	0.556373	0.561961	0.586863	0.585214	0.574178	0.594403	0.59646	0.612496	0.6261	0.606099	0.636434	0.650385	0.665444	0.673799	0.686921
0.529117	0.554777	0.579093	0.594952	0.592461	0.597491	0.599221	0.588612	0.604256	0.594086	0.579048	0.594467	0.616508	0.64366	0.670259	0.673123	0.648342	0.673759	0.670612	0.645919	0.681982	0.713582	0.689263	0.694972	0.721248	0.702998	0.718879	0.723255	0.756513	0.770468	0.792059	0.798091	0.826605	0.834632	0.814112	0.829353	0.836698	0.8663	0.887684	0.860901	0.905672	0.912736	0.979805	0.915636	0.836673	0.849251	0.899275	0.896398	0.933783	0.90316
0.716944	0.703337	0.719067	0.709156	0.685012	0.704739	0.695806	0.705185	0.662184	0.626674	0.663644	0.702505	0.701568	0.730264	0.716153	0.734535	0.70622	0.697675	0.765525	0.816462	0.80945	0.800154	0.857377	0.812218	0.80486	0.750583	0.783226	0.703347	0.679699	0.756391	0.741605	0.71527	0.750506	0.743637	0.721084	0.743446	0.776476	0.74949	0.740639	0.746642	0.644848	0.66295	0.63807	0.621979	0.577764	0.546097	0.508822	0.532017	0.597167	0.560775
0.918591	0.903215	0.952939	0.965208	0.992892	0.995973	1.01747	1.00055	1.00426	0.933691	0.899466	0.872171	0.867825	0.911591	0.959155	0.96408	0.998049	0.986757	0.97426	0.968072	0.933496	0.983356	0.965761	0.942379	0.906244	0.862419	0.811622	0.797907	0.778477	0.849635	0.802242	0.823414	0.764675	0.812327	0.846132	0.822111	0.797493	0.80907	0.805944	0.85915	0.827869	0.848314	0.788795	0.768488	0.772885	0.773616	0.795876	0.752871	0.789777	0.789403
1.79	1.81977	1.94791	1.95944	1.9616	1.82685	1.95472	1.81187	1.99008	1.71362	1.87129	1.78174	1.78772	1.62735	1.53556	1.64165	1.55003	1.66385	1.60981	1.65766	1.70712	1.55592	1.42623	1.48558	1.44425	1.39106	1.37417	1.39241	1.32213	1.3641	1.37819	1.37431	1.39274	1.41167	1.3167	1.39757	1.43192	1.53199	1.5137	1.42878	1.37166	1.46704	1.41101	1.34389	1.38228	1.47666	1.48871	1.48599	1.47853	1.50872
1.56317	1.59561	1.55541	1.50223	1.52294	1.48162	1.52963	1.52284	1.4298	1.4182	1.29886	1.36193	1.32283	1.29756	1.37948	1.25233	1.22969	1.29244	1.23419	1.35819	1.46625	1.3296	1.39481	1.30083	1.34675	1.31348	1.26573	1.34499	1.40555	1.45459	1.30039	1.31386	1.28277	1.30686	1.30646	1.37471	1.4173	1.43895	1.45242	1.48755	1.48945	1.34245	1.52673	1.49101	1.40649	1.48563	1.52109	1.42912	1.34172	1.42788
1.17475	1.12888	1.06573	1.04602	1.00996	0.967842	0.983432	0.967766	0.956636	0.883177	0.83132	0.811493	0.759374	0.808524	0.801643	0.853156	0.767107	0.761263	0.809288	0.801945	0.748724	0.767072	0.760438	0.806091	0.7787	0.769127	0.758476	0.756335	0.726426	0.754707	0.759584	0.794407	0.785397	0.822603	0.816707	0.792996	0.819547	0.784335	0.828341	0.808012	0.815009	0.801845	0.870186	0.825489	0.874739	0.902415	0.94448	0.941004	0.890203	0.88745
2.65869	2.58952	2.682	2.61669	2.9301	2.45684	2.22919	1.89237	1.82311	2.24174	2.10443	1.84503	1.81699	1.83891	1.77078	1.67401	1.64157	1.62219	1.38564	1.34823	1.3402	1.22466	1.21426	1.15507	1.19835	1.20625	1.19802	1.11373	1.09493	1.09694	1.10415	1.03783	1.06889	1.03018	1.07206	1.05202	1.04849	1.07937	1.09381	0.996402	0.935317	0.926566	0.898884	0.936487	0.986275	0.952715	0.973457	0.882708	0.89606	0.857676
1.35057	1.49842	1.49325	1.93787	1.34918	1.48662	1.61189	1.32891	1.2007	1.39392	1.13693	1.23552	1.24816	1.17426	1.2046	1.19591	1.17064	1.24216	1.0987	1.15522	1.11648	1.20532	1.22253	1.11687	1.13025	1.15699	1.09831	0.977949	1.13793	1.09675	1.05557	0.979289	1.02627	1.09839	1.06117	1.11006	1.04369	1.0384	1.03311	1.01934	1.04305	1.06675	1.23313	1.03664	1.10967	1.15746	1.13026	1.22328	1.02902	1.11803
0.618006	0.636458	0.670429	0.672061	0.68501	0.695048	0.711657	0.7238	0.766214	0.741909	0.77188	0.788133	0.771892	0.778202	0.73821	0.768316	0.721187	0.694056	0.730697	0.722014	0.736507	0.746649	0.730274	0.730096	0.727866	0.706874	0.74434	0.710763	0.746907	0.702089	0.71406	0.681836	0.70225	0.714244	0.7124	0.728079	0.68932	0.681994	0.700396	0.728094	0.718817	0.707391	0.697105	0.713504	0.719402	0.733136	0.700014	0.699739	0.78234	0.766915
1.5113	1.42935	1.30117	1.48319	1.37971	1.3314	1.19996	1.27423	1.29009	1.25881	1.36191	1.33998	1.44439	1.43621	1.3419	1.28208	1.27191	1.23817	1.29561	1.35894	1.37999	1.39722	1.37283	1.34939	1.37252	1.45074	1.39361	1.32332	1.29104	1.33445	1.29748	1.26745	1.1995	1.32774	1.28103	1.5383	1.49244	1.5231	1.52856	1.4432	1.56828	1.49214	1.37481	1.30666	1.33023	1.44332	1.48517	1.69323	1.63448	1.4641
0.696091	0.732477	0.738352	0.745946	0.762429	0.806897	0.752852	0.727774	0.709584	0.706734	0.720949	0.743637	0.737016	0.739623	0.762258	0.784357	0.814861	0.775506	0.80242	0.79613	0.771849	0.791803	0.812779	0.797092	0.816828	0.835752	0.84408	0.792261	0.793317	0.794175	0.745465	0.683688	0.675529	0.792209	0.790985	0.842793	0.875238	0.889563	0.866894	0.90117	0.922707	0.890932	0.980261	1.10572	1.00316	1.01266	1.03865	0.94622	0.976786	0.995212
0.391475	0.398918	0.389432	0.381155	0.402856	0.419858	0.478522	0.539741	0.614984	0.651435	0.678461	0.706716	0.730062	0.781941	0.835209	0.852272	0.860495	0.887777	0.891036	0.801746	0.76409	0.780641	0.897956	0.848955	0.87869	0.936322	0.994463	1.00439	0.927202	0.844319	0.821609	0.810275	0.736026	0.711414	0.720881	0.680423	0.691422	0.696745	0.643538	0.575354	0.675246	0.628958	0.607645	0.597902	0.595519	0.61188	0.574617	0.712329	0.710574	0.812077
0.929324	0.957318	0.957025	0.983444	1.01776	1.05091	0.99715	0.99257	0.963952	0.953395	0.970805	0.931819	0.946069	0.947096	0.918693	0.899548	0.907057	0.915485	0.861787	0.832009	0.82276	0.82051	0.761018	0.736505	0.78067	0.728976	0.671182	0.646484	0.631756	0.593894	0.61632	0.583775	0.593212	0.526954	0.563684	0.562903	0.583278	0.562238	0.54352	0.614249	0.608302	0.626715	0.560102	0.537215	0.560625	0.578109	0.563774	0.61839	0.631071	0.632219
1.13257	1.06019	1.07473	1.07041	1.05769	1.04549	1.08928	1.08148	1.11958	1.14091	1.08001	1.11753	1.15861	1.12438	1.14951	1.14222	1.1701	1.13739	1.12449	1.14331	1.10961	1.15301	1.0568	1.06885	1.11495	1.06144	1.05231	1.15363	1.16857	1.2023	1.10952	1.05659	1.03877	1.14306	1.05611	1.17625	1.22873	1.13456	1.28923	1.30868	1.23792	1.3285	1.33436	1.26418	1.39683	1.35153	1.42161	1.32848	1.28796	1.36254
1.02735	1.04436	1.02626	1.09534	1.06355	1.04196	1.00975	0.935951	0.99516	1.04814	0.978287	0.954389	0.957411	1.02936	1.00769	0.992729	1.01667	1.09355	1.07992	1.06294	1.04192	1.01668	1.0127	0.998925	0.979103	0.996223	0.978044	0.962927	1.00195	1.00103	1.01292	1.01608	1.03727	0.995879	0.986048	0.952352	0.993752	1.03973	1.06727	1.05267	1.05695	1.08075	1.06619	1.06426	1.00983	1.04961	1.12597	1.10489	1.07938	1.10035
0.942766	1.02151	0.975716	0.439529	0.513518	0.513831	0.510814	0.986404	0.998948	1.03441	1.02776	1.04253	1.10705	1.08846	1.04205	0.996254	0.950462	0.993359	0.898903	0.782524	0.765994	0.699987	0.722804	0.737188	0.690974	0.677282	0.783261	0.689219	0.652112	0.666998	0.670248	0.627384	0.675613	0.627167	0.581276	0.539307	0.580268	0.504006	0.51518	0.659629	0.691673	0.687687	0.698038	0.733485	0.726685	0.668688	0.719295	0.719129	0.629848	0.661004
0.779384	0.775496	0.774145	0.774758	0.72933	0.817471	0.78045	0.796373	0.770176	0.779422	0.755917	0.761599	0.803449	0.814792	0.784477	0.808173	0.832253	0.814621	0.814413	0.766383	0.778748	0.699077	0.745261	0.738095	0.712626	0.703911	0.715565	0.760147	0.752564	0.752449	0.711492	0.703927	0.789315	0.78233	0.786843	0.782916	0.772749	0.75489	0.773071	0.756155	0.831649	0.83435	0.834992	0.889673	0.895057	0.907533	0.925117	0.954862	0.924972	0.961454
0.752909	0.784724	0.813413	0.890786	0.912659	0.841876	0.852062	0.758826	0.783981	0.755838	0.714447	0.67372	0.696898	0.718257	0.699349	0.746176	0.845653	0.797257	0.744977	0.694416	0.650813	0.685092	0.682449	0.912459	0.926786	0.868575	0.849973	0.841193	0.878332	0.841491	0.697248	0.594421	0.551642	0.204833	0.490449	0.56845	0.680539	0.581483	0.605191	0.591535	0.54457	0.539215	0.476479	0.459349	0.502331	0.61116	0.569043	0.694936	0.693369	0.717313
0.639317	0.670134	0.666944	0.663398	0.65164	0.620497	0.62174	0.610727	0.619159	0.582007	0.556833	0.549832	0.566055	0.537701	0.545656	0.51705	0.528491	0.509893	0.504705	0.502717	0.496862	0.494711	0.49784	0.476088	0.475889	0.449395	0.461771	0.442729	0.444659	0.460967	0.472144	0.471544	0.469061	0.494034	0.454697	0.482037	0.50054	0.512111	0.492529	0.509646	0.490086	0.483907	0.48657	0.503806	0.489037	0.483956	0.478424	0.495152	0.481571	0.481085
0.403066	0.436193	0.471718	0.474147	0.491933	0.330498	0.327413	0.447843	0.413434	0.415894	0.467015	0.434729	0.427232	0.39826	0.406327	0.419093	0.63183	0.66978	0.759115	0.78652	0.786898	0.763073	0.68261	0.807204	0.826458	0.856787	0.926479	0.932018	0.922697	0.853046	0.851061	0.839611	0.88866	0.947893	0.939402	0.894369	0.7831	0.893843	0.940996	0.758282	0.824729	0.895227	0.803844	0.826436	0.823075	0.818936	0.765263	0.798367	0.796131	0.789403
0.959957	0.989985	0.94348	0.87466	0.867455	0.854666	0.845016	0.857748	0.840934	0.916046	0.939033	0.902401	0.893961	0.93226	0.916106	0.902182	0.951674	0.987276	0.964804	0.968742	0.948083	0.985493	0.987425	0.996556	1.04427	1.05247	1.04996	1.02679	1.04133	1.11337	1.09034	1.13763	1.25775	1.25922	1.18979	1.28361	1.27731	1.40154	1.35162	1.37439	1.44458	1.47712	1.42597	1.5139	1.40609	1.37534	1.37839	1.43188	1.36508	1.36166
0.713841	0.751652	0.706451	0.701087	0.699656	0.694254	0.711647	0.67708	0.671718	0.657343	0.677638	0.676814	0.655337	0.641423	0.619168	0.632186	0.672002	0.654615	0.621856	0.628044	0.668618	0.621512	0.609065	0.595151	0.595857	0.605461	0.609345	0.614733	0.619952	0.631418	0.637332	0.64166	0.635615	0.671682	0.647845	0.684021	0.687423	0.69986	0.686313	0.698322	0.70794	0.675268	0.699092	0.722243	0.693469	0.710963	0.661237	0.700574	0.710582	0.717425
0.854466	0.790776	0.765778	0.723799	0.718459	0.739964	0.696605	0.717369	0.691493	0.678659	0.689195	0.720669	0.644838	0.737602	0.770407	0.805084	0.860735	0.837485	0.823003	0.862264	0.861528	0.87031	0.852442	0.774107	0.778792	0.750512	0.741237	0.664357	0.70788	0.760461	0.865159	0.902932	0.92186	0.951577	0.938926	0.92771	1.02086	1.0026	0.980443	0.946184	1.06776	1.00372	1.00764	1.09952	1.01326	1.05095	1.07318	1.07346	1.08197	1.01701
1.04471	1.13427	1.16995	1.14424	1.13654	1.19876	1.25647	1.14607	1.16935	1.15949	1.17847	1.18512	1.24377	1.24604	1.28236	1.33105	1.34186	1.24679	1.18818	1.20978	1.16464	1.19432	1.21924	1.19833	1.24267	1.2273	1.29374	1.24159	1.29171	1.28423	1.28612	1.23095	1.12358	1.28417	1.21251	1.15003	1.12609	1.10666	1.06563	1.08679	1.06018	1.05882	1.06263	1.09067	1.10256	1.12317	1.03763	1.0726	1.01092	1.15618
0.81184	0.8099	0.839302	0.825669	0.820335	0.824732	0.774325	0.773364	0.786299	0.729731	0.749163	0.737926	0.732187	0.713185	0.719292	0.703137	0.682048	0.729315	0.708811	0.711411	0.731079	0.681159	0.689792	0.652943	0.634119	0.599193	0.598939	0.608027	0.602777	0.624792	0.610519	0.624376	0.637138	0.654289	0.657214	0.694272	0.621283	0.672798	0.651934	0.667644	0.680445	0.67632	0.668194	0.672207	0.715771	0.693825	0.684301	0.668853	0.686325	0.663001
1.00972	1.02902	1.01417	0.995921	0.980967	0.901195	0.973518	1.04809	1.01108	1.04276	0.99512	0.80862	0.820642	0.856792	0.84151	0.851365	0.817534	0.800586	0.793129	0.728315	0.734471	0.684001	0.711852	0.706795	0.736308	0.768727	0.744548	0.844395	0.848388	0.886232	0.884538	0.880438	0.922448	0.97543	0.915753	0.901552	0.892817	0.925676	0.914271	0.937031	0.991585	0.935702	0.912744	0.994181	0.978463	0.942618	0.967404	0.921478	0.950437	0.956158
0.87145	0.788776	0.855783	0.926991	0.881562	0.914152	0.861541	0.900065	0.933878	0.919735	0.94347	0.907757	0.959512	0.953911	0.965603	0.977855	0.915885	0.97442	0.937436	0.934844	0.901819	0.907167	0.918775	0.934954	0.946236	0.945904	0.971458	0.908037	0.930778	0.909263	0.964219	0.959203	0.987588	0.939302	0.886953	0.90632	0.925538	0.94403	0.950531	0.926356	0.934746	1.0283	1.01817	1.02622	0.984452	1.00589	1.0202	1.04605	1.04355	1.03504
1.24212	1.15447	1.1884	1.35799	1.31168	1.2694	1.24984	1.18633	1.20339	1.09208	1.07864	1.10854	1.01767	1.10467	1.04166	1.09563	1.02367	1.02836	1.00554	1.16766	1.19497	1.06057	1.07447	1.08138	1.11067	0.98271	0.972887	0.97646	1.02236	1.11512	1.18427	1.25032	1.1482	1.10389	0.958525	0.914627	0.974211	0.995237	0.95326	0.978007	1.00545	1.12845	1.21484	1.10519	1.05892	1.01264	0.963106	1.10279	1.13474	1.22668
0.894276	0.849545	0.884934	0.836788	0.894638	0.842163	0.8593	0.870425	0.909625	0.836771	0.840464	0.834067	0.862762	0.969168	0.826941	0.852201	0.830126	0.778254	0.818685	0.785529	0.88604	0.825882	0.821328	0.794554	0.853906	0.768103	0.802307	0.810255	0.743709	0.918329	0.790513	0.746081	1.04649	0.940148	0.888881	0.913878	0.857118	0.866168	0.866151	0.765224	0.865831	0.816473	0.824068	0.800954	0.788731	0.8203	0.800581	0.767419	0.751817	0.743813
0.575603	0.600327	0.606407	0.612087	0.623733	0.643331	0.632228	0.619059	0.651291	0.690044	0.64044	0.640896	0.646619	0.633116	0.640086	0.632346	0.611736	0.594359	0.633088	0.655221	0.637187	0.617966	0.670982	0.634674	0.634176	0.637799	0.603228	0.652195	0.666088	0.668381	0.654751	0.655691	0.648186	0.664146	0.654406	0.63866	0.656502	0.620792	0.617634	0.67433	0.68696	0.679663	0.626727	0.667224	0.633446	0.675249	0.672998	0.687105	0.657001	0.639208
1.53504	1.32964	1.30274	1.30806	1.29444	1.27334	1.48661	1.38751	1.37939	1.37395	1.30663	1.31397	1.22803	1.27175	1.20204	1.15953	1.16816	1.32392	1.3737	1.38928	1.44127	1.44416	1.48427	1.46152	1.5036	1.50379	1.50355	1.54123	1.59679	1.53263	1.41202	1.47404	1.436	1.32253	1.31985	1.38724	1.41866	1.47753	1.51505	1.44797	1.43041	1.43565	1.48119	1.47554	1.4145	1.41182	1.42339	1.39818	1.34638	1.38258
1.34599	1.21039	1.2654	1.20575	1.17946	1.1155	1.13033	1.12324	1.13281	1.02493	0.946305	0.963014	0.910581	0.950933	0.855373	0.906572	0.910163	1.07205	0.966928	1.07516	1.09462	1.02013	1.05216	0.998399	0.977539	0.949107	0.967359	0.999406	0.964781	0.965888	1.04594	1.02058	1.01435	1.00249	1.01602	1.07368	1.14258	1.15503	1.06537	0.948689	0.928462	0.945879	0.959361	0.920964	0.979118	0.89246	0.926258	0.917426	0.869534	0.872722
0.975118	0.994797	1.08594	1.05274	1.09785	1.09066	1.09313	1.01863	0.988279	1.07268	1.12792	1.06409	1.01926	1.03565	1.01697	1.09377	1.03422	1.12903	1.09229	1.1006	1.09258	1.18649	1.06919	1.17301	1.17352	1.106	1.1751	1.13827	1.14868	1.16286	1.16375	1.16276	1.11371	1.06752	1.15643	1.02965	1.11932	1.15508	1.02516	1.13347	1.17749	1.07333	1.08623	1.04944	1.03915	0.984917	1.08192	1.09011	1.11624	1.07082
0.896548	0.856689	0.905261	0.846412	0.79464	0.793197	0.844239	0.826922	0.842414	0.837592	0.859327	0.820041	0.824562	0.793902	0.824827	0.830412	0.823459	0.8323	0.799748	0.78845	0.801316	0.797295	0.843458	0.80195	0.757777	0.783122	0.740033	0.722769	0.726837	0.705471	0.71103	0.694234	0.655058	0.646662	0.645074	0.643644	0.657841	0.67654	0.671509	0.689701	0.708759	0.690162	0.708413	0.694793	0.701743	0.688926	0.690165	0.745327	0.799511	0.803891
2.71745	2.38247	2.86155	2.60268	2.54545	2.34592	2.54487	2.17389	2.31421	2.30265	2.22079	2.04238	2.2862	2.14071	1.98641	2.13576	2.03176	2.2434	2.21142	2.24062	2.07414	2.25605	2.30397	2.15815	2.06908	2.05107	2.10598	1.93911	2.26295	1.92909	1.84895	1.8242	1.89448	1.89101	1.80699	1.88861	1.87085	2.18378	1.99734	1.85731	1.95453	1.9349	2.16633	1.98916	1.82367	1.89203	1.95341	1.81773	1.83962	1.97572
1.00317	1.06922	1.06247	1.04057	1.03667	1.04193	1.02624	1.00075	1.00139	1.02281	1.05181	1.03022	1.04765	1.065	1.04296	1.01642	0.999887	0.991924	0.943552	0.941812	0.953448	0.937007	0.927163	0.938656	0.894808	0.882426	0.888778	0.925512	0.946889	0.900259	0.878098	0.903002	0.917018	0.930116	0.943694	0.928914	0.895798	0.912912	0.895984	0.95032	0.979091	0.94485	0.952617	0.958286	0.953759	1.02407	0.972471	0.962912	0.959834	0.944602
1.15304	1.12035	1.12247	1.19191	1.17454	1.16325	1.17023	1.08834	1.08728	1.08343	1.05893	1.07186	1.1417	1.07911	1.10359	1.11795	1.13216	1.20294	1.19491	1.22436	1.18467	1.16047	1.09936	1.07259	1.07551	1.08671	1.07673	1.02894	1.07514	0.937977	0.915298	0.919911	0.957182	0.94882	0.885026	0.873542	0.898187	0.840894	0.853545	0.871619	0.8736	0.871789	0.877744	0.914427	0.925072	0.900888	0.913151	0.843992	0.877233	0.854646
0.643946	0.631029	0.611685	0.602426	0.592388	0.574264	0.545708	0.523852	0.510886	0.502418	0.482358	0.501449	0.480952	0.481304	0.467797	0.479147	0.481491	0.49454	0.516909	0.49868	0.519551	0.493564	0.526099	0.494846	0.496353	0.473312	0.475272	0.457831	0.45695	0.453037	0.465065	0.449319	0.45065	0.461231	0.443156	0.456343	0.448367	0.444705	0.467664	0.461385	0.425219	0.446723	0.451037	0.458576	0.475983	0.483213	0.476814	0.479247	0.475234	0.475181
1.23368	1.13451	1.13021	1.05059	1.03738	1.04913	1.00882	0.972125	0.958969	0.894811	0.852423	0.873387	0.944905	0.923232	0.829695	0.81357	0.771987	0.7603	0.770591	0.695322	0.719999	0.700956	0.639292	0.561636	0.562036	0.565056	0.585796	0.574675	0.641146	0.620935	0.65213	0.619975	0.667379	0.690383	0.757798	0.763459	0.787119	0.761027	0.781566	0.796132	0.78627	0.754859	0.717399	0.712563	0.770792	0.841022	0.810899	0.894603	0.923826	0.927586
0.666608	0.67095	0.714413	0.719032	0.7213	0.724489	0.715575	0.724394	0.712001	0.730426	0.71581	0.692969	0.695769	0.707806	0.708657	0.7113	0.667222	0.662408	0.671097	0.655129	0.631834	0.616893	0.616966	0.600133	0.57061	0.573451	0.559907	0.602974	0.598596	0.594985	0.581768	0.592642	0.577639	0.582282	0.537245	0.479247	0.510586	0.456453	0.446351	0.537064	0.582505	0.539974	0.507445	0.6165	0.647371	0.760733	0.791048	0.126765	0.110898	0.140376
0.885371	1.08379	1.08166	1.21122	1.28757	1.27178	1.45898	1.14033	1.04457	1.00224	0.794052	0.740499	0.675331	0.714513	0.744198	0.654056	0.679285	0.633529	0.647736	0.604711	0.597638	0.609263	0.592064	0.634384	0.640752	0.639987	0.597152	0.588435	0.616039	0.631639	0.624382	0.652092	0.626704	0.660912	0.634669	0.642039	0.64423	0.614058	0.610572	0.648603	0.636486	0.646739	0.659842	0.642972	0.626487	0.661353	0.666791	0.681162	0.668638	0.663006
2.04327	1.78269	1.79614	1.73322	1.75378	1.41679	1.60918	1.58086	1.87162	2.15636	2.05369	2.23701	2.35964	2.09343	1.95924	1.93385	1.79866	2.01794	2.03213	2.0811	1.87942	2.00824	1.89417	1.74935	1.83372	1.93396	1.69598	1.67118	1.59905	1.61292	1.42152	1.28702	1.38084	1.32684	1.03836	1.045	1.05202	0.908732	0.926571	0.841633	0.941981	1.04	1.21349	1.36021	1.36788	1.37517	1.55947	1.65512	1.5776	1.46919
1.30047	1.28912	1.31248	1.27043	1.14021	1.06578	1.05517	1.04255	1.01049	1.03134	1.01525	1.06851	1.17705	1.1655	1.20342	1.17362	1.1242	1.13975	1.1599	1.13206	1.02637	1.05589	1.01888	0.928109	1.07131	1.11674	1.16393	1.18929	1.2233	1.2411	1.29119	1.33444	1.12836	1.24869	1.16433	1.24856	1.23326	1.18172	1.2648	1.26875	1.27274	1.38961	1.40154	1.35774	1.35445	1.20176	1.18867	1.1441	1.14247	1.20125
1.38951	1.44609	1.42133	1.40475	1.39483	1.31582	1.39079	1.2295	1.25582	1.30207	1.2523	1.21454	1.23803	1.21861	1.15981	1.15213	1.12545	1.22691	1.17943	1.19572	1.3321	1.27919	1.28586	1.21875	1.24119	1.16219	1.26945	1.20602	1.26342	1.31775	1.2594	1.23525	1.22225	1.25642	1.27965	1.25379	1.22804	1.35705	1.38276	1.3204	1.27655	1.32708	1.30201	1.3168	1.29262	1.31112	1.26642	1.33046	1.24108	1.24754
1.2879	1.40322	1.4214	1.36534	1.29856	1.23703	1.15945	1.23862	1.29653	1.16796	1.06247	0.970372	1.00058	1.05913	1.02754	1.06782	1.15382	1.07898	1.05854	1.02863	0.963008	1.05789	1.0751	1.03116	1.02773	1.07579	1.04085	1.07418	1.09487	1.09278	1.09913	1.07853	1.03183	1.06497	1.0246	1.05344	1.0549	1.12032	1.03378	1.0078	1.03739	1.07577	1.04443	1.06757	1.10551	1.24659	1.24186	1.2358	1.14533	1.18404
1.02168	0.982565	1.02864	1.11654	1.09551	0.977323	1.06583	1.01104	1.03356	1.06018	1.01947	0.955924	1.03347	0.959305	1.01382	1.00472	1.03748	1.11132	1.05346	1.14267	1.113	1.18613	1.24575	1.15494	1.09547	1.16697	1.14008	1.21426	1.23204	1.23588	1.26875	1.31237	1.2526	1.30882	1.37032	1.36784	1.40561	1.50456	1.46899	1.57449	1.44858	1.47103	1.49755	1.7049	1.70636	1.66014	1.5307	1.62543	1.48294	1.54627
1.02945	0.904093	0.799345	0.758097	0.747377	0.731787	0.912543	0.890729	0.822871	0.91577	0.999155	1.11414	1.09652	1.08703	1.12835	1.04777	0.999774	1.10302	1.15612	1.17032	1.27546	1.26991	1.21048	1.18984	1.11929	1.0863	1.08986	1.14015	1.11841	1.07581	1.0559	1.06548	1.08554	1.10734	1.13854	1.10018	1.08156	1.09691	1.04594	1.04886	1.06914	0.977633	0.99508	1.03457	0.97832	0.963488	0.937877	0.951371	1.07673	1.09324
1.59	1.41435	1.501	1.43769	1.43018	1.45593	1.41862	1.37237	1.38986	1.31331	1.3779	1.40181	1.39322	1.53123	1.4619	1.56768	1.61861	1.56846	1.51685	1.47816	1.45207	1.54725	1.61233	1.48982	1.52234	1.51548	1.5191	1.45085	1.5689	1.49214	1.57922	1.52709	1.73383	1.87334	1.8434	1.73899	1.85536	1.86956	1.77078	1.71	1.81744	1.85693	1.92797	1.88629	1.71799	1.75635	1.94931	1.8069	1.86872	1.87547
0.408148	0.426957	0.434006	0.422184	0.396148	0.415077	0.374113	0.378817	0.395662	0.383429	0.404293	0.379442	0.368663	0.363595	0.373957	0.325835	0.310206	0.327226	0.326498	0.308502	0.3171	0.339814	0.356185	0.360892	0.357178	0.385703	0.389395	0.367174	0.39577	0.3932	0.417231	0.387807	0.401874	0.414723	0.396999	0.398911	0.388167	0.399711	0.393722	0.425408	0.422076	0.395998	0.455072	0.442112	0.464144	0.45532	0.461434	0.515973	0.654756	1.07148
0.898046	0.90139	0.897486	0.906911	0.890379	0.822402	0.844027	0.801711	0.761863	0.768235	0.770651	0.818692	0.787373	0.799792	0.778493	0.798707	0.736906	0.758397	0.73813	0.72798	0.708876	0.704712	0.684748	0.650535	0.707441	0.653397	0.687725	0.725226	0.695778	0.688549	0.673559	0.694772	0.696463	0.714191	0.679804	0.650007	0.659604	0.620231	0.625821	0.607011	0.62184	0.611868	0.608658	0.58939	0.620774	0.580477	0.582131	0.595792	0.588362	0.590052
1.66782	1.58476	1.69886	1.59666	1.5233	1.55665	1.53796	1.41671	1.53847	1.56206	1.39831	1.48289	1.41111	1.43195	1.37577	1.34142	1.34234	1.45237	1.37099	1.36913	1.40824	1.2293	1.25874	1.24634	1.29619	1.17672	1.21666	1.17541	1.15801	1.14053	1.02895	1.0058	1.03041	1.08101	1.08095	1.12811	1.14822	1.08326	1.13074	1.17462	1.2232	1.24233	1.21405	1.17932	1.13603	1.12774	1.16555	1.13895	1.20166	1.27732
0.805001	0.821539	0.801346	0.740283	0.802773	0.755256	0.753679	0.757817	0.714836	0.71901	0.731658	0.699265	0.699497	0.721619	0.777192	0.683373	0.730861	0.74912	0.695716	0.742122	0.723063	0.793802	0.704665	0.796792	0.756091	0.772325	0.733932	0.739381	0.759963	0.742662	0.638938	0.683897	0.757565	0.756443	0.776281	0.804273	0.823145	0.847695	0.906602	0.796631	0.855399	0.838901	0.868043	0.85248	0.962617	0.950936	0.938069	0.944722	0.906617	0.943035
0.926675	0.903875	0.904197	0.902652	0.919677	0.904162	0.887149	0.888499	0.830033	0.846147	0.863392	0.851318	0.831073	0.834971	0.823722	0.765189	0.789748	0.806875	0.780352	0.795431	0.793157	0.803145	0.761743	0.777893	0.769123	0.735477	0.720022	0.731376	0.708632	0.699634	0.694741	0.677704	0.698158	0.763956	0.756338	0.736585	0.742056	0.732691	0.764889	0.760864	0.765539	0.736063	0.780253	0.777164	0.745043	0.729907	0.754856	0.776944	0.776763	0.77448
1.7167	1.60799	1.76749	1.70968	1.69139	1.50002	1.6308	1.47444	1.46031	1.47514	1.35003	1.20048	1.19294	1.17511	1.09219	1.11482	1.05474	1.11439	1.01229	0.980185	0.953211	0.914646	0.942362	0.891781	0.840067	0.829695	0.8036	0.833282	0.801116	0.778463	0.818032	0.792528	0.812269	0.853717	0.805008	0.837438	0.761793	0.761383	0.757442	0.767815	0.737739	0.722101	0.784594	0.756888	0.796593	0.820233	0.768158	0.72999	0.707912	0.693192
1.19172	1.18453	1.16892	1.14243	1.23714	1.24007	1.26247	1.25615	1.28086	1.32359	1.26498	1.25843	1.2128	1.17093	1.25117	1.28838	1.2695	1.21182	1.16763	1.24562	1.22593	1.10179	1.02129	1.03339	1.08696	1.08509	1.06228	1.0425	1.04609	1.05925	1.03643	1.13372	1.06273	1.13281	1.14154	1.11844	1.17973	1.11806	1.10175	1.06049	1.14689	1.11653	1.12557	1.05068	1.05912	1.07355	1.04428	1.09595	1.08687	1.07967
2.8305	2.5518	2.53987	2.46154	2.21796	2.64925	2.45705	2.43246	2.43337	2.55991	2.38234	2.27942	2.19089	2.08425	2.04683	1.98957	1.97444	1.8961	1.77313	1.67687	1.66461	1.64205	1.57315	1.48354	1.41113	1.36932	1.38941	1.35038	1.44509	1.45271	1.36872	1.3447	1.45298	1.38524	1.41808	1.49178	1.4588	1.46899	1.47115	1.58695	1.43014	1.32621	1.24139	1.30041	1.21391	1.23517	1.32713	1.33133	1.31274	1.25693
1.11721	1.04575	0.999864	1.02898	1.04562	0.992769	0.986215	0.972295	0.951523	0.964404	0.897908	0.970842	0.890579	0.905675	0.969442	1.01258	0.979661	1.10653	0.993469	1.02355	0.976273	0.964511	0.964741	0.881806	0.942824	0.870211	0.894038	0.898211	0.843495	0.830768	0.812672	0.838855	0.805327	0.845826	0.827475	0.854101	0.855977	0.867083	0.845443	0.878294	0.906793	0.872367	0.949573	0.859752	0.865274	0.877437	0.895752	0.886641	0.907095	0.919381
0.94898	0.89463	0.882793	0.868684	0.865836	0.816575	0.787369	0.821886	0.786645	0.762763	0.77991	0.761401	0.763871	0.746368	0.688292	0.70398	0.676806	0.688516	0.659123	0.67198	0.652491	0.671384	0.672857	0.695819	0.713246	0.693167	0.688642	0.685842	0.697934	0.726658	0.721733	0.722272	0.742823	0.756206	0.780972	0.715982	0.779067	0.794281	0.78305	0.806152	0.748973	0.811307	0.810865	0.798394	0.819219	0.892784	0.900875	0.902581	0.909577	0.853395
0.443333	0.714431	0.757839	0.912461	0.963089	1.00234	1.03028	0.913019	1.01359	0.949955	0.936244	0.942332	0.973213	1.07759	1.17946	1.03378	0.990375	1.02108	0.99665	0.977252	1.01747	1.07102	0.988849	1.032	1.00043	0.97884	1.09852	1.00142	0.997386	1.03692	1.06599	1.10251	1.17394	1.28256	1.32866	1.20461	1.25605	1.26286	1.20524	1.1325	1.05767	1.1211	1.18977	1.21308	1.16337	1.12675	1.19161	1.18577	1.17234	1.08235
1.35799	1.13016	0.881864	0.817074	0.827312	0.735863	0.756776	0.766856	0.752514	0.989919	0.9122	0.980552	1.03748	1.00828	1.13173	1.30228	1.21977	1.34691	1.39861	1.40526	1.54248	1.47047	1.44615	1.53381	1.44078	1.31011	1.36693	1.44984	1.55447	1.52246	1.78042	1.95658	1.20029	1.2975	0.968819	1.08592	1.07652	1.24566	1.22912	1.32647	1.41508	1.21218	1.30375	1.15391	1.22545	1.1559	1.1066	0.973971	0.921997	0.749779
0.912146	0.903577	0.917383	0.979713	1.00634	1.00851	1.03837	1.08059	1.01647	1.01161	1.01952	1.08236	1.04962	1.07413	1.06092	1.10147	1.13057	1.11432	1.09791	1.16051	1.10858	1.07414	1.13465	1.13967	1.12941	1.08788	1.11239	1.05216	1.06467	1.14143	1.21381	1.28707	1.26209	1.23972	1.22006	1.17475	1.17122	1.13375	1.16379	1.17105	1.14901	1.14018	1.17221	1.15212	1.12418	1.12301	1.1459	1.09306	1.06926	1.14912
0.859878	0.837826	0.868082	0.868486	0.8719	0.929561	0.896504	0.859077	0.848255	0.903661	0.811997	0.851943	0.829832	0.82784	0.850134	0.789058	0.756791	0.785632	0.813319	0.838816	0.771533	0.74822	0.749931	0.773821	0.771616	0.821629	0.777426	0.802661	0.765086	0.771087	0.74999	0.738261	0.71583	0.715495	0.715308	0.711865	0.721911	0.734487	0.728227	0.713013	0.740713	0.735631	0.756091	0.780222	0.77629	0.777703	0.719664	0.742204	0.729236	0.790216
2.07014	1.99012	2.22272	2.30248	1.91429	1.95661	1.90542	1.79622	1.85046	1.72291	1.6091	1.56031	1.63991	1.66184	1.66927	1.74092	1.71456	1.71828	1.60175	1.71206	1.78448	1.77001	1.69832	1.55264	1.67321	1.52255	1.50828	1.54917	1.57765	1.63748	1.56394	1.54414	1.30149	1.49495	1.4807	1.41639	1.3625	1.49627	1.50461	1.5283	1.63886	1.47409	1.45511	1.44068	1.64955	1.54326	1.48773	1.43131	1.36826	1.45018
1.08849	0.986373	1.0088	0.92419	0.985914	1.01159	1.02061	1.02246	1.02118	1.05614	0.987956	1.02359	0.958735	0.932601	0.890544	0.869932	0.910788	0.905615	0.867302	0.880171	0.88986	0.862212	0.849834	0.800972	0.823304	0.745793	0.790096	0.737147	0.773967	0.69457	0.693409	0.682953	0.72987	0.743962	0.717081	0.687556	0.688494	0.717315	0.701582	0.70622	0.743911	0.779109	0.719431	0.73518	0.738525	0.744496	0.723861	0.760042	0.78212	0.747922
1.25422	1.27848	1.28481	1.31644	1.24011	1.12096	1.15704	1.11811	1.10825	1.08428	1.05891	1.04386	1.07779	1.03563	1.01165	0.945447	0.894003	0.855415	0.81571	0.781523	0.794533	0.744565	0.793517	0.793843	0.859934	0.852864	0.757142	0.740099	0.723595	0.743213	0.759105	0.755238	0.797693	0.868246	0.840913	0.922434	0.963987	0.864003	0.927026	0.976171	0.950784	0.981276	0.917168	0.885834	0.839232	0.793128	0.769773	0.736412	0.676361	0.683205
1.17773	1.24994	1.27566	1.21715	1.24464	1.22017	1.23178	1.17031	1.20855	1.24474	1.30111	1.4097	1.24785	1.26271	1.2085	1.15217	1.20981	1.16976	1.18434	1.18693	1.18432	1.17239	1.14112	1.14943	1.14438	1.14654	1.11917	1.18881	1.12609	1.18628	1.13733	1.1043	1.12321	1.15066	1.12094	1.10773	1.0793	1.11541	1.139	1.08976	1.07926	1.1046	1.0815	1.03875	1.08009	1.11986	1.19111	1.18515	1.23399	1.22967
1.75878	1.66017	1.68829	1.63559	1.6322	1.59338	1.58194	1.53285	1.49817	1.42781	1.39661	1.3462	1.38286	1.41255	1.4408	1.45784	1.42767	1.4194	1.44632	1.37608	1.32688	1.35686	1.32185	1.25687	1.26008	1.25196	1.2807	1.29579	1.3117	1.33373	1.36875	1.40348	1.47446	1.42803	1.32821	1.39989	1.45326	1.6293	1.61169	1.61931	1.70008	1.64526	1.73992	1.73781	1.73588	1.78414	1.87335	1.91792	1.9644	1.99058
0.88122	0.836862	0.845914	0.914876	0.907034	0.972125	0.925148	0.888274	0.901195	0.922254	0.905218	0.960951	0.894946	0.938062	0.975326	0.979514	0.961748	0.930225	0.935317	0.939348	0.869719	0.966204	0.979104	0.94651	1.03519	1.01084	1.0288	1.07021	0.997426	1.04354	0.991767	0.999692	1.03512	1.17435	1.09767	1.18466	1.0975	1.08207	1.08743	1.06648	1.04467	1.00671	0.826987	0.670085	0.606584	0.692177	0.71063	0.669025	0.69922	0.642469
0.693287	0.691961	0.680972	0.688185	0.653573	0.694831	0.68165	0.661501	0.671416	0.671708	0.655323	0.628663	0.623006	0.642958	0.674768	0.65368	0.643364	0.662254	0.597946	0.572217	0.587475	0.58767	0.625	0.609154	0.60458	0.591644	0.568199	0.578304	0.56833	0.591316	0.571893	0.539647	0.579527	0.637624	0.621913	0.60357	0.567683	0.606503	0.615127	0.632202	0.642119	0.63874	0.674276	0.785246	0.698804	0.656063	0.672664	0.678758	0.65405	0.637228
1.21675	1.26034	1.3115	1.23771	1.31563	1.27035	1.30823	1.21426	1.31153	1.2674	1.19828	1.10648	1.16837	1.16017	1.11071	1.21984	1.20282	1.22007	1.08156	1.12504	1.15482	1.09325	1.10886	1.0782	1.02876	1.05719	1.06186	1.06248	1.05957	1.04797	1.02401	1.04236	1.08268	1.05395	1.06388	1.11171	1.06413	1.07081	1.11324	1.15691	1.15384	1.16171	1.21853	1.20461	1.16646	1.26573	1.24795	1.24142	1.28106	1.32571
1.76742	1.61391	1.85496	1.88364	1.75908	1.83073	1.84683	1.8502	1.7875	1.79808	1.72166	1.68577	1.62857	1.62313	1.5091	1.47665	1.52752	1.53509	1.4192	1.47084	1.49733	1.45166	1.43255	1.37788	1.42242	1.38304	1.37253	1.38516	1.48707	1.41581	1.33252	1.42874	1.3384	1.30518	1.40737	1.40365	1.36911	1.44917	1.47774	1.43439	1.52467	1.44671	1.51074	1.57576	1.54559	1.63459	1.58847	1.66466	1.5778	1.6841
1.2602	1.2741	1.30048	1.26601	1.28306	1.31922	1.27433	1.25095	1.25956	1.33629	1.32133	1.39595	1.42025	1.29536	1.27851	1.19798	1.1814	1.20844	1.27872	1.11869	1.11391	1.13572	1.12903	1.02381	1.04095	1.01245	1.00267	0.991973	0.987098	1.00734	0.982709	0.962352	0.952796	0.987308	0.880798	0.944499	0.907995	0.873816	0.903675	0.891559	0.847856	0.84295	0.872233	0.835941	0.825572	0.829275	0.789714	0.802815	0.780658	0.819322
1.88007	1.64007	1.81913	1.85852	1.85514	1.73784	1.91073	1.75356	1.80212	1.81641	1.8109	1.70242	1.578	1.65851	1.54626	1.61312	1.60807	1.83097	1.7207	1.60736	1.72806	1.94584	1.83124	1.77928	1.7599	1.7472	1.65158	1.67095	1.62258	1.83174	1.59694	1.58179	1.56352	1.61826	1.54462	1.67024	1.64619	1.58253	1.63047	1.53675	1.55712	1.48123	1.50316	1.45216	1.44352	1.40121	1.41145	1.34316	1.30227	1.30777
0.810873	0.820544	0.856054	0.802838	0.810206	0.753862	0.778142	0.766951	0.826329	0.801253	0.77921	0.794323	0.875275	0.818626	0.790943	0.772497	0.825697	0.856266	0.806825	0.853909	0.790173	0.810457	0.841403	0.819559	0.837711	0.862535	0.828885	0.825494	0.825643	0.810526	0.793222	0.782642	0.812735	0.838254	0.873335	0.823563	0.901788	0.920675	0.891385	0.927121	0.902732	0.925963	0.986639	0.923982	0.964905	0.918057	0.954819	0.90107	0.960439	0.933203
0.649803	0.686514	0.684946	0.68046	0.677914	0.696096	0.674368	0.674804	0.665499	0.666946	0.685992	0.720367	0.720493	0.74107	0.727641	0.696948	0.720291	0.730529	0.714849	0.734395	0.754821	0.739718	0.732197	0.736786	0.739454	0.722721	0.674888	0.667396	0.673964	0.630606	0.643049	0.670278	0.666396	0.672262	0.67871	0.668336	0.65436	0.703276	0.673467	0.694302	0.691753	0.674061	0.671075	0.703801	0.709691	0.701136	0.659784	0.612882	0.593173	0.555602
1.76169	1.80913	1.75725	1.65048	1.58303	1.56468	1.46498	1.4258	1.43968	1.4387	1.51603	1.47548	1.52574	1.60859	1.67356	1.69119	1.50074	1.56826	1.51982	1.43787	1.40787	1.35159	1.42651	1.33211	1.33845	1.29578	1.31542	1.31707	1.23629	1.12874	1.2588	1.17287	1.15454	1.20196	1.23936	1.36034	1.3159	1.29252	1.18534	1.17501	1.21398	1.1626	1.21961	1.15988	1.2368	1.16282	1.17523	1.14347	1.17166	1.19894
0.74569	0.76392	0.778788	0.798515	0.918483	0.854884	0.863912	0.862917	0.896839	0.819624	0.811871	0.833097	0.848742	0.838022	0.910349	0.900512	0.873458	0.874331	0.876668	0.885939	0.859697	0.839984	0.867754	0.849581	0.836536	0.857298	0.83087	0.849059	0.814513	0.863374	0.867573	0.852032	0.830613	0.882408	0.900033	0.906916	0.91433	0.900023	0.942439	0.931088	0.976328	0.94628	0.929878	0.95178	1.04671	1.1002	1.09889	1.21367	1.17346	1.28869
0.916022	0.919518	0.923359	0.967498	0.931227	0.905688	0.937877	0.865278	0.862125	0.831181	0.831777	0.87437	0.836174	0.810481	0.802407	0.746951	0.705505	0.687579	0.706109	0.653605	0.629285	0.634786	0.627263	0.643254	0.665557	0.636684	0.655602	0.674665	0.640845	0.632688	0.623008	0.640505	0.639434	0.627898	0.617504	0.632882	0.619097	0.618482	0.627374	0.646578	0.600571	0.618642	0.598667	0.630072	0.589754	0.607638	0.635426	0.627095	0.638963	0.639979
0.719437	0.710174	0.653817	0.676046	0.662721	0.666025	0.682343	0.692695	0.680027	0.69995	0.679353	0.676773	0.644832	0.644677	0.634513	0.644771	0.620607	0.588425	0.573541	0.572302	0.59141	0.593884	0.616901	0.596483	0.55989	0.581385	0.550296	0.5142	0.549263	0.539263	0.544059	0.508738	0.496736	0.489012	0.508235	0.509272	0.545045	0.550702	0.556844	0.578924	0.561535	0.561406	0.521914	0.52601	0.545429	0.53258	0.515707	0.552953	0.539617	0.553365
0.962766	0.939991	0.926946	0.956678	0.913943	0.965705	0.983846	0.990405	1.00104	1.02719	0.990936	1.03045	1.05703	1.06687	1.09834	1.06926	1.01284	1.03173	1.01678	1.04449	1.06358	1.0908	1.08637	1.05093	1.05478	1.01917	1.01167	1.0346	1.07448	1.10483	1.03628	1.04218	1.07718	1.08153	1.06605	1.06697	1.1128	1.03267	1.1183	1.14802	1.19423	1.25698	1.222	1.24651	1.33712	1.30385	1.3715	1.33139	1.30753	1.35972
1.25249	1.23567	1.2192	1.30751	1.25383	1.27205	1.16271	1.19403	1.1952	1.10428	1.18033	1.21001	1.16528	1.23329	1.11808	1.1358	1.14855	1.16464	1.21861	1.13006	1.14544	1.13945	1.18784	1.11861	1.04763	0.996818	1.06593	1.2272	1.15114	1.16473	1.2019	1.2333	1.25883	1.51064	1.51708	1.43275	1.29719	1.331	1.3609	1.38917	1.43076	1.47654	1.40586	1.48891	1.53432	1.55146	1.6134	1.61035	1.51456	1.64105
1.08473	1.05912	1.12141	1.08653	1.1903	1.13946	1.13918	1.14238	1.08322	1.01063	1.14892	1.09141	1.02428	1.03645	1.11385	1.09664	1.08682	1.14168	1.13414	1.13312	1.17044	1.17422	1.1526	1.22171	1.21355	1.16697	1.25104	1.22196	1.24743	1.21697	1.31834	1.28882	1.28562	1.4098	1.37691	1.29883	1.19256	1.15598	1.10709	1.17492	1.15946	1.07535	1.09898	1.14057	1.15708	1.1594	1.08727	1.16317	1.25082	1.37977
0.929589	0.900922	0.847139	0.876153	0.791243	0.784807	0.766755	0.75159	0.730106	0.720543	0.73178	0.759089	0.723069	0.703646	0.721438	0.717784	0.715539	0.699105	0.652652	0.619572	0.556968	0.561897	0.586788	0.599801	0.604873	0.601203	0.61167	0.577174	0.555842	0.529554	0.544159	0.549225	0.549717	0.599785	0.606596	0.641609	0.632803	0.591876	0.591911	0.577078	0.592382	0.642465	0.677435	0.682522	0.749453	0.786135	0.795281	0.74318	0.906354	0.916223
0.857255	0.834859	0.792274	0.846757	0.804615	0.86207	0.959109	1.00932	0.454785	0.583554	0.905694	0.642925	0.608543	0.805641	0.545358	0.445737	0.447844	0.420724	0.409527	0.414338	0.410125	0.524075	0.528543	0.569649	0.615162	0.653589	0.797327	0.739091	0.714194	0.746011	0.78394	0.812702	0.854004	0.8326	0.949975	0.917975	0.887209	0.680224	0.750776	0.894044	1.10055	1.4205	1.44057	1.39874	2.00751	1.96267	1.60712	1.36443	1.2552	1.12638
0.805819	0.819385	0.844452	0.82286	0.830666	0.806734	0.800215	0.718956	0.727903	0.683264	0.674374	0.719124	0.699572	0.698605	0.832507	0.841908	0.825683	0.814184	0.749765	0.789386	0.766925	0.731059	0.805479	0.801273	0.825394	0.825507	0.843831	0.835281	0.821813	0.819755	0.799103	0.741778	0.843254	0.895403	0.873704	0.80712	0.828671	0.916462	0.918631	0.861242	0.844023	0.898805	0.944767	0.955187	0.879477	0.839712	0.893337	0.906068	1.01225	1.03858
0.879425	0.878946	0.82166	0.86662	0.788151	0.790808	0.788954	0.828717	0.884364	0.858588	0.867593	0.906916	0.916413	0.8451	0.932939	0.918299	0.969062	1.00239	1.02024	1.12942	1.05222	1.0411	1.00247	0.983279	1.15976	1.20393	1.17057	1.22225	1.1065	1.00335	0.828104	0.951571	1.16921	1.21185	1.15909	0.932936	1.02744	1.10129	1.08823	1.00864	1.10755	1.01115	1.07867	1.27467	1.17267	1.07225	1.07721	1.16975	1.12692	1.31844
0.879032	0.888173	0.899276	0.894803	0.878654	0.890858	0.958143	0.91332	0.894449	0.885454	0.881235	0.866249	0.866507	0.863243	0.850758	0.821612	0.862834	0.816994	0.82092	0.869134	0.833707	0.821088	0.826055	0.816517	0.820778	0.846266	0.845283	0.840158	0.8445	0.860646	0.805489	0.756946	0.839261	0.808084	0.788803	0.791163	0.797304	0.832326	0.791205	0.792442	0.780356	0.809714	0.795461	0.792035	0.823934	0.843207	0.817929	0.833271	0.76422	0.840522
0.910926	0.882113	0.910084	0.931807	0.853964	0.887002	0.876974	0.859934	0.792037	0.766471	0.704854	0.662528	0.629002	0.604481	0.587994	0.571773	0.569552	0.56587	0.544031	0.564024	0.587817	0.589196	0.593959	0.556719	0.553371	0.55171	0.510163	0.525529	0.501421	0.531926	0.52548	0.522628	0.558549	0.53739	0.522144	0.556035	0.508161	0.495515	0.49617	0.498013	0.52337	0.521833	0.496792	0.507585	0.502381	0.521692	0.527914	0.527586	0.551681	0.521934
0.926793	0.871115	0.810742	0.877307	0.9718	0.956807	0.911737	0.941321	0.9667	1.02523	1.10024	1.05849	0.961722	0.978875	0.97723	0.976529	0.85294	0.815162	0.778108	0.807967	0.820032	0.80513	0.747028	0.70869	0.748827	0.722109	0.747614	0.738042	0.788871	0.750094	0.787091	0.711825	0.82486	0.867032	0.818308	0.804835	0.79391	0.806492	0.763423	0.77102	0.76997	0.722642	0.803586	0.770706	0.806517	0.784811	0.809463	0.897713	0.846592	0.813296
1.42136	1.14212	0.94406	0.972021	1.48635	0.935603	1.31939	1.3888	1.39362	1.48247	1.53588	1.58669	1.69067	1.90969	2.09443	1.55523	1.88147	1.84266	1.40365	1.5214	1.07898	1.36772	1.07982	1.21564	1.2101	1.57527	1.11915	1.05902	1.49042	1.38902	1.1961	1.39308	1.14578	1.24697	1.29702	1.08048	1.07544	0.878482	0.988309	1.10218	1.17834	1.23124	0.955697	1.24826	1.29519	1.32092	1.55488	1.45498	1.4914	1.52394
1.16925	1.14199	1.15872	1.19802	1.13289	1.15732	1.15607	1.10939	1.09049	1.05028	1.11842	1.20882	1.20203	1.09741	1.18689	1.17775	1.31154	1.25086	1.20908	1.1455	1.12857	1.22351	1.38772	1.31238	1.29899	1.20394	1.2301	1.16746	1.19043	1.17263	1.16989	1.20612	1.19841	1.22874	1.24693	1.23631	1.26872	1.27258	1.30367	1.17538	1.23583	1.36808	1.46126	1.50967	1.50026	1.33892	1.34288	1.44167	1.5012	1.49276
0.743088	0.777537	0.735428	0.712873	0.74329	0.771466	0.764978	0.768459	0.726431	0.683375	0.699668	0.707712	0.68343	0.750103	0.72876	0.733877	0.743784	0.734061	0.761666	0.653348	0.615024	0.622914	0.702213	0.750691	0.754441	0.760169	0.752193	0.801717	0.776371	0.772134	0.751871	0.737187	0.718992	0.77522	0.766101	0.732972	0.675126	0.637325	0.644353	0.623624	0.667729	0.682504	0.750725	0.699199	0.66994	0.682766	0.67951	0.709117	0.727662	0.680454
2.18662	1.67299	2.1074	1.95668	1.80707	1.65135	1.92087	1.84598	1.99819	1.82436	1.84245	2.03787	2.03082	1.87499	1.93829	1.9152	1.71812	1.7833	1.69913	1.66613	1.78531	1.72469	1.81006	1.66821	1.61078	1.5722	1.71457	1.82517	1.96275	1.7982	1.76077	1.79254	1.72736	1.5696	1.48722	1.77066	1.84079	2.05347	1.85346	1.85788	1.92834	1.7716	1.81247	1.73296	1.5268	1.65228	1.61676	1.69192	1.66854	1.79495
1.1561	1.10605	1.09858	0.966235	1.0275	1.00097	1.01199	0.94671	0.963854	1.03738	0.881506	0.998656	0.970997	0.975502	0.968579	1.01709	1.04212	1.08906	1.01372	0.989639	0.950242	1.08247	0.916449	0.980344	0.993224	0.992744	1.00148	1.03001	0.990451	0.963303	0.911999	0.895608	0.901611	0.929532	0.875111	0.829654	0.834803	0.799916	0.845089	0.774634	0.749714	0.772782	0.777202	0.749349	0.857798	0.903314	0.908316	0.993523	1.04266	1.07883
1.78631	1.76702	1.80264	1.83456	1.7898	1.86106	1.77083	1.69441	1.51809	1.53143	1.40068	1.28374	1.23936	1.22527	1.22034	1.24384	1.13175	1.14136	1.129	1.05973	1.00744	1.02596	0.985182	0.955573	0.962204	0.984055	1.07421	1.09918	1.05391	1.02633	1.01027	0.993808	0.959518	0.979298	0.962078	0.949982	0.994606	0.96841	0.91612	0.951301	0.915735	0.902801	0.85932	0.901422	0.924637	0.96231	0.919602	0.897087	0.895339	0.866471
0.839773	0.802655	0.824623	0.787916	0.793706	0.7809	0.770414	0.780167	0.768912	0.776119	0.757307	0.729107	0.73276	0.719613	0.714677	0.687112	0.704713	0.68536	0.65834	0.67378	0.666197	0.642686	0.655944	0.653749	0.630419	0.624752	0.60928	0.59215	0.592652	0.579914	0.575077	0.551835	0.563788	0.574701	0.542832	0.552576	0.525946	0.531641	0.518499	0.511425	0.495785	0.512579	0.484411	0.488457	0.492477	0.488361	0.486954	0.480442	0.473563	0.487387
0.79703	0.809609	0.772871	0.771278	0.674623	0.841284	0.972266	1.09133	1.13911	1.12111	1.07341	1.0687	1.04834	1.10952	1.01249	0.930918	0.817339	0.848417	0.858247	0.949924	0.979129	0.683482	0.897845	0.944793	0.93574	1.08216	1.02052	0.902552	0.883096	0.899404	0.887492	0.860069	0.847692	0.809556	0.896553	0.919065	1.05076	1.0944	1.00894	0.962523	0.930575	0.978073	0.962701	0.973082	1.06688	1.03903	1.05183	1.017	1.00644	0.965503
1.45911	1.4943	1.54615	1.53352	1.39739	1.50345	1.30805	1.4188	1.42388	1.39258	1.42043	1.36598	1.39424	1.29674	1.24511	1.15344	1.11897	1.1808	1.13465	1.18037	1.14548	1.05704	1.02604	1.03027	1.06475	1.01279	1.04455	0.909207	0.908827	0.951394	0.911516	0.90922	0.930377	0.950889	1.01461	0.974418	0.945812	0.962957	1.05417	1.04368	1.03618	0.997906	0.881944	0.975891	0.999055	0.992201	0.963579	0.992345	1.09867	1.19546
1.26003	1.33005	1.30466	1.234	1.21494	1.12917	1.1317	1.14213	1.12598	1.06549	1.07323	1.07827	1.09644	1.027	1.10344	1.05135	1.09078	1.11183	1.10507	1.12724	1.1271	1.06755	1.12252	1.16221	1.16202	1.14107	1.17154	1.12619	1.15101	1.18026	1.14449	1.17765	1.11156	1.18697	1.13329	1.03814	1.00494	1.18467	1.0649	1.04493	1.11439	1.1117	1.13153	1.12388	1.09888	1.12905	1.10377	1.02261	1.06258	1.06187
1.04816	1.0799	1.04608	0.984207	0.957144	0.923455	0.909531	0.903305	0.982688	0.90631	0.894667	0.909942	0.867207	0.88152	0.900805	0.874364	0.860039	0.856803	0.811148	0.866284	0.807687	0.82317	0.825956	0.796368	0.816909	0.773998	0.740003	0.749164	0.781617	0.750331	0.746214	0.742873	0.757715	0.771889	0.750352	0.752869	0.730782	0.765657	0.768183	0.761988	0.782565	0.791104	0.875669	0.817369	0.793925	0.839204	0.796621	0.756647	0.719643	0.722853
1.12653	1.0638	1.11211	1.12423	1.15182	1.14831	1.14254	1.06863	1.12359	1.07675	1.04551	1.08427	1.08043	1.0333	1.04867	1.09363	1.04366	1.08209	1.13345	1.08555	1.12712	1.12117	1.11852	1.05055	1.04079	1.12762	1.0064	1.03822	1.08124	1.03303	0.98306	0.96067	1.03682	1.09217	1.13584	1.13268	1.12798	1.18557	1.13711	1.31462	1.23111	1.22392	1.28937	1.21705	1.16824	1.18794	1.18228	1.21434	1.22809	1.19716
0.466641	0.571491	0.779083	0.912403	1.01912	1.09149	1.1625	1.17799	0.977111	0.934653	0.733278	0.742179	0.828814	0.781628	0.872891	0.976127	0.866208	1.00413	1.07443	1.10617	1.14605	1.11644	1.24208	1.20016	1.25055	1.22672	1.1754	1.17515	1.28016	1.30076	1.24653	1.34753	1.2523	1.25758	1.26551	1.43682	1.40454	1.36956	1.34137	1.24528	1.33625	1.36332	1.38514	1.41407	1.44441	1.5555	1.51861	1.38922	1.38872	1.32328
1.21807	1.20577	1.16036	1.10292	1.05885	1.10434	1.07241	1.09899	1.11887	1.06322	0.997264	0.98143	1.0085	0.954181	0.920438	0.926588	0.93275	0.935331	0.909117	0.919045	0.978225	0.987086	0.991519	0.966327	0.960503	0.94997	0.980257	0.927351	0.932045	0.939338	0.906863	0.875341	0.930561	0.926518	0.956285	1.0142	0.969408	0.998354	0.986518	0.899286	0.904458	0.866516	0.868656	0.872715	0.892316	0.912732	0.871341	0.899517	0.912763	0.898859
0.777301	0.734446	0.774109	0.764432	0.778509	0.772804	0.755027	0.733363	0.719249	0.732485	0.719179	0.691727	0.696747	0.691193	0.666438	0.642421	0.618623	0.621106	0.627701	0.60641	0.562961	0.574026	0.605811	0.578654	0.582818	0.623019	0.588996	0.585189	0.582975	0.55579	0.549941	0.553181	0.521133	0.545258	0.526893	0.540978	0.56227	0.548696	0.547555	0.533077	0.517032	0.547993	0.560799	0.589247	0.601146	0.62495	0.61319	0.632341	0.632447	0.655189
1.34826	1.31604	1.34968	1.36303	1.34841	1.41521	1.45803	1.45424	1.47991	1.50506	1.40652	1.34715	1.32584	1.3648	1.24727	1.31137	1.31721	1.30448	1.22724	1.31811	1.29083	1.26355	1.21226	1.19094	1.23948	1.19037	1.20447	1.22086	1.21592	1.18107	1.15295	1.13357	1.1637	1.17234	1.06812	1.10344	1.05884	1.14066	1.02923	0.996718	0.991896	0.974819	1.00521	0.922372	0.944626	0.928874	0.958922	0.93956	0.890156	0.954746
0.756671	0.75539	0.774278	0.778824	0.734962	0.745531	0.746243	0.707765	0.687832	0.687323	0.659144	0.65433	0.663274	0.672657	0.639178	0.668938	0.655741	0.687545	0.631399	0.616254	0.647652	0.668945	0.6706	0.651318	0.715343	0.69506	0.724556	0.690018	0.671221	0.652425	0.644623	0.636822	0.62902	0.611796	0.642919	0.638625	0.657123	0.642047	0.66369	0.644284	0.598496	0.633469	0.648277	0.625297	0.598111	0.589544	0.553314	0.537587	0.590614	0.616392
1.25415	1.23999	1.15997	1.15525	1.10865	1.00523	0.977108	0.930213	0.916431	0.8688	0.814562	0.779792	0.800493	0.77302	0.776834	0.745875	0.744309	0.734583	0.775641	0.778026	0.762283	0.757632	0.739844	0.739888	0.704657	0.728417	0.707741	0.717867	0.741067	0.698682	0.720404	0.694826	0.705518	0.719114	0.695701	0.689737	0.703508	0.685152	0.716504	0.719727	0.715559	0.739291	0.72588	0.744062	0.75485	0.752879	0.747697	0.756564	0.789705	0.821359
0.792968	0.787052	0.802467	0.767293	0.721493	0.720883	0.728566	0.712921	0.651111	0.676091	0.67822	0.6528	0.634622	0.622978	0.614431	0.601508	0.593272	0.596156	0.595882	0.589453	0.57689	0.589705	0.627277	0.591565	0.608311	0.582499	0.547308	0.52734	0.513809	0.529196	0.542428	0.498573	0.520139	0.485534	0.478439	0.47648	0.501024	0.488151	0.495774	0.515805	0.500901	0.510842	0.528539	0.520865	0.537947	0.503388	0.510444	0.510323	0.541436	0.518828
0.609772	0.652772	0.951726	1.05248	0.97591	0.987988	0.936662	0.95337	0.883708	0.894192	0.98435	0.957072	0.974515	1.00593	0.97607	0.983226	0.9907	0.957597	0.986492	0.934085	0.97187	0.886846	0.955772	0.936315	0.895961	0.914094	0.887685	0.879336	0.913436	0.898789	0.868197	0.886065	0.951916	0.90773	0.928103	0.96149	0.934421	0.905441	0.929952	0.905391	0.8741	0.922735	0.950166	0.982474	0.970831	0.992068	1.03027	0.995045	0.996159	0.995028
0.417525	0.335362	0.294225	0.310995	0.412598	0.516117	0.505628	0.466332	0.501129	0.478924	0.47606	0.459479	0.429384	0.469865	0.412056	0.387713	0.457884	0.471628	0.434436	0.493927	0.469518	0.452432	0.439922	0.744601	0.860444	0.917684	1.18815	1.04849	1.1076	1.04484	0.960908	0.899742	0.880834	0.940326	1.02066	0.889901	0.806269	0.817011	0.91905	0.925202	0.916982	1.03872	1.07887	1.28388	1.40972	1.59454	1.48425	1.3989	1.30078	1.25526
0.696579	0.655707	0.682466	0.708877	0.708837	0.717656	0.695942	0.645789	0.662141	0.743987	0.747243	0.645145	0.633333	0.59934	0.601904	0.672072	0.62583	0.664192	0.959484	0.836502	0.72612	0.649804	0.745816	0.841827	0.937839	1.04506	1.20115	1.24104	1.16289	1.11719	1.45313	1.36766	1.17995	1.57054	1.92492	1.52285	1.42307	1.48953	1.57171	1.31282	1.06852	1.05727	1.26951	1.44948	1.2689	1.48254	1.65891	1.85419	1.70085	1.51181
1.01158	0.951269	0.913351	0.915122	0.996159	1.06626	1.13692	1.07231	1.01524	1.01635	0.970257	1.03822	1.03933	1.04403	1.0399	1.04195	1.07823	1.04451	0.984166	1.12693	1.07276	1.02746	1.03751	1.01407	1.05335	1.01961	1.00604	0.975498	0.966478	0.983617	0.990536	1.05991	1.13988	1.04626	1.0969	1.06038	0.981745	0.969892	0.968971	0.988646	1.16501	1.08589	1.11729	1.14884	1.15612	1.2591	1.13398	1.10077	1.26311	1.18622
1.18903	1.05517	1.33462	1.2987	1.2149	1.16978	1.22154	1.17028	1.26421	1.15158	1.16074	1.01422	1.19752	1.09677	1.06744	1.21985	1.30291	1.3303	1.37837	1.5776	1.14015	1.31614	1.22852	1.28566	1.24553	1.32624	1.29829	1.1259	1.06477	1.13618	1.06569	1.25492	1.39296	1.50619	1.3414	1.22802	1.13393	1.31554	1.57471	1.72252	1.51397	0.861005	1.06165	1.08826	1.3399	1.26953	1.47882	1.17817	1.37736	1.13862
0.953897	0.927445	0.890208	0.908446	0.867297	0.851222	0.826702	0.825935	0.819957	0.768861	0.753254	0.729457	0.715329	0.713883	0.69768	0.670302	0.671394	0.671268	0.628242	0.626904	0.594668	0.61055	0.612522	0.611955	0.632117	0.627128	0.63118	0.613642	0.610343	0.598785	0.61357	0.581379	0.562077	0.596132	0.604263	0.589999	0.602046	0.609482	0.604761	0.601744	0.597697	0.597096	0.610778	0.57831	0.583246	0.575765	0.585766	0.57939	0.591758	0.59183
0.814054	0.803424	0.813506	0.791731	0.801071	0.856049	0.874435	0.892974	0.877955	0.908936	0.841351	0.833355	0.860676	0.883292	0.884978	0.90174	0.880361	0.86281	0.869393	0.87058	0.871415	0.909406	0.916168	0.916874	0.925376	0.898745	0.883833	0.876878	0.916619	0.85273	0.880509	0.824587	0.828714	0.852238	0.790318	0.860338	0.847348	0.832272	0.83935	0.838378	0.810063	0.822557	0.83051	0.835476	0.8324	0.873533	0.865975	0.879689	0.861743	0.854315
0.834155	0.803892	0.809302	0.8168	0.783015	0.80244	0.777372	0.748408	0.738333	0.747252	0.751701	0.755259	0.737432	0.774986	0.758619	0.771241	0.79672	0.774561	0.803626	0.808949	0.800997	0.814938	0.814084	0.779578	0.799983	0.783788	0.789383	0.759844	0.753017	0.750132	0.738291	0.733555	0.742645	0.766535	0.753136	0.779844	0.7742	0.778706	0.796131	0.821155	0.816942	0.766807	0.778358	0.780682	0.789556	0.789856	0.829192	0.855243	0.81398	0.803972
0.594324	0.631925	0.673208	0.628479	0.557826	0.601044	0.648263	0.638082	0.608935	0.612537	0.589081	0.544155	0.60292	0.656181	0.686544	0.541568	0.450788	0.488197	0.519439	0.578235	0.63703	0.695826	0.787847	0.845335	0.813965	0.81359	0.717571	0.73088	0.735828	0.765492	0.778834	0.741115	0.892006	0.946604	0.841802	0.818654	0.887038	1.0052	1.21887	1.09531	1.29495	1.12667	1.08881	1.23961	1.18883	0.951256	0.942819	0.919806	0.827933	0.846966
0.677911	0.718128	0.738821	0.823989	0.772478	0.507625	0.677253	0.344535	0.536464	0.856562	0.920349	0.777768	0.710807	0.746954	0.658564	0.737345	0.880582	0.953456	1.01822	1.0144	0.997685	0.894054	0.865144	0.9008	0.717897	0.751882	0.784229	0.767263	0.835353	0.733908	0.701095	0.687785	0.713699	0.717773	0.767906	0.709104	0.692669	0.605094	0.540589	0.634072	0.682216	0.798188	0.780662	0.898299	0.884144	0.869621	0.810013	0.894116	0.878514	0.845603
1.24617	1.20852	1.3175	1.34559	1.2409	1.21046	1.21279	1.2757	1.30733	1.22028	1.27046	1.24586	1.25621	1.29369	1.27695	0.978764	1.01692	1.24499	1.29087	1.18797	0.955989	0.918783	1.20597	1.26636	1.14318	1.17612	1.15889	1.14468	1.12404	1.15817	1.0857	1.04824	1.048	1.11312	1.1007	1.058	1.05828	1.13614	1.12048	1.08626	1.17854	1.16586	1.17059	1.11172	1.13123	1.12675	1.12342	1.15701	1.10713	1.12358
0.485097	0.512604	0.534289	0.558382	0.571295	0.552792	0.543601	0.545725	0.561875	0.542384	0.550325	0.558444	0.562396	0.556981	0.56923	0.560466	0.566674	0.575419	0.569175	0.570438	0.583276	0.586769	0.565905	0.553456	0.562666	0.538383	0.54184	0.536651	0.556006	0.545615	0.551164	0.549205	0.514604	0.536615	0.530376	0.545562	0.510533	0.526374	0.520624	0.49368	0.542065	0.545734	0.540227	0.543913	0.5347	0.533668	0.529603	0.514635	0.516357	0.514984
0.685082	0.678115	0.674612	0.677088	0.68342	0.684146	0.658795	0.674521	0.649215	0.647764	0.643713	0.657003	0.658393	0.660883	0.68003	0.634229	0.608779	0.649999	0.663571	0.654334	0.625568	0.656512	0.678824	0.662811	0.592407	0.570165	0.567437	0.558948	0.563332	0.564421	0.589713	0.577463	0.642521	0.632285	0.635711	0.620709	0.622108	0.639239	0.708225	0.690759	0.717082	0.678703	0.675049	0.668581	0.620255	0.633342	0.61874	0.642188	0.607615	0.659074
1.00434	0.97874	0.96895	0.894306	0.86195	0.991907	0.891894	1.0184	1.14873	1.05224	0.970254	1.16121	1.12678	1.06341	1.00832	0.934534	0.832366	0.896957	0.941603	0.975277	0.984647	0.909702	0.822967	0.70191	0.789943	0.810213	0.83708	0.795387	0.819646	0.831069	0.771894	0.787129	0.816866	0.859885	0.771203	0.796057	0.77358	0.821722	0.855327	0.88584	0.756439	0.818068	0.74819	0.590776	0.696594	0.647074	0.504679	0.6564	0.68918	0.657731
1.21257	1.16806	0.913402	0.781269	0.873155	0.944572	0.815163	0.761689	0.785293	0.713817	0.590354	0.559868	0.578951	0.591001	0.811984	0.927471	1.04972	1.25525	1.39411	1.2853	1.11532	1.53969	1.3014	1.36294	1.40466	1.42257	1.36211	1.36963	1.3225	1.19691	1.20871	1.18807	1.10559	1.17666	1.08736	0.969544	1.00086	1.15671	1.12665	1.0674	1.01847	1.01154	1.24151	1.25651	1.19423	1.37582	1.49253	1.30869	1.45039	1.55751
0.803079	0.781839	0.783475	0.806356	0.786893	0.803041	0.797212	0.833942	0.837013	0.851377	0.82124	0.770529	0.794356	0.793197	0.741275	0.771648	0.773933	0.805313	0.734866	0.710211	0.671856	0.648925	0.688993	0.65141	0.651214	0.683636	0.651211	0.632218	0.622042	0.598871	0.609534	0.613149	0.597217	0.634028	0.62605	0.66375	0.637731	0.65313	0.707141	0.645612	0.60931	0.625639	0.605146	0.626878	0.638704	0.629717	0.661123	0.625415	0.621748	0.613549
0.69202	0.766274	0.721366	0.779877	0.755502	0.77211	0.739455	0.740555	0.75761	0.817179	0.780556	0.777077	0.778495	0.752672	0.744255	0.72674	0.735382	0.740161	0.780573	0.767303	0.775978	0.737289	0.735134	0.744307	0.712465	0.731433	0.709257	0.742932	0.722699	0.669381	0.716803	0.710749	0.669476	0.737842	0.742096	0.728081	0.779431	0.769117	0.757428	0.727302	0.693841	0.686675	0.714369	0.642798	0.713081	0.662971	0.579901	0.640674	0.626499	0.593357
0.782123	0.781959	0.702665	0.640444	0.692535	0.706719	0.67917	0.66785	0.713374	0.752591	0.791807	0.824491	0.738468	0.844465	0.762168	0.800002	0.83955	0.768873	0.745353	0.618474	0.770349	0.729296	0.730771	0.662877	0.785548	0.78141	0.843597	0.867934	0.916858	0.938945	0.977238	0.956736	0.962463	1.03356	0.99963	1.05042	1.00676	1.02621	1.00567	0.857265	0.926235	1.10509	0.821993	0.881189	1.09637	1.12048	1.10825	0.911259	0.947511	0.950426
0.595585	0.629809	0.563511	0.57584	0.543678	0.505318	0.490183	0.425831	0.455733	0.446162	0.453589	0.428395	0.427151	0.424977	0.442159	0.473301	0.471364	0.478735	0.442224	0.411778	0.533164	0.52351	0.507621	0.432416	0.433524	0.407944	0.383761	0.408989	0.457319	0.454262	0.456394	0.464709	0.479048	0.521607	0.55164	0.56803	0.544144	0.534528	0.572608	0.595371	0.576846	0.605123	0.630162	0.640121	0.584667	0.610061	0.606491	0.620892	0.634707	0.631306
1.14964	1.1118	1.24912	1.37317	1.1567	1.12729	1.11582	1.06802	1.17814	1.33217	1.1526	1.05739	1.00245	1.00257	1.00195	0.978097	0.870392	0.89952	0.916125	0.936943	1.04837	0.966357	1.1143	1.21577	1.22194	1.23272	1.23825	1.29584	1.39584	1.41182	1.31698	1.30923	1.36584	1.43926	1.44787	1.28815	1.38527	1.47324	1.45592	1.61174	1.68387	1.60564	1.55114	1.52242	1.49584	1.39119	1.1865	1.18165	1.11068	1.18539
0.92273	0.946143	1.01053	0.952593	1.00822	1.05006	1.01949	1.00758	0.950226	0.937559	0.920553	0.94712	0.906824	0.889272	0.917632	0.877807	0.903114	0.80221	0.798627	0.781508	0.78775	0.807744	0.794912	0.785463	0.821249	0.773103	0.833864	0.790697	0.764824	0.774197	0.791725	0.834198	0.788491	0.815095	0.837486	0.830251	0.811104	0.875437	0.856688	0.845349	0.858101	0.874362	0.864492	0.866907	0.843887	0.841187	0.846683	0.839846	0.81782	0.828165
0.982935	1.00253	0.903185	0.960374	0.977518	0.932769	0.904833	0.885689	0.893357	0.985276	0.842678	0.905354	0.910897	0.870066	0.83748	0.814046	0.79925	0.769889	0.776935	0.757815	0.772526	0.794397	0.813875	0.778679	0.831515	0.793051	0.849066	0.881716	0.886998	0.914817	0.859464	0.90873	0.943323	0.928784	0.904723	0.871454	0.870797	0.952615	0.887882	0.9384	0.95891	0.918832	1.02201	0.985341	1.01414	1.06262	1.00411	1.05676	1.09609	1.10977
1.21314	1.35662	1.42883	1.32614	1.49963	1.48825	1.48525	1.43445	1.54943	1.52594	1.55618	1.50286	1.4053	1.46581	1.43897	1.45393	1.45442	1.52989	1.39188	1.37929	1.32806	1.32202	1.23221	1.26335	1.22207	1.23592	1.25874	1.27893	1.36394	1.38747	1.26116	1.29971	1.41968	1.36021	1.36864	1.31237	1.3124	1.46142	1.44648	1.34817	1.46232	1.39994	1.40284	1.53057	1.31739	1.37488	1.4103	1.37396	1.24114	1.28771
1.19506	1.1737	1.0027	0.917087	1.01808	1.05881	1.12133	1.10817	1.1624	1.20093	1.16962	1.16221	1.20845	1.2292	1.22	1.21226	1.16133	1.22944	1.1862	1.20733	1.17673	1.21297	1.13321	1.13189	1.08442	1.1611	1.17424	1.11494	1.16908	1.26249	1.2113	1.14094	1.1265	1.21873	1.17909	1.29467	1.28708	1.33973	1.26741	1.28386	1.267	1.18543	1.32005	1.32843	1.30183	1.29684	1.24282	1.28187	1.1752	1.29624
0.848954	0.775514	0.777837	0.767402	0.733274	0.707705	0.722462	0.647622	0.671946	0.641107	0.633791	0.668998	0.605857	0.628143	0.610867	0.571156	0.555205	0.572183	0.562862	0.617241	0.616368	0.595812	0.642071	0.703928	0.771231	0.807175	0.653127	0.638014	0.659022	0.670975	0.672716	0.632876	0.641998	0.772022	0.662497	0.633573	0.69216	0.655338	0.655907	0.680733	0.701627	0.68569	0.68326	0.650602	0.662821	0.673958	0.692	0.682507	0.676784	0.708201
0.504627	0.475443	0.493941	0.475444	0.437404	0.506771	0.562293	0.528651	0.548456	0.532113	0.554662	0.580255	0.604641	0.605188	0.620034	0.55063	0.526392	0.565662	0.566724	0.572794	0.593059	0.566492	0.588321	0.573682	0.498281	0.548352	0.514856	0.464024	0.447084	0.434765	0.430137	0.452513	0.372517	0.290481	0.28707	0.258915	0.293017	0.319054	0.310218	0.283144	0.329938	0.35154	0.411111	0.355886	0.429191	0.448852	0.435618	0.423858	0.448331	0.400327
2.22256	2.21403	2.29846	2.42358	2.42277	2.31199	2.45618	2.39041	2.22385	2.18071	2.05285	2.03848	2.02646	2.03307	2.1102	2.04882	1.92138	1.93476	1.93941	1.94292	1.91042	1.92943	1.91666	1.90849	1.78699	1.75265	1.72004	1.67939	1.66751	1.6684	1.62738	1.71505	1.73913	1.80741	1.75192	1.57795	1.61438	1.69659	1.74653	1.76459	1.77585	1.82031	1.83736	1.83904	1.8618	1.83747	1.82644	1.82474	1.72519	1.66316
1.19582	1.18754	1.21264	1.18422	1.15815	1.13307	1.1523	1.12431	1.13093	1.06793	1.06432	1.08166	1.06007	1.01624	1.05421	1.04671	1.02977	1.02787	0.993711	0.987261	1.00691	1.00644	1.02288	1.01539	1.00092	0.983215	0.98181	0.982642	0.972745	0.966045	0.956181	0.967291	0.95656	1.01889	1.01954	1.02437	0.964144	0.967887	0.972828	0.957773	0.960885	0.976983	0.967642	0.952806	0.954994	0.95501	0.981598	0.955714	0.942432	0.973066
0.833144	0.902253	0.841902	0.87559	0.874956	0.885253	0.891791	0.88536	0.78752	0.773648	0.858923	0.849071	0.812829	0.892302	0.839139	0.806019	0.838194	0.917889	0.865329	0.922093	0.935168	0.914765	0.972208	0.852975	0.929738	0.904838	0.968697	0.896315	0.881205	0.871523	0.938305	0.954675	0.929827	0.926737	0.895156	0.960646	1.08548	1.03056	1.10092	1.0166	1.0402	1.08473	1.06628	1.02213	1.02284	1.01618	1.01664	0.980155	1.00935	0.979596
	1.21331	1.14503	1.22025	1.2516	1.2295	1.24213	1.28862	1.26663	1.31398	1.31189	1.29707	1.30014	1.2882	1.31161	1.22879	1.23432	1.31285	1.25128	1.28983	1.28887	1.27475	1.3293	1.23594	1.31163	1.24901	1.27979	1.28054	1.33199	1.29461	1.19001	1.25725	1.14115	1.10673	1.09381	1.14323	1.0371	1.12184	1.13269	1.1354	1.15909	1.09499	1.19736	1.10259	1.12382	1.15543	1.24286	1.17103	1.15731	1.21408
	1.49425	1.61612	1.50535	1.43328	1.37641	1.55288	1.48111	1.56047	1.48702	1.36062	1.432	1.42062	1.43757	1.47009	1.36752	1.34749	1.49324	1.5124	1.52641	1.40664	1.43551	1.36287	1.31583	1.41862	1.4512	1.51066	1.4112	1.48581	1.51256	1.34877	1.42735	1.28503	1.2082	1.21471	1.27457	1.16213	1.23981	1.22983	1.109	1.21908	1.18763	1.19811	1.24659	1.10721	1.31266	1.39617	1.32091	1.48961	1.40126
			0.596209	0.560072	0.563592	0.57178	0.583272	0.565464	0.544818	0.542263	0.495121	0.478339	0.464311	0.43415	0.41389	0.454307	0.454035	0.498025	0.483418	0.519353	0.505031	0.516932	0.549926	0.527425	0.536721	0.528243	0.544668	0.570047	0.575719	0.571086	0.623721	0.561797	0.595724	0.576733	0.572728	0.595981	0.627057	0.665977	0.695242	0.741846	0.722361	0.662635	0.710959	0.681161	0.681882	0.732468	0.704358	0.78719	0.727486
						1.76872	1.72453	1.65584	0.938189	0.773031	1.10268	1.69859	1.6774	0.834662	0.909315	1.77624	1.84334	1.72826	1.76784	1.65913	1.66963	1.47879	1.19414	1.34553	0.626568	0.551497	1.3956	1.39476	1.33857	1.45118	1.48206	1.37695	0.897892	0.943428	1.00316	1.01412	1.18811	1.31528	1.22692	1.37361	1.59326	1.33764	1.69245	1.79816	1.56063	1.32311	1.02828	0.73346	0.452588
									0.20655	0.522118	1.10568	0.960676	0.835266	0.737882	0.609213	0.623573	0.58525	0.541038	0.539876	0.565377	0.575422	0.595408	0.579725	0.640235	0.563401	0.551024	0.541608	0.517847	0.474795	0.52182	0.503224	0.520815	0.531756	0.53238	0.542528	0.574369	0.569079	0.607865	0.596077	0.604122	0.619058	0.619968	0.651354	0.604519	0.635593	0.6251	0.628989	0.671237	0.679004
Treatments: 0.1% Vehicle, then 0.1x EAA, then 10ug/mL Ins
Replicate 1
1.31096	1.41508	1.41122	1.38464	1.39528	1.41065	1.45541	1.50601	1.53542	1.4395	1.49656	1.41964	1.30535	1.37539	1.37817	1.41031	1.32833	1.27866	1.26205	1.30625	1.31552	1.30498	1.22506	1.151	1.33015	1.26072	1.32693	1.31056	1.30493	1.27587	1.31988	1.25762	1.31376	1.40365	1.39948	1.33662	1.47325	1.3399	1.37147	1.54779	1.56445	1.58262	1.71749	1.63897	1.65165	1.82733	1.74248	1.86196	1.79347	1.71192
0.901872	0.914708	0.874975	0.843787	0.84045	0.804672	0.788994	0.83205	0.848953	0.809429	0.897238	0.875619	0.87044	0.93936	0.991554	1.02205	0.967481	0.873208	0.828904	0.821794	0.850756	0.837757	0.912507	0.91894	0.91384	0.899073	0.913439	0.876502	0.867378	0.875326	0.872608	0.834433	0.922986	1.02129	1.10026	1.14974	1.20415	1.31815	1.30561	1.43702	1.47993	1.61246	1.58715	1.53352	1.55313	1.49669	1.42527	1.38555	1.36703	1.28841
1.38772	1.27279	1.29825	1.29362	1.52162	1.40107	1.12967	1.00853	1.09717	1.00048	1.00116	1.16081	1.28644	1.47645	1.2689	1.18272	0.972476	0.993324	0.928156	0.963664	0.94127	1.02401	1.13579	1.09424	1.18889	1.17862	1.0433	1.06371	1.09457	1.36088	1.30201	1.15001	1.23757	1.2446	1.25691	1.40606	1.60418	1.86535	1.68495	1.63959	1.9732	1.8441	1.76815	1.61377	1.53549	1.42803	1.50191	1.51279	1.37598	1.31795
1.58834	1.55754	1.67659	1.58972	1.58348	1.66235	1.74741	1.58998	1.56258	1.65987	1.47332	1.29022	1.32609	1.2666	1.50268	1.35703	1.56225	1.51907	1.75029	1.59404	1.44132	1.62236	1.56481	1.59642	1.52642	1.16177	1.19319	1.11724	1.17455	1.10464	1.17522	1.23109	1.24592	1.18474	1.23409	1.22295	1.22428	1.32982	1.27462	1.25842	1.13377	1.30251	1.28989	1.93922	1.73839	1.81571	1.69772	1.83377	1.59471	1.60979
1.33362	1.26252	1.48154	1.33829	1.35174	1.48287	1.51607	1.32387	1.36117	1.44448	1.50473	1.57151	1.47536	1.41392	1.31996	1.36736	1.40272	1.36709	1.29665	1.23546	1.23144	1.30814	1.3234	1.36507	1.28598	1.39794	1.32119	1.39216	1.41798	1.49922	1.5507	1.57123	1.76845	1.70585	1.69971	1.70691	1.56471	1.62922	1.72411	1.61894	1.35776	1.50805	1.49692	1.49348	1.36858	1.39077	1.45598	1.46918	1.60024	1.786
0.793183	0.835278	0.866316	0.878679	0.848091	0.907226	0.891988	0.883613	0.860846	0.846483	0.838828	0.880746	0.884752	0.909225	0.919953	0.880912	0.921789	0.889643	0.799644	0.821416	0.859472	0.829689	0.821359	0.781468	0.776123	0.820311	0.761508	0.753368	0.749059	0.769194	0.761441	0.790398	0.800642	0.979698	1.06454	1.15637	1.24495	1.24375	1.3209	1.14454	1.19207	1.18095	1.16733	1.16	1.10508	1.01599	0.967264	0.963594	0.977263	0.981899
0.547234	0.585381	0.616223	0.614051	0.64019	0.653356	0.67885	0.689875	0.676278	0.696595	0.701556	0.734538	0.717535	0.724941	0.745064	0.774181	0.804536	0.811174	0.852509	0.821092	0.805803	0.762824	0.765293	0.713069	0.715325	0.693869	0.664092	0.671358	0.66327	0.652668	0.642515	0.66359	0.774944	0.837866	0.823004	0.831671	0.878817	0.865229	0.901033	0.90916	0.93389	0.839236	0.844435	0.846239	0.842406	0.836934	0.81023	0.80819	0.799776	0.792621
0.873749	0.885637	0.860694	0.820482	0.797102	0.784734	0.853787	0.842537	0.838915	0.817796	0.80736	0.800331	0.749222	0.762084	0.774817	0.760963	0.772661	0.798054	0.79646	0.80132	0.781907	0.8063	0.81608	0.809647	0.792732	0.697014	0.681169	0.728403	0.773981	0.840625	0.822132	0.832847	0.931147	0.939011	1.0171	1.07975	1.07395	1.039	1.06656	1.0668	1.04625	1.02836	1.10478	1.05644	1.07927	1.0817	1.07791	1.07019	1.01448	1.0302
1.27022	1.32653	1.62372	1.51072	1.61092	1.69675	1.6511	1.64068	1.63413	1.32053	1.34242	1.39072	1.31864	1.25256	1.28416	1.16099	1.0735	0.953943	0.95853	0.858824	0.92514	0.943898	0.942183	0.933213	0.895053	0.920257	1.01424	0.966708	0.885118	0.754429	0.692242	0.614189	0.643666	0.751895	0.900871	1.0063	1.0449	1.15141	1.2067	1.2691	1.24119	1.39508	1.45732	1.40676	1.41165	1.27582	1.30909	1.52418	1.45941	1.62111
0.869652	0.94398	0.935337	0.930319	0.951357	0.940309	0.948638	0.965288	0.917401	0.924495	0.88956	0.921311	0.910298	0.898425	0.890295	0.849023	0.86798	0.855431	0.84638	0.81337	0.83782	0.849104	0.885464	0.839567	0.826489	0.852912	0.908238	1.02594	0.949186	0.932134	0.916842	0.988973	1.03023	1.07692	1.11193	1.22221	1.28079	0.846709	0.673491	0.637422	0.681252	0.720803	0.738491	0.719321	0.812576	0.784098	0.79341	0.855366	0.974383	0.831297
1.18169	1.00108	0.970821	0.989089	1.06298	1.17294	1.21326	1.22583	1.12745	1.21114	1.17127	1.17917	1.13773	1.21009	1.17829	1.20686	1.182	1.15689	1.14301	1.14389	1.17307	1.19537	1.25356	1.16357	1.23646	1.25147	1.16341	1.16663	1.22403	1.13571	1.0906	1.05276	1.11705	1.15031	1.13711	1.14802	1.24877	1.22075	1.22697	1.29615	1.25399	1.25502	1.25828	1.31231	1.29023	1.19299	1.21099	1.24029	1.26637	1.41312
0.813272	0.792774	0.803882	0.793268	0.814884	0.761764	0.758074	0.767261	0.758263	0.784516	0.769418	0.759878	0.752428	0.776849	0.792741	0.774086	0.752005	0.734372	0.709248	0.711116	0.764556	0.792551	0.755263	0.761921	0.773138	0.769269	0.745994	0.687117	0.705091	0.738561	0.660638	0.647183	0.721188	0.716461	0.716772	0.828369	0.929202	0.894785	0.980211	0.966706	1.05748	0.939253	0.915057	0.950975	0.932483	0.98326	1.02286	0.970854	0.986323	0.967826
0.645242	0.667771	0.659591	0.694041	0.647564	0.656473	0.6912	0.703178	0.69768	0.712978	0.744863	0.767466	0.732055	0.733042	0.759207	0.74856	0.716902	0.716673	0.699192	0.702945	0.707774	0.705519	0.678129	0.682692	0.699091	0.671877	0.661599	0.701251	0.670449	0.714579	0.73239	0.703496	0.7311	0.815605	0.844707	0.893616	0.875705	0.870927	0.800986	0.7967	0.834737	0.82185	0.836934	0.824137	0.798561	0.797394	0.763176	0.78906	0.745129	0.678736
1.40969	0.85945	0.84506	0.977925	1.17413	1.28732	1.39578	1.7856	1.83094	1.59355	1.37459	1.1101	0.89381	0.82467	1.09724	1.1246	1.18215	1.24329	1.09192	1.13593	1.50083	1.39477	1.13211	1.11808	1.14982	0.98397	1.03312	0.997291	0.964965	0.947525	0.825312	0.705091	0.708333	0.68345	0.654274	0.982019	1.18824	1.17611	1.13043	1.41994	1.39707	1.49014	1.59549	1.64366	1.74624	1.78622	1.80426	1.70865	1.72508	2.1047
1.00817	1.01074	1.00444	0.972592	1.02457	0.956617	1.02482	0.989349	1.06769	0.982871	1.03297	0.999038	0.978043	1.01185	0.982143	0.998665	0.992961	1.02139	0.998971	0.992977	0.972902	1.00033	0.929975	0.993734	0.995947	0.9944	1.04273	1.02284	1.04841	1.00842	1.04816	1.04118	1.07122	1.17454	1.22793	1.24248	1.29523	1.32173	1.40756	1.47619	1.49346	1.41291	1.50208	1.43265	1.44055	1.4043	1.49477	1.38433	1.39918	1.48445
0.36424	0.31901	0.287671	0.323366	0.319583	0.390291	0.573894	0.633024	0.60399	0.673233	0.592817	0.740961	0.701538	0.692042	0.718518	0.713104	0.650886	0.647088	0.6307	0.653279	0.672035	0.737019	0.742845	0.69596	0.597262	0.593679	0.627783	0.585247	0.612959	0.672018	0.68694	0.739209	1.2104	1.18412	1.52377	1.89975	2.39331	2.62555	2.79587	2.69581	2.43529	2.1402	2.58345	2.59838	2.12892	1.70378	1.52689	1.45396	1.38366	1.61082
1.00596	1.01346	0.995347	1.05091	1.06469	1.01758	0.95031	1.09004	1.00681	1.14223	1.13765	1.12012	1.28026	1.18078	1.15993	1.08384	0.976381	0.769129	0.768992	0.684561	0.675081	0.737919	0.662989	0.662749	0.687863	0.621061	0.636501	0.702428	0.725669	0.714962	0.771108	0.837136	1.04257	1.10827	1.23758	1.31169	1.28718	1.40625	1.21693	1.11908	0.949415	0.864656	0.921107	0.861621	0.840502	0.758367	0.743071	0.747714	0.766314	0.816036
1.61589	1.44383	1.75088	1.64254	1.38224	1.41463	1.58217	1.47467	1.6082	1.64518	1.5029	1.62847	1.59331	1.62529	1.62205	2.06134	2.39568	2.83871	2.92126	2.23555	2.47649	2.63344	2.97586	2.71488	2.15089	2.07332	1.34064	1.35594	1.57746	1.95645	1.73507	1.60083	1.47806	1.45274	1.52369	1.4291	1.4195	1.63219	1.48696	2.25097	2.44282	2.67623	2.09627	2.0537	2.13353	1.67375	1.35873	1.37605	1.34333	1.38871
0.970839	0.989272	0.773443	0.745936	0.765515	0.753695	0.80613	0.890418	0.796974	0.929041	1.01674	1.04498	1.08239	1.13444	1.19002	1.1621	1.26777	1.19112	1.11257	1.15791	1.26353	1.33685	1.32316	1.49744	1.5141	1.36955	1.51119	1.57401	1.65248	1.50676	1.79332	1.74228	1.69002	1.76631	1.85442	2.00065	2.04945	2.19185	2.23484	2.30076	2.24125	2.19971	2.14305	2.16468	2.08308	2.12016	2.30849	2.47318	2.28351	2.36847
2.45468	2.08973	1.88723	1.9923	1.79635	1.84388	1.76491	1.88507	1.91338	2.04626	1.69445	1.90571	1.49655	1.43515	1.55389	1.5912	1.41508	1.33302	1.46599	1.48156	1.34384	1.26705	1.3505	1.40758	1.33474	1.30259	1.32299	1.35722	1.29215	1.3162	1.24841	1.3094	1.36471	1.62974	1.77252	2.13616	1.89362	1.71113	1.67088	1.86284	1.62989	1.70585	1.65953	1.4278	1.45258	1.42325	1.41011	1.3939	1.6251	1.58266
1.55886	1.62358	1.42622	1.52613	1.43056	1.42226	1.51909	1.36486	1.3278	1.2908	1.19898	1.21316	1.44846	1.71499	1.8245	1.85367	1.92938	1.68222	1.62094	1.51183	1.42408	1.54158	1.48023	1.47741	1.26469	1.16016	1.09684	1.03461	1.10137	1.05787	0.970489	1.00206	1.15074	1.19678	1.21827	1.26858	1.31646	1.32889	1.40955	1.37306	1.29436	1.2979	1.37886	1.45387	1.39358	1.41063	1.37161	1.46938	1.44501	1.44178
1.61726	1.53014	1.55666	1.56906	1.48319	1.52232	1.49497	1.4393	1.29395	1.34703	1.39457	1.34636	1.44306	1.42037	1.40578	1.37867	1.28556	1.23422	1.22611	1.251	1.25666	1.27403	1.33683	1.43861	1.32576	1.28885	1.36116	1.33271	1.31775	1.32459	1.25219	1.22806	1.25623	1.20816	1.17362	1.2334	1.25345	1.30125	1.39375	1.32997	1.31646	1.25675	1.23343	1.26282	1.2542	1.23349	1.24519	1.1352	1.16036	1.20552
0.631597	0.716653	0.71369	0.776695	0.874854	0.900533	0.893823	0.921191	0.939063	0.902824	0.940602	0.975051	0.920239	0.941443	0.981799	0.930308	0.912711	0.901013	0.859668	0.893636	0.937251	0.913558	0.905205	0.922102	0.963557	0.973692	1.05755	1.02089	0.950629	1.05233	1.04393	1.03351	1.14536	1.18276	1.32089	1.54522	1.50097	1.59421	1.34529	1.36803	1.16766	1.1832	1.18296	1.19923	1.32787	1.12788	1.2557	1.31951	1.37974	1.381
1.10243	1.21113	1.13712	1.10973	1.04109	1.09529	1.07038	1.04876	1.06424	1.0593	1.0404	1.09199	1.10112	1.15984	1.08894	1.22529	1.27145	1.21203	1.0972	1.07323	1.09493	1.11801	1.16292	1.18842	1.24173	1.23924	1.23449	1.19475	1.10074	1.19286	1.16959	1.15967	1.20639	1.10831	1.16111	1.24537	1.21887	1.24136	1.14386	1.1867	1.21558	1.23551	1.20662	1.23467	1.11839	1.12338	1.2534	1.27125	1.10293	1.18689
0.649469	0.640851	0.73734	0.753765	0.730478	0.662801	0.641353	0.630197	0.644607	0.623089	0.614214	0.604977	0.636495	0.60058	0.627911	0.626834	0.62626	0.61848	0.580267	0.535928	0.523398	0.544479	0.548629	0.585615	0.636419	0.579528	0.559278	0.539124	0.510896	0.508186	0.505466	0.534085	0.565455	0.580024	0.587236	0.573388	0.58581	0.588297	0.673021	0.592168	0.693059	0.590662	0.623581	0.655002	0.62552	0.623845	0.67144	0.689622	0.705148	0.661898
1.41728	1.37072	1.3702	1.3578	1.33326	1.32328	1.34845	1.18007	1.2636	1.17995	1.21229	1.27877	1.15626	1.08822	1.10739	1.14835	1.0255	0.968719	1.0118	1.01279	1.04663	1.01201	1.07533	1.0883	1.05481	1.04815	1.04176	1.04083	1.00764	1.02474	0.999889	0.988719	1.01766	1.16063	1.32115	1.36583	1.52875	1.5258	1.55445	1.56073	1.6069	1.51232	1.53919	1.50332	1.58539	1.63119	1.74201	1.66721	1.61204	1.66508
0.817166	0.845297	0.904451	0.920253	0.836252	0.796554	0.646529	0.678667	0.692195	0.606823	0.69533	0.694509	0.753436	0.666905	0.734198	0.753403	0.852604	0.816374	0.806641	0.807922	0.898202	0.842038	0.843494	0.776031	0.790582	0.830767	0.752493	0.85615	1.12049	1.14499	1.12097	1.06227	1.06686	1.11924	1.11236	1.20002	1.30334	1.41647	1.42106	1.38497	1.44187	1.45107	1.41678	1.42176	1.50937	1.35634	1.36982	1.35125	1.39489	1.30049
0.897822	0.901418	0.912593	0.918364	0.871689	0.794876	0.845302	0.831488	0.842561	0.893396	1.13964	0.215841	0.152236	0.163511	0.160138	0.147585	0.252055	1.19848	1.1849	1.16467	1.124	1.11846	1.11373	1.03285	1.01886	1.05833	1.03156	0.957639	1.03791	1.06928	1.0379	1.12607	1.09891	1.41613	1.43799	1.28046	1.0742	1.09264	1.14488	1.20747	1.15798	1.287	1.51772	1.44934	1.38293	1.39106	1.39732	1.39714	1.66564	1.54249
1.26103	1.22237	1.19831	1.16489	1.14455	1.08123	1.03809	1.01838	0.921414	0.917248	0.916399	0.931643	0.924909	0.921016	0.907798	0.930464	0.950022	0.878032	0.92278	0.968292	0.963182	0.946382	0.941442	1.01096	0.941065	0.953536	1.03991	1.05813	1.08586	1.12892	1.14151	1.04039	1.17478	1.35999	1.45994	1.4279	1.33775	1.26304	1.16862	1.18649	1.19712	1.22602	1.25579	1.25361	1.19884	1.29423	1.31693	1.33041	1.26717	1.27108
1.4416	1.42308	1.51477	1.40555	1.43312	1.36402	1.45901	1.55647	1.4085	1.36908	1.37688	1.34991	1.33451	1.4383	1.41885	1.32598	1.31752	1.33191	1.2772	1.22605	1.22495	1.27636	1.28278	1.3477	1.31387	1.40825	1.38084	1.39392	1.15727	1.39684	1.42172	1.54326	1.46836	1.69264	1.76343	1.81839	1.74913	1.7252	1.71573	1.70712	1.68208	1.2993	1.75375	1.70642	1.83787	1.8409	1.8208	1.78662	1.86121	1.77164
0.682589	0.657684	0.727653	0.818136	0.779369	0.852129	0.937173	0.925428	0.844417	0.877446	0.885291	0.885544	0.878129	0.843663	0.900228	0.985889	1.08824	0.901667	0.845028	0.899102	0.864288	0.923833	0.894745	0.958716	0.898665	0.879153	0.844258	0.850569	0.85268	0.955466	0.914815	0.978448	0.998723	0.982699	1.04033	1.02477	1.05376	1.10483	1.0686	1.05984	1.06908	0.997077	1.14079	1.05925	1.09877	1.08178	1.1917	1.22879	1.22626	1.31696
1.23126	1.25779	1.26345	1.23091	1.26802	1.20766	1.19779	1.13366	1.17974	1.10174	1.14883	1.06932	1.02814	1.01096	1.01092	0.956643	0.928528	0.903896	0.959889	0.901558	0.855686	0.89366	0.884741	0.854895	0.799661	0.804564	0.868027	0.833995	0.725149	0.76188	0.782128	0.768403	0.846184	0.923557	0.978349	1.08519	1.20906	1.20541	1.15843	1.09044	1.04453	1.16418	1.23736	1.2562	1.24641	1.27479	1.29054	1.21418	1.27822	1.25179
1.23092	1.28591	1.22274	1.16132	1.18905	1.21121	1.12899	1.14829	1.15875	1.16124	1.23462	1.19509	1.23021	1.18174	1.26953	1.30016	1.19983	1.20069	1.15784	1.11738	1.13303	1.01438	1.09729	1.10505	1.1365	1.15825	1.25807	1.14712	1.13299	1.08192	1.05372	1.017	1.14331	1.20616	1.26644	1.43107	1.49329	1.56272	1.56548	1.63929	1.52039	1.5666	1.48905	1.52684	1.64106	1.8001	1.99098	2.09731	1.81956	1.96918
0.820082	0.797914	0.785524	0.835337	0.880065	0.764808	0.67544	0.52782	0.691023	0.666409	0.614888	0.639882	0.722496	0.924713	1.07892	1.218	1.4684	0.823506	0.583523	0.613211	0.662969	0.583718	0.547594	0.475563	0.522296	0.601806	0.746755	0.967541	0.956599	0.829431	0.859434	1.01659	1.21199	1.3051	1.42905	2.06292	1.05664	1.38255	0.982727	0.759217	0.941201	1.51278	1.20563	1.31382	1.12512	1.68181	1.76783	1.88779	1.56083	1.03002
0.566567	0.568533	0.622764	0.654389	0.618005	0.644216	0.637712	0.591575	0.638349	0.628306	0.62435	0.622236	0.711114	0.716357	0.695649	0.70348	0.772074	0.741903	0.722757	0.681069	0.651291	0.665753	0.681696	0.683945	0.649864	0.671497	0.641723	0.666674	0.655363	0.690854	0.644867	0.579747	0.59555	0.648435	0.770186	0.811572	0.863214	0.887006	0.925928	0.993269	0.971804	0.973499	0.907256	0.869443	0.871773	0.821239	0.822974	0.920455	0.944792	0.969374
1.00433	0.95744	0.949027	0.940402	0.957966	0.921373	0.870893	0.90284	0.954222	0.980191	0.950699	0.956079	0.928978	0.907456	0.92253	0.898534	0.904734	0.949106	0.871713	0.92151	0.909251	0.906908	0.897604	0.939368	0.947534	0.946739	0.97	0.953623	0.947781	0.974498	0.907125	0.909828	0.999342	1.11662	1.16623	1.16333	1.28893	1.33416	1.352	1.42419	1.49759	1.54383	1.50754	1.60362	1.60202	1.57911	1.67731	1.61801	1.63294	1.43978
0.768936	0.816849	0.818714	0.769744	0.8366	0.833717	0.807789	0.823745	0.858764	0.843082	0.906487	0.944456	0.903923	0.921292	0.862912	0.834378	0.808199	0.793563	0.745046	0.75829	0.786739	0.743621	0.726369	0.731414	0.746719	0.7414	0.762447	0.772814	0.734249	0.72991	0.767022	0.782519	0.774718	0.897166	1.03282	1.19076	1.21878	1.17888	1.18898	1.15142	1.08766	1.09044	1.07554	1.05406	1.07065	1.08439	1.08883	1.04926	1.0327	1.02458
0.925009	0.900795	0.925753	0.936951	0.955842	0.863083	0.802008	0.799164	0.868895	0.941965	0.889223	0.885327	0.886642	0.876912	0.885114	0.857879	0.872988	0.819722	0.782652	0.843106	0.839464	0.869756	0.915529	0.85234	0.839657	0.937666	0.9026	0.854888	0.789477	0.815071	0.859755	0.872378	0.937016	1.05633	1.10044	1.1698	1.33193	1.54338	1.40823	1.50607	1.64805	1.77375	2.00578	1.96284	2.04303	2.01824	2.10143	2.19189	2.03394	2.10299
0.744411	0.602316	0.550983	0.612106	0.646789	0.704477	0.622938	0.475777	0.475435	0.584483	0.572204	0.531473	0.50472	0.531199	0.476325	0.48608	0.497582	0.495537	0.432631	0.479533	0.475487	0.465097	0.42547	0.427497	0.473779	0.497339	0.547235	0.56471	0.523577	0.469555	0.508258	0.573816	0.577666	0.598638	0.672621	0.678211	0.684611	0.742241	0.714011	0.684208	0.619118	0.659562	0.683579	0.730045	0.762469	0.742299	0.808136	0.888862	0.908362	0.817466
0.97015	0.946589	1.06155	0.990075	1.06629	1.00724	1.05648	1.01327	1.0935	1.12061	1.07431	1.1298	1.07905	1.13474	1.12236	1.1766	1.21227	1.15445	1.1079	1.22014	1.18172	1.1877	1.17401	1.2161	1.08561	1.15133	1.14177	1.19341	0.927154	1.14061	1.19614	1.22065	1.16955	1.26264	1.35748	1.33	1.32944	1.37348	1.33088	1.40291	1.35169	1.48568	1.45145	1.44446	1.41725	1.35513	1.42376	1.4532	1.33879	1.42378
1.44079	1.41524	1.35504	1.34805	1.36157	1.30318	1.31146	1.34539	1.19114	1.1922	1.15998	1.19169	1.24188	1.1562	1.10383	1.1658	1.1988	1.18445	1.15947	1.19391	1.18955	1.26364	1.26194	1.3217	1.21483	1.25545	1.30248	1.34473	1.33927	1.35888	1.36175	1.34826	1.4088	1.50945	1.50836	1.57807	1.69447	1.81669	1.73388	1.71792	1.96576	1.88991	1.96288	1.8805	1.83576	1.92848	2.10493	1.8168	1.91444	1.98009
1.1235	1.12497	1.1258	1.15482	1.14206	1.08617	1.09104	1.09245	1.04377	1.12517	1.12569	1.20334	1.16164	1.12486	1.17554	1.17351	1.12283	1.08263	1.02871	1.01455	1.0315	0.977694	1.01072	1.07717	1.02269	1.04827	1.07614	1.11573	1.12848	1.07984	1.1729	1.1753	1.25218	1.31833	1.38548	1.37258	1.31119	1.41034	1.4328	1.38874	1.46959	1.49962	1.53328	1.42831	1.44101	1.41218	1.51335	1.49702	1.43788	1.38936
1.15013	1.19038	1.24559	1.32524	1.34853	1.20472	1.12651	1.10969	1.10821	1.6629	1.76391	1.90364	1.61327	1.46002	1.43606	1.40594	1.54341	1.69307	1.48061	1.9371	2.10511	1.61497	1.64208	1.43102	1.55342	1.54542	1.46284	1.3753	1.37456	1.44184	1.38158	1.32765	1.31697	1.36359	1.41293	1.39666	1.37623	1.43639	1.47526	1.35754	1.52038	1.42734	1.47006	1.44375	1.50054	1.50271	1.41989	1.51864	1.49797	1.41653
0.974925	0.957268	0.991763	0.95863	0.978584	0.969565	1.09121	1.02965	1.06075	1.01028	1.11747	1.13579	1.08897	1.08907	1.07954	0.985846	0.931517	0.888302	0.867537	0.873247	0.913715	1.07774	1.00327	0.984167	0.947694	0.916056	0.924266	0.964987	0.978548	0.950453	0.919262	0.955062	0.951852	1.09163	1.1126	1.32011	1.1768	1.22351	1.1389	1.10782	1.38767	1.60933	1.21849	1.35443	1.28517	1.22846	1.13097	1.09651	1.02322	1.01727
0.802978	0.768816	0.778961	0.823469	0.86859	0.879873	0.871921	0.838859	0.814571	0.857609	0.869681	0.833719	0.805376	0.78726	0.739061	0.762371	0.720046	0.711138	0.721209	0.702192	0.696694	0.687229	0.648098	0.62456	0.642295	0.683856	0.695125	0.691696	0.681335	0.714076	0.714183	0.671348	0.766295	0.891174	0.962693	1.02269	1.05776	1.0358	1.0855	0.918672	0.937927	1.11707	1.19787	1.18264	1.22148	1.19217	1.17039	1.25435	1.20602	1.20137
1.17988	1.16789	1.15967	1.23294	1.20932	1.12651	1.18694	1.06068	1.06297	1.02875	1.0116	1.03877	1.03835	1.04808	0.995136	1.16946	1.04344	0.997341	0.993487	0.937178	1.05675	1.05732	1.01758	0.998011	1.00255	0.96979	0.978454	1.06369	1.05014	1.14203	1.06654	1.0536	1.1003	1.11402	1.11005	1.31606	1.36677	1.56065	1.68697	1.75893	1.68002	1.76316	1.97858	1.5405	1.60955	1.42446	1.38147	1.47664	1.43526	1.56159
0.57962	0.634082	0.595073	0.590512	0.571165	0.557288	0.549224	0.568652	0.576225	0.631261	0.626089	0.62969	0.636341	0.676931	0.760608	0.811639	0.89899	0.88133	0.837722	0.873847	0.850669	0.842198	0.859913	0.853564	0.857467	0.838416	0.720396	0.696782	0.593575	0.75207	0.78979	0.788622	0.814681	0.86442	0.75395	0.796746	0.72215	0.822575	0.708288	0.687473	0.641472	0.664288	0.639874	0.753841	0.844717	0.836904	0.797389	0.834391	0.912234	1.05423
0.873382	0.930373	0.946655	0.936327	0.883973	0.933578	1.05286	1.10069	0.989025	1.00909	1.03305	0.965894	1.0026	0.991273	1.03708	1.00922	0.964139	0.993454	0.988297	0.955569	0.93231	0.952509	0.875718	0.887327	0.866779	0.816804	0.790892	0.884182	0.811255	0.763572	0.838488	0.763418	0.861541	1.11518	1.27332	1.34538	1.4074	1.42472	1.50069	1.30091	1.29204	1.33825	1.38252	1.26544	1.27609	1.27584	1.25071	1.26155	1.25323	1.08685
1.16572	1.15058	1.17848	1.15563	1.11466	1.06855	1.05717	1.07215	1.0736	1.00764	1.03317	1.02312	1.00757	0.988954	1.01264	1.07672	1.05473	1.09554	1.06509	1.0294	0.979883	1.01321	1.00136	1.04392	1.04874	1.06517	1.07773	1.04601	1.04097	1.06821	1.04467	1.03814	1.2079	1.32192	1.44006	1.62297	1.63543	1.6096	1.60844	1.61363	1.71021	1.76721	1.81436	1.77556	1.76739	1.78024	1.65368	1.6579	1.65867	1.57295
0.799326	0.80831	0.886184	0.952543	0.873024	0.889166	0.864648	0.871201	0.910387	0.926798	0.901099	0.946556	0.868529	0.83339	0.846713	0.834023	0.789113	0.804928	0.844003	0.807489	0.869499	0.872941	0.941744	0.810053	0.900125	1.05453	0.878633	0.775302	0.745726	0.79681	0.459761	0.712212	0.716508	0.996381	0.983928	1.08026	1.12248	0.996111	1.01971	1.07816	1.17091	1.25243	1.12247	1.23732	1.30834	1.35507	1.31966	1.30859	1.13598	1.14067
1.50064	1.427	1.41021	1.40829	1.39081	1.34258	1.34132	1.32344	1.24148	1.19639	1.18327	1.15302	1.12938	1.13761	1.17968	1.21908	1.20222	1.16721	1.20787	1.23054	1.18839	1.2341	1.24145	1.23639	1.22226	1.26273	1.26276	1.27258	1.2878	1.29365	1.30136	1.17906	1.16702	1.25377	1.22623	1.42952	1.44472	1.5974	1.7368	1.64559	1.68432	1.46292	1.38732	1.60335	1.58638	1.41544	1.45254	1.38084	1.40663	1.35665
1.73843	1.75116	1.76347	1.71208	1.61656	1.62788	1.5283	1.4714	1.43597	1.4113	1.38899	1.38103	1.36778	1.31972	1.40603	1.34127	1.44796	1.35415	1.34641	1.36495	1.44515	1.40734	1.39232	1.38302	1.357	1.41026	1.37205	1.40255	1.41936	1.38052	1.44895	1.39835	1.52187	1.54051	1.64541	1.72738	2.10374	1.93106	1.80662	1.91413	2.10304	2.18519	2.1698	1.92322	1.91572	1.88664	1.87252	1.90947	1.97627	1.94164
1.12508	1.13318	1.14527	1.12443	1.08456	1.08238	1.10486	1.13692	1.06985	1.10948	1.09423	1.06694	1.10198	1.05146	1.11247	1.07411	0.991211	1.00099	1.01725	1.04771	1.03082	1.0783	1.07612	1.12149	1.12045	1.15053	1.1484	1.09743	1.05189	1.02337	1.06381	1.07962	1.20882	1.21411	1.16221	1.22142	1.18641	1.18306	1.19934	1.12083	1.05905	1.10129	1.16293	1.14404	1.14459	1.19597	1.19304	1.26598	1.20467	1.15305
1.00733	0.944348	0.936585	0.872948	0.911441	0.921069	0.893336	0.8632	0.785276	0.840896	0.881058	0.849835	0.855503	0.890906	0.923298	0.966197	0.93775	0.998157	1.06428	1.08665	1.01027	0.958356	0.998714	0.983228	0.93673	0.968603	0.949284	0.965939	0.978648	0.959923	0.963141	0.956895	1.04365	1.06316	1.09312	1.15558	1.22607	1.31259	1.32294	1.30156	1.33858	1.43133	1.42737	1.41671	1.33883	1.24259	1.30357	1.402	1.46629	1.35414
0.764623	0.832346	0.751943	0.739287	0.733321	0.730996	0.673282	0.677304	0.697464	0.731509	0.67881	0.684042	0.66345	0.690867	0.697552	0.679915	0.656791	0.650018	0.688495	0.659294	0.664613	0.6572	0.646666	0.669389	0.661339	0.658846	0.658548	0.652684	0.642655	0.647341	0.663859	0.656442	0.748713	0.878247	0.964221	1.02986	1.11916	1.17809	1.19555	1.22967	1.23246	1.23982	1.2031	1.20858	1.15668	1.14278	1.14025	1.1132	1.12813	1.17053
1.11341	1.05392	1.03153	1.01115	0.953393	0.966427	0.977364	0.970051	0.974495	0.944682	0.97566	0.934893	0.962264	0.996039	1.00635	0.993639	0.95571	0.890138	0.911674	0.900639	0.902068	0.989889	1.05224	1.03653	0.999308	0.959279	0.913754	0.89743	0.89844	0.897867	0.890588	0.87185	0.958031	0.955842	1.0483	1.00015	1.00695	0.957911	0.988559	0.927538	0.901464	0.884969	0.898213	0.889029	0.868869	0.867369	0.813613	0.762744	0.57512	0.484322
1.22156	1.18013	1.18956	1.22289	1.09545	1.03787	1.09151	1.03898	1.03998	1.07248	1.07475	1.10494	1.06469	1.08287	1.08905	1.03865	1.07237	1.04913	1.0867	1.02063	1.01407	0.973052	1.05288	1.06024	1.18011	1.17816	1.21548	1.16642	1.13688	1.14993	1.08688	1.10529	1.03507	1.07222	1.15897	1.15556	1.11717	1.20636	1.18907	1.16808	1.13121	1.1121	1.14061	1.04293	1.04431	1.08206	1.1032	1.12104	1.10128	1.1126
0.981235	0.983438	1.01772	0.976998	1.0176	1.0378	1.07969	1.04559	1.00889	1.01559	1.04914	1.0973	1.05887	1.05941	1.13336	1.1713	1.1229	1.11164	1.07602	1.08148	1.11888	1.09933	1.10958	1.12625	1.17604	1.13105	1.12681	1.14573	1.16121	1.178	1.19072	1.14391	1.17434	1.2804	1.32527	1.35716	1.48711	1.55664	1.67156	1.72731	1.83348	1.79188	1.78976	1.78456	1.64861	1.72615	1.66742	1.60795	1.60849	1.60206
1.2173	1.20166	1.12668	1.08482	0.999513	1.06783	1.10814	1.1	1.06646	1.19773	1.15156	1.21541	1.2134	1.22723	1.22932	1.22905	1.21369	1.17594	1.23948	1.23743	1.23452	1.2643	1.12534	1.13921	1.12096	1.06379	1.07535	1.07738	1.08548	1.0682	1.11786	1.11528	1.09171	1.09863	1.20806	1.27165	1.25554	1.28862	1.27198	1.3085	1.30915	1.36393	1.42754	1.44915	1.51556	1.57316	1.58504	1.54183	1.53073	1.58503
0.873124	0.825673	0.839398	0.821445	0.841593	0.768289	0.784942	0.682179	0.665511	0.673969	0.691108	0.659334	0.684485	0.666899	0.634193	0.631542	0.59314	0.632631	0.605304	0.667387	0.714658	0.698468	0.667661	0.651686	0.651404	0.652914	0.668747	0.691149	0.661594	0.680988	0.713287	0.690015	0.717885	0.833938	0.875009	0.984379	1.0464	1.11057	1.09437	1.0518	1.04407	1.02319	1.05906	0.924387	0.912884	0.972596	0.941486	1.00755	0.983288	0.90353
1.35978	1.34118	1.43153	1.4027	1.37189	1.44332	1.43561	1.32064	1.46948	1.46976	1.5097	1.5724	1.52725	1.64873	1.60516	1.46036	1.43039	1.43556	1.5378	1.44666	1.45795	1.59217	1.68893	1.42304	1.49852	1.44423	1.61985	1.32924	1.35616	1.61898	1.33725	1.31152	1.66557	1.62963	1.55783	1.62999	1.60289	1.79252	1.59684	1.51859	1.51724	1.54944	1.7496	1.69768	1.68183	1.60302	1.55833	1.52656	1.47858	1.60771
0.696867	0.672125	0.642349	0.676145	0.702272	0.846207	1.01349	1.04414	1.09496	1.05007	1.12703	1.21633	1.1809	1.00917	1.0248	0.858	0.93731	1.02753	0.920031	1.06648	0.81962	0.852097	0.92582	0.898385	0.820963	0.938649	0.839408	0.771619	0.960643	1.11037	1.04836	1.12458	1.15321	1.34073	1.58657	1.80923	1.99008	2.05643	1.95941	2.12343	2.07611	1.95974	1.88009	1.93775	2.08328	1.86978	1.85825	1.71598	1.56853	1.52348
0.976485	0.971712	1.34413	1.42496	1.39202	1.32897	1.29651	1.26892	1.13887	1.0268	0.938121	0.874931	0.79756	0.844343	0.827219	0.767517	0.821898	0.756774	0.72286	0.762642	0.719861	0.712088	0.747564	0.705194	0.727324	0.744473	0.795246	0.81094	0.767841	0.84936	0.873017	0.838176	0.855423	0.901133	1.03881	1.13787	1.27523	1.22721	1.22873	0.979332	1.08951	1.19038	1.1646	1.18723	1.21277	1.19964	1.06631	1.0964	1	0.702149
1.0742	1.07751	0.898878	0.969023	1.34009	1.10586	1.27794	1.108	1.3707	1.61036	1.73572	1.57844	1.61022	1.48857	1.34869	1.46487	1.42264	1.42746	1.49709	1.44049	1.23527	1.16772	1.21843	1.34474	1.38788	1.90991	1.98842	1.13133	1.01452	0.997025	1.14203	1.33001	1.03612	1.1434	1.51105	1.70917	1.36964	1.32232	1.21394	1.2193	1.38834	1.50073	1.65652	1.62465	1.50185	1.37904	1.32162	1.11925	1.11765	1.25412
0.875	0.906668	0.852804	0.721637	0.705955	0.74684	0.768128	0.733969	0.719785	0.722668	0.646004	0.688686	0.625284	0.613261	0.587074	0.564112	0.571926	0.567758	0.632585	0.626496	0.589595	0.575128	0.566764	0.533572	0.53116	0.756978	0.758921	0.743105	0.626566	0.78648	0.784401	0.688569	0.783331	0.602798	0.609455	0.7228	0.737891	0.656129	0.620134	1.02591	1.18048	1.22858	1.21925	1.20991	1.56626	1.48854	1.91619	1.93284	2.04271	2.04063
0.952376	0.990082	0.975	0.996302	0.909918	0.8993	0.813796	0.889961	0.836683	0.775174	0.784761	0.813039	0.844464	0.736445	0.692052	0.782984	0.749277	0.704096	0.718666	0.717781	0.687175	0.696264	0.717257	0.719045	0.702932	0.736648	0.753614	0.777431	0.879803	0.817615	0.821231	0.849117	1.07951	1.11075	0.356583	0.294934	0.244374	0.216325	0.192778	0.603594	1.01441	1.42523	1.52446	2.02763	2.14405	2.09579	2.06958	2.14413	2.37755	1.92856
0.70804	0.694449	0.769311	0.70154	0.806023	0.9184	0.946126	1.019	1.0272	1.037	0.932533	1.00307	0.950021	0.913234	0.924461	0.883659	0.874433	0.786986	0.852898	0.772812	0.735518	0.708167	0.720824	0.705285	0.838637	0.770898	0.746029	0.695863	0.792901	0.738545	0.957677	0.968525	0.979373	0.989206	0.980936	0.889538	0.76337	0.874466	0.931246	1.08484	1.12863	1.14247	1.08684	1.13448	1.12818	1.14071	1.14372	1.20644	1.34297	1.62186
1.70375	1.51002	1.7762	1.76123	1.56188	1.6389	1.57619	1.58912	1.60362	1.51845	1.59197	1.58231	1.44851	1.53259	1.4313	1.49728	1.53104	1.68688	1.50864	1.47577	1.46762	1.46769	1.5353	1.52707	1.50994	1.55896	1.56884	1.46502	1.62349	1.42683	1.23016	1.39627	1.40622	1.34341	1.40086	1.53846	1.39418	1.4221	1.42655	1.26864	1.16555	1.22084	1.28543	1.34108	1.32284	1.24773	1.52863	1.42219	1.40836	1.57741
1.50057	1.51146	1.55134	1.4242	1.5322	1.30729	1.41421	1.31207	1.31084	1.41947	1.49451	1.60929	1.5603	1.50373	1.51091	1.56646	1.44841	1.52359	1.5191	1.48181	1.56652	1.70962	1.70558	1.77596	1.87884	1.86021	1.79952	1.35576	1.42749	1.23634	1.04519	1.07612	1.20391	1.29484	1.17241	1.18126	1.28301	1.31265	1.30226	1.23567	1.20005	1.22243	1.21236	1.18547	1.15679	1.16246	1.22272	1.10216	1.11261	1.25648
0.925516	0.827583	0.877746	0.800717	0.749861	0.707335	0.829107	0.759298	0.647987	0.714547	0.767365	0.840007	0.781219	0.714222	0.718439	0.731857	0.762144	0.707761	0.65116	0.61641	0.631907	0.760175	0.902955	0.803385	0.841389	0.921197	1.24849	1.4767	1.28417	0.906492	0.733081	0.836879	1.24268	1.23251	1.24294	1.14579	0.985685	1.21778	1.46645	1.54226	2.38196	2.29411	2.205	2.21982	2.23724	2.22344	2.15606	1.99813	1.93845	1.74868
1.03176	0.990722	1.06968	0.978884	1.02579	1.04894	0.984842	0.987452	1.04125	1.00378	1.01886	0.975706	1.00476	1.02708	1.06626	1.11973	1.04749	1.10153	1.12609	1.2045	1.12805	1.15812	1.27429	1.46874	1.27039	1.12647	1.01017	1.13196	1.05389	0.975813	0.975079	0.887453	0.920779	0.889064	0.903949	0.968207	1.01003	1.25492	1.20422	1.3136	1.3745	1.26966	1.2882	1.26468	1.24657	1.35831	1.37629	1.50925	1.50309	1.55397
0.785182	0.829824	0.799511	0.799677	0.827693	0.861879	0.8285	0.764058	0.813847	0.858924	0.92192	0.796742	0.846548	0.835323	0.883358	0.894634	0.906009	0.916542	0.839928	0.784974	0.83331	0.869156	0.819065	0.810361	0.82875	0.834396	0.829637	0.905282	0.780677	0.738464	0.764686	0.761637	0.773674	0.853714	0.852815	0.885939	0.726784	0.80523	0.774559	0.787873	0.802587	0.752949	0.733083	0.847011	0.889184	0.83027	0.822812	0.862219	0.927489	0.849678
0.98268	0.99222	0.946978	0.887737	0.980951	0.949212	0.972154	0.965711	0.964252	0.882398	0.868558	0.89178	0.893624	0.962692	1.04679	1.02289	1.0625	1.00198	1.01968	1.00956	0.988048	0.982304	0.907762	0.93589	0.958723	0.917619	0.984031	0.948931	1.0213	1.00857	0.963687	1.03141	1.03851	1.14517	1.08232	1.15972	1.17589	1.17616	1.22087	1.23202	1.29842	1.27597	1.23715	1.314	1.24786	1.26981	1.16751	1.07769	1.11837	1.16805
1.26866	1.24867	1.28792	1.3274	1.2401	1.23309	1.1612	1.11206	1.11752	0.992683	0.894461	0.793006	0.892417	1.10532	0.744306	0.754806	0.804129	1.34828	1.31222	1.26673	1.28414	1.42371	1.3552	1.36751	1.36432	1.34574	1.47658	1.40367	1.37982	1.38511	1.4309	1.38207	1.329	1.26733	1.33913	1.35022	1.34362	1.371	1.25229	1.32711	1.33595	1.30407	1.34876	1.33557	1.24612	1.28516	1.32337	1.34828	1.35328	1.4222
1.36258	1.30669	1.3291	1.3367	1.26482	1.35414	1.31205	1.33824	1.32305	1.35489	1.29978	1.37962	1.37061	1.38618	1.37994	1.38991	1.37879	1.23924	1.33449	1.36323	1.27518	1.36162	1.27389	1.29254	1.28711	1.27132	1.31962	1.35484	1.42652	1.50411	1.48363	1.57022	1.55834	1.51722	1.51446	1.52763	1.48796	1.73219	1.62197	1.41235	1.34218	1.42836	1.42034	1.26596	1.27239	1.23184	1.4436	1.42604	1.49682	1.48654
1.08673	1.03178	1.06999	1.03699	1.0015	1.03712	1.03667	1.06407	1.12898	1.12485	1.1801	1.14068	1.19216	1.24038	1.20045	1.27913	1.14507	1.22063	1.19857	1.18589	1.243	1.23677	1.20295	1.30022	1.26005	1.20444	1.03867	1.03232	1.10393	1.08589	1.05239	1.11465	1.39286	1.27957	1.32799	1.37281	1.4598	1.44823	1.49571	1.38692	1.30514	1.42433	1.47609	1.53906	1.54008	1.53759	1.71537	1.68706	1.69765	1.89172
1.17834	1.24209	1.21253	1.28557	1.34469	1.31053	1.41167	1.35129	1.34112	1.2916	1.34569	1.27989	1.29012	1.19253	1.29671	1.26773	1.26479	1.37525	1.26285	1.30384	1.3617	1.29756	1.28111	1.32208	1.47373	1.25028	1.23162	1.21314	1.16968	1.42753	1.30735	1.12349	1.22708	1.26216	1.39513	1.33635	1.31526	1.27151	1.22404	1.27247	1.31996	1.32355	1.25749	1.25305	1.18363	1.16202	1.16432	1.16618	1.07853	1.19364
2.35092	2.06704	2.28906	1.93973	1.73052	1.64126	1.5539	1.25181	1.01783	1.08982	1.01054	1.14341	1.17876	1.25439	1.5607	1.29783	0.971168	1.0035	0.96741	0.986996	0.962688	0.961286	1.0612	1.044	1.00055	0.978895	1.14289	1.19221	1.1419	1.21336	1.2675	1.24935	1.34957	1.4834	1.53109	1.83776	1.84539	1.75561	1.67239	1.65978	1.86639	1.46023	1.33419	1.38711	1.56543	1.25355	1.39869	1.35372	1.27456	1.25723
1.16515	1.07106	1.13775	1.08975	1.08667	1.11013	1.12511	1.11189	1.08567	1.13081	1.10548	1.06358	1.03671	1.06121	1.07421	1.06551	1.12547	1.12853	1.15458	1.12827	1.10958	1.14555	1.17181	1.18613	1.18545	1.18674	1.17304	1.19375	1.18277	1.22239	1.17247	1.18631	1.17953	1.27226	1.34707	1.3717	1.42203	1.54486	1.57117	1.49785	1.49685	1.51319	1.53062	1.55507	1.57504	1.57066	1.50276	1.50192	1.43946	1.44162
1.2644	1.17078	1.1364	1.15394	1.09209	1.04153	1.10352	1.05287	0.994725	0.996765	0.926923	0.957667	0.981638	0.940732	1.02166	0.954422	0.948377	0.922144	0.89181	0.901439	0.895435	0.872679	0.898841	0.869447	0.938529	0.938979	0.922678	0.891361	0.936304	0.993267	0.935072	0.875089	0.890308	0.936294	0.938743	1.03537	1.16777	1.19776	1.27261	1.27315	1.19355	1.1659	1.17118	1.22188	1.09532	1.02518	1.01363	1.15232	1.1474	1.09724
0.876491	0.922422	0.927871	1.06061	1.85427	1.76548	1.5359	1.60779	1.55974	1.4324	1.37837	1.30458	1.38499	1.48351	1.37682	1.45296	1.34546	1.61579	1.88026	1.34435	1.97489	2.58505	1.66448	2.13378	2.21652	2.05897	1.32087	1.05624	1.02612	1.09246	1.04254	1.00292	1.06395	1.87203	2.21879	2.31518	1.60252	2.41597	2.04328	2.23631	1.78089	1.48559	1.50242	1.55169	1.60599	1.63995	1.74198	1.93606	1.75587	1.84838
0.5782	0.607192	0.649989	0.741807	0.690205	0.716224	0.719918	0.771088	0.792089	0.770681	0.844846	0.781601	0.799548	0.839195	0.838203	0.800775	0.796333	0.859953	0.876828	0.869377	0.811845	0.803023	0.754198	0.783898	0.724406	0.701647	0.778204	0.699395	0.748175	0.72603	0.762627	0.788444	0.872594	0.933161	0.966657	0.944741	0.975035	1.09339	1.07209	1.04912	1.04008	1.10101	1.23704	1.21515	1.24869	1.17658	1.12109	1.06409	1.16553	1.10132
0.804605	0.842439	0.742365	0.738113	0.708412	0.701612	0.762859	0.733748	0.756397	0.73038	0.734194	0.666537	0.625159	0.643263	0.592179	0.573259	0.594678	0.57018	0.570645	0.567342	0.578589	0.585423	0.586626	0.579768	0.597664	0.582437	0.637554	0.59623	0.575408	0.576575	0.582105	0.635373	0.714914	0.767763	0.822916	0.82971	0.874463	0.872192	0.887698	0.947959	0.926633	0.964582	1.07994	1.05923	1.02507	0.978715	1.01267	1.04066	1.02526	1.1387
1.32472	1.15521	1.08473	0.913634	0.791266	0.875318	0.960224	0.915197	0.958864	1.1282	1.18694	1.08819	0.923972	0.881435	1.05424	1.04677	1.15207	1.19524	1.22843	1.15795	0.958956	0.96437	0.907404	1.02638	1.0373	0.955997	1.09222	1.09044	1.29955	1.33947	1.03092	1.02369	1.32072	1.41288	1.39662	1.10984	1.09869	1.15545	1.15477	1.23714	1.22631	1.46454	1.61547	1.51284	1.50362	1.54997	1.58354	1.6091	1.51904	1.39231
1.44091	1.42866	1.4431	1.33355	1.27684	1.2032	1.1779	1.06693	1.04232	1.06218	1.00126	0.974565	1.02288	1.08358	1.15549	1.15936	1.21933	1.1591	1.26539	1.19404	1.21328	1.09977	1.10664	0.969383	0.998139	1.022	1.08974	1.08124	1.12717	1.09734	1.07389	1.07055	1.12174	1.10282	1.13323	1.16952	1.20611	1.21722	1.2214	1.22559	1.22978	1.16567	1.22651	1.05365	1.04065	1.01176	0.990459	1.03329	1.04943	1.09966
1.44059	1.3595	1.32822	1.28768	1.30247	1.34027	1.32076	1.3542	1.30538	1.35299	1.32115	1.31044	1.27167	1.26527	1.33859	1.26151	1.28438	1.25639	1.29541	1.21028	1.17909	1.19433	1.30069	1.14135	1.17923	1.29902	1.34607	1.38055	1.33871	1.49962	1.39176	1.358	1.60389	1.68781	1.71606	1.84305	1.94741	2.17738	1.80946	1.68743	1.5318	1.57932	1.39138	1.28579	1.30988	1.79103	1.67824	1.52479	1.48576	1.52634
0.964622	0.995287	1.04414	1.09493	1.0706	1.13622	1.11525	1.13174	1.10615	1.12717	1.07967	1.10799	1.05667	1.146	1.1156	1.07303	1.04329	1.05506	1.08003	1.09224	1.07495	1.12659	1.16909	1.10334	1.15647	1.1646	1.16245	1.18849	1.15491	1.14126	1.16837	1.14014	1.16978	1.4069	1.53883	1.49759	1.5743	1.65735	1.82308	1.86449	1.95968	1.90175	1.86115	1.96175	1.94598	2.15841	2.17818	2.25027	2.16309	2.08754
0.817501	0.812789	0.84148	0.797656	0.778088	0.755796	0.759708	0.833225	0.787084	0.821489	0.802548	0.818039	0.827123	0.762355	0.767451	0.72814	0.741197	0.736142	0.682266	0.735797	0.782019	0.749672	0.705697	0.733411	0.729221	0.742481	0.747027	0.777347	0.771061	0.823914	0.77581	0.778954	0.839492	1.00894	1.1323	1.14207	1.17394	1.19716	1.13859	1.23418	1.33809	1.29853	1.32085	1.32105	1.40589	1.30285	1.35388	1.31623	1.34797	1.37691
0.871846	0.869665	0.813636	0.797663	0.779447	0.80764	0.813704	0.779915	0.784579	0.812683	0.753438	0.739209	0.751903	0.734996	0.74836	0.757367	0.800065	0.795923	0.775872	0.75908	0.839331	0.858105	0.875528	0.944199	0.942382	0.995359	1.05479	0.999376	1.00862	0.97038	1.0236	1.0171	1.03049	1.17272	1.28375	1.42195	1.53741	1.56982	1.58941	1.72853	1.74013	1.64024	1.69444	1.71144	1.71856	1.85749	2.09723	2.13156	2.13604	2.15826
1.76158	1.72578	1.66673	1.65425	1.59096	1.51223	1.50855	1.44857	1.25009	1.28307	1.32624	1.50501	1.52563	1.52969	1.51339	1.43085	1.47438	1.52445	1.50532	1.47284	1.35235	1.37435	1.51595	1.45185	1.46601	1.53329	1.56058	1.58183	1.46151	1.53038	1.44435	1.48585	1.42573	1.49054	1.39546	1.45936	1.511	1.47682	1.6667	1.62876	1.68125	1.78467	1.84515	1.86218	1.86759	1.78946	1.81285	1.67434	1.64967	1.64256
1.07908	1.08765	1.05941	1.06375	1.08398	1.10271	1.17442	1.09605	1.13901	1.16851	1.20486	1.24132	1.28808	1.31684	1.28016	1.27722	1.26651	1.2183	1.1791	1.24655	1.3269	1.37517	1.35169	1.35677	1.30721	1.35779	1.33305	1.31908	1.20553	1.19201	1.29893	1.17216	1.18269	1.34285	1.44318	1.34349	1.47456	1.58151	1.68538	1.78391	1.8808	1.82155	1.81259	1.76989	1.68171	1.62468	1.6157	1.54328	1.59814	1.61162
0.816628	0.807819	0.746421	0.66187	0.660204	0.64076	0.679298	0.743461	0.827421	0.872623	0.79429	0.771778	0.800257	0.690709	0.695703	0.64837	0.658926	0.656882	0.698173	0.72982	0.695409	0.633297	0.724758	0.709016	0.733349	0.751317	0.746249	0.725001	0.793418	0.692465	0.639386	0.648357	0.597048	0.628764	0.65833	0.623383	0.702565	0.727698	0.715786	0.769806	0.766636	0.786006	0.828369	0.869204	0.902409	0.914756	1.04195	1.03856	0.989807	0.902343
1.95549	1.69395	1.69637	1.68161	1.77745	1.57677	1.29909	1.13481	1.16344	1.16246	1.19495	1.23691	1.37886	1.35087	1.50108	1.48588	1.63096	1.41537	1.52291	1.65564	1.66232	1.70338	1.72247	1.77787	1.64217	1.85378	1.94185	2.03522	2.09225	1.7001	1.66653	1.50038	1.47592	1.2822	1.29543	1.28609	1.2312	1.23049	1.31038	1.44749	1.6785	1.41129	1.48975	1.54587	1.51605	1.52644	1.66893	1.71428	1.7644	1.79032
0.715724	0.729604	0.794491	0.817428	0.818095	0.754921	0.754579	0.711877	0.782753	0.745762	0.682158	0.678436	0.749915	0.634037	0.655718	0.628754	0.619712	0.657279	0.68152	0.665417	0.721505	0.714828	0.70844	0.74315	0.705875	0.692831	0.716847	0.734335	0.717835	0.683043	0.687834	0.692332	0.714608	0.844036	0.903635	0.953453	0.982209	1.05273	1.11219	1.05854	1.10477	1.07983	1.15669	1.1551	1.17502	1.19829	1.12278	1.04947	1.04624	0.997656
1.61108	1.56813	1.61395	1.59689	1.67496	1.67521	1.74509	1.7535	1.61869	1.7485	1.8218	1.46996	1.63599	1.99686	2.01379	2.00263	1.89393	1.80329	1.63405	1.57538	1.86202	1.68445	1.6134	1.55142	1.44389	1.60354	1.34367	1.17573	1.16403	1.2034	1.36206	1.18612	1.1182	1.32315	1.28378	1.49609	1.54084	1.6363	1.69571	1.47691	1.61961	1.68192	1.55219	1.65729	1.64844	1.66055	1.78288	1.70576	1.78995	1.89965
0.684506	0.702646	0.713328	0.70059	0.712031	0.681363	0.670105	0.661333	0.682324	0.696416	0.698927	0.717721	0.662149	0.662435	0.733622	0.673509	0.668025	0.62618	0.672542	0.660257	0.655635	0.719279	0.725142	0.720808	0.685596	0.680557	0.710342	0.681407	0.735154	0.726498	0.742636	0.714466	0.774352	0.788525	0.809473	0.864355	0.910724	0.999591	1.12093	1.12885	1.08863	1.06502	1.02012	1.0514	0.979795	0.941351	1.00903	0.993345	1.0232	0.93064
1.03301	1.05423	1.08465	1.02484	1.02674	1.0537	1.06079	1.01758	0.995392	0.998852	1.08056	1.05119	1.10568	1.05019	1.06756	1.03837	1.01897	1.02419	1.0435	0.975766	0.920061	0.929323	0.895913	0.94151	0.954689	0.970803	0.969536	0.935523	1.05777	0.94627	0.976332	0.9823	1.10886	1.29512	1.19227	1.19364	1.27165	1.22376	1.32821	1.36743	1.38434	1.41714	1.41835	1.32871	1.29324	1.23629	1.34355	1.39678	1.22636	1.17951
1.40342	1.33978	1.18027	1.26791	1.06978	1.18119	1.16896	1.19634	1.30908	1.10203	1.31307	1.27447	1.28619	1.35853	1.33715	1.27963	1.0058	1.4053	1.30195	0.991502	1.00497	1.02681	0.982537	0.979504	0.923377	0.862706	0.868061	0.934956	0.915459	0.976861	1.07121	1.13334	1.17287	1.23325	1.20945	1.22703	1.26594	1.23325	1.21085	1.0759	1.12696	1.05703	1.19843	1.18706	1.12394	1.13928	1.16367	1.13116	1.16248	1.22108
0.983404	1.02157	1.02318	0.943545	0.956963	1.06981	1.07116	0.970627	0.949207	0.941828	0.849556	0.907406	0.940301	0.877828	0.942007	0.98257	1.01074	1.03566	0.990715	1.04061	0.985334	0.989779	0.880685	0.92408	0.928304	0.972985	1.03295	1.00094	0.936229	0.949551	1.0077	1.05929	1.15067	1.23678	1.29007	1.425	1.43792	1.45897	1.43067	1.45273	1.67741	1.56995	1.56387	1.50316	1.51327	1.65494	1.61453	1.57411	1.572	1.54561
0.902419	0.844888	0.956641	0.904276	0.858298	0.897144	0.857981	0.771878	0.818342	0.827039	0.842269	0.791003	0.787001	0.812969	0.865013	0.857567	0.827499	0.782219	0.820262	0.75481	0.775065	0.779222	0.817054	0.776688	0.801283	0.758699	0.798083	0.782884	0.776174	0.794267	0.817587	0.799068	0.825995	0.937224	0.988201	1.02222	0.940718	0.990302	1.10592	1.22431	1.20394	1.23305	1.29897	1.32265	1.38807	1.3986	1.35456	1.15709	1.21269	1.10353
0.952246	0.877211	0.971855	0.885471	0.83928	0.99848	1.05404	1.01315	1.17538	1.22704	1.23693	1.09913	1.00654	0.997555	0.866584	0.974257	0.936759	0.947159	0.972016	1.38345	0.968745	0.988355	0.965617	1.02072	0.991756	1.10156	1.11503	1.00445	1.02821	0.958712	0.900345	0.831465	0.989139	1.05939	1.07226	1.08686	1.10963	1.25433	1.19992	1.19902	1.30142	1.46261	1.44673	1.51414	1.47253	1.40087	1.48145	1.46626	1.50338	1.6735
0.818495	0.867489	0.858714	0.849214	0.920294	0.833031	0.838042	0.864852	0.799627	0.71747	0.844643	0.916955	0.886729	0.946351	0.878237	0.93198	1.0264	0.979221	0.830778	0.749711	0.748127	0.851709	0.918046	0.988585	0.952181	1.01262	1.05065	1.08938	1.05207	1.09971	1.10335	1.13324	1.15827	1.23709	1.38584	1.44235	1.64235	1.70719	1.8238	1.66914	1.67522	1.55603	1.66952	1.74759	1.65075	1.95785	1.68003	1.46691	1.81487	1.65443
1.46746	1.38834	1.48431	1.34299	1.34411	1.38103	1.36267	1.39021	1.3254	1.41802	1.41404	1.46671	1.27199	1.24192	1.29614	1.28207	1.09572	1.01938	1.08458	1.11955	1.2103	1.23934	1.21416	1.13041	1.13067	1.07374	1.11207	1.09329	1.06469	1.07221	1.06733	1.05105	1.11759	1.12089	1.25911	1.27838	1.31913	1.36574	1.30827	1.28834	1.32542	1.28524	1.46519	1.56947	1.56924	1.52453	1.66367	1.67786	1.64571	1.56814
1.04381	1.03656	1.11993	0.98269	0.981044	0.92635	0.868758	0.867034	0.888809	0.880239	0.866242	0.943045	1.00211	0.984027	1.04042	1.05327	1.04134	1.03607	1.08539	1.12692	1.17216	1.12673	1.19605	1.12977	1.14873	1.17322	1.17292	1.16021	1.22552	1.24466	1.23011	1.24116	1.22272	1.38186	1.43265	1.405	1.3125	1.48967	1.5242	1.59281	1.50917	1.52468	1.43486	1.5021	1.36689	1.46256	1.59801	1.43005	1.50083	1.4153
0.745933	0.791007	0.780261	0.773138	0.795966	0.713705	0.624004	0.622406	0.672938	0.72326	0.753153	0.738399	0.723469	0.732526	0.745949	0.784489	0.969877	0.994221	0.840739	0.859053	0.997857	1.08875	1.08803	1.02078	1.06963	1.00765	0.98821	0.690932	0.707222	0.734707	0.756047	1.0412	0.759312	0.952254	1.87053	1.97262	1.98628	2.03962	2.01795	2.06207	1.96847	1.27494	1.40147	1.27557	1.33795	1.26655	1.30398	1.31019	1.34031	1.80859
1.96265	1.79407	1.85058	1.90934	1.89926	1.9694	1.87482	1.94455	1.91913	1.87321	1.99797	2.03999	1.86321	1.75454	1.85545	1.88075	1.80731	1.73552	1.76155	1.7951	1.79619	1.90597	1.8927	1.98439	1.82943	1.9334	2.04485	2.01919	2.12106	2.06501	2.12721	2.06645	1.96931	1.91433	1.88791	2.09061	1.90976	1.86954	1.90793	1.98375	1.83119	1.77936	1.80832	1.9046	1.89669	1.90201	1.80087	1.89015	1.81341	1.87058
0.814267	0.815647	0.83738	0.753314	0.842265	0.883223	0.897419	0.884525	0.948709	1.0059	1.02365	0.98644	1.02017	0.981612	1.05976	1.0189	1.05712	1.03407	1.04417	1.00785	0.976298	1.00927	0.998272	1.00904	1.03698	1.07483	1.07058	1.00029	0.976136	0.978588	1.02402	1.08029	1.14232	1.22593	1.26907	1.31449	1.41632	1.54099	1.71086	1.70753	1.78701	1.6204	1.65673	1.7304	1.77006	1.67973	1.74791	1.67501	1.52859	1.5713
1.15116	1.05369	1.05249	0.93737	0.893657	0.919783	0.909829	0.937586	0.961518	0.951968	0.913729	0.916678	0.888717	0.87591	0.939578	1.01414	1.03515	0.991916	1.03939	1.03861	1.07146	1.01423	1.03924	1.01739	0.953642	0.994687	1.03579	1.05889	1.0123	1.00909	1.06286	1.00637	1.02383	0.965785	1.03286	1.03842	0.997097	1.05939	1.10609	1.11824	1.07988	1.13681	1.13196	1.06392	1.1081	1.09066	1.12177	1.0809	1.09685	1.14415
1.70679	1.53528	1.79547	1.66958	1.63294	1.56799	1.85556	1.6134	1.8313	1.76239	1.754	1.65678	1.89227	1.66094	1.65791	1.65656	1.71965	1.85888	1.72848	1.7036	1.84514	1.83033	1.78842	1.69003	1.74905	1.72398	1.85887	1.58357	1.59452	1.6988	1.60705	1.70041	1.63441	1.5469	1.6403	1.80062	1.60004	1.75895	1.9312	1.61992	1.84212	1.75889	1.79686	1.83387	1.81074	1.92495	1.88131	1.85626	1.85123	1.79525
0.773026	0.785564	0.832852	0.881113	0.84586	0.831032	0.859314	0.802192	0.862711	0.83599	0.823208	0.947098	0.978751	1.04521	1.04296	1.07452	0.990447	0.859624	0.880303	0.938524	0.922979	0.970396	0.932176	0.812369	0.736603	0.69897	0.69444	0.584749	0.787998	0.852065	0.88912	0.715271	0.832196	0.907398	1.0027	1.0121	1.04823	1.07751	1.11691	1.2106	1.13985	1.16557	1.24816	1.18033	1.17248	1.15454	1.14952	1.16484	1.07559	1.19781
0.633967	0.627592	0.61833	0.630909	0.647463	0.672348	0.632592	0.702807	0.737965	0.772887	0.835741	0.756909	0.741133	0.683122	0.847568	0.850601	0.838388	0.776912	0.704128	0.65658	0.673725	0.697688	0.712748	0.765409	0.704353	0.718449	0.738746	0.795378	0.775373	0.804278	0.764844	0.73194	0.708582	0.642902	0.597601	0.637565	0.535166	0.539042	0.571463	0.549492	0.544602	0.507008	0.490878	0.490211	0.466224	0.415856	0.414462	0.420309	0.407365	0.457783
0.983701	0.973229	0.961218	0.951811	0.925602	0.97867	0.952834	0.878883	0.811778	0.896754	0.810588	0.834989	0.870827	0.824959	0.906227	0.898033	0.986445	0.973344	0.94121	0.895193	0.885767	0.912485	0.928979	0.896447	0.965743	0.89314	0.853608	0.880198	0.93009	0.892575	0.947341	0.981313	1.00344	1.1897	1.34771	1.26919	1.3433	1.30815	1.28727	1.28541	1.34287	1.43029	1.38768	1.37642	1.50079	1.47968	1.59408	1.50209	1.50438	1.48308
2.14784	1.7893	1.727	1.73938	1.78938	1.93287	1.80547	1.42718	1.35252	1.43701	1.59843	1.43581	1.44222	1.39559	1.48465	1.40641	1.39476	1.37071	1.3133	1.34174	1.32627	1.33169	1.27188	1.36867	1.32044	1.28515	1.49225	1.28246	1.40039	1.31226	1.2508	1.35806	1.52235	1.52753	1.47817	1.63662	1.56239	1.69649	1.77058	1.71915	1.76685	1.66974	1.83364	1.7901	1.87351	1.79339	1.78022	1.8507	1.83196	1.88166
0.713238	0.639003	0.696392	0.674817	0.676044	0.711189	0.715068	0.727082	0.731872	0.761578	0.765736	0.796284	0.748987	0.752884	0.786863	0.7772	0.787684	0.794712	0.776807	0.778562	0.756143	0.719556	0.761223	0.786798	0.7853	0.772986	0.822021	0.805243	0.802683	0.838636	0.854845	0.828061	0.885698	0.955859	1.06117	1.09964	1.15782	1.15853	1.18684	1.18588	1.29191	1.3766	1.43135	1.47677	1.40992	1.48953	1.40814	1.33923	1.34066	1.34589
0.801747	0.812573	0.795262	0.875141	0.903123	0.921807	0.89906	0.925596	0.945811	0.947585	0.986782	0.957734	0.935746	0.935106	1.0033	1.08732	1.13616	1.07886	1.03502	1.06902	1.04722	0.995607	0.96176	0.936967	0.982541	0.968021	1.01733	1.00951	1.08736	1.06802	1.11266	1.11399	1.25355	1.36584	1.50751	1.60929	1.63094	1.67203	1.77214	1.83944	1.7977	1.77716	1.84932	1.68308	1.64675	1.62287	1.59191	1.5355	1.47151	1.51534
0.994595	0.90165	0.981624	0.92359	0.876515	0.852424	0.871881	0.83411	0.839063	0.812911	0.821456	0.82418	0.795829	0.889608	0.904923	0.923175	0.90159	0.87644	0.922157	0.894485	0.833514	0.867485	0.828917	0.857381	0.883109	0.847521	0.841389	0.814447	0.831362	0.844302	0.808958	0.843608	0.869916	0.981471	1.01325	0.994808	1.07145	1.11318	1.07303	1.12687	1.09122	1.07791	1.0826	0.997004	1.02045	1.01677	0.969305	0.972962	0.974927	0.98656
0.862409	0.923738	0.898426	0.946059	0.928037	0.981955	0.956692	0.996563	0.968558	0.978731	0.921786	0.95854	0.91053	0.875848	0.961172	0.886262	0.901662	0.871114	0.836642	0.766882	0.82557	0.826517	0.925601	0.847238	0.882976	0.912579	0.877297	0.856279	0.864198	0.848718	0.808225	0.826504	0.885234	0.971735	1.05184	1.08637	1.0916	1.12236	1.17047	1.30191	1.21045	1.30377	1.3821	1.4866	1.46316	1.60315	1.50473	1.48629	1.68131	1.54398
0.460313	0.476379	0.339951	0.453587	0.350725	0.488503	0.446372	0.41506	0.478815	0.545371	0.522132	0.573006	0.629685	0.589444	0.634614	0.749555	0.825861	0.951492	0.883017	0.695158	0.741949	0.775852	0.727899	0.671312	0.793732	0.809228	0.860324	0.868167	0.844202	1.10351	1.1874	1.11007	1.52176	1.79614	1.82159	1.46682	1.57424	1.52441	1.26675	1.20797	0.991919	0.726349	0.802018	0.92799	1.18786	1.43922	1.54799	1.72728	1.53502	1.65372
0.937411	0.946592	0.971847	0.972204	0.974029	0.96302	0.973543	0.946785	0.965197	0.979755	0.941639	0.962691	0.94108	0.900322	0.876141	0.906497	0.983312	0.966771	0.950212	0.906434	0.901026	1.01059	1.04722	1.00884	0.979729	0.958704	0.873358	0.857103	0.832523	0.849385	0.793715	0.785413	0.758049	0.82518	0.849725	0.834486	0.87002	0.932538	0.894554	0.892584	0.965841	0.935424	0.902837	0.933589	0.941945	0.965121	0.911049	0.860145	0.820176	0.824052
0.76883	0.703365	0.681701	0.730488	0.745553	0.756616	0.803214	0.815944	0.761215	0.816734	0.840729	0.745256	0.736	0.78347	0.809809	0.795822	0.863087	0.807718	0.814409	0.887659	0.825087	0.859984	0.92373	0.939845	0.930773	0.828445	0.938387	0.997392	0.996087	0.963778	0.993129	1.02964	1.13342	1.2533	1.24304	1.29258	1.38763	1.29478	1.38983	1.49751	1.75465	1.65886	1.7268	1.83227	1.88303	1.8968	1.9695	1.95585	1.91278	1.92729
1.5428	1.42337	1.52609	1.44831	1.3468	1.26066	1.29384	1.32433	1.4204	1.37083	1.21327	1.20149	1.23864	1.29881	1.32561	1.43825	1.2478	1.39274	1.32712	1.408	1.46429	1.40683	1.46715	1.37228	1.14169	1.15579	1.30103	1.39724	1.42182	1.58266	1.60833	1.75463	1.23977	1.5192	1.45464	1.50205	1.61155	1.76273	1.54353	1.61501	1.65458	1.63695	1.61521	1.69831	1.68076	1.6109	1.47046	2.31192	2.15764	1.42373
1.00454	1.03354	0.986104	0.997705	0.94825	1.08551	0.45476	0.632371	0.688431	0.803471	0.59463	1.21035	1.27998	1.23796	1.13851	1.09943	1.08688	1.02363	0.993812	0.905075	0.863337	0.859068	0.919936	0.918452	0.923785	0.946534	0.939568	0.966612	1.01319	1.01564	0.954122	0.90657	0.940715	1.07788	1.2719	1.28073	1.53721	1.52005	1.53185	1.37513	1.42345	1.43493	1.56859	1.71555	1.61449	1.42687	1.50283	1.55461	1.62068	1.72259
1.10307	1.09405	1.12347	1.10189	1.14439	1.10145	1.07281	1.061	1.12784	1.08345	1.06955	1.07788	1.07044	1.11743	1.05332	1.05304	1.05658	1.02304	0.970881	1.02828	0.996393	1.02079	1.0485	1.02866	1.0344	1.05133	1.01494	1.03961	1.07146	1.07216	1.10976	1.06967	1.15004	1.22156	1.33168	1.47034	1.47694	1.51248	1.48454	1.44182	1.35389	1.44616	1.45049	1.51415	1.39952	1.41792	1.48379	1.36697	1.45335	1.43648
0.67389	0.671792	0.696225	0.600499	0.62615	0.641982	0.615433	0.611017	0.556528	0.554888	0.553722	0.493135	0.46794	0.49702	0.490394	0.489818	0.518717	0.586451	0.668072	0.644123	0.64887	0.684367	0.641388	0.653038	0.645111	0.717021	0.749864	0.724063	0.723485	0.778247	0.748012	0.773484	0.832858	0.855956	1.05013	1.0495	1.05354	1.04908	1.13135	1.24525	1.20846	1.16107	1.18541	1.36939	1.37237	1.33406	1.30393	1.20928	1.21953	1.16495
1.18029	1.16065	1.23189	1.3284	1.19908	1.08408	1.00392	1.04601	1.09642	1.08184	1.15549	1.30841	1.27616	1.28031	1.56012	1.56076	1.09971	1.06718	1.20524	1.323	1.44077	1.55853	1.56117	1.60407	1.7964	1.79677	1.86126	1.74799	1.75318	1.6989	1.639	1.59726	1.45273	1.71255	1.66664	1.68809	1.73628	1.85633	1.87208	1.7741	1.83906	1.80543	1.86199	1.83516	1.80187	1.83282	1.91079	1.85486	1.66847	1.6369
0.752705	0.809692	0.767398	0.784467	0.841921	0.832543	0.827216	0.798157	0.824823	0.786144	0.782338	0.851609	0.761201	0.7364	0.784075	0.727303	0.769425	0.72547	0.726586	0.712271	0.766082	0.800434	0.783149	0.834828	0.821496	0.83338	0.820496	0.830926	0.821981	0.807941	0.787242	0.755251	0.875435	1.02742	1.12475	1.18777	1.18775	1.21421	1.26367	1.25273	1.27455	1.23432	1.22017	1.30709	1.25596	1.17797	1.20308	1.16518	1.19243	1.14278
1.41973	1.43422	1.4296	1.38592	1.34071	1.22756	1.326	1.2366	1.31127	1.3297	1.35436	1.50775	1.46154	1.55485	1.50436	1.39665	1.41181	1.43675	1.58624	1.59655	1.70126	1.64737	1.65189	1.60555	1.4804	1.52527	1.42682	1.39031	1.39599	1.19318	1.12169	1.14985	1.19651	1.238	1.28924	1.25345	1.34838	1.3104	1.20376	1.28479	1.25849	1.25874	1.26375	1.25683	1.37724	1.27563	1.3321	1.34483	1.31639	1.32365
1.12115	1.16449	1.17724	1.12155	1.17514	1.17203	1.0892	1.06885	1.02152	1.05223	1.07773	1.09918	1.03705	1.08182	1.03272	1.11987	1.11185	1.1669	1.21165	1.15067	1.11657	1.1334	1.15566	1.17233	1.13071	1.12285	1.09211	1.05668	1.21674	1.1239	1.13945	1.10511	1.16033	1.27436	1.28773	1.28934	1.30653	1.3822	1.3889	1.43093	1.43959	1.33401	1.42816	1.37098	1.40148	1.43864	1.37453	1.4303	1.40146	1.44998
1.05761	1.1414	1.01742	0.963008	1.13547	1.19397	0.935017	0.906334	0.854337	0.876206	0.820577	0.871234	0.798665	0.832208	0.853063	0.800011	0.820826	0.845264	0.791232	0.711685	0.714477	0.617894	0.618868	0.670047	0.708835	0.752163	0.840216	0.769286	0.929778	0.892324	0.909221	0.940555	0.909112	0.964571	0.963931	1.05781	1.04825	1.10244	1.13524	1.08765	1.04876	1.094	1.19252	1.24742	1.23234	1.16783	1.16905	1.11531	1.08409	1.01997
0.499522	0.428267	0.43278	0.463838	0.471809	0.495468	0.489554	0.466054	0.469877	0.502155	0.512698	0.578493	0.561383	0.592935	0.63547	0.608184	0.631149	0.619338	0.625063	0.62527	0.692407	0.675654	0.712783	0.73213	0.763964	0.727492	0.776103	0.778037	0.796483	0.754272	0.792021	0.846012	0.831516	0.89628	0.844361	0.847429	0.831322	0.865802	0.82803	0.851284	0.829505	0.846833	0.901158	0.907772	0.866432	0.922858	0.938344	0.885413	0.891855	0.909867
0.895724	0.89212	0.902355	0.86824	0.771495	0.809936	0.774607	0.749821	0.766822	0.822125	0.767315	0.772795	0.786635	0.796125	0.78857	0.789113	0.793869	0.787611	0.812333	0.7818	0.801117	0.804798	0.793424	0.848624	0.863149	0.831922	0.911368	0.885305	1.01365	0.832519	0.860027	0.85046	0.838536	0.859372	0.921746	0.946737	0.860713	0.961447	0.942776	0.92855	0.978787	0.954842	0.95548	0.934451	0.964247	0.950179	0.955013	0.977735	0.954622	0.949274
1.07155	1.07703	1.08802	1.10056	1.04472	1.05046	0.968007	1.03983	0.98893	0.945807	0.955296	0.966986	0.980581	0.911839	0.964127	0.966048	0.907746	0.96848	0.98397	0.948967	0.934255	0.985272	0.951312	0.995848	1.01229	1.00632	1.01911	0.96733	1.02331	0.935151	0.934652	0.902586	0.952959	1.05167	1.09313	1.09872	1.24026	1.32255	1.37066	1.39349	1.3632	1.30193	1.38395	1.35618	1.3284	1.38002	1.27277	1.33308	1.31717	1.25438
0.95754	0.956942	0.890795	0.841983	0.823065	0.789886	0.811314	0.777919	0.707835	0.677963	0.635462	0.569233	0.555588	0.571256	0.648702	0.575775	0.517237	0.501588	0.486268	0.492977	0.48557	0.478897	0.502254	0.590797	0.60022	0.621555	0.620852	0.651671	0.633745	0.663401	0.682572	0.696211	0.724231	0.816835	0.922351	1.09536	1.12062	1.26565	1.36464	1.38254	1.27573	1.35593	1.38194	1.48136	1.67992	1.68809	1.64238	1.57821	1.47101	1.72419
1.06595	1.02997	1.00352	0.927149	0.933343	0.86509	0.871173	0.863723	0.765622	0.806008	0.791268	0.754209	0.725472	0.764089	0.835936	0.750699	0.71149	0.74668	0.765816	0.769956	0.797196	0.818363	0.771697	0.782247	0.710348	0.705856	0.724263	0.693431	0.676627	0.691518	0.689571	0.73533	0.810467	0.784258	0.732848	0.779607	0.937544	1.00122	0.850266	0.835857	0.933266	0.982483	0.919359	0.858616	0.832933	0.784658	0.828692	0.842262	0.905967	0.929539
0.421472	0.471953	0.465365	0.455576	0.487144	0.569427	0.543523	0.609645	0.565751	0.646758	0.63191	0.588191	0.533698	0.527103	0.516137	0.535904	0.558477	0.652885	0.622036	0.654313	0.693389	0.724664	0.71876	0.727142	0.637778	0.58105	0.554043	0.523416	0.493273	0.502628	0.481225	0.480121	0.447161	0.501171	0.48887	0.498602	0.500938	0.492793	0.525691	0.541335	0.56896	0.615743	0.682522	0.656383	0.518169	0.427559	0.42896	0.481745	0.517916	0.520348
0.554688	0.559485	0.591527	0.567349	0.609119	0.603342	0.686877	0.72681	0.695551	0.736006	0.663735	0.689199	0.649296	0.710412	0.752903	0.778665	0.813565	0.839609	0.89587	0.912241	0.903899	0.864135	0.848996	0.796067	0.765165	0.744617	0.736604	0.695223	0.675371	0.692999	0.693241	0.674399	0.662575	0.807147	0.814871	0.943644	1.00761	1.03269	1.01657	0.99423	0.917096	0.854203	0.866561	0.824828	0.864971	0.795537	0.725647	0.818238	0.745633	0.771434
0.783906	0.75518	0.72277	0.737596	0.733768	0.822344	0.801648	0.791794	0.80742	0.790602	0.803755	0.805027	0.831979	0.850495	0.830051	0.810245	0.797186	0.78697	0.761196	0.728446	0.723061	0.706232	0.725076	0.701938	0.710593	0.717001	0.725306	0.716992	0.712275	0.694756	0.734976	0.723422	0.783512	0.854598	0.856866	0.854217	0.882004	0.929852	0.933294	0.943974	0.986359	1.03649	1.0681	1.02159	1.02473	1.08689	1.03009	1.08295	1.1502	1.14657
0.700947	0.676931	0.681779	0.719118	0.703995	0.683159	0.667231	0.665103	0.645117	0.660307	0.657676	0.679569	0.702971	0.658978	0.631345	0.622544	0.581421	0.570949	0.540091	0.573191	0.549841	0.528875	0.523532	0.515308	0.499338	0.47002	0.476094	0.447475	0.442515	0.45652	0.438873	0.439181	0.496015	0.50502	0.554249	0.614304	0.594079	0.613272	0.702151	0.724319	0.714224	0.73781	0.721657	0.719191	0.732687	0.742334	0.746311	0.76328	0.752985	0.782271
1.23692	1.13409	1.1588	1.16943	1.15075	1.21371	1.22306	1.21412	1.19419	1.11966	0.901871	0.96579	0.951384	1.14986	1.10829	1.0764	1.06494	0.987287	1.03015	1.00566	0.90193	0.912194	0.99971	1.03518	1.09078	1.15706	1.12015	1.15798	1.19544	1.16936	1.19584	1.24926	1.24529	1.25925	1.28052	1.32718	1.37278	1.36995	1.38912	1.48475	1.46386	1.39072	1.29822	1.32021	1.4673	1.49056	1.57503	1.48351	1.49643	1.50726
0.701472	0.724417	0.739746	0.719044	0.706355	0.686479	0.731898	0.783295	0.744409	0.775139	0.788386	0.783982	0.797934	0.840311	0.903463	0.896376	0.815303	0.708173	0.638224	0.682292	0.695493	0.709626	0.72223	0.689474	0.651276	0.571945	0.503679	0.494415	0.593215	0.546165	0.53411	0.498267	0.545873	0.700607	0.746766	0.863578	0.939958	0.996631	1.13227	1.07376	1.02197	0.988258	0.965695	1.02948	1.13429	1.08099	1.20142	1.24696	1.1334	1.17298
1.23142	1.14218	1.09389	1.04246	1.01679	1.00416	0.958259	0.986212	1.034	0.940289	0.931895	0.935627	0.92061	0.905273	0.931946	0.920426	0.917359	0.938394	0.929845	0.945752	0.886053	0.924848	0.987398	0.987189	1.02721	0.96996	1.07473	1.15409	1.13002	1.13875	1.12956	1.0799	1.0723	1.17533	1.17742	1.22415	1.27572	1.26058	1.44268	1.58068	1.60254	1.66317	1.60964	1.45233	1.707	1.69324	1.65935	1.50839	1.40989	1.34283
0.6552	0.673034	0.672405	0.65524	0.642706	0.645568	0.642334	0.642678	0.647332	0.632062	0.614209	0.591661	0.572331	0.600828	0.596644	0.582006	0.576094	0.571004	0.572569	0.635058	0.879844	0.666663	0.317259	0.221791	0.114244	0.195223	0.352572	0.51479	0.35446	0.628199	0.901938	0.988957	1.02824	0.971486	1.04346	0.981314	0.91007	0.875201	0.847681	0.811965	0.754125	0.796183	0.790814	0.804805	0.810428	0.786557	0.785865	0.767246	0.799404	0.80349
0.907586	0.996363	0.947123	0.915072	0.948551	0.913189	0.89387	0.908476	0.895688	0.893422	0.915147	0.891996	0.869027	0.87004	0.930932	0.863975	0.863004	0.894058	0.872241	0.891779	0.886244	0.907113	0.94318	0.929401	0.904882	0.897645	0.869142	0.962747	1.00264	1.01224	0.946578	0.957604	0.934986	1.11104	1.2295	1.21928	1.35962	1.45805	1.50727	1.43502	1.43276	1.4526	1.39444	1.50221	1.53514	1.52197	1.42084	1.44111	1.44753	1.45774
0.950627	0.93292	0.960025	0.929198	0.953735	0.9205	0.990898	0.928518	0.94925	0.967519	0.933494	0.923752	0.942707	0.937602	0.914949	0.964917	0.975101	0.960455	1.01705	0.949082	1.01041	1.03542	0.989301	0.96287	0.926048	0.934776	0.958044	0.898345	0.915505	0.91154	0.895	0.851757	0.960644	1.02342	1.01246	1.08925	1.10387	1.16649	1.17711	1.08174	1.10928	1.16399	1.12306	1.10457	1.09859	1.10684	1.11383	1.03951	1.10195	1.06864
0.503286	0.492333	0.469978	0.480908	0.483761	0.515999	0.530827	0.504978	0.511473	0.487919	0.485507	0.512696	0.539181	0.564702	0.599774	0.785721	0.617076	0.32122	0.334577	0.344087	0.399077	0.916768	1.07641	1.23979	1.04383	0.771323	0.755728	0.679703	0.643877	0.671358	0.642756	0.645225	0.747714	0.80767	0.836634	0.875065	0.906507	0.923627	0.999314	1.05773	1.0916	1.17665	1.18227	1.37636	1.51531	1.42204	1.48634	1.52401	1.56383	1.59428
0.580463	0.683838	0.719363	0.75679	0.90001	0.920677	0.98364	0.879826	0.826239	0.886577	0.816194	0.820072	0.847656	0.825505	0.841943	0.829485	0.890703	0.934816	0.955647	0.959532	0.945265	0.93745	0.994879	1.08105	1.17542	0.46371	0.0660968	0.0789719	0.0665594	0.0755559	0.877399	1.01432	1.02329	0.932534	1.16129	0.969413	1.10422	1.1269	1.33113	1.39532	1.33701	1.87722	1.97272	1.51183	1.28143	1.16965	1.36439	1.17345	0.934904	1.24736
0.902512	0.916947	0.915078	0.908643	0.880983	0.852344	0.864063	0.853397	0.850674	0.862431	0.828931	0.803179	0.810006	0.882088	0.882823	0.898165	0.823912	0.797659	0.755738	0.768956	0.750597	0.817874	0.806066	0.807887	0.771066	0.85332	0.86034	0.877952	0.865893	0.872764	0.884198	0.914557	0.949525	1.09732	1.18162	1.2986	1.35438	1.4489	1.44504	1.4543	1.58955	1.61323	1.60286	1.61291	1.6961	1.66864	1.73748	1.79097	1.68301	1.66903
1.3453	1.38357	1.34487	1.30437	1.21591	1.1639	1.17259	1.06181	1.18865	1.22355	1.2611	1.28935	1.23726	1.17603	1.27543	1.29054	1.26645	1.34935	1.35347	1.20031	1.40497	1.43362	1.3887	1.2434	1.40679	1.35379	1.31152	1.54931	1.66529	1.68383	1.67599	1.67094	1.61187	1.68264	1.65775	1.63585	1.5652	1.66374	1.72871	1.72038	1.58918	1.59013	1.56705	1.5434	1.51856	1.5788	1.56258	1.58713	1.64681	1.57996
0.934696	0.921885	0.968939	0.96072	0.96717	1.01948	1.04222	1.02867	0.985134	1.30496	1.24962	1.48936	1.36316	1.36871	1.28116	1.23374	1.24018	1.14565	1.13836	1.23761	1.20977	1.22049	1.22678	1.25416	1.08023	1.09344	1.11267	1.05853	0.969391	0.88025	1.03002	1.06372	1.07355	1.08497	1.0618	1.0955	1.16862	1.1164	1.18114	1.10615	1.21932	1.16586	1.19935	1.26672	1.22548	1.12558	1.13208	1.19982	1.08011	1.05869
1.19427	1.16116	1.1344	1.11002	1.07489	1.0887	1.16041	1.19361	1.2021	1.192	1.07816	1.18337	1.11764	1.0704	1.16648	1.17557	1.11046	1.04005	0.988669	0.802252	0.801952	0.720895	0.667324	0.717105	0.784201	0.788249	0.785994	0.686834	0.677683	0.709466	0.735552	0.69	0.815288	0.941463	1.10117	1.11326	1.09243	1.17164	1.05798	1.06197	1.11172	1.01556	1.08159	1.09292	1.08614	1.13705	1.2377	1.21741	1.19691	1.23373
1.10818	1.04096	0.992353	0.980189	0.941136	0.841165	0.84353	0.771272	0.78773	0.724725	0.775354	0.796822	0.822474	0.86054	0.888093	0.949297	0.839321	0.881787	0.931225	0.956972	0.960611	1.0137	1.01108	0.985265	1.0672	1.0532	1.03383	1.08506	1.06767	1.05046	1.05861	1.00955	1.04097	1.27365	1.42058	1.45033	1.53975	1.57613	1.57078	1.61073	1.66741	1.73672	1.74835	1.73515	1.75481	1.74858	1.67335	1.61584	1.61346	1.614
0.855246	0.892524	0.981241	1.11068	1.10925	1.11879	0.991142	0.868236	0.804662	0.803252	0.839035	0.800574	0.753281	0.711319	0.793544	0.71624	0.815952	0.781682	0.835087	0.813641	0.735315	0.855664	0.825002	0.910514	0.972727	1.00885	0.890338	0.907328	0.928954	0.950894	0.930413	0.925731	0.984664	1.04646	1.06284	1.19342	1.18905	1.23795	1.24518	1.28256	1.30578	1.24906	1.24928	1.22671	1.17624	1.19192	1.14888	1.09314	1.11579	1.09329
1.50232	1.50596	1.56242	1.61696	1.45248	1.3463	1.43393	1.53458	1.65087	1.43526	1.41932	1.54884	1.48073	1.45804	1.45604	1.40625	1.44573	1.38153	1.31957	1.39476	1.63644	1.7016	1.68694	1.66729	1.65831	1.70089	1.74858	1.76443	1.64483	1.776	1.59197	1.71153	1.59915	1.72837	1.73792	1.83595	1.92637	1.9121	1.77553	1.66806	1.6996	1.65042	1.71887	1.61163	1.60628	1.49586	1.68389	1.61674	1.58577	1.62617
1.1565	1.17839	1.18686	1.30212	1.4402	1.59778	1.70219	1.6228	1.51347	1.52923	1.32187	1.11866	1.13249	1.06568	1.03211	0.956987	1.01996	1.07717	1.04621	1.11192	1.20357	1.29159	1.29362	1.19147	1.53158	1.591	1.53108	1.42132	1.00322	1.33967	1.3193	0.933644	1.02268	1.09362	1.36	1.44668	1.38887	1.16054	1.0516	1.14034	1.67591	2.14772	1.74878	1.16251	1.10711	1.11779	1.19862	1.44782	1.50164	1.60597
1.56174	1.58139	1.76662	1.62908	1.5551	1.41162	1.59093	1.38717	1.4463	1.4063	1.40747	1.44435	1.42913	1.37277	1.32707	1.40726	1.48767	1.62499	1.45229	1.34902	1.47651	1.3407	1.28412	1.26095	1.37469	1.36572	1.38524	1.32322	1.43118	1.28202	1.31443	1.15326	1.25628	1.33313	1.45739	1.55196	1.40786	1.60541	1.60389	1.58403	1.61058	1.60009	1.67569	1.70179	1.62149	1.68812	1.72213	1.61193	1.52855	1.59398
0.797977	0.843901	0.862906	0.859701	0.846345	0.826121	0.781642	0.748875	0.74389	0.829235	0.749897	0.844782	0.753057	0.694512	0.847274	0.742819	0.705912	0.70003	0.658385	0.677491	0.666771	0.648855	0.63914	0.621883	0.628196	0.727977	0.678615	0.648718	0.642999	0.660006	0.710429	0.717789	0.740169	0.829805	0.800146	0.813041	0.901302	0.867807	1.04675	0.940861	1.0322	0.956303	1.06095	1.03239	1.04545	1.0881	1.15101	1.222	1.23728	1.25958
0.651132	0.640547	0.650973	0.674148	0.645466	0.674119	0.667293	0.654887	0.663706	0.660566	0.68164	0.6548	0.685672	0.683766	0.682519	0.66459	0.625301	0.617446	0.607632	0.634898	0.623375	0.637736	0.683201	0.662341	0.74158	0.721342	0.73413	0.736738	0.806833	0.741731	0.773513	0.790551	0.819973	0.938822	0.99896	1.17439	1.30082	1.30628	1.39362	1.45027	1.46716	1.4883	1.41335	1.39261	1.43948	1.34844	1.19516	1.07363	1.0524	1.10849
1.02287	1.00547	0.988071	0.970673	0.952352	0.857036	0.910118	0.928455	0.895261	0.858313	0.863491	0.881927	0.985183	0.903406	0.848262	0.884009	0.986758	0.97853	1.11798	1.02546	1.19823	1.36827	1.10251	0.986522	1.04951	1.06397	1.07198	1.25443	1.03186	1.12708	0.925393	0.866998	0.841909	0.887961	0.812592	1.00773	0.829258	0.929071	0.964715	0.888453	0.898882	0.879798	0.894953	0.927132	0.920107	0.902036	0.855914	0.882196	0.898537	0.9338
0.834086	0.904243	0.990213	0.965073	0.873015	0.757542	0.733482	0.728114	0.743425	0.754405	0.736653	0.664128	0.686153	0.714648	0.698478	0.697798	0.672693	0.622605	0.615521	0.640058	0.640971	0.610481	0.628898	0.619559	0.618636	0.634228	0.681259	0.672125	0.669878	0.684239	0.690875	0.699813	0.747763	0.820795	0.853779	0.891331	0.993291	1.04401	1.0425	1.15799	1.31907	1.43642	1.23343	1.29047	1.27064	1.20053	1.24928	1.23839	1.188	1.1802
1.05654	1.11276	1.0744	1.08968	1.09157	1.0728	1.05453	1.0936	1.04881	1.11064	1.0807	1.05166	1.08684	1.08236	1.12266	1.0852	1.04161	1.07528	1.09313	1.09358	1.06998	1.05265	0.958295	1.02124	0.996196	1.01131	0.981375	0.997143	0.949745	0.954322	0.993261	1.005	1.05898	1.19781	1.26462	1.37019	1.42986	1.50958	1.4771	1.59889	1.61328	1.58723	1.64364	1.73105	1.66991	1.69596	1.64123	1.67192	1.72363	1.69664
0.912878	0.885001	0.866153	0.859174	0.829056	0.825078	0.793626	0.775383	0.780115	0.793962	0.784822	0.761926	0.79645	0.784019	0.765585	0.762375	0.798354	0.803933	0.799979	0.807781	0.768816	0.780906	0.794316	0.779436	0.805826	0.790937	0.791746	0.794786	0.776279	0.756775	0.726879	0.789258	0.825745	0.869183	0.949589	0.983116	1.05508	1.09236	1.10626	1.09	1.10501	1.07875	1.05437	1.04625	1.02833	1.00082	1.02937	1.0191	1.05237	0.962063
0.634661	0.616389	0.590105	0.615033	0.62616	0.631768	0.633146	0.64206	0.617746	0.633557	0.620664	0.612353	0.638713	0.642385	0.640726	0.651493	0.640881	0.66163	0.645316	0.622124	0.634415	0.637131	0.624904	0.629428	0.648225	0.648254	0.629483	0.650011	0.657272	0.635383	0.639209	0.647547	0.745044	0.956727	1.12078	1.20307	1.36718	1.42452	1.476	1.42383	1.50257	1.46686	1.46142	1.47668	1.53568	1.47392	1.47556	1.48261	1.45435	1.3958
1.15824	1.20481	1.33745	1.30968	1.35246	1.38074	1.32797	1.48275	1.65682	1.40892	1.56135	1.71379	1.72264	1.5323	1.29178	1.20097	1.31254	1.47657	1.58455	1.45879	1.40157	1.44548	1.35505	1.30997	1.34768	1.37312	1.34352	1.54454	1.55636	1.47816	1.50269	1.53561	1.5014	1.70021	1.75898	1.7536	1.97255	2.00353	1.84612	1.87834	1.98606	2.08991	1.802	1.85159	1.60647	1.62459	1.63391	1.53252	1.60314	1.40724
0.970806	0.966463	0.914302	0.916013	0.903173	0.968067	1.01125	1.04895	1.08123	0.964787	1.04947	1.05359	1.01793	0.986022	0.966695	0.956588	0.951953	0.898035	0.878986	0.949951	0.96638	1.01893	0.986914	0.951888	0.973762	1.03573	0.990608	0.933419	0.973218	0.980496	0.964369	0.968743	1.05048	1.13026	1.0836	1.19452	1.27028	1.1976	1.1566	0.995525	0.971733	0.397855	0.0544737	0.0566204	0.0583068	0.0675416	0.0849133	0.10646	0.147097	0.418428
0.916664	1.03214	1.09827	1.05884	1.07669	1.20073	1.1154	1.00031	0.940209	0.825921	0.895308	1.00895	1.00788	1.01231	0.99943	1.02234	1.03603	0.99809	0.980099	1.1431	1.14183	1.04802	1.00955	1.01765	1.06284	1.0223	1.03797	1.02548	1.0872	1.05022	1.02476	1.09848	1.12682	1.24166	1.23052	1.37018	1.31289	1.5751	1.51331	1.47976	1.52185	1.52492	1.40567	1.32332	1.32313	1.46089	1.7115	1.7463	1.54432	1.31425
0.796297	0.784005	0.748101	0.665854	0.615696	0.589247	0.595887	0.545282	0.546047	0.57294	0.568478	0.563784	0.551887	0.626579	0.586897	0.560823	0.56424	0.582108	0.535051	0.521505	0.543647	0.586369	0.515429	0.497563	0.455754	0.493822	0.460746	0.486285	0.420133	0.495712	0.435315	0.445994	0.703002	0.538539	0.591563	0.581793	0.998155	1.16544	1.10292	1.07701	0.975897	0.98389	1.02576	0.962409	0.906228	0.875405	0.911676	0.994092	1.10687	1.12431
0.966334	0.984247	0.943177	0.902927	0.845008	0.87046	0.896731	0.89441	0.841672	0.802441	0.766614	0.732464	0.72598	0.861615	0.833363	0.783272	0.793205	0.746508	0.800114	0.81378	0.792683	0.753119	0.744401	0.706172	0.763862	0.797314	0.867168	0.858467	0.79018	0.798767	0.860997	0.893767	0.939425	1.02995	1.03217	0.929558	0.872159	0.888889	0.931359	0.965737	0.956358	0.961742	0.822788	0.930618	1.01226	1.05439	1.12863	1.09719	1.14577	1.226
1.185	1.2936	1.25459	1.23678	1.24818	1.39876	1.53041	1.49531	1.52362	1.61899	1.53488	1.62464	1.75497	1.66736	1.79805	1.89168	1.86486	1.79071	1.78727	1.82864	1.864	1.61931	1.42179	1.59318	1.45137	1.51402	1.5987	1.63453	1.6	1.57903	1.5942	1.76842	1.76767	1.92607	1.83879	1.89334	1.89608	1.92002	1.78356	1.82404	1.93166	1.70725	1.7679	1.76631	1.73336	1.68054	1.73999	1.91344	1.82983	1.82295
2.12803	1.97499	1.93661	1.78134	1.6463	1.54592	1.52088	1.42321	1.53473	1.37241	1.38174	1.00639	0.879448	0.848814	0.815184	0.816897	0.792405	0.815526	0.780192	0.816909	0.905789	0.869946	0.876868	0.841358	0.825259	0.800269	0.884013	1.01849	0.965341	1.08476	1.08539	1.01098	1.08038	1.08517	1.13156	1.17289	1.26221	1.20849	1.31202	1.32145	1.24197	1.17926	1.15905	1.06357	1.10681	1.09315	1.06016	1.07294	1.0801	1.07065
2.08444	1.7322	1.70382	1.63163	1.4574	1.4869	1.53517	1.68263	1.51937	1.72533	1.65915	1.54422	1.60889	1.46548	1.45594	1.57618	1.60629	1.56866	1.47967	1.46842	1.59724	1.60926	1.69207	1.63974	1.59385	1.61083	1.56249	1.3928	1.57946	1.58616	1.50135	1.5587	1.44007	1.50319	1.5792	1.56195	1.50233	1.52773	1.45148	1.37884	1.33899	1.31295	1.36384	1.41082	1.37124	1.3718	1.48324	1.48119	1.52203	1.60488
1.42298	1.30129	1.44861	1.31611	1.41364	1.36357	1.28641	1.33983	1.43942	1.46546	1.44853	1.39429	1.49048	1.49066	1.41863	1.54187	1.51698	1.26174	1.14344	1.52958	2.53233	2.6359	2.314	2.2209	1.75621	1.37655	1.18229	1.26169	1.25903	1.22192	1.24099	1.12547	1.164	1.21419	1.32225	1.45292	1.5008	1.45384	1.47785	1.42757	1.57287	1.42505	1.42726	1.39974	1.40855	1.3139	1.62604	1.38753	1.42196	1.35772
0.66332	0.755058	0.872612	0.866039	0.840079	0.703166	0.661691	0.647404	0.620756	0.627855	0.679296	0.597456	0.605826	0.572154	0.655822	0.586808	0.506599	0.566312	0.620162	0.694898	0.739175	0.71429	0.751906	0.794814	0.752436	0.706791	0.764725	0.753186	0.743061	0.738273	0.765386	0.772858	0.989478	1.07168	1.11925	1.1394	1.13454	1.20659	1.22489	1.1219	1.08212	1.08545	1.12482	1.09717	1.09782	1.05815	1.13934	1.21377	1.23751	1.34216
0.950782	0.820384	0.780689	0.695779	0.731792	0.700101	0.756418	0.761027	0.74831	0.784114	0.811014	0.816944	0.79885	0.842005	0.793853	0.80363	0.802252	0.957928	0.960589	0.932195	0.924456	0.860683	0.910809	0.896249	0.976207	0.89172	0.898395	0.871555	0.912669	0.898943	0.918631	0.979066	1.0442	1.1354	1.24452	1.26183	1.27232	1.28827	1.24189	1.20741	1.20268	1.16851	1.13367	1.06401	1.00757	1.03509	1.0628	1.19706	1.24864	1.30705
1.07115	0.959481	1.04899	0.956252	0.903736	0.960194	0.990385	0.950178	0.8986	0.960531	0.95323	0.895848	0.884054	0.73633	0.732561	0.705412	0.706986	0.692116	0.754922	0.672801	0.696246	0.689774	0.686949	0.792343	0.971532	1.23214	1.10441	1.46513	1.82584	2.18655	2.01369	1.7333	1.6752	1.90112	2.40418	2.27009	1.60797	1.5476	1.49447	1.7309	1.71307	1.84777	1.72898	1.88343	1.77296	1.62116	1.685	1.61559	1.51309	1.61368
0.870954	0.844018	0.821799	0.791974	0.773784	0.802906	0.775686	0.763314	0.80912	0.814851	0.772511	0.76329	0.780784	0.75519	0.724729	0.676437	0.695175	0.725876	0.788584	0.686439	0.711813	0.667789	0.696016	0.772864	0.750535	0.737699	0.727164	0.75249	0.804817	0.756326	0.771776	0.759584	0.826637	0.923827	1.11902	0.979719	0.928511	0.938027	0.969868	0.972548	1.01043	0.989189	1.59368	1.5463	1.51832	1.45114	1.46711	1.25669	1.17823	1.18866
1.02821	1.04737	1.01945	1.00564	0.998838	1.02286	1.03453	1.06309	1.09562	1.07096	1.0078	1.03907	0.954879	0.972015	0.978739	0.958078	0.943351	0.981992	0.982197	0.952803	0.928903	0.924662	0.97578	0.983433	0.972523	0.980154	1.00085	0.995834	1.05037	1.04036	1.01997	1.1178	1.0345	1.23001	1.23146	1.38338	1.28975	1.37868	1.38643	1.39074	1.44118	1.44287	1.37195	1.42339	1.34175	1.45393	1.40929	1.29396	1.40725	1.4394
1.41079	1.51726	1.52676	1.80908	2.02516	2.23602	2.06151	1.82315	1.71029	1.89218	1.4232	1.2699	1.79114	0.990932	1.01945	1.57707	0.991652	1.43053	1.08738	1.36509	1.41193	1.20453	1.36444	1.23491	1.33741	1.14451	1.19808	1.18848	1.26129	1.26688	1.16577	1.27641	1.2904	1.39055	1.414	1.31719	1.30975	1.33493	1.4365	1.44092	1.47921	1.51237	1.49637	1.43851	1.27231	1.30227	1.17714	1.24844	1.43163	1.35488
1.29904	1.282	1.36419	1.36633	1.56621	1.39855	1.35289	1.35757	1.20908	1.17409	1.12837	1.17642	1.19816	1.21118	1.25227	1.2031	1.19478	1.25432	1.40325	1.23186	1.39774	1.18242	1.16868	1.29032	1.01895	0.80685	0.763148	0.781633	0.820214	0.85018	1.03968	1.09208	1.38989	1.54733	1.77272	2.04522	2.59831	2.44602	2.3856	2.72287	2.56045	2.97391	2.80282	2.52576	2.66135	2.58366	2.31185	2.34246	2.2531	2.14949
0.695184	0.691035	0.744275	0.733784	0.673163	0.691463	0.673691	0.653048	0.69368	0.705893	0.784442	0.835779	0.816948	0.766471	0.728728	0.631987	0.691202	0.675233	0.648027	0.621054	0.513251	0.538052	0.548072	0.537591	0.556848	0.525632	0.583235	0.474427	0.526822	0.571965	0.559748	0.522259	0.497918	0.46342	0.501545	0.504808	0.513907	0.529989	0.480821	0.49991	0.505656	0.524149	0.524038	0.574304	0.516651	0.523709	0.587053	0.587752	0.576449	0.637611
0.757804	0.741875	0.699634	0.786325	0.778758	0.705956	0.722828	0.861073	0.882893	0.906264	0.99056	0.867427	1.02246	1.04779	0.892727	0.902838	0.837104	0.869747	0.771441	0.732669	0.803354	1.09977	0.692182	0.850167	1.01877	1.19291	1.36706	1.5412	1.78756	1.7138	1.42088	1.23076	1.34257	1.45227	1.36296	1.66914	1.45756	1.5956	1.47499	1.54867	1.70183	1.57434	1.59239	1.62586	1.77805	1.71251	1.90379	1.78923	1.62854	1.73856
1.3523	1.40225	1.45686	1.36789	1.4017	1.27445	1.2334	1.00798	0.973171	0.989862	0.948324	0.966724	0.941553	0.929485	0.952682	0.896667	0.897201	0.877565	0.817171	0.837087	0.823584	0.898466	0.915829	0.8563	0.845896	0.908281	0.889598	0.90524	0.997595	1.04015	1.13969	1.10541	1.03819	1.25047	1.29119	1.37952	1.34365	1.37316	1.44276	1.29969	1.39997	1.3507	1.41984	1.31471	1.37548	1.29019	1.41779	1.43511	1.48268	1.49341
0.833257	0.927442	0.754345	1.04586	1.00703	0.99274	1.05948	0.938623	0.990145	0.953805	0.902381	0.929322	0.934898	0.858413	0.825873	0.79587	0.806514	0.775411	0.782514	0.79064	0.746792	0.786399	0.793717	0.848713	0.831281	0.877843	0.896742	1.05453	0.128544	0.066261	0.0544945	0.0480658	0.0654249	0.0734882	0.124312	0.19333	1.4739	1.65838	1.91878	1.79422	1.66134	1.7786	1.82135	1.59336	1.54988	1.41691	1.58512	1.5237	1.44522	1.52083
1.08868	1.18045	1.16542	1.15434	1.11939	1.22933	1.18627	1.17279	1.19533	1.17102	1.17007	1.21268	1.18307	1.10227	1.17478	1.09463	1.1278	1.13088	1.09851	1.13929	1.12811	1.04633	1.07639	0.976263	0.970166	0.972034	0.96808	0.951113	0.918775	0.962019	0.885351	0.913308	1.01567	1.02366	1.12695	1.11927	1.10287	1.18812	1.11252	1.17183	1.11131	1.15772	1.2072	1.18977	1.13737	0.979816	1.02073	0.951896	1.08648	0.996765
1.60166	1.63738	1.57596	1.42643	1.3391	1.44351	1.39546	1.33561	1.32664	1.38882	1.32058	1.33429	1.36785	1.43432	1.47508	1.49935	1.53458	1.52205	1.55132	1.58186	1.52553	1.54344	1.56586	1.63835	1.72436	1.73989	1.65102	1.6229	1.64558	1.83726	1.76603	1.76344	1.78714	1.88384	2.02045	2.10292	2.19317	2.28493	2.22169	2.25459	2.28297	2.17766	2.20015	2.16995	2.08459	1.91238	1.77999	1.81949	1.8026	1.82862
1.34241	1.19993	1.30863	1.26419	1.22486	1.26128	1.2161	1.15331	1.173	1.19809	1.15614	1.15205	1.10616	1.09796	0.967506	1.02799	1.07262	1.03673	1.02649	1.1756	1.13979	1.0791	1.09307	1.1047	1.07075	1.08416	1.08131	1.02002	1.0756	1.02628	1.02935	1.11384	1.24377	2.87933	2.14246	2.67522	1.54923	1.41832	1.39744	1.37657	1.35124	1.3403	1.02243	0.853553	0.768726	0.778524	1.01737	1.11104	0.869848	0.809964
1.21768	1.22646	1.26801	1.21644	1.24564	1.22367	1.25915	1.19771	1.1645	1.23114	1.15996	1.21189	1.23643	1.22459	1.20571	1.16026	1.11585	1.09247	1.11493	1.17914	1.20862	1.25978	1.26567	1.2003	1.31307	1.27208	1.32273	1.32706	1.33139	1.28288	1.31901	1.23986	1.33147	0.843091	0.302888	0.293447	0.310296	0.340365	0.367374	0.37942	0.426509	0.443538	0.50161	0.488193	0.486441	0.658327	0.494518	0.511462	0.521714	0.573029
1.24716	1.22047	1.18039	1.12624	1.10392	1.09301	1.02189	1.00933	1.07225	1.02495	0.980133	1.02908	1.00918	1.01134	1.04883	1.04361	1.0312	0.980381	0.927915	1.00009	0.908859	0.919412	0.945964	0.924567	0.995661	0.991829	0.965688	1.00633	1.00797	0.942556	0.965158	0.947025	0.998028	0.997427	1.04018	1.125	1.14321	1.06724	1.09073	1.18345	1.16449	1.1867	1.22454	1.15774	1.21685	1.20091	1.12619	1.11569	1.10616	1.12376
1.02392	0.970128	1.04912	1.09163	1.04125	1.1146	1.08583	1.03416	1.0211	1.08858	1.09114	1.07162	1.05447	1.0776	1.04768	1.0557	1.07323	1.09026	1.05026	1.04175	0.988296	0.975993	1.0264	0.996962	0.925351	0.943285	0.967564	0.959555	0.937074	0.95637	0.957273	0.961054	0.94594	0.951779	1.08514	1.16285	1.1353	1.23953	1.18328	1.11846	1.20485	1.20638	1.20914	1.24625	1.18957	1.20262	1.25562	1.19169	1.1361	1.13487
1.24612	1.15185	1.15596	1.19465	1.22538	1.18803	1.11859	1.13749	1.07245	1.18302	1.19483	1.22285	1.209	1.2363	1.25577	1.28964	1.23192	1.146	1.16171	1.14039	1.10887	1.13737	1.14504	1.132	1.19401	1.19882	1.26409	1.20549	0.969426	1.04729	1.16093	1.19913	1.14827	1.25964	1.3278	1.29554	1.34969	1.36884	1.38046	1.32712	1.36257	1.28805	1.23643	1.20574	1.26974	1.18713	1.24038	1.31943	1.34501	1.28516
1.03508	1.10016	1.08239	1.10227	1.07757	0.978715	1.1757	1.10513	1.0949	1.07572	0.984751	1.03176	1.00174	0.824368	0.892071	0.931449	0.942121	0.917026	0.939195	0.938247	0.873333	0.881819	0.953402	0.956641	0.970337	1.00821	1.10219	1.11985	1.14352	1.11368	1.04591	1.0419	1.03152	1.12771	1.10273	1.16637	1.2171	1.20644	1.35413	1.26604	1.23076	1.30412	1.23842	1.16027	1.2409	1.20537	1.26063	1.23384	1.08187	0.723073
0.955188	1.01728	1.20046	1.26982	1.45661	1.33629	1.27292	1.15063	1.02489	0.950115	0.862163	0.879065	0.889668	0.923121	0.940433	0.917507	0.890069	0.909718	0.925259	1.00517	0.955405	1.01391	0.985539	0.939614	0.99767	0.954764	0.948921	1.07482	1.02087	1.00729	1.13924	1.23563	1.37868	1.35703	1.29115	1.22315	1.20776	1.19037	1.28455	1.33579	1.38911	1.4114	1.46779	1.4503	1.44283	1.48123	1.56617	1.47199	1.40474	1.3893
1.42355	1.35518	1.26298	1.22152	1.17347	1.12428	1.14193	1.09897	0.987948	1.04821	1.04271	1.06029	1.05339	1.07006	1.16926	1.15659	1.05821	1.07356	1.10537	1.21324	0.991964	0.87976	0.959218	0.898117	0.810513	0.852305	0.798796	0.861222	0.90835	0.860961	0.905565	0.88256	0.963512	1.09731	1.03827	1.0904	1.0996	1.06914	1.11105	1.1766	1.15594	1.32447	1.13581	1.19486	1.28576	1.14913	1.1999	1.21636	1.21755	1.15549
0.623381	0.644216	0.654385	0.6311	0.637655	0.648435	0.688414	0.652105	0.671051	0.673689	0.666942	0.678356	0.652491	0.632101	0.647456	0.657339	0.637667	0.596617	0.60927	0.601259	0.61034	0.569747	0.556123	0.557356	0.537115	0.539979	0.58635	0.552422	0.554881	0.580703	0.635478	0.623209	0.601339	0.646961	0.722587	0.739623	0.705663	0.744707	0.68001	0.698313	0.730815	0.752957	0.834409	0.863827	0.876051	0.843797	0.84325	0.866095	0.882981	0.885929
1.47786	1.67091	1.65961	1.70771	1.46707	1.51573	1.34965	1.29881	1.26678	1.37921	1.45257	1.6135	1.67492	1.73661	1.70598	1.55503	1.61721	1.47858	1.50386	1.22556	1.55588	1.44187	1.48462	1.46667	1.44311	1.35369	1.37053	1.36191	1.56947	1.57799	1.50916	1.32475	1.2063	1.28229	1.3734	1.22165	1.21919	1.24677	1.42636	1.3499	1.39265	1.60217	1.84786	1.72705	1.70268	1.48755	1.56577	1.65726	1.68832	1.93834
1.14798	1.32799	1.31512	1.17402	1.07245	1.02369	0.926348	0.845042	0.795629	0.786684	0.696137	0.720215	0.83307	0.849284	1.00283	1.1177	1.16949	1.03585	0.979058	0.960482	0.908389	1.10184	1.18954	1.24307	1.2197	1.23586	1.19794	1.17438	1.23978	1.23988	1.35683	1.3654	1.3718	1.53769	1.60088	1.63115	1.67026	1.76689	1.67413	1.74707	1.72029	1.79882	1.97008	2.11397	2.11293	2.20569	2.2168	2.12433	2.15825	2.05451
1.24031	1.18237	1.18545	1.19803	1.2682	1.19947	1.2847	1.20617	1.16742	1.22801	1.2089	1.20809	1.25489	1.25409	1.23644	1.18937	1.20955	1.21573	1.31524	1.26317	1.27683	1.26726	1.31238	1.33074	1.28003	1.32285	1.31927	1.30179	1.22277	1.20227	1.23313	1.24646	1.21421	1.25427	1.28942	1.4011	1.41085	1.47822	1.43433	1.38561	1.50278	1.4788	1.45231	1.50934	1.43246	1.48907	1.5275	1.66441	1.5406	1.61343
1.25538	1.29419	1.30624	1.31261	1.25452	1.28141	1.27429	1.28275	1.31045	1.3301	1.32677	1.31062	1.28582	1.26222	1.31749	1.33657	1.30388	1.31641	1.3214	1.32878	1.33949	1.38733	1.37806	1.36879	1.34104	1.36817	1.34556	1.36332	1.37837	1.39448	1.41761	1.42481	1.53238	1.63081	1.7022	1.79973	1.7526	1.77517	1.74568	1.79228	1.87396	1.88247	1.9038	1.89579	1.781	1.70251	1.74269	1.70106	1.61098	1.68303
1.25194	1.18816	1.21101	1.18687	1.19493	1.19546	1.17635	1.09125	1.15164	1.16977	1.1209	1.12968	1.11945	1.11729	1.16914	1.13637	1.13409	1.10031	1.15539	1.13084	1.14932	1.17991	1.12016	1.17308	1.17602	1.16215	1.18804	1.07939	1.10498	1.09672	1.105	1.06325	1.11627	1.09611	1.10072	1.14107	1.12136	1.16516	1.21748	1.21373	1.31143	1.3088	1.32541	1.24519	1.2399	1.2914	1.29875	1.23957	1.20278	1.28242
1.07865	1.06921	1.09916	1.1009	1.11711	1.23392	1.2415	1.25215	1.31748	1.26595	1.25397	1.2254	1.2188	1.21213	1.24806	1.14511	1.19089	1.16787	1.14149	1.08856	1.10415	1.13274	1.13866	1.15189	1.11486	1.09391	1.07258	1.06592	1.07093	1.14624	1.12626	1.09097	1.03763	1.13765	1.175	1.14764	1.10766	1.19377	1.12488	1.12349	1.14913	1.19373	1.16631	1.19953	1.23221	1.44467	1.28174	1.39172	1.18038	1.16505
1.21381	1.13835	1.10871	1.04732	0.987394	1.15181	1.04048	1.04851	1.04827	1.04503	1.05075	1.05997	0.948904	0.902485	0.856066	0.809647	0.92319	0.909069	0.863448	0.877701	0.685193	0.602935	0.57995	0.586929	0.660209	0.653353	0.66056	0.62625	0.624016	0.616136	0.618646	0.621157	0.646198	0.753541	0.821846	0.830327	0.924482	0.885262	0.855019	0.863078	0.997437	1.0067	1.03396	1.0324	1.14421	0.984537	1.05106	1.09495	0.990571	1.03683
1.23321	1.17521	1.0646	1.00897	0.980994	0.98728	0.934629	0.908484	0.828471	0.8765	0.878148	0.865505	0.85849	0.889876	0.860348	0.800591	0.852778	0.920098	0.934951	0.998013	0.963532	0.96775	0.901305	0.941974	0.886225	0.898584	0.870024	0.877171	0.82385	0.840336	0.834564	0.819428	0.85284	0.898121	0.947673	1.06144	1.14637	1.13937	1.03801	1.13987	1.24174	1.31947	1.21838	1.22021	1.27896	1.28975	1.3838	1.31801	1.37415	1.40502
0.659969	0.639173	0.659968	0.636599	0.656891	0.70707	0.725372	0.701141	0.731248	0.66077	0.644364	0.609506	0.611241	0.61276	0.605875	0.577095	0.587455	0.562838	0.572948	0.590048	0.64802	0.634988	0.619057	0.586273	0.581327	0.58473	0.587393	0.615709	0.663178	0.922017	0.684208	0.446399	0.502955	0.451156	0.54717	0.843582	1.00319	1.16279	1.50148	1.47723	1.36997	1.23783	1.33854	1.28049	1.2454	1.25036	1.40524	1.34776	1.33781	1.40044
0.846314	0.844898	0.840115	0.876458	0.881811	0.957647	1.02262	0.991033	0.999349	1.09067	1.10239	1.03504	0.95116	0.992822	1.05076	1.04229	1.02228	1.0981	1.06058	1.0221	1.00858	1.13818	1.06883	1.08312	0.97625	1.04776	1.36722	1.3528	1.03315	1.27597	1.26667	1.25737	1.27169	1.40547	1.18323	1.20964	1.27473	1.51231	1.53523	1.37668	1.23459	1.37205	1.41205	1.35507	1.45443	1.18266	1.19031	1.19056	1.1748	1.10272
0.873095	0.883245	0.90157	0.961257	0.985544	0.944794	0.923145	0.834494	0.784829	0.800506	0.802487	0.821866	0.831784	0.792266	0.797416	0.780888	0.752322	0.738503	0.733025	0.709963	0.71973	0.699068	0.742018	0.730521	0.747168	0.722494	0.706481	0.694042	0.653549	0.627288	0.633117	0.678683	0.70919	0.80516	0.901793	0.989516	1.05857	1.17323	1.16887	1.23863	1.2073	1.20788	1.20322	1.1629	1.161	1.0615	1.09277	1.03664	0.991942	0.983913
1.30448	1.27571	1.29678	1.20282	1.28787	1.30181	1.10181	1.1978	1.36115	1.36648	1.26404	1.21459	1.27772	1.24594	1.18189	1.2557	1.24943	1.34225	1.20519	1.02947	0.893658	0.772685	0.876109	0.938717	0.915207	0.798239	0.930122	1.01204	0.849247	1.01259	0.898581	0.881609	0.785016	0.714251	0.608913	0.615479	0.753015	0.748382	0.922421	1.18641	1.26087	1.48354	1.40344	0.980658	1.06497	1.31117	1.47731	1.75302	1.56231	1.50832
1.21257	1.17816	1.10213	1.0468	1.08022	1.03922	1.1715	1.19768	1.1709	1.19613	1.13347	1.19001	1.17912	1.12487	1.26253	1.27187	1.36978	1.96031	1.29484	1.77048	1.35238	1.19985	1.42512	1.34958	1.86875	1.85915	1.77111	1.67835	1.491	1.4845	1.33865	1.2226	1.43841	1.36589	1.53387	1.60311	1.69461	1.63709	1.73021	1.73669	1.88485	1.73242	1.92632	1.87474	1.80409	1.90741	1.86131	1.7036	1.61666	1.85
1.2779	1.31403	1.23014	1.1948	1.21728	1.12259	1.01232	1.06268	1.03944	1.03955	0.946662	0.973506	0.906382	0.909919	0.944947	0.940855	0.832812	0.779713	0.78743	0.766093	0.80281	0.767724	0.780418	0.772319	0.784163	0.782596	0.790946	0.793558	0.748493	0.753865	0.741469	0.732989	0.774935	0.835073	0.934852	1.0133	1.09212	1.09939	1.12234	1.16227	1.18797	1.18766	1.22509	1.25813	1.29041	1.26137	1.25235	1.24687	1.23132	1.21793
2.7273	0.96433	0.992079	1.20283	1.1537	1.32006	1.21183	1.30958	2.18751	2.06682	2.15746	1.9636	1.9928	1.19771	1.15253	1.25544	1.80501	1.76077	1.92757	1.75814	1.33056	1.33249	1.37366	1.49088	1.42431	1.6971	1.48622	1.49524	1.34718	1.27436	1.58435	1.44911	1.12447	1.10841	1.05244	1.01785	1.0778	1.11322	1.21634	1.20654	1.11949	0.966608	0.903491	0.755246	0.712927	0.879918	0.891758	0.986632	0.997551	0.937728
0.764315	0.706887	0.701054	0.715665	0.737909	0.761118	0.842436	0.845866	0.792445	0.770309	0.702864	0.714348	0.720268	0.740566	0.750864	0.809953	0.766412	0.755093	0.756536	0.752103	0.750825	0.727241	0.690063	0.672111	0.708691	0.697274	0.690711	0.669745	0.658313	0.647815	0.68766	0.717686	0.692136	0.741508	0.779161	0.822514	0.839381	0.86005	0.85667	0.8429	0.843582	0.790572	0.79582	0.790798	0.73174	0.756769	0.809128	0.794186	0.840258	0.852124
1.12283	0.866371	0.935796	1.10531	1.18408	1.25313	1.2717	1.59001	1.32081	1.27924	1.23767	1.19611	1.23538	1.10263	1.04293	1.07979	1.07399	1.1339	1.20756	1.15942	1.27814	1.3562	1.36469	1.4277	1.48228	1.30805	1.26377	1.39764	1.41144	1.4831	1.40451	1.31549	1.28344	1.3581	1.38475	1.37393	1.4938	1.65031	1.77134	1.94016	1.81426	1.93679	1.94641	1.87265	1.6759	1.54559	1.41801	1.50697	1.55668	1.41584
1.31816	1.30235	1.31966	1.31791	1.269	1.27052	1.25317	1.31319	1.28823	1.24146	1.26212	1.18592	1.14523	1.17231	1.15058	1.08596	1.08979	1.04355	1.00307	0.966678	1.01419	1.02186	0.983411	0.960416	0.9745	0.947219	0.926679	0.954749	0.909652	0.893071	0.897652	0.897152	0.94384	0.984574	0.948996	1.00136	1.04106	1.08036	1.04334	1.03007	1.04259	1.01549	1.02288	1.06054	1.02493	1.05687	1.04764	1.03388	1.01457	0.989185
1.2911	1.33163	1.16715	1.25192	1.13376	1.03457	0.977526	0.825289	0.77978	0.70655	0.790597	0.827242	0.814686	0.776678	1.15974	1.27778	1.27482	1.57403	1.56298	1.61916	1.59473	1.69623	1.69592	1.60722	1.71368	1.76463	1.59722	1.43345	1.42371	1.49615	1.39283	1.41438	1.48981	1.85276	2.90439	1.62664	1.78067	2.2449	2.83209	1.82079	2.47603	2.12727	2.06402	1.99231	1.98509	2.08456	1.86704	1.8443	1.99267	2.09665
0.789689	0.776538	0.782134	0.769148	0.772585	0.797234	0.768209	0.782731	0.793081	0.804241	0.790371	0.782217	0.755992	0.792063	0.797451	0.77036	0.797005	0.776176	0.7656	0.779213	0.76429	0.769544	0.769089	0.719367	0.705703	0.747238	0.717387	0.753429	0.752139	0.766132	0.762646	0.793756	0.805829	0.905729	0.925085	0.968799	1.02747	1.00456	1.04434	1.03498	1.04138	1.02425	1.07408	1.06528	1.03609	1.01264	0.977273	0.999453	1.03941	1.00234
1.38132	1.27895	1.27149	1.35633	1.37058	1.32299	1.3444	1.38477	1.38052	1.41981	1.37216	1.31432	1.32576	1.28506	1.27431	1.24562	1.26755	1.28019	1.24784	1.16413	1.19626	1.20844	1.21991	1.14992	1.10347	1.11924	1.18665	1.19737	1.23562	1.21275	1.22761	1.19361	1.25276	1.37977	1.43378	1.50975	1.55779	1.55758	1.57913	1.62026	1.61025	1.70621	1.65569	1.62716	1.71386	1.70849	1.73445	1.72484	1.68084	1.64519
1.1981	1.14043	1.16454	1.1369	1.07915	1.04263	1.17137	1.19155	1.22991	1.15865	1.12267	1.13153	1.16204	1.09902	1.26539	1.18954	1.09131	1.0706	1.11803	1.16313	1.19729	1.15132	1.19434	1.31981	1.3091	1.22084	1.33926	1.17823	1.1587	1.17269	1.18173	1.15591	1.18703	1.27245	1.26529	1.31566	1.19344	1.27549	1.2215	1.24312	1.3036	1.31696	1.28052	1.31115	1.29102	1.24123	1.41379	1.23925	1.26486	1.36529
1.25765	1.27962	1.30458	1.23069	1.1979	1.207	1.28929	1.20778	1.18292	1.17981	1.13005	1.2123	1.22595	1.22466	1.26027	1.25621	1.20178	1.19061	1.17846	1.12852	1.07116	1.02711	1.03055	1.00338	0.981726	0.948126	0.951268	0.9355	0.971529	0.998571	1.01746	0.953034	1.04312	1.02672	1.09883	1.15264	1.18958	1.22023	1.26232	1.26394	1.29013	1.29327	1.20553	1.25735	1.31599	1.33655	1.27564	1.23171	1.17865	1.18636
0.921631	0.853031	0.858164	0.844375	0.863381	0.795128	0.751352	0.743609	0.80465	0.744148	0.750791	0.814414	0.808902	0.804416	0.735208	0.769442	0.757205	0.768754	0.777782	0.800619	0.756464	0.730842	0.753121	0.781051	0.807902	0.811735	0.797268	0.792753	0.748678	0.81485	0.834557	0.898628	0.942933	1.13719	1.40258	1.78219	1.85799	1.77189	1.72063	1.96159	2.04617	1.81007	1.70837	1.79614	1.62576	1.48369	1.45994	1.4143	1.3467	1.24575
1.10193	1.03918	0.897986	0.878283	0.78144	0.801587	0.718276	0.748246	0.823904	1.05997	1.09918	1.06547	0.939615	0.818606	0.950638	1.28889	1.34103	1.11033	1.36029	1.52169	1.42586	1.46011	1.47998	1.50414	1.45141	1.46215	1.47939	1.40655	1.63196	1.50308	1.36553	1.4359	1.41392	1.51827	1.65524	1.80574	1.88635	1.93325	1.80253	1.79219	1.9279	1.82717	1.6279	1.64371	1.55047	1.47992	1.54925	1.67015	1.50331	1.84896
0.880289	0.877423	0.876844	0.848203	0.805598	0.815117	0.812381	0.800842	0.832499	0.847017	0.804871	0.790454	0.76031	0.828183	0.92241	0.844409	0.735529	0.759755	0.856878	0.862882	0.862741	0.676759	0.782405	0.853919	0.704113	0.707308	0.685504	0.708393	0.678721	0.679831	0.712407	0.699168	0.679398	0.715966	0.777276	0.939308	0.974036	0.981378	1.02882	1.04374	0.99509	1.01783	0.965073	0.882457	0.912866	0.919028	0.878319	0.821009	0.885153	0.899166
1.12042	1.15192	1.13788	1.2922	1.257	1.22836	1.21393	1.28245	1.30448	1.32484	1.09065	0.92268	1.00119	1.06446	1.03205	1.13968	1.19469	1.16711	1.11903	1.1506	1.09342	1.03007	1.02948	1.05524	1.12968	1.11514	1.15496	1.16366	1.12884	1.18543	1.22386	1.2104	1.26628	1.32272	1.43713	1.48545	1.56156	1.58198	1.6358	1.77348	1.85976	1.73147	1.81746	1.85841	1.84221	1.86585	1.92021	2.05107	1.80116	1.80883
1.05747	1.10514	1.06652	1.07658	1.07579	1.12492	1.0806	1.18513	1.18964	1.15612	1.14701	1.19233	1.25729	1.07043	1.0279	0.898338	0.865779	0.849376	0.842611	0.927003	0.998358	1.07996	1.13464	1.21333	1.19967	1.24186	1.24656	1.2151	1.26363	1.24194	1.1672	1.2389	1.22063	1.34443	1.5257	1.67317	1.77205	1.82943	1.81628	1.8025	1.71754	1.47386	1.55891	1.54883	1.46728	1.38418	1.29044	1.25648	1.30513	1.26776
1.90594	1.98057	2.27521	2.14529	2.01325	1.82927	1.89894	1.86247	2.06731	1.93736	2.19694	1.93587	2.10572	2.12781	1.90322	1.91753	1.95927	1.78655	2.04935	1.94392	1.99029	1.91119	1.8677	1.98561	1.9786	2.12628	1.88233	1.82926	1.96456	2.0227	1.95402	2.03739	1.83388	2.02172	1.9435	2.18397	2.3092	2.36358	2.1463	1.92653	2.00936	2.12052	2.34101	2.1213	2.29123	1.91887	2.03565	1.95968	1.9995	1.89278
1.03579	0.982577	0.994194	1.00136	1.02429	1.02843	1.06917	1.09659	0.984985	0.993731	0.99702	0.947487	0.899666	0.9344	1.00301	0.93671	1.04747	1.03839	0.997002	1.0379	0.976474	0.946747	0.97229	1.0012	1.03094	1.11843	1.10535	1.05136	1.07943	1.09492	1.06677	1.136	1.26026	1.2126	1.15138	1.23	1.35209	1.46261	1.94424	1.93957	1.95245	1.84155	1.78054	1.85278	1.70976	1.60231	1.66577	1.65086	1.91771	1.98385
1.21935	1.15371	1.27245	1.36117	1.51318	1.6028	1.65117	1.51816	1.49434	1.66763	1.54496	1.44556	1.54108	1.35747	1.34522	1.60574	1.3965	1.36439	1.16798	1.32916	1.15444	1.24844	1.39511	1.3799	1.1078	1.22155	1.29721	1.30032	1.44323	1.58639	1.48336	1.43298	1.39502	1.56843	1.45705	1.45115	1.35543	1.38349	1.39077	1.43966	1.4695	1.2964	1.31025	0.879607	0.938902	0.998196	1.18224	1.26192	1.14239	1.03047
1.4637	1.31562	1.25654	1.48551	1.30599	1.30773	1.30569	1.22985	1.14145	1.24595	1.21279	1.15154	1.17755	1.00998	0.886937	0.872166	0.761362	0.678756	0.699329	0.649552	0.592925	0.59891	0.892107	0.728168	0.824797	0.867876	0.697927	0.91007	0.692312	0.704239	0.685762	0.808592	0.746804	0.864579	0.756212	0.823482	0.940529	0.882861	1.02126	1.00564	1.00096	1.00631	1.01757	1.02449	1.05405	1.01612	0.974195	0.912849	0.884526	0.814546
1.58317	1.41671	1.3319	1.36325	1.27787	1.25711	1.2608	1.34033	1.31514	1.30078	1.2974	1.31958	1.31925	1.32985	1.3782	1.40808	1.41493	1.42178	1.39996	1.47254	1.48386	1.47103	1.4637	1.34943	1.46432	1.4336	1.31054	1.26937	1.20964	1.29668	1.25387	1.22755	1.25305	1.35486	1.43896	1.44036	1.51026	1.52931	1.44938	1.33482	1.52901	1.41547	1.31904	1.2418	1.26198	1.60387	1.57623	1.6588	1.47422	1.46047
1.09718	1.02699	0.986897	1.08316	1.00404	0.904811	0.940768	1.01399	0.969994	0.982652	0.826192	0.81247	0.760949	0.788152	0.891509	0.951629	0.928963	0.901975	0.952015	0.874836	0.931564	1.16824	1.2094	1.22994	1.14114	1.20799	1.17705	1.07867	1.30605	1.218	1.24407	1.37475	1.45813	1.56379	1.58614	1.78265	2.06896	1.56614	1.89757	1.62254	2.30642	2.07422	1.71252	1.56677	1.44074	1.51778	1.23488	1.39669	1.22568	1.4783
1.09466	0.901403	0.869022	0.924339	0.911831	0.896266	0.951905	0.909393	0.966717	1.02118	1.02029	1.0652	1.05885	0.976888	1.16254	1.15745	1.2334	1.21958	1.19792	1.13994	1.18464	1.24933	1.19589	1.23471	1.22994	1.24103	1.21412	1.28518	1.34838	1.34633	1.32313	1.39301	1.52933	1.67906	1.73318	1.96778	1.94811	1.89747	1.93176	2.06338	2.01339	2.13976	2.16096	2.12726	1.97498	2.09751	2.02902	2.13911	2.05013	2.2551
1.50182	1.29418	1.10935	1.08719	1.12857	1.2173	1.19886	1.20114	1.28584	1.29189	1.2317	1.2689	1.22134	1.16754	1.20407	1.17015	1.14695	1.19634	1.25418	1.21647	1.18881	1.1433	1.07288	0.890113	0.876688	0.871539	0.963628	0.975868	1.02881	1.10483	1.24306	1.22117	1.17327	1.20263	1.14473	1.06506	1.05939	1.12921	1.09252	1.07273	1.0028	1.02045	0.992482	0.99063	1.01303	0.93323	0.880062	0.849942	0.896157	0.876712
1.43831	1.47057	1.40097	1.38072	1.32497	1.21473	1.27878	1.21354	1.19094	1.22645	1.29384	1.2865	1.33157	1.24849	1.30211	1.27547	1.26657	1.30284	1.27321	1.33119	1.36849	1.33194	1.35679	1.36802	1.36335	1.28573	1.2901	1.16289	1.18502	1.1741	1.10549	1.15165	1.29806	1.37308	1.20571	1.10089	1.26531	1.33752	1.26722	1.38767	1.55005	2.02259	1.6505	1.76025	1.48897	1.54565	1.40639	1.33126	1.46793	1.47116
1.18351	1.13974	1.07823	1.10462	1.10451	1.08827	1.08288	1.06403	1.0481	1.08075	1.03065	0.945649	0.968294	0.978291	0.932299	0.99938	0.976047	0.946986	1	1.02504	0.936795	0.92063	0.982695	1.04713	1.03978	1.06726	1.09918	1.08792	1.08865	0.909779	0.914438	0.949243	0.813117	0.921308	0.9418	1.02218	1.0973	0.950082	0.933053	1.00741	1.06533	1.10118	1.06905	0.975488	1.0468	0.955957	1.05246	1.03065	0.944351	0.9487
0.918821	1.05808	0.997191	1.03805	1.05134	1.52404	1.61003	1.43173	1.47735	1.42726	1.46723	1.45658	1.57173	1.47528	1.69049	1.63007	1.57231	1.59911	1.56845	1.51223	1.42511	1.19997	1.14046	1.17337	1.1247	1.10102	1.02306	1.14387	1.11668	1.33373	1.22437	1.14231	1.27248	1.38235	1.4862	1.51289	1.3617	1.34972	1.25396	1.23782	1.51607	1.47158	1.49726	1.4949	1.39728	1.43908	1.34865	1.35881	1.38047	1.53132
0.767841	0.818021	0.822781	0.81936	0.824075	0.83419	0.8571	0.902115	0.898632	0.905885	0.912377	0.932836	0.919104	0.931198	0.92511	0.940783	0.974231	0.942616	0.940122	0.908798	0.873036	0.91923	0.888541	0.917131	0.929741	0.904624	0.901653	0.892426	0.8674	0.928091	0.89023	0.915054	0.928675	0.962334	0.931921	0.972159	0.951447	0.995916	0.923271	0.964819	0.919489	0.934826	0.913485	0.925986	0.901722	0.926819	0.915804	0.924434	0.930365	0.946293
2.0652	1.97446	2.01603	2.02145	1.89809	1.83187	1.81829	1.76303	1.73353	1.70032	1.58786	1.64458	1.59965	1.4828	1.42206	1.46735	1.5538	1.58189	1.62781	1.64983	1.71811	1.65055	1.59772	1.48491	1.50916	1.43914	1.39684	1.29706	1.27459	1.20058	1.2391	1.2612	1.20612	1.25913	1.24304	1.16947	1.39838	0.649257	1.3019	1.45439	1.53053	1.44575	1.40968	1.60132	1.41398	1.5377	1.47907	1.51943	1.64197	1.798
1.23602	1.23948	1.18553	1.22397	1.27777	1.29216	1.30256	1.27671	1.22009	1.15275	1.10349	1.10644	1.04152	1.00457	1.0045	1.0366	1.03381	1.03316	1.04879	1.07778	1.1471	1.1509	1.10293	1.11089	1.1457	1.13465	1.10403	1.12313	1.13187	1.1825	1.25673	1.2843	1.3569	1.50757	1.58284	1.59373	1.86776	1.83769	1.79315	1.92327	1.8726	1.91979	1.88739	1.86102	1.89726	1.69984	1.70933	1.5464	1.5769	1.65955
1.2666	1.24058	1.30553	1.27292	1.25185	1.18808	1.22386	1.16408	1.1284	1.12083	1.17115	1.15575	1.19433	1.1238	1.17218	1.03931	1.05235	1.06239	0.9853	0.95642	0.933914	0.939961	0.939548	0.891196	0.989094	0.944739	0.974482	0.869745	0.799518	0.846454	0.865275	0.868956	0.87452	1.04325	1.11844	1.19143	1.24319	1.31387	1.39251	1.47519	1.39168	1.38428	1.3636	1.40887	1.37378	1.26404	1.34602	1.25671	1.14954	1.2451
0.998443	0.95309	0.869556	0.801477	0.709889	0.652002	0.623675	0.613523	0.560603	0.553652	0.616212	0.668648	0.656751	0.593168	0.573596	0.584527	0.603939	0.643338	0.625245	0.63976	0.636986	0.664949	0.614171	0.643989	0.589231	0.62086	0.653684	0.716891	0.743182	0.769006	0.793682	0.707313	0.826149	0.901313	0.966798	1.16011	1.02568	1.06493	1.03126	1.00462	0.987857	1.06292	1.12318	1.04282	1.13676	1.06782	1.20569	1.22912	1.26926	1.27549
1.01043	0.961898	0.928486	0.805377	0.752896	0.896629	0.910343	1.05286	1.08128	1.11372	1.21529	1.23589	1.21747	1.22178	1.08251	1.13016	1.07216	1.04073	1.05882	1.01583	0.983009	0.977309	0.934123	0.892301	0.99551	0.950527	1.05225	1.00206	1.01041	1.04041	1.11979	1.06731	1.09152	1.18435	1.32224	1.31574	1.47286	1.39228	1.52998	1.47098	1.40895	1.38922	1.30412	1.24419	1.31705	1.31314	1.38739	1.39458	1.38194	1.32184
0.79182	0.726144	0.754651	0.725486	0.715257	0.676141	0.641395	0.612233	0.584956	0.571509	0.554843	0.569619	0.58024	0.52377	0.548538	0.529456	0.549628	0.534902	0.527389	0.52564	0.556434	0.590823	0.57538	0.568704	0.553288	0.571047	0.558383	0.549274	0.613485	0.649776	0.701546	0.901648	0.386429	0.341338	0.283512	0.254363	0.281979	0.815521	0.960192	0.965349	1.31727	1.2433	1.2852	1.16925	1.32113	1.40983	1.44784	1.31868	1.18191	1.11417
1.09501	1.04487	1.01376	1.04921	1.14715	1.21774	1.17803	1.22409	1.20009	1.06246	1.10791	1.16265	1.08824	0.991345	0.970429	0.996511	1.11586	1.07453	1.25669	1.27745	1.16597	1.15644	1.15289	1.10687	1.18408	1.32073	1.2988	1.35004	1.38748	1.46003	1.33975	1.26527	1.20621	1.3842	1.34015	1.43003	1.39243	1.42723	1.32234	1.2623	1.30083	1.30119	1.25513	1.29092	1.38449	1.35057	1.37831	1.06092	0.948007	1.04928
1.38811	1.43527	1.41334	1.43057	1.398	1.40915	1.39523	1.37916	1.33588	1.3318	1.27747	1.25999	1.24934	1.18673	1.18538	1.20222	1.18343	1.13224	1.15379	1.21092	1.27742	1.27101	1.32566	1.26408	1.26006	1.20335	1.09503	1.14038	1.18756	1.19398	1.23221	1.26786	1.2669	1.34959	1.39282	1.46601	1.62087	1.77629	1.83263	1.91852	1.92119	1.88999	2.03719	2.0022	1.92947	1.95417	1.63775	1.6276	1.53139	1.56332
1.18089	1.1817	1.15513	1.13421	1.17073	1.13258	1.1229	1.15339	1.10125	1.16384	1.09506	1.128	1.09559	1.08756	1.06379	1.03821	1.03657	1.05117	1.04498	1.04441	1.09607	1.05607	1.09293	1.03111	0.995188	0.968262	1.00228	1.0859	1.1592	1.20571	1.15355	1.16469	1.21551	1.27438	1.36952	1.38767	1.41577	1.52012	1.55906	1.61858	1.6072	1.47348	1.47384	1.40206	1.36443	1.3328	1.38401	1.30546	1.2865	1.20688
1.18707	1.21193	1.2074	1.28607	1.22782	1.24251	1.2655	1.27374	1.19228	1.24668	1.18136	1.13014	1.13545	1.177	1.14633	1.10921	1.09612	1.06107	1.00095	0.99724	0.963705	1.04901	1.0361	1.03965	1.06447	0.981422	1.00534	0.933343	0.869871	0.902024	0.879054	0.87603	0.871102	0.893601	0.949127	1.06588	1.10885	1.13428	1.14002	1.15878	1.15243	1.16337	1.30576	1.14404	1.10836	1.15542	1.13388	1.12074	1.0751	1.14786
1.36361	1.41974	1.40637	1.21139	1.17737	1.12491	1.03249	1.00595	0.964683	0.957211	0.908029	0.923417	0.86485	0.87361	0.893037	0.902251	0.965143	0.938525	0.939012	1.02225	1.01027	0.960668	1.00548	1.08622	1.10508	1.06708	1.11183	1.09536	1.18133	1.17133	1.1442	1.13784	1.16174	1.37671	1.50474	1.50154	1.64891	1.70966	1.78487	1.6771	1.60779	1.61633	1.6051	1.64753	1.73752	1.58894	1.68106	1.68157	1.79117	1.54955
0.951056	1.00476	1.10467	1.20422	1.24939	1.23389	1.16456	1.15807	1.07798	1.02972	1.09179	0.999938	1.03283	1.11696	1.07282	1.04966	1.00887	0.958905	1.04189	1.01661	0.986313	0.983774	0.987549	0.93499	0.884783	0.905484	0.957767	0.956019	0.978653	1.03023	1.22111	1.22203	1.09483	1.11107	1.1273	1.13063	1.08929	1.14485	1.11772	1.0915	0.993252	1.00721	0.930088	0.935545	0.924713	0.89066	0.931593	0.844816	0.915807	0.923755
1.24461	0.325644	0.359031	0.414343	0.529673	0.765811	0.924466	1.08312	1.24178	1.22134	1.19749	1.354	1.3717	1.4559	1.34098	1.46451	1.49963	1.40176	1.07401	1.08039	1.08854	1.1822	1.23418	1.18988	1.2153	1.2068	1.1954	1.1619	1.2347	1.16318	1.17265	1.07418	1.11296	1.1939	1.2367	1.36759	1.38796	1.50844	1.56479	1.71076	1.7082	1.67096	1.62663	1.45778	1.45935	1.47087	1.40889	1.00357	1.26336	1.06347
2.00843	1.85751	1.71593	1.83813	1.88926	1.99212	2.00057	1.79696	1.93012	1.77237	1.87264	1.72579	1.74844	1.65905	1.57576	1.60523	1.56192	1.43982	1.37459	1.28976	1.18499	1.33264	1.24645	1.28165	1.30182	1.38667	1.4783	1.40827	1.45109	1.40766	1.22987	1.21679	1.24014	1.45136	1.56147	1.60528	1.60035	1.70312	1.69254	1.65101	1.69596	1.39691	1.25184	1.25232	1.51235	1.09523	0.999636	0.74894	0.737437	0.848666
1.20153	1.20856	1.14332	1.11168	1.09848	1.02196	0.970778	0.940414	0.906918	0.961872	0.883239	0.918507	1.01699	1.00149	1.06604	1.00911	0.998625	0.930708	0.936499	0.857506	0.855331	0.862189	0.864216	0.788857	0.825279	0.810764	0.765756	0.801185	0.797436	0.78026	0.786028	0.852001	0.911328	1.09671	1.23835	1.32186	1.44806	1.54869	1.75872	1.85096	1.79935	1.81027	1.89395	1.83022	2.06827	1.95932	1.81704	1.70968	1.55798	1.64349
0.907887	0.95039	0.931227	0.971083	0.929161	0.974796	1.05824	1.0831	1.22299	1.16281	1.05752	1.05472	0.981367	0.962084	0.920728	0.904378	0.905993	0.872553	0.908017	0.883579	0.967531	1.08329	1.03868	1.09266	1.23341	1.07181	1.25314	1.25973	1.07541	1.14518	1.10001	1.12232	1.06657	1.18296	1.11665	1.1926	1.13147	1.02348	1.07357	1.16767	1.31133	1.39713	1.11797	1.09276	1.07965	1.22847	1.25347	1.34598	1.24218	1.14977
1.08609	1.09556	1.12452	1.17271	1.14517	1.1435	1.18838	1.2033	1.26491	1.31077	1.32291	1.33361	1.28687	1.24656	1.3849	1.3027	1.2852	1.25282	1.23326	1.28057	1.1968	1.25985	1.16579	1.19033	1.13728	1.14666	1.10604	1.09263	1.18208	1.04964	1.12128	0.948619	1.17738	0.967659	1.02883	1.46522	1.56102	1.70535	1.81018	1.88056	1.89472	1.79919	1.9032	1.93353	1.91429	1.83334	1.86033	1.69012	1.51275	1.69331
1.90166	1.8444	1.67479	1.726	1.76987	1.60557	1.6315	1.4604	1.25053	1.24234	1.0669	1.08851	1.21762	1.34154	1.277	1.18013	1.26797	1.4408	1.50684	1.66572	1.98652	1.66362	1.56149	1.43145	1.22329	1.32695	1.33449	1.34736	1.2249	1.29899	1.23096	1.25637	1.3349	1.47376	1.602	1.7971	1.83073	1.86906	1.83654	1.98341	2.05215	2.12471	1.9837	2.06894	2.03803	2.00323	2.20722	1.9824	1.87412	1.80555
1.24056	1.23736	1.2374	1.21808	1.16655	1.23358	1.25212	1.17128	1.2756	1.19261	1.22703	1.21573	1.07662	1.20866	1.17712	1.23432	1.35631	1.3287	1.29691	1.2523	1.23453	1.11837	1.13242	1.13955	1.22377	1.21993	1.17438	1.23681	1.26106	1.24079	1.1075	1.11277	1.3132	1.29633	1.37634	1.29154	1.48496	1.61472	1.61167	1.81399	1.76458	1.88485	2.02854	1.90285	1.96119	1.89765	2.05314	2.0196	1.99407	2.04127
0.57391	0.567157	0.672372	0.706214	0.710458	0.729239	0.686364	0.638488	0.638462	0.731253	0.676934	0.69275	0.716572	0.685515	0.689783	0.663589	0.678957	0.683741	0.723236	0.660791	0.634706	0.658136	0.659087	0.696883	0.676119	0.630025	0.546797	0.572248	0.508767	0.543268	0.569016	0.540899	0.584662	0.686135	0.756191	0.683595	0.747174	0.755466	0.616658	0.629607	0.579249	0.574339	0.676668	0.650901	0.677718	0.716754	0.701065	0.704956	0.702687	0.609223
2.11314	2.27392	1.77154	1.72626	1.76947	1.73734	1.82989	2.04032	1.40405	1.62629	1.71934	1.97042	1.81488	1.57883	1.2987	1.28279	1.51779	1.3881	1.54605	1.44622	1.32364	1.33285	1.10062	1.38004	1.2049	1.31098	1.32867	1.14935	1.08678	1.09224	1.14146	1.17048	1.06949	1.33088	1.34966	1.4624	1.65036	1.64608	1.44599	1.26191	1.29837	1.29712	1.24551	1.37498	1.34965	1.39661	1.45069	1.48008	1.50454	1.50488
0.931907	0.887102	0.886119	0.874398	0.828508	0.857722	0.803926	0.891192	0.995781	1.12743	1.47331	1.67303	1.93351	1.84976	1.84006	1.66811	1.48045	1.48088	1.65551	1.71511	1.62147	1.03459	0.901243	0.884452	0.855376	0.88632	0.854625	0.887502	0.910092	0.954472	0.880214	0.820108	0.989403	1.04498	1.01117	1.03143	1.06662	1.12491	1.15439	1.06476	1.05683	1.07512	1.06901	1.04943	1.04037	0.976633	1.01644	0.983939	0.933715	0.942358
0.985501	0.957133	0.989473	0.989805	0.973255	0.966081	0.998623	0.984917	0.980581	0.982445	1.00014	1.00698	0.973252	0.961753	1.0051	0.95451	0.956461	0.996563	0.965893	0.993919	0.992398	1.09219	1.03781	0.98249	1.10408	1.17757	1.37542	1.21299	1.23234	1.14127	1.16781	1.1559	1.12314	1.13524	1.1748	1.15795	1.17177	1.16316	1.14537	1.12488	1.18571	1.22166	1.24664	1.26199	1.34403	1.39274	1.33838	1.20815	1.16761	1.24737
1.24251	1.26906	1.23588	1.14349	1.06144	1.11387	1.09715	1.09343	1.1461	1.16787	1.11319	1.10335	1.07384	1.02946	1.05654	1.05372	0.994428	0.978188	0.953693	0.963556	0.979475	0.993417	1.00097	1.09209	1.1546	1.20141	1.23436	1.30801	1.27587	1.27928	1.20236	1.1398	1.05505	1.21946	1.31636	1.48086	1.57041	1.88849	1.78422	2.00454	1.9931	1.74985	1.79558	1.79116	1.65981	1.58822	1.53954	1.50177	1.59123	1.47245
0.701486	0.910736	1.15719	1.12871	1.02642	0.963213	0.916905	0.903845	0.756392	0.80858	0.947945	1.02049	1.03817	0.952744	0.867437	0.88575	0.921947	0.931295	0.83613	0.807993	0.829454	0.801074	0.797724	0.860923	0.920511	0.802854	0.899567	0.83537	0.937319	1.01557	1.11593	1.17641	1.22544	1.20237	1.03072	1.04022	1.09117	1.21103	1.20772	1.22762	1.321	1.43331	1.40031	1.54497	1.52593	1.46215	1.60229	1.5745	1.46121	1.61997
1.44633	1.36035	1.4504	1.46655	1.37282	1.45792	1.52221	1.37593	1.49501	1.52769	1.63486	1.69024	1.54447	1.59176	1.52766	1.44715	1.3509	1.40536	1.54744	1.38677	1.39345	1.3323	1.26003	1.16443	1.32059	1.34783	1.33335	1.30544	1.45247	1.32448	1.32528	1.38185	1.29205	1.22413	1.26777	1.35507	1.37614	1.45227	1.50645	1.5034	1.57942	1.35292	1.49452	1.57593	1.38198	1.27445	1.3945	1.4071	1.35463	1.44264
1.6163	1.66545	1.84098	1.67862	2.0313	1.83831	1.64914	1.69019	1.79771	1.39277	1.34016	1.36237	1.43794	1.39893	1.4103	1.36231	1.41048	1.43538	1.49776	1.68764	1.86965	1.71814	1.6899	1.56714	1.625	1.54286	1.57769	1.69333	1.63573	1.61269	1.6082	1.35891	1.69788	1.85836	1.77256	1.63713	1.79203	1.70628	1.64668	1.59555	1.46742	1.45288	1.51775	1.40237	1.51438	1.71025	1.60798	1.34906	1.60198	1.74915
1.04854	1.11995	1.07484	1.09049	1.09914	1.04244	1.10393	1.22067	1.11276	1.01342	0.999771	0.983332	0.989675	0.984619	0.94193	0.872351	0.85219	0.950195	0.882018	0.906342	0.975966	0.893361	0.840469	0.85727	0.853013	0.850145	0.82669	0.837772	0.874109	0.88224	0.841798	0.814673	0.946187	1.02192	1.06451	1.01855	1.10075	1.23369	1.21097	1.15242	1.25537	1.32433	1.18185	1.24072	1.19358	1.13821	1.19436	1.21326	1.13314	1.16068
1.2288	1.22777	1.24145	1.23147	1.19579	1.17277	1.18021	1.10809	1.16651	1.1855	1.16284	1.10667	1.11811	1.01828	1.10188	1.09359	1.05479	1.10538	1.08406	1.07747	1.1038	1.05231	1.11481	1.07507	1.0612	1.05723	1.05304	1.02515	1.0153	1.0235	0.990893	0.981895	1.00251	1.01451	1.01343	1.07662	1.03231	1.05324	1.03656	1.00043	0.949476	0.940596	0.959581	0.923746	0.895927	0.902731	0.879976	0.90184	0.877593	0.900635
1.60709	1.57521	1.61972	1.57829	1.61072	1.53791	1.50779	1.38404	1.4238	1.45244	1.23906	1.16981	1.03218	1.10712	1.27376	1.31485	1.22474	1.14931	1.08967	1.09136	1.06433	1.21946	1.31665	1.30707	1.34655	1.30849	1.30112	1.29279	1.33889	1.31454	1.22319	1.15751	1.19925	1.28589	1.31288	1.39043	1.40241	1.49689	1.47646	1.50615	1.52371	1.61915	1.53283	1.6301	1.57386	1.62777	1.48455	1.48266	1.53279	1.5551
1.94064	1.84703	2.05044	2.13494	2.08114	1.89467	1.7577	1.95623	1.96811	2.03113	1.98405	2.01361	2.23253	2.5358	2.4926	2.25901	1.99042	2.04465	1.63506	1.50153	1.59141	1.54627	1.23958	1.66633	1.66416	1.79741	1.6146	1.51126	1.71057	1.57344	1.51273	1.51316	1.49388	1.49444	1.35846	1.35059	1.33559	1.16673	1.11108	1.20043	1.23774	1.36719	1.6414	1.70715	1.48223	1.67759	1.09123	0.950944	0.813228	1.1093
1.42387	1.37262	1.38912	1.36041	1.41943	1.2601	1.32382	1.23167	1.15509	1.15554	1.03933	1.14478	1.09875	1.10676	1.0433	1.02523	1.07786	1.05461	1.08612	1.09108	1.07213	1.06166	1.0639	1.0401	1.01972	1.04458	1.06872	0.985989	1.0575	1.03801	1.03986	1.04107	1.11044	1.10531	1.1543	1.21388	1.25901	1.30106	1.31671	1.3562	1.33901	1.29794	1.32442	1.32013	1.34202	1.30073	1.27198	1.27001	1.23592	1.28066
0.593412	0.580569	0.59936	0.686684	0.656731	0.729669	0.702057	0.684341	0.660035	0.666039	0.629481	0.673964	0.623243	0.607451	0.633738	0.588896	0.558507	0.574004	0.562971	0.580833	0.537987	0.581838	0.55282	0.592435	0.561342	0.561005	0.552778	0.587525	0.595726	0.592626	0.576847	0.631332	0.659921	0.7029	0.767745	0.827729	0.866358	0.925969	0.93819	1.0094	1.1707	1.23099	1.27106	1.27414	1.238	1.25609	1.36749	1.34965	1.38101	1.46206
0.671131	0.669866	0.666362	0.716192	0.782266	1.03818	0.987426	0.957829	0.927188	0.915766	0.842132	0.849697	0.873751	0.956636	0.87056	0.816198	0.8584	0.862141	1.01161	0.918237	0.94676	1.04982	1.1295	1.06452	1.18203	1.08366	1.16449	1.15416	1.15844	1.0853	1.09319	1.03873	1.08683	1.28619	1.40899	1.59366	1.72805	1.79228	1.78017	1.5243	1.61115	1.74014	1.85051	1.76536	1.69555	1.67318	1.59616	1.66601	1.5734	1.62751
0.834433	0.923198	0.905728	0.851528	0.881854	0.844456	0.777867	0.693009	0.635992	0.67941	0.549977	0.515186	0.654636	0.692541	0.690469	0.739395	0.731948	0.739175	0.781092	0.858551	0.819579	0.76591	0.782154	0.752741	0.806272	0.751409	0.70005	0.684486	0.644893	0.666811	0.723199	0.703664	0.645975	0.935479	1.05331	0.936183	0.819057	1.03906	1.25907	1.2498	1.27322	1.30129	1.27947	1.32827	1.43574	1.46866	1.50255	1.46053	1.49111	1.44729
0.896119	0.929356	0.952589	1.006	1.05737	0.989859	1.07693	1.04742	1.06915	1.05352	1.02753	1.04892	1.00889	1.02861	1.04911	1.07943	1.05163	1.11368	1.11177	1.09075	1.18431	1.13936	1.07857	1.1375	1.16037	1.21751	1.16339	1.1788	1.17459	1.22189	1.14924	1.13643	1.18237	1.1645	1.17646	1.18843	1.27821	1.3233	1.33356	1.19986	1.14538	1.17018	1.17065	1.19448	1.29486	1.11007	1.18153	1.09262	1.07414	1.08696
1.14842	1.25488	1.30094	1.2817	1.20501	1.21562	0.977549	1.07222	1.12958	0.998678	0.954056	0.925534	0.92795	0.941432	0.971307	0.972808	0.93488	0.92338	0.906545	0.97257	0.923287	0.993022	0.974256	0.924766	0.913331	0.923401	0.932406	0.938299	0.901659	0.794591	0.867282	0.927548	0.918316	1.00679	1.08676	1.16811	1.20562	1.36252	1.39461	1.46603	1.46585	1.4367	1.44484	1.45372	1.42607	1.44406	1.54141	1.46059	1.50437	1.59081
1.12692	1.09414	1.22219	1.15908	1.10232	1.10107	1.07768	1.07712	1.06561	1.09872	1.03068	0.995114	0.963554	0.992554	0.958021	0.931075	0.923673	0.944295	0.935724	0.87394	0.866654	0.863837	0.953722	1.01464	1.0171	0.984508	1.08207	0.990543	1.03569	1.07413	1.08303	1.11326	1.05663	1.1574	1.19279	1.28569	1.29972	1.33537	1.3076	1.38117	1.30835	1.17497	1.19251	1.11102	1.11886	1.19112	1.20712	1.18661	1.12317	1.22877
1.06997	1.10467	1.11757	1.11955	1.18848	1.18166	1.1874	1.18994	1.20386	1.19248	1.20783	1.17825	1.12947	1.14116	1.16613	1.18397	1.15587	1.12658	1.11317	1.10421	1.1278	1.16513	1.17252	1.1673	1.17756	1.1918	1.17705	1.18314	1.18666	1.16834	1.20359	1.33327	1.24888	1.34983	1.38864	1.4057	1.50856	1.57822	1.63005	1.58846	1.52774	1.58868	1.61589	1.5694	1.55786	1.53981	1.51541	1.53893	1.47788	1.42949
1.21181	1.21771	1.18507	1.15321	1.11093	1.07038	1.14159	1.11928	1.12065	1.04442	1.03267	1.00486	1.07521	1.08178	1.00473	0.955719	0.931652	0.97465	0.963262	0.944223	0.894781	0.864081	0.929941	0.937685	0.921529	0.924302	0.909265	0.918092	0.891919	0.847259	0.902225	0.86189	0.882507	0.841906	0.960863	1.06916	1.19516	1.2475	1.2048	1.04476	1.22873	1.11281	1.13606	1.0831	1.02391	1.02256	1.31461	1.20604	1.18629	1.16906
1.36196	1.39688	1.35519	1.37721	1.35771	1.37474	1.42241	1.37286	1.44969	1.37965	1.26722	1.28781	1.33545	1.29875	1.33291	1.39577	1.38366	1.42687	1.54788	1.48413	1.52875	1.55676	1.46143	1.5635	1.49445	1.49982	1.39441	1.42984	1.40684	1.39828	1.41381	1.48902	1.36927	1.44091	1.41568	1.48068	1.50654	1.5736	1.40824	1.40308	1.52847	1.57034	1.46083	1.41438	1.22566	1.312	1.37188	1.2846	1.43048	1.25368
0.809077	0.879221	0.871141	0.823987	0.812489	0.767956	0.741541	0.758192	0.769025	0.759398	0.741694	0.710556	0.817587	0.857702	0.942426	0.929708	0.943492	1.02669	1.05319	1.03232	1.04061	1.06726	0.992584	1.03233	1.03718	1.16689	0.977873	1.17523	1.08644	1.1003	1.06062	1.03765	1.07393	1.25826	1.22429	1.4182	1.37738	1.4565	1.58776	1.61657	1.53963	1.64234	1.53496	1.55173	1.64708	1.54827	1.52878	1.67837	1.53424	1.40454
1.00725	1.12378	1.04688	1.02793	0.967822	0.981165	0.967986	0.877024	0.881174	0.845074	0.819244	0.897861	0.850121	0.825568	0.92818	0.908445	0.877631	0.801529	0.733011	0.717631	0.726171	0.730621	0.79838	0.78262	0.798916	0.851207	0.796079	0.818134	0.743735	0.799718	0.918396	1.08346	1.09587	1.26263	1.33312	1.48011	1.45622	1.59251	1.70849	1.5906	1.61458	1.4852	1.54482	1.60823	1.53241	1.36721	1.32532	1.37806	1.37279	1.43486
1.06932	1.12913	1.10494	1.13757	1.07004	1.04523	1.08044	1.11566	1.06339	1.12527	1.06062	1.03928	1.04207	1.05966	1.05163	1.03937	1.08497	1.13555	0.956996	1.05838	1.04252	1.04121	0.996664	0.985653	0.934521	0.931411	1.15026	1.06963	1.02528	1.0481	0.991827	0.984706	1.06202	1.13175	1.25416	1.28976	1.35206	1.2948	1.33563	1.32189	1.35856	1.27722	1.25088	1.22388	1.36426	1.3872	1.17694	1.00139	0.904066	1.02733
0.0750073	0.0416369	0.0371609	0.035492	0.0364724	0.248629	0.0759308	1.17659	1.48165	1.42143	1.22933	1.07813	0.964945	0.925118	1.00447	1.05257	1.01875	1.05463	0.874477	0.813974	0.839696	0.809533	0.689684	0.645966	0.698733	0.629713	0.531225	0.588626	0.700435	0.837965	0.803987	0.843332	1.07223	1.13289	1.2566	1.24092	1.20578	1.01035	1.11181	0.832832	1.06227	0.960765	0.869302	0.809919	0.699394	0.401354	0.811302	1.02006	1.03083	1.87271
0.921809	0.999461	0.739585	0.966988	1.10962	1.21281	1.44583	1.27625	1.48928	1.39756	1.42858	1.57598	1.22175	1.39793	1.42691	2.08954	1.09033	1.13378	1.13279	1.5658	1.45614	0.902584	1.08119	1.15746	1.35022	1.4216	0.771697	1.64768	0.826321	0.516644	0.561549	0.54339	0.915857	1.19716	1.31027	1.57408	2.23511	1.88766	2.02292	1.78508	1.7834	1.81982	1.56155	1.13269	1.43307	0.663785	0.738008	0.918843	0.829524	0.745958
1.04256	0.996596	0.955184	0.944377	0.860167	0.9585	0.984729	0.970856	0.985063	0.976427	0.985849	0.93714	0.984381	0.986577	1.09289	1.11389	1.20163	1.17984	1.29085	1.2455	1.25229	1.20595	1.09589	0.906724	0.913225	0.889499	0.912581	0.969533	0.943773	1.00538	0.952971	0.988691	1.03369	1.09378	1.17189	1.20392	1.24107	1.24463	1.29461	1.26978	1.28766	1.30448	1.27677	1.38364	1.3323	1.23765	1.22319	1.24289	1.2556	1.29081
1.36898	1.28415	1.20592	1.07883	1.07953	1.08624	1.03542	0.995781	1.00427	0.984967	1.00354	0.962874	0.942209	0.877148	0.929234	0.942745	0.961788	0.954034	1.00074	0.96695	0.986891	0.939417	0.908183	0.883027	0.971447	0.867834	0.885306	0.854909	0.874749	0.891167	0.891327	0.989708	0.979884	1.07748	1.15861	1.19672	1.3008	1.41805	1.44069	1.50172	1.46306	1.40271	1.53093	1.32185	1.33294	1.28102	1.39313	1.55351	1.57506	1.59115
1.00873	1.00028	1.10323	1.03984	0.944183	1.30627	1.30862	1.29962	1.13847	1.07375	0.950489	0.77708	0.737972	0.663349	0.723233	0.606104	0.601445	0.664561	0.836938	0.946333	0.890746	0.8879	0.880906	0.967224	0.952006	1.0508	1.17605	1.36859	1.40424	1.45155	1.51974	1.25526	1.35756	1.57537	1.67253	1.68322	1.70041	1.72067	1.60497	1.57297	1.57366	1.55857	1.58112	1.59526	1.544	1.45129	1.43738	1.17251	1.34915	1.40966
0.746373	0.807161	0.818364	0.796004	0.807551	0.813687	0.802816	0.817584	0.779467	0.783955	0.821508	0.891208	0.900219	0.952375	0.97572	0.964613	1.00745	1.02665	1.10217	1.01181	0.914443	0.879961	0.848785	0.877883	1.05431	0.861505	1.06237	0.876559	0.886527	0.837203	0.932929	0.903093	0.924359	0.937323	0.937191	0.942048	1.02106	1.06067	1.12869	1.07619	1.08239	1.12131	0.974275	1.10758	1.15764	1.13932	1.11498	1.16199	1.27419	1.2492
1.56711	1.71033	1.67281	1.64915	1.80862	1.83223	1.7802	1.6421	1.52979	1.49163	1.51271	1.33659	1.34386	1.33485	1.49936	1.31315	1.32358	1.39936	1.41759	1.39474	1.59073	1.38625	1.67069	1.63759	1.72304	1.66632	1.50366	1.55634	1.57066	1.6312	1.89194	1.93182	2.09474	1.99116	2.50905	2.67773	2.16479	2.55875	2.53443	2.30651	1.95811	1.88574	1.86697	1.9094	1.91566	1.81691	1.67244	1.62225	1.6661	1.69857
0.620289	0.688103	0.695727	0.675474	0.654579	0.698001	0.680806	0.684222	0.692609	0.700632	0.692284	0.647351	0.64117	0.622603	0.667428	0.653195	0.625983	0.609001	0.649919	0.589671	0.575324	0.590803	0.577132	0.542709	0.533384	0.565179	0.55544	0.544605	0.588833	0.598421	0.630991	0.645738	0.643677	0.624102	0.657517	0.617423	0.647878	0.691514	0.724674	0.714247	0.695767	0.706966	0.731076	0.73801	0.678076	0.708304	0.664423	0.704281	0.722241	0.707119
1.08707	1.1115	1.08988	1.1117	1.04141	1.0727	1.08644	1.08917	1.03949	1.05029	1.03139	1.06255	1.1014	1.07356	1.09278	1.09079	1.10181	1.0153	1.0255	1.06607	1.10429	1.16033	1.25588	1.13445	1.18104	1.17718	1.29412	1.24518	1.14228	1.16295	1.14988	1.09327	1.03935	1.12208	1.11737	1.18113	1.16288	1.31679	1.37062	1.38605	1.38985	1.47067	1.4668	1.45563	1.34295	1.49039	1.39163	1.45993	1.43218	1.35962
0.863856	0.896428	0.980495	0.953162	0.859068	0.841092	0.82241	0.814815	0.864926	0.857423	0.862724	0.84851	0.837839	0.851214	0.86806	0.834572	0.893946	0.889628	0.947694	0.904761	0.967427	0.917761	0.930071	0.840926	0.874426	0.877716	0.853171	0.892111	0.916591	0.873893	0.838905	0.829038	0.886803	0.959653	0.961395	0.96397	1.04727	1.16684	1.15584	1.19832	1.13883	1.06573	1.0857	1.09429	0.99171	0.98965	1.07045	0.966895	0.990333	1.08029
	1.31336	1.53766	1.62646	1.58502	1.40319	1.38111	1.24847	1.15005	1.31263	1.34559	1.32124	1.37263	1.38929	1.27298	1.28045	1.23396	1.21014	1.16197	1.19621	1.18232	1.14737	1.1413	1.15056	1.06401	1.1232	1.43349	1.1481	1.13185	1.24374	1.35036	1.45698	1.5636	1.73412	2.032	1.90437	1.95299	2.18947	1.94331	2.23437	1.79984	1.77796	1.72772	1.65194	1.73201	1.68932	1.7936	1.67562	1.72657	1.59171
	0.63561	0.959651	1.07189	1.01015	1.18329	1.16229	1.45835	1.71344	1.62844	1.59201	1.21305	1.14954	0.940303	0.822172	0.816741	0.758414	0.742171	0.749488	0.747408	0.796646	0.903111	0.978595	0.907585	0.910491	0.806173	0.794814	0.726215	0.846388	0.846292	0.951174	0.968492	0.975398	0.962571	0.991694	1.13883	1.07396	1.04614	1.10115	0.949728	0.885027	0.873348	0.90789	0.865305	0.932143	0.94789	0.900307	0.88306	0.88336	0.932211
	0.786804	0.79261	0.750911	0.893743	0.688511	0.755388	0.934416	0.778372	0.698006	0.842805	0.807184	0.908849	0.909608	1.07818	1.11015	0.95342	0.968232	0.890041	0.975149	0.959822	0.938329	0.963625	0.912869	0.874615	0.898584	0.921864	0.920266	0.912863	0.965606	0.943487	0.985357	1.09669	1.21304	1.27082	1.35345	1.42228	1.42611	1.44025	1.47181	1.44923	1.48604	1.57207	1.54324	1.56049	1.54931	1.54391	1.58068	1.54598	1.64559
		0.944809	1.09253	0.930627	1.47248	1.45003	1.30677	1.2901	1.25937	1.23884	1.32538	1.24645	1.63523	1.44632	1.13873	1.06509	0.992107	0.928632	1.1141	1.18699	1.12298	1.02827	0.97753	0.985945	1.02892	1.02608	1.00461	1.04125	1.05321	1.04085	1.03633	1.06323	1.09267	1.08862	1.11934	1.13176	1.10108	1.08379	1.20702	1.28221	1.30792	1.29562	1.17101	1.09319	1.15817	1.20045	1.15242	1.24768	1.22007
		1.23904	1.22548	1.24639	1.32288	1.32712	1.2978	1.28673	1.25133	1.30578	1.27266	1.28529	1.28771	1.24498	1.26349	1.24107	1.26207	1.27475	1.30597	1.25722	1.28043	1.28569	1.23844	1.22498	1.22462	1.23356	1.20193	1.22847	1.26041	1.25147	1.22368	1.27147	1.31356	1.42913	1.44343	1.38703	1.38907	1.37568	1.33745	1.36987	1.37835	1.29713	1.23672	1.31408	1.35526	1.35801	1.29604	1.26671	1.25129
		0.652219	0.46559	0.712907	0.701501	0.6922	0.587523	0.616317	0.691138	0.706741	0.852541	0.930905	0.973723	0.956931	0.88403	1.06722	0.977955	1.04889	0.893066	0.792722	0.902632	1.08729	0.884978	0.832628	0.9025	0.955152	1.45853	1.28912	1.33233	1.5324	1.50803	1.53292	1.71492	1.32108	1.11643	1.11422	1.54027	0.996665	1.36036	1.72405	2.14186	1.66704	1.63148	1.64002	1.95803	2.93831	2.06989	2.48249	1.8165
		0.0670547	1.12793	1.15637	1.0684	0.970941	0.975096	0.947173	0.965496	1.041	0.97755	0.950655	0.887637	0.887592	0.816876	0.850293	0.806985	0.90143	0.920075	0.799152	0.775485	0.912311	0.88761	0.865649	0.796457	0.750253	0.822761	0.854249	0.953739	0.85335	0.84565	0.803514	0.991251	1.03111	1.05598	1.21619	1.31261	1.34847	1.40146	1.49053	1.5851	1.63941	1.50554	1.38465	1.47585	1.46611	1.51039	1.54556	1.61275
		2.36552	2.43383	2.2877	2.10309	2.09929	1.9712	2.15217	2.21101	2.18292	2.26775	2.21132	1.96301	2.23147	2.24486	2.01638	2.36375	2.38807	2.04525	2.16787	2.41482	2.31435	2.0559	2.02191	2.02344	2.19074	2.07559	1.99589	2.05594	1.8824	1.81828	1.85281	1.82847	1.81827	1.95849	1.8511	2.23598	2.00333	2.01142	2.09489	2.32707	2.24225	2.45638	2.76262	2.48545	2.53564	2.69959	2.29359	2.27191
		0.591557	0.747807	0.720528	0.720106	0.750728	0.731881	0.699588	0.753633	0.741245	0.720859	0.742741	0.699244	0.712341	0.673256	0.680024	0.650917	0.655279	0.675915	0.711202	0.759358	0.815499	0.734414	0.712599	0.689961	0.683164	0.679644	0.639047	0.70562	0.71319	0.660057	0.751652	0.784748	0.755666	0.751169	0.822331	0.839896	0.894624	0.900758	1.00994	0.976	1.00131	0.982749	0.90118	0.885479	0.925233	0.983377	1.03925	0.999133
				1.43683	1.55509	1.46937	1.58678	1.86093	1.80203	1.76789	1.6873	1.5184	1.43861	1.50853	1.59506	1.53569	1.5777	1.38969	1.50949	1.55489	1.44735	1.49736	1.4341	1.41066	1.3454	1.42805	1.40299	1.46316	1.41883	1.29966	1.31656	1.37628	1.42	1.47449	1.44644	1.38507	1.43983	1.47485	1.46184	1.41893	1.55373	1.65416	1.50659	1.50108	1.49594	1.52781	1.50601	1.57788	1.53131
				1.01884	0.92889	0.880844	0.784987	0.767802	0.761255	0.730843	0.744935	0.695146	0.696952	0.720533	0.788224	0.747576	0.756654	0.706607	0.718616	0.730151	0.773294	0.757545	0.752194	0.737227	0.760157	0.755202	0.747337	0.81689	0.793051	0.782767	0.834983	0.911704	1.05215	1.15074	1.19606	1.25254	1.24324	1.18908	1.17642	1.12555	1.14052	1.09107	1.14282	1.17996	1.21183	1.26466	1.29376	1.2105	1.14377
				1.09364	1.07567	1.14157	1.17419	1.10248	1.02278	1.04773	1.02155	1.05155	0.993189	1.04247	1.13124	1.09397	1.10618	1.19887	1.14933	1.13809	1.16822	1.30012	1.16752	1.15902	1.08973	1.10027	1.22463	1.10896	1.18715	1.16706	1.10588	1.11872	1.08272	1.16824	1.01413	1.02062	1.08117	1.06425	1.0668	1.1036	1.03131	1.18142	1.21226	1.12901	1.21714	1.234	1.19818	1.08547	1.10428
						1.09741	1.04679	1.06028	1.04503	1.16245	1.19623	1.2417	1.23238	1.21731	1.13821	1.14135	1.21716	1.2086	1.28491	1.25658	1.25763	1.2071	1.1464	1.15077	1.07557	1.00577	0.994636	0.925321	0.939896	0.929713	0.982214	1.13269	1.17557	1.20413	1.30738	1.39383	1.3878	1.36407	1.44841	1.62473	1.7927	1.69846	1.85796	1.75648	1.69138	1.6767	1.67979	1.32655	1.24999
						1.24284	1.06361	1.09709	1.08664	1.06761	1.06281	1.01888	1.03835	1.05489	1.09845	1.05299	1.09442	1.09738	1.12849	1.11725	1.12774	1.11432	1.11037	1.11609	1.10533	1.17058	1.15638	1.16885	1.17539	0.963337	1.11985	0.884501	0.895274	1.08981	1.08352	0.973545	0.919883	0.853422	0.863272	0.994256	1.13632	1.37042	1.29274	1.25208	1.21604	1.17588	1.08743	0.987396	0.972722
						0.225482	0.233598	0.414331	0.99429	1.22395	1.18605	1.12152	1.00501	0.905272	0.851006	0.935514	0.959661	0.864224	0.960672	0.964155	0.922965	1.00914	1.09886	1.06328	1.24931	1.41699	1.36571	1.35382	1.13985	0.991634	1.27052	1.10968	0.94868	1.1111	1.09099	1.63206	1.73144	1.65362	1.67493	1.69624	1.50878	1.32131	1.75237	1.71039	1.32917	1.51392	1.49947	1.92626	1.98701
							0.687047	0.898604	0.887031	0.845784	0.829062	0.798949	0.803007	0.80286	0.818664	0.861566	0.856736	0.829768	0.848909	0.825314	0.825358	0.800165	0.830898	0.829009	0.768367	0.792829	0.772843	0.756807	0.747491	0.774664	0.779886	0.82554	0.966696	1.03819	1.05182	1.01502	1.05492	1.14707	1.17252	1.21183	1.15882	1.10935	1.12482	1.15336	1.17385	1.05217	0.969616	0.907675	0.86852
							0.890772	0.950044	1.02614	0.984553	0.851087	0.809398	0.796433	0.882222	0.845782	0.83764	0.852365	0.867262	0.840898	0.882454	0.830167	0.91272	0.915813	0.901936	0.878602	0.923838	0.938103	0.942687	0.943959	0.961823	0.979442	1.04371	1.16262	1.36888	1.41541	1.5506	1.51196	1.46745	1.54031	1.55148	1.56068	1.4919	1.4863	1.51907	1.56629	1.55699	1.56319	1.53792	1.57359
							1.29384	1.28869	1.03615	1.08396	1.04759	0.997951	0.961917	0.965282	0.90527	0.907397	0.931354	0.915803	0.950833	0.909137	0.889572	0.840131	0.869742	0.823034	0.9859	0.955159	0.870302	0.845569	0.789661	0.832969	0.846656	0.72064	0.878289	0.982969	1.0106	0.97267	1.09712	1.27902	1.38792	1.62918	1.66683	1.65101	1.81587	2.15298	2.10581	2.20408	2.09495	1.94636	1.95936
								0.232703	0.722029	0.668143	0.71551	0.711247	0.659494	0.636771	0.714837	0.713831	0.691265	0.666026	0.718185	0.609407	0.673277	0.720665	0.825682	0.657474	0.717872	0.6768	0.787624	0.809868	0.85706	0.847278	0.844484	0.796881	0.803761	0.900062	1.0069	0.990611	0.859289	1.20883	1.23357	1.20847	1.24624	1.33999	1.51022	1.46576	1.19147	1.38912	1.52195	1.56033	1.62375
								0.805178	1.05636	1.03935	1.24093	1.12408	1.11926	1.15503	1.00651	1.03273	1.09268	1.00484	1.10008	1.23125	1.0931	1.06363	1.03038	1.07386	0.999453	1.07595	1.05193	1.07989	1.17286	1.09328	1.13652	1.23803	1.27622	1.27716	1.38334	1.37274	1.39973	1.44699	1.36594	1.31905	1.3463	1.40754	1.39441	1.25512	1.2545	1.24844	1.22196	1.17811	1.24843
								1.53104	1.60492	1.59827	1.68812	1.45611	1.65122	1.49115	1.43365	1.40291	1.47265	1.40144	1.30114	1.38984	1.42674	1.42514	1.4135	1.43777	1.38911	1.36745	1.25296	1.31107	1.26367	1.31563	1.29243	1.40362	1.50161	1.45697	1.58986	1.58094	1.73824	1.8638	1.83205	1.94457	1.84244	1.81828	2.00476	1.74051	1.73049	1.77378	1.79468	1.63142	1.73688
								0.816485	0.548894	1.1868	1.02877	1.81021	1.14364	1.16298	1.18911	1.13381	1.5215	1.57157	0.972998	0.84047	0.925606	0.8981	0.91196	0.847612	0.933744	1.00228	1.02045	0.950011	0.993716	0.913934	1.06124	1.17662	1.37969	1.41903	1.29169	1.1799	1.15135	1.11544	1.06631	1.38389	1.47	1.50885	1.54278	1.55202	1.70893	1.60016	1.4949	1.40581	1.40902
									1.10076	1.0643	1.08698	1.09155	1.01232	1.01823	1.02649	1.05205	1.04437	1.07908	1.03078	1.09282	1.0191	1.00601	0.990689	0.947388	0.978345	0.975477	0.942766	1.05198	1.06127	1.13014	1.06363	1.04499	1.18775	1.19332	1.2103	1.26045	1.34715	1.28976	1.23195	1.30191	1.32097	1.41301	1.36724	1.3324	1.26127	1.28283	1.26979	1.29497	1.367
									0.828387	0.827616	0.862503	0.808975	0.807013	0.787377	0.776981	0.743596	0.714573	0.685927	0.684467	0.696192	0.679553	0.669097	0.67723	0.666104	0.6654	0.671816	0.643629	0.664551	0.650404	0.662834	0.655181	0.683001	0.719639	0.759668	0.783919	0.798254	0.819269	0.802761	0.81429	0.835049	0.859889	0.816555	0.860083	0.909131	0.885061	0.822594	0.836821	0.801687	0.795779
									0.967762	0.995229	1.05178	1.04851	1.0592	1.03195	1.03638	1.07994	1.07385	1.09289	1.0489	1.11003	1.10787	1.18526	1.25507	1.2352	1.23925	1.21476	1.1634	1.15677	1.12274	1.05949	1.11289	1.05842	1.2291	1.28673	1.48231	1.5385	1.64626	1.5245	1.51326	1.59784	1.62782	1.5594	1.50492	1.58771	1.62699	1.714	1.83525	1.60152	1.49695
Treatments: 0.1% Vehicle, then 10ug/mL&0.1x Ins&EAA, then Vehicle
Replicate 1
0.916028	1.0341	0.909012	0.871435	0.891607	0.887423	0.93314	0.891597	0.950124	0.85569	0.829644	0.821503	0.886741	0.949213	0.838972	0.867513	0.829187	0.827263	0.87388	0.742814	0.772998	0.756483	0.774218	0.749119	0.685183	0.698522	0.807991	0.906313	0.914535	0.773844	0.842658	1.05598	1.16827	1.2858	0.959538	0.968293	0.965939	1.07459	1.05729	1.09258	1.27633	1.33281	1.2598	1.52356	1.21181	1.29742	1.36471	1.42573	1.31882	1.48052
0.552175	0.562502	0.496388	0.5628	0.622827	0.617696	0.634446	0.574745	0.624007	0.644978	0.667046	0.642977	0.62071	0.597164	0.479772	0.568991	0.540024	0.537583	0.573623	0.576083	0.589653	0.645067	0.632224	0.569707	0.554369	0.522601	0.483813	0.486701	0.509399	0.450037	0.449457	0.476786	0.557747	0.643586	0.646339	0.651093	0.798296	0.863084	0.796017	0.884966	0.740703	0.763035	0.756125	0.742585	0.685459	0.712227	0.590441	0.391339	0.715837	0.445169
1.16176	1.08544	1.42222	1.58477	1.3447	1.3744	1.5003	1.48302	1.4553	1.48683	1.56403	1.46356	1.2777	1.2223	1.33255	1.18226	1.11066	1.01341	0.975803	0.890834	0.972522	1.0345	0.965905	0.928386	1.0561	1.0058	1.02507	1.06822	0.931286	0.858195	0.936952	0.901673	0.965293	1.06574	1.08593	1.10812	1.10449	1.18053	1.09674	1.21886	1.36391	1.41421	1.40448	1.38653	1.51259	1.38502	1.45846	1.45432	1.3554	1.32358
1.47931	1.15887	1.27138	1.62138	1.76857	1.91043	1.47952	1.32369	1.16619	1.21549	1.08753	1.0661	1.02466	0.967691	1.00419	0.991351	1.03526	0.925325	0.910968	1.02049	0.982499	0.990165	0.879739	0.813448	0.69582	0.680838	0.669677	0.699743	0.726627	0.787407	0.955789	0.991292	1.12763	1.23061	1.20453	1.33092	1.22194	1.36651	1.59332	1.63168	1.45559	1.54684	1.96147	1.35989	1.51942	1.40798	1.2209	1.26531	1.26238	1.22609
0.788128	0.85682	0.902133	0.848582	0.81587	0.858568	0.837628	0.821733	0.848041	0.846952	0.82663	0.778457	0.777569	0.778008	0.723076	0.705492	0.680718	0.708193	0.680117	0.677973	0.650946	0.65653	0.645185	0.804118	0.780528	0.908202	0.909726	0.931937	0.897445	0.996477	0.939863	1.01187	1.06119	1.26747	1.32242	1.39398	1.57328	1.50553	1.41591	1.33116	1.61102	1.16768	1.68146	1.6546	1.92812	2.13398	1.99708	2.00667	1.82127	1.93562
1.18079	1.24162	1.31186	1.33112	1.33115	1.25355	1.23179	1.22653	1.21067	1.14262	1.0802	1.06344	1.07585	1.05461	1.09173	1.06186	1.00759	1.07299	1.11818	1.12273	1.08718	1.11445	1.04496	1.05319	1.02945	1.10662	1.14729	1.18098	1.15427	1.14856	1.12696	1.09282	1.12835	1.12266	1.1107	1.20132	1.30323	1.41127	1.50664	1.37817	1.35207	1.34681	1.3847	1.3655	1.43826	1.33799	1.31812	1.24628	1.27251	1.31728
2.70428	2.3362	2.28554	2.05139	1.06156	1.72263	1.26466	1.26573	1.50458	1.78363	1.22709	1.80447	2.04653	1.79309	1.73178	1.71593	1.79283	1.41596	1.49549	1.76193	1.38903	2.01187	2.17222	1.72201	1.56771	1.63789	1.36577	0.878769	0.847532	0.745371	0.755087	0.711995	1.01569	1.01012	0.942775	0.961795	1.04544	1.10994	1.19318	0.841523	0.718367	0.552074	0.577178	0.370344	0.410438	0.472756	0.507105	0.593217	0.638494	0.780328
0.987619	0.980517	0.97333	0.963909	0.944249	0.952748	0.953278	0.936417	0.895901	0.879678	0.843617	0.845148	0.926593	0.857647	0.857829	0.862576	0.887262	0.937315	0.842162	0.929054	0.915556	0.867336	0.827079	0.828147	0.805567	0.796815	0.82994	0.830438	0.848339	0.877255	0.844161	0.834584	0.770045	0.846758	0.898417	0.881782	0.89344	0.903534	0.900222	0.875039	0.833849	0.831634	0.740076	0.738597	0.733743	0.817493	0.819518	0.81919	0.745581	0.776752
1.02703	1.03336	0.979016	0.915078	0.938485	0.861084	0.822794	0.840154	0.806245	0.810822	0.886137	0.842053	0.802187	0.828655	0.864359	0.872529	0.861193	0.873526	0.8257	0.862127	0.880886	0.875642	0.844849	0.820763	0.820249	0.887412	0.904208	0.920965	0.808054	0.878312	0.844875	0.838109	0.909041	1.15544	1.13409	1.20216	1.21146	1.10323	1.20222	1.19013	1.00379	1.09786	1.05486	1.13172	1.15216	1.06645	1.09019	1.18453	1.01132	0.961018
0.647899	0.596203	0.636381	0.613019	0.609169	0.576689	0.57433	0.568596	0.60579	0.562783	0.594291	0.568427	0.565123	0.544025	0.60876	0.564494	0.55465	0.553498	0.534678	0.583842	0.598317	0.626097	0.633228	0.590471	0.636496	0.645028	0.65706	0.712542	0.693854	0.710065	0.691969	0.609041	0.659131	0.687229	0.720215	0.735667	0.737891	0.754103	0.768883	0.814121	0.808665	0.839707	0.831385	0.869188	0.899296	0.859404	0.950095	0.964705	0.960302	0.948032
1.12802	1.11377	1.09954	1.13438	1.10419	1.06849	1.0884	0.982267	0.971955	0.983674	0.989642	0.958719	1.01616	0.936061	0.936406	0.920443	0.818813	0.85529	0.853472	0.887831	0.839358	0.860695	0.806628	0.819761	0.781038	0.791354	0.852453	0.901201	0.865927	0.81735	0.803693	0.805903	0.820381	1.09804	1.16368	1.21368	1.24113	1.23005	1.27713	1.17627	1.29102	1.16941	1.24904	1.1607	1.25119	1.15441	1.21727	1.28158	1.14113	1.10777
0.756782	0.800505	0.835486	0.80743	0.824584	0.854834	0.883577	0.815199	0.900501	0.899583	0.862142	0.828806	0.898052	0.873448	0.819509	0.898208	0.919577	0.913633	0.929446	0.861649	0.940723	0.945922	0.906921	0.843907	0.865505	0.853415	0.858878	0.882255	0.91185	0.867801	0.910293	0.867994	0.948354	1.0061	1.0718	1.17693	1.21398	1.37604	1.30826	1.30171	1.32909	1.32558	1.12868	1.11149	1.04411	1.06224	1.11906	1.10644	1.10074	1.04483
0.945653	1.00657	1.12696	1.16288	1.0437	0.954243	1.03595	1.01791	1.03044	1.15046	1.07411	0.9521	0.994786	1.08837	1.14418	1.2492	1.40145	1.65613	1.66717	1.36541	1.3771	1.16251	1.25664	1.11668	1.07964	1.11544	1.317	1.28177	1.23547	1.03375	1.01997	0.939783	0.892007	1.03004	1.15723	1.16419	1.30387	1.4624	1.40684	1.53733	1.47644	1.61025	1.74445	1.75287	1.71134	1.74711	1.72441	1.70478	1.57843	1.57809
2.08613	1.91551	2.04257	2.00714	1.7098	1.73096	1.71524	1.62575	1.63789	1.71662	1.59063	1.632	1.60529	1.78133	1.55723	1.51748	1.56132	1.59694	1.55899	1.52035	1.38368	1.41401	1.36433	1.29223	1.23393	1.24477	1.25501	1.17944	1.18808	1.12896	1.06408	1.14537	1.17985	1.34545	1.4843	1.45378	1.5964	1.77082	1.68289	1.66493	1.69131	1.62809	1.71172	1.7703	1.69403	1.68216	1.63123	1.62524	1.49272	1.54207
1.19671	1.1323	1.14653	1.12444	1.10063	1.02162	1.09635	1.05225	1.06005	1.06607	1.04881	1.02279	0.966815	0.97443	0.945317	0.972986	0.990379	0.991046	1.02264	1.01792	0.923163	0.930307	0.944089	0.976672	0.922925	0.998	1.05036	1.00423	0.914822	0.929162	0.954439	0.993305	1.0321	1.18601	1.39541	1.36107	1.56663	1.95195	1.81638	1.82875	1.81185	1.88122	1.94571	2.00993	1.99557	2.07313	2.11475	2.09191	1.95417	1.95567
1.08034	1.02675	1.05766	0.97695	1.02319	1.06577	0.905499	0.988161	0.807418	0.861856	0.747833	0.691458	0.716997	0.695043	0.690781	0.770736	0.794651	0.802702	0.824515	0.842984	0.78481	0.806545	0.928142	0.98875	0.699697	0.975122	0.930084	1.00226	0.916335	0.961269	0.941256	0.934461	0.967556	1.00089	1.05139	1.18218	1.32531	1.33192	1.29838	1.34593	1.47598	1.5938	1.5665	1.7079	1.76997	1.66031	1.50114	1.42422	1.50543	1.51723
0.850192	0.830227	0.798664	0.777696	0.79667	0.818816	0.795781	0.88701	0.900237	0.841707	0.770486	0.737372	0.753189	0.7323	0.731402	0.714891	0.693531	0.712239	0.670344	0.656023	0.685724	0.641595	0.643555	0.669734	0.655628	0.69131	0.697408	0.702209	0.716122	0.706143	0.719371	0.700731	0.755149	0.828489	0.829101	0.807492	0.825883	0.776763	0.851839	0.862468	0.827274	0.808792	0.775044	0.771364	0.785335	0.772888	0.808192	0.793776	0.827801	0.779728
0.833268	0.776115	0.821563	0.791784	0.828773	0.848734	0.910474	0.937855	1.03458	1.03408	1.077	1.11009	1.17778	1.20722	1.22094	1.13863	1.06024	1.09456	1.04487	1.09271	1.21384	1.26146	1.10838	1.12838	1.21964	1.26261	1.23783	1.11843	1.13228	1.02079	0.883154	0.930611	1.05196	1.46395	1.55751	1.55312	1.52818	1.74678	1.77433	1.97389	2.1786	1.97132	2.04978	2.06993	2.24621	2.40217	2.44551	2.22531	2.12147	1.86995
1.07663	1.07454	1.2141	1.17341	1.17514	1.15022	1.10819	1.08462	1.14046	1.13389	1.128	1.10221	1.14304	1.20646	1.17264	1.07711	1.01793	1.08533	0.981552	0.963102	1.04782	0.869109	1.05634	1.01446	1.13918	1.02255	0.982813	0.971026	1.05166	1.08196	1.14075	1.1504	1.12033	1.27037	1.30795	1.31954	1.42324	1.56335	1.49251	1.60827	1.61388	1.52677	1.47447	1.5643	1.53906	1.32354	1.2344	1.32356	1.35751	1.32703
1.32665	1.33217	1.2814	1.40337	1.23577	1.21163	1.22105	1.15402	1.10447	1.00528	0.873494	0.839084	0.911352	0.932328	1.02024	0.908787	0.816103	0.752281	0.725402	0.745185	0.80454	0.723123	0.809963	0.775979	0.735304	0.800789	0.793549	0.794111	0.761617	0.853202	0.881841	0.954361	1.04952	1.32293	1.41748	1.43393	1.42873	1.47241	1.58977	1.70021	1.50534	1.46203	1.57069	1.53644	1.6	1.6331	1.29158	1.37971	1.33552	1.37844
1.17526	1.12305	1.13815	1.13348	1.18511	1.19538	1.23029	1.21703	1.29811	1.29386	1.2921	1.31053	1.29773	1.29454	1.3087	1.28963	1.17934	1.1295	1.05341	0.957693	0.999234	1.09241	1.1416	1.12157	1.1033	1.09611	1.13326	1.10054	1.13053	1.12362	1.07016	1.11924	1.07529	1.36976	1.56991	1.72949	1.89734	1.84811	1.79335	1.91232	1.90813	1.81705	2.05828	1.8521	1.91716	1.82984	1.80098	1.93654	1.87191	1.94257
0.87378	1.11484	1.17797	1.07625	1.14138	1.14417	1.0415	1.01604	1.03931	0.935318	0.961482	1.01572	1.06217	1.05335	1.03125	1.08022	1.20028	1.17055	1.16559	1.14669	1.08839	1.0231	1.02919	1.05036	1.02619	0.906554	0.877145	0.864668	0.905425	0.829758	0.870966	0.856075	0.858187	0.918415	0.935278	1.0365	1.06702	1.10067	1.03017	1.06823	1.06053	1.11807	1.00038	1.03382	1.03785	1.12814	0.972299	1.04271	1.03599	1.30365
1.20688	1.17187	1.13538	1.08214	1.08183	1.05326	1.12538	1.09338	0.987094	1.00269	1.01732	0.992034	1.07922	0.987489	0.979363	0.973573	1.04927	1.02653	0.978567	1.05283	1.02526	0.897564	0.972766	1.0697	1.11021	1.12549	0.993857	1.04267	0.992268	0.991668	1.02509	0.947486	1.18263	1.65526	1.77047	2.23331	2.50823	2.79727	2.45939	2.47638	2.9463	2.75959	2.30116	1.81528	1.93503	1.66576	1.38068	1.50491	1.51648	1.69697
1.21507	1.15831	1.18209	1.14462	1.20692	1.20697	1.23895	1.27281	1.20671	1.19783	1.08657	1.07284	1.05525	1.0528	1.04248	1.01507	0.973401	0.925872	0.903701	0.851438	0.863956	0.851214	0.868152	0.847006	0.858896	0.855723	0.872041	0.883525	0.804357	0.837207	0.877331	0.920122	1.00477	1.20619	1.41339	1.44704	1.50455	1.47566	1.51434	1.52499	1.63759	1.58586	1.54442	1.67297	1.70696	1.80391	1.844	1.84133	1.60514	1.6697
0.616839	0.595022	0.631451	0.674735	0.649607	0.663517	0.680575	0.671707	0.713344	0.693809	0.677512	0.675374	0.691222	0.702687	0.675786	0.6485	0.633733	0.604885	0.621005	0.64204	0.63537	0.652868	0.616007	0.635413	0.670603	0.671482	0.631006	0.630429	0.626474	0.601849	0.620619	0.634037	0.608145	0.725586	0.790687	0.879755	0.891083	0.855654	0.845922	0.861519	0.906378	0.867862	0.873867	0.890676	0.918091	0.96494	0.972695	1.00249	1.02543	1.06129
0.830063	0.808211	0.767567	0.807605	0.797636	0.798059	0.818249	0.738148	0.775251	0.791715	0.809788	0.835798	0.875025	0.8217	0.843431	0.904562	0.87861	0.906068	0.86546	0.875888	0.912206	0.960593	1.03808	0.986909	0.959403	0.977636	1.02684	1.00371	0.984977	0.935395	0.980092	0.968927	1.05255	1.2811	1.39832	1.54251	1.61276	1.75791	1.7582	1.76083	1.7717	1.71025	1.74496	1.88026	1.9068	1.81753	1.81657	1.75752	1.58212	1.70396
0.781424	0.844309	0.756418	0.821983	0.839973	0.821666	0.868548	0.893595	0.819318	0.78775	0.82267	0.829784	0.843432	0.811876	0.918516	0.912111	0.858161	0.792403	0.870178	0.814242	0.864849	0.820343	0.893833	0.83974	0.857795	0.853192	0.899339	0.901385	0.820881	0.819347	0.859249	0.859977	0.918543	1.06495	1.1947	1.29722	1.19067	1.23745	1.18168	1.22878	1.21569	1.29045	1.30627	1.23872	1.27974	1.22956	1.18825	1.19443	1.23173	1.24708
1.16803	1.00289	1.00856	1.07654	1.0116	1.04475	1.14264	1.13283	1.11706	1.18198	1.23243	1.19074	1.36155	1.33223	1.27272	1.2354	1.27234	1.32688	1.33519	1.26049	1.41427	1.34633	1.30807	1.28482	1.13312	1.29148	1.21977	1.22116	1.14955	1.24874	1.28428	1.25622	1.2122	1.34277	1.35477	1.40519	1.37884	1.30681	1.21986	1.27973	1.19256	1.24732	1.12059	1.14247	1.02044	0.987767	1.02451	1.04411	1.01902	1.18187
1.42452	1.41349	1.58532	1.56802	1.45249	1.27302	1.44874	1.35681	1.30043	1.25812	1.11551	0.976188	0.866742	0.931913	0.778867	1.23289	1.25221	1.0966	1.03564	1.1666	0.645477	0.616076	0.814446	0.819909	1.01689	0.923464	1.14736	0.950863	1.11469	1.12019	1.01248	0.909347	0.973062	1.1061	1.119	1.00925	1.03402	0.991979	1.00211	0.98912	0.935567	0.974381	0.960292	0.795416	0.805679	0.869169	0.784652	0.754019	0.757522	0.894968
1.95485	1.61218	1.74884	1.81563	1.5757	1.45858	1.4134	1.05059	1.15317	1.19862	0.925478	1.1647	1.06968	0.960388	1.10655	1.09049	1.11404	0.959768	1.11006	1.1562	1.11963	1.10949	1.0437	0.938079	1.05681	1.03222	1.1562	1.0114	1.01379	1.04821	0.98342	1.73538	1.86811	2.32871	2.34813	2.09476	2.08342	2.17104	2.01835	1.60198	1.70375	1.74996	1.54083	1.34419	1.51351	1.58956	1.21541	1.40952	1.34664	1.29348
1.04236	1.06966	0.94886	0.861255	0.838596	0.817491	0.786351	0.769586	0.789053	0.839856	0.857004	0.879546	0.872484	0.885225	0.936677	0.881021	0.969571	0.99235	0.96782	0.90554	0.882801	0.887763	0.923018	0.945126	0.872502	0.932455	0.927461	0.855712	0.880968	0.907149	0.96664	0.883302	0.911582	0.990345	1.12612	1.24655	1.33831	1.3244	1.45678	1.53777	1.71937	1.43603	1.18326	1.39889	1.46825	1.37377	1.49445	1.44345	1.31671	1.25165
0.946647	0.963838	0.938931	0.979252	0.935262	0.922941	0.989603	0.928778	0.971157	0.913397	0.888335	0.922538	0.877049	0.837452	0.82251	0.765523	0.724357	0.732365	0.681403	0.681445	0.68876	0.662556	0.680331	0.653115	0.612591	0.651356	0.65642	0.659632	0.657514	0.670315	0.641573	0.652337	0.739052	0.954334	1.11624	1.16808	1.19221	1.3592	1.32134	1.34326	1.37074	1.4202	1.41972	1.47044	1.43232	1.30968	1.31841	1.31111	1.29525	1.30524
0.740494	0.687712	0.683568	0.640014	0.655694	0.59833	0.761106	0.748809	0.736549	0.756329	0.77708	0.779908	0.765575	0.807684	0.710968	0.64197	0.688668	0.712492	0.650154	0.683757	0.699503	0.690374	0.742479	0.703119	0.693963	0.690953	0.717881	0.69985	0.765445	0.798831	0.798225	0.775816	0.695931	0.8563	0.935241	1.1271	1.23183	1.22546	1.2519	1.21074	1.15851	1.1088	1.16159	1.03786	0.983352	1.0641	1.08944	1.09433	1.07542	1.05112
1.61364	1.49322	1.26827	1.30861	1.2469	1.24705	1.2648	1.16528	1.36363	1.21134	1.26092	1.12733	1.07064	1.04783	0.981861	1.10627	1.02524	1.05363	0.967758	0.97133	0.975376	0.990771	0.891505	0.896183	0.907032	0.943747	1.01642	0.928657	0.970434	0.931187	0.88258	0.887684	0.887502	1.07836	1.1935	1.29684	1.39457	1.52805	1.50826	1.417	1.47713	1.57745	1.53423	1.62431	1.48503	1.48125	1.55388	1.56816	1.52615	1.39158
1.02535	0.919673	0.92703	0.964389	0.9872	1.07746	1.07478	0.963598	0.987978	1.02612	0.992103	0.975483	0.907967	0.929209	0.990129	0.967383	0.954173	0.896387	0.946973	0.814699	0.846597	0.80792	0.869957	0.740349	0.793903	0.755379	0.794936	0.755511	0.819315	0.868922	0.93661	0.948399	0.984273	1.16118	1.3111	1.35298	1.40956	1.43759	1.44088	1.46686	1.344	1.26732	1.3778	1.32923	1.2991	1.42123	1.37202	1.42914	1.4173	1.69953
0.806578	0.811066	0.797125	0.786588	0.742521	0.692036	0.678218	0.688078	0.70396	0.651016	0.616308	0.595715	0.620778	0.624304	0.628186	0.602551	0.633388	0.646261	0.630025	0.616133	0.613185	0.592473	0.630873	0.657763	0.638337	0.650493	0.702238	0.688434	0.641906	0.644201	0.608723	0.591192	0.656145	0.728151	0.814924	0.869765	0.927533	0.993435	1.01503	0.945513	0.839985	0.948607	0.981271	1.04025	1.03284	1.0583	1.01042	0.983939	0.976583	0.969752
0.86954	0.818256	0.739042	0.736245	0.749159	0.782424	0.768078	0.752108	0.687928	0.658468	0.667243	0.642126	0.676443	0.699788	0.728517	0.725741	0.649011	0.682131	0.679448	0.672614	0.699306	0.701625	0.754267	0.647921	0.569162	0.547103	0.582549	0.521339	0.508943	0.500482	0.533652	0.529296	0.557949	0.688659	0.75602	0.787017	0.787088	0.824359	0.794603	0.862791	0.863814	0.875771	0.866483	0.874441	0.87296	0.861872	0.865893	0.879805	0.908133	0.916733
0.809341	0.783025	0.810624	0.82533	0.822951	0.808052	0.797094	0.789673	0.806994	0.767907	0.721356	0.76817	0.780926	0.793311	0.742775	0.764632	0.766229	0.798329	0.775833	0.788539	0.789794	0.81773	0.81351	0.847982	0.825734	0.886529	0.866926	0.88533	0.91681	0.919335	0.952145	0.944852	0.9236	1.0031	1.13261	1.32049	1.45917	1.54025	1.58729	1.73213	1.71645	1.93783	2.03084	1.95996	2.05162	1.94521	1.74359	2.13095	1.72115	1.91829
0.739677	0.743596	0.752224	0.729578	0.747152	0.717406	0.71524	0.692048	0.680499	0.653074	0.628609	0.643823	0.634344	0.652203	0.672769	0.654037	0.61642	0.5998	0.617965	0.625125	0.621904	0.618419	0.591095	0.587904	0.592591	0.593017	0.620351	0.665563	0.618012	0.56521	0.549018	0.558298	0.585508	0.711963	0.814441	0.890526	0.950985	0.945878	0.993317	0.960236	0.949739	0.961161	0.924963	0.923614	1.01568	0.977029	1.01998	1.04397	1.07294	1.07614
0.806463	0.815004	0.79542	0.795315	0.766044	0.757923	0.796361	0.935989	0.891848	0.824354	0.780676	0.783937	0.75345	0.718033	0.716145	0.665727	0.660319	0.661832	0.654359	0.639393	0.673157	0.63926	0.628962	0.621814	0.582734	0.619729	0.602632	0.601965	0.606519	0.620321	0.62389	0.639416	0.664252	0.736182	0.762927	0.906259	0.910655	1.05437	1.07189	1.14029	1.25995	1.19611	1.20614	1.26024	1.25577	1.15701	1.11186	1.22766	1.19769	1.31156
0.939283	0.966587	0.969273	0.999767	0.958905	0.938944	1.01429	0.953998	0.929634	0.969232	0.906209	0.907274	0.909615	0.90255	0.92133	0.94884	0.964689	0.958925	0.958089	0.88834	0.96664	0.97342	0.935217	0.947034	0.929033	0.936955	0.917996	0.887498	0.931304	0.928907	0.930221	0.939908	0.998386	1.38642	1.47046	1.72471	1.76055	1.79509	1.9493	1.85263	1.78982	1.91165	1.79214	1.88924	1.76843	1.81066	1.79106	1.75834	1.6546	1.59986
0.742711	0.755566	0.816315	0.708906	0.684367	0.75886	0.730902	0.789512	0.803565	0.817771	0.835583	0.754044	0.775315	0.776805	0.764351	0.74074	0.746304	0.755813	0.77005	0.721814	0.707	0.728206	0.72744	0.713257	0.751235	0.733901	0.795165	0.788705	0.854621	0.841099	0.779514	0.847207	0.86216	0.919903	0.870308	0.924458	0.955438	0.964315	1.08115	1.08295	0.874732	0.934414	0.885142	0.948877	0.889665	0.923334	1.07501	1.01572	1.04745	1.02869
0.756241	0.775542	0.777532	0.78518	0.82351	0.841872	0.789742	0.861936	0.876506	0.907692	0.816854	0.795069	0.837453	0.803127	0.81793	0.76666	0.771136	0.735623	0.650202	0.629396	0.571507	0.555918	0.518049	0.577782	0.608511	0.616901	0.617692	0.605268	0.569161	0.55076	0.481454	0.37595	0.474481	0.522443	0.557058	0.50635	0.442522	0.365476	0.322299	0.284994	0.291051	0.262518	0.278348	0.252224	0.257904	0.284202	0.315775	0.288165	0.287145	0.270997
0.899857	0.902504	0.829594	0.812958	0.851898	0.81653	0.827154	0.87408	0.835696	0.825964	0.836839	0.798373	0.784875	0.76318	0.738355	0.714337	0.667538	0.625234	0.620386	0.606069	0.623664	0.572842	0.517174	0.49071	0.480411	0.443381	0.430465	0.42416	0.46364	0.467716	0.484256	0.48937	0.585145	0.693594	0.741071	0.760777	0.78417	0.851298	0.931235	0.868905	0.833541	0.889835	0.835327	0.762578	0.653149	0.689043	0.578764	0.43588	0.384561	0.406267
0.815159	0.757859	0.695684	0.675341	0.693516	0.715534	0.745445	0.680308	0.677797	0.677334	0.651537	0.650021	0.655452	0.63639	0.63038	0.597184	0.639173	0.662034	0.725818	0.625027	0.591223	0.757402	0.745669	0.728744	0.645507	0.583903	0.604588	0.616731	0.651954	0.60741	0.601919	0.562653	0.612252	0.716317	0.780424	0.831338	0.958902	1.03776	1.07827	1.03532	0.948013	0.95119	0.952199	0.936578	1.08203	1.25069	0.400609	0.311525	0.345193	0.358571
0.488183	0.456941	0.4782	0.468921	0.46663	0.440174	0.426477	0.446473	0.444227	0.451583	0.448031	0.464427	0.451389	0.423679	0.389494	0.388132	0.377312	0.39996	0.416013	0.442141	0.417088	0.430661	0.420558	0.392931	0.396049	0.406418	0.408993	0.402953	0.399243	0.403001	0.405119	0.420791	0.419375	0.457844	0.513695	0.534917	0.550943	0.572577	0.635151	0.640849	0.677316	0.639273	0.672388	0.740928	0.975749	0.643997	0.309531	0.239043	0.285025	0.346196
0.632111	0.645964	0.690292	0.67933	0.678814	0.643244	0.670802	0.673101	0.624583	0.601003	0.598467	0.599478	0.621884	0.614296	0.590515	0.590006	0.583192	0.576865	0.578783	0.571815	0.552454	0.582413	0.575063	0.570682	0.549867	0.519469	0.536608	0.561628	0.541415	0.525389	0.506363	0.505287	0.522892	0.635486	0.739667	0.788733	0.831941	0.87301	0.930936	0.985955	1.01688	1.0682	1.03932	1.11516	1.07827	1.16433	1.17645	1.27404	1.51783	0.22808
0.803752	0.777552	0.692073	0.72542	0.668622	0.660659	0.699403	0.762593	0.71443	0.693551	0.713969	0.647375	0.984907	1.17379	1.08154	1.09716	1.00378	0.946426	0.905395	0.807565	0.899828	0.814266	0.83228	0.82779	0.935598	1.00129	1.03393	1.17668	1.01113	1.02283	1.00145	0.996239	1.04804	1.11995	1.33171	1.42939	1.3448	1.49609	1.61676	1.63989	1.72038	1.77184	1.33842	1.59009	1.60183	1.60324	1.68906	1.86631	1.57475	1.581
1.40816	1.25985	1.11594	1.04239	1.02791	0.908178	0.82455	0.811667	0.810717	0.793677	0.750825	0.686557	0.64792	0.726496	0.745716	0.745848	0.797214	0.763174	0.691314	0.607815	0.560235	0.538892	0.565548	0.617573	0.594167	0.578678	0.629854	0.716905	0.903221	0.844347	0.826009	0.814028	0.814194	0.889676	0.893088	0.896448	0.921084	0.852391	0.917625	0.969331	1.01702	0.950966	0.927023	0.968545	1.00758	1.03215	1.05672	1.01506	1.01432	1.46963
0.827548	0.783148	0.801389	0.765113	0.769925	0.724597	0.716878	0.721587	0.718974	0.789238	0.756602	0.774818	0.795815	0.777587	0.799354	0.731037	0.745483	0.699735	0.684405	0.668701	0.669891	0.61694	0.612257	0.622386	0.613326	0.609705	0.607322	0.552944	0.586622	0.603799	0.616751	0.615271	0.690301	0.836239	0.979516	1.01814	1.147	1.29289	1.56473	1.49443	1.58536	1.61122	1.37491	1.41324	1.45414	1.32503	1.60829	1.56457	1.74227	1.77719
0.991051	0.980904	1.05831	1.03862	1.03119	1.06545	1.12362	1.11966	1.12929	1.13287	1.16807	1.16002	1.09546	1.08837	1.08708	1.00502	1.02899	0.988825	0.91816	0.908363	0.898646	0.932234	0.868293	0.793961	0.825344	0.813696	0.804269	0.79483	0.819824	0.847434	0.835048	0.786829	0.89823	1.11981	1.33605	1.40139	1.44497	1.61419	1.66003	1.60294	1.66939	1.77213	1.83673	1.90237	1.8228	1.80313	1.78791	1.90721	1.77005	1.82601
0.800133	0.716445	0.766186	0.785009	0.863446	0.83508	0.803423	0.774991	0.798507	0.820334	0.803448	0.836776	0.946816	0.872953	0.821337	0.72475	0.706137	0.747122	0.752537	0.713638	0.768242	0.747604	0.722626	0.739207	0.741748	0.727815	0.748963	0.742466	0.717736	0.731413	0.760302	0.743517	0.769577	0.778545	0.714468	0.788806	0.826927	0.74775	0.728082	0.701283	0.702555	0.720527	0.697061	0.734123	0.70036	0.661251	0.666779	0.713964	0.700946	0.705117
0.945275	0.840698	0.821669	0.83302	0.892723	0.87337	0.924539	0.959647	1.04106	0.985259	0.984482	0.929127	0.930455	1.05763	1.02683	0.991045	0.971329	0.979854	1.01583	0.981755	1.01552	1.07273	1.0366	0.976204	0.979684	0.976343	1.01649	1.04063	1.01682	1.02051	1.06823	1.03501	1.08842	1.13773	1.27518	1.43687	1.54209	1.53319	1.59377	1.5959	1.5729	1.41301	1.34389	1.37331	1.56448	1.33585	1.5278	1.4344	1.15551	1.19132
0.91018	0.951015	1.11104	1.07001	1.08514	1.09388	1.08944	1.14077	0.967439	0.992646	0.997539	1.09503	1.10142	1.14071	1.17205	1.19056	1.15382	1.17393	1.15274	1.11822	1.05111	1.05387	1.09764	1.02285	1.02197	0.975891	0.894168	0.939319	0.879188	0.965455	0.908671	0.903498	0.964005	1.17534	1.27046	1.43565	1.41632	1.40261	1.38595	1.33215	1.36642	1.37383	1.26902	1.22881	1.21772	1.31279	1.38462	1.3122	1.19223	1.20162
0.757883	0.672147	0.766234	0.689603	0.69357	0.699866	0.708918	0.704728	0.724271	0.811359	0.897462	0.94395	0.987099	0.922632	0.841383	0.815898	0.861088	0.751566	0.729429	0.732391	0.77112	0.76344	0.726582	0.690611	0.65926	0.658103	0.550082	0.647942	0.650897	0.699722	0.764274	0.665472	0.708012	0.884964	0.930491	1.0135	1.13709	1.06789	1.10276	1.01972	0.956797	0.924499	0.929897	0.888022	0.915131	0.986451	1.12509	1.10716	1.03092	0.96449
1.04241	1.00522	0.980383	0.97705	0.977242	1.00519	1.01321	0.983285	1.03647	1.04839	1.0411	1.17029	1.1325	1.23566	1.21902	1.27863	1.19253	1.11985	1.10319	1.0891	0.98363	1.02943	0.988934	1.02549	0.98555	1.02999	0.96614	0.983036	0.976653	0.918842	0.859334	0.861675	0.998627	1.21766	1.29808	1.44596	1.39043	1.58505	1.52249	1.59693	1.56905	1.56013	1.38025	1.33305	1.34315	1.58689	1.4711	1.82413	1.82983	2.06797
0.992259	0.947074	0.987756	0.959964	0.981347	0.952313	1.0075	1.00627	1.04428	1.10656	1.021	1.04935	1.03411	1.01669	1.00163	0.985143	0.953762	0.952542	0.957148	0.941152	0.961538	0.993968	1.08335	1.02844	1.04205	1.07271	1.03991	0.996439	0.938187	0.885631	0.923791	0.865318	0.92353	0.965103	0.978285	0.984525	1.01035	0.975226	0.965116	0.986349	0.955167	0.972065	0.911875	0.858884	0.86047	0.935612	0.939238	0.96058	0.97471	0.989806
1.36325	1.45572	1.22431	1.39345	1.33214	1.28526	1.24693	1.07779	0.952107	1.02726	1.01273	1.01216	1.07009	1.09784	1.00033	1.03058	0.974111	0.981078	0.977818	0.937888	0.944647	0.901069	0.76581	0.796269	0.852407	0.861569	0.853646	0.873808	0.867775	0.854552	0.837456	0.804582	0.86896	0.998897	0.977715	0.995385	0.9868	1.05244	1.06667	1.00471	0.974364	0.862241	0.858323	0.872494	0.852637	0.851034	0.844546	0.825416	0.842752	0.793374
1.16338	1.09724	1.12707	1.05608	1.02885	1.00284	0.98413	0.996394	1.07011	1.05893	1.0717	1.08589	1.05201	1.06792	1.04436	1.07924	0.994811	1.0652	1.10109	1.01918	1.10303	1.15532	1.17015	1.20884	1.20574	1.1818	1.23107	1.2136	1.18454	1.19681	1.1495	1.13875	1.12133	1.0626	1.02761	1.13086	1.12089	1.24139	1.26979	1.40014	1.51762	1.62617	1.5337	1.52936	1.32001	1.31051	1.27201	1.35518	1.33929	1.41899
0.969731	1.0637	0.989285	1.15513	1.14781	1.15352	1.12697	1.15179	1.13586	1.03366	0.944488	0.905874	0.901594	1.02025	0.908286	1.0307	1.00454	1.02533	1.01804	1.07913	1.13544	1.18553	1.15422	1.12135	1.07821	1.10489	1.0204	1.0317	1.1164	1.18184	1.20237	1.12975	1.03334	1.32089	1.72085	2.0256	1.76173	2.12197	2.06562	2.25654	2.35855	2.42838	2.3207	2.23533	2.26878	2.27096	2.12514	2.32917	1.92258	2.09956
0.979021	0.935148	1.00888	0.964991	0.935343	0.949582	1.00968	0.971526	0.963191	0.998335	0.977139	1.00708	1.01067	1.02466	0.968891	0.995305	0.986809	0.940474	0.947046	0.920711	0.907026	0.894861	0.888764	0.901898	0.88475	0.873187	0.891086	0.827762	0.849413	0.832117	0.773292	0.758507	0.793384	0.918375	1.00317	1.08874	1.15512	1.17757	1.24743	1.24473	1.31658	1.29766	1.31592	1.37003	1.4212	1.44588	1.33202	1.33314	1.28331	1.34112
0.940896	0.872302	0.854223	0.870877	0.845837	0.824502	0.811748	0.799419	0.824568	0.79419	0.8095	0.808561	0.817535	0.88259	0.900152	0.999839	1.09589	1.01653	0.935092	0.950464	0.856505	0.834693	0.831222	0.798591	0.7282	0.791324	0.989814	0.940051	1.2422	1.36766	1.39238	1.3875	0.815754	0.990961	1.40632	1.56587	1.50278	1.31818	1.51768	1.5261	1.75627	1.79698	1.54327	1.56975	1.47796	1.72529	1.10981	0.966669	0.90762	0.891536
0.639589	0.659071	0.613729	0.584567	0.572244	0.563417	0.601559	0.591288	0.585699	0.590157	0.627649	0.679127	0.657701	0.633598	0.688798	0.609779	0.597537	0.618184	0.570584	0.616024	0.557128	0.566195	0.526871	0.520819	0.561056	0.544073	0.546723	0.615564	0.570049	0.560318	0.58151	0.623033	0.732949	0.824871	0.947331	0.980726	1.02848	1.00434	0.985598	1.0718	0.991206	1.02108	1.0048	0.973535	0.985655	0.923994	1.01144	0.965434	0.897037	0.984896
1.48874	1.4317	1.39567	1.32117	1.38157	1.31266	1.28473	1.32482	1.33234	1.4323	1.41999	1.42155	1.43153	1.36952	1.3369	1.33076	1.19369	1.10565	1.09706	0.96869	0.965688	1.09914	1.29002	1.23678	1.21388	1.25963	1.3435	1.27724	1.22937	1.29089	1.32399	1.27317	1.43003	1.66405	1.94327	2.0175	2.27208	2.20371	2.14677	2.31359	2.44613	2.58719	2.44749	2.49432	2.41075	2.35282	2.34957	2.43312	2.36041	2.19908
2.17053	1.99221	2.17583	2.24012	1.94546	1.99362	2.15353	2.20544	2.54679	2.80356	2.64819	2.66206	2.52298	2.45877	2.02602	1.82929	1.90701	2.08452	2.05531	2.15482	2.16854	2.05989	1.84264	1.91808	1.81168	2.0283	2.01356	2.18828	1.96902	2.1615	2.45128	2.15331	2.35769	2.15116	1.99108	1.94381	2.0138	2.02645	2.29065	2.25464	2.14905	1.77697	1.34165	1.34098	1.25068	1.1564	1.2099	1.66481	1.69426	2.01068
1.01433	0.961511	0.837434	0.886262	0.9266	0.959402	0.906531	0.89475	0.921254	1.00635	0.930476	0.873826	0.871183	0.835299	0.825645	0.829999	0.802709	0.881258	0.836045	0.873992	0.842446	0.896973	0.922143	0.809587	0.855	0.880636	0.961119	0.908905	0.938255	0.882294	0.847964	0.848652	0.868982	1.02022	1.10102	1.30603	1.29689	1.32789	1.3178	1.22239	1.23072	1.30542	1.32325	1.37564	1.35163	1.33663	1.44983	1.4115	1.4165	1.44681
0.841083	0.934959	0.788358	0.796146	0.747612	0.860219	0.987027	1.17547	1.22609	1.51761	1.325	1.43885	1.10373	1.0079	1.06708	1.10628	1.071	1.37097	1.40698	1.4296	1.33066	1.35984	1.36133	1.13158	1.17797	1.14637	1.251	1.07825	1.06716	1.0112	0.953424	1.05572	1.00165	1.16872	1.46501	1.17189	1.17845	1.13193	1.37235	1.50296	1.62236	1.40768	1.18819	1.54285	1.54103	2.02048	1.73412	1.82104	1.5819	1.46978
1.19178	1.11566	1.03512	1.13173	1.31063	1.37711	1.12822	1.26257	1.0454	1.03001	1.10924	1.04989	1.08643	0.893204	0.860916	0.830337	0.80227	0.800594	0.792815	0.711536	0.814456	0.710601	0.807024	0.782305	0.827495	0.821774	0.818761	0.849852	0.854571	0.93974	0.890045	0.888942	0.973354	0.957069	1.15924	1.3336	1.46095	1.74601	1.55238	1.40059	1.30379	1.11886	1.00429	1.0676	1.0401	1.20904	1.24857	1.39743	1.65688	1.47624
0.797978	0.784328	0.784493	0.746909	0.731237	0.733484	0.710148	0.844986	0.831608	0.777323	0.771712	0.756995	0.769289	0.747232	0.773365	0.748216	0.729573	0.719281	0.756849	0.735466	0.715392	0.702871	0.722423	0.724643	0.740795	0.750536	0.760953	0.796607	0.827341	0.804765	0.794225	0.774994	0.843827	1.05436	1.1613	1.25277	1.26995	1.38982	1.46844	1.39458	1.40837	1.46204	1.40278	1.45389	1.4992	1.47308	1.55533	1.54985	1.5322	1.33831
0.593109	0.632281	0.571481	0.623943	0.65067	0.669055	0.635215	0.61003	0.535348	0.535634	0.545054	0.529198	0.535695	0.545184	0.548186	0.516693	0.582836	0.570008	0.60514	0.578047	0.574345	0.583674	0.649462	0.581283	0.615388	0.563847	0.621278	0.640055	0.634828	0.617152	0.636158	0.625277	0.651923	0.733825	0.733079	0.717649	0.707823	0.708906	0.691864	0.715454	0.73183	0.734857	0.753025	0.768632	0.775622	0.764202	0.749681	0.783929	0.811425	0.808851
1.11816	1.05368	1.10247	1.0974	1.06399	1.08853	1.07203	1.03615	0.977184	0.960183	0.955497	0.937217	0.912085	0.927619	0.946371	0.920512	0.974483	1.02536	0.979822	1.05277	1.03297	1.07304	1.14698	1.06089	1.13315	1.19285	1.14548	1.07283	1.05376	1.03833	0.965908	0.99115	0.969704	1.15153	1.26626	1.27652	1.35984	1.34935	1.4397	1.39965	1.23475	1.283	1.11611	1.00535	1.12212	1.07173	1.03604	1.0871	1.08121	0.992772
1.37218	1.30567	1.29888	1.32336	1.36134	1.34463	1.36662	1.3472	1.39911	1.4633	1.44974	1.39832	1.41016	1.34859	1.37407	1.38789	1.35764	1.34254	1.31768	1.28316	1.18719	1.26267	1.21797	1.25617	1.24884	1.20579	1.2307	1.20591	1.20977	1.22329	1.19976	1.13976	1.18243	1.28948	1.37359	1.43593	1.44698	1.44558	1.45626	1.42456	1.38874	1.4141	1.47156	1.56335	1.51232	1.54863	1.53448	1.44093	1.29842	1.43145
0.521545	0.553768	0.520939	0.529713	0.506468	0.513877	0.524731	0.513413	0.566461	0.585386	0.617499	0.622057	0.63634	0.625341	0.650833	0.632403	0.593062	0.565561	0.431359	0.555066	0.533353	0.483328	0.459178	0.452911	0.425612	0.423044	0.387876	0.395446	0.400699	0.383646	0.428329	0.451622	0.441997	0.516572	0.572492	0.623674	0.71458	0.733931	0.766763	0.850099	0.846522	0.866478	0.891625	0.843402	0.80097	0.8243	0.838419	0.784552	0.774979	0.818606
0.869019	1.06115	1.07294	1.08923	1.18872	1.13153	1.24	1.17864	1.25227	1.38668	1.45151	1.54857	1.70929	1.65904	1.67858	1.63839	1.69135	1.5758	1.41717	1.45227	1.28539	1.22538	1.22464	1.2235	1.20496	1.11359	1.07834	1.05537	1.06485	1.05923	0.985528	0.987727	1.05667	1.18278	1.24714	1.42481	1.40844	1.6742	1.64605	1.60308	1.60636	1.58798	1.67487	1.67881	1.73031	1.47768	1.45426	1.52951	1.49209	1.48423
1.01815	0.991555	1.01494	0.9897	0.941244	0.949158	0.967107	0.984031	0.961994	0.912331	0.954344	0.968081	0.910432	0.864231	0.813741	0.824927	0.834403	0.853763	0.832508	0.865444	0.829935	0.823366	0.844798	0.787316	0.8357	0.843405	0.828405	0.885252	0.858649	0.894677	0.862205	0.919177	0.829269	0.926234	1.04176	1.10669	1.07437	1.23139	1.16631	1.3744	1.23419	1.21163	1.38261	1.4137	1.30042	1.23823	1.30243	1.29923	1.22217	1.20028
0.859123	0.811641	0.835822	0.831102	0.865853	0.810016	0.791834	0.860871	0.802145	0.759937	0.763078	0.800969	0.792301	0.787804	0.818227	0.728445	0.761185	0.866931	0.885404	0.934621	0.925945	0.918817	0.95683	0.961268	0.957781	0.916123	0.959621	0.973232	1.01323	0.97808	0.916518	0.894014	0.91059	1.07913	1.09866	1.21395	1.267	1.41606	1.28864	1.37626	1.35285	1.47147	1.34762	1.43098	1.37155	1.228	1.2344	1.21403	1.1661	1.11766
0.609383	0.578314	0.578047	0.568683	0.550947	0.561326	0.575784	0.610024	0.656543	0.687058	0.718544	0.715227	0.713549	0.714426	0.744025	0.70881	0.714443	0.702409	0.716832	0.696355	0.691297	0.719773	0.739249	0.726543	0.714382	0.693773	0.68698	0.662831	0.676275	0.666511	0.65607	0.633168	0.638104	0.746032	0.821269	0.921391	0.967286	1.03243	1.05282	1.05828	1.07763	1.10414	1.06663	1.14611	1.09122	1.08991	1.0569	1.02935	0.993448	0.999028
1.15917	0.944959	1.00412	1.08047	1.0243	1.17184	1.12326	1.09438	1.01963	1.07759	1.03553	1.12709	1.13938	1.08944	1.12171	1.04669	1.07613	1.06731	1.0627	1.14643	1.08704	1.04901	1.01547	1.08901	1.23023	1.15963	1.18821	1.20006	1.23919	1.2273	1.26607	1.13169	1.07278	1.09224	1.03521	0.974707	0.944194	0.85201	0.80953	0.763727	0.824985	0.808805	0.793764	0.686417	0.707338	0.654134	0.637046	0.686054	0.762024	0.813495
0.872892	0.906145	0.874789	0.901691	0.90651	0.892981	0.917575	0.955007	0.904649	0.921622	0.952134	0.876983	0.884242	0.894837	0.935027	0.892169	0.89459	0.879369	0.918843	0.918074	0.929072	0.912043	0.924857	0.894277	0.891278	0.8853	0.901124	0.899253	0.925163	0.933165	0.972819	0.930243	0.959053	1.10022	1.22131	1.42835	1.3259	1.52567	1.55866	1.62727	1.59369	1.54229	1.70318	1.83254	1.96882	1.75865	1.86933	1.93979	1.86733	1.86534
0.907449	0.880373	0.98582	0.854065	0.948549	0.95844	0.949961	0.699244	0.599844	0.573665	0.608117	0.621116	0.585555	0.549557	0.530105	0.516989	0.492821	0.46658	0.498986	0.548208	0.505904	0.55592	0.555868	0.586805	0.561306	0.551942	0.510977	0.630554	0.706465	0.756945	0.709105	0.677735	0.779458	0.955201	1.02722	1.12819	1.23046	1.34004	1.26512	1.24457	1.15202	1.19695	1.16389	1.01028	1.03209	1.1305	1.2294	1.36238	1.39025	1.40094
0.659678	0.701662	0.673428	0.649695	0.660647	0.61987	0.634551	0.634902	0.645011	0.658453	0.612977	0.622592	0.62759	0.612008	0.635498	0.573204	0.581451	0.593823	0.578941	0.572714	0.607671	0.669303	0.617617	0.555926	0.559053	0.560986	0.5798	0.534497	0.532162	0.498579	0.518237	0.504618	0.494077	0.54155	0.593151	0.609602	0.658057	0.650159	0.725507	0.722732	0.699207	0.775601	0.743701	0.806843	0.871471	0.855296	0.849347	0.807259	0.852704	0.851355
0.585966	0.625086	0.592497	0.581857	0.596429	0.589459	0.573229	0.586513	0.634368	0.586856	0.555293	0.552715	0.61268	0.58208	0.59493	0.592245	0.546024	0.63764	0.678306	0.698445	0.754947	0.700141	0.763682	0.773557	0.780755	0.797715	0.826853	0.861151	0.845403	0.830982	0.846549	0.902909	0.941295	1.09325	1.14468	1.2591	1.37525	1.49583	1.52848	1.63144	1.57284	1.6091	1.69304	1.49935	1.55956	1.52612	1.59863	1.42564	1.36902	1.36658
0.83041	0.853245	0.844483	0.85035	0.828144	0.837531	0.900668	0.880231	0.818351	0.829845	0.838687	0.802595	0.751113	0.878259	1.00311	1.07582	1.06974	1.01654	1.03052	0.993266	0.895688	0.872912	0.874385	0.80066	0.729548	0.723129	0.715956	0.687025	0.621072	0.599554	0.610213	0.597196	0.585232	0.738497	0.878508	0.964257	1.07066	1.24671	1.32839	1.22152	1.19376	1.25066	1.17106	1.15735	1.17425	1.07341	1.05549	1.15824	1.08209	1.15169
2.06422	1.416	1.01314	0.864192	1.02168	1.06856	1.1845	1.56057	1.48535	1.42483	1.55324	1.42659	1.59262	1.48339	1.26856	1.23341	0.958194	1.02519	1.00483	1.03845	1.12608	1.20014	1.20498	1.11186	1.10536	1.10938	1.1349	1.12368	1.04398	1.21117	1.19806	1.10952	1.13132	1.05325	1.4182	1.37657	1.45054	1.42936	1.4436	1.53177	1.73541	1.40996	1.172	1.08318	1.10974	1.10964	1.18897	1.06124	1.09847	1.2879
0.722369	0.684475	0.526198	0.50925	0.462988	0.455757	0.555234	0.436612	0.492687	0.538464	0.560958	0.434853	0.500994	0.458964	0.457166	0.438355	0.554699	0.581592	0.509424	0.533344	0.49974	0.502984	0.592611	0.45563	0.484234	0.524606	0.583917	0.60314	0.574289	0.549917	0.551881	0.565818	0.658775	0.612551	0.654516	0.693061	0.744734	0.694052	0.675612	0.692169	0.770871	0.720173	0.763998	0.78374	0.827877	0.877835	0.903467	0.912694	0.995247	0.981354
0.611607	0.744354	0.714864	0.625415	0.506364	0.605099	0.59534	0.626055	0.643549	0.721529	0.671178	0.646934	0.646465	0.631002	0.632451	0.592562	0.579239	0.542187	0.583136	0.662916	0.631165	0.60522	0.528362	0.529156	0.504257	0.518509	0.485648	0.502804	0.586344	0.56948	0.595432	0.557632	0.600579	0.744447	0.825187	0.969954	0.978219	0.933829	1.04826	1.13623	0.557851	0.430149	0.182223	0.50202	0.129714	0.130686	0.125714	0.120735	0.113588	0.101272
0.760558	0.705968	0.673027	0.691722	0.687965	0.697684	0.69072	0.63714	0.656091	0.646148	0.601508	0.583128	0.584444	0.549692	0.548326	0.559185	0.563645	0.573688	0.553543	0.54515	0.503609	0.506807	0.503673	0.507446	0.484793	0.482588	0.48979	0.504282	0.491043	0.507922	0.519492	0.516389	0.531025	0.585613	0.58267	0.603205	0.617978	0.646906	0.644921	0.64843	0.666188	0.683409	0.677228	0.68036	0.66967	0.687321	0.678927	0.685374	0.728031	0.73887
1.16933	1.1534	1.20399	1.26379	1.30215	1.26548	1.21517	1.20329	1.15805	1.17814	1.21842	1.26928	1.31252	1.40474	1.23809	1.07894	1.04335	0.970237	0.976483	0.91333	0.946446	0.988195	0.963913	0.948906	0.917041	0.910916	0.963854	0.89837	0.912421	0.932643	0.970733	0.974342	0.962262	1.1494	1.17004	1.2299	1.27392	1.46637	1.42117	1.42981	1.5171	1.5236	1.58813	1.43466	1.43521	1.42921	1.51171	1.45938	1.43431	1.55786
0.850542	0.874581	0.890549	0.85391	0.897047	0.914551	0.96707	0.982379	0.949864	0.942851	1.00565	0.952619	1.00754	0.808384	0.837092	0.876146	0.89477	0.895683	0.94878	0.911057	0.991196	0.979588	0.962233	0.949368	0.9474	0.996221	1.0429	0.990649	0.970285	0.981297	0.988886	0.975533	0.992996	1.07453	1.084	1.20508	1.18794	1.26118	1.27292	1.26048	1.2652	1.30282	1.31036	1.36921	1.33266	1.31946	1.42831	1.52207	1.53827	1.58367
0.732603	0.657198	0.660277	0.65674	0.651773	0.598816	0.662206	0.656066	0.747744	0.680634	0.725476	0.734686	0.699904	0.707218	0.652066	0.583482	0.644066	0.676171	0.636371	0.658074	0.712034	0.709809	0.69724	0.698512	0.733858	0.712519	0.707343	0.776038	0.723566	0.704539	0.69805	0.714475	0.837871	0.987557	1.09731	1.17775	1.33282	1.35791	1.57081	1.4034	1.37918	1.38661	1.44919	1.70142	1.5369	1.52282	1.34354	1.64513	1.69486	1.54332
1.68447	1.54359	1.57551	1.64848	1.73118	1.61137	1.72708	1.53766	1.58721	1.53005	1.4566	1.40323	1.44375	1.40375	1.23336	1.25127	1.23612	1.21692	1.2048	1.13404	1.16748	1.11869	1.25325	1.23518	1.21278	1.25882	1.33043	1.21602	1.13532	1.09093	1.11064	1.08015	1.04236	1.10039	1.20556	1.24553	1.29154	1.42516	1.52639	1.71892	1.01796	0.82152	0.718505	0.657277	0.619563	0.764829	0.962119	1.49567	2.04902	1.84445
0.972938	0.952235	0.996058	1.02103	1.02541	1.03272	1.10288	1.09089	1.08368	0.915114	0.87086	0.713103	0.680328	0.813243	0.743382	0.692888	0.643239	0.801012	0.878624	0.83802	0.824148	0.831216	0.84622	0.8482	0.756509	0.764592	0.764497	0.765225	0.832852	0.961199	0.97524	0.862151	0.994927	1.1715	1.3323	1.31426	1.47702	1.43254	1.67052	1.57125	1.57469	1.38047	1.3641	1.24761	1.25127	1.02644	0.998534	0.987904	0.989982	1.09241
0.806133	0.827069	0.859202	0.873644	0.881992	0.838084	0.79248	0.828391	0.843893	0.847372	0.825867	0.783958	0.771115	0.793381	0.857405	0.83615	0.823095	0.825617	0.850841	0.817489	0.84241	0.783223	0.695301	0.631228	0.657444	0.65897	0.669055	0.762878	0.625248	0.616866	0.728321	0.688701	0.689255	0.785755	0.875351	0.900273	0.985943	1.11093	1.21708	1.28117	1.20828	1.2271	1.25353	1.26917	1.27094	1.24391	1.12952	1.07511	1.2323	1.28367
0.947553	0.977687	1.01705	1.00273	1.0073	0.986129	0.866998	1.07076	1.15532	1.32371	0.905319	1.471	1.32795	1.28896	1.3255	0.910549	1.13709	1.18878	1.24055	1.18721	0.803264	0.962087	1.13477	1.12305	1.1464	0.831663	0.839615	0.836773	0.999954	0.943911	1.18671	1.57796	1.14689	1.41342	1.30801	1.36338	1.43184	1.42827	1.59089	1.53454	1.55622	1.53905	1.83944	1.72993	1.58434	1.74833	1.68213	1.77695	1.69555	1.56493
1.95162	1.63791	1.67312	1.51154	1.52879	1.43959	1.32709	1.21983	1.21115	1.0954	0.977396	0.970691	0.937241	0.934011	0.945687	0.881285	0.825972	0.786168	0.822992	0.746439	0.774101	0.770514	0.796598	0.768624	0.747846	0.726326	0.731228	0.725744	0.720537	0.709836	0.695141	0.674066	0.678461	0.757407	0.768263	0.743175	0.788939	0.775818	0.762802	0.721791	0.733741	0.744948	0.718422	0.736306	0.726094	0.728717	0.728007	0.722874	0.737318	0.684941
0.962665	0.956732	0.909556	0.835735	0.811338	0.828908	0.846479	0.864049	0.780827	0.763468	0.779143	0.767751	0.710383	0.697225	0.686351	0.655597	0.715159	0.676958	0.632889	0.654669	0.689849	0.66707	0.691457	0.707237	0.652748	0.728833	0.692631	0.673122	0.695295	0.699459	0.70843	0.70839	0.74482	0.81636	0.875699	0.919524	0.944109	1.04818	1.02429	1.04458	1.06488	1.08518	1.10379	1.1224	1.10129	1.11058	1.15732	1.0404	1.06329	1.09292
0.903627	0.924286	0.919127	0.908212	0.951704	0.911031	0.872549	0.869124	0.960854	0.995641	1.01928	0.988798	0.980739	1.07496	1.03957	1.2327	1.17654	1.1388	1.0377	0.950338	0.930718	0.964774	0.961079	0.959934	0.96151	0.927596	0.949568	0.925561	0.958605	1.00538	1.0259	1.09229	1.18127	1.3496	1.41027	1.47634	1.44906	1.54241	1.52768	1.54151	1.41883	1.35352	1.48096	1.46824	1.48703	1.49403	1.52321	1.76684	1.80898	1.74543
1.91864	1.66815	1.80338	1.66998	1.56074	1.40796	1.37347	1.23403	1.32408	1.33305	1.23401	1.19251	1.16758	1.17086	1.10425	1.07698	1.01583	0.979279	1.08955	1.04511	1.03522	1.066	1.02023	0.99923	1.03703	1.04745	1.04103	1.01547	0.951047	0.901334	0.978702	0.910025	0.963518	1.10101	1.12605	1.28883	1.35037	1.42202	1.56031	1.53243	1.52902	1.45753	1.37361	1.4945	1.57915	1.67133	1.61955	1.72293	1.75525	1.6084
0.848145	0.840129	0.804074	0.799021	0.797083	0.844733	0.870549	0.938753	0.874384	1.0851	1.10303	1.03354	1.12478	1.11276	1.38559	1.43326	1.31825	1.07956	0.956221	1.02277	0.987612	0.919746	0.85868	0.944798	0.963206	0.923808	0.789807	0.805354	0.811074	0.7711	0.739114	0.710156	0.702391	0.753099	0.816796	0.862004	0.806598	0.797202	0.76205	0.737253	0.637858	0.696068	0.787183	0.99731	1.08756	1.10433	1.12692	1.04754	1.03831	0.963945
1.7744	1.48591	1.5691	1.56298	1.59973	1.48679	1.63335	1.61285	1.4944	1.52992	1.88046	1.78848	1.70689	1.62682	1.43883	1.4123	1.41887	1.38587	1.40227	1.22228	1.3624	1.28099	1.32819	1.37406	1.32879	1.38171	1.36086	1.23712	1.19205	1.28718	1.30928	1.32364	1.33554	1.50234	1.48119	1.41606	1.44242	1.42706	1.51601	1.41884	1.59542	1.34865	1.46992	1.20782	1.12156	1.11062	1.12669	1.13615	1.18899	1.19672
0.699651	0.761513	0.850159	0.835085	0.850773	0.811114	0.765396	0.709133	0.731664	0.74701	0.793609	0.818894	0.871994	0.967496	0.916747	0.928043	0.909311	0.777907	0.962081	0.866644	0.784964	0.800346	0.808898	0.844255	0.702115	0.659756	0.811264	0.648084	0.874768	0.689654	0.678358	0.715842	0.870231	0.841436	0.973764	1.01832	1.12606	1.17198	1.12924	1.20957	1.27276	1.30953	1.26929	1.33828	1.43754	1.47964	1.48025	1.49781	1.48714	1.51398
1.71785	1.48849	1.54813	1.65099	1.68336	1.66216	1.58485	1.56376	1.64579	1.50462	1.53936	1.68499	1.65115	1.67607	1.63804	1.77067	1.7497	1.6906	1.77991	1.69088	1.74684	1.67598	1.7389	1.81216	1.84592	1.84248	1.82445	1.72247	1.71738	1.76782	1.61152	1.56369	1.66374	1.79724	2.02706	2.17602	2.25672	2.47336	2.39607	2.30657	2.29932	2.67429	2.85153	2.91199	2.30506	2.28945	2.32204	2.45265	2.09235	2.30033
0.737764	0.737967	0.730907	0.72106	0.75062	0.739335	0.723302	0.697204	0.726563	0.712221	0.707025	0.723932	0.720991	0.739202	0.713037	0.701559	0.71218	0.704412	0.699988	0.683806	0.67589	0.684469	0.646964	0.674438	0.656906	0.648387	0.67663	0.676203	0.665364	0.667474	0.665902	0.673077	0.663235	0.76077	0.786128	0.842301	0.860518	0.891722	0.898449	0.949439	0.996897	1.02384	1.08112	1.09018	1.10803	1.12673	1.11484	1.08445	1.13555	1.10922
0.884479	0.945514	0.959882	1.0833	1.1159	0.977327	1.02329	0.974633	0.869911	0.779658	0.762616	0.789977	0.73571	0.765784	0.787186	0.795642	0.790098	0.779883	0.698596	0.875348	0.903874	1.13887	1.26322	1.18065	1.29098	1.21021	1.08791	1.09049	1.16324	1.18304	1.27234	1.27161	0.977748	1.09701	0.690361	0.69344	0.711372	0.581526	0.844956	0.746338	0.959776	1.34661	1.40715	1.39789	1.13172	0.865544	1.23615	1.27207	1.27351	0.850343
1.21972	1.14958	1.17366	1.22033	1.25412	1.14497	1.15223	1.22057	1.15243	1.22382	1.25089	1.28712	1.29962	1.24758	1.24814	1.20949	1.17271	1.21082	1.18676	1.24437	1.19036	1.09954	1.19196	1.18591	1.17795	1.13706	1.24129	1.23967	1.21079	1.20444	1.27565	1.28826	1.36866	1.51561	1.57438	1.72913	1.80562	1.83063	1.72733	1.7831	2.02392	2.10955	2.15838	2.07199	1.96242	1.81511	1.78476	1.70266	1.6255	1.63674
0.415344	0.373785	0.351775	0.385289	0.33532	0.348253	0.339549	0.392752	0.366337	0.32738	0.343249	0.287976	0.351682	0.29846	0.281016	0.371524	0.267846	0.462401	0.434473	0.441983	0.505285	0.510992	0.565701	0.467589	0.498825	0.534529	0.553776	0.535912	0.514464	0.484484	0.421704	0.409885	0.467713	0.584643	0.59444	0.67363	0.592109	0.605889	0.653654	0.727712	0.868033	0.682537	0.646739	0.792939	0.78689	0.858325	0.92976	1.42679	1.92382	1.13046
1.03036	0.978383	1.00113	0.968368	0.944618	0.961904	0.967436	0.91379	0.948318	0.97639	0.973923	0.962416	0.948845	0.928026	0.91355	0.851289	0.914531	0.888369	0.881566	0.802119	0.87709	0.882047	0.870279	0.896364	1.11727	1.13652	1.14598	1.07166	1.10745	1.07684	1.05848	1.01771	0.984523	1.1372	1.24793	1.24764	1.31327	1.47856	1.57814	1.5793	1.48511	1.694	1.72871	1.82194	1.85593	1.73799	1.85524	1.71827	1.95687	1.84929
0.738084	0.74529	0.726373	0.731345	0.730963	0.767738	0.719807	0.71702	0.722211	0.726191	0.67782	0.699309	0.68103	0.671625	0.691622	0.707582	0.67872	0.655379	0.663888	0.666605	0.669211	0.64839	0.675051	0.69805	0.685063	0.688185	0.709788	0.704191	0.729957	0.706831	0.704249	0.697962	0.732057	0.8714	0.999313	1.05997	1.16187	1.13816	1.14167	1.10442	1.17238	1.17359	1.14706	1.20748	1.19914	1.17546	1.19349	1.13288	1.13194	1.12806
0.585096	0.82073	0.845392	0.843266	0.844207	0.838947	0.859696	0.736621	0.959695	1.00647	0.952616	0.919228	0.851709	0.871905	0.831973	0.92772	0.92103	0.852878	0.786193	0.563615	0.658024	0.385288	0.415203	0.639133	0.652665	0.636507	0.760079	0.85464	0.822147	0.890388	0.99799	0.974434	0.800897	0.802852	0.871785	0.888871	1.00873	0.865354	0.865006	0.875228	0.849385	0.788105	0.815407	0.81334	0.710093	0.7613	0.950742	1.2248	1.22539	1.35747
0.981445	0.942547	0.988019	1.13375	0.956326	1.04517	1.16622	0.912423	1.09607	1.03666	0.921642	0.946834	1.00269	1.12195	0.959204	1.11725	1.11582	1.0486	1.0836	1.10011	1.10953	1.08216	1.09828	1.11102	1.03961	1.01245	1.00082	0.936773	0.883793	0.90108	0.977587	0.947651	0.873512	0.93133	0.946239	0.990976	1.00679	0.986754	1.02811	0.966183	0.972395	0.891581	1.11688	1.07021	1.22859	1.36219	1.24138	1.2656	1.3519	1.3527
0.594534	0.628641	0.629863	0.630908	0.623069	0.620383	0.623469	0.606989	0.613774	0.584988	0.559608	0.588422	0.584779	0.592104	0.555426	0.60278	0.572529	0.557184	0.547501	0.525456	0.525435	0.579224	0.531835	0.541033	0.583734	0.591718	0.594425	0.629345	0.620558	0.595756	0.588319	0.640804	0.641254	0.803775	1.01644	1.09634	1.23034	1.24663	1.39059	1.43144	1.4563	1.52099	1.44517	1.50427	1.53668	1.60545	1.54965	1.58788	1.59314	1.64107
1.28338	1.21381	1.10275	1.17402	1.15199	1.08572	1.02448	0.976013	0.88968	0.861241	0.877186	0.835503	0.759771	0.779688	0.797357	0.710499	0.679521	0.657534	0.665022	0.691171	0.617076	0.597094	0.625474	0.587119	0.632138	0.622763	0.67187	0.646826	0.689018	0.687397	0.697997	0.65524	0.690015	0.841662	0.880021	0.971095	0.94235	1.03651	1.08249	1.0821	1.12193	1.1972	1.07266	1.15944	1.23035	1.32065	1.36171	1.24446	1.37019	1.46135
1.22613	1.18574	1.10712	1.15252	1.15276	1.13062	1.20301	1.2632	1.24553	1.42979	1.4905	1.14069	1.09857	1.06969	1.00386	0.886405	0.787232	0.766698	0.787084	0.770053	0.773046	0.740092	0.720322	0.689264	0.758485	0.768977	0.795033	0.784878	0.767664	0.756658	0.754796	0.742541	0.82202	0.933845	1.05613	1.16289	1.3005	1.31827	1.3973	1.36313	1.38399	1.59474	1.55844	1.56127	1.57789	1.68261	1.60894	1.68986	1.5847	1.52478
0.806207	0.793066	0.742487	0.670733	0.661701	0.688846	0.706418	0.703705	0.727382	0.69364	0.705669	0.647058	0.534242	0.552462	0.536036	0.505673	0.497699	0.511928	0.437023	0.519236	0.529029	0.525738	0.493349	0.513206	0.488925	0.482953	0.530448	0.567639	0.526998	0.512522	0.479221	0.477288	0.489248	0.605565	0.665344	0.768297	0.830727	0.837519	0.959926	1.02371	0.985013	1.09112	1.00001	1.08492	1.21084	0.974538	1.12322	1.08368	1.0317	1.05764
1.16094	1.1875	1.22875	1.03367	1.0882	1.08327	1.08395	1.09279	1.2095	1.20467	1.17287	1.13382	1.13548	1.14776	1.19529	1.227	1.26173	1.21621	1.14741	1.1533	1.16429	1.09858	1.15254	1.12598	1.19584	1.19732	1.21681	1.16127	1.28166	1.20241	1.17999	1.17345	1.2925	1.50223	1.44056	1.49143	1.55158	1.50596	1.59202	1.48436	1.2948	1.50318	1.94856	1.52954	1.39523	1.59302	1.51335	1.63573	1.75741	2.06325
0.78663	0.809957	0.817783	0.83338	0.761822	0.780511	0.815726	0.818605	0.777061	0.851349	0.803816	0.840709	0.917596	0.893883	0.872824	0.871565	0.839309	0.794929	0.837322	0.808757	0.825	0.879396	0.790875	0.807258	0.765619	0.799442	0.792547	0.826296	0.777175	0.801407	0.789088	0.793948	0.840588	1.05422	1.20246	1.39327	1.54733	1.65877	1.49754	1.58232	1.50722	1.7012	1.6792	1.57023	1.63248	1.73662	1.687	1.65851	1.69958	1.71419
1.44434	1.18728	1.2453	1.33711	1.37904	1.38224	1.57898	1.53546	1.59154	1.40503	1.21338	1.24498	1.45433	1.22274	1.2337	1.27725	1.40352	1.22864	1.18452	1.12324	1.1417	1.14955	1.20011	1.17833	1.0755	1.07537	1.1654	1.22266	1.15999	1.16074	1.19105	1.09646	0.975103	1.0428	1.12194	1.35115	1.61992	1.82477	1.41729	1.55775	1.78876	1.98302	1.47496	1.47062	1.51588	1.65693	1.20599	1.0795	1.46181	2.93638
0.598583	0.621973	0.64053	0.640286	0.632943	0.620397	0.662799	0.632047	0.631848	0.596159	0.608377	0.58601	0.594235	0.602505	0.574537	0.54966	0.591285	0.68592	0.937808	0.642917	0.387339	0.381827	0.419621	0.419506	0.812649	0.645222	0.709599	0.552792	0.534373	0.709051	0.69456	0.702056	0.668756	0.73883	0.798185	0.837881	0.802191	0.907777	0.960981	0.931997	0.891979	0.972349	1.08692	1.09495	1.09349	1.12558	1.04009	1.09094	1.10107	1.15826
0.697016	0.676335	0.706256	0.782199	0.741901	0.749022	0.704543	0.678459	0.738273	0.701558	0.766281	0.746721	0.752236	0.65426	0.639476	0.603561	0.632982	0.595623	0.626227	0.626097	0.617022	0.656739	0.659366	0.669408	0.636014	0.647633	0.622162	0.637962	0.600196	0.623612	0.623625	0.646564	0.669274	0.804888	0.869084	0.976166	1.16656	1.22789	1.29599	1.4203	1.29783	1.32622	1.40509	1.51876	1.73969	0.447362	0.311402	0.321864	0.311207	0.286898
0.949135	0.901152	0.883838	0.86418	0.842827	0.86448	0.863078	0.843853	0.822565	0.818729	0.829638	0.82702	0.84139	0.774401	0.792016	0.733187	0.724749	0.741632	0.765525	0.718883	0.730208	0.713988	0.713012	0.706862	0.695986	0.65959	0.680077	0.714153	0.711312	0.684923	0.676706	0.668924	0.778065	1.04447	0.992704	1.08005	1.15583	1.22129	1.28245	1.34987	1.20438	1.12465	1.23645	1.21688	1.27215	1.38201	1.54211	1.53539	1.60721	1.69363
0.839078	0.788948	0.874295	0.899305	0.983915	0.968531	0.94864	0.937483	0.981171	0.887336	0.837576	0.78981	0.690197	0.72453	0.815395	0.724779	0.676634	0.64599	0.644032	0.623156	0.670309	0.671097	0.677004	0.694721	0.787007	0.746435	0.71772	0.707253	0.700372	0.705788	0.731163	0.737019	0.786633	0.950233	1.03509	1.22436	1.36011	1.40391	1.37715	1.46022	1.49128	1.44446	1.35513	1.41083	1.24013	1.16534	1.00052	0.873653	0.917551	1.095
0.731766	0.746265	0.800882	0.930813	0.855207	0.964579	0.99303	1.05134	1.02243	0.946122	1.01879	0.989228	1.06818	0.99577	1.03775	1.11525	1.10526	1.08562	1.09154	1.03456	1.06448	1.05995	1.05866	1.11593	1.09265	1.10258	1.07456	1.07639	1.22273	1.18664	1.09048	1.00536	1.02109	1.29921	1.37328	1.43262	1.51223	1.58785	1.81752	1.70286	1.61675	1.77719	1.65552	1.82271	1.83868	2.01942	1.94072	1.85195	1.97813	1.92174
1.08805	1.07379	1.0444	1.06314	1.03415	1.0371	1.04999	1.08711	1.01345	1.01415	0.97665	0.970357	0.969452	0.967981	0.977279	0.94593	0.957403	0.910579	0.89986	0.859278	0.864835	0.884066	0.859036	0.932293	0.94308	0.897743	0.906225	0.874244	0.895282	0.930019	0.897094	0.871794	0.93837	0.847697	1.05342	1.07518	1.09237	1.19453	1.30378	1.40053	1.51045	1.54654	1.60123	1.77043	1.83967	1.70234	1.59364	1.7448	1.85311	2.03822
1.00294	1.0196	1.02322	0.920243	0.92994	0.887735	0.927192	0.900989	0.956078	0.92845	0.937508	0.91454	0.960862	0.896435	0.945365	0.875148	0.928466	0.932082	0.924489	0.933435	0.845883	0.843074	0.879173	0.888288	0.931122	0.885874	0.90054	0.925111	0.961814	0.973244	0.928215	0.972638	0.918893	1.01861	1.15913	1.16433	1.04616	1.15323	1.09766	1.03815	1.01817	1.00976	1.04512	0.984297	1.019	1.01837	1.03005	1.01095	0.984022	1.04877
1.11806	1.08493	1.05714	1.01915	1.00024	0.983362	1.00182	0.983602	1.017	0.98288	0.972371	1.05831	0.970819	1.10917	1.19928	1.34159	1.31424	1.31366	1.24481	1.13952	1.06052	0.992594	0.971148	0.949406	0.905362	0.900245	0.871771	0.890645	0.838656	0.79003	0.81171	0.817199	0.916396	1.09397	1.14143	1.19279	1.28972	1.23981	1.26627	1.17457	1.12284	1.07734	0.961277	0.992587	1.03918	0.943325	0.959518	1.05219	0.966477	1.11471
1.23432	1.24278	1.30935	1.19014	1.17824	1.2049	1.33816	1.12985	1.10224	1.16849	1.14263	1.14097	1.08761	1.09745	1.05011	1.0938	1.10297	1.03167	1.11158	1.07447	1.06528	1.07383	1.02631	0.989842	0.985084	0.928156	0.981269	0.929299	0.970385	0.962187	1.04814	0.942057	0.955026	1.23238	1.38894	1.62691	1.70452	1.85728	1.88953	1.80452	1.80546	1.94626	1.81306	1.80771	1.74633	1.76177	1.85489	1.8436	1.73855	1.76217
1.23419	1.23505	1.23442	1.26038	1.23356	1.27633	1.25189	1.23475	1.21753	1.25635	1.24781	1.2698	1.10981	1.17861	1.15925	1.23671	1.16418	1.33461	1.46806	1.38266	1.37267	1.38622	1.38522	1.3972	1.45181	1.41521	1.46698	1.37717	1.36008	1.42122	1.36661	1.22525	1.1405	1.26031	1.40492	1.48875	1.642	1.88059	1.96858	2.16124	2.1431	2.07726	2.20975	2.0992	2.31471	2.74726	2.70308	2.70433	2.71426	2.62609
0.835636	0.725609	0.807462	0.855016	0.833929	0.909071	0.885723	0.960789	0.955183	0.953359	1.0203	0.986386	0.976299	1.00941	1.16316	0.918269	0.971981	1.10348	1.17122	1.165	0.95921	0.981482	0.914685	0.901571	0.954361	0.970418	0.981619	0.909479	0.880229	0.820645	0.895093	0.903791	0.945201	0.98479	1.12656	1.00829	1.00299	1.03499	1.10828	1.26722	1.12506	1.16799	1.19268	1.37577	1.32383	1.18759	1.21027	1.24397	1.3281	1.32103
0.84957	0.801205	0.880958	0.885801	0.85273	0.898268	0.885654	0.876564	0.883795	0.874457	0.875574	0.876495	0.860918	0.884754	0.851237	0.812862	0.796694	0.77671	0.797262	0.792384	0.763558	0.745592	0.721745	0.745055	0.721859	0.732204	0.748	0.750642	0.747328	0.750152	0.719138	0.742845	0.765208	0.927518	1.01735	1.0448	1.13531	1.20729	1.18451	1.24712	1.26903	1.29585	1.23562	1.28603	1.3068	1.32081	1.27927	1.29616	1.19288	1.18635
0.988155	0.989473	0.960262	0.93776	0.938118	0.924678	0.934355	0.949741	0.919081	0.915929	0.925632	0.92998	0.927938	0.930185	0.963632	0.970488	0.955647	0.964022	0.956857	0.962512	0.95768	0.94914	0.940851	0.961715	0.968089	0.949	0.919794	0.875014	0.939269	0.94573	0.909318	0.925894	0.986093	1.292	1.54802	1.73621	1.83961	1.90948	1.97959	1.85949	1.83168	1.85715	1.77435	1.78145	1.8538	1.84438	1.78171	1.75295	1.74036	1.72662
0.698665	0.701104	0.663941	0.66028	0.67216	0.722587	0.748574	0.722561	0.799687	0.813843	0.88009	0.939391	0.956229	0.93474	0.96707	0.983927	0.909196	0.978062	0.994938	1.02177	1.05155	1.1096	1.11377	1.13096	1.14086	1.16829	1.2344	1.28179	1.00352	1.00475	1.10172	1.08965	1.45441	1.5086	1.1849	1.04634	1.01131	1.07415	1.01424	1.00588	1.09258	1.06748	1.05038	0.966943	1.04157	0.94476	0.959271	1.04112	1.04257	1.16057
0.762803	0.691205	0.748669	0.720787	0.692142	0.658518	0.702063	0.703116	0.696674	0.717189	0.724631	0.716284	0.679326	0.787428	0.739426	0.7842	0.79044	0.801006	0.738912	0.734955	0.73599	0.780491	0.717396	0.770907	0.772471	0.77259	0.755537	0.750759	0.695534	0.694815	0.713971	0.667669	0.678911	0.695818	0.74618	0.787575	0.778428	0.728888	0.723958	0.712906	0.671636	0.67149	0.703667	0.706539	0.909408	0.993003	0.926876	0.994448	0.862308	0.967074
1.48366	1.5851	1.68981	1.68489	1.90014	1.79559	1.72734	1.57027	1.53415	1.4537	1.4264	1.43862	1.42741	1.36347	1.34492	1.36896	1.34484	1.32954	1.24858	1.2438	1.2518	1.28196	1.15522	1.15702	1.21648	1.16716	1.24234	1.29891	1.29769	1.396	1.46965	1.50552	1.4217	1.52235	1.80779	1.91373	1.90097	2.11037	1.98798	1.89191	1.96221	2.06658	1.93042	1.86251	1.85248	2.0228	1.8033	1.74465	1.87272	1.74008
0.926763	0.9117	0.836323	0.861832	0.898025	0.845008	0.84404	0.808742	0.787934	0.831867	0.807164	0.8155	0.755675	0.742528	0.754904	0.729843	0.680417	0.715947	0.693304	0.693305	0.683244	0.676147	0.6714	0.650587	0.645678	0.632728	0.641385	0.653625	0.633189	0.664293	0.650074	0.66037	0.743286	0.99	1.10854	1.24184	1.43962	1.47648	1.50442	1.55189	1.5577	1.53777	1.44035	1.42894	1.52051	1.44969	1.50164	1.4988	1.54639	1.5751
0.846022	0.919746	1.01476	0.852212	0.924784	0.808894	0.931164	0.961672	0.996282	1.09053	1.06059	1.03322	1.01291	0.859682	0.865569	0.971713	1.00897	1.02278	0.92413	1.00828	1.10148	1.05093	1.0411	1.01051	1.06957	1.02191	0.971317	0.831092	0.858193	0.836404	0.888127	0.817183	0.866698	0.636944	0.696952	0.726845	0.749181	0.761548	0.786757	0.858305	0.883938	0.923903	0.968435	1.03267	0.997671	1.14066	1.10474	1.00996	0.853633	0.946693
0.621523	0.612453	0.605543	0.620472	0.600848	0.593245	0.609123	0.661479	0.51883	0.486245	0.49205	0.533481	0.499961	0.485576	0.475959	0.44906	0.462057	0.451178	0.474357	0.470367	0.466452	0.455305	0.480875	0.467696	0.483256	0.519363	0.559977	0.526188	0.540846	0.514996	0.541321	0.540295	0.613076	0.672057	0.651695	0.606713	0.625873	0.540289	0.559206	0.58912	0.584093	0.563761	0.6712	0.706797	0.708684	0.704896	0.730962	0.730213	0.728431	0.726645
1.18446	1.09235	1.14458	1.15447	1.10582	1.10587	1.15515	1.10691	1.16858	1.21691	1.18512	1.15511	1.17831	1.13153	1.02731	0.995887	0.990614	0.945942	0.968306	0.959135	1.01464	1.03837	1.02338	1.00863	1.00421	0.983303	0.955986	0.931143	0.944714	0.907952	0.978998	0.977971	0.945645	1.0489	1.0519	1.05524	1.06317	1.08748	1.06626	1.0494	1.04989	1.06055	1.01133	1.12966	1.06986	1.30596	1.14298	0.846832	0.770522	0.818531
0.755931	0.749943	0.752277	0.716915	0.696133	0.674464	0.659819	0.639492	0.642337	0.608615	0.61861	0.618351	0.59977	0.638783	0.586988	0.55039	0.555026	0.582359	0.58152	0.629585	0.657155	0.559671	0.551362	0.561146	0.540409	0.530727	0.538205	0.503071	0.494279	0.486871	0.502919	0.482116	0.513262	0.681821	0.773502	0.908	1.01543	1.14218	1.19853	1.24067	1.27392	1.19943	1.20783	1.26926	1.22774	1.21885	1.18363	1.16867	1.18529	1.19286
0.871891	0.924013	1.00434	1.08796	1.16902	1.11446	1.17504	1.1166	1.03936	1.04787	1.04435	1.09396	1.1368	1.09258	1.10066	1.05725	1.11966	0.96985	1.12441	1.21058	1.10946	1.06499	1.00209	1.02852	1.03395	1.08081	1.07075	1.02389	1.07974	1.09158	1.04651	0.954635	1.00437	1.12829	1.17502	1.1889	1.34031	1.27732	1.40536	1.48649	1.40054	1.42635	1.47853	1.46848	1.33891	1.30155	1.33329	1.31704	1.30203	1.33994
0.797471	0.839382	0.87931	0.866613	0.86016	0.818705	0.866023	0.844693	0.815605	0.853794	0.815273	0.819325	0.783415	0.755186	0.758871	0.754689	0.687116	0.672635	0.674653	0.697181	0.716483	0.667482	0.63964	0.641572	0.636671	0.681005	0.673027	0.628693	0.655234	0.653626	0.615761	0.635485	0.734535	0.869354	0.992985	1.11265	1.13487	1.3639	1.46459	1.41975	1.43252	1.28983	1.26435	1.31957	1.3537	1.34193	1.29617	1.21313	1.29352	1.22846
1.16282	1.10562	1.10885	1.1625	1.11076	1.11563	1.07713	1.0894	1.02021	1.00975	0.984223	0.931504	1.01582	1.05775	1.02046	0.972039	0.95687	0.912847	0.924391	0.887067	0.891615	0.910593	0.880324	0.841417	0.914114	0.88974	0.906801	0.87445	0.894917	0.884386	0.952927	0.902048	0.978939	1.19916	1.31613	1.39878	1.45988	1.46494	1.36006	1.35972	1.40508	1.51097	1.50664	1.42597	1.35999	1.38354	1.34127	1.40433	1.27392	1.29654
1.17043	1.10729	1.04749	1.06931	1.02011	1.10328	0.996011	1.0406	1.04355	1.03895	1.0179	0.913839	0.791406	0.80021	0.829248	0.868847	0.876599	0.988623	1.18506	1.10521	0.948755	1.03665	0.934042	1.01347	0.765476	0.901949	0.83345	0.790183	0.938126	1.01707	0.894475	0.905211	0.906783	0.905533	0.939284	1.04431	1.11345	1.17442	1.22847	1.15294	1.15914	1.1244	1.18913	1.17569	1.16849	0.975275	1.07764	1.09025	1.01745	1.10957
1.14752	1.00185	0.94445	0.918794	0.916559	0.904888	0.89648	0.773199	0.796145	0.834839	0.73551	0.845619	0.904213	0.878258	0.873378	0.849552	0.738968	0.802187	0.810939	0.787906	0.776116	0.788693	0.991494	0.990812	1.0418	1.02986	1.08266	1.09545	1.1354	1.13195	1.11465	1.07048	1.16214	1.23224	1.30927	1.35345	1.43167	1.33463	1.34026	1.28824	1.27901	1.22561	1.33365	1.32643	1.48436	1.25816	1.21635	1.31522	1.24662	1.24294
0.787237	0.80079	0.750334	0.849265	0.859019	0.77199	0.842676	0.796373	0.798047	0.789836	0.698754	0.749443	0.784877	0.732581	0.723007	0.709649	0.69575	0.709736	0.668418	0.65763	0.701254	0.743553	0.741137	0.714001	0.70468	0.732308	0.743152	0.742147	0.685941	0.732312	0.699007	0.648003	0.660143	0.752866	0.945969	1.17006	1.18608	1.0969	1.14007	1.15909	1.1794	1.26271	1.2362	1.28336	1.32974	1.31122	1.21793	1.30539	1.27507	1.21732
1.04482	1.13443	1.23724	1.11836	1.33824	1.28826	1.1452	1.24383	1.17349	1.2377	1.28244	1.24946	1.21647	1.18349	1.1647	1.24824	1.17847	1.25644	1.16977	1.06952	1.20655	1.16055	1.13974	1.23698	1.36939	1.28288	1.24082	1.22343	1.37421	1.35836	1.29122	1.20129	1.3222	1.56778	1.63295	1.61716	1.8665	1.93846	1.78478	1.78748	1.83944	1.97667	1.97169	1.99526	1.86468	1.98225	1.74439	1.8945	1.86583	1.66008
1.39679	1.42004	1.42872	1.33956	1.31396	1.28754	1.37717	1.31972	1.37329	1.36505	1.32304	1.3325	1.23917	1.18426	1.14616	1.10617	1.04866	1.17336	1.1074	1.1163	1.13814	1.19334	1.18792	1.24235	1.26404	1.20381	1.17296	1.20708	1.14333	1.13608	1.1827	1.18921	1.23245	1.32742	1.40233	1.45512	1.57133	1.64374	1.71273	1.66469	1.68173	1.79616	1.80453	1.78956	1.59927	1.60003	1.55923	1.61571	1.97636	2.05003
1.03392	1.05222	1.0173	1.10665	1.08234	1.10899	1.07467	1.03113	1.02812	0.907985	0.856532	0.865225	0.837762	0.89365	0.916326	0.773038	0.839697	0.781265	0.743051	0.802463	0.795355	0.943213	0.851539	0.848867	0.958157	0.909864	0.905261	0.892608	0.892575	0.887217	0.929054	0.916593	0.937651	1.15941	1.16711	1.2408	1.35489	1.51648	1.5404	1.52246	1.52676	1.48509	1.54859	1.50176	1.50945	1.59846	1.53513	1.68236	1.66735	1.80176
2.31361	2.31936	2.05893	1.81364	1.76977	1.68753	1.64184	1.57466	1.61083	1.95174	1.65357	1.94693	1.98569	2.05017	1.9132	1.71698	1.69814	1.84829	1.6855	1.68222	1.57196	1.40489	1.72641	1.24596	1.13972	1.07332	1.12305	1.08773	1.19611	1.25068	1.24447	1.08893	1.16438	1.18148	1.12384	1.18071	1.09726	1.13791	1.08784	1.16103	1.33365	1.23784	1.74258	1.47938	1.26454	1.30087	1.27182	1.38041	1.36005	1.48265
1.30363	1.15914	1.27251	1.28117	1.31523	1.24386	1.28682	1.26749	1.18664	1.11192	1.10741	1.10915	1.12693	1.21105	1.16086	1.2115	1.07857	1.02406	0.98487	1.00421	0.981473	1.01602	1.06066	1.07757	1.07773	1.07784	1.09215	1.00897	0.97943	1.01257	0.986867	0.961812	0.986518	1.05525	1.10028	1.16305	1.22836	1.24563	1.16393	1.17332	1.21366	1.27099	1.3454	1.42726	1.47744	1.33218	1.48073	1.5451	1.69225	1.55214
1.12106	1.08686	1.0451	0.978548	0.991129	0.959868	0.971679	0.960635	0.887917	0.97912	0.941132	1.01639	0.964624	0.90725	0.95834	0.959968	1.01288	0.984076	0.968162	0.907901	0.898073	0.86074	0.925866	0.920962	0.934957	0.935042	0.973975	0.996135	1.00497	1.02861	1.03495	1.02789	1.13276	1.19775	1.27276	1.36429	1.43738	1.33069	1.20232	1.20584	1.25098	1.17987	1.214	1.17884	1.17868	1.21925	1.3199	1.32209	1.36254	1.37829
0.910483	0.889357	0.849079	0.83835	0.854556	0.889924	0.882435	0.884793	0.843211	0.813191	0.915586	0.879618	0.999224	0.971092	0.925593	0.943549	0.87092	0.917044	0.854149	0.848366	0.828947	0.842282	0.889337	0.959473	0.979004	0.963906	0.922883	0.898182	0.770415	0.714304	0.743731	0.678658	0.746398	0.895726	0.904131	1.07685	0.905152	0.855253	0.874368	0.857972	0.931469	0.979429	0.864564	0.754217	0.644492	0.582728	0.608878	0.644337	0.664974	0.704311
0.740469	0.730264	0.676699	0.651277	0.644732	0.660363	0.691196	0.831891	0.814303	0.76117	0.757953	0.73077	0.767882	0.759919	0.798901	0.760539	0.730203	0.724771	0.727634	0.711118	0.717783	0.752822	0.715495	0.726432	0.736886	0.743604	0.749336	0.762414	0.806922	0.811814	0.805122	0.799516	0.832939	0.959744	1.0031	1.11716	1.19748	1.22614	1.30094	1.26977	1.38323	1.39555	1.18678	1.16695	1.22236	1.15738	1.14158	1.07735	1.12055	1.10344
0.964728	1.07579	0.916934	0.884699	0.817454	0.749586	0.772541	0.739084	0.705628	0.664057	0.622486	0.608412	0.637047	0.610215	0.595103	0.604253	0.605575	0.627341	0.629374	0.645341	0.599797	0.605712	0.593609	0.64522	0.60966	0.652139	0.637076	0.607628	0.643092	0.644582	0.661857	0.655695	0.698581	0.837855	0.910697	1.03324	1.0724	1.09378	1.18117	1.30412	1.471	1.44237	1.41375	1.39548	1.27445	1.41357	1.17462	1.21379	1.22914	1.23801
0.611784	0.68215	0.633446	0.647723	0.619968	0.634565	0.606852	0.608505	0.614404	0.623991	0.644851	0.591642	0.634605	0.673542	0.657214	0.604493	0.625488	0.661668	0.672138	0.614631	0.644013	0.640241	0.640758	0.625984	0.691182	0.721095	0.718741	0.707071	0.681934	0.685136	0.780855	0.726853	0.678022	0.7488	0.798948	0.751049	0.801543	0.735458	0.832614	0.825169	0.805913	0.608237	0.876998	0.679357	0.655601	0.637414	0.561055	0.622724	0.625504	0.669501
0.7559	0.666734	0.675127	0.727504	0.679954	0.784857	0.808694	0.811558	0.843821	0.863247	0.85772	0.772792	0.824012	0.801543	0.817756	0.835478	0.850703	0.792277	0.717752	0.810381	0.836771	0.785999	0.81271	0.83093	0.760908	0.797202	0.809517	0.785603	0.754308	0.727166	0.68036	0.70527	0.726539	0.911487	1.00778	1.06137	1.08508	0.981461	0.923159	0.933951	0.944119	0.866809	0.844038	0.809384	0.8157	0.830701	0.780746	0.818449	0.764348	0.741714
1.64044	1.49212	1.53855	1.54535	1.59276	1.50074	1.50009	1.41346	1.426	1.56588	1.59247	1.50364	1.56714	1.50345	1.41603	1.46061	1.31879	1.34483	1.34763	1.19459	1.23901	1.20146	1.23188	1.22833	1.26698	1.23044	1.3301	1.31494	1.35463	1.35204	1.36646	1.29793	1.28078	1.55741	1.82043	1.94962	1.79047	1.86859	1.91813	1.94794	1.82824	1.85065	1.97526	2.28252	2.18722	2.22847	2.22566	2.46861	2.42161	2.45741
1.11833	1.17832	1.19528	1.12938	1.04765	0.979102	0.985727	1.00796	1.00436	0.97131	0.92534	0.877462	0.899818	0.916502	0.877368	0.697049	0.633255	0.602613	0.969851	0.833805	0.765754	0.802521	0.843256	0.961257	0.979296	1.004	0.935658	0.971501	0.95074	0.949408	0.964646	0.926939	0.929118	1.01506	1.0739	1.20253	1.25085	1.30568	1.38936	1.50729	1.6203	1.59764	1.63764	1.54656	1.49103	1.50025	1.525	1.37891	1.37217	1.44637
1.17025	1.09844	1.10084	1.13809	1.39401	1.24195	1.26035	1.24327	1.14239	1.19784	1.18234	1.2216	1.19812	1.20673	1.22786	1.15425	1.10208	1.17944	1.19015	1.19165	1.09836	1.04774	1.03722	1.01125	1.01225	0.894352	0.925053	0.920561	0.886612	0.900138	0.847181	0.881459	0.90947	1.10595	1.20036	1.36572	1.40116	1.53399	1.47522	1.52629	1.58297	1.67681	1.48904	1.54344	1.59834	1.61448	1.55403	1.46064	1.26028	1.33324
1.10606	1.059	0.967111	0.835954	0.83911	0.769158	0.804562	0.806158	0.812279	0.854007	0.835755	0.800797	0.773549	0.715392	0.711631	0.766155	0.832793	0.868833	0.92071	0.815338	0.901979	0.826753	0.89162	1.04182	0.924718	0.964403	0.861884	0.869004	0.832688	0.741246	0.781076	0.740294	0.751976	0.830804	0.862108	0.866177	0.95852	0.985915	1.08194	1.29227	1.42184	1.35337	1.22991	1.3593	1.41417	1.29665	1.2061	1.27169	1.29906	1.3924
0.901427	0.918259	0.919213	0.967033	0.977295	1.01473	1.016	1.00921	0.973171	0.960677	0.963335	0.949963	0.994403	1.02659	1.08132	1.04685	1.00881	0.993325	1.029	1.03211	1.03965	1.03861	1.02952	1.0215	0.980059	1.05398	0.99561	1.00936	1.00528	1.01928	0.968924	0.992424	0.982101	1.12989	1.32122	1.47766	1.49052	1.58896	1.65121	1.7417	1.89662	1.73743	1.65356	1.78532	1.5922	1.56578	1.73311	1.77869	1.6672	1.7054
0.721379	0.663926	0.706532	0.72357	0.746333	0.713242	0.699684	0.704397	0.776877	0.775657	0.764705	0.734793	0.718354	0.730118	0.744031	0.597463	0.712067	0.6032	0.712397	0.588279	0.748632	0.71935	0.698337	0.723091	0.766261	0.807355	0.805406	0.813216	0.799619	0.612639	0.729376	0.742006	0.867533	1.07349	1.14669	1.26739	1.36944	1.42949	1.51997	1.58086	1.58544	1.43175	1.36848	1.35028	1.43776	1.45138	1.43418	1.53475	1.34738	1.38641
1.5667	1.48864	1.51272	1.56711	1.48644	1.52652	1.50573	1.4669	1.51536	1.2964	1.32396	1.30882	1.36158	1.3032	1.27772	1.29828	1.32344	1.3222	1.29321	1.21887	1.2876	1.21082	1.2518	1.17091	1.15687	1.20282	1.23997	1.19101	1.20477	1.14474	1.15137	1.14658	1.19624	1.30664	1.3294	1.43606	1.55818	1.65117	1.744	1.6571	1.75601	1.74034	1.71673	1.82501	1.81158	1.83339	1.89901	2.04119	1.88078	1.88127
0.82936	0.845202	0.904287	0.920608	0.986314	0.971772	1.0106	1.09248	1.03018	1.05295	0.994041	0.958364	0.89638	0.849774	0.897891	0.86995	0.891855	0.972113	0.923746	1.02395	0.869572	0.845992	0.936282	1.06585	1.10933	1.22323	1.08753	1.02049	1.11613	1.07464	1.05965	1.03758	0.946254	0.825189	0.806409	0.756739	0.787659	0.835956	0.800162	0.821626	0.844379	0.80353	0.767497	0.728589	0.731337	0.772018	0.767152	0.815296	0.800791	0.815383
0.787823	0.790291	0.808346	0.81687	0.818159	0.766282	0.773643	0.730933	0.792691	0.7552	0.652624	0.645032	0.678751	0.664616	0.711424	0.696817	0.708528	0.707015	0.720915	0.743679	0.753539	0.730137	0.711623	0.687103	0.702108	0.72925	0.697818	0.652415	0.646734	0.611457	0.615089	0.610922	0.640635	0.719585	0.837727	0.95615	1.02225	1.01358	1.17628	1.15131	1.18668	1.27836	1.1321	1.12863	1.13764	1.07677	1.22663	1.16559	0.967361	1.16602
0.847919	0.869376	0.902194	0.898685	0.804144	0.809358	0.75883	0.785868	0.760873	0.924111	0.904155	0.880625	0.915782	0.87067	0.821024	0.785152	0.715718	0.779008	0.764809	0.76358	0.74739	0.730263	0.712587	0.719061	0.713903	0.727615	0.682023	0.723669	0.682226	0.727623	0.7424	0.684297	0.733235	0.824929	0.875431	0.9389	0.993579	1.19611	1.15985	1.24916	1.27546	1.19812	1.24466	1.25779	1.1736	1.13135	1.20138	1.38603	1.30201	1.33486
0.664829	0.666054	0.654356	0.665457	0.604635	0.592881	0.604038	0.610419	0.611409	0.593142	0.608515	0.609182	0.619857	0.629353	0.60933	0.592936	0.547064	0.565087	0.603725	0.555182	0.596784	0.535548	0.547959	0.543388	0.542443	0.540214	0.539863	0.537856	0.585414	0.607645	0.582263	0.62655	0.672601	0.76056	0.868323	0.960181	1.02829	1.06642	1.11056	1.04963	1.08105	1.11955	1.15794	1.17339	1.23682	1.18992	1.09904	1.17913	1.14465	1.13001
1.45655	1.4629	1.44173	1.33791	1.41733	1.45615	1.44546	1.51422	1.5914	1.53578	1.44007	1.27679	1.16329	1.02811	1.0824	1.0357	1.06347	1.00639	1.04507	1.14494	1.32494	1.33521	1.48554	1.55097	1.56761	1.54769	1.49027	1.34547	1.37427	1.1646	1.41451	1.35423	1.20951	1.3622	1.61052	1.72046	1.66762	1.50998	1.35235	1.37696	1.53981	1.69998	1.77789	1.4581	1.41305	1.33254	1.37709	1.35213	1.37539	1.36632
0.773205	0.773221	0.78567	0.777828	0.782858	0.762661	0.794364	0.783129	0.752794	0.787657	0.735913	0.72566	0.715196	0.706012	0.726475	0.701322	0.667425	0.684327	0.658975	0.654601	0.630576	0.616882	0.614411	0.620835	0.602483	0.606401	0.588995	0.578235	0.586866	0.589309	0.611535	0.611693	0.639133	0.763382	0.86478	0.963776	1.05323	1.094	1.08486	1.07303	1.06607	1.08651	1.10245	1.1681	1.16719	1.15168	1.06994	0.986277	1.06099	1.01521
0.625016	0.603416	0.615054	0.605346	0.610681	0.584313	0.590436	0.612373	0.585058	0.597219	0.5959	0.550307	0.591826	0.589502	0.566424	0.572912	0.603082	0.5767	0.573099	0.560084	0.611824	0.561271	0.542439	0.526595	0.496062	0.518794	0.526091	0.526118	0.518172	0.536573	0.54497	0.521997	0.537027	0.622562	0.626016	0.654203	0.692731	0.694942	0.623969	0.64541	0.667401	0.643589	0.608544	0.618868	0.684787	0.60471	0.617524	0.624247	0.637289	0.575255
0.883147	0.935802	0.893701	0.86957	0.862975	0.874708	0.845052	0.83357	0.860976	0.894817	0.867959	0.802711	0.78819	0.779257	0.783047	0.826365	0.870418	0.828773	0.812544	0.772902	0.73047	0.782689	0.835328	0.857962	0.901066	1.01128	0.897822	1.0163	1.07869	1.1419	1.30488	1.33766	1.33604	1.64698	1.69562	2.27347	2.54167	2.53239	2.69733	2.63442	2.66099	2.56603	2.47781	2.01646	1.90568	2.10468	1.89387	2.00248	2.11109	2.20669
1.33441	1.28217	1.25944	1.21019	1.15669	1.10292	1.09594	1.00116	1.00087	1.12155	1.00778	0.979007	0.953139	0.913708	0.915707	0.909719	0.900235	0.887058	0.881906	0.885372	0.84669	0.818645	0.854486	0.823839	0.798505	0.827612	0.844074	0.820652	0.766284	0.823445	0.834744	0.755451	0.756423	0.891834	0.897322	0.980791	1.061	1.08617	1.17594	1.16959	1.31449	1.31792	1.33203	1.32186	1.31128	1.23446	1.22864	1.19928	1.12232	1.14315
0.833116	0.819326	0.843254	0.865721	0.810545	0.841602	0.812635	0.797863	0.773359	0.759982	0.745325	0.752584	0.754512	0.767657	0.749269	0.753568	0.701673	0.726812	0.741595	0.761148	0.742044	0.727021	0.72796	0.711526	0.697771	0.671872	0.718689	0.730471	0.737846	0.736544	0.747112	0.726394	0.7596	0.929663	1.12247	1.20546	1.3078	1.37729	1.39494	1.3841	1.42296	1.43167	1.52007	1.44611	1.45168	1.41313	1.4238	1.50032	1.45992	1.41724
1.87048	1.56792	1.33725	1.21215	1.07146	1.22914	1.236	1.19285	1.20696	1.10195	1.02518	0.891567	0.903745	1.20576	1.27247	1.29877	1.1231	0.993499	0.929167	0.809286	0.625632	0.663692	0.622381	0.711108	0.81505	0.895721	0.988704	0.903357	0.895853	0.928299	0.855263	0.753555	0.809176	0.817753	0.852585	0.86583	0.871387	0.815646	0.880919	0.822378	0.688556	0.74348	0.808756	0.874617	1.00132	1.02279	1.08743	1.17288	0.967074	0.88979
2.06603	2.0566	2.08948	2.11156	1.88499	1.91058	2.48726	2.31087	1.96381	1.90613	1.91827	1.84361	1.88128	1.88348	1.91743	1.9851	2.03821	1.96702	1.87581	1.75313	1.7377	1.75623	1.72583	1.88774	2.28581	2.21749	1.90928	2.25124	2.02906	1.73906	1.96137	2.0189	2.17111	1.77481	2.13996	2.55002	2.42342	2.51685	2.81739	1.7714	1.78403	1.79665	1.4933	1.51518	1.53707	1.80563	1.66912	1.54515	1.52629	1.69934
0.831613	0.863427	0.925419	0.832236	0.821654	0.779538	0.779924	0.764156	0.750143	0.703515	0.748535	0.74932	0.717928	0.68167	0.701222	0.650316	0.629396	0.621951	0.619955	0.631964	0.637803	0.655191	0.65787	0.609659	0.637551	0.617224	0.643945	0.623155	0.647859	0.618803	0.636901	0.617891	0.626025	0.837752	0.936292	1.03137	1.12292	1.15614	1.18161	1.29187	1.25437	1.19381	1.30086	1.205	1.13528	1.11863	1.08862	1.11349	1.0659	1.02545
1.11886	1.12205	1.08371	1.02426	0.968242	1.01591	1.02876	1.07138	1.01425	0.992658	0.971844	1.01531	1.01944	1.03179	1.05956	1.03103	1.0128	0.993469	0.995277	1.01411	0.934918	0.897216	0.877348	0.884923	0.883586	0.872075	0.879886	0.863359	0.843328	0.816334	0.797078	0.800595	0.891649	1.12473	1.29007	1.37559	1.43304	1.56643	1.61894	1.82321	1.70302	1.74782	1.66311	1.59655	1.74129	1.87235	1.76269	1.77151	1.73194	2.14961
1.43817	1.32961	1.36498	1.25248	1.27033	1.23186	1.15413	1.14595	1.1489	1.16303	1.0929	1.14288	1.06598	1.07738	1.05079	1.05373	1.00815	1.04875	1.03079	1.02752	1.08773	0.992192	1.01378	1.09631	1.1154	1.13613	1.19298	1.20616	1.20682	1.15311	1.13009	1.02529	1.12841	1.25118	1.31705	1.39328	1.3604	1.46	1.52795	1.52236	1.74536	1.2224	1.50024	1.47646	1.59824	1.59844	1.47454	1.52541	1.46703	1.69727
0.78356	0.826772	0.830687	0.822208	0.842168	0.785179	0.813579	0.803464	0.775741	0.762848	0.762787	0.742766	0.735353	0.71814	0.713359	0.725552	0.675516	0.666198	0.65552	0.682006	0.657423	0.623246	0.626983	0.599117	0.590687	0.620859	0.601482	0.576857	0.592516	0.604018	0.606568	0.597794	0.667436	0.855128	0.955709	1.02598	1.06356	1.15975	1.22158	1.20108	1.20063	1.17764	1.19931	1.25577	1.23811	1.22421	1.34173	1.3631	1.46901	1.48168
0.903444	0.902917	0.968967	0.933055	0.903246	0.95739	0.990753	0.90729	0.9989	1.05508	1.06184	1.01152	0.990502	0.999099	1.02465	1.0094	1.01935	0.998058	1.09235	0.972082	1.00184	1.02083	0.9366	0.939792	0.954534	0.97915	0.969379	0.943493	1.00434	0.89053	0.919753	0.84895	0.851738	0.986186	1.01101	1.15332	1.10896	1.11803	1.17454	1.232	1.49955	1.66219	1.52003	1.6552	1.62138	1.73169	1.64305	1.66316	1.63875	1.60238
1.28213	1.26857	1.26645	1.17122	1.09635	1.05366	1.01396	0.916992	0.867872	0.809606	0.791435	0.773292	0.761531	0.764547	0.720432	0.743941	0.706423	0.743321	0.745386	0.749678	0.748369	0.783172	0.744191	0.798023	0.793012	0.82361	0.851182	0.827474	0.759213	0.764143	0.856759	0.835382	0.964937	1.18867	1.36144	1.55916	1.65296	1.73008	1.67487	1.67235	1.67953	1.63764	1.83694	1.87374	1.90514	1.83576	1.89244	1.86899	1.86335	1.96494
0.728136	0.718202	0.7572	0.735574	0.719546	0.697124	0.757119	0.714303	0.763224	0.793444	0.870131	0.877533	0.953084	0.922123	0.87256	0.86537	0.837062	0.924686	0.875612	0.739702	0.713076	0.748964	0.686625	0.662895	0.604644	0.699814	0.612357	0.644554	0.559973	0.556248	0.583182	0.71121	0.808394	0.99169	1.08576	0.978665	1.07943	0.940381	0.91935	0.970889	1.00031	1.14172	1.3193	1.29129	1.26641	1.30424	1.44242	1.57798	1.61818	1.60534
1.46765	1.49208	1.45818	1.3892	1.36794	1.35208	1.32045	1.36706	1.27007	1.37042	1.34733	1.40979	1.34382	1.39453	1.4514	1.42993	1.37875	1.35477	1.42421	1.29204	1.21323	1.20271	1.16213	1.20417	1.21554	1.19655	1.20917	1.19256	1.1574	1.17051	1.22582	1.23683	1.2909	1.51587	1.59254	1.6272	1.63254	1.6212	1.66823	1.61052	1.53984	1.3984	1.56176	1.55333	1.61633	1.46898	1.50326	1.53055	1.54941	1.57684
0.987807	0.961524	0.970922	1.07421	0.95822	1.0687	1.00924	0.968823	1.03745	1.03418	0.944956	1.031	1.07363	1.11238	1.16523	1.03297	1.08077	1.17817	1.02687	1.08218	1.09968	1.1325	1.10035	1.11864	1.2139	1.18235	1.26399	1.24176	1.21669	1.19962	1.25464	1.24687	1.39194	1.94168	2.10639	2.34324	2.26924	2.58117	2.58473	2.39748	2.54191	2.43127	2.57674	2.47977	2.49092	2.6891	2.43293	2.50033	2.42807	2.45393
0.688179	0.6917	0.707296	0.715134	0.72507	0.706211	0.737351	0.787137	0.741343	0.716508	0.703781	0.677389	0.678588	0.63211	0.562275	0.549309	0.551845	0.550137	0.542627	0.565843	0.57781	0.544797	0.550509	0.518189	0.510774	0.514967	0.511308	0.520569	0.558081	0.560348	0.548805	0.527056	0.561486	0.632765	0.676764	0.738295	0.77977	0.82757	0.802925	0.842168	0.854447	0.884507	0.866855	0.932905	0.967615	0.990527	0.968964	0.969737	0.998465	1.00178
0.833555	0.830881	0.818581	0.837939	0.801096	0.683371	0.833644	0.864699	0.989401	0.929125	0.875479	0.909813	0.985587	1.01734	1.00952	1.04526	1.0119	0.99739	0.941444	0.876259	0.838128	0.843203	0.859521	0.929409	0.937198	0.912226	0.837012	0.817857	0.762128	0.759714	0.72858	0.733224	0.677068	0.71763	0.784561	0.874684	0.928558	1.00706	1.18278	1.04011	1.00274	1.04181	1.01706	1.03517	0.972847	0.734406	0.686894	0.639382	0.546869	0.59824
0.63884	0.616276	0.672385	0.622096	0.651217	0.663878	0.659756	0.760202	0.736893	0.751999	0.761415	0.7608	0.728265	0.701449	0.69542	0.602361	0.643374	0.645377	0.664993	0.761202	0.761476	0.829239	0.75272	0.829659	0.827196	0.852495	0.823829	0.820412	0.863258	0.725271	0.727955	0.895724	0.922723	1.2074	1.06042	1.11298	0.934397	0.923359	0.850124	0.723098	0.678371	0.763059	0.76264	0.775366	0.735846	0.773551	0.861371	0.88289	0.867842	0.884488
1.31313	1.24229	1.09064	0.972143	1.06134	0.984149	1.01212	1.00567	0.959363	1.02585	1.08035	1.08701	1.04731	1.08527	1.07212	1.05495	1.02012	1.02234	1.00139	0.990209	1.0703	1.04628	1.03384	1.07112	1.0079	0.834657	0.864818	0.929236	0.910506	0.953392	0.937513	0.956644	0.922188	0.986572	1.05414	1.11178	1.15126	1.1079	1.14012	1.20096	1.15692	1.10501	1.043	1.01606	1.10491	1.09793	1.1488	1.20446	1.18794	1.22122
0.782656	0.746182	0.794693	0.794049	0.755931	0.675909	0.632335	0.634297	0.649927	0.719398	0.754366	0.802491	0.790812	0.761329	0.873647	1.02238	1.01165	1.04	1.04605	1.00636	1.01959	1.10341	1.07568	1.08656	1.11762	1.13529	1.15169	1.20496	1.23584	1.26801	1.23188	1.22414	1.1277	1.26656	1.29169	1.35516	1.32896	1.36706	1.43099	1.42769	1.3537	1.31768	1.2795	1.16526	1.28883	1.18594	1.24358	1.36081	1.31216	1.18688
1.14289	1.0734	1.12694	1.18474	1.20769	1.22705	1.1536	1.07438	1.06847	1.04062	1.05431	1.05676	1.00054	0.948704	0.934587	0.883474	0.913914	0.826548	0.906512	1.16304	1.18075	1.21482	1.11648	1.13666	1.16946	1.14625	1.16159	1.1243	1.10495	1.05061	1.02939	1.06013	0.963703	1.14795	1.2026	1.36581	1.45297	1.6083	1.38636	1.52219	1.25923	1.5606	1.40048	1.61568	1.34953	1.42518	1.25588	1.26366	1.23701	1.34791
0.471739	0.498746	0.45809	0.471761	0.480864	0.449091	0.43966	0.601104	0.680533	0.670031	0.650707	0.659109	0.622587	0.639192	0.692822	0.539975	0.617284	0.566578	0.546114	0.588953	0.56772	0.547683	0.577731	0.604705	0.648284	0.661896	0.666321	0.6985	0.66226	0.654342	0.613904	0.63704	0.643359	0.774126	0.823345	0.906509	1.01202	1.16919	1.16495	1.20688	1.13156	1.06095	0.942065	1.05773	1.07595	1.12807	1.17507	1.18	1.30444	1.2246
1.42541	1.21768	1.4986	1.24846	1.30236	1.27242	1.2074	1.21352	1.15623	1.0616	1.21314	1.12346	1.13823	1.01555	1.25904	1.24338	1.31602	1.46654	1.5309	1.49863	1.44329	1.47823	1.51988	1.4252	1.36579	1.20956	1.32053	1.31999	1.32333	1.34276	1.23628	1.27674	1.42951	1.61193	1.53247	1.1887	1.29892	1.23824	1.3384	1.23009	1.16506	1.0121	0.901639	0.785044	0.688212	0.760062	0.955006	1.22333	1.1678	1.22645
1.01564	0.894763	1.00076	0.953708	1.03121	1.09779	1.05947	1.15224	0.969262	1.20905	1.10281	1.09243	1.1546	1.17928	1.23202	1.20562	1.01806	0.961765	0.890693	0.823552	0.851549	0.962334	0.968263	0.928346	0.887211	0.819575	0.875533	0.829164	0.848557	0.862317	0.963679	1.03957	1.07261	1.34784	1.49915	1.62153	1.73148	1.74043	1.80509	1.84633	1.96443	1.72034	1.52175	1.70238	1.90863	1.77095	1.93903	2.03111	2.05661	1.9501
1.00818	0.974286	1.00809	0.977096	1.02521	0.984622	0.966501	0.98583	0.868586	0.852646	0.888017	0.82027	0.801246	0.806978	0.804117	0.769991	0.779771	0.787402	0.730008	0.721422	0.692412	0.694022	0.673651	0.622175	0.640194	0.592429	0.635914	0.638992	0.63575	0.618836	0.592769	0.578782	0.651925	0.69584	0.721348	0.713414	0.740574	0.739086	0.759466	0.763984	0.77423	0.762603	0.74865	0.775619	0.772338	0.796926	0.808251	0.823854	0.796744	0.80506
1.50797	1.46818	1.44455	1.45353	1.41378	1.35661	1.24214	1.2459	1.22698	1.20003	1.16573	1.16891	1.20674	1.18371	1.30463	1.21554	1.21326	1.15096	1.21359	1.11078	1.0958	1.19266	1.19874	1.14433	1.24667	1.22149	1.2717	1.28577	1.30132	1.29794	1.311	1.31184	1.45183	1.58434	1.67712	1.619	1.5761	1.5999	1.75928	1.817	1.64296	1.64198	1.49091	1.46526	1.82944	1.8899	1.76681	1.82754	2.07582	2.28303
0.869739	0.865599	0.90504	0.943102	0.944431	0.877311	0.897027	0.870446	0.844479	0.888155	0.873504	0.862779	0.892679	0.938093	0.839539	0.840345	0.844872	0.90237	0.888493	0.864281	0.889534	0.847119	0.888408	0.864898	0.893895	0.92719	0.873699	0.775875	0.809632	0.803392	0.78931	0.84513	0.919309	1.01132	1.10467	1.19086	1.2626	1.27184	1.3021	1.54938	1.50712	1.48376	1.51247	1.58875	1.6109	1.58447	1.83414	1.6324	1.69043	1.70334
0.997102	0.987019	0.963641	0.903115	1.0189	0.879388	0.867879	0.869302	0.88316	0.921418	0.920866	0.944485	0.912316	0.939772	0.987093	0.986895	0.972839	1.00673	1.00603	1.04477	0.947902	1.04517	1.02247	1.00158	1.02202	1.06773	1.0332	1.10305	1.03043	1.01398	0.965865	0.881977	1.04368	1.15864	1.27272	1.28762	1.32258	1.16232	1.06901	0.963036	0.878789	0.902679	1.03109	1.0805	1.02617	1.05386	1.13338	1.38866	1.47072	1.43775
0.678411	0.696432	0.680352	0.677938	0.667172	0.668815	0.702872	0.682255	0.649327	0.664815	0.725375	0.668004	0.712161	0.766307	0.784696	0.828634	0.806762	0.762423	0.817382	0.803767	0.842055	0.832991	0.801058	0.777035	0.735909	0.738536	0.799273	0.802651	0.833833	0.911462	0.913122	0.883535	0.849214	0.971435	0.994918	1.05451	1.06106	1.15327	1.10145	1.08359	1.20005	1.06589	0.913539	1.03421	0.961451	0.990883	0.938624	0.939652	0.916024	0.995549
0.771988	0.698904	0.713612	0.656419	0.624546	0.766333	0.766339	0.859086	0.625475	0.60614	0.659096	0.825805	0.717607	0.838987	0.789129	0.739271	0.689412	0.659733	0.74766	0.634077	0.760625	0.57553	0.751877	0.61575	0.703395	0.596552	0.66635	0.680836	0.652605	0.649546	0.68213	0.719759	0.724004	0.850115	0.931132	0.91566	1.00905	1.01555	1.11239	1.07014	1.11361	1.12598	1.14756	1.19506	1.15306	1.03876	1.12988	1.08813	0.977898	1.04485
1.16447	1.0646	1.08166	1.07217	1.11864	1.19157	1.16775	1.42975	1.40373	1.25243	1.19457	0.987502	1.18407	1.14083	1.18947	1.1386	1.12632	0.979654	0.942047	0.812945	0.763713	0.700127	0.736345	0.79583	0.786478	0.802655	0.836158	0.922038	0.915996	0.90567	0.955275	0.90616	0.906285	1.00241	1.07035	1.11753	1.14013	1.08357	1.16445	1.23734	1.47713	1.55196	1.32902	1.30987	1.15937	1.14216	1.18202	1.06758	1.20272	1.29371
1.18947	1.20157	1.20983	1.1883	1.17546	1.04757	1.20348	0.949176	0.916198	0.985437	0.992608	0.929965	0.961157	0.884562	0.798083	0.863002	0.900547	0.97704	0.912962	0.8949	0.840317	0.858708	0.859315	0.887502	0.815837	0.89896	1.02101	1.02784	1.00511	0.97264	0.924921	0.891706	0.896431	1.04407	1.06929	1.20885	1.2392	1.28551	1.35854	1.30148	1.38328	1.27532	0.809135	0.843409	0.767693	0.799317	1.06129	1.17793	1.09468	1.15341
2.62711	2.49008	2.18077	1.96121	1.97269	1.94438	1.80852	1.95412	1.80071	1.67606	1.56879	1.65333	1.87612	1.86278	1.57296	1.52757	1.32165	1.36224	1.2439	1.22637	1.1105	1.03387	0.986894	0.885307	0.970227	0.891117	0.87239	0.876444	0.879502	0.841993	0.842785	0.819461	0.779158	0.809817	0.848942	0.896823	1.02152	1.03517	0.95847	1.02368	1.11101	1.07396	1.07382	1.05687	1.13044	1.26355	1.13334	1.17278	1.24537	1.30814
0.620411	0.654047	0.638185	0.624594	0.616122	0.626433	0.586888	0.591363	0.617201	0.590872	0.579779	0.557456	0.553769	0.521116	0.522608	0.473028	0.472274	0.466429	0.465492	0.498864	0.525595	0.525213	0.494216	0.506023	0.535572	0.524692	0.533351	0.521079	0.479156	0.482419	0.479361	0.470491	0.484891	0.532128	0.574534	0.609543	0.64525	0.6782	0.67437	0.665407	0.630308	0.610231	0.595369	0.592033	0.581307	0.604847	0.617055	0.55222	0.621825	0.610746
0.801217	0.871773	0.868397	0.853354	0.946693	1.01208	0.523241	0.337008	0.265629	0.318431	0.610474	0.848856	0.954342	1.00088	1.02281	1.08632	0.93964	0.832565	0.839397	0.840594	0.762372	0.747459	0.658609	0.680889	0.710562	0.748663	0.708092	0.76247	0.765853	0.782743	0.800725	0.771612	0.74057	0.91334	0.949017	0.929279	0.893567	0.942182	0.884658	1.0099	1.09507	1.24347	1.2766	1.36149	1.44944	1.48524	1.5935	1.46729	1.46265	1.58589
0.794267	0.828084	0.82649	0.885993	0.946776	0.893037	0.934948	0.933898	0.965695	0.880823	0.79309	0.785818	0.908279	0.894379	0.93562	0.993026	0.968964	0.985988	0.935256	0.933717	0.859592	0.851266	0.834619	0.902275	0.894734	1.01462	1.0157	0.967144	0.880516	0.901405	0.987823	0.968211	0.911437	0.915239	1.01932	1.18909	1.25751	1.37289	1.39479	1.36319	1.33465	1.3695	1.29543	1.37477	1.31916	1.52981	1.68794	1.72374	1.73645	1.50806
1.12756	1.22172	0.976321	0.948298	1.06069	0.974912	1.05107	0.957408	0.933599	0.947117	0.962546	0.992786	1.01609	1.02578	1.13597	1.19954	1.18808	1.22652	1.33253	1.23719	1.17632	1.18457	1.1693	1.11076	1.08409	1.05026	0.966684	0.973124	0.96853	0.91345	1.02037	1.0005	0.981246	0.997467	1.13255	1.24369	1.36519	1.37811	1.23797	1.38397	1.33498	1.30174	1.4035	1.21455	1.17257	1.38981	1.38155	1.25027	1.32101	1.37354
1.13292	1.00792	1.1174	1.08393	0.993232	0.986703	1.02392	0.996044	1.00749	0.947588	0.982146	0.940072	0.97963	1.05162	1.01798	1.11582	0.999241	1.02486	1.02593	1.08359	1.07371	1.06555	1.0236	0.980485	0.948019	0.941468	0.976688	1.02561	1.00132	0.882787	0.92905	0.891709	0.989367	1.2801	1.32945	1.58387	1.69078	1.97134	1.77866	1.81564	1.56627	1.6125	1.62397	1.68716	1.64388	1.64649	1.65372	1.62661	1.55554	1.53123
1.24488	1.27401	1.32867	1.21569	1.30823	1.23647	1.19877	1.18524	1.16985	1.21501	1.11374	1.11835	1.00964	1.05559	1.06892	1.04329	0.996404	0.9683	0.959085	0.981612	0.964603	0.939439	0.935051	0.9034	0.875065	0.900188	0.912358	0.847729	0.862092	0.799945	0.814795	0.877581	0.933989	1.11373	1.19406	1.25975	1.35025	1.41695	1.33434	1.39516	1.41365	1.49924	1.64912	1.747	1.61588	1.72134	1.54733	1.51961	1.50453	1.46704
0.583305	0.672892	0.743024	0.630418	0.596302	0.563785	0.523587	0.615792	0.767818	0.780677	0.764917	0.77842	0.753748	0.830123	0.76394	0.836866	0.852375	0.853777	0.789377	0.808133	0.783439	0.821988	0.884393	0.857825	0.806586	0.839405	0.830206	0.87835	0.839133	0.874305	0.8626	0.885233	1.02065	1.14554	1.25336	1.22425	1.49309	1.57576	1.70827	1.85568	1.72761	1.68644	1.58054	1.32866	1.28277	1.39084	1.34227	1.36239	1.29319	1.21661
0.859714	0.864567	0.898514	0.831366	0.797816	0.807187	0.797036	0.774509	0.770785	0.822447	0.806284	0.817574	0.78988	0.812552	0.787508	0.75007	0.796324	0.819719	0.755248	0.773748	0.727586	0.683645	0.713497	0.755789	0.781031	0.744567	0.803774	0.817948	0.802233	0.790159	0.774384	0.747603	0.784234	0.850358	0.869757	0.944888	0.954722	0.9916	0.971757	0.990166	1.00698	1.00126	1.03828	1.07824	1.11391	1.14657	1.17807	1.18707	1.1294	1.15048
0.756774	0.781755	0.811899	0.784394	0.792235	0.823005	0.789534	0.807861	0.816309	0.81696	0.811673	0.71139	0.642713	0.573314	0.658186	0.67461	0.598588	0.604957	0.590789	0.571385	0.573222	0.55359	0.556246	0.538269	0.523393	0.551589	0.563009	0.539143	0.51008	0.513578	0.540723	0.551274	0.569087	0.618179	0.67266	0.732497	0.734135	0.758471	0.687853	0.670918	0.621178	0.628541	0.665927	0.653224	0.666952	0.673581	0.713634	0.687675	0.685008	0.690211
0.306193	0.355449	0.270753	0.447329	0.335236	0.522591	0.566978	0.498076	0.802979	1.10788	1.35893	1.22325	0.793507	0.521468	0.44397	0.560215	1.14668	0.801784	0.745697	0.492522	0.49793	0.43502	0.540215	0.522355	0.629581	0.882906	0.876985	1.12128	1.19802	1.10527	0.825238	0.670087	1.04211	1.27212	1.29026	1.1721	1.3849	1.26874	1.19322	1.3068	1.23493	1.31177	1.5373	1.66154	1.46472	1.5649	1.68633	1.14626	1.21414	1.76769
0.940958	0.968295	1.00736	0.962415	1.01235	0.982298	1.02351	0.972736	0.94845	0.938166	0.861984	0.894266	0.897132	0.842176	0.909113	0.905127	0.831968	0.703243	0.756296	1.14265	0.369153	0.333801	0.326593	0.338785	0.385222	0.405715	0.737058	0.693775	0.81151	0.787235	0.83227	0.82957	0.868408	1.02511	1.30787	1.31964	1.58646	2.2006	1.77637	1.55415	1.57195	1.37988	1.62952	1.87163	1.92883	2.01308	1.85126	2.11737	1.77581	1.90895
1.22608	1.12134	1.08648	1.05374	1.09746	1.14542	1.2104	1.19093	1.19364	1.15691	1.15547	1.06374	1.15029	1.11422	1.0748	1.00431	0.940833	1.00945	0.956016	0.97319	0.943824	0.916948	0.874253	0.898889	0.876731	0.976882	0.976286	0.883363	0.952096	0.921575	0.840078	0.905658	0.872059	0.913159	1.01125	1.20439	1.23686	1.28757	1.2846	1.3114	1.79167	1.64695	1.56573	1.62106	1.62809	1.67155	1.66933	1.65721	1.5732	1.56423
	0.921884	0.988312	0.985791	1.04202	0.969199	1.01106	1.04761	1.17519	1.25337	1.18736	1.07226	1.18198	1.23511	1.39634	1.34452	1.28555	1.23138	1.19057	1.09728	1.09766	1.03999	1.16335	1.08265	1.06556	1.01939	1.04594	1.15287	1.21401	1.26822	1.25525	1.24164	1.21362	1.15921	1.10479	0.96565	0.969408	1.06559	1.07884	1.21627	1.22008	1.18905	1.16101	1.1144	1.06779	1.12714	1.07314	1.05958	1.00503	0.981215
			1.52167	1.03046	0.999927	0.860349	0.921319	1.00744	1.02246	1.06956	1.09508	1.10684	1.26866	1.31066	1.36101	1.18503	1.13577	1.20282	1.17796	1.27589	1.16442	1.06466	1.10305	1.12336	1.12765	1.20386	0.980245	0.890204	1.0188	1.10377	1.06185	1.10255	1.38488	1.63152	1.40364	1.54414	1.5958	1.58724	1.8007	1.72747	1.52161	1.49617	1.48996	1.4914	1.4942	1.36768	1.33576	1.45373	1.25846
			1.22401	1.12258	0.891458	1.02187	0.939611	0.889409	1.09693	1.05077	1.02853	1.02913	0.975089	0.918199	0.836058	0.828376	0.796341	0.820994	0.831853	0.812849	0.764756	0.789297	0.785458	0.763057	0.755323	0.758014	0.736574	0.726518	0.755464	0.740799	0.770343	0.815078	0.948533	1.06252	1.24573	1.30984	1.31409	1.26584	1.29205	1.45806	0.560523	0.286601	0.276962	0.318311	0.389617	1.06599	1.42373	1.50861	1.39089
			0.936472	0.991171	0.932514	0.831955	0.799557	0.798905	0.724799	0.722706	0.723284	0.710335	0.676216	0.736829	0.765889	0.720462	0.690821	0.62759	0.64748	0.694518	0.611151	0.62735	0.638118	0.657227	0.670673	0.666794	0.651682	0.6709	0.637354	0.630626	0.634156	0.719753	0.961172	1.17273	1.26181	1.40703	1.45518	1.48574	1.57036	1.50431	1.58431	1.55997	1.67861	1.70182	1.57832	1.54139	1.63677	1.73216	1.79818
				1.16043	1.2325	1.1269	1.20804	1.21171	1.26097	1.11756	1.06738	0.984561	0.920426	0.911674	0.832295	0.785186	0.802376	0.81777	0.8186	0.864481	0.860154	0.84793	0.868281	0.755134	0.738119	0.742612	0.742803	0.682406	0.637209	0.68273	0.675659	0.849274	0.966661	0.95262	0.896055	0.942855	1.10592	1.20474	1.33303	1.31108	1.34326	1.17223	1.12923	1.09281	1.17933	1.13688	1.17387	1.25017	1.29866
					1.03392	0.992054	0.923411	0.979101	0.898112	0.958716	0.948902	0.979279	0.941067	0.917429	0.90861	0.875359	0.875262	0.835528	0.879085	0.818287	0.739317	0.754008	0.788323	0.801145	0.795492	0.770752	0.734146	0.756004	0.782405	0.712761	0.700233	0.732333	0.865797	1.08947	1.17904	1.23534	1.31347	1.48007	1.51725	1.47509	1.50251	1.46103	1.41821	1.47409	1.70795	1.63892	1.52838	1.63377	1.56169
						0.707625	0.66579	0.75766	0.954741	1.04024	1.21227	1.15908	1.26081	1.36254	1.42041	1.40784	1.33588	1.44437	1.47807	1.49801	1.51796	1.50224	1.48651	1.47079	1.46534	1.3462	1.17829	1.13064	1.12802	1.30279	1.21484	1.30216	1.28335	1.42111	1.57689	1.71048	1.85409	1.8519	1.82969	1.82208	1.72139	1.83994	1.7268	1.66686	1.58534	1.66015	1.71894	1.65897	1.86583
						1.24513	0.630882	0.591221	0.785935	1.04783	1.34856	1.54085	1.13782	1.05454	1.13544	1.01164	1.05493	1.14183	1.06626	1.00423	0.994025	1.08502	1.04242	1.02175	1.00917	1.03319	1.03105	1.04627	1.06368	0.978602	1.01659	1.08234	1.31762	1.17394	1.36865	1.50573	1.48355	1.49278	1.5256	1.52585	1.30766	1.49434	1.3436	1.21039	1.14868	1.20511	1.27655	1.35364	1.34506
						1.25837	1.11642	1.03202	1.04296	1.00471	1.00545	1.00832	1.05449	0.940618	1.03529	1.04931	1.05146	1.08011	0.982033	1.03341	1.0848	1.13618	1.19573	1.25528	1.23643	1.27524	1.15071	1.17157	1.05223	1.23101	1.14896	1.11673	0.901452	1.00456	0.981894	0.929202	0.909888	0.931923	0.864625	0.862069	0.907323	0.921496	0.970242	0.914836	0.901058	0.993518	0.961654	1.0406	0.969327
							1.52413	1.10182	1.16184	1.31585	1.30138	1.40806	1.26016	1.04774	1.02968	0.935403	0.930363	1.00481	1.01816	1.08457	1.2595	1.17809	1.14496	1.16787	1.39106	1.36657	1.25687	1.14524	1.0811	1.20986	1.30498	1.37631	1.62999	1.9543	2.18988	2.00877	1.70119	1.67612	1.80642	1.40447	2.24869	2.37964	1.92147	2.0963	2.04383	2.07745	1.76569	1.66846	1.61658
							0.570611	0.625765	0.986088	0.382426	0.571504	0.575908	0.550936	0.539835	0.375146	0.72089	0.91316	1.03831	0.972775	0.864585	0.814755	0.72737	0.69969	0.630994	0.683198	0.63863	0.632096	0.681752	0.611413	0.646524	0.706182	0.766258	0.848756	0.920581	0.874319	0.938643	0.983164	1.07648	1.12218	1.12982	1.15593	1.03519	1.08366	1.16677	1.03347	1.03372	1.20165	1.12275	1.16188
							0.823311	0.981396	0.905134	0.900053	0.749948	0.528952	0.480987	0.596317	0.604889	0.631063	0.564873	0.631312	0.773512	0.820798	0.796918	0.759417	0.875999	0.874557	0.732539	0.793491	0.665722	0.603987	0.698084	0.621772	0.522276	0.591882	0.826492	0.926471	1.15074	1.04052	1.33251	1.20614	1.46585	1.21478	1.33255	1.06648	1.76402	1.29273	1.45721	1.58517	1.58286	1.49731	1.4001
							0.77793	0.692404	0.857616	0.758371	0.868023	1.0466	0.958557	0.957828	0.741717	0.992855	0.916556	1.16189	1.10712	1.20196	1.26908	1.43588	1.48608	1.3123	1.25277	1.20869	1.02148	0.972866	0.912149	0.918869	1.03749	1.06005	1.16915	1.36537	1.61157	1.64859	1.87289	1.95593	1.86779	2.23519	2.05316	2.07837	1.94651	1.71965	1.76552	1.76338	1.79714	1.69955	1.92735
								0.846065	0.780992	0.693952	0.742936	0.736375	0.832375	0.884121	0.929268	0.935114	0.98053	1.1351	1.11909	0.988285	0.952647	0.876271	0.816845	0.803333	0.81015	0.883997	0.860994	0.892404	0.893896	0.92163	0.954996	0.968932	1.12059	1.12796	1.19132	1.36775	1.3025	1.43983	1.53111	1.53819	1.55579	1.68088	1.70548	1.69156	1.65924	1.62051	1.79571	1.7938	1.90048
								0.677062	0.818306	0.838249	0.781765	0.672367	0.768401	0.741231	0.833646	0.790137	0.767359	0.448014	0.337004	0.417795	0.370606	0.375187	0.384768	0.57385	0.562054	0.626817	0.646008	0.584655	0.595937	0.713067	0.781907	0.861096	0.916932	0.981443	1.005	1.1268	1.10703	1.07245	1.08278	0.980519	0.981985	1.01959	0.974447	0.968777	1.05094	1.07409	1.06647	0.90577	0.845283
								0.611033	0.566214	0.545151	0.545462	0.550055	0.516699	0.513517	0.511881	0.541735	0.534385	0.51748	0.526795	0.538322	0.515236	0.489049	0.494614	0.485906	0.479981	0.481187	0.508702	0.504991	0.484896	0.486154	0.492341	0.481378	0.549565	0.658046	0.679172	0.661654	0.699082	0.722599	0.700778	0.762524	0.771942	0.738441	0.663372	0.708394	0.664517	0.652132	0.591913	0.568898	0.580985
									0.824342	0.799756	0.822702	0.888851	0.848217	0.902705	0.8732	0.851244	0.897581	0.889937	0.866748	0.929742	0.956768	0.941557	0.900996	0.898798	0.935234	0.91497	0.928065	0.94252	0.950337	1.00342	0.960815	0.969763	1.14038	1.17293	1.43587	1.48268	1.6397	1.53861	1.75411	1.70936	1.67732	1.60076	1.72146	1.81488	1.65732	1.69352	1.6618	1.49136	1.4964
									0.973059	0.953543	0.898589	0.985927	0.946728	0.884756	0.895037	0.881214	0.919242	0.887211	0.904054	0.799907	0.793149	0.770375	0.740955	0.698481	0.681631	0.674204	0.669633	0.596803	0.595712	0.614324	0.622595	0.722217	0.761152	0.845373	0.975711	0.9718	1.08625	1.15226	1.1507	1.1872	1.23781	1.22991	1.23975	1.22344	1.17865	1.23773	1.21303	1.19669	1.17022
									1.93766	1.75628	1.59149	1.52728	1.58989	1.58847	1.77939	1.91597	1.74147	1.71257	1.5652	1.471	1.36179	1.29722	1.33622	1.29446	1.27962	1.25178	1.21467	1.19492	1.02585	1.00034	0.971702	1.03547	1.11128	1.25512	1.6623	1.76537	1.87408	2.09273	2.08355	2.1432	2.18894	2.11682	2.3507	2.17949	2.16788	2.08597	2.01804	1.87441	1.78978
Replicate 2
0.857306	0.861487	0.841214	1.039	1.11522	1.12666	1.07398	1.12703	1.19216	1.20137	1.19352	1.30044	1.15581	1.01532	0.995484	0.992372	0.972478	1.01984	0.900918	0.924224	0.901111	0.850699	0.891331	0.871852	0.980731	0.94425	0.945914	1.02173	0.957928	0.972707	0.993328	0.970043	1.01339	1.1537	1.22402	1.17271	1.1909	1.27256	1.34989	1.42826	1.52992	1.59667	1.70628	1.70838	1.78656	1.86925	1.98887	2.01771	1.99617	1.90027
1.21589	1.26636	1.30606	1.41029	1.41147	1.54923	1.3144	1.36942	1.44018	1.55641	1.65012	1.69485	1.75996	1.57469	1.5497	1.42796	1.51626	1.65904	1.3846	1.27866	1.32599	1.37469	1.31845	1.09382	1.2096	1.25075	1.2595	1.2836	1.44527	1.42947	1.35636	1.48625	1.43463	1.5981	1.62499	1.67439	1.54386	1.63341	1.57728	1.77274	1.52016	1.49344	1.53491	1.49494	1.47107	1.57299	1.80547	1.75672	1.83201	1.81554
1.24044	1.12974	1.18647	1.21408	1.25248	1.33706	1.36529	1.34632	1.19605	1.46604	1.39801	1.23806	1.16361	1.24921	1.23168	1.16919	1.15317	1.1313	1.17345	1.18352	1.19964	1.24424	1.19902	1.14548	1.14932	1.06995	1.20118	1.21776	1.12822	1.12118	1.10798	1.17073	1.18622	1.19694	1.31526	1.32159	1.39605	1.50013	1.39639	1.32697	1.3567	1.26786	1.35615	1.36705	1.43425	1.35837	1.42184	1.47009	1.5315	1.58995
0.705333	0.757598	0.728057	0.69769	0.802775	0.728874	0.697194	0.702117	0.693612	0.681398	0.729704	0.718879	0.77292	0.748855	0.658912	0.63521	0.799416	0.67744	0.627152	0.719282	0.741244	0.761025	0.717112	0.685734	0.729784	0.722025	0.706838	0.70555	0.689219	0.636647	0.656112	0.656865	0.765434	0.947157	1.03604	1.09918	1.26218	1.4064	1.2886	1.24055	1.28296	1.23055	1.34246	1.4669	1.39973	1.43804	1.63049	1.41543	1.17534	1.20913
1.1852	1.13755	1.07038	1.0535	1.07994	1.12538	1.08395	1.16148	1.07711	1.03103	0.965351	0.916241	0.895039	0.979592	1.02098	0.993121	0.93278	0.935261	0.912869	0.98633	0.990247	1.01782	1.02949	1.0475	1.00722	0.973194	0.910782	0.853942	0.828234	0.837669	0.907915	0.866557	0.961045	1.17169	1.31311	1.47103	1.62801	1.70923	1.70857	1.87131	1.73745	1.8249	1.67637	1.59631	1.62671	1.82045	1.91729	1.81955	1.79834	1.77782
0.584659	0.593848	0.595626	0.5716	0.662988	0.686764	0.670316	0.700208	0.729303	0.702609	0.707187	0.803332	0.736036	0.805236	0.793635	0.736454	0.710084	0.697461	0.701453	0.645395	0.62546	0.618091	0.673235	0.673723	0.692372	0.668206	0.684015	0.728464	0.776111	0.754173	0.824807	0.736132	0.778834	1.12065	1.4017	1.67541	1.70682	1.82534	1.92239	2.07148	2.12767	1.97051	1.9425	2.12558	2.22466	2.40521	2.32768	1.97287	1.64732	1.60447
0.742144	0.64499	0.784785	0.78234	0.854851	0.901531	0.954369	0.921567	0.931102	1.10142	1.13803	1.10461	1.06668	1.0528	1.07126	1.07418	1.01219	0.97792	1.02015	0.980726	1.0324	1.05597	1.09175	1.05288	1.00015	0.952221	0.921343	0.844862	0.804193	0.811853	0.790077	0.731264	0.926791	1.25751	1.48215	1.36784	1.72826	1.53067	1.66968	1.67156	1.59555	1.50961	1.36384	1.26999	1.27216	1.02585	0.988919	0.989769	0.899781	0.874886
1.16414	1.06082	1.21045	1.246	1.20873	1.39207	1.33394	1.35636	1.38698	1.33863	1.4164	1.38209	1.43409	1.56037	1.52132	1.48694	1.41559	1.44997	1.29489	1.29869	1.18787	1.21369	1.21778	1.25698	1.25125	1.16921	1.51388	1.44141	1.35898	1.36133	1.50415	1.37965	1.56223	1.94706	1.88355	1.5112	1.49075	1.71437	2.0496	1.94074	1.51078	1.40661	1.30425	1.18827	1.0556	1.04783	1.0368	0.951537	0.92503	0.997611
0.979853	1.04269	1.03512	0.980864	0.997297	0.974591	0.910194	0.926538	0.929849	0.971382	0.946109	0.919721	0.943868	0.891601	0.929078	0.956652	0.898075	0.917115	0.902949	0.896622	0.88017	0.927506	0.964248	0.968677	0.951053	0.928471	0.978808	0.994467	0.934353	0.893873	0.948639	1.00539	1.07691	1.24819	1.42167	1.46382	1.46111	1.62235	1.5863	1.59092	1.64101	1.61153	1.53314	1.74045	1.58658	1.52797	1.49123	1.55269	1.4621	1.45596
0.900475	0.928218	0.942484	0.935394	0.909682	0.884258	0.903653	0.903361	0.953876	0.96542	0.929613	0.957135	0.935016	0.953109	0.979013	1.00934	0.985266	0.971665	0.980528	0.96617	0.991912	1.00635	0.962853	0.956068	0.924059	0.923643	0.923271	0.923918	0.91994	0.961612	0.960631	0.951676	0.947788	1.14418	1.38326	1.59596	1.65109	1.67074	1.83695	1.96391	1.91817	1.91952	1.96634	2.03731	1.82418	1.82542	1.92272	2.06083	2.064	2.07208
1.01097	1.01354	0.933362	1.10738	1.26253	1.31935	1.23865	1.14846	1.15749	0.955432	1.04314	1.02074	1.00283	1.06407	1.04369	1.06517	0.926658	0.992323	0.940961	0.928318	0.849397	0.843623	0.908678	0.93777	0.936807	0.901053	0.936562	1.02527	0.991808	1.1246	1.01192	0.975175	0.948327	1.04089	1.03175	1.00067	1.25167	1.10411	1.0794	1.11017	1.09641	1.16173	0.98832	0.927061	0.999265	0.982062	1.02151	0.964826	0.89787	0.834037
1.46544	1.49622	1.61298	1.66702	1.7879	1.72762	1.565	1.37891	1.28158	1.2627	1.22209	1.22	1.03381	1.06732	0.975048	0.920914	1.1866	0.963823	0.949564	1.07908	0.940346	0.973227	1.11739	1.04608	1.06208	1.07139	1.04103	1.0014	0.925663	0.977509	0.991896	0.938434	1.04476	1.1486	1.18489	1.23941	1.34175	1.29866	1.27058	1.10172	1.22034	1.23879	1.17741	1.18647	1.31978	1.21319	1.18574	1.21982	1.10775	1.22793
1.13345	1.01797	1.02886	1.03984	1.04969	1.09298	1.09374	1.07657	1.05121	1.06774	1.06549	1.09586	1.13943	1.09377	1.33513	1.23704	1.15151	1.17734	1.15567	1.22812	1.32126	1.35914	1.39004	1.33395	1.19492	1.22046	1.26016	1.23485	1.22431	1.25928	1.13853	1.16352	1.12855	1.17344	1.25108	1.3629	1.37884	1.44664	1.37079	1.45441	1.41701	1.52172	1.58305	1.67077	1.65546	1.75766	1.75437	1.86255	1.73745	1.82696
1.1215	1.06797	1.06179	1.0248	1.00834	1.11628	1.09874	1.02547	1.11469	1.09276	1.04777	1.00763	1.16283	1.10536	1.03003	1.11317	1.09497	1.09974	1.12503	1.08061	1.06254	1.05072	0.955052	1.17256	1.1278	1.05067	1.06689	1.15917	1.17085	1.22283	1.21829	1.21362	1.1339	1.38651	1.5638	1.57639	1.69932	1.70778	1.67602	1.85914	1.7511	1.60662	1.76425	1.6824	1.70937	1.90649	1.874	1.81533	1.72909	1.84575
1.02021	1.05422	1.07099	1.09082	1.03206	1.04676	1.07659	1.11851	1.09988	1.15676	1.1253	1.12977	1.13129	1.10794	1.123	1.0903	1.05977	0.957394	0.965376	0.943381	0.957834	0.991585	0.945308	0.881608	0.867743	0.860248	0.81624	0.824439	0.880029	0.888186	0.866859	0.926977	0.978932	1.23085	1.42682	1.56313	1.59741	1.7221	1.71091	1.63427	1.64365	1.7727	1.81645	1.78609	1.83175	1.89405	1.93957	1.9966	2.02842	1.92604
0.765103	0.728303	0.728097	0.695711	0.690355	0.690007	0.676655	0.654099	0.63569	0.625552	0.604938	0.653592	0.610529	0.581974	0.576002	0.579502	0.619068	0.544709	0.613902	0.620707	0.616355	0.626507	0.594205	0.583862	0.559922	0.548761	0.506987	0.497901	0.486097	0.510984	0.514593	0.503484	0.560741	0.606901	0.686869	0.757573	0.795101	0.850426	0.810742	0.838499	0.767305	0.750295	0.779146	0.806016	0.782033	0.791433	0.765686	0.811792	0.782401	0.754141
1.0659	1.02172	1.0306	0.993138	0.975918	0.957756	0.964883	0.88542	0.896329	0.928353	0.880079	0.947762	0.902955	0.907813	0.879021	0.855861	0.905345	0.897248	0.887585	0.922757	0.854504	0.898452	0.877695	0.896901	0.905137	0.88262	0.877746	0.859016	0.852905	0.875295	0.902999	0.950719	0.941309	1.19434	1.41896	1.57412	1.73287	1.78213	1.78882	1.87006	1.90655	1.88192	1.86234	1.92667	1.9006	2.04219	2.02714	2.00822	2.02996	1.94282
1.42522	1.36049	1.50961	1.54006	1.53292	1.40156	1.42712	1.45303	1.52313	1.59684	1.60302	1.41681	1.47068	1.4194	1.47235	1.48282	1.44769	1.43078	1.45153	1.35806	1.379	1.35719	1.40125	1.3469	1.42469	1.4257	1.40892	1.52728	1.45827	1.43655	1.39932	1.38117	1.30552	1.53843	1.75896	1.80929	1.89955	1.96192	1.87861	1.9192	1.94735	2.05671	2.0579	1.99094	1.86377	1.86702	1.94182	1.85545	1.83616	1.91902
0.489428	0.478933	0.49713	0.494829	0.483794	0.463009	0.46147	0.468197	0.460229	0.448321	0.430616	0.41766	0.397025	0.399798	0.435488	0.460641	0.432402	0.451665	0.435117	0.426764	0.450787	0.433753	0.437654	0.443107	0.436796	0.421714	0.417111	0.444915	0.422508	0.440368	0.448922	0.451875	0.565933	0.779978	0.887078	1.0234	1.06647	1.10732	1.20159	1.12337	1.08282	1.13962	1.13058	1.15925	1.13331	1.10176	0.979273	1.06908	1.028	0.983335
0.908628	0.869155	0.818367	0.812684	0.854187	0.88004	0.884343	0.862468	0.90736	0.93816	0.932081	0.876136	0.894599	0.932754	0.91048	0.916362	0.910471	0.847352	0.865019	0.896914	0.918616	0.940295	0.930756	0.912205	0.937519	0.90492	0.946382	0.996939	0.935089	0.967436	0.922358	0.926899	0.92065	1.08386	1.30124	1.45846	1.50116	1.66066	1.42793	1.48216	1.62223	1.82425	1.69321	1.59773	1.58926	1.76781	1.734	1.7101	1.79962	1.78676
0.996464	1.04833	1.04465	1.08411	1.04969	0.99564	1.00362	0.990337	0.931098	0.934148	0.949581	0.958751	0.921548	0.902878	0.944209	0.95357	0.917587	0.964954	0.905779	0.920218	0.972698	0.947187	0.934129	0.926159	0.921167	0.931705	0.905319	0.843072	0.894823	0.88558	0.891244	0.950053	0.960966	1.29853	1.60799	1.70152	1.70254	1.75112	1.70015	1.72695	1.56952	1.66421	1.77383	1.76996	1.98613	1.92226	1.90053	1.59225	1.68387	1.66369
0.609059	0.610321	0.595413	0.628236	0.664848	0.671621	0.722252	0.710846	0.752758	0.760552	0.79491	0.79865	0.796113	0.821529	0.851767	0.821264	0.818818	0.8161	0.793211	0.793328	0.741287	0.749169	0.743217	0.75329	0.724798	0.71382	0.68696	0.729643	0.687942	0.677716	0.700897	0.675447	0.74173	0.895677	1.09233	1.09832	1.19325	1.16806	1.21057	1.24199	1.19621	1.25206	1.24473	1.32559	1.31195	1.34923	1.30984	1.29836	1.25529	1.26532
0.67038	0.731256	0.739896	0.751031	0.774032	0.733205	0.750674	0.701945	0.773829	0.698712	0.745655	0.800957	0.816366	0.782065	0.821018	0.852057	0.810588	0.783608	0.810976	0.784423	0.767025	0.774952	0.812726	0.805328	0.788891	0.798344	0.777795	0.784458	0.776995	0.753468	0.816666	0.869177	0.898548	1.12679	1.36753	1.41186	1.53531	1.51256	1.65993	1.52589	1.55133	1.53141	1.57967	1.66727	1.61696	1.62871	1.85193	1.83632	1.99889	2.15907
0.942594	1.02657	0.991038	0.948642	0.983045	0.943682	0.962579	1.0104	1.01528	1.02862	1.042	1.09399	1.1325	1.11819	1.10393	1.10458	1.11894	1.12477	1.05424	1.00705	0.961379	0.965244	0.825796	0.893908	0.955399	0.95218	0.957206	0.945968	0.901617	0.890793	0.884176	0.8624	1.04483	1.2284	1.37426	1.5231	1.59824	1.50619	1.50186	1.38906	1.36687	1.35504	1.47666	1.48423	1.44324	1.44738	1.51448	1.55464	1.449	1.42168
0.620288	0.655359	0.611307	0.637834	0.615554	0.626374	0.638444	0.65049	0.646789	0.65885	0.645855	0.6269	0.622104	0.635011	0.623945	0.650079	0.615772	0.613109	0.600178	0.609418	0.626707	0.613572	0.594025	0.588837	0.594196	0.582573	0.610729	0.562685	0.555125	0.58999	0.550088	0.555992	0.634118	0.676581	0.697516	0.715593	0.770879	0.793355	0.778245	0.690742	0.739156	0.859144	0.714602	0.668102	0.712212	0.732203	0.717923	0.761341	0.729215	0.653315
0.242106	0.117445	0.106741	0.645038	0.474463	0.73714	0.700176	0.779757	0.660248	0.505084	0.544724	0.582754	0.542804	0.665145	0.644346	0.625749	0.662626	0.584663	0.528764	0.560084	0.514883	0.564078	0.5453	0.568251	0.572511	0.618592	0.63351	0.679406	0.708594	0.660347	0.645099	0.698172	0.781166	0.897079	1.02814	1.218	1.42732	1.55032	1.5253	1.57609	1.54267	1.60664	1.43194	1.33119	1.40805	1.50723	1.56114	1.65859	1.76872	1.85059
1.35271	1.21534	1.17506	1.1196	1.1641	1.19392	1.10247	1.07547	1.04598	0.985255	1.00626	0.992792	0.965103	0.963677	0.948623	0.965931	0.983691	0.950016	0.913297	0.850845	0.8842	0.920517	0.922	0.893598	0.93216	0.913214	0.830248	0.956463	0.969932	0.92628	0.897052	0.937376	0.910864	1.09797	1.31647	1.52402	1.57836	1.66052	1.65415	1.5863	1.54205	1.66772	1.77497	1.67969	1.84829	1.85988	1.74161	1.77988	1.80035	1.72452
0.614156	0.634623	0.620055	0.623789	0.629785	0.684299	0.646501	0.607344	0.61182	0.606199	0.585809	0.590074	0.584729	0.600056	0.627591	0.643938	0.62888	0.589543	0.579835	0.596424	0.623842	0.594716	0.571245	0.572761	0.53882	0.543209	0.558327	0.549368	0.53427	0.541207	0.531323	0.512002	0.574828	0.654425	0.698213	0.697905	0.703632	0.626733	0.693097	0.7	0.700794	0.724809	0.755109	0.758774	0.774482	0.828889	0.828246	0.785258	0.822169	0.785614
0.983749	0.883255	0.907898	0.953477	0.954085	0.99074	1.02988	0.943733	0.962173	0.995338	1.01366	1.03029	1.03817	1.01679	1.07355	1.01278	0.981018	0.96543	0.965319	1.01212	1.01547	1.0212	1.01479	0.96358	0.982454	0.969517	1.17152	1.0867	1.07758	1.04785	1.02947	0.979137	1.06215	1.21409	1.36401	1.31411	1.34616	1.45002	1.45151	1.47058	1.29073	1.34267	1.38694	1.29525	1.32572	1.33446	1.38787	1.45384	1.47246	1.42945
1.03702	1.10009	1.08951	1.10814	1.08007	1.17148	1.08422	0.993297	0.998007	0.936389	0.97989	1.01002	1.04213	0.912633	0.973571	0.897079	0.919473	0.92525	0.916988	0.891699	1.01576	0.897499	0.962681	0.877938	0.886298	0.902157	0.898606	0.937102	0.939057	0.944187	0.969413	0.908778	1.07219	1.12834	1.26725	1.35075	1.34144	1.09533	1.397	2.34678	1.92757	1.60894	1.44605	1.48036	1.41885	1.56787	1.72222	1.72642	1.83979	1.69785
1.04698	1.059	1.08498	1.05325	1.08784	1.0156	1.01441	0.9892	1.02386	1.02847	1.05477	1.00601	0.990393	1.02391	1.03454	1.0063	0.972991	0.922934	0.877242	0.908887	0.975629	0.966668	0.976318	1.02719	1.04861	0.974251	1.0341	1.0592	1.04506	1.01542	0.988	0.90666	1.00572	1.23567	1.32277	1.21031	1.25477	1.41862	1.40961	1.43627	1.52417	1.38435	1.50521	1.43114	1.42786	1.28653	1.34515	1.2863	1.33567	1.61555
0.816349	0.82503	0.820145	0.870795	0.907968	1.04214	1.24577	0.563157	0.23668	0.346737	0.406657	1.03586	1.12754	1.0397	0.721428	0.448776	0.468609	0.544637	0.634627	0.727124	0.851695	0.957928	0.973887	1.02527	0.93713	0.958108	0.989731	0.983953	0.956639	0.934132	0.927001	0.855812	0.934844	1.13965	1.30316	1.38945	1.4667	1.41875	1.50435	1.49357	1.47812	1.46661	1.48847	1.64473	1.6344	1.66839	1.69057	1.78059	1.73041	1.74235
0.851221	0.849496	0.891777	0.870176	0.900957	0.917123	0.92154	0.902071	0.913477	0.934913	0.923116	1.04509	1.32851	0.645842	0.474077	0.440678	0.392287	0.352973	0.391805	0.484968	0.520958	0.877794	0.866609	1.11165	1.1136	1.23163	1.29389	1.23829	1.28486	1.27369	1.28691	1.22729	1.19935	1.33036	1.49626	1.66513	1.61664	1.80231	1.708	1.66469	1.68819	1.77667	1.98652	1.65784	1.81979	1.77303	1.7702	1.91596	2.16791	2.53184
1.04728	1.11586	1.15583	1.08365	1.14123	1.14721	1.29151	1.25285	1.16719	1.30737	1.17552	1.19985	1.18976	1.2732	1.19478	1.29849	1.30516	1.32223	1.32317	1.32061	1.35888	1.35145	1.39524	1.28845	1.3388	1.30101	1.43114	1.31764	1.32274	1.4298	1.34217	1.43182	1.58733	1.56324	1.58131	1.39321	1.44739	1.30141	1.3212	1.24958	1.24842	1.16364	1.2589	1.28792	1.23018	1.2334	1.2381	1.18535	1.26943	1.21041
1.38099	1.1989	1.26351	1.21649	1.22524	1.27428	1.33129	1.23461	1.35441	1.28902	1.33519	1.30529	1.35271	1.22933	1.3702	1.3281	1.339	1.43957	1.34677	1.41259	1.40209	1.31794	1.41419	1.43716	1.44838	1.43326	1.51414	1.45543	1.55701	1.44214	1.35097	1.56353	1.53927	1.71812	1.71768	1.87382	1.83131	2.19426	1.78669	1.63521	1.70757	1.81804	1.97996	1.98119	1.78331	1.83527	1.76866	1.73345	1.77325	1.7353
1.33256	1.21087	1.2228	1.28044	1.23196	1.35653	1.17371	1.1336	1.21132	1.09404	1.16586	1.08591	1.04116	0.873503	0.900203	0.925524	0.937343	0.939538	0.961858	1.0224	0.986541	1.0189	1.03717	0.975426	1.0421	0.901691	0.941221	0.949998	0.918273	0.900535	0.892417	0.974315	0.980958	1.04636	1.13683	1.11413	1.14329	1.24332	1.11401	1.27314	1.22731	1.36357	1.51546	1.45872	1.4458	1.46746	1.42286	1.53749	1.47414	1.49076
2.37733	2.36379	2.47787	2.34573	2.48125	2.45719	2.38725	2.36035	2.14083	2.04445	2.0042	2.04328	1.88844	2.00339	1.86846	1.99594	1.87985	1.98139	1.83635	1.68304	1.74944	1.64099	1.6999	1.69388	1.61381	1.42018	1.3972	1.48085	1.44569	1.39186	1.42118	1.48279	1.47222	1.64491	1.72151	1.77826	1.85795	2.03249	1.95427	1.9299	1.85962	1.84079	2.04084	1.85814	1.9465	1.81906	1.91105	1.92813	1.69117	1.70394
1.0408	0.959992	0.970419	0.978227	0.994422	0.952148	1.03302	1.02873	1.00311	1.03002	1.03488	1.04029	1.02363	1.02488	1.04596	1.09345	1.08464	1.01163	1.04878	1.0228	1.06509	1.00826	1.03601	1.06717	1.0394	1.08315	1.1051	1.08879	1.10074	1.08157	1.10908	1.0813	1.30905	1.35513	1.54716	1.66659	1.60739	1.62839	1.51405	1.46223	1.51676	1.47825	1.66903	1.72473	1.64537	1.66822	1.67041	1.64042	1.59258	1.67356
1.45047	1.27733	1.27343	1.21434	1.18815	1.29389	1.26975	1.18495	1.23901	1.19953	1.17102	1.19305	1.23856	1.30915	1.30847	1.4029	1.34316	1.43758	1.50051	1.23964	1.39733	1.42594	1.36292	1.26306	1.32936	1.37645	1.17304	1.35844	1.34295	1.34474	1.37861	1.50362	1.51189	1.37523	1.46191	1.5789	1.67611	1.66161	1.69	1.58478	1.62642	1.51073	1.671	1.50291	1.47497	1.44364	1.37222	1.42323	1.30716	1.29808
1.587	1.59113	1.36339	1.33159	1.35237	1.22039	1.28961	1.38683	1.46273	1.40063	1.58464	1.6103	1.50835	0.997971	1.60945	1.4915	1.39748	1.34795	1.45342	1.53289	1.49457	1.58971	1.65065	1.85339	1.76319	1.77034	1.81686	1.71784	1.69711	1.7038	1.64074	1.55468	1.29642	1.54478	1.71001	1.72171	1.41281	1.36951	1.30515	1.72064	2.09343	1.87017	1.76995	1.66421	1.60482	1.81631	1.31011	1.11869	1.21182	1.25422
0.663548	0.782084	0.83324	0.793425	0.7521	0.777022	0.826369	0.855128	0.793299	0.702937	0.754552	0.766454	0.811062	0.750854	0.763106	0.70865	0.752653	0.646845	0.676958	0.629223	0.703835	0.706595	0.647949	0.697026	0.74055	0.753361	0.754369	0.77189	0.737564	0.77262	0.781551	0.705744	0.801783	1.05449	1.30249	1.43621	1.65065	1.85037	1.73562	1.67295	1.83061	1.72745	1.72782	1.8096	1.74765	1.82195	1.89772	1.90287	1.64192	1.68495
0.670638	0.708536	0.664016	0.694867	0.671235	0.670995	0.796983	0.832742	0.791642	0.804836	0.86358	0.906041	0.884692	0.812401	0.843151	0.801413	0.809706	0.855777	0.784588	0.948054	0.869663	0.90352	0.98864	1.06717	0.966354	0.936673	0.982659	0.907761	0.866108	0.926705	0.909736	0.926308	1.0367	1.18844	1.31188	1.41521	1.41424	1.46872	1.5702	1.55395	1.3747	1.49169	1.55058	1.51865	1.46929	1.39564	1.633	1.65298	1.32827	1.36002
1.23641	1.2498	1.1877	1.1186	1.03224	1.03881	0.957551	0.985929	0.966075	0.919431	0.865857	0.879176	0.903782	0.953956	0.969655	0.939025	0.938674	0.881065	0.882173	0.950498	0.871573	0.962783	0.973338	0.859712	0.838973	0.905986	0.976715	0.924301	1.03572	0.954003	0.9459	0.974769	1.05113	1.21835	1.38565	1.52771	1.59986	1.70722	1.73145	2.01592	1.80884	1.75543	1.68623	1.81221	1.71833	1.84336	1.8393	1.68821	1.54272	1.54076
0.959465	0.901408	0.97548	0.943491	1.05483	1.02023	1.11736	0.980017	1.00397	0.977892	1.01519	1.01436	1.0302	1.02302	0.961076	0.88726	0.977252	0.942419	0.976454	0.941888	0.936756	1.02746	0.994988	1.05538	1.01881	0.926552	1.04865	1.10007	1.01186	1.06394	1.04054	1.00465	1.07206	1.26777	1.3471	1.43597	1.48064	1.57963	1.5363	1.72874	1.68077	1.69094	1.81683	1.83131	1.7748	1.7457	1.72052	1.74688	1.77417	1.81201
1.44976	1.29709	1.52529	1.39525	1.41766	1.47318	1.40146	1.406	1.40698	1.53395	1.41079	1.52905	1.53317	1.55817	1.578	1.58156	1.4399	1.3862	1.28903	1.33523	1.38562	1.38316	1.34853	1.30877	1.47207	1.2842	1.45488	1.44666	1.39054	1.43929	1.45744	1.36891	1.4239	1.675	1.85743	2.00611	1.9295	2.22774	1.94349	2.04777	1.80848	2.10334	1.98712	2.02811	1.80215	2.01621	1.88816	1.99248	1.81173	2.01971
0.497281	0.50887	0.518969	0.51828	0.523778	0.518562	0.579593	0.593615	0.611569	0.592472	0.638664	0.6658	0.653296	0.640334	0.649197	0.61603	0.582506	0.556098	0.588064	0.618548	0.638682	0.584863	0.653297	0.630653	0.632347	0.583863	0.617815	0.616763	0.674147	0.636946	0.677708	0.679354	0.675683	0.836099	0.916275	1.08658	1.20564	1.14272	1.15908	1.03893	1.07178	0.964993	1.05213	1.13398	1.13312	0.887965	0.93472	0.860784	0.798063	0.975827
0.729799	0.721325	0.781963	0.90691	0.790834	0.741862	0.710955	0.714943	0.734142	0.760533	0.777762	0.86434	0.831172	0.841847	0.933337	0.933944	0.950674	0.928936	0.994741	0.968939	0.919383	0.884364	0.929238	1.00559	1.00769	1.04133	1.0042	1.08009	0.969583	0.950205	1.04614	1.03677	1.11828	1.37904	1.52941	1.63936	1.6607	1.64311	1.68715	1.5582	1.61424	1.6136	1.66182	1.62602	1.7932	1.80504	1.64192	1.55182	1.58105	1.72108
0.684424	0.701087	0.818157	0.827592	0.779896	0.700599	0.826405	0.811952	0.901023	0.988527	1.01234	0.985655	0.895769	1.04106	1.10279	1.17575	1.23909	1.21496	1.15605	1.16495	1.09759	1.13778	1.16523	1.12543	1.1528	1.10438	1.03696	1.02323	0.991484	0.923603	0.943446	0.928465	0.905253	1.12982	1.28178	1.49047	1.61692	1.53307	1.39774	1.34147	1.39716	1.47169	1.53796	1.48898	1.43309	1.50677	1.57514	1.66065	1.56484	1.62783
1.37845	1.28815	1.2679	1.34431	1.25894	1.27954	1.32437	1.23709	1.22286	1.22669	1.20752	1.23593	1.28319	1.16012	1.17663	1.21983	1.1984	1.16884	1.07695	1.10328	1.01919	0.962737	0.984341	0.950557	0.961729	0.925694	0.921548	0.935892	0.955454	0.978604	1.0522	0.985267	0.975723	1.09146	1.05336	1.19828	1.21471	1.21807	1.27504	1.19672	1.08844	1.02006	1.1572	1.15118	1.06757	1.1146	1.09493	1.06567	1.06191	1.12441
0.842066	0.829621	0.894433	0.889189	0.931283	0.916388	0.897807	0.915096	0.850405	0.92652	0.858309	0.86925	0.83184	0.897562	0.967505	0.96204	0.991546	1.0164	0.995551	1.00528	1.00033	0.972207	1.00035	0.959991	1.02246	0.997406	1.053	1.05132	1.04376	1.12306	1.03919	1.03778	1.04343	1.04497	1.11008	1.11637	1.10352	1.14929	1.02841	1.0909	1.05634	1.02455	0.995682	1.03269	1.02397	1.02917	1.05179	0.992002	0.95947	0.992604
1.0045	1.16132	1.14087	1.0109	1.05593	0.994912	1.02976	1.0205	1.04838	1.02591	1.03563	1.05854	1.10697	1.04023	1.15731	1.17776	1.25948	1.21877	1.26865	1.28879	1.29432	1.27472	1.1762	1.24156	1.21312	1.24797	1.1547	1.26343	1.22949	1.22687	1.23231	1.24723	1.3296	1.3304	1.47859	1.56044	1.60429	1.5413	1.55849	1.57553	1.58165	1.60742	1.60525	1.42744	1.68082	1.77158	1.81574	1.72635	1.71715	1.83189
0.664558	0.683544	0.707624	0.791308	0.744789	0.73135	0.711687	0.696264	0.644519	0.675586	0.703487	0.767555	0.748633	0.726854	0.729872	0.749544	0.675058	0.683048	0.688695	0.663309	0.696402	0.685198	0.704071	0.696027	0.648201	0.651458	0.68103	0.650076	0.653851	0.70222	0.687189	0.660936	0.69429	0.672977	0.63237	0.663084	0.60413	0.627168	0.669805	0.61591	0.628711	0.637997	0.495706	0.305786	0.249838	0.249289	0.230799	0.226163	0.291688	0.463183
0.693476	0.703507	0.669741	0.710575	0.700733	0.694603	0.781393	0.716539	0.771039	0.808276	0.808279	0.787983	0.799751	0.834426	0.86368	0.822479	0.796126	0.781962	0.746273	0.731982	0.723794	0.701814	0.707788	0.725367	0.753863	0.712693	0.725145	0.692077	0.709585	0.717093	0.737997	0.721546	0.765659	0.83072	0.902934	0.976665	1.02298	1.12685	1.13487	1.27126	1.31011	1.14521	1.13128	1.22915	1.20856	1.29648	1.17632	1.24963	1.22564	1.17708
1.22265	1.23672	1.29298	1.30474	1.27285	1.28031	1.25933	1.26192	1.24411	1.17911	1.20622	1.12638	1.14009	1.09266	1.11336	1.04311	1.13523	1.11134	1.07034	1.15097	1.11764	1.08143	1.11527	1.13452	1.17227	1.2103	1.20438	1.19965	1.16466	1.23161	1.20811	1.16521	1.11013	1.28702	1.44373	1.71851	1.75516	1.59655	1.61878	2.02965	1.93675	1.99023	1.94712	2.01763	1.92929	1.79213	1.87384	2.01338	1.80508	1.91144
1.08077	1.00746	1.14359	1.19888	1.15547	1.16835	1.23214	1.21795	1.1983	1.15547	1.20486	1.24187	1.22055	1.24345	1.3359	1.47279	1.31674	1.46009	1.40098	1.27648	1.29106	1.20408	1.34056	1.21423	1.24209	1.19327	1.29048	1.25924	1.29337	1.26259	1.33846	1.32652	1.46313	1.8398	1.73766	1.79486	1.86424	1.92628	1.98841	2.07782	1.81596	1.8343	2.0982	1.96845	1.78829	2.04996	2.04777	1.95617	2.03308	1.85431
0.788838	0.615132	0.700746	0.763767	0.704307	0.71139	0.800503	0.866298	0.880928	0.893268	0.923391	0.915297	0.84128	0.86863	0.878504	0.893197	0.841943	0.834848	0.78013	0.756375	0.789838	0.813891	0.851659	0.854229	0.838536	0.850997	0.835076	0.866651	0.853325	0.865439	0.98953	1.0525	1.19531	1.47477	1.74066	1.74567	1.8406	1.81036	1.81692	1.69699	1.75919	1.70464	1.58893	1.70456	1.6037	1.48892	1.62619	1.70629	1.97724	1.91983
1.12815	1.11927	1.0447	1.02106	1.06268	1.01965	1.07057	1.09872	1.12616	1.14116	1.22778	1.2605	1.27782	1.23209	1.32094	1.32537	1.38593	1.31779	1.27192	1.22502	1.27912	1.25462	1.16999	1.12974	1.18743	1.17929	1.15053	1.12067	1.19204	1.26834	1.2446	1.25852	1.26861	1.49447	1.59957	1.67376	1.70956	1.60671	1.76917	1.57252	1.62968	1.76074	1.99303	2.27986	2.09807	2.39274	2.16757	2.05141	1.79082	1.4778
1.99282	1.71679	1.74753	1.77748	1.72752	1.73121	1.67663	1.69142	1.6668	1.68433	1.66313	1.61447	1.45056	1.33078	1.42912	1.31808	1.33284	1.30083	1.24706	1.23653	1.20411	1.13732	1.12852	1.02821	1.04433	0.9989	1.00735	1.08141	1.01618	0.997586	0.960526	0.933041	1.02889	1.20138	1.35123	1.52586	1.47498	1.56674	1.55126	1.61379	1.62927	1.55641	1.64028	1.7082	1.74115	1.61643	1.61029	1.69082	1.57346	1.65957
0.712696	0.695192	0.731793	0.726563	0.770044	0.727404	0.737009	0.785242	0.76127	0.76977	0.74397	0.751237	0.740613	0.749329	0.727781	0.741012	0.713428	0.738823	0.710877	0.71566	0.79488	0.758616	0.732473	0.647561	0.550883	0.531928	0.48322	0.656257	0.767066	0.717033	0.73351	0.727733	0.717852	0.823153	0.907221	0.908067	0.947207	1.00185	0.935502	1.01369	1.06797	1.08487	1.07744	1.08295	1.03818	1.08393	1.09433	1.15723	1.23811	1.29802
1.07494	0.983748	1.00394	1.02685	1.00204	1.08258	1.04242	1.03121	1.01294	1.00155	1.04803	1.0519	0.939991	0.96769	0.989804	0.970694	0.97557	0.977718	1.02646	0.983228	1.04176	1.02086	1.06636	1.07363	1.08531	1.01312	1.09023	1.05911	1.01435	1.04756	0.972873	0.973602	1.04102	1.14017	1.2461	1.38939	1.43589	1.46726	1.37083	1.43497	1.46072	1.3189	1.45423	1.59031	1.50877	1.63201	1.543	1.53641	1.60134	1.36636
0.721159	0.72047	0.69414	0.74321	0.786302	0.745645	0.697465	0.791336	0.820386	0.825328	0.786288	0.798939	0.866638	0.755899	0.811768	0.81189	0.825144	0.8428	0.90595	0.91777	0.853742	0.861912	0.928686	0.934131	0.886978	0.845433	0.787393	0.836378	0.849349	0.800343	0.856071	0.722999	0.868543	0.948026	0.988979	1.02527	1.06456	0.999498	1.03658	0.958251	0.900865	0.9034	0.967301	1.03801	1.05785	1.11697	1.21091	1.05581	1.15981	1.19489
1.00242	0.932396	1.01373	0.945857	0.940548	0.994086	0.99548	1.00768	1.03298	1.05368	1.09903	0.999815	1.04879	1.01641	1.05423	1.07488	1.0747	1.09502	1.12152	1.16968	1.09492	1.13149	1.2439	1.21919	1.22142	1.21671	1.17997	1.10875	1.14621	1.12258	1.04422	1.07632	1.10531	1.35114	1.49523	1.57754	1.55387	1.69382	1.69512	1.91748	1.82612	1.61993	1.82693	1.64194	1.69627	1.7001	1.72541	1.51886	1.48977	1.65358
0.795587	0.804944	0.822134	0.879573	0.838	0.809038	0.942209	0.96612	0.831222	0.898442	0.80664	0.896527	0.881473	0.845067	0.866872	0.818959	0.916767	0.896006	0.870628	0.905434	0.903076	0.920894	0.921133	0.852413	0.873167	0.892665	0.925836	0.932007	0.98689	1.0174	0.961312	0.958953	1.0638	1.19587	1.35975	1.38519	1.40003	1.49155	1.47569	1.48691	1.46825	1.41191	1.43005	1.45436	1.4397	1.48478	1.66948	1.59063	1.42542	1.50125
0.718561	0.706942	0.720636	0.778041	0.801927	0.819736	0.858587	0.929587	0.844732	0.872472	0.88612	0.886409	0.882349	0.858042	0.820893	0.806082	0.772854	0.761375	0.737173	0.776224	0.718186	0.739219	0.682749	0.674952	0.661999	0.668668	0.644901	0.639045	0.606278	0.622376	0.54939	0.504883	0.542254	0.655719	0.763689	0.990557	0.991168	0.944297	0.966499	1.05428	1.03776	1.10224	1.06605	1.12448	1.1983	1.18815	1.25065	1.32415	1.3187	1.44252
0.650247	0.622402	0.610962	0.640035	0.624893	0.626745	0.622696	0.634866	0.682754	0.637686	0.672728	0.660365	0.666973	0.65218	0.666771	0.642321	0.629486	0.585655	0.610728	0.646762	0.674127	0.684805	0.664636	0.702421	0.673558	0.702549	0.715526	0.673537	0.728772	0.731705	0.698362	0.679119	0.75567	0.874245	0.900201	0.981679	0.951018	0.929815	0.927246	0.914752	0.931849	0.979248	1.04938	1.06192	1.06801	1.15676	1.10261	1.13602	1.06506	1.14757
1.16668	1.23317	1.226	1.20182	1.28866	1.18638	1.23533	1.18212	1.17836	1.18807	1.18272	1.24391	1.30186	1.31851	1.268	1.29113	1.36107	1.35466	1.34892	1.34766	1.27816	1.32787	1.26551	1.2259	1.31961	1.30819	1.31708	1.32751	1.35788	1.33049	1.3376	1.39081	1.42497	1.84976	2.07168	2.16415	2.33864	2.27494	2.1341	2.27187	2.03893	2.01676	2.26191	1.93	1.94601	2.44888	2.15213	2.10864	1.94232	2.14332
1.40199	1.34828	1.32405	1.33008	1.27802	1.2261	1.25655	1.28165	1.17644	1.19504	1.23908	1.2359	1.25569	1.23942	1.33092	1.26302	1.30516	1.34206	1.34387	1.35232	1.33579	1.32886	1.39518	1.3619	1.30383	1.32079	1.27016	1.31082	1.29464	1.31255	1.30563	1.26079	1.353	1.53352	1.68567	1.84402	1.82502	1.88982	1.8447	1.82514	1.73942	1.84555	1.92984	1.99656	1.92379	1.97547	1.94637	1.9965	1.89802	1.98081
0.78712	0.682358	0.687904	0.721876	0.753414	0.764127	0.748595	0.798752	0.773608	0.7609	0.742605	0.749861	0.734653	0.696372	0.757283	0.711871	0.730848	0.697057	0.643698	0.627491	0.601259	0.597158	0.579065	0.554508	0.49719	0.492248	0.465141	0.421385	0.418949	0.442323	0.459413	0.446761	0.476296	0.519765	0.576607	0.691767	0.831303	0.949502	0.992292	0.986908	0.996003	0.903819	0.822533	0.983451	0.878927	0.902219	0.911606	0.874528	0.822624	0.729192
0.966275	0.920755	0.887465	0.877513	0.950533	1.00308	0.964319	0.946412	1.02359	0.996216	1.01131	1.01155	1.05972	1.02276	1.03471	1.05952	1.03664	0.945724	1.00052	0.990327	1.02603	1.00551	1.02641	1.03751	1.03587	0.968815	0.976761	1.04176	1.02584	0.991019	1.03105	0.989081	1.13606	1.36889	1.51713	1.5308	1.46637	1.58848	1.5523	1.69063	1.59667	1.58239	1.65462	1.66191	1.58206	1.5995	1.55028	1.40541	1.4464	1.40343
0.998207	0.901492	0.869814	0.893604	0.867983	0.954418	1.01649	0.953954	0.981407	0.980612	1.00831	1.06312	1.05481	1.00352	1.04146	0.992712	0.980273	0.983003	1.00989	0.964943	1.06064	1.05343	1.03341	1.03152	1.07091	0.99816	1.01899	1.0231	1.09493	0.986208	0.946423	0.982496	1.04924	1.32276	1.44817	1.49841	1.65516	1.6412	1.51982	1.51345	1.48065	1.39853	1.55286	1.51394	1.41821	1.47472	1.60812	1.65913	1.69334	1.81777
1.32679	1.14188	1.26684	1.1759	1.24645	1.30554	1.23811	1.21953	1.28065	1.25708	1.30613	1.19895	1.25819	1.26254	1.4117	1.26823	1.4738	1.50687	1.41247	1.44691	1.44718	1.49734	1.53845	1.40446	1.65782	1.47999	1.57773	1.51895	1.52031	1.457	1.48807	1.40924	1.43373	1.80783	1.87749	1.80421	1.83122	1.75956	1.80884	1.92556	1.87223	1.81422	1.9687	2.00599	2.00541	1.934	1.79568	1.8552	1.83119	1.70349
1.07672	1.06798	1.05322	1.09039	1.13745	1.14504	1.14253	1.13282	1.03763	1.10016	1.10134	1.12247	1.15878	1.22705	1.38792	1.40834	1.40271	1.38796	1.30505	1.36781	1.31224	1.24241	1.12868	1.1526	1.05414	1.11716	1.16582	1.22231	1.14655	1.15977	1.14122	1.17053	1.16762	1.5144	1.55048	1.69948	1.64324	1.61563	1.54703	1.49478	1.4667	1.44645	1.41612	1.5736	1.70116	1.56	1.72252	1.74808	1.56513	1.5798
1.54558	1.44404	1.44786	1.35591	1.38025	1.42056	1.39369	1.35683	1.33956	1.2539	1.28368	1.25685	1.22245	1.2432	1.27484	1.22459	1.18347	1.15715	1.22235	1.13036	1.09269	1.1315	1.10601	1.12328	1.00439	1.02444	1.04318	1.05566	1.04695	1.07132	1.06528	1.01981	1.0504	1.14927	1.18958	1.27679	1.29568	1.39087	1.31973	1.35997	1.38378	1.3167	1.37257	1.54386	1.49055	1.51559	1.47282	1.60276	1.49538	1.55386
0.775487	0.805957	0.806294	0.803031	0.813113	0.794552	0.821965	0.801729	0.755628	0.76796	0.73745	0.766373	0.775457	0.760117	0.856913	0.845674	0.759036	0.76784	0.800618	0.806425	0.833169	0.825691	0.830076	0.817661	0.875102	0.884554	0.851431	0.889035	0.898414	0.88685	0.879892	0.928575	1.00701	1.10477	1.21515	1.24791	1.29249	1.37442	1.34072	1.44964	1.38051	1.53124	1.58096	1.61508	1.55781	1.60922	1.66023	1.58602	1.53525	1.60204
0.883776	0.920506	0.951267	0.952531	0.933168	0.906746	0.9229	0.879463	0.914628	0.917234	0.912347	0.883248	0.905928	0.883863	0.934856	0.904898	0.92795	0.91086	0.856848	0.817334	0.7732	0.811532	0.823763	0.859686	0.8369	0.852208	0.833679	0.869158	0.906555	0.900574	0.860342	0.916023	0.932666	1.09827	1.37354	1.52299	1.65635	1.67493	1.81874	1.79544	1.84032	1.89716	1.88568	1.9709	1.94378	2.02983	1.95174	1.95672	2.10385	2.04403
0.562739	0.55341	0.59221	0.595048	0.568158	0.597846	0.578445	0.604452	0.612944	0.632448	0.59221	0.564869	0.563403	0.57157	0.604659	0.583674	0.566806	0.575527	0.593142	0.591374	0.547504	0.53074	0.553812	0.531104	0.546171	0.552714	0.51752	0.514289	0.484204	0.482282	0.46024	0.457429	0.472775	0.540361	0.583287	0.669961	0.760729	0.754651	0.732729	0.729992	0.73712	0.719647	0.752263	0.756501	0.855241	0.98405	0.988491	1.16546	1.09178	1.0771
1.32939	1.35009	1.32553	1.41044	1.43281	1.45856	1.48393	1.41135	1.35632	1.32726	1.51643	1.33509	1.32696	1.32734	1.35346	1.33659	1.29103	1.26175	1.34084	1.34831	1.35761	1.39492	1.37956	1.29069	1.37636	1.2354	1.20599	1.259	1.23425	1.26037	1.17847	1.11031	1.07466	1.26049	1.51719	1.66643	1.718	1.85113	1.86348	1.96338	1.92337	1.92839	1.8866	1.97126	1.82108	1.89595	1.71926	1.65401	1.56013	1.592
0.998875	1.01957	0.999738	0.993835	0.906519	0.984019	1.00492	0.995809	1.03999	0.9564	1.0365	0.977274	0.996128	0.952933	0.961195	0.964851	0.939444	0.921698	0.914431	0.961668	1.02544	1.055	1.11278	0.982256	0.987283	1.09896	1.10833	1.07808	1.10922	1.04191	1.07767	1.0383	1.07359	1.35534	1.59033	1.78778	1.82977	1.99421	1.7772	1.56008	1.78277	1.69563	1.86288	1.8885	2.01108	1.98464	2.04542	2.12858	1.90747	2.01145
0.653464	0.679296	0.737879	0.74235	0.712933	0.711038	0.744249	0.746428	0.741095	0.778086	0.770168	0.745499	0.729682	0.737008	0.728864	0.721091	0.675386	0.679292	0.664981	0.686124	0.694754	0.715642	0.677506	0.682742	0.736161	0.696863	0.701336	0.732832	0.711625	0.697485	0.697878	0.669456	0.731321	0.78611	1.00441	1.12326	1.05851	1.16525	1.28597	1.35626	1.41769	1.3014	1.22817	1.17311	1.1866	1.20787	1.2872	1.33793	1.36609	1.42638
0.717307	0.704155	0.701694	0.753591	0.841855	1.04242	1.00073	0.855585	0.83566	0.828999	0.80011	0.846134	0.810348	0.75675	0.832115	0.75823	0.811469	0.758815	0.721711	0.778614	0.775553	0.746103	0.755275	0.72536	0.682028	0.666101	0.655084	0.612039	0.59619	0.573501	0.631736	0.621387	0.697978	0.875849	1.05178	1.22265	1.23977	1.24741	1.34893	1.38909	1.19652	1.20228	1.15048	1.0721	1.12919	1.13887	1.23708	1.16358	1.25851	1.17915
0.929649	0.965065	0.938795	0.977661	1.00812	0.926802	1.04484	0.926602	0.926218	0.915468	0.885983	0.889429	0.911776	0.864728	0.952586	0.915503	0.805492	0.794537	0.776395	0.804153	0.844492	1.16763	1.21594	1.28116	1.34778	1.37343	1.39381	1.36707	1.37347	1.48143	1.4294	1.43556	1.57657	2.02539	1.99152	1.92961	1.82583	1.73954	1.40169	1.3869	1.36408	1.25631	1.18959	1.14835	1.15759	1.10326	1.07299	1.18886	1.22627	1.22018
0.652925	0.668765	0.694054	0.668012	0.702494	0.718136	0.715514	0.738759	0.735211	0.7742	0.770621	0.745637	0.772491	0.700199	0.732277	0.703354	0.680983	0.680042	0.638396	0.651916	0.678094	0.693826	0.671	0.643945	0.630768	0.656346	0.623253	0.649597	0.649872	0.652168	0.657165	0.675914	0.717209	0.851183	1.02567	1.1344	1.22432	1.28037	1.27783	1.25657	1.25576	1.29228	1.40557	1.46585	1.44916	1.54262	1.49784	1.55295	1.46437	1.45568
1.49152	1.41772	1.47798	1.51389	1.509	1.36418	1.19102	1.16139	1.21585	1.24017	1.1969	1.18614	1.17437	1.21061	1.11061	1.13272	1.07592	1.04464	1.00866	1.02636	1.01715	0.990089	0.97685	0.914454	0.885869	0.883902	0.911469	0.879403	0.85432	0.834685	0.840644	0.87903	0.897231	1.07376	1.21318	1.28574	1.37374	1.36143	1.2743	1.31058	1.25085	1.22707	1.33168	1.2497	1.20829	1.24865	1.2017	1.25392	1.19596	1.18049
0.726462	0.686595	0.639605	0.633667	0.58992	0.54768	0.521905	0.513816	0.491828	0.507831	0.482723	0.491297	0.50011	0.490182	0.510819	0.486621	0.475145	0.469152	0.483103	0.475075	0.468535	0.490422	0.476816	0.442779	0.451611	0.434658	0.446229	0.432707	0.430811	0.451525	0.474466	0.484675	0.538577	0.707365	0.833129	0.93288	0.970938	1.07959	1.16179	1.20399	1.29506	1.27218	1.29114	1.33752	1.3678	1.39813	1.40408	1.57196	1.51327	1.45516
2.01698	1.84896	1.87147	1.80775	1.92789	1.81952	2.07966	1.84484	1.89341	1.90237	1.9498	1.98209	1.89927	1.87259	1.87237	1.81705	1.8307	1.76465	1.88595	1.74038	1.81545	1.76211	1.73881	1.73606	1.74903	1.68569	1.71409	1.64114	1.7933	1.68947	1.60098	1.6212	1.80747	1.92452	2.21823	2.18605	2.39199	2.45572	2.17594	2.25096	2.09951	2.04731	2.42705	2.47551	2.28406	2.3035	2.31515	2.11321	2.30689	2.32267
1.12866	1.06584	1.15585	1.18307	1.13238	1.16443	1.13853	1.07047	1.18207	1.06263	1.04675	1.12013	1.12164	1.21298	1.18555	1.23968	1.2381	1.19674	1.14577	1.2527	1.10376	1.18256	1.13773	1.20442	1.21355	1.17933	1.30596	1.30903	1.28901	1.24155	1.30373	1.24201	1.26525	1.7034	1.92403	2.08899	2.10088	2.07659	2.25643	2.36538	2.01893	2.28213	2.22513	2.08761	2.03822	2.20817	2.24623	2.11394	1.89735	2.01065
1.28218	1.18987	1.07466	1.0077	1.07955	1.06598	1.1762	1.10276	1.12752	1.09241	1.07424	1.04757	1.0196	1.0096	1.0546	1.05867	1.02126	1.09022	1.08826	1.08822	1.04163	1.04516	1.0378	1.03349	1.05417	1.02659	1.11693	1.10947	1.0703	1.09493	1.07229	0.998543	1.01882	1.10042	1.19973	1.27516	1.21259	1.33462	1.26666	1.34286	1.26477	1.30268	1.37862	1.31978	1.35647	1.3994	1.43685	1.47245	1.48317	1.55788
1.58488	1.52955	1.49469	1.39485	1.22398	1.24198	1.24087	1.09164	1.15628	1.07015	1.16088	1.19428	1.13616	1.05791	1.08296	1.00221	1.03158	1.04485	0.994587	1.01007	1.01757	1.0198	0.939947	0.922046	0.895433	0.883697	0.870226	0.853804	0.787719	0.825086	0.821154	0.792341	0.871083	1.06015	1.28061	1.44156	1.70265	1.93862	1.93782	2.03118	1.93776	1.84036	1.95195	2.04552	1.93553	1.70074	2.01686	1.59343	2.27268	2.11305
1.29757	1.23038	1.17061	1.183	1.14669	1.13328	1.08777	1.0944	1.07717	0.979845	0.996773	1.02587	0.990033	0.974982	1.00621	0.993584	1.03124	1.00485	1.01572	1.02296	1.03215	1.01246	1.01303	0.959605	0.977655	1.00242	0.926205	0.89359	0.887052	0.848451	0.884329	0.850725	0.878211	1.03301	1.10457	1.21092	1.36928	1.46846	1.43418	1.46772	1.5539	1.56756	1.54402	1.55568	1.58356	1.54229	1.55406	1.6262	1.50521	1.55614
0.953582	0.904016	0.935687	0.889021	0.818274	0.903173	0.925335	0.949734	0.954022	0.957463	0.960499	0.974175	0.939283	0.99645	1.00051	0.996729	0.875643	0.972321	0.923658	0.928752	0.967642	0.997635	1.02507	0.999527	0.969396	0.945321	0.955442	0.93252	0.94976	0.935981	0.925067	0.917217	0.93067	1.15156	1.35286	1.51849	1.64435	1.69757	1.80833	1.88188	1.84773	1.99393	1.94298	2.03878	1.9715	1.97195	1.97254	1.87318	1.74435	1.7699
1.07852	1.11855	1.11487	1.11217	1.09277	1.17581	1.05593	1.03259	1.0393	0.987207	0.920233	0.961058	0.908042	1.0355	1.03946	0.998743	1.07149	1.06975	1.00817	1.05907	1.08422	1.1304	1.15514	1.10956	1.07252	1.10371	1.06886	1.10225	1.1005	1.07921	1.04168	1.03081	1.07468	1.34863	1.39903	1.56729	1.60601	1.65454	1.62444	1.61389	1.30291	1.30273	1.60507	1.62351	1.63674	1.64067	1.57621	1.77234	1.67279	1.86876
1.73167	1.76006	1.73738	1.90312	1.91	1.8394	2.27846	1.68804	1.64069	1.35415	1.44492	1.48082	1.47422	1.46234	1.34043	1.39755	1.48059	1.41892	1.50124	1.47293	1.5367	1.56688	1.41867	1.4162	1.33208	1.37192	1.30032	1.66202	1.79994	1.60776	1.56103	1.55448	1.65844	1.73046	1.53631	1.48497	1.59406	1.37163	1.58038	1.43462	1.56595	1.43079	1.31045	1.6678	1.75989	1.9039	1.8188	2.1329	1.8486	1.78013
0.775043	0.782788	0.810071	0.777969	0.778833	0.775259	0.766546	0.761397	0.784703	0.799205	0.792274	0.758184	0.803712	0.781689	0.778789	0.764812	0.790466	0.77559	0.737544	0.730276	0.717825	0.714236	0.724657	0.695151	0.731845	0.719912	0.717131	0.734119	0.699257	0.692953	0.675225	0.713531	0.723695	0.87509	1.07375	1.11161	1.20459	1.22891	1.20718	1.23033	1.09924	1.20331	1.43761	1.44042	1.29662	1.33321	1.25756	1.3395	1.2896	1.3474
0.848815	0.817052	0.817954	0.838759	0.81101	0.792087	0.77297	0.781328	0.795913	0.784429	0.773641	0.759498	0.762625	0.760386	0.795582	0.775972	0.787476	0.771867	0.781983	0.745297	0.735461	0.75684	0.720419	0.755791	0.742781	0.757133	0.729233	0.762011	0.765084	0.770603	0.750227	0.779085	0.761465	0.888016	0.979676	1.11588	1.20304	1.38397	1.50291	1.53826	1.56829	1.65202	1.73598	1.75089	1.68204	1.67478	1.68627	1.6125	1.62183	1.58227
1.23594	1.11477	1.1621	1.08364	1.11394	1.12675	1.0884	1.0353	1.00545	0.992031	0.908438	0.951822	0.888821	0.903417	0.888995	0.889768	0.887399	0.921537	0.889891	0.922605	0.939683	0.918196	0.916707	0.9171	0.938282	0.879756	0.878476	0.82887	0.863897	0.90084	0.836912	0.868535	0.897744	1.18637	1.33627	1.56821	1.47311	1.56371	1.56411	1.69356	1.82817	1.76526	1.81031	1.68183	1.6559	1.63049	1.70108	1.55892	1.6073	1.62142
0.329691	0.335814	0.326701	0.290866	0.259168	0.275579	0.27761	0.27389	0.290203	0.283984	0.301877	0.300496	0.29582	0.292509	0.303016	0.282027	0.282833	0.28455	0.311408	0.365105	0.386069	0.395529	0.409883	0.406215	0.455407	0.442518	0.44103	0.49094	0.451832	0.475586	0.42955	0.4354	0.52265	0.708065	0.880083	0.96666	1.03355	1.02193	1.05697	0.974453	1.07711	1.06935	1.14546	1.12666	1.12624	1.1783	1.072	1.0823	1.0702	1.06225
1.32919	1.31354	1.35326	1.27107	1.2381	1.20564	1.16064	1.11793	1.14749	1.11132	1.08553	1.08105	1.08384	1.05614	1.04551	1.02704	0.985074	0.972834	0.96927	0.949653	0.943398	0.91116	0.906759	0.896208	0.852232	0.888054	0.860098	0.858427	0.868723	0.867956	0.857327	0.876717	0.899855	1.10019	1.2649	1.41563	1.51937	1.55768	1.63331	1.63331	1.73505	1.75575	1.73158	1.75379	1.77459	1.79192	1.80287	1.76079	1.76153	1.71941
0.696282	0.731232	0.720136	0.698467	0.718914	0.784832	0.783641	0.765597	0.722575	0.706863	0.667263	0.727277	0.703715	0.7165	0.731122	0.686777	0.700271	0.829719	0.797811	0.745887	0.668109	0.860969	0.790027	0.825777	0.778627	0.685689	0.60255	0.562417	0.578081	0.568842	0.656515	0.675759	0.780721	0.836481	0.721503	0.754255	0.716122	0.617688	0.65484	0.665829	0.728229	0.758107	0.776334	0.745463	0.727548	0.662941	0.624168	0.693137	0.69459	0.745185
1.15852	1.1525	1.07278	1.07713	1.03989	0.955669	0.941542	0.886053	0.896581	0.903696	0.894954	0.913576	0.908229	0.878149	0.879617	0.82973	0.791442	0.8008	0.805783	0.823475	0.812079	0.748981	0.745327	0.707745	0.723308	0.678444	0.64555	0.646109	0.64782	0.653511	0.656478	0.628905	0.673713	0.735197	0.779807	0.81062	0.790543	0.752808	0.770641	0.739938	0.732418	0.740778	0.766028	0.762599	0.734882	0.726957	0.736294	0.767561	0.840584	0.855361
1.02419	1.00906	0.990472	0.960894	0.94796	0.975859	0.97037	0.975989	1.01737	0.994498	0.991182	0.995347	0.973637	0.928244	0.926409	0.906892	0.912963	0.952741	0.898696	0.93547	0.900943	0.8944	0.865109	0.802626	0.826895	0.850154	0.882563	0.84546	0.873958	0.872567	0.846451	0.819934	0.897133	1.09638	1.24004	1.3039	1.38579	1.48224	1.46852	1.49657	1.46102	1.48581	1.42307	1.38839	1.4603	1.40907	1.37925	1.30327	1.37622	1.29902
1.2733	1.28494	1.23924	1.21934	1.19759	1.16872	1.25702	1.24997	1.27532	1.2717	1.22469	1.24156	1.21685	1.22586	1.2497	1.24094	1.28429	1.32206	1.28113	1.29557	1.30862	1.35014	1.39637	1.34701	1.37723	1.45771	1.38207	1.48221	1.44976	1.52818	1.43496	1.46863	1.15315	1.48731	1.59289	1.5119	1.76845	1.98515	1.88108	2.16673	1.98397	1.69539	1.68434	1.78248	1.81214	2.0733	2.04102	2.02844	2.06784	2.20647
1.07906	1.04202	1.03889	1.10118	1.00706	1.16903	1.04398	0.983315	0.940693	0.967238	0.93858	0.828349	0.743741	0.785327	0.776901	0.788273	0.856286	0.886231	0.944224	1.02666	1.02902	0.944395	0.907027	0.864044	0.87925	0.8853	0.890922	0.868726	0.848463	0.818385	0.712169	0.678714	0.700286	0.860877	0.836996	1.00363	1.19306	1.30403	1.25125	1.29494	1.27774	1.35985	1.44871	1.55645	1.60792	1.76041	1.83896	2.12098	2.11956	1.94989
0.836575	0.847586	0.948486	0.974822	0.855571	0.903324	0.916875	0.911199	0.880741	0.848423	0.977065	0.927614	0.867791	0.88784	0.884187	0.83864	0.801166	0.815598	0.790881	0.781696	0.791724	0.776528	0.779341	0.773477	0.812207	0.753143	0.742895	0.712421	0.744583	0.722332	0.744277	0.768263	0.798502	1.04766	1.17528	1.29077	1.40141	1.39096	1.45131	1.52984	1.64904	1.67939	1.75987	1.84852	0.426312	0.351646	0.331969	0.322976	0.313238	0.268624
0.961418	0.944627	0.944291	0.918189	0.961502	0.958656	0.960403	0.93898	0.9104	0.955539	0.94017	0.982572	0.96257	0.957213	0.942576	0.910833	0.839115	0.91007	0.91524	0.872946	0.941966	0.881163	0.831665	0.901302	0.884847	0.936232	0.940184	0.89763	0.924325	0.860953	0.850668	0.914997	1.04905	1.14512	1.17164	1.14088	1.19673	1.22111	1.24549	1.28962	1.26635	1.16612	1.1296	1.18688	1.1763	1.18271	1.16542	1.25296	1.23342	1.3005
0.817244	0.941926	0.981894	0.394328	0.217629	0.182129	0.168357	0.224049	0.358124	0.492199	0.479163	0.539348	0.740438	0.946326	0.914549	0.845917	0.840364	0.859201	0.837976	0.818012	0.79316	0.747764	0.738588	0.766216	0.753062	0.718757	0.708319	0.723609	0.753856	0.734843	0.763566	0.795085	0.878986	1.16892	1.3218	1.25661	1.41228	1.43366	1.4907	1.49565	1.31587	1.22738	1.17799	1.15186	1.26569	1.23402	1.22815	1.20959	1.4109	1.21241
0.253211	0.196888	0.166485	0.152457	0.139793	0.146637	0.156828	0.234225	0.589536	0.944847	1.26385	1.34923	1.22877	1.17538	1.01763	0.992707	0.9082	0.903116	0.933099	0.888588	0.935737	0.905252	0.882429	0.852859	0.839956	0.897319	0.905171	0.874711	0.900626	0.890404	0.866266	0.881087	0.936313	1.17763	1.27994	1.45544	1.58906	1.71548	1.7009	1.67228	1.77205	1.66257	1.80751	1.87327	1.78353	1.91233	1.8773	1.91606	1.81403	1.81618
1.1548	1.0736	1.11922	0.973286	1.01732	0.943423	0.869524	0.91597	0.962416	0.786334	0.823783	0.802115	0.874268	0.843336	0.846103	0.829122	0.845989	0.862396	0.842772	0.897833	0.919549	0.887551	0.922201	0.934441	0.932536	0.860334	0.906386	0.833073	0.821823	0.810052	0.801506	0.802025	0.886689	0.874397	0.9304	0.957973	1.021	1.08557	1.07345	1.10536	1.03133	1.02921	1.15224	1.16833	1.13236	1.0735	1.18125	1.08112	1.10406	1.06595
0.99714	0.996971	0.971968	0.98339	0.983854	0.944371	0.949952	0.933326	0.926673	0.891844	0.901318	0.915733	0.915029	0.882167	0.911696	0.889898	0.900464	0.881005	0.909488	0.962186	0.953682	0.91205	0.901191	0.894705	0.918353	0.945054	0.989192	1.03754	1.06969	1.14619	1.10587	1.15548	1.12018	1.39309	1.45917	1.28104	1.71752	1.70667	1.72022	1.65293	1.81724	1.71897	1.9712	2.09591	1.96367	2.04105	2.0761	2.1512	2.13851	2.24519
0.943783	0.89269	0.872593	0.845922	0.833876	0.872893	0.899392	0.809307	0.874266	0.859529	0.81547	0.817289	0.788103	0.774344	0.796022	0.755766	0.742371	0.759018	0.723665	0.747076	0.743347	0.745226	0.723332	0.735153	0.702936	0.7077	0.688367	0.698911	0.68794	0.708072	0.666204	0.657321	0.76029	0.987708	1.07256	1.19341	1.18709	1.35111	1.12828	1.20052	1.14981	1.16662	1.15159	1.22642	1.20587	1.19421	1.14546	1.14341	1.15724	1.09543
1.28463	1.28111	1.23036	1.18777	1.14672	1.13888	1.02	1.13734	1.38793	1.19793	1.22784	0.96292	0.923987	0.879691	0.905321	0.93978	0.920431	0.893	0.909171	0.929927	1.31532	1.36516	1.0881	1.04974	1.05684	1.04875	1.46044	1.17237	1.11784	1.01984	0.602388	0.819592	0.954934	1.28428	1.61945	1.64363	1.71843	1.91439	1.76374	1.69731	1.81958	1.82007	1.91342	1.97595	1.78678	1.63752	1.7783	1.16533	0.993333	1.00477
0.667174	0.726493	0.761421	0.786436	0.741562	0.787598	0.768717	0.793598	0.811883	0.798299	0.77626	0.755936	0.705957	0.741644	0.771346	0.83307	0.865778	0.876467	0.865829	0.838678	0.784154	0.776297	0.75898	0.725893	0.782033	0.744127	0.737013	0.721347	0.728208	0.753038	0.744688	0.703188	0.781405	0.971603	1.1837	1.30807	1.33554	1.42012	1.33794	1.54894	1.36779	1.32628	1.33263	1.31087	1.45897	1.45299	1.36447	1.35952	1.30679	1.41927
1.05407	1.03557	1.12687	1.17012	1.11533	0.974319	0.987504	0.909488	0.934258	0.95552	0.95074	0.997369	0.985342	1.00478	0.872747	0.880292	0.862883	0.899644	0.943236	0.990087	1.00925	1.02347	0.991687	1.0126	0.962911	0.962883	0.943696	0.846054	0.907321	0.931864	0.931084	0.905549	0.866217	1.11741	1.31132	1.51739	1.50405	1.55874	1.40877	1.66886	1.71042	1.6567	1.62622	1.69425	1.54204	1.50892	1.45746	1.47711	1.5578	1.56041
1.11129	1.02781	1.0965	1.07179	1.10656	1.12503	1.16059	1.06098	1.06772	1.12207	1.07569	1.10187	1.11858	1.07927	1.1432	1.14338	1.20252	1.15284	1.08696	1.13849	1.12147	1.20928	1.17034	1.20892	1.22617	1.19762	1.19718	1.25855	1.21184	1.27214	1.15153	1.18292	1.26762	1.5092	1.76855	1.79085	1.76251	1.79725	1.87982	1.98613	1.79123	1.85597	1.88317	2.02097	1.79232	1.68268	1.81896	1.8828	1.7671	1.83184
0.923989	0.873247	0.953704	0.928255	0.925019	0.944393	1.00506	0.941381	0.925586	0.893356	0.900292	0.835196	0.887231	0.90651	0.851274	0.811099	0.764718	0.749664	0.781156	0.807998	0.823797	0.871723	0.8583	0.87973	0.911705	0.870149	0.86161	0.885724	0.890456	0.903704	0.916462	0.860688	0.968785	1.04373	1.01939	1.16219	1.17662	1.12227	1.07774	1.07925	1.04859	1.12917	1.12086	1.19061	1.16106	1.25621	1.18218	1.18565	1.1877	1.13292
1.08524	1.07461	1.0105	1.02413	0.988135	0.967008	0.973706	0.929788	0.874601	0.917755	0.949968	0.952717	0.953034	0.98289	0.990408	0.950447	0.929889	0.922652	0.906411	0.959765	1.05749	1.0547	1.08396	1.07589	1.01697	0.946102	0.948524	0.937221	0.904227	1.07043	1.16129	1.18966	1.21325	1.34756	1.34553	1.52644	1.61462	1.67042	1.73069	1.77098	1.89715	1.93481	1.87255	1.91192	1.86492	1.88638	1.83103	1.7969	1.58232	1.24419
0.813035	0.848978	0.883543	0.817127	0.735872	0.775033	0.979854	0.932305	1.10794	0.974359	0.922134	1.05159	0.868165	1.06462	1.05906	1.09754	1.16444	1.18823	1.19662	1.22206	1.24535	1.21207	1.24798	1.18616	1.28146	1.08313	1.08445	0.99561	1.08882	1.26565	1.3436	1.35116	1.35201	1.34698	1.56717	1.58083	1.39647	1.48207	1.51969	1.61796	1.61755	1.72199	1.76344	2.33277	2.31219	2.9563	2.63742	2.56348	2.56518	2.66733
0.218658	0.200866	0.206028	0.223102	0.236624	0.243527	0.258895	0.356896	0.722057	1.08722	1.28289	1.28111	1.32711	1.32492	1.37369	1.34137	1.35901	1.3428	1.36342	1.33762	1.25227	1.24577	1.27137	1.37162	1.29971	1.22693	1.20459	1.29939	1.26342	1.31827	1.31549	1.31901	1.31089	1.53405	1.73181	1.68252	1.89737	2.04234	2.16464	1.99351	1.78502	1.73572	2.08575	1.70087	1.8381	1.95449	2.03922	1.99186	1.95158	2.07049
1.04959	1.05732	1.09441	1.06394	1.13484	1.1047	1.11882	1.08972	1.07722	1.06094	1.08856	1.07792	1.0079	1.04356	1.0678	0.962544	0.917045	0.924035	0.916547	0.951736	1.00452	1.05498	1.05894	1.09305	1.06805	1.02949	1.0243	0.978611	0.977873	0.972596	1.01976	1.02518	1.14836	1.4288	1.7153	1.86443	1.35792	1.51955	1.42565	1.48656	1.74045	1.78643	1.39621	1.30354	1.46131	1.31078	1.53027	1.56608	1.6441	1.80222
0.924874	0.889195	0.915783	0.916942	0.949881	0.966569	0.87133	0.913583	0.901512	0.941251	0.930046	0.947119	0.887652	0.845794	0.856452	0.810537	0.782978	0.764132	0.749329	0.764815	0.765593	0.747654	0.753819	0.77476	0.765426	0.769473	0.819855	0.86114	0.856117	0.905667	0.936765	0.922318	0.9563	0.956977	0.998309	0.995164	1.04291	1.01596	0.989449	1.05513	0.9984	0.940854	0.930456	1.0253	1.01966	1.1059	1.1637	1.16196	1.20867	1.18642
0.503019	0.695138	0.663619	0.698586	0.588898	0.666566	0.746088	0.733724	0.671105	0.701221	0.742714	0.602704	0.577374	0.585322	0.532903	0.633751	0.648044	0.622985	0.600339	0.5836	0.596971	0.632493	0.636945	0.593545	0.613743	0.607079	0.649666	0.678479	0.717733	0.727755	0.685663	0.660552	0.688702	0.893763	0.939058	1.08653	1.0098	1.00341	1.06518	1.26285	1.23802	1.42757	1.37746	1.31076	1.40278	1.35018	1.35539	1.38552	1.33236	1.24178
0.732481	0.716593	0.787903	0.741793	0.76411	0.780283	0.786635	0.807832	0.756893	0.825007	0.787881	0.683451	0.707727	0.692223	0.750996	0.750124	0.757816	0.732032	0.718462	0.737389	0.743524	0.759861	0.759833	0.677986	0.706322	0.662588	0.70504	0.680394	0.68891	0.764827	0.71737	0.744216	0.795027	0.897719	1.06625	1.19821	1.14039	1.11791	1.20388	1.2339	1.10666	1.04998	1.14967	1.12506	1.09029	1.09054	1.0385	1.0236	1.09237	1.02978
1.35587	1.20988	1.19477	1.14131	1.19576	1.19165	1.2294	1.12028	1.13211	1.19396	1.17299	1.15686	1.16423	1.09596	1.10173	1.16451	1.05614	1.14881	1.04857	1.08057	1.12451	1.26783	1.1933	1.14873	1.24942	1.14219	1.14717	1.19714	1.13495	1.14504	1.16839	1.09862	1.22578	1.45469	1.61101	1.72387	1.71266	1.78797	1.88422	1.85553	1.84845	1.65899	1.9026	1.98768	1.84028	2.01219	1.7194	1.80878	1.62769	1.76404
1.13321	1.09123	1.25823	1.53253	1.50298	1.46933	1.08881	1.04106	1.08831	1.10522	1.19299	1.16614	1.09831	0.952913	0.862826	0.941151	0.9973	0.953729	0.942064	0.903751	0.824699	0.793556	0.71916	0.755779	0.733789	0.684353	0.698619	0.707138	1.13509	0.569772	0.575774	0.547258	0.611058	0.706102	0.722037	0.768029	0.728254	0.781993	0.765033	0.692306	0.690352	0.762296	0.810929	0.833171	0.792382	0.866018	0.828492	0.845907	0.862858	0.885034
0.878681	0.865802	0.857206	0.871203	0.881321	0.85511	0.825949	0.855056	0.821219	0.809036	0.754606	0.741274	0.702421	0.726528	0.73787	0.73464	0.722012	0.786038	0.772879	0.767882	0.761515	0.808631	0.787353	0.737159	0.700499	0.723493	0.776399	0.736096	0.731593	0.713624	0.708725	0.647652	0.740223	0.92261	1.07272	1.21195	1.27604	1.36505	1.5462	1.51193	1.70884	1.74579	1.76942	1.81806	1.86804	1.88106	1.92694	1.93753	1.80779	1.84879
0.702862	0.658826	0.599121	0.647715	0.61553	0.55135	0.615919	0.652506	0.663759	0.747582	0.744811	0.682201	0.747263	0.765021	0.726415	0.668376	0.624396	0.659618	0.656568	0.675069	0.719951	0.687289	0.723232	0.706582	0.710331	0.643682	0.641008	0.612269	0.616308	0.605012	0.591458	0.585962	0.613903	0.701762	0.787435	0.821384	0.87671	0.963243	0.855639	0.866566	0.888954	0.941075	0.934876	0.939022	0.986731	0.989276	0.915463	0.90096	1.0342	1.00232
0.592962	0.64313	0.664575	0.686864	0.712664	0.774751	0.900031	0.918262	0.781136	0.697112	0.654524	0.652764	0.604928	0.669927	0.749224	0.716467	0.748277	0.775973	0.83882	0.871779	0.79898	0.735903	0.6985	0.685039	0.707757	0.647761	0.68947	0.67568	0.67803	0.688043	0.661434	0.683792	0.739444	0.818045	0.970659	1.13332	1.2848	1.34716	1.49809	1.5935	1.58667	1.71737	1.76009	1.80488	1.79811	1.77402	1.85044	1.79402	1.67965	1.63352
1.0071	1.00521	1.0514	1.064	1.10012	1.0884	1.10353	1.06931	1.03499	1.00266	0.917684	0.898258	1.0192	1.06309	1.19904	1.17087	1.07576	1.01775	0.927981	0.976527	1.00203	0.945592	0.9331	0.923705	0.856642	0.90458	0.916519	0.905318	0.930805	0.800074	0.771789	0.862332	0.936739	1.33506	1.46778	1.46741	1.51199	1.58711	1.50918	1.42034	1.25509	0.972814	0.977613	1.14707	1.18822	1.33737	1.16526	1.16495	1.21401	1.26994
1.10798	1.13096	1.10785	1.08284	1.11304	1.13078	1.11436	1.13474	1.11691	1.13166	1.08377	1.07596	1.02578	1.01646	1.05148	1.1021	1.10409	1.08878	1.09966	1.04429	1.04034	1.12247	1.07146	1.06477	1.12801	1.13489	1.0702	1.1199	1.05549	1.03498	1.06304	1.05675	1.08909	1.42903	1.5862	1.74841	1.88844	2.06315	2.12005	2.09301	2.25416	2.1851	2.3124	2.3932	2.33084	2.35416	2.41478	2.21799	2.13612	2.2667
1.56021	1.56114	1.49905	1.50846	1.42708	1.46476	1.52722	1.49618	1.44972	1.33233	1.33281	1.29968	1.28712	1.27181	1.24335	1.16857	1.12037	1.10071	1.15657	1.09445	1.07808	1.15703	1.11415	1.10045	1.07081	1.06261	1.04432	1.06584	1.08403	1.07657	1.04545	1.10234	1.11123	1.31876	1.40953	1.46419	1.72679	1.69878	1.61365	1.57215	1.51143	1.36788	1.46154	1.45178	1.3085	1.34244	1.40236	1.42392	1.53856	1.55755
1.69976	1.52168	1.51641	1.39223	1.4042	1.34021	1.47786	1.45504	1.33493	1.40334	1.45374	1.40764	1.42442	1.39829	1.45814	1.51368	1.36307	1.49317	1.52437	1.47379	1.4661	1.47765	1.46398	1.29681	1.49416	1.40235	1.44674	1.24824	1.26326	1.27439	1.24657	1.38199	1.26369	1.33219	1.55042	1.71293	1.78766	1.92123	1.76168	1.66782	1.74365	1.76572	1.73481	1.56736	1.68605	1.78681	1.8423	1.67198	1.65492	1.7419
0.855768	0.855288	0.892278	0.940532	0.97586	0.956718	0.979795	0.892144	0.984825	0.958978	0.937755	0.884884	0.888593	0.780212	0.87014	0.775295	0.779288	0.815718	0.845612	0.84188	0.791484	0.804702	0.821203	0.814836	0.875959	0.803699	0.831452	0.779537	0.746827	0.859758	0.819402	0.830537	0.944864	1.22346	1.47388	1.58044	1.60555	1.61265	1.47238	1.42392	1.5522	1.63997	1.49232	1.60977	1.44742	1.46156	1.39333	1.38044	1.40819	1.61674
0.26028	0.127561	0.246235	0.2619	0.314816	0.239295	0.218627	0.939239	0.882771	0.768169	0.831362	0.744907	0.649837	0.752355	0.765512	0.804037	0.93094	1.09182	1.03486	1.02179	0.949042	0.896569	0.917318	0.863271	0.823236	0.8018	0.8164	0.848842	0.809594	0.888399	0.851466	0.826736	0.887092	0.975324	1.01756	1.22927	1.13126	1.2109	1.2168	1.18254	1.27734	1.26792	1.38926	1.4699	1.40707	1.4176	1.2946	1.37559	1.28615	1.40782
0.568757	0.551609	0.555011	0.550736	0.540056	0.529271	0.530902	0.523088	0.518549	0.518128	0.52127	0.491842	0.503003	0.505842	0.499629	0.484727	0.475165	0.557404	0.785751	0.449453	0.358677	0.349419	0.364605	0.456189	0.524511	0.592833	0.743807	0.872219	0.924414	0.808668	0.699167	0.659252	0.694663	0.848457	0.945927	1.00121	1.05946	0.998215	1.04933	0.977312	1.15189	1.12369	0.993084	1.02808	0.991942	0.911584	0.979778	0.977278	1.03296	1.09024
1.08385	1.02884	1.06383	1.0458	1.10421	1.01177	1.05059	1.00015	0.981519	0.983734	0.939235	0.880112	0.848531	0.808616	0.775368	0.748602	0.695317	0.736194	0.739996	0.753496	0.740313	0.701887	0.716818	0.679639	0.660491	0.645261	0.648911	0.657795	0.640199	0.632156	0.604609	0.599423	0.64074	0.790196	0.883311	0.972301	1.07587	1.17926	1.14138	1.23013	1.1994	1.27693	1.25597	1.33157	1.36726	1.34707	1.43629	1.45564	1.3487	1.36254
2.07199	1.38371	1.70574	0.984772	1.07251	1.31983	1.22698	1.00717	1.25374	1.2576	1.15043	1.18438	1.1766	1.11783	1.10645	1.0353	1.03817	1.00952	0.924878	0.904596	0.923205	0.92692	0.907005	1.02444	0.89871	0.912068	0.899514	0.98327	0.987829	1.02388	0.97855	0.916744	0.953296	1.11379	1.17602	1.25641	1.12321	1.3607	1.33392	1.32071	1.26968	1.25615	1.09316	1.2157	1.01586	1.21551	1.18355	1.20786	1.20173	1.21527
1.14815	1.10091	1.22024	1.20604	1.307	1.30164	1.28985	1.33025	1.23081	1.3347	1.29906	1.28436	1.31781	1.31073	1.22188	1.30438	1.27883	1.23748	1.18626	1.20876	1.15682	1.1604	1.16904	1.18189	1.24966	1.23037	1.26755	1.33191	1.26998	1.29437	1.35539	1.3597	1.36176	1.56344	1.69745	1.88829	2.01068	1.67516	1.80481	1.97655	2.00085	1.97798	1.95604	1.78509	1.57955	1.73892	2.00427	1.8621	1.78825	1.87151
0.946032	0.965913	0.985682	1.00246	1.00293	0.959459	0.90866	0.885339	0.866798	0.882534	0.887908	0.878857	0.820834	0.795105	0.787648	0.827841	0.811663	0.836517	0.798795	0.834772	0.830307	0.835714	0.871129	0.855861	0.860579	0.785265	0.792699	0.76972	0.734612	0.724066	0.720417	0.711833	0.749598	0.906661	0.938186	0.988998	1.00867	1.00171	1.01515	1.04204	1.10627	1.13759	1.16359	1.20992	1.22811	1.22373	1.36837	1.45816	1.37184	1.42516
1.87705	1.95208	1.81684	1.71538	1.72367	1.94003	2.27297	2.0825	1.96769	2.09962	2.21149	2.18147	1.98517	2.06195	2.02234	2.19017	1.97132	2.33184	2.23148	2.2446	2.08999	2.12443	2.12568	2.27596	2.25199	2.42265	2.38082	2.11023	2.33026	2.29568	2.14242	2.3178	2.09825	2.29124	2.2738	2.24171	2.1858	2.23623	2.23427	2.06516	2.08603	1.93933	2.09198	1.77553	1.62946	1.67622	1.94072	2.26517	1.94841	2.11774
1.08021	1.0266	1.10981	1.04801	1.05198	1.0671	1.08339	1.12694	1.13007	1.17824	1.08543	1.10024	1.10492	1.19187	1.21947	1.15887	1.11054	1.2114	1.11132	1.12645	1.07819	1.14696	1.10801	1.09785	1.03195	1.0435	1.03252	0.995538	1.01565	0.976196	0.996587	0.939115	1.01885	1.03125	1.04029	1.07669	0.959473	1.11785	0.942279	0.944087	0.926297	0.920977	0.859359	0.926392	0.845283	0.878001	0.893672	0.887869	0.903269	0.826545
0.624196	0.59247	0.58652	0.553689	0.538874	0.551207	0.555031	0.548739	0.531533	0.511262	0.501334	0.495922	0.520354	0.441684	0.470871	0.45126	0.438281	0.429033	0.425806	0.428632	0.449903	0.41776	0.369892	0.341492	0.350421	0.319209	0.285916	0.259142	0.252369	0.24844	0.264757	0.245687	0.363826	0.457247	0.398324	0.375943	0.4526	0.465825	0.503473	0.446919	0.412905	0.379319	0.406048	0.40546	0.375729	0.3597	0.420954	0.473468	0.556686	0.498837
0.930902	0.839428	0.823053	0.822835	0.798608	0.771962	0.872364	0.877421	0.825485	0.815852	0.796177	0.800805	0.847894	0.841635	0.860552	0.857145	0.897142	0.871614	0.845623	0.908372	0.878662	0.946049	0.914596	0.921467	0.908091	0.956444	0.953368	0.925544	0.880429	0.916758	0.876322	0.902045	0.950743	1.21237	1.4095	1.41698	1.40594	1.42504	1.40541	1.73172	1.47974	1.59581	1.69239	1.72178	1.97519	2.06107	1.84519	1.83841	1.69797	1.51229
0.887553	0.848343	0.888535	0.859682	0.944451	0.928285	0.961567	0.925172	0.964524	0.930299	0.944939	0.993178	0.981376	0.953426	0.910533	0.887386	0.851036	0.839978	0.803676	0.790164	0.808076	0.824733	0.85187	0.925851	0.975909	0.889025	0.951779	0.955492	0.959206	0.959583	0.951124	0.870391	1.01825	1.3394	1.25821	1.25433	1.19181	1.16826	1.16272	1.22124	1.16629	1.25556	1.2315	1.36456	1.12598	1.21051	1.19497	1.09813	1.10038	1.10105
0.760448	0.716736	0.710558	0.722894	0.680088	0.744781	0.669814	0.700427	0.65873	0.725847	0.684345	0.707733	0.692808	0.795887	0.724146	0.739106	0.73845	0.730839	0.721009	0.722097	0.696932	0.705597	0.712487	0.747444	0.761882	0.721454	0.719104	0.663116	0.68095	0.635736	0.667629	0.665912	0.688625	0.795915	0.865049	0.966796	1.02332	1.0641	1.04732	1.06272	1.05298	1.03358	1.06616	1.06024	1.07173	1.07385	1.08767	1.10428	1.11487	1.12733
2.22949	2.00223	2.00046	1.76423	1.9853	1.94326	1.84977	1.83668	1.81175	1.84485	1.75824	1.81788	1.7673	1.58811	1.70891	1.55375	1.64704	1.51957	1.65142	1.66638	1.62513	1.61557	1.54276	1.5581	1.57068	1.73778	1.56106	1.58918	1.56923	1.62719	1.68576	1.72716	1.88877	1.89847	2.26569	2.20857	2.10263	2.25849	2.0089	1.86505	1.8436	1.98295	2.01557	1.86256	1.8256	1.69965	1.82619	1.82167	1.62695	1.84972
0.903482	0.952104	0.943878	0.919533	0.952476	0.906149	0.942719	0.795064	0.917334	0.898617	0.915473	0.961862	0.948395	1.09467	1.29525	1.14753	1.33471	1.29331	1.24617	1.14887	1.03369	1.11004	1.12728	1.00156	0.882763	0.919077	1.01074	0.895223	0.92862	0.844048	0.846736	0.874585	1.01298	1.29431	1.49173	1.32275	1.21783	1.46719	1.44438	1.50816	1.59774	1.68512	1.69782	1.67429	1.62193	1.63122	1.58332	1.53614	1.50452	1.49044
0.970995	0.93477	0.964464	0.925287	0.893507	0.864511	0.837613	0.743003	0.794807	0.805247	0.729544	0.837894	0.79137	0.888527	0.908412	0.840781	0.752656	0.765584	0.812241	0.846426	0.884364	0.883761	0.919902	0.902023	0.814081	0.812022	0.820181	0.835251	0.870628	0.796519	0.873601	0.841829	0.938836	1.10822	1.12858	1.27296	1.30287	1.62836	1.68047	1.73359	1.75941	1.75844	1.70961	1.67533	1.69309	1.59871	1.73307	1.75046	1.58587	1.64173
0.688876	0.659676	0.670858	0.691884	0.723927	0.715722	0.735606	0.678305	0.651426	0.671839	0.699299	0.75357	0.711671	0.690193	0.745726	0.724521	0.710669	0.698568	0.718439	0.709538	0.742546	0.720033	0.693594	0.691842	0.62382	0.597109	0.601006	0.590709	0.610643	0.59829	0.55634	0.562803	0.618454	0.752167	0.918771	1.08851	1.19326	1.11627	1.08608	1.08097	0.954599	0.983423	1.08401	1.22355	1.22165	1.22716	1.12168	1.17827	1.17694	1.22539
0.795452	0.736059	0.696308	0.695427	0.689348	0.681031	0.674895	0.666815	0.650064	0.643176	0.632544	0.624885	0.621976	0.57895	0.544921	0.525443	0.521221	0.520753	0.513528	0.548144	0.529273	0.553626	0.548778	0.547563	0.547061	0.540782	0.566997	0.56969	0.57107	0.560786	0.543739	0.54301	0.57523	0.78214	0.832435	0.909838	0.914447	0.926388	0.970383	1.03217	1.12184	1.01802	1.0669	1.03057	1.02569	1.00394	1.10621	1.06294	1.12977	1.11178
1.60285	1.60072	1.65197	1.5138	1.47196	1.48086	1.46046	1.3416	1.29429	1.25762	1.19511	1.16023	1.17192	1.14511	1.10902	1.08607	1.07575	1.05656	1.04225	1.0153	1.03064	1.08729	1.03558	1.13143	1.11211	1.07944	1.19503	1.15384	1.15898	1.11766	1.12777	1.09302	1.20703	1.30563	1.32737	1.43555	1.44486	1.58929	1.53726	1.63374	1.64641	1.53107	1.71291	1.50803	1.41395	1.51372	1.56268	1.45779	1.53658	1.4205
1.49296	1.49368	1.48709	1.44295	1.36096	1.25538	1.26513	1.2036	1.20938	1.22556	1.24018	1.26206	1.24025	1.18266	1.2534	1.24205	1.24616	1.27205	1.11807	1.08551	1.18208	1.13766	1.2093	1.18012	1.19171	1.16491	1.19762	1.16245	1.12491	1.1856	1.18196	1.14697	1.30213	1.47263	1.59123	1.52634	1.53204	1.6467	1.71007	1.69907	1.70944	1.81401	1.73448	1.60942	1.56046	1.71907	1.61423	1.81165	1.79452	1.77738
1.05818	0.952474	0.98236	0.980268	0.96503	0.976188	0.992164	0.948003	0.954041	0.9198	0.861636	0.928601	0.966358	0.912463	0.899533	0.899318	0.863533	0.827798	0.799482	0.846973	0.828868	0.838306	0.89759	0.890387	0.874029	0.882465	0.851631	0.823765	0.786357	0.762472	0.794782	0.784953	0.858491	0.976475	1.11134	1.18281	1.24425	1.3224	1.32285	1.2564	1.28555	1.25149	1.34132	1.32162	1.36793	1.24345	1.33919	1.29142	1.3108	1.31097
0.673128	0.636614	0.549735	0.571967	0.596467	0.670875	0.667575	0.563388	0.654035	0.678725	0.739309	0.799893	0.948534	1.03679	1.09404	1.05414	0.977682	1.05673	1.05969	0.94711	1.03076	0.936118	0.965065	1.02624	0.982438	0.960847	0.925287	0.801503	0.822735	0.808687	0.712412	0.678616	0.698119	0.770387	0.893216	0.936684	1.02178	1.05376	1.11663	0.905625	0.977119	0.994443	0.921688	0.99062	0.927399	1.08721	1.13707	1.09034	1.06409	1.06522
[truncated: 711 more rows]
[truncated: 174 more columns]

## Sheet: WTMEFs_V_TFEBKTR
WTMEFs_NLSmceruleanTFEBTR; cells cultured with Vehicle at -6h, 2.5mM Glut at -5h, stimulated at time point(s) 15, 33, 55; sampling time: 6 min; data are cells-by-time
[truncated: 1,893 more rows]
[truncated: 174 more columns]
