# Supplementary material for: Continuous sensing of nutrients and growth factors by the mTORC1-TFEB axis
Source: eLife. 2023 Sep 12;12:e74903. doi: 10.7554/eLife.74903 (PMC10547473; doi:10.7554/eLife.74903)
Supplement: Figure 5—source data 1. [file elife-74903-fig5-data1.xlsx]

## Sheet: tfeb Con_0Ins0xGluc
TFEBTR_TOP; cells cultured with 0ng/mL Ins 0xGluc; sampling time: 7.5 min; data are cells-by-time
Treated with: 0xEAA
Replicate 1, Treated at time point 36
0.319634	0.266599	0.227089	0.202978				0.137873		0.204321			0.196803		0.29109													0.465594	0.449696	0.43803	0.427102	0.4056	0.393821	0.380774	0.376844	0.377423	0.381469	0.408863	0.409603	0.419181	0.404779	0.435221	0.39593	0.380884	0.377048	0.379452	0.382057	0.370754	0.378715	0.36313
0.628707	0.588245	0.564438	0.579834	0.57122	0.553834	0.682044	0.600875	0.654155	0.56167	0.583244	0.632686	0.589948	0.627195	0.694382	0.723007	0.799165	0.70146	0.612148	0.636224	0.560691	0.59603	0.61016	0.565179	0.535834	0.499966	0.467046	0.390581	0.377193	0.380513	0.376126	0.292151	0.335371	0.285166	0.336057	0.333176	0.330143	0.404443	0.378361	0.32659	0.35247	0.32007	0.350549	0.412788		0.41485			0.315272	0.371836
1.02662	0.50335	0.828127	0.713244	0.635321		0.819791		0.626677	1.41033	0.802958	0.749269	0.796886	0.665356	0.947879	0.576106	0.469583	0.562546	0.678761	0.550675	0.534329	0.41947	0.995732		0.406093		0.396956	0.400412	0.41674	0.432339	0.421621		0.397805	0.45665	0.449942		0.447314	0.481772	0.477896	0.475188		0.507266	0.510423	0.499097	0.485664	0.486294	0.544393	0.470741	0.496808	0.494109
1.22736	0.84287	0.869063			0.858077															0.970264		0.842494		0.990784		1.10631	0.912862		1.14327	1.32052	1.16728	1.33243	1.32694	1.1886	1.19647	1.11044		1.27628	1.19912	1.14466	1.06029	1.18331	0.884313	0.970941	1.09818	1.17724	0.880689	0.96083	1.00053
0.332761	0.337155	0.343909	0.356508	0.614088			0.445438	0.535858	0.589497											0.516536	0.39803	0.379912	0.430533	0.390268	0.377073	0.381326	0.379429	0.389428	0.394453	0.398306		0.381609	0.389255	0.432453	0.428763	0.416765	0.457569	0.435825	0.430768	0.412551	0.41736	0.423793	0.411961		0.430566	0.412552	0.383658	0.380332	0.400755
0.388585	0.322473	0.382576	0.394737	0.401014			0.406768										0.358233		0.411496				0.454574		0.656297		0.480424	0.47588	0.495045	0.520283	0.509557	0.497045	0.507101	0.515809	0.502704	0.509738		0.516992	0.523338	0.488371		0.483545	0.489846	0.497633	0.541798	0.497319	0.519782	0.496599	0.481159
4.22833					0.177329	0.178509	0.183792			0.217534						0.249065					0.2389	0.21645	0.293611		0.234048	0.215331	0.22574	0.215429	0.206857	0.244353					0.202541	0.218574				0.26543		0.22953		0.239971	0.258329		0.247883		0.24127
0.165553	0.192829	0.192714	0.182331		0.209849	1.45071		1.78901	1.53952	1.23602	1.26999		1.22257	1.07192	1.64544	1.66203		1.552	1.51708	1.61534	1.6583	1.21152			1.27172	1.28669	1.22778	1.54525		1.45024	1.36154	1.29751		1.03999	1.35929	1.0559	1.06906							0.392836	0.388981	0.402706		0.37489
1.1814	1.07309	1.73095	1.54795	1.63238	1.52129	1.57654	1.3928	0.972896	1.3954	1.04877	1.43227	2.60816	1.83623	2.08764	1.81351	1.61026	2.00898	1.87688	2.06913	2.43696	1.53267	1.61938	1.69626	2.07946	2.92213	1.6593	2.4157	2.05028	1.99039	2.31456	2.23727	2.91612	1.79902	2.45501	2.06561	2.5231	2.18156	3.14504	3.18559	2.74775		2.2746	2.05653	1.99867	0.69511	2.53008	1.46975		1.80704
0.495681	0.677638	0.693155	0.660359		0.710625		0.691104	0.767471		0.543285	0.536474	0.557652		0.526527							0.351595	0.364668	0.358617	0.352425	0.349499	0.355556	0.363489	0.375247	0.366397	0.389815	0.400253	0.388673		0.361441	0.369713	0.350647	0.37554	0.356727	0.363393		0.347445	0.339381		0.347001
0.297942	0.502409	0.499537	0.424652			0.357691												0.474539	0.441775	0.446419				0.45375				0.510514	0.461688				0.540981	0.554716	0.541294	0.631189	0.629068		0.6887	0.48843	0.543784		0.585271		0.579361	0.548509	0.526586
0.705586	1.48886	1.00948	1.10243		1.02222	0.964029	1.9084	1.08722	1.02146	0.889823	1.06219	0.757405	0.813888	0.915191	0.637512		0.471752	0.383235	0.554535	0.517781	0.355042	0.630974		0.374495	0.426347	0.583222		0.538418	0.427342	0.586534		0.467648	0.499886		0.649561	0.467753	0.303111	0.279387	0.262633	0.301369	0.336845	0.299516	0.318207	0.522835	0.395231	0.395654	0.378109
0.299053	0.277576	0.359863	0.359661	0.325446	0.455516	0.574706		0.335674	0.467159			0.561114	1.81516		1.3786	1.02652	1.0693	0.988667		0.982593		0.934055		0.707148	0.76853		0.769224	0.822051	0.759408	0.771416	0.72465	0.722506	0.714794	0.669777	0.70216	0.724229	0.730621	0.850647	0.813796	0.819647	0.789113	0.90675	0.960505	0.93939	0.932384	0.900936	0.878187	0.812511	0.836766
0.219606	0.231112	0.273665	0.226871		0.350165	0.29545	0.255881																			0.568168	0.614691	0.503092	0.630712	0.523756			0.570944	0.534753	0.582682	0.573609	0.586613	0.564417	0.520502	0.52475	0.506451		0.507785	0.519347	0.56072	0.565614		0.567965	0.575663
0.434159	0.457034	0.395347			0.523479	0.51992	0.565034		0.63026	0.555581	0.730093	0.544124	0.559763					0.632545	0.577098	0.571368	0.550105					0.518621	0.53289	0.52975	0.530211	0.513666		0.523269			0.515207	0.528754			0.583581		0.599489	0.616413	0.613706	0.646587	0.622998	0.64479
0.522319	0.532674	0.555519	0.511428	0.498483														0.448994	0.442378	0.430062	0.451576			0.420307	0.421228	0.426636		0.423519	0.446534	0.421091			0.393902			0.425053	0.457658	0.446162	0.453708	0.453956				0.447964	0.447258	0.448294	0.466013	0.468528	0.46722
0.799399	0.718006	0.813574		0.720103		0.675576				0.697381							0.483206		0.472823	0.457422	0.446541		0.410527				0.506085		0.557139	0.512478	0.471564		0.506233	0.434522	0.498398	0.440441	0.462613	0.551101	0.451453	0.541157	0.471166	0.570912	0.545859	0.437777		0.527592		0.57939	0.648024
1.10568	0.932234			0.273949		1.07119		1.42315	0.845403			1.86223	1.96712					1.72887	0.862823	1.33842	1.06476	0.6955			0.641556	0.655414	0.471241	0.588264		0.498645						0.546199
0.614313	0.687233	0.611426	0.785008		0.790294	0.551303	0.706742	0.516076		0.45091			0.473658	0.842174	0.852298	1.27455		2.08705	1.75352	1.76769		1.76843	1.25679	1.50944	1.1747	0.813435	0.454705	0.367894	0.298515		0.25749	0.283374		0.259884	0.271949	0.257971			0.253716			0.248779	0.235825	0.242584	0.248991	0.282128	0.29979	0.284298
0.485608	0.503792	0.540279	0.593414														0.52674		0.463654	0.519325	0.521074		0.498898	0.525905									0.440582	0.417784	0.433593	0.405421	0.409471	0.43276		0.424815		0.419	0.384312	0.392467	0.405967	0.38816	0.39027		0.370638
0.421499	0.442058	0.555856	0.507589	0.438014	0.491341			0.399319							0.663583			0.542893	0.386628													0.377326	0.353699	0.350655		0.368684			0.395071	0.36532	0.350897		0.341054	0.328029	0.322856	0.35587	0.340081	0.346461	0.363189
0.601178	0.774931	0.798599		0.888123	1.14556	1.3063	2.02768	0.762414	0.812165	0.712275	0.684669	0.735295		0.65711		0.704656	0.859594	0.836331	0.835987	0.838539	0.80642	0.747212		0.72504			0.79122	0.771626	0.735333	0.731933	0.739009	0.751114	0.737688	0.75319	0.748112	0.776771			0.763307	0.752205	0.726195	0.715493	0.71163	0.695753	0.786312			0.651905	0.707326
0.304431	0.339083	0.372857	0.337283													0.52919					0.510818				0.358393	0.427689	0.380003	0.352552		0.348024	0.383711		0.363965	0.335422		0.340923	0.349319						0.335828	0.365463	0.373978	0.394691		0.394464
0.316914	0.315527	0.424319												0.298712	0.460015		0.267353	0.248353	0.246873				0.242652			0.234213	0.216574	0.218923		0.186864	0.226857	0.229434	0.207514	0.20676	0.210697	0.191132	0.205315					0.190203		0.197374			0.206039	0.211859	0.204775
	3.48007	3.9155	4.07217	4.3394	2.05216																			1.02618	1.1014	1.13332	1.18216	0.876814		1.02431	1.16251	1.01698	1.00748	1.21173	1.14535	1.25173	1.32303	1.19972	1.10984	1.10779		1.20624	1.2307	1.31043	1.33691	1.24866	1.1535	1.16576	1.19397
	0.557831	0.432937	0.722757			0.704004	0.58591													0.766591		0.67355	0.69589	0.904254	0.83907	0.752338	0.79353		0.748519	0.743667	0.705312		0.893235	0.995814	0.814662	0.797203	0.816314	0.633308	0.787701	0.657919		0.641487	0.653477	0.6077	0.569237	0.474189	0.631857	0.50389	0.591282
	0.766906	0.835768	0.900775		0.925138		0.973617	0.992393	0.981268			0.971042	0.912055	0.836794			0.741		0.71388			0.809913	0.793213		0.852416	0.760011	0.837707	0.790887	0.688674														0.848243	0.846044	0.868628	0.831358		0.903758
	0.215767	0.19165	0.205567	0.215148	0.192157	0.201017	0.185575			0.19796	0.234925	0.206807	0.239081	0.237796	0.214974								0.696199	0.433442	0.559481		0.486723	0.555596	0.798118		0.474741		0.469196	0.430887	0.824442	0.451851	0.365009	0.507632	0.343586	0.362356		0.328054		0.338782		0.34972		0.34182
	1.16721	1.39077	1.46555	1.1696	1.23375	1.47745	1.34221	1.49108	1.37119	1.49029	1.24201	1.41595	1.44005	1.05773	1.05623	1.26336	1.24607	1.37756	0.98157	1.2372	1.19314	1.08748	1.19155	0.988522	0.935447	0.811816	0.76405	0.883639	0.779957	0.685861	0.682305	0.699558	0.704094	0.720652	0.684877	0.647131	0.696741		1.06172	1.40534	2.59963	1.86145	1.72957	1.6492			2.0897		2.12745
	0.402592	0.434309	0.428564	0.481608	0.447967	0.439146	0.433568		0.536358		0.598061				0.662462	0.738828			0.482915	0.538537	0.474738	0.502951	0.508913	0.472681	0.472997						0.59456	0.565629	0.632407	0.639116		0.679897	0.602914	0.697807	0.659756	0.563252		0.532508	0.513643	0.548442	0.522642	0.548522	0.605615	0.631773	0.626475
	0.814102	0.921243	0.927744	0.932492					1.58755	1.39047	1.10408	0.827439	0.877898	1.16402	1.73267	1.74489		1.7711	1.73231	1.84516	1.70509	1.23357	1.08442	2.29491	0.651424	0.680969		0.447332	2.1347	0.326856	0.430275	0.175806	0.174479		0.163787	0.15465			0.187258				0.199647	0.19827					0.172166
				1.86238			2.05417		1.40346	2.62772		3.39617	3.10291				3.4874	2.78685	2.23439		2.25751	2.08435	2.15064		1.89948	1.93403	1.65698		0.394469	0.387651	0.334587	0.344202	0.53085	0.321307	0.384598	0.420412	0.399084			0.490168	0.396332		0.491356	0.555506	0.617383		0.634794		0.557928
		0.265005	0.289078	0.318692	0.312184		0.25985	0.317212							0.354417		0.256003		0.238564	0.242432	0.228175	0.226469				0.274628	0.212224				0.24785			0.380679												0.507357	0.51414
			0.397318	0.4099	0.452374	0.433408				0.493919	0.508161	0.715123	0.509096			0.475572		0.493638	0.417238	0.376728	0.347783	0.370932	0.311256	0.305313	0.308223	0.282195			0.215436		0.224324				0.236207	0.234222	0.317923	0.265735	0.259131	0.285053	0.268887	0.280451	0.244733	0.271706		0.300907	0.35933	0.354113	0.365841
			0.378651	0.336565	0.320262			0.391847	0.573673										0.398874	0.434423		0.452218	0.46563		0.618546	0.345806	0.324005	0.328432	0.310407	0.30245	0.324347	0.317692	0.316016	0.332079	0.350823	0.329162		0.357216	0.363603	0.357188	0.352035	0.342599	0.349514	0.368696		0.375704	0.373168	0.339015	0.386037
			0.247044	0.294169	0.264447		0.266141		0.28833		0.292717	0.326851		0.314638									0.244351	0.242692	0.24365						0.261802	0.245183		0.277048	0.284303	0.283609	0.302643			0.310141			0.322776	0.319123				0.334313
				0.965124	0.857152	0.801757	0.837773	0.943484	1.06638	1.11414	1.08059	1.0658											0.708172						0.734681		0.701175			0.576512	0.528932	0.526618	0.528427	0.552613	0.579124		0.524369	0.512076	0.726842	0.682525				0.531864
				3.67401	3.6643	3.61572					4.32268		2.53549	1.34494	2.12596	1.67481	1.23804		0.767146	0.603901	0.740107				0.827102											0.429638		0.483546	0.446946			0.443668	0.491862	0.4324	0.451091
				0.674015	0.686902	0.674373		0.688034		0.709471					0.547529		0.450888	0.414424	0.424679																				0.315817		0.288786	0.287328	0.287961	0.309567		0.28513	0.304302		0.302072
				1.27167	1.26979	1.29896	1.38936	1.63383	1.76635						2.10396	1.91457		1.23001		1.2949	1.55207				1.22076	1.29972	1.2146	1.20765	1.24857	0.793857	1.12545		1.15045	0.629706	1.3581	0.841753	0.811938		1.14975	0.953264	1.23287			1.41001	1.40642		0.735959
					0.295756	0.320709	0.266447										0.30422	0.289843	0.368124					0.321407	0.288181	0.297583	0.42129	0.308836	0.372497			0.302237	0.354986	0.341183		0.324715	0.346745	0.375108	0.374936		0.360965			0.331993	0.349606	0.336188	0.34642	0.299858	0.280828
					0.305385	0.330605	0.333157	0.349453		1.44381	2.60448	2.45419			4.6608		5.19361		3.47915																														0.522138
						3.08259	2.59657	1.67426	1.52805		1.46464	1.06064					1.15272			1.11988	1.14162	1.21379	1.31012		1.39059	1.059	1.11284	1.04813	1.08621	1.03201				1.19686	0.961055	1.18162	1.15494	1.42036	1.51616	1.22446	1.40262	1.34514	1.41665		1.30336	1.18186	1.21562	1.26724	1.24013
							1.5477	1.69223	1.65523	1.62186	1.54644	1.55356	1.66576	1.49165	1.50044	1.45619	1.4854	1.53778	1.43269	1.35332	1.23443	1.14447	1.32176		1.16738	1.23143	1.16743	1.10123			1.37938	1.2483	1.28179	0.94929	1.30424	0.905604	0.887447	0.775499	1.3656	1.31093	0.851963	0.798719		1.01318	0.871063	1.0926	0.850636	0.857732	0.86693
										2.03839	1.66998	1.83144	1.72541			1.7357	1.97454	1.70189	1.84628	1.56932	0.779119		1.44762	0.710104	0.71054	0.847142	0.699184			1.0934	1.16143		2.0224		1.76076	2.47558	0.837745				0.863903			1.89321			1.01312
															1.43811	1.61074	1.49865	1.53177	1.33282	1.43574	1.57778	1.3457	1.25283	1.24673	1.18395		1.8877	0.949621	1.01106	0.881705	0.803387	0.861936	0.959379	0.976969	1.06485	1.01018	1.14616	1.17665	1.14273	1.20885	1.12398	1.14769	1.19366	1.16833	1.13292	1.12666	1.1969	1.13131	1.09876
																	0.653346	0.542647	0.485693	0.47709	0.44699	0.451399				0.463622	0.458199	0.497192	0.496519	0.528261	0.499702	0.502444	0.47968	0.443631	0.49839	0.497387	0.534832	0.53108		0.514928	0.489326	0.471575	0.464228	0.478506	0.486762	0.453515	0.488039	0.475737
																	3.5617	2.67733	2.93986	3.07528	2.59004	2.7204	2.51468	2.61969	2.6692	2.41907	2.48304		2.41628		2.27729	2.08476	1.82149	2.31627	2.03507		1.25558	1.33103	1.26751	1.59209	1.47614	1.3997	1.4128	1.40312	1.23088		1.39252	1.39854	1.32313
																			0.332042	0.320978	0.306551		0.300182	0.297569			0.293617			0.281175		0.297182	0.299604	0.309145	0.306165		0.283701			0.280989			0.30456	0.333005				0.336666
																				0.538794	0.569906	0.406449	0.505372		0.449728	0.411002	0.403303	0.395212	0.414948	0.433657	0.508078	0.502714	0.582665	0.553176	0.524234	0.500595		0.501692	0.501783	0.489341	0.523092		0.48768	0.456262	0.440293	0.477677	0.513831	0.55732	0.441314
																				0.844413	0.480648	0.690844	0.318259		0.340611	0.261252	0.277084	0.217507	0.222502	0.19291	0.176228	0.157298	0.18286	0.17761	0.160799	0.163532	0.183589	0.178167	0.16442	0.155614	0.148012	0.138285	0.13794	0.168792	0.163715	0.172314	0.149537	0.156259	0.153599
																				0.182692	0.143599	0.139632	0.14348	0.133709	0.130244	0.115344		0.136107		0.135165		0.141716	0.146844	0.135131		0.132521	0.155326	0.179441	0.181894		0.18186	0.175676	0.176245	0.172217	0.226538	0.221057	0.230619	0.207584	0.211518
																				0.380212							0.354187		0.387318	0.347433	0.385702	0.356487	0.364461	0.407932	0.41872	0.39627	0.386221	0.407291	0.412261	0.403204	0.422123	0.431931	0.432143	0.468169	0.494864	0.484882	0.511367	0.522653	0.565205
																				0.453534	0.379238	0.388851	0.387197	0.39959	0.39604	0.398922	0.415863		0.412279	0.415832	0.38581	0.382536	0.381322	0.309653	0.319907		0.321384	0.323069		0.321727	0.324712	0.290866	0.305492	0.305637	0.306763	0.310496	0.286888	0.295368
																					0.80353	0.80139	0.770309	0.750683		0.75875	0.76531	0.756749	0.776851	0.774388	0.761922		0.724391		0.725661	0.702638	0.665834		0.618843	0.586961	0.588561	0.604275	0.55764	0.537091	0.532853	0.508083	0.516089	0.536378	0.511374
																					0.59697	0.635083	0.653882		0.424186		0.459481	0.395844	0.347412	0.39713	0.441906	0.334756	0.37167	0.418551	0.500493	0.593201	0.442803	0.450761	0.344146	0.385926	0.326608	0.383104	0.429506	0.366728	0.374402	0.383767	0.379456	0.38343	0.441141
																																									0.305299		0.436657			0.330321	0.349655	0.407335
																						0.407804	0.409943	0.389178	0.41258	0.372886	0.413766	0.40968	0.393981	0.401816	0.38022	0.47152		0.462794	0.494169		0.518566	0.53763	0.574795	0.533317		0.537486		0.588397	0.53748		0.549293	0.531386	0.548788
																						0.432399	0.455629	0.428578		0.428367	0.435443	0.435305	0.475253					0.477476			0.548098							0.502911			0.566695
																									1.03748															1.81108	2.0119	1.48445		1.61193	1.57999			1.72314
																							0.541489	0.612635	0.511658	0.5366	0.56589	0.52373	0.503616	0.478889	0.49717		0.495968	0.945462	0.579579	0.772908	0.525801	0.557471	0.76775		0.552108	0.528607	0.540616	0.551075	0.589627	0.852891	0.564243	0.589166	0.567217
																								0.454199	0.418349	0.533728	0.618866	0.453552	0.567842	0.645491	0.456743			0.388832	0.514867	0.421372						0.634998		0.465215	0.540552	0.559045	0.526841		0.549263
																								0.673739	0.662902	0.70767	0.7177	0.742401	0.845106	0.923094		0.913039	0.964415	1.02295	1.05007	0.957203	1.15446	1.08522	1.03802		1.04455		0.900117	1.00611	1.031	1.07362		1.19068	1.17281
																									0.669894	1.03025	0.631316	0.475326	0.669419	0.792532	1.33193			0.645461		0.702717	0.653183				1.17318	0.59762	0.719476	0.606785	0.52602	1.14629	0.659995	0.583922
																									1.26226	1.12352	0.81873	0.68934		0.634214	0.566411	0.607061	0.614135		0.681398	0.791767	0.763668	0.593817	0.625625	0.596687	0.597046	0.577512	0.676271		0.548456			0.564915
																									1.01498	0.903125	0.798366		0.849308	0.856026	0.9037	0.870542	0.858988	0.957251	0.976878	0.932445	1.02011	0.841904	0.922444	0.887035	0.867494	0.836691		0.761893	0.83129	0.757675	0.824744	0.897473
																										0.203037	0.217593	0.220479	0.221852	0.21698	0.244692	0.272767	0.290192	0.265542	0.257205	0.251594	0.258911	0.271935	0.276429		0.313317	0.311684	0.31683	0.343262	0.373518	0.374167	0.402261	0.366427	0.360366
																										0.774652	0.821542	0.879224	0.892757		0.926007	0.938199		0.839497		1.2373		1.48756	1.24082	0.422238				0.443243	0.49646	0.427549
																											0.172695	0.174283	0.172317	0.186138	0.18834	0.196744			0.21672	0.21027		0.224891	0.213182	0.221426	0.215792	0.218542	0.208158	0.202601	0.201048	0.228046	0.222741	0.243782	0.231115
																												0.828109	0.760151	0.693907	0.582762		0.392908				0.998912				0.748866		0.519092	0.496661	0.547617	0.556145	0.542348		0.604531
																												0.382927	0.380305	0.46646	0.376044	0.376979	0.371043	0.366275	0.354895	0.496498	0.435958	0.377163	0.524418		0.433073			0.529183	0.391166	0.353484		0.475842
																												1.04202	1.03472	1.07199		1.07107	1.0913	1.10687	1.09785	1.1196	1.02785			1.09857	1.07254	0.994022	0.955848	1.03361	0.980578		0.972651		1.08293
																													0.49134	0.461816	0.486197	0.499205	0.497404	0.499347	0.742092	0.499056	0.58015	0.702941		0.554678	0.641507	0.658245	0.554301		0.539954	0.602052	0.581922	0.548829
																													1.05404	1.00626	0.928913	0.890836	0.859999	0.965709		0.912409		0.874978	0.882094	0.832067	0.817131	0.789377		0.823604	0.794409	0.853403		0.777569
																													0.765808	0.751871	0.760812	0.785463	0.76378	0.826442	0.835326	0.82843	0.829752	0.845185		0.822878	0.825176	0.861301	0.88525	0.869684	0.904117	0.915673	0.985097	0.964086	1.00387
																														0.502975	0.486579	0.52716	0.482245			0.497668	0.511428	0.496594	0.505413	0.480864	0.481119			0.479988	0.508069			0.509642
																															0.607498	0.586608	0.540881	0.531266	0.554261		0.594651	0.625342	0.63502	0.54412	0.602805		0.558871	0.558815	0.568518	0.574605	0.535753	0.544725	0.517374
																															2.7478	3.3128	3.15451		3.98464	3.11972	2.79925	2.24105
																															0.707593	0.675182	0.72957	0.731135	0.729471	0.791322	0.846629	0.755955	0.761406	0.719964		0.648319	0.690897	0.58542	0.647358	0.663774	0.771882	0.630514	0.786244
																																1.16399	1.0876	1.41949	1.14849			1.231				0.962678			0.884226			0.892078
																																5.00801	3.20602	3.33389	2.84302	2.92958	3.67436	3.31099			3.44731	3.77064	3.74617	3.86015				3.26207
																																0.609306	0.587403	0.55001	0.544237		0.538793	0.512762	0.537241	0.48077	0.450785	0.4676	0.437135	0.417534	0.455207		0.448256	0.455947	0.48894
																																	0.350638	0.392047	0.370158	0.320206	0.290777	0.271968	0.303596	0.307107	0.265756	0.309637	0.27642	0.278609	0.277555		0.264038	0.305881	0.274515
																																	0.751473	0.726252	0.838493			0.741805	0.761055		0.705652	0.671321	0.626862	0.594057				0.614759	0.643438
																																	0.533878	0.589693	0.563735		0.622083	0.55689	0.549719		0.502448	0.541447	0.583003	0.55584	0.559725	0.578422		0.574479	0.590706
																																	1.03655	1.05579	1.14812	1.18597			1.2194		1.09453	1.15243	1.16719			1.15284	1.2004
																																		1.96254	1.05725	0.996615	0.989358	1.10456	1.3157	1.32823				1.12597	1.05479	1.07858	0.985739		1.4592
																																		0.469324	0.4623	0.495176	0.440808	0.448234	0.52806	0.500068	0.396686	0.370573	0.392452		0.401461	0.375546	0.400228	0.38363	0.364893
																																		0.47207	0.591187	0.514026	0.569163	0.522005		0.511856	0.491623	0.499772	0.471833	0.47412	0.463438	0.497851	0.505115	0.489912	0.503162
																																			0.315772	0.269955	0.272698	0.268111	0.273818	0.266052	0.257347	0.250076	0.244929	0.238998		0.239875		0.261087	0.246704
																																				1.5025		1.4512	1.13725				0.884656	0.826082					0.858915
																																				0.385426	0.349365	0.348457	0.326382	0.397342	0.297769		0.305571	0.387411	0.409091		0.387821	0.343588	0.340095
																																				0.446623	0.441273	0.410283	0.398938	0.445381	0.444113		0.420723	0.429564	0.430093	0.372078	0.417886	0.418213	0.41878
																																				0.337755	0.375692	0.380652	0.352628	0.353659		0.350876		0.349133		0.368657		0.373672	0.373773
																																				0.631964	0.365256	0.45643	0.48023	0.371935	0.995215	0.441999		0.723087	0.866295	0.655909	0.362257		0.663542
																																				0.524736	0.308491	0.430117	0.348606	0.396482
																																					0.966143	0.957306	0.967852	0.931611	0.89197	0.888115	0.809289	0.836146	0.805693	0.811897		0.809472	0.808528
																																					0.465462	0.445577	0.468894		0.44147	0.488355		0.606318	0.501529	0.532123	0.527899
																																						0.533501	0.488734	0.437587	0.441672	0.431591	0.475607	0.425167		0.485802	0.461272	0.491397	0.478332
																																						0.526724	0.537451	0.557261	0.535093	0.56075	0.527523		0.53851	0.554806	0.510526	0.498263	0.503456
																																						0.51579	0.445533	0.469027	0.432283	0.413917	0.426849		0.457732	0.446456	0.449326	0.474181	0.451236
																																							0.49117	0.377073	0.400773	0.387274	0.346933	0.383618		0.364271		0.500235	0.345571
																																							0.202786	0.192735	0.187664	0.224417	0.172486	0.186632			0.246167	0.2467	0.285324
																																							0.36399	0.421914	0.352103	0.392487	0.364041	0.340595	0.377544		0.350459	0.329743	0.404119
																																							0.456299	0.428566	0.453777					0.513764	0.42675	0.377844
																																							0.384751	0.361853	0.419215	0.384405	0.420051		0.428041	0.405845	0.383806	0.502355	0.419477
																																								0.54145	0.513336	0.544967	0.496333	0.515234	0.519943	0.511841	0.520943	0.484299	0.497778
																																								0.442595	0.361239	0.329539						0.41626	0.462449
																																								2.40228	1.96736	1.52954	1.18124
																																									0.423038	0.387358	0.587691		0.382457		0.420674	0.409046	0.409022
																																									0.611625	0.562597	0.583006	0.561575	0.580952	0.575328	0.572455	0.559711	0.556503
																																										1.58186	1.30429	1.78	1.37407			3.59141	2.60881
																																											0.795526	0.852123	0.75791		0.677567	0.76338	0.687483
																																												1.27519	3.49417	1.21904	0.361446	0.356566	0.22725
																																												0.860435	1.17171	1.1879	1.20767	1.52549	1.13498
																																													0.887297	0.69483	0.867151	0.864245	0.871265
																																													0.651894	0.641459	0.475028	0.449355
																																														0.142784	0.16569	0.110361	0.130227
																																														0.450092	0.413579	0.467534
																																															1.00657	0.907822	0.832742
																																															1.84947	1.7094	0.565173
																																															1.05658	0.888234	1.20873
																																																	0.555134
																																																	0.486098
																																																	0.817709
0.441159	0.268173	0.394006		0.385624		0.274976		0.277171						0.433582	0.417755	0.579092		0.425262	0.413506	0.420005	0.455789	0.484223	0.434631	0.488088	0.422053	0.466975	0.482179	0.502455	0.508769	0.509599	0.488655	0.508059	0.535482	0.524783	0.547466	0.648349	0.584649	0.584801	0.555661	0.556999	0.529725	0.504472	0.659471	0.563152	0.51221	0.605039	0.569126	0.639345	0.602785
0.776187	0.596467	0.592156	0.682499	0.653624	0.940781	0.821892	0.640424	0.719802	0.660107	0.649956	0.925198	0.704898	0.743868	0.715437	0.794285	0.698404	0.728968	0.709842	0.810495	0.616899	0.750399	0.669892	0.674655	0.621945																			0.498087	0.592537			0.601992	0.60218	0.509216
	4.33659	4.74298							2.10096	2.18007	2.13318	1.93159			2.02143				2.02532		1.98524	1.67758	1.66289		1.63468	1.55549	1.39726	1.26158	1.38011	1.11109	1.3071	1.24709		1.55041				1.24422	1.2536					1.28748				1.32879	1.30386
															1.02222									0.475302					0.281746	0.330286	0.234207		0.239662		0.192965	0.211822	0.224332	0.207216	0.223868	0.191399	0.188735	0.205092	0.177694	0.183732	0.183728		0.18405	0.211159	0.21736
0.300026	0.352937	0.471047			0.395527	0.412833	0.322054	0.284603	0.348464	0.317363	0.311087	0.306018	0.324003									0.715266	0.449687	0.502207		0.397523	0.458828	0.393035	0.383966	0.398407	0.399297	0.39602	0.406033	0.402269	0.396031	0.386465	0.378569	0.386147	0.37441	0.370778	0.352498	0.354434	0.342422	0.338644	0.328291	0.314305	0.313465	0.318868	0.309856
																					1.46355		1.43093	1.52546	1.65756				1.71273		2.18866		2.07073	2.62492	2.2596	2.27944	2.20862	2.052	2.10295	2.03103	2.10199	1.88729	2.01457	1.92495	2.03715		2.29337	2.11405	2.04822
1.01518	1.00428	0.963636		1.01071			1.06204														1.3625		1.33688	1.47226	1.4309	1.41198	1.4533	1.4454	1.47511	1.42539	1.56896	1.54239	1.64541	1.78436	1.63119	1.82828	1.71991	1.81317	1.89389	2.13011					1.75667	1.79351		2.80365	2.71278
1.0675	0.804907	0.792476	1.17432	1.32129	1.56628	1.33188	1.26734	1.25157	1.26307	1.21872	1.74857	2.54273	1.63951	2.53804	2.28359	2.39423	1.68796	1.69153	1.69517	1.99868		1.62195		1.74417	1.39658	1.96327	1.4495	1.42957	1.79273		2.19934			1.39629	0.946375
0.454986	0.378829	0.554682		0.526079																	0.534233			0.512076	0.503411	0.503846	0.434419	0.450321	0.414732	0.389797		0.358495	0.359894	0.347236	0.313789	0.319516	0.318288	0.304339	0.328057	0.321515	0.319843	0.314822	0.297181	0.317472	0.296197	0.290665	0.277734	0.306828	0.317409
0.37333	0.405936	0.412474																				0.507026	0.445508	0.460079	0.436642	0.518261	0.451882					0.495628	0.509944		0.500991		0.480265				0.47481			0.473114			0.500613	0.500993	0.507919
0.712781	0.934926	0.977389																		0.910296		0.868436		0.935123			1.14235	0.89152	0.991273			1.09655		1.23637	1.29411	1.44987	1.38916	1.27013	0.943583	1.22542	1.36633	1.54195	1.19687	1.27709	0.978404	1.23025		1.20799	1.40237
1.1053	1.01319	0.974937	0.978163	1.02487	1.04239	1.03276		0.862352	0.938188	0.900014	0.738046	0.928568	0.7999		0.847562	0.719284	0.78222	0.595864	0.60846	0.683164	0.506514	0.537511	0.437079	0.443959			0.525423	0.453581	0.434317	0.389583	0.318568	0.318709	0.360798	0.275193	0.344816		0.316475		0.270006	0.269658			0.298829	0.285662	0.309356
2.06917	2.54375	2.65915		2.48033	2.06424	2.19009			2.19792	2.31114	2.08246	1.96586	2.1569	2.25143	2.19784	1.75568	1.90258		1.75624	1.81338	1.74846	1.72038		1.77773	1.61562	1.62637	1.41267	1.47611	1.43841	1.63084	1.49619	1.47279	1.50009	1.55896	1.61364	1.73829	2.04547	1.97466	2.0659	2.07353				1.80202	1.68529		1.79631	1.95368	1.85999
0.696499	0.620014	0.605871	0.569008	0.534605		0.539828	0.533932				0.591642				0.852505	0.702326	0.757428	0.749914	0.769988	0.800362	0.785037			0.823194	0.763381					0.814184			0.743612		0.734789	0.723729	0.767001		0.740997	0.711299	0.685621			0.688883	0.715021	0.739176		0.654717	0.666113
0.412547	0.385387	0.396452	0.376255	0.428364		0.411659	0.408445	0.366796	0.495828	0.438871		0.451959			0.417229	0.445517	0.495522	0.461917	0.405185	0.397919		0.362077		0.355336	0.351985	0.352561	0.358597		0.38095	0.368668	0.381988		0.399313	0.420667			0.46898	0.448012	0.440864	0.445895	0.459116	0.483179	0.480778
0.453601	0.334632	0.35033																				0.324698			0.263599	0.396283	0.276501	0.363055	0.332078	0.296627		0.281228	0.312504	0.27357	0.264813	0.256161	0.251709	0.255136	0.251298	0.266607	0.214329	0.223803	0.185695		0.19725	0.212829	0.207861	0.233777	0.227085
0.166528	0.192009	0.224075	0.38929	0.313528		0.388577																0.337918	0.259858	0.306388	0.260751		0.203619			0.379653	0.208174	0.278336	0.215796	0.216875	0.213524	0.200675	0.21033	0.214751	0.222281	0.221214	0.212533		0.197355	0.207829	0.214316		0.206746	0.204577	0.204525
	1.32876																0.360298		0.217574	0.206237	0.199284	0.200659	0.20768		0.19105	0.209068	0.230719	0.225043		0.250291	0.264055	0.273521		0.290283	0.290785	0.282879	0.296238		0.311874	0.3008			0.277216	0.276915	0.267858	0.267264	0.265518		0.285454
1.14908	1.31097	1.22535												1.34101		1.33672	1.37645	1.18261	1.18625	1.19154	1.22697	1.11815	1.13149	1.14983	1.06422	1.07743	1.06616	1.06182	1.28615	1.45091	1.2317	1.20124	1.56098	1.40622	1.19531	1.44969		1.22195	1.4849	1.35608	1.48768		1.59552			1.24472	1.62288	1.17561	1.78114
0.315745	0.300389	0.328143	0.318076	0.304511	0.373649	0.431203	0.434711		0.417944	0.365996		0.40935	0.358646	0.482668	0.647413	0.620458	0.549992	0.563866	0.364733	0.560421	0.379708	0.336053	0.315593	0.316942	0.290598	0.300134	0.330621	0.321569	0.480624	0.341678	0.327061											0.408588		0.364235
0.570662	0.54265	0.603348			0.585035	0.548066	0.566394		0.520086	0.565073		0.487719	0.507225		0.442907	0.397647		0.367961	0.377661			0.398456	0.401296	0.402848	0.3893		0.372454	0.363382	0.367814	0.369387	0.381561	0.395787		0.402514		0.386794		0.3669		0.352734	0.366498	0.355893	0.373922	0.378068			0.364243	0.359078
0.347049	0.368622	0.361628		0.37635			0.472635	0.563582									0.422231	0.447631	0.392889	0.405641	0.392773		0.413675			0.461533	0.460818	0.449214			0.472537	0.446655							0.486081			0.440389				0.412257
0.307002	0.299828	0.297472	0.377001	0.328922	0.34206	0.434591	0.457061									0.555953			0.564669	0.476578	0.423035	0.380207		0.353544	0.35909		0.529522	0.804782	1.40046	1.19206	0.967421	1.03294
0.446521	0.377474	0.365806		0.413322																			0.560042	0.505092	0.547149	0.53657	0.557807	0.555396	0.567066		0.628508	0.596039	0.580535	0.558201	0.614107		0.691972	0.719103		0.704998	0.641432	0.727795	0.694386	0.592241				0.570389
0.626146	0.698043	0.929115						1.61663	1.758	1.70383		1.65606																				0.985546		0.845136			0.813496	0.867913	0.752254	0.73162	0.672291	0.607411		0.689872	0.755075	0.784922	0.806112	0.784432	0.811024
0.304129	0.298673	0.285916	0.281718	0.341933	0.355793	0.48357	0.424014									0.47814	0.439514					0.289521	0.40936	0.284563	0.288195	0.280236	0.279403	0.274833		0.270904	0.25964	0.247694	0.269076	0.254737	0.27135	0.24481	0.253259	0.254255	0.243449	0.23972	0.229153	0.22907	0.224493		0.2223	0.23076	0.21763	0.223702	0.235239
0.545459	0.493248	0.494779	0.681592	0.521466		0.76208	0.710972	0.511559	0.601737	0.698781	0.678619	0.665762		0.404923	0.605852	0.426858	0.374706	0.466133	0.460277	0.63482	1.45138	0.548208	0.377946	0.593567	0.559382	0.536186	0.613725	1.13231	0.932851	0.950779	0.867738	0.942593	0.960941	0.924845
	0.745472	0.699045	0.82871	0.817421	0.788468	0.707194	0.762319	0.521348	0.50948	0.414464	0.491389	0.573062	0.536621	0.48036	0.630204			0.520787	0.532211	0.524955	0.475983		0.442024	0.476964			0.46897	0.463435	0.478498	0.493958		0.478215				0.481881	0.438239	0.427018		0.423322			0.337599	0.308676	0.352169
	1.88719	2.07169	2.24712	2.40468	2.20034	2.13548	2.12523	1.82205	1.8442	1.97624		2.00105	1.93187	1.74531	1.72387	1.61911	1.69587	1.92176	2.0952		2.47325	3.06181	3.09487	2.78775	3.09527	2.97821	2.62804	3.02936	2.66539	2.64521	2.81944		2.27894	1.1917		2.26107		1.07481	0.976983		0.964328	0.993631	1.15509		1.3096	1.09613
	2.36825	2.85047	2.3062	2.5191	2.63268	2.1358	2.04501	2.01044	1.92759		1.6659	1.61333	1.52281		2.01352		1.92097	2.03286	1.71217	1.58633		1.16613			0.914135	1.07786			0.999056	1.01673	0.902645	0.993304	0.853328	0.770741	1.20266	0.726199	0.686641	0.636287	0.608915	0.578622	0.549943	0.526947	0.473964	0.521254	0.479591	0.485463	0.507402	0.533531	0.499288
	3.61002	4.91073	4.82424	2.7071	3.28788	4.37076		3.25808	3.43329		2.67083	2.73372	2.71003	2.3518	2.52217	2.17382	2.7038	2.25819	2.11052	2.07805	1.6787	3.7855		1.36553	1.7065	4.33682					2.04319	4.98611		3.29232		0.72181		1.06171		1.73399		1.66063	1.39382	1.48959		1.54543		1.40716	1.15872
	0.548512	0.525532	0.506278																		0.552482		0.626383	0.535544	0.598696	0.571205	0.611571		0.642618	0.597221		0.606928			0.647633	0.629207	0.656807		0.696994	0.699536		0.680628	0.664988	0.693227	0.738869			0.706602
	1.03279	1.11883	0.959418					0.723787												0.683629		0.698442	0.726866	0.679424					0.746352	0.733675			0.866684	0.906709	0.898088	0.935962					1.09168			1.10003
		0.293455	0.357552	0.337661	0.31359	0.286482														0.52469				0.325685		0.29021	0.288732		0.270404		0.271801		0.269847	0.260175	0.246164	0.22641	0.221033		0.230253	0.234246	0.226301	0.233193	0.22963	0.246375	0.231389		0.225748	0.249781
		0.382688	0.649835	0.642788	0.935683			1.21614	1.61328		1.71319					1.00942		1.29569											1.55292	1.49206	1.73825	1.74137		1.53222	1.63705	1.66769	1.71558	1.88276					1.65978	1.59045	1.58778		1.5115		1.65455
		0.593237	1.4506	1.29497	1.45065						0.524702	0.735526	0.536263	0.671251	0.651251	0.58115	0.564883	0.462202						0.424065	0.322101	0.383463	0.383985	0.291989	0.2845	0.272214		0.243005	0.244373			0.286611	0.313574	0.341683	0.25679	0.383121						0.46352	0.435545
		0.269773	0.29892	0.278095	0.28449	0.288166	0.29081	0.404608							0.55662		0.502513	0.321426	0.40819	0.375209	0.314091	0.309884	0.301476	0.287047	0.285035	0.309843		0.344914	0.354847	0.372855	0.366997	0.360423	0.390109	0.382307	0.395511	0.393168	0.395801	0.359272	0.413426	0.390004	0.383757	0.40968	0.390897	0.433205		0.418175	0.409343	0.429859	0.433148
		0.836412	0.742857	0.712846	0.703864	0.66615	0.487864		0.485778	0.430304			0.509733	0.525784	0.515018	0.618246	0.496479	0.511148	0.580887	0.545522		0.690979	0.630912	0.612769	0.619987	0.567636	0.545673		0.661492	0.55509	0.5379	0.559726	0.565537	0.700946	0.590091	0.703959	0.597948	0.61341	0.634781	0.619375	0.658148	0.719955	0.708973	0.605419	0.743606	0.686537	0.589959	0.850239	0.646181
		0.359609	0.279028	0.347937	0.433984	0.523572						0.592126									0.681186																	1.11901	1.41926
		0.471646	0.362139	0.405978		0.556539								0.763258				0.686368		0.878411	0.948449			0.951031	0.701185	0.736736			0.818165	0.849242	0.831157	0.846593	0.74047	0.709343	0.684493	0.723288	0.794531	0.746702	0.837112	0.838475	0.70771	0.8013	0.736954	0.757144	0.766839	0.738525	0.732238
		0.271204	0.270529	0.282892	0.2429	0.252458	0.263852	0.343872	0.271276		0.267015					0.243154			0.222107	0.245305		0.239071			0.254763		0.271665	0.299464		0.27043	0.291297	0.268708			0.248758		0.261922	0.257467	0.261094
		1.79851	1.78118	1.43218	1.78878	1.70136	1.50391	1.48816	1.29773	1.572		1.38517	1.34191		1.47243			1.39001	1.49512	1.60615		1.68189	1.54594	1.59391	1.56393		1.62658		1.53226		1.47686	1.69379	1.59537		1.31213	1.44511		1.55051	1.40021	1.4087		1.72068	1.63245			1.42489	1.6574
		0.310448	0.322071	0.340537	0.455084	0.437337	0.385185								0.383779			0.544021		0.310742	0.438089			0.348004	0.341457	0.324267		0.328284	0.349524		0.332986	0.36621	0.293972					0.284141	0.308215	0.274512			0.287304		0.249361		0.242312	0.26203
			0.629081	0.60998	0.753351	0.715899	0.48173	0.490586	0.584629	0.469861	0.437743	0.465168	0.509341	0.524364	0.462349	0.53304	0.498389	0.466659	0.408712	0.471709	0.500319	0.42406	0.433613	0.476461	0.605877	0.394585	0.423683	0.436494	0.52158	0.454529		0.385785	0.421506	0.590478				0.40439			0.498022	0.47206		0.493816				0.639736
			0.652937	0.719419	0.760378	0.773727	0.746485	0.909341	0.830688	0.753154	0.788727	0.714648		0.705867	0.687955	0.720688	0.691082	0.700709	0.67087	0.609372	0.608949		0.629837	0.593001	0.597198	0.590423	0.57504	0.577931	0.573505	0.59018	0.583655	0.601038	0.641755	0.642229	0.696899	0.738889	0.745614	0.819605	0.797564	0.835059		0.86261	0.881992	0.834826	0.930234	0.837947	0.862438	0.857707	0.884071
			0.771336	0.704939	0.714349	0.765871	0.981403												0.764521	0.75787	0.886173	0.867498	0.772397	0.823527		0.785616	0.8397		0.759869					0.953874			0.803894	1.00234				0.814411
			0.24545	0.2228	0.253265			0.280198									2.44746	1.96674	2.11962					0.289986	0.311608	0.432937	0.345636		0.34092	0.335028			0.384778	0.457068	0.563779		1.67091	0.817073	0.864643		0.77923			0.859763	0.809988				0.613809
			0.546328	0.512383	0.520948		0.587422	0.56625		0.607315		0.695257							0.675832		0.738193	0.75372	0.519328	0.554569	0.413775	0.850183	0.420457	0.452973	0.505624	0.796219	0.702039	0.654362		0.638076	0.687675		0.667483		0.694495	0.688221	0.69573		0.731558	0.705003		0.621496		0.69211
			2.18432	2.1946	1.99924				2.85703	2.46853			1.613	1.6934			1.33658	1.05676	1.59122	1.3478	1.17495	0.991623	1.08963	1.38437				2.97685		2.23808	3.92557				3.98498			0.602996			0.705059				0.537847	0.58939	0.600824		0.668957
			0.348164	0.360345	0.353227	0.361308			0.43726	0.412777							0.365463	0.307274	0.318085	0.283742	0.309123	0.295284	0.317221	0.309677	0.322126		0.374965	0.397043	0.393939					0.39684	0.403576	0.432945			0.470031		0.434653		0.468302	0.469166	0.506322		0.553539		0.576572
			0.301874	0.236639	0.329255																	0.547774	0.480217		0.425292		0.683431	0.261433	0.441151	0.237356	0.240645	0.287928	0.216277		0.193827
			0.160984	0.20761	0.162072	0.271163										0.235017			0.193651	0.186883	0.22232	0.192638	0.16172	0.200494		0.137924		0.16852				0.178168	0.188099	0.183852	0.204698	0.22053				0.228715		0.263054		0.261464	0.264763	0.264546	0.262858	0.262116	0.263359
				0.617475	0.84198	0.884294	0.877062	2.00299	1.42055	2.51387	3.53567	3.31092	2.99954		2.0114	1.86844	1.87979	1.6939	1.46227	1.82904	1.69518	1.38654	1.13727	1.08093	0.991358	1.43157	0.897961	1.10886	1.30109	0.852762	1.36227	0.702466	0.624184	0.682162	0.623612	0.626199	0.793527	0.508322	0.526721	0.502887	0.453848	0.464186	0.521404	0.458137	0.51108	0.498301	0.479514	0.507751	0.540163
				0.647756	0.637388	0.677977	0.631815	0.756669	0.766063	0.832541	0.863128	0.862274	0.963635	1.0601	1.10234	1.0876	1.04635	1.07459	1.07086	1.0679	0.985438	1.0166	1.00059	1.02779	0.997132	1.05166		0.917133	0.922393	0.980293	0.925775	0.886312	0.83011	0.89955	0.895859	0.850289	0.850561		0.983784	0.969505	0.975971	1.01067	1.02762	1.05476	1.07022	1.09593	1.01936	1.10662	1.03517
														1.02111			1.35525			1.5304	1.33724			1.40318						2.51468		2.37755	2.77312	3.07155	4.20077	2.91566		2.13615	3.14957	2.37164	2.28577	2.49796	2.28398	3.05565	2.68749	2.66955	2.77246	2.74389	2.62218
							0.319615	0.408672	0.350482		0.38666	0.375705	0.396705								0.520687		0.511228		0.548657	0.541645	0.567825		0.52917	0.52426	0.583889		0.536676	0.567567		0.562039	0.608439	0.653727	0.663992	0.681752	0.667838	0.674509	0.680079	0.723488	0.721183	0.758384	0.755408	0.711614	0.837176
							0.24352	0.255487	0.296721	0.287188	0.238114	0.273619	0.264131			0.226035		0.227		0.224722	0.238931	0.233526	0.245761	0.268245	0.297339	0.326118	0.299213	0.319096	0.341237	0.337104	0.366688	0.346963	0.371591			0.363463	0.369683	0.380545	0.394711	0.405639		0.382399	0.393891		0.409192		0.416015	0.412546
								1.97837	2.14002	2.1094	1.58324	1.97706		1.60221		1.60346	1.47737	1.39573	1.18915				1.67619	1.21014	1.24047	1.38008		1.64772		1.4301	1.10426					1.06339		0.720425		0.947028		0.993306	0.741083	0.651924		0.741494	0.676076	0.86623
									1.44539	1.58904	1.50904	1.44382				0.579997			0.566564	0.555734	0.589398	0.567803	0.625688		0.697224	0.793148	0.857761	0.815415	0.764431	0.752068	0.777383	0.783332		0.795073		0.776236					0.635073			0.656067	1.11393			0.520081
									2.92245	2.8031	3.32794	2.53765					4.66537	4.00901				5.24588		5.81441	3.45935	2.23227			1.04264	1.06744	0.915641	0.832251	0.686966	0.528216		0.463383	0.657024	0.454467		0.43123	0.473122	0.386778	0.421709	0.485162	0.412191	0.38343	0.504762		0.455372
									0.364165	0.356457	0.394731	0.37801		0.394092		0.372776				0.342108	0.348282	0.330307		0.337726			0.347401		0.326883		0.347227	0.326093			0.334978	0.313503	0.336825		0.32835	0.294352	0.30152			0.300859		0.305551	0.327166	0.305468	0.330579
										3.45775	2.98565	3.39346	4.52304	4.21021					5.66864							0.201328		0.232979	0.249962	0.224371	0.256375		0.553983	0.296721	0.282895	0.346595	0.241409	0.278098	0.213213	0.210889		0.207415		0.289519	0.265891	0.242318	0.241336	0.245361	0.261492
											0.54795	0.547545	0.447673		0.426892	0.340527	0.317566		0.288433	0.294446	0.284272	0.272949	0.26194	0.266797	0.269971		0.290065	0.26717	0.286967	0.295704	0.304842	0.318436				0.296334	0.319891	0.320665	0.331211	0.350111		0.425352	0.393918	0.413543	0.389928		0.356169	0.340983	0.349705
											0.804279	0.635057	0.622043	0.558754	0.500888	0.451377	0.435563		0.3804		0.39088	0.40138		0.398815	0.427372	0.420639	0.447442	0.48397	0.464986	0.450221	0.429274	0.442715	0.453925		0.446578	0.451515	0.493043	0.524172		0.505577	0.46032	0.450869	0.503027	0.619142	0.52157	0.486493	0.475622	0.489017
															1.35124	1.81539	1.36547	0.845266	1.22411	1.26775	1.22381			1.20873	1.08154	1.1246	1.11608	1.00986	0.955814	0.945655	1.02439	0.989981		1.04005					1.17169	1.13411	1.01971			0.993551	0.964398	0.975148	0.930745	0.978234	0.992427
																	0.620323	0.588254	0.563079			0.502699	0.501201	0.520038	0.480032	0.549358	0.56757	0.537692	0.581454	0.566902	0.612457	0.641783	0.654572	0.645205	0.564658	0.594802	0.580005	0.557303	0.611618	0.568354	0.635936	0.615736	0.562646	0.589885	0.558763		0.575847	0.570064
																	0.367553	0.38901	0.385599	0.4365	0.443407		0.450584	0.424219	0.460577	0.480439		0.439766		0.42565	0.444356	0.457618		0.458283			0.473445	0.474681	0.493493	0.443656	0.437539	0.43515	0.437021	0.435031	0.407293	0.40753	0.462599	0.46135	0.433097
																	0.244371	0.19705	0.233393	0.211569	0.184317	0.223878	0.160107	0.149558	0.143051	0.151794	0.139644	0.117124	0.160832	0.157634	0.150576	0.143826	0.140873	0.136226	0.142648	0.1475	0.132952	0.126323	0.118605	0.124662	0.128382	0.135962	0.114854	0.120722	0.11731	0.132912	0.123302	0.122186	0.138109
																		0.517985	0.484365	0.482788	0.524324	0.51743	0.546025			0.550613	0.529413	0.533147		0.578079			0.574278	0.595846	0.581269	0.59679		0.620482	0.671289		0.614683	0.627078			0.613139	0.613244	0.606556	0.607145	0.582888
																		0.48703	0.397249	0.403215	0.426123	0.342775	0.378807		0.350806	0.375209	0.371419	0.375105		0.376782		0.381597	0.375028	0.378741	0.384419	0.399194	0.413541	0.426164		0.411719	0.402703		0.434937	0.405357	0.401295	0.432563	0.410887	0.424697
																			0.546122	0.632475	0.822139	0.628463	0.579313	0.672004	0.714709		0.627738	0.542968		0.521555	0.625524	0.585	0.617532	0.568275	0.528929		0.634581	0.501524	0.498141	0.538227	0.516164	0.5759	0.56246	0.554971	0.524738	0.513425	0.505898	0.577419	0.497136
																			0.295941	0.299932	0.297837	0.268687	0.301019	0.267574	0.288344	0.242955				0.284631			0.272679	0.288833	0.287026	0.26194	0.272412	0.2765	0.260653	0.26765	0.279325	0.274113	0.272911	0.300445	0.300843	0.325513	0.328056	0.321949	0.306268
																				0.367414	0.294101	0.324615	0.227211	0.20476			0.233914		0.204104			0.220129	0.232466	0.229845	0.247497				0.218608		0.229175	0.212835		0.210189			0.226985	0.225916	0.230416
																					0.572788	0.49064	0.47766		0.461371	0.438844	0.405881		0.399502	0.393713			0.421895		0.419025	0.417807	0.437364	0.471387	0.442922			0.470333		0.493343		0.500534	0.5128	0.509747	0.513757
																					0.448258	0.452677	0.430944	0.462668	0.467884	0.473096	0.471769	0.467343	0.519314	0.505039					0.580401	0.562719	0.619904	0.601512	0.619502		0.568428	0.622842	0.648441	0.65268			0.712538	0.696741	0.741181
																						0.51886	0.539964	0.498767			0.520965	0.50516	0.469517	0.471852	0.461723	0.450025	0.470364	0.47236	0.470956	0.4736	0.508548	0.525371	0.529855	0.514373	0.517247	0.4987	0.521549	0.517945	0.552249	0.560621	0.573546	0.590715	0.590592
																						0.337345	0.320134	0.290106	0.290396	0.262364	0.265268	0.260676	0.262466	0.23957	0.242593	0.220897		0.201302	0.202054	0.222119	0.204954		0.251453	0.246737	0.233639		0.29049	0.27346		0.300177
																						1.04103	1.05666	1.09073				1.07594							0.453867		0.335821	0.352273	0.336934	0.299662	0.313789		0.313104	0.307779	0.287857				0.254386
																						0.414486	0.430689	0.470675	0.398805	0.390976	0.376321	0.372139	0.369662	0.349417	0.341807	0.333153	0.337229	0.341359	0.350765	0.358504	0.351208		0.372869	0.369065	0.335621		0.340794	0.326154			0.348014	0.350863	0.352655
																							0.338171	0.296843	0.29221		0.289939	0.330838	0.352341		0.295032		0.354747	0.351419	0.362721	0.352926	0.33327	0.327322		0.335257	0.32817	0.355857	0.329464	0.343532	0.339238	0.338484	0.339826	0.36739	0.346004
																							0.880945	0.942396	0.806861	0.694493	0.828294	0.630368	0.735886	0.922583	0.828967	0.444789	0.646027	0.59754	0.797287	0.483223			0.689779	0.557698	0.45591	0.477138	0.475597	0.497279	0.563999	0.541059	0.584909	0.612688	0.464787
																							0.512805	0.424657	0.345003		0.437647	0.386957	0.386417	0.391259	0.387613	0.401417		0.45313	0.47004	0.495825	0.502191	0.481918	0.48775	0.494479	0.522096	0.515054	0.520898			0.597477	0.602594	0.617157	0.636415
																							0.697967	0.683294	0.669592	0.680278	0.737287	0.785893	0.75704	0.823595	0.792434	0.786872	0.775157	0.78823	0.811803	0.774185	0.793055	0.818898	0.837537	0.855056	0.86792	0.83959	0.832612				0.93019	0.966671	0.949227
																							0.340398	0.396096	0.352639	0.387268	0.352251	0.344654	0.349778	0.318295	0.335006	0.338968	0.340696	0.334533	0.313682	0.328256	0.3268	0.329883	0.324895	0.329698	0.312488	0.31596	0.30974	0.301232	0.285799	0.280163		0.29937	0.304642
																								0.50675	0.443072	0.427048	0.391973	0.405733	0.39031	0.395295		0.419648			0.392186	0.349363	0.355445	0.366894	0.355573		0.339675	0.334885	0.313778	0.337577	0.328409	0.342273	0.332932	0.331738
																								0.717114	0.631198	0.597609	0.627432	0.579599		0.522954	0.548119			0.535951	0.502832	0.523666					0.55456	0.598506				0.604499		0.633713
																								0.351422	0.466011	0.354877	0.389238	0.355073	0.321294	0.410502	0.35147		0.316853				0.315935		0.318327	0.304696	0.306129	0.292096	0.287379	0.296791	0.299011	0.299782	0.311044
																									0.790696	0.935563	0.874331	0.981555	0.943087	0.952271	0.912568		0.829463	0.842554	0.835055	0.866808		0.936047	0.938085	0.880719	0.803908	0.819243	0.78348	0.792797		0.819987	0.802324	0.787684	0.829793
																									0.37936	0.361624	0.511065	0.408709	0.420766	0.409593		0.44595	0.518228	0.478078	0.525032	0.522061	0.530357	0.546764					0.595821	0.60932	0.613653	0.601037	0.602983	0.625574	0.530665
																										1.31313	1.27076	1.18852		1.09216	1.30669			1.21028	1.08391		1.00223	1.0807	0.833899	1.02747	0.907186	0.88514	0.823642	0.703318	0.752354	0.659643	0.595126	0.783775	0.633205
																										0.635644	0.777181	0.287326	0.330181	0.373206	0.287132	0.364745	0.404924	0.326088	0.388599	0.316289	0.32938	0.34366	0.315606	0.326803	0.300265	0.274616	0.307105	0.281869	0.2726	0.277935	0.371724	0.263478	0.260514
																										0.66628	0.63747	0.521101	0.477731	0.4617	0.464888	0.449805	0.397313	0.373035	0.362495	0.338636	0.331529	0.334716	0.329216	0.342236	0.33923	0.333997	0.344571	0.353946	0.352302	0.346225	0.321789	0.32125	0.330998
																										0.39342	0.430272	0.403692	0.429175	0.42914	0.392258	0.390738		0.367401	0.357032	0.371974	0.362237	0.350633			0.357597	0.412255	0.353761		0.404583	0.410543	0.383834
																										0.477859	0.489904	0.45797	0.462678	0.410901	0.415418	0.367905		0.411396	0.391124	0.412658	0.397329	0.398462	0.404858	0.415322	0.443381	0.391394	0.414477	0.447282		0.411507	0.423357	0.413628	0.411515
																										0.529316	0.45545	0.571094	0.504119	0.385334	0.407745	0.537897	0.47708	0.423758		0.401556	0.347215	0.370794					0.613281	0.523575	0.542074	0.432593		0.490145
																										0.521513	0.464245	0.517109		0.472267	0.584605	0.491127	0.43036		0.508981		0.597757	0.556243	0.572503		0.416882	0.5051			0.543107	0.406733	0.400265
																											0.947518	0.83807	0.753857	0.890046	0.781483	0.860976	0.761016	0.791799	0.787039	0.803974	0.799567	0.827543	0.909561	0.866541	0.886908	0.922848	0.956011	0.89689	0.90506	0.91432	0.95947		0.96526
																											0.572549	0.493255	0.523495	0.605077		0.448437	0.48985	0.548049	0.491821	0.452444	0.567673		0.507408		0.60963	0.632334	0.460367	0.536462		0.676506		0.463109	0.430793
																											0.240558	0.231628	0.24594	0.267831	0.21655		0.343453	0.267739	0.270518		0.311503		0.288531	0.287797	0.298128	0.291281	0.288681	0.292159	0.306651	0.305265	0.310749	0.309479	0.314037
																											0.248465	0.261585	0.249956	0.233405	0.23409	0.229749	0.234846	0.250934	0.232727		0.238845			0.26372	0.246977		0.256206	0.265503		0.247987	0.271095
																											0.417335	0.382232	0.380409	0.375692	0.363225	0.39409					0.397511	0.387108	0.38678	0.37412	0.369122		0.380429	0.448727			0.414391	0.431446	0.424969
																												0.289204	0.353169	0.324329	0.278805	0.274146	0.297659			0.259935		0.22804	0.324242		0.286838	0.289105	0.407247	0.401192	0.312016	0.377289	0.376645	1.22736	0.348804
																												0.589471	0.565969	0.521904	0.524511			0.560751			0.580605	0.567581		0.615828		0.570667	0.581796	0.628851	0.595587	0.605079	0.60725	0.602297	0.599635
																												1.59995	1.62343	1.53208	1.67201	1.64398						0.729563	0.789022		0.719515		0.69083	0.716903	0.723036	0.748269	0.686817	0.7746	0.714432
																													0.262992	0.266458	0.271392	0.281427	0.288184		0.296604	0.294558			0.285467	0.266983	0.286142	0.300969	0.329421	0.318743	0.412695	0.464826	0.479383	0.505146	2.87366
																													0.466296	0.394848	0.384911	0.326505	0.365843	0.419481	0.391317	0.410935	0.417534	0.381611	0.427159	0.407412			0.40584		0.459197	0.435425	0.427838	0.435905
																													0.472493	0.403699	0.393376			0.360776	0.390552	0.404328	0.367091	0.404445	0.434358	0.391376	0.412985	0.422224	0.407071		0.414848		0.431177	0.436541
																													0.603565	0.523366	0.446301	0.461841	0.408989	0.393917		0.402633	0.488099	0.428629		0.400321	0.421439	0.408573	0.422519	0.386017		0.404865	0.364758		0.357743
																													0.721833	0.711103	0.558902	0.556717	0.620184	0.587207	0.714437	0.638033	0.456353	0.560797	0.541735		0.495924	0.575279	0.447976	0.669643			0.477692		0.455564
																													0.841566	0.820117	0.802149	0.863785			0.880532		0.748052	0.743464			0.598347	0.586068	0.580823	0.582998		0.576941	0.561409
																													0.486215	0.689228	1.50414			0.693484			0.333503			0.299734		0.299281	0.272178	0.274723		0.313671	0.293416	0.324366	0.311819
																													0.343666	0.357988	0.379676	0.354894	0.360795	0.390429	0.387502	0.386676	0.37025	0.37006	0.444274	0.384328	0.376647	0.448795	0.450423	0.385629	0.478476		0.409783	0.484592	0.471586
																													0.754655	0.91595	0.839403		0.921873	0.926327		0.904798	0.81658	0.793178									0.393662	0.405164	0.424743
																														0.493566	0.405503	0.411578	0.398887		0.375934	0.351651	0.367837	0.346493	0.358214	0.344066	0.357124	0.343226	0.363786	0.384387	0.393873	0.335157	0.377568	0.375615	0.372775
																														0.953459	0.86182	1.02456	1.05967	0.987611	1.00229	0.601567	1.24183	0.809439	0.981964	1.1495	1.40009	1.24142	1.20795	1.32307	1.23508	1.65727	1.44766	1.65452	1.426
																														0.483551	0.509493	0.507494	0.497911	0.490464	0.498513	0.487215	0.522848	0.549835	0.511734	0.509891	0.489623	0.485244	0.535436	0.497303	0.471554	0.462658		0.459856	0.477974
																														0.778518	0.862899	0.969579	1.00437		0.843343	0.909362	0.92256	0.760394		0.818988	0.814282	0.822464	0.82092	0.856994	0.636754	0.663756			0.571272
																														0.503435	0.497966	0.514547	0.593137	0.525756		0.497881
																														0.286112	0.297854	0.197238	0.275466	0.243486		0.242947	0.226315	0.229898			0.247105	0.24408	0.241397			0.26351			0.28721
																														0.211609	0.190809	0.263492	0.17558	0.165594	0.236151		0.206897	0.213289	0.21136	0.214311	0.214922	0.204494	0.18681	0.200678	0.187764	0.197208	0.228841	0.205976	0.210094
																															0.228513	0.373616	0.264361	0.338802	0.22663	0.204961	0.23093	0.264764	0.233545	0.236439	0.405514	0.224633	0.22535	0.220943	0.22223	0.230077	0.240136	0.236149	0.235416
																															0.900011	0.712444	0.612479		0.56506	0.533075	0.49144	0.62403	0.520627	0.830396	0.498991	0.620407	0.578004	0.588199		0.522329	0.52768	0.710945	0.778033
																															0.689949	0.562009	0.596166			0.52505	0.600856	0.612763	0.550038	0.579703	0.544112	0.578419		0.556346				0.573194	0.562371
																															0.331137	0.327145	0.415537	0.395632	0.396956		0.321328	0.286159	0.291142	0.297569	0.29325	0.284838	0.287846		0.303739	0.287944	0.288414	0.297646	0.322709
																															0.753644	0.882319	0.982253	0.821812	0.837922	0.959491	0.823293	0.876729	0.888994	0.838744	0.906326	0.88374	0.801054	0.834189	0.83695	0.84832	0.873903
																															0.535899	0.755694	0.505415	0.434251	0.38164	0.392474	0.422903	0.366874	0.367965		0.383446		0.383893	0.450383	0.377784	0.356486	0.355317	0.384773	0.410162
																															0.594802	0.516377	0.756957		0.55712	0.531415	0.453656	0.404252	0.553931	0.411372		0.466379	0.601283	0.501383	0.46878	0.538569	0.652667	0.599285	0.677626
																															0.719905	0.654795	0.704269	0.69973	0.69889		0.776875				0.643524	0.646361	0.646388	0.64017	0.643417		0.635767
																																0.477522	0.490303	0.533828	0.505534	0.480393	0.473003	0.507714	0.488051	0.506776	0.503009		0.467353	0.473329
																																1.28396	1.20908	1.36202				1.53112	1.6901	1.52965	1.50798	1.62717	1.64966	1.37204	1.59538	1.62344	1.68346	1.72631	1.64312
																																0.183683	0.173465	0.175019	0.178183	0.174864	0.165655			0.191431			0.16789	0.143742	0.143253	0.143146			0.144048
																																	0.634639	0.627051	0.783397	0.641859	0.711862	0.611765	0.558481	0.639454	0.602752	0.545446	0.575399	0.583145	0.575332	0.563654	0.553925	0.549894	0.531699
																																	0.427057	0.465446	0.40992		0.411637	0.358591	0.397312		0.383335	0.389076	0.467009			0.359084	0.378111	0.359331
																																		0.455129	0.406054	0.408948	0.481169		0.383439	0.399102		0.414601		0.429141		0.438361		0.427633	0.406839
																																		0.633576	0.662542	0.665095	0.622776	0.634303	0.692038	0.655849	0.642079	0.635357	0.643175	0.608934	0.619987	0.694549	0.611507		0.608773
																																		0.516897	0.476828	0.40661	0.397201	0.435216	0.41813	0.418575	0.415256	0.411987	0.426123	0.424607		0.415092	0.42435	0.439116	0.434273
																																		0.809617	0.690541	0.718793	0.653021	0.687151		0.762908		0.731225	0.684814	0.728066			0.866802	0.740916	0.671766
																																		0.329287	0.329032	0.346395	0.345806	0.36187	0.353202	0.358638	0.34522	0.346069	0.346998		0.335533	0.320567	0.31396
																																		0.701265	0.676328	1.06395		0.339614			0.228401	0.286777	0.199479	0.211841	0.24315	0.215493	0.228677	0.273227
																																		0.295365	0.358826	0.418017	0.373782	0.338786	0.25724	0.287628	0.293181		0.270031			0.217898
																																			0.43101	0.383722	0.397219		0.370166			0.385659	0.397551		0.378342	0.36712	0.49543	0.411024
																																			0.829868	0.746045	0.832272	0.860294		0.673687	0.784803	0.725701	0.766983	0.708067	0.716634	0.772592	0.734699		0.761115
																																			0.497623	0.442326	0.464952	0.574404	0.494341	0.560111	0.540425	0.576358		0.57554	0.480604	0.507846	0.474039		0.491407
																																				0.754775	0.753841	0.831604		0.716674	0.727577			0.743072	0.743624	0.748314	0.71845	0.801796	0.73298
																																				0.443549	0.446285	0.484646	0.518864	0.473869	0.502628		0.468497	0.490063	0.484244		0.536104	0.535458	0.533718
																																				0.37219	0.425315	0.414654	0.372852	0.376827			0.386676		0.474471		0.365525	0.395993
																																				0.808196	0.95724	0.917949	0.850932	0.908836	0.945514	0.926228	0.846621		1.06485	0.871791	0.850854		0.898665
																																					0.514385	0.509183	0.385339	0.471383	0.438195	0.451715	0.423041		0.408256	0.348811	0.334584	0.315435	0.340788
																																					0.576026	0.329876	0.345457	0.390462	0.319106	0.331644		0.269147	0.305379	0.337881	0.32402	0.281894	0.328091
																																					1.8602	2.03237
																																					0.458996	0.335098	0.435635	0.530808	0.420629	0.388479	0.433008	0.416983	0.398337	0.522105	0.394757	0.486554	0.512704
																																						0.603784	0.707133	0.929409	0.947783	1.08671	0.442992	0.34693	0.349686	0.357772	0.685244	0.328658
																																						0.376337				0.357522	0.351865	0.355103	0.360956	0.399077	0.377038	0.400693	0.418264
																																						0.261989	0.287648	0.281258	0.268896		0.269957	0.233971			0.226104		0.345965
																																							0.814284	0.862066	0.767974	0.771331			0.758135	0.73456	0.794155	0.840442	0.809744
																																								1.14391	1.56475	1.3737	1.088			1.18739		1.2633	1.17382
																																								0.314903	0.294503	0.295382	0.282002				0.315146
																																								0.446993	0.506007	0.40157	0.466474					0.378948	0.457571
																																								0.716023	0.582479	0.642197	0.601723	0.713745	0.674631	0.676054	0.730631		0.700504
																																								0.596402	0.650308	0.606849		0.611197	0.619758	0.623976	0.694851	0.61777	0.617257
																																									0.563881	0.482469	0.544466	0.548661	0.510116	0.533264	0.570413	0.466429	0.486896
																																									2.08386	2.12194	2.12101	2.03681	1.89712	1.92609			2.06272
																																									0.67408	0.681737	0.689307	0.686878		0.731725	0.734333	0.731628
																																									1.5931	0.951916	1.44574	1.29063	0.839608	0.888173			1.22716
																																											0.654248	0.618572	0.600886	0.601597	0.628464	0.615716
																																											0.486107	0.525148	0.658889		0.605472	0.525261	0.535874
																																											0.634992	0.730047	0.571693	0.667242	0.584101	0.544615	0.545681
																																												0.43526	0.505115	0.513746
																																												0.503892	0.471297	0.439201	0.457964
																																													0.207575	0.212983	0.2353		0.235984
																																														2.45415	2.3022	2.40033	2.2581
																																														1.28527	1.15065	0.938632
																																														0.589998	0.580741	0.593177	0.617832
																																																	0.438952
																																																	0.386871

Treated with: 0.0005xEAA
Replicate 1, Treated at time point 36
0.45474	0.450287	0.432897	0.419994	0.441484	0.396349	0.399691	0.459297	0.416488	0.390897		0.354643	0.580949	0.540944	0.445337	0.573861		0.478335			0.409429	0.383025	0.427194	0.389416	0.399483		0.517043	0.425379	0.481418	0.527076			0.434964	0.440404	0.446537	0.47443			0.548109	0.501878	0.492158	0.468306	0.472428	0.463544	0.468545	0.529709	0.493838	0.481036	0.504811	0.468265
0.550144	0.566298	0.528819				0.537307	0.553304	0.629777	0.466969	0.516497	0.52438	0.45924	0.567843	0.739989		0.675862		0.602279	0.775198	0.62336	0.578705	0.540405	0.589199	0.651114	0.638144		0.670092	0.659903	0.736112	0.672496	0.649579	0.671739	0.598504	0.655961	0.725405	0.681147	0.780415		0.819897	0.817964	0.906577	0.759302	0.827513		0.822206	0.858271		0.871888	0.87585
0.761867	0.732204	0.708573	0.634753	0.708231	0.65883	0.660459	0.683759	0.563888	0.562463	0.604921	0.612295	0.633749	0.606702	0.782363	0.753665	0.725773	0.616853	0.569086	0.56469	0.516299	0.489476	0.450156	0.452155	0.418368	0.384189	0.364982	0.333704	0.353909	0.353206	0.337979	0.359136	0.344078	0.300792	0.298259	0.281574	0.279754	0.285642	0.261871	0.257608	0.273198	0.272146	0.294766	0.30619	0.314722	0.308569	0.307782	0.301089	0.351081	0.298169
0.361035	0.320589	0.353794	0.353843	0.323671	0.333362	0.339985		0.321968	0.315334	0.370683	0.338971	0.303638	0.327442	0.343018		0.29142	0.273983	0.289654	0.261764	0.270748	0.254307	0.244257	0.258185	0.244857	0.226278	0.225557	0.235185	0.24631	0.243358	0.240967	0.227264	0.230438	0.252163	0.247925	0.240103	0.26555	0.27058	0.275667	0.279079	0.286945	0.281646	0.287505	0.298405	0.314142	0.328971	0.331357	0.338426	0.332191	0.332574
0.31529	0.299508	0.290611	0.313527	0.341496	0.334149	0.329675	0.44829		0.340588								0.612687			0.411254	0.318258	0.338433	0.322453	0.319183	0.321122	0.308848	0.324635	0.329925	0.374606	0.337589	0.338034	0.345937	0.34445	0.336095	0.338726	0.337188	0.370557	0.367289	0.388104	0.390213	0.390351		0.376256	0.38132	0.378927		0.347161	0.327546	0.342791
0.949799	1.01023	0.941747	1.07339				0.501514	0.572143	0.507224	0.430739			0.418373			0.383691	0.46711		0.328913	0.321783	0.312836	0.336395	0.349576		0.3154	0.359613	0.310617	0.304637	0.361348	0.392925	0.385843	0.390508	0.390016	0.387719	0.394867	0.396944	0.417182	0.443547	0.482492	0.42388	0.473359	0.468925	0.416098	0.463248	0.478373	0.485932	0.503201	0.419555	0.426327
0.856162	0.900775	0.91285	1.03043	1.06175																0.451073	0.439227			0.603113	0.662203	0.659899	0.600892	0.761146		1.15729	0.995539	1.08873	0.888772	0.914772			0.99217	1.06948	1.12087	1.08151	1.20459	1.14796	1.07369	0.906101	1.158	1.15703	1.18884	1.22272	1.18851
0.464139	0.474441	0.495472	0.511439	0.50657			0.538583	0.52048	0.605461										0.658993		0.66718	0.609489	0.60204		0.670371	0.629415		0.596372	0.487198	0.532303	0.452279	0.443755	0.465835	0.511661	0.474655	0.512358	0.539326	0.583211			0.641634			0.682213	0.746574	0.736389	0.742411	0.793278
0.242471	0.287171	0.264887			0.280345		0.286821		0.359306		0.323552		0.290326		0.371129	0.491844	0.339949	0.31803	0.412289	0.359201		0.371213	0.38862	0.40765	0.478317	0.507249	0.463432	0.470656		0.404394	0.406958	0.383099	0.396277	0.379285	0.40175	0.405381	0.465295	0.485948	0.440803	0.449969	0.402412	0.402363	0.46248	0.40783	0.413918	0.454639	0.473057	0.544102
0.368893	0.364387	0.372682	0.379018	0.357746		0.35145	0.352947	0.367647		0.46626	0.399012		0.385537	0.363623	0.312785	0.315854	0.295969	0.287804	0.291875	0.287138	0.287808	0.280101	0.269923	0.276299	0.280399	0.275005	0.282974	0.294057	0.285638	0.289505	0.30443	0.281588	0.27805	0.279736	0.280541	0.291507	0.296218	0.302021	0.297203	0.312622	0.297988	0.298069	0.30844		0.295708	0.30086	0.306452	0.302438	0.312538
0.292535	0.316283	0.320214	0.331788	0.375796	0.359578	0.337725	0.37029	0.533938		0.536012								0.454133			0.516849	0.463078			0.431484	0.473668		0.687775	0.475072		0.452414	0.377305	0.391364		0.351616	0.343667	0.337214	0.372529	0.411464	0.327195	0.34213	0.336177	0.334875	0.337041	0.388454		0.360057	0.36408	0.391692
2.7583	1.94361	2.08126	1.65097	2.17741	1.73469	1.93268		2.53302		2.99662										0.439734	0.416405	0.379617			0.576456				0.388822			0.480435					0.524637	0.573316	0.517791			0.519247	0.463269		0.485842		0.424018		0.424605
0.251402	0.255998	0.198014	0.223704	0.258453	0.211507	0.184269	0.182042						0.160743	0.168071	0.185618	0.177355	0.190218	0.192039	0.181547	0.184068	0.178739	0.158886	0.141897	0.154869	0.150325	0.149646	0.147118	0.14281	0.137469	0.145149	0.151497	0.143143	0.140722	0.132156	0.136375	0.131258	0.140407	0.138221	0.152903	0.146168	0.155835	0.149155	0.14462	0.142446	0.140048	0.139619	0.166975	0.167554	0.182851
0.572532	0.523635	0.492034		0.455707	0.471383	0.456117	0.447189	0.462516	0.485606	0.426457	0.438526	0.431481	0.45337	0.432408	0.394879	0.350623	0.342512			0.322974			0.304932	0.283598					0.260455	0.243296			0.251413				0.270346	0.264208	0.288417		0.280773	0.273329	0.300177		0.346579	0.334739	0.330155	0.360852	0.373508
0.447536	0.437443	0.451074	0.433813		0.451077	0.469314	0.486354	0.48992	0.450294	0.43168		0.441525	0.483128	0.486648		0.448143						0.590209	0.567708	0.566603	0.583509		0.531809		0.579238	0.521009	0.542326		0.542831	0.570841		0.592465	0.604608	0.63939	0.648686	0.636293	0.642673	0.60852	0.601103	0.584493	0.604702	0.572846		0.60031	0.648992
1.23328	1.12087	1.10285			1.30649	1.05722	1.47708	1.18958	1.41823						2.1869	2.34755	2.62688	2.77973	2.54408	2.10919		3.23626		3.866	3.67841	3.77656												2.76712		2.90437						2.61029	2.72454	2.26631	2.7672
0.155573	0.16501	0.139607					0.212685					0.205733	0.214608	0.207778	0.222846	0.207622	0.194146	0.196409	0.205156	0.197965	0.20471	0.175822			0.113908			0.128266	0.118156	0.11014	0.143287		0.157644	0.507444			0.695823	0.738988	0.71797	0.747352	0.815972	0.710159	0.624933		0.645407	0.686762	0.699702		0.66063
0.997894	1.19349	0.811019	0.82762	0.910479				0.931455	0.873515		1.03649				0.802533					0.939397	0.557291	0.654931	0.650445						0.32581	0.473596	0.362558	0.326357	0.314079			0.365278	0.381374	0.426743	0.435806	0.458237	0.475365	0.489524		0.538549	0.593842	0.613467		0.670992	0.658102
0.434021	0.426811	0.469396	0.432118				2.14937	2.0608	1.99748						2.0256		1.84651	1.8138	1.7458			1.5481		0.587171	0.581607	0.607728	0.551433			0.511184	0.603075	0.534946	0.585137	0.535646		1.70785	0.670574	0.63736	0.635124	0.62348	0.619246	0.638007	0.576708	0.570258	0.595362	0.578118	0.595867	0.590177	0.635885
0.303145	0.381825	0.346328		0.320269														0.427991	0.391241	0.363443	0.524084	0.357432	0.350621	0.36083	0.398463	0.376217					0.358944			0.445769	0.373166		0.478151	0.472309		0.398832	0.40327	0.373517			0.493204	0.403583	0.40186	0.372341
0.343894	0.346644	0.349869	0.326553	0.363278			0.353532	0.34144	0.379427	0.360103				0.357307	0.338555		0.329549		0.319794	0.331969	0.35717		0.40627		0.42004	0.429463	0.437153			0.485965		0.66233		1.06561		0.658471	0.795845	0.822061	0.71328				0.981205	0.818645	0.781354	0.80786
0.763013	0.868958	0.840518	0.815109	0.921429	0.920506	1.04371														0.826041		0.761755	0.784617	0.822147	0.836134	0.882837	0.885053	0.87603	0.831584	0.838628	0.787219	0.80118	0.821898	0.802537	0.776676	0.789614		0.808606		0.809118		0.742337	0.731937	0.690501		0.707249
0.314265	0.331693	0.326964	0.342007	0.365261																	0.389935	0.362178	0.345187		0.353767		0.343146		0.335155		0.37573	0.336711			0.281051	0.29361	0.295575	0.308384	0.298266	0.277424		0.261329	0.257342	0.267814	0.253226	0.258893			0.276661
0.3763	0.471236	0.463104																							0.412062	0.621735	0.388833	0.407622	0.420325	0.431743	0.455309	0.464015	0.456995		0.478693	0.504064		0.436419	0.473002		0.472402	0.496698	0.51178	0.509765	0.467454	0.457702	0.475089	0.495125	0.46874
0.288589	0.316424	0.328581			0.283233	0.299031	0.303773	0.33981		0.306724				0.265049			0.254473	0.259794	0.254983	0.247465	0.282526	0.258175		0.260384	0.289378	0.317759	0.297241	0.320792	0.317213	0.299525	0.305489		0.296072	0.313321		0.281439					0.318664	0.331913
0.722065	0.655418	0.675229																						0.654083	0.708562	0.663307	0.661269	0.688072	0.697086	0.714395	0.709512	0.706337	0.596514	0.619215	0.529568	0.623471		0.530707		0.554403	0.570307	0.561372	0.569017	0.593923				0.651367
0.685226	0.8105	0.834919	0.784632	0.846253	0.767175			0.899039							0.838859		0.618554	0.582135	0.534348	0.485409		0.417551	0.411492	0.381876		0.341418	0.317362		0.340166		0.325699	0.338271				0.349463				0.469507	0.448045		0.436813	0.468665	0.531756	0.465333	0.499181		0.501813
	0.908745	1.22012	0.587683	0.912576	1.02191	0.524355	0.611513	0.622927	0.673682		0.561654			0.492787	0.476128	0.511076	0.543794			0.629024	0.686798		0.841023	0.837833		0.849901	0.799778	0.819919	0.812292	0.801954	0.786922	0.780698	0.774734	0.761573		0.863185	0.797119	0.764149		0.799601	0.736902	0.807773	0.79699	0.754611	0.814991	0.816225	0.826349	0.935646	0.906509
	0.424195	0.396358	0.436887	0.418333		0.402001			0.472058	0.43126							0.416655			0.145381	0.110418	0.099727	0.140432	0.158822	0.194123															0.411022			0.471129	0.367046		0.328648		0.377732	0.340272
																														0.836452	0.739459		0.77721	0.900112	0.870791	0.95133	0.95217	0.843874		0.971462	0.941938	0.945626	0.988566		0.965994		1.13989	1.07365	1.13077
	0.313101	0.38689	0.350954	0.342882	0.354383		0.545878	0.469096	0.705892	0.481965						0.577871	0.52632		0.487295	0.475218	0.479627	0.488283	0.441617	0.524464	0.476647	0.474453	0.468215	0.541303	0.552434		0.667784	0.788502		1.12477	0.72896	0.662568	0.621921	0.561489		0.39551							0.534192
	0.760401	0.953305	0.929268	0.903524												0.925889				1.20491		0.899761	0.766759		0.726988		0.813218						0.877481		0.974205		1.16187	1.23626	1.39555	1.11552		0.934925			1.20944	1.24634	1.29776	1.21971
	0.411667	0.392213	0.495647		0.414548	0.407624	0.403087	0.421262	0.456576		0.505526	0.529272					0.410633	0.37737		0.379488	0.36765			0.357419	0.420131	0.387194	0.376266		0.374633	0.38732								0.457114		0.432318	0.397022							0.418946
	1.05957		1.03548	0.938367		1.07473	1.15327	1.07655													1.23326	1.70884	1.50611	1.07209	1.0392	0.923264	0.874752	0.723909	0.713434	0.574459	0.848915		0.904971	0.924467	1.03765	1.15248			1.84396			2.20554	1.52416	1.41601	1.45915	1.49639	1.4191	1.41148	1.3663
	0.499274	0.463908	0.461105	0.490631	0.509074	0.59607	0.513373	0.619436										1.01404	0.71456		0.656886		0.586635	0.685394	0.488069	0.424107	0.479825	0.447697	0.489966	0.466878	0.467164	0.482047		0.40796	0.426668	0.467175	0.494412	0.558708	0.482879	0.597804	0.563863	0.601923	0.62902	0.574196	0.589573	0.558049	0.570007	0.873476	0.842204
	0.324205	0.35153	0.357266	0.34374	0.456346																	1.06377		0.958254	1.1785	1.09341				0.792356	0.908291	0.949212	0.944708		0.818748		0.823302	0.781304	0.957567	0.814471	0.84147	0.722878	0.806203	0.743272		0.711629	0.688657	0.701563	0.703496
	0.298648	0.325284	0.384	0.359015		0.364539				0.567875	0.46005								0.351304	0.228967	0.252039	0.487045		0.289483	0.225336	0.209901	0.205115	0.201232	0.193601		0.184356	0.175489	0.174453		0.179868	0.18196	0.194259			0.198568	0.206554		0.214052			0.221123	0.230595	0.227309	0.231759
	0.560159	0.54296	0.641087			0.614378			0.601056								0.635884	0.569203	0.621646			0.716376		0.659434	0.695488	0.598282	0.563698							0.621434		0.671028	0.658894	0.673176	0.682525		0.769258	0.78722	0.664914	0.866545		0.816232	0.802879	0.860937
	0.513794	0.513659	0.55158	0.480398	0.483385	0.528439	0.448436	0.517888	0.411221					0.545184				0.412062	0.393513	0.525651		0.40125	0.47452	0.550582	0.514429	0.456946	0.474407	0.493923	0.518398			0.50564	0.507394	0.530345	0.526229		0.583127	0.597656					0.823912	0.696587	0.598512	0.729092	0.877134		0.677024
		0.478619	0.500061	0.633332	0.562313			0.624832									0.949086	0.527457		0.505631	0.541081	0.428245	0.411938	0.416122	0.437279	0.439042	0.447351	0.435205	0.43356	0.438993		0.458996	0.479364	0.501021		0.525847	0.548174	0.580126	0.584738	0.573529	0.555011	0.571528	0.580077	0.579663	0.598121	0.610546	0.622621	0.630305	0.645451
		2.39625	2.59427	2.50889	2.28615		2.53659															1.83763					3.098			3.5907	3.05253	2.74189	2.37359	2.86474	2.51278	3.17878	2.7472	3.54084	3.09605	2.92483	2.98984		3.1559	3.07885	3.18669	3.38045	3.62209		3.39232
		0.232852	0.21731	0.231948	0.260408		0.326435	0.343674	0.28349			0.289389		0.302699	0.37353	0.312952		0.254926	0.238557		0.217549	0.259149	0.240743	0.232893	0.258011	0.263246		0.262772	0.252318	0.244923	0.255657		0.230308	0.224278	0.239798	0.260084		0.267739	0.281477	0.279024	0.282897	0.290169		0.310555	0.315813	0.325924		0.317459
		0.39253	0.379938	0.404519	0.398128		0.390667	0.376434	0.352446	0.419475	0.450252	0.433085			0.426859	0.415923			0.410802	0.436871			0.480095	0.474086	0.618699					0.428319	0.545712	0.439237	0.426537	0.467354	0.472109	0.506569		0.521512			0.518759	0.488047	0.430829	0.455692					0.630189
		0.318925	0.381689	0.473643																					0.4035	0.46121	0.474579	0.582096	0.487417	0.47563		0.475974	0.474239		0.427895	0.468722	0.399758	0.395461	0.417591	0.424433	0.39777	0.45886	0.41611		0.421863	0.42797	0.428262	0.425589	0.445744
		0.460781	0.569189	0.545187	0.58205			0.59305										0.495369	0.435614	0.384479	0.388864	0.346384	0.33866	0.361154		0.332373					0.30612	0.296295		0.291369			0.281543	0.306378		0.329889	0.29639	0.294888	0.289759		0.282781	0.284986	0.282328	0.262431	0.274566
		0.509449	0.504838	0.488238					0.475657				0.464695	0.51134	0.476084			0.410211		0.366084	0.347147				0.388004		0.389786				0.373929	0.411821	0.411124		0.470518	0.489112		0.573185		0.617358		0.652483	0.690837	0.623103	0.611821	0.753608	0.686791	0.648709
				0.985302	0.899074	1.03902	1.09268	1.0409	1.09037	1.12749		1.18103	1.16164		1.00385	1.02655	1.00481		0.914312	0.954591	0.914499	0.966732	1.01525	1.08227	1.11092	1.14104	1.26374	1.42956	1.47873	1.46881													2.02411	1.98788	2.09274	1.8001	1.94715	1.73733	1.69764
		0.525471	0.563016	0.762382	0.62312	0.609519	0.562144																			0.838303	0.970298	0.849801	1.08718	0.825095		0.780156	0.915434	0.853371	0.894016		1.24455	1.29232	1.29561	1.26483	1.31557	1.11142		1.06381	1.10105	1.10353	1.18979	1.0123	1.01487
		0.61452	0.544689	0.536293		0.57889		0.558586	0.619274	0.589659	0.752095	0.715262	0.83899	0.751812	0.619495	0.503908	0.825046	0.738357		1.0978	1.01482	1.1635	1.15436	1.27999	1.21609	1.30465	1.32513	1.3046		1.29678	1.3667	1.37048		1.34591	1.63858	1.79844			1.50078	0.78269		0.618538	0.622697	0.603364	0.625004	0.642516	0.663353	0.668606
		0.401084	0.443923	0.447497	0.415259	0.439116	0.436007				0.407799	0.475382			0.415747	0.407019			0.361664	0.324446	0.316768				0.341241			0.350924	0.364013	0.368883			0.420356			0.44747	0.512438	0.503005	0.53617	0.569593	0.567263			0.548823	0.588644		0.569735	0.576012	0.605341
			0.71761	0.870561	0.805824					0.759966	0.785941				0.797425	0.782653		0.776357	0.810545	0.715692		0.63588	0.641106	0.727113	0.64842				0.62852	0.680482	0.711689	0.698965			0.725982	0.774377	1.30999	1.24026		0.871083	0.796832	0.798783	0.860532	0.885105	0.871955	0.861475	0.879845	0.879111	0.954611
			0.536719	0.562744	0.564827	0.63934	0.687856	0.629659	0.662914	0.619578	0.668416	0.59871	0.622037		0.807807	0.99498	1.38347	1.63646	0.684353	0.721886		0.51541	0.500158	0.195333	0.45685			0.970519	0.91723								0.694496		0.659608	0.626493	0.585804				0.531155	0.53357		0.539061	0.542544
				1.41535																0.794081	0.807425	0.747621	0.822712			0.739452		0.668488	0.630511	0.709508	0.618835							0.606232		0.550334		0.579032	0.56429			0.517126		0.599913
			0.71275	0.653284	0.688833			0.686266	0.639026								0.49088		0.356468	0.422432	0.315901		0.430148	0.472928		0.5096	0.5123								0.556672	0.593358	0.729178	0.726425	0.737963	0.744699	0.760511						0.806411
				0.413551	0.408404	0.42255	0.413378	0.454166										0.482314	0.441572		0.425061	0.445786	0.464997												0.764762	0.680322	0.676491	0.659831	0.674319		0.628153	0.582933	0.548254	0.573895		0.529153	0.54724	0.529034	0.528322
				0.36777	0.444029	0.487237	0.489317	0.508117	0.48737	0.455424	0.337481	0.445125		0.415235	0.31491				0.260018			0.272607		0.230646		0.243759	0.255486		0.262781	0.252091	0.250963	0.255283	0.2707	0.253781		0.242536	0.260056	0.274763	0.289462	0.28536					0.328842		0.408044		0.492066
				0.648572	0.614246	0.871229	0.744213	0.936139	0.884355	0.697705	0.686232	0.665588	0.621012	0.66453	0.649098	0.636983	0.567629	0.612328	0.578488	0.532105	0.544593	0.58198	0.693329	0.666885	0.720027		0.66946	0.703562	0.681077	0.676738	0.734535	0.6998	0.712367		0.725136		0.760294	0.762786	0.801556		0.7365	0.767333	0.768496			0.784716		0.785882	0.763463
				0.160805	0.159459	0.161205	0.164086	0.178126	0.204666	0.206477	0.214245	0.202538	0.311933	0.231002	0.215616	0.221664					0.18084		0.196273	0.193126	0.194965				0.215153					0.200746			0.224298	0.235769	0.232616	0.236719	0.233761						0.215489
				0.522517	0.626088	0.548656			0.526864	0.526792								0.568011	0.572594		0.638707	0.564943	0.568793	0.574311	0.654303	0.619311	0.667188					0.796915	0.858139	0.86485	0.808502						0.804329	0.804616	0.784693	0.752824	0.756268	0.767038	0.748409	0.749537	0.751027
				0.379902	0.373057	0.362252	0.375872		0.370615	0.34498	0.35833		0.401474	0.315597	0.29991	0.318354		0.273762		0.25323	0.292225		0.277792	0.257865		0.249608	0.249696	0.258734	0.259932	0.239128			0.21658	0.225276	0.238653		0.26456	0.272623	0.308497	0.307946	0.303278			0.278456	0.296746	0.275739		0.31375	0.330948
																																				0.694151	0.65477	0.697015			0.646398	0.592839		0.700743	0.643974	0.718836	0.595161	0.667285	0.622524
						0.62632	0.597551	0.743325		0.692297	0.581609	0.646944				0.524385		0.486651	0.567965	0.694058	0.643176	0.664326	0.642305		0.621404	0.590513		0.682991	0.585992	0.570898	0.599607				0.571889				0.628304	0.646986			0.715357
							0.593201	0.554516	0.616379	0.563364	0.709892	0.587444	0.597709		0.498823		0.498243	0.525484	0.500994	0.504452	0.538717	0.49965	0.641655	0.472174	0.477893	0.486113	0.511777	0.489861	0.460595	0.472506	0.474886	0.468059	0.536175	0.511139	0.529433	0.557488	0.586071	0.588898	0.621023	0.642563	0.60938	0.61436	0.569185	0.602926	0.569573	0.574191	0.625306	0.576238	0.622099
							1.20713	1.19128	1.15334	1.15891	1.88902	1.28484	0.807899	0.781269	0.661529	0.620019	0.614288	0.568369	0.613057	0.564565	0.596829	0.633604	0.590883	0.627502	0.621014	0.535836	0.617452	0.543511	0.629395	0.644946	0.672517	0.638664	0.707833	0.677614	0.699083	0.812669	0.786226	0.814005	0.86326		1.00475	1.30084	0.881052		0.821303		0.616705	0.533869	0.472533
							0.464555	0.448835	0.533676		0.415549	0.410086					0.610745	0.41375	0.397138	0.432065	0.368987	0.395933	0.395693	0.407979	0.382408	0.407012	0.39495	0.407345	0.405492	0.387909	0.377003		0.456647	0.49347	0.392178	0.379431	0.394076	0.404645		0.379109	0.38994	0.38467	0.392204	0.579396		0.397729			0.433652
								0.805519	1.35957	4.57046		2.06326	3.08322	2.21511			0.466417	0.482975	0.483556		1.21974	1.05278	0.799062	0.748113	0.651132	0.592361	0.574015	0.569699	0.591378	0.58373	0.571058	0.608115	0.591677	0.583139	0.601533	0.590456	0.548943	0.530177	0.539214	0.541004		0.540631		0.537266		0.572327	0.583076	0.576973	0.71356
								0.515408	0.539229	0.551525		0.63691		0.731856	0.610756	0.626067							0.386074	0.397139	0.312033		0.376822	0.352301	0.371735	0.381859	0.381743	0.37871	0.370349	0.386699	0.366216	0.384159		0.454489		0.475444	0.471892	0.445204	0.456718	0.447313	0.439985		0.425375	0.414141
								0.554137	0.537583	0.607115		0.515182		0.490511	0.519029	0.586242	0.565891	0.59092	0.575698	0.567727	0.591588	0.559803		0.616046	0.594233		0.651962	0.677105	0.731317	0.794227	0.921216	0.777827		0.796592	0.744909	0.742005	0.800265	0.83874		0.825129			0.761989		0.870477		0.885939	0.854566	0.876534
										0.665254	0.670436	0.621038	0.634695	0.672221	0.676956		0.667859		0.590247	0.626528	0.601855	0.61302	0.608518		0.615385	0.668356		0.73262		0.833097	0.873797	0.898878	0.917093	0.921862	0.946254	0.96715	0.931374	1.0312	1.10875	1.14263	1.11703	1.09255	1.14713	1.17052	1.21164	1.21152	1.22044	1.23715	1.31976
										0.198384	0.20448	0.182561	0.170341	0.182953	0.187122	0.173907		0.170744	0.179381	0.166631					0.149281		0.162846	0.18825		0.21622	0.20445				0.176306		0.191151	0.180497		0.193534	0.215583	0.208713		0.245306	0.240548	0.249431		0.2089
										0.320407	0.312952	0.366912	0.377882		0.377049			0.401334		0.401998	0.462535	0.483439		0.421468	0.447886	0.436915	0.472457	0.511694		0.568523	0.524779	0.509232	0.554594	0.533094	0.598235			0.574664		0.609429	0.702346	0.66175	0.6262	0.615115	0.684253	0.595969	0.734877	0.680524
											0.244002	0.235547	0.247688	0.255619	0.238544				0.251301		0.280345	0.278223	0.268086	0.269431	0.262788	0.269693	0.254358		0.270689	0.253057	0.245036	0.261847	0.24512	0.249047			0.26077	0.290178	0.293956	0.270043	0.293401	0.302093	0.267898	0.26279	0.262832	0.26679	0.278912
																0.386091	0.412536	0.274886	0.268223	0.280344	0.266288		0.363168	0.416072	0.410813		0.383758	0.272293		0.242576		0.244073		0.256681	0.255329	0.275585	0.262272		0.271668	0.289878	0.33877	0.355151	0.349464	0.336615	0.278321	0.277744	0.315447	0.258228
																0.369404	0.251202	0.316577	0.242562	0.235054		0.2141	0.216298	0.200437		0.217968						0.25495				0.249122		0.279873				0.259845	0.269516	0.264915	0.269301		0.284074
																0.464089	0.250972	0.248818	0.251689		0.182777	0.188577	0.176266	0.156322	0.151361	0.160204	0.159988	0.153412	0.147419	0.144614	0.145494	0.15283		0.173163	0.180906		0.197763					0.244193	0.26032	0.267398	0.260674		0.262358	0.267113	0.28564
																	2.26103	1.73567	1.04039		0.81821		0.456832	0.40016			0.377455	0.372168		0.414281	0.378254	0.494763		0.566628	0.650015	0.749349	0.554218	0.534764	0.551596	0.574339	0.500235	0.63429	0.598357	0.694965	0.699575	0.772253	0.679283		0.795119
																	0.673071	0.683205	0.615811	0.703122	0.75475	0.62892	0.634263		0.639521	0.636871								0.666534		0.729876	0.756431	0.829696	0.814367	0.811641	0.799438	0.817442	0.812292		0.787242	0.814474			0.779555
																		0.562741	0.498029	0.495498				0.487633	0.473055								0.69419		0.798433	0.732426			0.696674		0.76644		0.807776	0.818007	0.676421	0.748797	0.777939	0.767684	0.757537
																			0.450843	0.43419	0.406463	0.355649	0.302739	0.326052	0.359618	0.34603	0.36589	0.374148	0.350581	0.369017	0.366293	0.353597	0.35583	0.349459	0.350271	0.345258	0.338557	0.347734	0.360929	0.362752	0.374621	0.346413	0.3361	0.347068	0.340495	0.318684	0.315779	0.320321
																			0.822389	0.791606	0.671469		0.617987		0.680928	0.691434	0.686104	0.786667	0.739797	0.763877		0.749948			0.732043	0.723957	0.788196		0.86258	0.960021	0.861622		0.857226	0.791917	0.820763	0.822586	0.870394	0.868691	0.930029
																			0.704167	0.617145	0.624808	0.651856	0.653319		0.673553	0.639501		0.652662	0.678481	0.673546	0.734232	0.717326	0.693569	0.697921	0.734232	0.729211	0.742486	0.770321	0.776817	0.753302	0.740199	0.779442	0.768694	0.769166	0.756644	0.760896	0.761782	0.780707	0.77773
																			0.539639	0.617016	0.523623	0.511381	0.506822	0.461941	0.449737		0.46841			0.434815			0.479932		0.484126	0.49992		0.543868	0.592145						0.592108		0.616576	0.659098
																				0.803432	0.847888	0.577048				0.695859	0.595817	0.591005	0.606029	0.701129	0.619231	0.62121	0.618763	0.624497	0.68755	0.680255	0.731592	0.766373	0.760454	0.743382	0.719736	0.771151	0.719743	0.742158	0.731374	0.791413	0.756756	0.729037	0.750629
																				0.763944	0.635937	0.858333			0.657001	0.704985	0.723586	0.902679		0.700255		0.776622		0.643791	0.619478	0.620771	0.634644											0.772006	0.937255
																					0.447273	0.662617	0.433118	0.72742		0.40238	0.447396	0.45073	0.469205	0.477351	0.500691	0.519486	0.542023	0.530164	0.602916	0.524519	0.510068		0.668154	0.639079	0.582318	0.605013	0.591336	0.528684	0.671807	0.664077		0.554807	0.493689
																					0.437127	0.622726	0.38496	0.361962	0.357809			0.326975	0.319887			0.318831	0.315633					0.329558	0.32536	0.321567	0.316926		0.321968		0.307076		0.306546	0.309275	0.32599
																					1.02267	1.07308	1.01285	1.00854	1.07786		1.18657				1.11273		1.27356	1.20165		1.20841		1.2508	1.40168	1.38131	1.32957	1.3963	1.40675	1.42247	1.41884	1.46785	1.43502	1.38053	1.46793
																					0.347865	0.377061	0.358637	0.378534	0.353791	0.366206	0.341077		0.325535	0.31536	0.316363	0.314851		0.289064	0.301682	0.28145	0.303921	0.314373	0.329139	0.318602	0.336095	0.349283	0.363172	0.354952	0.34724	0.363764	0.356938	0.357911	0.366432
																					1.05557	1.13562	1.15282	1.18751						0.541477			0.440149	0.540725	0.68341			0.782726	1.14126	0.741414	0.780061		0.751443	0.742512	0.774232	0.786251	0.765945	0.789129	0.786371
																					0.332854	0.309396	0.322009	0.330115	0.342689	0.343304			0.346251	0.348342					0.40631			0.468357	0.468932					0.486661
																						0.578605	0.617175	0.552311	0.584105		0.565208	0.614823	0.60506	0.621136	0.719828	0.693622	0.717883	0.711377	0.764449	0.773979	0.754972	0.788631	0.840007			0.804469	0.783382	0.804108	0.8151	0.808449		0.797187
																						0.523607	0.440269	0.441561	0.456115		0.432729		0.41466	0.391772	0.388814		0.3475	0.329962	0.359114	0.366269	0.330997			0.354503			0.332219	0.329899	0.33065	0.314964	0.330344		0.401006
																							0.775746	0.61386	0.56357	0.568038	0.630794	0.729094	0.57628	0.530925		0.498591	0.468428	0.506451	0.468494	0.506737	0.491361	0.498374	0.483972	0.460372	0.408475	0.402428	0.392283	0.394873	0.412746	0.40965	0.40819	0.363496	0.371865
																							0.442366	0.539836	0.569987	0.456513	0.493707	0.663485	0.519458	0.499214	0.488974		0.554351			0.573149		0.423785			0.393569	0.381051	0.357133		0.381946		0.395321	0.382481	0.35227
																												1.03841	1.04248	1.11759		1.17385	1.21764	1.3293	1.28598	1.22819		1.11673	1.26172	1.33622	1.131	1.13325	1.2383	1.32959	1.25678	1.27522	1.31604	1.45285	1.40955
																							0.73217	0.647131	0.679175			0.696557	0.71222		0.891616	0.802679		0.843481	0.778787	0.773479		1.03591	0.949901		1.0218	0.986237		0.861674	0.860583	0.898325	0.970177		0.965419
																							0.61245	0.675228	0.590339	0.572773	0.508377	0.529083	0.539643	0.562516	0.574363	0.569351	0.585328	0.591032				0.670285	0.698773			0.657539		0.691988	0.775139		0.809252	0.815823	0.890273
																							0.469932	0.623966	0.570206	0.602614	0.514038	0.498941	0.519731	0.539504	0.4901	0.514199		0.455762	0.43853	0.439079	0.485831	0.471325		0.481081			0.548743		0.561247		0.495515		0.549216
																								0.541456	0.570419	0.548736	0.542522	0.550485	0.617879	0.628711		0.625312	0.621142	0.612052	0.625311	0.623914	0.617347	0.643753	0.70225	0.697704		0.654165	0.622246	0.646299	0.633066	0.620063	0.653569	0.702198	0.72348
																								0.325543	0.520736	0.353955	0.346154	0.33942	0.364969	0.294648		0.306169	0.292773	0.288817	0.28415		0.29294	0.273731	0.253823	0.253434			0.23091	0.226164	0.216697		0.207304	0.201908	0.207878
																								0.504723	0.554892	0.477562	0.483164	0.524425	0.491509	0.494585		0.503525	0.515655	0.51248	0.522818	0.507534	0.528767			0.557785	0.570946	0.575531	0.56636	0.587871	0.579141		0.582872	0.582513	0.574497
																									0.339805	0.285703	0.299571	0.313957			0.278704	0.275516	0.269254	0.247066	0.250254	0.263627	0.263382	0.256036	0.247981	0.260447	0.268294	0.253394	0.233492	0.239893	0.23404	0.208957	0.216367	0.206103	0.21673
																									0.668935	0.699937	0.709104	0.72853	0.690559	0.707694	0.740788		0.709827	0.774722	0.823175	0.701642	0.74225	0.738929	0.793079	0.63291	0.691795	0.7287	0.754189	0.587484	0.686218	0.685046	0.593672	0.584277	0.606196
																									0.363786	0.378165	0.470952	0.3896	0.403855	0.417991	0.40104	0.399891	0.420992	0.407671	0.3926	0.465722	0.44431		0.470441	0.44587	0.44645				0.454492	0.459525	0.492186	0.472699	0.500739
																									0.190614	0.21938	0.20499	0.217423	0.209468	0.217863			0.215645			0.222026	0.235994	0.263654	0.242903	0.219016		0.216256	0.204255		0.211126	0.214626	0.205353		0.191621
																									0.534193	0.55026	0.565606	0.572049	0.567727				0.565837		0.568751	0.564545		0.567933			0.568382	0.568406		0.566315			0.569809	0.573212
																										1.10774	1.12205	1.17697	1.07618	1.26876		1.38704	1.36972	1.39357	1.45621	1.35492	1.63029	1.62627	1.74652	1.46603	1.53453	1.63019	1.75187	1.63655	1.68588	1.79345	1.6541	1.71202	1.88005
																										0.568453	0.50603	0.5353	0.535145	0.543207	0.531869	0.53067	0.608943	0.552805	0.534398	0.542026	0.580519	0.610561	0.614426	0.636937	0.674394	0.617047	0.632993	0.635019	0.635679	0.643624	0.631278	0.631599	0.648489
																										0.41779	0.501365	0.434087			0.46523	0.485858	0.516814		0.527814		0.520588		0.543769		0.544306		0.583358	0.558276	0.631741	0.588036	0.64318
																											0.425293	0.35757	0.38294	0.364426	0.337187	0.383164	0.333876		0.330509		0.349026	0.349426	0.352114	0.359303	0.349602	0.34042	0.350334	0.370057	0.382078	0.375919	0.354925	0.35568	0.373911
																											0.515312	0.410298	0.480877	0.405759			0.430584	0.399964	0.426119	0.462913	0.480265	0.550361	0.520343	0.526108	0.544243	0.518388	0.506013	0.494762	0.498469	0.501659	0.517426		0.581126
																											0.523173	0.38687	0.386125	0.406593	0.337392	0.326443	0.395069	0.368867	0.680787						0.70731	0.393497	0.577641	0.551066	0.429008	0.494287	0.428926	0.499936	0.443154
																											0.384486	0.425279	0.381071	0.414481	0.417698	0.388477	0.381647	0.352793	0.372856	0.365977	0.41622			0.47902		0.460063	0.462376	0.465645			0.506047		0.488616
																											0.375345	0.384728	0.379862		0.353423			0.345906	0.338139	0.313426	0.335858	0.337753	0.392691	0.32549							0.313571	0.397329
																													0.379481	0.479176	0.322089	0.313922	0.434313	0.391097			0.34796	0.372172	0.374767	0.352427	0.375734	0.319727	0.323274	0.302866	0.298406	0.303909	0.310331	0.315774	0.322013
																													0.845425	0.888221	0.814169	0.754701	0.762834	0.671855	0.599908	0.800675	0.43656	0.468714	0.898506		0.857461	0.832432	0.656778	0.787166	0.692504	0.801477	0.79734		0.777507
																													1.48202		1.3782	1.37702					1.53982	1.75675	1.61135	1.43785		1.58613	1.49255	1.62607		1.50565	1.64699		1.71826
																													1.28507	1.77354	1.06095	0.880004			0.88938					1.76164	1.60327	1.48553	1.34027	1.27646	1.29056	1.15321	1.18021	1.11726
																													0.408079	0.388763	0.388788	0.463958	0.472041	0.536717	0.527197	0.527225	0.548529	0.611646	0.668441			0.594209	0.575059	0.633617	0.649005	0.629306		0.629476	0.592588
																														0.717333	0.603829	0.674832	0.669265		0.697813			0.810915	0.748463	0.829929	0.755918	0.783314	0.741087		0.725145		0.758534	0.756357	0.80896
																														0.483543	0.426131	0.491548			0.414354	0.4101	0.421762	0.405272	0.465749	0.477899	0.504089	0.467494	0.500736			0.500839	0.487867	0.49839	0.496238
																														0.849396	0.755345	0.705683	0.739611	0.711247	0.741859	0.818578	0.723609	0.73023	0.743746	0.731104	0.671651		0.661551	0.675625	0.668264	0.667306	0.728135	0.687098	0.671109
																															0.450599	0.481023	0.423812	0.444616			0.453169	0.536895		0.545594	0.475438	0.488668	0.469089	0.454677	0.456863	0.454789	0.471202	0.486881	0.51639
																															0.406638	0.391647	0.420428	0.411467		0.425605			0.508674			0.434226		0.607255			0.515856		0.546257
																																0.529057	0.599085	0.503645	0.504363	0.492287	0.498743	0.538708	0.557043	0.58085	0.554306	0.557755	0.548219	0.573185	0.561761	0.56166		0.54809	0.524035
																																0.83778	0.80763	0.93095				0.987142	0.948091	0.902903	1.03232	0.865113		0.914331		0.969149	0.82628		1.01288
																																0.458347	0.537192			0.352895	0.390964	0.355358		0.385374		0.416943	0.378855			0.475886	0.38938
																																0.438276	0.474162	0.463474	0.504074	0.51964	0.538768	0.532929	0.554111			0.556669		0.539907	0.534855			0.519702	0.52441
																																	2.08015	1.94556	1.3065	2.62935	2.62077	2.12212	3.20017	2.98556	2.32414	2.81548	2.65511	2.63119	3.13567	2.78464	2.594	3.00274	2.8926
																																	0.745185	0.63202	0.712549	0.589759	0.405106	0.543325	0.407949	0.455103	0.45374	0.430252	0.442367	0.400238	0.347027	0.374282	0.316072		0.263968
																																	0.778619	0.792071	0.813644	0.767134
																																	0.852566	0.881354	0.899547			1.04954	1.06338	1.2452	1.22347			1.1357		1.1489	1.21882		1.11441
																																		0.444791	0.383026	0.45753	0.391264	0.4174	0.453487		0.482034	0.460189	0.495809	0.487835		0.487051	0.510248	0.49053	0.568162
																																		0.382253	0.400355	0.507875	0.406222	0.389264	0.391239	0.39992	0.39757	0.374858	0.385257		0.379217	0.415924	0.401087		0.428223
																																			0.424057	0.432417	0.482354	0.505804		0.561046	0.575105		0.655152	0.686744	0.639468	0.542614	0.568999	0.579018	0.534843
																																			0.426909	0.49462	0.49934	0.537432	0.508441	0.54011	0.503429	0.534629	0.571088	0.603369	0.622554	0.66468	0.658499	0.669483
																																			0.699812	0.702036	0.713796		0.801214	0.850623	0.866581	0.771595	0.835617	0.75636	0.853845			0.89691	0.860137
																																				1.01459	1.0726	1.13809	1.17923	1.10785	1.11318	1.09813		1.32205			1.44863	1.45176	1.53325
																																				1.24716	1.19686	1.35263	1.3557	1.30977		1.26891		1.27019		1.34013	1.32704	1.38404	1.35701
																																				0.381055	0.370993	0.368995	0.383569	0.372717			0.376467		0.381994		0.381288	0.377205	0.387539
																																				0.495133	0.505089	0.544554			0.601221	0.534277		0.499784	0.546688	0.490928	0.44763	0.33331	0.378452
																																					0.824071	0.849819	0.830383	0.802888	0.809875	0.886854	0.808346	0.814602	0.89084	0.878832	0.91965	0.864384	0.857565
																																					0.477566	0.558753	0.547885	0.574756	0.529175		0.554265	0.60038	0.58386	0.624887		0.673085	0.645777
																																					0.787178	0.730311	0.793143		0.775101	0.780659	0.796285	0.761251	0.758197			0.761844	0.735515
																																					2.88498	2.77081	2.57959		3.23759	3.14134	3.38712	3.04934	2.79921	3.36213			2.99873
																																						1.09521	1.22251	1.0595		1.33896	1.3013		1.14786	1.2341		1.45402
																																						0.622515	0.541932	0.632963	0.5842	0.651251	0.658434		0.624848	0.739266	0.610983	0.659195
																																							0.78652	0.921436	0.814411		0.810941		0.837571		0.831072	0.845662
																																							4.23708		4.81062	3.44381	4.86469	4.41782	2.71702	3.72407	2.74578		3.12977
																																							1.59911		1.41495	1.43587					1.75538
																																								0.482748	0.536575	0.444984		0.370113			0.379183	0.379712	0.389696
																																								0.429206	0.525338	0.508513	0.549857	0.549628	0.613078	0.512561	0.539874		0.539018
																																								0.640722	0.63079	0.574312	0.60408	0.610376	0.614888	0.610769	0.596464	0.576019	0.608342
																																								0.437665	0.441467	0.448826	0.517339	0.487265	0.536804	0.55095		0.616406	0.715739
																																								0.488052	0.469682	0.506308		0.542424				0.586499
																																									0.791831	0.807725	0.840137	0.873422	0.993834	0.83455	0.870725	0.847942	0.890256
																																										0.598618	0.6087	0.619786	0.582788	0.516772			0.489597
																																										0.338353	0.350858	0.318089	0.315805	0.36709	0.331059	0.354395
																																										1.1862	1.18846	1.24547		1.2583	1.16617	1.1403	1.10394
																																											3.59921	3.22581	3.43745	3.28072		3.3721	3.25115
																																											1.78443	1.8108	1.82873	1.78314	1.83476	1.66672	1.93539
																																											0.347692	0.340493	0.372272	0.372334	0.34684	0.341792	0.332368
																																												0.888718	0.924609	0.845277	0.871662	0.830857	0.911764
																																												0.693877	0.660918	0.625856	0.694062	0.636357	0.649243
																																													0.448198	0.396159	0.488151	0.510364
																																														0.819478	0.874356	0.866827
																																														0.82962	0.867039	0.916565	0.872184
																																														1.89032	1.72973	1.96113	2.05133
																																															0.609929	0.60762	0.621958
																																																0.852322	0.767118
																																																1.13086	1.16358

0.263496	0.24416	0.269753	0.277022	0.273814	0.315482	0.306423	0.326307	0.342498	0.371146	0.414785	0.373972	0.394867	0.49277	0.43136	0.422028	0.364521	0.449604	0.337861	0.311463	0.337635	0.518179			0.535327		0.45306		0.488	0.50246		0.469982	0.465383	0.439009	0.432307	0.420258	0.428999	0.394351	0.40101	0.409499	0.417716	0.446303	0.438427	0.474559	0.491771	0.438706	0.415936	0.394502	0.441061	0.459264
3.21039	3.4647	2.86838	2.55564	2.7909	2.24035	1.97764		2.57284	1.77652	2.13999	2.0176	2.07494	2.03032	1.80895	1.79448	1.55676	1.72323	1.53488	1.54942	1.53182	1.36029	1.47554	1.62313	1.50435	0.729846		0.615593		0.475565	0.510931	0.417437	0.370759	0.377984	0.353047	0.361269	0.363883	0.377776	0.389013	0.410306	0.429361	0.401601	0.4119		0.405967	0.413379		0.4046		0.399165
0.20594	0.25096	0.26311		0.353261	0.435017	0.557755	0.580799	0.483876	0.588122										1.31872	1.03071	0.831724	1.17027	1.25416	0.564455	0.564591	0.461362	0.451584	0.491758	0.460233	0.462555	0.529844	0.516778	0.539355	0.483916	0.455671	0.426231	0.500282	0.552185	0.533158	0.539675	0.515594	0.49567		0.49516	0.484857	0.483612	0.475203	0.465978	0.489749
3.23039	3.50299	3.6752	3.60789	4.53097	3.55585	3.76585								2.78223
0.319338	0.329514	0.427055	0.363124	0.34949	0.378424						0.410326			0.397267	0.401939	0.452993	0.402075	0.455103	0.451031	0.440138	0.454	0.438307	0.456816	0.446901	0.451571	0.448404			0.445001	0.43451						0.46767			0.573287	0.603867	0.522859		0.537119		0.506682	0.530617	0.552738	0.555057
0.369784	0.362004	0.361592	0.363319	0.381351	0.358245	0.353134	0.380503	0.341586		0.312416		0.310866	0.374305	0.334787	0.393265	0.424566	0.360692		0.347201	0.352586	0.359531	0.333861	0.310794	0.390448	0.256112	0.317739	0.309478	0.322344	0.304554	0.316198	0.338797	0.338018		0.364604	0.348625	0.339622	0.338807	0.402314	0.373394	0.395575	0.398039	0.396122	0.406519	0.388603	0.41185	0.414399	0.444889	0.463533	0.49423
0.712471	0.683921	0.791739	0.790499																	0.744139			0.736955			0.861047	0.803055	0.825085							0.906652		0.781956	0.847945	0.861942	0.838742	0.793049	0.828871	0.859135	0.919257	0.904952	0.901368	0.917384	0.927529	0.965076
0.24685	0.263421	0.243879	0.244898			0.49655	0.398166			0.247413		0.329214				0.213005		0.269008		0.230458	0.213194	0.27431	0.214005	0.18736	0.298211	0.20639	0.201727	0.227305	0.1903	0.19986		0.198595		0.201571	0.192106	0.205014	0.212456			0.235251	0.225199	0.240214	0.250553		0.247695		0.26091	0.272275	0.269363
1.23626	1.28931	1.04833	1.2418	1.40545	1.07052	1.14016	0.967935	1.07247	1.06503	0.994581		1.06693	1.08832	1.06165	1.07137	1.05762			1.10014		1.28232		1.15966	1.35423	1.18132	1.59953	1.42583		1.27661	1.25248	1.32003	1.2367	1.32463	1.08763	1.15219	1.12336	0.713347	0.82643		0.738077	0.718192	0.677175			0.637146	0.630796	0.678626	0.645213	0.659103
0.264909	0.412775	0.374099																											0.549268	0.546298	0.546462	0.528625	0.529814	0.531839	0.501983	0.5021	0.498779			0.491675		0.457761	0.458243	0.454839	0.471644	0.462755	0.470659	0.459256	0.469179
0.128871	0.13791	0.119923	0.1326	0.157266				0.25164	0.240212	0.192198				0.343913	0.382745		0.277067	0.234214	0.303742	0.254597	0.246105	0.290275			0.253999	0.216366	0.241683	0.246615	0.248558	0.282431	0.325146	0.260987		0.280013	0.26873	0.286141	0.273104	0.299097	0.323308	0.29579	0.32209	0.322895		0.319575	0.315751	0.334524	0.343401
		0.755716		1.02249																							1.59776	1.56752		1.47398	1.56374	1.73089	1.67339	1.51383	1.60861	1.66241				1.71801				1.40421	1.4819	1.41161	1.55833	1.38235	1.45802
0.263532	0.326107	0.300172	0.299331	0.366876	0.350322																					0.429348	0.326591	0.363454			0.411675	0.270229		0.404326	0.302151		0.269386	0.345839	0.347086	0.366565	0.333001	0.335392	0.286428			0.327178	0.33415	0.273256	0.335669
0.530553	0.549501	0.611193	0.636022																0.42084	0.412855	0.377872	0.396595	0.35457	0.373041		0.375965	0.385486	0.372181	0.394641	0.400794	0.409277		0.396445	0.413017	0.441473	0.408858	0.42627	0.42681	0.472269	0.432292		0.490372	0.506941	0.499226	0.429159		0.438864	0.44584	0.430463
0.368451	0.299834	0.242126		0.201328	0.208143		0.194698	0.197591			0.210574					0.23618	0.285967	0.305121	0.373324	0.252546			0.350967	0.300774		0.379499	0.31427	0.136234	0.215902	0.235682	0.395277		0.334569	0.217984	0.18279	0.288865	0.151089	0.203658	0.172993	0.294818	0.261295	0.176713	0.251279	0.0721094	0.169192	0.071175	0.184946	0.240904	0.476339
0.555229	0.614799	0.547577	0.672856	0.534222		0.438454	0.55296										0.561584	0.550076	0.472984	0.444664	0.420604	0.415584		0.46817		0.475225	0.452843	0.459144	0.460584	0.434944	0.461133	0.486235	0.450173		0.492701		0.458286	0.462988		0.45327	0.423494	0.4176	0.420911	0.41098	0.405172			0.3669	0.381944
0.398845	0.44915	0.444764		0.526522		0.600031													0.690788									0.727233		0.667231	0.687414	0.714575	0.673901	0.797039			0.749147			0.766749	0.693592	0.753061	0.793421	0.708181	0.718863	0.77199	0.743514	0.759517	0.778567
0.792633	0.830818	0.960058	0.855754	0.871883	1.00327		0.925103		0.855305	0.800675	0.943277	1.08773	1.09694	1.26556	1.23074	0.941654	1.25152	1.01804	0.83876	0.93645	0.876699				0.812498		0.804066	1.1134	0.82983	0.859893		0.679765	0.679759	0.66415	0.559542	0.566219	0.58646	0.640073	0.671317	0.691479	0.772424	0.664404	0.783713	0.699312	0.708858	0.872173	0.590489		0.56271
0.195761	0.184795	0.221902	0.181347	0.226294	0.233934	0.261941	0.262188	0.350597	0.294629	0.303729	0.294934	0.32957	0.307766	0.367316	0.333314	0.508412	0.439709			0.894877	0.842404	0.787496	0.725479	0.625474	0.631812	0.685653	0.72808	0.729295	0.714821		0.742661	0.725192	0.5948	0.613054		0.781466	0.629245	0.591941	0.591018	0.6051		0.529126	0.508748					0.572666
0.356909	0.329174	0.391425															0.620566	0.313946		0.499666	0.309065	0.307252	0.288696	0.2956	0.308427	0.30993	0.320776		0.328624	0.321389	0.335812	0.326901	0.331712		0.327485		0.318589	0.327879		0.302162	0.291992	0.286624	0.283434	0.288056	0.272181	0.271512		0.294349	0.290294
4.35709	4.61481	4.641	5.04319	4.37321	4.17386	4.04135	4.32441	4.44572		4.17457	4.03741	4.09261		4.47964		4.7933		4.40234	4.83026	5.02133	4.6913		4.37053	4.16948	4.86433	4.63634	5.04492	4.31714	4.69483		2.2417	1.78282	2.82415	2.74256	0.568448	0.441246	0.373454	0.506486	0.457917					0.317034				0.240859	0.239043
0.252908	0.251166	0.283912	0.352043	0.28374		0.30101												0.388988	0.53475	0.312008		0.27683	0.364561	0.312097	0.344212	0.364484	0.369404	0.301088	0.306166		0.273891					0.236871	0.245629	0.280644	0.298852			0.324914	0.339296	0.276609	0.284446		0.337633	0.300967	0.330644
0.450638	0.407462	0.440487	0.449714			0.598766			0.458699											0.46513	0.514865	0.442006	0.470206	0.458643	0.448754	0.494065	0.463446		0.398766	0.370324	0.354484	0.353467				0.333168	0.338366	0.368437	0.39647	0.409393	0.404923		0.422444	0.430326	0.409573		0.401516		0.410541
0.409865	0.468323	0.46062	0.473747	0.404302	0.340916	0.441707											0.36023	0.383335	0.341266	0.345071	0.401155	0.366008				0.378826	0.384632		0.399895			0.399832	0.406421	0.410212	0.405235		0.400389		0.448884	0.433392		0.392273	0.393514	0.389561	0.390417	0.399672	0.38432	0.3934	0.410544
0.340102	0.342193	0.332175	0.344661	0.338827	0.367475	0.393225	0.465507	0.443572	0.473754	0.507677	0.48199	0.496605	0.457563	0.602084		0.578908	0.530761	0.497046	0.449544	0.464438	0.528665	0.42109	0.375711	0.375598	0.395701	0.317011	0.381848	0.336929	0.351458	0.391968	0.399055	0.374412	0.351979	0.341912	0.3362	0.280801	0.317955	0.336878	0.361717	0.363056	0.335874	0.3443	0.357111	0.352978	0.345667	0.33008	0.345936	0.319473	0.332443
0.306814	0.279278	0.352749																							0.363203		0.3618		0.294371	0.295134	0.294553			0.324337	0.290957
0.35731	0.419389	0.353488	0.380302	0.383262	0.417598		1.08593		1.45516				2.09478	2.21093	2.37764	1.28892	1.86686		1.38478	1.22957	1.05791	1.01653	0.697134			0.274754		0.513243	0.28642	0.291723			0.312149	0.32602	0.303216	0.329695			0.367294	0.318828		0.279084					0.313338	0.325905	0.413067
0.402667	0.440477	0.416204	0.571707	0.475087																	0.47306					0.388674			0.430294	0.366993	0.389222	0.386305	0.356897	0.373547	0.358458	0.360131				0.347821	0.367188	0.317453		0.347714	0.345838	0.351363	0.383428	0.364476	0.380024
0.647865	0.640962	0.606093	0.5886	0.581926	0.549129	0.575787		0.539525	0.544522	0.562188		0.476714		0.658303			0.477955	0.435588	0.447882	0.39421	0.462135	0.421773	0.404539	0.469453		0.455695	0.436357	0.440973	0.44991	0.444454		0.435096	0.453648	0.494799	0.434939	0.455931	0.462181	0.481271	0.459287	0.440201	0.391458					0.462763			0.503525
0.380094	0.369909	0.391411	0.413141		0.374102			0.423322										0.58044		0.459232	0.557544	0.368666	0.378177		0.343801					0.357528			0.377538	0.378566	0.349379		0.394731					0.37158	0.384952	0.425802	0.451285	0.493662			0.505338
0.946294	0.909567	0.932885	0.835391	0.839799	0.688266		0.788038	0.740936	0.711943	0.721762	0.757908	0.755933	0.753701	0.710936	0.699377	0.725803	0.702268	0.690314					0.658117	0.648661	0.635116		0.642791	0.64544	0.688387	0.636907			0.63604	0.606986	0.643642	0.595326	0.59525		0.593098	0.604906		0.588565	0.580581	0.569688	0.575098	0.592788	0.562334	0.59184	0.589781
0.349006	0.390019	0.374804	0.388099	0.430453		0.64405	0.527769	0.620617	0.568744	0.534163	0.530214		0.63282					0.668105	0.62261	0.57107	0.553026	0.529793					0.531009				0.594265								0.901447	1.00726	0.86883		0.849058	0.898532	0.885147				1.12363
0.418981	0.406515	0.431919	0.452503		0.471128	0.454561	0.476024			0.490399												0.550035			0.567137			0.550457		0.575978	0.62107	0.563639		0.566957	0.542513	0.532305	0.503567		0.551424	0.50605	0.523832	0.643015	0.541886	0.491703	0.478626	0.520798	0.501777		0.46949
0.312815	0.313208	0.356039	0.29905	0.438637	0.326833										0.575997	0.55626	0.573382	0.590801		0.547351		0.466787		0.442262			0.393807				0.351275	0.356406								0.464958	0.450363	0.44512							0.349298
0.600714	0.670959	0.348069	0.586208	0.226859				0.713978	0.873493	0.9453	1.01683	0.700933	0.747587	0.713607	0.673957	0.604519	0.547144	0.685947	0.755675	0.452115	0.457753	0.608208	0.573309	0.776922	0.543313	0.578	0.578747	0.502661	0.478784	0.612645	0.632503	0.589507	0.599096	0.444229	0.452028	0.509984	0.504899	0.445655	0.494547	0.41039	0.46511	0.448975	0.396476		0.481994	0.456915		0.508215
0.157021	0.157398	0.192401	0.203984	0.218164	0.261304													0.22771	0.300824		0.333652		0.28442		0.243449	0.267898	0.253328	0.249153	0.27939	0.29694	0.336618	0.295754	0.314832	0.313058	0.315862	0.309674	0.307806	0.344026				0.331091	0.403936			0.326573	0.322924	0.30778
0.249505	0.255705	0.315883																	0.230256	0.24695	0.212389	0.234549		0.224484	0.220251		0.235453	0.228382	0.204116	0.215403				0.197847				0.248526							0.248515	0.235815	0.247919	0.266266
0.756624	0.758775	0.792688	0.842249	0.806312	0.817227	0.821473																			0.654737	0.457476	0.476474			0.370483			0.363111	0.401466	0.438719	0.469809		0.471109	0.478563		0.496642	0.457708		0.463514	0.486395	0.521512	0.534373	0.536598	0.550068
	1.11755	1.31748	1.56065		0.918179	0.983127	0.773219		0.704098	0.533982	0.604306	0.575843	0.483883	0.526895	0.391727	0.352778	0.332137	0.392947	0.31741	0.353932	0.309732	0.323279	0.286884	0.302841	0.296078	0.273596	0.285612	0.292228	0.283907	0.282284	0.277013	0.28164	0.28345	0.269843	0.284029	0.270452	0.288533	0.286116	0.328859	0.29714	0.312136	0.29359	0.285374	0.274871	0.293563	0.282304	0.292174	0.295718	0.318355
	0.359135	0.352624	0.357273	0.342269	0.481415	0.362611		0.435994									0.41074		0.3825		0.349322	0.358243	0.321952	0.370317	0.363171	0.356604	0.360223			0.37283	0.397275			0.420035	0.40508	0.410209	0.410117		0.492482	0.500265	0.486234	0.474298	0.482133	0.484036	0.47702	0.470739	0.492051		0.520415
	0.388316	0.428868	0.333527	0.314509		0.46195	0.490464	0.521228	0.672601	0.667176		0.475358	0.36878				0.348355	0.369844	0.363044	0.407013	0.443579	0.500489	0.510137	0.545999	0.583065	0.580351	0.55467	0.588615	0.580055	0.607078	0.587444	0.608267	0.656754	0.612897		0.71096	0.665839	0.80045	0.75607	0.768593	0.681185	0.657239	0.654191	0.622687	0.676702	0.628025	0.593159	0.608454	0.615392
	2.51647	2.83235	2.29261	1.81186	2.01005	2.29473	2.3049	1.85263		2.20575	1.85468	1.94961	1.72623	1.62505	1.69809	1.67751		1.50134	1.54523		2.43879					1.41151	1.59885		1.23497	1.03133	0.934552	0.889732	0.961501	0.955101	1.05354	0.962679	0.957778	0.967953	0.939029	1.03475	0.981648	0.967666	0.877277	0.992086	1.0055	0.877127	0.915984	0.942832	0.894475
		0.956803	0.706839	0.687922		0.816599	0.914903	0.900618									0.910344	0.81164	0.96135	0.979367	1.40881	0.778013		0.613797		0.573589			0.584175										0.666741										0.767501
	0.172792	0.16426	0.154343	0.157899		0.157439		0.186056	0.186086	0.23358			0.29011	0.237623			0.206172	0.277491	0.20474		0.184705	0.16329	0.192103	0.145708	0.165663	0.171376				0.176414		0.19226	0.190454		0.178332		0.17538			0.192582		0.18128	0.158849	0.156659				0.106528	0.116897
	0.707442	0.690181	0.77567	0.724194																0.785746	0.64553	0.883482	0.780286		0.622539	0.887037	0.683012	0.57101	0.638851	1.09671	0.751971	1.10645	1.03512	0.780722	1.9512		0.797564	1.01521	0.896049	0.74481	0.74255	2.73939	2.24417		0.623086		2.29244	0.997455	2.45041
	0.377536	0.378536	0.392873	0.370935		0.343742	0.383853	0.358407	0.340372	0.289972	0.297577	0.265336	0.310695	0.309719	0.278612	0.275481	0.262614	0.270257	0.258812		0.295511	0.286134	0.302467	0.288945	0.295251	0.304097	0.293913		0.319124	0.331955	0.314892	0.321139	0.324719	0.337522		0.340659	0.338166	0.322079	0.336062	0.341035	0.336947	0.324968	0.328555	0.341444	0.337096	0.352106	0.342752	0.35502	0.347896
	0.730175	0.741286	0.824696	0.904414	0.838929		0.826151						0.370549	0.336238	0.307232	0.337518						0.659362	0.891146	0.550047	0.73224	0.86036	0.803357	0.786141	0.89948	0.868904		0.920746		0.869427	0.794683	0.434959	0.682509	0.823275	0.742316	0.559352	0.676035	0.559685	0.688969	0.71511	0.779487	0.677738	0.674402	0.730405	0.613674
	0.671979	0.623402	0.713485
	0.971869	1.02984	1.03416	1.85138	3.15329	2.57654		2.14022	2.0051	2.12746	2.03093			1.76078		1.64428		1.60733			1.75026	1.65747		1.63093	1.58425	1.55188		1.46875	1.45974	1.51937	1.42999	1.4246		1.30344	1.31592	1.10359	1.27272	1.17957	0.997925	1.16502	1.06165	1.34338	0.98681	1.05773				0.603458	0.67396
	0.368548	0.408055	0.404085	0.502576	0.433536			0.387839																0.373194	0.345351	0.366039	0.389698	0.415984	0.390927	0.36081	0.384778	0.335108	0.335492	0.366906	0.337168	0.312812	0.338829	0.366955	0.437294		0.413387	0.403668	0.443222				0.494291
	3.15746	5.15975	5.14823	3.49841	4.95221																	0.250996	0.249665	0.215051	0.217792		0.243318				0.31633	0.338093		0.335319	0.351364		0.375278		0.436706		0.451314	0.525212		0.543712	0.549378	0.539708	0.589423	0.565187
		0.654248	0.488986	0.591508		0.535976	0.497457	0.536796	0.515444	0.4499	0.456036	0.474869			0.42753		0.641163	0.528103	0.63153			0.504241	0.543226	0.650227	0.590004	0.529261	0.486538		0.632214	0.632209		0.482317		0.567704	0.663598	0.49407	0.504344	0.543964	0.54961	0.559643	0.551872	0.526975		0.510777	0.528065	0.529963	0.503402		0.520832
		0.304166	0.297846	0.32344	0.346359	0.390838	0.329311	0.331792	0.4644		0.404929	0.396599	0.393566		0.411598	0.462187	0.43087	0.37941	0.397757	0.42158	0.405687		0.405051	0.41491	0.392299	0.385868	0.365761	0.352129	0.327048	0.313205	0.291479	0.290331	0.27338	0.27926	0.284339	0.287079	0.282156	0.313004	0.317589	0.314744	0.337009	0.325646	0.336126	0.328527	0.334524		0.339653		0.342694
		2.29827	2.59063	2.26324	2.58394		2.86776	2.9682		3.36394		3.27576	3.32585				3.28995			2.94276	2.82899	3.35054				0.171203	0.139935	0.151032	0.150972	0.155884	0.175637	0.161517	0.146074	0.141086	0.145736										0.16872	0.16689	0.183014		0.209069
		0.38742	0.427309	0.441385	0.405222	0.420127	0.477475										0.501959				0.526972	0.565224	0.545563	0.519521		0.547829	0.564554									0.579106	0.475838	0.485238	0.514621	0.498562	0.531711	0.529709	0.63391	0.564632	0.686982	0.675773	0.497924	0.705614	0.750561
		0.611497	0.616404	0.66828	0.673083	0.592814	0.606605	0.648463		0.721295		0.697679				0.605072	0.559468	0.576577	0.63356		0.446357		0.394527	0.35477		0.329868	0.374849			0.375004		0.368865	0.378268	0.366809				0.405453		0.3561	0.368459			0.363588	0.351915	0.361253	0.385977	0.37828	0.381001
			0.514714	0.412813	0.39011					0.409892		0.446402		0.507186	0.535699	0.569605	0.582504		0.501106	0.516059		0.614038	0.634746	0.580559	0.584744	0.570335	0.644822	0.600425	0.562563	0.553683	0.595982	0.558593	0.546412		0.875572	0.776015	0.790987	0.799547	0.868621	0.917031		0.882457	0.834135	0.929199	0.902129		0.892483	0.922899	0.951139
			0.705422	0.689287	0.796104		0.650017	0.709629		0.821852	0.760872	0.882449		0.798672		0.826908	0.814541	0.800927		0.785137	0.892209	0.927309	1.00882	0.987417		1.13933		1.29733	1.34905		1.59211	1.62916	1.71534	1.83227	1.88626			2.10094	2.17054				2.06798	2.11821	2.19744	2.14078		2.19974
			1.43626	1.42477	1.38408	1.39445		1.35019	1.36084		1.28613	1.25677	1.36957		1.30228	1.41643	1.28523	1.37462	1.49091	1.28641	1.46172			1.27717	1.27285	1.22722				1.34112		1.3664		1.34178	1.42763		1.44488	1.40685	1.37075	1.34226	1.50927	1.52043			1.5213		1.57511		1.67935
			0.397279	0.423247	0.526013														0.401032	0.233348		0.24831		0.240536	0.238304		0.231052		0.231132	0.223474	0.209181	0.200572	0.217891	0.201964	0.226155	0.237817	0.253987		0.27149	0.260511		0.282733		0.294454	0.286805	0.301028	0.297031	0.305726	0.316083
				0.421789	0.3898	0.402722	0.394287		0.538525				0.47683			0.540215	0.384089	0.363373	0.304473			0.305209	0.326527	0.29685	0.31168	0.310616	0.333211	0.32146	0.326288	0.299058	0.321548		0.301279	0.313274		0.286437	0.318218	0.314029	0.352595	0.353449		0.315716	0.291143	0.32034	0.301079	0.302635	0.304124	0.307656	0.310111
				0.175113	0.236848	0.218755	0.227552	0.236324	0.253677	0.251031	0.261401	0.291827	0.26577	0.280739		0.34285	0.392807	0.378467	0.42355	0.432435	0.474923		0.527078		0.490569	0.452111	0.483522	0.503942	0.507398	0.510088	0.495259	0.470114	0.523558	0.449771	0.439002	0.466785	0.517657	0.601969	0.676792	0.69507	0.664946	0.677677	0.694132	0.659996	0.660691	0.662769	0.642742	0.657742	0.602591
				1.58965	1.66202	1.38846	1.34692	2.06855										1.06158	1.30489	1.0953				1.32808		1.15199	1.15088	1.12809	1.08185		1.0837	1.23775	1.19953	1.08742			1.16672		1.44171	1.3536	1.80166	1.43425		1.51816	1.50742	1.40068	1.71401	1.52218	1.73405
				3.14829	0.534079	2.96167	0.506085	0.927893	2.77906				2.23949	2.06563		2.36888	3.17375	2.77901	3.21601	4.32768	1.52892	3.09451	5.41204	4.33574	0.932726	4.01342	2.06707		0.400695	0.384901	0.327503		0.360305	0.327107	0.30383	0.305222	0.284722	0.311628	0.301505	0.283308	0.258745	0.225888	0.227944	0.204769	0.201899	0.197236	0.181896	0.16955	0.175689
					0.46047	0.458475	0.451856	0.482383	0.431804	0.425742	0.554357	0.54236	0.552043	0.513998			0.467887		0.453303		0.74926		0.551834		0.885791	0.835414	0.473083	0.472723	0.467996	0.768317	0.500324		0.420957	0.43228	0.431912		0.402885	0.385906	0.36511	0.385408	0.379741	0.375052	0.382721	0.453646	0.500578	0.450106	0.53888	0.519398	0.433945
					0.930927	0.81088	0.842176	0.864852	0.853771		0.871728					0.970006		1.23494	1.25225	1.25874	1.15915	1.2021	1.25493					1.22723	1.25745		1.27264	1.27821	1.36786	1.28823	1.26125	1.13649	1.04177	1.12703	1.10281	1.0464	0.998023	0.973812	0.942349	1.18147	1.0855	1.25565	1.34467		1.52582
					1.58309	1.12745	1.78469	1.52617	1.90428	1.82322	2.35811	2.82648		2.65211		2.60274	2.16131	2.02289	1.82211		1.65619	1.89024	2.13813		2.1277	0.843367		0.602771	0.794558	0.656473		0.697871	0.947256		0.703136	0.723393	0.748537	0.844061		0.878975	0.891658	0.86992	0.849368	0.837554	0.876298	0.873987	0.87733	0.89613
					1.12525	1.15173	1.22841	1.22613	1.20262		1.28999	1.30046				1.14035	1.42347	1.41433	1.26177	1.38591	1.33069	1.2821		1.16813			1.21777		1.00777						0.706208	0.657927	0.683814		0.745007	0.691558	0.705276	0.653364	0.684006	0.683301	0.680764		0.686127	0.669426
						0.545943	0.487832	0.516349	0.462004									0.589361	0.577691			0.606327	0.571634	0.573553			0.592262	1.03429	1.09422		0.866822		0.981399	1.12101	1.08901	0.910129	0.961612			1.26051	0.990721						1.38519		1.25631
						0.284547	0.331838	0.267273	0.312137		0.322316	0.401179	0.449442	0.40234	0.394956	0.452787	0.32378		0.323347		0.318215	0.361026			0.357387	0.370494	0.364488	0.356549		0.361684	0.332191		0.388452	0.452301	0.420557		0.384396	0.407733	0.400942		0.397919	0.420466	0.358295			0.397071	0.398164		0.414841
							0.364129	0.35752	0.351156							0.461182		0.3774	0.327967	0.395851		0.333356	0.325325	0.364825	0.392261	0.38038	0.380641	0.366087	0.403685	0.406604	0.394695	0.411326	0.395492	0.388785	0.385668	0.405027	0.423769	0.443353	0.468288	0.438975	0.406719	0.39687	0.404321	0.405095	0.418224	0.397823	0.386893	0.381477	0.36845
							5.22133	4.50148	5.17833			4.11821	4.19852	3.32897		3.32868	2.94995		2.78507			2.80676							2.01781					2.0276		2.17611
							0.436664	0.436104	0.550054	0.504505	0.496135	0.466419	0.466626		0.493671				0.456716	0.457982		0.41719							0.565017				0.438744	0.438505	0.408078						0.470568							0.35533
								0.20896	0.224279	0.195105	0.25122		0.278941	0.270479	0.264904	0.206067	0.179379	0.268917	0.168619	0.190191		0.169646	0.19135	0.203174	0.198292	0.186594	0.198016				0.181424			0.213086	0.169443		0.231595		0.246713	0.258876	0.307497		0.292161
								1.3468	1.14759	0.966831		1.18486		1.00454	1.12473	0.842764	0.985389	1.09507	1.10265	0.968225	0.996388	0.98076	1.00617	1.04655	0.980043		0.668561	0.903065				0.448887	0.430346	0.272356	0.324798				0.531586	0.563159	0.556197	0.497367	0.539425		0.49371		0.495626	0.500965
									0.162861	0.171766	0.171993	0.209347	0.199456	0.189411	0.185754	0.174029	0.158497		0.158475		0.138318	0.125476	0.13219		0.143141	0.14368	0.148785	0.156218	0.167954	0.185197	0.190054	0.210063	0.209957	0.204428	0.201605	0.198866	0.198314	0.201123	0.19764	0.194238		0.174594	0.197004	0.188598	0.189939	0.200955	0.207802	0.206785
									0.949978	0.390273	0.416461		0.449013	0.511686		0.463294	0.370427	0.286506	0.290157	0.262163	0.248257		0.195512		0.189147	0.184652	0.174219	0.153895	0.1531	0.147017			0.147229	0.137048	0.120341	0.12328		0.145784		0.166105				0.176742	0.181216			0.181217	0.209988
									0.681682		0.806705					0.778853						0.357625	0.616988	0.373284		0.330819	0.373375	0.323501	0.364141	0.324903	0.339802	0.429826	0.420054	0.392767	0.398201	0.39597	0.400789	0.433225	0.39357	0.471317	0.453559	0.439956	0.471327	0.460107	0.503367	0.496462	0.504437	0.53195	0.545207
										0.751786	0.746093	0.769779		0.601601	0.638939			0.710333			0.615365	0.571348		0.601299	0.635876	0.714854	0.827644	0.710355	0.864441	1.01851	0.916054	0.748821	0.79352	0.631131	0.848951		0.647134	0.644757			0.555738	0.506143	0.495956	0.456642	0.497248	0.475523	0.436846	0.485261
																0.414922	0.391906	0.328571			0.273376	0.269379	0.257372	0.271322				0.251774	0.258147	0.248385		0.241136			0.250192	0.247698		0.255605	0.276293		0.29898	0.290342	0.290135	0.305423		0.317495		0.312864
																	0.344528	0.343429	0.261997	0.330849	0.256019	0.221196	0.231459	0.247173	0.220153	0.236144	0.23025	0.237237	0.223419	0.207742		0.204582	0.214858	0.203327		0.196018		0.210361	0.219322	0.237983	0.232173						0.319239	0.322668	0.337705
																		2.92556	2.44175	1.40931	1.28426	1.40568	1.37783	0.827297	0.88485	0.619223	0.626079	0.640655	0.524213	0.244654	0.451048	0.402114	0.403957	0.432697	0.454367	0.296248	0.45895	1.36912	0.478029	0.535589	0.52438	0.390024	0.532736	0.498549	0.450697	0.449518	0.464417	0.510916	0.391143
																		2.65273	2.75975	2.787			2.44776	3.01214				0.513311	0.371432	0.369366	0.415917	0.346838	0.365833	0.355	0.344785	0.340542	0.328299	0.337438	0.364407		0.348924	0.376148	0.383269	0.37366	0.366078	0.376124	0.380777	0.352795	0.349209
																		0.284628	0.272047	0.245385	0.26195	0.254114			0.243744	0.242591			0.266759	0.262248	0.254247	0.275223	0.269262	0.262552	0.276572	0.270001	0.283293	0.259572	0.254673		0.255936	0.257596	0.279937	0.297935	0.314232	0.309952	0.336945	0.327047	0.36642
																		0.807634	0.812592	0.820746	0.910709	0.964227	1.04145	1.04973	1.17013	1.11227	1.05742	1.04313	0.967667	0.990803	1.02917	0.949675		0.939155		0.935135	0.958052	1.03283	1.06143	0.903895			0.992565		1.02465			0.978634
																			0.497766	0.466493	0.463161	0.496469	0.46007	0.500666	0.46625	0.449856	0.401569	0.396484	0.405532		0.389966	0.385697	0.377861	0.377298	0.38276	0.390244	0.39057	0.451844	0.446655	0.45726	0.45364	0.430545		0.454651		0.45864	0.455612	0.445834
																			0.466507	0.507004	0.691854	0.830095	0.636171	0.383208	0.56954		0.640054	0.644758	0.496487			0.488163	0.505029	0.527614	0.522621	0.570279	0.789625	0.877672			0.984117	0.924752	1.03198	0.791756	0.878191	0.877906	0.912916	0.684162	0.740023
																			0.414441	0.366223	0.389686	0.387713	0.301776	0.283356	0.283779				0.31128	0.307495	0.313235	0.313548	0.332468	0.339358	0.346073		0.405256		0.410635		0.396707		0.395377	0.41369		0.392097		0.38791
																			0.320275	0.300211	0.358795		0.367653	0.336505		0.361928			0.290743	0.295726	0.293626	0.326768	0.340321		0.294075	0.297881	0.291753	0.300531	0.303354	0.308131		0.299886			0.318108	0.318554	0.316064	0.324441
																				0.223286	0.198258	0.247285	0.164263	0.194941	0.164517	0.190914	0.167998	0.14519	0.147328	0.156465	0.151397		0.164278	0.165315	0.156667	0.181009		0.188983			0.188317	0.196039	0.210843	0.204239	0.195486		0.195419	0.188994	0.181022
																				0.440536	0.513569	0.421136	0.447744		0.405519	0.371978	0.400148			0.398695			0.483641		0.421626		0.529119		0.472844	0.493452	0.513098		1.1327	1.24493	1.20455	1.39794	0.979089	1.06264
																				0.194531	0.182779	0.18388	0.1706	0.227105	0.178727	0.230613		0.214345	0.245226			0.198274	0.223626		0.240195	0.240851		0.262172				0.243784	0.229394	0.269274		0.275282	0.27855	0.274574	0.279099
																					2.37622	2.06373	1.66143			2.03786	1.96354		2.18142	2.03463	1.97461			1.9587						1.56639				2.10265
																					0.490503	0.552751	0.481682	0.484379	0.498075	0.533081	0.56581		0.592493	0.612082		0.636124	0.672473		0.694316	0.662597		0.709881			0.774818	0.74864		0.769765	0.758345	0.736045	0.75157		0.756597
																						0.352133	0.349438	0.371885	0.347602	0.375781			0.406351							0.557127		0.546023		0.643614	0.580346				0.681613	0.614984	0.58683	0.588038	0.583176
																							1.28488	1.58761	0.865676			0.883744	0.805553	0.588961						0.725364	0.512738		0.404073	0.380408	0.357461	0.337472	0.336112	0.322371	0.327693	0.319953	0.32872	0.33115	0.32863
																							0.547135	0.490569	0.385253	0.379263	0.395433	0.329314	0.2703	0.24579	0.25803	0.259355	0.233712	0.195033	0.210296	0.242475	0.250034	0.272451	0.303064	0.305826	0.290326	0.304405	0.276689	0.25815		0.295293	0.270821	0.241935	0.286982
																							0.645877	0.666002	0.67471						0.857364	0.874175	0.887201		0.947948			0.905638			0.973616	1.02733					1.12743	1.18205	1.19705
																							0.430644	0.523604	0.383253	0.373024	0.388968	0.411273	0.379228	0.377953	0.339879	0.309544	0.322934	0.28629			0.269243	0.272188					0.357732	0.365188	0.336555
																								0.506043	0.469333	0.441881			0.534509	0.364321	0.401783	0.460889	0.419233	0.357855	0.372682	0.376674	0.348413		0.335461		0.351784	0.430518	0.31118	0.316498			0.370995		0.388307
																									0.432511	0.385483	0.381662	0.365649			0.363563	0.360594	0.364907	0.35948	0.332606	0.34044	0.361379	0.368814	0.369143	0.380256		0.356694		0.34108	0.336924		0.35857	0.352795	0.349737
																									0.270881	0.229855	0.25452	0.284851	0.228586		0.214099	0.210991	0.190626	0.186494	0.192961		0.20143	0.199509		0.220461	0.215216	0.213987	0.223321	0.224358	0.213323	0.227628	0.2419	0.248807	0.251026
																									0.530822	0.751441	0.610555				0.559733	0.417164	0.488567	0.366002		0.623032	0.44555	0.428487	0.426083	0.449847	0.442046		0.433193	0.535526	0.455055	0.41349			0.405724
																									0.491545	0.499054	0.579635	0.63818		0.578892	0.58565	0.585073		0.671277		0.668545	0.657038	0.764409	0.829107	0.831068	0.822
																									0.42492	0.309102	0.27685		0.336283	0.318663		0.352587	0.360032	0.341483	0.284231	0.267254	0.295555	0.426215				0.411586	0.416278	0.3943	0.391884	0.416471	0.411592	0.414977	0.415738
																										0.938373	0.901579	1.06758	0.821326	0.979662	0.773717	0.769455								1.08237			1.62959			0.975668	0.875751		0.958697
																									0.584019	0.573039	0.57852	0.61629	0.421843	0.609676	0.895361		0.458136	0.570536	0.538748	0.505887	0.505069	0.535186	0.577675	0.553555	0.549522		0.500908	0.567055	0.579571	0.594299	0.576529	0.599566	0.617428
																									0.70406	0.556996	0.614465		0.624113	0.596345	0.630142	0.593791	0.615527	0.687707	0.625058	0.635839	0.682211	0.663226	0.712635	0.678252	0.748567	0.75002		0.755487	0.657314	0.772111		0.658231	0.669298
																										0.513619	0.611722	0.502028	0.44587	0.439785		0.455363	0.588165	0.434219	0.469467	0.496474	0.543371	0.510665	0.536848	0.518466		0.51044	0.49969	0.465111	0.459888		0.407691		0.412396
																										1.60029	0.674477	1.15063		0.460748			0.548175	0.391997	0.530204	0.349481	0.344711	0.511493	0.384633	0.382063	0.362506	0.337135	0.335472	0.310648	0.282609	0.283047	0.31494	0.288616	0.298196
																										0.385945	0.447726	0.377401	0.436423	0.549991	0.655489	0.523072	0.806688
																										0.549773	0.5088	0.486221					0.526615		0.552911	0.584181	0.593462	0.629571	0.674196				0.7216	0.716246	0.729881	0.783077	0.816346	0.815875	0.838958
																										0.303165	0.323733	0.291583	0.269071		0.205932		0.255911	0.188777	0.255005		0.273372	0.287077	0.297803	0.27222	0.293131	0.296027					0.314466	0.301065	0.296007
																										2.37529	2.2588	1.95169	2.03277	1.85727	1.5761		2.82487	1.98462	1.82104		2.11401	2.54027	2.3362	1.37802	1.44683	1.30072	1.4574	1.36477		1.42297	1.38324	1.41955	1.58222
																										0.231995	0.245741	0.273498		0.240152	0.257416	0.254697	0.278388		0.299009	0.241218	0.239143	0.263152	0.32184	0.336047	0.359572	0.341042	0.351565	0.335486	0.302872	0.356941	0.261029	0.29082	0.291651
																											0.969182	0.911445	0.916139	0.987685	0.965289	0.933875	0.898655	0.934955	0.902158	0.837498	0.891916	1.01792	1.04599	1.03886	0.963672	0.966501	0.945465	0.864365	0.876422	0.800339	0.753211	0.670196	0.680941
																											0.404916	0.35325	0.366808	0.361403	0.370493	0.400141	0.411985	0.392906	0.390617				0.438997	0.465977	0.440905	0.46191	0.446337	0.456678	0.44401	0.447925	0.426458		0.476775
																											1.48082	1.54952	1.55544	1.65673				1.53137	1.50224	1.22815	0.949079	1.14097	1.11426	1.07324	1.16263	1.04002	0.923377	0.922673	0.590267		0.612143		0.516541
																											0.319657	0.313564	0.419244		0.300414		0.340083	0.29841		0.290769	0.29827	0.321882	0.328874	0.336916	0.363696	0.330348	0.36088	0.351292	0.367886	0.370977	0.380572
																											0.234167	0.320662	0.217146	0.208772	0.216427	0.201563	0.204436	0.210338		0.214579	0.22823	0.238397	0.276343	0.285903	0.282965	0.296742	0.289122	0.308507	0.310519	0.309533	0.336979		0.345208
																											0.511907	0.527917	0.532426	0.565411	0.599378	0.635496	0.682408	0.609338	0.633635			0.738576	0.760979	0.712598	0.729855	0.681542				0.606344	0.594469	0.654763	0.655005
																											0.233307	0.225274	0.248345		0.221836	0.212902			0.213491	0.213107		0.264626	0.275925	0.26789		0.257974	0.27599	0.266653		0.300607	0.312197	0.330596	0.327333
																											0.321809	0.342278	0.329617		0.394646	0.354529		0.366897	0.350586	0.406538	0.391073	0.424623	0.426954	0.434678	0.46261		0.429991	0.463713			0.483957		0.509571
																												1.89105	1.86859	2.14757	1.72496	1.00111	1.73904	1.55946	2.27883	1.82051	1.82909	1.48	1.00955	1.04015	1.09612	1.77174	1.16268	1.21871	1.28837	1.21188	1.23698	1.19854	1.1897
																												0.84902	1.23714	0.995509	0.795979	0.821947	0.775377	0.790685	2.36245	0.913698	0.718736	1.8102		1.04285	0.889208	0.987142	0.810977	2.00167			0.838565	1.80704	0.941022
																												0.435933	0.529988	0.451612	0.497119	0.544755	0.461407	0.510823		0.567031	0.487032	0.527831	0.575228		0.523659	0.566018	0.542545	0.586341	0.585358	0.597226	0.631176	0.646994	0.696422
																												0.574314	0.624267	0.609057		0.632685	0.562193	0.52969	0.504015		0.595477	0.626598		0.63404		0.711797	0.744689	0.75903	0.778515	0.740183		0.687174	0.674301
																													0.304582	0.308281	0.269644	0.264034	0.261432			0.290857	0.215672	0.252036	0.272142	0.275207		0.269664	0.273532		0.269217	0.285454	0.274753	0.278727
																													0.612432	0.56705	0.538778	0.51649	0.610456	0.538401	0.520834	0.521866	0.491938	0.566198	0.555946	0.577124	0.571181	0.561217	0.540587		0.52319	0.520516	0.554882	0.548168	0.555364
																													0.467285	0.485213	0.459371	0.488598	0.426595		0.458761	0.483654		0.454577	0.471998	0.469496	0.479016	0.47371	0.465457	0.489452	0.481252	0.475889	0.471452	0.510248	0.477128
																													0.519169	0.440227	0.437284	0.393743		0.42408	0.456088	0.42054	0.411453	0.451117	0.452223	0.459964	0.403257	0.402434		0.429759	0.444426	0.429534	0.441586	0.447069	0.467762
																														0.603781	0.550755	0.553033	0.507366	0.509632	0.518369	0.501572	0.494338		0.532786	0.552435	0.557572	0.5808	0.539488	0.521066	0.590235	0.539181	0.538842	0.534003	0.565841
																														0.363695	0.405558	0.391412	0.441494		0.473181		0.45868	0.594183	0.521368	0.571403	0.554071				0.389537				0.344967
																														0.801003	0.768133	0.866632	0.739932	0.759889		0.716766	0.740115	0.673327	0.668031		0.741043		0.805906		0.549931	0.58612	0.585661		0.582838
																															0.364045	0.294605	0.309255		0.307463	0.31745	0.308274	0.345779	0.373894			0.271172	0.268628					0.301595	0.284538
																																0.330484	0.26222	0.20342	0.181278	0.165474		0.19961	0.230779		0.267379	0.297708		0.313158	0.313384	0.342765	0.339303	0.359784
																																0.644515	0.660255	0.785413	0.717167	0.645371	0.708259		0.797651		0.753988		0.799389			0.838606			0.810502
																																	0.588615	0.595699	0.52844	0.541537	0.552707	0.659263	0.693964	0.65667	0.651606		0.552288		0.66199	0.650508		0.709427
																																	0.778442	0.658817	0.713626	0.887049	0.813849	0.697394	0.69315	0.854057					0.673183	0.768798	0.715434	0.68565	0.694068
																																	1.0516	1.06	1.01563	1.08171	1.18023	1.23942	1.26306	1.34802		1.27617	1.24189	1.22901	1.43822	1.42312	1.35152	1.36445	1.45964
																																	0.335315	0.527873	0.361865	0.440507	0.393169	0.445693	0.358503	0.397073	0.414893	0.348562	0.409374		0.360435	0.347758	0.398901	0.387919	0.399758
																																	0.582788	0.547325	0.575225	0.723607		0.747351	0.742532	0.741274	0.796999	0.786412		0.93658	0.880085			0.987801	0.979118
																																		0.458266	0.684675	0.494005	0.457091		0.520414	0.465979		0.435153	0.432114	0.466251	0.416139	0.441227		0.381231	0.38957
																																		0.749312	0.744341	0.804268		0.895703	0.963902	0.757288		1.00905	0.98024	0.952138	1.04602		1.10329	1.14637	1.23746
																																		0.743942	0.799151	0.809758	0.778128	0.78861	0.879967	0.864301			0.837136	0.89081	0.837333	0.816507	0.74222	0.93393	0.729941
																																		0.858944	0.818054	0.665382	0.716378	0.645387	0.651497	0.725313	0.664836	0.635715	0.648177		0.685854	0.729459	0.696865	0.731964	0.721515
																																			0.358695	0.390198	0.381173	0.285125	0.335593	0.390931	0.306418	0.323706	0.27535	0.368455	0.284574	0.293798	0.34781	0.266352	0.270124
																																			1.15844	1.00918	1.08147	0.877482	0.802101							0.854033
																																				0.502242	0.52095	0.625004	0.545888	0.547081	0.555402	0.569181	0.534823	0.524445	0.508954	0.518799		0.500074	0.478595
																																					0.137594		0.169738	0.23157	0.199947	0.164038	0.164291	0.169646	0.181352	0.201787	0.159043	0.168442	0.172426
																																						0.567402	0.533187	0.564835	0.592283	0.710745	0.62121	0.645551		0.572896	0.530742	0.517079	0.597762
																																						0.373103	0.312543	0.340468			0.269964	0.277663	0.297814	0.285495	0.286531	0.268277
																																							0.439549	0.421017	0.458378			0.417198	0.393833	0.440426	0.397406	0.37789	0.393066
																																							1.05517	0.952197	0.994016		1.092		0.883961		0.82533
																																								0.211135	0.218495	0.206908	0.213171	0.215287	0.209391	0.209527	0.21681		0.212079
																																								1.5597	1.26042	1.21476		1.22973		1.09516	1.47824	1.30718	0.876134
																																								0.873526	0.796935	0.717728	0.726562	0.647936	0.635111	0.55619	0.561324	0.720759	0.673472
																																								0.756985	0.608668	0.646712	0.668806	0.93772	0.663775	0.876721	0.788034	0.721849	0.670934
																																								0.480968	0.487451	0.472452	0.499109		0.501076	0.466826	0.478092	0.477773	0.498139
																																									0.450781	0.47567	0.409318	0.390508			0.448518	0.417704	0.467635
																																									0.271303	0.418878	0.410589	0.431376	0.357313	0.35332	0.382599	0.503014	0.49574
																																										0.508567	0.511703	0.569991	0.52528	0.526489	0.513175	0.550092	0.508455
																																											0.343332	0.330057	0.29281	0.309479	0.372473	0.340269	0.326113
																																												0.720518	0.713847	0.748658	0.940071	0.663235
																																												1.23288	1.47388	1.15059	0.634032		0.898643
																																													1.63596	1.69734	2.03032		2.27269
																																													0.510707	0.497137	0.583352	0.563104
																																														0.422286	0.485312	0.463431	0.429741
																																														0.352364	0.351858	0.349521	0.360046
																																																0.442336	0.383754
																																																0.2425	0.259433

Treated with: 0.005xEAA
Replicate 1, Treated at time point 36
0.684128	0.681949	0.696012	0.708493	0.798315	0.767926			0.840408		0.795223			0.800631	0.781225	0.920892	0.905072		0.998789	1.19356	1.15756	1.18804		1.53812	1.51921	1.70892		1.57518		1.63426	1.61522	1.52814	1.56342	1.74758	1.60243	1.6324	1.7963		1.91406	2.21914	2.26304			2.41863	2.25955	2.30934	2.25796	1.96557	2.13648	2.42276
0.693871	1.27389	0.663633			0.463026	0.482654	0.415932											0.511593			0.517741			0.385106	0.382908	0.358299	0.394533	0.371272	0.365122	0.379337	0.375007	0.407229	0.356859	0.381878	0.366268	0.382362	0.409271	0.458363	0.521195	0.52827	0.536035	0.530143	0.54432	0.545539	0.563028	0.571918	0.592244	0.603342	0.606457
0.455101	0.448324	0.426006	0.483416	0.504199														0.572036			0.468484	0.397446	0.571373	0.475438	0.483131	0.504093	0.513289	0.480439	0.533803	0.506897	0.527638	0.493665	0.477977	0.475918	0.501447	0.487835	0.487935		0.63851	0.656756	0.693197		0.686468	0.716769	0.685901	0.741461	0.756745	0.848624	0.813152
0.437111	0.445706	0.436874	0.448409	0.47214	0.475144	0.499925	0.583881	0.585577		0.601666	0.557053		0.578718		0.520202	0.467549		0.459726	0.514133	0.472835	0.489968	0.449297			0.461278	0.446071	0.674642	0.483941	0.585421	0.472356	0.507495	0.47971	0.474516	0.472946	0.486256		0.528745	0.631208	0.70051	0.743893	0.799467	0.810079	0.850851	0.887846	0.877526	0.915572	0.926382	0.948104	0.94203
0.655787	0.681898	0.645914	0.617506	0.58163	0.615432	0.590374	0.609798	0.606809	0.581356	0.602689	0.603123	0.5613	0.798755	0.580997	0.597233	0.654605	0.858707			0.676451	0.602731	0.918772	0.918848	0.685772	0.952452	0.713308	0.818486		0.824015	0.891852		0.930084	0.918229	0.929454	0.908318	0.930035	0.996618	1.127	1.26499	1.28855	1.28566	1.29894	1.2872	1.25358	1.23694	1.27546	1.269	1.3316	1.34196
0.437995	0.434782	0.429851	0.410755	0.438884	0.395336	0.410657	0.415913	0.456158	0.454177	0.473887		0.455516	0.45965	0.506948		0.540155	0.560623	0.552741	0.579494		0.580195	0.553141	0.601079		0.585648	0.601425		0.592978			0.633174	0.628373	0.630585	0.633192	0.63326	0.630778	0.643166	0.711562	0.76508	0.776829	0.778943	0.785227	0.783093	0.80106	0.792714	0.802582	0.805132	0.804053	0.8336
							1.63009	4.32149	3.39069	3.20875		2.38658	2.17482	1.9406	1.79595	1.60408	1.6911	1.67337	1.77033	1.61048	1.63277	1.51983	1.34004	1.47397	1.48622		1.5328	1.09582				1.72803	1.76026			1.84691	1.70598	1.91303	1.60894	1.90425	1.34983	1.88095	2.08482	2.18154	1.70449	1.7249	1.54569	1.52536
0.581124	0.598662	0.570187		0.58782	0.612648	0.569007	0.574836	0.595145	0.584243	0.565525	0.641772	0.678484			0.673354		0.614416	0.5384	0.491022		0.473253	0.426995	0.505928		0.468298	0.516478	0.449952	0.455373	0.438151		0.414341	0.481004	0.457892	0.434774	0.42348	0.458116	0.492601	0.567657	0.705035		0.803325	0.875457	0.915883		0.891463				0.849598
1.94545	1.86899	1.87396	1.20519	2.1279	1.74605	1.64565	1.91958	1.98231			2.02604	2.39756	2.03154	2.89134	3.70183			3.07177	2.97642	2.79684	2.18376	2.11029	2.86986	2.56696	1.80791	2.75849			2.36385	1.4166	2.54201		1.99559			1.73127	1.80202	1.79579	1.85074	2.58949	1.91567	2.03382	2.66317	2.92448	2.49658	1.64186		2.59864
0.757988	0.779638	0.792469	0.826878		0.742992			0.756496						0.717714		0.805852	0.802983	0.836835	0.893413	0.788949	0.903631	0.885092		0.966817	0.890996	0.84024	0.850669	0.851179	0.824968	0.86726	0.906507	0.842695	0.94862	0.862472	0.896342	0.925349	0.883321	0.945703	1.04011	1.06703	1.06817	1.0835	1.09083	1.10047	1.24355	1.14234		1.19067	1.18026
1.15239	1.06072	1.06913																															1.05628	0.90802		0.94278	1.08739	1.10058	1.27626				1.28653	1.38434	1.33209	1.37346	1.40005	1.42689	1.45319
0.404227	0.45577	0.448414	0.468103					0.192299	0.197028	0.179623	0.191095	0.187455	0.190232	0.230826		0.18198	0.184921			0.161034		0.160275		0.158926	0.156568	0.150847	0.148836	0.149708	0.145648	0.150131		0.174256	0.158889	0.157253			0.168321	0.20734	0.229352	0.249083	0.259314	0.272509	0.268235	0.276648	0.286849	0.300097	0.297169	0.313895	0.309619
0.373963	0.396693	0.421097	0.42906			0.51238	0.620031	0.572302								0.390845	0.423664	0.343577	0.369492	0.330697	0.291507	0.301991	0.339714	0.313512	0.318668	0.34413	0.308582	0.298878	0.284542	0.291632	0.310686	0.286503		0.290804	0.299562	0.294082	0.293848	0.368238				0.452231	0.456476	0.477775	0.482377	0.493826	0.483795		0.467343
0.332072	0.350213	0.386837				0.36087												0.528432		0.450148		0.399444	0.41292	0.489934		0.530439		0.555817				0.854574		0.87209	0.958993		0.879472		1.09174		1.17176	1.28742		1.12704	1.08162	1.06448	1.09527	1.32639	1.25734
0.338075	0.381122	0.52465	0.571909															0.375435	0.360268	0.376595	0.341013	0.337846			0.348601	0.328554	0.312712	0.327245	0.323967	0.338513	0.348716	0.335534	0.340348	0.311506	0.324434	0.331437		0.461661	0.530502	0.555558	0.546832		0.586627		0.603642				0.620777
0.435989	0.506308	0.59589			0.543968	0.618954	0.551578				0.731124	0.749946					0.846932					0.922371	0.72655	1.00689		0.943691	0.687443	0.810825	0.787804	0.847076		0.710375	0.557474											0.561596	0.518029	0.559602
0.454548	0.436436	0.414017	0.571828						0.518002		0.559423	0.569717	0.574727	0.562662	0.544101	0.618026	0.546126	0.51377		0.490102		0.472093	0.459274	0.44368	0.47511	0.446501	0.406767	0.437452	0.426959	0.426581	0.435736	0.445616	0.428955	0.448701		0.440124	0.500309	0.553155		0.689328			0.762441	0.806819			0.753758	0.758732	0.746369
0.597599	0.626197	0.607111	0.590689	0.673181	0.668669		0.80564	0.743746	0.779079	0.729276	0.712706		0.829503	0.684484		0.692424		0.654609	0.704323	0.701536		0.609712	0.65849				0.523695	0.578434		0.721293	0.828506		0.887311	0.854783	1.02752	0.973075	1.13452	1.15879	1.29569	1.15544	1.38425	1.38025	1.32082	1.204				1.4879
0.526928	0.590784	0.571203	0.611836	0.7231	0.784166		0.727485															1.21806										0.963859	0.857448	0.903669		0.924486		1.01094	1.00532	1.01911		1.01073	1.10921	1.11588	1.11656	1.15698	1.13161	1.24818	1.24998
0.527696	0.550142	0.780646																					0.670075	0.61036	0.667243		0.706263		0.586486		0.551367		0.557706	0.490213	0.615843	0.6465		0.720749	0.530975	0.697251	0.587588	0.658683	0.562289	0.52855	1.05873	0.543545	0.646433	0.74718	0.560444
0.276814	0.268528	0.293547	0.267049	0.293075	0.301542	0.244145	0.290142	0.281507	0.286208	0.285405	0.302586	0.251446		0.328308	0.327124	0.314221	0.340141	0.339189	0.318966		0.298359		0.283637		0.27491	0.262568	0.262737	0.268423	0.273812	0.261396							0.275522	0.339057	0.355905			1.22814	1.19252	1.25395		1.31791		1.22453
	0.346583	0.341345	0.326135	0.334615	0.292565	0.413483	0.418117	0.457818	0.497767			0.503778	0.500542	0.693645	0.812373	0.766715	0.963602	1.52386	1.87553	0.902155	0.910481	0.825923	0.750142	0.858435	0.665441			0.852784	1.0223		1.20195	1.05266	1.13799			0.781224		0.869047	1.01108		1.0539	1.01831	1.10025	1.07643	1.13994	1.03298	1.11037	1.09193	1.10614
0.691652	0.633565	0.658902	0.613281	0.600736	0.58516	0.607164		0.542586	0.438305	0.507311	0.423553	0.438151	0.405398	0.361758	0.341841	0.33504	0.377097	0.318049	0.297906	0.294017	0.305305	0.321413	0.330803		0.327023	0.307463		0.352537	0.343523	0.36325	0.399428			0.393522	0.379202	0.409975	0.412841	0.424541	0.415818	0.429396	0.403398	0.412188	0.423751	0.455097	0.427935	0.426149	0.445646
0.512434	0.478328	0.535939	0.479638	0.501645	0.494954	0.464023	0.438226	0.455505		0.485292		0.518726	0.452976	0.515315				0.516262	0.575551	0.552624				0.680067		0.744126	0.748374	0.761875		0.799608		0.841396		0.837763	0.851697	0.901257			1.18183	1.19375		1.3411	1.37817		1.49998		1.41762
0.380695	0.421306	0.35318			0.565204					0.427628		0.456029	0.34101	0.361175	0.38088	0.341744	0.319759	0.310523	0.273202	0.294676	0.301851	0.275226		0.254283		0.264466	0.289886		0.305907	0.311749		0.329765			0.312879	0.326401	0.351402	0.412947	0.45749		0.52944	0.545533	0.556078		0.568173	0.554219		0.560615	0.571545
0.283425	0.296181	0.312464	0.318743	0.27996			0.286794			0.304846		0.288301	0.453977	0.26653	0.286798	0.248387	0.252411		0.248341	0.237665		0.232508	0.24943	0.229511	0.242929	0.268634	0.283895	0.291395	0.302217	0.320793			0.32587	0.322523	0.320256	0.314742	0.329175	0.38892	0.455708	0.488051	0.485943	0.488622	0.482225	0.476474	0.474712	0.45899	0.4657	0.461827	0.48793
0.543336	0.52769	0.497202	0.473891	0.486428		0.562136	0.578659						0.545836					0.349127		0.434566	0.400486	0.342976	0.386784	0.37621	0.419648		0.397086	0.367199		0.422405	0.357994	0.37118		0.369918	0.354831	0.341196	0.37518	0.42623	0.412002		0.419885	0.44889	0.545933	0.490662	0.508233	0.547263	0.596186	0.588699
0.442385	0.444903	0.474368	0.477596		0.468253		0.572113														0.585876	0.430901		0.499721		0.514803	0.482757	0.488465	0.483614	0.485692	0.472227	0.481905	0.46685	0.462674	0.455543	0.447784	0.456669	0.488484	0.530207	0.548499		0.560772
0.460315	0.44824	0.479826	0.573404			0.522212																		0.627864			0.372185	0.418084	0.454481	0.426397			0.412736	0.352201	0.386926	0.391362	0.380387	0.439678	0.478223	0.530209					0.602221		0.625985	0.677913	0.707411
																										2.46854	2.75796	3.06727		3.13497	3.01835	3.03764	2.98969	2.39216		2.5109		3.52854		3.45276				3.46189					4.06402
0.491237	0.558315	0.56358	0.638471		0.747406										0.840082	0.915477				1.01348	0.824371		0.85273		0.739772	0.789406	0.670063	0.721629	0.624994	0.672303	0.692846	0.704693	0.574702	0.554733	0.559912	0.518889	0.575261	0.629488	0.679109	0.70426	0.694549	0.746697	0.755659		0.78415	0.782439	0.83108	0.796082	0.843531
0.572842	0.609177	0.604335	0.629652			0.63524	0.683643												0.671685	0.651012	0.639662	0.552257		0.575464	0.532069		0.548823	0.582133	0.616172	0.624194			0.585221	0.575278			0.62071		0.791154	0.801817		0.88772		0.915424	0.903346	0.900681	0.889858	0.899154	0.886358
0.386722	0.372767	0.36681	0.390631	0.41015	0.412968	0.429412	0.409337		0.496728	0.506333	0.48514	0.531428				0.507967	0.568512	0.548982		0.417217	0.507473	0.510573	0.496454		0.434509	0.42978	0.502288	0.460471	0.466665	0.459818	0.423803	0.468495	0.448969	0.45188	0.466413	0.491457	0.502984	0.572003	0.620779	0.642095	0.640162					0.658754	0.71815	0.700549	0.718045
1.32002	1.51379	1.82408	1.62936	1.6815	1.78507		1.21494		1.0051				0.92016	1.27831		1.12503	1.18527	1.67435						3.46292	3.7657		4.75303		4.06788	2.50134	2.28967	1.40916	1.35811					0.757135	0.648908	0.514123	0.531845	0.537212
0.50111	0.514781	0.503663	0.427089	0.420093	0.527593	0.702986								0.561452			0.523969	0.432313	0.412564	0.402785	0.398094	0.388327		0.513844	0.666961	0.765266	0.812753	0.826832	0.829376	0.617008	0.637575		0.76151			0.782812	0.720154		0.723758	0.682474	0.650584	0.66954	0.668755	0.663254	0.732403	0.764849	0.784406	0.772338	0.776485
0.588701	0.612093	0.640867	0.620165	0.547866	0.569856	0.578343	0.571476	0.522902	0.517656		0.542065	0.45878	0.405302	0.388795	0.345047	0.382846		0.312692		0.294594			0.289134			0.335722		0.380064		0.382504	0.393843		0.358024	0.353851	0.35501	0.349218	0.372666	0.437034	0.479433	0.515589	0.528128	0.55253	0.564043	0.590287		0.607569	0.596344	0.618947	0.609605
0.482043	0.50624	0.485285	0.440821																								0.404396	0.351273		0.352433			0.383858		0.343194	0.357988	0.355737	0.41936		0.437862	0.452016		0.47274	0.481161	0.460052	0.467265	0.479305	0.442567	0.429983
0.44381	0.470894	0.459314	0.548128	0.59214	0.542049	0.550975	0.434267								0.471007		0.399914							0.30588	0.278919	0.385534		0.308375	0.288207	0.300064	0.28731	0.31173	0.291581									0.403061		0.38518
	0.625037	0.626264	0.648616		0.812643		0.775968	0.755543		0.65962		0.546333	0.607123	0.589669	0.529148	0.57841	0.568053	0.540717	0.560108	0.549863	0.479399	0.51144	0.503788	0.492668	0.502224	0.488548	0.423251		0.477861	0.506367		0.556427	0.54184	0.551643	0.575769		0.575541		0.811427	0.826057		0.930711		0.936758	0.961413		0.994872	1.06104	1.06975
	0.436344	0.451922	0.475117	0.452946	0.465323		0.556539	0.461181	0.46315			0.559515				0.450172		0.432528	0.41977	0.455869	0.411572	0.444397	0.465226	0.473626	0.458099	0.512064	0.506706			0.456829	0.49242		0.504695	0.496895	0.514851	0.54172	0.529155		0.674748						0.799889	0.818858	0.835007
			0.808945			0.760825	0.930672	0.84249	0.758108					0.983766				0.712837	0.92982	0.825482		0.855521		0.761649	1.11681	0.610547	0.754018	0.965519	0.916837	0.970044			1.25441	1.01127		1.3017	1.31334	1.04047	1.18696	1.3766	1.66889				1.99827				1.62332
	0.770228	0.83237	1.03265	0.770794																																		1.82851	1.47085	1.67893	1.68723			1.91528		1.41814			1.6117
	0.440063	0.459431	0.475957	0.498376		0.526457													0.612864		0.579907	0.652826	0.601134						0.611228	0.689061	0.629752	0.677586	0.707068	0.608494		0.657213	0.662251	0.7755	0.906756		1.03596	1.02147		1.07223		1.13407		1.12224	1.13807
	0.464231	0.475274	0.420542	0.533477		0.511832	0.432161	0.499614	0.517276	0.498467	0.483198		0.506456		0.476739	0.46927	0.445561	0.44448		0.465282			0.517878		0.507611	0.450684	0.462068	0.44064		0.49592		0.571244	0.466155	0.453895	0.540884	0.455578	0.527395	0.593855	0.569461			0.57559		0.620351	0.621196		0.625116		0.649442
		1.0805	1.01	1.23757	1.23644	1.2897	1.17449	1.33351	1.16275				1.08924		1.12837	1.10021		0.994027	1.00088	1.02622	0.998388	0.98967	0.979558	0.969979			0.987355		1.03464	1.01417	1.01159	1.03449		0.928078	0.95923		0.953207	1.11721	1.23156	1.32293	1.32654	1.30997		1.32454	1.34967		1.4058	1.38818	1.3875
		0.56086	0.55804	0.584593	0.530946				0.477674	0.515673	0.560886	0.523182	0.53686	0.54904	0.589643	0.610773		0.560835	0.586746	0.512585		0.532517		0.506046		0.468422	0.515662		0.458426	0.480397		0.501018		0.553872	0.529138	0.549633	0.58081	0.717293			1.01731	0.96113	1.01183	0.952502	0.933297	0.982242	0.92109	0.858375
		1.37578	1.2447	1.36578	1.30526			1.21386		1.28741			1.27301				1.30399		1.24939	1.14271	1.19945	1.07715	1.0785	1.06972		0.927779	0.961517			1.24142		1.24758		1.30517	1.45134	1.22454	1.33991	1.44205	1.66991	1.7235	1.79201	1.79274	1.95156	1.9246	2.07279	2.02421	2.15437	2.07455	2.08833
		0.426635	0.429696	0.479762	0.441814			0.456229	0.476264	0.466351	0.472514	0.436441	0.466883	0.514262		0.412426	0.415469	0.443994			0.394198	0.373238	0.379538						2.31941	1.93043	1.7485	1.93163	1.66059		2.39706	1.9272			2.87676	2.48232		2.87756		2.32061	4.03623	3.9378	2.21183	4.56098
		5.73866	1.60343	4.96448	3.75471	1.96804	2.27372	0.491495	0.478132	0.516205		0.511998	0.429836					0.352218		0.393515	0.341372	0.357631		0.370352		0.386064	0.379608	0.401364	0.401421		0.400101	0.429696	0.38599	0.458458		0.423682	0.442106	0.50407	0.605359	0.647774	0.651476	0.647351	0.667434			0.631048		0.686156	0.689681
		0.748834	0.73695	0.752004	0.78782				0.756835			0.759911	0.638826		0.629169							0.70356	0.570805			0.744561				0.687284	0.657781	0.613455	0.674991			0.724656	0.789491		0.964312	0.924797		0.984208	0.900544				0.964963	1.0062	1.04215
		0.434331	0.410249	0.435651	0.435288	0.434189	0.3865	0.47949		0.365							0.379828		0.293221	0.327335		0.293918			0.337212	0.29242		0.330634	0.315672	0.342823	0.330806	0.434118		0.330856		0.330112	0.380991	0.449836	0.522134	0.633718	0.652986	0.607592	0.644168	0.681998	0.779385		0.758302	0.789011	0.783994
		0.294812	0.269118	0.27168					0.253011	0.24922	0.270589	0.278774		0.213657	0.216265	0.223053	0.216903		0.220422			0.267254	0.267447				0.318813	0.312486	0.289651								0.412377	0.481609		0.614941	0.656323			0.786246	0.799156				0.847303
		0.370231	0.454898	0.46033	0.399571			0.546689	0.542133	0.506368	0.485291		0.551386	0.587236		0.546183				0.489525	0.495236				0.54371			0.559724	0.577439	0.627653	0.663046	0.697383		0.713728	0.696046	0.687513		0.775946	0.837143	0.858325	0.920761		0.935445	0.910832	0.930938		0.830014
		0.245942	0.261221	0.242502																					0.403027	0.325096	0.343128	0.448724		0.355041	0.349326	0.387466		0.344558	0.385822	0.387583	0.541815	0.511409	0.583525		0.689347	0.70645	0.726569	0.751619	0.782284	0.827209	0.828645	0.849826	0.856794
			0.257602	0.274865	0.258238	0.261556	0.270084	0.29321	0.284124	0.302509	0.300657	0.286775			0.450558	0.678833	0.325222	0.581576	0.568992	0.707952	0.725712	0.636523					0.637411		0.762558	0.693951		0.776913			0.77921		0.800198			1.05343	0.959131	0.998631		0.940713	1.00436	1.00348	0.943758	0.985811
			1.49145	1.93436	1.89901		1.74218	1.77151	1.64094	1.67615	1.67689	1.70389	1.77759	1.7662	1.82396	1.89071				1.88439		1.96744	2.05906								1.68028		1.71481	2.01239	1.85942	1.58935	1.75125	1.85863	2.01963	2.05912	2.09563	2.20411	2.13893	2.1431	2.05743	2.13292	2.91368	2.22547	2.24878
			0.506991	0.552088	0.500599	0.505477																																			0.919983	1.16402	1.14619	1.18073				1.02898	0.999121
			1.17826	0.910606	0.851753							1.03075			0.952729	1.05966	1.28768	1.46635	1.16026	1.44158	1.1775	1.24754	1.21042			1.77867			1.38967		1.49866		1.68452	1.27874	1.37063	1.71155	2.56306	2.70239	1.56386		2.34214	1.48763	1.55364	2.16894			1.83525	1.42991	1.44389
			1.01159	0.946557	1.10559																														1.03297	0.848414		0.93804	1.17138		1.1709		1.24176	1.21637		1.17909	1.16351	1.15086	1.22193
			0.379114	0.374871	0.3339		0.418427	0.410037			0.405559	0.548887							0.486688									0.610392	0.418367	0.49966	0.389571	0.406441	0.425266	0.434238	0.424469	0.413938	0.444569	0.497756	0.558708	0.537915	0.600337		0.595629	0.62713	0.619438	0.620173	0.606794	0.612712	0.603904
			0.544024	0.496506	0.509782	0.50421	0.518284	0.485181		0.503351	0.468105				0.542835	0.468831	0.453254	0.438396	0.451428	0.466022	0.425208	0.412969	0.380297			0.403178	0.373592	0.351595			0.336302	0.325787	0.325421		0.327685	0.324764	0.344105	0.393239	0.448514					0.468691		0.461919			0.42408
			0.558722	0.631644	0.591062	0.644777	0.60457			0.693121	0.664577					0.644751	0.65095		0.762677	0.916699	1.10446			1.2986	0.974464					1.07681		1.02525	0.957595	0.827362	0.881829	0.921616	0.848924	0.941515	0.884928	0.993066	1.00404	1.04554				1.02226	0.97863	1.06864
			1.63799	1.46271	0.791591	0.979866	1.12543	1.25306	1.17343						1.04291	0.739034																								1.17002	1.16031	1.2352	1.30041			1.28352
			0.737293	0.722249	0.757724	0.753601		0.792657	0.820796	0.871664				0.880604	0.860962	0.87267	0.898284	0.966634	1.05242					0.815533	0.848086	0.91034	0.92786				1.07997	1.0598	1.18893	1.10152		1.09809		1.26531		1.508			1.56012					1.54878
				0.490574	0.500266	0.500803	0.482766	0.590902		0.516747										0.543819		0.409053	0.447935	0.404677	0.445388	0.397102	0.417596	0.386275	0.38572		0.395352	0.375701	0.360789		0.372816	0.375166	0.338808		0.501308	0.529468		0.51448	0.545933	0.575624	0.575415	0.573801	0.557653		0.571118
				0.511343	0.569884	0.478459	0.518595	0.497434	0.469035			0.519832	0.500515	0.467655						0.470483			0.395609	0.392318		0.399286	0.394253	0.36839	0.346831	0.359666	0.415322	0.395162	0.377013	0.367035	0.370603	0.377782		0.476325	0.572642	0.5684	0.590682	0.631082					0.667663	0.686295
				0.971729	0.910113	0.90561		0.895041	0.952043	0.913572				0.743336	0.647815	0.610356	0.565828	0.496927	0.511398	0.503302	0.548909	0.542279	0.530875	0.536323	0.593638	0.567069	0.61842	0.678436	0.646036	0.588602	0.617697	0.605517	0.623173	0.581102	0.606719	0.660037	0.667514	0.800818	1.00125		0.989298	0.881592	1.02028		0.952122	0.923854	1.17471	0.973128
				0.574289	0.579523	0.572629	0.560517	0.572883	0.568287			0.641112						0.623317		0.526516	0.501972		0.504127	0.440534	0.464553		0.409294	0.428015								0.604421	0.650459	0.76391	0.791412	0.81786	0.78319		0.807225	0.80396	0.808196	0.795582	0.804057	0.806975	0.826066
				0.414028	0.436626	0.407636	0.459754							0.488264	0.453407	0.573498			0.413114	0.422952		0.416882			0.442093		0.458361	0.462412	0.455832	0.44693	0.444441	0.457513	0.458233		0.473312		0.498863	0.614428	0.795919	0.851349	0.916251		1.0437				1.15187
				0.486378	0.493272	0.508668		0.518389	0.553805	0.627089	0.533483					0.595361	0.603299	0.643062	0.627795	0.650244	0.656937			0.706705	0.667376	0.686524	0.702637					0.700209		0.697478				0.815295	0.862923	0.984075	0.994582					1.04233	1.00521	0.985159	0.985238
					0.893298	0.640751		0.782739	0.431656	0.93911	0.66301	0.947122	0.591483	0.77494	0.65488	0.911483	0.494613	0.652052	0.642275	0.515758	0.21089	0.303075	0.31856	0.190784	0.383573	0.314754	0.283755	0.266953		0.25389		0.209828		0.215344	0.24024	0.2149	0.1869	0.258588	0.299432	0.219787	0.327318	0.274052	0.164055	0.328657	0.269788	0.231547	0.180949	0.188984	0.214481
					0.41563	0.682909	0.838117	0.450724			0.440583	0.766418						0.332551	0.399685	0.295392		0.31773	0.282002	0.518863		0.290406	0.286483	0.259696	0.260826		0.254884	0.291533	0.263131	0.270914	0.283286	0.288219	0.297678	0.436031		0.595924	0.563988	0.589669				0.596419		0.505394
					0.52746	0.589362	0.553578	0.646296	0.611519	0.649606	0.651931	0.71328		0.683615	0.582337	0.573322	0.562645	0.558259		0.499355	0.456504									0.245536		0.182686	0.189996	0.203377		0.211965	0.222186		0.368128	0.394586		0.36157	0.344507	0.336481	0.318867	0.303365	0.307853	0.315592	0.3245
					1.09978	1.08991	1.07949	1.09772	1.01688	1.0101	0.919534	0.871612		0.943272	0.915806	0.868246	0.777417	0.84318	0.751202		0.784642	0.774762		0.759728			0.788481	0.803024	0.81541			0.835311		0.902468	0.885061	0.869093	0.918833	1.0142	1.02446			1.12445	1.09318	1.09308			1.13778
					0.468401	0.401717	0.431774	0.430833	0.400708	0.389745	0.406042	0.370939			0.374994				0.455205			0.45413	0.482318	0.505081	0.475558	0.495019		0.554619	0.569672	0.569079	0.561108	0.609606	0.598349	0.557349	0.582459	0.636693	0.673939	0.752826	0.776004	0.774332	0.843703	0.891968	1.00094	0.93595	1.02582	1.0743	1.07172	1.07517
					0.210896	0.216995	0.224136	0.234393	0.232011	0.241576	0.257503		0.301562	0.344317	0.314961	0.282699	0.239097		0.234483	0.228585	0.232141	0.218607	0.235236	0.214276		0.220632	0.220116			0.200422												0.216694	0.222173	0.239249				0.232436	0.244483
					0.898107	0.805975	0.712716	0.551852		0.697532		0.556208			0.472245	0.580582	0.520108	0.479735				0.614851	0.717876	0.906713	0.692271	0.757554		0.611814	0.651308	0.722218	0.574613	0.662673	0.626128	0.620098			0.729066	0.863474	0.992662	1.18552	1.28851	1.52325	1.54714	1.64045		1.77342	1.76788	1.73591	1.56956
						0.261833	0.256179	0.262455	0.269303	0.28449		0.291178	0.28193	0.275506	0.279444	0.279827	0.298388		0.264695	0.273682	0.253015	0.264707	0.289375	0.242682	0.252861	0.271005									0.276656	0.278892	0.309635				0.731265	0.747581	0.734324		0.760834	0.76123	0.759674	0.800352	0.778417
						0.283104	0.278208	0.281504		0.282524		0.299684	0.363571	0.387675	0.36565	0.409244		0.451658	0.351136	0.344881	0.358105	0.366207	0.345418	0.353913	0.356304	0.342238	0.344957	0.330835			0.287211			0.276952	0.286118	0.264807	0.267099		0.331872		0.358657	0.37986			0.391879	0.422761		0.41747	0.415522
						0.340889	0.336364	0.320423	0.295368	0.338931	0.34819		0.331118	0.366522		0.360193	0.39575	0.367796	0.38871	0.339836	0.376995	0.342947	0.329507	0.370595		0.331166	0.344132			0.340834		0.326223	0.330101	0.342009	0.342044		0.358642		0.470946	0.46932	0.502431		0.547384		0.516677	0.54612		0.576826
							0.917904	0.896847	1.00791		0.900765	0.973513	0.881157	0.868306		0.923975	0.993361	0.909513	0.862927	0.869842	0.961593	0.906557	0.89172	0.827276	0.888057	0.869819	0.845564				0.854928				0.77027		0.736307	0.902596	1.03216	1.06183		0.982187	0.983237	0.973734	0.934434	0.909235	0.910221	0.983938	0.894699
							1.85937	2.07874	1.33198		1.67449	2.84763		0.781944	0.970576	1.51408	1.08855	1.3721	2.00915		1.54706	2.62465			1.03654	0.550723	0.476412	0.675553	1.0442	0.550909	0.453474	0.540767		0.715243	0.746555	0.765283	0.375804	0.780896	0.820297		0.409996	0.488818	0.616606	0.451213	0.767685	0.762649	0.473806	0.568006	0.878546
							0.682309	0.709696	0.795114	0.785018						0.804296		0.740352	0.722521			0.691923	0.671847	0.637826							0.689425	0.685039	0.669321		0.606673		0.650384	0.811654	0.922608	0.928724	0.875941	0.832738	0.796691	0.804933	0.705722	0.706104	0.678714	0.691933	0.675128
							0.410242	0.383082	0.447759	0.392695	0.406969	0.425042	0.392972		0.408937		0.354944		0.32961		0.319138				0.333959		0.305899	0.301413	0.358232	0.420534	0.326857	0.244574	0.190337	0.195766	0.20452	0.220351	0.265152			0.399372	0.434817	0.448974	0.46102	0.47969		0.542733	0.578112	0.609838	0.670145
							0.900114	0.815041	1.25129	0.930353	1.152		0.797674	0.931331	0.860793	0.768604	0.837099	0.782543		0.814801	0.692355	0.733887	0.74309	0.769428	0.70716	0.829808	0.756583	0.71625	0.751309	0.67381	0.708689		0.729209			0.66946	0.643573	0.734465	0.829337		0.865176	0.848246	0.860113		0.812532		0.778117	0.762102	0.742432
									0.624809	0.647915	0.637761	0.650529	0.650349	0.663973				0.643798	0.612594	0.663517	0.614818	0.65766	0.653759	0.529157		0.528659	0.608434	0.567247	0.542985	0.54056	0.578522	0.577119	0.829503	0.759331	0.80861	0.812658	0.865802	0.847433	0.977853	0.901096	1.00615	0.966049	0.990001	0.954655	0.89425	1.04836	0.978017	0.888521	0.935942
									0.929064	0.952674	1.0289		0.882606		0.855773		0.914233	0.954001	0.987609	0.703747	0.829922	0.751003	0.744976	0.828653	0.825077		0.624054		0.600877			0.553658					0.552612		0.561207		0.654459	0.696427					0.721217	0.696784	0.682105
									0.432206	0.43957	0.432588	0.419846	0.44243	0.415405	0.541341	0.42831	0.403234	0.503418	0.466267	0.469585		0.519514				0.523599		0.526095	0.524161	0.545007		0.569365		0.553594	0.573698	0.573491	0.61699	0.703075	0.79922	0.892139	0.892822	0.917852	0.926842	0.925548	0.944977	0.979784	0.99899	0.996745
									0.898612	0.945506	0.887684	0.90353	0.81012	0.816087	0.718199	0.71002	0.617788	0.591881	0.572802		0.493569					0.436668	0.473693		0.488695	0.457068	0.427938	0.459833	0.447995	0.481442	0.432108	0.435628	0.466863	0.518736	0.566969	0.585893	0.602838	0.622701	0.635593	0.638714			0.635728	0.654459	0.648848
										0.756247	0.852265	0.741838	0.938575	0.741924	0.945102	1.12241	0.934473	0.934391			0.89839	0.605485	0.506053	0.566453	0.809135	0.943289		0.621206	1.14857			1.14935		1.17152	1.50122	0.630791	1.41045	0.685156	1.45102	0.77623	0.840838	0.912486	0.996325	1.51822	1.76779	1.11659		0.904973	0.859988
											0.743549	0.857435	0.827619																	0.360119	0.370204	0.355991			0.423711	0.391934			0.471914	0.507397		0.495025	0.572857	0.54478	0.568188	0.585997	0.576577	0.610963	0.560043
														0.620327	0.4887	0.454587	0.472921			0.456817									0.534834		0.565115	0.544813	0.526431	0.548256			0.559789	0.634899	0.711713	0.729597	0.751061		0.788406		0.783012
																	0.634095	0.674183	0.557004	0.565124	0.566905	0.528779	0.543217	0.482883		0.466052	0.480175		0.397957	0.386587				0.410258	0.41346	0.391388	0.427533	0.495657		0.751271	0.768771		0.914032		1.21418
																	0.488534	0.323963	0.215404	0.227453										1.26593	1.2155	1.20847		1.16457		0.8662		1.0198	1.02171	1.24595		1.31654	1.44283	1.45021	1.10028	1.09398	1.3679	1.05929
																		0.725575	0.862537	0.720581	0.73502	0.683682	0.666412	0.711895	0.68578		0.683051	0.714672				0.618058	0.608528	0.588605	0.653188	0.675704	0.743796	0.908624	1.08599	1.22092	1.25309	1.26438	1.31259	1.35253	1.35879	1.34123	1.38502	1.38146	1.35948
																		0.440046	0.31837	0.268618	0.314412		0.226749	0.242753		0.226813	0.221387	0.216996	0.206001		0.232128	0.213467	0.202969	0.212863	0.167926		0.19934		0.317609		0.281801	0.268228	0.277957		0.263526		0.2336	0.234051	0.221843
																		0.557004	0.590025	0.602017		0.637484			0.774149	0.737152	0.787697	0.808077	0.867545	0.884319	0.848001	0.876646	0.864092	0.812142	0.798864	0.797199	0.864589	0.970883	1.1684	1.2807	1.31156	1.29278	1.40112	1.39775	1.36362	1.23978	1.26523	1.24858
																		0.343155	0.299331	0.296435	0.368097	0.293019	0.308087	0.357797	0.357304	0.314553	0.324287	0.304198	0.301012	0.276846	0.263297	0.258799	0.256384		0.273999	0.263151	0.281773	0.33128	0.369291		0.422041	0.43219	0.443829	0.455061	0.476258	0.484907	0.470998	0.505584	0.477172
																		0.358178	0.388859	0.219123		0.174855	0.184611	0.160892	0.158231	0.151254	0.111919	0.138116	0.155659	0.174227		0.1736	0.174598	0.17536	0.187409	0.172099		0.217568	0.284331	0.297733	0.276822		0.305298	0.318839	0.310144	0.305389	0.302901	0.301297	0.304284
																			0.34124	0.486652	0.375412	0.298064	0.288278	0.301531	0.283962	0.271536	0.26308	0.265562	0.255474	0.266813	0.279019	0.278187	0.290522	0.297918	0.302357	0.29753	0.342989	0.389778	0.442909	0.458378	0.477519	0.476904		0.454427	0.436413	0.450537	0.478502	0.47643	0.486906
																			0.470587	0.452973	0.503302		0.460059	0.476516	0.504288		0.525749				0.51226		0.479936			0.543061				0.793857	0.797286		0.778046		0.747849			0.766045	0.823935
																			0.651929	0.573448	0.521688	0.609705	0.458874			0.525626		0.399393	0.368981	0.465863	0.360302			0.303646	0.338089	0.41518	0.843188	1.05621	0.478031	0.832147	0.493719	1.02274	0.578144	0.573741		0.557021	0.62536	0.567319	0.993228
																				0.376617	0.358067	0.342063		0.371841	0.404642		0.43698	0.446503	0.446434		0.436737	0.44209	0.44856	0.459836		0.501575	0.560117	0.610357	0.706546	0.735967	0.734402	0.768051	0.762078	0.805494	0.814729	0.836749		0.787238	0.858574
																				0.153062	0.164176	0.128522	0.125595	0.122108	0.115919	0.125105	0.142335	0.122214	0.131023	0.134785		0.161736	0.188626			0.195953		0.24973	0.280655	0.28326		0.306746	0.319016	0.326963			0.372712	0.380192	0.40008
																				0.781869	0.558321	0.565256		0.565952	0.596587	0.525918	0.54699				0.667041		0.605893	0.634877							0.979902	1.05826		1.21568	1.28925	1.38489	1.50867	1.49008	1.54655
																					0.421047	0.4151	0.428163	0.412235	0.40491	0.384315	0.395513	0.389109	0.400126	0.396752	0.386472	0.406556	0.401389	0.377234	0.410545	0.395944	0.449217	0.504872	0.558258	0.602032	0.62313
																					0.534359	0.570613	0.615067		0.638845		0.582431				0.527259	0.520346		0.51716	0.516031		0.545208		0.742845	0.787119			0.753016	0.743303	0.754653	0.773905	0.769998	0.785521	0.810706
																					0.432751	0.407422	0.374028	0.468575		0.353006	0.379821	0.381567	0.366348		0.383432	0.392703	0.367145	0.362352	0.35025	0.368717	0.397965	0.488046	0.585937	0.646158	0.689303	0.699755		0.738116	0.74359	0.73807		0.764158	0.799876
																					0.674867	0.72835	0.734421	0.766064	0.797378			0.840009		0.844033		0.874953	0.916614	0.92208	0.932871	0.936695					1.47168	1.50049	1.55945	1.62703	1.60058	1.65942	1.63489	1.6059	1.57265
																					0.873402	0.842392	0.799016		0.766154	0.838957		0.743539		0.829623				0.726759	0.630675			1.05746	1.24061		1.21915							0.961256
																					0.880828	0.730371	0.693081	0.824023	0.822441	1.04731	1.14671	1.3633										1.6435	0.965725	0.946073	1.72783	1.50918	1.20277		2.33424	1.91964		1.05004
																							0.756292	0.769816	0.791895	0.830396	0.875274	0.860364	0.933376	0.921706	0.943412	0.931687	0.909853	0.875971		0.859434	0.907725	1.06705	1.17343	1.25106		1.24782	1.2491	1.28914	1.33553	1.28104			1.02602
																							0.684028	0.621496	0.664879	0.591327	0.64503	0.608279		0.583281			0.554714	0.562551	0.583317		0.530788		0.655809	0.644841	0.753195	0.670158		0.761574	0.755262	0.699881	0.697283	0.68561
																							0.82628	0.957948	0.830446		1.11649	1.14006	1.11221	0.874902	1.03099					0.920339	0.865927	0.961377								0.767277
																							0.710292	0.645143	0.668494	0.730003		0.862486	0.792072	0.774512		0.713173	0.774496	0.776046			0.77619	0.89485	1.00687					1.01188	0.990337		1.00961
																								0.636258	0.531801	0.567443	0.572602	0.591137	0.558784	0.55809	0.585133	0.613622	0.611416	0.610527	0.656234	0.711993		0.963836	1.48979	1.28207		1.35047	1.39062	1.44629	1.48657	1.48015		1.63319	1.59828
																								0.673714	0.722238	0.725931		0.776611	0.691763	0.657591	0.744181		0.745136	0.688078		0.743701		0.95429		1.19214	1.21198	1.17731			1.17289	1.18109	1.06977	1.14661
																								0.665248	0.548302	0.608793	0.701569	0.637487	0.679564				0.683129	0.716041		0.785092	0.643798	0.759703	0.898381	0.933942		1.15916	1.33989	0.950798	0.958019	0.968309	0.744134	0.931436
																									0.423276	0.423535	0.445236		0.42406	0.432438	0.60432	0.416975	0.41376			0.433389	0.488916	0.546098	0.802024	0.653279	0.845696	0.812869	0.875604		0.891756	0.81047	0.889146	0.893245	0.861994
																									0.633066	0.76655	0.81369	0.658445	0.735856	0.683093	0.649982	0.667385	0.64743	0.611924	0.608179	0.608703		0.765482	0.840833	0.868689	0.91559	0.924742	0.981034		1.0141	1.03745	1.05972	1.07462
																									0.824549	0.808167	0.714078	0.744068	0.919206	0.985798	1.05546	0.997434	1.1398	1.24629	1.0956		0.962902	1.12856		1.37293			1.40382	1.4458	1.38597
																									0.433423	0.56395	0.460285	0.426752	0.541668	0.42305	0.362344	0.392641	0.410733	0.385652	0.384384	0.411398	0.419534	0.470598	0.49157	0.498879	0.475164	0.476402	0.433549				0.581191	0.486962
																									0.606436	0.629368	0.580248	0.522755		0.551035		0.617202	0.642361	0.671064				0.706671	0.757642	0.829831		0.818418	0.851101	0.917593	0.885		0.81935	0.812396	0.798291
																									0.861499	0.940862	0.898057	0.851521	0.893038	0.832234	0.854774	0.804096	0.917463	0.854716	0.772984		0.767422	1.01136		1.23198		1.18431	1.20331	1.20062	1.23084	1.165	1.18914
																										0.726122	0.524827	0.52555	0.529896	0.553736	0.757558	0.691867	0.639114	0.55953	0.552419	0.587202	0.610044	0.658404	0.692063		0.694445	0.710936	0.682226	0.716712	0.674499	0.687014	0.674854	0.691512	0.721397
																										0.720954	0.562191	0.485813	0.563088	0.469565	0.444126	0.456732	0.485869	0.478738	0.446006		0.402038	0.600272	0.617765	0.668157	0.641491	0.663473	0.544732	0.547611	0.538228	0.530249	0.523988	0.520871
																										0.269569	0.303082	0.314145	0.308673	0.314143	0.288823	0.319975	0.339131	0.285352	0.333262		0.268697	0.33875	0.387616	0.385832	0.384252	0.378888	0.3781	0.386411		0.38773			0.384154
																											0.858812	0.932406	0.961955			0.67122	0.945906	0.687549	0.745689				0.922795	0.833205		0.968383	0.666455	0.599196			0.579871	0.586676
																											1.13544	1.16221	1.33208		1.39479	1.40385				1.57672	1.30671	1.55915	1.83892			1.90382
																											0.763283	0.781439	0.89607	0.855994	0.886012	0.841042	0.85463	1.14442	1.12849	1.02518	0.9596		1.15944	1.26246									1.38077
																											0.515228	0.388821	0.493068	0.354554	0.427119	0.366252		0.451901	0.409586			0.493713	0.596075	0.677317	0.705405	0.707375	0.731447	0.719109	0.731819	0.740626	0.754179	0.774169	0.800549
																												0.701514	0.700052	0.711249	0.748398	0.774651	0.695681		0.726771		0.778895	0.82681	0.850977	0.942685	0.920316	0.89429	0.863691	0.899966		0.893476		0.959589	0.970588
																													0.756855	0.791322	0.694929		0.65915	0.809445	0.677066	0.62258	0.593423	0.70315	0.536131	0.6217	0.704172		0.592669	0.566871	0.564205	0.573487	0.621248		0.570945
																													0.99788		0.8619	1.09944	0.837415			0.988719	0.910396	1.16834	1.11545	1.1187		1.31013	1.29119		1.13868	1.23447	1.13693
																														0.754952	0.717953	0.759651	0.750481		0.827738	0.812048	0.849595	0.998527		1.30754		1.2974	1.32241	1.26046	1.32063	1.2448	1.3084	1.36008	1.41877
																														0.57509	0.589983	0.639132	0.588588		0.591617	0.749325	0.693231	0.757489	0.9408	0.998121	1.07255	1.05234	1.07823	1.04562	1.21562	1.17177	1.04817	1.00298	1.04456
																														1.56315	1.5135	1.88515	1.7244	1.99593		2.09219		2.27603	2.2765	2.34662	2.51179	2.52691	2.63107		2.43541	2.26619		2.76996	2.79161
																														0.388311	0.433165	0.600886		0.394891		0.401642	0.415771	0.479	0.53472	0.590785		0.610049	0.622766		0.621708	0.598083	0.621756	0.647959	0.678153
																															0.650893	0.731877	0.679451	0.772938	0.734431	0.814135		0.882511	0.957337	0.951419	0.993908	0.997194	0.987686	0.93016	1.0078	0.978784	0.965357		1.04166
																															0.443944	0.379757	0.425617	0.404888	0.360622		0.388057	0.450503	0.49698	0.546478		0.51866	0.548368	0.568166	0.539509	0.585874	0.571668	0.626269	0.622481
																															0.430558	0.437676	0.388622	0.447615	0.404822	0.420844	0.429226					0.621934			0.549392	0.532422	0.544364	0.532037
																																0.87228	0.811926	0.841259	0.81366	0.802986	0.873036		1.18602		1.32037	1.27169	1.304		1.23343	1.24875	1.35548	1.43304
																																0.904263	0.857981	0.808248	0.885992	0.836621	0.801529	0.869153	0.954399	0.987067	0.904761	0.923605	1.16368	1.03726	1.01938	0.914666		0.939713	0.865082
																																0.5394	0.443447	0.69104			0.579066	0.509962					0.575912	0.545541			0.591363	0.570648
																																	0.413409	0.436138	0.467789	0.429706	0.47422	0.620953	0.656433	0.678776	0.755779		0.744112	0.91139	0.75894		0.763481	0.808129
																																	0.448723	0.400799	0.419697	0.443216		0.439973	0.478069	0.482405	0.49835	0.499354	0.458765	0.51301	0.436633	0.488717	0.443915	0.448238	0.442684
																																	0.743425	0.635055	0.62801			0.862657		0.939279	1.01239	1.12925	1.10085	1.11271		1.2156		1.24223	1.23556
																																	0.981157	1.13474	1.12823				1.64857	1.95585	2.07526	2.08394	1.92663		2.01667	1.96378	2.05015	2.10367	2.21955
																																		0.53579	0.742136	0.708484		0.647184	0.679714	0.665018	0.900966	0.711366	0.849112		0.681256	0.829148	0.870544	0.627965
																																		0.310744	0.311008	0.313258									0.636766	0.640101		0.64131
																																			0.755292	0.390932	0.389768		0.701227	0.523446			0.479742	0.423337	0.432662	0.490058	0.452488	0.472385	0.448114
																																			0.413484	0.427533	0.434518	0.458716	0.532604	0.517943	0.532828	0.4988	0.518566	0.545261	0.556323	0.547903	0.593644	0.604277
																																			0.547408	0.542265	0.587914	0.626537	0.652656				0.731687	0.760577	0.796103	0.748717		0.812639	0.849018
																																				0.428072	0.519835	0.647326	0.642808	1.02221	0.752816	0.743934	0.770074	0.795131			1.12323
																																				0.955916	0.83006	1.17955	0.998161	1.05834	1.18167	1.15878		1.27054	1.35868		1.1932	1.078	1.09038
																																					0.706516	0.681972	0.767927	0.782869	0.780393	0.829445			0.803941			0.905391	0.933626
																																					0.498471	0.610599	0.759549	0.860895	0.887067	0.930695	0.959592	1.00632					1.05762
																																					1.55928	1.47827	1.44843	2.18908	2.23059	2.40849	2.25794			2.23088		2.2317
																																						0.588422	0.726745	0.631098		0.554988	0.582017	0.614554	0.483226	0.35536	0.386306	0.362804	0.381747
																																						1.32132	1.57248	1.49815	1.34329		1.40429	1.39611	1.50235	1.4443	1.47046	1.51649	1.51595
																																							1.01923	0.980642	1.01176					1.10495	1.12821	1.10483	1.07879
																																							3.64166	4.48389	4.38469	4.94828	4.18954	4.00217	4.31503	4.81301	4.40952	4.07644	3.86167
																																							0.567109	0.573835	0.623662	0.577309	0.591736	0.631271	0.636175	0.633925		0.668498	0.839612
																																							0.861097	0.848634	0.968816	0.844705		0.779805	0.734095	0.769058			0.869034
																																							1.07463	1.39119	1.38451	1.23	1.34982	1.30968		1.19609
																																								0.607267	0.618377	0.622475		0.640572		0.673241			0.724257
																																								1.06802	1.08041	1.23528	1.33598	1.30504	1.44403	1.42099	1.40623	1.49104	1.5268
																																									3.11874	2.43909	2.25575	2.67096	2.50143		2.08924	1.96586	1.88781
																																									0.979555	1.11643	0.995725
																																									1.31797	1.47177	1.57918		1.74584			2.01549	1.99283
																																										0.562698	0.533665	0.555757			0.606005	0.613993	0.610608
																																										0.771597	0.809608	0.773569	0.804606	0.849472		0.897565
																																											0.723036	0.712095	0.597194		0.762909		0.719232
																																												0.929286	1.05924	1.09169		1.07863	1.0751
																																												0.463135	0.478105	0.458862			0.526517
																																													0.643921	0.66026	0.666807	0.730731	0.688463
																																													0.66404	0.61722	0.599606		0.804519
																																													1.05651	1.05134	1.09108	1.18417	1.09059
																																													1.45835	1.54764	1.62894		1.65817
																																														0.721509	0.842124	0.83341
																																														1.2553	1.24102	1.24262	1.31882
																																														0.580375	0.464257	0.483481	0.617564
																																															0.806406	0.808475	0.730349
																																															1.03227	1.06026	1.02774
0.858504	0.986289	0.94228	2.28929	0.898848	1.39669	1.02026	1.79671	1.05484	0.74654	0.686162	0.545469	0.534631	0.602985	0.461222	0.686112	0.649891	0.466784	0.38618	0.538218	0.560785	0.440691	0.360743	0.369485	0.385029	0.26719	0.293983	0.191548	0.187369	0.274477			0.197453		0.187068			0.219473	0.266353	0.226705		0.245387	0.286579	0.34586		0.388303	0.382245	0.32434		0.459824
1.49881	1.79521	2.73162	2.49708	2.52121	2.61752	2.54048	2.36801			2.13964			1.89998		1.46665	1.27552	1.31642	1.14986	1.16053	1.35378	1.1918	1.05025	0.793515	0.836108	1.04654		1.01455	1.00133	0.874245	0.855148	0.928053	0.788857	0.836077	0.864619		0.795641	0.773982	0.86654	0.854764			0.932728	1.01538	0.929197	0.933886	0.960108	0.879568	0.891416	0.892714
1.51397	1.69475	1.25906	1.46775	1.05876	0.768561	0.523644			0.611074	0.488448	0.524361	0.650927	0.815681		0.6471	0.567695	0.488613	0.503366		0.633921	0.856941	0.523074		0.869134	0.749563	0.667286	0.736861	0.969448	0.725977		0.663837	0.6966	0.826518	0.871232	0.950066	1.07059	0.766563	0.64439	0.605014	0.588923	0.506305	0.51479	0.502671	0.509957	0.524658	0.514737	0.558291	0.566847	0.483589
3.65553	4.68837	3.17187	2.83759	3.79659		3.42511	3.00462	2.49658	2.34009	2.06093	2.31323	2.7048	1.49191	1.69518		2.0605	2.05256	1.99503		1.54863	1.77894	1.71771	0.85955		0.622024	0.687614		0.626464		0.641764		0.526884	0.49348	0.523205	0.495148	0.487004	0.519662	0.661703	0.680042		0.747148	0.716177	0.72998	0.735819	0.718059	0.783682	0.746902	0.821184	0.833051
5.11245	0.787764	0.539331	0.669994	0.386972	0.678112	0.873422			3.68331	2.67118	2.7349	1.91938	2.51472				1.40515		1.4792			1.19033	1.26675	1.2105				1.88756	0.305577	0.313971	0.31489	0.342638		0.296094				0.29599		0.450474		0.530842	0.624542	0.598901	0.629725	0.594984	0.611516	0.635082	0.674613
0.897718		0.777525	0.767177	0.762963																	0.788242	0.616886	0.838724		0.598131		0.601467	0.69757	0.665608	0.745979			0.878846			0.60898					0.550325	1.31465	0.847566					0.828799	0.815186
0.420329	0.448683	0.453404		0.510819	0.512418	0.42331																		1.34667	1.47268	1.6093	1.57014	1.83496	1.81106	1.8862	1.79268		1.77644	1.82562	2.02024	1.94072	2.19061	2.87203	3.42733	3.22007	3.86934	3.97702	3.84383	4.36126	4.17457	4.55262	4.0049	4.22787	4.42424
0.369906	0.341626	0.361647	0.429178	0.347838	0.338954			0.383701		0.542501		0.527902	0.623169	0.538957	0.579367	0.582643		0.439692	0.562526	0.447258	0.501109					0.45943	0.574823	0.499822	0.491631	0.583171		0.600932	0.57308	0.570403	0.672547	0.552222	0.712108	0.900379	0.891272	0.876955	0.853611		0.768196	0.739062	0.729277	0.672195	0.574679	0.566015	0.501819
0.277217	0.267758	0.292336		0.296332																	1.28608	1.12811	1.0827	1.11425		1.03787	0.904095	0.957511	0.909301								1.05325	1.14203	0.969936			0.989189		0.934448	0.932908	1.10495	0.959999	0.928284	0.921641
0.417491	0.519944	0.55607			0.43517		0.454693		0.420464							0.670362			0.493341		0.368856	0.369852	0.41105	0.393987		0.702942		0.432708	0.387882		0.403845	0.448726	0.387759	0.429683	0.417877			0.489599	0.634987	0.592539		0.67423					0.775925		0.779568
0.264589	0.307656	0.292583	0.276075	0.332758															0.316562	0.393572	0.328331	0.345781	0.340001	0.341865	0.345355				0.331682	0.351762	0.373584			0.413172		0.388754		0.619117	0.755616	0.846501		0.823042	0.860123				0.963775	1.00955	1.01723
0.860672																						1.0059	0.965911		0.989117			1.11762			1.15949
0.961829	1.03203	1.25685	0.795866	0.869723	0.915144	0.737178	0.854837	0.891328	0.851242	0.893293	0.973641	0.79729	0.834672			0.814189		0.771057	0.543268	0.634976	0.611647	0.58795	0.726923	0.554335	0.539652	0.588873	0.544231	0.531961	0.557332		0.696722	0.718588	0.686095	0.552526		0.646999	0.727792		0.821855	0.827734		0.824462	1.01303	1.1591		0.918613	1.03763	0.853337	0.777549
0.169743	0.185961	0.195183	0.213309	0.22637					0.328262												0.378998	0.372751	0.513503		0.35277	0.327766	0.326781	0.332324	0.353742	0.327575	0.331042	0.320723	0.342783				0.335319			1.74536	1.12399	1.88976	0.444447	0.442512	0.466319	0.464812	0.462942	0.474715
0.346681	0.319003	0.331213	0.514716	0.307543																			0.783327	0.721413	0.666231	0.770421	0.686836		0.598778	0.591412	0.679181	0.67906		0.712172	0.643171	0.745296		0.784234			0.886153		0.938968		0.895754	0.94974			1.06228
0.244274	0.268398	0.290696	0.349109				0.498943															0.349907	0.307134	0.297854	0.500997	0.299159	0.306301	0.304158		0.304799	0.329482		0.339415		0.356931		0.378611	0.527293	0.647418			0.644613					0.598922		0.622537
0.176718	0.19514	0.258132	0.390494	0.587575		0.596867	0.561729	0.478242	0.549577	0.539166		0.817292			1.51306	1.40336	1.92145	2.07327	2.16528	2.85922	2.58911	2.44863		2.41649	2.6573	2.86606	1.1002	2.35026	2.22369	2.89314	3.9986	3.21884	1.73132	2.21281	1.74694	3.56527	2.48918	2.29452	2.16381	2.05371		1.20293	1.24755	1.85217	1.82661
5.36575	4.17961	4.41654	4.3355	4.41307	4.37394	3.73035	3.22941	2.83992	2.7744		3.34194				2.50077	2.55921								2.05096	2.27109	2.11422	1.99593		1.41331	2.52816		1.55499	1.72383		1.65484	1.44471	3.34147	2.02491	2.18811	2.26405	5.37945	2.3691	2.47057		2.07893	5.13098	5.18299	5.1342
0.527715	0.730822	0.651374	0.841471	0.763626	0.828774		0.815773											0.664553	0.777703	0.794745	0.73169	0.674233	0.556678	0.436838		0.516073		0.660226	0.681813	0.591893	0.632082		0.50389	0.577961	0.560193	0.575501		0.69933	0.830832		0.972139	0.986497			1.04947		1.02839		0.965368
0.212452	0.233417	0.243719	0.243033	0.272903		0.280214	0.248342	0.263608		0.378059	0.399912			0.341963						0.269307	0.267899		0.237409		0.238734	0.238558	0.268537	0.26317	0.276465	0.279221	0.286244	0.294392	0.281994	0.303736	0.301164		0.297039	0.344948	0.380115	0.404194	0.443245		0.457841	0.477332	0.468248	0.462435	0.436133	0.435138	0.432675
0.209317	0.203731	0.221873		0.197708	0.21028	0.299565		0.489482					0.300372				0.359834			0.291348	0.325176	0.294627	0.462104	0.298592		0.297567	0.30828	0.275817			0.337477	0.286808		0.375193	0.301437	0.291535				0.371186					0.479182	0.507762	0.504403	0.525606
0.330023	0.34185	0.304813	0.307406	0.297227	0.310012	0.318057	0.317588	0.30346	0.363796	0.354601	0.306185			0.375382		0.319507	0.33964	0.310416	0.27825	0.276944	0.273921	0.268762	0.259323	0.269145	0.258014	0.24773	0.263711		0.257081		0.270574	0.273888	0.260604	0.257674	0.250371	0.262833	0.286557	0.340038	0.382278	0.388889	0.388259	0.387145	0.383606	0.394758	0.410356	0.388008	0.391382	0.402774	0.395813
	2.87154	3.05954	2.52961	2.87126	2.2395	2.79344	2.8834	3.00967	2.41747	2.51223	3.00354	1.76979	2.80382	1.94398	1.88385	0.590616	1.50122	1.18539	1.04603	0.993627	0.969126	0.867094	1.08506	1.11368	0.679166	0.656848	0.881193	0.711555	0.735704	0.558241	0.537574	0.541167	0.233721	0.301084	0.421212	0.551267	0.477357	0.57191	0.512876	0.594105	0.593577	0.506806	0.542202	0.510573	0.528066	0.53487	0.477889	0.504379	0.477402
													1.44489						1.45555									1.49109		1.10553			1.48011	1.15702	1.81554	1.63979	1.72466	2.05079	2.45608	1.86813	2.31169	1.65392		2.80568	2.79035	2.14534	1.99439	3.01524	2.9695
0.277678	0.287135	0.283647		0.25371	0.225002	0.326798																0.267302	0.221388		0.266262		0.207334		0.236244	0.251565		0.212873		0.213082	0.249243	0.255668	0.257607	0.351552	0.376876	0.455167	0.371338		0.380631			0.443643		0.388393
0.24391	0.303521	0.443123	0.612823				0.524927	0.58717	0.580269	0.476061							0.301546		0.287815		0.132372	0.183006	0.156802		0.126906	0.123919								0.12133		0.147646	0.207136	0.174482		2.45201	0.35353	0.331379	0.328687	0.352842	2.78974	0.378636	0.381721	0.39891	0.458127
0.315782	0.337276	0.381496		0.39099			0.371133										0.526007	0.455606	0.384793	0.397431	0.407812	0.423907	0.385064	0.421914	0.396749	0.419045	0.414294					0.383598		0.42483	0.424168			0.508091	0.564172	0.641919	0.63376		0.64864	0.640644			0.677533		0.710459
0.869991	0.869865	0.918896	0.841079	0.964664	0.798062										0.752982		0.50205	0.450226	0.484739	0.449704	0.384162	0.320506	0.298593	0.305735	0.339898	0.379762		0.483505	0.371658	0.624816	0.430447		0.485141	0.45613	0.499871			0.6244	0.752475	0.761009	0.801641	0.804267	0.727715			0.719604	0.662324	0.64873	0.640759
1.29357	1.24136	1.27778	1.32192		1.29776	1.28275	1.27042		1.21336	1.16068	1.1801	1.17983	1.11008		1.06993	0.99963	0.925893		0.875721	0.886097	0.808462	0.791132	0.842991			0.69019	0.657735	0.642238	0.629029		0.566541	0.530293		0.502401			0.44697		0.638298	0.684657	0.680356	0.676023	0.722464		0.712574		0.663823	0.648806
0.288645	0.353261	0.305443	0.319487	0.30893		0.375863	0.330499	0.289346	0.279939	0.282499	0.325259	0.252431	0.253441	0.26483	0.287193		0.26942	0.29596		0.300251	0.318588							0.332367			0.367602	0.362324		0.372586		0.362022	0.406355	0.432141			0.563753	0.641238	0.625331	0.622922		0.628431	0.648777		0.606474
0.40283	0.410839	0.423138	0.479084																												0.443769		0.441173	0.548067	0.40682	0.420604	0.425825	0.513542	0.598133	0.662962			0.62627	0.57845			0.602674	0.595952	0.555489
0.352322	0.421948	0.42997																		0.451329	0.58974	0.394929	0.500571	0.388708	0.388857	0.415315	0.431223	0.421009	0.381377	0.394287		0.396444	0.402599	0.406408	0.390362		0.401011	0.483295				0.571809		0.543306	0.50666	0.504394	0.482011	0.477672
0.670718	0.67625	0.698231		0.615346	0.538585	0.57225	0.587146	0.695672	0.651483	0.704853	0.709258	0.674889	0.681151		0.647806	0.771013	0.703108		0.672469	0.631486	0.628872	0.725581	0.734915	0.556688		0.566048	0.723881	0.687804	0.501738	0.555816	0.563502	0.580161	0.538858		0.611577	0.546464		0.765689	1.07394	1.27292	1.6994	0.71419		0.68626					0.657842
0.241917	0.258923	0.240893	0.169252	0.182605	0.172559				0.198675		0.288118							0.231754	0.21796	0.236305	0.224223	0.260385	0.235259	0.236018	0.2425	0.26587	0.242306	0.224914			0.235557	0.246346		0.228605	0.228178			0.288263		0.392934	0.391894		0.419941	0.426971			0.380514	0.377677
0.769789	0.773391	0.710922																					0.681937	1.02963		0.650077		0.749336		0.886929		0.880535	0.822553	0.890927	0.852185	0.841906	0.774767	0.857034	0.870989	0.863086	0.875235	0.834443	0.854533	0.855626	0.898271	0.924924	1.01792	0.965756	0.965596
0.335135	0.359711	0.347674	0.372068	0.365853	0.361624															0.27963	0.318151	0.340682	0.29324	0.305481	0.377909	0.349228	0.335824			0.400645	0.397344	0.401649	0.391745			0.366913				0.616626		0.61122	0.641043	0.617238		0.597461	0.606978	0.618534
0.177357	0.196298	0.228972			0.258086			0.267021	0.281069	0.312509			0.389496									0.53835		0.512481	0.527196		0.549527					0.549445	0.554924	0.554081	0.551328	0.584914			0.940726					1.0931			0.999266	1.02673	0.989491
0.357804	0.360168	0.367912	0.346944	0.358274														0.43922	0.416832	0.38263	0.411589		0.377257	0.360191			0.332313		0.327956		0.315504	0.311801		0.323981		0.306912	0.316517			0.451425	0.448542			0.482606	0.461748	0.484038	0.455812	0.48165	0.483462
0.597625	0.570494	0.528689	0.666027																		0.844285						0.700007					0.560036	0.683113	0.613656	0.654747	0.599717	0.579952	0.604166	0.560195	0.674701	0.578896		0.55746	0.569513	0.677669	0.584719	0.515984	0.55026	0.563334
0.468169	0.504786	0.501908	0.545938	0.56499	0.854522						0.681598										0.666008		0.692117		0.586547		0.540654		0.609724		0.600663	0.657579	0.713423	0.654811	0.605215	0.704576		0.614791	0.654765	0.716081	0.690578	0.704655	0.783014	0.756442	0.731548	0.691099	0.72607	0.715731	0.686533
0.726042	0.712219	0.900991			0.455944	0.516959	0.544327	0.47775	0.515984	0.544035								0.448933	0.529574	0.433633	0.529641	0.423837	0.39933			0.451967	0.468901			0.4656	0.514665	0.535529	0.552076	0.548345			0.51412		0.786055		0.842991	0.812381							0.962321
0.411979	0.404272	0.424481	0.440954	0.46118	0.438951																0.387652	0.374084	0.434371				0.381473	0.337059		0.315056	0.337971	0.319064	0.442794	0.361525	0.370443	0.397	0.404544	0.440587	0.519662			0.594118
0.33585	0.382264	0.387957		0.457552	0.439141		0.524633		0.439108		0.491853		0.439253		0.488916			0.315923	0.306402	0.300538	0.296157	0.307472			0.307721	0.298189		0.276304	0.303856			0.338466	0.347712	0.346601			0.37463	0.435845	0.510684			0.566727					0.570255	0.56869	0.550154
	0.934244	0.713995	0.659677	0.769981	0.904024	0.943166	0.884282	0.985092	0.999269	1.11243	1.03468	1.04978	1.63083	1.40524	1.37131	1.00579	1.27154			1.3527		1.02391	1.03918	1.0133	0.788761	0.747282	0.83436	0.582237	0.582011	0.582845	0.548143	0.544264	0.580192	0.504754	0.468126		0.408482	0.519242	0.467575		0.479365	0.490105	0.399825	0.529625	0.422879	0.474556	0.516678	0.581123	0.479796
	0.376695	0.355996	0.363482		0.371632	0.384469		0.734046		0.490063				0.546785		0.610793	0.420218	0.421907	0.428658			0.407083	0.450578	0.420798	0.434229		0.434795	0.404085	0.391167	0.402439	0.43146	0.481148		0.363134				0.451329	0.53603	0.535199	0.566252			0.566722	0.528285				0.531467
	1.68966	1.83084	1.40211	1.26379	1.30984	1.28323	1.1031		1.15416	1.03904	1.07613	1.0702	1.10701	0.880024	0.871808	0.847988	0.866765	0.584975		0.564866	0.566033	0.596479	0.520616	0.522835	0.454569	0.460694	0.505641	0.424199	0.450577						0.445634		0.448365	0.584656	0.680325	0.732154	0.756129	0.699297	0.718673	0.744142	0.772538	0.773683	0.739032	0.784467	0.82879
	0.410912	0.473216	0.439611	0.353021	0.388965	0.422798		0.338318	0.3554	0.402218			0.386642		0.351888	0.496247	0.419673	0.365018	0.387529		0.406171		0.485176		0.512669	0.554066	0.576421	0.605572	0.627731	0.632781		0.672495		0.663386	0.645884	0.65224	0.675508		0.842199		0.944441		1.03908	1.05127	1.06023	1.08588	1.07877		1.12265
	0.631018	0.754436	0.908043	1.23222											0.540015	0.477515	0.519116		0.610339					0.575384													1.18281				0.491128	0.593324	0.461018	0.489015		0.360491		0.324945	0.30597
	0.560345	0.538281	0.547428	0.561359	0.627742													0.594222	0.66055	0.607666	0.605445	0.677779	0.607583	0.627593	0.734059	0.619349	0.628073	0.628236		0.609842	0.610987	0.622543	0.538432	0.64101		0.640256	0.659684			0.904242	0.905377	0.866551	0.874966		0.958754	0.969962	0.971265	1.00585	0.957812
	0.532185	0.513046	0.532082	0.521646	0.493179	0.466848	0.710853	0.476897		0.509088	0.521218								0.558211	0.5551									0.700615	0.736278	0.63144	0.665995		0.748038		0.657469	0.706862	0.776712	0.831986	0.894105	0.897948		0.953893	0.988797		1.07496	1.10872		1.10822
	2.16531	2.18867	2.10871	1.90569	1.74675	1.636	1.72916	1.7865		1.74803	1.68933	1.65187			1.5849	1.42085	1.51895	1.14816	1.14341	1.31123	1.26472	1.10701		0.995116	1.15636		1.12387	1.09439	0.97954			1.05139	0.942418	1.0826	0.983208	0.726967	1.23946	1.57288	0.789467	1.10828	1.04345		1.03456			0.587444		0.616416	0.619527
	1.23266	0.840009	1.09708	0.989715			0.228019	0.257683	0.246844	0.282311	0.269223								0.271996			0.352044				0.300524	0.28641	0.270297	0.240893	0.282393	0.24325		0.246609	0.264023		0.268118	0.311768			0.427267		0.443429	0.42575	0.460336	0.497176			0.456578
	3.25282	3.86942	3.74294	2.84239		2.31071	1.73358	2.25587	2.16047	2.13906	2.23018	1.85596	1.46634	1.24586	1.74589			1.69594	1.56125		1.40827	1.37792	1.25756	1.24302	1.08594	1.0642	0.964092	0.970816	0.807018	0.955416	0.79028	0.756966	0.782662	0.792172	0.882057				0.95171	0.823728		0.906665	0.904584		1.01891		0.995876
		0.345329	0.388406	0.307521	0.405667	0.437334															0.536954		0.587413	0.496539	0.5201	0.484933	0.477054	0.510558	0.495001	0.42824		0.494273	0.481431	0.499816							0.763131			0.701024		0.670319	0.669213	0.682547
		0.256675	0.277592	0.279094	0.321876			0.359909	0.445519									0.357559			0.353307		0.381979	0.393243	0.392538		0.423435	0.40874	0.413398	0.403226	0.403659	0.396323	0.406358	0.400541	0.403747	0.401452		0.545673				0.668294		0.625937	0.612249	0.611133	0.594236	0.585133	0.605846
		2.02272	1.59219	2.09184		1.89252			1.73704		1.64493			1.80869	1.77338	1.78127		1.59906		1.6467	1.49103	1.4945	1.51884	1.47139		1.50416		1.51916	1.53088	1.71547	1.47537	1.6135	1.55116		1.52772	1.68455	1.02871			1.57091				0.947126		1.44753	0.870153	1.17829	0.563483
		0.232965	0.254832	0.282238		0.317158												0.361762		0.659671	0.363824	0.407929	0.322591	0.327982	0.293489		0.305227	0.313582	0.304993	0.293797	0.299999	0.286361	0.299875	0.270681	0.305665		0.413524	0.376529	0.46018	0.481908	0.453701	0.570463		0.448737	0.435025	0.857544	0.444158		0.552365
		0.373883	0.303096	0.312951	0.26074		0.286644											4.82263							0.548781	0.568219	0.569665		0.591638	0.594117	0.573808	0.586485	0.606382	0.622974	0.62357	0.620275	0.675825	0.762907	0.870079	0.931254	0.983702	0.991141		1.05367	1.08298			1.19501	1.17793
		0.885779	0.975239	0.890962	0.864527	0.91207	0.812689	0.781479			0.749771		0.72177	0.633488	0.624692							0.456094							0.40891	0.429436	0.435021				0.426038			0.547373	0.663152		0.752653		0.702093	0.680148	0.671897			0.666593	0.686263
		0.419953	0.409025	0.427817		0.415901		0.433196	0.483866		0.499049	0.559412	0.568257	0.504836	0.433126	0.460713	0.412456	0.506632	0.487389	0.401195		0.432902	0.359414	0.367246			0.491498	0.517368		0.566602	0.5445	0.485036	0.697338	0.517223			0.497214		0.512616	0.54602		0.57044	0.618342	0.546555	0.642032	0.595876	0.69802		0.644169
		0.346567	0.36534	0.34948	0.354764	0.337268	0.367158		0.36629	0.356543		0.415432					0.406926	0.381025		0.412685				0.368644		0.383919	0.392227	0.359223		0.369119	0.379759		0.376295	0.365388	0.41702	0.388713	0.431101	0.534768	0.556275	0.594809	0.627185	0.621583	0.663169	0.659581	0.694947	0.70221	0.700524	0.70886	0.708955
		0.388982	0.363396	0.305755	0.292825				0.708112	0.440775	0.374963	0.347158	0.330257	0.349647	0.460287			0.44191		0.581843	0.631997	0.668809	0.687997	0.657472		0.656911	0.633901	0.751954	0.657171	0.604629	0.643163		0.682528	0.634702		0.81169	0.853273	0.954271	1.01574		0.961017	1.05582		1.0832	1.13283		1.05857	1.09562	1.07832
		0.616066	0.555266	0.61863		0.697276	0.679045	0.622373					0.610403		0.569761	0.628945	0.540701	0.544317	0.462465		0.387795	0.375806	0.375618			0.391525	0.398021			0.485602				0.570497			0.6521	0.811209	0.918395	0.932162	0.946865		0.910969	0.906153	0.922023				0.891331
			0.421162	0.469729	0.458054		0.447762	0.443378	0.412952	0.547663		0.43753							0.432561	0.484413	0.546355	0.501208		0.44598	0.44575	0.44438	0.432814	0.446366	0.472992				0.459632	0.466255	0.447629		0.519623	0.680597		0.854627	0.824457			0.701092	0.670941	0.655116	0.638158	0.625712
			5.80247	5.92971	3.61052								4.79227			4.91109	5.82623	5.17118	5.36309			0.283241	0.294911	0.298294		0.255565	0.201653	0.198272	0.186791	0.201691	0.178711		0.174911	0.172846	0.167864	0.170648	0.183377	0.216253		0.264948	0.267536	0.283012	0.285334	0.29973		0.324115	0.305984	0.309659	0.317584
			2.45614	2.35511	2.34109		1.75818	1.48469					1.60587					1.17264	0.607806	0.706627		0.659416	0.497434	0.401304	0.445877	0.361359	0.385074	0.330958	1.75258	0.406218	0.395198	0.393164	0.423267	0.272217	0.332516	0.373994	0.393881	0.497301	0.473852	1.12017	1.27177	1.05961			0.589584	0.642281	0.658087	0.692498
			0.337775	0.343559	0.326334		0.397298									0.449567	0.378192				0.308807	0.339507	0.325418	0.327694	0.346651	0.344226	0.353122	0.398242	0.379651	0.408037	0.410776		0.437936	0.43693	0.450276					0.738861							0.758105	0.690839
			0.40999	0.40417	0.380542	0.444243		0.372819	0.384099			0.339619		0.375816		0.310361	0.296581	0.292086	0.276223	0.268957	0.275762	0.243468	0.25028	0.26157	0.282268	0.277937	0.289111	0.291053	0.277252			0.248981					0.24602		0.322664		0.367972	0.372991			0.38759	0.357807	0.359753		0.366573
			0.545333	0.57087	0.517612				0.388663	0.39554	0.407281	0.40885	0.420134	0.407273	0.37486	0.42408	0.428806		0.399643		0.409774	0.459361		0.464123	0.508392	0.483665	0.479603	0.497508	0.456052	0.451204	0.463515		0.473019	0.469302	0.470389				0.658525	0.742027	0.795938	0.79305	0.808987	0.841131		0.869862		0.929796	0.925488
			0.551815	0.536281	0.579192	0.565627	0.580852	0.536198	0.56364	0.501479	0.523117	0.618936	0.510297	0.508823	0.584366	0.530143	0.452192	0.427248	0.454662			0.452897		0.400047	0.395135		0.440233	0.419712				0.377243	0.365994	0.357792	0.360704	0.341107	0.394813			0.545455	0.569767	0.574676	0.588185	0.597742	0.588644	0.593379	0.594993	0.595222	0.58939
				0.113747	0.152648	0.165452	0.138567	0.184024	0.135374										0.391428		0.321461	0.298433		0.390618	0.410732	0.344226	0.421362	0.341756	0.434509	0.377502	0.381227	0.376416	0.402627	0.366005	0.387791		0.439445	0.538401	0.607771	0.621062	0.62864	0.627301	0.602299		0.619722	0.668361	0.72716	0.775545	0.838659
				0.391412	0.343364	0.338779		0.432657	0.500348	0.440473			1.31533	1.40172	1.11853		0.497374	0.444619	0.521906		0.391571			0.39617		0.373227	0.36934	0.329256	0.368268	0.368847	0.314033		0.357027	0.319316		0.294487	0.266881	0.449613		0.498977	0.510004	0.456482	0.483789	0.470048	0.472508	0.535978	0.475449	0.48457	0.548619
				0.412093	0.431541	0.425994	0.479039		0.517113	0.481659			0.379328	0.534156		0.315358	0.299692	0.301654	0.293414	0.277386	0.270777	0.233853	0.245697	0.220791		0.195873	0.212616	0.212316	0.215587	0.213161	0.20742	0.22168		0.229154	0.234392	0.24838	0.249093	0.340292	0.47207	0.515571		0.47944	0.484404		0.46254	0.437193		0.453307
				0.420648	0.378193	0.412089		0.375764	0.349667			0.371672	0.327598	0.365848	0.431779	0.313228	0.301805	0.241742				0.245219	0.251499	0.252147	0.255293			0.28975	0.3068			0.356002		0.338373	0.350981		0.408036	0.543141	0.690475		0.792939	0.79384		0.743002		0.764249		0.784219
				0.522046	0.507763	0.55133																					0.395074	0.387697	0.496183		0.454949		0.436741	0.438139			0.552796		0.639332	0.746866	0.710445	0.720208	0.769257	0.793708	0.822882	0.798058	0.805888	0.845653	0.849789
				0.501448	0.506111	0.558099	0.630107	0.640741		0.646628	0.589211					0.517506	0.566686	0.5516	0.480555	0.475083	0.606305	0.470532	0.439138	0.447074	0.424059	0.440549	0.457694	0.404267	0.392468	0.391778	0.373816	0.361689	0.34461	0.355988	0.352375	0.359111	0.416638	0.548206	0.653139		0.728662	0.737841	0.729747			0.813988	0.833901	0.840648	0.838892
				0.279681	0.315067	0.436597			0.536432	0.268086	0.534477	0.420947		0.68375	0.637828	0.601424	0.685135	0.729445	0.668073				0.733273	0.521467	0.527566	0.913949		0.709945	0.715321				0.562127	0.377586		0.482769	0.284105	0.312286	0.417514		0.663083	0.342325		0.329711	0.343727	0.489696	0.31139	0.293517
				0.366916	0.341595	0.366748	0.355529	0.325097	0.373787	0.350075	0.37031	0.404212	0.405263	0.439294		0.401548	0.401408						0.389756			0.424179	0.43434	0.419024	0.433699	0.457462	0.439989	0.461649	0.464683		0.464737		0.489119	0.576019	0.657698	0.696177	0.725672	0.755206		0.775269		0.828518	0.856931	0.865333	0.85736
				0.274098	0.264949	0.272332	0.278748	0.291998	0.28615		0.310972					0.389785																		0.292693	0.423387	0.417062	0.380345		0.403417	0.425424	0.441543	0.448495	0.42346	0.438126		0.505378	0.481974	0.518417	0.518611
						2.37605	1.32073	1.25284	0.622437	0.731669	0.63831	0.580759	0.625359			0.470505	0.387507	0.431615	0.419707	0.399678	0.379445	0.350655	0.336295	0.394807			0.211847	0.220111	0.223544		0.208435	0.231663	0.247587	0.270921	0.279849	0.288524		0.410869	0.335817									1.26624
					0.459216	0.490178	0.445734	0.483951	0.493643	0.482831		0.450859	0.568106	0.499892	0.565792	0.472729		0.442095		0.419075	0.413436	0.425999	0.396036	0.395144	0.441512	0.407358	0.412294	0.400873	0.424968	0.411204	0.414342	0.429178	0.429744	0.434735	0.441471	0.450344		0.531422	0.560614	0.604668	0.625941	0.605641	0.634245		0.628449	0.622321		0.615618	0.637859
					0.315083	0.3177	0.292128		0.279459	0.28133			0.255745		0.220126	0.233779		0.199276	0.204776	0.202398	0.212695			0.203138			0.197444		0.194643	0.183031	0.182055												0.410427	0.414928					0.414631
						0.458877	0.470937	0.480879	0.457989	0.507536		0.51965	0.516709	0.552745	0.506433			0.52327		0.541946	0.492299	0.51159	0.486438	0.514604	0.529298	0.546662	0.550213		0.554812	0.584264		0.589463	0.599374	0.6098	0.614777	0.645324	0.660305	0.789063	0.892676				0.874532			0.809432
						0.199762	0.261368	0.235836	0.288647		0.255881	0.259694				0.307896	0.289213		0.335269	0.306372		0.295681	0.339486	0.314585	0.321757	0.318355	0.332616	0.300283	0.298745	0.293484	0.34022	0.31111	0.321817		0.285437		0.265265	0.382802	0.536484	0.574699			0.488091	0.509352		0.328388
						0.509231	0.462289	0.437745			0.459933		0.421446		0.364742	0.400253	0.372127	0.314484	0.300538	0.280295		0.285329	0.258598	0.276105	0.267336		0.277681						0.304595	0.29494	0.340062	0.343717	0.349977	0.51467	0.677252	0.704176	0.707313			0.851371	0.792648	0.782566	0.755876	0.777469	0.763738
							1.5811	1.52682	1.53659	1.51593		1.44114		1.53913	1.719	1.33613	1.5375	1.96469	1.5066	1.61896	1.33857	1.19848							0.616251				0.506897		0.60454					0.803531	0.819741	0.808631	0.860043	0.874498	0.898752	0.937661	0.90262	0.964211	0.903537
							0.440973	0.443862	0.373582	0.39102	0.453857				0.397161	0.389662			0.310713	0.337569		0.321734	0.337931	0.342209											1.9906		1.57462	3.00422			2.2533	2.60547		2.30641	2.76103		2.70106		2.72762
							1.00521	0.917637	0.856047			0.803711		0.740894	0.650639	0.599967	0.554254	0.525591	0.517004	0.469002	0.450738		0.397634	0.366466	0.358473	0.358022	0.344605	0.357282			0.402059		0.390323	0.399276			0.43237					0.598278	0.579335	0.604448	0.599831	0.556544
							0.296829	0.286994	0.30501	0.317919	0.31232		0.34338	0.325528		0.371663	0.34197			0.352189	0.334125		0.38383			0.416472			0.411039	0.406004				0.403877	0.397876			0.51864	0.617793	0.654965			0.785922	0.787777		0.861222		0.98267
								0.725055	0.939534	0.907972	0.903142			0.890157	0.769399	0.742092	0.727788	0.760035	0.718933	0.651825	0.651109	0.737972	0.794382	0.748719	0.776666	0.85379	0.889401	0.795911	0.834764		1.59099		0.971703	1.07628	0.724979	0.817426	0.491168	0.446263				0.309949		0.664636	0.874705			1.05461	0.907965
								0.35845	0.28969	0.359479								0.339332										0.52024	0.331696		0.443204	0.302084	0.267126		0.293774	0.345184	0.340115	0.408432	0.500073	0.478577		0.482869			0.433574			0.507909	0.435266
								0.212094	0.198621	0.19808		0.16086	0.187918	0.192086	0.21661	0.195706					0.151741		0.152344			0.158498		0.172492	0.175387	0.192431	0.179001	0.183292							0.290061						0.358421	0.356757	0.364721
									0.255849	0.307002	0.280948	0.296808	0.293726	0.325329	0.27845	0.29092	0.264024		0.29682						0.244985		0.255163		0.235441	0.229003	0.223568	0.221938	0.24018	0.251871	0.239216	0.243131				0.515623							0.445305		0.459691
										0.260242	0.26966	0.339988		3.70058	2.95002	2.55143	2.3157			2.21275	2.21848	2.27492																			0.776279			0.854887		0.863538	0.906825	0.917906	0.906486
											1.65227	1.43015	1.45448																			1.35677	0.61106	0.95535		0.373609		0.412035	0.422001	0.493768		0.486583	0.546779		0.507945		0.446984	0.453745	0.418019
											0.861692	0.785595	0.608124			0.470357	0.555049	0.356489		0.292947	0.255713				0.253162		0.228503		0.221475		0.218148	0.252672	0.247471						0.358239	0.365793	0.389195			0.37719	0.381795	0.395827		0.402905	0.39321
											0.420479	0.434896	0.409897	0.414035	0.383948			0.369444	0.405901	0.441679	0.491291	0.440581	0.452772	0.494291				0.52321	0.522779	0.493605	0.505564	0.493213	0.478409	0.485149	0.463812	0.449821	0.501953	0.530105		0.62636	0.620297	0.659882		0.681539	0.730483	0.772384	0.789087	0.795988	0.820522
													0.533315	0.547033	0.545469		0.542134	0.546269							0.51263		0.481702		0.526051		0.556993			0.597259			0.676316		0.895553			0.972894	0.975639	1.00404	1.04615	1.05067	1.1327	1.18461
															0.310158	0.332254	0.309893		0.238095	0.267768	0.243136	0.232262	0.246012	0.270409	0.252784	0.264884			0.276409		0.27647		0.273037	0.291866	0.309087	0.316544	1.08051	0.370848	0.471978	0.507474			0.584162					0.639439
																0.328664	0.307213	0.318314	0.285902	0.299174	0.27202	0.269086	0.284965	0.264103	0.237461	0.242563	0.241268	0.218918	0.220219	0.239012	0.236706	0.258181	0.260304	0.245198	0.270984	0.266578	0.27868		0.445562	0.436847	0.440801		0.463373	0.450406	0.441055		0.423741	0.39613	0.388893
																0.495308	0.471428	0.464269	0.513538	0.509268	0.431223		0.547476	0.485853			0.509026	0.507521				0.647445	0.628039	0.660344	0.592183			0.777214							0.362898	0.374199	0.363729	0.308578	0.370841
																0.667685	0.598383	0.644442	0.661067	0.634263		0.639662	0.65297	0.627791		0.57493	0.5865		0.541026	0.543822	0.476245	0.449021	0.449683	0.449587		0.43404	0.503862				0.90968	0.898023	0.908348
																		0.764741	0.81715	0.897952	0.712251		0.726943		1.16657	0.690518	0.715583		0.77378		0.690864		0.717613	0.684546	0.680586	0.740576	0.633616		0.843374	1.04011		1.13264		1.10674	1.17768	1.27673	1.44316	1.53024	1.42341
																		0.758137	1.38008	0.8841		0.87914	1.10253	1.12391		1.0468	1.15614	1.02784		1.18063	1.08653	1.04766	1.09624	1.25656	1.07999	1.31764		1.36748		1.55573	1.58958	1.64056	1.6365		1.58928			1.66475	1.70426
																		0.633777	0.880254	0.6841	0.692586	0.729712	0.756331													0.690716					1.31748			1.0772	1.14028	1.26114	1.25393
																			0.194772	0.231925	0.301294	0.17484	0.17899	0.30484	0.169016	0.173117	0.151472	0.151264	0.151935	0.154177	0.157341		0.174645	0.188418	0.192229	0.191214	0.210607	0.298108			0.379419	0.374414	0.378087			0.330582	0.338638	0.345786	0.345659
																			0.32826	0.305577	0.297708		0.291469	0.277308					0.363982	0.412723	0.385886			0.424074		0.47392										0.580194			0.630148
																				0.713119	0.724863	0.508331	0.528169		0.554333		0.463403	0.541001	0.457334	0.476793	0.469056		0.489741	0.453803			0.528538			0.882183	0.86371	0.8065		0.788452	0.839403	0.85938	0.902256	0.89874	0.903683
																				0.532135	0.500736	0.488841	0.487482		0.45856	0.45461	0.425992	0.445872	0.449326	0.471152		0.505596	0.503734	0.552697		0.541998	0.59352	0.682523	0.754363	0.782664	0.794024	0.849678	0.917753	0.833477	0.807097	0.803671	0.798552	0.765449	0.774913
																				0.566318	0.54798	0.562146	0.586519	0.65991		0.587785		0.627972	0.577942		0.591097	0.585219	0.637643	0.603604	0.583005		0.617193				0.84665	0.868732		0.949492	0.920681		0.92679	0.904315	0.939988
																					0.372086	0.362997	0.37317		0.382257	0.386575		0.421192			0.451673	0.508111	0.455417		0.481284				0.66453	0.686314	0.688517	0.72578	0.741533	0.795083	0.800135	0.75467		0.71056	0.76838
																						0.547459	0.589873	0.490009																	0.765092	0.82336	0.811084		0.797377			0.809157
																							0.317775	0.315835	0.339514	0.274041	0.284979	0.297166	0.325961	0.367456	0.277692	0.330126	0.253659	0.282201	0.316993	0.285447	0.336547	0.334314	0.396648		0.409632	0.417819		0.429837		0.437611	0.449045	0.446284	0.439285
																							0.569639	0.721932	0.444235	0.380532	0.828847	0.280887	0.313399	0.428231	0.32984	0.295426	0.3159	0.376999	0.325508	0.403038	0.420891	0.324173			0.511103			0.53206		0.574999	0.548872	0.542391	0.523927
																							0.297609	0.355806	0.294394	0.274898	0.261291		0.303045	0.30048			0.281347	0.278654	0.307242	0.326933		0.427201	0.500114		0.567991								0.678404
																							0.268916	0.222351	0.208141	0.270321	0.203183	0.227624	0.208457	0.215807	0.231169	0.203394	0.214438	0.215978	0.228808	0.238088		0.420197	0.570547	0.611551	0.59599		0.57463	0.560072	0.54572		0.553046	0.546006	0.545868
																							0.316022	0.245411	0.245077	0.237752		0.265241	0.250719	0.263351	0.252066	0.284758	0.262121	0.27348		0.252869			0.326191					0.194892				0.131278
																							0.404413	0.437205	0.428227	0.43646	0.445985					0.456421		0.489729	0.48445	0.499417	0.522688		0.698932	0.711279	0.71487	0.699681		0.754353	0.696581	0.719557	0.729826	0.754014	0.699615
																							0.667233	0.65031	0.613818	0.658135	0.640866	0.600113	0.711375	0.634389	0.658573	0.63415	0.645525	0.655451	0.711128	0.722503	0.789203	0.903903	1.11506	1.12512	1.0706	1.09123	1.12643	1.11562	1.18035	1.26227	1.29822	1.43971	1.44565
																								0.860148	0.720843	0.823684	0.706603	0.655356	0.814458	0.808862	0.61652	0.775241	0.731773	0.762395	0.675294	0.706515	0.90411	0.952851	1.0082	0.96665	0.958654	0.930085	0.97072	1.0335	1.0537	1.07372	1.08674	1.14967	1.21878
																								0.782374	0.783653	0.826861	0.805429	0.874025	0.829431	0.865951	0.826785	0.876328	0.885299	0.906057	0.994009	0.947513	0.884159	1.07026	1.17021	1.26343	1.24224			1.19097		1.20026	1.16217	1.18146
																								0.360768	0.394139	0.420893	0.372594	0.418809	0.413141		0.402218				0.380282	0.405318		0.54316	0.656969	0.684885	0.672234			0.615384		0.563805			0.617868
																								0.441302	0.553216	0.437541	0.468489			0.463203		0.523321	0.447636	0.432906	0.439005	0.446817	0.500239		0.602824	0.673807	0.678687	0.746604	0.750534	0.786668	0.786595			0.919657	0.983714
																									0.595184	0.50532	0.445477	0.488474					0.445731	0.45681	0.442374		0.454647			0.676298	0.751988	0.749893	0.777095	0.795152		0.80349
																									0.369462	0.294864	0.324005	0.270778	0.279402	0.243043	0.236344	0.222186	0.217727	0.208181	0.185842		0.2386	0.284705	0.309651	0.285359	0.326577	0.303015	0.325769	0.307895	0.270099	0.306371	0.312943	0.318454	0.327121
																									0.295924	0.314384	0.324923		0.319687	0.310382		0.302933	0.295998		0.33227	0.325224				0.449434			0.543485		0.608986	0.573851	0.554047	0.589851	0.556301
																										0.449931	0.408172	0.42055	0.404936	0.443974		0.418578	0.407563	0.348313	0.36563		0.452759	0.530842	0.622935	0.68452	0.683749	0.654736				0.625823			0.671827
																											0.303762	0.294412	0.324858	0.343408	0.32949		0.363534	0.383054	0.384738	0.389292	0.417573		0.752967			0.822136	0.826342					0.949924	0.948259
																											0.486628	0.398547	0.418504	0.425181	0.419901		0.426548	0.385701	0.40195			0.509977	0.620777	0.666596	0.673904		0.711086	0.700357	0.71566	0.729261		0.707721	0.694369
																											0.418474	0.386657	0.410297	0.366359		0.378408	0.381902	0.367072	0.393286		0.43091		0.537034	0.557193	0.590258	0.582732	0.620729	0.646126	0.627956	0.619721		0.702316	0.681302
																											0.259138	0.335248	0.267479	0.262087	0.226027	0.247477	0.243444									0.347004		0.395404	0.437196		0.476358		0.553978
																											0.545534	0.554963	0.566325	0.545228	0.618641		0.615285		0.623417	0.6062	0.647296	0.7165	0.798725	0.834531	0.840876	0.886862		0.922136	0.993182	1.04094		1.19198	1.19514
																											0.305375	0.371923	0.309595		0.332587	0.466921			0.573623	0.549617	0.468652					0.525197		0.562179	0.527549	0.505623		0.47521
																												0.686961	0.53803	0.574963			0.524118	0.519384	0.497056	0.526183		0.663803		0.756694	0.812742	0.800815	0.784519	0.793621	0.816944	0.770834	0.756646	0.752219	0.705856
																													1.41262	2.01678	2.27841	2.31509		1.69622		1.62201	1.68272	2.75815	2.94934	3.08538	3.11958	3.25182	3.84566	3.86299	3.92602	4.65574	4.82099	2.64558	2.85284
																												0.415367	0.374484	0.446383	0.379878	0.408844	0.371852	0.3555	0.384115		0.396942	0.504373	0.547805		0.614894		0.566522		0.646661	0.693689
																												0.890133	0.791952	0.694242			0.838338	0.773201							0.916752	1.28574		1.46292	1.14274	1.43397
																													0.985162	0.970627	0.955726	1.03064	1.01451	1.09288	1.14249	1.07444	1.20268		1.35714	1.6674	1.59505	1.65331		1.97136			2.08388	2.3144
																													0.610882	0.70252	0.686505		0.705486	0.778417	0.801567		0.931465	1.09335		1.35734	1.5557	1.62832		1.57916	1.70378		1.69283		1.73302
																														0.660171	0.711855	0.623469		0.721285	0.685285	0.655999		0.799147					1.0928				1.19366	1.18746	1.23454
																														0.296052	0.294617	0.294169	0.305407	0.286041	0.280618	0.266311	0.269269	0.315042	0.379437		0.455084	0.488721	0.498177	0.529396	0.50964	0.556178	0.545635	0.607664	0.580596
																														0.319865	0.373667	0.347884	0.299767	0.324874	0.425525	0.556259	0.427557		0.505366	0.679552		0.672966	0.623445			0.82322		0.75096	0.672052
																															0.92198	0.992089	0.973461	0.989955	1.08545	1.97236	1.16836	1.30053	1.47896	1.86594	1.63992	1.6952	1.52238	2.05294			2.14056	2.12208
																															0.349798	0.364388	0.38909		0.413782	0.4067	0.502457			0.893104	1.00687	1.0481				1.21634	1.20941
																															0.757687	0.744104	0.792198	0.82868	1.11131				1.12739	1.48421	1.28822			1.56432			1.55908
																																0.527483	0.637857	0.475573	0.497576	0.588594	0.622909				0.665978			0.527889	0.570482	0.557034		0.513723
																																0.660921	0.66828	0.71116												0.960143
																																	0.493008	0.496651	0.478421			0.637672	0.739783	0.836685		0.733374	0.777107	0.713251	0.67612		0.710321	0.950421	0.691054
																																	0.445316	0.444903	0.479029	0.427314	0.481368	0.491228	0.447747	0.43105	0.402165	0.388521	0.332022	0.274574	0.300171	0.280359	0.25652	0.253945
																																	0.914966	0.844338	0.84364		0.788422		0.983283		0.860273	0.870068	0.922382	0.947211	0.973037	0.965875	0.991006	1.00131	0.982637
																																	0.808678	0.794133	0.917966		0.844485	0.883825	0.897327	0.845706	0.907029	0.920643	0.90483	0.815974	0.854484	0.854203	0.893445	0.941772	0.954336
																																		0.377663	0.255256	0.317476	0.405855	0.393759	0.403512	0.506948	0.446988	0.493815	0.330286	0.361238	0.336391	0.358165	0.394078	0.403803	0.447535
																																			0.150591	0.0984571	0.173672	0.212228	0.331388	0.360976	0.426952	0.399142	0.347063	0.321885	0.32035	0.232466	0.26167	0.28357	0.307625
																																				0.353204	0.453873	0.563603				0.906378		1.09693	1.2867		1.06664	1.17268	1.39657
																																					0.338829	0.439744	0.534919	0.456117	0.470392	0.35046	0.423203	0.450734		0.360345	0.43412		0.385681
																																					0.315697	0.45849	0.594602		0.640307			0.706483		0.745102			0.813726
																																					0.212667	0.29962	0.383074	0.379617	0.409005	0.386729	0.408721	0.349883	0.330728	0.370929	0.371442	0.498785	0.357073
																																					0.284321	0.292173	0.487872		0.320679	0.282066	0.298631	0.323108	0.33828	0.325281	0.332319		0.342853
																																					1.12778	1.23965	1.17015
																																						0.848245	0.870186	0.917523	0.922257	0.976215	0.990079		1.01417	1.05242	1.02572	1.06862	1.0322
																																						0.876218	0.672591	0.690403	0.677521	0.685055	0.712308	0.642146	0.655073	0.745707	0.770455	0.797385	0.79183
																																						1.5772	1.98333	2.309		2.069	2.43206	1.77831	2.45886	2.17681		2.38425	2.44021
																																						0.772992	0.753823	0.814233	0.826312	0.817697	0.835044	0.857739		0.861023		0.892867
																																							1.23884	1.31068	1.16086	1.56735	1.67311	1.65773	1.6574	1.71093	1.80394	1.7432	1.60488
																																							0.754669	0.757442	0.722419	0.741196	0.724501	0.740136	0.713197	0.749579	0.761135	0.738965	0.729755
																																							0.330218	0.427182	0.449797		0.384307	0.427056		0.406251	0.420002	0.412141	0.408995
																																								0.79301	0.745921	0.781435	0.760585	0.748535	0.780792	0.742157	0.798805	0.803988	0.813585
																																								0.70286	0.619481		0.562445	0.692062	0.513574	0.475742	0.489004	0.613148	0.510284
																																								0.940432	0.823901	1.01249	0.904205	0.846121	0.833659			0.789458	0.746505
																																								0.504369	0.52573	0.491774	0.507467	0.461355		0.488194	0.504899	0.453622	0.435696
																																										1.54131	1.42635	1.60588	1.76985	2.24739	2.2032	2.09313
																																										0.938938	0.944124	0.951084	0.936737	0.936811	0.984897	0.943183
																																											0.926225		0.980312	0.94131	0.861179		0.987199
																																											0.634915	0.617889	0.675107	0.723386	0.674928	0.698262	0.787164
																																											1.96481	1.74648	1.82205	1.64433	1.80215	1.86133	1.87615
																																											0.396138	0.401868	0.439519				0.467751
																																												1.33491	1.97446	1.90463	1.69317	1.85916	1.82542
																																												1.37534	1.46642	1.40162	1.33057	1.47708
																																													0.656242	0.684584	0.666872	0.719131
																																														1.30918	1.29836	1.27958	1.21765
																																																	0.899411
																																																	0.848922
																																																	0.476062
																																																	1.85641




Treated with: 0.01xEAA
Replicate 1, Treated at time point 36
0.409593	0.402041	0.407741	0.418121	0.40856	0.425933	0.394747	0.384943	0.378101	0.361667	0.364569			0.354918	0.390795		0.476599	0.427856	0.380874	0.392359	0.372272	0.370426	0.424894		0.380533	0.401226	0.426708	0.410356	0.406806	0.427505	0.443433	0.435756	0.458042	0.58096	0.455037	0.463504	0.478865	0.55387		0.658843	0.716714	0.798408	0.793041	0.821666	0.822065	0.868443	0.817967	0.831632	0.818577	0.774608
0.475392	0.533109	0.529296	0.569611	0.557263	0.568204	0.665182		0.584517	0.643242							0.746914			0.688691			0.624833	0.60637	0.5978	0.587727	0.63317		0.564591	0.554101	0.576924	0.568042	0.561734	0.613009		0.652604	0.574359	0.697658	0.755521	0.94824	0.904869	1.02365		0.977419	1.0067	1.00442	0.980701	0.99655	0.939928	0.946965
0.986128	0.803489	0.877862		0.866978	0.940584	0.849753	0.798851	0.781532	0.77053	0.767017	0.728502	0.665552			0.667		0.547315			0.510838		0.528744	0.531054	0.544804	0.490957		0.500312	0.528823	0.539034			0.560777			0.555285	0.594825	0.635885	0.812788	0.935194	1.08443	1.13622	1.20435	1.18005	1.23465	1.22505		1.25105	1.20902	1.23889
0.324893	0.367139	0.582715	0.866834	0.536525		0.654556	1.25846	2.93969	2.66905	2.23436	2.30325	2.30556	2.40074		2.11519	1.90192	1.72593	1.7681		1.57016	1.41007	1.35571		1.21714		1.04453					0.757831		0.679209		0.602296	0.530519	0.512941	0.644606	0.860942	0.956707		1.10267	1.14599	1.23065	1.30198		1.32611	1.44532
0.445772	0.448107	0.546411	0.600478													0.598096	0.495832	0.473608	0.544901	0.483666	0.484079	0.511045	0.490335	0.466787		0.481064	0.476733	0.475433		0.482653	0.444178	0.456146	0.45554	0.439168	0.451189	0.454629		0.542966	0.578191	0.65426	0.675103	0.670718	0.658732	0.642028		0.649213	0.673234	0.691208	0.704177
0.459854	0.45049	0.431904	0.412814	0.467239	0.462768		0.424716	0.425966	0.473977	0.576586			0.452035		0.451243		0.427289	0.451912		0.3891	0.370475	0.4569	0.372736	0.396967		0.437692		0.443752		0.456361	0.542651	0.410304	0.471557			0.535935	0.447234			0.781785	0.807648	0.788058	0.856825	0.81158	0.856939	0.868525	0.840326		0.927801
0.456154	0.479139	0.444541	0.431793				0.481163	0.438956		0.453279	0.553595			0.50603			0.540958	0.471978	0.502521	0.444658	0.461979		0.347585	0.4274				0.344129	0.342221	0.364792	0.370904					0.520708			0.615876	0.569402		0.620312	0.607721	0.646358	0.680344	0.681646	0.797532	0.79758	0.807753
0.479856	0.478223	0.453714	0.450837		0.434683	0.456922	0.441923	0.41719	0.415838	0.427844	0.365802	0.394267		0.481114	0.493292	0.533883	0.506477	0.446227	0.561059	0.457703	0.478075		0.591548	0.557914	0.589794	0.511151	0.534842	0.538862	0.536289	0.527816	0.529951	0.519693	0.514476	0.510449	0.563856	0.552178		0.620825	0.757999	0.788424	0.75871	0.704569		0.663611	0.676377	0.65584	0.693532		0.658649
0.442486	0.443507	0.556961	0.542778		0.639309					0.722268															0.474799	0.767257	0.437487	0.434098	0.456361	0.444885	0.430276	0.433291	0.425277	0.425455	0.406146			0.518115	0.61726	0.674288					0.65771				0.66225
0.319147	0.324303	0.298994	0.301944		0.308078	0.318657	0.294123	0.306297		0.326826	0.345393	0.286359		0.323056					1.44388	1.6391	0.97538								0.930375	1.28037		1.4187	0.819784		1.03896	1.29376	1.57477	0.446038	1.33333	1.39982	1.50424	1.47459		1.45594	1.45531		1.5152
0.744672	0.697625	0.637282	0.708221				0.60883											0.777647	0.74887		0.856679		0.802329	0.815665	0.884475	0.857592	0.757051	0.742193	0.763685	0.78915	0.710903	0.771987	0.807619		0.809075				1.02832					1.13523	1.22989		1.07155	1.08378	1.06938
0.396459	0.421862	0.416737	0.441105	0.455445	0.55217	0.493285			0.700456								0.576204				0.437219	0.402312	0.425906	0.412047	0.364283	0.379315	0.374031	0.397844		0.399463		0.452413	0.483071	0.449623	0.491433	0.498256	0.523136	0.606372	0.719016	0.896686		0.996662	1.01798	1.09682	1.0626			1.1469	1.14291
0.191128	0.206813	0.216741	0.203884	0.227418		0.20991	0.225595	0.216629	0.208394	0.228966	0.242654	0.202242	0.233039	0.211401	0.228924	0.244481	0.204741	0.224893	0.226947	0.225844	0.219236	0.227353	0.211756		0.229409	0.216831	0.224329	0.231761	0.23816	0.233647	0.242478	0.248872	0.241731	0.2551	0.252716	0.256102	0.283437	0.298882	0.307194	0.29929	0.298168	0.290003	0.291073	0.304213	0.308526	0.318467	0.30684	0.306699	0.284204
0.308311	0.281598	0.291646	0.311499	0.397186	0.401923	0.385208	0.391835			0.472064									0.359397		0.327809	0.289988	0.312656	0.284809		0.30933	0.280384	0.412627	0.31131	0.290083	0.313634	0.29415	0.317141	0.292354	0.298648	0.308885	0.342026	0.371849	0.409306	0.394786	0.351367		0.374465	0.385713		0.404245	0.410126	0.386211	0.411738
0.636605	0.629	0.613735	0.645752	0.712678	0.738853	0.756396	0.825149	0.797046			0.909071		0.865505				0.878114	0.817799	0.804315	0.804181	0.772938	0.709381	0.738858	0.802132	0.738863	0.744093		0.743762		0.770687	0.752452	0.805186	0.808846	0.801297	0.82341	0.755503	0.82496	0.932126	1.07706	1.17529	1.18202	1.21289	1.20312	1.26596	1.2719	1.21367	1.28987	1.36072	1.39309
0.335224	0.343811	0.31192			0.36223			0.347982	0.306816		0.313532	0.172574	0.305453															0.386314		0.432745	0.423638	0.444256						0.913993	1.12301	0.94012	1.02683						1.00776
0.523602	0.547108	0.555684					0.612429											0.812853	0.646341	0.631142		0.678581	0.616298	0.601704	0.592475					0.613813	0.631435						0.662873	0.807697	0.950862	1.10506		1.09901	1.12017	1.08394	1.1162		1.01328	1.06975	1.04059
1.35012	1.26065	1.38158																		1.00586	0.980078	1.05959		0.937266	0.836177	0.869623	0.918424	0.904024	0.810254	0.85162	0.8784	0.852475		0.924329	0.931985	1.0367	1.01102	1.1133	1.46695
0.745445	0.776955	0.784491	0.766264	0.761894	0.829927	0.816472												0.649614	0.582147	0.592105	0.589238	0.595085	0.640237	0.547333	0.631545		0.550489	0.509786	0.566559	0.517582	0.6121	0.495497	0.586105	0.616971		0.668037	0.742061	0.824897		0.798248	0.879177			1.26456	1.19509		1.33182	1.30808	1.39632
0.446455	0.459822	0.465643		0.489449		0.480248	0.465146	0.44936	0.467597	0.431438	0.453839		0.547128	0.550825	0.466642	0.497726	0.435132	0.438373	0.430798		0.418194		0.405402	0.414667			0.411812	0.4271		0.423516	0.450635	0.463			0.488655	0.490157	0.548452	0.652003		0.777198		0.830973	0.812739	0.77671	0.816899		0.868144	0.913792	0.868684
0.415797	0.463743	0.469642	0.437742	0.598669	0.593201	0.411651	0.563626	0.39898	0.520991	0.413599			0.794193		0.556896	0.793988	0.909346		0.586673	0.335838	0.604567		0.341466	0.305137	0.298497				0.324808	0.35064		0.388937	0.417602					0.526376	0.602269	0.661386	0.685604	0.735531		0.747962	0.771767	0.775846
0.404737	0.477889	0.435389																					0.335553	0.380165	0.299129	0.263979	0.277617	0.27208	0.27605	0.276492		0.294778	0.302514	0.309282	0.287421		0.271895	0.319338	0.360241	0.391113	0.43396	0.475244				0.60536
0.804331	0.825943	0.815635			0.738338		0.698104		0.781146										0.837658	0.828439	0.803286		0.850153	0.869259	0.773355	0.807819			0.778514			0.853783	0.744718		0.740136		0.737731	0.871365	0.853583	1.00375	0.91871	0.969071	1.02108	1.04741	1.0219	1.02318	0.972287	0.96735	0.966195
0.464101	0.46423	0.505475	0.550696	0.535551		0.639168	0.553948	0.578278	0.475586	0.619927	0.679042	0.671555	0.63105		0.507745	0.599854	0.483715	0.686592		0.421348	0.429645	0.671643			0.759192	0.43897			0.440112				0.534669		0.680156			0.864749			0.926142			1.09892
	0.296864	0.475823	0.510039	0.502953		0.548849	0.536577	0.514873		0.412323							0.357455	0.337811		0.385829	0.381078		0.383098		0.392584		0.412348				0.449927	0.484663	0.500693			0.543679	0.557117	0.669306				0.786866	0.832635	0.896714	0.93031		1.04229	1.05217	1.05873
	0.59524	0.602969	0.637834	0.587732							0.593848						0.618683	0.561153	0.549872	0.552161		0.52411	0.50242	0.522552	0.528582	0.53407	0.562209	0.563387	0.542195				0.599183	0.627185		0.73065			1.2876			1.37561	1.38779		1.41146	1.48589
	0.285366	0.308497	0.308932	0.311828	0.297794	0.34108		0.318495	0.326974	0.388259	0.351924	0.313003	0.350028				0.23789		0.241776	0.200231		0.182773	0.186156	0.183118	0.170245		0.179968		0.198359					0.207029	0.189852		0.211107	0.232161	0.277051	0.3033			0.362194	0.375712		0.405921
	0.623809	0.663672	0.750105	0.658145																	0.570675	0.578788	0.608044	0.551586	0.57464	0.639062		0.638606		0.700456				0.700019	0.801429		0.821636	0.997015	1.16971			1.33126			1.64653	1.55891			1.65878
	0.528028	0.620434	0.593944		0.702658												0.708231		0.638076	0.659237		0.885989	0.709522	0.730984		0.761771	0.960477		0.672923		0.825565	0.975979	0.869524									1.80952	2.09623	1.95102		2.06915
		0.606692	0.569957	0.578731			0.625965	0.602676	0.576742	0.59185		0.525774		0.535117		0.513997	0.453856	0.415632	0.436289	0.398549	0.410879	0.442825	0.459615	0.456225	0.47043	0.46844	0.465638	0.441694	0.432687	0.407215	0.397061	0.370166	0.343484	0.401758	0.453747	0.418397	0.442077	0.554275	0.651706				0.758214	0.77955	0.833499	0.790675	0.801435	0.827933	0.890623
		0.381583	0.429276	0.515761	0.571612	0.59323	0.607103		0.636631									0.672635	0.540003	0.569136	0.550321		0.590294	0.544499		0.571705	0.572827	0.596557	0.590172	0.583757		0.544498	0.510161		0.457738	0.443935	0.477555	0.594678	0.751523	0.791871		0.775018		0.739251					0.839176
		0.304991	0.316023	0.310047		0.334514		0.379616												0.356447	0.377173	0.314669			0.316985	0.395117		0.373927	0.397731	0.377089	0.530797	0.485225	0.508456	0.411231	0.361672	0.381094	0.367456	0.467507	0.542206	0.586887	0.586845	0.651588	0.653378	0.676674		0.673743		0.690883	0.74762
		0.453605	0.399435	0.422974	0.391997	0.401453	0.48017	0.425142	0.42122			0.376119															0.523518			0.502905	0.470064	0.481601	0.523349		0.418724	0.434549	0.481153	0.537112	0.600825	0.644997	0.596105	0.668899	0.731716	0.70939		0.689952	0.682413	0.689421	0.689233
				0.57277	0.584642				0.583614											0.835288		0.841328	0.761703	0.630031		0.749354	0.647484	0.832007		0.690064		0.643739	0.660707	0.74229			0.706744		0.751706	0.727584	0.644234	0.65438	0.680559	0.738278	0.676669	0.934979	0.737038		0.767151
		0.718361	0.697989	0.707368	0.714673	0.596594	0.63207	0.642349	0.538998			0.552599												0.600803	0.726646	1.06774	0.778944					0.85004	0.738447	0.763011	0.79747			0.908378	1.02268	1.07588	1.11724			1.1501	1.24029	1.25884		1.36938
		0.387616	0.440205	0.435262	0.392985	0.393953			0.417395						0.495917						0.581072	0.558532	0.510033		0.503229	0.584906	0.575573		0.656524		0.667152	0.663258	0.658937	0.593376	0.604482	0.630639	0.706062	0.85533	0.946772	0.998708	1.05782	1.12044	1.23205	1.1853	1.2968	1.33031	1.42026	1.49268	1.51662
		0.495458	0.502167	0.520644	0.570925	0.58717			0.582277						0.568287	0.508986			0.484378	0.509317	0.481143		0.450009	0.409404	0.427418	0.412877	0.43668	0.529237	0.449007	0.524995	0.474655	0.46092	0.495281	0.486659	0.530448	0.520947	0.579639	0.726001	0.878918	0.900708		0.990705	1.02552	1.11214		1.12871	1.17784
		0.25186	0.235783	0.209967												0.279347		0.208856	0.284241		0.212167	0.220788	0.207336	0.238129	0.209797		0.231161	0.232297	0.245271										0.410875	0.430865	0.407747			0.379308		0.346812		0.33317
		0.42294	0.40259	0.65575	0.992592	0.628484	0.888082	0.599176	0.584546		0.499784	0.626356	0.451206	0.597704		0.474912		0.421869	0.462305	0.464195	0.447676																	0.576333	0.635432	0.668362	0.664588		0.71019			0.686925		0.691072	0.667346
		0.335786	0.184375	0.340333		0.203752	0.331171	0.310922					0.329637	0.229926	0.223436		0.308461									0.366995		0.415875			0.42331		0.463432	0.498648	0.528735	0.558042												0.750313
		0.359464	0.433464	0.418459	0.403626		0.40583	0.3938				0.413444	0.395962		0.411834	0.356748	0.352259	0.366696	0.362274	0.311672		0.324439		0.289717	0.310793			0.299058	0.279794			0.315763	0.333354	0.336659	0.336089	0.333644		0.413808	0.488537			0.544642			0.564245	0.618013	0.640757
			0.260129	0.354472	0.613871	1.99319	0.885744	1.55837	1.17589	1.19425		1.28437	1.66665	1.58038	1.93844			1.29907		1.22863	1.83022		0.926738	0.526919	1.11438		0.863085	0.683127	0.325652	0.410511	0.385791	0.561652	0.269461	0.314844	0.261056	0.78153	0.292996	0.315322	0.334394	0.357751	0.338185	0.376149	0.374474	0.398411	0.370537	0.415015	0.397319	0.409985	0.382046
			0.267405	0.271815	0.313543	0.313906	0.274135	0.322374		0.39178					0.457336		0.36781			0.410296	0.438003		0.383884	0.34469	0.361228	0.423429	0.37281	0.353776	0.347712		0.36312		0.381201	0.382732	0.388072	0.398123	0.448067	0.603297		0.728721		0.712056	0.682598	0.693939		0.714405	0.711071	0.675318
			0.552477	0.562626	0.566561	0.588364	0.553097	0.535721		0.578634	0.673151		0.61892		0.807905	0.702768	0.691622	0.732108			0.733176	0.691005		0.656036	0.587868	0.625629	0.630941	0.639837	0.648108	0.656047		0.696071		0.730732	0.735727	0.748535	0.763858	0.915732		1.20693	1.24842	1.30171	1.32696		1.3625		1.42118	1.43368
			0.654891	0.732896	0.731176					0.777605								0.625535		0.607695		0.629545	0.598505	0.733363	0.659093	0.614173		0.663245	0.665029	0.704938	0.737005	0.7533	0.793746		0.801877		0.798462	0.91973	1.03567	1.09608	1.17288		1.24586	1.25166		1.32453			1.33667
			0.176979	0.181729	0.192895	0.207007	0.28019	0.250967	0.276111	0.263039		0.305443		0.31223	0.346485					0.256812	0.260363	0.273747	0.274264	0.277297		0.3143	0.309357	0.330014	0.357987		0.348001						0.362408	0.45556	0.557706	0.598977	0.629168	0.654889	0.66853	0.690249	0.704825	0.742045	0.748801	0.680843	0.71113
			0.305263	0.342915	0.440944			0.42158									0.397128	0.492863	0.418992	0.463532	0.466889	0.529739			0.533789	0.584728	0.530458		0.481658	0.488758		0.463746	0.455345		0.44478	0.441601				0.690983	0.706962	0.744645	0.689032	0.726405
			0.535249	0.418348	0.414402		0.556245									0.442127			0.303792		0.290054			0.267699	0.275934	0.268463	0.289379	0.255442	0.242288	0.258841	0.24444	0.23067		0.236244			0.243183		0.321759	0.332655		0.360737	0.3533	0.355904	0.366265		0.391535	0.390023	0.393605
			1.34723	1.25675	1.52718			1.12621										1.03483			1.18955	1.20314		1.12352	1.11269	1.01456	1.00861	1.38105	1.23072	1.17615		1.51002	1.52765	1.50834	1.45402		1.45376		2.34645	2.45479	2.09033	2.69836	2.82518		3.07981		3.58122	3.53982
							0.432844	0.498108	0.470315		0.509607	0.482733	0.517955		0.445228	0.517669		0.501216	0.665831			0.523747	0.531987		0.571755	0.530282		0.530891	0.482947	0.47342	0.482979	0.481778		0.493659				0.663313			0.892861	0.931654	0.979703	0.99774		1.02478	1.05682	1.02001	1.09546
				0.336785	0.355148																								0.534908	0.541638	0.567013			0.549092	0.586454	0.584066		0.704314		0.930468	1.05446			1.03842	1.02876	0.993809
				0.79297	0.833085	0.847018	0.738056	0.733731	0.735742								0.881178	0.952292	0.726588					0.933979	0.756253	0.811365	0.915463		0.947496	0.959907	1.03164		0.980309	0.90459	0.843341	0.847136	1.05918		1.05546		1.13504	1.0204	1.17256	1.36919		1.22524	1.30804	1.33654	1.60102
				0.336055		0.315366		0.332065	0.418408	0.653733		0.688937		0.699244	0.773076	0.565752	0.670158				0.628572	0.680547	0.735176	0.605501			0.815464	0.737966	0.586153	0.712755	0.730969		0.75919		0.698845	0.73102	0.663074	0.804174		1.20245
				0.199102	0.225234	0.196586	0.195455	0.239268	0.214116	0.247967		0.228087							0.316081		0.375372	0.324278	0.325216	0.326639	0.326734		0.336739	0.355252	0.376875	0.345834	0.337082	0.379385			0.360875	0.390794	0.387415	0.467857	0.596161	0.659101	0.674543	0.621282	0.663798	0.636638			0.712283		0.713206
				0.353375	0.398101	0.418827	0.417808	0.385827			0.386008		0.379665	0.425178	0.417928		0.443937	0.430131	0.428966	0.411406	0.408964	0.40745	0.398202		0.363016	0.376151	0.373498								0.426468	0.409471	0.474837	0.59791	0.715927	0.747943	0.726599		0.738705		0.73915	0.729546	0.745744	0.735844
				2.17585	2.03493	0.994233	1.09951		1.66918	1.73992	1.8623									2.27518	2.53645			2.55513	2.33224		2.35128	2.17482		2.42211	1.8588	2.4608	2.46169	1.73846		1.53222	1.0792			2.12898	2.03464	2.55778	1.97147			2.12079	1.72278		2.51333
					0.687913	0.666433	0.619228	0.717511	0.605581		0.606036		0.466595	0.474	0.48382	0.392259	0.321224	0.307111		0.315545	0.297074							0.290837		0.276895					0.294088	0.30353	0.307512	0.372514	0.427189		0.484953	0.497266
					2.02105	2.26414	1.90976	1.88478	1.68689	1.59667	1.73488	1.82659	1.89715	1.63411	1.83552	2.05938	2.1066	1.47406		2.25408		2.00279			1.33702	2.26894	1.48143	0.927364	1.03186	0.934958	0.904606	0.857789	0.866146	0.747906	0.83549	0.90483	0.64086	0.810563	0.827279	0.706824	0.733862	0.742463		0.727444	0.768309		0.841917	0.884219	0.992409
					0.443882	0.453557	0.418461								0.399137		0.400618	0.413243					0.412456	0.462112		0.436096	0.481422	0.464715		0.567059			0.573498	0.569946			0.736676		0.739142	0.793369	0.958214	0.769304	0.841272			0.816385
					0.502483	0.597957	0.506662	0.584527		0.664887		0.57843					0.598929	0.485484	0.460754		0.450124	0.415234	0.418992							0.697752	0.579353	0.593809	0.562087	0.551778	0.531728						0.851998	0.964184	1.03958		0.917651	0.936481	0.937015	1.03797
					0.279428	0.3109	0.267693					0.363615			0.355881	0.36333	0.331187		0.324198	0.303836	0.324498		0.339451	0.357376	0.321245		0.345158			0.262333	0.27242	0.257251	0.272058	0.275604	0.292985	0.261958	0.276226	0.33551				0.395883		0.425524	0.418099	0.411581	0.412619		0.438546
						0.180222	0.194771	0.196152		0.223928		0.214518	0.277906	0.257822	0.251148	0.260544		0.232293	0.250284								0.3315	0.332087			0.322642		0.321989	0.313498				0.386678		0.449387	0.49653	0.48316	0.494427	0.491498	0.489197	0.503764			0.530081
						0.458421	0.454233	0.464005		0.481735		0.496586				0.445544		0.419518				0.400466	0.404264	0.39667	0.400178	0.386087		0.423467	0.413852	0.415439	0.428534	0.419128	0.412553		0.390543	0.390542	0.394784	0.398048	0.411197	0.400552		0.397408	0.384875	0.381679		0.426694	0.44493	0.453304	0.46747
						0.213256	0.198142	0.284413	0.240154	0.312857					0.22344	0.213709	0.234784	0.183163	0.261595		0.241651	0.216795				0.289877		0.266709			0.252981		0.252192		0.24962	0.257224	0.247803	0.350846	0.460498	0.543962	0.541726		0.560673	0.542059	0.535278	0.470795
						0.505285	0.496069	0.47531	0.50327			0.42508	0.399862	0.386232				0.359412		0.368611	0.37356	0.402716	0.412851	0.391741	0.378164	0.390179	0.43836	0.436661	0.490484	0.472864	0.478231	0.518506	0.499537		0.454108					0.690406				0.714255	0.680371	0.771118	0.758387	0.722434	0.671622
							4.23961	4.83508	4.40869	4.73177	5.09427		5.84698			4.25688			3.59774			3.37868	4.42583	4.03546		2.67749						0.257094			0.236756	0.241051	0.260977	0.327157	0.37532		0.466116	0.485457	0.480643	0.512928		0.477313			0.487446
							0.216777	0.227955	0.384579	0.266434	0.271306	0.282156		0.625239			0.444184		0.324922	0.304477			0.25257	0.25995		0.278236	0.288932		0.263842		0.272803		0.261358	0.250362	0.261454	0.261931	0.295219		0.365291		0.40292	0.44739	0.448097	0.458774	0.465712	0.467457		0.464453
							0.604157	0.686254	0.747136	0.983426	1.26594	1.97076		0.97067	0.808956	0.713821	0.731997	0.696463	0.417135	0.443038	0.402828	0.437967	0.44144	0.795149	0.805752	0.808597	1.13689	0.822845	1.58917	0.663731	0.328649	0.622104	0.27663	0.290064	0.275506	0.228839	0.229728	0.228009	0.205582	0.246995	0.256994	0.233313	0.229874	0.198657	0.219103	0.231709	0.230348	0.199612	0.2118
							0.372967	0.354981	0.399285														0.508544		0.4597	0.466839	0.50542	0.478697	0.562956		0.53892	0.57906		0.544584	0.567054		0.594341	0.632585			0.705622				0.801253	0.782212	0.762012
								0.450296	0.490674	0.471233	0.437981	0.491437	0.522578	0.613689	0.464404	0.486989	0.43156	0.395248	0.432692	0.434262	0.491324	0.482876	0.487329	0.513227		0.534614		0.550958	0.568061	0.596651		0.561076		0.585641	0.578628	0.580554		0.748921	0.994133	0.984103	1.101	1.10576	1.09469	1.10176	1.05885	0.993812	0.986082	0.943288
								0.383364	0.391732	0.427223			0.395176	0.403846					0.348359	0.322462	0.298739		0.309555	0.301008	0.31334	0.320617				0.253751			0.187536	0.187888	0.194507	0.177814		0.315622	0.383462				0.426001			0.540552	0.531371		0.531132
									0.598911	0.627702	0.658692			0.68608		0.703848	0.690308	0.695792	0.699526	0.650291		0.672091	0.647872	0.576717	0.584742	0.577581	0.557085	0.561493	0.576854	0.579792	0.537344					0.487511	0.5623	0.614077	0.680554	0.679704	0.67883	0.689529	0.66594	0.680215	0.644579	0.636079	0.637364	0.620109	0.626786
									0.874671	0.82946	0.874643		0.822596				0.743757		0.705895	0.826472		0.672301	0.69686	0.715872	0.699199		0.725004	0.699106	0.724444		0.727841	0.78818	0.70635	0.747797	0.780634	0.761992	0.773869	0.98154	1.02723	1.23702	1.10709		1.11466	1.22796	1.15903	1.32108	1.22488	1.16921	1.13695
									0.535782	0.54178	0.540826				0.426121		0.394722						0.334091	0.331255		0.333247		0.319251	0.33634	0.324087		0.299895				0.325592		0.411294	0.465752	0.491569		0.562267	0.583025			0.607354	0.619165	0.623001
										1.06062	1.11411	1.06513	1.13011	1.12937		1.20875	1.13514	0.963362	1.08259	1.05147	0.89743	0.943615	0.651567	0.85745	0.996917	0.88161	1.10038	0.876682	1.08552									0.60902	0.715485	0.692591		0.833018	0.811154	0.79928	0.824102	0.932147
										0.906975	0.933918	1.04163			1.31988	1.2261	1.09946					0.211438	0.247693	0.207974	0.181122			0.200704								0.167663	0.18725	0.193787									0.22668
												0.335936	0.354031	0.348779	0.385505	0.373944		0.312334		0.256089	0.274744	0.274414		0.291263	0.28744	0.288018			0.346382	0.345813	0.374536		0.388346	0.386928	0.384332	0.407028	0.416928	0.499566	0.550342	0.57399	0.572109	0.612303		0.612255			0.609362	0.597078	0.608458
												0.278255	0.28127	0.299985	0.276634							0.294969	0.316823				0.314022	0.311798	0.313383		0.31002			0.327193				0.387289								0.606143	0.653151	0.669928	0.690261
												0.380461	0.409168	0.379642		0.354005	0.339354	0.362737		0.402034	0.402971	0.421539	0.418425	0.410256	0.452754	0.505828	0.488067		0.513008	0.554872	0.537588	0.483228	0.502734		0.583302	0.530277	0.668201	0.649075	0.646667	0.780882	0.768503	0.82183	0.886704	0.940998		1.14465	1.07912	1.1645	0.919132
															0.693447	0.536094	0.552706		0.578046	0.601666	0.674994				0.805576		0.77605			0.925139			0.942131	0.796492	0.80086	0.902213	0.946831	1.17569	1.33902	1.58973	1.5315	1.69154	1.50936	1.44438	1.5144	1.43442	1.34754	1.49985	1.29354
																	0.647959	0.604473	0.603923	0.558873	0.548762	0.557716	0.537991	0.555307	0.557118	0.54566		0.521345	0.57975	0.526735	0.546087	0.579868		0.585456				0.76608	0.862637		0.926215		0.975858	1.01001	1.04429	1.13877	1.23025	1.29076	1.32197
																		0.774861	0.810266	0.822228	0.775321	0.817532	0.752686	0.752239	0.734362	0.779422			0.770242	0.78606	0.780544	0.763684	0.751848		0.773809	0.776464			1.41494		1.62955	1.69653		1.87404	1.8795	1.8884	1.99179	2.06394	2.07177
																		0.423754	0.385969	0.371199	0.334019	0.333631		0.350121	0.375041	0.386199	0.363434		0.349996	0.359565	0.361025	0.343909			0.357415	0.352028		0.454258			0.654391	0.676888	0.713423			0.767402		0.772335	0.806388
																		0.822941	0.857289	0.802959	0.78818	0.889901	0.812388		0.761249	0.729424	0.673255	0.78844	0.670772	0.641589		0.544665	0.534714		0.540972		0.508676				0.825768		0.696298	0.691632			0.641987		0.689903
																					0.578626	0.548545	0.629043	0.617867	0.616921	0.6485	0.716815			0.683556			0.699999	0.675667	0.664753	0.656987	0.653602	0.753156		0.954034		1.00276			1.17073	1.2218	1.231	1.23947	1.21726
																					0.262859	0.418684	0.553127	0.421373	0.396394	0.432124	0.381824	0.403666			0.629165				0.395639					0.677196	0.793571	0.677938				0.908113	0.814851	0.69323
																						1.08032	1.01425	1.15506	1.20544		1.29679	1.3372	1.38	1.37981		1.50395		1.50084	1.42944	1.47766	1.4337	1.53263	1.78661	1.74107	1.85404	1.96727	1.99145	2.08688	2.10575	2.34271	2.43942	2.52983	2.23612
																						0.400492	0.446508	0.26899	0.354613	0.27778		0.234092	0.241938		0.249791		0.251686	0.279081	0.317712		0.330369		0.699112	0.794084	0.886062	0.863625		0.874328		0.870071	0.81434	0.846712	0.811245
																						0.300658	0.293476	0.343899	0.357713		0.345866		0.37585	0.382296	0.401813		0.448873			0.439963	0.446756	0.5894	0.737751		0.926445	0.998677		1.03302	1.02207	1.00577		0.966777
																							0.767201				0.554553	0.753338	0.763941	0.865514	0.824921	0.906828	0.964906	1.03732	1.01792	1.04435	1.10749	1.22599	1.29647	1.32891	1.36365	1.49449	1.67004	1.69025	1.68751	1.88913	1.97561	1.88029	1.63674
																							0.704118	0.788948	0.772551	0.764399	0.811631	0.739852	0.738971	0.69253	0.7556	0.724706	0.696564	0.71578	0.673539	0.686433		0.86569	0.899007	0.680068	0.975164		0.929844	0.951385	0.958522
																							0.922662	0.902369	1.01906	0.972982	0.881602	0.897267	0.780903	0.662692	0.620361	0.702625	0.617982	0.609735	0.594086	0.703176	0.696249	0.774717	0.797869	0.777436	0.679503	0.634043		0.452254			0.485201
																							0.30919	0.328479	0.334237	0.352165	0.387427	0.378824	0.37116	0.367549	0.379793		0.431824	0.417679		0.42491		0.587684		0.777144	0.818777	0.762042	0.773953	0.777627	0.7898		0.704396	0.684778
																								0.580808	0.559595	0.570726		0.601576		0.608629							0.653372							0.986815	1.04633	1.01204	0.978753	0.890658	0.883121
																										0.543597	0.63868	0.574172			0.649459	0.605323	0.609929	0.622662	0.652802	0.640349	0.715817				1.0768						1.38932	1.4617	1.45149
																										0.543114	0.527474	0.555209	0.539007		0.544786		0.559304		0.532972			0.707066	0.772416		0.887801	0.939861	0.964451			1.13665	1.16704	1.14612
																										0.629076	0.52876	0.755439	0.618202	0.663894	1.03347	0.839781	0.725884	0.975313		0.567132	0.664925	0.63802	0.66927	0.676042	0.952059	0.661188	0.944915			1.16868	1.19227	1.16325	0.741276
																										0.385575	0.321932	0.320565	0.361074	0.399116		0.337401	0.356214		0.413325		0.353117	0.498347		0.478004	0.485274	0.398095	0.527193	0.463844	0.459987	0.459578	0.456631	0.421979	0.426
																											0.525548	0.558361	0.508596	0.455307	0.566957	0.449202		0.493086	0.449211	0.542418	0.493516	0.544361	0.623466	0.656924	0.648306	0.641106	0.662657	0.666824	0.656266	0.669434	0.673652	0.629508	0.645465
																											0.44817	0.424902	0.528047			0.458015	0.462253	0.525868		0.444699	0.483739	0.538429	0.652724							0.686674		0.67826
																											0.323845	0.30584	0.283118		0.321856	0.301942	0.331326		0.338931	0.326723				0.398913		0.424399	0.432283	0.467981	0.49117	0.562082	0.478468	0.566265
																												1.24649	1.25938	1.12754	1.25087	1.86678				1.75806	2.16222	1.59085	3.10893	3.71872	3.05245	3.50995	3.75984	3.69937	3.25581	3.77374	4.53821	2.44674	2.58378
																												0.585222	0.588231	0.574116	0.477358		0.502925	0.562892	0.506624	0.52268	0.556236	0.556312	0.64935	0.576348	0.643096	0.593113	0.658376	0.627234	0.660075	0.686	0.648315	0.721922	0.699018
																												0.540126	0.43797			0.460761	0.66183	0.41272	0.463439	0.461807	0.654948	0.412603		0.48301		0.47322		0.475676		0.460367	0.462259	0.456793	0.467643
																												0.618844	0.520239	0.505928	0.572401	0.606715	0.61137	0.590626	0.580332	0.575482	0.5843		0.74819				0.70232		0.675442	0.700898	0.770626	0.691366	0.704404
																													0.745998		0.770049	0.82195	0.839027	0.75147	0.805598	0.890726	0.877798	1.01438	1.06793	1.15297	1.16374	1.19658	1.11779	1.45344	1.50088	1.23596	1.30974	1.62279	2.14162
																													0.896245	0.741199	0.784465			0.600682	0.762715	1.2026		1.03904	1.35793	1.16291			0.925009	1.01253	0.967035	0.844003	0.880484		0.891961
																													0.626085	0.656863	0.56751	0.648837	0.598134	0.627782	0.616646	0.56946	0.580077		0.788884	0.872546	0.797601	0.963596	0.866283	0.891234	0.885173		0.859969		0.821564
																														0.522534	0.521982	0.571678	0.536628	0.506009	0.576314	0.58573	0.585767	0.710296	0.818702	0.86396	0.894181	0.923266		0.956709	0.984805	0.979143	1.04718	1.06852	1.10552
																														0.357022	0.362951	0.355668	0.370486	0.37936	0.378198	0.379639		0.502099	0.556516	0.583432			0.661287	0.671625	0.646616	0.72196	0.712746	0.768706	0.777325
																															0.513076	0.584341	0.513166	0.558245	0.491343	0.576547	0.533065		0.582489	0.639408	0.763257	0.617628	0.71786	0.77496	0.766981		0.729725	0.735126
																															0.537057	0.375114	0.46598	0.342672	0.365131	0.358971	0.419424	0.44076	0.615077	0.497632	0.47694	0.579095	0.609531	0.627062	0.658936		0.692464	0.666804	0.641373
																																0.417331	0.407529	0.425025	0.447769	0.423137	0.513261	0.452579	0.55498	0.574656	0.621212			0.733147		0.733924	0.778623
																																0.38059	0.334569	0.385478	0.382577	0.341875			0.498531	0.522193			0.508419	0.441023	0.505273	0.484003	0.4658		0.455087
																																	0.407426	0.413319	0.45203	0.439113		0.5216	0.574206	0.717447			0.554412		0.563356	0.570997	0.578044	0.562107	0.549799
																																	0.476629	0.519295	0.475063	0.481352	0.563256	0.586122	0.677422			0.717791		0.783954	0.752176		0.769132		0.728141
																																	0.511748	0.687875	0.524976	0.515348	0.478418	0.437216	0.488977	0.476536	0.519532			0.499284	0.560997	0.514184	0.55668		0.590799
																																	2.34828	2.60568	2.63178	2.44915	2.72047		3.53925	3.95396		3.78339			3.83204	3.63671	3.62848	3.80021	3.31597
																																		0.562087	0.5133	0.578842	0.680856		0.878493		1.00439	1.12626	1.14316				1.28211
																																		0.4177	0.442095	0.435485									0.778441	0.700489	0.74977
																																			0.584363	0.573472	0.599262	0.743027	0.801422	0.887604	0.993635			0.898806				0.782309	0.796268
																																			0.502287	0.512797	0.513531	0.684311	0.747365	0.92622	0.848657		0.956105		0.961237	0.923479	0.97568		0.942046
																																				0.399547	0.237271	0.286674	0.357426	0.395064	0.429095	0.393759	0.421198	0.429556	0.394101	0.478122	0.487307	0.466706	0.513462
																																				0.494173	0.502178	0.586042	0.796986	0.887843	0.931797			0.936473				1.12826	1.17827
																																				0.909481	1.00872	1.22737		1.25325	1.40456	1.34728	1.34746		1.07369		0.847728	0.761093	0.706806
																																				0.667632	0.75457	0.920123	0.990848			1.04653	1.06219	0.979181	0.940139			0.872534	0.85718
																																					0.585895	0.490912	0.508725		0.694979			0.667446	0.731147	0.897763	0.793942	0.827425	0.840826
																																						1.19458	1.17171	1.12829	1.30949	1.40653	1.87672	1.34943	1.22977	1.4168	1.28566	1.31638	1.27836
																																						0.42273	0.439669	0.569666	0.528931	0.592785		0.452766		0.440132	0.446888	0.414382	0.417717
																																								0.872362	0.923419	0.992784	0.982466	0.956254	0.997365	1.05388	1.10308	1.15784	1.21345
																																										0.652765	0.65487	0.733424	0.634391	0.653127	0.641218
																																													3.45614				3.53401
																																												0.751889	0.757267	0.782228	0.80548		0.892965
																																												0.666975	0.647701	0.64687			0.593148
																																												1.36455	1.38455	1.37637	1.26818	1.35424	1.34733
																																													1.39216	1.54905	1.51166	1.55572	1.63982
																																													1.39383	1.32383	1.42434	1.51074	1.79144
																																													1.06917	1.06244	1.10362	1.10231	1.24254
																																															0.784181	0.708265	0.736351
																																																0.6216	0.569786
																																																0.873763	0.907926
																																																	1.50002
																																																	1.52975

2.50061	2.37768	2.116		1.5121		1.66761	1.66308	1.65368	1.67615	1.62137	1.6506	1.47787	1.49919	1.56284	1.62512	1.35902	1.39771	1.36348	1.34712	1.17477	1.30602	1.34187	1.29016	1.00101	1.01002	0.935117	0.944222	0.945657	0.824137	0.952213	0.975517			0.943655	0.855882	0.961776	0.935512	1.05869	1.2849		1.19076	1.15922	1.15807	1.20166	1.21395	1.16661	1.14824	1.18555	1.1557
0.797455	0.802862	0.769684	0.803974	0.781492	0.724268		0.662502					0.637545	0.601115		0.571615	0.514266	0.58872	0.50127	0.502331	0.528207	0.529373	0.530215	0.546258	0.547445	0.588976	0.568492	0.629455	0.618314	0.66542	0.627413	0.606499	0.588023	0.666648	0.655787	0.633276	0.629388	0.844366	1.28039	1.74311	2.16485	2.4233	2.58585	2.5893	2.41172	2.20778	2.12115	2.01493	1.88899	1.76776
0.234468	0.228711	0.233155	0.241964	0.2467	0.231106		0.29371	0.540845		0.293565	0.447024	0.583181			0.334222	0.328548	0.242118	0.243788	0.237279	0.238398	0.24207	0.233974	0.24891	0.241695	0.229001	0.222215	0.206741	0.219116	0.213519	0.202043	0.200378	0.214146	0.214996	0.205524	0.202514	0.201875	0.213809	0.276516	0.36572	0.404575	0.444196	0.456339	0.458205		0.465025	0.481303	0.469873	0.497122	0.517526
0.672167	0.652842	0.719553	0.58781	0.574982	0.702054	0.625973		0.624039					0.787638			0.84043	0.746966	0.749586	0.782422		0.807917			0.644328	0.659737	0.597952		0.522576	0.529097	0.537889	0.501545	0.499157	0.487736	0.491336	0.523261		0.621866	0.787724	1.01899		1.15788	1.16322	1.15389	1.12722	1.13577	1.11594	1.10948	1.13239	1.14139
0.867159	0.792923	0.682775	0.593836		0.535226	0.618387			0.671054	0.685865	0.694675	0.743613	0.773533	0.757207	0.702157	0.680646	0.668508	0.597728	0.587077	0.559688	0.534709	0.561659	0.563832	0.58897		0.64792	0.656206		0.653115	0.657078	0.714248	0.683415	0.684857	0.697394			0.663031		1.01672	1.03293	1.26515	1.19163	1.20085	1.17208	1.13433		1.20357	1.09763	1.1085
0.250464	0.270074	0.281865	0.308658	0.300897	0.286565	0.673808	0.604432	0.418989										0.617927				0.467995	0.494277	0.38512	0.407169	0.358923	0.381829	0.375598	0.424029	0.356249	0.35407		0.366255	0.400754	0.397623	0.381236	0.378366	0.521565	0.590546	0.683203	0.678398	0.75407	0.746297	0.739712	0.729153		0.657256	0.668177
0.725172	0.719728	0.717263	0.774227	0.754979	0.721442															0.741796	0.694469		0.790812				0.631835		0.697696	0.707318	0.740423	0.711131	0.842483	0.782128	0.75961	0.727703		0.814942	0.815479	0.986066	0.966474		1.04301	1.10357		1.17058	1.22964	1.25787	1.31202
0.395682	0.369294	0.49008		0.498015		0.455428	0.580338	0.427861			0.46566						0.48782	0.38823	0.383382	0.405359	0.440607	0.439121	0.442909	0.455509	0.451455	0.476213	0.481938	0.48075	0.484413	0.483781	0.475312	0.470301		0.451672	0.446064	0.452865	0.471006	0.547291	0.632887	0.690239	0.705854	0.68361	0.657837	0.664741	0.652969	0.645059	0.627445	0.620858	0.58374
1.77992	1.74575	1.62108	1.31833	1.36697	1.71719	1.71735	1.67356	1.46118	1.58526	1.71201	2.5161	2.53193	2.8075		3.36909	3.56825	2.27056	2.98926	3.18099	2.50119			1.89866	1.50717	1.50096		1.55087		1.64449	1.7019	1.75688	1.98445	1.8953	1.95582	1.9578	2.07724	2.31335		2.46142	2.62954	2.51216	2.65394	2.46917	2.62759	2.64403	2.7039	2.7764	2.76697	2.72557
0.551916	0.517205	0.546452			0.688987	0.711591		0.877957	0.860033	0.95316	1.12305					0.79165	0.875646	0.8256		0.841327		0.771552	0.767412	0.806884	0.771511	0.743817	0.850076		0.62434	0.617928	1.39135		1.6653	1.43622	1.67962	1.92434	1.56532	1.34986		1.59879	1.58475			1.67935	1.2055	1.5814	1.81084	1.49491
1.55871	1.56141	1.40709		1.41753															1.43694	1.43265		1.36662	1.47537	1.44172	0.959369	0.890708	0.925954	0.942881	0.961072		0.906951		0.991838	1.0568	1.03677	1.02674	1.0236	1.47014	1.82773	1.98245	2.04725	2.11096	2.22603	2.30286	2.23907		2.32443	2.36143	2.43361
0.586695	0.541848	0.581432	0.527384	0.558943	0.581315		0.502502				0.506939		0.490303			0.481341	0.483236		0.421491	0.428239	0.426723	0.433844	0.435284	0.42211	0.419279	0.415976	0.417917	0.422974	0.457832	0.444051	0.453304	0.459713	0.458746	0.465039	0.464212	0.456335	0.485365	0.630848	0.713211	0.785343	0.776496	0.747677	0.80387	0.819718	0.821297	0.862325	0.827968	0.853896	0.836052
1.02813	0.709309	1.04736	1.0058	1.11553	1.02338		0.92892	0.905282	0.812528	0.809075	0.788176	0.796966	0.782955	0.769224	0.718987	0.705683	0.693139			0.615105		0.589629	0.607547	0.570458				0.472606	0.49428	0.517201	0.393267		0.377906		0.353832	0.368462	0.387811	0.488519	0.642969	0.724543	0.837924	0.853783	0.933207	1.03438	1.15361	1.17362	1.25273	1.24483	1.33859
0.288213	0.297384	0.313641	0.308356	0.317801	0.310799	0.311245	0.379176													0.515528	0.449527		0.463943	0.67725			0.450535	0.724655	0.348698	0.36915	0.450454	0.499982		0.424237	0.36783		0.366202	0.38244	0.414102	0.436698	0.450401	0.478149		0.514242	0.528547	0.555338	0.529072	0.507632	0.505289
0.419889	0.398806	0.40842	0.394562	0.39933	0.407534	0.375895	0.368396	0.367251	0.3747			0.31163	0.315127	0.337004	0.300837	0.320165	0.310808		0.285265		0.27648	0.289254	0.275443	0.266387	0.293407	0.289305	0.310758	0.310714	0.333969	0.331849	0.336002	0.323317		0.322736		0.322507	0.334835	0.411504	0.470108	0.520353	0.560737	0.585267	0.620209	0.624385	0.610871	0.618294	0.616548		0.564764
1.06489	1.12472	1.11559		1.07776	0.938242	0.970839	0.916936	0.809914	0.576544	0.600193	0.656235
0.468867	0.467076	0.499598	0.558731	0.542953	0.634421		0.597746					0.655363					0.502473				0.44167	0.458167		0.458151	0.477123	0.502164	0.512188	0.52464	0.542336	0.550069					1.04767	1.44503
0.497315	0.498968	0.502703	0.476779	0.65499	0.583253	0.548248	0.544642	0.488587			0.497836		0.606914				0.518188	0.460736	0.478901		0.451875	0.406372			0.434301						0.497389	0.496472		0.485779	0.512785	0.493282	0.521671		0.623722		0.694518		0.705932		0.774155			0.753502	0.791436
0.229186	0.244677	0.290489	0.295386		0.317545	0.303206									0.393593		0.213517	0.264924		0.244481	0.228798	0.266673	0.244476	0.225051	0.224917	0.236286	0.228363	0.232829	0.221438	0.211528	0.216441		0.210971	0.20537	0.198336	0.203275			0.296428	0.327182	0.321168	0.340642	0.340509	0.351051	0.354552	0.32975	0.30797	0.311989	0.304627
0.639488	0.612471	0.697224	0.631513	0.650956	0.601944		0.623731														0.571865	0.523843	0.385417		0.39788	0.472408				0.408929	0.38705	0.384422		0.441169	0.381891	0.388053	0.38884	0.444983	0.568586			0.670858	0.708248	0.633133	0.692527	0.666861	0.671969		0.684157
0.509741	0.493255	0.572547	0.518029		0.468077		0.509647	0.523997	0.512986	0.623452	0.623572	0.721381						0.637137			0.546477		0.558453	0.516086	0.530073	0.525304	0.519501	0.514346	0.504018	0.519093	0.529599	0.515583			0.530392		0.56124	0.682657	0.751057	0.822502			0.9544	0.940979			0.968592	1.01031	1.02242
0.533887	0.573505	0.596868	0.577427				0.568195	0.643151			0.63027	0.622919	0.650093			0.678849	0.675991	0.722713	0.633883	0.605128					0.569222			0.555515	0.60187		0.553839		0.511828					0.607329	0.690635	0.692765	0.71264		0.752349	0.789249		0.8334		0.874259	0.887131
0.431536	0.447884	0.432826	0.449328	0.470855	0.467196	0.475291	0.480167	0.471881		0.648429	0.478841	0.676483	0.47614	0.484936	0.50795	0.537629		0.47026	0.457551	0.445432	0.421916	0.426975	0.429797	0.447759		0.448616	0.45578	0.433756			0.476631	0.47455	0.501407		0.532939					0.852684	0.867015	0.877214	0.937404	0.947234				1.11223	1.15023
4.00999	4.62689	4.20143	5.00141	3.37602																				0.508825	0.458489	0.473381	0.463715	0.511463	0.51751	0.504275	0.478134	0.506067		0.505252		0.465973	0.498124	0.638447	0.872985		1.1166				1.15218	1.14115		1.09618
0.400074	0.44685	0.545058	0.62789																			0.424299			0.658527	0.440996	0.478404	0.459115	0.398904	0.423182	0.348591	0.376739	0.346753		0.36098	0.381391	0.382881	0.479969	0.571003	0.540808	0.564105	0.613286			0.616466	0.575879	0.60913		0.554542
0.491859	0.519152	0.504556	0.499784	0.481095	0.470188	0.473524	0.449141	0.433881		0.406862	0.432575					0.435097	0.376535	0.353776	0.389422	0.351127		0.40178	0.454281	0.374329	0.366153	0.359055	0.364467	0.432826	0.367903		0.389418	0.40238	0.408789		0.414254	0.402228	0.417771	0.484601	0.523898	0.537066	0.53636	0.573391	0.52747	0.55186	0.604689	0.564584	0.5643	0.569798	0.593288
0.471669	0.480649	0.429846	0.439814	0.415585	0.433688	0.447225	0.452245	0.409624	0.427711	0.401421	0.431509	0.380939	0.365876	0.402014	0.362989	0.386077	0.405423	0.351685	0.444854	0.598602	0.442724	0.512257	0.650444		0.450811	0.289158				0.507634			0.50487				0.33635	0.353749	0.405921	0.39043	0.444665	0.429355	0.455699	0.467293	0.468019	0.469818	0.498534	0.461208
0.351919	0.35183	0.340146	0.357286	0.371227	0.44065	0.529061	0.747757	1.33723	1.9425		0.854562	0.891944	0.91979		0.873282					0.941804	0.852238		0.667157	0.653478	0.604267						0.778232		0.761184		0.757268								1.15085			1.20581		1.24373	1.12844
0.590487	0.484883	0.574333	0.782796	0.514632	0.703013			0.869117												1.00281		0.927391	0.71772					0.804557			0.887953		0.833884	0.916636	0.670584	0.726315			1.23314	1.30817	1.21412	1.51648	1.43897	1.41844			1.72267
0.260778	0.279399	0.26056		0.263712	0.274403	0.3448	0.313333															0.367264				0.472215	0.512321		0.397289		0.441761	0.401784	0.428108	0.425672	0.49963	0.460784	0.464868	0.550859	0.611389	0.662913	0.685986	0.734233	0.73476	0.772384	0.773282	0.749691	0.772407	0.750004	0.764376
0.823104	0.783895	0.747625	0.765518	0.792198	0.770924	0.825453	0.664005	0.662849	0.78127	0.694427		0.777273						0.50997	0.496245	0.552452	0.49349		0.427007	0.436954	0.430081		0.449994			0.381172	0.334294	0.378256	0.324967	0.313273	0.331463	0.363186		0.418758	0.404548	0.451753	0.491376	0.49676	0.506934	0.460658	0.420749
0.590585	0.616819	0.57358	0.581044	0.580514	0.563455	0.536199	0.552308	0.524522	0.500681																			0.610798						0.635831	0.650591		0.753636					0.857815	0.870902	0.939141	0.922108			0.91428	0.933002
0.39989	0.395098	0.453898	0.582159	0.665184	0.613295	0.609376												0.398734		0.353413	0.354897	0.394398	0.395364	0.415199	0.45296	0.512946	0.651911		1.6703		0.857867									0.82395	0.779926	0.819368	0.785159
0.5356	0.548	0.580371	0.584553	0.6295	1.25224	0.489921	0.691411	0.560288	1.28617	0.90497					0.99918	0.60801	0.793241	0.808588	0.59014	0.709262		0.713846	0.552496	0.538237	0.769169	0.517678	0.737482	0.722404	0.704426	0.682744	0.518972	0.542186	0.474511	0.498983	0.466699	0.481768	0.520872	0.546317	0.667614	0.748093	0.771596	0.77427	0.817925	0.720231	0.77909	0.693504	0.707482	0.715319	0.799236
0.449734	1.21724	1.79341	1.59322	1.83458			1.35931	1.9597													1.48809			1.15718	1.42817	1.54232	1.22459							0.673363			0.810218	0.872741	0.943484	1.00439			1.20039	1.08125	1.1878	1.21513	1.38437	1.42316
0.32717	0.402692	0.359676	0.389773																									1.3408	1.32914	1.47116		1.41972		1.45264	1.2996	1.23702	1.25428	1.41743		1.79917	1.69816	1.76547	1.744	1.72083	1.64409	1.64526	1.65201	1.74009	1.60573
0.88718	1.15421	0.879788																		0.761566	0.74282	0.690233	0.697827	0.721476	0.724898	0.705923	0.70333	0.666498					0.607708			0.603386	0.611441	0.723692		0.828905	0.89003				0.995175	0.999303		0.993947	1.02221
1.36204	1.30416	1.22778	1.17964		1.09268	1.03574			1.08636	1.16368			1.12565	1.20699		1.17708	1.08125	0.963667	0.892141	0.938815	0.911081				0.843045		0.914376		0.844829	0.831462	0.792477			0.809633		0.880334				0.803445			0.730662	0.729848		0.667736	0.730741	0.701612	0.649347
0.608356	0.513322	0.629862	0.672298	0.719609														0.627805	0.620014	0.671506	0.694501	0.642906	0.625361	0.659978	0.640445	0.749947	0.768502	0.858542		1.36721	2.15534	0.790605	0.79242	0.761818	0.707374	0.850265	0.490842				0.52601	0.562441	0.605911	0.611703			0.683994
0.541884	0.539785	0.54891				0.563536	0.554675	0.579707	0.701085	0.54313	0.621344	0.608459	0.645597	0.626362			0.648804	0.570344	0.581266	0.572309	0.558188	0.57775	0.586495	0.597794	0.633366		0.669443			0.699989	0.6769		0.631218	0.670278	0.674864	0.703708	0.766317	0.884232	1.00867		1.16399	1.19765	1.367	1.42116	1.40746		1.5252	1.55053	1.73744
	0.513141	0.550039	0.561817	0.562674	0.556457	0.55956	0.614516									0.586355	0.46855			0.392206	0.479707	0.52459	0.383808	0.423566	0.409697		0.446437	0.705363	0.474451	0.655077		0.620424	0.582051	0.656098	0.519287	0.579548	0.527841	0.589828	0.729108	0.746726	0.844466	0.783156	0.779674	0.767829	0.770351	0.698149	0.756246	0.763087	0.772639
	0.437801	0.524863	0.488951	0.698209	0.612321							0.77913			0.763528		0.613091	0.614399	0.54868	0.538535	0.523764	0.486222	0.5076	0.507703	0.512637				0.4983	0.513785	0.500661	0.482777				0.486793	0.51359	0.699426	0.927726					1.17063	1.11458	1.09081	1.065	1.05106	1.07363
	0.475191	0.453244	0.445534	0.449114			0.42929	0.451105	0.457803	0.467308	0.445603	0.436963	0.418586	0.390701	0.368841	0.372452	0.35328	0.322159	0.314735	0.315216	0.30209	0.307543	0.322681		0.313539	0.330217		0.326397	0.366082	0.363352															0.710996				0.494189
	0.752985	0.738246	0.74233				0.732989													0.652282		0.661306	0.654319	0.674784		0.67614		0.740307	0.659538	0.678265	0.665264		0.642121	0.618093		0.652762	0.682364	0.786829	0.887585	0.989204		1.1026	1.09188				1.11176	1.11992
	0.441021	0.384201	0.444553		0.495311		0.64525															0.607636	0.640112	0.610976	0.64143	0.690988	0.650898		0.623524				0.619231	0.601267	0.682049		0.88191	0.831558		0.958323	0.992035	0.976906	0.825667	0.929573	0.875183	0.787392		0.519568	0.74626
	0.968762	0.955504	1.129	1.14765				0.567329		0.536724	0.576645	0.530328	0.565585	0.589086			0.508294	0.522649		0.524933	0.543055	0.547595			0.541237	0.540856		0.575181	0.535365	0.554568	0.5351	0.543926	0.538779	0.494694			0.504419	0.682865	0.793435	0.835395		0.955549	0.896567	0.960187
	0.326291	0.316172	0.350774		0.353528	0.351363	0.323393	0.367621	0.391268	0.408498	0.550445	0.454497	0.455857		0.545336	0.483018	0.551183	0.355895	0.388996	0.364783	0.402578	0.387901	0.353642		0.32711	0.353732	0.375021		0.409155	0.390203	0.392181	0.392522	0.415472	0.39804		0.44466		0.568517	0.667271	0.745107	0.79607	0.86326	0.825735	0.823408	0.858497	0.886214	0.923241	0.993258	1.01516
	0.517052	0.427193	0.428558						0.596179		0.594254		0.665638	0.701772	0.742456	0.845323	0.780482	0.801336		0.752978	0.775222			0.803455		0.834917		0.823423	0.806095	0.888462	0.842149		0.914204	0.912092				0.970245		1.14259	1.14182	1.15877	1.1255	1.19728		1.22294	1.13503	1.12766
	0.61043	0.625504	0.578501																																														0.851666
	0.692475	0.617333	0.602734	0.59548	0.562575	0.567345	0.548911	0.56952	0.493271	0.477813	0.545721	0.504482	0.509519		0.547243	0.434885	0.398959	0.377226	0.379238	0.388829	0.414785	0.391543	0.388447	0.404435	0.433479	0.45308		0.443854	0.411412	0.441365	0.442918	0.461995	0.444545	0.490697	0.468802	0.44174	0.512937		0.77938	0.853231		0.832789	0.848552	0.831761	0.857658		0.99818	1.0127
		0.52928	0.49012	0.469421	0.480562					0.438596	0.411264	0.424199		0.386979	0.404827			0.352375		0.354238	0.37786	0.389184	0.383408	0.358595	0.404753				0.469427	0.463485	0.46696		0.457142	0.477847	0.487737		0.575	0.72971	0.880635	0.986839		1.1029	1.14621	1.2231	1.24459	1.3352	1.41213	1.49897	1.5494
		0.836992	0.854278	0.814987	0.732372	0.605489	0.605955		0.682669	0.75744	0.849319	0.727688	0.674967		0.754994	0.771959	0.66734	0.761345	0.713169	0.78279		0.935781	0.840467	0.671124	0.608346	0.588435	0.601063	0.677192	0.660144	0.667156	0.721109	0.688722	0.710572		0.732598	0.714181	0.733873	0.891972	0.97491	1.03971		1.15614	1.17039	1.18341		1.22464	1.28571	1.33493	1.32965
		0.354421	0.363217	0.345326	0.441924																								0.584503	0.567439	0.612431	0.567995	0.571767		0.513974		0.577301	0.656718	0.75278	0.774866	0.825804	0.7689	0.790765	0.76463	0.731564	0.75849	0.784831	0.725808	0.742202
		1.2005	1.21068	1.13482	1.11304	1.02577	0.993042	1.14619		1.05688		1.09171	1.03122		1.01671	1.11626	1.02801	1.03085		1.06323				1.05139	1.07011	1.12517	1.12115	1.18319			1.33745		1.36824	1.39126		1.34524			1.59919	1.58773	1.64349	1.76599		1.83203	1.84243	1.89955
		0.880339	0.834724	0.847993	0.807656	0.71005	0.717922	0.761161	0.726548	0.878616	0.78836			0.742839		0.85574			0.724419	0.754424	0.795421	0.810639		0.757855	0.869757	0.973862	0.889428	0.770472		0.780543	0.755124	0.754849					0.952564	0.730718	0.870198		0.933465				1.12383		1.09991	1.07489	1.15318
		0.425157	0.408455	0.437702	0.401208		0.380329		0.335227		0.355302	0.339106	0.346896	0.377743	0.335134	0.324623	0.322995	0.314555	0.309587			0.28396	0.281596	0.273239				0.277068		0.281215	0.275676	0.257427	0.251065		0.251682	0.240101		0.277798	0.293278	0.322336	0.349978	0.34202		0.368148		0.356361	0.365928	0.34417	0.356209
		0.531455	0.542314	0.534952	0.529465	0.574051	0.525101		0.526754	0.55233	0.542882		0.569709	0.533228									0.557186		0.495778		0.408499	0.468713		0.408122			0.383357	0.370609	0.448438	0.37775	0.402791		0.453947	0.522075	0.545304	0.469788	0.519509	0.516887		0.610347			0.593855
		0.408474	0.333673	0.407027			0.227343	0.393113	0.570137	0.37505		0.424097		0.288975	0.300476	0.239978	0.224968		0.272874		0.202801																									0.537054	0.531831	0.672442	0.518991
		0.584029	0.639257	0.59491		0.710133	0.74474	0.655495	0.644279				0.614555			0.595928		0.407854	0.442798	0.391307	0.370633	0.332269	0.333912		0.333235	0.317936	0.331227			0.331465	0.338611			0.310344	0.325378	0.343878	0.345905			0.604735	0.642199	0.68544	0.726587	0.735335	0.706857				0.774443
		0.445648	0.459528	0.475321	0.508495	0.519433		0.496732															0.547873		0.561895								0.787994		0.812831		0.827405	0.955493	1.1232	1.16657	1.21731	1.3402		1.37051	1.34655			1.15161	1.2105
		0.295422	0.257577	0.30682	0.297214			0.401549							0.442779			0.352982	0.465702		0.31996	0.376369	0.35349	0.338755	0.329796		0.265366	0.22935		0.218702	0.226457	0.235398	0.237509		0.237394	0.255945				0.473507	0.465102	0.433798				0.452963	0.409507	0.392914
			0.690575													0.320862	0.275365	0.252126	0.254976	0.266092	0.243229	0.262349		0.276251			0.288187				0.276016			0.304375				0.451172	0.596722		0.727773			0.847882	0.890325	0.7617	0.684159	0.737693
			0.779931	0.726755	0.706061		0.701465	0.708478	0.780691									0.816191		0.731749	0.827906		0.782359	0.763747	0.779611	0.746345	0.75728	0.734817	0.74521	0.71789	0.713311	0.729058	0.789211	0.724173		0.859653		1.02558	1.42752	1.59544	1.52841	1.63611		1.67878	1.50377
			1.11822	1.08634	0.858914		1.13169													1.01286	1.10081		0.980382	0.985236	0.919059	0.96139	1.16704		1.21211	1.17048	1.14733	1.25097	1.17383	1.26762	1.29491	1.20361		1.43635		1.59636	1.56223	1.6513	1.72061		1.69209				1.64027
			0.375979	0.4986	0.409702	0.416823	0.410559	0.41988			0.551666	0.496664		0.625946	0.471541		0.463005	0.467393	0.466404		0.459306		0.431233		0.429225	0.404529	0.435424	0.429798	0.453306	0.468327	0.470718	0.465056	0.464795	0.464746	0.429013	0.425813	0.434436	0.666646	0.880655	0.852057	0.853914	0.815399	0.914943	1.00556	1.07836		1.09224		1.23684
			0.327454	0.342903	0.336641	0.332803	0.32598	0.310049	0.298445	0.360785	0.317732	0.303612	0.367716	0.312736	0.315514	0.341128			0.31439				0.313693	0.340122					0.345369	0.359559		0.37443					0.399746		0.429605	0.456965	0.485077	0.550618		0.613562	0.702386	0.722435		0.789042	0.793514
			0.518977	0.510535	0.502054	0.495497		0.46213	0.453325														0.410577	0.413736		0.419217	0.429925	0.408949	0.398771			0.400299	0.421809	0.422649	0.431584			0.542427		0.710873	0.764234		0.858307	0.861472	0.80409	0.782278	0.778958		0.745072
			0.621014	0.661662	0.581251	0.646164	0.668087	0.635876	0.690232	0.579991		0.676147		0.572339	0.605145	0.55838	0.527459	0.520355	0.564193		0.562753	0.521866	0.54245		0.559055			0.591637	0.566481		0.577388	0.561327		0.585461		0.693043	0.711901	0.812387			1.30607	1.17801	1.11312	1.27723		1.4029			1.57919
			0.345356	0.33961	0.35601	0.367447																	0.436291	0.47987	0.44687	0.399875	0.434326		0.379489		0.376269	0.358218	0.34677		0.37727	0.359409	0.355601	0.425343	0.499865	0.519961	0.557975	0.582623	0.600751	0.606724	0.634148	0.611639	0.624478	0.606466	0.578344
			0.279806	0.301798	0.298823																	0.379081	0.438419			0.468751	0.407655	0.463552	0.377854	0.355378	0.37488	0.419534			0.390261	0.385125		0.555969	0.638649			0.682804	0.693876	0.703141	0.703386		0.785126	0.786639	0.797037
				0.609931	0.660033	0.652444	0.77612	0.6925								0.814669					0.713841		0.747823												0.949061	0.733818	0.9914	0.957859	1.05935	1.19817	1.20447	1.35746
				0.342089	0.303372	0.35553		0.3326	0.368163	0.286167		0.371247	0.420246		0.278523	0.28113	0.245169		0.320868	0.255441		0.279073	0.337045	0.273926			0.260686	0.24851	0.242594	0.249193
				0.521035	0.665482	0.700398		0.760689	0.766002			0.740973					0.635532	0.624648	0.603325	0.586704	0.543158	0.590096	0.611545	0.539481			0.59215	0.534189	0.554762	0.531589	0.544925	0.505767	0.496551	0.520614	0.522787			0.894392		1.53135
				0.625118	0.658362	0.555913	0.743016								0.476706	0.444853	0.398662	0.374925	0.413156	0.415155	0.414605	0.379428	0.383153	0.391565	0.381428	0.396063		0.402838	0.414454	0.420086	0.409466	0.395458	0.405569	0.394145	0.386364				0.522446			0.520781		0.516623	0.501227	0.507581		0.475292	0.496328
					0.916049	0.910505	0.919043				0.759206							0.507128		0.451962	0.439604	0.453615	0.432613	0.430291		0.4434	0.421934	0.403803		0.343964			0.374567			0.368733	0.394159	0.507407	0.642638		0.751963					0.802864
							1.28183											0.563338	0.741036	0.580025	0.520851	0.472995	0.458302	0.510238			0.479041	0.425699	0.434933	0.381572		0.390305	0.3783	0.38855	0.373563	0.389188	0.414347		0.624445		0.66952	0.659724	0.742533	0.688268	0.670363	0.708442	0.683243	0.681398	0.662123
					2.02268	1.91431	1.53354																											0.808903					1.00973	1.0186	1.02555		1.1761		1.1189	1.12381	1.11948		1.17857
					0.444835	0.453961	0.463061		0.504026	0.451329	0.566679		0.504453		0.550015		0.514566	0.530048		0.539367			0.574908		0.647389	0.632081	0.609176		0.625836	0.656562	0.637146	0.675746	0.716189	0.702871	0.712292	0.739727								1.41482		1.48594		1.5828
						1.28581	1.22104	1.27448	1.19522	1.20333	1.15718			0.947906	0.964606	0.968389	0.916993	0.867858	0.815858	0.761566	0.77981	0.794547		0.744912	0.749844	0.711267			0.719288	0.709702	0.690739	0.685685			0.711363						1.20542			1.51719	1.58654				1.68695
						0.780174	0.801986	0.798738	0.824302		0.73281	0.779325	0.786527		0.793381	0.726484	0.662541		0.620031	0.608565	0.605466	0.601061							0.597736	0.583197	0.598143		0.617829	0.654651		0.703149	0.692214	0.819211	0.94949			1.08626			1.14928	1.1827	1.18945	1.20667	1.1982
							0.510773	0.482812	0.48694		0.503139		0.554593							0.434961	0.451388		0.440474	0.471892		0.540768	0.498605	0.555164	0.54079	0.577637	0.601942	0.524959		0.533304	0.567936			0.614939	0.78999	0.811669		0.90989	0.885793		0.926505	0.876182	0.894624	0.894637
							0.441815	0.430496	0.415854	0.374781	0.368397	0.363182			0.537179	0.523715			0.529069							0.480455	0.491733	0.525615	0.563223		0.441396	0.468773	0.473154	0.488685				0.554586	0.716157	0.731785	0.700381	0.659764	0.649008	0.763458	0.747563	0.790737		0.891125	0.899668
							0.690064	0.724408	0.680527	0.67907	0.724811	0.692203	0.654741	0.630393	0.550431				0.614866		0.570676	0.554926	0.524833				0.417804	0.389	0.390745	0.421442	0.420408	0.399362	0.382911	0.369037	0.348317		0.38735		0.606131	0.668644	0.794571		0.86896		0.967455			1.02735	1.06528
								0.487501	0.48221	0.468717		0.474639	0.477933	0.460146	0.478247			0.414985		0.386668			0.377365	0.372308	0.370823	0.359889							0.38787	0.414464	0.412996	0.444394		0.568246											0.882073
								0.33376	0.268486	0.279067	0.322393		0.349287		0.395542		0.413167	0.393503	0.33812	0.287186	0.267452		0.294102	0.266227						0.282026								0.383539			0.530638	0.560669	0.546614	0.52116		0.540194		0.554506
								0.251852	0.276576	0.264964		0.302823	0.286022		0.302163	0.299974		0.287388	0.294672	0.263017		0.266308	0.290277	0.279221		0.30668	0.311038	0.324312	0.332883		0.352267	0.335134	0.352468		0.355728	0.342715		0.43784		0.613808	0.742649	0.746029	0.859113		0.810823		0.788985	0.806915
								0.365992	0.360179	0.359774	0.383078		0.44464	0.415998	0.356077	0.397859	0.415725	0.331021	0.311198	0.321537		0.283823		0.260721		0.226831	0.240533	0.241176		0.223504	0.236512		0.216784	0.221062	0.222254				0.402602	0.426235		0.397322		0.405471	0.407055		0.463458	0.442363
								0.270032	0.28846	0.271756	0.272255		0.299206	0.254375	0.242308	0.251712	0.228976	0.231316	0.240681	0.224912		0.184027	0.189229		0.190712			0.190768		0.191067		0.167206		0.151124	0.164734							0.430124	0.426479	0.435991	0.455529	0.465261		0.438853	0.455795
									0.216943	0.240189	0.248155	0.245317		0.271311	0.224299	0.270186	0.225021	0.230184		0.226907	0.219647	0.252109			0.219095	0.241118		0.242024	0.229965			0.232572	0.225798			0.229814		0.25512	0.27879	0.313397				0.313535		0.283119	0.300204		0.306347
																												0.535729	0.675587	0.616608	0.746429	0.607236	0.548152	0.590441	0.597765	0.649196		0.811777		1.10401	1.11825		1.14095	1.11227	1.11701		1.11469	1.11388	1.15359
										0.407774	0.356001	0.387456		0.345892	0.339353							0.328012				0.361447		0.361078	0.345175	0.344983	0.356026	0.361016	0.361164												0.999621		1.14664	1.22569	1.20261
													0.558324	0.519269	0.505908	0.540732	0.53319		0.528928	0.559572		0.652505	0.67881	0.768259	0.756748	0.825924	0.872861	1.02221	0.925075		0.936047	0.902023	0.886171	0.930363	1.13966	0.957572	0.983512	1.56176	1.67013		1.9402		1.57253
														0.367883	0.358307	0.347289	0.344705	0.325374	0.313974	0.361276	0.344084	0.344593			0.3186	0.338931	0.352835	0.391351		0.377993	0.369306	0.341919	0.328349		0.354137	0.361205	0.389021	0.47861	0.535715	0.600056	0.606895	0.63293	0.624228	0.647014	0.633678	0.611962	0.611481	0.591504
														1.12709	1.194	1.49398			1.81971			1.44277															0.506358	0.527187	0.693947	0.560585	0.649757	0.69486	0.741243	0.920119	0.840819	0.858697	0.936139	0.98846	0.972022
																0.31001	0.364705	0.24028		0.473263	0.20955	0.225391		0.202972						0.231751				0.258097	0.255113								0.39912	0.417351	0.431569	0.449612	0.432896	0.418372	0.427691
																0.571549	0.568046	0.595798	0.558642	0.567547			0.536667						0.520322	0.519452	0.51639						0.416357		0.464587	0.685762	0.73765	0.543306	0.543492	0.583886	0.572292	0.574329	0.566473	0.560837	0.583239
																0.392564	0.353063	0.28759				0.24485		0.334883	0.293154		0.282346		0.277999		0.29308	0.301278	0.27769	0.287414	0.303719		0.353685	0.451275	0.566688		0.538267	0.545431		0.504384	0.512046	0.511506	0.535141	0.585216	0.620629
																0.413043	0.392373	0.369941			0.304978	0.28788	0.275559		0.239841		0.240521	0.217766							0.200871	0.209694						0.3406	0.358933	0.350697	0.364865			0.379607
																	0.927452	0.659706	0.625698	0.666213	0.689369	0.624836	0.617591	0.649045		0.621514		0.61837		0.551019	0.601833	0.544447	0.610201	0.569109	0.574171	0.584887	0.591032	0.658901	0.747143	0.882686	0.904919	0.984624	0.979122		1.04983	1.18527	1.0579	1.16058	0.964982
																	0.651017	0.630011	0.654215	0.620688	0.605786	0.582562				0.572632	0.571439	0.558026	0.563968	0.576359	0.604786	0.600712	0.60026	0.597613	0.599426		0.614974	0.680894		0.810327	0.845454	0.859079	0.83179	0.816849	0.807835		0.818191	0.847228	0.885997
																	0.461781	0.445532	0.49022		0.481283			0.496309			0.416218			0.424941	0.408157	0.403119		0.381412			0.44848	0.450091	0.519224	0.581613		0.599901	0.615979			0.628697		0.667387	0.705863
																	0.339255	0.286015	0.325844			0.366321		0.312134			0.363504	0.353274	0.349549		0.358741	0.387068		0.397023								0.744879		0.80095		0.880765		0.866824	0.87405
																		0.468381	0.38347	0.342883		0.343798	0.336924	0.357954			0.313449			0.398006	0.376179	0.391744	0.454109	0.423585		0.430836			0.692708	0.762372	0.812591	0.828538	0.818254		0.758412	0.780316	0.777026	0.766282	0.754258
																			0.365577	0.343244	0.370068	0.355835	0.367859	0.341701	0.377351	0.373065	0.361823	0.37789	0.421164	0.346306	0.326777	0.385502	0.363327	0.436282	0.377253	0.387519	0.380016	0.417345	0.455189	0.516759	0.479144			0.446362	0.463625	0.456524	0.432603	0.431563	0.424237
																			0.468011	0.442449	0.499636	0.484683	0.541272	0.531023	0.525879	0.487537	0.486635		0.442027	0.490537		0.516721	0.514502	0.489552	0.520515		0.541916	0.671655	0.756123	0.812996		0.865908	0.88002	0.894383	1.00575	0.997474	1.01604	0.973678	0.982204
																				0.289864	0.296092	0.301596	0.301546	0.346342	0.321688	0.315351	0.341841		0.362473	0.37153					0.416429	0.444942		0.593199	0.695213		0.741373	0.745538	0.735748	0.759172		0.75189	0.789632		0.832464
																				0.443521	0.592956	0.36449		0.311197	0.303144	0.285261		0.29296	0.262245	0.430175	0.353947	0.324688											0.44827	0.409347			0.398727	0.428132
																				0.762976	0.648798	0.416221	0.517258		0.403059		0.375748	0.403078	0.402561	0.386234		0.393188	0.418524	0.405578	0.432049	0.421822	0.454408	0.505488	0.616828		0.671511	0.673247	0.673278			0.729282		0.76171
																					0.559263	0.503765	0.56918	0.439533	0.466461	0.448131	0.460687	0.452273		0.457859	0.453669	0.457109			0.462344	0.44627	0.469581	0.719501		0.868945	0.727461		0.743968	0.736843	0.786231	0.845437	0.82519	0.828097	0.842849
																					0.532374	0.500916	0.557379		0.551076		0.714369	0.639784	0.49975				0.472882	0.524578	0.572179	0.401837	0.54864	0.586916	0.807434	0.933807	0.809974	0.895767	0.787922		0.761866		0.795981	0.782973
																					0.612054	0.645468	0.675156			0.593432	0.604229								0.64257		0.648608	0.756573	0.915398	1.05136	1.04062	1.08377	1.15985		1.22905	1.15478	1.1593		1.18361
																					1.06141	1.33901	0.874686	0.95188	0.828587	0.7998		0.601208	0.584315		0.523985		0.54315	0.474541	0.482501	0.445972	0.429056	0.413931		0.399602	0.405139		0.321232			0.380856	0.328939
																						0.311174	0.506251	0.346565	0.303504	0.335644	0.337081	0.336254						0.348122	0.325384	0.340609	0.335211	0.371841	0.450659							0.759247		0.712819	0.73407
																						0.78388	0.819115	0.833552	0.814557	0.826017	0.716956	0.793524	0.792984		0.753952	0.715149	0.776943		0.84967	0.821888	0.869985	0.995466	1.15302	1.3577	1.38053	1.50007	1.46076	1.72184	1.76849	1.81192	1.85266	1.68913	1.92989
																						0.388314	0.402931	0.39132	0.404855	0.381154	0.381586	0.371802		0.368672		0.362555				0.350834	0.341592	0.442665	0.478967				0.420122	0.442667			0.497941
																							0.402351	0.370309	0.340314		0.318135	0.337415	0.351729	0.35468	0.351093	0.348049	0.334409	0.340271		0.365909	0.377121	0.506542		0.671177	0.729021	0.782445	0.827526	0.839287	0.810323	0.783569	0.851157	0.809365	0.842558
																							0.985018	0.779917	0.916583	0.946963	0.861385	1.00314	0.823777	0.822006		0.823642												1.36716	1.31606		1.41926	1.44953	1.43367
																								0.457885	0.554045	0.540209	0.473312					0.495606	0.48386	0.480571	0.496148	0.468758	0.555362		0.979641	1.06639				0.927408	0.883495	0.854005	0.883034	0.8796	0.932601
																								1.00416	1.05527	1.01867	1.07938	1.07927	1.05101	1.11863	1.11223	1.0743	1.13136	1.11218	1.0796		1.00873	1.2343		1.51934	1.45008		1.43149	1.42616	1.47189	1.48776	1.47952	1.44218	1.39213
																									0.513767	0.4861	0.437195	0.433206	0.412259	0.409175	0.445508	0.446196	0.431497		0.445839	0.407014	0.485721	0.599199	0.738346	0.756477	0.785249	0.858256	0.896137	0.932698	0.936158	0.951197	0.948793	0.953021	0.980602
																									0.319813	0.279031	0.263557				0.266314	0.2589			0.304033	0.28462	0.290944	0.427053				0.362478	0.381247		0.393851			0.425005	0.431367
																									0.609652	0.563663	0.62761		0.645204	0.688604	0.740188				0.715878	0.716305	0.772983		1.03229	1.05897		1.11503	1.07169	1.08185		1.06921	1.04027		1.07745
																										0.441763	0.426384	0.419174	0.418896	0.424663	0.411189	0.405156		0.407426	0.407492		0.441799	0.471292	0.526467	0.585366	0.64029	0.676276	0.702777	0.741892		0.781558	0.799961	0.842902	0.890401
																																											1.88794	1.28713	1.12697	1.00671	1.97735	1.36092	1.39436
																										0.314896	0.383649	0.39888	0.406887	0.367131	0.388205	0.384824		0.378153	0.427556			0.515863
																											0.523401	0.492054	0.530587	0.524105	0.511839	0.499056	0.54496	0.512	0.51853	0.547073	0.549726	0.595037	0.681532	0.747153	0.839348	0.878517	0.800304		0.870402	0.872228		0.862494	0.90059
																											0.429086	0.489364	0.443115	0.698589		0.46665	0.505812		0.524633						0.861539	0.954478	0.967873	0.945673	0.988554	0.98488	1.01148	1.01302	1.0482
																											0.944818	1.07048				0.969461	0.91116	0.973446
																												0.353487	0.364727	0.351788	0.5477	0.369646		0.298896	0.307859	0.326003	0.325822	0.442628	0.496114	0.532623	0.549275	0.553854	0.591341	0.598591	0.616989	0.6506	0.66934	0.681315
																																											3.22787	2.31493	2.10391	3.32458
																												1.09708	1.45334	1.35742	1.34922	1.11521		1.16907	1.04482	1.1829	1.17013	1.60134	1.94437	1.99063		2.09212	2.13894		2.25956			2.14635	2.06783
																												0.488449	0.481359	0.49448	0.506946	0.500312	0.471442	0.538149			0.547512	0.658822	0.699217		0.774912		0.798753		0.759641	0.760337	0.742456		0.730703
																												0.393264	0.296445	0.294405		0.229754	0.46387	0.217667		0.216025			0.464544	0.527736		0.560644		0.475025	0.453032	0.510741	0.50529
																													0.2824	0.460094	0.363826	0.714405	0.405949	0.443689	0.406779	0.393761	0.36635	0.432357	0.501229	0.555342	0.558032	0.563321	0.589194	0.66063	0.618039	0.635303	0.570566	0.62827	0.615162
																													0.284815	0.285907	0.295052		0.301214		0.297175			0.381504			0.4721	0.493597					0.533885		0.559061
																														1.21446	1.13369	1.00122	0.819101	1.02934		0.766284	1.09963	1.14116	1.35658	1.62086	1.41566			1.83124		1.82854		1.77631	1.84999
																														0.39604	0.536305	0.396241	0.486012	0.581711		0.458469	0.467871		0.690439		0.937533	0.890095			0.765115	0.702363	0.755262		0.818946
																														0.452109	0.38838	0.398795	0.488225	0.302987		0.380032	0.414682	0.500507	0.642158	0.651039		0.604456	0.60464	0.586669	0.59799	0.588752			0.65437
																																0.545059	0.626041		0.564198	0.661261	0.577699			1.14591	1.21322
																															0.736576	0.732966	0.692927		0.699114			0.825693	0.925522	0.986147	1.0034	0.975374	1.05331	1.09382	0.993714				1.01837
																															0.417785	0.411989	0.410604	0.392124	0.393666	0.41694	0.426782	0.497503	0.553097	0.574477	0.658118	0.69262	0.719446	0.755163		0.833513	0.817376		0.798586
																															0.845305	0.838131	0.888689	0.893207	0.942749	0.87526	0.980219		1.33628	1.45587		1.72413		1.86548	1.87494			1.89664
																															0.301343	0.281435	0.30213	0.29762	0.301842	0.295694	0.27185			0.599821	0.587574	0.60004	0.776891		0.846897	0.848864	0.88825
																																0.904573	0.939519	0.833575		0.981557	0.914626	1.22363	1.44915	1.54808	1.54245	1.63219	1.64663	1.66168	1.6341	1.59654	1.69885	1.69429	1.70646
																																0.857303	0.798077	0.863638	0.878918	0.85816	1.11397	1.11746	1.51693	1.63224	1.53002	1.72142	1.55138	1.73331	1.50487	1.57183	1.93354	1.6506	1.73927
																																0.544245	0.559658	0.464977	0.46912	0.523778	0.454968	0.583787			0.723652	0.811128		0.812574	0.838223	0.824449			0.842921
																																1.05994	1.00312	1.0598			1.20134		1.57345		1.3957			1.41409	1.63622	1.52291	1.64262	1.65171	1.82201
																																0.735576	0.559218	0.6026	0.552563	0.597427	0.645399	0.746506		0.815036	0.911057	0.94778		0.814021		0.809931	0.84638		0.829514
																																	0.654484	0.592023	0.751167	0.695024	0.712192	0.83274		1.1465	1.11612			1.22775	1.14275	1.14952	1.09944	1.03494	0.951668
																																	0.529845	0.532396	0.496027		0.61873	0.7184	0.84845	0.946743	1.00374	1.01288	1.04888	1.06081	0.99753	1.02791	0.967791	0.982432	0.970271
																																	0.496521	0.432005	0.432968		0.448266					1.03772
																																		1.39292	1.46368	1.58374				2.0268	2.02153	2.03904	2.10218	2.09467	2.03023	1.92298	1.90394	1.80352	1.8437
																																		0.569626	0.534794	0.56961		0.653023	0.757925	0.855415	0.929139	0.945278		0.874477	0.892502	0.980475	0.944197	0.890081	0.935621
																																		0.736606	0.690714	0.820754	0.784088
																																		0.732744	0.811803	0.790165		0.987247		1.02464	1.03322		1.13281	1.07067	1.05016		1.09368	1.00366	1.08587
																																			0.751133	0.827174	0.751888	0.770258	0.718885				0.813107	1.51105		0.989377	1.06389
																																			0.782478	0.72253	0.701082	0.781219	0.855412	0.871485	0.909122	0.915849	0.874391	0.896151	0.935748	0.889437	0.928316	0.842666	0.88187
																																			0.60538	0.552481	0.556174		0.707342	0.678453	0.734401	0.758105	0.772662			0.941906		0.985551	0.971498
																																			1.22467	0.974651	1.2196							0.996818	1.07287	1.18792			1.50669
																																			0.52353	0.609579	0.525268	0.57387	0.767159	0.790997			0.85049	0.840608	0.814758	0.850605	0.8176
																																				0.667355	0.691409	0.756707		1.00963	1.02452	1.11752	1.0983	0.92574	0.95424				1.05562
																																				0.279753	0.286847	0.473902		0.326827	0.34973	0.441068	0.543322		0.417013		0.535478	0.570354	0.449313
																																				0.913482	0.895858	1.07737		1.0463		0.933883	0.903209	0.948111	0.906961	0.893229	0.858035
																																					1.07216	1.18645	1.49976	1.38169	1.64654	1.90522	2.05744	2.29904		2.33364		2.45111	2.53845
																																					0.742237	0.859136	0.963013	1.06802		1.14983	1.147	1.21666	1.23984	1.25697	1.31332	1.30651	1.33134
																																					0.567197	0.621153	0.692248	0.71091	0.758425		0.700705	0.728251	0.674937	0.652744	0.585439	0.618603	0.574088
																																					0.638206	0.847796	1.14471			1.06352	1.18931	1.24879	1.12095			1.04447	1.13373
																																						0.663892	0.634634	0.633708			0.782104	0.680526	0.714055	0.74906	0.710457		0.736034
																																						1.53568	1.66926	1.81156		1.85893					1.31196		1.25581
																																						0.717489	0.907265	0.911766		0.960891			0.953778	0.90121	0.898141	0.912205
																																							0.777583	0.842033	0.84047	0.940154	1.00089		0.835117	0.825984	0.827561	0.790037
																																							1.13068	1.543	1.78731	1.9939		1.88555	1.7659	1.5628	1.48139	1.31159	1.2032
																																							0.938646	0.919271	0.957981	1.03665	1.0658		1.13716	1.11847	1.10219	1.17513	1.19376
																																							0.400917	0.386454	0.433247
																																								1.10671	1.11106	1.17492	1.08233		0.952348	0.913576	0.847964		0.774331
																																								0.828588	0.870263	0.913795		1.00241	1.01504	0.994113	0.989944
																																								0.787038	0.881313	0.868083	0.92124	0.959637	0.9628	1.04817	1.02486	1.06858	1.11943
																																									1.03199	0.935952	0.847345		0.915354	0.891763	0.909048	0.854678	0.94013
																																									0.780144	0.764687	0.688415	0.718256	0.71469	0.714933	0.773052
																																										1.12458	1.33364	1.22632		1.29616	1.26337	1.25769	1.4073
																																										1.09785	1.06246	1.0511	0.957768	1.0382	1.11013	1.08289	1.16625
																																												1.08574	1.10053	1.23922	1.2779		1.33739
																																												1.10372	0.837333	0.95803	0.786765	0.736787	0.91938
																																												1.1723	1.15108	1.15022	1.16805	1.20916	1.13928
																																												0.996749	0.979534	1.0087	1.0095	1.05946	1.10858
																																												1.39638	1.77034	1.44714	1.98853	1.58851
																																												4.84889		3.78596	3.52063	3.86129	3.17741
																																													0.924844	0.950955	0.840904	0.929915	0.939776
																																													1.07566	1.0189	1.04904	1.03995	0.994913
																																														1.06683	1.03616	1.09609	0.920362
																																															1.70908	1.77409	1.73545
																																																0.714235	0.779836
																																																	0.825622
																																																	1.35437


Treated with: 0.1xEAA
Replicate 1, Treated at time point 36
0.699968	0.937907	2.25142	0.806136	1.66032	1.75644	1.2578	1.39244	1.56653	1.65776	1.51694	2.07689		1.76695	1.92246	1.35393	1.26736	1.40079	0.98412	0.929991	1.36172	1.14572	0.710748	0.636188	0.612666	0.845164	0.618689	0.620979	0.549427	0.538713	0.538633	0.536171	0.679175	0.625552	0.509814	0.495618	0.65977	0.54876	0.546884	0.539523	0.64717	0.569557	0.517201	0.537169	0.598166	0.524673	0.542758	0.519966	0.496997	0.537208
1.23482	1.43226	1.66807	1.22348	2.03382	1.53684	1.74453	1.67078	1.63977	1.64092	1.28084	1.73585	1.66655		1.80488	1.87661	1.70497	1.60041	1.38381	0.835777	0.874958	0.520878	0.403044	0.36588	0.288061	0.367745	0.332115	0.294424	0.252869	0.281067	0.273426	0.327981	0.29607	0.281938	0.28024	0.299561	0.30671	0.345943		0.713836	0.841686		0.97503	0.987021	0.982437	0.944276	0.917023	0.91272	0.895585	0.904581
0.457641	0.470248	0.445959	0.452765	0.458761	0.431163	0.462952	0.504334	0.502715	0.473413	0.483025	0.739269	0.48184		0.471457	0.464537	0.454265		0.39525	0.386008	0.39392	0.386698	0.398097	0.392166	0.396976	0.423594		0.439588	0.451043	0.461336	0.45824		0.473414	0.470586	0.462005	0.448509	0.450134	0.47052	0.650446	0.909653	1.15748		1.52902	1.58217	1.52641	1.40952	1.348	1.25824	1.20521	1.20344
0.541009	0.564699	0.427923			0.327711	0.359358	0.369946		0.381722	0.331822	0.321616	0.333532	0.34693	0.367792	0.386398	0.443177	0.411232	0.373721	0.421445	0.438236		0.422633	0.411601	0.405924	0.426565	0.414237	0.414643	0.4349	0.423145	0.472697	0.450856		0.44712	0.437784		0.430913	0.471827	0.570011	0.735847	0.804798	0.848239	0.85431	0.934811	0.910479	1.0167	1.05936	1.14661	1.20187	1.17891
0.238581	0.278998	0.303132	0.434712	0.407939	0.399604	0.50975	0.443054												0.539191	0.423948	0.370804	0.372824	0.408396	0.417294		0.430433		0.391765	0.379415	0.404248	0.396341	0.422475	0.419524	0.443285	0.453921	0.449472	0.489224	0.705996	0.933295		1.22902	1.29687	1.3681	1.35753	1.4328	1.40801	1.35823	1.38203	1.31278
0.288769	0.284979	0.298998	0.311687		0.335805	0.31536	0.36862	0.350063	0.527432	0.409666	0.369382			0.534087	0.548179		0.3648	0.356386	0.339613	0.34789	0.367524	0.373179	0.364718	0.341948	0.344378	0.362339	0.353807	0.351005	0.348961	0.358458		0.346185		0.338315	0.327438	0.330202	0.380055	0.473239	0.566305	0.64491	0.731409	0.763452	0.8112	0.854877		0.874254	0.869919	0.945765	0.902225
0.516031	0.536616	0.586045	0.55097		0.571233	0.610551	0.601773			0.552946	0.519099	0.472112	0.390825		0.358992	0.336263	0.330194	0.335721	0.355372	0.348427	0.348241	0.345	0.373117	0.379394	0.411228	0.419069	0.459752	0.481105	0.462685	0.4485	0.462838	0.477566	0.457291	0.456643	0.436704	0.437511	0.468452	0.555408	0.689703	0.736033	0.736931	0.744441	0.690965	0.642112	0.752035	0.758565	0.728627	0.725662	0.672525
1.05584	1.06775	0.933558	1.41757		1.30879		1.34909	0.945274	0.757361		0.896835	0.955779	0.935285	0.808322		0.649171		0.818698	0.748167	0.547567		0.36798	0.423979									0.897286	0.834231	0.632157		0.271954	0.578382	0.831343	1.29874	1.50479	1.33856	1.15442	1.23602	1.4578	1.38857	1.37591	1.42652	1.32798	1.27148
0.648886	1.27523	0.92892	0.584697	0.396381		0.315127	0.30579	0.311469	0.290752	0.307167		0.307652	0.301702			0.45042	0.600048	0.992179	1.28537	2.19866		3.82301		2.97991	2.74249	2.58726	2.2122	1.78016		0.839538	0.91166	1.20809	1.03458	0.401512	0.535364	1.00806	0.289303	0.409398	0.554645	0.617528	0.600313	0.598414	0.589974	0.530233	0.532984	0.491112	0.521048	0.534742	0.555423
0.385884	0.418509	0.44051	0.44638	0.460366	0.503802	0.471826	0.45694	0.452468		0.46884		0.456813	0.446923	0.446693	0.464106	0.431717	0.456381	0.424877	0.445438	0.424779	0.441198		0.350524	0.361053	0.348809	0.360842	0.367861	0.362454	0.361288	0.365519	0.363977	0.373865	0.384353	0.39277	0.384303		0.397384		0.64839					0.892706				0.951386	0.941668
0.334898	0.307482	0.339826	0.435068														0.40762		0.449155	0.253363	0.264038	0.275289	0.204496	0.267901	0.207485	0.226474	0.198177	0.23702	0.235948	0.252579	0.246835	0.245718	0.268684	0.283515	0.301677	0.281076	0.284368		0.451142	0.489635	0.523362	0.550979		0.631676	0.64091	0.674032	0.653122	0.65449	0.688706
0.185056	0.197602	0.18778	0.214963	0.229166		0.257325			0.32985							0.411068	0.405255	0.357704		0.25716	0.282386	0.257054		0.29082	0.258194		0.283245	0.319636		0.306824	0.3171	0.327771	0.335302	0.345813	0.351557		0.406023	0.569455		1.11918	1.19415	1.34562	1.12472	1.31077			1.35445	1.08
1.28088	1.26826	1.33157																1.1145	1.04745	1.07586	1.01769	1.00905	0.925352	0.883731	0.75173	0.705664		0.648687	0.619318	0.59418	0.57518			0.536649	0.525766	0.521874	0.617024	0.890168	1.3139	1.663	1.72895	1.76306		1.6922			1.58229	1.4543	1.55267
0.266417	0.270223	0.270888		0.291338	0.316196	0.358573		0.386356										0.449152	0.672611	0.524876	0.635364	0.456458	0.472484	0.451314	0.555618	0.531331	0.697977	0.571696		0.587408	0.619624	0.792293	0.775012	0.822158	0.849769	0.723109	0.513574	0.793439	0.950567		0.937192	1.05211	1.10944	1.2516	1.20079	1.17138	1.11925	1.15584	1.15228
2.8775	1.23298	1.19993	1.15298	2.07815	2.16724	2.08309	1.918	2.04939	1.94436	2.08976	2.33571		2.18277	2.25555	2.1927	1.9026	2.05174	1.87048	2.09408	1.73379	1.99147	1.57851	1.38748	1.29543	1.62426	1.53214	1.28518	0.915517	1.24048				0.880402	0.858725	1.21315	1.13865	0.756796	1.50058	1.53641	1.35781	1.60824	1.16215	1.0735	1.36233	1.34913	0.958753	0.990351	1.06271	1.07518
0.359719	0.376733	0.371708	0.360335	0.329495					0.38062											0.523995	0.513252		0.550971	0.542434	0.54748	0.555536	0.585865	0.590436		0.631509	0.65066	0.625859	0.64591	0.634476	0.644274	0.646848	0.703025	0.857309	1.09586	1.41386	1.5544			1.59033	1.64831	1.62002
3.04262	4.13666	4.3188					2.08397	1.92752		1.43134			1.47068					0.969449		0.81893		0.653524	0.592005	0.601866	0.619778	0.815564	0.741219	0.603943	0.655997	0.758653	0.636348	0.60005	0.503866	0.558399	0.725426										0.864819	0.734033	0.734009	0.734147	0.761703
0.459446	0.494706	0.487522	0.491857	0.517288		0.488602		0.546572	0.506159		0.445602		0.546867			0.451641	0.438423	0.405157		0.438285	0.435501	0.406685	0.402798		0.402126			0.40681			0.439807			0.438788		0.459896	0.472455	0.638433	0.79635		0.84858	0.847033	0.846845					0.810555	0.832444
0.562549	0.535169	0.503193	0.472261	0.484659	0.483823	0.441235	0.421949	0.429427	0.452838	0.475646	0.565143	0.443733			0.561007	0.419578	0.425959	0.439926	0.429991	0.469262	0.456606	0.489286	0.517428		0.612908	0.512857	0.493716	0.505477	0.515828	0.497001	0.537422	0.571754	0.596706	0.56969	0.567606	0.602864	0.667473	0.776041	0.919838	1.01403	1.03517	0.96897	1.08243	0.95285	0.969011	1.01146	0.979788	0.976223	0.974249
0.34386	0.364648	0.33838	0.414756	0.479525	0.480274	0.451339	0.434557														0.43587	0.405094	0.397308	0.382939			0.438186	0.390707	0.405551	0.417539	0.423785	0.437326			0.448416	0.440484		0.586422	0.676702	0.772739	0.824192	0.888605	0.964015		1.16555	1.14443	1.2327	1.31266	1.32574
0.269645	0.302026	0.351247	0.708059	0.585488													0.482086			0.393138	0.386605	0.40503	0.411108	0.452046	0.378303		0.381062	0.394888	0.403573					0.434427					0.677828		0.795199			0.790337			0.811106	0.85965	0.818804
1.28958	1.40378	1.58548	1.83252	2.12474	2.16733	2.3197	2.59357	2.803		2.23674			2.37793		2.37362	2.55911	2.63643	2.58158	2.65253	3.16741	3.05414	3.02206					2.57986	3.89958	3.17555	3.96318	3.01237	2.78711	3.46047	3.63639	5.07652	1.18062	1.26884	3.3945	1.32456	2.56414	1.52464	1.88882	1.63872		1.67245	1.86791	1.80157		1.79997
1.63654	1.72468	1.60868	1.61691		1.41921		1.0251				0.96176						0.90405		0.891132	0.840971	0.865432		0.871912	0.843871	0.866386	0.896928	0.947451		0.88632	0.867065	0.845019		0.837226	0.803296		0.746054	0.787804			1.3188	1.49788	1.60388	1.73297	1.84133	1.86878	1.93172	1.92119	1.99085	2.10339
1.29845	1.18222	1.24917	1.39034	1.18664	1.12378	1.13627	1.1095	1.37497	1.40537	1.17316	1.10236	1.24253	1.31991	1.41068	1.38839	1.35351	1.11351				1.11984	0.90744	0.874766	0.907924	0.98837	1.10058	1.01007		1.10079	0.941301	0.916897	1.10379	0.631457	0.586798	0.798696	0.651064	0.597644	0.808266	0.845085	0.935046	0.928552	0.898157	0.908357	0.869443	0.85525	0.875036	0.888648	0.880569	0.904757
0.758067	0.828274	0.845341	0.831782	0.900672	0.820224	0.805696	0.785703	0.800541	0.807102		0.783656			0.733625		0.691831	0.634814	0.578303		0.534362									0.440038		0.498716	0.497499		0.536162	0.543552	0.544754	0.615254	0.873324	1.16555	1.384	1.49299	1.52793	1.59835	1.55337	1.488	1.45457	1.43996	1.37964	1.39732
1.24245	1.00447	1.15011	0.838274	0.982712	0.855219																							1.09691		1.22125	1.11654	1.11632	1.12028	1.01866	0.997322	1.0373	1.11933	0.989334		1.15838	1.30547	1.57885	1.69531	1.78928	1.78999
0.387917	0.37352	0.380441					0.977036	1.00348	0.953687		0.942086	0.866446	0.919539	0.899443	0.809629	0.748475			0.978858	0.947658								0.408293	0.395584	0.434075	0.398118		0.469798	0.467808	0.463599	0.472797	0.504318	0.631678	0.798887	0.910633	1.01725	1.07838		1.20675	1.23508	1.19295	1.11565	1.05689	1.09149
0.355906	0.327525	0.501358	0.353874																					0.368702		0.414193	0.362745	0.390269	0.370785	0.353226	0.366647	0.353877		0.373058	0.389245				1.05285		1.29529	1.32863	1.31211	1.2619		1.20609			1.09944
	0.638063	0.626499	0.725785	0.502544	0.497544	0.585046	0.66225	0.682884	0.743881	0.764225	0.773156	0.74179	0.82835	0.91996	0.989308	0.950332	0.941227	0.818113	0.834523	0.848325	0.778794	0.777225	0.761687	0.716051	0.731246	0.851611	0.833568	0.7327	0.767245	0.619054	0.644493	0.640313	0.639335	0.639266	0.632288	0.579032	0.587845	0.691175	0.858452	1.02823	1.00676	1.03808	1.05686	1.04121	1.02156	0.974515	0.980023	0.882606	0.890552
	0.386675	0.391118	0.462828		0.508728										0.568093			0.462067	0.468654	0.45484	0.439636	0.450355	0.409942	0.402893		0.41237	0.405612	0.409236	0.407408	0.393493	0.401342	0.422026		0.376164	0.38023	0.392817	0.451714	0.582205	0.78993	0.939828	1.03802	1.09899	1.11041	1.09861	1.10265	1.10001	1.07813	1.05998	1.03638
	0.199284	0.238118	0.22506	0.250716	0.204533						0.317582						0.311895			0.161087			0.19218	0.205593	0.16826	0.159589	0.145269	0.160783	0.166764	0.178119		0.163237	0.185617	0.163577		0.157858	0.172695	0.274767	0.387394	0.459817	0.539447					0.491898	0.490812	0.46221	0.474832
	2.14405	4.47454	3.56251	2.50379	2.48802	2.00875		2.1768	2.17736	1.85732		2.04932	1.78621	1.535	1.31487	1.5762	1.42957	1.00218	1.26089		1.0707	0.609562	0.927844	0.613527		0.671395	0.578709	0.542238		0.43422		0.480531	0.444633	0.728029	0.664304	0.532582	0.789874		0.923535			0.839453	0.777227	0.77505		0.825469	0.825075	0.781482	0.714561
	0.372206	0.393359	0.41101	0.441431		0.483692	0.56113	0.969086											0.582446		0.56216	0.514511	0.537722		0.562519	0.578067	0.552859	0.543597	0.576445	0.55215	0.531388	0.54097	0.537581	0.546954	0.523192	0.524921	0.518816	0.633019	0.745938		0.889069	0.940029	1.00216	1.03031	1.03187	1.03217		1.07744	1.04887
	0.445065	0.438151	0.471345	0.514803	0.531009	0.537126	0.527424			0.509155		0.637059	0.447896		0.650985	0.459706	0.336134	0.339094	0.318615	0.386074				0.328136	0.363393	0.394261	0.381588	0.395527		0.399366	0.428229				0.527059	0.556575	0.591452	0.810648	1.16546	1.40235	1.48938	1.5972	1.60651	1.60689	1.73468	1.6842	1.74954	1.82759	1.86615
	1.38375	1.32623	1.6709	1.39786		1.49328	1.34628	1.36097	1.24949		1.38597	1.36158		1.47547	1.51949		1.50946	1.42715	1.43229		1.34598	1.25096	1.30369	1.29825	1.25926	1.13898	1.30354		1.41907	1.14271	0.875103	1.09407	1.10941	1.11746		0.940618	0.863667	0.847832	1.03493	1.10417		1.3196	1.28537		1.29684	1.21741	1.27386	1.3075	1.28638
	1.22842	0.778498	0.977827	0.76313	0.8645	0.970735	1.18154	1.10902	1.02903	1.12735	1.08634	1.05687	1.28978	0.874374	0.848859	0.83144	0.764391		0.657637	0.659036	0.609227	0.679606	0.643376	0.683029	0.667857	0.647362		0.732207	0.741771	0.816122		0.896167	0.931396	0.908423				1.30815	1.45685	1.56149	1.641	1.5427	1.66588		1.97063	2.47069	2.21679	1.85998
	0.532762	0.534882	0.513087	0.578285	0.586489	0.633704		0.642819									0.521236	0.611499	0.45409	0.456395	0.410807	0.433525	0.432814		0.442748				0.579577		0.72835	0.856611	0.79735	0.851529	0.796991	0.846587	0.661903	0.860465		1.04518	1.05483	1.16231	1.0283	1.08952	1.10089	1.14051	1.14022	1.35839	1.22461
	0.406141	0.399669	0.333038	0.375733	0.318209	0.336949			0.494638											0.803514	0.989402		1.6184	1.25836	1.46585	1.62588		1.82821	0.933295	1.77118		1.75231	0.918256	1.06449	0.981939	0.904058	1.10763	1.38361	1.72798		1.96393	1.80053	1.92403		1.15657	2.19052	2.00941	3.1378	2.58604
	0.26954	0.273483	0.330004	0.302885			0.350058											0.262273	0.288544	0.261402		0.415009		0.203121		0.214523		0.213038		0.197208		0.193932	0.198183	0.190596	0.203065								0.388699		0.379566			0.38633
	0.383292	0.427607	0.404726				0.434023	0.448391	0.506878														0.4037	0.391427	0.404896	0.385136	0.397645		0.412696	0.359788	0.386514	0.415612	0.416916	0.376407	0.411201	0.416346	0.461838	0.573227	0.747495	0.847854	0.96231	1.02977	1.04481	1.13136	1.17588		1.11646		1.03362
	0.295957	0.316275	0.349549	0.31687																										0.626878	0.45872		0.472101	0.486522	0.475513	0.508234	0.486258	0.639749	0.880197	0.87979	1.0119	1.21902	1.26123	1.25004	1.17747	1.22138	1.14521	1.08313	1.10556
	0.203141	0.205673	0.222609	0.266748			0.246448	0.323131															0.367544	0.38232	0.342365	0.326777	0.317515		0.370906		0.336507				0.352938	0.362449	0.41847			0.728398	0.788116		0.898684		0.949842	0.89077	0.938806	0.967736	1.00472
	0.300624	0.219064	0.333463	0.330977	0.506735																								0.646958			0.411178	0.382436		0.39582	0.416381	0.425598		0.852309	0.942138	1.0488			1.07424	0.976808	1.00158	0.96101	0.972125	0.976553
		1.28782	3.67596	1.28573	0.356249	0.348944	0.346235	0.340629	0.435379		0.44578	1.0317		0.483681	0.433939	0.429867	0.423759		0.522701	0.553828	0.587835	0.607692	0.505465	0.453037	0.446554	0.445607	0.506931	0.50978	0.610402	0.649384	0.496488	0.600402	0.550619	0.753851	0.642548		0.548545	0.684714	0.808098	0.998733	1.13981	1.1539	1.18182	1.21919	1.18999	1.20703	1.13947	1.08268	1.14801
		0.421448	0.449576	0.534284	0.511676	0.554724							1.63924	1.75918			1.3268	1.08633	0.947175	0.937097	0.860424	0.930052		0.89949	0.83048		0.249729	0.245786	0.246895	0.253861			0.24264	0.236149	0.251663	0.248854	0.261506	0.367969	0.498936	0.603512		0.72704	0.75826	0.796868		0.77387		0.805876
		0.22075	0.215748	0.20254	0.216226		0.221947	0.178039	0.213388	0.276959	0.240668	0.534931		0.48651		0.234683		0.230107	0.192863	0.212959	0.223039	0.211382	0.193611	0.196219	0.194312	0.186423	0.19005		0.208253	0.221349	0.214207	0.218587	0.218117	0.227766	0.24505	0.245178	0.294593			0.751801	0.783857	0.813421	0.74833	0.781701	0.780315	0.739522	0.753895		0.775501
		1.02725	1.1544	0.834041			0.696234	0.670662	0.688832	0.678101	0.783002	0.635267		0.57	0.505725	0.495494	0.680633	0.49111		0.373337	0.40338	0.355813	0.480934	0.254337		0.253075	0.249476	0.197124	0.18755	0.286423	0.324208	0.21867	0.249925	0.205295	0.176818		0.187312	0.277335		0.48123		0.499479	0.491303		0.453563		0.421682	0.390568
			1.73106	1.53998	1.11127	1.19181	0.958335		0.980853		0.861972																	1.43259			1.47851				1.58131	1.71597	1.60235	1.91369	2.1562	2.46818	2.89115	3.57897		4.06624
		0.453669	0.391126	0.529431				0.611201								0.560384	0.496816	0.492254	0.493411	0.514388	0.570985	0.563294	0.541875		0.556199	0.555978		0.553826	0.561326	0.542007	0.546488			0.592548	0.585057	0.552075			0.940029		1.27648	1.32581	1.1761	1.12209			1.24677	1.20096	1.2161
		0.383212	0.363659	0.358597	0.364447	0.363155			0.369449		0.33488	0.336436	0.328677	0.298587	0.273623	0.285779	0.277847		0.258437										0.264122		0.271536	0.274688	0.276476	0.279864	0.284244		0.329427	0.501258		0.875199	0.889727	0.930558		0.752727	0.762737	0.823062		0.846304
		1.61141	1.93713	2.78865	3.54481		4.10665	4.43299		4.57002	5.01157	5.30087			5.87834										0.792678	0.596165	0.586103			0.599709		0.604582		0.651464	0.555867	0.581409		0.898407	1.36771	1.67062	1.66082	1.62958	1.78077	1.66543	1.62613	1.60453	1.57791	1.50288
		0.329788	0.301342	0.342685	0.320627	0.313789	0.282627		0.382241	0.325844						0.34341	0.233833	0.292345	0.266425	0.249405	0.251317		0.249184	0.258675	0.274175	0.277789		0.262607			0.251985	0.266165		0.249586					0.553433			0.800846	0.849173	0.871455			0.941854
																																1.72625	2.24341	2.26756		1.90267	1.97594	1.95741	2.52072	2.74753	2.83097	2.72556	2.66948	2.80271	2.7047	2.9829	2.70092		2.69926
		0.961892					5.21039	0.750477	0.710517	0.680799	0.676079	0.720642		0.720549	0.727981	0.753426	0.877509	0.834559		0.70182	0.665015		0.649724	0.609936	0.592088		0.651307	0.638568			0.695593	0.658574	0.70678	0.664414		0.691168	0.842909	0.911024				1.18405				1.18669	1.38714		1.32133
		0.190335	0.201555	0.243728	0.287608														0.237151		0.282002	0.311463	0.267616	0.298942	0.271902	0.274129	0.27586	0.295161	0.276888	0.271045	0.291452							0.445739	0.607979						0.719315		0.729516		0.717865
		0.304842	0.330041	0.357553														0.363479		0.282077		0.248894	0.230546	0.226933	0.217184	0.2219			0.228928			0.241721		0.254245	0.250859						0.687117		0.725955			0.708206	0.72124	0.709342	0.702334
									3.48648	4.26292	5.39765		5.38414								0.369854		0.395954	0.191537	0.182114	0.196026	0.223307	0.196224	0.20018	0.185278	0.190861		0.180526	0.17836	0.184291		0.212679		0.449347	0.598334	0.668862						0.43254
			0.768452	0.803967	0.828256	0.926451	0.882188		0.995695		0.904434				0.954574			0.847908	0.739408		0.729776	0.656965		0.669014	0.627331	0.651376	0.664159	0.601427	0.641589	0.652654	0.598729		0.613856	0.627985		0.695815	0.657887	0.871248	1.04738	1.23789	1.26997	1.2221	1.242	1.32264	1.27312	1.26325	1.16234	1.13255	1.21056
			0.147145	0.292465	0.184838		0.213028												0.406397	0.265646	0.315631	0.262305	0.269237	0.231962	0.254723	0.250053		0.249328	0.258762	0.250752	0.250566	0.229327	0.233648		0.237337	0.239668	0.235307	0.357656	0.49535	0.56323	0.540339	0.538654	0.495395	0.473974	0.441852	0.422691	0.427031	0.409268	0.410734
			0.325483	0.34297	0.331321		0.286553	0.520565	0.306427	0.282706	0.262508		0.285997	0.395163				0.251386	0.263818	0.271382	0.256665		0.259181	0.266407	0.275929	0.290766	0.291143				0.303628	0.315181		0.359646	0.36099			0.575011	0.776452	0.979589	1.17973		1.21153	1.20805				1.24167	1.23081
			0.515517	0.470239	0.45485	0.500109	0.470866	0.516299	0.464151				0.623482													0.747159															1.04798				1.30655		1.29914	1.33082	1.29482
			0.755904	0.807551	0.978468	1.15097	1.42974	1.48962		0.92126		1.4623	1.34717	1.34411	1.31611	1.3342		1.13744	1.35011		1.32275		1.34507	1.26938	1.25441		1.2177	1.14137	0.821427	1.24587	0.806751	1.13133	1.1982	1.05925		1.35346	1.52204	1.68055						3.22028	3.53248	3.77363
			0.545046	0.645198	0.626858			0.538623		0.470808				0.422528													0.258787	0.279869		0.287626		0.272601			0.29207				0.643876		0.770279				0.739396	0.736168	0.739298	0.752598	0.774409
			0.172116	0.195507	0.18173	0.19069	0.218951	0.173706	0.20108	0.218659		0.180369		0.31148	0.60162	0.433906		0.556074	0.301509	0.280755	0.206814	0.248514	0.235313	0.198019	0.170589	0.181176	0.201116	0.192881	0.176136	0.188369	0.185192	0.19094	0.185111	0.175243		0.178281	0.19205	0.281166	0.415953				0.486204	0.462339		0.486662		0.534564	0.558846
			0.228111	0.255448	0.386517	0.401216		0.333476										0.519557	0.263583	0.362097	0.292505	0.214867		0.200457	0.195101	0.214478	0.218301	0.205939	0.211304	0.221661	0.212736	0.231722	0.228433	0.214631	0.233916		0.27567		0.527352										0.797932
				0.321299	0.341719	0.356154	0.369402	0.386442		0.503849					0.321835	0.357675	0.430154	0.348405	0.311029	0.321614			0.33219	0.357376	0.314024	0.274977	0.275865	0.237051	0.237779	0.232429	0.238913			0.236716		0.243087		0.429102		0.658307	0.721724	0.747932	0.60253		0.558924	0.534285	0.529091	0.548945	0.567521
					0.792901	0.986915	0.995884	0.964923	0.941277	0.915517	0.903078	0.910024	0.922187		0.813493			0.786733	0.780689		0.699511	0.692432	0.634715	0.616663	0.642416		0.600096	0.603352	0.609375		0.594691			0.5528	0.544532	0.524305	0.564074	0.713052	0.943054	1.16555	1.29676	1.34427		1.39631	1.45062		1.42003	1.4221	1.40383
					3.84984	4.0289	3.86995	3.3449	3.37201		2.54876	2.84831	3.08847												1.77746			2.06837		1.31398	0.879587	0.891443	1.23994	0.943335	0.835692	1.09743		0.479774	0.917106	1.13655		0.958103		0.889141	0.816263	0.721676	0.716823	0.696125	0.666435
					0.905702		0.964767		1.44098	1.61913	1.52414		2.49543	2.32287	2.60648		2.73097	2.16381	1.9939	2.16081	1.85361			1.64468	1.42996	1.73557	1.32371	1.23818	1.29284	1.20298	1.34496	0.971649	1.28357	1.06426	0.966586	1.03477
					0.985223	1.02428	1.12529			1.06214					0.756501	0.795891	0.756577	0.698179	0.802894					0.770672		0.624764	0.686623	0.59249	0.635788			0.738504				0.473508	0.483474	0.667392	0.699913	0.806606	0.74769	0.715484	0.734455	0.713287	0.682717	0.679835	0.693252	0.686337	0.690475
					1.57688	1.76131	1.72884		1.64644				1.29738		1.38849	1.29709	1.33677			1.44516	1.30088		1.40542			1.25201					1.00847		1.11015	0.758354	0.853708	0.881117		0.976765	1.19475
					0.469971	0.456043	0.439439															0.523763	0.511514	0.514487	0.514985	0.541404		0.567882	0.553136	0.57282		0.535746	0.541509	0.550758	0.559254	0.59623			1.13953		1.41388	1.46569	1.47793	1.42958	1.40406	1.31016	1.2828	1.26022	1.18197
					0.76149	0.721224	0.820431		0.925924	0.850185				0.89747	0.815438			0.790159	0.752343						0.77455			0.852491		0.868557	0.888218		0.903071	0.92569	0.948026	0.920652	0.979919	1.18012	1.39814		1.6089		1.72038	1.81825	1.86434	1.89172	1.87693	1.8726	1.8537
						0.708226	0.738849	0.724736	0.811395		0.809916		0.931572		0.856545	0.88478	0.896133	0.784788	0.805102	0.841108	0.891204	0.915829		1.02679		1.05504	1.05332		1.00453	1.02252				0.818173	0.765289	0.707546	0.688085		1.21514	1.53606			1.87251		1.77143	1.72235	1.65166	1.56774	1.49606
						1.14849	1.06406	1.10651	0.701087			0.962387				0.988808			1.01209	1.10374		1.00886		1.04173	0.976644	1.05629	1.13932	1.10343	1.07921	1.1143	1.02621	1.14842	1.15307	1.09359	1.18456	1.17593	1.30854	1.58555	1.86776		2.23515	2.30926	2.33359		2.62787		2.87213
							1.97071	1.77751	1.40859	1.10843	1.21812		0.914657	0.799457			0.878824	0.447373	0.720934	0.834309	0.699976	0.863855	0.338352	0.282077	1.59858	0.389521	2.24158	0.267867	0.23672	0.379487		0.314261	0.249172	0.273385				0.476008	0.688292			0.671935		0.589824	0.573875		0.553287	0.577923	0.597629
								0.317853	0.332084	0.334249	0.453137	0.398214		0.401232															0.536841		0.594954		0.545008		0.528673	0.562694	0.556172		1.02242	1.19754				1.47298			1.52637	1.50358
									0.763053	0.79091	0.768581								0.624186						0.491194			0.480583				0.424617	0.431371	0.438838	0.509753	0.483986	0.517133	0.626972	0.690529	0.774445	0.894184	0.916365	0.969256	1.00495	0.938202	0.994585	1.93018		2.00673
									1.11933	1.23214	1.23298	1.24794	0.980215	1.10371		0.996199	0.959261					0.931979	0.932063	0.827419	0.923103	0.984113	0.955102	0.977145		0.899939	0.988449	1.0921	1.0666			0.920555	1.18704	1.04029	1.25276				2.76486			4.06611	3.42721	4.01977	3.21115
																							0.43896	0.410061	0.432142		0.435143	0.430684	0.423841	0.460592	0.432042	0.499778	0.456819	0.479524		0.464822	0.614588	0.567527	0.618203	0.588731	0.618717	0.776561	0.843036	0.914655	0.979665	1.07262	1.13078	1.12174	1.11734
										0.84885	0.994185	1.15581				1.31438	1.3604	1.27232	1.3585	1.11958	1.09357		0.875413		0.862414	0.771048	0.771676	0.683788	0.672621	0.66506	0.699226	0.700338	0.672752		0.640368		0.674209	0.792755	0.981336	1.09852	1.13953	1.18753	1.23511	1.27299	1.25455		1.33787	1.30154	1.32335
										0.24104	0.23248	0.217851			0.262909			0.189693	0.169996	0.175661				0.17148	0.174497					0.215939			0.275324		0.289823				0.718834	0.902553	0.961892		1.03431		1.00525		0.998442	1.07249	1.08856
										0.574198	0.532574	0.309864	0.411416	0.643623	0.795396				0.531971		0.547556	0.512315	0.523004	0.441188	0.458079	0.472077	0.44324	0.421326	0.446012	0.427995	0.428584	0.427714	0.39928	0.458435	0.438195	0.419158	0.434182	0.583636	0.732074	1.00916				1.26559		1.22923	1.25593
												1.03897	1.18449	1.24224	1.17642			0.445268	0.393169	0.377885	0.298825	0.308438		0.303042	0.286257	0.293116	0.310677	0.306104	0.318718	0.322819	0.316241	0.331526	0.330945	0.318388	0.333232	0.333685	0.381614	0.537444	0.744266	0.930452	1.06926	1.14136	1.09933		1.15679	1.11635	1.08353	1.10851	1.10436
												0.321634	0.313703	0.33764	0.355511	0.353207		0.340397		0.319323	0.319607	0.325514							0.35787				0.329431	0.33519						0.849465	0.900378	0.930518	0.907687	0.833533	0.806471		0.771367	0.798531
												0.644625	0.604848	0.652188		0.737611		0.730318		0.71201		0.70034	0.686638	0.671618	0.675344	0.643478	0.648705	0.624089		0.588011			0.531645	0.512715	0.492192	0.487395	0.475195	0.620006		0.986138					1.17283	1.24482	1.28573		1.32563
												1.36686	1.29191	1.26677	1.30012	1.25184	1.37341		1.36857	1.36142	1.32158	1.17588	1.17008	1.19112	1.07687	1.04415	1.04736	1.0665	1.12308	1.11224	1.06727	1.09011	1.05841	1.08122	1.06862		1.23129	1.42078	1.50811	1.70412		1.75706			1.82467	1.90138	1.79023	1.84149	1.81809
															0.493767	0.470174	0.44504	0.500343	0.518827	0.367549	0.390492	0.353682		0.317783					0.387727	0.38602			0.488695			0.485378			0.784456						1.13756	1.08403	1.10705	1.16741
																0.452431	0.354651	0.358113	0.336856		0.344975	0.347804	0.334376			0.325166		0.312481				0.300392	0.288521	0.298767					0.468492		0.554437			0.609953	0.626115	0.601622	0.601387	0.592182	0.590152
																														1.44912	1.59803	1.57108		1.72387			1.73846	2.02097	2.3514									3.10331	3.04845
																	0.657218	0.644223	0.577066	0.560298		0.569034	0.561891	0.56928	0.580175	0.571662	0.564956	0.577584	0.573746	0.619094	0.614945	0.65344	0.633317	0.603378		0.603994	0.767268		1.18326	1.36808	1.25266	1.48984		1.31415		1.33006			2.97747
																	0.944695	1.08236	1.01826			1.03641	0.876109																								1.84871		2.20087
																	0.777609	0.813242	0.731835		0.799695	0.804398	0.809018	0.777516	0.748123		0.718208				0.688689	0.712669			0.726643	0.737532			1.2793	1.46197		1.71186			1.71197		1.756		1.81223
																	0.690062	0.716456	0.631226					0.645709		0.66018	0.733307				0.726011	0.736125	0.792596	0.769576	0.770105	0.768404	0.842209	1.1728	1.44148	1.73227	1.82854	1.89801	1.84927	1.75035		1.61548	1.59677	1.58308	1.63611
																		0.957172	0.933274	0.950036		0.935439	0.961848		0.984405	0.972282			1.02575	0.967313	0.95908		0.929988	0.887338	0.926574	0.90601	0.935307	0.919712	1.0537			1.39993	1.52673	1.5485	1.71275		1.64807	1.70709	1.79572
																		0.313837	0.328317	0.323775		0.341712	0.310504	0.323352	0.315308	0.306239	0.288081	0.296128	0.293001	0.283432	0.302633	0.275146	0.280979	0.283886	0.273781	0.278853	0.293453	0.37061	0.456374	0.53386	0.624703	0.707497	0.741021	0.740354	0.780113	0.792415	0.824414	0.781527	0.773791
																		0.219074	0.214328	0.235731	0.215635	0.218784	0.219848	0.231076			0.246088				0.245574	0.254921	0.248049		0.266311				0.712786	0.87406	0.883094		0.937353				0.963903		1.00775
																			0.487964	0.48092	0.464574	0.478452	0.4758	0.470136	0.47116	0.471593	0.464629	0.471551	0.46628	0.470878	0.461762		0.452112	0.435432	0.450929	0.475002	0.542048	0.775452	1.05517	1.3826	1.66662	1.86412	2.00112		2.13552		2.23147	2.28514
																			0.394296	0.40466	0.487504					1.04312								0.739671	0.913763
																			0.932503	0.838762	1.03238	0.865063					0.946965	0.975933	0.893893	0.851619	0.904102		0.847612	0.787335	0.810958	0.810773		0.910288				1.19414	1.28269	1.31398			1.39597	1.52613	1.58349
																				0.689334	0.818088	0.815307	0.654606			0.750143											0.368111				1.09931		1.793	1.40061	1.65579	1.59037	1.47932	1.44758	1.44122
																					0.778636	0.463673	0.810658	0.727777		0.648996		0.426527	0.457563		0.701494							0.565705		0.715773	0.746589					0.807135		0.766124	0.828871
																					0.593309	0.614618	0.529848	0.507098		0.550802		0.580752			0.547994				0.578601	0.576634	0.610366		1.06477	1.32161		1.45592	1.43409			1.42622	1.45695	1.4365	1.41025
																					0.620338	0.63501	0.630662	0.648234	0.622431	0.630896	0.574523	0.568986	0.592045	0.591304	0.573626		0.572923	0.571455		0.581986		0.867429	0.934714			1.38981			1.67459	1.68543			1.68314
																						0.652406	0.598954	0.598485	0.536928	0.549272		0.585272	0.588667	0.539882	0.542683	0.525173	0.474791	0.478501	0.51236	0.475532	0.50554	0.668688	0.868313	0.973385	1.18421	1.17584	1.23478	1.30612	1.26337	1.24878	1.30661	1.29878	1.19337
																						0.486441	0.400511	0.348434	0.360501		0.393001	0.402813	0.412942	0.416468	0.404563	0.395809	0.403041	0.403865		0.416285		0.57653	0.710311	0.908731	0.989204	0.962517	0.926325	0.866785	0.874876	0.835918	0.847029	0.827299	0.883186
																						0.549331	0.447824	0.554547		0.510203	0.504197	0.487601			0.453728		0.542078	0.797675	0.626699		0.598866		0.996673	1.06913	1.0379	1.10635	1.08074		1.07038	1.00955	1.0167	1.04858	1.09887
																							0.755655	0.466642	0.493468		0.477587	0.473759	0.482725	0.471433	0.467749				0.445934	0.453811	0.483512	0.675274		0.928108	0.85276					0.786494			0.792877
																							0.880962	0.733428	0.83304		0.835856	0.808742	0.812562	0.740558	0.8254	0.818068	0.80566		0.754273	0.819215	0.88298	1.00667	1.33826		1.93314	2.08379	2.13963	2.13871	2.07372	2.04806	2.23048		2.23618
																							0.421553	0.399432	0.351859	0.343348	0.507732	0.355618	0.379992	0.386765	0.442896	0.377568	0.367607	0.384212	0.476507	0.394157	0.443881		0.79777	0.912745		0.989914	0.914345	0.818124	0.769255	0.738688	0.702362	0.710724
																							0.50803	0.616247	0.59451	0.534385	0.53673		0.560053	0.54791	0.52222	0.520764	0.489258	0.543767			0.576021					1.22133		1.17089	1.17413		1.20312	1.23228	1.26543
																								0.405443	0.408929	0.420318	0.45431	0.427819		0.488879	0.509707	0.517167	0.508361	0.485158	0.52451	0.542316	0.575797	0.69954	0.924398	1.12468	1.17227	1.23755	1.24206	1.2726	1.28684	1.29537	1.34081	1.26428
																								1.00636	1.01595	0.981734	1.01272		0.991253		1.0017	1.03752	1.04787	1.08734		1.09011	1.17136	1.37097		1.97044	2.18418	2.20508	2.3664	2.19115	2.04768	1.95392	1.80117	1.9069	1.82891
																								0.994952	0.538604	0.859805	0.884843	0.887892	0.904653				0.944675			1.05087			1.7074	1.94057	2.19516	2.23204	2.35816	2.32114	2.25132	2.19101	2.42574
																								0.356695	0.306041	0.298363					0.2606		0.296884		0.2688	0.282813	0.300822							0.755641	0.75283	0.724519		0.714908	0.699031
																									1.48468	1.3731	1.36728	1.3838	1.26402	1.33292	1.36186	1.31335	1.2908	1.41595	1.38381	1.22279	1.33661		1.94511	1.90971	2.74556	2.3983	2.13471	2.1062	2.58568			1.87017	2.12121
																										0.358945	0.386787	0.314877	0.305134	0.320041	0.336481	0.332062	0.343359	0.332409	0.332008	0.339912	0.396269	0.589035	0.854146	1.0367	1.11964	1.16421	1.14839	1.16628	1.18182	1.19866	1.21921	1.16058	1.1136
																										0.984264	0.977652	1.07435	1.0755	1.15672	1.13942	1.09737	1.12525	1.06798	1.09532	1.0529	1.10526		1.7406		2.28636			2.68106	2.88303	2.99486	3.12096	2.95285	2.86577
																											0.327533	0.337862	0.330438	0.311236	0.278976	0.284652	0.260475	0.246131	0.251207	0.251704	0.299088	0.454243	0.664701	0.881568	0.951791	0.990526	0.889101	0.776893	0.721354	0.711305	0.71831		0.708345
																											0.315817	0.2949	0.349479		0.324344	0.364541	0.406849	0.383529	0.410013		0.472753	0.708108	0.94077	0.986801	0.992936	0.933513		0.865803	0.836348	0.858848	0.864642	0.805562	0.851007
																											0.513085	0.545622	0.60364	0.486429	0.470563	0.444199	0.458233	0.452921			0.441815	0.550847			0.780541	0.783505							1.01501
																											0.611521	0.532919	0.573522	0.505418	0.523932	0.558162			0.602331			0.840243	1.0584		1.18146	1.24564			1.27719	1.26331		1.37813	1.43059
																											0.323093	0.36847	0.381993	0.369505	0.296211	0.291892	0.278652		0.258533	0.287293	0.285247	0.406626	0.532537	0.564332	0.639621	0.61778	0.583286	0.599272	0.596943	0.570252	0.588105	0.619737
																											0.696644	0.562822	0.5007	0.540759	0.492443	0.438451	0.413744		0.381022			0.54284	0.689241	0.769549		0.786163		0.774011	0.790701	0.788616	0.738387	0.788839	1.02163
																												0.282946	0.258748	0.341818	0.307736	0.312289			0.265969	0.288678		0.487712	0.747736	0.830561	0.862692	0.871872		0.991864	1.01167	1.00991		1.0622
																												0.33882	0.339553	0.342502	0.302594	0.329358	0.308384	0.330218		0.301768	0.350837	0.608503	0.847691	1.03734		1.10447		1.1513	1.09335	1.10758	1.16095	1.22257	1.18439
																												0.580567	0.621401	0.369497		0.375217	0.334583		0.314408	0.309012	0.365605	0.401275	0.522376		0.674806	0.718404	0.753003				0.81376	0.789167	0.825181
																												0.346407	0.337391	0.568797	0.339553	0.323407	0.308268	0.32889		0.331216		0.538362				1.39595				1.394	1.40441		1.43416
																													0.53987	0.621662	0.586845			0.484498	0.403484		0.447029	0.562039	0.7255	0.863275	0.977948		1.11008	1.21173	1.24467	1.23449			1.3069
																													0.907723	0.840921	1.08258			1.22145	1.40803	1.34003	1.41069			2.65183	2.50166		2.40341	2.38124	1.99935	1.98321	2.18314	2.08579	1.97614
																													0.613919	0.680173	0.801923	0.670714		0.865844	0.714095	0.672149	0.660782		1.08303	1.28107	1.4027	1.58923	1.61263		1.53486	1.4356
																														0.472331	0.595576	0.40636	0.456151		0.401682	0.394385	0.447041	0.663012	0.766949	0.924268	1.01561	1.02725	1.09405	1.10902		1.07491	1.04047	1.01546	1.02546
																														1.11794	0.982103	0.982003	0.909956	0.958453	0.90517	0.963623	1.05419	1.29445	1.59359	1.77711	1.87423	1.95673	1.94619	1.91207	1.92174	1.9615	1.93248	2.04724	2.1474
																														4.71557	2.29428	2.32032	3.55867			1.78793	1.31155	3.86828			1.61233		1.6462	1.81393	2.04204	1.63636	1.49013	1.51475	1.42581
																														0.510309	0.471803	0.424719	0.426537	0.471585	0.470812	0.422305		0.660523	0.975748	1.20133	1.32351		1.47796		1.63254				1.77483
																															0.375033	0.297969	0.308858	0.288926	0.357892	0.345468	0.448946	0.43913	0.594474	0.662809	0.790885	0.700049				0.685861			0.667132
																															0.338211	0.539481	0.375931	0.40949			0.573866	0.64822	0.760938		1.1697	1.24986	1.27861	1.20541	1.24358	1.11242	1.15103	1.10504	1.09204
																															0.235075	0.232919	0.216946	0.21737	0.244458			0.330771	0.522025	0.634337	0.736836		0.748156	0.72743	0.700715	0.673083	0.646992	0.645663	0.681987
																															0.745451	0.665617	0.613174	0.47784	0.449382	0.409613	0.39209	0.480096	0.586068	0.67465	0.695729	0.711605	0.726091		0.73539	0.715827		0.731723	0.691627
																																0.142636	0.140426	0.159987	0.163595	0.157552				0.361649	0.40536	0.357654	0.384222	0.403398	0.426924		0.415845	0.511264	0.53768
																																0.294375	0.305144	0.358598	0.399526	0.362668	0.374963	0.519266	0.702311	0.698513	0.678919	0.703768	0.716141	0.742198	0.661166
																																0.250741	0.252212	0.241973	0.237576		0.301382	0.4349	0.596373	0.650292					0.883203	0.842752		0.798213
																																	1.87084	1.76905	2.19803	1.90326	1.48237	1.79279	2.98411	4.36967	3.91963	3.10246	3.62027	3.62453	3.89993	4.97526	3.58749	4.23657	4.73306
																																	0.391687	0.443067	0.493084	0.522287	0.427537	0.530239	0.643933	0.8187		0.941175
																																	0.605476	0.565368	0.521015							1.39237	1.44641		1.4258		1.4283	1.53601	1.46814
																																	0.442463	0.530762	0.514673		0.366278	0.571114	0.803191	0.849681	0.89791	0.807252	0.792223	0.737337	0.786938	0.763013	0.751101	0.794063
																																	0.305093	0.337458	0.322	0.337124	0.325367		0.664675		0.800229	0.732367	0.681151	0.61587	0.573343		0.5536
																																	0.710518	0.580733	0.833571	0.658531			1.54507		1.35664		1.23737	1.24106		1.16903	1.12752	1.14164	1.10466
																																			1.87455	2.02454		1.4942	1.81417	2.22406	2.58514	2.72235	2.96388	3.15339	3.22443	3.33681	3.16207	3.29704	3.06409
																																		0.600017	0.628029	0.594796	0.653794	0.848756	1.03263	1.19514		1.5593	1.64952	1.67153	1.71668	1.80774	1.75497	1.74277	1.66639
																																			0.36113	0.305824	0.322034	0.5094	0.661737	0.843998	0.811171				0.659076	0.729359	0.74302	1.47432
																																			0.691897	0.658755	0.458225	0.553426	0.702267	0.802447	0.927728	0.994664		1.0583	1.1024	1.0816	1.11498	1.04013	0.925022
																																			0.25476	0.266212	0.300431	0.430458	0.602722						0.725971				0.717925
																																				0.149046	0.173178	0.254009	0.358446	0.452891	0.483606	0.502852	0.503217	0.487007		0.482867	0.450056	0.437696	0.431989
																																				0.17597	0.199332	0.326307		0.45997		0.418581	0.365247	0.357475	0.335576				0.336715
																																					0.588423	0.76478	0.979033	1.27351	1.20836			1.42745	1.43924	1.45861	1.58777	1.37766	1.38767
																																					0.489221	0.53401	0.641877	0.677799	0.731255	0.802989		0.874877	0.89705		0.964019
																																					0.390877	0.489793	0.623302	0.735385			0.973554
																																							1.02938	2.5385	2.88017	3.38775	2.59845	2.79724	2.95547	2.41779	2.34068	2.3371	2.53771
																																						0.422408	0.570331	0.693858	0.828178	0.894822	0.9527	0.97827	0.973258	1.00934	1.02729	1.04856	1.08401
																																						0.727065	0.920573	1.14605	1.15756	1.42615	1.55726	1.29276	1.86943	1.95964	2.29811
																																						1.29351	1.20973	1.27628				1.4157				1.51145	1.41343
																																						0.553565	0.657425	0.690634	0.896265	0.815557	0.871356	0.730945	0.733391		0.772235	0.761648	0.739795
																																							0.556548	0.623647	0.690253	0.674533	0.701813	0.668477	0.653805	0.691996	0.675512	0.678172	0.672768
																																							0.795699	0.972701	0.935759	0.975323		1.07826	1.11295		1.01208	1.05596	1.01158
																																								0.878456	0.900419	0.876047	0.906141	0.897816	0.811929	0.791511	0.752459	0.769756	0.778901
																																								1.23445	1.33741	1.6308		1.57156	1.48821		1.60878
																																									0.935889	0.914913	0.918173		0.911732		0.814156	0.824794	0.804564
																																									0.890377	0.9869	1.09593	1.11861					1.2944
																																									0.872074	0.796249	0.865905		0.757774		0.757749
																																										0.647645	0.625758	0.658143	0.667352	0.63267	0.640091
																																										0.584851	0.572524	0.54668		0.526792	0.491562	0.466787
																																										1.1422	1.13708	1.07174	1.04445	0.984501		0.927123
																																										0.621663	0.661902	0.553268	0.632397	0.704586	0.668868	0.595876	0.563529
																																												3.5958	2.96581	2.70304	2.80402	3.09586	2.98753
																																													1.15795	1.15364	1.12337	1.21238	1.22366
																																													0.47926	0.529073	0.487094	0.465222	0.471746
																																													0.456589	0.404873	0.371795		0.361999
																																													1.12628	1.10448	1.16484	1.09996	1.10507
																																														0.939673	0.960902	0.983804
																																															1.62989	1.47562	1.50367
																																															1.32202	1.3549	1.36498
																																																2.94012	3.07469

0.833553	0.851023	0.776189		0.91662	0.872607	0.880016		0.891396	0.863288	0.86481	0.861723	0.863182	0.841066	0.916301	0.917095	0.903498	0.91829	0.883208	0.895221	0.818976	0.852825	0.851961		0.835183	0.833189	0.794503	0.8638	0.860142		0.785073	0.797332	0.877333	0.872334	0.885162	0.873078	0.863871	0.899586	1.05777	1.22234	1.36067	1.86897	1.95351	1.99464	1.9909	2.13568	2.11047	2.01765	2.19005	2.11172
0.553639	0.588905	0.668247				0.724362	0.797108	0.838668		0.827002					0.895628				0.922093	0.773125	0.753681	0.734285	0.737146	0.762363	0.811908	0.851676	0.790167	0.846036	0.858537	0.81245	0.86991	0.847639	0.817998		0.833153	0.768253	0.889885	1.06751	1.32142	1.63479	1.84491	2.04224	2.16877	2.19589	2.24201	2.25961	2.16187	2.26514	2.22918
0.656376	0.640081	0.798592	0.781619		0.803672	0.747028		0.697017	0.702005			0.835709					0.639477		0.589344	0.587707	0.622732		0.597518	0.633695	0.617968	0.641444	0.702607	0.735038	0.717635	0.714025	0.768624	0.955888	0.823088	0.79777	0.838265	0.888979	0.88493	1.22486	1.18723	1.45838	1.43926	1.65402	1.66281	1.73226	1.73068	1.77469	1.67536	1.70464	1.64515
0.499239	0.478557	0.488282	0.51574	0.660003	0.448908	0.450503	0.594626	0.44408	0.46104	0.56064			0.543258	0.601337			0.37914		0.353895	0.353559	0.369019		0.403974	0.379547	0.404122	0.422717	0.472524	0.502794	0.526023	0.527748	0.533529		0.550797	0.537523	0.542199	0.580564	0.640127		0.921946	1.04683	1.11367	1.07895	1.14621	1.17737	1.19842	1.27469	1.28857	1.28419	1.28002
0.627763	0.607401	0.627748	0.609815	0.610191	0.527319	0.527821	0.3918	0.518369			0.347815	0.45545	0.581878	0.365316	0.463338	0.410399		0.4055		0.276444	0.336461	0.34478	0.325812	0.276063	0.34004	0.367567	0.236545	0.304702	0.366323	0.413833	0.362268	0.279284	0.399996	0.414604	0.503281	0.396192	0.435647		0.616638	0.523642	0.779267	0.792036	0.848716	0.876258	0.8871	0.821526	0.891974	0.844029	0.974151
0.425404	0.438883	0.411795	0.426784	0.410932	0.397913	0.42686	0.447891		0.45938	0.393486								0.378778		0.516946	0.367373	0.360934	0.411201	0.345055		0.382352			0.44394	0.437177	0.439966			0.453785	0.462899	0.479235		0.870372		1.44619	1.4173		1.23663	1.13259	1.08892	1.09307	1.09656	1.11311	1.15265
0.560603	0.568005	0.602179	0.68575	0.776971	0.770238	0.737351	0.803031	0.744239	0.76443	0.744218	0.820845		0.824764	0.787135		0.81419	0.778239	0.798864	0.788268	0.811026	0.807777	0.85398	0.926533	0.895078	0.866556	0.854049	0.851868	0.830844	0.803879	0.74094				0.8167		0.930365		1.14693		1.42393	1.47986	1.50673	1.56111	1.5773	1.6149
0.552984	0.567216	0.55715	0.541046	0.552028	0.585093	0.591482	0.510334		0.511264	0.485496	0.486439	0.469852	0.484209		0.454146	0.387384	0.377657	0.347154	0.329355	0.309069	0.317973	0.327592	0.329069	0.330099	0.330358	0.337322	0.338855	0.341042	0.369877	0.373095	0.394077	0.420052	0.418983	0.434968	0.46167	0.465135	0.496143	0.649794	0.822056	0.969411	1.07062	1.18352	1.27616	1.28954	1.28866	1.33307	1.3055	1.31145	1.31145
0.441176	0.461858	0.449284	0.433319	0.542618	0.491709	0.500583	0.534403	0.532418	0.456998	0.559392						0.651977	0.564146	0.46576	0.431919	0.446787		0.38592		0.400763				0.411404		0.395588	0.397665	0.421434	0.398848	0.411319	0.393874	0.396489	0.421115				0.77479	0.78754	0.810154	0.842828	0.929636
0.108003	0.114557	0.197797	0.210973	0.240094	0.320562				0.363676		0.37728	0.437534	0.449377					0.541776	0.461904				0.517327				0.56249	0.563794	0.604252	0.632262	0.670513	0.619358	0.603741	0.604298	0.58506		0.593189	0.659866	0.790455	0.8358	0.896001	0.952537	0.97409	0.981401	0.883666	0.995997	1.08228	1.01567	0.945223
0.48567	0.501125	0.511963	0.511775	0.510243	0.503907	0.532409	0.556299	0.56734	0.567534	0.564754	0.573474	0.593841	0.608969	0.658366	0.638976	0.673715	0.666698	0.628258	0.638431	0.603192	0.613265	0.626624	0.655063	0.662497	0.657947	0.660423	0.698954	0.71095	0.744156	0.78136	0.831395	0.812578	0.810583	0.753534	0.769894	0.780823	0.845293	0.941633	1.03613	1.17351	1.26537	1.35416	1.45459	1.49507	1.5219	1.50513	1.50454	1.48786	1.46731
0.508448	0.450676	0.54081															0.625915	0.570277	0.572821		0.653193	0.560342	0.553767	0.517439	0.527168	0.543715	0.586623	0.591304			0.61163		0.593569	0.60664	0.595392	0.604512	0.725931	1.01959	1.24924	1.49913	1.64138	1.62011					1.44285	1.41866	1.44229
0.500533	0.476155	0.407886	0.472593			0.508465	0.564161		0.599577											0.476011	0.469008		0.429728	0.446149	0.464574	0.43223	0.432011	0.507048	0.497939	0.481359	0.50378	0.525308	0.539772	0.517752		0.546891	0.564564	0.706826	0.851537	1.00683	1.00596	1.10389	1.11198	1.11582	1.2017
0.442638	0.423618	0.4348	0.397704	0.43849	0.409008	0.437604	0.47075	0.414916	0.478017	0.469385	0.476992	0.492645	0.499676	0.427148	0.409492	0.411965	0.416982	0.503462	0.531578	0.550642	0.513418	0.535813	0.538388	0.567016	0.821171	0.854272	0.801339	0.867528	0.748979	0.7701	0.718666	0.734879	0.715703	0.759677	0.768638	0.732469	0.845285	0.893541	0.987112	1.03385		0.984834	0.987735	1.0432		1.02012	1.09715	1.03573	1.07415
0.699209	0.976854	0.666832	0.615779	0.870714		0.80278		0.782988	0.809993	0.982924	0.833226	0.916432	0.796097		0.829351	0.694558	0.631735	0.566709	0.547039	0.54713			0.524961	0.513353	0.512838	0.450924	0.459563	0.495932	0.472137	0.460541	0.47492	0.452701	0.492832	0.509091	0.499077	0.498351	0.554988	0.632066	0.799971		1.05767	1.09995	1.19043	1.2814	1.30382	1.2915	1.44546	1.43268	1.37133
0.329196	0.320985	0.323405	0.339192	0.304031	0.312131	0.331805	0.408126	0.381216	0.421013		0.436352	0.429072																								0.446986	0.482062		0.835855		1.10572	1.10766	1.2599	1.2948	1.22167				1.36369
0.645196	0.658972	0.70782	0.780944	0.950022	0.816172	0.691354	0.905533									0.923175	0.79921	0.834378	0.645839	0.622778	0.636319	0.644084						0.661684	0.555171		0.594382	0.613489	0.622974
1.81662	1.82157	1.86212					1.90237								1.6301				1.18736	1.13813	1.05452	1.01426	1.10797	1.0572	0.981647	1.08636	1.01374	0.939985	0.986794	0.924608	0.904651	0.853471	0.768883	0.781859	0.79616	0.824575		0.978861	1.0447	1.03015	1.08493	1.19595	1.22849	1.19196	1.16729	1.22073	1.16439		1.19199
0.647736	0.675221	0.480622	0.692544	0.73626	0.685091	0.710478	0.650389	0.666338	0.632318	0.81378	0.620867	0.573442	0.55439	0.555776	0.534673	0.487771	0.476116	0.481345	0.534886	0.476884			0.58577	0.551093	0.497737		0.530713		0.515481	0.513211	0.522973	0.5277	0.530781	0.516732	0.507035	0.498153	0.499221	0.622155	0.737885	0.82054	0.901192	0.943465	0.979465	1.00135	1.01943	1.00802	1.02271	1.0264	1.01944
0.322485	0.301548	0.336092	0.352625	0.384697	0.466007		0.407586	0.475932																0.319925	0.358457	0.295262	0.338173	0.318295	0.342029	0.314852		0.315684	0.302427	0.300723			0.349696	0.403894	0.53213	0.598891	0.70685	0.741405	0.748032				0.813435	0.816327	0.800041
0.450408	0.508182	0.453033	0.524861	0.515545	0.558052																0.764394		0.689861	0.647972	0.638202	0.59454			0.656224	0.674695	0.688725		0.680834					0.874086		1.23852				1.62962	1.58622	1.70495	1.69177	1.66875	1.57952
0.564733	0.54763	0.557148	0.543549		0.551897	0.556619	0.508847	0.515408	0.52029	0.592486	0.590544	0.559122	0.713056			0.638888			0.652856	0.68959	0.615243			0.410173	0.384468	0.405106	0.437698	0.446747	0.448583	0.460927	0.426003	0.46983	0.489253	0.482774	0.475875	0.477541	0.531374	0.645684	0.792691	0.925826	0.998026	1.03222		1.16185		1.20714	1.22669	1.16578	1.24422
0.553951	0.570088	0.574557	0.667674	0.681956															0.684069	0.581272		0.6236	0.595064	0.654625	0.593612	0.607696	0.622187	0.606829	0.621171	0.592055	0.595768	0.569148	0.560248	0.585788	0.548711	0.505353		0.62395		0.966124	1.16369	1.27009		1.28326	1.39848	1.33539		1.31565	1.2689
0.351982	0.335526	0.348223	0.367823	0.359566		0.389594	0.408367		0.472008		0.519685	0.465825	0.48656			0.533299			0.422428	0.441574		0.504083	0.47459	0.532404	0.545858	0.587791		0.673304		0.759854	0.825542	0.839526			0.87346	0.884889	1.01243	1.3236	1.51317	1.84002	1.9227	2.07286	2.19551	2.20411	2.25301	2.24981	2.36783	2.52788	2.51558
3.81187	4.9029	5.60316			0.750759	0.788361	0.799764	0.825554		0.899944	0.88095	0.888328	0.875422	0.969823	1.1282	1.01266			0.588367			0.41558	0.521911	0.41963		0.448032	0.4655	0.449748		0.458051	0.434332	0.459452	0.417686	0.440435	0.461716	0.45167				0.887465	1.07148	1.13382	1.12143	0.873225	0.920498	0.856234	0.871715	0.820898	0.864945
0.283273	0.254612	0.26663	0.229208			0.249518	0.235063	0.321252			0.377373		0.545721	0.553136				0.67894	0.716302	0.579524			0.675295	0.562323	0.529368				0.523916		0.493101	0.517481						0.607072	0.763432					0.860449		0.820893
1.44763	1.39773	1.32737	3.62251		3.49738										0.440311	0.405678	0.418757	0.395262	0.346255	0.334958	0.324291			0.321081	0.313783						0.33124		0.323147				0.333399	0.448329	0.578313	0.702161	0.83357		0.966804	1.02581	1.04452	1.05831	1.06325
1.22241		0.840069			0.755781	0.763693	0.791772	0.778423	0.775	0.838241								1.30693	1.14542	1.66114		1.70124			1.78054			1.57114		1.48355	0.934382			0.700857	0.695058							1.79308		1.99972	1.96865	2.20757	2.22309	2.55899	2.65261
0.389487	0.432082	0.425899			0.530822	0.562701											0.53071		0.451897	0.390137	0.382266	0.416333	0.487463	0.370711	0.334494	0.364903			0.36179			0.324538	0.323464		0.323171	0.328259				0.536087	0.533706		0.624723	0.620998	0.683657			0.710064	0.706416
0.384349	0.575934	0.483053																					0.576019				0.487645		0.419813	0.385894	0.460524		0.431709	0.424778	0.418961	0.411483	0.422558	0.544068			0.9038	0.914064	0.932615	0.983246			0.898234	0.92617
0.378666	0.43134	0.520304	0.512607															0.640036	0.818564		0.523945	0.506304	0.694605	0.53545	0.458721	0.490754	0.413966	0.405039	0.49476	0.414388	0.427032	0.425058	0.436661	0.411731	0.374118		0.481973	0.565447	0.684676	0.755878	0.805204	0.877622	0.861068	0.936632	0.862381	0.872757	0.932909		0.863814
0.26595	0.286965	0.27643	0.315117																	0.226697		0.272303	0.341087	0.303585	0.302554	0.272424	0.211682	0.216883			0.207616	0.200059				0.199993	0.20134	0.272086				0.547904		0.629582
0.403337	0.466102	0.408812	0.3735	0.380123																						0.467716	0.513313	0.476779	0.452141	0.478748			0.401441	0.445768		0.446066	0.433269	0.5288		0.801216	0.956673	1.1		1.02793	0.995088	1.06394	1.1466	1.08044	1.06568
0.285269	0.272827	0.300591	0.275143	0.295031	0.286232			0.295176	0.333086	0.312191		0.357041	0.276999	0.305306		0.422947	0.34293	0.320512	0.357473								0.460908	0.506265	0.512372	0.481926	0.492176		0.450878		0.476728														1.26079
	1.72092	2.09353																																			1.72702		2.78958		3.37263						3.69623	3.63344	3.36125
	0.520088	0.523014	0.554495	0.532615	0.603255	0.730383			0.576895									0.385689	0.362858	0.343998	0.336312	0.310568	0.314387		0.341135	0.332501		0.391665	0.41818		0.410461		0.393233	0.41537	0.399778			0.496263	0.631361	0.705883	0.7426							0.837354	0.948732
	0.31516	0.363381	0.350999	0.326319		0.340681																0.336423	0.353757	0.355327	0.403358		0.409164	0.40185	0.3921	0.460857	0.452698	0.479618			0.467341	0.478494		0.922205				1.60471	1.56796		1.46825	1.42721	1.40563	1.35266	1.36954
	0.415077	0.399482	0.432014	0.424203	0.406554	0.393452	0.385196		0.412055	0.395817	0.402374	0.415147	0.472561	0.451804	0.510561	0.466264	0.417656	0.407445	0.385538		0.447825	0.461261	0.446874	0.47025					0.566759	0.568557		0.546204			0.580844	0.530332	0.570674	0.774874	0.959976		1.20596	1.23744		1.27502	1.29748			1.21175	1.26697
	2.12492	1.67028	1.90913		2.60648	2.04102	1.7893	0.267015	0.284388	0.255219		0.324125	0.295864	0.541303		0.399835		0.198545	0.172789	0.178223			0.196077	0.19591			0.19854						0.207813	0.222096	0.237579		0.271774	0.407271	0.52958	0.641996							0.660084
		0.235046	0.228577	0.254407	0.268813			0.298495	0.302731	0.35309	0.320849	0.335615	0.306552	0.346277	0.365955	0.338035	0.334195		0.303653	0.31926		0.308282	0.328848		0.345485			0.345322	0.334179	0.342302		0.333821	0.326016	0.320739		0.326401		0.488918	0.686162	0.778181	0.845065	0.889094	0.916619	0.934026	0.994898	1.02318	1.01152	1.0571	1.10409
		0.503957	0.4642	0.515619														0.678334			0.504605	0.599088	0.652962	0.59474	0.609969	0.597976	0.645028	0.826263	0.678129	0.743413	0.775298	0.911464	0.709228	0.682525	0.728416	0.676009	0.643412	0.787648	0.788905	0.932773	1.05881	1.10271	1.1814	1.19891	1.29527	1.41303	1.59803	1.73411	1.85565
																																														3.06255	2.70087
		0.272937	0.264374	0.338398																																			1.52716	3.14546	1.98494		2.05964	1.99539		2.48366	2.50993	1.93122	1.92459
		0.516266	0.498348	0.522544	0.502785	0.497151	0.508202	0.552336	0.540501	0.543017	0.581645	0.630798	0.748332	0.676592	0.674163	0.62866	0.755554	0.617336	0.697677		0.65039	0.670811		0.71804	0.669183	0.633678	0.599401	0.559075	0.540561	0.539898	0.545952	0.560109	0.554116		0.532872	0.512299	0.493341	0.607483		0.848725		0.880843		0.909459		0.930902	0.94178
		0.415545	0.385611	0.367872																								0.406889	0.419622		0.453147	0.44767	0.482592	0.497856	0.508805	0.533865	0.564722	0.802978			1.38245				1.36662	1.28668	1.27466		1.18146
		0.365238	0.338167	0.399163	0.409141																				0.429187	0.400009	0.487364	0.425238		0.389435	0.432171	0.494378	0.378379	0.42084		0.374827	0.410599			0.687927		0.665792	0.651023	0.665387		0.723155		0.799414	0.848547
		0.32757	0.31648	0.350458	0.300919	0.317902				0.354113		0.355954	0.377983		0.347306	0.345635	0.379208	0.339345	0.33647	0.335062			0.377901	0.366277	0.344778	0.351033			0.404849	0.374584		0.379542			0.358426					0.734007		0.900252	0.986074	1.05429	1.10322	1.12975	1.14543	1.19931
			0.411819	0.416189	0.431711	0.438361	0.442759	0.445146	0.437341	0.428374	0.424684	0.422614	0.3862	0.405639	0.372536	0.349057		0.323012		0.303531		0.288027		0.292709	0.306175	0.333751	0.344661	0.34447	0.356293	0.364838	0.382184		0.403157	0.412204	0.420862	0.439862		0.606051		1.03151		1.39094	1.46787	1.53919	1.44308	1.51202	1.4354	1.4979	1.36242
			1.07122	1.13505	1.23655	1.08466	1.16505				1.19983		1.19366		1.19326			0.920701		0.889742	0.901352	0.865356	0.888076		0.86671	0.821326	0.791295	0.781729	0.736729	0.726401	0.671277	0.659227		0.530894		0.497155	0.488166	0.580876	0.837938	1.0472		1.20192	1.19712		1.34				1.50879
			0.534462	0.532275	0.601619														0.442646					0.413729			0.423089	0.402974	0.417056	0.430538	0.392594	0.403487	0.469276	0.388806	0.384462	0.401587		0.527585	0.634346	0.7029	0.848576	0.800835	0.811231		0.802799	0.819977	0.813873	0.839874	0.817819
			2.48225	1.09375	0.563746	0.556315		0.51024	0.50514	0.553706			0.477893				0.474592	0.447497	0.457693		0.477423	0.497434	0.540433	0.508479	0.510796	0.519729	0.536264		0.525378	0.520703	0.545375	0.542602	0.571257	0.626756	0.613906	0.619323	0.695011									1.36108
			0.896546	0.849542	0.888014	0.945755	0.936806	0.951155	0.910695	0.861925	0.932076				0.941376	0.918618	0.96844	1.06109		1.15909	1.24571	1.36904	1.3766	1.39685	1.33797	1.40403	1.33435	1.27746	1.33746	1.36118				1.24266			1.18555					1.65073	1.73141		1.64289	1.67082	1.58845	1.59263	1.68804
			0.683778	0.593079	0.602047		0.742044		0.617675									0.593436	0.511138											0.697586		0.66001	0.640817	0.691226	0.664436		0.735382		1.42321		1.76604						1.90887		1.83083
				0.375319	0.398896	0.35501											0.324492	0.25592	0.267197	0.241533	0.248521	0.264389	0.231209			0.222556	0.216847	0.219477	0.211125	0.219985	0.208789	0.217906	0.229266	0.240691	0.234991	0.26315	0.278009	0.413165	0.546162	0.669669	0.716799	0.788741	0.790589	0.766825	0.838689	0.783603			0.831123
				0.291482	0.307198	0.291945		0.394362		0.374518	0.317978									0.57323	0.810787		0.663643	0.673125				0.573947	0.583066	0.527829	0.634857		0.597844	0.571277	0.670324	0.56872		0.72994		1.00682	1.08238		1.22258	1.19982	1.25699	1.24579		1.29938	1.29693
				0.284338	0.259727	0.256833	0.26394		0.248095		0.260132	0.268497			0.247869	0.298102	0.245088	0.250647	0.240128	0.27094			0.293164	0.301952	0.305386	0.330292		0.358354	0.370923	0.379107	0.367603		0.372876		0.376946				0.776957	0.957135	1.06645	1.14031		1.20967	1.16328	1.12969		1.07022	1.04586
				0.320018	0.337122	0.336622	0.379102	0.491914		0.391313												0.457628			0.487972	0.46298			0.495974	0.495925	0.525609	0.517977		0.499965	0.541882	0.572525	0.664441	0.805629				1.1571	1.4133		1.70547		1.55196
					0.590704	0.451988	0.46015	0.492955											0.487858	0.541232		0.521054	0.528554	0.430404	0.441305	0.4715	0.475601	0.510987	0.40526	0.452059	0.48382		0.424292	0.558541	0.523607		0.336369	0.445866	0.525718	0.571451	0.628638	0.847547	0.713414	0.75445	0.745776	0.726997	0.697409	0.670107	0.712381
					4.497	4.09031	4.38086	3.99274		3.61318	3.4735		3.32302	2.70161	2.78769		2.16436	1.92278	1.72559	1.86512	1.82924	1.86895	1.34821	1.12116	1.05062	1.10051	1.0737	1.08533	1.3781	1.49899									2.9902			2.79893
					0.342449	0.371049	0.333493	0.409602												0.267938	0.271318		0.26512	0.277801		0.219033	0.238242	0.236354		0.306335	0.251027	0.223461	0.250901	0.213205	0.280905		0.280058	0.418858	0.623846	0.866744	0.964676	1.05278			0.948468				0.747953
					0.266224	0.259633	0.399092	0.263789		0.259816					0.404939		0.23434	0.233737	0.226826	0.239923	0.235883	0.23913	0.232946	0.221458	0.211631		0.224709	0.231804	0.241771	0.229387		0.22431	0.218465	0.228349	0.221436	0.208935	0.243235	0.318266	0.403022	0.502562	0.598616		0.757043	0.807066	0.839622	0.829417	0.818314	0.856295	0.887775
					1.01539	1.14187	0.987829	0.941523	1.09222			1.04677	1.02798			1.23058							1.06635	1.27842	1.23577	1.34528		1.18715	1.33225			1.31124			1.4929	1.60397	1.74689	2.20103	2.73698	3.19037		2.81429	2.84478				2.48385
					0.237922	0.262936	0.238317	0.206497		0.196985	0.207628		0.20467			0.204939	0.20322	0.161099	0.197948	0.195898	0.179807	0.208939		0.195441	0.188088	0.21107		0.230468				0.277256	0.286619	0.288269	0.309401	0.288526	0.314783	0.419054	0.53852			0.794329	0.835994	0.840996		0.835102	0.806904	0.804875
					0.714641	0.65923	0.576642	0.678708	0.582627	0.597168						0.345867	0.359502	0.374283	0.379562	0.42187	0.443548	0.478595			0.527757	0.537487	0.55068				0.572087	0.559091	0.560878	0.566863	0.550029	0.595429	0.673977	0.786324	1.02705	1.22872	1.41324	1.49292	1.48924	1.49379		1.43059	1.33799	1.28689	1.33761
					0.275905	0.272057	0.303258	0.357312	0.346062	0.43851		0.429607		0.450222	0.587323			0.469595	0.503062		0.533215	0.602241	0.65334		0.712819	0.7302	0.775279		0.805731	0.767673	0.75708	0.738171		0.771341	0.692704	0.72305	0.741438	0.872406	1.01356	1.14339	1.31237			1.5469			1.60545
						0.355901	0.404179	0.601207	0.949693	0.708919	0.327988	0.37585	0.371053		0.204346	0.153825	0.152456	0.0826604	0.0812736		0.064891		0.0161912					0.10584	0.0752001	0.133461	0.272405	0.209412		0.756226		0.909272		0.804954	0.942869				0.959828			0.910034	0.984559	1.03492
							0.559128	0.523404	0.513136		0.527371	0.724766		0.658938	0.864429			0.657298		0.595809	0.596079	0.675853	0.604485		0.661932	0.711544		0.601182			0.680009		0.644106	0.692761	0.63946	0.592345	0.653561	0.919829	0.973339	1.12381	1.28782	1.36547	1.52897	1.59617	1.67366		1.66381	1.67791	1.66987
							0.772434	0.662109	0.779517	0.786014	0.7787		0.839035	0.959229	0.960818	1.01924	0.971831		1.171		1.27153	1.05843	0.830898	0.845972	0.605071		0.770562	0.639096	0.819021	0.753348	0.763544	0.961607	0.957631	0.833228	0.834991		0.976967	0.968524	1.07239	1.16059	1.04336		1.06286	1.01483	1.12277	1.17436	1.13244		1.05346
							0.74619	0.627399	0.69494							0.853593	0.712173	0.973736	0.713638		0.821912	0.812203		0.578659				0.692846	0.610557				0.744337	0.586889			1.15067			1.32798		1.56905	1.64269		1.57265	1.59652	1.61046	1.6114	1.651
							0.257245	0.344006	0.34049	0.326948	0.396185	0.476459							0.411601	0.433772	0.404457	0.413915	0.379821	0.420854	0.34469	0.352627	0.317953	0.343163	0.314174		0.281499	0.275535	0.269182	0.270003	0.252036		0.304224	0.404501		0.615169	0.647979	0.620439		0.612006	0.627008		0.604769
							0.358323	0.379009	0.344983			0.341575	0.425728		0.312654	0.280484		0.302058	0.311657	0.293447	0.289689	0.286115	0.282271		0.278852	0.272458	0.280962	0.280125	0.259515	0.269878	0.257792			0.227514		0.206743			0.437889	0.531163				0.814772	0.800077			0.818801	0.829968
							0.394859	0.427388	0.424657			0.362164		0.453723	0.353914	0.319805		0.316899								0.27675	0.279644		0.339591	0.349132	0.366137	0.393317		0.386087	0.376041	0.361875				0.827957					0.854235		0.864642
								0.965108	0.898717	0.962066		0.921167	0.936495	0.914125				0.760536			0.740737	0.738224			0.729881	0.708143			0.693695	0.695158	0.687997	0.664666			0.619525	0.648465	0.668744	0.69396				1.21708		1.33348		1.21763	1.29093	1.30913	1.29272
								0.868652	1.01119	0.969117	1.0944	0.948859	1.09011	1.10974	1.10824	1.08205	0.942863	0.914753	0.887923	0.880864	0.873106	0.827596	0.848307		0.856749	0.866239			0.908809	0.912227	0.959296			1.12031	1.11733	1.20167				1.67187		1.91378	2.06993	2.13407	2.0535	2.06941	2.08934	2.11597	2.10487
								0.758255	0.767488	0.746655	0.826114	0.822913	0.800574	0.801132	0.784204		0.79291	0.816674	0.815126	0.77729	0.81187	0.868603	0.737493			0.711207		0.765667	0.731053	0.756216	0.791524			0.791763	0.832711	0.864255	0.987769	1.13243						1.98662	1.97		2.04186
								0.372652	0.400708	0.39423	0.396711			0.393532	0.411701		0.451264		0.39027	0.432225	0.398888	0.437381	0.48001	0.493814			0.46782	0.492567	0.485528	0.522255	0.556866	0.593301	0.567094	0.625473		0.621843		0.854335	1.02766			1.26427			1.50321		1.51239		1.49667
								0.464527	0.592121	0.579034										0.522065	0.564923		0.593213	0.59318	0.771984	0.687537	0.748414	0.757401	0.723573	0.679367		0.697032		0.681165	0.679572	0.668885	0.780477		1.05691	1.10177	1.08136	1.20535	1.31409		1.40394		1.36607
									0.437613	0.494335	0.550069						0.578836	0.570381	0.519412		0.434802	0.447355	0.462894	0.412234		0.503317				0.58795		0.626303	0.614305		0.596375				1.04809		1.22865
										0.679652	1.02453	1.4381		0.766367	0.684156	0.616868				0.739114			0.83966	0.815656	0.644311	0.605622	0.53171	0.461437	0.401245	0.385358	0.348475	0.304043		0.286896	0.285656				0.50263		0.599296				0.60558	0.590602		0.627745	0.6315
										0.457842	0.525821	0.541186	0.565424	0.513961	0.540731	0.531014	0.506984	0.4923	0.462853	0.478517			0.478019							0.49588	0.49387	0.519594	0.538029				0.557572	0.659303		0.994507	1.0464			1.0876	1.15689		1.15408	1.28635	1.28961
													0.301015	0.359438	0.359688	0.35394		0.374152			0.40145	0.401478	0.433449	0.436394		0.486274	0.494977	0.507593	0.486849	0.497359	0.519337	0.500809	0.485471		0.468383						1.43928				1.32182	1.31848	1.27583	1.28571
																0.889966	0.809791	0.779211		0.780291				0.775614			0.741656	0.747856		0.721852	0.695956	0.694014	0.685607	0.672629	0.705958	0.652111				1.77025		2.18601	2.20459	2.25569		2.13708
																	0.732541	0.81355	0.831408	0.750036	0.654433	0.58724	0.777666	0.614767	0.673547			0.664917	0.70462	0.681709	0.759163		0.684264	0.659227			0.846755	1.08076	1.31712	1.59747	1.77359	1.6528			1.98668	2.10531		2.05715
																	0.379788	0.385278	0.400851		0.42415			0.836526		1.30065	1.43594	1.48687					1.41482	0.980788	1.47222	1.01375		1.84534	2.06516			1.56438					1.64538		1.4449
																		0.369972	0.343964	0.33656	0.334232			0.351277	0.335626	0.353105			0.348201	0.360559	0.386661	0.380308	0.405862	0.4078	0.400332	0.426579	0.4443	0.580713		0.897454	0.993388	1.1101	1.1092	1.0462		1.01355	0.982726	1.02075	1.05417
																			0.865388	0.827476	0.808408	0.754263	0.71924	0.715876	0.699927	0.736517	0.712095	0.722536	0.738305	0.746563	0.752965	0.747636	0.729879	0.704049	0.719934	0.691707	0.736085	0.966234	1.12335	1.15987	1.19201	1.19236	1.13216	1.08739			1.01276	1.02364
																			0.577139	0.469324	0.476811	0.460206	0.465474	0.429331	0.469215	0.438139			0.457827	0.442727	0.510877	0.546497	0.55018	0.549531	0.531235	0.560596	0.62713	0.844106	1.07347		1.37205	1.52014	1.57103	1.50067	1.53636	1.56536	1.59298		1.58764
																			0.78647	0.736579	0.768828	0.671941	0.643892	0.660518	0.672884	0.74096	0.771792	0.738426	0.748585	0.732551	0.717053	0.767793	0.719862	0.77526	0.798922	0.76468		0.936177	1.30059	1.4871	1.64967	1.79342		1.93048	1.89646	1.9165	1.8463	1.82324	1.80861
																			0.516556	0.446345	0.438067	0.350876	0.373046	0.351866	0.368626				0.464565	0.448025	0.503018	0.456834		0.462547	0.425855	0.436426	0.461784	0.707951		1.1898	1.27699	1.31285		1.56444	1.68898	1.80243	1.99507	2.01453
																				1.43514	1.71377	1.54793	1.61455	1.96247	1.72136	1.61262	1.8501	1.84698		1.92151		1.85769	1.9136	2.11069	2.20276	2.2481	2.60578	2.81327	3.33676	3.98732		3.825		4.03381
																				0.603791	0.558853	0.487011	0.417613	0.442939	0.41464	0.411688		0.43153	0.416889	0.409717	0.456014	0.449693	0.464495	0.461449	0.468052	0.470498	0.490585	0.607558	0.76961		1.00998	1.05014		1.17159
																				0.381868	0.419775	0.353093	0.294093	0.288438	0.273366	0.289071	0.279204	0.304611	0.303711	0.286136	0.282692	0.30715		0.293025	0.30897	0.296682	0.31416	0.420236	0.541238	0.640993	0.697202	0.777196	0.806887	0.815741	0.824335	0.833677	0.841636	0.874125	0.844547
																					0.415285	0.412691	0.417311	0.412765	0.441576	0.473516			0.436239	0.460639	0.427989	0.417521	0.41952	0.404569	0.425678	0.433499	0.523698	0.698245	0.923528	1.06366	1.07325		0.986125	0.931999				0.865774
																					0.232652	0.218214	0.267706		0.286388	0.353938	0.278438	0.271394	0.27572		0.261661	0.257671	0.286963							0.873456		1.12942		1.16275	1.16904	1.20336	1.23536		1.22455
																					0.789202	0.845491	0.894751			1.21551		1.19734	1.07835		1.14745	1.1313	1.2136	1.18409	1.11393	1.03334	1.00242	1.35002		1.75665		2.10088		1.98346	2.05627	2.13558	1.91113	1.90232
																					0.604732	0.502781	0.429792	0.436994	0.369353	0.408444	0.402451	0.339629	0.341634	0.35074		0.342124	0.359613	0.338556	0.346616	0.349401	0.356103	0.414307	0.601082	0.660397	0.81017	0.884377	0.957288		1.05894			1.12727	1.18529
																						0.754878	0.65212	0.632346		0.606773	0.642223	0.65908	0.682789		0.69042	0.726263	0.734596	0.745204					1.36178	1.62202								2.05319
																							0.334652	0.212583	0.28485	0.235581	0.21595	0.223595	0.233677		0.230823						0.216422						0.587096	0.568143	0.582121
																							0.602069	0.574683	0.63152		0.677074	0.607704			0.612802			0.632191	0.605728	0.635712				1.13041	1.13531						1.25263		1.31634
																								0.470646	0.438569	0.431763	0.487585	0.523921	0.519287		0.517479	0.553138	0.533737		0.55062	0.54127	0.559653	0.776253	1.03399	1.26873	1.40009		1.54123	1.5491	1.54672	1.53678	1.49654	1.51554	1.50896
																								0.696524	0.710365	0.762554								0.911507			1.00201		1.61888	1.93212	2.06856	1.94315	1.90893	1.82785	1.73255	1.79269	1.70746	1.69039	1.69443
																								0.598026	0.390282	0.615831		0.414396	0.35667	0.45431	0.359896	0.444434	0.448211	0.403537	0.452802		0.491697	0.557747	0.700069	0.886086	0.95072	1.06334	1.1383	1.15001	1.27596	1.25888	1.29117	1.30181	1.30531
																								0.921046	0.911113	0.937034	0.952817	0.924026	0.875194	1.02915	0.934219		0.968318	0.856948	0.951549	0.958689		1.50791	1.98304		2.82732	2.89589		3.10541	2.92438	2.91003	2.8143	2.92646
																								0.405481	0.415762	0.411605	0.405171	0.433139	0.413595		0.433138	0.447732	0.453323		0.45463	0.468798	0.537569	0.699074				1.36316	1.52016	1.58871	1.68256	1.72526	1.59942	1.62353	1.67769
																									0.746667	0.641336	0.626991	0.608057	0.670361	0.743371		0.72744			0.733851	0.725052	0.816914	1.04018	1.2824		1.61794	1.67426			1.88592			1.60581
																									0.307617	0.469329	0.308514	0.330729	0.395898	0.347713		0.336181	0.350658	0.319085	0.368018	0.315462		0.469834	0.649679	0.823111	0.913831	0.91885	1.01526	1.08893	1.08352	1.1007			0.957171
																									0.512969	0.530195	0.529954	0.530103	0.544298							0.556566		0.788613			1.08757	1.07685	0.998822	1.00427		1.07548	1.14243	1.44944
																									0.583558	0.676243	0.584406			0.544428	0.611778	0.586601	0.585285				0.629661	0.704369		1.0071	1.16179		1.33847	1.40887	1.44618	1.494		1.5726
																										0.335657	0.351397	0.357712			0.368272		0.395825		0.378817			0.754385	1.10482	1.52206	1.74797		1.94038	2.01869	2.07651			1.97573
																										0.719856	0.694334	0.702825	0.680001	0.696899	0.693086		0.718547	0.731996	0.727645	0.734209	0.847538	1.18895	1.56788	1.9022	2.02079	1.96012	1.88867	1.93331	2.02484		2.06485	2.04825	2.08386
																										1.14794	0.910678	1.10737	1.01529			1.07549	1.18122	1.03713	1.10251	0.999536			1.76822	2.32798
																										0.685544	0.7015	0.660726	0.661934	0.664642	0.647313			0.594578	0.542055	0.634107		0.901794	1.19037		1.45041	1.58842	1.71452		1.53144				1.64009
																										0.559403	0.457999	0.476457		0.451106	0.472002	0.483935	0.46076	0.456747		0.471599		0.646983		0.883601	0.99337	1.04018	1.09749			1.11275	1.0718	1.0774
																											0.763107	0.463668	0.445283	0.366312	0.390668	0.430983	0.413048				0.433325	0.509546	0.580792	0.787303	0.708161	0.813412		0.96143	0.994454	0.937198	0.877197		0.902012
																											0.554651	0.471247	0.471906	0.454803	0.467778	0.439225	0.455388	0.473384		0.521925		0.756726			1.1054								1.02171
																												0.408788	0.415184	0.476758	0.340447	0.322636	0.322883	0.334904	0.297262	0.318968	0.348627	0.452925	0.617258	0.765131	0.833939	0.892912	0.948834	0.968287	0.966803		1.08213
																												0.646798	0.48444	0.566555				0.499206	0.488232			0.925653	1.24468	1.5644	1.82432	1.90805			1.90335				1.95591
																												1.7265	1.71464	1.54603		1.83664	2.0115					2.33892	2.46176					3.91438	2.91654	2.42594			3.52423
																													0.558078	0.566493	0.705322	0.553989		0.536617	0.540154	0.439067	0.477508		0.799061	0.921527	1.04823	1.1495	1.14077	1.13298	1.16009	1.17086	1.2076	1.20594	1.21301
																													0.408068	0.430727	0.427153	0.398318	0.402865			0.374616	0.389336	0.59156		0.919377	0.891705	0.845133	0.731772	0.641201	0.611014	0.631107		0.701778	0.70029
																														0.381975	0.403355	0.383191	0.396659	0.385055	0.361346	0.35295	0.350565	0.439805	0.510332	0.558297			0.672697	0.684546	0.690387				0.652135
																														1.03685	0.965249	0.738237					1.38268	1.5997				1.98261			1.96351			1.98594	2.11923
																															0.454505	0.452205	0.416432	0.402415	0.387763	0.45167	0.447708	0.55885	0.701763	0.840309	0.887417	0.928137	0.959027	1.00207	0.928969	0.966498	0.909625	0.920539	0.935676
																															1.21433	1.11985	1.11051	1.24663	1.19724			1.61641	1.97658	2.22158	2.26364	2.3429	2.37056	2.40009	2.3093	2.38203	2.392	2.29859	2.23504
																															0.647336	0.668885	0.666846		0.688833	0.671445			1.25376	1.47489		1.69248	1.73429		1.79502	1.68096	1.70889		1.69764
																																0.377266	0.355393	0.334031	0.359188		0.452842	0.549901	0.679525	0.792963	0.800361	0.800302	0.866393	0.803954	0.836592	0.801296	0.86895		0.835869
																																0.76833	0.766302	0.826002	0.922087	0.832456	0.963346	1.05555	1.36801	1.76738	1.78286	1.98371	2.19764				2.21973		2.3298
																																	0.236983	0.22343	0.253134	0.280918	0.334018	0.468982	0.65596	0.789671	0.809497	0.841854	0.804043	0.804192		0.890882	0.856084	0.863293	0.943353
																																	0.545169	0.566909	0.603618	0.617042	0.738417	0.874757	0.987093	1.1894	1.29455	1.4192	1.48804	1.56391	1.57452	1.70704	1.63541	1.61406	1.6281
																																	0.744118	0.784431	0.860041	0.76445		0.978634		1.17889	1.32023	1.51611		1.57577	1.8543	2.00732	1.94893		1.80357
																																	0.602506	0.581802	0.589356	0.605101	0.607216	0.7099	0.84491				1.11038	1.1573	1.10025	1.12862	1.22245	1.2627
																																		0.490032	0.514574	0.542123	0.650165		1.1241	1.2865			1.63692	1.71468	1.7052			1.55859
																																			0.421218	0.427611	0.499224								1.05336			1.10146
																																			1.01835	1.06325	1.24394	1.66155	2.00412			2.50323		2.29809	2.33805	2.41657		2.58723	2.49097
																																			0.801713	0.79101	0.869443	0.98054	1.08333	1.1857	1.18146	1.27249	1.38557		1.53832		1.75637	1.57558	1.67842
																																				0.681378	0.764465	0.898504	1.1463	1.46699			1.51204	1.43855				1.33747
																																				0.390998	0.420506	0.494587		0.739512	0.769824	0.833573						0.75979
																																				0.929277	0.829364	1.08552	0.974498	1.01117	1.1376			1.39567	1.4771	1.58719	1.72049	1.83417
																																					0.539555	0.632119	0.692337	0.728478	0.669991		0.762579	0.703226			0.7983		0.678554
																																					0.477211	0.620698	0.759859	0.873267	0.853435	0.830585	0.814129	0.803823	0.84823	0.863555	0.838281	0.775301	0.760763
																																						0.82275	1.02393	1.04837	1.14422	1.14874	1.13565	1.15563	1.12676	1.12479	1.09313	1.13023
																																						0.698847	0.858859	0.996851	1.11122	1.17357		1.13077		1.12204	1.13321	1.08529	1.10591
																																								2.56629	2.8103	3.06574	2.9042	3.02086	3.66218
																																									1.84316	2.18166	2.244	2.40989	2.44601	2.43067	2.60643	2.46738	2.57583
																																										3.18128	3.67743	3.77582		3.7677	4.06202	4.01522	3.74544
																																											2.19447	2.19275	2.14554	2.13333	2.4771	2.25083	2.06902
																																												1.29377	1.30875	1.28958	1.24793	1.25634	1.28452
																																												1.26359	1.21495	1.21035	1.23743	1.25898	1.20585
																																													1.40654	1.94565	1.86535	1.69022	1.64458
																																														0.829482	0.785994	0.847463	0.798187
																																														1.51921	1.54446	1.49567	1.62748
																																															1.25077	1.22152	1.2521
																																															2.65368	2.80133	3.04779
																																																1.52688	1.53093
																																																	0.946732

Treated with: 0.5xEAA
Replicate 1, Treated at time point 36
1.05459	0.492203	1.14167	1.2771	1.26723	1.23075	1.41853	1.58377	1.75771	1.65289	1.75806	1.89837	1.83428	1.71904	1.79119	1.80195	1.64153	1.75432	1.69841	1.51862	1.45465	1.44101	1.52207	1.57167	1.73318		1.24839	1.18174	1.44841	1.17922	1.22228	1.10056	1.14397	1.17024	1.5816	1.27013	1.17426	1.2223	1.27921	1.77602	1.52609	1.66115	1.63876	1.70393	1.71514	1.66028	1.79013	1.57473	1.5567	1.83951
0.354937	0.339606	0.284228	0.290538	0.31035	0.301985	0.382174		0.36915	0.433317									0.372785	0.339582	0.322171	0.387638	0.354743	0.309662	0.317295	0.348729	0.363264	0.33958	0.354435	0.35601	0.388377	0.344579	0.350861	0.341749	0.348055			0.414765	0.577042	0.720102	0.868124	0.971775	1.04524		1.08113	1.05905	1.06019	0.973885		1.08455
0.292565	0.363961	0.348647	0.393189	0.370799	0.365403		0.420076	0.490509	0.715912	0.816948	0.788219	0.855271		1.33678	1.31937	1.10607	0.885459					0.89492		0.516929	0.686933	0.733642	0.326011	0.432374	0.294346		0.343859	0.391294	2.458	0.383163	0.378244	0.390783	0.457304	0.668598	0.860551	0.893975	1.06295	1.11923	0.987673	0.799201	1.1559	1.0272	1.15342	1.19497	0.911323
0.458482	0.498025	0.446673		0.42261																		0.49709	0.541245	0.478682		0.521092		0.559769	0.512629	0.513215	0.4854	0.538591	0.516709			0.511679	0.588582	0.788439	1.15561		1.87712	2.1358		2.46349	2.51301		2.42964		2.26392
0.191458	0.217035	0.244163	0.196755	0.239992																					0.199997		0.194548	0.185695	0.202296		0.185103	0.193948	0.194646	0.204485	0.191451	0.203123	0.251019	0.347164	0.511963	0.653875	0.682983	0.655215		0.685937	0.657166		0.62029	0.638341	0.657825
1.7156	1.66507	1.3361	1.27158	1.4672	1.46877	1.46106	1.44336	1.04963	1.1015	1.19484	1.21446	1.25027	1.24369	1.08128	0.943529	0.950811	1.06311	1.16536	1.22646	1.19845	1.16895	1.22006	1.08412	0.992729	0.960455	1.01254	1.07013	1.1205	1.13557	1.06045	0.98007	0.987091	1.07187		1.06215	1.11441	1.11794	1.11781	1.11011	1.14507	1.24229	1.21329	1.27058	1.14552	1.20714	1.18015	1.12583	1.09356	1.10806
2.25383	2.3931	2.03074	1.65228	1.49797	1.22605	1.39384	1.24718	1.0282	1.06664		1.16591	1.03757	1.17743	1.11106	1.31697	1.10055	0.972165	0.979052	0.985769	0.969657	0.958067	1.0214	0.826496	0.78986	0.750477	0.983336	0.373027	0.675515	0.434115	0.484642	0.426865	0.439434	0.444585	0.402738	0.418688	2.34781		0.399559		0.525177	0.535767	0.58779	0.641187	0.714713	0.795668	0.818385	0.824913	0.864858	0.918817
0.872932	0.823983	0.814877																		0.409661	0.434422	0.340218		0.344455	0.332572		0.337929	0.317902	0.336466			0.354717	0.356676	0.35575	0.36891	0.385984	0.417637		0.792077	0.909905	1.00744	1.01926	1.02595	1.03982	1.08416	1.11935	1.13926	1.17405	1.23248
0.77431	0.880894	0.827345																																	0.362061		0.421591			0.901995	1.01802				1.07073	1.02142	1.03052	1.00871
0.369438	0.38102	0.419353	0.408389	0.415164	0.411922	0.471794			0.465464	0.489731	0.468514	0.427415		0.405984	0.442669	0.42412	0.42522			0.390584		0.36727				0.353584	0.361649	0.35046									0.47672			0.946473	1.0247	1.1075			1.29686				1.48502
0.445838	0.443645	0.461769	0.441528							0.257572	0.273467	0.294893	0.243741	0.243607	0.336327	0.342228	0.271831	0.262855	0.230945		0.263186	0.231167	0.215264	0.219744	0.213336	0.230066	0.210515	0.267903	0.220133		0.211436	0.247124	0.261077	0.270158	0.281394	0.275524	0.320664	0.456694	0.638578			0.902333	0.922938	0.962354	0.972736		0.998979		1.02886
1.05759	1.34345	1.48913	1.55313	1.76176	1.61981	1.85101	1.97381	2.03107	1.88604	1.82738	1.77882	1.73303	1.64899	1.46626	1.39459	1.46876	1.37544	1.34515	1.13672	1.2245		1.10029	1.00721	0.85234	0.869802	0.841018	0.726031	0.773768	0.743529	0.720707	0.669385	0.583885	0.595601	0.567591	0.562068	0.606898	0.623933	0.718199	0.813011	0.883908	0.964666	0.996095	1.01592	1.0189	1.04651	1.03719	1.05505	0.99851	1.01921
0.18249	0.20536	0.202592	0.269263	0.465294	0.429812																	0.308487	0.251095	0.457773	0.292747	0.352468	0.28263	0.277416	0.274852	0.28045	0.262078		0.276922	0.242344	0.248235	0.243747		0.401278		0.68027	0.686407	0.629844	0.59483	0.586557	0.619051	0.627918	0.599192	0.598787
0.584846	0.584979	0.520311					0.462454	0.436302		0.429458		0.378669				0.392869	0.423414				0.442703	0.434541	0.446855	0.586844	0.565826	0.547434	0.519757	0.544666	0.504415	0.465139	0.448077	0.46499	0.525253	0.443414	0.431541	0.40541	0.460348	0.617051	0.8704	1.09366	1.30781	1.42854	1.49583	1.59045	1.61958	1.61707	1.59499	1.72147	1.6336
0.391336	0.428599	0.451238	0.418485		0.486083	0.679071									0.606077		0.577385	0.549984	0.56245	0.564416		0.567333		0.553264	0.575418	0.609409	0.610041	0.602848	0.620445	0.646362						0.614516	0.664836	0.761009	0.95714	1.10485	1.24337	1.29387	1.28594	1.28504	1.21695	1.18352	1.14065	1.10925	1.09302
0.394256	0.325653	0.383181	0.617105																	0.542056	0.882874	0.60847	0.619646		0.614896	0.66189	0.637458	0.616112	0.595161	0.608208	0.602948	0.596364	0.602787	0.601625	0.636948	0.606674	0.650173	0.877018	1.15327	1.37399	1.40009	1.39871	1.38474	1.36383	1.36311	1.33923	1.32451	1.32453	1.30442
0.313243	0.337436	0.335588	0.364807	0.372705	0.448707		0.421831	0.507656				0.625332				0.709323				0.510786		0.556439	0.533685	0.541649	0.509846	0.519261	0.560095	0.521822			0.494718	0.519957	0.510802	0.566182	0.543233		0.60925	0.791519	1.01483			1.34328	1.34631		1.43625	1.46801	1.51316	1.5179
0.233319	0.237426	0.25263	0.237168	0.27853	0.297566	0.37431	0.28455		0.32034								0.349006	0.307019	0.285285	0.297212		0.320072	0.259515	0.296491	0.283682	0.278468	0.273812	0.261955	0.245326		0.247862	0.224479	0.209743	0.228559	0.249109	0.233		0.34518	0.433762		0.525531	0.568845			0.612699			0.605427	0.619901
0.480973	0.530735	0.531524	0.611371		0.84675																			0.458012		0.494389	0.494674			0.506247		0.533768	0.55406	0.55238	0.579474	0.581512	0.697001		1.03297	1.21819	1.32141		1.36703	1.38005		1.34525		1.30359
0.230306	0.24067	0.271248	0.291981	0.27245	0.314477												0.304057	0.249919	0.284508	0.255903	0.255337	0.280036	0.242154	0.241684	0.251944	0.238096	0.25182	0.270347	0.253455	0.272074			0.306791	0.311245	0.329054	0.355973	0.378552			0.587738	0.723127	0.742066	0.705741	0.709998					0.630283
0.153671	0.151507	0.16926		0.170188																0.567145	0.463975			0.472173	0.391059	0.43006	0.444171	0.431854	0.445546	0.431096	0.431305	0.407722	0.399615	0.421291		0.457203	0.517697	0.631491	0.770059	0.953566	1.0783	1.26892	1.34601		1.54475	1.63031		1.56971	1.54069
0.459143	0.490132	0.439185		0.543132	0.568398	0.492925		0.523117	0.450826	0.452173	0.503131	0.50098	0.450333			0.497774	0.549477	0.434835	0.432086	0.476388	0.444692		0.465096	0.475884	0.492402	0.41783	0.456395	0.468585					0.430019	0.424453						1.10288	1.35121	1.819	2.02458	2.32174	2.54859	2.55031	2.38051		2.52966
0.58007	0.626116	0.614349	0.695161	0.65856	0.681353	0.644887	0.660229	0.642292	0.68647			0.679744	0.628758	0.691775	0.56061	0.484424	0.436623	0.392328	0.443029	0.392768	0.362072	0.341671	0.347735	0.344706	0.347377	0.367999	0.400245		0.453927		0.47712							0.794566		1.30268	1.56607	1.81753		1.82391	1.78518			1.65502
0.326562	0.298706	0.304613	0.336912	0.349168																	0.564633	0.587521			0.474191	0.494697	0.483025	0.453923	0.44195	0.474625	0.455588		0.475969	0.517921	0.520495	0.508436	0.635917	0.777745	1.03547	1.37728	1.6278	1.70103	1.69878	1.71439	1.68162	1.69679	1.6591	1.66946	1.66975
0.27326	0.276138	0.257453	0.275406	0.282693	0.30829	0.242906		0.251745				0.173923	0.197062	0.166173	0.21522			0.229528	0.20956		0.206119	0.212779	0.195833	0.195157	0.194895	0.211436	0.211614		0.230794	0.252921	0.2425	0.276853	0.256342	0.260239	0.34206	0.267629	0.307229	0.41733	0.511029	0.667355		0.720063		0.684238
1.27452	0.917784	0.818146	0.832673		0.911619	0.846632	0.822784	0.768779	0.732689	0.862575	0.809134	0.916174	0.875891		1.03055	0.942709	1.13413	0.992852		1.06473	1.15975	1.00659					0.871813	0.845191	0.722023	0.746368	0.769827		0.77867				0.859078	0.914016	1.05644		1.10137	0.983653	1.14308	1.06738				1.19002	1.01975
0.725464	0.72576	0.727657	0.757708	0.724394	0.712047		0.961917	0.631902																	1.41684		1.01558	1.19263			1.18193	1.39864	1.29683		1.28755	1.13117	1.21339	1.59436		1.77213	2.0983		2.18164		2.34123	2.25913	2.2089		2.23519
0.44836	0.430354	0.519814	0.455311		0.454196																		0.479506		0.494569				0.478808		0.42525	0.48298	0.433533	0.440335	0.449041	0.452536	0.47074	0.700609	0.85055	1.0057		1.19332	1.17495	1.17621	1.11119			1.09681	1.16591
0.586947	0.642982	0.715155	1.49968	0.773057	0.705362	0.649023	0.907784	0.974459		0.825832				0.866168	1.0831	0.816928		0.825584	0.734882				0.801672				0.807924	0.887219		0.690047	0.626956		0.845018	0.645581	0.679197	0.581377	0.573394	0.667097	0.727806	0.749506	0.80297	0.786233	0.793358	0.824702	0.801368	0.81418	0.740532	0.685061	0.723341
0.539962	0.518107	0.630866	0.557768																				0.582337			0.679554	0.587164	0.565037		0.591062	0.615598	0.607284		0.647525	0.660407				0.834869		1.09218	1.1497	1.27704	1.32931	1.29826	1.26995	1.27199	1.28298	1.28421
	0.290211	0.298398	0.322036	0.349898	0.348067	0.404668	0.439842	0.437286	0.542011			0.684253		0.746991	0.673934	0.578088		0.485825	0.490808	0.495304		0.520258	0.523075	0.508374	0.508069	0.542515		0.549413	0.530347	0.514336	0.517858	0.522087	0.50288	0.520277	0.55767	0.579214	0.662308	0.890998	1.16328	1.35649	1.481	1.46379	1.49791	1.34652	1.2761	1.41397	1.36425	1.43833	1.34144
	0.533621	0.506024	0.387658		0.431706	0.415337	0.371075		0.495499		0.401741	0.428554		0.429229	0.409659	0.343887	0.367983	0.366506			0.294248	0.253613	0.251647	0.255998	0.267093	0.292583	0.314237	0.323078				0.293008					0.420209	0.542439	0.767162	1.20696	1.15877	1.22349	1.17165	1.20901	1.17657	1.14735	1.09839	1.1311	1.0785
	0.404741	0.407126	0.409276	0.356314		0.289278	0.284885	0.256037	0.274072						0.413059	0.406766	0.377241	0.376927		0.358361	0.351766		0.36938	0.369902	0.391479	0.393934	0.395537	0.397576	0.410937	0.414309	0.405839	0.407492			0.429913	0.498706				1.2953
	2.08383	2.2011	2.34347	2.59203	2.37347		2.66674	2.62644			3.10538	3.25685	3.27813	3.76597			4.25384	3.15364		4.07613	3.24581	2.86945	4.12307		3.33989			2.61952	2.75587	2.57395	1.97274	1.74125		1.7625	1.79624		1.43879	0.859693	0.962728	0.993514		1.32754	1.28518	1.44851	1.32779	1.32799	1.37194	1.26959	1.41783
	0.31865	0.358575	0.334562	0.384558	0.3013	0.315148	0.353254	0.382255	0.418495	0.516448						0.283688		0.229647	0.22365	0.20876	0.210756	0.241865	0.24579	0.244787	0.254306	0.264624	0.280676	0.286691	0.288251	0.279771	0.282038	0.304522	0.304248	0.325106	0.307238	0.316135	0.394929	0.574461	0.750787	0.879774	0.923557	0.933167	0.902644	0.905876	0.887145	0.889463	0.930027	0.94287	0.93719
	0.387364	0.369853	0.325747	0.347903	0.403289			0.394758			0.398877				0.435613		0.395675	0.329123	0.336007	0.341143	0.347483	0.329128	0.329636		0.336423	0.306113	0.307368		0.317797	0.324552		0.320513		0.31636		0.264216	0.312563	0.394252		0.574403		0.58536	0.595361	0.54509	0.504665
		0.324742	0.268549	0.251204	0.29327	0.260152	0.44732								0.4162	0.526737	0.380705	0.345685	0.316075	0.379861	0.340668	0.347039	0.369179	0.332934	0.332015	0.305356	0.288866			0.266217			0.260306				0.332622	0.419388					1.07106	1.04725	1.07501	1.10898	1.21867	1.35316
		0.308845	0.287896	0.300622	0.342897	0.317316	0.282057	0.327874	0.333784	0.392442				0.344837	0.38145	0.369218	0.328653	0.34299	0.352493	0.437157	0.341235	0.303341	0.310452	0.303019	0.337024	0.345997	0.385158	0.39854	0.394348	0.388518	0.392559	0.37873	0.398979	0.385489	0.386282	0.406287	0.429565	0.558629	0.687217	0.787906	0.884101	1.00063	1.0204	1.06538	1.07397	1.07387	1.04427	1.05334	1.03637
		0.116292	0.109955	0.133603					0.146169													0.741781		0.670558	0.692787	0.740586	0.714988	0.720713	0.73568	0.756667	0.818856	0.731886		0.813354		0.898527		1.1887		1.76396	1.8506	1.88985	1.90727
		1.13512	1.00355	1.17673	1.0151	1.06983		0.765402										0.818275	0.681471	0.730312	0.715109	1.10267		0.734466			0.981695	0.892162	0.791575	1.09566			1.49507	1.01246	1.41351	1.38572	1.54306	1.39208	1.19663	1.38172		0.988904	1.48642	1.26501	1.09026	1.13572	1.45808	1.08253	1.21014
		1.25565	0.797402	0.793039	0.728587	0.833069	0.931074	0.877635				1.03523					1.32745	1.21897		1.18281	1.12671	1.19526	1.21629	1.31788		1.11197	1.27045	0.904531	0.960414	0.828434	1.21796	0.960146	1.14231	1.17007								1.90841		1.85234	1.83432	1.79159	1.76306		1.8623
		3.21086	4.5105	2.42686	2.73646	2.37172	3.10103	2.49436	2.76175			2.57684	2.70473	1.68546																				0.476338	0.593416	0.513775	0.581901		0.504403	0.705216	0.587228	0.615406		0.661018		0.662653	0.66416	0.678248
		0.231832	0.208354	0.208847	0.222437	0.267994		0.2733		0.282681				0.309586			0.307231	0.310361	0.293005		0.298818	0.305709	0.30736	0.332736					0.694785	0.683887	0.662193		0.698266	0.681843	0.740736	0.819308	1.01928	1.43532				1.45809	1.5199	1.4483	1.50875	1.45265	1.36105	1.35917
		0.233457	0.209963	0.232904		0.241966	0.336112		0.306554	0.360092					0.474393	0.483364	0.432114	0.388315			0.386199	0.36219	0.357655	0.365193	0.364389	0.374143	0.380804	0.409073	0.416182		0.432811			0.427904		0.417937		0.737525						1.3361	1.27382			1.24003	1.25482
		2.08164	2.16125	2.55919		2.9119	3.03958				2.11915		2.31868			2.00186		1.98212			1.71275		1.52849	1.26375			1.32151	1.13128	1.32263	1.58508			1.40405									2.30196		2.55571
			0.471159	0.537445	0.467494	0.451841	0.47184	0.545982	0.494925	0.499062	0.50468	0.50619			0.484283	0.458315	0.406991	0.403174	0.396304	0.384872	0.367657	0.373595	0.359643	0.351828	0.350979	0.358325	0.349344	0.363244	0.373138	0.374141	0.367894	0.376192	0.366881		0.382233	0.39181	0.406247	0.577862	0.816466	1.05226	1.21375	1.30775	1.3501	1.3092	1.28387	1.25756	1.2016		1.17092
			0.389951	0.481395	0.477353			0.472156	0.463672	0.696961		0.577442		0.491974	1.42849	1.88906	1.59467	1.70951	1.60897		1.82351		0.858547	1.04597	1.49183	1.51055		0.968843	1.42667	1.18038		1.33799		0.934837	0.734956	0.864788	0.941787	0.914477	0.965036	1.1786	1.19728	1.34205	1.41531	1.50444	1.53077	1.54497	1.49576	1.46159	1.45516
			0.310839	0.327712	0.339331	0.454557	0.552743	0.412651							0.506338		0.432938		0.387357	0.414888		0.4076	0.441069	0.449573	0.476722	0.488801	0.517977	0.553739	0.567642	0.57309	0.620812	0.649909	0.726674	0.717046	0.736573	0.746942	0.834008	1.06306	1.48605	1.81575	2.0067			2.16696	2.15012	2.13334	2.0555
			0.718584	0.661262	0.779435	0.715532	0.715359	0.733392	0.90875	0.776907	0.875755	0.769084	0.871067		0.769717				0.670076	0.668936		0.639818		0.620099		0.580053	0.606216	0.602473	0.615379			0.625134	0.624158	0.6239	0.616197	0.635965	0.731821			1.22582				1.25771		1.11914			1.01853
			1.69905	1.2461	1.19013	1.17724				0.495919	0.557199	0.522794	0.460072	0.427171	0.473475					1.3434	0.449496	0.548703		0.508205	1.20509	0.685484		0.9302		0.887976	0.735271	0.895542	0.925094	0.886975	0.785442	0.457687	0.561331	0.596273		0.955897	1.08051	1.07793		0.78092	1.12673	0.886379	1.17025	1.21343	1.24398
			1.31317	1.29356	1.27896					1.48941	1.57307				1.53561				1.7133	1.87619	1.67362	1.56027	1.55714	1.29501	1.44216	1.38871			1.2058	1.45994			1.57542	1.48891		1.4865		1.47164	2.2317	2.35269	2.26992	2.34758	2.22072	2.215	1.93644	2.23421	2.03269	1.97981	2.23371
			0.323682	0.330605	0.321004	0.329184	0.318165	0.359443	0.35217		0.357679	0.339006	0.405159	0.585308	0.530506	0.537829	0.504844		0.482416	0.460734	0.470299			0.431494		0.387338	0.384737			0.471987	0.44637	0.481362	0.500579		0.467504	0.409784	0.441288	0.668917	0.846679	1.13418	1.21569					1.44052	1.45647	1.60286	1.48158
				0.412393	0.451931	0.418568	0.417723	0.460704	0.574917	0.578991		0.626044	0.701161	0.899202	0.75699	0.997066	0.995049	1.28701	1.28904	0.731455	1.17002	3.11454	2.5024	0.731809	0.763775	0.691622		0.475928			0.534549	0.538471	0.521341	0.615129	0.591005		0.728511	0.941508	1.06272	1.22084	1.33492	1.37771	1.34079	1.23156	1.20181	1.24999	1.22738	1.32008	1.244
				0.289579	0.294937	0.345137	0.332071	0.308346				0.448626				0.447167			0.48905			0.561416		0.599886		0.606549			0.686378	0.67024	0.631496	0.591437	0.645462	0.556669	0.582621	0.577002	0.600857	0.88326	0.980776	1.21126	1.27088	1.14967		1.13773	1.13821	1.15512		1.24474	1.37391
				0.670748	0.642341	0.488866					0.548694	0.467206			0.678352		0.869779	0.817586	0.904718	0.732825	0.698349	0.521764	0.603843	0.585464	0.642635				0.505152	0.401189		0.394461	0.373178	0.36294			0.424614		0.672995	0.72669			0.702407	0.72258		0.776259	0.779772	0.771225	0.778563
																						0.865449	0.670261	0.610216	0.644663	0.803388		0.57003	0.582079	0.60097	0.575342	0.514189			0.587404	0.612046	0.750965	0.847062	1.02975		1.31297	1.40619	1.39528	1.3557	1.41412	1.31749	1.33365	1.23307	1.19799
					0.231743	0.228835	0.19908		0.357304						0.324597	0.336803		0.208928	0.234791		0.150522		0.163247	0.172067	0.171346		0.187339	0.184769			0.201107					0.225085		0.396813	0.594096	0.780894	0.989997	1.08322	1.11411
						1.50152	1.64977	1.53374	1.44218	1.52822	1.36906	1.51557	1.50761	1.45116	1.29377	1.29715	1.2061	1.30805	1.37106		1.25346	1.28685					0.44476	0.411429	0.426793	0.414648			0.430777			0.411749		0.635242	0.822266	1.03563	1.14747	1.25695	1.36369	1.45938	1.58716	1.57407	1.55838	1.4245
						0.230434	0.250505	0.229213		0.266533			0.290499	0.297397	0.323984			0.331516	0.362649		0.329537			0.345366	0.353284	0.36344				0.400033					0.450257		0.532037				1.11537	1.20917	1.20943		1.06849				1.05252
						0.346964	0.342954	0.329431	0.366241	0.409518	0.498587					0.479277	0.436571		0.389331	0.378091							0.42988								0.489334	0.514707		0.843352	1.20317	1.60729			1.97216		2.12513	2.23198	2.18926	2.19049	2.00781
						2.45291	2.3117	2.3281	2.40213	2.54454	2.06903	2.2921	1.80689	1.85578	1.70617	1.7373	1.62961	1.43077	1.60959	1.57277	1.58859	1.78996	1.89926	1.75192		1.541	1.66418	1.57607	1.2496	1.5499		1.13766		0.958574	1.04694		0.959095	0.868769	0.933747	1.00139	1.10088	0.747882	1.03431	0.742847	0.735542	0.671809	0.730355	0.716143	0.811467
						1.50098	1.49966	1.13351	1.9026	1.56562	1.86206	2.20486	1.87922	2.03178	1.41914	1.76816	1.80485	1.14548	1.44504	1.55918	1.18316	0.984202	1.05869	0.80582	1.29588	0.917691	0.847925	0.89406	0.892652	0.839649	1.0268	0.89765	0.814083	0.832623	0.868361	0.896033	0.74544	0.85453	0.975507	1.02816	1.03659	1.04675	1.08352	1.07943	1.1086	1.08291	1.09386	1.12274
						1.32505	1.11759	0.685606		0.861688	0.864996	0.869355	0.806984	0.963084	1.36699		1.59499	1.81104	1.57233	1.91481	2.25296	2.65178	1.99409	1.86596	1.56271		1.87597	2.96493	2.6633		2.25508	2.58865	2.83709	3.32353		3.77734	2.72659	2.17387					2.31247
							0.360121	0.340722	0.312245	0.3175		0.294559	0.305148											0.308564					0.392523		0.398571	0.406029	0.453259		0.433156	0.442788	0.458455	0.494462		0.694738	0.809854		0.885997	0.897102	0.952136	0.909025	0.904513		0.888684
																										0.404846	0.372273	0.365654			0.380718	0.368861	0.409969	0.402555	0.396407		0.454986	0.620876		0.976578	1.11242					1.25614		1.23966
								0.346315	0.375378	0.351175							0.33198	0.301482		0.266816		0.293628	0.290977		0.34215		0.33942	0.360841	0.376189	0.383363	0.371805		0.365852	0.374527		0.349066	0.428598	0.46567	0.53263	0.631946	0.775199	0.911397	0.968816					1.02379	1.00916
									1.16247	1.11526	1.34773	1.03619	1.09116	1.05556	0.965042	0.943846	0.88734	0.75709	0.745987	0.754908	0.580755	1.07566	0.565884	0.765022	0.754061	0.803606							0.496299	0.465748	0.488261	0.450064	0.521971	0.685537					1.09587			1.30905	1.41818	1.43341	1.45359
											2.24318	2.76649	2.79183	2.8004						0.441489	0.293296	0.265114	0.23249	0.274043	0.316978	0.283311		0.321862			0.319112		0.356585	0.400435	0.392709					0.834143	0.899364	1.02713		1.20503	1.37679	1.30828	1.29631		1.21035
											3.16916	2.62989	2.10131		1.89133			1.13249	0.870138		0.654143	0.66365	0.661069	0.593854				0.579293	0.583325	0.674068	0.577723	0.751157	0.600082	0.69764	0.787149	0.726207	0.79503	0.96252	1.24746	1.38345			1.9201	1.97579	2.10034	2.10237	2.21409	2.24553	2.17269
															1.02889	0.601318	0.46957		0.335216	0.345273	0.319716		0.325012	0.31735						0.381573	0.409637	0.437709		0.450634	0.462393	0.4125			0.830811	0.977623	0.996923	0.967223			0.856237	0.832073	0.924188		0.993298
															0.473171	0.323486	0.311005	0.288494	0.299488	0.296326	0.277165	0.296028		0.275329	0.297724	0.290036	0.292654	0.301109	0.317414	0.321743	0.320167			0.299555	0.296303	0.295109		0.474713	0.641689	0.691982	0.66267		0.708674	0.742502		0.768291	0.740901	0.743159	0.767572
																0.589582	0.607392	0.514738	0.489138	0.402973	0.35747	0.470386	0.403361	0.342042	0.361948	0.447715	0.374869	0.416667	0.46128	0.496734	0.454565	0.526345	0.548804	0.490717	0.549281	0.591133	0.564918	0.689452	0.833642	0.943378	1.04467	1.16025	1.22037	1.29839	1.27267	1.33279	1.39068	1.43681	1.4565
																	0.244137	0.267382	0.245194	0.199773	0.20402		0.212766	0.20366	0.177231		0.191909	0.202689					0.170985				0.23614			0.598101						0.506225		0.468989	0.511034
																		0.383227	0.375234	0.378394	0.382047	0.398562	0.385319	0.381731	0.392905	0.378695	0.368584	0.402767	0.387268	0.420707	0.416769		0.444539	0.466209	0.455997	0.47407		0.771837		1.41083	1.63909	1.71775	1.7297	0.676859	0.84945	0.81098	0.785388	0.804153
																		0.393575	0.435154	0.425069	0.362167	0.378136	0.375849	0.417489		0.429675	0.395435	0.387651	0.408681	0.408264	0.393608	0.395817	0.409346	0.407674	0.41068	0.403809	0.459464	0.639822	0.93975	1.12603		1.28421	1.29152	1.2619	1.20041	1.21785		1.21672	1.18595
																		0.599508	0.4551	0.428905	0.445951		0.431261	0.435676		0.44924	0.43902	0.436208	0.585977	0.468162				0.545369	0.626523		0.765651			1.36447			1.70813					1.45633	1.38976
																		0.70024	0.651172	0.5879	0.571391	0.590169			0.598423		0.591254	0.693833		0.666736	0.655272	0.586687	0.661347	0.677629	0.769204		0.711726	0.82666		1.42252	1.40403	1.45541				1.43384	1.40041	1.38837
																			0.45159	0.517535	0.454064	0.455547	0.486147	0.487826	0.486161	0.532319	0.53684	0.531056	0.54517	0.557014	0.582859	0.544789		0.614307			0.720565	0.863029	1.05841	1.15475	1.31837	1.256	1.33066		1.27025		1.41053	1.36888
																			1.09013	1.14648	1.62851			0.566791	0.591386	0.529052		0.483126	0.754183	1.87481			2.17483						0.845737		1.24926								1.13617
																			0.280168	0.256903	0.241035	0.23593	0.232574	0.233852	0.29305			0.284039	0.271914	0.271362	0.312358			0.305586	0.308756	0.343242	0.383023	0.522101				1.05968		1.18287		1.14624	1.10961		1.0429
																			0.497479	0.480502	0.420112	0.397519	0.372179	0.362985		0.341011	0.41006	0.463282	0.418544		0.446661		0.488464			0.525555	0.590524	0.746649	0.976048	1.25289	1.26362	1.22686	1.23433				1.18055	1.11538
																			0.453084	0.485452	0.486795		0.462154	0.454583		0.482701									0.583714			0.707241				1.26889	1.35988	1.32638	1.35525	1.37757		1.32494
																			0.396568	0.299433	0.298034	0.301913	0.275537			0.244974	0.250956				0.242428	0.243141			0.282061							0.796645	0.779838			0.779706	0.756963	0.769547	0.771488
																				0.312062	0.30262	0.300373	0.281861		0.26229					0.240821					0.263634		0.277392		0.475335	0.64828	0.729499	0.821869		0.922031	0.911514	0.939361		0.858061	0.899553
																				0.465948	0.419984	0.423241				0.487313		0.498011		0.562391	0.628412		0.531348	0.522288	0.64198	0.583876	0.672001	0.901527	1.1078	1.24219	1.43729	1.54289	1.56029	1.55439		1.61292			1.64412
																					0.512465	0.578801	0.448578	0.42297		0.627056	0.479473	0.473183	0.455546	0.496432	0.480573	0.473437	0.460303	0.428442		0.413062	0.450579	0.609272	0.820159	1.01222	1.15316	1.21385	1.11293	1.08966	1.05356	1.05141	1.02325	1.01982
																					0.274495	0.307649	0.29543				0.267999		0.292744		0.338982	0.309182	0.307465		0.319504					0.764305		0.989105	0.978556	1.02073	1.07384	1.10739	1.08277
																					0.373024	0.277582	0.329447	0.317621					0.390542	0.320855	0.334593				0.357954	0.384467
																					0.324976	0.325885	0.287175		0.257857	0.261234	0.243595	0.22427	0.227977	0.225857		0.220165	0.214842	0.211079	0.215523	0.213125	0.246708	0.383797	0.54325	0.617249	0.636507	0.648224	0.618169	0.671588	0.603829	0.688879	0.67893	0.660426	0.676122
																					0.743261	0.640158	0.524574	0.581523	0.612527	0.670169	0.649564	0.515764	0.516952	0.483948	0.488255	0.48297	0.482004	0.487975	0.522072	0.484685	0.589783	0.707395		1.2964	1.49706	1.76424	1.7765	1.86681	1.92397			1.82762	1.76842
																					0.483092	0.5149	0.496006	0.551324	0.553436			0.549575	0.551771		0.634339	0.618248		0.646228		0.642094			1.3184		1.68975	1.76967	1.75284	1.69681			1.59933
																					0.658138	0.553072	0.656441	0.515985			0.517192	0.516442	0.52608	0.54845		0.470165	0.458773	0.461447	0.480702		0.497219		0.697738		0.853089	0.983476	1.14244	1.21839	1.32413	1.44162	1.46504	1.60575	1.59116
																					0.311502	0.251157	0.300523	0.21559	0.199543	0.20847			0.169128	0.1545	0.165659		0.177277	0.167079	0.14021	0.16051	0.200811	0.223061		0.334505	0.323746	0.36901		0.428708	0.415165	0.410593	0.42811
																						0.780912	0.746136	0.701144	0.732425	0.73719	0.584783	0.643401	0.577445	0.634308	0.598456	0.708995	0.536105	0.453573	0.570732		0.695162	0.823139	0.887897	0.928215	0.999809	1.00991	1.04712	0.979717	1.05676	1.06197	1.08705	1.07116	1.10077
																						0.539535	0.438415	0.432393		0.542276	0.539413			0.646329	0.556562	0.650957	0.657363	0.617438	0.679824		0.670194	0.850422	1.03372	1.22349	1.34373	1.32426	1.46554	1.54574	1.57077	1.55746	1.47897	1.36263	1.34785
																						0.413832	0.344479	0.508961	0.356597	0.354196	0.360236	0.361846	0.371003	0.366801	0.381844		0.414093		0.41126	0.388199	0.433561	0.585827	0.783092	0.969509	1.06024	1.0399	1.02155	0.953624	0.938681	0.930824
																						0.296017	0.292557	0.288395	0.260625	0.261464	0.25516	0.247424	0.262992	0.267421			0.28889	0.297787		0.269904		0.399337					0.674615	0.672695		0.652045	0.667197	0.644639	0.659263
																							0.419367	0.504163	0.357036	0.334507	0.366851	0.36852	0.351321		0.355716	0.354759		0.333607	0.326998	0.327197	0.373987	0.444897	0.527513
																							0.483606	0.467096	0.497883	0.591421	0.62726	0.551825	0.558816	0.537934		0.489227	0.480405	0.492221	0.496129	0.500628	0.570065	0.698181	0.851232		1.23336	1.41103	1.60175	1.63489		1.69451	1.59226	1.55156
																							0.373758	0.39504	0.388961				0.345691	0.322983	0.350425	0.387025	0.343446			0.344494	0.377142		0.641377	0.814076			0.918956					0.884036
																							0.515321	0.513325	0.505246	0.553709	0.552099	0.56959		0.585106	0.557281	0.607504	0.61069	0.644298	0.63488	0.691312	0.716324		1.42158		1.90945	2.0516	2.10869	2.09865	2.21602			2.15649
																							0.970437	0.857037	0.854989	0.806336		0.787636			0.719633		0.676762		0.660025	0.752479		0.905405	1.45707	1.65822		1.99176	1.95146	2.10236		1.85543	1.81968
																							0.85526	0.752343	0.745403				0.695977	0.693863	0.695256	0.64924	0.635799	0.6271			0.627961	0.824077	1.09667	1.34975		1.66159		1.56662	1.56476			1.40979	1.2991
																								0.56312	0.671709	0.460831		0.526253	0.489825	0.473925		0.564444	0.568056	0.614349		0.672879	0.598572	0.749239	0.954497	1.16324	1.28229	1.36018	1.43576	1.42682	1.39512	1.34116	1.25997	1.2316	1.19331
																								0.375506	0.334111	0.305934			0.335817	0.816309	0.421194	0.312505	0.388606	0.312003	0.380432	0.377475	0.572447	0.601774	0.814062	0.514587	0.592147		0.811536	0.818162	0.722172	1.90731	0.761879	0.785971	2.07978
																								0.360701	0.458797	0.39999	0.372922	0.384048	0.377303	0.411584		0.432184	0.413072	0.445563		0.468877		0.527857	0.727403	0.915708	1.03374	1.06047	0.99804	1.011	0.996168	1.00167	1.03233	1.07514	1.09358
																								0.245427	0.22666	0.291922	0.257744	0.324037	0.295789	0.328044					0.358742		0.33851	0.425847		0.696496	0.842526	0.889877		0.95466			1.0171		1.13956
																								0.582717	0.59728	0.595306	0.62734	0.656781	0.676732	0.632966	0.610342	0.573789		0.612782	0.716763	0.63802	0.718833		0.882237	0.954991	0.903224	1.033	1.11185	1.06833		1.13757			1.18312
																									0.418463	0.308959	0.387834	0.285847		0.340235	0.317744	0.288064	0.295685	0.294369	0.318691	0.316768	0.372303	0.434734	0.58008	0.691266		0.861456		1.227	0.863884	0.85821	0.836218	0.862486	0.854034
																									0.251685	0.319553	0.253946	0.283799		0.281286	0.289615	0.341872	0.273197	0.299694		0.327495	0.370211	0.441116	0.601136	0.598572	0.618774	0.679735	0.65172	0.590395	0.657576	0.626963	0.641495	0.691501	0.593565
																									0.511437	0.460555	0.525151		0.461443	0.471557	0.485045	0.501778	0.498792	0.507371	0.513141	0.530724	0.584175		0.984511	1.18923	1.27186		1.20241	1.15263	1.06596	1.0806	1.03836	1.02471	1.09198
																									0.534542	0.541694	0.528918	0.517113	0.672492	0.603902	0.570433	0.54478	0.595643	0.561631	0.661665	0.637501	0.689191	0.776915	1.07545	1.07693	1.27887	1.1538	1.10541	1.12766	1.25916	1.25874	1.31478	1.25863	1.27352
																									0.762362	0.792043	0.772879	0.737104	0.71306	0.722455		0.849058	0.630611	0.586448		0.599849		0.933301	1.19758			1.34572	1.29683	1.18582		1.13314			1.00245
																									1.69119	1.91523	0.992261	0.796314	1.14934	1.38123	0.898617	1.28649	0.824377	0.761321	0.814122	0.904866	0.956123	1.06719	1.0401	1.11437	1.23753	1.19495	1.34584	1.32174	1.06813	1.20454	1.22653	1.27712	1.12783
																									0.517309	0.522316	0.54881	0.476586	0.480528	0.516723	0.512383		0.556436		0.565093		0.65323	0.795078		1.28826	1.15744		1.47895			1.43586	1.37498	1.4604	1.67626
																										1.28473	0.772464	0.957804		0.71418	0.873268	0.688623		0.588321	0.641843	0.596646	0.628384	0.785639		0.988144	0.972721	0.995856	1.1672	1.2557	1.29865	1.30144	1.26914	1.25275	1.25996
																										0.425724	0.411836	0.447196	0.473173	0.398285	0.450726	0.512465	0.4449	0.424664	0.432166	0.430495	0.369704	0.429087	0.598114	0.652394	0.679086	0.800059	0.773068	0.809855	0.808034	0.817468	0.784944	0.760829	0.761978
																										0.294077	0.284007	0.2816	0.291416		0.277717	0.306265	0.332372	0.332242	0.337635	0.338564	0.38853	0.542496	0.792528			1.24277		1.42704		1.4668	1.41074	1.46188
																										0.722916	0.750485	0.738215		0.71807		0.710608	0.691465	0.826213	0.805801	0.620646	0.822979	0.885527	0.921343	1.01263			1.18723	1.50622	1.1847	1.58282			1.85821
																										0.407763	0.409518	0.340911	0.338949	0.336466			0.332408	0.334758		0.278579			0.509593	0.564013	0.649199			0.965844	0.984572	1.08535	1.04674	1.07006	1.0096
																											0.609617	0.551837	0.560107			0.645258	0.651918	0.732236	0.689478		0.627744	0.78451	1.14079	1.31818	1.48246	1.41223	1.34271	1.31822	1.38853	1.38255	1.42546	1.45181	1.44003
																											0.550242	0.589904	0.557172									1.26961			2.22946	1.84023
[truncated: 233 more rows]
[truncated: 154 more columns]

## Sheet: tfeb Con_100Ins0xGluc
TFEBTR_TOP; cells cultured with 100ng/mL Ins 0xGluc; sampling time: 7.5 min; data are cells-by-time
[truncated: 2,042 more rows]
[truncated: 154 more columns]

[truncated: 4 more sheets: tfeb Con_10000Ins0xGluc, tfeb Con_0xEAA0xGluc, tfeb Con_0_01xEAA0xGluc, tfeb Con_0_5xEAA0xGluc]
