# Supplementary material for: Continuous sensing of nutrients and growth factors by the mTORC1-TFEB axis
Source: eLife. 2023 Sep 12;12:e74903. doi: 10.7554/eLife.74903 (PMC10547473; doi:10.7554/eLife.74903)
Supplement: Figure 5—source data 2. [file elife-74903-fig5-data2.xlsx]

## Sheet: tfeb Con_0Ins1xGluc
TFEBTR_TOP; cells cultured with 0ng/mL Ins 1xGluc; sampling time: 7.5 min; data are cells-by-time
Treated with: 0xEAA
Replicate 1, Treated at time point 17
0.575475	0.603126	0.600141	0.59501	0.60077	0.629576	0.61089	0.573963	0.581797	0.579329	0.630828	0.622903	0.640365	0.605458	0.609338	0.604652	0.608855	0.619243	0.619276	0.609734	0.645903	0.606434	0.651002	0.640882	0.632051	0.621036	0.609244	0.590105	0.596145	0.591066	0.578458	0.576969	0.570243	0.575572	0.5901	0.574365	0.584269	0.608667	0.618788	0.617856	0.618154	0.620711	0.606282	0.608591	0.621552	0.619346	0.640864	0.630763	0.611347	0.615861
1.3409	1.28544	1.33348	1.21318	1.34352	1.27664	1.29634	1.24426	1.31363	1.25126	1.26265	1.19989	1.09304	1.17161	1.19436	1.15176	1.10008	1.10931	1.08967	1.09558	1.03781	1.07971	1.04609	1.0308	1.27507	1.08288	1.01373	1.05535	1.26023	1.16923	1.22494	1.17804	1.28689	1.39462	1.31941	1.25906	1.23384	1.28743	1.15846	1.17424	1.21062	1.24786	1.34709	1.33958	1.33481	1.14238	1.33639	1.45371	1.13443	1.4903
0.536419	0.565295	0.546247	0.562137	0.604547	0.581938	0.621688	0.551855	0.559271	0.53234	0.507544	0.472499	0.451445	0.462221	0.449911	0.428517	0.45077	0.449907	0.436884	0.494045	0.509058	0.519327	0.534964	0.554879	0.564464	0.565924	0.556885	0.564713	0.529881	0.49759	0.498025	0.479658	0.46943	0.439804	0.411514	0.393582	0.39098	0.430747	0.468827	0.523617	0.492932	0.510456	0.51113	0.529812	0.526586	0.514025	0.560064	0.569131	0.514899	0.559014
1.02722	1.03054	0.952259	0.93617	0.933965	0.940585	0.920042	0.978689	0.995123	1.04059	1.0608	1.1332	1.14394	1.14134	1.10382	1.23644	1.25089	1.18879	1.19454	1.20577	1.19761	1.20731	1.19182	1.22561	1.19238	1.32144	1.3398	1.35006	1.4212	1.40842	1.43089	1.43789	1.43979	1.41123	1.40968	1.36263	1.359	1.41716	1.39206	1.38217	1.44489	1.40491	1.38439	1.31692	1.27784	1.25791	1.25662	1.26407	1.29455	1.31378
0.721275	0.69672	0.719017	0.679676	0.646243	0.67106	0.658697	0.616184	0.619161	0.586061	0.605698	0.599885	0.591894	0.640163	0.64236	0.68392	0.685342	0.740627	0.713392	0.750125	0.802221	0.797659	0.880207	0.89772	0.897535	0.929928	0.978117	1.02492	1.07967	1.09805	1.17447	1.1996	1.22181	1.21671	1.21525	1.2146	1.22095	1.21956	1.27889	1.31466	1.32604	1.35413	1.38068	1.36655	1.45597	1.46177	1.46165	1.46481	1.44074	1.44354
1.11571	1.17643	1.11218	1.17286	1.14395	1.03131	1.03948	1.04469	0.9962	0.972774	0.934975	0.899538	0.898876	0.888098	0.83897	0.825797	0.8193	0.809614	0.841315	0.884892	0.829645	0.827953	0.817822	0.860844	0.831501	0.804633	0.835712	0.814723	0.84181	0.835909	0.849119	0.868203	0.870108	0.905307	0.90986	0.889539	0.887555	0.883895	0.887345	0.88284	0.916706	0.949236	0.903842	0.863784	0.913139	0.897795	0.952656	0.889628	0.905649	0.906363
0.548243	0.544378	0.569963	0.539218	0.55824	0.581853	0.594867	0.590333	0.614453	0.593404	0.518127	0.583896	0.547165	0.548972	0.583397	0.599476	0.654276	0.691737	0.724695	0.726816	0.683952	0.6853	0.761403	0.753649	0.758064	0.735684	0.763143	0.776814	0.806843	0.810128	0.825833	0.808358	0.840267	0.816028	0.861358	0.862341	0.856672	0.887646	0.949174	0.934157	0.980103	1.07925	1.06684	1.07253	1.05662	1.05746	1.08678	1.06065	1.00003	1.03803
0.717211	0.704646	0.727037	0.737072	0.684524	0.698444	0.643055	0.647547	0.649315	0.652605	0.652955	0.662177	0.674805	0.72145	0.72367	0.726807	0.730659	0.733999	0.747568	0.745557	0.734541	0.716733	0.721594	0.72632	0.715144	0.774246	0.784895	0.813229	0.849854	0.857356	0.867495	0.890177	0.911987	0.895282	0.936074	0.922571	0.939665	0.961897	0.953506	0.968282	0.939782	0.942393	0.944116	0.972295	0.940351	0.991042	0.95532	0.972795	0.970776	0.988372
0.651034	0.616029	0.584204	0.611896	0.629795	0.643828	0.656503	0.682534	0.720884	0.709137	0.710879	0.753253	0.765766	0.756555	0.749314	0.752498	0.78807	0.777531	0.761537	0.823876	0.86019	0.874126	0.923847	0.925686	0.955899	0.931026	0.971894	1.02042	1.0143	0.963093	1.04708	1.06493	1.03343	1.05583	1.0469	1.04939	0.993559	1.04832	1.02889	1.06572	1.08062	1.09247	1.07317	1.05727	1.04711	1.05645	1.05445	1.0647	1.09316	1.10278
0.583117	0.640214	0.616703	0.612457	0.641061	0.679668	0.719474	0.782002	0.820183	0.823937	0.864472	0.856718	0.911499	0.946803	0.956636	0.959135	0.932419	0.949023	0.920345	0.90682	0.862754	0.835157	0.836568	0.807991	0.811078	0.845097	0.840485	0.812965	0.80955	0.828771	0.815402	0.808091	0.803696	0.795294	0.78517	0.789345	0.788345	0.806381	0.7932	0.776795	0.801945	0.791403	0.790158	0.782487	0.814867	0.821301	0.819819	0.857453	0.841736	0.874946
0.924052	0.942381	0.960757	0.804463	0.881179	0.92434	0.909748	0.856156	0.947046	0.863614	0.62197	0.811877	0.682027	0.992713	0.855322	0.92136	0.622385	0.835944	0.94817	0.845426	0.794193	0.833256	0.920451	0.658303	0.956279	0.829643	0.896293	0.941928	0.837564	1.03363	0.651458	0.974202	0.810476	0.870105	0.907963	0.60819	0.769911	0.830463	0.877802	0.58628	0.835624	0.610447	0.596495	0.662459	0.635708	0.60722	0.607698	0.843069	0.587987	0.722999
0.889056	0.870008	0.820174	0.797018	0.754394	0.733038	0.777864	0.775455	0.80849	0.789762	0.813794	0.847938	0.846088	0.91333	0.926232	0.985961	0.935427	0.950531	0.906557	0.973521	0.938131	0.900759	0.933953	0.934803	0.968283	0.97392	0.946565	0.926798	0.945648	0.969138	0.95991	0.966206	0.925193	0.960679	0.920287	0.901003	0.905559	0.923479	0.912612	0.86426	0.853767	0.833781	0.746398	0.695612	0.643548	0.615229	0.589259	0.612081	0.619951	0.644997
0.85797	0.879089	0.91207	0.884808	0.905808	0.905005	0.871333	0.875241	0.892577	0.868341	0.894262	0.896299	0.948928	0.9289	0.930058	0.961388	0.929741	0.903895	0.919183	0.872743	0.837428	0.812932	0.821978	0.838683	0.854483	0.855621	0.90414	0.884928	0.902058	0.937693	0.983385	1.00391	1.03791	1.07913	1.09141	1.14028	1.17829	1.1342	1.21183	1.28693	1.30417	1.34456	1.42856	1.44637	1.50861	1.53025	1.53614	1.50651	1.54658	1.50703
1.36701	1.35118	1.19184	1.22996	1.26372	1.11724	1.09774	1.19027	1.17845	1.14592	1.18569	1.22365	1.12146	1.10887	1.14925	1.05837	1.06503	1.05816	1.05571	1.06618	1.03818	1.05787	1.10391	1.16841	1.15253	1.18932	1.23457	1.14699	1.19908	1.25409	1.30044	1.25419	1.16445	1.06402	0.987608	0.965575	0.982392	1.08353	1.0119	1.13372	1.06004	1.18767	1.21997	1.12903	1.15716	1.15743	1.2225	1.31221	1.46263	1.42732
1.0161	1.12937	0.989514	0.969119	1.02417	1.01658	1.00842	1.03219	1.01577	1.0659	1.12169	1.12184	0.973604	1.09137	0.95841	0.882845	1.03233	1.04445	0.860659	0.797921	0.964027	0.97737	0.925339	0.884659	0.879226	0.977161	0.948497	0.976857	1.02751	1.07985	1.13895	1.13332	1.09532	1.10599	1.10858	1.17309	1.11037	1.11356	1.079	1.06071	0.990199	1.02242	1.01181	0.995976	0.936096	0.943031	0.967333	0.95139	0.876631	0.948154
0.831162	0.819976	0.840652	0.804835	0.74428	0.6861	0.676125	0.667812	0.682291	0.715176	0.711684	0.708723	0.70237	0.697745	0.729795	0.718522	0.761997	0.791141	0.8161	0.851139	0.902736	0.952831	0.951333	0.995202	1.03922	1.07106	1.12792	1.15561	1.15285	1.13384	1.06766	0.994775	0.916586	0.885145	0.865455	0.842197	0.793029	0.829504	0.830682	0.895448	0.95034	0.97307	0.995494	1.01514	1.0831	1.18238	1.30274	1.33403	1.38016	1.36857
1.15003	1.14001	1.05772	1.04782	1.11078	1.04408	1.05253	0.992902	1.05266	1.05282	1.05998	1.16122	1.08532	1.21648	1.24272	1.28795	1.34246	1.27026	1.27117	1.19096	1.22623	1.23359	1.27167	1.24862	1.28653	1.30267	1.34463	1.29412	1.30845	1.36033	1.39451	1.40956	1.40128	1.44588	1.45176	1.48214	1.48783	1.52702	1.54257	1.64883	1.58895	1.62712	1.54028	1.66943	1.65897	1.66956	1.65852	1.66384	1.58361	1.55419
0.825959	0.96997	0.821843	0.878477	0.838029	0.784562	0.794098	0.882164	0.837773	0.892123	0.860812	0.83492	0.859052	0.944746	1.07853	0.841801	0.867695	0.891743	0.905693	0.89615	0.88786	0.918459	0.935581	1.00257	1.00451	1.0107	1.03014	1.00528	0.984955	0.97992	0.990967	1.01045	0.977211	0.989637	1.06635	0.999986	1.1054	1.10819	1.12598	1.1551	1.20886	1.26249	1.24991	1.33031	1.37142	1.40553	1.47096	1.4127	1.43043	1.29638
0.545816	0.525889	0.535446	0.513231	0.510287	0.514543	0.526318	0.538216	0.532093	0.539548	0.567227	0.590217	0.580707	0.615068	0.638244	0.635959	0.655678	0.695267	0.680743	0.675445	0.687386	0.690977	0.657839	0.667625	0.640876	0.627907	0.672719	0.661399	0.692657	0.669927	0.679341	0.698471	0.735885	0.741127	0.761703	0.800729	0.776001	0.846542	0.855014	0.838908	0.808439	0.812461	0.827773	0.866387	0.827368	0.83882	0.828416	0.80353	0.791913	0.750671
0.783808	0.767505	0.774339	0.748147	0.7431	0.697045	0.677636	0.654115	0.633574	0.620773	0.599482	0.595517	0.603385	0.603319	0.61302	0.608176	0.618994	0.601041	0.59406	0.615835	0.617334	0.615007	0.654186	0.729572	1.15835	0.755725	0.394114	0.404575	0.353986	0.433971	0.408472	0.440599		0.455969	0.494879	0.554886	0.556249	0.613776	0.616836	0.654186	0.667091	0.630832	0.640727	0.630809	0.677523	0.682486	0.731428	0.773392	0.799264	0.837928
1.08965	1.16324	1.12252	1.24245	1.25982	1.2687	1.07098	1.1383	1.4993	1.19123	1.42673	1.47504	1.39883	1.38287	1.78757	1.7676	1.72917	1.50547	1.4642	1.61595	1.45088	1.40001	1.31028	1.37226	1.3792	1.29123	1.44214	1.396	1.1124	1.35167	1.30416	1.2958	1.39656	1.31695	1.28653	1.13824	1.10993	1.10802	1.21382	1.20696	1.31117	1.32983	1.25238	1.24353	1.28614	1.36114	1.31891	1.39235	1.36102	1.36721
0.723947	0.706367	0.727396	0.698647	0.711486	0.729393	0.698032	0.665654	0.74703	0.764428	0.750159	0.739517	0.824846	0.863176	0.954409	1.00623	0.904044	0.981661	0.953459	0.943014	0.869489	0.874662	0.810491	0.790011	0.769693	0.717929	0.688254	0.684873	0.719448	0.7201	0.716018	0.724092	0.711847	0.721509	0.697133	0.770118	0.74902	0.830096	0.837556	0.857632	0.859555	0.898369	0.871428	0.885674	0.898734	0.830678	0.850355	0.902985	0.874328	0.871132
0.730799	0.748574	0.736818	0.715461	0.657625	0.678112	0.681215	0.672097	0.682181	0.696328	0.628616	0.695796	0.701399	0.689422	0.686196	0.670503	0.687983	0.70188	0.676645	0.695605	0.663639	0.656306	0.62164	0.623528	0.62949	0.651306	0.681804	0.71274	0.750782	0.758902	0.794206	0.809961	0.804554	0.825543	0.84959	0.855463	0.848026	0.831072	0.804186	0.774756	0.746036	0.747603	0.753788	0.722406	0.753134	0.719778	0.717071	0.745862	0.776238	0.755182
1.51524	1.54942	1.53857	1.40807	1.33273	1.3741	1.38278	1.29527	1.34069	1.35087	1.47494	1.42799	1.47873	1.50244	1.58446	1.60456	1.67376	1.67843	1.76144	1.72863	1.69865	1.75744	1.75612	1.91293	1.93774	1.84259	1.95182	1.86988	1.9497	1.89763	1.76388	1.92013	1.88643	1.94803	1.90218	1.96392	1.98068	2.01203	1.94377	2.00514	1.95448	1.97921	1.99894	2.05997	1.94366	1.99197	2.03331	2.06603	2.03355	2.15662
1.80357	1.83552	1.69462	1.80078	1.62623	1.63253	1.5947	1.29889	1.33259	1.52669	1.63874	1.58627	1.38025	1.39813	1.26051	1.39112	1.00765	1.12594	1.05892	1.04787	1.10007	1.1038	1.0544	1.2654	1.05734	1.0892	1.0806	1.14038	1.10366	1.03851	1.04488	1.17819	1.15992	1.09481	1.18267	1.26228	1.27661	1.13605	1.07313	1.15676	1.27512	1.46788	1.95492	1.84048	1.96768	1.94483	1.74374	1.85042	2.38154	1.94465
1.19519	1.67206	1.78156	2.21238	2.07032	2.05179	1.88017	1.94876	1.09523	2.07832	1.82794	1.35685	1.32523	1.86758	2.72137	3.00651	2.59411	1.41984	1.29171	1.29349	1.30322	1.44226	1.22115	1.31548	1.35286	1.30476	1.3268	1.35751	1.45037	1.47918	1.42234	1.39735	1.36101	1.36138	1.43157	1.32105	1.45389	1.30389	1.44998	1.36827	1.33183	1.4194	1.38545	1.38373	1.5034	1.44119	1.53241	1.52371	1.47074	1.53609
1.09225	1.29646	1.24139	1.42863	1.8268	1.79837	1.92023	1.82942	1.55552	2.13224	1.87223	2.18562	1.78305	2.31205	2.30282	1.64424	1.68746	1.77079	1.42929	1.36375	1.55097	1.2803	1.25276	1.23959	1.1973	1.30138	1.34177	1.29769	1.31293	1.29468	1.26991	1.27831	1.24005	1.25693	1.28234	1.30094	1.33875	1.27356	1.3651	1.43817	1.46845	1.61308	2.03527	1.94801	1.7484	1.53754	1.48137	1.55018	1.52681	1.5505
0.858375	0.862748	0.949101	1.01586	0.98279	1.01877	1.02748	1.069	1.1056	1.12071	1.06587	1.07196	1.10833	1.1722	1.1495	1.14023	1.12088	1.04523	0.999352	1.0356	0.992688	0.942773	0.92231	1.00226	0.954704	0.99954	1.06579	1.05223	1.03963	1.04854	0.980339	1.00098	0.931108	0.922341	0.924724	0.963264	0.96094	0.926907	0.935048	0.949405	0.979043	1.0095	1.02212	1.06555	1.03615	1.02237	1.0649	1.07315	1.15494	1.20208
0.601132	0.625546	0.636541	0.666063	0.669621	0.672632	0.678388	0.668856	0.702295	0.715794	0.747263	0.738756	0.749076	0.749687	0.761926	0.774652	0.778783	0.804788	0.840009	0.853865	0.828292	0.786596	0.843734	0.857891	0.871011	0.884363	0.898699	0.901802	0.873398	0.870434	0.942746	0.962266	0.924664	0.936212	0.950221	0.956711	0.933639	0.952004	0.948108	0.940224	0.939378	0.974004	0.988929	0.986234	1.03489	1.04151	1.09372	1.04188	1.0688	1.10051
0.49574	0.516966	0.50565	0.510204	0.499234	0.453742	0.499577	0.491864	0.41826	0.556397	0.552683	0.567134	0.443851	0.445571	0.444294	0.644608	0.503487	0.513588	0.520323	0.509652	0.495731	0.580001	0.580186	0.589003	0.568323	0.636511	0.622896	0.619836	0.633569	0.634806	0.625164	0.536989	0.565348	0.562791	0.578326	0.552138	0.596466	0.583082	0.60981	0.639638	0.633592	0.685533	0.648386	0.659155	0.713283	0.776755	0.777543	0.87619	0.924822	0.91273
1.13733	1.1643	1.23499	1.07541	1.15922	1.15032	1.10535	1.15368	1.09231	1.07829	1.14748	1.11811	1.22639	1.12763	1.067	0.981298	1.02529	0.972171	0.923589	0.976471	0.96029	0.93963	0.971671	0.947073	0.979252	0.969533	0.946445	0.969291	0.947786	0.95582	0.956618	0.925139	0.995983	0.938937	0.95234	0.936351	0.985306	0.981076	0.890558	0.894744	0.934377	0.929296	0.940431	0.939315	0.975246	0.925591	0.91285	0.903946	0.890679	0.905447
0.357169	0.366554	0.337967	0.376152	0.425134	0.415239	0.44857	0.44554	0.446356	0.444274	0.455314	0.478596	0.495786	0.493465	0.519175	0.528488	0.562391	0.57412	0.612493	0.624754	0.649302	0.647281	0.652752	0.636345	0.676841	0.663392	0.701962	0.740897	0.742272	0.813305	0.799377	0.824727	0.86023	0.875508	0.89292	0.909425	0.973803	0.987943	1.00096	1.02582	1.04474	1.04345	1.08376	1.09248	1.08953	1.11713	1.07812	1.09144	1.12971	1.19412
1.05097	1.02015	0.921563	1.04765	0.980694	0.90885	0.892697	1.04598	1.00403	1.02895	1.05525	1.04829	0.915634	0.874868	0.938693	1.04628	0.9932	1.05893	1.01376	1.00416	1.04956	1.09913	1.06245	1.09205	0.956118	1.0352	1.07299	1.12805	1.04949	1.03595	1.05929	1.08775	1.04412	1.13666	1.0069	1.01629	1.0589	1.0131	1.03826	1.03051	1.04352	1.05522	1.05058	0.993645	1.01812	0.936997	1.04673	1.05293	1.09153	1.0381
1.22034	1.09617	1.09259	1.1242	1.13177	0.971493	1.03916	1.12906	0.890772	0.980526	1.02465	1.02277	1.00589	0.972819	1.08233	1.0119	1.06008	0.937657	0.981794	0.914977	0.893628	1.00929	0.937557	0.938681	1.04709	0.955766	0.956943	0.969958	0.928928	0.952188	0.966723	0.896772	0.88831	0.910627	0.89137	0.85898	0.889851	0.858785	0.8218	0.90529	0.837944	0.799315	0.931484	0.874366	0.888077	0.827615	0.834272	0.794138	0.892342	0.798374
1.0825	1.33341	1.24611	1.22287	1.33477	1.4182	1.18643	1.21061	1.39868	1.35537	1.3422	1.31393	1.19629	1.09282	1.14776	1.03268	1.11724	1.02156	1.03261	1.11049	1.00634	1.05109	1.10413	0.994106	0.950909	0.974387	1.05746	1.09505	1.12867	0.963384	1.02212	1.08973	1.14313	1.12688	1.16944	1.14287	1.19265	1.0948	1.18235	1.11841	0.99624	1.06862	0.992293	0.997918	1.03536	1.06675	1.04537	1.05922	1.08038	1.05757
0.586491	0.56081	0.562462	0.56582	0.543859	0.515064	0.540174	0.554051	0.538148	0.543384	0.534667	0.543179	0.529493	0.52043	0.47083	0.476613	0.456108	0.469946	0.508734	0.517392	0.515466	0.521093	0.531254	0.536645	0.511456	0.519867	0.52089	0.525435	0.544727	0.50293	0.490976	0.515908	0.528862	0.535384	0.533672	0.569451	0.558656	0.58215	0.584712	0.573474	0.582951	0.590806	0.557012	0.558097	0.572457	0.604948	0.597162	0.621405	0.640729	0.683802
1.01888	1.1165	0.948351	1.02478	1.02564	1.01532	0.828316	0.912648	0.893717	0.9193	1.0129	1.00997		1.07988	1.04277	1.07517	1.05573		1.02377	0.972265	0.937911	0.902093	0.867329	0.858638	0.831103	0.829578	0.781823	0.765299	0.709239	0.706304	0.683289	0.665695	0.67258	0.663268	0.715083	0.789477	0.764313	0.764738	0.702683	0.667269	0.674466	0.683617	0.662651	0.708064	0.6672	0.689375	0.685649	0.711078	0.70592	0.713211
0.947197	0.898394	0.994003	1.03382	0.939422	0.981762	1.00122	0.871825	1.06225	0.823848	0.911753	0.746743	0.823012	0.861473	0.959903	0.851254	0.928846	0.859173	0.870876	0.857609	0.874456	0.857339	0.876016	0.838151	0.907008	0.913028	0.872132	0.930778	0.876804	0.848062	0.880471	0.920772	0.944012	0.854747	0.909509	0.977224	0.894602	0.920963	0.904651	0.926013	0.88924	0.833614	0.952661	1.08255	0.952284	0.986729	0.884548	1.06001	0.906915	0.992869
1.00114	1.01235	0.994978	0.862383			0.73376	0.780821	2.58263		2.49714	2.41614	2.47517	2.35517	2.21975	2.1552	2.04887	2.02946	1.91885	1.77836	1.68448	1.77528	1.69095	1.60509	1.57039	1.66571	1.59036	1.5766	1.50939	1.50142	1.49732	1.4721	1.35588	1.48434	1.46429	1.49188	1.60071	1.60175	1.60694	1.62465	1.71363	1.61548	1.63535	1.62568	1.59989	1.834	1.88679	1.7898	1.77346	1.88295
0.521938	0.594396	0.522992			0.685709	0.765228		0.782063	0.748589	0.735357	0.840903	0.771182	0.78519	0.824486	0.849122	0.792524	0.815068	0.865992	0.878251	0.867374	0.906635	0.871994	0.860786	0.874531	0.877817	0.898867	0.894336	0.850504	0.844152	0.858046	0.851947	0.84208	0.788883	0.771304	0.778217	0.844495	0.859803	0.877828	0.853913	0.833502	0.899741	0.940191	0.911704	1.02451	1.04322	1.06068	1.02064	1.04918	1.03983
1.66997	1.16838	2.54048	0.675606	0.656254	0.665869	0.655112	0.838212	0.717587	0.758411	0.850197	0.845645	0.740395	0.867609	0.885178	0.858195	0.744353	0.795341	0.914624	0.82959	0.889246	0.95943	0.7212	0.866504	0.772401	0.757791	0.704647	0.723626	0.59706	0.729545	0.612663	0.690968	0.775035			0.653566			0.689983		0.714276	0.610605	0.696066	0.75477	0.796472		0.664359	0.628914	0.778528	0.85673
1.08725	0.975099	1.25464	1.05559	1.02403	1.35083	1.03549	1.21498	1.02531	1.02938	1.08422	1.22123	1.02648	0.894205	1.11568	1.09288	1.04026	1.01375	0.949992	1.03866	1.005	0.986739	1.02211	0.950468	1.01775	0.930052	0.935587	0.9978		0.982972	1.23234	1.57785	1.03093			0.962827	0.848475	0.779374	0.760374	0.759387	0.888863		0.787693	0.800171	0.875742	0.889259	0.7712	0.835899	0.815537	0.790936
1.02041	0.9554	0.911712	0.909417	0.94527	1.02487	0.981007		0.910339	1.08484	0.819352	0.957688	0.964839	1.12176	0.864292	0.867712	0.853737	0.937199	0.878206	1.22897	0.906816		0.811073	0.886587	0.87158	0.794475		0.832131	1.01162	0.920174	0.83423		0.968394	0.895009	0.858574	0.90687	0.75936	0.861256	0.921331	0.851815	0.890908		0.799072	0.889917	0.899385	1.01076		0.956744
	0.981005	0.940469	1.00738	1.006	0.999077	0.997502	0.901411	0.94179	0.917126	0.935697	0.905555	0.855685	0.962878	0.865598	0.89477	1.05826	1.1586	1.06976	0.932892	0.952243	0.977877	0.94249	0.924441	0.942331	0.876495	0.879651	0.786444	0.797256	0.8205	0.865833	0.809887	0.801159	0.793436	0.794576	0.815237	0.726816	0.796611	0.778529	0.726343	0.808951	0.79146	0.764281	0.774289	0.644464	0.741189	0.724156	0.751823	0.732603	0.717555
1.22157	1.45993	1.14775	1.16208	0.887287	1.00795	1.14841	1.07962	1.03308	0.990668	1.08485	0.959302	1.22065	1.0682	1.16998	0.99673	0.997229	1.10253	1.03999	1.04671	1.21255	1.32413	1.26382	1.15212	1.04098	0.927668	0.892786	0.796757	0.9592	0.951431	1.04187	0.867642	0.919584	0.863095	0.778429	0.874295	0.977881	1.15063	1.06403	1.00535	1.30511	1.27365	1.3408	1.13717	1.20545	1.26422	1.1566	1.16033	1.18024	1.0805
1.04212	1.01034	1.00246	0.953749	0.864808	0.88496	0.984994	0.929341	0.989306	0.940878	1.04558	1.05576	1.10677	1.16328	1.08277	1.06455	1.04044	1.05016	1.08685	1.11354	1.05791	1.0688	0.999795	1.03601	0.960352	0.91905	0.954141	1.09625	1.03114	0.988899	0.991986	0.898907	0.901702	0.993245	0.969348	0.917381	0.941247	0.871819	1.07366	0.914128	0.927914	1.03275	1.03555	1.02519	0.951486	0.884343	0.946542	0.859878	0.880689	0.930333
1.31128	2.65789	2.26754	1.79772	1.2109	1.21906	0.92651	0.739463	0.766697	0.761462	0.758539	0.727561	0.664293	0.84506	0.610603	0.63545	0.621678	0.663903	0.655496	0.889598	0.911172	1.0845	0.742946	0.897701	0.982917	0.826318	1.00528	0.953132	0.769333	0.893216	0.897688	0.858593	0.735006	0.706824	0.795796	0.881157	0.826221	0.84571	0.88882	0.900372	0.903058	0.863568	0.814166	0.767691	0.790894	0.795234
	0.915179		0.863005				0.954298		1.01627	1.05462	1.08056	1.08274		1.07724	1.0476	1.02758	0.969246	0.947866	0.971373	0.985925	0.994787	1.02331	1.05026	1.06578	1.12481	1.16177	1.20988	1.28729	1.33779	1.30643	1.27329	1.16461	1.24948	1.13976	0.69031	0.651931		0.349137	0.725988	0.663677	0.785023	1.0905	1.28301	1.20334	1.18608	1.12774	1.04813	1.07345	1.10061
	0.86416	0.82657	0.814334	0.795389	0.745273	0.727624	0.682879	0.607415	0.59636	0.641552	0.588866	0.615838	0.607504	0.618755	0.673268	0.626588	0.68477	0.703757	0.695244	0.740954	0.752068	0.75799	0.750448	0.792008	0.793101	0.863609	0.822648	0.791259	0.787313	0.799155	0.791553	0.840293	0.808709	0.887493	0.925665	1.02936	1.01857	1.12354	1.16738	1.14396	1.17929	1.21576	1.19754	1.18416	1.12205	1.19639	1.19527	1.22243	1.24471
	1.00005	0.979389	0.964936	0.917523	0.889144	0.850092	0.869348	0.914905	0.905931	0.963044	0.944815	0.914169	0.949063	0.92355	0.866863	0.875813	0.833078	0.798851	0.800056	0.747666	0.752171	0.859809	0.85421	0.887091	0.942619	1.03298	1.05396	1.03296	1.13179	1.1562	1.245	1.31685	1.52653	1.49917	1.48178	1.43289	1.46078	1.36447	1.40865	1.31068	1.22471	1.21904	1.21333	1.23711	1.24346	1.28144	1.24059	1.23717	1.21259
	0.860724	0.892068	0.95137	0.864882	0.915306	0.906143	0.818037	0.945651	0.940626	0.984548	0.960289	1.00566	1.05144	1.00446	1.09049	1.0655	1.03222	1.02441	0.925458	0.981861	0.949389	1.02653	1.0534	1.0166	1.02991	1.08427	1.06159	1.06938	1.07739	0.958808	0.976801	0.9889	1.02474	1.01214	1.04553	1.0603	1.12534	1.13765	1.13995	1.16951	1.14527	1.07726	1.12578	1.15968	1.11969	1.12046	1.11636	1.10636	1.10967
	0.737665	0.781599	0.773106	0.755962	0.768954	0.804209	0.787406	0.80228	0.837693	0.841935	0.864088	0.915663	0.915524	0.901424	0.920231	0.860389	0.860126	0.815863	0.79413	0.741893	0.770483	0.786619	0.832763	0.836251	0.834831	0.827589	0.942595	0.956003	1.19279	1.13271	1.06398	1.07946	1.16468	1.2283	1.37908	1.35445	1.31251	1.25959	1.25839	1.44174	1.1332	1.29544	1.17887	1.2071	1.21953	1.35809	1.35677	1.43099	1.34254
	1.06395	1.09199	1.12911	1.08621	1.10095	1.07949	1.08094	1.09978	1.11305	1.12872	1.07057	1.10372	1.05107	0.989862	0.966846	0.969363	0.939237	0.908514	0.875584	0.890927	0.878166	0.846186	0.82716	0.85941	0.820577	0.822582	0.832167	0.807548	0.798487	0.784025	0.771314	0.802888	0.795982	0.823532	0.773075	0.774651	0.819017	0.795306	0.821178	0.816817	0.842333	0.85199	0.893188	0.883207	0.867902	0.867439	0.865279	0.842243	0.859057
	1.14305	1.13972	1.06646	1.09212	1.01002	1.05339	1.01223	1.11095	1.07629	1.12785	1.32744	1.34369	1.34616	1.39018	1.50798	1.59769	1.5763	1.6864	1.65772	1.61337	1.58323	1.6552	1.57252	1.76868	1.80935	1.82687	1.84567	1.92635	1.87088	1.86629	1.82583	1.83028	1.85753	1.73691	1.76228	1.91392	1.9796	1.83251	1.7953	1.82572	1.75894	1.89901	1.79362	1.89664	1.88611	1.85772	1.91497	1.84289	1.85581
	0.394662	0.401743	0.392376	0.365657	0.336334	0.371404	0.355464	0.367617	0.373681	0.353302	0.368022	0.384137	0.375257	0.38417	0.363302	0.36032	0.398568	0.407979	0.405094	0.397018	0.397846	0.389388	0.378629	0.342465	0.349009	0.373888	0.350888	0.3593	0.32556	0.375337	0.370117	0.359127	0.381145	0.437203	0.461892	0.484167	0.490837	0.507481	0.567787	0.568341	0.58498	0.556885	0.518932	0.556545	0.546637	0.535213	0.558878	0.549738	0.558882
	0.489797	0.575338	0.637625	0.625463	0.619234	0.630045	0.636026	0.702578	0.706349	0.699413	0.702054	0.723318	0.711745	0.746272	0.765588	0.800534	0.867691	0.921994	0.961127	0.904107	0.857715	0.838418	0.799694	0.795972	0.78072	0.818882	0.788827	0.798459	0.795631	0.832519	0.85644	0.962821	1.02616	1.02284	1.06059	1.03049	1.06038	1.041	0.974515	1.07414	1.01521	1.06344	1.01375	1.07783	1.0745	1.10486	1.12405	1.1421	1.1846
	0.678143	0.643335	0.686144	0.686516	0.669721	0.671267	0.637634	0.61711	0.615077	0.634413	0.625987	0.628413	0.679792	0.680519	0.690513	0.677764	0.662673	0.673782	0.686228	0.669078	0.6795	0.656295	0.66045	0.671308	0.655538	0.675065	0.655941	0.654791	0.677966	0.720472	0.749869	0.692111	0.743754	0.723428	0.750456	0.710888	0.749862	0.792698	0.783654	0.790418	0.830593	0.818427	0.876657	0.868172	0.906072	0.786286	0.818513	0.776722	0.807425
	0.732152	0.787955	0.771656	0.753773	0.74968	0.731545	0.731337	0.723779	0.717204	0.680898	0.740895	0.706763	0.734045	0.7388	0.804793	0.80052	0.81026	0.818504	0.811255	0.75513	0.756479	0.735252	0.742844	0.747733	0.748211	0.75676	0.737007	0.732559	0.771106	0.765034	0.751167	0.744011	0.774114	0.818155	0.806474	0.799923	0.802695	0.843858	0.898345	0.934021	0.890017	0.924979	0.923706	0.919843	0.918049	0.935597	0.909172	0.884116	0.88333
	0.40985	0.392629	0.398888	0.416981	0.411964	0.405861	0.421404	0.402346	0.406809	0.431635	0.366886	0.460233	0.460707	0.445763	0.475525	0.478515	0.488451	0.53054	0.512586	0.53957	0.525726	0.543448	0.552876	0.541665	0.583414	0.558653	0.595229	0.613512	0.623332	0.691701	0.689495	0.71705	0.759774	0.712827	0.735811	0.745806	0.744361	0.711832	0.685597	0.67709	0.619655	0.640315	0.641561	0.676177	0.707621	0.698538	0.742522	0.691965	0.798001
	0.700404	0.631883	0.71125	0.731167	0.78793	0.771383	0.824282	0.846811	0.883713	0.875422	0.978134	0.958003	0.87259	0.939267	0.875464	0.833166	0.858237	0.915671	0.916844	0.839782	0.803591	0.849409	0.81601	0.828499	0.788968	0.784685	0.762535	0.816503	0.826581	0.78227	0.818163	0.824982	0.843468	0.812993	0.816865	0.815348	0.812366	0.789701	0.777215	0.800103	0.795559	0.818695	0.833549	0.824422	0.959258	0.934142	0.9316	0.969343	0.936751
	0.952253	1.16631	1.04166	1.00501	1.02683	1.01663	1.15658	0.95118	1.23556	0.796594	1.01884	0.957705	0.88793	0.988293	0.897283	1.11867	0.907969	0.968702	1.0855	0.902296		1.01434	0.97936	1.04171	1.02739	1.03097	0.992886	1.12352	1.0196	0.993895	0.916994	1.04207	0.896976	1.05014	0.963796	0.783449	0.959544	0.984724	1.04271	0.961633	0.980094	0.962785	1.08475	0.926489	1.0172		0.971613	1.04929	1.05864
		1.141	1.00598	0.968838	0.988482	1.01732	0.984046	0.984194	1.0033	1.02337	1.02337	1.05423	1.07627	1.05977	1.08029	1.09713	1.13177	1.20089	1.19868	1.15951	1.14602	1.08394	1.1468	1.14509	1.18567	1.18925	1.19384	1.22436	1.22225	1.2488	1.24853	1.28398	1.32244	1.42147	1.41223	1.49261	1.56266	1.56273	1.54096	1.7438	1.63373	1.71795	1.74567	1.71053	1.59145	1.57303	1.48851	1.503	1.5007
		0.978483	0.996048	0.928011	0.908428	0.94929	1.00167	0.964612	1.03481	1.0387	1.02773	1.03635	0.992812	0.972916	0.959114	0.906239	0.894024	0.929832	0.927735	0.928403	0.907703	0.876998	0.824445	0.750123	0.746515	0.783682	0.809914	0.820534	0.854008	0.828586	0.802813	0.780153	0.749122	0.707453	0.72613	0.715241	0.725533	0.732463	0.715486	0.783599	0.770449	0.760501	0.792092	0.751539	0.821226	0.769672	0.807482	0.862041	0.843527
		0.904132	0.756066	0.672229	0.725611	0.773417	0.81618	0.831675	0.843542	0.878271	0.925943	0.965136	0.94616	0.960855	1.03212	1.05284	1.09148	1.16596	1.13555	1.15702	1.19126	1.13929	1.14848	1.11269	1.06545	1.01642	0.983744	0.994574	1.027	1.04422	1.03445	1.05957	1.06536	1.0996	1.12535	1.14689	1.13859	1.08271	1.08552	1.05903	1.06179	1.05432	1.10694	1.10663	1.14751	1.20529	1.21612	1.28498	1.31474
		1.46114	1.62532	1.62925	1.6794	1.46622	1.48056	1.49322	1.50006	1.52507	1.45328	1.49421	1.59824	1.56283	1.53165	1.59504	1.46076	1.52827	1.53098	1.55556	1.47014	1.4322	1.53885	1.52243	1.5617	1.52974	1.57578	1.59672	1.63455	1.70736	1.59696	1.65702	1.71271	1.54802	1.63398	1.55208	1.71818	1.61203	1.62704	1.63683	1.65906	1.64772	1.70312	1.63156	1.60565	1.65713	1.58524	1.66422	1.59636
		1.10556	1.14954	1.07662	1.11147	1.13024	1.05979	1.08768	1.10818	1.12856	1.15384	1.16357	1.20707	1.23785	1.23075	1.16674	1.27049	1.30635	1.28871	1.26353	1.28424	1.29241	1.29787	1.34145	1.34666	1.3152	1.34253	1.37634	1.39021	1.36391	1.36085	1.3309	1.31378	1.3411	1.24137	1.26898	1.22799	1.23775	1.20865	1.22923	1.26503	1.28411	1.36742	1.32837	1.32328	1.33584	1.32868	1.39012	1.45072
		1.12171	1.01069	0.818082	0.812477	0.604246	0.663905	0.674364	0.607306	0.60939	0.527109	0.568713	0.629059	0.634352	0.620992	0.64028	0.656308	0.702298	0.678277	0.691867	0.668922	0.690783	0.623912	0.662936	0.710371	0.748153	0.800663	0.771406	0.744938	0.777664	0.830533	0.861535	0.847616	0.853574	0.910169	0.954232	0.890211	0.858372	0.843839	0.84797	0.918948	0.947963	0.918702	0.968555	0.98057	0.937366	1.00483	1.06186	1.04796
		0.940108	0.905705	0.852226	0.885908	0.787169	0.785516	0.769529	0.815546	0.736966	0.743478	0.717502	0.654533	0.664083	0.655588	0.64594	0.722988	0.757019	0.735469	0.747915	0.752731	0.727834	0.67705	0.699451	0.684946	0.682732	0.677632	0.657623	0.70413	0.691659	0.697513	0.742884	0.695889	0.682735	0.684702	0.676924	0.645124	0.703356	0.73342	0.724976	0.69926	0.779065	0.761015	0.785009	0.830353	0.87447	0.888186	0.891265	0.897102
		0.750242	0.721486	0.706486	0.683641	0.693746	0.710355	0.715512	0.717437	0.700511	0.742287	0.782463	0.791495	0.840105	0.81579	0.843005	0.870176	0.925151	0.920749	0.902245	0.904164	0.914901	0.920245	0.93084	0.911396	0.927379	0.944429	0.955231	0.917628	0.94644	0.966963	0.932208	0.974912	0.914973	0.893242	0.921649	0.930623	0.919247	0.895486	0.896681	0.901669	0.871203	0.852834	0.846354	0.859121	0.883194	0.937094	0.921954	0.932827
		0.601619	0.591067	0.571864	0.566769	0.598636	0.600007	0.594408	0.532583	0.556438	0.553319	0.570584	0.581667	0.574964	0.57834	0.617829	0.59105	0.631077	0.617074	0.63362	0.624546	0.662148	0.691214	0.710387	0.673457	0.693596	0.700492	0.685795	0.720498	0.696853	0.760848	0.763782	0.815509	0.772273	0.796294	0.769333	0.741205	0.7123	0.70035	0.71614	0.711874	0.719886	0.713587	0.689388	0.726842	0.758355	0.780551	0.776129	0.777521
		0.688025	0.623169	0.624839	0.610418	0.644482	0.646553	0.702413	0.715237	0.704328	0.681	0.680831	0.655766	0.671013	0.668292	0.671827	0.66386	0.619436	0.550864	0.612761	0.587932	0.606352	0.610804	0.57905	0.624567	0.583128	0.51504	0.591331	0.512087	0.539981	0.578678	0.513344	0.496354	0.552941	0.55522	0.60889	0.554332	0.557919	0.575648	0.585912	0.583901	0.555314	0.597027	0.647613	0.653043	0.665764	0.613387	0.675344	0.71178
		0.498793	0.487165	0.50111	0.498015	0.480625	0.477121	0.427117	0.47801	0.468913	0.481225	0.476733	0.478729	0.500329	0.510814	0.527055	0.556399	0.560583	0.534751	0.537903	0.529137	0.519264	0.494641	0.50643	0.477646	0.50171	0.51846	0.536133	0.54764	0.545257	0.551465	0.553804	0.551929	0.560285	0.56686	0.588673	0.616079	0.609131	0.621633	0.612124	0.656936	0.697535	0.688979	0.716134	0.714928	0.724598	0.742345	0.768459	0.770205
		1.10745	1.10623	1.03799	0.942213	0.940149	0.967198	1.0022	0.968374	0.98651	1.01053	1.02399	0.999275	0.995637	0.909136	0.90105	0.97207	0.937671	0.849202	0.800012	0.887435	0.860932	0.820249	0.8561	0.884929	0.861946	0.902066	0.952825	1.01752	1.05607	1.09639	1.08853	1.09367	0.993899	0.957854	0.922738	0.953536	0.912474	0.964509	0.978995	0.991192	1.04096	1.07746	1.15649	1.21192	1.29028	1.33725	1.39256	1.42822
		0.897519	0.967902	1.10748	1.17477	1.26538	1.32068	1.21201	1.07353	0.984412	1.10534	1.0798	1.07101	1.10949	1.06838	1.20075	1.24218	1.35669	1.27447	1.35461	1.3433	1.30899	1.49605	1.53129	1.64511	1.55735	1.60095	1.58075	1.46387	1.43091	1.47122	1.56611	1.56451	1.52059	1.49864	1.48611	1.64215	1.63067	1.50123	1.66607	1.5428	1.54741	1.5741	1.54463	1.58147	1.60662	1.60704	1.59288	1.64153
		0.980443	0.945252	0.926449	0.920252	0.922587	0.902748	0.921644	0.866591	0.877909	0.857255	0.822768	0.79705	0.76404	0.725002	0.697533	0.689488	0.690744	0.6734	0.647226	0.661257	0.605965	0.656689	0.626129	0.630726	0.644807	0.635098	0.592383	0.633955	0.620743	0.627919	0.665337	0.672921	0.686343	0.650494	0.64159	0.627598	0.597054	0.630333	0.623694	0.632687	0.643269	0.618036	0.616566	0.610423	0.608034	0.614733	0.625773	0.662765
		0.566595	0.592848	0.574165	0.602987	0.577557	0.599296	0.620058	0.627739	0.63555	0.628992	0.660512	0.640551	0.667598	0.67088	0.662018	0.653563	0.651287	0.607153	0.614978	0.573458	0.594919	0.586741	0.565329	0.601558	0.592679	0.627739	0.664268	0.686623	0.727626	0.742506	0.768061	0.767143	0.787163	0.782377	0.78727	0.741321	0.747775	0.726896	0.742643	0.754713	0.738815	0.73834	0.74833	0.729663	0.73686	0.744339	0.748355	0.762391
		0.697847	0.656229	0.575117	0.633398	0.633661	0.636092	0.608122	0.64773	0.705732	0.676842	0.710605	0.748431	0.743036	0.752258	0.711482	0.692289	0.739791	0.694096	0.710969	0.734998	0.732939	0.748075	0.764232	0.782069	0.76093	0.785052	0.772832	0.806188	0.784204	0.750181	0.78926	0.79773	0.823359	0.778119	0.805491	0.803056	0.78786	0.813163	0.874926	0.853589	0.880971	0.87012	0.900494	0.930112	0.984279	0.99225	0.987627	1.02997
		0.872368	1.00219	0.993054	0.938191	0.986926	0.981903	0.970746	1.04523	1.0505	1.12242	1.21464	1.16346	1.07211	1.0951	1.08863	1.12025	1.17627	1.13731	1.09544	1.09151	1.09142	1.17671	1.17415	1.18806	1.25936	1.23132	1.30392	1.3912	1.31128	1.34403	1.34637	1.3754	1.35537	1.33353	1.30004	1.32816	1.23967	1.343	1.36954	1.33494	1.35392	1.36909	1.3054	1.31184	1.23304	1.11991	1.07829	1.0394
		0.631495	0.662148	0.618178	0.719781	0.671503	0.739686	0.740197	0.735266	0.70433	0.689793	0.715202	0.718701	0.674962	0.672346	0.705381	0.709678	0.710418	0.72844	0.692872	0.68802	0.689967	0.694277	0.68525	0.687652	0.702692	0.689907	0.724409	0.727091	0.726338	0.773045	0.799174	0.751634	0.792197	0.814174	0.813827	0.85738	0.863861	0.897039	0.897811	0.861572	0.836661	0.862829	0.849655	0.825234	0.767613	0.77122	0.780356	0.776123
		1.16577	1.09379	1.18056	1.20768	1.23759	1.20861	1.30014	1.32646	1.34384	1.39304	1.42422	1.47989	1.48026	1.57562	1.58737	1.54341	1.57055	1.59153	1.5951	1.53196	1.55827	1.42756	1.47785	1.4451	1.43234	1.51048	1.48886	1.54833	1.54909	1.58306	1.63428	1.71696	1.73427	1.72907	1.67511	1.67544	1.66579	1.57448	1.55707	1.58423	1.55795	1.59729	1.59237	1.52191	1.52421	1.56011	1.5762	1.575
		0.585771	0.620689	0.586992		0.58158	0.556757	0.551357	0.52467	0.498174	0.482087	0.4805	0.496528	0.472113	0.465365	0.487586	0.71802	0.521854	0.421669	0.532649	0.461075	0.399284	0.427977	0.581604	0.623637	0.656803	0.654099	0.660195	0.630039	0.625814	0.600405	0.605398	0.594111	0.581433	0.572639	0.608421	0.587938	0.619238	0.592284	0.605331	0.623991	0.628275	0.661523	0.686195	0.6968	0.648214	0.658508	0.68344	0.65659
		1.10301	0.960943	1.04263	0.99954	1.04694	1.04816	1.10103	1.10179	1.10346	1.06003	0.998579	1.01363	0.982619	0.942762	0.946907	0.950943	0.913744	0.93957	0.901004	0.890593	0.845716	0.849464	0.808593	0.803397	0.805887	0.810152	0.790784	0.795713	0.792349	0.760735	0.778894	0.777035	0.803736	0.841172	0.841203	0.859949	0.882166	0.843797	0.849018	0.874132	0.862146	0.874941	0.892481	0.87746	0.853033	0.904263	0.902998	0.922668
		0.352099	0.33713	0.360789	0.371678	0.409281	0.373946	0.361004	0.361149	0.34071	0.360816	0.40529	0.424269	0.345784	0.367255	0.410238	0.38526	0.350545	0.343905	0.321706	0.409929	0.38604	0.369118	0.366594	0.365335	0.331632	0.349842	0.388239	0.366254	0.362833	0.39423	0.381991	0.304378	0.410539	0.365911	0.433409	0.431446	0.443345	0.447803	0.438972	0.456186	0.409671	0.413056	0.392744	0.41574	0.43344	0.447328	0.413167	0.448993
			0.944689	0.965115	1.01462	1.00353	0.954222	1.11056	1.0515	1.01548	0.981482	0.994804	0.966464	0.857645	0.917058	0.887045	0.858332	0.838615	0.834686	0.835801	0.834984	0.886157	0.894329	0.945441	0.998495	1.03761	1.08034	1.0971	1.08782	1.10611	1.12951	1.14354	1.19211	1.23051	1.26329	1.29875	1.35424	1.34653	1.35922	1.39702	1.50492	1.53198	1.5531	1.53954	1.53292	1.50114	1.52506	1.36462	1.36088
			1.09107	1.11687	1.25326	1.28398	1.32449	1.39763	1.45639	1.56842	1.56073	1.6469	1.63551	1.60132	1.61484	1.58096	1.56187	1.55808	1.53994	1.41975	1.4291	1.33596	1.3076	1.29754	1.27494	1.34007	1.39303	1.35013	1.39543	1.38027	1.39447	1.4226	1.48486	1.47056	1.46862	1.51839	1.43493	1.47723	1.4303	1.49979	1.56995	1.62976	1.68024	1.62365	1.70207	1.71026	1.71742	1.76804	1.69043
			0.733785	0.778265	0.850192	0.869636	0.929276	0.965946	0.971648	0.95999	0.965562	0.961612	0.92611	0.886518	0.871992	0.863868	0.866743	0.854223	0.84651	0.78844	0.779631	0.768887	0.794913	0.808828	0.812232	0.805755	0.813929	0.82056	0.793326	0.826095	0.855802	0.863692	0.896501	0.896203	0.957376	0.954505	1.0008	1.03006	1.07647	1.06419	1.10111	1.12371	1.20745	1.2135	1.26455	1.29674	1.34281	1.30709	1.30795
			0.588132				0.725543	0.756687	0.720175	0.717979	0.687283	0.647876	0.64152	0.642202	0.649965	0.651486	0.672184	0.700381	0.613059	0.671054	0.664455	0.550798	0.610201	0.562069	0.581451	0.569496	0.602129	0.535233	0.57814	0.537017	0.550704	0.526053	0.542123	0.527121	0.521353	0.527796	0.510109	0.536713	0.519031	0.536494			0.569112	0.590126	0.57211	0.608528	0.625667	0.581781	0.579064
			1.13814	1.16073	1.17527	1.16328	1.09424	1.07116	1.07541	1.05844	1.06332	1.05199	1.04024	1.05849	1.09523	1.09189	1.09071	1.07349	1.07346	1.02794	1.03809	1.0109	1.08087	1.08652	1.03362	1.03052	1.05678	1.00999	1.0544	1.04534	1.11302	1.07932	1.09492	1.12596	1.16473	1.02893	1.03694	1.07162	1.07345	1.04245	1.09515	1.09429	1.03316	1.07216	1.00135	1.06118	1.04722	1.01447	1.04858
			1.00273		1.02839	1.05567	1.06268	1.14162	1.00447	1.18244	1.172	1.21973	1.22024	1.30193	1.27972	1.2568	1.27962	1.25906	1.24759	1.20739	1.19628	1.16993	1.06911	1.1124	1.10286	1.15926	1.15296	1.05676	1.14051	1.02975	0.972618	0.958464	1.01229	0.943374	0.954705	0.95379	0.927598	0.985021	1.01093	0.982471	0.978249	0.987687	0.969466	1.02092	1.00908	1.04878	1.0336	1.11282	1.11454
			1.63696	1.76549	1.70836	1.93628	1.73557	1.81956	1.45918	1.5648	1.72668	1.64767	1.6731	1.62173	1.64569	1.66742	1.49531	1.4927	1.4459	1.41332	1.34631	1.32107	1.37673	1.38736	1.36609	1.25468	1.18667	1.27217	1.32523	1.3344	1.30193	1.30837	1.29445	1.36444	1.31585	1.30966	1.35	1.29803	1.22144	1.23808	1.20782	1.27693	1.28296	1.27766	1.34142	1.34295	1.29831	1.31278	1.36148
			0.636126	0.626316	0.651063	0.659549	0.683182	0.725565	0.754746	0.781804	0.801004	0.822042	0.836568	0.806432	0.817126	0.804475	0.828748	0.79748	0.792292	0.776227	0.754044	0.790627	0.782588	0.77604	0.785444	0.788755	0.782671	0.788123	0.821569	0.852596	0.845166	0.842844	0.858362	0.887494	0.863732	0.873782	0.88051	0.878766	0.855759	0.807962	0.829793	0.786322	0.778374	0.76554	0.727621	0.773187	0.791631	0.807636	0.848897
			0.918576	0.788304	0.795184	0.78848	0.758762	0.71595	0.756014	0.802212	0.800856	0.810053	0.803119	0.890692	0.86686	0.861013	0.871172	0.821416	0.803292	0.79874	0.771061	0.767912	0.732612	0.744281	0.725643	0.757817	0.761574	0.783796	0.798299	0.827622	0.84445	0.870044	0.865782	0.873387	0.951684	0.930466	0.885521	0.934538	0.897774	0.915821	0.903324	0.909435	0.919772	0.888832	0.903316	0.950441	0.937237	0.945425	0.923686
			0.658111	0.640736	0.617341	0.589686	0.598171	0.602668	0.603545	0.62422	0.654565	0.660199	0.660691	0.698729	0.698464	0.681358	0.66004	0.665707	0.674532	0.682658	0.740145	0.735554	0.732322	0.74025	0.719538	0.728841	0.75239	0.800661	0.80512	0.78021	0.775461	0.760346	0.760925	0.743709	0.763632	0.737669	0.723067	0.71057	0.704636	0.72505	0.771214	0.768434	0.794609	0.78777	0.80097	0.776011	0.757637	0.811746	0.818307
			0.706802	0.699221	0.725258	0.714157	0.74872	0.776422	0.761274	0.768792	0.726194	0.740335	0.726865	0.681784	0.689115	0.70818	0.695108	0.7127	0.678923	0.650753	0.62094	0.6039	0.614451	0.618275	0.635746	0.646381	0.656146	0.660821	0.652583	0.652484	0.643156	0.618344	0.630991	0.632244	0.652013	0.653267	0.662106	0.670796	0.667888	0.69693	0.677396	0.665966	0.685829	0.688893	0.703611	0.706307	0.703164	0.673614	0.646112
			0.697566	0.666716	0.691431	0.716551	0.721893	0.812976	0.827092	0.800096	0.820189	0.816902	0.837379	0.850996	0.865723	0.874285	0.897327	0.888127	0.819411	0.862661	0.873399	0.883221	0.926519	0.93001	1.00086	0.90714	0.967821	0.884368	0.986104	0.985493	0.968609	0.908178	0.938955	0.946504	0.8984	0.899804	0.920238	0.943228	0.935382	0.938787	1.0261	1.06974	1.07648	1.14675	1.14998	1.21078	1.20221	1.17763	1.1625
			1.23253	1.34711	1.31239	1.26865	1.34516	1.31591	1.27332	1.40089	1.3325	1.30805	1.37714	1.30452	1.29685	1.40531	1.30393	1.30365	1.21911	1.21685	1.2394	1.19733	1.22701	1.16099	1.29299	1.23219	1.1751	1.29007	1.3103	1.30774	1.2539	1.23438	1.24701	1.3448	1.31113	1.36684	1.30504	1.34441	1.26718	1.32167	1.29236	1.30895	1.25757	1.24991	1.21823	1.29678	1.24672	1.19724	1.35232
			0.738953	0.729912	0.74179	0.783388	0.770159	0.806072	0.821397	0.862717	0.894739	0.908183	0.916279	0.840183	0.857514	0.874831	0.921761	0.907151	0.816442	0.817773	0.801814	0.804993	0.807487	0.82008	0.804959	0.808818	0.800646	0.81042	0.832351	0.870495	0.93338	0.990477	1.06065	1.08031	1.09273	1.08331	1.01885	1.02386	1.01288	1.04456	1.04679	1.02923	0.990192	1.02049	1.02278	1.06757	1.08596	1.03765	1.01523
			0.965997	1.0228	1.03999	1.04138	0.992805	0.970786	0.95278	0.963145	0.96868	0.956067	0.981492	0.913303	0.968843	0.969589	0.937414	0.948711	0.903976	0.879356	0.875326	0.835758	0.79907	0.812234	0.801909	0.81415	0.81151	0.829054	0.825807	0.857336	0.865986	0.872243	0.881912	0.886288	0.877273	0.889998	0.943928	0.942189	0.97935	0.975686	0.978014	0.942426	0.999762	1.00431	1.01758	1.06755	1.06295	1.0433	1.04723
			1.071	0.994456	0.998569	0.98663	0.983624	1.01308	1.00128	0.949176	0.95228	0.934401	0.895167	0.854553	0.806698	0.784023	0.738617	0.696025	0.679452	0.627177	0.644408	0.651833	0.692265	0.715281	0.730071	0.769654	0.766726	0.76512	0.751861	0.793833	0.754644	0.85589	0.906933	0.913678	0.885999	0.887961	0.858399	0.839961	0.834884	0.876107	0.887355	0.925949	0.87	0.887481	0.838086	0.849398	0.828299	0.85877	0.870754
			0.394811	0.434462	0.454333	0.467224	0.45929	0.460799	0.480152	0.464593	0.46048	0.478163	0.479751	0.462572	0.451371	0.47826	0.546696	0.528767	0.542377	0.545375	0.553087	0.551369	0.561396	0.562948	0.575006	0.574752	0.622479	0.6547	0.694536	0.674645	0.6726	0.667404	0.639569	0.65131	0.69452	0.705212	0.705022	0.687616	0.671212	0.686697	0.648055	0.648557	0.668042	0.74962	0.792654	0.799217	0.826831	0.674497	0.63666
			0.674079	0.670124	0.68831	0.672319	0.685618	0.6604	0.690594	0.704481	0.70235	0.717393	0.733451	0.720222	0.727675	0.744449	0.749202	0.752784	0.742761	0.727658	0.7118	0.700257	0.679174	0.712028	0.724655	0.753025	0.78803	0.800893	0.814303	0.877943	0.888181	0.913904	0.923521	0.926938	0.941654	0.955521	0.986757	0.980035	0.948522	0.980114	1.00405	0.960314	0.946511	0.954611	0.966084	0.961168	0.990415	0.990791	1.01652
			0.855905	0.796718	0.855919	0.892136	0.938584	0.98433	0.973106	1.01265	1.04571	1.0379	1.03191	1.3363	1.1967	1.46889	1.44034	1.13688	1.74965	1.87092	1.54096	1.24732	1.26621	1.20506	1.37709	1.31054	1.31071	1.17939	1.25049	1.52038	1.28304	1.35957	1.45526	1.32918	1.2899	1.36982	1.5058	1.39485	1.49014	1.46235	1.39723	1.4717	1.57463	1.40439	1.38295	1.46456	1.74467	1.46441	1.68844
			1.9262	2.02763	1.76358	1.56005	1.61144	1.53867	1.45053	1.81179	1.61538	1.53048	1.57009	1.42006	1.60693	1.41574	1.42643	1.32331	1.6341	1.46942	1.4756	1.67621	1.66948	1.88103	1.78172	1.98846	1.94039	1.67134	1.74324	2.06257	1.72492	1.94013	2.01655	1.74931	1.79334	1.95566	1.87405	1.96296	2.1404	1.87257	1.60833	2.07297	1.76247	1.60043	1.76882	1.75016	1.80075	1.73114	1.96469
			1.23313	1.22714	1.33772	1.25093	1.30777	1.31319	1.42279	1.34988	1.45491	1.44155	1.49609	1.52435	1.50463	1.47966	1.32676	1.42071	1.31483	1.32875	1.31563	1.45204	1.29934	1.41327	1.40177	1.33928	1.48586	1.4855	1.64975	1.63973	1.54617	1.46912	1.52278	1.44411	1.42021	1.37	1.41146	1.53001	1.47295	1.4593	1.50759	1.51112	1.6785	1.59794	1.54999	1.49328	1.45941	1.48877	1.56454
			4.21917	1.83739	1.58172	1.72107	1.84191	1.53692	1.48656	1.48966	1.19611	1.1533	0.979743	1.0651	0.947877	0.982663	0.970219	0.890921	1.10609	1.07226	1.39621	1.46761	1.38999	1.18992	1.14654	1.2067	1.10972	1.12341	1.0969	1.21886	1.16901	1.01437	1.14638	1.1379	1.22569	1.23009	1.07154	1.17689	1.18998	1.10333	1.22416	1.31457	1.17739	1.23656	1.12614	1.25056	1.14501	1.29495	1.39403
			0.722291	0.669941	0.677418	0.624931	0.604942	0.593604	0.544103	0.543087	0.527589	0.555147	0.593602	0.612003	0.626946	0.647699	0.671806	0.648125	0.67472	0.65241	0.66357	0.643588	0.654761	0.690124	0.648282	0.684784	0.676792	0.661593	0.651836	0.645751	0.691694	0.720441	0.73987	0.799573	0.815002	0.833949	0.869004	0.897192	0.899976	0.992591	1.07409	1.06957	1.09363	1.10344	1.09041
			0.706515	0.655159	0.648086	0.700271	0.694856	0.774225	0.830162	0.836121	0.901602	0.889666	0.932085	0.90733	0.892168	0.945332	0.971835	0.988545	0.996684	0.978537	0.996716	1.03562	1.0638	1.07268	1.1441	1.1213	1.16427	1.16272	1.15319	1.19942	1.22656	1.18013	1.25447	1.24986	1.25944	1.25072	1.24671	1.24342	1.14774	1.09494	1.07104	0.980817	1.03009	0.985709	1.00713	1.08324	1.05965	1.09003	1.03574
			0.888846	0.820983	0.810218	0.748054	0.671051	0.640665	0.626109	0.617026	0.624646	0.587093	0.584444	0.570843	0.572135	0.55006	0.56369	0.555107	0.542145	0.54406	0.537709	0.538504	0.553862	0.513355	0.559539	0.573782	0.586926	0.559025	0.607871	0.606129	0.61655	0.613781	0.611481	0.601715	0.604338	0.565906	0.558917	0.567655	0.615447	0.614448	0.602529	0.627356	0.61173	0.579609	0.607405	0.624211	0.635333	0.656385	0.663607
			0.950314	1.02748	0.931796						1.08712	0.978603	0.992616	1.00228	0.987651	0.986092	1.02412	1.03758	0.961776	0.969483	0.947198	0.964843	0.960759	0.94489	0.928845	0.940086	0.947778	0.92835	0.961958	0.962767	0.95418	0.970694	0.989872	0.995806	1.00893	1.01849	1.08971	1.12465	1.1631	1.18455	1.21273	1.19077	1.20132	1.22083	1.2338	1.20068	1.21575	1.20048	1.23364
			1.09245	1.17486	1.09243	1.13735	1.11604	1.07652	1.22551	1.05051	1.02424	1.13148	1.03323	1.0117	1.01113	0.969024	1.07746	1.02709	0.99137	1.02874	0.959565	0.955016	1.04127	1.02239	1.12672	1.05937	1.04805	0.944182	1.06601	0.987013	1.02022	0.953586	1.05704	0.895647	0.989801	1.05691	1.12259	1.06275	1.07346	1.10413	1.08686	1.06161	1.08931	1.0751	0.969426	0.975141	0.97047	1.11246	1.11281
				1.09639	1.10965	1.0296	1.0788	1.05139	1.02074	1.02303	0.9818	1.02511	1.00113	1.0535	1.02171	1.01403	1.02973	0.992634	0.963744	0.947663	0.920344	0.8978	0.936938	1.00174	0.97536	1.06008	1.0994	1.14855	1.17326	1.20382	1.21213	1.15868	1.12008	1.0435	1.02741	1.03014	1.0467	1.11577	1.07298	1.0428	1.04347	1.09899	1.08642	1.13738	1.05315	1.09992	1.05202	1.0388	1.04533
				0.813699	0.745198	0.798783	0.811654	0.822976	0.865392	0.904867	0.885603	0.93412	0.948595	0.886154	0.915441	0.905943	0.904817	0.856058	0.849846	0.766035	0.715338	0.743742	0.799171	0.775559	0.83124	0.818943	0.802232	0.838942	0.856642	0.843281	0.883141	0.863455	0.892286	0.945584	0.966999	0.970532	0.970882	0.980641	0.976205	1.00027	0.967305	0.99541	1.03521	1.02175	1.02659	1.09955	1.09937	1.05449	1.05924
				0.777103	0.701419	0.711861	0.750711	0.654332	0.71962	0.732366	0.755844	0.786859	0.793671	0.774939	0.766223	0.774287	0.811716	0.781534	0.787568	0.764264	0.734192	0.735509	0.765456	0.780473	0.763222	0.7961	0.8237	0.814542	0.847413	0.824086	0.812208	0.862643	0.862283	0.822615	0.861512	0.88202	0.903533	0.91075	0.903901	0.930014	0.967569	0.932458	0.954244	0.972687	0.982681	0.980174	0.955222	0.988398	0.977629
				0.788064	0.68715	0.754291	0.779103	0.764124	0.76595	0.769178	0.77033	0.820293	0.823969	0.873628	0.898741	0.932947	0.90686	0.903617	0.881071	0.886556	0.870333	0.836657	0.833508	0.827454	0.779615	0.759773	0.765402	0.745956	0.725475	0.679746	0.664108	0.676473	0.707576	0.764098	0.81042	0.831574	0.90308	0.964792	0.956817	1.03969	1.00684	0.968054	0.929913	0.940401	0.944092	0.973931	0.973766	0.989734	1.03741
				0.830006	0.873403	0.884323	0.907357	0.919254	0.892715	0.874982	0.829619	0.826637	0.790626	0.804633	0.763366	0.809322	0.829165	0.859376	0.83377	0.824105	0.844121	0.844587	0.850026	0.870866	0.908245	0.933593	0.953333	0.96965	0.966954	0.912867	0.940588	0.906925	0.88097	0.865572	0.828436	0.836246	0.912331	0.844169	0.895158	0.879373	0.885841	0.866954	0.88321	0.916258	0.938297	0.930203	0.92029	0.974996	0.995323
				0.871964	0.976241	1.00077	1.0171	1.01177	1.03135	1.05288	1.0684	1.11886	1.13644	1.16133	1.14256	1.13124	1.11392	1.11092	1.12801	1.12203	1.10205	1.1052	1.12419	1.14558	1.15065	1.15491	1.20381	1.1855	1.18939	1.21437	1.24848	1.28729	1.33317	1.36904	1.40318	1.45572	1.42606	1.44413	1.41655	1.39833	1.42994	1.36822	1.42529	1.48272	1.54469	1.53301	1.62529	1.58696	1.64222
				1.09035	1.10022	1.06913	1.09156	1.09962	1.09743	1.08563	1.08601	1.05515	1.09914	1.11716	1.13916	1.13867	1.16629	1.23585	1.20842	1.16973	1.12905	1.01815	0.897037	0.910011	0.880757	0.848608	0.871361	0.876214	0.870247	0.886462	0.903604	0.982934	0.977898	1.02924	1.02909	1.0658	1.02737	1.07724	1.08736	1.13022	1.09071	1.10985	1.06407	1.04899	1.00654	1.01346	0.983638	1.02068	0.988066
				0.610184	0.628328	0.606206	0.607613	0.641906	0.621951	0.59612	0.617233	0.63156	0.645897	0.630891	0.677375	0.656596	0.700487	0.687922	0.670234	0.684173	0.711817	0.699602	0.672218	0.653315	0.660266	0.686466	0.730037	0.750463	0.737107	0.769238	0.800872	0.817491	0.828382	0.837399	0.823995	0.875736	0.87409	0.912557	0.901056	0.857723	0.882093	0.892657	0.886438	0.878829	0.883503	0.881792	0.940647	0.944208	1.01088
				1.16863	1.04245	1.26288	1.30933	1.46653	1.45064	1.47948	1.41813	1.37596	1.4298	1.35393	1.314	1.33578	1.28073	1.25862	1.26402	1.20276	1.30247	1.30613	1.39168	1.40632	1.47614	1.46228	1.4863	1.40972	1.57375	1.6204	1.67559	1.7789	1.70722	1.71172	1.71325	1.74307	1.74217	1.9043	1.89836	1.90699	1.77423	1.71697	1.80713	1.79577	1.83299	1.93043	1.94363	1.94565	1.89971
				0.956498	1.03633	0.965365	0.922906	0.935229	0.852044	0.832073	0.812651	0.807492	0.803693	0.792534	0.813176	0.789018	0.847123	0.864926	0.789934	0.732812	0.735265	0.7261	0.750344	0.809092	0.795713	0.823777	0.874104	0.892168	0.860473	0.828887	0.820855	0.82557	0.83634	0.800496	0.801746	0.796783	0.823136	0.810748	0.80692	0.817337	0.802631	0.833731	0.892947	0.86931	0.873949	0.881333	0.869114	0.867342	0.873093
				0.601642	0.599638	0.61852	0.647444	0.651117	0.612614	0.692293	0.711495	0.746729	0.794682	0.746824	0.803106	0.844424	0.847795	0.865428	0.890252	0.840074	0.857388	0.846733	0.843924	0.83838	0.865606	0.828957	0.803678	0.796367	0.769535	0.76912	0.783363	0.795779	0.793099	0.79838	0.784135	0.802497	0.818605	0.793679	0.786951	0.801975	0.81092	0.810941	0.817673	0.831458	0.853766	0.865706	0.876687	0.899623	0.907786
				0.52973	0.559148	0.62564	0.647809	0.625165	0.608889	0.611341	0.614099	0.614232	0.679491	0.704357	0.682239	0.704083	0.799098	0.871245	0.85989	0.781589	0.704833	0.695875	0.70764	0.674963	0.668427	0.766819	0.744854	0.769596	0.726754	0.683539	0.768975	0.769305	0.830884	0.842335	0.718513	0.79475	0.856917	0.827709	0.80418	0.709097	0.724024	0.747489	0.755928	0.726518	0.719548	0.690657	0.703676	0.721076	0.725157
				1.14758	1.03826	1.16032	1.11274	1.16076	1.16411	1.14839	1.13821	1.12843	1.11213	1.19719	1.15385	1.1316	1.11551	1.13269	1.1894	1.04345	0.983525	0.985123	1.04495	1.11256	1.04182	1.0441	1.06359	1.12727	1.10817	1.16485	1.13638	1.03456	1.00927	0.964678	0.930564	0.90026	0.949983	1.00679	1.01903	1.07904	1.08655	1.08548	1.09689	1.05545	1.01402	1.00618	0.966172	0.94809	0.905429
				0.923638	0.926245	0.899161	0.891859	0.85074	0.875687	0.859958	0.898138	0.876549	0.857378	0.853436	0.890444	0.895936	0.894496	0.894767	0.881416	0.84348	0.822461	0.798391	0.792035	0.802818	0.84138	0.86608	0.88383	0.904173	0.921433	0.978462	1.01009	1.0638	1.1195	1.15525	1.25441	1.26354	1.31761	1.34665	1.2681	1.17606	1.14682	1.05271	1.03571	1.04138	1.06116	1.03431	1.0675	1.01888	1.06016
				0.731301	0.765178	0.761595	0.765773	0.811136	0.864084	0.882007	0.91122	0.963602	0.973122	1.01446	1.07156	1.08316	1.12203	1.12407	1.13569	1.10097	1.05475	1.02594	1.0244	1.05157	1.10808	1.14707	1.14763	1.21606	1.28882	1.38303	1.4538	1.52246	1.56947	1.60717	1.67421	1.66664	1.70573	1.71985	1.67309	1.67862	1.72075	1.70199	1.6686	1.60267	1.54006	1.51257	1.53039	1.50582	1.48379
				0.950224	0.971855	0.99639	1.0424	1.07489	1.11138	1.13572	1.14521	1.05806	1.00612	1.04109	1.04137	1.04102	1.05263	1.06643	1.07078	1.0466	1.03234	1.03859	1.03922	1.14846	1.15814	1.17379	1.23309	1.25688	1.25478	1.32027	1.35003	1.36676	1.30909	1.30713	1.384	1.38514	1.36998	1.36173	1.3499	1.33403	1.33056	1.31922	1.321	1.28723	1.37154	1.40364	1.51423	1.55968	1.57558
				1.16624	1.13019	1.17925	1.059	1.09712	1.2173	1.04567	1.17945	1.10638	1.21861	1.14416	1.29223	1.1235	1.07605	1.11175	1.07963	1.07299	1.07096	1.13594	1.10924	1.11256	1.13557	1.09632	1.10441	1.13758	1.10683	1.08494	1.11635	1.10564	1.15106	1.15514	1.11236	1.15366	1.14211	1.10873	1.16695	1.18526	1.26141	1.19991	1.17946	1.17979	1.3019	1.30084	1.19617	1.27765	1.37162
				0.625582	0.627489	0.613073	0.732256	0.582011	0.584313	0.567059	0.63013	0.619376	0.620722	0.602417	0.638657	0.653235	0.684066	0.737951	0.744976	0.735635	0.754666	0.707731	0.678884	0.750692	0.755744	0.761527	0.768692	0.831864	0.845655	0.849665	0.844481	0.893293	0.896424	0.946413	0.929542	0.966115	0.96515	0.959462	0.955169	0.944873	0.937543	0.971827	0.957005	1.00165	0.971949	0.9643	0.965202	0.970932	0.993841
				0.888235	1.01086	1.05649	1.10013	1.12094	1.09915	1.02225	1.15814	1.18025	1.22389	1.2346	1.29198	1.39557	1.3853	1.38529	1.36158	1.39752	1.42292	1.46796	1.4922	1.48774	1.58663	1.66188	1.64505	1.67161	1.70397	1.75269	1.69021	1.71977	1.73133	1.77579	1.71365	1.68439	1.74542	1.83897	1.77868	1.83639	1.83658	1.79027	1.93367	1.88105	1.95666	1.94057	1.96375	1.86913	1.93379
				1.03538	1.32911	1.22835	1.17958	1.15299	1.24702	1.21189	1.22857	1.20604	1.29347	1.26767	1.19935	1.30245	1.26312	1.21695	1.10972	1.15299	1.14181	1.27631	1.30666	1.21849	1.42288	1.47708	1.66153	1.42982	1.30901	1.31359	1.21714	1.20614	1.92921	1.18187	1.13765	1.19571	1.38109	2.15953	2.26268	2.27139	1.93799	1.67502	1.98278	2.09253	1.46558	1.69034	1.1091	1.3649	1.80545
				1.22099	1.21895	1.16538	1.05247	1.28198	1.30797	1.3222	1.23924	1.19941	1.16304	1.10591	1.02011	0.984569	0.986234	0.993207	0.963617	0.995236	0.969527	1.04882	1.09042	1.03629	1.04416	1.08207	1.13564	1.08901	1.07099	1.05637	1.05104	0.98826	0.951084	0.872745	0.897948	0.905373	0.901323	0.931268	0.907724	0.98256	1.02318	1.07398	1.16147	1.25773	1.28489	1.40192	1.50281	1.57942	1.54295
				0.571645	0.577631	0.57468	0.581201	0.563621	0.561512	0.54697	0.535324	0.522303	0.511791	0.528765	0.562368	0.545381	0.564202	0.612245	0.595291	0.580129	0.592027	0.612835	0.627445	0.645766	0.657116	0.671509	0.691499	0.715828	0.715757	0.780171	0.768308	0.842733	0.812325	0.855998	0.824683	0.827039	0.8149	0.779556	0.801281	0.802973	0.714013	0.744376	0.737633	0.748828	0.736671	0.688749	0.664614	0.661116	0.715149
				0.75343	0.755977	0.766042	0.749818	0.759461	0.748214	0.784607	0.780422	0.79928	0.825928	0.85581	0.826663	0.853635	0.833457	0.871744	0.871364	0.862672	0.859579	0.861184	0.905727	0.908664	0.932094	0.936529	0.97667	0.961502	0.940177	0.97817	0.99649	0.992812	0.974435	0.977005	0.966878	0.984754	0.939597	0.920196	0.946312	0.979316	1.01495	1.0244	1.02216	1.0662	1.07253	1.06826	1.0803	1.11599	1.17069
					0.727721	0.732294	0.754915	0.732292	0.729301	0.789987	0.864751	0.917506	0.924172	0.93688	0.941545	1.00527	1.07928	1.056	1.02015	0.990018	0.998882	1.0329	1.04736	1.0962	1.15285	1.13272	1.19754	1.21087	1.18317	1.21175	1.20653	1.23821	1.32031	1.38227	1.31322	1.39768	1.35066	1.372	1.36207	1.34171	1.35711	1.30545	1.27203	1.24278	1.17009	1.17652	1.11925	1.12599	1.08948
					0.589669	0.594231	0.595802	0.56828	0.567614	0.576478	0.564955	0.543259	0.564407	0.566845	0.57143	0.634459	0.67311	0.656346	0.705623	0.723552	0.75986	0.775234	0.800383	0.781447	0.723161	0.756127	0.820508	0.763521	0.759783	0.76184	0.742155	0.735325	0.765906	0.750759	0.771464	0.761109	0.77121	0.772725	0.766726	0.783366	0.74955	0.710815	0.683947	0.656437	0.678763	0.724136	0.695379	0.715293	0.670695
					0.726142	0.667155	0.667151	0.686906	0.742129	0.743377	0.738236	0.761367	0.847256	0.894436	0.886231	0.880542	0.892251	0.805217	0.794005	0.856415	0.833416	0.759623	0.784012	0.914639	0.923653	0.937541	1.07373	1.02115	0.846096	1.052	1.0667	1.10668	1.14352	1.18565	1.23668	1.27873	1.33012	1.38427	1.36641	1.37281	1.38466	1.3743	1.35103	1.34739	1.40557	1.4028	1.39669	1.35146	1.36499
					0.738703	0.688592	0.800574	0.793865	0.899962	0.842377	0.953066	0.940997	1.0068	1.02203	1.10347	1.1073	1.15	1.17291	1.12111	1.12574	1.0836	1.09837	1.0875	1.1013	1.1055	1.09729	1.1469	1.18832	1.17122	1.15398	1.15993	1.15362	1.12019	1.10352	1.09304	1.05569	1.04213	0.993908	0.989645	0.980864	0.974099	0.946523	0.910042	0.871884	0.888123	0.880004	0.873013	0.869492	0.88456
					0.947052	0.997578	0.986355	1.09175	1.11998	1.19345	1.26475	1.34805	1.36549	1.44329	1.4706	1.50241	1.49854	1.46201	1.46118	1.36232	1.32728	1.30188	1.25659	1.20567	1.10637	1.07972	1.03805	1.05203	1.05176	1.06472	1.0943	1.09867	1.05764	1.0702	1.06702	1.10593	1.08657	1.10461	1.11164	1.13726	1.11946	1.16357	1.16768	1.14716	1.10467	1.10472	1.14158	1.13446	1.15811
					0.613073	0.631692	0.667071	0.736322	0.746916	0.766509	0.827087	0.842786	0.871329	0.883275	0.896961	0.872754	0.842457	0.864127	0.860016	0.796211	0.731242	0.686419	0.627882	0.596659	0.593551	0.647615	0.652591	0.658615	0.661291	0.657339	0.681235	0.669929	0.661018	0.68289	0.678976	0.720864	0.702163	0.747368	0.777347	0.783123	0.809914	0.833438	0.872801	0.914705	0.949902	0.991353	0.986141	1.00447	1.04323
					1.15816	1.14796	1.15871	1.09923	1.11454	1.1365	1.0868	1.10812	1.04937	1.04624	1.07743	0.997612	0.998133	0.969452	0.966662	0.890565	0.827907	0.86081	0.830809	0.816741	0.859701	0.858138	0.844212	0.863156	0.826029	0.857703	0.894958	0.906552	0.954431	0.982984	1.02801	1.06105	1.07982	1.07292	1.06749	1.1009	1.13811	1.16601	1.20713	1.23279	1.22217	1.24768	1.22975	1.17486	1.11092
					1.1773	1.12448	0.976212	1.05367	1.11244	1.15238	1.15154	1.22355	1.22024	1.22311	1.15891	1.20512	1.1593	1.11745	0.990795	1.05997	1.03393	1.03701	1.09585	1.05514	1.03685	1.08505	1.16934	1.18525	1.27993	1.27471	1.50034	1.49196	1.55088	1.46692	1.61859	1.64008	1.56156	1.54042	1.5119	1.50698	1.44005	1.49855	1.47097	1.4897	1.42937	1.46464	1.43597	1.4499	1.41938
					1.03382	0.94403	0.963192	0.929425	0.895844	0.893266	0.848879	0.817843	0.743397	0.750055	0.726971	0.72363	0.797874	0.808269	0.769672	0.802411	0.782799	0.764624	0.77457	0.782242	0.781026	0.786942	0.790639	0.816424	0.818003	0.820648	0.829754	0.852618	0.873045	0.890474	0.935009	0.982317	0.984976	1.01175	1.04109	1.06802	1.07891	1.03269	1.03492	1.023	1.01698	0.993271	0.980075	0.966594	0.960366
					0.903533	0.943823	0.916693	0.974471	1.01593	1.05272	1.06503	1.07174	1.11237	1.11895	1.12052	1.14578	1.1577	1.20339	1.17113	1.14088	1.13044	1.17065	1.17061	1.20949	1.19151	1.29981	1.26142	1.27907	1.34045	1.29305	1.33156	1.36415	1.37521	1.35479	1.33025	1.356	1.32146	1.39617	1.36737	1.39413	1.4135	1.45928	1.44746	1.47353	1.45868	1.50633	1.48192	1.49569	1.55199
					0.709247	0.711422	0.739338	0.712522	0.751396	0.734811	0.696441	0.676586	0.683916	0.679321	0.718507	0.758053	0.812683	0.851267	0.858369	0.833021	0.887365	0.876644	0.896074	0.925295	0.938135	1.01622	1.00413	1.03188	1.08439	1.14959	1.21617	1.27803	1.31346	1.32351	1.39832	1.41197	1.40474	1.41672	1.42779	1.39612	1.35336	1.33139	1.29867	1.32603	1.34046	1.28279	1.23979	1.21716	1.19296
					0.593917	0.702935	0.709206	0.692639	0.707168	0.697108	0.70328	0.732815	0.739848	0.708016	0.669343	0.666595	0.696814	0.698728	0.715262	0.711818	0.713586	0.742488	0.724596	0.747727	0.711116	0.746473	0.737371	0.739869	0.671811	0.659958	0.64233	0.622453	0.631105	0.644758	0.65333	0.632232	0.650453	0.635685	0.618389	0.634327	0.624434	0.612672	0.623091	0.642297	0.643985	0.626431	0.649605	0.629757	0.609004
					1.33148	1.36105	1.30823	1.38958	1.39483	1.34318	1.49999	1.52371	1.5583	1.53365	1.60519	1.6491	1.60998	1.62758	1.67986	1.71982	1.67778	1.60876	1.59938	1.542	1.66027	1.62621	1.65449	1.70217	1.81862	1.82103	1.92539	1.90119	1.89397	1.80055	1.95	1.88224	1.87606	1.83381	1.80408	1.78877	1.72798	1.77934	1.70721	1.70614	1.73465	1.83831	1.83014	1.87209	1.86479
					1.04579	1.08475	1.13183	1.15935	1.24868	1.25083	1.31582	1.33275	1.28213	1.21103	1.18766	1.23705	1.17181	1.21981	1.20706	1.17382	1.1527	1.16809	1.16799	1.21451	1.19081	1.21281	1.23715	1.21145	1.20759	1.19719	1.23207	1.28866	1.24196	1.24044	1.30176	1.25701	1.29715	1.27055	1.2477	1.25295	1.21704	1.19593	1.19774	1.25189	1.26154	1.27062	1.27778	1.27288	1.2592
					0.585677	0.646253	0.670248	0.680704	0.670371	0.670637	0.653309	0.634624	0.648378	0.654528	0.624588	0.63744	0.623698	0.623337	0.598438	0.581949	0.584876	0.579524	0.562376	0.528706	0.552341	0.556923	0.571425	0.581083	0.565225	0.574821	0.564136	0.569063	0.572526	0.600102	0.604966	0.613728	0.611768	0.658783	0.658619	0.636733	0.589581	0.582422	0.609078	0.610998	0.628246	0.589536	0.61796	0.61982	0.623066
					0.765082	0.747254	0.722869	0.750231	0.794983	0.852901	1.00416	1.0525	1.05581	1.13056	1.09538	1.14193	1.16894	1.19013	1.16378	1.1097	1.11677	1.05514	1.0102	0.976392	0.930577	0.902278	0.903981	0.934696	0.955807	0.996656	1.00979	1.03904	1.08804	1.1297	1.11905	1.12898	1.15065	1.20682	1.22707	1.25446	1.21506	1.19136	1.22351	1.20613	1.21562	1.2675	1.29176	1.28428	1.30282
					1.25207	1.24125	1.34862	1.46413	2.19608	1.3852	1.78875	1.59046	2.51431	3.36424	1.8694	1.66662	1.44325	2.19358	2.09058	1.83869	1.68407	2.08704	2.26118	1.59824	1.76081	2.24363	2.0189	1.32467	1.48213	2.80825	2.07339	2.13668	1.79245	1.97337	2.09381	1.96414	2.29506	1.97949	2.24796	2.30697	2.63837	2.84793	2.2399	2.82678	2.43074	2.95108	2.80965	2.74322	1.98384
					0.962391	0.987311	1.04712	0.978443	0.95359	0.905657	0.95411	0.950098	0.957376	0.937974	0.985956	1.00748	1.04125	1.07969	1.11083	1.06424	1.01159	0.999245	1.01895	1.06947	1.07616	1.04292	1.10686	1.0627	1.07163	1.0615	1.09907	1.1136	1.09907	1.13949	1.15954	1.16763	1.18148	1.20312	1.18953	1.21378	1.19281	1.16163	1.1971	1.19148	1.19857	1.21538	1.24751	1.27411	1.35903
					0.726154	0.734836	0.759366	0.736673	0.722749	0.728442	0.727709	0.706911	0.710398	0.711656	0.700985	0.699322	0.747382	0.747927	0.740083	0.770328	0.771058	0.771745	0.784451	0.800767	0.819518	0.790101	0.752178	0.769216	0.745183	0.787611	0.746106	0.759699	0.782301	0.803471	0.813963	0.850403	0.8372	0.842331	0.86373	0.903207	0.913499	0.908418	0.873405	0.929726	0.913798	0.925997	0.91213	0.868799	0.853843
					0.859019	0.771415	0.817805	0.900952	0.879625	0.91783	0.963211	1.08989	1.045	1.03258	0.908193	0.92021	0.831689	0.826245	0.807889	0.799047	0.743226	0.729524	0.768618	0.809117	0.830882	0.862464	0.907785	0.956415	0.942081	0.911415	0.987573	0.978992	0.975088	1.02726	1.07568	1.11678	1.18278	1.16276	1.22259	1.20865	1.25359	1.20076	1.20942	1.11897	1.11184	1.02651	1.01532	0.996646	1.13353
					0.960416	0.877021	0.91657	0.949266	0.927794	0.975349	0.986985	0.931674	0.905403	0.869703	0.902368	0.915948	0.917683	0.955247	0.898608	0.846465	0.907178	0.867517	0.943902	0.933446	0.945901	0.903353	0.946836	0.866982	0.89233	0.850243	0.907981	0.897964	0.924982	0.875576	0.865697	0.833054	0.897759	0.898442	0.933516	0.928378	0.939717	0.920372	0.959357	0.906354	0.95724	0.916114	0.944706	0.916375	0.878325
					1.00317	1.00281	0.987692	1.0885	1.14033	1.20146	1.26472	1.23114	1.27689	1.20927	1.28591	1.26156	1.25861	1.33456	1.34152	1.32072	1.34219	1.41381	1.40361	1.33873	1.32336	1.27495	1.25227	1.16873	1.1289	1.08329	1.05709	1.1023	1.1617	1.11264	1.11683	1.14048	1.21044	1.2032	1.15096	1.03566	1.69159			0.864755	0.845565	0.881272	0.902304	0.894416	0.942223
					0.494658	1.29477	1.20767		0.517601	0.474707	0.473834	0.492877	0.483607	0.468384	0.465093	0.500378	0.503418	0.50128	0.556707	0.5787	0.5822	0.613982	0.618855	0.640352	0.670741	0.670334	0.680792	0.730217	0.709769	0.732108	0.736873	0.769867	0.765669	0.817274	0.810613	0.821352	0.852344	0.867147	0.869539	0.883124	0.901153	0.935021	0.971413	0.991043	0.969383	0.985862	0.976583	0.994621	0.984453
					0.544101	0.537836	0.564863		0.566011	0.562946	0.56464	0.547933	0.566223	0.540044	0.531089	0.493377	0.528901	0.51781	0.50117	0.509157	0.50048	0.512621	0.498012	0.527399	0.501383	0.53793	0.547351	0.534786	0.537098	0.554785	0.549265	0.586575	0.54889	0.569488	0.546144	0.611309	0.615497	0.633362	0.623065	0.640239	0.636618	0.651404	0.673046	0.672155	0.655161	0.658845	0.661109	0.653525	0.666744
					0.644063	0.56452	0.6255		0.710842	0.742195	0.792458	0.828258	0.81163	0.804109	0.790872	0.809648	0.832815	0.793362	0.797509	0.806677	0.817516	0.801069	0.799796	0.809038	0.853665	0.887655	0.95376	1.02835	1.09182	1.0823	1.06556	1.04994	1.0612	1.03686	1.04757	1.04564	1.04339	1.04246	1.04405	1.04218	1.07285	1.04521	1.03984	1.07524	1.09543	1.14124	1.17588	1.18074	1.22926
					0.959479	0.831964	0.936706	0.966726	0.947453	0.95061	1.01545	1.08905	1.16871			1.22122	1.2145	1.27056	1.25156	1.27013	1.23837	1.25148	1.21043	1.24216	1.28171	1.28183	1.2616	1.22259	1.25623	1.29813	1.30584	1.33291	1.37408	1.3616	1.35389	1.33967	1.29826	1.29384	1.28146	1.36025	1.40118	1.38853	1.31294	1.32201	1.32811	1.35491	1.36981	1.38926	1.41569
					0.497891	0.519143	0.520209		0.534144		0.540025	0.544644	0.546024	0.605931	0.59963	0.55531	0.593729	0.610533	0.587895	0.605197	0.649211	0.641086	0.662528	0.681038	0.673446	0.65396	0.701238	0.777648	0.759349	0.744236	0.757366	0.790664	0.762095	0.737984	0.734009	0.725744	0.749952	0.742646	0.81116	0.804709	0.835171	0.95833	0.942603	0.873869	0.878582	0.912404	0.829549	0.901725	0.862253
					0.794485	0.782765	0.795321	0.768373	0.762365	0.684666	0.785143	0.823221	0.797005	0.784572	0.785409	0.768812	0.787326	0.745354	0.755792	0.729421	0.715071	0.72031	0.718382	0.737281	0.759318	0.795795	0.799086	0.822241	0.836711	0.813294	0.838136	0.929405	0.877547	0.830623	0.81955	0.838096	0.868446	0.926443	0.959537	0.930519	0.953395	0.974086	0.952979	0.975365	0.981282	0.993326	1.03954	1.06414	1.11596
						1.04121	0.963393	1.01759	0.97558	1.04067	1.00874	0.983085	1.08891	1.08087	1.05516	1.13883	1.08881	1.02316	1.06131	1.01494	1.03912	1.05535	1.04598	1.07111	1.09537	1.12788	1.18056	1.23611	1.22298	1.32102	1.34067	1.49403	1.54752	1.50544	1.52566	1.53466	1.61299	1.59482	1.62545	1.60332	1.60749	1.52372	1.50028	1.47665	1.47505	1.44056	1.40141	1.35262	1.39962
						0.698034	0.693405	0.726374	0.713574	0.739741	0.769099	0.786832	0.807764	0.795194	0.757602	0.738007	0.681397	0.783738	0.77814	0.764308	0.751529	0.766916	0.781347	0.821514	0.87575	0.861486	0.832693	0.829182	0.869907	0.941449	0.993283	1.0694	1.17163	1.19713	1.21184	1.234	1.23281	1.19271	1.17058	1.15656	1.12223	1.08781	1.08336	1.06034	0.967026	0.985698	1.03405	1.1043	1.15532
						1.01287	1.07882	1.08893	1.11351	1.1623	1.19206	1.25337	1.30313	1.31464	1.24985	1.28058	1.265	1.34639	1.2527	1.20164	1.1331	1.18277	1.13444	1.15874	1.17679	1.14457	1.10831	1.09291	1.13747	1.07842	1.11204	1.11425	1.12274	1.11956	1.16171	1.14592	1.15919	1.21409	1.18414	1.11684	1.12672	1.12492	1.20104	1.2545	1.27794	1.27301	1.28727	1.27339	1.31456
						0.827494	0.646498	0.682827	0.706209	0.666973	0.708008	0.706038	0.678166	0.724081	0.695569	0.703521	0.722624	0.736877	0.715458	0.692158	0.709062	0.750522	0.781575	0.814721	0.819841	0.849345	0.854517	0.876643	0.868104	0.897374	0.920136	0.942106	1.0007	0.983617	1.06308	1.07389	1.08412	1.12034	1.06783	1.12397	1.12626	1.30405	1.3678	1.25552	1.34503	1.27151	1.19164	1.14297	1.10825
						1.19991	1.13735	1.26523	1.2638	1.32491	1.35777	1.3455	1.3817	1.47626	1.45001	1.49878	1.36378	1.31118	1.34893	1.2865	1.27183	1.30456	1.3855	1.4015	1.2701	1.28388	1.30804	1.29376	1.30712	1.34274	1.53804	1.49158	1.55378	1.45665	1.3325	1.17979	1.06498	1.05764	1.13192	1.07309	1.11336	1.11862	1.23295	1.21473	1.24432	1.3086	1.26406	1.22859	1.23129
						0.796255	0.725548	0.827427	0.916994	0.912416	1.02171	0.940256	1.02427	1.06344	0.954883	0.914766	0.976592	1.00448	0.736176	0.90257	0.916628	0.979239	0.9511	0.775858	0.806328	0.810636	0.804549	0.842921	0.839199	0.897342	0.910075	0.914029	0.895361	0.913908	0.964207	0.931049	0.939546	0.911767	0.96966	1.0372	1.00329	0.991911	0.98266	1.01481	0.878742	1.13173	0.984663	0.928807	0.963576
						0.885094	0.946172	0.974802	0.974476	1.00406	1.0126	1.04329	1.03442	1.02016	1.08706	1.05225	1.01436	1.01293	0.974662	0.969844	1.02107	1.01693	1.03029	1.08729	1.10834	1.09602	1.06366	1.11246	1.05263	1.10084	1.11909	1.09077	1.13301	1.11356	1.10848	1.08364	1.03549	1.0605	1.10033	1.05457	1.09818	1.12145	1.02889	1.1405	1.06808	1.12053	1.18139	1.16123	1.19195
						0.714231	0.734078	0.775105	0.764515	0.77682	0.826464	0.848607	0.883397	0.887939	0.876642	0.88349	0.870895	0.883965	0.871989	0.822651	0.813802	0.802711	0.790642	0.771351	0.73065	0.785219	0.789235	0.827585	0.827839	0.807724	0.82406	0.808046	0.767551	0.780436	0.784823	0.815419	0.816531	0.822629	0.883723	0.891826	0.923607	0.935033	0.903013	0.953818	0.949122	0.946792	0.917255	0.923358	0.92388
						0.886725	0.954826	0.929294	0.994688	0.964564	1.04439	1.03563	1.06354	1.06072	1.12151	1.16516	1.17746	1.15336	1.1302	1.16882	1.16162	1.1377	1.15733	1.10695	1.0204	0.996225	0.985861	1.00093	0.997717	1.00638	0.997208	0.994074	0.976501	0.953847	0.971197	0.924535	0.975214	0.973456	0.966824	0.946984	0.979775	0.960925	0.953903	0.940937	0.949154	0.950079	0.933136	0.914977	0.995491
						1.20782	1.23712	1.34551	1.13171	1.31919	1.37191	1.22407	1.21297	1.97877	1.6568	1.68801	1.85652	1.62072	1.12279	1.12688	1.20405	1.15179	1.08335	1.23566	1.21558	1.17534	1.20472	1.21152	1.24017	1.20536	1.23164	1.19634	1.26336	1.18761	1.25943	1.30576	1.27701	1.26101	1.29422	1.44027	1.41254	1.40042	1.27505	1.29691	1.31236	1.32799	1.25436	1.23959	1.13422
						1.34617	1.21525	1.21746	1.20501	1.2887		1.38897	1.31131	1.26179	1.17414	1.28334	1.23363	1.12594	1.199	1.16709	1.22568	1.16202	1.09062	1.06209	1.0733	1.14329	1.11589	1.06034	1.05301	1.01459	1.04763	1.09689	1.0923	1.09988	1.09363	1.11217	1.15239	1.15693	1.19569	1.18862	1.22546	1.23512	1.23152	1.22246	1.17926	1.16838	1.15667	1.14571	1.17312
						0.546826	0.567654	0.578244	0.588432	0.585794	0.584218	0.582424	0.583397	0.559983	0.557999	0.526577	0.515898	0.532021	0.549118	0.526353	0.541522	0.533512	0.522248	0.530286	0.510985	0.556274	0.570555	0.577398	0.606074	0.633774	0.652983	0.686293	0.732035	0.73959	0.822748	0.781474	0.814327	0.792875	0.740567	0.723588	0.690501	0.71982	0.675693	0.675274	0.688789	0.686129	0.702888	0.743684	0.775468
						0.600539	0.623485	0.707502	0.727238	0.730027	0.713342	0.685419	0.703723	0.739843	0.795501	0.752465	0.754291	0.725847	0.685524	0.719274	0.713011	0.753432	0.790725	0.816732	0.810248	0.846777	0.853687	0.976578	1.0362	1.15785	1.18696	1.18179	1.1926	1.21957	1.27285	1.27784	1.30272	1.32341	1.28514	1.31259	1.28557	1.21455	1.2333	1.19751	1.20595	1.20634	1.14555	1.17411	1.11902
						0.783414	0.802375	0.840198	0.79104	0.810873	0.809416	0.798449	0.79058	0.773259	0.811597	0.770473	0.78651	0.782837	0.755659	0.724573	0.71346	0.708995	0.696541	0.699033	0.691012	0.671285	0.681551	0.702847	0.684658	0.695023	0.704131	0.709461	0.72958	0.724246	0.721443	0.712449	0.734831	0.749562	0.741875	0.727732	0.744128	0.759933	0.760838	0.779363	0.765725	0.804908	0.800418	0.819824	0.841041
						0.641492	0.61199	0.690531	0.64348	0.651834	0.698594	0.701843	0.712729	0.741757	0.755051	0.782154	0.702293	0.759577	0.816118	0.878683	0.89171	0.908871	0.903685	0.885879	0.820969	0.836045	0.830748	0.832929	0.827271	0.892	0.950961	0.947352	1.00723	1.1076	1.13529	1.15301	1.20762	1.27642	1.21723	1.2431	1.21962	1.30011	1.27903	1.2802	1.30486	1.28211	1.32874	1.29701	1.31032
						0.571609	0.606698	0.615805	0.632204	0.554505	0.578751	0.551514	0.600329	0.618612	0.609315	0.63748	0.720885	0.698581	0.67017	0.662228	0.704128	0.684976	0.784759	0.776387	0.761088	0.734655	0.753364	0.77738	0.791061	0.764849	0.796593	0.822853	0.818767	0.844575	0.885065	0.896023	0.939781	0.956791	0.981057	1.03843	1.09366	1.15751	1.23867	1.25846	1.28017	1.30851	1.29812	1.26207	1.24787
						0.866518	0.939053	0.954847	1.00312	1.04005	1.05171	1.03844	1.0535	1.0594	1.03537	1.05637	1.07498	1.12668	1.16538	1.21098	1.16493	1.17209	1.2178	1.14818	1.13796	1.14513	1.13702	1.11944	1.07642	1.0826	1.06047	1.1153	1.10798	1.10038	1.11084	1.16117	1.19991	1.19146	1.18249	1.25989	1.272	1.31561	1.35916	1.38462	1.36714	1.3923	1.41902	1.48518	1.56668
						0.789018	0.771722	0.775037	0.749967	0.752794	0.785254	0.758917	0.797974	0.771847	0.764876	0.776009	0.804976	0.814297	0.789155	0.762259	0.778217	0.778803	0.792873	0.823025	0.821426	0.840212	0.847441	0.855252	0.874464	0.8941	0.893996	0.906678	0.892302	0.886712	0.872477	0.882763	0.880145	0.897911	0.921507	0.952454	0.975736	0.98684	1.03539	1.03037	1.01051	0.984228	0.988952	1.01374	1.01844
						0.753768	0.693045	0.78605	0.82004	0.80374	0.871189	0.840388	0.872719	0.84973	0.898626	0.919855	0.969257	0.932282	0.929631	0.883495	0.951014	0.942937	0.970705	1.01112	1.04917	0.995343	1.01509	1.0367	1.05267	1.06861	1.06581	1.04826	0.993134	1.08178	1.06651	1.11947	1.19601	1.1406	1.17382	1.26701	1.28865	1.3961	1.40621	1.37634	1.33512	1.42689	1.3851	1.3205	1.3297
						0.459284	0.539528	0.528109	0.522341	0.542504	0.58476	0.582437	0.57089	0.602582	0.565496	0.645843	0.682548	0.680211	0.663101	0.681688	0.707088	0.734723	0.74479	0.744017	0.750151	0.740025	0.735917	0.754266	0.71291	0.706827	0.728528	0.725212	0.690929	0.721923	0.712345	0.708716	0.759568	0.756013	0.795396	0.788897	0.824822	0.866824	0.86132	0.861366	0.868183	0.842122	0.852211	0.882239	0.867428
						0.90606	0.949518	0.951577	0.931803	0.946722	0.969206	0.894507	0.875969	0.819222	0.803796	0.831894	0.84134	0.87663	0.884515	0.768171	0.759816	0.724406	0.745681	0.78833	0.855471	0.912754	0.938869	1.05128	1.06738	1.11699	1.13408	1.11866	1.0859	1.02275	1.02195	0.990601	1.02157	1.00905	0.991317	1.02779	0.98332	1.01742	0.959096	0.940656	0.992642	1.02891	1.00501	1.00338	1.11189
						0.880453	0.998642	1.01244	0.960115	0.939637	0.978261	0.977445	1.01025	0.971858	1.01168	1.02389	1.03483	1.07638	1.05564	1.08091	1.08442	1.08575	1.0883	1.16098	1.15357	1.21502	1.26377	1.17848	1.16245	1.0993	1.02224	1.00553	1.03405	1.01931	1.04363	1.0449	1.01779	1.08344	1.10648	1.01647	1.15403	1.12167	1.09283	1.20256	1.18236	1.07454	1.10321	1.05592	1.178
						0.663718	0.72275	0.729288	0.738728	0.786847	0.816872	0.858874	0.868552	0.860255	0.864741	0.848935	0.844863	0.816649	0.802105	0.783735	0.807706	0.784144	0.794799	0.808461	0.829443	0.856974	0.876661	0.904331	0.952167	0.962051	0.959006	0.93442	0.897476	0.857076	0.843079	0.831865	0.820207	0.841508	0.858474	0.871588	0.88039	0.877003	0.94137	0.936448	0.96305	0.974011	0.939569	0.910034	0.93665
						0.776762	0.827714	0.845512	0.857545	0.883101	0.873449	0.843934	0.886934	0.866124	0.886622	0.911085	0.908711	0.910659	0.871856	0.822678	0.845351	0.845831	0.870155	0.867526	0.887092	0.927326	0.910717	0.882293	0.929215	0.948927	0.917031	0.93211	0.935632	0.929319	0.909567	0.913842	0.940195	0.954907	0.954449	0.932504	0.944291	0.954391	0.98052	0.967286	0.992855	0.963729	0.943298	0.914358	0.915881
						0.667627	0.630669	0.649781	0.641803	0.645485	0.643872	0.638147	0.645081	0.629468	0.645051	0.654289	0.645018	0.639046	0.621295	0.599266	0.579737	0.595997	0.60568	0.643816	0.632337	0.634392	0.659017	0.702345	0.729269	0.726254	0.741803	0.756392	0.762851	0.715731	0.709637	0.718898	0.738742	0.727067	0.72553	0.731121	0.745879	0.783219	0.793788	0.780981	0.795353	0.783781	0.780381	0.785314	0.753322
							0.868288	0.785632	0.831117	0.784275		0.765857	0.770082	0.805558	0.829148	0.8614	0.969007	0.890733	0.852703	0.890286	0.825299	0.835077	0.810311	0.834966	0.868831	0.903282	0.861133	0.933681	0.923416	0.961344	0.964078	0.998586	1.00843	1.07984	1.12882	1.16784	1.17336	1.18356	1.30878	1.35244	1.34578	1.32721	1.39456	1.37941	1.45177	1.4537	1.50783	1.47684	1.27999
							0.496859	0.468091	0.624264	0.663219	0.658457	0.615093	0.706521	0.654847	0.652862	0.706185	0.718798	0.794992	0.805411	0.767785	0.791195	0.777244	0.778628	0.763567	0.7559	0.778916	0.784642	0.759319	0.772521	0.750035	0.729649	0.687724	0.670489	0.687756	0.730557	0.708879	0.795825	0.766754	0.798357	0.821393	0.862913	0.881375	0.931431	0.909881	0.988966	1.04586	1.10056	1.08834	1.10328
							0.901284	0.8937	0.958358	0.832065	0.956797	0.899954	1.02766	0.881534	0.955302	0.888871	0.931741	0.925377	0.906083	0.885331	0.903364	0.95529	0.955899	0.992231	0.95746	0.911699	0.900311	0.82537	0.831627	0.875369	0.844296	0.941315	0.999524	1.00062	0.959873	0.960141	0.903638	1.0157	1.02546	1.10721	1.12692	1.04319	1.05588	1.03613	1.04153	1.11911	1.0972	1.20764	1.1593
							1.05917	1.13693	1.23916	1.22555	1.24723	1.26002	1.28885	1.36191	1.3366	1.36705	1.44899	1.47776	1.43345	1.2772	1.27433	1.30811	1.34858	1.37572	1.37125	1.30865	1.36905	1.23326	1.26282	1.22003	1.2233	1.20095	1.17616	1.17455	1.18496	1.15679	1.16284	1.18327	1.26612	1.32124	1.3975	1.42777	1.53227	1.59222	1.68882	1.60182	1.67056	1.65505	1.66878
							0.742681	0.647991	0.620018	0.549101	0.596218	0.588682	0.544816	0.589387	0.551267	0.59619	0.636152	0.650272	0.645236	0.622712	0.59482	0.563816	0.567074	0.573533	0.596444	0.591068	0.601875	0.571519	0.609097	0.599013	0.625681	0.618365	0.653397	0.671347	0.686707	0.694554	0.716772	0.730609	0.703514	0.687433	0.662821	0.664242	0.660824	0.654653	0.647934	0.627819	0.666759	0.675352	0.67951
							1.60324	1.70238	1.53627	1.59683	1.66715	1.61896	1.60137	1.56589	1.53034	1.56952	1.49497	1.499	1.52022	1.38821	1.39435	1.39118	1.36854	1.35378	1.40602	1.31875	1.31015	1.32235	1.31587	1.32252	1.42278	1.41952	1.43796	1.44521	1.39936	1.46497	1.4971	1.5008	1.48152	1.44785	1.49177	1.53487	1.63193	1.53056	1.55572	1.64196	1.57568	1.57252	1.61284
							0.710183	0.712419	0.705734	0.731521	0.712771	0.720865	0.747499	0.759354	0.772123	0.778055	0.800862	0.811268	0.776769	0.802467	0.837478	0.820571	0.877039	0.854699	0.82367	0.834829	0.817148	0.8637	0.829115	0.880277	0.886596	0.895116	0.951373	0.976831	0.975804	0.939647	0.948664	0.954325	0.970566	0.928712	0.936994	0.939815	0.93463	0.949989	0.883268	0.890912	0.87638	0.868537	0.856257
							2.12267	1.90971	2.73544	2.27391	1.76006	1.71086	1.51317	1.58704	1.6705	1.58558	1.31233	1.22054	1.24454	1.20392	1.2786	1.20697	1.25523	1.25355	1.20438	1.24629	1.23899	1.37657	1.24215	1.2909	1.28215	1.305	1.23138	1.23589	1.23301	1.16212	1.2363	1.33201	1.33876	1.21379	1.24216	1.19358	1.21454	1.21286	1.26037	1.28182	1.24102	1.34241	1.24695
							0.898962	0.960637	0.938902	1.05217	1.0725	1.17209	1.15133	1.11033	1.12974	1.04053	0.953464	0.859439	0.794175	0.767866	0.771814	0.806793	0.862785	0.930659	0.952054	0.963694	1.00893	1.01343	1.02023	1.03175	1.03961	1.06128	1.04582	1.03004	1.02192	0.99205	0.963569	0.978067	1.03394	1.00272	1.01561	0.988682	1.03672	1.04491	1.05394	1.05381	1.0263	1.03077	1.03912
							0.927049	1.0201	1.05133	1.06835	1.11231	1.10222	1.1603	1.1101	1.18695	1.12435	1.15765	1.11691	1.12288	1.09359	1.06386	1.0439	1.07138	1.07426	1.10828	1.12277	1.12967	1.19768	1.19925	1.2077	1.1968	1.1989	1.17961	1.18693	1.18195	1.19272	1.23223	1.26062	1.23955	1.27382	1.25246	1.31657	1.31508	1.36739	1.40658	1.39865	1.36214	1.3978	1.42728
							0.797799	0.787114	0.820475	0.782597	0.806813	0.78504	0.799198	0.805093	0.873304	0.87048	0.85592	0.863079	0.827803	0.78318	0.799751	0.802052	0.830453	0.851132	0.871817	0.893675	0.896735	0.908099	0.942817	0.910045	0.902954	0.935626	0.929563	0.975673	0.99019	1.00915	1.02103	1.02665	1.06082	1.0505	1.02324	1.03461	1.01402	1.01867	1.01683	0.995594	0.958548	0.958296	0.954155
							1.14088	1.10293	1.10315	1.11806	1.08175	1.00935	0.982696	0.96193	0.923558	0.944063	0.897092	0.849075	0.811204	0.759167	0.73307	0.708527	0.681849	0.661399	0.652594	0.660235	0.651505	0.674275	0.682393	0.667868	0.67909	0.68503	0.709654	0.727304	0.73788	0.758987	0.761595	0.777408	0.777381	0.786514	0.783704	0.791362	0.845943	0.837643	0.851516	0.846449	0.860715	0.914854	0.944048
							0.522274	0.52918	0.535425	0.576999	0.562786	0.581023	0.588892	0.573951	0.622922	0.652543	0.637313	0.678421	0.6507	0.642626	0.613791	0.597481	0.63048	0.646677	0.594948	0.579424	0.563843	0.574766	0.559557	0.560301	0.559292	0.580453	0.605402	0.597658	0.589631	0.561891	0.564677	0.524569	0.513831	0.5141	0.495031	0.529744	0.518377	0.602345	0.637789	0.68572	0.722342	0.706418	0.671005
							0.685007	0.602961	0.566116	0.575071	0.599533	0.627326	0.642	0.680669	0.608247	0.602844	0.646007	0.64132	0.609803	0.664182	0.675299	0.737261	0.771759	0.795263	0.818569	0.811291	0.750106	0.719659	0.691746	0.62473	0.645917	0.616781	0.62228	0.589338	0.574712	0.568903	0.608666	0.606973	0.623019	0.633958	0.651794	0.649925	0.643797	0.655556	0.662071	0.639598	0.611448	0.613603	0.621029
							0.744107	0.771256	0.810051	0.763615	0.781327	0.754003	0.761305	0.821723	0.794741	0.852385	0.875012	0.952875	0.953232	0.926062	0.930796	0.913927	0.914923	0.886588	0.951361	0.901927	0.895422	0.87748	0.881075	0.92014	0.923328	0.912242	0.891719	0.914331	0.931601	0.917137	0.921227	0.920096	0.936682	0.943478	0.957721	0.959131	0.970773	0.975759	0.978125	0.981315	0.99857	0.980148	1.01946
							0.786727	0.773762	0.765499	0.802853	0.793879	0.831051	0.822989	0.833437	0.900146	0.857338	0.821174	0.799432	0.785912	0.793062	0.772134	0.776039	0.777979	0.752502	0.818965	0.860622	0.859897	0.847299	0.80497	0.724673	0.678161	0.601152	0.546721	0.575371	0.550265	0.534103	0.570885	0.559405	0.542269	0.566916	0.571628	0.572298	0.563622	0.577025	0.58978	0.595329	0.587687	0.57456	0.574952
							1.03942	1.12041	0.980454	1.038	1.01501	0.98998	1.07799	1.09829	1.12551	1.20482	1.14714	1.0151	1.03927	1.06207	0.971262	1.03067	1.07624	1.02401	1.05513	1.04321	1.07144	1.08776	1.04998	0.985799	1.02051	1.05374	1.03617	1.08602	1.01321	1.03037	1.06221	1.00368	1.06229	1.07819	1.00828	1.06977	1.0877	1.00558	1.09828	1.08481	1.10077	1.09445	1.03539
							0.920515	0.95857	0.997583	0.885037	0.941497	0.953369	0.971272	1.00833	0.975245	0.942007	0.935606	0.91625	0.891306	0.842448	0.773707	0.812057	0.795621	0.793282	0.790658	0.740658	0.721775	0.739003	0.735677	0.742113	0.763187	0.755029	0.788319	0.811744	0.858648	0.902077	0.91688	0.906526	0.917353	0.924774	0.873576	0.882428	0.911609	0.888834	0.877701	0.871519	0.888922	0.862595	0.840884
							1.55479	1.49991	1.53194	1.73958					1.4647	1.64311	1.58903	1.5902	1.56347	1.44838	1.4452	1.4527	1.44412	1.43759	1.40447	1.39079	1.50567	1.4246	1.46754	1.41341	1.45537	1.39068	1.42428	1.33017	1.39293	1.4098	1.41529	1.32942	1.4126	1.37401	1.51167	1.57827	1.58132	1.61093	1.69009	1.82065	1.8844	1.76139	1.72129
							0.910449	0.816142	0.78111			1.02405			1.14614		1.03624	1.13156	1.20398	1.23331		0.977522	1.00441	0.991685	0.857683	0.998993	0.963853	0.948742	0.982922	0.931824	0.973934	1.02945	1.1296	1.10123	1.13073	1.11107	1.11979	1.04588	1.10228	1.1303	0.992484	1.02559	1.06145	1.1521	1.09912	0.991501	1.08613	1.3488	1.14018
							0.700601	0.722207	0.731406	0.761407	0.758672	0.761262	0.748192	0.740316	0.739997	0.71506	0.755443	0.783239	0.754177	0.764494	0.768855	0.739804	0.733642	0.743088	0.781571	0.771146	0.795735	0.799206	0.82107	0.828491	0.851459	0.867177	0.892355	0.92004	0.884453	0.91217	0.905164	0.881063	0.934174	0.894895	0.88638	0.89176	0.892002	0.890918	0.871674	0.876496	0.894006	0.919024	0.948024
							0.943955	0.937424	1.01562	1.00217	1.00013	0.928163	0.862503	0.83532	0.815377	0.824282	0.856852	0.893049	0.898123	0.92436	0.959993	0.976149	0.99281	0.98403	0.988614	1.03214	0.945067	0.980187	0.976291	0.99142	0.98197	1.01632	1.01079	1.00547	1.04667	1.07095	1.10802	1.14838	1.19495	1.18935	1.16165	1.25088	1.24816	1.23625	1.24415	1.29573	1.33922	1.35448	1.36324
								0.675933	0.68221	0.856212	0.859042	0.881835	0.902736	1.01087	0.952116	1.07399	1.1513	1.14813	1.10047	1.0986	1.11236	1.11373	1.15699	1.19433	1.23024	1.27659	1.37348	1.39607	1.40613	1.39779	1.28296	1.29197	1.24195	1.27032	1.28443	1.29953	1.37683	1.38892	1.45185	1.50071	1.49538	1.4782	1.41211	1.49332	1.52386	1.60663	1.69739	1.72839	1.695
								0.590571	0.607942	0.648091	0.656409	0.663081	0.660792	0.722652	0.726207	0.718425	0.767424	0.746985	0.722686	0.755908	0.733769	0.748407	0.765584	0.792604	0.784839	0.760933	0.78664	0.764163	0.843671	0.842836	0.84558	0.870672	0.915593	0.861786	0.909636	0.942579	0.878353	0.897583	0.898406	0.906652	0.868605	0.868933	0.865599	0.855334	0.885165	0.886595	0.878818	0.936149	0.907236
								0.712937	0.638311	0.668706	0.626705	0.655249	0.681623	0.635174	0.658791	0.650176	0.688466	0.69283	0.685575	0.671842	0.651451	0.687651	0.680482	0.685565	0.686566	0.667362	0.682392	0.64039	0.677109	0.667058	0.696959	0.688816	0.698041	0.678174	0.707642	0.688533	0.702596	0.664274	0.660412	0.629663	0.625366	0.641315	0.636442	0.669944	0.654305	0.644702	0.690668	0.678076	0.675847
								0.733289	0.718767	0.732067	0.729348	0.744228	0.750017	0.745624	0.735953	0.726847	0.745511	0.753457	0.741328	0.746286	0.736502	0.744017	0.725739	0.760648	0.75837	0.788402	0.765239	0.774149	0.86293	0.895767	0.914009	0.937836	0.915233	0.886719	0.862361	0.924097	0.876146	0.892367	0.876243	0.868005	0.886333	0.952567	0.970739	0.995138	0.996404	1.00145	1.00608	0.994328	1.06804
								0.687701	0.727623	0.729982	0.725165	0.762093	0.729753	0.758432	0.779291	0.796281	0.71479	0.677423	0.690573	0.696641	0.715159	0.742239	0.815474	0.826	0.866053	0.894427	0.928642	0.913954	0.94292	0.935469	0.920749	0.882882	0.867988	0.860318	0.861156	0.870917	0.883049	0.872528	0.888853	0.910709	0.961508	0.948821	1.00027	1.08432	1.08768	1.13733	1.15894	1.08931	1.0791
								1.7881	0.881064	0.913183	0.907062	0.944658	1.02218	1.03682	1.03315	1.0524	1.08533	1.1662	1.23086	1.20457	1.22389	1.28474	1.19404	1.28459	1.19853	1.24207	1.25332	1.29334	1.20738	1.172	1.16048	1.18818	1.189	1.20326	1.18601	1.10183	1.11188	1.08389	1.14492	1.1395	1.14475	1.18872	1.15498	1.24193	1.20887	1.21229	1.25183	1.33632	1.42746
								1.14283	1.00903	1.09308	1.12465	0.977792	1.16293	1.12497	1.21506	1.14606	1.11318	1.01215	1.00851	0.966441	0.967792	1.09145	1.05883	1.04876	1.04471	1.12143	1.10052	0.997637	1.10465	1.1256	1.06613	1.07377	1.10053	1.13143	1.14743	1.12335	1.09863	1.1808	1.17107	1.34026	1.30834	1.35695	1.44349	1.34577	1.50538	1.52289	1.53473	1.61409	1.66791
								1.1156	1.14513	1.28669	1.40447	1.48983	1.57288	1.61177	1.7582	1.80899	1.72452	1.66286	1.57915	1.42821	1.27109	1.17018	1.10024	1.11409	1.15068	1.19551	1.19972	1.29458	1.27709	1.29189	1.25894	1.25217	1.25503	1.2334	1.25242	1.28778	1.32903	1.28671	1.32589	1.33806	1.35764	1.34257	1.36884	1.45177	1.3911	1.47403	1.47119	1.51151	1.48711
								1.0987	1.29061	1.35284	1.28555	1.29907	1.18626	1.26661	1.49115	1.35997	1.28469	1.15266	1.10474	1.04566	0.987332	0.998283	1.02241	1.04605	1.04773	1.04441	1.09308	1.03719	1.09173	1.0718	1.07181	1.11992	1.10721	1.14472	1.22289	1.25974	1.28872	1.29687	1.26565	1.49436	1.53168	1.64158	1.54714	1.50402	1.76064	2.13163	2.11207	1.9496	2.15549
								0.683384	0.567894	0.609179	0.723332	0.72881	0.726005	0.743746	0.663612	0.778363	0.792103	0.819378	0.801035	0.805457	0.789172	0.809289	0.791642	0.770783	0.784624	0.783827	0.749989	0.744606	0.740269	0.737328	0.749708	0.777854	0.754398	0.777226	0.777709	0.821589	0.851665	0.923255	0.950769	0.926975	0.963698	0.971407	0.996929	1.07328	1.08015	1.07132	1.0932	1.08093	1.15617
								0.994837	0.966776	1.03123	1.01531	1.09981	1.09511	0.999671	1.03409	1.09018	1.03414	1.03416	1.07706	0.938776	0.880422	0.992952	0.973627	1.05243	1.16044	1.08801	1.0632	1.18211	1.34827	1.39756	1.47064	1.58657	1.64493	1.40252	1.2689	1.39888	1.34551	1.38843	1.27875	1.37746	1.76151	1.61408	1.59607	1.65639	1.7826	1.79292	1.82968	1.94084	1.83333
								1.36446	1.7019	1.66917	1.65201	1.42433	1.79082	1.47526	1.67309	1.55418	1.35203	1.35261	1.45151	1.70525	1.58177	1.46481	1.58003	1.70532	1.78671	1.92313	1.73612	1.65827	1.58692	1.70308	1.68244	1.49357	1.41387	1.32382	1.29488	1.26956	1.32189	1.35855	1.25229	1.46586	1.26099	1.33661	1.38149	1.2727	1.22928	1.42027	1.548	1.37789	1.41189
								1.14617	1.16401			1.26798	1.28315	1.32198	1.21756	1.17696	1.1404	1.22591	1.1667	1.10667	1.12346	1.15773	1.19153	1.12201	1.14016	1.19831	1.13097	1.179	1.1972	1.24438	1.21251	1.21565	1.20819	1.23584	1.26949	1.23025	1.20589	1.23795	1.17637	1.16393	1.15924	1.06406	1.09979	1.03068	1.0368	1.08351	1.12739	1.12249	1.13023
								1.2986	1.12028	1.11885	1.25236	1.20515	1.30315	1.27501	1.2119	1.28131	1.17709	1.22482	1.23876	1.20418	1.21674	1.15511	1.26633	1.09574	1.14875	1.19238	1.26935	1.15343	1.12244	1.14785	1.14005	1.22393	1.20473	1.19486	1.18275	1.18552	1.31355	1.23262	1.2585	1.27682	1.40544	1.21034	1.24701	1.32888	1.32435	1.30267	1.27131	1.3676	1.30476
								0.643166	0.674553	0.724529	0.72372	0.734085	0.678103	0.692736	0.699894	0.685712	0.681301	0.714724	0.715529	0.691662	0.705581	0.759243	0.803216	0.772601	0.813572	0.812768	0.850273	0.842748	0.83662	0.893386	0.874748	0.858407	0.899944	0.897752	0.884559	0.885438	0.876498	0.908826	0.848814	0.844263	0.923502	0.903093	0.945502	0.956979	0.952303	0.957225	0.924952	0.962119	0.952709
								0.94339	0.997641	1.0212	1.09128	1.13318	1.08757	1.01213	0.944712	0.958463	0.959973	0.968233	0.974714	0.997831	1.01614	1.08808	1.05795	1.03344	0.991967	0.982841	0.962735	1.00451	0.99262	1.01253	1.04963	1.14545	1.2525	1.38823	1.46402	1.48442	1.47401	1.38601	1.33368	1.20704	1.10323	1.12629	1.09997	1.12499	1.12849	1.11748	1.17912	1.20163	1.19041
								0.720036	0.736883	0.702591	0.702691	0.686134	0.686918	0.704349	0.694238	0.694353	0.694751	0.700346	0.663821	0.628773	0.651182	0.629129	0.671833	0.670431	0.700006	0.734741	0.745667	0.768257	0.76474	0.78861	0.800751	0.762213	0.73212	0.706984	0.696592	0.689624	0.709534	0.70445	0.730361	0.72002	0.737064	0.776518	0.787328	0.763498	0.732342	0.759881	0.742274	0.719057	0.744623
								0.946802	0.974774	0.93456	0.970067	0.955056	0.942319	0.910681	0.936205	1.00322	1.17476	1.14035	0.751797	0.672057	0.453786	0.553154	0.665672	0.846837	1.01247	1.2719	1.33181	1.29585	1.22375	1.14033	1.02604	0.986903	1.00247	1.0139	0.997481	0.960983	0.942961	0.924785	0.863896	0.90841	0.893267	0.957539	0.937084	0.957288	0.965309	1.0224	1.04574	1.03727	1.04845
								1.51734	1.56897	1.69822	1.64844	1.73187	1.76867	1.98261		1.65298	1.63409	1.60982	1.67163	1.65716	1.58724	1.48655	1.44965	1.52392	1.52769	1.61043	1.65375	1.78337	1.87235	1.92039	1.84668	1.98702	1.94804	1.90545	1.88031	1.93557	1.94	2.03674	1.96998	2.12884	2.10357	2.16366	2.17714	2.14068	2.23469	2.2588	2.41924	2.36156	2.2918
								1.02028	0.939947	1.11757								1.20845	1.05585	1.01745	1.03243	1.05813	1.13257	1.04135	1.16485	1.12762	1.11037	1.13167	1.09683	1.07847	1.03251	1.06774	0.919747	0.965761	0.987567	1.18011	1.15966	1.15491	1.22099	1.28267	1.32214	1.41	1.1789	0.818244	1.10027	1.27873	1.19895	0.915433	0.972289
								1.21749	1.15059	1.13892	1.13492	1.14697																	0.820756	0.806918	0.800474	0.834493	0.801914	0.802175	0.835805	0.846273	0.8893	0.886209	0.890364	0.932798	0.906767	0.909237	0.940523	0.91642	0.945419	0.907629	0.966839	0.989262	0.963039
								1.14544	1.22608	1.17955				1.07257	1.16892	1.05625	1.1546			1.0853				0.832075				0.996837	0.999283	1.06678	1.06975	1.02552	1.05475	1.01586	1.05673	1.02658	1.04524	1.05592	1.04455	1.06619	1.04955	1.01129	0.989286	0.953655	0.943734	0.94032	0.968343	0.950743	0.943094
								0.78961	0.722318	0.802056	0.786443	0.809755	0.799387	0.763264	0.791774	0.824837	0.815932	0.79294	0.761949	0.770972	0.82008	0.831843	0.845031	0.85099	0.840178	0.834538	0.886264	0.869376	0.869725	0.876807	0.889091	0.890424	0.90275	0.904376	0.889532	0.89196	0.866878	0.853696	0.791968	0.740619	0.720672	0.735466	0.719378	0.714502	0.716137	0.696326	0.736518	0.707972	0.735488
									1.3267	1.42278	1.52978	1.45147	1.41245	1.34947	1.4533	1.41133	1.37239	1.42042	1.4508	1.31091	1.40804	1.35389	1.40849	1.42381	1.50919	1.46155	1.44115	1.42684					1.17222	1.09583	1.0951	1.13957	1.22169	1.40674	1.43354	1.42371	1.53499	1.55231	1.56752	1.47828	1.54398	1.48471	1.52729	1.41437	1.38789
									0.862746	0.906281	0.977727	0.952301	0.935087	0.968057	0.959205	0.897285	0.821523	0.812777	0.78448	0.769888	0.782566	0.722013	0.75172	0.764626	0.772136	0.776633	0.813786	0.781008	0.811622	0.8223	0.874046	0.912895	0.97805	1.00996	1.09171	1.10984	1.16122	1.19778	1.33813	1.39239	1.44492	1.39473	1.42032	1.47133	1.45745	1.51249	1.54043	1.64878	1.59701
									0.691279	0.74351	0.748279	0.771524	0.776666	0.76522	0.76107	0.755713	0.746058	0.731267	0.748436	0.776354	0.763199	0.786172	0.791487	0.795811	0.771091	0.787284	0.795327	0.791888	0.822441	0.842179	0.851697	0.864989	0.860111	0.875509	0.905838	0.907306	0.929263	0.913223	0.919191	0.909978	0.896898	0.886598	0.881328	0.839856	0.85072	0.913703	0.940372	0.959206	0.959496
									1.57038	1.1236	1.53306	1.71122	1.50017	1.46187	1.44984	1.43717	1.27762	1.32339	1.23956	1.22461	1.29802	1.31786	1.34529	1.27466	1.39722	1.40574	1.32607	1.29132	1.3559	1.43385	1.59482	1.59411	1.63794	1.70694	1.62294	1.74866	1.73408	1.54323	1.76544	1.69668	1.65212	1.50593	1.4724	1.41692	1.28604	1.40708	1.40363	1.2997	1.36606
									0.820558	0.881609	0.896555	0.912724	0.981413	0.967661	1.00386	0.919613	0.984921	1.02864	0.983632	0.949004	0.89834	0.91779	0.907464	0.913408	0.910301	0.912966	0.913377	0.941058	0.95836	0.991649	0.961382	0.983429	0.952608	0.959732	1.00323	0.987801	1.01993	1.04133	1.02785	1.08776	1.05845	1.08763	1.07978	1.05727	1.10748	1.07691	1.1008	1.08203	1.09998
									1.10422			1.19986	1.26286	1.29153	1.2964	1.35072	1.43491	1.42384	1.38582	1.33394	1.2468	1.19147	1.19028	1.19417	1.10064	1.05315	0.99373	0.95908	0.929136	0.869133	0.889751	0.874343	0.860886	0.862109	0.87645	0.908315	0.890599	0.917045	0.949699	0.912648	0.943004	0.962375	0.99153	0.993201	0.983214	0.986812	0.95881	0.930025	0.937338
									0.674448	0.675658	0.689982	0.719991	0.71855	0.718058	0.733697	0.748248	0.798807	0.810071	0.78819	0.828127	0.837345	0.863473	0.837299	0.821498	0.878492	0.891603	0.864263	0.891514	0.944256	0.959398	0.950488	0.92242	0.939101	0.981555	0.970368	1.00199	0.99766	0.99176	1.00272	1.03395	1.03157	1.07445	1.05475	1.0992	1.12155	1.14339	1.12077	1.10537	1.10814
									0.59781	0.592315	0.609516	0.648674	0.653819	0.642037	0.650134	0.640899	0.693967	0.658973	0.635403	0.645457	0.663249	0.645176	0.68299	0.665871	0.648891	0.690877	0.65782	0.699403	0.734448	0.727688	0.733007	0.745625	0.750218	0.753921	0.696993	0.724495	0.716143	0.736489	0.760764	0.735086	0.78904	0.787457	0.819378	0.810287	0.857552	0.873068	0.934668	0.904205	0.948941
									0.801323	0.928792	1.26217	1.16009	1.23057	1.10357	1.24673	1.21215	1.30532	1.27634	1.2608	1.24731	1.19915	1.20584	1.23376	1.18906	1.18006	1.12455	1.10146	0.985298	1.03553	0.958069	0.997467	1.0668	1.1047	1.01824	1.02484	0.975999	1.03847	0.927663	0.885282	0.867847	0.850655	0.863225	0.900129	0.921417	0.880282	0.928582	0.930988	0.863088	0.93477
										0.892775	0.937818	0.870475	0.898373	0.874106	0.844166	0.816943	0.863762	0.868106	0.832473	0.768808	0.785006	0.799091	0.792654	0.828949	0.851155	0.840291	0.808758	0.78789	0.851633	0.823916	0.801838	0.808623	0.785961	0.747184	0.787635	0.801387	0.811126	0.820887	0.839611	0.8319	0.824477	0.83238	0.833078	0.840339	0.826759	0.802725	0.803206	0.807921	0.817027
									1.17116	0.936428	0.973276	0.850478	0.826741	0.834336	0.867437	0.928348	0.912297	0.906545	0.918877	0.924227	0.902791	0.908957	0.89469	0.909946	0.892992	0.921381	0.87875	0.922017	0.886464	0.869582	0.871892	0.86113	0.862797	0.867104	0.848822	0.854198	0.869244	0.873608	0.870869	0.8971	0.950888	0.966744	1.02234	1.00096	0.979998	1.01155	0.988274	0.979583	0.973328
									0.824956	0.820146	0.897805	0.918504	0.918836	0.931141	0.896104	0.886982	0.881971	0.894853	0.847788	0.803548	0.842749	0.781096	0.80336	0.804487	0.812757	0.842369	0.853441	0.846937	0.833643	0.86224	0.885253	0.890306	0.9193	0.944667	0.948543	0.978931	0.963931	0.992327	0.97222	1.02418	1.04118	1.02596	1.05198	1.00872	1.01074	0.965151	0.955772	0.948074	0.934153
									0.668045	0.747359	0.778904	0.731484	0.832353	0.810215	0.854522	0.801258	0.787711	0.782248	0.769994	0.768879	0.777154	0.840883	0.893079	0.814147	0.825912	0.721097	0.756249	0.796458	0.804653	0.797599	0.799565	0.825245	0.826596	0.824504	0.807068	0.802805	0.787213	0.793685	0.815977	0.885296	0.890249	0.870272	0.8437	0.836073	0.791317	0.798086	0.828022	0.881204	0.806039
									3.62579	1.94917	2.56831	1.56924	1.81807	2.12625	2.29005	2.24656	1.51892	1.4962	1.9198	1.98559	1.87022	1.63193	1.46668	1.65683	1.63472	1.71592	1.89537	2.12926	2.25864	1.89346	1.62819	2.44997	2.15522	2.22785	1.33605	2.13266	2.2311	2.31016	2.11972	2.40381	2.13064	2.75397	2.10839	2.55332	1.7425	1.821	1.96169	1.69284	1.68932
									0.58634	0.602254	0.609814	0.5925	0.61466	0.659738	0.652805	0.701173	0.724535	0.751574	0.758079	0.737199	0.707638	0.713599	0.722464	0.692098	0.727962	0.721623	0.719428	0.713324	0.728115	0.72307	0.745507	0.740384	0.732824	0.727204	0.719609	0.688276	0.681599	0.679341	0.67171	0.684435	0.705866	0.716717	0.730966	0.763718	0.779806	0.808771	0.818661	0.838442	0.840736
									1.3792	1.42975	1.44172	1.32189	1.17376	1.26932	1.23949	1.14699	1.15391	1.07256	1.15206	1.11127	1.15222	1.12567	1.09268	1.11558	1.11081	1.08173	1.18297	1.09101	1.14926	1.1504	1.14023	1.097	1.0626	1.1101	1.15083	1.15158	1.15818	1.1648	1.20865	1.21294	1.22651	1.23792	1.18861	1.18251	1.20017	1.191	1.20001	1.1423	1.12146
									0.863377	0.926243	0.96281	0.938004	0.932537	0.864454	0.834449	0.738781	0.670066	0.68966	0.685692	0.677496	0.676866	0.757288	0.735501	0.724532	0.740326	0.711731	0.734378	0.789929	0.793127	0.822876	0.881314	0.896717	0.895712	0.893268	0.870016	0.874957	0.96319	1.00724	1.05226	0.971826	0.957664	0.982883	0.935847	0.919819	0.903403	0.893941	0.861563	0.86477	0.880677
									1.12412	1.03915	0.996704	0.989941	1.02156	1.01493	1.00966	0.992568	1.00525	0.948992	0.97547	0.950314	0.953217	0.971654	0.944012	1.00114	1.02144	1.02749	1.08241	1.08143	1.11006	1.08139	1.1224	1.09318	1.09847	1.03464	1.03859	1.06127	1.04164	1.07365	1.05127	1.02244	1.04987	1.08091	1.1181	1.17257	1.16635	1.20358	1.1683	1.16941	1.1644
									0.972768	0.929809	0.997232			0.875752	0.888741	0.795347	0.834346	0.807209	0.774443	0.732935	0.761184	0.78203	0.807264	0.799889	0.856368	0.896389	0.937804	0.943186	0.972709	1.00949	0.940676	0.946753	0.915959	0.908334	0.849498	0.844783	0.851379	0.856012	0.827451	0.867303	0.900702	0.919189	0.908968	0.939269	0.889266	0.890205	0.930182	0.920555	0.935596
									1.14333	1.23991	1.50747			1.20365		1.03232	1.06409	1.13177		1.2784						1.19962	1.23438	1.38449	1.54851	1.43483			1.39763	1.52351	1.42625	1.44477	1.35277	1.38409	1.38167	1.32557	1.28206	1.22922	1.24933	1.23212	1.26694	1.21838	1.22808	1.26689	1.24079
										1.85851		1.6525			2.53106	1.41306	1.79795						1.40039	1.29433	1.62629	1.54196	1.79117	1.35213	1.42253	1.56726	1.6915	1.58705	1.73039	1.78466	1.89159	2.02304	2.08766	2.29694	2.46346	2.21028	2.55284	2.9696	2.6756	2.46634	1.89517	1.77605	2.24549	2.48431	1.82856
											1.51461	1.57009	1.56992	1.48512	1.39527	1.42536	1.35491	1.22488	1.1807	1.13033	1.13504	1.14014	1.15231	1.14185	1.15957	1.1826	1.23347	1.16105	1.21255	1.22478	1.1921	1.14565	1.17092	1.17628	1.17922	1.14438	1.13855	1.14362	1.11018	1.12277	1.10684	1.07981	1.09549	1.13035	1.12359	1.14776	1.18788	1.14842	1.15489
										1.16221	1.23142	1.20744	1.21954	1.2254	1.25849	1.3511	1.28514	1.30284	1.2751	1.25399	1.24302	1.20428	1.15921	1.06539	0.972795	0.868008	0.842383	0.829654	0.867779	0.936093	0.976762	1.02156	1.01998	1.01824	1.03733	1.02331	1.06263	1.11037	1.14547	1.20382	1.18276	1.20723	1.2669	1.30729	1.316	1.23634	1.2023	1.15834	1.15614
										0.868253	0.911085	0.99289	0.952577	0.943447	0.968699	1.00117	1.08241	1.03377	1.01887	0.930199	0.93537	0.907049	0.883058	0.923077	0.931908	0.955484	0.985532	0.956688	0.973096	0.990345	1.0394	1.04588	1.04941	1.02173	1.05203	1.13152	1.17971	1.19429	1.21984	1.15883	1.14851	1.16847	1.16294	1.12529	1.18773	1.21494	1.23277	1.27645	1.35548
										0.574832	0.545544	0.570151	0.607263	0.583629	0.526187	0.595174	0.636203	0.609984	0.625326	0.571855	0.577223	0.586866	0.587251	0.613069	0.650746	0.689298	0.647511	0.64341	0.678161	0.664816	0.702828	0.723493	0.733205	0.714247	0.742306	0.751375	0.796445	0.806372	0.869272	0.826191	0.789026	0.840439	0.877658	0.873835	0.872622	0.812917	0.809603	0.825912	0.846903
										0.648252	0.738943	0.785106	0.784291	0.795712	0.789309	0.829936	0.899739	0.927939	0.967327	0.941839	0.970622	0.966967	0.962756	0.996947	1.01372	0.987895	0.968759	0.974189	0.953579	0.954567	0.953854	0.95812	0.965004	0.990566	1.01986	1.04756	1.10338	1.15262	1.16803	1.23044	1.2225	1.23327	1.26107	1.27634	1.29426	1.33828	1.32853	1.35565	1.34826
										0.564553	0.592589	0.605316	0.647189	0.621083	0.680769	0.790474	0.876049	0.891063	0.857539	0.795665	0.802815	0.725829	0.641136	0.639948	0.611917	0.670328	0.611165	0.647836	0.697663	0.639603	0.686388	0.687793	0.724555	0.69121	0.742005	0.787142	0.780608	0.807344	0.85645	0.776865	0.811368	0.800846	0.832227	0.81714	0.793733	0.807576	0.830939	0.811503	0.780548
										0.763452	0.775801	0.78387	0.755143	0.762309	0.765313	0.743782	0.762848	0.791807	0.788475	0.804264	0.808115	0.830172	0.845938	0.826072	0.827214	0.873966	0.9509	0.963606	0.961091	1.01981	1.03395	1.04652	1.10746	1.13353	1.23254	1.23629	1.40894	1.46747	1.47317	1.46499	1.42447	1.27934	1.30613	1.38523	1.46579	1.4333	1.39299	1.45396	1.45526
										1.08344	1.10092	1.1801	1.16084	1.1559	1.1169	1.12268	1.13538	1.08824	1.08947	1.15592	1.13646	1.15765	1.14722	1.16551	1.12253	1.11734	1.18813	1.24223	1.22357	1.26953	1.27761	1.2393	1.23847	1.29642	1.291	1.33729	1.43964	1.3893	1.33182	1.22671	1.20371	1.24213	1.19433	1.21268	1.22411	1.19048	1.20601	1.29141	1.13756
										1.1129	1.16021	1.14629	1.12058	1.04036	1.08107	1.07464	1.0331	1.02692	1.00942	1.00929	1.00782	1.02261	1.04396	1.09177	1.11478	1.12293	1.12041	1.08154	1.10722	1.03505	0.988808	1.00985	1.01428	1.02827	1.09253	1.14858	1.18497	1.24076	1.25035	1.25352	1.30884	1.33667	1.32258	1.36003	1.39118	1.36242	1.37417	1.39623	1.3247
										0.91718	0.920141	0.885239	0.946304	0.949806	0.884648	0.962702	1.01722	0.983453	1.00238	0.986666	0.971536	1.00568	0.972864	0.983015	0.993491	1.00461	1.00775	1.00382	1.01743	1.01302	1.015	1.01462	0.9859	0.987036	0.975357	0.988156	1.00594	1.02036	0.989095	0.966895	0.938285	0.970691	0.979762	1.0367	1.08758	1.12966	1.09589	1.11127	1.12476
										0.817594	0.850513	0.93752	0.928298	0.977214	0.989798	1.13916	1.11755	1.12313	1.14544	1.20595	1.16899	1.17634	1.20187	1.17339	1.1923	1.18404	1.14159	1.02751	0.890859	0.794585	0.830198	0.832244	0.8276	0.850609	0.840752	0.853897	0.841597	0.832267	0.861034	0.849985	0.83984	0.896633	0.918849	0.893873	0.969571	0.956004	0.944732	0.91314	0.947264
										0.918434	0.95814	0.912553	1.00755	1.03763	1.03266	1.03904	1.03856	1.00239	0.951813	0.929734	0.897685	0.891242	0.88484	0.864185	0.839118	0.825599	0.852831	0.882053	0.87907	0.890512	0.876387	0.92291	0.953243	0.93114	0.949878	0.99314	0.978049	0.956129	0.932184	0.968401	0.954482	0.976586	0.94804	0.934256	0.918682	0.929319	0.901955	0.905712	0.904437
										1.04448	1.13902	1.1678	1.1095	1.06053	1.18663	1.26367	1.14729	1.26514	1.16026	1.13654	1.07933	1.06139	1.11625	1.15754	1.1432	1.19433	1.16368	1.18977	1.20434	1.27071	1.25193	1.25516	1.23815	1.23845	1.23848	1.22738	1.25282	1.23915	1.23612	1.23717	1.23783	1.28663	1.3118	1.31104	1.29476	1.30854	1.27777	1.2919	1.25627
										1.33531	1.41809	1.46344		1.53368	1.54071	1.51381	1.50641	1.52908	1.51932	1.50971	1.50408	1.46154	1.55171	1.5441	1.55563	1.63791	1.64453	1.62694	1.63969	1.64539	1.67831	1.71342	1.68933	1.76808	1.72635	1.6651	1.62302	1.62266	1.61656	1.52241	1.45057	1.27746	1.22718	1.20993	1.25932	1.25063	1.34127	1.26592	1.263
										1.07993	1.0633	1.00238			1.06272	1.14829	1.05774	1.16273	1.11576	1.01705	1.02968	0.964203	1.10481	1.13799	1.1959	1.14988	1.19153	1.06157	1.21619	1.11175	1.12296	1.16391	1.17848	1.07744	1.11896	1.14713	1.11195	1.1102	1.2131	1.28353	1.28531	1.4346	1.32613	1.18608	1.30639	1.23618		1.19452	1.29925
										1.11702	1.17341	1.17412					1.02584	0.972418	0.938501	0.920118		0.988381	1.05813	1.0745	1.07324	1.11602	1.13605	1.17216	1.14979	1.15057	1.1683	1.13343	1.15774	1.15981	1.18492	1.1267	1.15675	1.14763	1.17252	1.16363	1.21952	1.21444	1.24912	1.22239	1.23552	1.21758	1.23616	1.25444	1.23072
										1.29645		1.29485	1.25102	1.26542	1.25728	1.26208	1.30789	1.27792	1.3256	1.28926	1.23276	1.22662	1.18978	1.17136	1.12189	1.14165	1.15205	1.16511	1.21487	1.25341	1.26774	1.26156	1.2827	1.26534	1.30199	1.23754	1.29386	1.34183	1.3645	1.42498	1.39108	1.43708	1.42531	1.39155	1.38058	1.39889	1.44153	1.43532	1.51135
											0.793312	0.741157	0.72576	0.68299	0.640882	0.617636	0.60072	0.608214	0.61531	0.595597	0.579151	0.586499	0.622624	0.62986	0.629101	0.610076	0.658613	0.651882	0.664694	0.624108	0.632955	0.615443	0.658852	0.648296	0.692272	0.711107	0.751314	0.757762	0.813611	0.843412	0.909423	0.984578	0.99472	1.02712	1.02535	1.12403	1.12738	1.07125	1.07361
											0.854014	0.842236	0.864825	0.784684	0.836215	0.866804	0.890881	0.894431	0.844743	0.851261	0.843016	0.909646	0.885493	0.870159	0.883103	0.87631	0.85686	0.867646	0.856782	0.825164	0.83012	0.827547	0.86918	0.86753	0.889198	0.89918	0.892207	0.879369	0.899964	0.915462	0.896666	0.892927	0.901373	0.898955	0.889528	0.927131	0.993454	1.01254	1.03543
											0.986648	0.973705	0.999262	1.01112	0.974461	0.998213	1.05006	1.09585	1.11167	1.09002	1.05495	1.05935	1.1873	1.06176	1.39444	1.11937	1.89037	1.24128	1.56534	1.60726	1.81872	1.30434	1.40948	1.66762	1.41066	1.41284	1.94647	1.39512	1.53828	1.49345	1.62426	1.49625	1.35204	1.40131	1.44518	1.35803	1.35527	1.26216	1.29017
											1.17326	1.12582	1.1573	1.18113		1.13509	1.17425	1.19256	1.18504	1.25121	1.19961	2.06096	1.20379	2.50994	2.03784	1.62787	1.27495	1.33791	1.29086	1.38005	1.3781	1.27466	1.24709	2.90715	1.45169	3.29063	3.0839	3.01068	2.99162	3.9925	3.55194	4.14133	3.31472	3.05709	1.96758	1.64633	1.70051	1.83378	1.78371
											0.751262	0.82233	0.891006	0.978111	1.02645	1.06568	1.13382	1.14682	1.156	1.15576	1.15283	1.2086	1.20709	1.2111	1.21121	1.17773	1.13619	1.10748	1.05879	0.966623	0.878762	0.97016	0.98424	1.04089	1.10327	1.12509	1.09408	1.16483	1.16168	1.22203	1.1983	1.16459	1.17449	1.2283	1.22908	1.20507	1.26282	1.25795	1.29904
											1.07464	1.06273	1.09025	1.14742	1.20126	1.12571	1.14002	1.12425	1.14284	0.99735	1.01616	0.98287	0.912316	1.04483	1.07427	0.992623	1.00211	1.06147	1.0977	1.03533	1.15227	1.17649	1.07318	1.22451	1.18559	1.20716	1.12649	1.13772	1.09496	1.06768	1.07995	1.14309	1.1702	1.14969	1.31144	1.26683	1.32959	1.28302	1.25758
											0.772418	0.838755	0.841967	0.830621	0.821731	0.823173	0.842354	0.82882	0.760066	0.758601	0.759684	0.749934	0.754531	0.756886	0.789588	0.791304	0.826	0.830938	0.824638	0.802723	0.77786	0.796078	0.814876	0.806978	0.830445	0.809228	0.799323	0.811589	0.808816	0.814857	0.825295	0.845308	0.860476	0.877625	0.892693	0.895582	0.927441	0.9476	0.947586
											0.737389	0.692715	0.695804	0.685456	0.696676	0.681437	0.702442	0.719619	0.71358	0.738443	0.742521	0.779346	0.809728	0.833023	0.821357	0.812067	0.793966	0.777083	0.781915	0.750103	0.751912	0.759811	0.767361	0.78507	0.827527	0.826624	0.868252	0.85195	0.837288	0.899369	0.888668	0.851457	0.780903	0.810786	0.796296	0.814599	0.802984	0.784187	0.792111
											1.12868	1.12801	1.13746	1.10902	1.17683	1.23243	1.30927	1.37521	1.36929	1.39055	1.3701	1.41926	1.32201	1.3445	1.31606	1.21437	1.16646	1.09644	1.18242	1.17261	1.0865	1.04447	1.10544	1.13296	1.2281	1.24247	1.30234	1.35808	1.36146	1.40438	1.4309	1.4849	1.44101	1.50951	1.46098	1.46797	1.46895	1.47298	1.42167
											1.31861	1.42861	1.14509	1.19188	1.22343	1.17023	1.08502	1.18002	1.06046	1.09152	1.11571	1.12753	1.02901	1.20498	1.18292	1.25007	1.19776	1.17006	1.08607	1.09929	1.10687	1.04296	1.08551	1.08822	1.16686	1.15944	1.22138	1.20446	1.18803	1.1328	1.18593	1.12848	1.24853	1.10841	1.2308	1.21886	1.14304	1.20073	1.1845
											0.538244	0.527336	0.557615	0.558417	0.555192	0.574947	0.549324	0.565012	0.561047	0.581693	0.556433	0.585735	0.563791	0.575249	0.580831	0.593413	0.576125	0.583376	0.554465	0.566906	0.591682	0.596595	0.605468	0.607788	0.629245	0.629716	0.642616	0.631271	0.64405	0.639657	0.640619	0.667468	0.669798	0.696572	0.692356	0.708105	0.734307	0.73995	0.749904
											1.31103	1.31835	1.31116	1.26151	1.25438	1.1722	1.08936	0.999964	0.996297	0.924967	0.896846	0.926186	0.961246	0.937977	0.98199	0.998805	0.960879	1.04789	1.06179	1.04811	1.09233	1.05511	1.03394	1.07809	1.05568	1.0175	1.0431	1.02226	1.04726	1.08041	1.06281	1.00926	1.01407	0.993499	0.952889	0.936209	0.952999	0.897155	0.923162
											0.945979	0.929776	0.938325	0.932383	0.91198	0.981766	1.00625	0.997587	1.0253	1.03548	1.01827	1.0393	1.06629	1.09918	1.13163	1.18545	1.18615	1.2008	1.21086	1.21277	1.15474	1.10518	1.09231	1.0817	1.06812	1.10623	1.12735	1.17124	1.17682	1.19788	1.28336	1.3162	1.35923	1.41316	1.40847	1.42968	1.41752	1.40558	1.39371
											0.873079	0.901281	0.890758	0.282413			0.927853		1.25329	1.29881	1.15371	0.916019	1.08499	1.02108	1.16463	1.0538	1.26249	1.37791	1.21111	1.09395	1.16009	1.06355	0.986904	1.04296	1.02663	1.11292	1.0286	1.07302	1.0098	1.00313	0.980734	0.955611	1.10536	0.982335	1.04852	1.12704	1.16588	1.063	1.17042
											0.712411	0.720671	0.741901	0.697905					0.856751	0.806541	0.802027	0.7902	0.84204	0.852155	0.838318	0.815671	0.820689	0.822804	0.823146	0.808503	0.820661	0.833808	0.803378	0.83049	0.873552	0.898846	0.938378	0.996336	0.981669	1.00771	1.02498	1.02047	1.05938	1.04795	1.14423	1.13837	1.1835	1.21293	1.25223
												1.96393	1.63614	1.55358	1.40355	1.44897	1.32183	1.28001	1.39862	1.52867	1.46293	1.51873	1.47492	1.58522	1.44961	1.6024	1.59911	1.716	1.62534	1.58132	1.50696	1.60837	1.48111	1.35899	1.46061	1.49645	1.4274	1.47796	1.35098	1.3096	1.40115	1.39303	1.3547	1.43171	1.45235	1.4652	1.36611	1.35527	1.295
												0.906869	0.847747	0.86548	0.855794	0.844847	0.846653	0.833227	0.826861	0.817817	0.800711	0.783707	0.772289	0.770583	0.761761	0.756702	0.782899	0.815217	0.800937	0.841102	0.899691	0.884618	0.893122	0.916129	0.939155	0.967327	0.999973	1.01747	1.03025	1.03293	1.03125	1.01539	0.988624	0.931345	0.958797	0.916652	0.905442	0.903774	0.878839
												1.10986	1.02219	1.06498	1.10507	1.1035	1.12654	1.08004	1.0525	0.991853	0.99165	1.01241	1.06387	1.05499	1.08228	1.16294	1.19549	1.23252	1.269	1.30437	1.22505	1.2582	1.24436	1.22418	1.18251	1.16383	1.1852	1.10179	1.08612	1.0673	1.05653	1.04856	0.987011	0.976791	0.9524	0.954206	0.923431	0.939041	0.924149
												0.748118	0.791357	0.840375		0.882268	0.995318	0.993352	1.02486	0.976261	1.02217	1.06526	1.03139	1.04195	1.05421	1.08894	1.06666	1.06104	1.06649	1.15399	1.09516	1.13179	1.08817	1.11359	1.16463	1.17193	1.2017	1.14365	1.15493	1.1677	1.20756	1.19545	1.23133	1.25703	1.20295	1.19884	1.16901	1.0635	1.00624
												0.856365	0.875602	1.02223	0.939617	1.01599	0.944528	0.942484	0.861129	0.929113	0.872959	0.872869	0.868649	0.906585	0.884715	0.868498	0.913364	0.90628	0.890715	0.929573	0.921488	0.98927	1.00538	1.04268	1.11387	1.07308	1.04817	1.05942	1.14244	1.13811	1.17542	1.0823	1.15959	1.1356	1.08964	1.15255	1.06696	1.085	1.06948
												1.04365	1.08514	0.929981	0.968462	0.913722	0.912692	0.896369	0.790432	0.813827	0.864259	0.893562	0.849616	0.908568	0.912413	0.901755	0.938566	0.948283	1.01565	1.06072	1.08371	1.04714	1.09792	1.07115	1.1384	1.09275	1.00762	1.09449	1.04382	1.132	1.17042	1.187	1.10588	1.02825	1.01302	1.05507	0.992914	1.03951	1.04115
												0.930068	0.945036	0.941444	0.962047	1.05364	1.10672	1.1126	1.04031			0.991538	1.00007	0.920281	0.92291	0.937501	0.902144	0.901866	0.935794	0.952797	0.960532	0.894606	0.956615	0.971628	0.967495	0.972001	0.974291	0.994249	1.01542	0.978239	0.975529	0.966028	0.94041	0.916597	0.940923	0.961216	0.926317	0.94414	0.951723
												0.741866	0.784379	0.755874	0.82159	0.798619	0.812895	0.812069	0.826248	0.774526	0.775764	0.831972	0.845253	0.865318	0.885574	0.875349	0.873585	0.871641	0.908433	0.895874	0.911954	0.897609	0.873583	0.841808	0.891063	0.883982	0.866796	0.870085	0.955481	0.957569	1.01378	1.02881	1.04359	1.07399	1.06828	1.07751	1.04192	1.04296	1.07046
												0.840068	0.909969	0.82997	0.767818	0.880301	0.734753	0.672409	0.648338	0.691133	0.768534	0.714878	0.692677	0.718037	0.737556	0.750166	0.786055	0.78852	0.806264	0.799294	0.825662	0.809153	0.821662	0.81838	0.850672	0.817728	0.847841	0.865462	0.859329	0.88057	0.875904	0.885888	0.865134	0.840167	0.822352	0.865761	0.87496	0.900152	0.907741
												0.505937	0.492497	0.547181		0.566695	0.617472	0.648596	0.609677	0.573815	0.646614	0.612605	0.616577	0.576634	0.635535	0.592481	0.519196	0.557616	0.528398	0.528343	0.545265	0.517398	0.507346	0.553174	0.592355	0.632355	0.647595	0.72195	0.72531	0.787575	0.840502	0.885778	0.865274	0.882841	0.94514	0.966656	0.93888	0.954509	0.980645
												1.03772	0.988837	1.02238	0.92047	0.938575	0.896799	0.991809	0.962515	0.920978	0.861661	0.878586	0.881689	0.965392	0.906365	0.980216	1.06202	0.940939	1.10109	1.13961	0.977589	1.12102	1.00711	1.01997	1.05	1.16338	1.02243	1.169	0.988267	0.982363	0.968087	0.896442	0.919396	1.01455	1.08818	1.04159	1.0448	1.15364	1.0802
													0.597733	0.594994	0.58926	0.57589	0.649501	0.6627	0.668407	0.617663	0.605947	0.585592	0.555939	0.578985	0.545174	0.546218	0.581299	0.565902	0.59731	0.596214	0.590467	0.591443	0.603378	0.594592	0.584912	0.515574	0.579632	0.573285	0.548005	0.503718	0.57896	0.601829	0.598246	0.628972	0.604762	0.622596	0.602437	0.621298	0.610165
													1.06279	1.04312	1.08308	1.14234	1.17949	1.14552	1.09377	1.08269	1.10134	1.05902	1.08555	1.01618	1.08274	1.02184	1.0309	0.987011	0.956183	0.989487	1.01289	1.00715	1.08118	1.05153	1.07789	1.06168	1.07529	1.10985	1.07547	1.13394	1.08726	1.09867	1.13774	1.19541	1.146	1.06082	1.14352	1.09379	1.05473
													1.09544	1.13026	1.15871	1.25047	1.32725	1.3344	1.31732	1.27857	1.36505	1.34004	1.341	1.32828	1.38199	1.44881	1.46964	1.49186	1.41176	1.42504	1.452	1.40178	1.45502	1.47573	1.47118	1.50027	1.4754	1.49753	1.4742	1.52075	1.50256	1.52418	1.5077	1.50812	1.53702	1.52575	1.52449	1.49089	1.5906
													0.74901	0.750912	0.782111	0.804802	0.771308	0.765321	0.747517	0.751206	0.742077	0.749281	0.749182	0.800836	0.799807	0.797927	0.802761	0.803879	0.809443	0.808368	0.81131	0.832637	0.83336	0.840952	0.854744	0.837136	0.878111	0.924771	0.919438	0.965284	1.00973	1.01941	1.03439	1.01571	1.04332	1.00781	1.02543	1.02995	1.02171
													0.725388	0.732597	0.712623		0.654186	0.715317	0.725432	0.727227	0.73963	0.763724	0.758958	0.805515	0.836587	0.916922	0.86266	0.857335	0.900573	0.963226	0.909508	0.990189	1.03271	1.00988	1.02051	0.999641	1.06811	1.09677	1.1427	1.0592	1.13974	1.17277	1.20057	1.27221	1.38129	1.49436	1.59751	1.66757	1.72266
													0.947116	0.895417	0.949146	0.967601	1.03346	1.00339	1.02446	1.07507	1.00762	1.08002	1.11774	1.10398	1.19354	1.16626	1.22526	1.2074	1.22147	1.2169	1.21527	1.22659	1.22318	1.19688	1.16381	1.15757	1.1629	1.1811	1.19974	1.21344	1.1752	1.15173	1.14747	1.11441	1.1034	1.10173	1.15002	1.14201	1.15596
														1.16174	1.15029	1.20718	1.06869	1.17107	1.27787	1.17559	1.2268	1.28066	1.17387	1.11134	1.13546	1.13644	1.08469	1.16394	1.17617	1.20257	1.21569	1.22642	1.19693	1.20304	1.25912	1.24171	1.2349	1.2462	1.24751	1.17454	1.17984	1.2311	1.23088	1.2622	1.14988	1.13268	1.20871	1.23178	1.18671
														1.12889	1.12743	1.1928	1.21484	1.19622	1.26135	1.2252	1.19432	1.16329	1.11453	1.04837	0.991438	1.02167	1.05383	1.0456	1.04479	1.06857	1.02292	1.02029	1.03803	1.08756	1.13728	1.09745	1.05385	1.038	1.07983	1.08327	1.12461	1.09629	1.11028	1.14219	1.17119	1.2559	1.27032	1.33212	1.33685
														1.05114	1.0111	1.10276	1.06391	1.06922	1.0772	1.07543	1.10063	1.06992	0.927689	0.984147	1.04708	1.14599	1.1779	1.27792	1.32741	1.30192	1.24438	1.25015	1.23783	1.22273	1.25646	1.34667	1.33923	1.3295	1.26436	1.40077	1.29791	1.40262	1.48125	1.53105	1.68876	1.79705	1.61397	1.55488	1.57242
														0.749447	0.755699	0.792408	0.741253	0.76261	0.733256	0.749051	0.803099	0.835296	0.855688	0.892647	0.888677	0.874418	0.897508	0.864422	0.890951	0.888017	0.900117	0.942579	0.976604	1.01628	1.07482	1.16832	1.23676	1.23065	1.34182	1.39285	1.37631	1.38666	1.38855	1.33387	1.34424	1.31522	1.31656	1.29351	1.26908
															0.80568	0.806794	0.888687	0.878169	0.852192	0.860183	0.862458	0.908754	0.955855	1.0095					0.735734	0.735789	0.697	0.71726					0.647927	0.625855	0.649775	0.641342	0.679215	0.717527	0.726574	0.713937	0.732618	0.801625	0.861145	0.919936	0.955856
															0.644093	0.69857	0.738808	0.724092	0.783275	0.77549	0.893074	1.05499	0.98185	0.922884	0.9534	1.06418	1.10845	1.13841	1.18226	1.03754	0.914206	0.882948	0.851212	0.797582	0.795532	0.860132	0.92582	1.07504	1.08539	1.22797	1.15069	1.1059	1.0012	0.955679	0.962764	1.03291	1.02045	1.05175	1.0756
															0.659556	0.648624	0.644804	0.619836	0.611482	0.619303	0.609117	0.625128	0.613471	0.607431	0.634977	0.653136	0.653909	0.69899	0.705649	0.750749	0.73762	0.779551	0.782583	0.8033	0.811959	0.820692	0.829255	0.853001	0.844659	0.850796	0.863127	0.865352	0.866676	0.869476	0.843499	0.858597	0.851669	0.865008	0.857647
															1.61553	1.57677	1.46227	1.37561	1.63963	1.69255	1.41959	1.44746	1.48162	1.76186	1.72135	2.33423	2.9343	1.82551	1.91376	1.84703	1.73041	1.6748	1.59576	1.75436	1.78354	1.84268	1.63631	1.50158	1.58087	1.54213	1.52712	1.50702	1.52372	1.41074	1.37958	1.31905	1.28033	1.27767	1.28788
															0.937575	0.986801	0.939923	0.908164	0.945111	0.933039	0.944937	1.0365	1.01224	1.0961	1.16166	1.23279	1.23256	1.20685	1.15834	1.16138	1.12137	1.14912	1.10591	1.10398	1.14634	1.19649	1.24454	1.25359	1.31542	1.34348	1.34575	1.42562	1.51372	1.46646	1.43628	1.41431	1.45528	1.50395	1.5263
															1.12302	1.07555	1.10407	1.11334	1.14638	1.12585	1.09658	1.11523	1.14716	1.15802	1.18795	1.21508	1.25894	1.24919	1.2823	1.29863	1.33398	1.38499	1.41504	1.43774	1.44014	1.45289	1.46353	1.45499	1.40723	1.40354	1.37298	1.34284	1.39397	1.4244	1.44329	1.4739	1.52991	1.52286	1.4942
															1.00167	1.05265	1.09901	1.13969	1.14189	1.10873	1.16043	1.18074	1.17956	1.19424	1.18687	1.19991	1.15718	1.15809	1.10595	1.09457	1.11834	1.12494	1.11896	1.08638	1.11767	1.12078	1.07462	1.07191	1.09275	1.10838	1.12336	1.15971	1.20088	1.18502	1.22157	1.18569	1.21792	1.17613	1.19757
															0.577926	0.600441	0.621919	0.622837	0.620985	0.629866	0.629192	0.662597	0.689516	0.719217	0.739247	0.787396	0.866177	0.907966	0.933356	0.917708	0.950506	0.962148	1.00656	1.0189	0.973715	0.964948	0.933087	0.933009	0.985885	1.02063	1.05867	1.12655	1.15176	1.13651	1.18935	1.10892	1.03795	1.02372	0.977774
															1.04958	0.998587	0.801113	0.948287	0.84299	0.858465	0.855966	0.815313	0.826084	0.843573	0.830749	0.828718	0.828043	0.821119	0.852168	0.835372	0.796517	0.832588	0.810183	0.826793	0.797407	0.795829	0.798436	0.811899	0.792701	0.818276	0.854377	0.863607	0.852868	0.889307	0.880601	0.886217	0.852243	0.888685	0.877062
															1.41097	1.35927	1.37009						1.03323	1.02345	0.979665	0.904713	0.87937	0.874981	0.882859	0.876166	0.863841	0.869256	0.841848	0.840717	0.86984	0.823013	0.840057	0.815861	0.751024	0.68195	0.654413	0.640017	0.584285	0.574499	0.566691	0.545376	0.532746	0.514299	0.524689
															0.629753	0.639072	0.640969	0.647027	0.609041	0.591744	0.5953	0.586562	0.602966		0.645415	0.618841	0.627491	0.644789	0.60926	0.632772	0.601727	0.553578	0.557106	0.581245	0.579252	0.647746	0.64795	0.680153	0.764733	0.791219	0.774727	0.748977	0.752827	0.780589	0.745254	0.773774	0.760917	0.790411	0.845026
															0.884015	0.822521	0.871572	0.855166	0.846253	0.759898	0.735452	0.770154	0.788227	0.776193	0.798637	0.816738	0.819687	0.854973	0.880222	0.959085	0.905319	0.870834	0.85444	0.810196	0.678027	0.725859	0.727761	0.7371	0.887085	0.825943	0.71753	0.972572	0.910984	0.980176	1.03413	0.608761	0.861041		0.846287
																1.4988	1.42051	1.32647	1.57362	1.44479	1.32521	1.44976	1.36838	1.28376	1.20964	1.12397	1.12594	1.18803	1.22017	1.15459	1.24196	1.20265	1.29297	1.38656	1.48791	1.56917	1.5049	1.55031	1.4494	1.37787	1.39049	1.28425	1.32586	1.27901	1.25323	1.13563	1.16435	1.09376	1.20109
																0.657195	0.661031	0.637049	0.661706	0.634439	0.610634	0.593158	0.605959	0.603281	0.606968	0.615945	0.573863	0.564337	0.556854	0.562195	0.549011	0.535607	0.568396	0.546554	0.587719	0.580092	0.622739	0.626108	0.657853	0.673983	0.68319	0.696627	0.685773	0.677074	0.687095	0.733264	0.782032	0.778704	0.785256
																0.966521		0.965628	0.937193	0.866034	0.88024	0.859777	0.828617	0.813758	0.810148	0.811481	0.881465	0.825822	0.815349	0.819231	0.832262	0.84582	0.857092	0.867327	0.858441	0.857637	0.850494	0.860395	0.847784	0.83126	0.829369	0.832081	0.863461	0.841869	0.872671	0.870145	0.913806	0.900616	0.917837
																0.865992	0.83757	0.876443	0.863944	0.846384	0.846015	0.842493	0.825798	0.813344	0.805771	0.784862	0.79795	0.806037	0.796696	0.808719	0.786278	0.799693	0.796432	0.827476	0.852621	0.873022	0.862617	0.863543	0.897193	0.942968	0.945068	0.974645	0.978923	1.02234	1.0043	1.01926	1.05291	1.02884	1.00147
																0.764961	0.756498	0.783473	0.76156	0.746559	0.751212	0.774035	0.80385	0.786932	0.788314	0.801399	0.822694	0.835176	0.807948	0.807587	0.83743	0.812151	0.812236	0.800733	0.820565	0.824898	0.819098	0.797919	0.773932	0.748517	0.761173	0.769744	0.77637	0.777248	0.794677	0.822433	0.804955	0.802916	0.801547
																1.3178	1.34164	1.27796	1.29317	1.258	1.2406	1.26504	1.2688	1.32086	1.40855	1.49817	1.56761	1.65536	1.6845	1.75885	1.76231	1.83889	1.86679	1.89407	1.9795	1.96746	2.11326	2.09121	2.11658	2.06106	2.03121	2.02466	1.92884	1.84251	1.70774	1.66057	1.63989	1.64113	1.61825
																1.17889	1.12367	1.12788	1.13591	1.15036	1.22711	1.25495	1.1289	1.16101	1.12646	1.20291	1.31489	1.28367	1.21347	1.24618	1.30606	1.22802	1.19411	1.18746	1.32851	1.35681	1.28681	1.30827	1.39728	1.28708	1.44924	1.22811	1.20685	1.33328	1.30323	1.37014	1.2869	1.22461	1.20161
																1.1281	1.17738	1.13491	1.21571	1.13744	1.13955	1.12369	1.17539	1.14622	1.12498	1.07109	1.04797	1.04312	1.02343	1.07106	1.12856	1.17353	1.24321	1.25786	1.23967	1.23575	1.30561	1.29104	1.29797	1.39147	1.40357	1.49907	1.5493	1.59011	1.65232	1.66159	1.66411	1.61984	1.58271
																0.937925	0.940107	0.94291	0.929744	0.941504	0.888495	0.87455	0.915131	0.904252	0.950279	0.917706	0.92083	0.908599	0.921224	0.913817	0.924008	0.949247	0.928619	0.987094	1.02698	0.99075	0.984683	0.949054	0.997982	0.994198	1.04941	1.01678	1.07302	1.04378	1.0555	1.06042	1.06742	1.12511	1.13274
																0.790977	0.758643	0.79806	0.747622	0.7985	0.735602	0.720417	0.657199	0.675138	0.677415	0.682174	0.641065	0.649302	0.66285	0.659905	0.667531	0.686364	0.702375	0.724472	0.728445	0.732506	0.748196	0.735952	0.740541	0.750613	0.769853	0.771966	0.778609	0.814708	0.817993	0.833267	0.827977	0.831435	0.813617
																0.986099	0.967548	0.935747	0.900923	0.932206	0.888434	0.934051	0.892275	0.944896	0.914441	0.940916	0.937817	0.919809	0.949882	1.04205	1.05393	1.12315	1.11792	1.08702	1.12993	1.07724	1.06727	1.12204	1.11561	1.10132	1.15432	1.17155	1.14175	1.17729	1.22092	1.25537	1.22196	1.19089	1.28145
																0.714377	0.730556	0.7229		0.651843	0.707275	0.682346	0.723611	0.737227	0.747638	0.741941	0.700672	0.728419	0.768629	0.752129	0.763981	0.746364	0.737877	0.750098	0.735173	0.741593	0.756523	0.745233	0.704588	0.735234	0.727808	0.719227	0.736641	0.715325	0.730319	0.683005	0.693312	0.704691	0.703221
																0.827931	0.842517	0.875023	0.849554	0.785448	0.817363	0.823812	0.861684	0.868041	0.872614	0.861321	0.859626	0.839364	0.829357	0.83255	0.828743	0.839467	0.887534	0.927863	0.922861	1.00112	1.02333	1.11812	1.11551	1.10601	1.07582	1.11399	1.12799	1.13774	1.13976	1.15061	1.1548	1.14813	1.17577
																0.555084	0.595321	0.686161	0.65715		0.617958	0.578527	0.558124	0.726964	0.692262	0.677022		0.721124	0.74232	0.747697	0.746162	0.830494	0.828101	0.854482	0.856051	0.85931	0.852078	0.850419	0.856885	0.855471	0.944174	0.898619	0.8848	0.887255	0.876616	0.850872	0.89386	0.876353	0.873191
																	1.54321	1.58637	1.49757	1.50144	1.60885	1.43388	1.57741	1.55889	1.37646	1.53197	1.41872	1.5768	1.3394	1.37332	1.44389	1.46698	1.32973	1.54023	1.39308	1.32542	1.30914	1.26589	1.18998	1.19207	1.26831	1.14869	1.24401	1.23592	1.19004	1.17377	1.13379	1.31735	1.33022
																	0.788191	0.774122	0.783769	0.779148	0.814533	0.778128	0.784075	0.778778	0.808154	0.807158	0.802918	0.842183	0.798356	0.833313	0.804413	0.840545	0.831453	0.846374	0.894622	0.91388	0.906757	0.894046	0.918436	0.924391	0.921429	0.914704	0.912068	0.900991	0.888407	0.85846	0.845339	0.856645	0.845623
																	0.970022	0.846399	0.817079	0.815396		0.800747	0.788739	0.822311	0.87903	0.895833	0.995451	0.973577	0.971	0.977574	0.984207	1.13609	1.08367	1.09965	0.952775	1.02027	1.01762	0.973589	1.03419	1.08725	1.1156	1.04359	1.16337	1.2257	1.23119	1.31292	1.20484	1.14805	1.24812
																	0.602744	0.651697	0.693084			0.65006	0.638702	0.654606	0.691901	0.697751	0.741791		0.739806	0.780435	0.782603	0.770726	0.766416	0.728467	0.755477	0.784619	0.784421	0.78475	0.775091	0.792519	0.779678	0.819401	0.793967	0.784143	0.791476	0.787928	0.816678	0.815299	0.789242
																	1.25526	1.31846	1.27838	1.46904	1.27401	1.31526	1.40392	1.3658	1.43779	1.34437	1.26343	1.30051	1.18821	1.17826	1.32852	1.33962	1.35515	1.32973	1.42576	1.62361	1.99567	1.5675	1.59972	1.77371	1.68851	1.57847	1.83315	1.96438	2.41058	1.86358	2.01295	2.26071	2.20257
																			1.37708	1.33512	1.22323	1.29066	1.25381	1.32285	1.30027	1.27625	1.36829	1.35498	1.30293	1.22275	1.2001	1.28578	1.27832	1.22262	1.25578	1.30429	1.28526	1.36703	1.34889	1.44176	1.51337	1.51051	1.65156	1.61132	1.67954	1.65173	1.65872	1.59072	1.59893
																			1.1831	1.11971	1.21382	1.16814	1.16105	1.14975	1.1979	1.13519	1.16359	1.21932	1.23044	1.24113	1.27173	1.28288	1.29555	1.41859	1.44159	1.43229	1.49559	1.55406	1.53221	1.57207	1.61398	1.59267	1.59161	1.64389	1.66058	1.63297	1.62412	1.54834	1.58941
																			0.927836	0.896126	0.876545	0.917485	0.890819	0.894177	0.901259	0.903419	0.908154	0.887249	0.902246	0.866647	0.869917	0.856646	0.83712	0.810754	0.827126	0.810352	0.830197	0.83877	0.851333	0.845713	0.847216	0.851054	0.815055	0.837969	0.842723	0.831913	0.837428	0.855557	0.876918
																			1.05505	1.14674	1.08316	0.882411	1.08471	1.13803	1.08315	1.10941	1.10103	1.15682	1.15477	1.08484	1.14867	1.16485	1.17908	1.14797	1.22049	1.17654	1.20169	1.24036	1.23858	1.28729	1.32477	1.31403	1.3193	1.30633	1.27796	1.28365	1.33957	1.36654	1.33481
																			0.998895	0.820996	1.11432		1.02963	0.880149	0.848278	0.888955	0.881259	0.891871	0.88725	0.938673	0.906956	0.921116	0.934638	0.958334	0.966488	0.99134	1.00116	1.04914	1.02793	1.07803	1.03722	1.02047	1.02074	1.02498	1.05163	1.06306	1.06668	1.04494	1.06728
																			0.978697	0.939871	0.980493	0.979036	1.01656	1.05714	1.12979	1.1263	1.19607	1.2072	1.15854	1.13265	1.13972	1.14239	1.09374	1.18824				1.08853	1.05921	1.05	1.09072	1.04808	1.07564	1.05154	1.04074	1.00059	0.939547	0.965727	0.98396
																				0.585289	0.613657	0.577868	0.524687	0.531327	0.550839	0.55236	0.569528	0.552081	0.571317	0.586633	0.585787	0.551392	0.559705	0.563697	0.605236	0.591093	0.574366	0.615852	0.578	0.617213	0.612152	0.586399	0.583338	0.609099	0.653421	0.68562	0.720259	0.731562	0.724556
																				1.02185	0.966774	0.921279	0.900559	1.04457		0.951153	0.965561	0.958494	0.962787	0.991949	0.974555	1.01209	0.970907	1.00359	0.976473	1.0401	1.06013	1.02721	1.13846	1.11149	1.0903	1.1684	1.09771	1.13959	1.15847	1.16224	1.12158	1.14368	1.04053
																				0.423732	0.460605	0.463446	0.450874	0.474824	0.496948	0.452801	0.458467	0.454372	0.477945	0.49078	0.489376	0.474461	0.480811	0.481326	0.460974	0.47084	0.481004	0.501314	0.504998	0.479699	0.501542	0.510656	0.513123	0.509517	0.506341	0.54906	0.541066	0.539348	0.537484
																					0.64847	0.721121	0.669616	0.659496	0.60933	0.559109	0.562718		0.549083	0.598373	0.652011	0.614256	0.793289	0.555816	0.554936	0.6183	0.737266	0.618121	0.657186	0.626959	0.576993	0.614625	0.617975	0.581878	0.590729	0.590306	0.597476	0.624367	0.647
																					0.694247	0.768118	0.754878	0.802163	0.835358	0.816052	0.827382	0.832602	0.808982	0.810856	0.783414	0.801752	0.795132	0.803039	0.826774	0.791986	0.842759	0.877792	0.849577	0.88421	0.83362	0.804083	0.82155	0.815272	0.817249	0.88088	0.830004	0.864404	0.836524
																						1.17548	0.912278	1.23413	0.83582	1.0938	1.28972	1.29239	1.27524			1.32576	1.31418	1.2779	1.21599	1.19953	1.16865	1.15658	1.14556	1.14451	1.17419	1.11974	1.15047	1.13811	1.13699	1.13496	1.14641	1.11654	1.15105
																						0.736733	0.738436	0.817773		0.790152	0.870158	0.954138		1.00326	1.08453	0.98879	1.00945	1.02832	1.05409	1.12403	1.11624	1.15748	1.21178	1.27109	1.19862	1.23956	1.1996	1.19974	1.14872	1.15011	1.18523	1.18343	1.20046
																						0.679893	0.725715	0.79847		0.596142	0.542831	0.635472	0.644664	0.603681	0.713463	0.599481	0.655354	0.67611	0.64049	0.655651	0.611659	0.736795	0.620634	0.789185	0.693034	0.696839	0.823813	0.828392	0.829547	0.687339	0.731307	0.82931	0.809335
																							0.574155	0.541197	0.522312	0.543127	0.532931	0.538524	0.537184	0.512758	0.531053	0.525381	0.473536	0.519044	0.525963	0.518704	0.512853	0.520349	0.520955	0.502151	0.526976	0.508859	0.534198	0.542657	0.513737	0.54652	0.530162	0.544622	0.522246
																							1.13255	1.1464		1.10585	1.12721	1.17944	1.2311	1.13905	1.28027	1.13506	1.19838	1.07264	1.157	1.16687	1.12394	1.14922	1.05112	1.17867	1.12152	1.10025	1.15953	1.12378	1.09445	1.13612	1.06505	1.07072	1.56504
																							1.00513	0.884301	0.972528		1.24155	1.21553	1.15266	1.39425	1.24355	1.40951	1.40979	1.41593	1.45659	1.32624	1.29848	1.22054	1.27094	1.2142	1.36394	1.3368	1.39876	1.55693	1.33427	1.42834	1.56122	1.27602	1.2968
																								1.34241	1.2198	1.07698	1.08678	1.0059	1.02209	1.05823	1.09782	1.14138	1.15869	1.20984	1.2547	1.25609	1.26924	1.27658	1.29446	1.30398	1.34938	1.34563	1.33517	1.44151	1.46371	1.49095	1.49197	1.55956	1.46845
																								1.4153	1.39418	1.70544	1.36744	1.40752	1.54232	1.14468	1.48862	1.56658	0.954699	1.59786	1.65322	1.55931	1.50822	1.61434	1.54933	1.7181	1.67417	1.62858	1.66915	1.77173	1.73156	1.7392	1.65932	1.72007	1.8201
																									0.96219				1.01889	1.05385	1.0479	1.24049	1.237	1.30211	1.27217	1.31457	1.4442	1.45394	1.55629	1.62648	1.65236	1.72757	1.69	1.71427	1.73696	1.40517	1.65949	1.67693	1.6805
																										0.54111	0.606893	0.605148	0.627754	0.647012	0.645543	0.637922	0.628212	0.621832	0.608588	0.585075	0.586696	0.608929	0.611129	0.549231	0.621402	0.60776	0.630501	0.635418	0.626863	0.642445	0.651341	0.644247	0.661586
																										0.815719	0.8418	0.905163	0.91245	0.946981	0.94281	0.950389	0.977282	0.986873	0.990048	1.01923	1.05937	1.08455	1.06399	1.08755	1.07483	1.05837	1.06798	1.01708	1.02799	1.06501	1.0229	1.02865	1.00952
																										1.01071	0.960619	1.04062	1.17603	1.18813	1.29971	1.35879	1.33918	1.25763	1.3785	1.26301	1.25211	1.20481	1.25504	1.26265	1.22081	1.09381	1.21812	1.259	1.20626	1.24356	1.32895	1.18919	1.24448
																											1.15981	0.984694	1.23706	0.976578	1.30524	1.30038	1.35448	1.39816	1.43446	1.46105	1.45907	1.47541	1.43831	1.43782	1.37577	1.34851	1.32538	1.35227	1.3215	1.33826	1.3713	1.35244	1.32184
																											1.16003	1.20808	1.19645	1.11317	1.10633	1.0311	1.04955	1.02791	1.00215	0.948258	0.927162	0.901359	0.867025	0.899681	0.946196	1.00029	0.984466	0.983218	0.97167	0.95745	0.943414	0.962548	0.960117
																													0.387981				0.540608	0.521856	0.610174	0.637496	0.674261	0.684562	0.667369	0.708775	0.75339	0.771315	0.773938	0.81965	0.832619	0.853592	0.872704	0.860447	0.872634
																														1.70676	1.67655	1.5812	1.52164	1.66433	1.6584	1.54001	1.51593	1.6086	1.56385	1.52202	1.45318	1.61068	1.67391	1.72775	1.65388	1.65236	1.6335	1.63583	1.58872
																															1.28967	1.52057	1.35228	1.40082	1.38285	1.37312	1.36713	1.35625	1.35427	1.44435	1.33816	1.44813	1.32265	1.43101	1.51117	1.43259	1.38427	1.50077	1.4755
																																0.668568	0.584009	0.653161	0.613339	0.559929	0.576993	0.550412	0.533834	0.562571	0.581081	0.590723	0.605782	0.568783	0.60593	0.609064	0.575832	0.621189	0.653944
																																1.54229	1.25956	1.28755	1.28117	1.34045	1.29641	1.2426	1.27316	1.27818	1.25717	1.21792	1.24631	1.25305	1.26768	1.2657	1.24603	1.22102	1.31796
																																	1.21939	1.14767	1.30563	1.12902	1.02653	1.22413	0.968233	1.05147	0.962134	1.13453	1.05982	1.08207	1.02814	0.999653	0.97802	1.03784	0.959086
																																			2.22214	2.05434	1.99088
																																					0.616082	0.609191	0.568725	0.577874	0.570408	0.546027	0.515848	0.551144	0.525014	0.574019	0.525901	0.533727	0.526783
																																						1.20945	1.38863	1.3824	1.40414	1.41617	1.4234	1.39812	1.26743	1.31021	1.27775	1.22076	1.26724
																																						0.523729	0.603616	0.559232			0.572243	0.56033	0.61415	0.578287	0.595543	0.573171	0.553124
																																							0.529391	0.61151	0.732545	0.905036	1.14628	1.19845	1.20095	1.16711	1.11618	1.11024	1.08752
																																								1.73264	1.82708	2.20758	2.20755	2.07812	2.1678	2.5041	2.79332	2.70033	2.61841
																																								0.764179	0.873314	0.858138	0.867914	0.816654	0.783862	0.831417	0.803294	0.866531	0.89001
																																										0.875701	0.81266	0.831996	0.816543	0.881113	0.837922	0.821819	0.815915
																																										1.05545	0.993004	0.911475	0.963266	0.929437		0.92242	0.836757
																																												1.86241	2.00526	1.80475	1.38729	1.77856	1.14852
																																												1.10832	1.01535	1.13624	1.01674	0.864626	0.945536
																																													3.41438	2.53103	3.39632		3.8432
																																														1.11852	1.12413	1.13073	1.19305
																																															1.18619	1.13659	0.939785
																																																1.10296	1.05609
																																																1.31566	1.23303
																																																1.46574	1.31141
																																																	0.599001
1.14494	1.77548	1.75433	1.65716	1.68364	1.60188	1.65454	1.63939	1.6654	1.6305	1.622	1.53741	1.62985	1.58347	1.62608	1.57215	1.57165	1.6157	1.64253	1.52653	1.55453	1.56013	1.61472	1.55143	1.60556	1.58981	1.58458	1.46515	1.43912	1.47613	1.34981	1.30384	1.14132	1.08525	1.1731	1.1586	1.19795	1.27796	1.36027	1.23313	1.3186	1.44985	1.54337	1.56933	1.48945	1.90494	1.68288	1.81668	1.73968	1.58449
0.583442	0.584563	0.579032	0.587311	0.564639	0.565847	0.608098	0.630902	0.642773	0.652102	0.623916	0.63346	0.647947	0.644395	0.6516	0.636092	0.638398	0.658999	0.663223	0.650333	0.629577	0.607722	0.61509	0.635652	0.616816	0.628165	0.631955	0.604825	0.698392	0.750933	0.758163	0.801912	0.801698	0.830789	0.813275	0.837301	0.850411	0.844873	0.887542	0.889628	0.91146	0.920672	0.869279	0.87044	0.852856	0.870928	0.865974	0.911025	0.889976	0.890917
0.614617	0.643161	0.705614	0.727846	0.700001	0.63295	0.665563	0.60697	0.60953	0.619395	0.60621	0.644479	0.663295	0.649211	0.600036	0.656174	0.677521	0.690457	0.708337	0.739723	0.698327	0.723614	0.799464	0.82217	0.829351	0.896869	0.908581	0.878313	0.831157	0.887066	0.924424	1.03239	0.995889	0.932334	0.963334	0.880657	0.838348	0.801077	0.91008	0.854253	0.897316	0.917004	0.946439	0.866712	0.919245	0.988815	0.967035	0.99912	1.00384	0.99356
1.35759	1.40798	1.40642	1.43545	1.4364	1.37637	1.38971	1.32924	1.30188	1.32488	1.31647	1.32709	1.32292	1.30335	1.34341	1.31891	1.33484	1.35616	1.35088	1.25197	1.27822	1.27723	1.28439	1.30282	1.40091	1.40332	1.46993	1.45342	1.43776	1.46288	1.4751	1.50188	1.5069	1.52984	1.55363	1.53246	1.55413	1.56407	1.62676	1.58124	1.57309	1.62504	1.64069	1.5775	1.56389	1.54034	1.53292	1.51843	1.52102	1.53572
1.44148	1.42521	1.33613	0.838713	0.824724	0.787872	0.84537	0.733671	0.62534	0.67287	0.690759	0.640568	0.594224	0.628385	0.581175	0.59805	0.541938	0.539383	0.541132	0.5559	0.55148	0.571731	0.506061	0.515632	0.508401	0.46519	0.560809	0.578437	0.586035	0.589298	0.538247	0.510202	0.508228	0.529208	0.565588	0.557975	0.58227	0.62966	0.63905	0.573449	0.650979	0.639157	0.685374	0.650745	0.635896	0.651142	0.643175	0.646186	0.625547	0.590565
1.02006	1.08869	0.981786	1.05193	0.989686	1.02098	1.18489	0.966092	0.92747	0.943437	0.88059	0.994513	0.87391	0.950386	0.94109	0.947466	1.17996	1.05441	0.909697	0.851523	0.84906	0.936383	1.0204	1.01577	0.957643	0.937915	0.891606	0.911124	0.83148	0.895876	0.891145	0.847823	0.832967	1.01448	0.960128	0.883352	0.882714	0.75906	0.897004	0.868944	0.929794	0.804078	0.745573	0.854815	0.849946	0.897367	0.870203	0.791114	0.932797	0.83194
0.84017	0.849872	0.850895	0.905653	0.915505	0.934784	0.970323	0.981414	1.01289	1.01577	1.01448	0.925775	0.986948	0.95436	0.897653	1.04022	1.03112	1.08343	1.07885	1.07083	1.0933	1.17405	1.15788	1.21927	1.19639	1.26631	1.36001	1.25049	1.16769	1.19142	1.21191	1.23935	1.12637	1.21048	1.17501	1.07975	1.13981	1.10198	1.09345	1.07836	1.06932	0.9845	1.00696	1.03951	1.02897	1.04091	1.05888	1.03781	1.04057	1.01637
0.437626	0.434941	0.442562	0.460447	0.51066	0.531302	0.607804	0.623235	0.642603	0.655619	0.706332	0.709892	0.782363	0.828681	0.84361	0.876881	0.957333	0.942608	0.967754	0.940629	1.00919	0.992569	0.991342	1.04333	1.04721	1.02508	1.05093	1.04467	1.01048	1.01522	1.06228	1.04628	1.09301	1.1547	1.1905	1.27062	1.33869	1.38681	1.40185	1.43907	1.46343	1.45977	1.4691	1.61689	1.59587	1.51366	1.46606	1.42395	1.36612	1.398
1.09182	1.14489	1.09243	1.05384	1.06193	1.02208	1.06473	1.13471	1.19301	1.25229	1.24664	1.23187	1.33807	1.28199	1.33105	1.37229	1.36632	1.32097	1.36211	1.37815	1.30319	1.24226	1.24566	1.28004	1.37609	1.40685	1.36936	1.45216	1.3897	1.3526	1.32747	1.27628	1.35128	1.33548	1.33113	1.349	1.34436	1.39387	1.32567	1.43513	1.41238	1.38159	1.39657	1.41866	1.42721	1.3963	1.40164	1.42263	1.39515	1.43367
0.799054	0.763298	0.742314	0.766634	0.741876	0.706858	0.724231	0.697698	0.769886	0.78025	0.804463	0.81949	0.86713	0.88218	0.937188	0.978318	0.976275	0.998685	1.04009	1.03003	1.00077	0.981858	0.935605	0.936909	0.943162	0.93072	0.913461	0.903134	0.935616	0.975245	1.01804	1.03356	1.05879	1.11292	1.12108	1.10819	1.11642	1.11786	1.1049	1.08071	1.05827	1.03588	1.02303	1.03295	1.01025	1.01992	1.01339	1.03997	1.06198	1.04087
0.679277	0.689904	0.70129	0.651312	0.677109	0.69686	0.697405	0.684445	0.694954	0.700538	0.709629	0.707887	0.665747	0.656809	0.655538	0.633135	0.617523	0.618564	0.614332	0.621887	0.614615	0.656721	0.63519	0.653445	0.671153	0.711186	0.722551	0.750449	0.763172	0.844114	0.92911	0.950792	1.01002	1.01331	1.09425	1.1064	1.11532	1.09808	1.13372	1.20044	1.18634	1.28102	1.31373	1.22151	1.28816	1.11589	1.30115	1.33612	1.37292	1.35101
0.762847	0.717474	0.715894	0.750707	0.78459	0.794206	0.798627	0.765099	0.764109	0.73595	0.761279	0.746064	0.784862	0.775492	0.711954	0.764078	0.743319	0.704997	0.690838	0.691285	0.731684	0.705496	0.641962	0.690177	0.652377	0.660041	0.690423	0.698384	0.670509	0.733122	0.737554	0.748824	0.783393	0.770217	0.811615	0.826891	0.884272	0.836979	0.864577	0.900624	0.863411	0.901003	1.02252	1.03717	1.03464	1.08019	1.08339	1.15349	1.1948	1.29776
0.756036	0.793075	0.795564	0.858953	0.898157	0.905106	0.915085	0.899351	0.819839	0.827003	0.86147	0.833013	0.869568	0.893624	0.939013	0.950003	1.02117	0.986183	0.889766	0.936804	0.897556	0.864499	0.868938	0.90801	0.978795	0.940149	0.923653	0.941575	0.909872	0.935152	1.04871	1.11984	1.10866	1.08633	1.04779	1.04144	1.00472	0.909922	0.93886	1.02735	1.07631	1.09244	1.01595	1.00537	0.959007	0.919579	0.946871	0.935005	0.95047	0.974619
0.483064	0.516431	0.496123	0.522643	0.534438	0.542907	0.53399	0.571291	0.582523	0.629585	0.618927	0.632989	0.638222	0.703574	0.679226	0.668301	0.662325	0.735302	0.73252	0.724749	0.760099	0.756	0.784316	0.791941	0.774644	0.805838	0.851869	0.835754	0.826617	0.791744	0.800413	0.791152	0.768025	0.786645	0.761371	0.759354	0.756645	0.793407	0.756397	0.789453	0.77356	0.794002	0.749542	0.765578	0.754823	0.755946	0.746511	0.736574	0.784038	0.793214
1.18822	1.07895	1.00256	0.897131	0.837377	0.798504	0.736536	0.701715	0.727974	0.65649	0.644254	0.627882	0.615242	0.590986	0.562583	0.54881	0.555785	0.569751	0.558314	0.583334	0.564861	0.567659	0.547276	0.550391	0.551702	0.54892	0.550484	0.535646	0.538784	0.504714	0.536686	0.554398	0.552983	0.554535	0.567162	0.55551	0.589299	0.601026	0.61384	0.647922	0.652037	0.664981	0.665381	0.694393	0.670322	0.673981	0.67664	0.658421	0.70003	0.698072
0.662011	0.652539	0.634775	0.633743	0.625018	0.629947	0.586849	0.592445	0.62932	0.617913	0.605791	0.618203	0.652806	0.658924	0.663073	0.680975	0.665983	0.675644	0.66224	0.637357	0.607323	0.610132	0.593985	0.626868	0.630594	0.63316	0.646512	0.650428	0.643343	0.644235	0.631603	0.62863	0.64657	0.642634	0.63425	0.648912	0.64625	0.649357	0.67546	0.674231	0.700783	0.703995	0.708835	0.694414	0.692212	0.711204	0.694315	0.570927	0.618005	0.81711
1.09502	1.12192	1.08186	1.12679	1.07523	1.08601	0.911013	0.852472	0.8075	0.801848	0.841238	0.823301	0.861218	0.892467	0.924865	0.931509	0.982572	0.990206	1.00263	1.01026	1.03006	0.96195	0.960655	1.00481	1.0034	1.00262	1.00405	1.04172	1.04423	1.05705	1.06632	1.13418	1.15694	1.20781	1.23599	1.36621	1.25907	1.34729	1.00822	1.2941	1.40883	1.4891	1.52096	1.43074	1.41014	1.41868	1.40164	1.33415	1.33773	1.37234
0.698723	0.677079	0.665695	0.678044	0.663464	0.694429	0.746844	0.717672	0.755324	0.793362	0.803326	0.78834	0.779689	0.776088	0.792501	0.769692	0.761733	0.708272	0.788397	0.768826	0.74274	0.65288	0.681064	0.708982	0.743921	0.653998	0.708696	0.784527	0.780365	0.770158	0.74639	0.849431	0.930429	0.935352	0.880255	0.83249	0.782723	0.826438	0.847117	0.888715	0.908489	0.943341	0.951378	0.989984	0.972049	0.969237	0.937449	0.94235	0.908488	0.828798
1.35982	1.28141	1.4913	1.39725	1.43846	1.47171	1.51807	1.44519	1.49914	1.44772	1.43813	1.53339	1.50914	1.56805	1.69049	1.48825	1.53775	1.4885	1.49867	1.52294	1.53927	1.52109	1.41235	1.42369	1.40594	1.44695	1.46684	1.4225	1.38275	1.37973	1.39195	1.41535	1.4546	1.43833	1.51834	1.56771	1.57903	1.64635	1.73994	1.78651	1.68869	1.73245	1.74938	1.68883	1.67245	1.69029	1.69122	1.6451	1.6695	1.58991
0.815296	0.827825	0.855368	0.775489	0.711924	0.605247	0.53732	0.542418	0.497095	0.498913	0.499948	0.509468	0.551655	0.54741	0.554979	0.587294	0.606478	0.677698	0.719994	0.737629	0.747695	0.731229	0.752423	0.786651	0.768511	0.834921	0.830961	0.850361	0.843025	0.784791	0.758523	0.738514	0.741364	0.750868	0.737414	0.755023	0.806088	0.85377	0.901431	0.922324	0.98969	1.03262	1.07124	1.09722	1.12966	1.15604	1.19893	1.1851	1.13313	1.1172
1.18255	1.04916	1.27023	1.26693	1.22383	1.20998	1.21613	1.15856	1.1465	1.19286	1.15272	1.17088	1.21508	1.19828	1.21901	1.23213	1.14973	1.16585	1.23591	1.17802	1.15221	1.16867	1.12886	1.11675	1.09472	1.17241	1.20762	1.15008	1.20732	1.17792	1.21838	1.11871	1.15856	1.13219	1.16145	1.1479	1.09508	1.10829	1.13204	1.19621	1.2171	1.23217	1.28623	1.29991	1.27015	1.27138	1.30294	1.3041	1.32977	1.33379
0.818918	0.921577	0.939747	0.919413	0.942221	0.830601	0.890774	0.916753	0.905267	0.89687	0.924186	0.955379	0.99716	1.04715	1.02239	1.04172	1.06358	1.06164	1.08335	1.0593	1.01184	1.01381	1.00051	0.992883	1.0101	1.05979	1.06637	1.07317	1.07554	1.10475	1.1109	1.11258	1.12438	1.14722	1.14453	1.15122	1.18578	1.2122	1.20487	1.18444	1.14188	1.11861	1.12416	1.09672	1.13242	1.1377	1.15305	1.17047	1.16309	1.1736
0.627359	1.54936	1.41381	1.10216	1.476	1.22848	1.27544	1.05732	1.60002	1.6206	1.44415	1.46268	1.30687	1.51402	0.551347	1.23986	0.614253	1.60644	1.15347	1.61809	1.33455	1.47046	1.32243	1.34063	1.28609	1.27967	1.20266	1.2722	1.23716	1.22191	1.13044	1.18676	1.12867	1.07398	1.08287	1.21087	1.50952	1.82745	1.65792	1.70828	1.82645	0.835998	1.33866	1.34975	1.39435	1.2515	1.16004	1.24877	0.851099	1.04278
0.962023	1.00279	0.992571	1.00979	0.962541	0.90748	0.93008	0.893567	0.883504	0.862084	0.841911	0.889044	0.898742	0.948169	0.932673	0.948599	0.961422	1.0045	1.04697	1.01503	0.979876	0.971777	0.983083	0.962593	1.01989	1.02456	0.984566	0.976685	0.915923	0.905511	0.918471	0.905176	0.874014	0.890213	0.889121	0.915553	0.896017	0.901649	0.862584	0.858097	0.862917	0.863534	0.845353	0.854479	0.851543	0.867806	0.921215	0.946216	0.936656	0.927921
1.48908	1.40446	1.43411	1.37027	1.35723	1.4498	1.47857	1.48784	1.51365	1.55168	1.56094	1.5354	1.46163	1.4775	1.48006	1.56524	1.48008	1.46494	1.46772	1.46333	1.47235	1.46047	1.42701	1.40551	1.41735	1.44384	1.47952	1.46207	1.42203	1.39214	1.43526	1.42793	1.46751	1.45459	1.39503	1.39962	1.4399	1.48776	1.48263	1.46165	1.44542	1.47738	1.46057	1.42672	1.38107	1.39779	1.3972	1.40548	1.36259	1.35763
0.555787	0.57646	0.586484	0.5882	0.556583	0.556781	0.542718	0.480691	0.506125	0.549722	0.577475	0.557539	0.572595	0.589633	0.593112	0.560682	0.610159	0.632495	0.660321	0.677562	0.673441	0.649329	0.616092	0.617982	0.617133	0.624713	0.644181	0.703893	0.70866	0.796594	0.743779	0.781829	0.814923	0.850183	0.903435	0.893492	0.925367	0.954372	1.00008	1.03109	1.09498	1.04314	1.06311	1.08981	1.13197	1.09401	1.03655	1.01885	0.986779	1.06612
0.928202	0.920993	0.897803	0.979506	0.967046	0.950542	0.940341	0.942348	0.880227	0.899116	0.884649	0.870332	0.903395	0.931624	0.9006	0.894236	0.946953	0.933007	0.980049	0.920267	0.895004	0.958265	0.936945	0.931185	0.949158	0.936106	1.00264	1.03046	1.0416	1.07493	1.04601	1.04758	1.06389	1.02853	1.05887	1.06409	1.08221	1.12224	1.13309	1.12681	1.13716	1.10591	1.15915	1.15782	1.19431	1.19515	1.18634	1.2141	1.18977	1.22325
0.70927	0.741624	0.765847	0.762785	0.784202	0.79539	0.807451	0.850261	0.863892	0.878504	0.871107	0.872056	0.888045	0.918496	0.939734	0.931868	0.975139	0.996911	1.00593	0.973279	0.953811	0.912231	0.893759	0.88801	0.867054	0.864394	0.874522	0.864834	0.840653	0.84118	0.857001	0.850617	0.863791	0.876886	0.897964	0.951199	0.996429	0.999042	0.99259	1.01522	1.01757	1.0137	0.95556	0.949978	0.948643	0.967268	0.975091	0.98844	0.998647	1.00077
0.752768	0.789487	0.827412	0.850134	0.862933	0.881309	0.883792	0.882608	0.911751	0.92324	0.919375	0.949302	0.951335	0.965445	0.998103	1.01574	1.01799	1.08266	1.10305	1.11976	1.15239	1.18118	1.19142	1.25572	1.29367	1.35023	1.33236	1.39455	1.39738	1.42092	1.35274	1.35033	1.33002	1.33539	1.33013	1.34774	1.36437	1.39271	1.43983	1.49613	1.5234	1.55179	1.57828	1.60952	1.60226	1.53345	1.548	1.48544	1.51118	1.56248
1.49953	1.58673	1.646	1.60475	1.5984	1.46202	1.63138	1.58262	1.65894	1.48868	1.54423	1.53537	1.48316	1.51865	1.54591	1.41783	1.3983	1.27146	1.30893	1.17467	1.15445	1.13894	1.09044	1.18934	1.16065	1.06304	1.12923	1.16952	1.15758	1.11905	1.14221	1.14637	1.09523	1.07472	1.08594	1.24285	1.17926	1.17567	1.27889	1.25909	1.26438	1.26618	1.19442	1.22682	1.20151	1.23979	1.24142	1.29542	1.29769	1.33079
0.514374	0.553947	0.581515	0.519832	0.517258	0.592412	0.636949	0.515543	0.516168	0.512935	0.559383	0.586551	0.580786	0.619057	0.658301	0.68857	0.688949	0.718599	0.758632	0.734355	0.708234	0.741995	0.764999										0.7624	0.762645	0.782437	0.766045	0.833325	0.881781	0.929371	0.924628	0.950639	0.963423	0.967007	0.972915	1.01116	1.01296	1.02229	1.02235	0.990621	0.970063
1.12218	1.34517	1.51344	1.60962	0.950608	0.966883	1.00518	1.08174	1.17431	1.19712	1.27762	1.50095	1.4611	1.47368	1.28573	1.29316	1.2184	1.13033	1.24385	1.22133	1.22745	1.12622	1.18091	1.26787	1.50154	1.29664	1.2688	1.31401	1.3142	1.23073	1.16823	1.2681	1.29274	1.02049	1.08563	1.09203	1.07053	1.21959	1.2466	1.3417	1.3013	1.29706	1.15548	1.16546	1.46267	1.26755	1.25531	1.40761	1.41169	1.44467
0.48563	0.480295	0.506408	0.55382	0.554872	0.569933	0.619802	0.663443	0.715553	0.754969	0.760067	0.810807	0.836213	0.830049	0.888779	0.942201	0.959708	0.971249	0.966773	0.964029	0.913709	0.971279	1.01153	1.06521	1.05636	1.13434	1.12526	1.15113	1.12126	1.11884	1.09052	1.05582	0.987951	1.04131	1.03165	1.05381	1.03465	1.04552	1.071	1.11025	1.12715	1.1207	1.19689	1.2603	1.33691	1.38555	1.38975	1.40358	1.49854	1.51895
0.48927	0.457458	0.463269	0.460462	0.478585	0.495841	0.488838	0.505175	0.531155	0.467358	0.493477	0.53556	0.579414	0.612721	0.619896	0.642589	0.609693	0.565665	0.58042	0.618799	0.636209	0.608164	0.554125	0.633084	0.618994	0.685477	0.707428	0.728799	0.748115	0.803606	0.742217	0.749876	0.776909	0.778331	0.807939	0.854942	0.910207	0.9206	0.923841	0.950645	1.0151	0.944334	0.939483	0.904605	0.826352	0.839693	0.792467	0.872791	0.781505	0.758007
0.832811	0.737433	0.954811	0.922568		0.856458	0.784198	0.64406	0.861008	0.737876		0.724299		0.79465	0.78676	0.749308	0.866665		0.680402		0.824501	0.77132	0.86828	1.58634	0.677411	0.762242		0.690542	0.952593	0.770783		0.69985	0.779062	0.679524	0.690097	0.644057	0.714216		0.468952	0.608831	0.606144	0.624575	0.519356	0.698075	0.635658	0.678976	0.619111	0.653721	0.545056	0.718342
1.02308	1.0337	1.02982	1.02456	0.993025	0.976808	0.986113	0.997761	1.03869	0.986198	1.03311	0.940209	0.975413	0.950371	0.964767	0.929284	0.952113	0.921723		0.990354			0.941085	0.947522	0.928331	0.987411	0.959877	0.914506	0.953471	0.911652	0.967588	0.918773	0.999443	0.965715	0.986016	0.976629	0.925016	0.894779	0.884877	0.939309	0.964657	0.959849	0.962913	0.921613	0.963667	0.963015	1.02234	0.967562	1.01803	1.03146
1.24778	1.39976	1.38747	1.26125	1.26719	1.22981	1.32987	1.292	1.34656	1.34051	1.06806	1.17793	1.18512	1.18008	1.13079	1.16167	1.0914	0.918908	0.968523	0.974279	0.895387	0.802849	0.873748	0.73963	0.79415	0.844162	0.82772	0.794921	0.722392	0.949414	0.837995	0.799304	0.940594	0.875605	0.874266	0.7698	0.924864	0.853316	0.740451	0.736171	0.823902	0.774502	0.765483	0.676132	0.73848	0.798723	0.805679	0.780829	0.805917	0.750596
1.30532	1.18163	1.16762	1.10605	1.17242	1.44271	1.0584	1.36458	1.47454	1.30357	1.31652	1.29444	1.19061	1.22604	1.229	1.264	1.42723	1.7137	1.23215	1.19072	1.99197	1.2922	1.78477	1.18131	3.13875	1.77031	1.39271	3.95399	3.35819	3.49899	3.82429	2.95391	3.1858	2.78921	2.82237	2.40772	2.14884	1.93099	2.12497	1.99315	1.9215	1.83936	1.79744	1.62887	1.37869	1.37018	1.38482	1.3111	1.20331	1.04844
	0.95915	1.02081	0.998036	1.04665	1.14861	1.31701	1.25516	1.23448	1.21438	1.15388	1.14786	1.17706	1.83535	1.2437	1.20268	1.36338	1.32696	1.4283	1.49548	1.35373	1.41967	1.51153	1.4486	1.55233	1.67927	1.68395	1.85484	2.09217	2.36747	2.45984	2.40062	2.5354	2.56711	2.45735	2.29706	2.44371	2.1637	2.04541	2.0386	2.00149	2.01392	1.85704	1.92658	1.97243	1.81452	1.85324	1.74224	1.77125	1.56491
	0.80736	0.88304	0.893483	0.866344	0.832038	0.81353	0.741192	0.726361	0.756451	0.740869	0.745344	0.756213	0.721516	0.757193	0.772008	0.734807	0.714585	0.713685	0.708644	0.711569	0.694198	0.710805	0.73305	0.769224	0.796232	0.787564	0.771195	0.77173	0.756066	0.760659	0.716097	0.768035	0.777835	0.763574	0.771854	0.735743	0.749807	0.770467	0.776952	0.806565	0.775312	0.747189	0.755021	0.760769	0.750233	0.773357	0.811335	0.715439	0.744777
	0.752253	0.768061	0.801157	0.854576	0.85548	0.89584	0.906827	0.871191	0.897274	0.922022	0.93019	0.981802	1.01631	1.00002	1.03785	1.0174	1.02861	1.01168	0.983987	0.961184	0.964723	0.9125	0.871081	0.857473	0.836632	0.892016	0.875842	0.883211	0.953344	0.994798	0.995933	1.04482	1.01531	1.01771	0.98716	0.99939	0.939813	0.920353	0.934013	0.890618	0.920022	0.930555	0.912607	0.907093	0.863018	0.805839	0.820523	0.838535	0.825882
	0.647542	0.642807	0.652601	0.630141	0.661949	0.673503	0.678388	0.68229	0.666809	0.690248	0.703038	0.731056	0.712182	0.707117	0.704347	0.651483	0.705762	0.662535	0.683434	0.700014	0.68683	0.653577	0.676644	0.692266	0.68934	0.679287	0.685719	0.669927	0.658389	0.631085	0.638813	0.618834	0.639132	0.659904	0.657086	0.723742	0.712501	0.702399	0.707358	0.722178	0.765354	0.74681	0.74216	0.765062	0.779211	0.794171	0.808794	0.834356	0.831241
	0.630666	0.632989	0.628504	0.625063	0.611559	0.630008	0.613436	0.607444	0.636558	0.648299	0.628599	0.63362	0.653147	0.633561	0.638159	0.628903	0.672591	0.673467	0.675941	0.654431	0.660877	0.708838	0.716562	0.751251	0.751332	0.770029	0.792962	0.785405	0.78641	0.798431	0.809807	0.823978	0.839811	0.868912	0.888209	0.886311	0.912699	0.926913	0.925875	0.940236	0.947772	0.927983	0.956811	0.923484	0.951504	0.96577	0.966844	0.976554	0.996631
	1.83801	1.97082	1.81662	1.88222	1.80282	1.71403	1.90857	1.75796	1.64242	1.81702	1.54254	1.49139	1.54509	1.56872	1.63669	1.65983	1.59187	1.43845	1.46523	1.70715	1.79583	1.59006	1.69268	1.54402	1.57173	1.51086	1.60671	1.49693	1.40635	1.52128	1.57635	1.68563	1.76986	1.84417	1.69781	1.71627	1.87341	1.85141	1.85188	1.9283	1.88479	2.01215	1.96463	1.9281	1.89834	1.89723	1.91783	1.8438	1.81418
	0.75117	0.778701	0.742503	0.772101	0.774255	0.803146	0.809128	0.845973	0.896672	0.918076	0.930064	0.961656	0.990182	0.979862	0.993034	0.984225	1.03771	1.04711	1.02481	1.01878	1.01313	0.991045	1.03108	1.03029	1.03157	1.04527	1.02125	1.01326	1.0508	1.02685	1.05952	1.03828	1.0468	1.04516	1.0533	0.977534	1.00811	0.971657	0.971808	0.98963	0.998612	1.04298	1.04133	1.04681	1.15286	1.22717	1.31301	1.36787	1.4315
	0.685051	1.16241	1.14382	1.11939	1.01723	1.04376	0.985163			0.965248		0.89843				0.871558	0.911059	0.901956	0.923588	0.903276	0.881855	0.821077	0.796016	0.753666	0.752334	0.764328	0.762917	0.757316	0.76244	0.780071	0.828576	0.828434	0.842833	0.866293	0.853153	0.804486	0.803427	0.776257	0.742946	0.701691	0.708787	0.692757	0.690471	0.670217	0.671596	0.677578	0.684687	0.681497	0.693731
	1.20016	0.893674	0.996255				0.898758	1.01526	1.03094	1.13202	0.937309	1.05003	1.0905	0.990165	1.00497	0.988772	1.15376	0.950251	0.995469	0.968574	1.00116		0.889458		0.823557	0.618588		0.721208	0.756954	0.692181	0.628425		0.685394	0.678626	0.684437	0.782111	0.779645	0.775196	0.68626	0.71958	0.766282	0.67018	0.717899	0.83256	0.652491	0.731711		0.848466	0.768345
	0.820458	0.878732	0.800488	0.821735	0.804625	0.839324	0.823589	0.819994	0.899795	0.7976	0.823132	0.785235	0.798043	0.709208	0.57783	0.805133	0.828381	0.83093	0.839746	0.844965	0.944615	0.861914	0.879128	0.907541	0.97072	0.892561	0.888152	0.877993	0.84718	0.860477	0.853438	0.830955	0.806032	0.808044	0.792726	0.815704	0.815113	0.802313	0.837634	0.803133	0.899759	0.839762	0.897231	0.901649	0.880325	0.865053	0.894825	0.850125	0.834071
																	0.582024													0.711126	0.67914	0.720005	0.676279	0.608308	0.629319	0.641723	0.718963	0.698666	0.691962	0.701138	0.708026	0.678047	0.661902	0.738927	0.750331	0.77977	0.743375	0.8461	0.921285
		1.13312	1.13438	1.19121	1.16912	1.21322	1.25232	1.34833	1.42115	1.51657	1.58196	1.67369	1.69198	1.70049	1.80918	1.8017	1.70232	1.57539	1.4483	1.34869	1.23082	1.23914	1.26793	1.36168	1.35822	1.41524	1.39777	1.42455	1.39959	1.31924	1.46064	1.33188	1.35178	1.48626	1.37607	1.3625	1.36586	1.34751	1.3571	1.39091	1.35678	1.48743	1.45834	1.45024	1.40679	1.41945	1.3193	1.43373	1.44298
		1.3593	1.38487	1.29563	1.31248	1.28521	1.35899	1.38953	1.37253	1.37609	1.39132	1.31867	1.33435	1.37555	1.35805	1.37121	1.39093	1.46269	1.4562	1.44003	1.40375	1.31535	1.29629	1.31288	1.34621	1.37252	1.36159	1.38321	1.32819	1.35964	1.38396	1.37922	1.3842	1.39841	1.41882	1.37159	1.36799	1.35966	1.31983	1.25905	1.28397	1.31694	1.25104	1.20331	1.23335	1.21379	1.22555	1.24014	1.19347
		0.969786	0.950386	0.912783	0.830868	0.840289	0.844225	0.822958	0.786216	0.816471	0.815805	0.763435	0.760155	0.779948	0.747327	0.7801	0.782883	0.789606	0.736865	0.759523	0.742159	0.730553	0.727507	0.707761	0.712792	0.72175	0.7137	0.743186	0.694617	0.720046	0.71744	0.726534	0.728912	0.697657	0.729644	0.74104	0.749694	0.68657	0.730476	0.68554	0.79592	0.7725	0.763976	0.762165	0.717847	0.728798	0.855469	0.712127	0.776
		0.59768	0.630805	0.642253	0.692299	0.677407	0.687152	0.690595	0.700651	0.665393	0.656198	0.680295	0.680159	0.665792	0.656662	0.663024	0.70018	0.707742	0.699765	0.671223	0.707349	0.713029	0.696066	0.744135	0.77411	0.778254	0.772887	0.801624	0.823839	0.830766	0.854086	0.861114	0.847911	0.840486	0.796293	0.809381	0.825797	0.813104	0.821543	0.819599	0.836026	0.841999	0.870226	0.896319	0.893116	0.881188	0.896351	0.895367	0.917423
		1.24672	1.21081	1.16986	1.13776	1.15884	1.10706	1.12386	1.15808	1.10336	1.18094	1.19299	1.17748	1.15362	1.15216	1.12492	1.10094	1.09246	1.12607	1.07568	1.0888	1.11075	1.11446	1.13487	1.10624	1.11005	1.11564	1.11231	1.19555	1.2241	1.25369	1.21526	1.18607	1.22233	1.23552	1.29215	1.31927	1.36621	1.35087	1.37771	1.43216	1.40937	1.52132	1.55959	1.54282	1.72379	1.60524	1.62884	1.66856
		1.10721	1.23543	1.4527	1.25026	1.63966	1.12944	1.21553	1.20572	1.33659	1.24601	1.22469	1.2574	1.2428	1.18611	1.25868	1.22769	1.27031	1.4157	1.79413	1.83961	1.86198	1.85828	1.7707	1.8264	1.8845	1.92722	1.88693	1.91684	1.92969	1.95902	2.10936	2.15515	2.12545	2.32555	2.37555	2.21012	2.22578	2.18545	2.2753	2.1192	1.86749	1.93475	1.96489	2.01946	1.99449	1.85063	1.88604	1.82621
		0.981966	0.908453	0.855459	0.844738	0.832524	0.849052	0.838057	0.805124	0.824138	0.784917	0.810274	0.840892	0.815769	0.85347	0.88992	0.953604	0.983518	0.997075	1.00133	1.05255	1.11288	1.20304	1.19441	1.19922	1.22247	1.19096	1.12332	1.21203	1.21228	1.21915	1.16084	1.12477	1.10522	1.14019	1.16627	1.18279	1.12935	1.22418	1.32451	1.33891	1.46757	1.47793	1.53954	1.58548	1.51877	1.53437	1.51437	1.60975
		0.769844	0.76096	0.721075	0.712013	0.680857	0.68148	0.699988	0.668018	0.697208	0.709507	0.708132	0.735736	0.728209	0.743825	0.777002	0.826325	0.848955	0.812512	0.791835	0.796078	0.786507	0.798072	0.78786	0.794014	0.791818	0.838453	0.84338	0.891779	0.957246	0.927611	0.976054	0.990431	0.989625	0.99496	0.998194	0.993742	1.05593	1.04639	1.04528	1.05029	1.08041	1.11067	1.11755	1.12756	1.17293	1.16851	1.21167	1.19664
		0.821289	0.794613	0.701322	0.615386	0.658475	0.637161	0.670726	0.67802	0.644805	0.664002	0.647293	0.636482	0.65645	0.666129	0.666928	0.704678	0.709214	0.731886	0.720168	0.728025	0.736538	0.726366	0.737815	0.769935	0.802342	0.853297	0.897159	0.944107	0.974365	0.947734	0.979858	0.941118	0.93417	0.901916	0.863773	0.83102	0.817267	0.776094	0.787061	0.804059	0.794353	0.831793	0.824613	0.880685	0.853033	0.889759	0.880918	0.887123
		1.00772	1.07832	1.06611	1.08477	1.17332	1.10316	1.12562	1.13701	1.065	1.0457	0.900792	0.877102	0.88613	0.876484	0.840335	0.8832	0.873258	0.852834	0.868644	0.837621	0.824062	0.83729	0.814206	0.8327	0.846686	0.878295	0.87532	0.933455	0.98309	1.02442	1.02289	1.0444	1.03666	1.04828	1.04573	1.02966	1.0085	1.03716	1.03596	1.06765	1.09707	1.13251	1.17131	1.26064	1.30326	1.38027	1.46645	1.49365
		0.619442	0.6616	0.648638	0.631128	0.589026	0.624385	0.629759	0.610908	0.5904	0.586602	0.588778	0.606152	0.564809	0.568351	0.576784	0.612818	0.601914	0.609276	0.628273	0.631242	0.66382	0.654763	0.67002	0.641471	0.665804	0.639092	0.609166	0.61914	0.604005	0.58711	0.574174	0.612055	0.596378	0.615925	0.65853	0.665598	0.671468	0.673043	0.673129	0.674932	0.664932	0.68162	0.677413	0.684898	0.704719	0.72025	0.691246	0.656252
		1.307	1.29897	1.24399	1.25709	1.32916	1.40697	1.43953	1.46883	1.50595	1.56586	1.66409	1.6131	1.62628	1.58448	1.54716	1.43266	1.37771	1.32035	1.29116	1.24034	1.24607	1.29515	1.28606	1.29202	1.29661	1.34519	1.32391	1.34018	1.37062	1.42433	1.46522	1.43165	1.45708	1.43898	1.37066	1.34228	1.33461	1.37321	1.37582	1.33119	1.33468	1.32132	1.32628	1.32944	1.27503	1.34287	1.31962	1.34812
		0.717922	0.726326	0.755093	0.774297	0.791223	0.757939	0.718565	0.688337	0.709576	0.843408	0.945615	0.995574	0.958153	1.01184	1.006	1.05369	1.12429	1.11998	1.06276	1.02472	1.07149	1.0974	1.07311	1.20132	1.22953	1.19244	1.18729	1.22963	1.2045	1.17236	1.13262	1.14477	1.16811	1.14104	1.22316	1.23552	1.28047	1.24304	1.30239	1.28977	1.29693	1.30626	1.3103	1.23519	1.1729	1.1819	1.16245	1.21275
		0.844185	0.85176	0.86917	0.857805	0.886332	0.856796	0.914792	0.93634	0.954951	0.910896	0.937657	0.950842	0.925655	0.932385	0.960957	0.962824	0.908865	0.895107	0.941442	0.926767	0.90946	0.961552	0.994252	1.06856	1.10651	1.13526	1.15529	1.12454	1.16627	1.15122	1.18254	1.17752	1.20566	1.2442	1.31802	1.38676	1.46171	1.51113	1.50581	1.48619	1.45983	1.41728	1.38903	1.40402	1.41912	1.44314	1.38112	1.40239
		0.785228	0.763556	0.776043	0.78351	0.777439	0.791157	0.835473	0.846205	0.853849	0.845363	0.853147	0.870755	0.839312	0.880251	0.852723	0.899889	0.871309	0.881554	0.852361	0.850232	0.875534	0.884962	0.905723	0.936295	0.977585	1.00483	1.05011	1.11401	1.09743	1.05614	1.05656	1.06416	1.01618	0.976134	0.97364	1.01362	0.978925	0.995303	0.969522	0.965849	1.08591	1.0572	1.06533	1.1202	1.0797	1.11952	1.07042	1.04492
		0.716642	0.708519	0.713555	0.732101	0.709713	0.700192	0.716039	0.709194	0.719685	0.709785	0.685551	0.709565	0.738324	0.7418	0.728848	0.781186	0.794986	0.790396	0.751012	0.729764	0.733155	0.746612	0.746055	0.80108	0.803439	0.797545	0.777663	0.798271	0.771583	0.755794	0.745866	0.739821	0.760157	0.780263	0.750786	0.831837	0.815556	0.857125	0.860097	0.90373	0.941405	0.986387	0.999898	1.04585	1.02719	1.03216	1.07558	1.03389
		1.02376	1.02961	0.920291	0.996357	0.979186	0.950452	0.975592	1.03191	1.01102	1.0625	1.14505	1.16212	1.19313	1.19797	1.22266	1.2247	1.31498	1.30372	1.26558	1.23985	1.21396	1.18298	1.18473	1.22647	1.23953	1.23893	1.22432	1.26078	1.25452	1.29734	1.30114	1.32654	1.30719	1.28518	1.33177	1.29205	1.30507	1.3178	1.35023	1.38389	1.34399	1.3411	1.44363	1.49529	1.49423	1.49114	1.53943	1.49947
		0.532107	0.578458	0.546354	0.576197	0.567092	0.542819	0.559118	0.5693	0.546789	0.534039	0.560658	0.591772	0.617809	0.638665	0.628461	0.666395	0.653721	0.650896	0.644245	0.618884	0.6305	0.598949	0.67081	0.671258	0.647405	0.653369	0.621401	0.642932	0.584725	0.614378	0.626955	0.611822	0.558142	0.580047	0.605295	0.624883	0.63509	0.631982	0.641794	0.634875	0.641906	0.681369	0.712575	0.713386	0.734192	0.773546	0.761584	0.760989
		0.619389	0.613439	0.643766	0.65016	0.640066	0.713085	0.664346	0.691054	0.695968	0.71713	0.746338	0.727266	0.74779	0.754617	0.760786	0.784017	0.735394	0.761418	0.733801	0.674106	0.770386	0.744417	0.786485	0.757636	0.814279	0.819998	0.831948	0.835459	0.846172	0.859747	0.89915	0.900183	0.843294	0.843884	0.826399	0.770484	0.800827	0.900294	0.922752	0.870125	0.814527	0.851036	0.854362	0.906939	0.894135	0.92079	1.00114	1.01152
		1.03881	0.995999	1.07861	1.10503	1.19	1.20031	1.21324	1.18633	1.25136	1.2531	1.31925	1.31289	1.29649	1.24893	1.20388	1.19218	1.14089	1.08222	1.05599	1.03221	1.06275	1.10347	1.11644	1.09324	1.13184	1.11866	1.11225	1.07002	1.04806	1.06078	1.03554	1.0171	1.00052	1.01422	1.03197	0.979434	0.98524	0.984337	0.974976	0.988052	0.999905	1.0115	1.02877	1.08648	1.1423	1.13409	1.0971	1.06442
		0.588685	0.681586	0.68901	0.67085	0.677053	0.696532	0.751364	0.775787	0.818016	0.770844	0.790443	0.835342	0.842327	0.784754	0.82312	0.825726	0.809189	0.752127	0.784306	0.740871	0.759262	0.76703	0.785294	0.778555	0.771876	0.811246	0.847367	0.837281	0.8837	0.984561	1.14578	1.14271	1.20903	1.09409	1.05508	1.04934	1.12449	1.06713	1.09758	0.995304	1.03571	1.1278	0.98998	1.00117	0.985008	0.995005	1.05723	1.10188
		0.582491	0.626433	0.607979	0.623876	0.690033	0.699299	0.674192	0.699321	0.678368	0.686945	0.678408	0.659587	0.670821	0.701478	0.59938	0.656293	0.662925	0.682068	0.638324	0.699177	0.745907	0.703627	0.723155	0.7598	0.792131	0.752724	0.754404	0.763526	0.723726	0.755044	0.759322	0.768494	0.788783	0.728775	0.810139	0.741714	0.789687	0.805752	0.815558	0.752509	0.786504	0.808511	0.80354	0.896265	0.940815	0.928627	0.870784	0.874553
		1.27818	1.46478	1.28694	1.49581	1.52936	1.47215	1.41942	1.40877	1.37182	1.3564	1.36584	1.33634	1.36472	1.35154	1.39038	1.44489	1.34066	1.27334	1.22679	1.24211	1.21422	1.22614	1.24122	1.23047	1.27488	1.3295	1.37251	1.38492	1.4938	1.53725	1.60308	1.62742	1.6951	1.79814	1.80043	1.89904	2.03322	2.03077	2.02932	1.9967	2.05239	1.96816	1.99672	1.91471	1.90408	1.86197	1.80141	1.68109
		1.07808	1.05048	1.06358	1.11343	1.2017	1.21237	1.25045	1.33166	1.37371	1.39474	1.46421	1.43814	1.52577	1.5124	1.56045	1.58236	1.58335	1.54317	1.54663	1.61713	1.64424	1.70531	1.7012	1.62482	1.68216	1.6878	1.71249	1.74512	1.76852	1.66262	1.56522	1.47399	1.42704	1.38971	1.47202	1.44713	1.43756	1.42583	1.41879	1.382	1.30887	1.28008	1.3398	1.28543	1.30059	1.26053	1.26724	1.61185
			0.823662	0.843892	0.823785	0.855992	0.820381	0.848279	1.01725	0.868307	0.909927	0.937748	0.993331	0.992151	0.961767	0.998511	1.00855	0.998971	1.03651	0.990396	0.987931	0.96478	0.963387	0.978415	1.03807	1.01168	1.05818	1.0905	1.0296	1.04907	1.08905	1.09752	1.14744	1.17181	1.18742	1.25528	1.21641	1.22867	1.1826	1.23269	1.27073	1.22272	1.29102	1.27016	1.24237	1.30046	1.24107	1.24396	1.22454
			1.00043	1.01149	1.00843	1.01667	1.05705	1.07406	1.0452	1.09894	1.13852	1.18526	1.27137	1.28283	1.31943	1.38722	1.4769	1.5359	1.50633	1.55507	1.52662	1.52097	1.60492	1.64537	1.61348	1.64626	1.62047	1.3012	1.71368	1.63509	1.65955	1.67863	1.70254	1.69375	1.64478	1.613	1.63674	1.66989	1.7096	1.69724	1.65433	1.66974	1.68327	1.7058	1.6534	1.65143	1.68148	1.82057	1.81948
			0.810631	0.671094	0.846705	0.89597	0.888124	0.910881	0.904757	0.939868	0.92407	0.894147	0.867373	0.847669	0.856182	0.884791	0.879126	0.895392	0.879425	0.844099	0.827593	0.811395	0.81394	0.816779	0.849508	0.82597	0.819323	0.813819	0.798582	0.807646	0.780413	0.767559	0.768357	0.760963	0.758689	0.753881	0.755411	0.744679	0.762156	0.754581	0.760542	0.7639	0.767252	0.777907	0.756012	0.766675	0.786366	0.798256	0.816628
			0.819342	0.752406	0.746808	0.74869	0.772635	0.709586	0.738728	0.695645	0.664159	0.650127	0.667681	0.664511	0.672263	0.680562	0.724894	0.746643	0.733995	0.72024	0.688932	0.682135	0.650689	0.638713	0.641673	0.641269	0.66038	0.656699	0.651943	0.66771	0.71611	0.699784	0.695037	0.739008	0.734946	0.762883	0.738111	0.750592	0.759199	0.790589	0.832239	0.855351	0.832065	0.853388	0.820576	0.848111	0.868447	0.87882	0.89316
			0.924732	0.940477	0.917559	0.930101	0.915932	0.962408	0.988225	1.03827	1.06175	1.07486	1.07212	1.0623	1.09108	1.08647	1.1176	1.13824	1.07212	1.08128	1.07355	1.07279	1.10032	1.10204	1.14741	1.10789	1.12628	1.08163	1.1124	1.1262	1.12497	1.14088	1.20341	1.18413	1.17232	1.15798	1.15225	1.18217	1.16778	1.16139	1.16582	1.16119	1.12194	1.08659	1.07353	1.08348	1.07683	1.08991	1.1146
			1.88532	1.817	1.99867	1.95011	2.08209	1.99969	2.15081	2.05485	2.05814	2.03772	1.90083	1.7266	1.71966	1.75171	1.70926	1.89159	1.86003	1.77014	1.8939	1.91419	1.92356	1.87446	1.96486	1.97317	1.99713	1.91652	1.91665	1.92698	1.91615	2.11219	2.02048	1.89814	1.94103	1.98564	1.84443	1.86802	2.06393	1.88116	1.84838	1.75499	1.87167	1.82695	1.83927	1.76261	1.92313	1.69459	1.54171
			0.766998	0.714932	0.710774	0.704723	0.736464	0.796526	0.7917	0.818682	0.804384	0.800848	0.753707	0.757386	0.75364	0.772499	0.795526	0.777348	0.716948	0.765043	0.749923	0.754091	0.83732	0.948167	0.994918	1.10019	1.10072	1.13293	1.13585	1.19974	1.28039	1.36386	1.37249	1.46181	1.49459	1.45281	1.3924	1.38974	1.41242	1.42126	1.39257	1.41943	1.41776	1.33849	1.31148	1.33262	1.30486	1.29366	1.25421
			0.919718	0.811696	0.770458	0.796657	0.845043	0.861489	0.839298	0.882097	0.897441	0.869472	0.888639	0.872809	0.871455	0.859885	0.903362	1.01299	0.978044	0.992155	1.07257	1.07267	1.15796	1.16788	1.21621	1.22164	1.25895	1.21741	1.30534	1.34071	1.38067	1.47238	1.50042	1.55012	1.56337	1.59598	1.61797	1.59545	1.61706	1.5713	1.61165	1.53037	1.689	1.62722	1.66704	1.62385	1.58449	1.57823	1.5537
			0.643418	0.614456	0.618243	0.647954	0.635854	0.659374	0.677094	0.687265	0.727893	0.754082	0.781394	0.822589	0.815514	0.837758	0.877111	0.906752	0.87902	0.85698	0.849643	0.846316	0.838548	0.857489	0.877502	0.890829	0.929068	0.95152	0.958096	1.01404	1.03562	1.08697	1.16938	1.2462	1.23056	1.19852	1.24305	1.26037	1.27715	1.3254	1.27118	1.34	1.36909	1.40713	1.41704	1.37933	1.37574	1.47498	1.41147
			0.717621	0.752314	0.770722	0.834965	0.802245	0.794334	0.740461	0.744884	0.768858	0.803813	0.802443	0.817229	0.824583	0.823841	0.836134	0.833725	0.896019	0.835268	0.875045	0.884767	0.893055	0.880077	0.86242	0.884991	0.898943	0.878441	0.867044	0.794844	0.814694	0.820306	0.790433	0.818043	0.817237	0.834739	0.829268	0.824623	0.849058	0.889295	0.905704	0.87075	0.947837	0.953832	0.986408	1.01532	1.02502	1.01825	1.06644
			0.515773	0.555718	0.487019	0.529809	0.528394	0.572414	0.57124	0.581122	0.615724	0.620889	0.612139	0.639356	0.667539	0.679388	0.697336	0.705544	0.715796	0.720203	0.729193	0.722558	0.773222	0.774862	0.744198	0.770647	0.781754	0.805934	0.803772	0.834322	0.844955	0.881271	0.878634	0.882944	0.885281	0.906162	0.921141	0.925222	0.934515	0.919314	0.935084	0.912241	0.893841	0.878375	0.893514	0.911301	0.937754	0.948774	0.978472
			1.27049	1.32116	1.22457	1.22474	1.22188	1.26494	1.38599	1.43208	1.44255	1.48416	1.42308	1.52767	1.4896	1.57758	1.47893	1.46905	1.49964	1.45689	1.38694	1.38854	1.31045	1.31981	1.29503	1.25553	1.20544	1.16079	1.17986	1.24955	1.29107	1.25576	1.25773	1.2478	1.21322	1.20244	1.17195	1.15985	1.14996	1.14063	1.14284	1.14359	1.18853	1.18248	1.25311	1.24331	1.24289	1.27769	1.22827
			0.537215	0.551931	0.572287	0.59851	0.56086	0.587611	0.602661	0.581115	0.581456	0.615185	0.616122	0.607783	0.604331	0.601888	0.650729	0.661851	0.660464	0.649241	0.642706	0.665911	0.690838	0.748456	0.769708	0.774935	0.776562	0.719732	0.726997	0.699691	0.658972	0.661696	0.618947	0.613795	0.615212	0.64415	0.672153	0.673209	0.67204	0.661735	0.650397	0.673385	0.699898	0.700857	0.699446	0.714409	0.719541	0.746163	0.770802
			0.865694	0.902616	0.873953	0.876661	0.900523	0.903857	0.911652	0.898143	0.89587	0.884644	0.838675	0.861262	0.840371	0.850045	0.8653	0.835372	0.830341	0.812522	0.818044	0.809462	0.812357	0.829421	0.811378	0.832023	0.816943	0.858621	0.852015	0.888023	0.889223	0.911056	0.936816	0.957628	0.950875	0.959239	0.976018	0.972083	1.01179	1.03895	1.03283	1.02737	1.0063	1.03069	1.05194	1.06336	1.01797	1.09872	1.11406
			0.561224	0.524611	0.511632	0.528828	0.540685	0.550398	0.568976	0.569172	0.531386	0.516536	0.517389	0.551019	0.553771	0.576091	0.598646	0.602843	0.606331	0.587647	0.565611	0.564337	0.564909	0.5828	0.582531	0.582687	0.619654	0.618485	0.624117	0.626914	0.622557	0.625227	0.638219	0.622631	0.628818	0.617624	0.639969	0.643283	0.657682	0.682707	0.729482	0.770409	0.782265	0.808398	0.817815	0.839458	0.865828	0.86637	0.869269
			0.777456	0.742579	0.72231	0.702017	0.691025	0.704983	0.75579	0.7725	0.73956	0.740704	0.717811	0.697632	0.718831	0.71557	0.72616	0.74366	0.717848	0.717751	0.693733	0.714808	0.735953	0.755953	0.779983	0.778201	0.791302	0.84052	0.815492	0.818025	0.828973	0.796246	0.809531	0.795549	0.788477	0.839404	0.866136	0.85538	0.884387	0.963169	0.987703	1.00183	1.01003	1.07231	1.03093	1.04038	1.04321	1.08389	1.07941
			1.04338	1.04125	1.02484	0.990728	0.961722	0.990402	0.99601	1.00106	0.966026	0.98067	1.0141	1.00962	0.984195	0.987822	0.975896	1.02877	0.944517	0.895135	0.893566	0.901778	0.878531	0.918418	0.963038	0.935052	0.888271	0.999496	0.938175	0.977841	0.96288	1.00466	1.05813	1.04581	1.0864	1.08335	1.14129	1.08463	1.11536	1.12487	1.17646	1.12521	1.11069	1.12688	1.09766	1.05321	1.14305	1.10926	1.15132
			1.06682	1.04122	1.08507	1.10927	1.33402	1.38105	1.29846	1.43403	1.58378	1.60323	1.62711	1.61215	1.82977	1.67737	1.54298	1.61509	1.52721	1.61575	1.64185	1.90345	1.75989	1.90316	1.5594	1.71701	1.85041	2.30563	2.22827	1.95348	2.08564	1.81217	1.96354	1.58016	2.30371	1.62005	1.68549	1.59462	1.76324	1.97381	1.84966	1.92961	1.56312	1.64028	1.57767	1.7601	1.50165	1.69194	1.60425
			0.702794	0.720597	0.581504	0.652775	0.79278	0.64327	0.579143	0.689006	0.680025	0.728187	0.750087	0.58631	0.712757	0.710366	0.719003	0.69538	0.674413	0.621488	0.646465	0.588608	0.596578	0.591602	0.628706	0.575803	0.580953	0.619563	0.632774	0.563502	0.573919	0.638506	0.659757	0.655063	0.661696	0.669937	0.723571	0.742368	0.734848	0.712658	0.7323	0.729693	0.802176	0.721078	0.735434	0.595345	0.625359	0.69679	0.753985
			0.613548	0.661482	0.648975	0.629197	0.624604	0.650504	0.605574	0.622849	0.638194	0.628863	0.626508	0.629548	0.638603	0.6796	0.744867	0.776873	0.802318	0.770265	0.756607	0.799426	0.836006	0.788485	0.774318	0.695396	0.651125	0.611948	0.651819	0.660424	0.716761	0.756107	0.773595	0.824121	0.861291	0.891912	0.88398	0.927595	0.966803	1.00164	1.02734	1.07204	1.07043	1.03145	1.01294	0.988518	0.973458	0.93223	0.925231
			1.37171	1.39113	1.44254					1.80948	1.86496	1.73957	1.74567	1.71543	1.66066	1.62378	1.63541	1.68546	1.59355	1.51821	1.47775	1.46373	1.47943	1.50728	1.53717	1.5131	1.57643	1.54366	1.59176	1.62612	1.55482	1.62139	1.59423	1.63518	1.5477	1.5225	1.46131	1.52688	1.51279	1.55483	1.58224	1.58269	1.51335	1.58317	1.52172	1.4443	1.41827	1.26242	1.2555
			1.24552	1.20899	1.25284	1.33418	1.41229	1.50527	1.42463	1.48747	1.48187	1.50824	1.51071	1.46064	1.38003	1.27108	1.30523	1.19574	1.11468	1.09442	1.13636	1.09402	1.08826	1.10687	1.12981	1.08341	1.05411	1.07858	1.08052	1.08258	1.13248	1.06921	1.13548	1.15818	1.15444	1.10147	1.10484	1.12659	1.13335	1.11714	1.08727	1.05466	1.07505	1.11179	1.14294	1.12449	1.16975	1.11575	1.09896
			0.700146	0.691214	0.71514	0.732712	0.751966	0.749698	0.730873	0.738793	0.71251	0.673947	0.655012	0.64906	0.655637	0.631994	0.637562	0.671282	0.65688	0.645957	0.640815	0.658661	0.634944	0.654081	0.615496	0.632177	0.648701	0.647325	0.659612	0.681874	0.681912	0.71853	0.722078	0.740341	0.761956	0.766605	0.762283	0.774027	0.781045	0.763836	0.786281	0.76125	0.752825	0.744625	0.733909	0.735163	0.723438	0.736998	0.736512
				1.02068	1.06725	1.18195	1.15913	1.22987	1.23981	1.23813	1.26337	1.25394	1.28175	1.289	1.32812	1.36053	1.35318	1.35224	1.32792	1.3281	1.30898	1.35088	1.35983	1.31881	1.37262	1.39982	1.42933	1.43238	1.46252	1.50236	1.54967	1.5403	1.55863	1.58264	1.63223	1.57987	1.51645	1.50013	1.58247	1.50984	1.54217	1.61199	1.53902	1.69052	1.74	1.7602	1.68684	1.82556	1.83406
			1.66885	2.10149	1.45175	2.02963	1.19277	1.21963	1.25866	1.18429	1.09287	1.04972	1.00536	1.00304	1.04743	1.13921	1.16272	1.25848	1.19184	1.18644	1.19507	1.16142	1.11657	1.11998	1.12715	1.13876	1.12335	1.14666	1.15501	1.15086	1.17416	1.28844	1.14793	1.34176	1.20841	1.24027	1.20684	1.29017	1.37445	1.54934	1.50498	1.54496	1.54986	1.75252	1.7209	1.78128	1.75212	1.77561	1.87067
			1.07437	0.942809	0.940935	1.08159	1.2944	1.21768	1.30072	1.1897	1.27348	1.04859	1.0728	1.13147	1.22951	1.19889	1.07211	1.20068	1.06603	1.29389	1.09616	1.11986	1.08142	1.45562	1.14335	1.82975	1.19003	1.19552	1.36811	1.26335	1.31641	1.3023	1.12637	1.16826	1.12852	1.18463	1.17626	1.16653	1.26176	1.4309	1.59033	1.88262	1.63251	1.71141	2.17833	1.99969	1.86369	1.97118	2.38324
			0.83175	0.754449	0.730667	0.798136	0.825401	0.842978	0.828845	0.893437	0.946939	0.929086	0.979875	1.00814	1.01825	1.05593	0.970473	1.01197	0.925047	0.923706	1.04551	1.06892	1.07283	1.08411	1.13374	1.18224	1.24351	1.33337	1.49517	1.50847	1.50816	1.6217	1.57376	1.51731	1.06961		1.22025	1.31764				1.46236	1.45424	1.29123	1.44222	1.6811	1.64551	1.587	1.69793
			1.00556	0.997956	1.08023	1.04325	1.14867	1.22203	1.22225	1.25509	1.27195	1.3057	1.31217	1.28626	1.38148	1.39573	1.42009	1.50796	1.53589	1.79554	2.26543		0.789864	0.700238	0.706829	0.576732	0.806566	1.01096	1.35086	1.42458	1.46522	1.48402	1.47489	1.42874	1.36759	1.24957	1.15243	1.18052	1.16973	1.16387	1.16504	1.14476	1.20432	1.18359	1.10677	1.10502	1.14982	1.10533	1.11018
			0.510503	0.55013	0.504358	0.499737	0.48194	0.493973	0.541773	0.555827		0.596521	0.598203	0.590955	0.622731	0.670168	0.672904	0.714164	0.694024	0.661565	0.662579	0.683783	0.667101	0.660298	0.697109	0.693062	0.68501	0.678321	0.688948	0.668611	0.67129	0.672543	0.684396	0.684257	0.699954	0.691879	0.713268	0.713484	0.71617	0.716247	0.746783	0.749403	0.740791	0.732883	0.752034	0.779769	0.795466	0.811812	0.814415
			1.23922	1.40634	1.2461		1.28444	1.29956	1.2931	1.35012	2.35249	0.62564	0.635716	0.667198	0.723644	0.73429	0.796702	0.865972	0.811655	0.818458	0.81488	0.815537	0.813128	0.763418	0.706383	0.703897	0.732713	0.724191	0.750837	0.745775	0.777744	0.769619	0.777104	0.823876	0.818004	0.87194	0.952961	1.00835	1.13092	1.21369	1.25882	1.37504	1.40557	1.51283	1.53844	1.52076	1.55813	1.53793	1.51408
			0.683991	0.711218	0.676508	0.705795	0.664993	0.687091	0.717497	0.735302	0.728557	0.712386	0.705136	0.717255	0.706241	0.706957	0.696743	0.689995	0.693158	0.645231	0.674373	0.645714	0.645006	0.631048	0.652595	0.663315	0.632965	0.655399	0.638999	0.604639	0.656932	0.717723	0.737112	0.757511	0.718589	0.731176	0.731789	0.752439	0.751769	0.752388	0.770923	0.725545	0.712141	0.716232	0.716621	0.730044	0.78354	0.783346	0.765091
			0.758156	0.727547	0.702686	0.775545	0.784969	0.694357	0.620548	0.721238	0.755595	0.757187	0.639858	0.572346		0.754497	0.840022	0.719891	0.729453	0.656867	0.654098	0.757906	0.716842	0.644765	0.637554	0.713766	0.660106	0.726475	0.722875	0.679606	0.677615	0.769042	0.715234	0.712444	0.725373	0.632491	0.824549	0.683565	0.669696	0.665866	0.697549	0.658423	0.730307	0.605933	0.766192	0.605135	0.695681	0.697451	0.794435
			1.23426	1.12028	1.1162	1.11841	1.13495	1.11811	1.08936	1.03486	1.04864	0.983053	0.966782	0.953288	0.930792	0.918929	0.933906	0.941429	0.936602	0.925819	0.94546	0.939562	0.94202	0.93354	0.929446	0.965469	1.00324	1.03546	1.03402	1.0379	1.02057	0.990389	0.964642	0.964184	0.964761	0.984791	0.987212	1.00734	1.0297	1.04985	1.07543	1.08287	1.07172	1.1336	1.13237	1.17932	1.17495	1.1888	1.17038
			0.822912	0.60475	0.693032	0.860722			0.853333	0.946966	0.952084	0.976414	1.00095	0.994142	0.989569	0.861971	1.05435	0.996852	0.986719	1.04043	1.00371	1.02958	0.968936	0.98173	1.02997	1.15964	1.2139	1.08308	1.05611	1.08835	1.17326	1.17781	1.30024	1.38361	1.4246	1.3451	1.3581	1.53072	1.63856	1.61603	1.62414	1.63756	1.68703	1.58056	1.58453	1.60456	1.62154	1.43154	1.42376
				1.75821	1.73214	1.75614	1.05922	1.49047	1.5659	0.648768	1.50894	0.71868	0.785124	0.69718	0.688306	0.878376	0.81829	1.00209	1.8287	1.9307	2.25908	2.33608	2.5943	2.21235	2.16532	2.18185	2.16377	2.36821	2.58248	2.67728	2.76796	2.95802	2.45065	1.6999	1.88425	1.77261	2.40407	1.69259	1.7042	2.05988	2.12195	2.49206	1.71367	2.33649	2.15596	2.39584	2.11914	2.01007	2.09854
				1.12714	1.08853	1.0473	0.994721	1.05977	1.06546	1.10984	1.12142	1.08391	1.08116	1.08552	1.1113	1.06721	1.14015	1.11175	1.10402	1.09256	1.11194	1.1689	1.15823	1.11334	1.16495	1.18862	1.19802	1.12467	1.10162	1.11361	1.12047	1.10723	1.13819	1.1626	1.22913	1.16923	1.21507	1.16474	1.23864	1.24779	1.16899	1.17711	1.25445	1.20812	1.17711	1.15518	1.1643	1.12803	1.19215
				1.70928	1.71029	1.82982	1.55162	1.88963	1.93807	2.01262	1.99365	1.89594	1.80817	1.8608	1.79431	1.77678	1.82879	1.87154	1.9195	1.67651	1.63205	1.74823	1.71462	1.6265	1.65598	1.67678	1.69842	1.68328	1.57504	1.63391	1.54935	1.60336	1.55563	1.49624	1.44896	1.41051	1.51293	1.43434	1.41593	1.38809	1.28051	1.32482	1.37125	1.29375	1.33181	1.36837	1.28106	1.07118	1.26991
				0.836812	0.867445	0.947125	0.815898	0.830804	0.857031	0.917249	0.975504	0.945607	0.903265	0.975904	0.974863	1.02351	1.01783	1.03828	1.02816	1.03292	1.06474	1.02796	1.0622	1.04351	1.10177	1.12869	1.13778	1.19161	1.20543	1.27822	1.29961	1.31291	1.26256	1.27973	1.27778	1.21111	1.21726	1.17763	1.17015	1.19328	1.23749	1.2441	1.25884	1.34608	1.31653	1.28851	1.24653	1.26859	1.24619
				2.10549	1.72834	1.79488	1.85179	1.78574	1.78133	1.70233	1.67438	1.59694	1.55434	1.54303	1.43901	1.39816	1.38448	1.42605	1.34976	1.30834	1.32499	1.34693	1.39465	1.40047	1.49035	1.50376	1.52808	1.49511	1.50761	1.4628	1.52296	1.49675	1.50204	1.36069	1.47303	1.41597	1.45132	1.48595	1.55326	1.49557	1.40941	1.4924	1.50559	1.47917	1.53175	1.58297	1.64754	1.66657	1.77587
				1.34417	1.31269	1.30112	1.22039	1.24686	1.32446	1.60757	1.2575	1.3178	1.38046	1.43848	1.58735	1.67674	1.62235	1.71746	1.925	1.95749	1.96441	1.98856	1.91357	1.89539	1.93624	2.04049	2.09964	1.9319	1.88713	1.95505	1.97227	2.02851	2.0269	2.05309	2.09794	2.12098	2.20135	2.15267	2.12392	2.05059	1.9815	2.08682	1.95973	1.98885	1.90741	1.92808	1.90169	2.03714	1.88559
				0.727486	0.643443	0.701974	0.779094	0.759988	0.713715	0.798702	0.763398	0.776099	0.790074	0.801344	0.77453	0.799492	0.786287	0.806459	0.831643	0.838043	0.842319	0.873568	0.873242	0.89865	0.958254	1.04804	1.06331	0.986407	1.05167	1.17049	1.24097	1.29667	1.24827	1.26448	1.19986	1.17018	1.12715	1.04892	1.04829	1.05665	1.03635	1.03355	1.05256	1.04117	1.03421	1.04268	0.977758	0.958932	0.936274
				1.0285	0.962411	1.00093	0.995038	1.01936	1.00346	1.01624	0.9637	0.958891	0.953992	0.912364	0.972013	0.979514	1.01489	1.04511	1.0381	1.00629	0.986842	0.932191	0.952209	0.958494	0.972308	0.977569	0.968237	0.996877	0.994926	0.955785	0.978724	0.950213	0.976433	0.954505	0.941339	0.917656	0.885237	0.912017	0.898655	0.933826	0.964586	0.986692	1.03657	1.04565	1.00225	1.00537	1.04756	1.02788	1.0342
				1.01874	1.0474	1.04535	1.07193	1.0196	1.06035	1.09784	1.01284	1.03746	1.01413	1.03603	1.04654	1.0522	1.05364	1.0824	1.11924	1.07163	1.02995	1.0416	1.03767	1.03917	1.03534	1.05881	1.05735	1.13369	1.10835	1.12184	1.18002	1.12093	1.25258	1.25068	1.27214	1.26121	1.24808	1.25799	1.26476	1.30754	1.29577	1.27664	1.27576	1.26661	1.23371	1.20516	1.22118	1.23012	1.194
				0.510096	0.515668	0.557265	0.554586	0.554458	0.545528	0.531343	0.536953	0.524551	0.514813	0.513853	0.534511	0.526119	0.54102	0.537791	0.570659	0.511951	0.574906	0.570192	0.575638	0.531859	0.559252	0.574822	0.601272	0.632474	0.593098	0.544399	0.508225	0.491413	0.495359	0.502043	0.501489	0.528602	0.564484	0.552287	0.560453	0.561911	0.592411	0.56491	0.578468	0.577568	0.573556	0.586569	0.593969	0.631935	0.682137
				1.47709	1.38658	1.54655	1.5598	1.56799	1.55047	1.6071	1.56656	1.53481	1.52969	1.47971	1.52416	1.53394	1.45449	1.44409	1.38371	1.28085	1.26204	1.23904	1.20233	1.32234	1.29257	1.36411	1.41762	1.45374	1.48347	1.5449	1.60699	1.61713	1.66101	1.72041	1.76279	1.82363	1.86232	1.88139	1.86811	1.91336	1.94305	1.97971	2.00824	2.03155	1.93695	2.01833	1.98712	2.08843	2.18306
				1.08658	0.779727	0.671335	0.838558	0.712268	0.855228	0.91183	0.898491	0.958352	0.97695	1.08569	1.12548	1.20225	1.18741	1.29585	1.17542	1.0569	1.12351	1.07527	1.07627	1.0867	1.11955	1.13129	1.05322	1.03431	1.12234	1.0632	1.0327	1.04742	1.09069	1.20537	1.29674	1.45259	1.34779	1.3561	1.37726	1.33385	1.29216	1.29962	1.33453	1.36872	1.32347	1.39046	1.37089	1.35668	1.36763
				0.810671	0.915449	0.989252	0.848573	0.752686	0.73576	0.696203	0.715191	0.785843	0.852242	0.914946	0.966853	0.927148	0.949847	1.04204	1.03858	0.952453	0.943415	0.965082		0.780228	0.79777	0.825398	0.767305	0.846191	0.858101	0.899994	0.871367	0.881046	0.868904	0.905453	0.898095	0.87165	0.861836	0.874022	0.883972	0.90019	0.956682	0.988766	1.01733	1.10986	1.14851	1.14848	1.1676	1.24351	1.26118
				0.529422	0.533316	0.568664	0.57028	0.5612	0.585329	0.563641	0.590957	0.605125	0.617864	0.634922	0.633188	0.657804	0.653966	0.673925	0.672304	0.665129	0.680203	0.663135	0.683342	0.722214	0.708938	0.700737	0.703713	0.69524	0.673503	0.691114	0.711534	0.754868	0.749717	0.759944	0.724507	0.725146	0.720004	0.731895	0.717814	0.722907	0.703311	0.706033	0.726939	0.723647	0.69738	0.679671	0.66658	0.66498	0.661409
				0.646482	0.632675	0.674807	0.691684	0.679042	0.768919	0.813726	0.82792	0.871047	0.926639	0.944481	1.03153	1.03397	1.05271	1.07893	1.07804	1.04805	1.01681	0.977047	0.896306	0.862539	0.812113	0.824943	0.84357	0.869177	0.874815	0.906372	0.932218	0.984318	0.977321	1.04612	1.08055	1.09608	1.08677	1.07045	1.01943	0.962597	0.965585	0.924369	0.915175	0.918391	0.933604	0.952009	0.959661	0.930937	0.961471
				1.33219	1.15913	1.28704	1.25066	1.40867	1.21077	1.18077	1.09945	1.32082	1.15697	1.20819	1.25544	1.56022	1.36617	1.25355	1.50816	1.41434	1.55904	1.79385	1.68666	1.94856	1.82942	1.73639	1.59434	2.00832	1.91403	1.95576	1.61541	1.66101	1.60591	1.55956	1.33295	1.37704	1.37533	1.26875	1.21426	1.31196	1.18981	1.27119	1.09025	1.05347	1.15436	1.1619	1.15441	1.19569	1.16128
				0.634707	0.608425	0.697886	0.621368	0.647564	0.650222	0.651346	0.675716	0.706644	0.676395	0.671391	0.68093	0.735222	0.733303	0.722233	0.693066	0.620694	0.644773	0.669541	0.687424	0.727477	0.721132	0.725428	0.743175	0.728894	0.742307	0.762288	0.771788	0.787629	0.772113	0.802217	0.81538	0.829049	0.839448	0.832912	0.818893	0.799327	0.778049	0.765291	0.783494	0.789622	0.801391	0.865447	0.841821	0.894198	0.905138
				1.83027	1.76815	1.84308	1.73888	1.87723	1.86133	1.82601	1.73105	1.72367	1.67698	1.71612	1.69753	1.67514	1.54312	1.4827	1.44378	1.41828	1.39751	1.3836	1.37492	1.34282	1.36555	1.27866	1.25439	1.24385	1.26635	1.30881	1.36527	1.42915	1.46884	1.4775	1.51537	1.56924	1.53905	1.53185	1.55931	1.45711	1.51065	1.44671	1.4197	1.36074	1.31177	1.29685	1.21174	1.24334	1.31508
				1.56037	1.54978	1.45916	1.42743	1.44405	1.39321	1.32192	1.29077	1.25174	1.22418	1.16558	1.12733	1.12373	1.05039	1.02445	1.03079	0.988167	0.906683	0.891552	0.910695	0.914253	0.927078	0.923804	0.94696	0.976054	0.976621	0.999163	0.991594	1.01032	0.996586	0.999309	0.994068	0.977141	0.968881	0.978001	0.977848	1.00469	0.980341	0.981311	0.963566	0.956556	0.94963	0.949264	0.901501	0.931207	0.913941
				0.907916	0.986147	1.00107	1.08344	1.0822	1.09718	1.22587	1.31721	1.28429	1.2905	1.59331	1.56939	1.67831	1.7461	1.71165	1.75141	1.74687	1.80658	1.77921	1.91368	1.94239	1.80688	1.85408	1.83718	1.90749	1.95312	1.93623	1.88832	1.88179	1.76363	1.71028	1.77488	1.81095	1.81885	1.90008	1.93672	1.98954	1.97995	1.9963	1.971	1.90824	2.03374	1.94848	2.01428	2.10239	2.0633
				0.977197	0.944375	1.07043	1.06985	1.06897	1.04308	1.10043	1.1626	1.18063	1.31932	1.33457	1.36087	1.35899	1.51199	1.58352	1.56029	1.50008	1.48628	1.49185	1.47254	1.48784	1.60002	1.61399	1.63027	1.64212	1.69702	1.66078	1.63603	1.58433	1.57567	1.51576	1.57228	1.48602	1.56295	1.5427	1.61505	1.60519	1.60445	1.55508	1.58006	1.52167	1.54309	1.56975	1.62881	1.57501	1.59511
				1.21025	1.17543	1.69707	1.81093	1.57449	1.37287	1.42165	1.46522	1.38281	1.45975	1.47674	1.39983	1.38134	1.28366	1.16992	1.11194	1.1573	1.22462	1.2496	1.28044	1.31299	1.38651	1.42514	1.32655	1.39477	1.29202	1.23278	1.19263	1.31824	1.39166	1.45586	1.46406	1.53292	1.71032	1.69649	1.85935	1.72263	1.68262	1.88448	1.82874	1.91145	2.05088	1.85033	1.95013	1.94079	1.83132
				0.741699	0.682619	0.754268	0.751938	0.877064	0.774757	0.810096	0.808151	0.736783	0.721108	0.746381	0.764795	0.790002	0.790943	0.795124	0.796105	0.780478	0.806396	0.775139	0.822301	0.803512	0.830199	0.894716	0.912025	0.917897	0.919706	0.955731	0.989927	0.962128	0.989036	1.0139	1.02945	1.04149	1.05541	1.07762	1.06606	1.1291	1.15712	1.18596	1.24842	1.25945	1.29903	1.31913	1.32244	1.25918	1.2408
				1.74022	1.17897	1.08005	1.13747	1.1132	1.30633	1.13161	1.09346	1.0079	1.02828	1.05453	1.0818	1.12009	1.15318	1.15324	1.01045	1.02469	0.980222	0.929912	0.894814	0.872507	0.876032	0.863557	0.862913	0.870085	0.85974	0.852258	0.880505	0.856922	0.897148	0.926518	0.938794	0.931769	0.975506	1.02981	1.05757	1.06536	1.07418	1.07152	1.04153	1.05644	1.08548	1.08803	1.10721	1.08948	1.09855
				0.784415	0.779968	0.801232	0.851182	0.826365	0.744916	0.796971	0.776372	0.768333	0.747466	0.74204	0.69746	0.703773	0.668795	0.652817	0.662894	0.63939	0.664098	0.691584	0.716952	0.765579	0.751179	0.774126	0.773783	0.738882	0.730259	0.734462	0.694114	0.697362	0.697692	0.680054	0.709122	0.717672	0.723017	0.747535	0.753961	0.770301	0.741196	0.758862	0.774125	0.802041	0.816951	0.798869	0.809141	0.847474	0.872383
				1.20455	1.13363	1.20362	1.37814	1.34732	1.36916	1.35991	1.3115	1.42548	1.5328	1.90931	1.63387	1.34847	2.20482	1.40262	1.26545	1.56214	1.29644	1.18621	1.43756	1.1581	1.33642	1.25595	1.30859	1.65407	1.57457	1.30189	2.04219	2.29689	2.37294	1.94655	2.23192	1.85986	2.12538	1.99556	2.2328	2.00091	2.00289	1.98905	1.88829	1.7475	1.77007	1.59606	1.38086	1.94854	1.41421
				0.989175	0.942162	1.06718	1.03618	1.08646	1.03598	1.08901	1.03357	1.13837	1.1706	1.17478	1.29064	1.32796	1.24407	1.28347	1.31021	1.33155	1.35112	1.36659	1.48156	1.44374	1.47436	1.44529	1.5012	1.53302	1.5231	1.53216	1.5303	1.46098	1.56149	1.44501	1.46275	1.4975	1.45424	1.38597	1.41909	1.4291	1.41255	1.43947	1.49151	1.50453	1.48564	1.46571	1.47919	1.50799	1.44099
				0.900466	0.950162	0.939806	0.900329	0.891115	0.890172	0.900796	0.900735	0.91055	0.993722	1.07694	1.05663	1.05776	1.18572	1.21476	1.15786	1.06247	1.03563	1.10963	1.12063	1.17954	1.22076	1.22272	1.30482	1.40686	1.44226	1.4095	1.49321	1.5731	1.55818	1.63265	1.71428	1.71248	1.75282	1.80456	1.85229	1.82494	1.76342	1.79517	1.79997	1.77322	1.74038	1.8071	1.76748	1.76717	1.84664
				1.19989	1.25336	1.26136	1.2861	1.3313	1.35891	1.34649	1.46201	1.64172	1.52299	1.66012	1.773	1.75382	1.63172	1.62354	1.49186	1.39718	1.28888	1.27188	1.24389	1.28279	1.34349	1.27859	1.38302	1.37268	1.3697	1.44232	1.46023	1.50915	1.48139	1.43179	1.52345	1.5935	1.53467	1.47996	1.58927	1.49318	1.52433	1.49519	1.48164	1.39102	1.32864	1.37738	1.40654	1.3766	1.49512
				0.93716	0.944147	0.911781	0.987933	0.937119	0.984052	1.01858	1.00964	1.0052	1.01033	1.01094	1.04952	0.991742	0.96479	1.02155	0.938027	0.919973	0.869843	0.896682	0.870868	0.815043	0.860478	0.91095	0.927659	1.00311	1.03727	1.04324	1.04438	1.06908	1.0986	1.08511	1.10198	1.16281	1.1649	1.22401	1.18969	1.14862	1.12737	1.11554	1.103	1.1022	1.06577	1.13581	1.14479	1.15739	1.17824
				0.594816	0.579359	0.578901	0.56715	0.557904	0.584862	0.55823	0.571374	0.590968	0.579335	0.605287	0.618955	0.633262	0.652037	0.664439	0.662685	0.667362	0.689706	0.692827	0.750614	0.796363	0.835681	0.857729	0.880348	0.885626	0.950568	0.983748	0.981243	1.02071	0.996219	1.05042	1.03316	1.04834	1.0664	1.02238	1.08252	1.06134	1.05993	1.0526	1.05964	1.06607	1.06781	1.05237	1.03823	1.03854	0.989541
				0.634295	0.679689	0.621611	0.691619	0.701622	0.687348	0.692425	0.720207	0.722965	0.736175	0.751339	0.759649	0.766794	0.795545	0.821963	0.793054	0.76197	0.762385	0.746894	0.738809	0.768485	0.778416	0.772925	0.785325	0.785145	0.774884	0.79809	0.797504	0.814197	0.842039	0.865437	0.932175	0.966661	1.01322	0.989566	0.983285	1.00618	1.01379	1.02171	1.02161	1.04827	1.10147	1.1284	1.17229	1.14053	1.13273
				0.992369	1.35621	1.58408	1.41826	1.43259	1.50518	1.37394	1.62843	1.48997	1.69789	1.78501	1.74277	2.07734	1.50999	1.6527	1.73148	1.55171	1.61099	1.554	1.35948	1.49998	1.58678	1.49746	1.46439	1.39547	1.41068	1.38915	1.3804	1.47092	1.40402	1.32507	1.41549	1.37069	1.276	1.38662	1.37745	1.41218	1.32997	1.42188	1.29387	1.30688	1.43844	1.28046	1.33414	1.43186	1.4754
				1.17258	1.03842	1.19387	1.0975	1.05607			1.22047		1.28786	1.27278	1.33585	1.33793	1.27152	1.35522	1.28005	1.27526	1.24812	1.20997	1.21415	1.23973	1.17684	1.23388	1.21618	1.1962	1.28843	1.30488	1.38602	1.35183	1.45237	1.43553	1.48448	1.56858	1.54067	1.55597	1.65301	1.59736	1.60922	1.54475	1.63374	1.65136	1.65318	1.73605	1.71961	1.6865	1.66529
					1.17358	2.05671	1.67994	1.73569	1.9753	1.72952	1.74971	1.62105	1.53897	1.49615	1.56642	1.18	1.69885	1.66701	1.29304	1.1874	1.19548	1.15571	1.10576	1.19003	1.19518	1.22691	1.30439	1.27794	1.33595	1.37646	1.3423	1.35702	1.4072	1.42744	1.28498	1.30806	1.35551	1.34334	1.41489	1.4801	1.53468	1.5156	1.57604	1.57308	1.60864	1.56978	1.604	1.61259	1.61013
				0.727923	0.761057	0.711963	0.883072	0.948498	0.974092	0.951872	0.938516	0.934775	0.866831	0.881537	0.873334	0.885582	0.832914	0.895297	0.842653	0.879747	0.842844	0.833414	0.87872	0.924616	0.889783	0.958419	0.974093	1.04098	1.06996	1.09088	1.11969	1.12455	1.05591	1.05859	1.00368	1.01065	0.996628	0.998259	1.06349	1.02902	0.958137	1.0733	1.08031	1.05582	1.07855	1.11654	1.09377	1.1281	1.11821
				0.668163	0.587831	0.595862	0.54612	0.539732	0.519917	0.519912	0.546162	0.547977	0.552875	0.568162	0.594874	0.583876	0.620005	0.604926	0.592342	0.573522	0.5513	0.572984	0.569877	0.590229	0.589253	0.610092	0.595033	0.603134	0.576059	0.602627	0.593978	0.596926	0.61876	0.628747	0.624335	0.667518	0.652465	0.673585	0.686925	0.706541	0.723336	0.71602	0.714713	0.716884	0.718638	0.717646	0.731967	0.721064	0.715914
				1.79413		0.627671						0.709028	0.973141	0.958814	1.0947	1.01382	0.984409	0.921247	0.893627	0.893665	0.96851	0.854624	0.93685	0.969626	1.02498	0.987753	1.04793	1.13242	1.04283	0.923643	0.962216	0.973989	1.02503	1.06579	1.08031	1.10006	1.08064	1.11458	1.13582	1.10388	1.1317	1.13659	1.1187	1.08732	1.14536	1.23133	1.3125	1.3397	1.22777
				1.17233	1.12349	1.2902	1.43781	1.41173	1.40998	1.38338	1.54498	1.3883	1.42943	1.39113	1.40546	1.40921	1.36325	1.39616	1.32202	1.27128	1.23828	1.21843	1.18049	1.20693	1.20931	1.24208	1.29193	1.24915	1.24171	1.28407	1.23228	1.16106	1.19485	1.08285	1.10832	1.13641	1.14741	1.13967	1.13802	1.17663	1.2184	1.23294	1.29772	1.28258	1.36859	1.36213	1.39427	1.3659	1.36839
				0.710159	0.67283	0.694923	0.702256	0.698162	0.70107	0.677786	0.707702	0.69303	0.704685	0.723232	0.736492	0.776586	0.778698	0.797243	0.756621	0.753731	0.671375	0.685971	0.705593	0.695968	0.680576	0.682153	0.728409	0.730434	0.733768	0.751117	0.750003	0.761964	0.751966	0.757866	0.797853	0.780957	0.847138	0.833463	0.855757	0.820284	0.829482	0.85828	0.852118	0.913988	0.914552	0.92221	0.914275	0.83585	0.867746
				0.895742	0.903393	0.900638	0.894043	0.884931	0.899322	0.936485	0.942743	0.938904	0.949605	1.01601	1.00492	1.01744	1.0423	1.027	1.0085	0.9892	0.994241	0.973443	0.967176	0.97963	1.03394	1.07817	1.0856	1.13722	1.1949	1.24409	1.26412	1.31038	1.26184	1.2559	1.2225	1.17929	1.19494	1.25359	1.28372	1.33511	1.40068	1.39695	1.43553	1.40063	1.462	1.46079	1.4239	1.44401	1.3921
				0.770045	0.723731	0.726484	0.716491	0.742462	0.753129	0.758695	0.775946	0.80085						0.783202	0.760744	0.710223	0.717463	0.798106	0.785412	0.868793	0.883552	0.897068	0.883864	0.885898	0.815311	0.8717	0.891473	0.893245	0.880379	0.855495	0.738652	0.728156	0.762677	0.755666	0.738855	0.745449	0.734193	0.708405	0.719378	0.713891	0.688802	0.654095	0.687784	0.678759	0.655686
				1.69608	1.61498	1.48277	1.34358	1.4888		1.37666	1.39459	1.13963							1.0349						1.48699	1.52163	1.50502	1.59919	1.61536	1.64378	1.59916	1.53388	1.54003	1.53761	1.56277	1.48411	1.54505	1.52488	1.58208	1.60661	1.61112	1.64865	1.71521	1.89173	1.93393	2.08037	2.1298	2.2364	2.24908
				1.03685	1.0448	1.04805	1.04156	1.07218	1.06301	1.0806	1.11066	1.05391		1.01398	1.02014	1.00071	0.948661	0.97769		0.963679	0.871609	0.880693	0.894218	0.964337	0.97691	0.947987	0.985389	1.04049	0.99403	0.975703	0.957802	0.964971	0.917171	0.934505	0.930333	0.925083	0.918727	0.857759	0.831948	0.772667	0.819293	0.803102	0.831671	0.842209	0.80348	0.832442	0.889793	0.900466	0.901328
				0.972406	0.884839	1.00101	0.884235	0.878523	0.885864	0.786263	0.782326	0.786617	0.806534	0.754641	0.784601	0.72814	0.786994	0.86315	0.825345	0.797639	0.935874	0.884011	0.765336	0.856304	0.803105	0.905311	0.824689		0.702795	0.819869	0.87956	0.781029	1.24199	0.942158		1.19965		0.92173		0.776352	1.08956	1.03616	0.86799			0.867628	1.00557	0.770871	0.849131
				1.15333	1.14792	1.26523	1.27124	1.16237	1.25607	1.44393			1.30018	1.34902	1.53299	1.38386	1.40211	1.40211	1.51105	1.65626	2.02392	1.96054	1.8258	1.32183	1.37906	1.66366	1.29894	1.47694	1.41154	1.32688	1.29356	1.37915	1.32591	1.32655	1.38289	1.41127	1.29996	1.42801	1.40584	1.34911	1.37185	1.2983	1.31602	1.34542	1.28421	1.36638	1.38483	1.3912	1.33849
					1.23293	1.10979	1.10268	1.02379	0.988308	1.01031	1.01786	1.02872	1.13454	1.17376	1.12459	1.08885	1.1325	1.16482	1.09849	1.1254	1.10536	1.12998	1.07441	1.09437	1.04227	1.04895	1.06153	1.03649	1.00888	1.00043	0.985876	1.0443	1.02241	0.974782	0.942908	0.935629	0.955786	0.958128	0.950464	0.936624	0.932308	0.96652	0.937622	0.93642	0.916668	0.958201	0.949547	0.920875	0.888481
					1.25395	1.18119	1.11142	1.07977	1.06617	1.07759	1.06435	1.03392	1.05228	1.01148	1.02862	1.03064	1.01933	1.03359	1.01251	0.983908	0.966504	0.967365	0.951812	0.912909	0.879686	0.881216	0.84714	0.849185	0.85329	0.835578	0.849413	0.853724	0.900747	0.895439	0.891894	0.914304	0.880011	0.921561	0.875077	0.911679	0.909552	0.946444	0.958188	0.980851	0.959155	0.962234	0.971121	0.944793	0.935856
					1.17783	0.983897	1.11286	1.19284	1.20116	1.20966	1.27825	1.36665	1.30917	1.35733	1.41312	1.47316	1.46137	1.47532	1.43204	1.43182	1.38128	1.41586	1.45117	1.50926	1.5674	1.60505	1.52275	1.50193	1.4898	1.45369	1.4372	1.53803	1.4872	1.47164	1.55507	1.53687	1.5148	1.38739	1.40871	1.40894	1.39011	1.34884	1.2703	1.22488	1.31325	1.36163	1.37211	1.44988	1.4723
					0.980113	1.06005	1.03396	1.0473	1.18769	1.11221	1.38327	1.29718	1.25026	1.39708	1.40212	1.3733	1.25634	1.19311	1.11721	1.03539	1.01058	1.00193	0.996985	1.02749	1.04316	1.02997	1.00845	0.983407	0.964547	0.989147	1.00791	1.01381	1.02095	1.05135	0.995531	1.00406	1.04349	1.05791	1.03846	1.0478	1.03306	1.00648	0.969833	1.02744	0.966068	0.903058	0.943882	0.92392	0.901373
					0.947772	0.977666	1.01607	1.03151	1.05542	1.07286	1.13733	1.12424	1.18013	1.19053	1.20072	1.20998	1.21678	1.2005	1.15475	1.09607	1.09989	1.09523	1.08591	1.08033	1.06138	1.06542	1.09183	1.10549	1.11048	1.11466	1.1229	1.11877	1.12144	1.13638	1.14785	1.16241	1.20675	1.20676	1.22044	1.21959	1.22342	1.2349	1.21762	1.18077	1.18243	1.18481	1.17991	1.12996	1.11514
					0.805147	0.802491	0.788149	0.818088	0.816257	0.837363	0.829617	0.828763	0.822964	0.810181	0.783695	0.798934	0.813921	0.817747	0.781003	0.800725	0.80057	0.789418	0.801972	0.801031	0.828714	0.863039	0.897099	0.92223	0.932017	0.949013	0.965803	0.960996	0.969725	0.975512	0.950385	0.966655	0.956629	0.975153	0.977526	0.968039	0.950399	0.965967	0.944894	0.961958	0.946066	0.964566	0.987278	0.9911	0.992979
					0.702181	0.613708	0.619589	0.662582	0.723202	0.720843	0.738782	0.732557	0.72053	0.761366	0.72806	0.741529	0.707174	0.674421	0.682225	0.671497	0.700071	0.701443	0.707868	0.707686	0.705241	0.696091	0.702573	0.723527	0.726645	0.752696	0.75992	0.761014	0.785989	0.740291	0.741602	0.734096	0.745458	0.773465	0.81454	0.854682	0.881804	0.912022	0.930689	0.859695	0.873589	0.852943	0.875371	0.872231	0.870031
					0.889461	0.844804	0.941437	0.953941	0.980488	0.989765	0.996239	1.02834	1.00492	0.99032	1.04261	1.09938	1.29264	1.35565	1.4642	1.36124	1.30888	1.37943	1.3838	1.36253	1.31374	1.31027	1.30936	1.20955	1.15997	1.15462	1.1777	1.18926	1.18667	1.22554	1.23469	1.24408	1.20888	1.22286	1.22072	1.14031	1.12619	1.03107	0.969156	0.974625	0.954484	0.965345	0.958498	0.974596	1.03846
					0.712563	0.69135	0.68982	0.671261	0.645732	0.697894	0.611845	0.697874	0.713373	0.726584	0.742816	0.781518	0.802938	0.830322	0.815497	0.817194	0.838636	0.813431	0.860259	0.896706	0.938979	0.934789	0.95384	0.947051	0.97994	0.98513	1.0028	1.01207	0.984074	1.01526	1.0492	1.07684	1.06235	1.08952	1.1025	1.11606	1.13475	1.11968	1.108	1.07913	1.05475	1.03782	1.0359	1.02971	1.00961
					1.08729	1.08645	1.10725	1.11399	1.09946	1.15696	1.16939	1.19247	1.25921	1.23323	1.1851	1.31325	1.27807	1.2501	1.33657	1.17297	1.20072	1.14993	1.15893	1.20243	1.2174	1.23404	1.13728	1.08386	1.11786	1.0847	1.02341	0.974086	1.00096	1.04096	1.0784	1.03007	0.981474	1.16708	1.13246	1.28334	1.33147	1.4416	1.47842	1.44374	1.46584	1.58677	1.65561	1.72237	1.66511
					0.684341	0.725389	0.707619	0.717091	0.69426	0.624542	0.687491	0.678127	0.645016	0.701768	0.709154	0.666927	0.665568	0.668321	0.690961	0.726853	0.758333	0.773574	0.808267	0.830606	0.87766	0.898103	0.908589	0.919765	0.916831	0.901907	0.865064	0.817118	0.797148	0.812182	0.820891	0.803895	0.82283	0.82334	0.816414	0.803917	0.824839	0.841099	0.886932	0.884813	0.778432	0.957872	0.79986	0.885884	0.959707
					0.933778	0.892008	0.895358	0.874485	0.96603	0.991466	1.01199	0.966425	0.971504	0.948274	0.980901	0.990596	0.994081	1.0443	1.0594	1.06881	1.03833	1.02871	1.0152	0.993393	1.00753	1.02392	1.0883	1.09279	1.08821	1.09544	1.1189	1.16061	1.20935	1.17784	1.19222	1.16912	1.11338	1.12839	1.11229	1.0892	1.09363	1.07694	1.15268	1.14502	1.13761	1.15886	1.13568	1.10751	1.11666
					1.01238	1.07746	1.08511	1.07475	1.15926	1.1956	1.21336	1.21641	1.20406	1.20416	1.2008	1.0826	1.03321	0.978969	0.947684	0.935079	0.910177	0.887334	0.906944	0.890225	0.949961	0.937067	1.00519	1.00951	1.04632	1.08627	1.12813	1.20135	1.27483	1.28785	1.37644	1.42138	1.44399	1.45485	1.45658	1.46361	1.37051	1.24021	1.23061	1.24511	1.23152	1.32065	1.47008	1.38019	1.41216
					0.91642	0.875672	0.88463	0.908952	0.947398	0.965573	0.956286	0.96141	0.961982	1.00014	0.995079	0.987639	1.05826	1.07555	1.06393	1.03579	1.00663	1.02111	1.00648	1.02007	1.00238	1.06219	0.981519	1.02146	1.01378	0.996989	1.00477	0.996407	1.00706	0.992848	0.968975	0.971901	0.996021	1.03782	1.05745	1.05143	1.04318	1.02397	1.0388	1.0377	1.01946	1.01075	1.01815	1.02458	0.992778
					0.954209	1.084	0.99317	0.939684	0.978379	1.27904	2.03784	1.16908	1.21665	1.08181	1.05393	1.06259	1.0515	1.02725	0.994999	0.915966	0.920774	0.885432	0.914831	0.926289	0.99445	1.02712	1.08013	1.19738	1.20313	1.26384	1.30289	1.30273	1.25626	1.27	1.30726	1.32437	1.27215	1.2309	1.18317	1.16547	1.18119	1.17957	1.20437	1.18615	1.21359	1.1962	1.17478	1.24462	1.21251
					0.833528	0.844007	0.885254	0.91266	0.911892	0.885874	0.856822	0.869256	0.868312	0.849088	0.846736	0.818377	0.838241	0.882713	0.882611	0.857052	0.79574	0.802132	0.814565	0.759568	0.767545	0.761666	0.779286	0.781992	0.750462	0.752483	0.741589	0.726164	0.759487	0.754922	0.773062	0.768759	0.814713	0.836262	0.844596	0.898805	0.95716	0.960364	1.02757	0.991154	1.02147	1.07913	1.04478	1.03885	1.07742
					0.96149	0.912945	1.06737	1.10289	1.12577	1.1248	1.07128	1.07106	1.01801	1.00058	0.972055	0.971488	0.961153	1.02128	1.03573	1.06243	1.06904	1.08209	1.06415	1.0784	1.09395	1.112	1.22162	1.21808	1.35026	1.36871	1.40536	1.41169	1.38577	1.35434	1.35816	1.39951	1.3862	1.33815	1.33485	1.38374	1.41333	1.48174	1.5635	1.56862	1.63286	1.64685	1.65984	1.60689	1.61082
					1.01961	1.08313	1.05993	0.985398	0.998745	1.02217	1.00168	1.02599	1.00295	1.04118	0.991723	0.993355	1.01538	1.01869	1.01574	0.963418	0.975337	0.945084	0.920703	0.891198	0.895198	0.949366	0.904406	0.898781	0.879822	0.829964	0.805734	0.807715	0.802971	0.7526	0.756142	0.746138	0.759305	0.747521	0.771846	0.818531	0.792456	0.809082	0.808871	0.804424	0.814276	0.799295	0.851269	0.854454	0.884118
					0.52545	0.512911	0.531406	0.512209	0.551564	0.546096	0.56671	0.532264	0.550032	0.574612	0.557178	0.56639	0.583181	0.578361	0.571369	0.591088	0.572464	0.575112	0.560154	0.582829	0.591932	0.566972	0.600931	0.596161	0.593386	0.605732	0.612992	0.617503	0.616605	0.617303	0.626062	0.618826	0.617444	0.629713	0.638933	0.674048	0.696506	0.712936	0.745347	0.774602	0.781831	0.77541	0.782798	0.754619	0.739577
					0.831922	0.883417	0.884722	0.880617	0.825855	0.881456	0.922476	0.905096	0.966643	0.94987	0.985872	0.940909	1.02341	0.925086	0.954312	0.908503	0.866785	0.871243	0.895287	0.887786	0.923059	0.931153	0.926823	0.961167	0.936539	0.950569	1.07827	1.03282	1.09963	1.05318	1.102	1.06549	1.06482	1.08854	1.09208	1.082	1.11399	1.12961	1.12023	1.15509	1.11712	1.09851	1.05403	1.07447	1.17936
					0.5912	0.567939	0.666545	0.6009	0.62836	0.700176	0.620314	0.638657	0.672851	0.697398	0.694504	0.708718	0.706073	0.688792	0.723612	0.693279	0.684837	0.765632	0.81744	0.739658	0.739816	0.894881	0.866301	0.80178	0.828281	0.824698	0.750354	0.805694	0.831409	0.793185	0.803079	0.829875	0.798332	0.780329	0.884139	0.801301	0.881113	0.833896	0.826711	0.786275	0.879632	0.843133	0.888417	0.992285	0.948664
					0.602897	0.621048	0.633069	0.628387	0.624106	0.638381	0.632081	0.653642	0.689838	0.658734	0.665317	0.677062	0.690608	0.734731	0.769867	0.769796	0.735848	0.732363	0.74126	0.731657	0.755079	0.744305	0.753156	0.698122	0.734069	0.751602	0.723044	0.751416	0.755596	0.754232	0.784933	0.735227	0.720952	0.762873	0.758694	0.766212	0.737274	0.801824	0.830901	0.788493	0.793069	0.815026	0.82161	0.864101	0.809708
					0.877538	0.854522	0.832214	0.840054	0.871814	0.926265	0.893493	0.838371	0.810441	0.779146	0.763113	0.7488	0.762496	0.749321	0.703659	0.681014	0.665059	0.684777	0.710008	0.74572	0.746016	0.770772	0.794551	0.744474	0.764524	0.761177	0.787985	0.762943	0.766645	0.796537	0.813261	0.84058	0.817144	0.819554	0.786772	0.787508	0.832604	0.867075	0.884564	0.920667	0.894337	0.903561	0.869428	0.845736	0.842067
					0.693849	0.732934	0.735769	0.748113	0.746468	0.784746	0.795164	0.827466	0.809967	0.86	0.874081	0.926574	0.954517	0.964972	0.960593	0.966228	0.954576	0.939616	0.904739	0.923591	0.930904	0.948269	0.939037	0.952478	0.938559	0.985375	0.96344	0.964869	0.962418	0.983981	1.01337	1.03223	1.0695	1.03524	1.0651	1.12291	1.12599	1.13546	1.16324	1.169	1.17779	1.17398	1.19374	1.1769	1.20243
					1.55857	1.57098	1.7102	1.58179	1.55743	1.5545	1.68623	1.67499	1.61017	1.71051	1.83942	1.79016	1.69909	1.77285	1.79998	1.85408	1.81509	1.84316	1.85734	1.82547	1.87715	1.94122	1.83177	1.87399	1.84807	1.90695	1.86821	1.83368	1.82256	1.93787	1.77802	1.81554	1.76029	1.80319	1.81202	1.85709	1.87226	1.81551	1.87971	1.85352	1.93885	1.92379	1.90675	1.88891	1.89489
					0.835342	0.853145	0.98953	1.00533	1.11281	1.11209	1.1623	1.20366	1.20865	1.2092	1.12883	1.0739	1.07667	1.09513	1.03248	1.00798	1.04951	1.0639	1.10478	1.10766	1.13116	1.17021	1.2166	1.25681	1.29483	1.28509	1.30087	1.30341	1.31956	1.31494	1.30005	1.26953	1.26489	1.28151	1.22709	1.24782	1.25891	1.2363	1.29212	1.27397	1.25346	1.33508	1.26284	1.2558	1.2773
					1.00047	1.02558	1.05101	0.986374	0.974538	0.889134	0.903797	0.813513	0.861393	0.859378	0.820913	0.834489	0.80942	0.866789	0.872193	0.831328	0.807023	0.859172	0.825419	0.866538	0.856606	0.909889	0.852777	0.907148	0.983668	0.991356	0.992467	1.00751	1.0408	1.07933	1.0563	1.02815	0.916076	0.886062	0.929841	0.935055	0.971908	1.00219	1.03372	1.07589	1.0149	1.0919	1.04845	0.975113	0.957379
					0.814571	0.805168						0.883871	0.840053	0.852911	0.849418	0.846115	0.891165	0.907064	0.9215	0.846544	0.828237	0.816951	0.859194	0.880937	0.923216	0.963212	0.994435	1.03377	1.05838	1.09875	1.10345	1.15403	1.09463	1.09767	1.13569	1.11421	1.1317	1.15375	1.16719	1.16708	1.12669	1.06809	1.0621	1.06054	1.06418	1.0445	1.05343	1.05949	1.08631
					0.699054	0.757158	0.770696	0.748192	0.771958	0.859595	0.802987	0.788705	0.836523	0.754287	0.745661	0.718017	0.767693	0.816123	0.818178	0.785548	0.777031	0.743923	0.712578	0.799465	0.79611	0.794866	0.787814	0.812042	0.804535	0.885145	0.811848	0.818392	0.832189	0.80883	0.825385	0.81394	0.807646	0.815444	0.83956	0.869588	0.839379	0.828879	0.864814	0.810694	0.855767	0.839413	0.793807	0.831234	0.72291
					0.527269	0.55742	0.552523	0.572706	0.565287	0.604288	0.616901	0.650049	0.648746	0.662339	0.716061	0.726831	0.765391	0.751391	0.710899	0.699221	0.711622	0.713967	0.70171	0.736846	0.73793	0.732506	0.768346	0.759949	0.789249	0.774628	0.770503	0.7462	0.734315	0.75985	0.781747	0.803515	0.81004	0.862573	0.884538	0.873836	0.87347	0.875402	0.870286	0.897382	0.885666	0.849278	0.876997	0.906903	0.944642
					0.847169	0.80457	0.820792	0.813682	0.803648	0.812525	0.817525	0.768887	0.75413	0.719154	0.666239	0.671514	0.673869	0.65205	0.65719	0.634843	0.637867	0.690736	0.701589	0.704143	0.744466	0.733461	0.732267	0.749216	0.760648	0.807368	0.804928	0.814857	0.824314	0.820305	0.84323	0.847089	0.887614	0.85065	0.838007	0.836941	0.813098	0.801552	0.809896	0.806968	0.880378	0.855029	0.96113	1.02028	1.05091
					0.942256	0.977868	0.942241	0.931269	0.970421	1.04922	0.988354	0.971446	1.0173	0.970803	0.939077	1.03777	1.06859	1.03257	1.00746	1.03802	1.04127	1.08071	1.1218	1.06845	1.04775	1.11069	1.04154	1.08754	1.09799	1.12994	1.16309	1.19103	1.19595	1.26643	1.17702	1.14866	1.07693	1.09645	1.05248	1.09451	1.17646	1.10221	1.09899	1.11219	1.06374	1.15612	1.21798	1.18828	1.18132
					0.912115	0.874121	0.94883	0.861462	0.881038	0.964659	0.958201	0.973569	0.975208	1.02417	0.961461	0.956759	0.910542	0.913341	0.911684	0.917603	0.928635	0.903041	0.921729	0.936172	0.935494	0.945253	0.925724	0.931705	0.892437	0.904877	0.912195	0.887825	0.877106	0.898977	0.92725	0.932117	0.921424	0.929836	0.94713	0.970232	0.96364	1.00336	0.95336	0.956886	0.981699	0.957871	0.967403	0.967823	0.981776
						0.974304	0.981048	1.09604		1.09867	1.1584	1.14717	1.1412	1.18869	1.22407	1.19373	1.21261	1.23059	1.19334	1.16055	1.11529	1.12575	1.12359	1.12766	1.16256	1.20637	1.22593	1.26611	1.32568	1.35766	1.40735	1.42684	1.47053	1.5111	1.50963	1.63706	1.59662	1.57854	1.65427	1.62319	1.60723	1.53439	1.47345	1.51453	1.50494	1.50292	1.52256	1.54771	1.56946
					0.925413	0.93234	0.957108	0.88326	0.949694	1.03602	0.978923	0.970691	0.956294	1.00729	0.793431	0.773766	0.763202	0.753457	0.825583	0.840902	0.894396	0.945013	0.916814	0.986945	0.903609	0.936464	0.878676	0.873051	0.894928	0.8746	0.775569	0.773479	0.896121	1.21048	0.916778	1.1621	1.04644	1.04628	0.968734	1.10144	0.981303	0.852542	0.920527	1.05524	1.15322	1.06819	1.1773	1.08	1.18035
					1.47003	1.4893	1.58494	1.51413	1.62276	1.70398	1.69846	1.74449	1.67551	1.73301	1.70589	1.71791	1.54596	1.53186	1.55083	1.49422	1.40512	1.429	1.50516	1.52063	1.52866	1.56546	1.34961	1.34189	1.28217	1.2278	1.41451	1.35466	1.50242	1.4381	1.33635	1.52403	1.41458	1.42978	1.49273	1.58566	1.46985	1.43725	1.48318	1.39483	1.47039	1.43454	1.40885	1.35912	1.35175
					0.554239	0.585442	0.653263	0.663062	0.662164	0.6726	0.665168	0.66436	0.691316	0.705635	0.729275	0.770878	0.798632	0.82074	0.784051	0.767992	0.769827	0.734374	0.75262	0.744549	0.749891	0.738753	0.742605	0.726812	0.725187	0.735521	0.754048	0.751964	0.799314	0.801838	0.792014	0.832447	0.814084	0.823746	0.787454	0.792918	0.783514	0.799152	0.765005	0.760281	0.732986	0.745942	0.728302	0.738785	0.750158
						1.3696	1.38024	1.33812	1.3614	1.33548	1.44396	1.28964	1.24813	1.26889	1.36019	1.40031	1.45561	1.42245	1.37123	1.34484	1.3729	1.41532	1.39133	1.41795	1.48648	1.48152	1.47126	1.40988	1.41404	1.37695	1.36203	1.40219	1.46403	1.49736	1.50781	1.51966	1.57032	1.54212	1.60285	1.66638	1.71408	1.7125	1.83375	1.85716	1.86741	1.98846	1.94687	1.95475	2.02145
						1.92587	1.90573	1.8735	1.75039	1.64955	1.61844	1.54722	1.55273	1.52477	1.4268	1.42447	1.39635	1.36937	1.41026	1.34351	1.32036	1.22517	1.30978	1.35064	1.3233	1.37757	1.4146	1.35651	1.34927	1.36977	1.28591	1.4241	1.4033	1.40678	1.43124	1.39921	1.45382	1.47904	1.43867	1.42301	1.41744	1.50195	1.40858	1.49404	1.39542	1.28591	1.34449	1.27681	1.28041
						0.869916	0.84899	0.832514	0.951848	0.962365	0.907882	0.975979	0.932207	0.855904	0.882265	0.869817	0.909606	0.811095	0.853999	0.823992	0.905872	0.887873	0.888057	0.90139	0.855675	0.873412	0.801393	0.842332	0.834737	0.850967	0.806024	0.858737	0.833919	0.847738	0.90105	0.897414	0.921107	0.958275	0.944179	0.941999	0.964685	0.964377	0.966408	0.960842	0.86434	1.03315	1.03658	1.112	1.08968
						0.851198	0.845305	0.899652	0.87403	0.881224	0.910709	0.907555	0.915384	0.920897	0.906686	0.921348	0.951776	0.976663	0.946648	0.90807	0.905584	0.86859	0.896773	0.878424	0.844764	0.858542	0.853033	0.896038	0.914273	0.971348	1.00082	1.02523	1.02398	1.01498	1.01506	1.00742	1.02733	0.992622	1.02594	0.989483	1.01869	0.993842	0.983776	0.986989	0.98179	0.945522	0.967979	0.990412	0.942259
						0.664801	0.708821	0.744245	0.755491	0.740366	0.717017	0.707431	0.665448	0.631585	0.636613	0.66428	0.633868	0.615161	0.596291	0.583705	0.590846	0.583739	0.608238	0.604125	0.61878	0.650885	0.671	0.686429	0.713846	0.721874	0.742749	0.737438	0.724365	0.73819	0.72065	0.727757	0.759092	0.732893	0.738528	0.759	0.761542	0.772495	0.795896	0.825332	0.838237	0.845613	0.819212	0.832178	0.849963
						1.42572	1.40814	1.36573	1.40407	1.33236	1.31119	1.31912	1.2961	1.34072	1.28016	1.28125	1.27281	1.26695	1.15968	1.13929	1.1384	1.10665	1.18697	1.20381	1.23145	1.27732	1.231	1.24285	1.25937	1.26093	1.31917	1.36418	1.39636	1.40578	1.38293	1.38032	1.33741	1.34901	1.36494	1.38102	1.38659	1.43962	1.39358	1.49217	1.49456	1.5148	1.48367	1.52132	1.53041
						0.865249	0.949507	0.949898	1.02377	0.925371	1.01108	1.0123	0.9933	0.999556	1.02379	1.03532	1.0542	1.03259	1.0229	0.976174	0.963168	0.948915	0.940987	0.979009	0.996784	1.04005	1.09025	1.15593	1.19356	1.24578	1.24918	1.27153	1.30836	1.35274	1.45212	1.48701	1.56059	1.57683	1.51094	1.65368	1.67008	1.76579	1.80672	1.9272	1.95102	2.09655	1.944	1.94409	1.98684
						0.747948	0.765773	0.789512	0.780997	0.73906	0.813073	0.824856	0.797631	0.770599	0.806861	0.810082	0.877614	0.949326	0.943839	0.884138	0.892012	0.869291	0.896259	0.873866	0.897437	0.928588	0.932873	0.903084	0.92146	0.887287	0.915863	0.894353	0.88545	0.867983	0.894917	0.895411	0.875633	0.890686	0.866656	0.850423	0.836794	0.822184	0.854402	0.832763	0.861025	0.839447	0.88386	0.877373	0.908255
						0.769188	0.832269	0.88881	0.89108	0.984409	0.967619	0.93688	1.00342	0.98802	1.00442	1.08036	1.07381	1.07315	1.09986	1.05202	1.07626	1.06249	1.12673	1.14902	1.10654	1.16237	1.17297	1.09079	1.17692	1.20131	1.23441	1.27857	1.28521	1.28239	1.28552	1.27737	1.3303	1.40375	1.34185	1.40452	1.40413	1.4204	1.49009	1.57969	1.46251	1.46659	1.51729	1.57386	1.47852
						0.923317	1.03357	0.998144	0.993794	0.957651	0.996543	1.04936	1.08539	1.10536	1.13693	1.17969	1.20245	1.20051	1.18916	1.19307	1.18434	1.19804	1.19305	1.21	1.20737	1.23649	1.23483	1.28928	1.27539	1.26912	1.3361	1.30764	1.39665	1.36565	1.36298	1.36451	1.38593	1.35402	1.31894	1.29451	1.3001	1.38264	1.37074	1.37618	1.43092	1.40794	1.40756	1.32769	1.33942
						1.05895	1.04083	1.0526	1.12288	1.05811	1.05174	1.09981	1.13023	1.09155	1.18471	1.24684	1.28402	1.30262	1.23921	1.2071	1.1313	1.0871	1.07629	1.09855	1.11888	1.15204	1.19252	1.26313	1.28702	1.28889	1.27569	1.26966	1.3043	1.26222	1.23662	1.2517	1.2734	1.26682	1.26053	1.23595	1.23786	1.2149	1.22002	1.20548	1.20845	1.22339	1.18136	1.17979	1.15202
						1.42261	1.27067	1.31571	1.46501	1.45562	1.39939	1.53238	1.57491	1.52083	1.61952	1.55771	1.67277	1.50192	1.51855	1.47324	1.42679	1.44596	1.40262	1.4905	1.46332	1.54592	1.48431	1.56328	1.62581	1.68274	1.73405	1.713	1.69314	1.77321	1.7865	1.77223	1.73822	1.8518	1.66152	1.59844	1.67854	1.54653	1.47785	1.69072	1.58847	1.92352	1.89845	2.02323	2.17679
						0.797928	0.811621	0.79331	0.746901	0.888726	0.877118	0.908586	0.90237	0.932952	0.926913	0.928765	0.978714	0.954869	0.948761	0.905861	0.917078	0.8896	0.894188	0.954276	0.963079	0.948685	1.00125	0.995052	0.96869	0.967031	0.926078	0.971879	0.961589	0.969705	0.954339	0.911805	0.9576	0.93743	0.900327	0.869015	0.867144	0.836933	0.827712	0.81121	0.790639	0.739199	0.778001	0.810495	0.738283
						1.15394	1.17025	1.30774	1.23181	1.20137	1.28947	1.2593	1.21916	1.16048	1.18289	1.28842	1.22859	1.25468	1.1728	1.19558	1.2682	1.26366	1.27029	1.28577	1.23574	1.27341	1.29376	1.29228	1.30712	1.23388	1.34009	1.28963	1.38544	1.38575	1.42754	1.45841	1.42929	1.50703	1.40158	1.48534	1.47136	1.45961	1.45074	1.43442	1.44921	1.47292	1.48101	1.40121	1.42301
						1.04474	1.03327	0.981488	0.958769	0.966237	0.84584	0.943264	0.925511	0.90888	0.892433	0.878241	0.961939	1.06985	0.985375	0.956668	1.00296	1.01535	1.0014	1.02836	1.01997	1.04975	1.02175	1.09625	1.029	1.10516	1.07056	1.14432	1.16812	1.13878	1.1236	1.09707	1.13448	1.1547	1.14355	1.13083	1.19263	1.17969	1.1363	1.22107	1.16905	1.14222	1.19484	1.14895	1.27705
						1.32155	1.18166	1.28512	1.39625	1.34788	1.26037	1.32836	1.36345	1.35419	1.29396	1.32698	1.31836	1.22798	1.21888	1.18385	1.24514	1.2298	1.25279	1.20471	1.28104	1.2219	1.26638	1.28795	1.18653	1.21216	1.20853	1.21831	1.13259	1.11373	1.1844	1.14628	1.17104	1.19768	1.25797	1.26838	1.24906	1.22938	1.3021	1.20782	1.30053	1.29476	1.32614	1.28369	1.29451
						0.700827	0.709343	0.705226	0.685472	0.700139	0.679292	0.663429	0.693425	0.659721	0.713621	0.702539	0.763076	0.775596	0.75603	0.753811	0.722152	0.751768	0.760061	0.797513	0.810896	0.826418	0.841918	0.836221	0.827076	0.787714	0.780847	0.801691	0.781053	0.784589	0.769935	0.791249	0.803468	0.808854	0.804666	0.770141	0.811167	0.78743	0.793573	0.788098	0.794645	0.790337	0.782028	0.790847	0.790625
						1.04346	1.04745	1.08823	1.1232	1.25886	1.24325	1.2975	1.31365	1.34874	1.37146	1.31536	1.31943	1.3254	1.28481	1.20976	1.21922	1.22221	1.21005	1.24796	1.30847	1.30266	1.32023	1.33321	1.27363	1.20666	1.17211	1.26181	1.2619	1.35952	1.38764	1.35467	1.35141	1.42166	1.38652	1.40121	1.403	1.3531	1.36795	1.33574	1.25183	1.2733	1.26474	1.28505	1.31097
						0.634586	0.667759	0.665807	0.676202	0.676529	0.709967	0.710255	0.730282	0.71476	0.703389	0.712028	0.721502	0.728998	0.693778	0.707956	0.723179	0.724728	0.7301	0.722427	0.708811	0.731957	0.719342	0.687758	0.737992	0.729468	0.728492	0.712302	0.720969	0.720309	0.71805	0.735228	0.737963	0.722818	0.739524	0.772796	0.786972	0.768773	0.781001	0.763024	0.757504	0.776645	0.771111	0.761305	0.779963
						0.835494	0.914422	0.97178	0.995484	1.10779	1.08804	1.13246	1.15327	1.2544	1.27486	1.28352	1.30675	1.2743	1.21145	1.24123	1.15665	1.20268	1.07145	1.04689	1.02435	0.966928	1.09257	1.0198	1.03824	1.17407	1.15132	1.17781	1.30825	1.38091	1.47449	1.36103	1.50558	1.37931	1.56998	1.5709	1.59967	1.51094	1.51456	1.52116	1.48405	1.45337	1.55974	1.59033	1.4662
						1.47182	1.44904	1.60539	1.63952	1.72897	1.75982	1.75645	1.7344	1.71566	1.76424	1.79136	1.71652	1.67218	1.68172	1.64651	1.65232	1.7083	1.68033	1.74284	1.77812	1.82184	1.7623	1.74336	1.75676	1.778	1.81331	1.83196	1.85443	1.8821	1.87659	2.02603	1.97806	1.92199	1.95172	2.05423	1.94395	1.9281	1.98633	1.94941	1.91196	1.92547	2.1129	2.1182	2.07953
						0.704585	0.73267	0.70353	0.71066	0.754795		0.750861	0.760376	0.764985	0.762287	0.742454	0.715799	0.71503	0.67584	0.664712	0.674978	0.668114	0.674547	0.699911	0.723385	0.757403	0.813487	0.82516	0.847499	0.834288	0.83742	0.856851	0.858253	0.827389	0.823876	0.825771	0.82513	0.85943	0.844948	0.892863	0.891539	0.914742	0.905883	0.971029	0.999324	0.98162	1.01973	1.00171	1.03447
						0.714982	0.727268	0.700685		0.718507	0.709008	0.733749	0.717235	0.711345	0.708497	0.725405	0.728731	0.720812	0.705773	0.707654	0.729238	0.735127	0.740518	0.771316	0.791723	0.807377	0.827928	0.86352	0.9159	0.91047	0.963386	0.976183	0.964069	0.990137	1.03313	1.09368	1.11015	1.13493	1.13471	1.13351	1.13574	1.08419	1.08424	1.08035	1.02969	1.05547	1.09163	1.1031	1.10778
						0.692915	0.755984	0.760322	0.764499	0.770421	0.858434			0.808144	0.829121	0.793522	0.753927	0.726172	0.694273	0.676204	0.650393	0.702368	0.707551	0.75494	0.819325	0.831655	0.849907	0.792264	0.749591	0.715933	0.680089	0.645919	0.627921	0.628514	0.630166	0.638866	0.677712	0.710994	0.706783	0.732904	0.732396	0.765114	0.745558	0.772246	0.783808	0.773545	0.779153	0.766189	0.733249
						0.884551	0.904045	0.923962	0.920185								1.2605			1.13254	1.16172	1.50404		1.314	1.47153	1.36132	1.33636	1.30948	1.46549	1.32229	1.22301	1.30983	1.27813	1.25161	1.35955	1.31691	1.26594	1.43507	1.53388	1.5523	1.40992	1.49571	1.4378	1.57467	1.44604	1.57689	1.36421	1.39661	1.36329
						1.16767	1.18125	1.29148	1.23524							0.965506					0.926987	0.934684	0.999546	1.03428	1.10225	1.15625	1.19742	1.2504	1.43742	1.38027	1.37293	1.32195	1.39744	1.42581	1.54313	1.54707	1.58	1.59409	1.59584	1.60903	1.55027	1.55437	1.48466	1.44439	1.31715	1.28473	1.25926	1.27069	1.25536
						0.349039		0.728024	0.822207	0.839249	0.92118	0.90075	0.829226	0.979581	0.918815	1.0531	1.03675	1.02528	0.982644	1.01436	0.996942	0.915003	0.957029	0.999119	0.994682	0.950998	0.92497	0.846623	0.815452	0.820159	0.821777	0.833376	0.85537	0.934562	0.984694	1.03834	1.05871	1.11622	1.17533	1.18523	1.22453	1.18661	1.21996	1.18428	1.1772	1.18476	1.15867	1.1465	1.18651
						1.44705	1.47387	1.43448	1.41628								1.34436	1.34036	1.34428	1.31221	1.29975	1.29623	1.20019	1.14533	1.17099	1.17526	1.13723	1.16878	1.18352	1.12167	1.13825	1.0822	1.12408	1.04665	1.01084	1.00896	1.0188	1.01583	1.05192	1.03856	1.05704	1.1002	1.06391	1.11652	1.14566	1.14949	1.11672	1.13055	1.04883
						0.887543	0.922221	0.909052	0.926781	0.948475	0.940192	0.963668	1.00476	1.0218	1.05311	1.04251	1.04202	1.01144	1.00604	1.01033	1.01949	1.00853	1.01399	1.01376	1.05356	1.07015	1.09183	1.08648	1.08354	1.06524	1.06143	1.07646	1.07999	1.07978	1.08548	1.09734	1.12904	1.14222	1.13545	1.17741	1.19298	1.21978	1.21039	1.20735	1.1912	1.20058	1.2046	1.21959	1.2594
							0.923171	0.958751	1.01584	0.995213	1.02169	0.999239	0.998857	0.998662	0.950395	0.939001	0.930625	0.926263	0.917769	0.883538	0.871811	0.88071	0.880605	0.873455	0.870933	0.907177	0.881278	0.912742	0.927949	0.961573	0.958906	0.949386	0.948335	0.930091	0.953189	1.01043	1.01389	1.08019	1.05268	1.06386	1.07465	1.05766	1.08327	1.13461	1.14187	1.14053	1.08198	1.09977	1.14432
							1.10694	1.06034	1.03865	1.00753	1.03418	1.00016	1.01129	0.986307	0.958907	1.042	1.06751	1.12215	1.14854	1.18096	1.17244	1.20491	1.20448	1.08426	1.07279	0.997756	0.924706	0.802442	0.836765	0.901788	0.949799	0.933248	0.953746	1.01596	1.0175	1.05933	1.10104	1.08691	1.03743	1.02966	0.962875	1.0148	0.942183	1.03254	1.05041	1.08133	1.10583	1.09091	1.01754
							1.11464	1.07798	1.13286	1.14811	1.18574	1.12853	1.12061	1.14103	1.10045	1.11624	1.12193	1.09701	1.04452	1.02253	1.04476	0.996017	1.01318	1.00036	1.00126	1.01752	1.0687	1.06537	1.09516	1.07679	1.07752	1.09889	1.08527	1.11002	1.13151	1.16606	1.19605	1.21057	1.17731	1.16585	1.08881	1.07532	1.07238	1.06372	1.05076	1.03786	1.02588	1.03101	1.06694
							0.955803	0.975911	0.981191	1.03069	0.974326	0.985976	1.02279	0.989965	0.992181	0.987317	0.990036	1.03678	1.09151	1.11026	1.16601	1.16786	1.20689	1.15848	1.25612	1.22342	1.19673	1.17872	1.18357	1.2251	1.24086	1.27752	1.26994	1.24221	1.31963	1.35411	1.43603	1.39007	1.35964	1.27002	1.29924	1.33282	1.26723	1.27503	1.24448	1.28481	1.15703	1.11733	1.10836
							0.829882	0.726214	0.716647	0.802292	0.762871	0.813882	0.821181	0.862003	0.87223	0.882767	0.933611	0.944137	0.994128	0.944379	0.950361	0.946895	0.921848	0.899603	0.912136	0.897171	0.940888	0.971504	0.978082	1.05042	1.02966	1.04305	1.09344	1.09707	1.0881	1.06839	1.12433	1.07807	1.0658	1.04391	1.05814	1.04176	1.03465	1.01542	1.0409	1.02706	1.08967	1.07569	1.12981
							0.779586	0.84373	0.766279	0.885352	0.877949	0.855085	0.923605	0.899083	0.905096	0.927646	0.896497	0.946611	0.917563	0.881579	0.878907	0.88383	0.870117	0.920252	0.882698	0.867261	0.861986	0.861285	0.856882	0.867646	0.868904	0.85647	0.828882	0.833804	0.80817	0.809587	0.839732	0.844056	0.853529	0.856	0.873969	0.874668	0.919788	0.95592	0.943422	0.956537	0.911724	0.923457	0.919002
							0.921861	0.963039	0.983043	0.985853	1.05627	1.07404	1.06368	1.07265	1.10094	1.06482	1.10455	1.12442	1.15746	1.15584	1.17765	1.21323	1.24978	1.25819	1.28201	1.29876	1.32265	1.26423	1.3042	1.27031	1.29071	1.32231	1.33437	1.39788	1.41138	1.42561	1.51008	1.48222	1.55179	1.524	1.49836	1.52769	1.50275	1.57933	1.63885	1.77962	1.86821	1.82494	1.71901
							1.34219	1.37296	1.32452	1.38422	1.33393	1.33837	1.35163	1.2251	1.27045	1.20976	1.20876	1.23379	1.23441	1.18355	1.17433	1.19277	1.13419	1.1837	1.17058	1.18799	1.17124	1.25056	1.382	1.18487	1.40903	1.3242	1.33519	1.50242	1.59415	1.50914	1.64737	1.70331	1.91234	1.93417	1.75547	1.88402	1.75626	1.56389	1.55169	1.40777	1.33124	1.3978	1.47949
							0.570576	0.578427	0.64816	0.680993	0.66245	0.735963	0.772169	0.764578	0.81487	0.830365	0.889438	0.90691	0.917153	0.854286	0.865356	0.873088	0.864069	0.867369	0.874223	0.857329	0.866276	0.819737	0.825125	0.814773	0.815214	0.820237	0.768626	0.768048	0.76086	0.739242	0.734179	0.734266	0.743511	0.752037	0.752321	0.744713	0.758396	0.768405	0.760607	0.784546	0.785496	0.773914	0.756328
							0.993176	0.984776	0.983663	1.00642	1.01834			0.967301	0.936064	0.902517	0.911077	0.941538	0.946338	0.93176	0.956478	0.959874	1.00851	1.04992	1.03331	1.03633	1.14195	1.08839	0.98706	0.958016	0.959178	0.945502	0.960214	0.998381	1.0256	1.04252	1.10271	1.14021	1.15998	1.1555	1.1419	1.14409	1.1128	1.17578	1.19427	1.20769	1.2275	1.21438	1.16703
							0.750796	0.787421	0.782143	0.795513	0.753073	0.769413	0.724748	0.735695	0.729914	0.730905	0.707243	0.700503	0.686151	0.736379	0.70211	0.725305	0.77063	0.759286	0.741342	0.776202	0.790046	0.775732	0.802905	0.806025	0.815667	0.819757	0.842285	0.846009	0.85194	0.890432	0.936918	0.959358	1.02279	1.01496	1.01726	1.02923	1.00373	1.05688	1.07222	1.08252	1.15178	1.21234	1.24028
							1.06471	1.06129	1.14917	1.09173	1.07189	1.07178	1.06796	1.03171	0.959881	0.94891	0.953847	0.96644	0.913868	0.903232	0.892293	0.949761	0.922646	0.948117	0.968618	0.956464	1.01827	1.03539	1.03164	1.04339	1.01136	0.969012	0.971207	0.933879	0.905665	0.897266	0.873206	0.893039	0.901812	0.884619	0.893115	0.896384	0.906261	0.886823	0.891331	0.898071	0.894636	0.904808	0.861982
							0.847154	0.911278	0.974071	0.957947	0.987339	0.979143	0.963814	0.992793	1.02713	1.01412	1.08382	1.0896	1.08957	1.11673	1.15646	1.18819	1.20536	1.05142	1.05482	1.06118	1.10543	1.12799	1.09991	1.09478	1.08565	1.07929	1.07895	1.07974	1.05215	1.11921	1.09171	1.09767	1.13006	1.14957	1.10953	1.02145	0.949802	0.956174	0.914055	0.909297	0.924049	0.920785	0.936986
							3.13946	2.6614	1.67673	1.58437	1.40985	1.90732	1.48779	1.47344	1.44501	1.3622	1.29416	1.32838	1.38686	1.35372	1.45329	1.46352	1.46152	1.53461	1.62177	1.75229	1.64139	1.54594	1.59578	1.61481	1.70712	1.62319	1.83634	1.80819	1.75938	1.81522	1.68935	1.80619	1.74074	1.70339	1.71433	1.66038	1.6645	1.63268	1.65866	1.5718	1.6576	1.45065	1.63937
							1.44843	1.12116	1.27053	1.34705	1.31283	1.27451	1.3313	1.27906	1.42103	1.26439	1.13098	1.2088	1.24457	1.18784	1.24472	1.22656	1.26103	1.21161	1.22844	1.25145	1.22941	1.20436	1.20771	1.20159	1.24275	1.22317	1.26161	1.24904	1.29666	1.2807	1.28256	1.28585	1.34715	1.31542	1.32013	1.22949	1.28108	1.30588	1.28405	1.24919	1.43262	1.22627	1.31449
							1.20295	1.29283	1.36729	1.26118	1.22163	1.29023	1.23032	1.24005	1.24613	1.33628	1.19398	1.14925	1.12344	1.05963	1.08598	1.01899	1.00305	0.980089	0.979235	1.00002	0.962835	0.989974	1.00843	1.00966	1.11834	1.0909	1.10564	1.16978	1.21842	1.19155	1.21037	1.24277	1.19203	1.18627	1.23558	1.22926	1.31752	1.37991	1.40839	1.39198	1.44323	1.39564	1.37953
							0.744965	0.799175	0.782502	0.782135	0.781658	0.802749	0.815133	0.826384	0.784219	0.752808	0.730353	0.713288	0.682855	0.635462	0.652898	0.662116	0.679693	0.682969	0.700673	0.708568	0.740257	0.735638	0.737727	0.760014	0.766522	0.755375	0.791792	0.773435	0.78346	0.779833	0.791049	0.813663	0.824038	0.87266	0.881398	0.898965	0.931985	0.917269	0.959757	0.995817	1.03321	1.07043	1.07467
							1.00065	1.11702	1.08061	1.0349	1.04984	1.05361	0.946379	0.964511	0.972156	0.917022	0.929052	0.924093	0.883303	0.870265	0.8509	0.80674	0.777025	0.786361	0.817313	0.874467	0.885197	0.929826	0.955256	0.935762	0.970233	1.01277	1.00532	1.00548	1.01786	0.999171	1.00275	1.04502	1.09434	1.11046	1.13105	1.20488	1.24389	1.25126	1.21019	1.16925	1.11959	1.13074	1.11892
							1.0622	1.24995	1.12013	1.09095	1.15825	1.2256	1.26226	1.26904	1.28962	1.2519	1.2795	1.26283	1.25203	1.27988	1.29486	1.26617	1.27665	1.32951	1.34089	1.39868	1.36788	1.35139	1.44298	1.4188	1.47868	1.50627	1.48032	1.47538	1.55001	1.51842	1.51439	1.49488	1.46089	1.5238	1.54218	1.49012	1.48751	1.50422	1.55599	1.56741	1.55313	1.54964	1.55349
							1.32104	1.25849	1.26153	1.28844		1.36294		1.34862	1.31772	1.37155	1.31901	1.34803	1.36657	1.35352	1.32093	1.31965	1.27963	1.34475	1.36286	1.34867	1.33146	1.34905	1.44441	1.44758	1.45862	1.5157	1.44195	1.48982	1.49022	1.48096	1.51529	1.65082	1.64542	1.52648	1.75362	1.64976	1.61814	1.63887	1.64592	1.58687	1.69315	1.63082	1.64987
							0.920217	0.899442	1.03232	1.03867	1.01168	1.0462	1.03741	0.990264	1.01135	0.983182	1.03969	0.97346	0.981634	0.973927	0.921187	0.953624	0.925107	0.942093	0.924454	0.950549	0.950326	0.955915	0.950627	0.999466	1.03537	1.06452	1.03114	1.05767			0.970352	1.09246	1.02444	1.01378	1.02648	0.98826	1.01793	0.995612	0.954724	0.962593	0.983975	1.04275	1.08389
							1.08687	1.16259	1.13027	1.17327	1.21907	1.13593	1.19442			1.14685	1.19679	1.13031	1.09709	1.08404	1.06014	1.08431	1.07501	1.10154	1.11011	1.12662	1.13129	1.10814	1.09923	1.06438	1.05304	1.07981	1.10429	1.14182	1.12677	1.11749	1.08509	1.07292	1.07772	1.0419	1.06637	1.058	1.05458	1.08171	1.11087	1.12453	1.14879	1.08108	1.17515
							0.692213	0.622376	0.595452				0.590719	0.629703	0.590577	0.633506	0.608501	0.613159	0.593351	0.584336	0.582648	0.603929	0.585413	0.592899	0.58727	0.618461	0.60285	0.651433	0.622263	0.662089	0.67284	0.693161	0.692625	0.692325	0.679005	0.741291	0.723371	0.712223	0.723729	0.707455	0.715865	0.718286	0.721173	0.732097	0.753793	0.780191	0.784576	0.862365	0.83292
							0.715062	0.812562	0.846962	0.918423	0.948309	0.966531	1.00542	1.0589	0.955469	0.876035	0.776218	0.750782	0.762369	0.771048	0.819028	0.859248	0.93457	0.936276	0.975704	1.079	1.0708	1.10591	1.11371	1.14091	1.08832	1.09834	1.03362	1.03411	0.959353	0.958428	0.876949	0.894713	0.841875	0.815383	0.808773	0.805919	0.808697	0.848041	0.867711	0.865806	0.931648	0.923916	0.941266
							0.955277	0.962874	1.15637	1.23017	1.13826	1.30244	1.30248	1.36432	1.35573	1.43334	1.47878	1.53321	1.48742	1.55353	1.50144	1.50604	1.43791	1.34176	1.28935	1.29317	1.29609	1.304	1.34223	1.34123	1.41245	1.4724	1.52746	1.50775	1.4824	1.4397	1.35825	1.26609	1.17207	1.17783	1.16882	1.14958	1.13441	1.20184	1.20849	1.24902	1.27842	1.24696	1.2978
							1.06946	1.13692	1.00107	1.01502	0.963155	1.02135	1.03979	1.01861	0.977037	0.971055	0.962689	0.940272	0.91423	0.878429	0.835414	0.886938	0.862342	0.833737	0.843346	0.852145	0.845012	0.832531	0.839794	0.867761	0.824207	0.754657	0.781189	0.694255	0.725329	0.700786	0.687157	0.656525	0.653625	0.665984	0.630608	0.633	0.643415	0.658694	0.651502	0.614491	0.652755	0.566321	0.568928
							0.45627	0.513788	0.50231	0.490632	0.500989	0.464219	0.450399	0.470897	0.500322	0.510586	0.529171	0.5348	0.532638	0.543034	0.518043	0.5404	0.558642	0.579606	0.57628	0.599598	0.572698	0.617486	0.617568	0.651619	0.646222	0.573147	0.663833	0.63688	0.613841	0.556373	0.591986	0.561435	0.584127	0.616172	0.616102	0.621032	0.602909	0.62169	0.645939	0.671767	0.625597	0.680372	0.685699
								0.806478	0.857436	1.02606	0.866271	0.931344	0.949217	0.917739	0.912203	0.998298	1.19255	1.26867	1.2043	1.28253	1.30338	1.2499	1.15578	1.03019	1.01119	1.0725	1.10129	1.14506	1.24051	1.33264	1.30826	1.39618	1.34959	1.4712	1.44553	1.47439	1.31725	1.22393	1.18744	1.28062	1.3123	1.28445	1.42877	1.55247	1.5199	1.69996	1.84664	1.7494	1.82226
								0.584729	0.659862	0.660236	0.647428	0.788068	0.794005	0.826935	0.840582	0.86441	0.803426	0.785163	0.722976	0.710482	0.685168	0.676469	0.680141	0.634755	0.697343	0.734772	0.751644	0.785034	0.807574	0.805933	0.77943	0.750348	0.706304	0.719727	0.706904	0.686602	0.687823	0.677558	0.710988	0.738345	0.766529	0.799638	0.816069	0.804334	0.802013	0.818575	0.786338	0.794945	0.800536
								0.967242	0.939517	1.05313	1.01477	1.04211	1.15035	1.17705	1.21189	1.19911	1.1834	1.17109	1.12297	1.05397	1.023	1.00349	0.954797	0.923736	0.947309	0.98399	1.01395	1.05225	1.0876	1.13666	1.14066	1.14759	1.18568	1.20848	1.18941	1.20691	1.24819	1.26692	1.28236	1.31488	1.32685	1.38204	1.28664	1.31577	1.2863	1.30113	1.32982	1.33157	1.29462
								1.08223	1.39547	1.60195	1.48467	1.44006	1.62377	1.70922		1.78912	1.59701	1.63261	1.53095	1.4676	1.41617	1.47927	1.43229	1.39311	1.43461	1.46967	1.48321	1.54692	1.61652	1.61806	1.69101	1.72275	1.78208	1.80174	1.85821	2.05843	2.07201	2.11631	2.21867	2.16027	2.17022	2.16878	2.15829	2.17429	2.29071	2.2126	2.23355	2.20925	2.16311
								1.40653	1.28735	1.802	1.63447	3.19842	1.56294	1.67218	1.92657	1.80516	1.72757	1.52925	1.53141	1.40603	1.41866	1.39492	1.34007	1.40764	1.38453	1.28127	1.37709	1.40315	1.40832	1.50455	1.55313	1.47312	1.60817	1.4526	1.53186	1.77336	1.60011	2.06447	1.68933	2.37956	2.21956	1.55478	1.47076	1.41938	1.76777	1.44262	1.50076	1.4463	1.40617
								0.741768	0.728468	0.733218	0.719102	0.711969	0.703945	0.693407	0.675763	0.683034	0.671628	0.663171	0.622775	0.638091	0.568042	0.586544	0.60044	0.624828	0.614314	0.644668	0.643198	0.658131	0.631307	0.642562	0.673645	0.683737	0.713804	0.749099	0.75483	0.794022	0.781425	0.780051	0.793561	0.798573	0.806839	0.882399	0.878734	0.926406	0.89514	0.87003	0.881587	0.89161	0.889605
								0.979843	0.949236	0.923362	0.995029	1.01936	0.971392	0.930195	0.911789	0.901899	0.967597	1.0233	1.03022	1.05101	1.07672	1.05592	1.07072	1.11427	1.13214	1.08897	1.09196	1.02118	1.00759	0.977715	0.973462	0.984075	0.963191	0.998508	0.996753	1.01867	1.06956	1.11034	1.15896	1.21875	1.27092	1.28331	1.281	1.26872	1.27049	1.21481	1.19134	1.16651	1.20519
								1.40121	1.50516	1.62721	1.70823	1.45741	1.57424	1.50563	1.53011	1.4027	1.39457	1.39055	1.25409	1.25847	1.28146	1.23946	1.26335	1.20665	1.23725	1.22519	1.29816	1.30309	1.35722	1.40413	1.36213	1.35244	1.38887	1.35088	1.39602	1.43166	1.35544	1.34106	1.29806	1.27425	1.29013	1.3184	1.28018	1.30519	1.37088	1.29312	1.34456	1.25786	1.32749
								1.35781	1.41258	1.37545	1.472	1.4166	1.47632	1.52313	1.59758	1.55222	1.54191	1.46086	1.57556	1.54413	1.52855	1.61899	1.62345	1.59368	1.68917	1.82566	1.75602	1.85725	1.68568	1.75963	1.77917	1.86371	1.79108	1.9198	1.74295	1.67262	1.59168	1.58899	1.59623	1.5758	1.65047	1.72625	1.72614	1.72352	1.8289	1.72783	1.90217	2.02919	2.03482
								0.731829	0.82176	0.864928	0.867284	0.897498	0.919715	0.979713	0.959464	0.937163	0.957483	0.952679	0.894922	0.850045	0.815477	0.824295	0.827972	0.780977	0.776924	0.70301	0.712357	0.666439	0.663337	0.721637	0.739874	0.788376	0.843307	0.864023	0.962261	0.951326	0.951011	1.02055	1.04072	1.08649	1.14011	1.19434	1.25133	1.32624	1.33876	1.41696	1.49691	1.47483	1.52449
								0.896417	0.949063	0.959735	0.985468	1.0797	1.00066	0.935259	0.932292	0.983141	0.978612	0.99704	0.921509	0.987605	1.04137	1.08677	1.07281	1.09611	1.12505	1.10709	1.18578	1.20511	1.21711	1.16726	1.1746	1.23486	1.26561	1.28021	1.31925	1.27637	1.37336	1.37325	1.35347	1.39251	1.48092	1.43266	1.46056	1.51598	1.47673	1.51412	1.51168	1.44895	1.47767
								0.730992	0.722314	0.696736	0.686121	0.655566	0.628683	0.588783	0.57456	0.55076	0.545567	0.545666	0.518164	0.508845	0.524603	0.505276	0.51459	0.521343	0.499876	0.511023	0.52098	0.526145	0.512977	0.522462	0.533729	0.527454	0.537311	0.530777	0.540693	0.537996	0.551378	0.554203	0.5414	0.536433	0.561642	0.600176	0.619065	0.599007	0.594391	0.626495	0.625715	0.630774	0.627711
								1.09127	1.08063	1.10604	1.0906	1.11725	1.10013	1.06976	1.00337	0.92545	0.93025	0.94138	0.983884	1.02743	1.08048	1.0809	1.13319	1.13715	1.19719	1.23662	1.28782	1.25573	1.27523	1.19938	1.15365	1.14858	1.09997	1.01069	0.993274	0.94128	0.926392	0.87027	0.821069	0.801086	0.801919	0.773368	0.7893	0.792996	0.777722	0.796247	0.761814	0.796314	0.774828
								1.401	1.18344	1.30624	1.31764	1.3411	1.3087	1.2896	1.37949	1.33173	1.34131	1.30801	1.26421	1.27651	1.28239	1.33318	1.3687	1.32864	1.24042	1.25698	1.21396	1.22658	1.21719	1.21948	1.25449	1.2322	1.30987	1.33514	1.34417	1.3261	1.45002	1.40338	1.45171	1.48446	1.53439	1.54603	1.58103	1.50357	1.47376	1.42851	1.44538	1.52205	1.47901
								0.980949	0.923393	0.973901	0.940402	0.995278	0.954204	0.895313	0.864092	0.855932	0.805484	0.815125	0.787036	0.799619	0.77801	0.79441	0.846574	0.910901	0.959526	1.00612	1.02895	1.03317	1.02208	1.00468	0.988985	1.00594	1.01651	1.05883	1.08524	1.07569	1.12567	1.18944	1.16676	1.16508	1.16266	1.11336	1.08972	1.08427	1.07818	1.06664	1.00659	1.05334	1.02984
								2.43375	1.6313	1.56454	1.52025	1.57778	1.54722	1.67006	1.57989	2.21383	2.65179	1.91064	2.06171	1.7736	1.96731	2.49723	2.22766	2.4024	2.34155	2.45244	2.63367	2.48718	2.63712	2.24211	2.39179	2.62341	2.51647	2.42914	2.99646	3.07965	2.54263	2.85378	2.8647	2.94582	2.48447	2.68171	2.11683	2.08482	2.3257	2.03543	2.25437	2.03313	1.78444
								0.895546	0.872253	0.854856	0.82792	0.819954	0.870431	0.855111	0.880712	0.919797	0.887618	0.923125	0.934969	0.988827	0.958352	0.919157	0.939194	0.944597	0.939461	0.93261	0.920073	0.934077	0.917689	0.873463	0.883821	0.89966	0.876925	0.888976	0.932865	1.00962	1.05838	1.03515	1.06956	1.0722	1.07015	1.08861	1.12716	1.10064	1.15666	1.14748	1.16849	1.17969	1.30788
								0.951171	0.915124	0.859577	0.848958	0.840937	0.823303	0.825494	0.81983	0.861591	0.890879	0.915047	0.920849	0.917392	0.869638	0.915538	0.894908	0.880335	0.906148	0.904685	0.954288	1.00021	1.03251	1.06631	1.1069	1.13302	1.17203	1.23273	1.23778	1.25754	1.31544	1.3706	1.40481	1.4322	1.45298	1.4606	1.4733	1.49397	1.41825	1.39785	1.40072	1.34485	1.37733
								1.62256	1.63555	1.56949	1.34948	1.56134	1.66915	1.69433	1.68095	1.53379	1.22302	1.34968	1.63264	1.46687	1.45663	1.45508	1.515	1.59457	1.39895	1.38149	1.49252	1.45592	1.58013	1.49636	1.45362	1.33596	1.41787	1.45841	1.42297	1.57698	1.59217	1.62901	1.6069	1.46416	1.4096	1.36818	1.34815	1.4093	1.34886	1.30681	1.29319	1.4067	1.39475
									1.13322	1.08041	1.06669	1.06806	1.09203	1.15161	1.18223	1.1465	1.1201	1.13354	1.12574	1.06003	1.06081	1.03442	1.0779	1.11841	1.1589	1.16928	1.19826	1.25263	1.30013	1.33073	1.36515	1.44678	1.45779	1.46232	1.39281	1.42983	1.40288	1.42809	1.43924	1.49173	1.48577	1.5159	1.51167	1.52046	1.57528	1.52664	1.50774	1.54222	1.59041
								0.761385	0.822687	0.782922	0.750152	0.712359	0.683451	0.645301	0.62289	0.618287	0.618933	0.663881	0.637699	0.644031	0.610365	0.598436	0.589576	0.586103	0.619716	0.593842	0.604394	0.613061	0.609934	0.622205	0.573531	0.636632	0.622873	0.637627	0.640214	0.674338	0.668423	0.645522	0.639262	0.546585	0.628557	0.593129	0.575285	0.608701	0.594845	0.61324	0.609715	0.607783	0.623665
								0.861103	0.811838	0.768288	0.764282	0.773581	0.748184	0.720161	0.722118	0.719658	0.802021	0.745944	0.719463	0.750501	0.747665	0.74762	0.692732	0.714034	0.731426	0.807146	0.794093	0.791286	0.786574	0.803318	0.839774	0.83668	0.822017	0.788718	0.804167	0.83444	0.793912	0.810495	0.803528	0.802709	0.789816	0.808636	0.82572	0.835406	0.901093	0.930002	0.9134	0.932911	0.982482
								1.15909	1.2377	1.12355	1.27251	1.15946	1.13703	1.13942	1.10429	1.08767	1.04643	1.032	0.922211	0.936494	0.89995	0.921942	0.905159	0.999899	1.04718	1.11045	1.1433	1.2156	1.25449	1.29809	1.37803	1.43011	1.42493	1.43564	1.40902	1.41455	1.33724	1.31291	1.25558	1.22235	1.28686	1.22231	1.2263	1.24613	1.26287	1.279	1.35412	1.2922	1.33656
								1.28934	1.23903	1.34191	1.34842	1.33887	1.34118	1.39644	1.39901	1.35493	1.27961	1.2249	1.16702	1.13477	1.11677	1.12498	1.1561	1.13869	1.18212	1.16328	1.18002	1.18386	1.19312	1.15822	1.13768	1.11247	1.08089	1.09116	1.10492	1.13063	1.1604	1.24376	1.31851	1.39504	1.46146	1.42315	1.45157	1.46525	1.47344	1.48095	1.55747	1.53963	1.48441
								1.20479	1.23781	1.1864	1.26492	1.28006	1.33171	1.40484	1.47571	1.57267	1.58033	1.50792	1.59035	1.61948	1.51518	1.53667	1.46173	1.38579	1.21052	1.1486	1.24931	1.14125	1.17828	1.25088	1.30326	1.28689	1.33554	1.32398	1.40433	1.46717	1.56243	1.58406	1.64993	1.62533	1.58221	1.53275	1.5202	1.53583	1.50196	1.52487	1.49323	1.47535	1.47583
								0.744554	0.778345	0.684482	0.888187	0.82669	0.653384	0.762427	0.670346	0.667921	0.734501	0.726487	0.756434	0.734304	0.781169	0.810488	0.838315	0.804672	0.821776	0.855152	0.889805	0.851702	0.905948	0.905333	0.886677	0.871544	0.911179	0.884395	0.985293	0.957353	0.926052	0.95762	0.970254	0.93958	0.971628	0.996691	1.07473	1.04335	1.05953	1.04908	0.962183	0.994988	0.991084
								0.989562	1.02922	0.972408	1.00924	1.03616		1.11928	1.09752	1.09511	1.12109	1.23759	1.13374	1.273	1.26868	1.23993	1.38521	1.41678	1.49719	1.53801	1.38767	1.61593	1.68554	1.50027	1.69159	1.61077	1.58314	1.57584	1.4515	1.64053	1.42488	1.47509	1.14634	1.11825	1.06271	1.0416	1.06993	1.128	1.17596	1.21351	1.40861	1.38614	1.3369
								2.00147	2.04198	1.89839	1.9086	1.84266	1.69792	1.87129	1.65699	1.60805	1.46703	1.50803	1.39159	1.39611	1.41283	1.50282	1.61973	1.71585	1.68241	1.99797	2.05628	2.16487	1.65575	1.85841	1.79335	1.59082	1.55409	1.69685	1.79305	1.68686	1.76979	1.91169	1.81157	1.75653	1.93293	1.73609	1.70442	1.5265	1.60544	1.54151	1.43754	1.50236	1.70563
								0.963889	0.984809	0.97665	0.9403	0.953759			1.12946	1.18906	1.20017	1.18293	1.11966	1.14755	1.16681	1.18386	1.20507	1.21132	1.18684	1.23748	1.12909	1.241	1.28045	1.2386	1.29852	1.26477	1.29043	1.2803	1.266	1.27768	1.31059	1.37727	1.37836	1.42125	1.37173	1.30847	1.32699	1.37681	1.45568	1.50489	1.5726	1.56968	1.60826
								0.777876	0.920093	0.811491				1.03234	1.06197	1.21586	1.24632	1.2777	1.1745	1.16455	1.17084	1.17013	1.23248	1.26131	1.20926	1.19868	1.18102	1.16722	1.21174	1.2328	1.2452	1.27717	1.30897	1.35744	1.38755	1.48385	1.49498	1.59627	1.6908	1.73755	1.75931	1.74023	1.8338	1.83473	1.85533	1.86251	1.8366	1.80939	1.76056
								0.850263	0.74842		0.812442	0.86504	0.886312	0.925163	0.936055	0.913241	0.977064	0.9467	0.913106	0.873801	0.841569	0.858386	0.874218	0.913373	0.91022	0.873308	0.908789	0.940641	0.937736	0.977956	1.02594	1.0313	0.977608	1.03693	1.02247	1.02668	1.07754	1.09756	1.10709	1.0423	1.05431	1.00459	1.03589	1.0606	1.10161	1.13019	1.15285	1.18911	1.13149
								0.704053		0.745333	0.689628	0.647753	0.680166	0.699286	0.704342	0.685644	0.696431	0.703447	0.699669	0.670166	0.670399	0.670985	0.701448	0.702726	0.701267	0.724285	0.762143	0.795082	0.804474	0.838802	0.879734	0.905979	0.897046	0.892595	0.882699	0.913178	0.906538	0.899059	0.906475	0.906242	0.901344	0.943311	0.943734	0.954447	0.984183	0.966185	0.935171	0.898597	0.880327
								1.30336	1.14716	1.22586	1.45701	1.43109	1.50663	1.44364	1.4174	1.48887	1.43138	1.23918	1.50173	1.43641	1.38792	1.37329	1.40946	1.4381	1.4646	1.46402	1.47161	1.41374	1.47736	1.51434	1.51479	1.50641	1.51746	1.47662	1.51722	1.55698	1.56248	1.56573	1.57638	1.55618	1.51912	1.53333	1.44529	1.4628	1.46814	1.56352	1.55202	1.55922	1.50059
									0.917968	0.945665	1.03826	1.01672	1.00405	1.053	0.942386	0.907536		0.963442	0.959649	0.878057	0.867097	0.792333	0.86414	1.02792	0.984156	1.04935	1.18565	0.995562	1.31864	1.27387	1.25741	1.27289	1.2123	1.11287	1.16486	1.13117	1.31592	1.14649	1.15091	1.30348	1.22607	1.23542	1.2534	1.25228	1.2798	1.22126	1.18745	1.4521	1.57649
									0.954345	0.948741	0.917816	0.959487	0.985224	0.938538	0.934969	1.01207	1.09449	1.09787	1.13349	1.17916	1.09724	0.938387	0.802351	0.680217	0.633244	0.586315	0.614161	0.695105	0.767573	0.879262	0.9904	1.02374	1.0871	1.19747	1.03991	1.19757	1.1975	1.36869	1.32826	1.40342	1.48491	1.41828	1.28782	1.32771	1.28413	1.38207	1.56719	1.47572	1.3472
									0.78743	0.771085	0.772015	0.803033	0.859895	0.840667	0.877897	0.93524	1.01675	1.06685	1.04421	1.03534	1.05194	0.983413	1.05324	1.06953	1.05999	1.08255	1.11384	1.1584	1.17302	1.20215	1.20492	1.2124	1.16338	1.1992	1.1951	1.20594	1.27514	1.26098	1.30037	1.38731	1.35214	1.3784	1.40871	1.38994	1.32586	1.41652	1.43823	1.45837	1.4623
									1.24124	1.37267	1.27505	1.31455	1.34958	1.43527	1.36334	1.49282	1.37038	1.44528	1.42651	1.58738	1.38272	1.44888	1.23663	1.48184	1.43218	1.55715	1.41946	1.36319	1.29444	1.47421	1.32356	1.35312	1.46953	1.40733	1.49195	1.52274	1.5648	1.52228	1.49467	1.41503	1.41366	1.34667	1.49664	1.4676	1.4042	1.34948	1.26732	1.3618	1.28902
									1.07495	0.798399	1.13993	1.26929	1.21949	1.19177	1.18428	1.25868	1.24206	1.19859	1.18006	1.13671	1.03718	1.03159	1.02555	0.987598	0.992144	1.02124	1.04785	1.04284	1.05138	1.07699	1.14414	1.16452	1.29189	1.26501	1.33744	1.43579	1.37513	1.54293	1.63085	1.41415	1.35769	1.32045	1.33255	1.32786	1.33926	1.4587	1.48879	1.58285	1.59364
									1.00554	0.998968	1.01859	1.07767	1.11268	1.11955	1.13594	1.13904	1.13232	1.17068	1.13653	1.10599	1.06888	1.07142	1.06389	1.07068	1.06105	1.08599	1.12131	1.1276	1.13142	1.15566	1.20824	1.18454	1.1574	1.18235	1.16247	1.17147	1.20801	1.20243	1.26675	1.29481	1.32192	1.34497	1.3177	1.30838	1.32012	1.3789	1.42537	1.40284	1.42427
									0.998328	1.15583	1.16618	1.18177	1.16752	1.24653	1.2518	1.22354	1.28297	1.2729	1.23097	1.22595	1.23138	1.19727	1.20361	1.2005	1.19617	1.24441	1.23752	1.31794	1.36152	1.3561	1.38241	1.44325	1.50048	1.48114	1.59305	1.63595	1.67872	1.73399	1.75154	1.74119	1.693	1.74913	1.81268	1.75311	1.83605	1.81459	1.82635	1.78359	1.78307
									0.820112	0.819191	0.807347	0.832024	0.836158	0.827152	0.826866	0.839566	0.84734	0.884815	0.892074	0.861363	0.843981	0.858887	0.815485	0.872897	0.882474	0.918681	0.92909	0.939916	0.949083	0.96278	0.96302	0.956593	0.946675	0.972388	0.936272	0.907205	0.911169	0.895345	0.926474	0.910281	0.904694	0.919635	0.92368	0.9259	0.953889	0.914933	0.917141	0.913654	0.898125
									0.743814	0.72608	0.743021	0.746128	0.746322	0.720059	0.714172	0.707688	0.703362	0.709511	0.699774	0.673207	0.655786	0.670342	0.642576	0.645429	0.648027	0.630884	0.640795	0.631144	0.646027	0.690179	0.690364	0.708454	0.705458	0.700552	0.704065	0.688737	0.744111	0.678003	0.695672	0.719709	0.744249	0.689739	0.693424	0.717655	0.719823	0.706447	0.714656	0.724534	0.701202
									0.790411	0.756807	0.790186	0.796925	0.817811	0.792837	0.841783	0.855407	0.817615	0.817034	0.821462	0.808784	0.843351	0.852387	0.860592	0.900945	0.896772	0.896947	0.924106	0.922382	0.957653	0.963035	0.978881	1.00699	1.01242	1.08233	1.10624	1.146	1.16236	1.14834	1.18389	1.20965	1.24363	1.32794	1.33795	1.37716	1.41985	1.4399	1.43447	1.47983	1.46131
									1.1809	1.19962	1.25286	1.33866	1.37713	1.42378	1.43709	1.48378	1.57418	1.5723	1.62762	1.65209	1.64065	1.60569	1.65437	1.61578	1.6322	1.64042	1.59383	1.4629	1.28901	1.28606	1.26628	1.3011	1.2764	1.3058	1.32194	1.39226	1.42898	1.43777	1.50444	1.4992	1.45386	1.4479	1.47125	1.55091	1.54753	1.59445	1.61739	1.5881	1.58858
									1.06216	1.08034	1.00508	1.16173	1.01886	1.18495	1.3562	1.5074	1.99079	1.68893	2.09585	2.05385	2.3902	2.60265	2.72965	2.5278	2.3543	2.57417	2.37996	2.33762	2.14694	2.19362	2.60772	2.44702	3.11516	2.34457	2.56979	2.99144	2.68318	2.48059	2.61113	2.80508	2.7859	2.78425	2.78962	2.7462	2.87116	2.73302	2.74934	2.85426	2.54156
										0.815279	0.858805	0.878301	0.888855	0.879602	0.882437	0.891306	0.903184	0.883109	0.888784	0.884594	0.893269	0.903845	0.94889	0.97441	1.0111	1.05573	1.04086	1.09446	1.12972	1.1794	1.20201	1.24711	1.2559	1.31161	1.30102	1.29443	1.21791	1.28388	1.32589	1.33758	1.39896	1.41379	1.466	1.40702	1.37688	1.40774	1.38246	1.31131	1.26654
									1.78385	1.46601	1.21405	1.2165	1.21923	1.12012	1.24186	1.2141	1.2402	1.10747	1.07343	1.05196	0.915109	0.954684	0.957612	0.871651	0.829563	0.86796	0.876374	0.876482	0.952705	0.999822	1.03347	1.00534	1.04773	1.03455	1.07802	1.17159	1.22494	1.2844	1.32812	1.2992	1.37607	1.3534	1.37243	1.40231	1.42975	1.45802	1.47448	1.57012	1.50266
									0.572155	0.561584	0.586448	0.571749	0.548692	0.618797	0.581352	0.603507	0.636089	0.659608	0.684178	0.672303	0.682294	0.698544	0.746785	0.748927	0.77721	0.880093	0.943847	0.975923	1.04785	1.1216	1.08955	1.2448	1.20327	1.31534	1.28787	1.19759	1.16766	1.0474	1.00854	0.962254	1.0194	1.03208	1.04674	1.06343	0.958312	1.034	1.02267	1.02425	1.01085
									1.14665	1.29705	1.28485	1.26527	1.19109	1.12283	1.0652	0.913608	0.947732	0.877889	0.818345	0.801829	0.803971	0.785929	0.768761	0.759696	0.736815	0.722881	0.716352	0.733169	0.744128	0.723929	0.767561	0.753783	0.745325	0.794792	0.82278	0.830703	0.868429	0.854751	0.813744	0.856081	0.825057	0.830214	0.848142	0.820437	0.851674	0.885799	0.91322	0.919702	0.902219
									0.895139	0.885063	0.848709	0.812436	0.886729	0.890248	0.917145	0.874901	1.00494	1.01418	0.985012	0.949463	0.965231	0.974109	1.0231	1.01587	1.07566	1.11676	1.12721	1.19482	1.19211	1.21368	1.21375	1.17982	1.16806	1.15494	1.12201	1.16479	1.18861	1.16663	1.1925	1.26853	1.30136	1.33118	1.42822	1.4648	1.46666	1.504	1.56844	1.58729	1.59688
									1.50575	1.34949	1.41322	1.884	2.27468	2.29577	2.10508	1.88026	1.66911	1.27325	1.3334	1.5096	1.71348	1.50284	1.26056	1.50612	0.989804	0.934458	1.10776	0.943413	0.927293	0.897639	0.924876	0.890165	0.937995	0.974954	1.01117	1.04697	1.06494	1.08508	1.11181	1.13699	1.16135	1.1023	1.11725	1.11014	1.07536	1.11706	1.09045	1.10127	1.09843
									1.39531	1.36428	1.63609	1.49541	1.52134	1.51135	1.49882	1.5223	1.37426	1.43219	1.4223	1.37342	1.46589	1.36827	1.35691	1.44696	1.49337	1.44828	1.38052	1.50931	1.57416	1.39336	1.51919	1.37897	1.49225	1.41243	1.40807	1.31114	1.32508	1.26974	1.27131	1.34877	1.44517	1.36637	1.3212	1.57984	1.50332	1.58945	1.6299	1.68712	1.52409
									1.23428	1.21125	1.18337	1.20817	1.16396	1.12245	1.14261	1.15638	1.11294	1.22842	1.11994	1.13016	1.12972	1.10568	1.08795	1.06012	1.07509	1.09904	1.10006	1.13618	1.12127	1.09358	1.07673	1.0291	1.0634	1.08483	1.11648	1.13993	1.12972	1.13434	1.12842	1.10822	1.1102	1.14308	1.10018	1.19387	1.17686	1.16025	1.12009	1.13942	1.17575
									0.631158	0.679075	0.686112	0.67106	0.718971	0.706055	0.719057	0.706724	0.685321	0.699194	0.707633	0.69123	0.695637	0.706038	0.705001	0.738589	0.76767	0.784587	0.837747	0.853215	0.875631	0.890029	0.855594	0.782899	0.792327	0.802711	0.81832	0.849551	0.856283	0.829247	0.85851	0.855528	0.861594	0.899757	0.917646	0.932424	0.948532	0.985492	1.04364	1.00276	0.946701
									1.59917	1.44147	1.29999					1.57194		1.60405	1.61011	1.66941	1.82292	1.76228	1.74197	1.90954	1.82102	1.99721	1.83079	1.90583	1.87055	1.90814	1.75362	1.71155	1.66783	1.64528	1.67463	1.68963	1.75422	1.80419	1.7739	1.68891	1.77041	1.82978	1.79917	1.85024	1.79781	1.90328	1.91827	1.94189	1.9717
									0.660744	0.660182	0.698335		0.697977	0.792309	0.710161	0.746137	0.744389	0.786302	0.734207	0.742996	0.704598	0.75017	0.806343	0.845806	0.918458	1.00178	0.941913	0.907527	1.02021	1.03269	0.932129	0.898934	0.909139	0.932075	0.955872	0.948362	0.992743	1.01308	1.03069	1.08936	1.07976	1.07789	1.08314	1.07385	1.01258	1.03165	1.11885	1.12546	1.24229
									1.18744	1.29051	1.16093	1.1421					1.16768	1.01648	0.999988	1.02274	1.02789	1.00509	1.02801	1.04174	1.0814	1.09374	1.11739	1.10664	1.09535	1.11816	1.09938	1.11467	1.07756	1.07843	1.22506	1.20206	1.28656	1.32964	1.40774	1.42943	1.47422	1.44267	1.53642	1.49819	1.46586	1.41012	1.47136	1.44067	1.44279
										1.15299	0.959295	0.903008		2.20347	1.99016	2.57627		1.80026	2.12877	2.08862	1.92825	1.98927	2.10783	1.87437	1.89471	1.8777	1.7708	1.75584	1.61032	1.63576	1.63256	1.7402	1.65973	1.65092	1.63036	1.59465	1.77532	1.63317	1.71548	1.72566	1.75165	1.73239	1.81143	1.7403	1.83972	1.84234	1.82227	2.01096	1.87178
									0.872727	0.864515	1.0497	1.26082			0.683548	0.709559	0.924321	1.05198	1.02392	0.756012	0.711555	0.775359	0.788066	0.824396	0.86293	0.901598	0.902064	0.824088	0.76251	0.682584	0.623021	0.647979	0.671028	0.709534	0.755121	0.807701	0.829153	0.861544	0.844979	0.896234	0.867374	0.878195	0.904048	0.889432	0.929179	0.933336	0.9745	0.928638	0.917632
									0.863834	0.831931	0.961341	0.971344	0.896865					1.02585	1.07743	1.04845	1.01719	0.996514	1.0089	1.05911	1.06966	1.06586	1.09162	1.11229	1.10492	1.0455	1.0327	1.01121	1.04636	1.05123	1.08303	1.08697	1.11609	1.18017	1.16658	1.15703	1.22469	1.25434	1.3014	1.2604	1.20847	1.19299	1.1269	1.15955	1.15792
									1.19278	1.13545	1.0831	1.16468	1.02386	1.04317	0.946876	0.976821	0.909651					0.759745	0.760022	0.797067	0.836362	0.859766	0.874587	0.843968	0.877296	0.889608	0.884103	0.924383	0.938299	0.977229	0.991451	1.00574	1.00661	0.98281	0.98652	0.989024	0.965718	0.965024	1.0028	1.04842	1.03644	1.05047	1.04512	1.05329	1.04294
									1.43471	1.34499	1.37381		1.36476					1.30814	1.36024	1.41724	1.32438	1.4085	1.41778	1.35698	1.43685	1.47557	1.45935	1.54025	1.5219	1.52996	1.56148	1.50914	1.47915	1.50961	1.34248	1.39738	1.28081	1.41476	1.4502	1.44751	1.43341	1.4199	1.45427	1.42123	1.4399	1.406	1.2944	1.30728	1.2891
									1.59492	1.55731	1.48332	1.44024		1.18375	1.24428				1.41664	1.27086	1.38415	1.64049	2.63281	1.72529	1.83625	1.6148	1.51314	1.93711	1.82909	1.41915	1.84911	1.62291	1.5224	1.54656	1.41766	1.4026	1.3771	1.37957	1.2763	1.23066	1.25162	1.26204	1.3678	1.27017	1.27873	1.34716	1.3539	1.34308	1.30455
									1.60454	1.41751	1.45518					1.46092		1.59418		1.65301	0.853591	0.849944	0.846004	0.823177	0.857413		0.877099	0.820897	0.826043	0.906002	0.937863	0.894903	0.920671	0.960021									0.946328	1.01236	0.934448	0.88594	0.912718	0.842388	0.948388
										1.19786	0.759628		1.46431	1.33957	1.29911	1.23018	1.16	1.14538	1.12631	1.23699	1.23733	1.18816	1.14727	1.25129	1.22309	1.20398	1.21759	1.20862	1.17372	1.20804	1.13528	1.19005	1.23084	1.18421	1.13778	1.22258	1.14174	1.15537	1.14334	1.25459	1.17231	1.09856	1.23917	1.23072	1.19149	1.27685	1.26042	1.16019	1.2218
									1.357	1.09559	1.13072	1.17287	1.03646	1.14942	0.971665	1.05451	1.07763	1.38483	1.13151	1.13122	1.1311	1.16926	1.49094	1.40274	1.49267	1.62635	1.55661	1.52344	1.48006	1.54841	1.51807	1.5115	1.30107	1.42707	1.46824	1.40802	1.4292	1.3513	1.44769	1.69191	1.73113	1.4581	1.44587	1.59928	1.69088	1.72967	1.68052	1.74038	1.66917
										1.13998	1.15169	1.15538	1.23686	1.21557	1.11346	1.08614	1.03029	0.979477	0.978893	0.9457	0.9545	0.934225	0.984736	1.01995	1.08324	1.06764	1.06128	1.0467	1.08791	1.06981	1.08016	1.06172	1.06829	1.0497	1.114	1.16902	1.23952	1.20498	1.15616	1.09245	1.05542	0.990547	0.962962	1.04238	1.02772	1.06577	1.04672	1.06007	1.1188
										1.52666	1.38523	1.52931	1.49072	1.48517	1.33589	1.48034	1.46391	1.40009	1.37961	1.38648	1.34975	1.37682	1.41522	1.32796	1.3471	1.55202	1.48927	1.41841	1.42852	1.46668	1.46542	1.52334	1.38378	1.37783	1.49834	1.47618	1.44519	1.48237	1.5687	1.56371	1.54022	1.56	1.48462	1.47047	1.48647	1.58651	1.52861	1.55399	1.66641
										0.778678	0.838027	0.883387	0.838922	0.85164	0.836086	0.83024	0.912522	0.985302	0.975956	1.01236	1.00822	1.03419	1.01583	1.02185	1.02458	1.0144	1.00002	0.967797	0.974844	0.990341	1.03926	1.06968	1.06577	1.16589	1.20325	1.22579	1.28797	1.31608	1.2877	1.2784	1.2978	1.33416	1.35386	1.41385	1.42776	1.44282	1.45009	1.35402	1.33811
										3.90845	2.84413	2.82576	2.91657	2.60095	2.85809	2.4754	2.34431	2.42922	2.36503	2.43025	1.87565	1.98356	2.11076	2.18713	1.91267	1.83545	1.98755	2.05508	1.97367	1.90442	2.20691	2.24166	2.34732	2.38309	2.40959	2.20214	2.28053	2.17556	2.12431	2.04773	2.02481	1.85497	1.86303	1.78269	1.82265	1.76387	1.6744	1.80034	1.86634
										0.735218	0.72937	0.775209	0.80133	0.765428	0.781506	0.810652	0.805778	0.776556	0.773191	0.767597	0.75465	0.744461	0.750819	0.771863	0.738077	0.74371	0.730872	0.7439	0.769722	0.808758	0.815558	0.870458	0.890524	0.922492	0.973266	0.982321	1.00914	1.02371	1.03895	1.09088	1.06946	1.11188	1.12419	1.14339	1.19877	1.27214	1.29773	1.25342	1.22991
										0.807948	1.06718	1.1865	1.23366	1.23334	1.15731	1.35473	1.29412	1.4384	1.26856	1.36644	1.36281	1.22326	1.32116	1.45977	1.41455	1.39642	1.36842	1.38419	1.52429	1.63388	1.49462	1.5211	1.65382	1.60194	1.47554	1.50207	1.3943	1.37553	1.34534	1.35302	1.44092	1.42259	1.4285	1.37093	1.39319	1.78504	1.51426	1.62991	1.39311
										1.26514	1.20005	1.19146	1.27063	1.21196	1.15403	1.10364	1.02637	1.00359	0.957028	0.891504	0.902439	0.866322	0.946718	0.998659	1.07561	1.14228	1.13569	1.16931	1.14473	1.15327	1.16061	1.16007	1.14066	1.10737	1.05159	1.03722	1.0268	1.03184	0.992498	0.967175	0.948525	0.954281	0.992784	0.959842	0.968542	0.955279	0.960882	0.961367	0.997729
										0.987385	0.999792	1.00462	0.981826	1.02085	1.06048	1.04214	1.00419	0.969174	0.95268	0.893652	0.866551	0.882213	0.876241	0.873793	0.87353	0.921747	0.897564	0.973745	0.97979	1.1052	1.12155	1.10614	1.20242	1.23886	1.19827	1.17247	1.15331	1.12984	1.16209	1.16018	1.13018	1.17569	1.08631	1.0905	1.07683	1.1684	1.18357	1.20239	1.19781
										0.636041	0.70021	0.773978	0.77524	0.770771		0.757222	0.755731	0.738883	0.730663	0.69541	0.66804	0.628008	0.632395	0.683783	0.698125	0.670739	0.700328	0.717643	0.668646	0.706527	0.683066	0.680923	0.68204	0.649279	0.646349	0.63304	0.631032	0.640763	0.657016	0.643418	0.618062	0.643828	0.64714	0.683919	0.688961	0.696098	0.728695	0.722486	0.753921
										0.745915	0.727049	0.750687	0.7411	0.717829	0.686621	0.576626	0.553695	0.505484	0.490163	0.511764	0.502321	0.539847	0.561187	0.57952	0.576498	0.608151	0.622447	0.617564	0.649617	0.645288	0.662459	0.695755	0.68917	0.69185	0.689138	0.671522	0.696964	0.699197	0.709679	0.714393	0.680329	0.709518	0.724314	0.725939	0.74757	0.778807	0.757863	0.772562	0.765433
										0.745313	0.721992	0.727819	0.781914	0.755193	0.75186	0.739232	0.76083	0.829325	0.845556	0.849051	0.861089	0.866745	0.885909	0.904341	0.899153	0.912808	0.873158	0.905549	0.912864	0.930801	0.924286	0.962965	0.959197	0.993209	0.992914	1.02765	1.09882	1.14768	1.16487	1.29536	1.54785	0.879345	0.824717	0.657195	0.529563	0.517706	0.570901	0.570336	0.640433
										0.897247	1.18595	1.20972	1.23711	1.19996	1.20445	1.14795	1.10885	1.20104	1.19166	1.12853	1.139	1.1082	1.15786	1.14326	1.09681	1.0967	1.12334	1.10904	1.11855	1.13991	1.17895	1.21179	1.21047	1.24474	1.20831	1.28429	1.24266	1.23698	1.1986	1.19695	1.13615	1.16741	1.11498	1.11818	1.18772	1.10676	1.05737	1.08519	1.06128
										1.05372	1.03026	1.10235	1.13679	1.12272	1.20209	1.22511	1.27228	1.24236	1.20981	1.21107	1.27522	1.25299	1.27666	1.28777	1.27752	1.31543	1.29255	1.2261	1.19782	1.16624	1.11834	1.12978	1.13703	1.11712	1.15279	1.1919	1.19353	1.20574	1.21562	1.18047	1.22765	1.19525	1.26928	1.18194	1.22942	1.24652	1.2143	1.25573	1.26535
										0.647814	0.728983	0.729087	0.723153	0.768726	0.735492	0.732054	0.720655	0.716365	0.729374	0.672717	0.670103	0.695421	0.679704	0.6791	0.653574	0.665516	0.667044	0.671201	0.717292	0.72453	0.748828	0.766073	0.809425	0.851706	0.871595	0.888915	0.90112	0.910139	0.896033	0.930226	0.937507	0.927841	0.914837	0.950776	0.942806	0.94104	0.994444	0.965948	0.964144
										1.30327	1.52109	1.36223	1.24998	1.32837	1.22299	1.46893	1.45138	1.29767	1.17045	1.22243	1.12942	1.1356	1.26974	1.13163	1.22417	1.32923	1.18706	1.21735	1.18582	1.37723	1.2971	1.23927	1.25924	1.28604	1.27941	1.28152	1.19669	1.2689	1.18856	1.27588	1.1824	1.21066	1.21713	1.2774	1.19346	1.18919	1.27283	1.20845	1.27943
										0.929682	0.86819	0.991911	1.04839	1.10361	1.00038	1.08113	1.10271	1.10329	1.08773	1.07621	1.04068	1.02906	1.0504	1.06477	1.12864	1.10747	1.11417	1.09214	1.09517	1.09782	1.11356	1.12085	1.09317	1.1402	1.1282	1.12388	1.11498	1.10631	1.12673	1.11659	1.14616	1.14846	1.1309	1.16699	1.1219	1.13327	1.1659	1.12543	1.13573
										0.727209	0.765774	0.858316	0.85129	0.905728	0.876976	0.85334	0.907839	0.924033	0.900655	0.884365	0.941516	0.949306	0.955321	0.979408	0.979213	1.0357	1.06232	1.05178	1.06517	1.05745	1.05251	1.00341	0.976241	0.934524	0.962398	0.995784	1.08913	1.14194	1.19237	1.27292	1.24699	1.2183	1.21271	1.22202	1.27462	1.23096	1.29433	1.27421	1.31183
										0.930803	0.897856	0.993308		0.868969	0.892705	0.953004	0.900272	0.857996	0.902123	0.867632	0.7798	0.795708	0.730827	0.804568	0.783184	0.842726	0.805261	0.768082	0.804808	0.831678	0.748437	0.78491	0.809358	0.803525	0.834463	0.874895	0.898494	0.847808	0.924662	0.839524	0.907359	0.878448	0.914319	0.993674	0.915975	0.969076	0.977237	0.969026	1.20653
										1.78215	1.33693	1.4709		1.62006	1.79723	1.80324	1.60528	1.55457	1.85907	1.84565	1.81466	1.86259	1.60493	1.87283	1.94364	1.96533	1.9101	2.01713	1.91377	1.81592	2.11861	1.90986	2.01659	1.90889	1.91007	1.97639	2.013	1.98344	2.04778	2.09233	2.21401	2.14674	2.48706	2.49484	2.68969	2.56851	2.49111	2.25978	2.30886
										1.97706	2.16912	1.86257	2.30606	1.97641	1.65539	1.89025	1.96455	1.94102	1.83207	1.95305	1.93414	1.84238	1.60075	1.47361	1.41189	1.4508	1.30115	1.39199	1.37499	1.18877	1.20465	1.25851	1.34061	1.3502	1.31786	1.19705	1.36186	1.17817	1.40449	1.30087	1.17412	1.24732	1.42247	1.32958	1.3447	1.34178	1.2133	1.34031	1.32094
										1.04309	0.959507	0.967206	1.01208	1.04862	1.03653	1.02852	1.01046	1.01729	1.00298	0.981886	0.945811	0.937878	0.884592	0.877656	0.921632	0.902002	0.857684	0.835464	0.849814	0.855478	0.895091	0.941094	0.928698	0.978696	1.04351	1.06763	1.08749	1.01629	0.985636	1.07353	1.09615	1.16316	1.18976	1.12277	1.14399	1.16503	1.22509	1.20437	1.2377
										0.925776	0.827669	0.969353	0.81775	0.910105	1.01056	1.0723	1.1603		1.08986	1.06594	1.23707	1.26686	1.20285	1.227	1.41407	1.14732		0.826815							1.16377	1.22336					1.27719	1.13447	1.52474	1.50314	1.43731	1.83374	1.41558	1.31523	1.30416
										1.06046	1.09559	1.12481	1.04951	1.03885	1.00577	0.989158	1.01817	1.00522	1.01333	1.00724	1.0363	1.12052	1.08056	1.13135	1.13904	1.0813	1.03381	1.01281	1.0388	1.11109	1.11037	1.12107	1.15777	1.20655	1.26733	1.26161	1.27983	1.25975	1.27668	1.317	1.27996	1.276	1.32442	1.33862	1.25176	1.26797	1.28659	1.1954	1.2136
										1.4433	1.42593	1.35797	1.37509	1.95905	1.37403	1.41514	1.30956	1.32113	1.34668	1.33163	1.28093	1.31575	1.29755	1.36855	1.35106	1.40433	1.33039	1.3463	1.29256	1.35253	1.37625	1.49199	1.46715	1.54942	1.50378	1.59203	1.48705	1.41413	1.62874	1.37587	1.4581	1.36003	1.3422	1.3601	1.55513	1.30512	1.3067	1.41186	1.38439
										0.731704	0.750437	0.751004	0.769793	0.735879	0.760272	0.793812	0.769118	0.795796	0.780231	0.734454	0.747669	0.80532	0.789557	0.776287	0.805476	0.802704	0.840686	0.870584	0.870314	0.884485	0.9124	0.916352	0.920128	0.915014	0.853183	1.05496	0.785466	0.738418	0.844999	0.856661	0.862633	0.813066	0.780003	0.744408	0.903028	0.827721	0.76603	0.782725	0.775598
										2.03938	2.38178	2.33903	2.6335	2.53698	3.05537	2.64559	0.805012	1.11602	1.92519	0.851736	0.978382	0.841345	0.895639	0.917545	0.851295	0.768382	0.820539	0.89961	0.73893	0.740174	0.835134	0.938319	0.822305	0.884544	0.845535	0.962715	1.01139	0.85291	0.908989	0.92665	0.913053	0.95221	0.952036	0.900866	1.00932	1.02471	1.07594	1.08281	1.05863
											1.26575	1.17844	1.22429	1.33554	1.33013	1.3445	1.52589	1.57844	1.53764	1.62644	1.643	1.68678	1.59045	1.57552	1.54012	1.49569	1.49699	1.44473	1.49323	1.49214	1.51074	1.6025	1.56145	1.62274	1.47816	1.61319	1.48811	1.49725	1.47897	1.50987	1.4553	1.49979	1.49641	1.50546	1.66583	1.59742	1.65404	1.72843	1.74375
											1.02176	1.19449	1.22705	1.25363	1.30089	1.32819	1.331	1.36101	1.31852	1.42314	1.40405	1.27773	1.27183	1.26271	1.34972	1.44443	1.47288	1.44447	1.54075	1.73912	1.72052	1.87385	1.65689	1.47566	1.53425	1.56275	1.51355	1.60686	1.74618	1.75656	1.79147	1.8251	1.86506	1.87478	1.79879	1.81173	1.81177	1.89809	2.03256
											1.01761	0.994266	0.990632	1.00054	1.01388	1.04716	1.04386	1.04452	1.09197	1.06878	1.08474	1.10956	1.11021	1.17212	1.20245	1.20519	1.26176	1.26188	1.29445	1.30791	1.30973	1.28761	1.33331	1.29925	1.27454	1.31089	1.3163	1.30679	1.37891	1.31764	1.29586	1.35814	1.41334	1.41052	1.39697	1.36209	1.37344	1.3218	1.40828
											0.760218	0.770927	0.760408	0.679288	0.680065	0.677157	0.606448	0.679904	0.620343	0.612258	0.570743	0.571721	0.600366	0.574549	0.596172	0.555912	0.588248	0.553833	0.568015	0.570449	0.55432	0.556684	0.565332	0.56805	0.597463	0.609381	0.62291	0.625163	0.624613	0.633292	0.62848	0.63354	0.631505	0.645002	0.631748	0.667163	0.654485	0.670285	0.662665
											1.33367	1.31598	1.3689	1.36257	1.34501	1.2685	1.3247	1.25592	1.23032	1.25174	1.1917	1.2684	1.27442	1.30288	1.26072	1.21491	1.27168	1.35979	1.25173	1.32901	1.30572	1.34098	1.35276	1.26973	1.23469	1.25204	1.34518	1.34753	1.2225	1.30866	1.33364	1.32296	1.40955	1.46899	1.46765	1.51018	1.57651	1.56956	1.62866
											0.706942	0.711557	0.608883	0.634715	0.845127	0.859402	0.961847	0.940602	0.953655	0.940099	0.941053	0.950851	0.969727	0.947262	0.913334	0.905213	0.925448	0.936172	0.927781	0.93706	0.937618	0.952508	1.01198	1.01276	1.04162	1.0405	1.01272	1.03645	1.04924	1.08885	1.13669	1.12195	1.12842	1.15354	1.20385	1.21094	1.1961	1.19601	1.1671
											0.453498	0.84942	1.06365	1.14701	1.22125	1.43766	1.32384	1.32187	1.26739	1.29056	1.28965	1.09567	1.07875	0.993409	0.985478	1.12343	1.22051	1.25989	1.27742	1.24728	1.25515	1.2891	1.22468	1.22241	1.28641	1.22421	1.22059	1.19876	1.29516	1.31904	1.32177	1.37161	1.29788	1.33518	1.38039	1.38658	1.43468	1.44653	1.50867
											1.54486	1.55022	1.60111	1.55562	1.53531	1.55594	1.46481	1.50727	1.46153	1.50407	1.53505	1.56719	1.44639	1.50185	1.46484	1.42857	1.46519	1.61953	1.60955	1.5664	1.63025	1.62041	1.72182	1.71322	1.6649	1.64264	1.71525	1.70875	1.74981	1.68576	1.65446	1.59658	1.70121	1.61494	1.54723	1.60539	1.53755	1.54746	1.57996
											0.689952	0.821625	0.805391	0.801747	0.858762	0.82108	0.854972	0.825286	0.836137	0.840832	0.834189	0.898298	0.863608	0.856817	0.958494	0.84701	0.894715	0.865656	1.00716	1.023	1.01553	1.03755	1.06301	1.02062	1.03965	0.973982	0.950093	0.949878	0.820888	0.777948	0.754521	0.735275	0.748025	0.713292	0.744679	0.780207	0.809675	0.841971	0.84457
											1.33036	1.35829	1.37063	1.38544	1.44415	1.41898	1.44283	1.41979	1.36292	1.30303	1.28227	1.24696	1.28309	1.26244	1.30829	1.37254	1.36295	1.36666	1.36544	1.34326	1.31791	1.33328	1.30904	1.29869	1.34668	1.26223	1.16574	1.19633	1.23075	1.2365	1.25158	1.27022	1.28717	1.28493	1.31637	1.34522	1.40809	1.41661	1.42019
											3.08534	2.20145	2.13638	2.05061	1.87554	2.37061	1.93853	2.58729	1.94874	2.23124	1.51725	1.69519	1.42894	1.55737	1.3513	1.34118	1.35819	1.33842	1.24054	1.35054	1.72671	1.33327	1.30729	1.30748	1.36179	1.47125	1.59049	1.55315	1.57604	2.00477	1.74253	1.83412	1.94969	1.64811	2.3976	2.10936	2.40801	2.64683	2.45669
											0.673912	0.684037	0.621911	0.617359	0.612406	0.608138	0.658567	0.683461	0.660683	0.673501	0.682052	0.704321	0.728037	0.734212	0.747902	0.75634	0.766207	0.778821	0.741111	0.7171	0.693422	0.694955	0.662662	0.679486	0.695899	0.700498	0.718452	0.754071	0.7437	0.734189	0.763695	0.777513	0.800376	0.822496	0.828061	0.83576	0.834778	0.797069	0.765472
											0.848079	0.811064	0.72868	0.774522	0.798392	0.836357	0.753912	0.770509	0.764177	0.715977	0.715139	0.693155	0.675863	0.674544	0.687465	0.680777	0.720163	0.709121	0.705189	0.69704	0.660042	0.688176	0.714403	0.702743	0.730772	0.772586	0.788237	0.820493	0.824704	0.839462	0.802432	0.763421	0.710007	0.731504	0.717556	0.727907	0.741177	0.766786	0.776569
											1.14584	1.12789	1.20287	1.20134	1.29417	1.30562	1.34428	1.31204	1.28826	1.22884	1.19705	1.11096	1.05662	0.975935	0.963109	0.999245	1.0042	1.05821	1.10312	1.08793	1.14439	1.19334	1.17847	1.26016	1.28646	1.3712	1.41524	1.39517	1.41657	1.35528	1.31488	1.28526	1.31182	1.2759	1.30662	1.31497	1.35248	1.33485	1.39669
											0.85831	0.90742	0.994211	0.989836	1.01255	1.042	1.04667	1.01836	0.966613	0.992753	0.964926	0.944682	0.868467	0.878542	0.893857	0.945084	0.897986	0.913805	0.932926	0.95142	0.913393	0.942784	0.906983	0.942026	0.923522	1.01361	1.00456	1.03157	1.04393	1.03604	1.03622	1.04497	1.02784	1.01705	1.00498	1.0339	1.00048	1.04539	1.01462
											1.20223	1.13768	1.06621	1.09951	1.05443	1.19764	1.02909	1.11323	1.05016	0.917419	0.872237	0.977047	0.879948	0.976924	0.96581	0.951063	0.987808	0.932266	0.951219	0.961638	0.98603	0.97813	0.937675	0.930691	0.906455	0.92026	0.905821	0.909673	0.982282	0.999868	0.981406	0.970218	1.01243	1.04132	0.990241	1.02968	1.05365	1.06216	1.05798
											1.02835	1.11755	1.11971	0.986906	1.01448	0.997256	0.984749	0.987615	0.969034	0.961587	0.962127	0.898714	0.954228	0.987834	0.995902	0.964792	0.965153	0.940493	0.932105	0.910205	0.901362	0.898752	0.888277	0.89334	0.873046	0.887394	0.89155	0.919695	0.935715	0.924813	0.936852	0.921977	0.930676	0.918763	0.933669	0.967012	0.974046	0.989261	0.99054
											0.977223	0.9576	0.9462	0.935876	0.911439	0.960718	0.955959	0.964712	0.913703	0.918824	0.899722	0.915931	0.927365	0.931393	0.958299	0.986361	1.00352	1.05091	1.05496	1.16447	1.1659	1.16551	1.22543	1.21078	1.25508	1.26196	1.26163	1.22819	1.24557	1.18114	1.14431	1.14586	1.13425	1.15293	1.13307	1.11089	1.09217	1.09699	1.10341
											0.916317	0.802024	0.824435	0.893808	0.861942	0.976389	1.02896	0.952506	1.02542	1.0389	1.02394	0.9758	1.01167	1.0038	1.04585	1.04847	0.974265	0.99834	1.02359	1.06257	1.05726	1.01742	0.961516	1.09736	1.04244	1.05436	1.03944	1.04734	1.07286	1.07077	1.00632	0.973324	0.932942	0.971679	0.921539	0.899454	1.01832	1.0948	1.14857
											0.857006	0.872189	0.791226			0.915017	0.90457	0.949863	0.955954	0.935072	0.968854	0.966777	1.03304	1.05342	1.07166	1.08868	1.08051	1.10526	1.15152	1.18416	1.15884	1.17759	1.21247	1.15299	1.17222	1.21393	1.20905	1.23809	1.2827	1.31117	1.28382	1.30593	1.28079	1.33957	1.35469	1.36189	1.32403	1.35681	1.3332
											0.639262	0.65045	0.600518			0.588798	0.613191	0.64551				0.585449	0.622854	0.650444	0.626989	0.662835	0.647155	0.627841	0.63358	0.653434	0.663219	0.647677	0.669478	0.686947	0.653357	0.653325	0.660466	0.640169	0.640154	0.633159	0.624486	0.627244	0.652812	0.676505	0.692154	0.703631	0.688799	0.70429	0.696626
												0.896531	0.888571	0.887124	0.882834	0.96028	0.965013	1.00499	0.997892	0.964551	0.994227	1.04242	1.04397	1.0567	1.08799	1.06291	1.10685	1.08744	1.04863	1.03804	1.03363	1.09015	1.03362	0.944437	0.89228	0.85383	0.851888	0.870078	0.904699	0.927695	0.930025	0.94398	0.963776	0.95456	0.957526	0.943469	0.951758	0.977454	0.973182
												1.00832	0.966558	0.903336	0.913627	0.923801	1.00793	1.02669	0.983684	1.01101	1.01853	1.05953	1.00929	1.03058	1.09223	1.08176	1.1437	1.12691	1.20439	1.27672	1.33452	1.34538	1.31201	1.32149	1.28729	1.26925	1.20101	1.16681	1.17749	1.14494	1.18395	1.18646	1.18385	1.2197	1.24259	1.31383	1.29051	1.2355	1.18797
												1.0848	1.39005	1.38542	1.25308	1.19344	1.4645	1.16518	1.13539	1.14052	1.08203	1.04427	1.10202	1.09243	1.07498	1.04415	1.11428	1.05418	1.01306	1.00655	0.982289	0.967734	0.958315	1.08007	1.13109	1.15064	1.19418	1.24422	1.21443	1.22217	1.14234	1.12713	1.13005	1.17845	1.24753	1.17095	1.03775	1.14608	1.12572
												1.12408	1.22792	1.26424	1.21656	1.19434	1.25847	1.34366	1.29656	1.22434	1.20307	1.24081	1.23068	1.26192	1.30074	1.25525	1.27916	1.33	1.28833	1.2491	1.2471	1.21942	1.2464	1.24884	1.33728	1.34139	1.43441	1.32844	1.37221	1.3834	1.46992	1.52595	1.59041	1.55815	1.58074	1.63335	1.56224	1.55446	1.55693
												0.979813	1.00865	1.05754	1.06411	1.01533	1.05753	1.00064	1.02353	0.963252	0.960687	0.948493	0.923161	0.988622	0.988469	1.00744	0.950578	0.935232	0.910292	0.883198	0.844254	0.83823	0.816325	0.843244	0.811866	0.822844	0.861554	0.852895	0.839796	0.847519	0.875245	0.869942	0.886259	0.927613	0.927386	0.969528	0.96182	1.05007	1.06243
												0.899451	1.08473	0.952566	0.948803	0.998266	1.02497	1.01079	0.998874	1.02753	1.04319	1.05791	1.03092	1.10063	1.1047	1.11155	1.11228	1.11305	1.16346	1.20816	1.25597	1.31839	1.32778	1.36731	1.32234	1.33716	1.34181	1.28719	1.26204	1.305	1.34611	1.3601	1.3655	1.32953	1.29534	1.34468	1.35877	1.34182	1.31288
												1.72488	2.00646	2.28377	2.09282	2.28559	2.26486	2.1379	1.83619	1.83155	1.88038	1.94618	1.95665	2.03124	2.09392	2.29992	2.20525	2.20615	2.4786	2.23374	2.09028	2.03277	1.94704	2.13178	2.32368	2.2556	2.37949	2.12667	2.04114	2.10712	2.22345	1.89724	1.82099	1.91713	1.68549	1.617	1.64929	1.63229	2.05167
												0.827714	0.821945	0.786886	0.844507				0.887945	0.863161	1.00897	0.948537	0.926392	0.977896	1.01022	1.03385	1.01651	1.03775	1.02076	1.06402	1.08716	1.0862	1.06909	1.08241	1.10417	1.07962	1.05998	1.03061	1.02042	1.01943	0.974603	0.973179	0.969479	1.01272	1.01835	1.00397	1.0385	1.01086	0.993236
												0.89159	0.827257	0.773884	0.774137	0.74394	0.782504	0.785493	0.769165	0.735173	0.705348	0.705975	0.715003	0.697705	0.681702	0.727881	0.727277	0.695441	0.711921	0.730726	0.707857	0.703387	0.68039	0.677847	0.668011	0.661967	0.676582	0.71533	0.72271	0.713723	0.736958	0.76653	0.76044	0.756556	0.807126	0.816738	0.79145	0.829054	0.823785
												1.29985		1.37816	1.18397	1.18924	1.30313	1.20939	1.16554	1.19928	1.2238	1.21419	1.16264	1.15744	1.22761	1.14653	1.24055	1.22547	1.30859	1.21618	1.30611	1.39262	1.39278	1.41005	1.36771	1.3823	1.34846	1.34386	1.35926	1.3989	1.34236	1.42166	1.46264	1.37237	1.37735	1.37407	1.30807	1.41526	1.3713
												1.46643	1.26176	1.19591	1.32344	1.19442		1.16251	1.20139	1.16915	1.24028	1.28591	1.31215	1.32825	1.30274	1.35943	1.33625	1.43455	1.42867	1.49643	1.58342	1.58723	1.61075	1.61735	1.60492	1.64225	1.60615	1.59944	1.43816	1.3298	1.35363	1.34734	1.4125	1.46809	1.57777	1.57163	1.57982	1.56711	1.51432
												1.6064	1.63473	1.34062	1.21123	1.13693	1.18451	1.16134	1.16839	1.04156	1.19252	1.23024	1.13533	1.17879	1.18297				1.05959	1.09543	1.0823	1.1089	1.09862	1.07718	1.10577	1.09243	1.10008	1.1746	1.23019	1.19545	1.20663	1.24843	1.26906	1.18733	1.15243	1.1507	1.13939	1.1841	1.21077
												0.946416	1.05887	0.955545	1.13209		1.12922	1.12278	1.10921	1.01621		1.0385		0.955475			0.784716		0.790126	0.813741	0.875351	0.89436	0.907967	0.933518	0.963174	0.989579	0.997021	1.01456	1.04071	1.03551	1.11924	1.10491	1.13711	1.20228	1.24153	1.24616	1.29626	1.29924	1.28907
												1.4948	1.54691	1.55562	1.62736					1.57476	1.55183	1.44212					1.26106								1.32391								1.36928	1.31459	1.29018	1.29339	1.31961	1.24627	1.3583
												0.7483	0.808195	0.773556	0.790855	0.773479	0.77683	0.795211	0.753432	0.740877	0.721246	0.746166	0.700439	0.719638	0.733852	0.732229	0.74658	0.753554	0.737936	0.757688	0.78049	0.74156	0.773066	0.755828	0.749696	0.735526	0.702595	0.725157	0.737933	0.723858	0.725374	0.726101	0.740022	0.760308	0.771418	0.760156	0.757494	0.723301	0.734958
													0.642452	0.676098	0.74549	0.717407	0.727145	0.812451	0.796969	0.755501	0.740969	0.761551	0.759822	0.747078	0.739825	0.720328	0.691392	0.718756	0.723344	0.743882	0.774442	0.8065	0.785181	0.765364	0.759463	0.736505	0.706438	0.67476	0.660137	0.644527	0.669202	0.701303	0.703448	0.701476	0.752131	0.730434	0.757725	0.794894	0.818666
													0.522526	0.528003	0.546272	0.541759	0.546761	0.528961	0.517911	0.459786	0.506578	0.479032	0.475068	0.465956	0.463642	0.457313	0.47465	0.504538	0.517846	0.540142	0.539916	0.565935	0.544755	0.558531	0.589618	0.584224	0.582989	0.547933	0.543433	0.530507	0.520432	0.513333	0.54619	0.557469	0.574347	0.580865	0.602157	0.621114	0.648262
													1.22314	1.27618	1.24121	1.2397	1.16734	1.21054	1.25269	1.21786	1.27682	1.28605	1.30704	1.2592	1.26459	1.22886	1.27041	1.20448	1.24852	1.27052	1.30857	1.2685	1.3485	1.33559	1.27242	1.28155	1.2998	1.31805	1.39468	1.40541	1.37356	1.46968	1.43069	1.51516	1.4743	1.46801	1.5032	1.50587	1.51265
													0.788014	0.790958	0.822011	0.845167	0.845307	0.849331	0.802632	0.77661	0.79541	0.794825	0.805034	0.805131	0.808949	0.838753	0.84015	0.883424	0.879569	0.884428	0.896383	0.870196	0.841142	0.852196	0.869003	0.853242	0.840365	0.844017	0.858938	0.857244	0.801215	0.791864	0.795564	0.741816	0.784065	0.77622	0.821863	0.849623	0.844104
													0.790904	0.826953	0.865262	0.907367	0.927257	0.925256	0.872627	0.825302	0.822269	0.839345	0.862462	0.902906	0.952346	1.01392	1.03837	1.06807	1.06762	1.1219	1.15254	1.18898	1.23488	1.24665	1.23981	1.24503	1.27821	1.35385	1.36002	1.3733	1.39464	1.433	1.35789	1.3539	1.30413	1.29193	1.28707	1.31759	1.34267
													0.803565	0.785051	0.879127	0.902528	0.88518	0.905773	0.911503	0.898301	0.876452	0.82841	0.776335	0.744338	0.728565	0.735425	0.728685	0.749566	0.747192	0.751386	0.74839	0.752198	0.768345	0.77941	0.781014	0.805908	0.803093	0.854562	0.882344	0.919393	0.92628	0.916395	0.894236	0.876318	0.867323	0.836639	0.828969	0.817541	0.833698
													1.63265	1.47125	2.51202	1.42111	1.54849	2.34839	1.84963	1.9484	2.35061	1.76315	1.97491	1.82795	1.8403	1.69554	1.65459	1.96983	1.7992	1.97034	1.75917	1.84894	1.85005	1.98298	1.87334	1.8937	1.80056	1.58243	1.60811	1.59537	1.54507	1.50523	1.84129	1.7117	1.52446	1.72409	1.65374	1.75409	1.53424
													1.3254	1.42482	1.59717	1.57658	1.57521	1.37637	1.3149	1.40626	1.35372	1.30836	1.31551	1.3629	1.30858	1.48366	1.57387	1.45725	1.29171	1.2917	1.25732	1.34619	1.36216	1.23415	1.42743	1.29234	1.21595	1.23566	1.26899	1.24105	1.30921	1.19751	1.20477	1.25418	1.3364	1.38637	1.21902	1.46567	1.32053
													1.19708	1.2406	1.18207	1.30225	1.26143	1.29158	1.27102	1.31028	1.34261	1.35393	1.51151	1.49916	1.51885	1.61971	1.63691	1.63931	1.67494	1.61876	1.60397	1.55315	1.47685	1.5476	1.53957	1.54053	1.55264	1.61084	1.6167	1.48782	1.50878	1.54599	1.60474	1.60026	1.62983	1.49771	1.50131	1.47974	1.45502
													1.954	1.95473	2.41235	2.49431	1.86106	1.83382	1.75847	2.48672	2.35583	1.87394	1.7704	1.71078	1.64875		1.62613	1.33132	1.39492	1.42894	1.36323	1.39211	1.3165	1.33425	1.21143	1.29521	1.24784	1.28497	1.14149	1.14732	1.24275	1.19216	1.1814	1.27134	1.28985	1.35409	1.59126	1.54929	1.64926
														0.908407	0.875233	0.949079	0.981436	1.05785	1.05713	1.02469	1.08983	1.13784	1.1361	1.24247	1.2999	1.38839	1.39754	1.40261	1.34503	1.33147	1.2952	1.29383	1.30637	1.32733	1.30119	1.30829	1.29809	1.33446	1.41932	1.47624	1.48012	1.46915	1.50224	1.4473	1.38237	1.3772	1.3093	1.2963	1.31383
														0.828344	0.78274	0.830591	0.986663	0.855875	0.831455	0.835312	0.867708	0.881693	0.933443	0.865088	0.815032	0.912609	0.970209	0.975843	0.976068	0.979477	0.993886	1.04493	1.06517	1.13029	1.08968	1.06806	1.1054	1.08552	1.07271	1.03351	0.986264	0.964286	0.987101	0.987261	0.966723	0.965573	0.948753	0.923623	0.966813
														1.41367	2.10806	1.45342	1.52024	1.64763	1.48872		1.58286	1.64044	1.86992	1.8604	1.9005	1.97854	1.92918	1.80736	1.7243	1.6439	1.64293	1.635	1.65382	1.59779	1.58139	1.5727	1.56943	1.58054	1.61249	1.61123	1.62798	1.62303	1.60528	1.65288	1.6513	1.7264	1.65569	1.74929	1.7595
														1.33362	1.35936	1.3695	1.39003	1.39267	1.35316	1.36201	1.34411	1.30195	1.26114	1.20961	1.13544	1.12464	1.14377	1.22451	1.25678	1.30348	1.2995	1.35425	1.3053	1.34435	1.39015	1.36471	1.36926	1.45596	1.45142	1.51001	1.53205	1.66222	1.54107	1.57858	1.61835	1.61109	1.60481	1.69277	1.64913
														0.724283	0.701656	0.763893	0.829246	0.826344	0.829929	0.796064	0.826837	0.812994	0.850347	0.851363	0.886576	0.896609	0.901794	0.89607	0.922914	0.892462	0.893776	0.877323	0.815868	0.846227	0.844939	0.853975	0.899755	0.916013	0.939468	0.915326	0.920978	0.909228	0.903731	0.891755	0.902479	0.895888	0.918142	0.911266	0.918372
														0.992167	0.987028	1.03174	1.0441	1.08888	1.10136	1.10874	1.04172	1.0606	1.05438	1.05211	1.05914	1.04194	1.05174	1.02901	1.01836	1.02253	1.0431	1.02018	1.00804	1.00007	1.0112	1.02044	0.987075	1.04278	1.13433	1.15737	1.14823	1.15017	1.12558	1.1303	1.18262	1.16304	1.16444	1.1853	1.22418
														1.35207	1.36225	1.4772	1.44881	1.40081	1.37284	1.41233	1.33002	1.3564	1.36789	1.45324	1.40131	1.39354	1.38157	1.32318	1.2991	1.1256	1.12838	1.12111	1.05859	1.07358	1.12947	1.3873	1.45585	1.38328	1.43544	1.32036	1.27827	1.23011	1.23679	1.2259	1.28766	1.21771	1.26008	1.26397	1.25401
														1.36927	1.28556	1.35117	1.30162	1.34103	1.24352	1.2261	1.34888	1.28892	1.32888	1.458	1.49339	1.49623	1.54245	1.54833	1.47976	1.52828	1.49802	1.4404	1.41857	1.45202	1.47283	1.46205	1.40984	1.4212	1.35147	1.30438	1.32717	1.3704	1.43064	1.46084	1.53072	1.53847	1.5695	1.56072	1.53442
														2.42601	2.0014	2.20157	2.48782	2.06732	1.88495	1.69418	1.942	1.75297	1.72955	1.44248	1.23252	1.34794	1.34975	1.44258	1.43174	1.58488	1.34913	1.53052	1.30351	1.31116	1.51422	1.4566	1.5918	1.22574	1.19276	1.23059	1.1821	1.39538	1.67177	1.48191	1.64787	1.3834	1.50779	1.47378	1.58373
															1.00207	1.00973	1.04793	1.04217	1.03403	1.05426	1.08011	1.09156	1.14205	1.18126	1.19157	1.22696	1.2418	1.21885	1.20391	1.2353	1.22009	1.19793	1.17367	1.14985	1.15323	1.07137	1.14897	1.1279	1.11988	1.12826	1.14989	1.23432	1.31526	1.33377	1.46414	1.57202	1.77766	1.8018	1.82692
														1.85915	1.87948	1.80312	1.78056	1.60905	1.56387	1.68753	1.44619	1.71766	1.66272	1.69054	1.50806	1.54976	1.63857	1.70803	1.61797	1.66008	1.51227	1.59415	1.64534	1.52532	1.68384	1.72061	1.51288	1.55392	1.64751	1.52161	1.61191	1.55158	1.42349	1.5625	1.58893	1.64801	1.55081	1.60093	1.63453
														0.972793	0.947562	0.903903	0.961493	0.94683	0.954274	0.925563	0.933029	0.914008	0.89881	0.914237	0.905979	0.907206	0.92699	0.925978	0.911424	0.910554	0.890361	0.927968	0.944414	0.919484	0.917764	0.928479	0.919669	0.908893	0.923403	0.907334	0.911217	0.898796	0.915999	0.901593	0.905041	0.923179	0.931336	0.958901	0.971428
														1.51252	1.22572	1.36658	1.39702	1.5457	1.70296	1.82286	1.8262	1.76422	1.9114	1.94437	1.9342	1.95017	1.97468	1.85363	1.75492	1.714	1.64496	1.53512	1.56249	1.71656	1.70765		0.981623	0.954892	0.721498	0.875019	1.06854	1.23368	1.35679	1.60563	1.42228	1.5405	1.50076	1.55888	1.58995
														1.04842	1.2648	1.14067	1.07866	1.08677	0.928767	1.00791	0.984901	0.990409	1.07232	1.0245	1.01132		1.10235	1.11913	1.07879	1.09432	1.13026	1.12566	1.10126	1.08413	1.09605	1.13748	1.10914	1.16439	1.18019	1.19586	1.20381	1.21295	1.22379	1.20253	1.21502	1.17028	1.18949	1.15728	1.15809
														1.83211	1.37617	1.4148	1.29247	1.5178	1.47435	1.44379	1.36211	1.59898	1.5263	1.60072	1.65694	1.54519	1.57756	1.86644	1.57455	1.66654	1.53801	1.73348	1.65218	1.77564	1.93296	1.7191	1.66127	1.5088	2.32813	1.65424	1.56664	2.77879	1.47114	2.7576	1.97513	2.69475	3.11258	2.40075	2.12413
														1.20564	1.73996	1.75138						2.79138	2.31719	1.00093	1.4041	1.46534	1.66276	1.4606	1.18918	1.63495	1.51012	1.37182	1.26253	1.09966	1.11388	1.09361	0.975684	1.00993	0.94496	0.967243	0.960366	0.949849	0.927178	0.968735	0.913461	0.983368	1.06245	1.07908	1.05758
															1.09489	1.03619	1.02871	1.00049	0.978598	0.94208	0.960501	0.947316	0.958931	0.963905	1.05233	1.07565	1.08648	1.14715	1.21868	1.28213	1.36747	1.33724	1.34333	1.32385	1.29325	1.32666	1.35591	1.3405	1.36721	1.32516	1.35811	1.35109	1.38561	1.39653	1.38996	1.39591	1.41117	1.44971	1.47748
															1.16105	1.31864	1.20909	1.20221	1.07104	1.11292	1.24887	1.10149	1.27493	1.51737	1.27861	1.16282	1.28919	1.30031	1.2622	1.32904	1.30875	1.28136	1.30909	1.32098	1.31912	1.28463	1.33784	1.31301	1.30127	1.28871	1.29482	1.30327	1.32995	1.40461	1.34756	1.33688	1.2864	1.29114	1.28017
															1.80623	1.85945	1.79206	1.80762	1.83367	1.63507	1.79063	1.74042	1.7961	1.5077	1.57857	1.59532	1.52225	1.5119	1.59395	1.59742	1.78353	1.81566	1.87933	1.87515	1.8546	1.93062	1.81601	1.77953	1.8094	1.61662	1.68778	1.64964	1.71439	1.71919	1.74559	1.71997	1.67876	1.61533	1.69958
															1.07068	1.13882	1.22984	1.14451	1.13931	1.02335	0.995422	0.928567	0.878229	0.843129	0.906785	0.83261	0.886808	0.900994	0.993768	0.994451	1.02051	1.04645	1.23414	1.16029	1.08513	1.0616	1.14233	1.19273	1.25805	1.27433	1.30364	1.46361	1.32598	1.37987	1.43247	1.4713	1.4862	1.51501	1.59476
															1.15199	1.15079	1.20914	1.36853	1.3945	1.46296	1.39543	1.37181	1.42648	1.37689	1.36551	1.35998	1.39964	1.35301	1.34418	1.37938	1.38534	1.32031	1.32267	1.3206	1.38373	1.41265	1.44776	1.44292	1.38975	1.37642	1.43642	1.47631	1.41572	1.41087	1.42069	1.49006	1.4841	1.42925	1.4956
															1.18153	1.18403	1.20336	1.22498	1.14976	1.11648	1.0324	0.987045	1.09092	1.13629	1.15073	1.1903	1.15322	1.21253	1.2176	1.23373	1.23675	1.23062	1.22258	1.22573	1.17189	1.14853	1.12279	1.10217	1.12039	1.11833	1.13096	1.08049	1.09746	1.03709	1.07662	1.04897	1.07241	1.07078	1.06389
															0.839971	0.817902	0.92817	0.929585	0.909383	0.856796	0.792094	0.849141	0.81879	0.818724	0.815384	0.828355	0.832399	0.854822	0.863831	0.893607	0.850336	0.890941	0.906435	0.915824	0.927555	0.900098	0.930628	0.941922	0.968804	0.955249	0.974087	0.938837	0.934432	0.929876	0.929718	0.940213	0.96609	1.0163	1.063
															1.36702	1.37438	1.41584	1.42116	1.55086	1.48953	1.43263	1.61467	1.51795	1.47246	1.65347	1.69211	1.65552	1.58455	1.68487	1.68177	1.81052	1.80154	1.76031	1.76945	1.73322	1.69331	1.72381	1.69248	1.72602	1.7231	1.6155	1.61136	1.68051	1.5565	1.57093	1.5724	1.544	1.44401	1.4542
															0.880495	0.84947	0.860155	0.841791	0.783368	0.730226	0.783084	0.788814	0.888825	0.860005	0.851278	0.847116	0.855654	0.836324	0.780467		0.710294	0.781973	0.731813	0.774265	0.751052	0.720272	0.765963	0.791464	0.783643	0.743267	0.774467	0.786337	0.795925	0.81117	0.836602	0.847985	0.891031	0.911985	0.948411
																1.9296	1.38683	1.34101	1.40109						0.854303		0.791668	0.830041	0.822942		0.830597	0.828439	0.839464	0.882948	0.902117	0.896637	0.883698	0.93463	0.962135	0.938345	0.991312	0.986475	0.993789	1.01959	0.97865	0.984884	0.995985	0.983045	1.00012
																1.61246	1.74349	1.58064	1.57655	1.35383	1.54007	1.66417	1.77883	1.55647	1.91353	1.71606	1.45486	1.63273	1.51098	1.64579	1.60289	1.56136	1.94321	1.73444	1.62617	1.67786	1.63887	1.93206	1.41742	1.62664	1.72906	1.54569	1.59161	1.59196	2.13529	1.5682	2.55746	1.86029	1.96112
																0.867452	0.942191	0.914064	0.904022	0.885016	0.870391	0.826579	0.900552	0.881181	0.881589	0.880533	0.932153	0.93148	0.964843	0.981777	1.02886	1.09978	1.12638	1.14424	1.17073	1.17446	1.1205	1.15387	1.24037	1.22033	1.25391	1.15953	1.2618	1.23197	1.22074	1.29306	1.33803	1.40213	1.47364
																0.659525	0.461774	0.874879	0.865592	0.849909	0.790804	0.818549	0.830833	0.85566	0.838596	0.830645	0.822196	0.836039	0.857431	0.879717	0.850485	0.842894	0.819632	0.809719	0.762628	0.761365	0.796248	0.822448	0.864344	0.955899	0.971203	1.07863	1.06516	1.06581	1.16604	1.12801	1.13557	1.14796	1.09604
																0.691525	0.692138	0.67841	0.654533	0.638851	0.634356	0.646793	0.65802	0.653413	0.65813	0.651916	0.652576	0.649403	0.630188	0.599647	0.609914	0.662532	0.680492	0.686849	0.707185	0.726186	0.769761	0.780008	0.77184	0.818468	0.828563	0.862183	0.86448	0.89941	0.914842	0.896313	0.937965	0.903994	0.943572
																0.844978	0.911755	0.984594	1.02837	0.991667	0.984951	1.00633	0.990275	1.00325	0.96771	0.960902	0.958661	0.938037	0.956072	1.01212	1.04518	1.07499	1.09255	1.12424	1.13352	1.12215	1.13605	1.12319	1.0706	1.00626	0.959478	0.977494	0.932556	0.957262	0.977478	1.02629	1.01424	1.01184	0.999386
																0.879971	1.0675	1.08909	1.1425	1.07863	1.09246	1.11678	1.16372	1.15386	1.13221	1.15709	1.16561	1.19237	1.168	1.17354	1.18045	1.17854	1.27808	1.2616	1.30642	1.32409	1.32286	1.33888	1.31959	1.34631	1.37933	1.43392	1.42174	1.47414	1.50426	1.53943	1.5709	1.58849	1.66034
																1.28562	1.14919	1.02452	1.06379	1.12177	1.06431	1.11747	1.15602	1.12952	1.32696	1.24667	1.13839	1.16504	1.19668	1.25026	1.20524	1.17706	1.17646	1.29179	1.19253	1.28218	1.25381	1.20682	1.23208	1.20091	1.28981	1.22547	1.20765	1.27474	1.15449	1.27319	1.16756	1.18617	1.25503
																0.775442	1.06848	1.06616	1.02644	1.19171	1.26406	1.26843	1.20526	1.20679	1.22156	1.22002	1.24613	1.39411	1.23258	1.31497	1.24266	1.22933	1.35057	1.30409	1.27523	1.35935	1.46339	1.35565	1.45955	1.34661	1.50241	1.36269	1.53336	1.47074	1.41494	1.43292	1.4409	1.4865	1.35719
																0.838854	0.856426	0.856817	0.849572	0.82558	0.734067	0.877034	0.899431	0.94619	1.02569	1.05323	1.06867	1.08096	1.08629	1.11112	1.07648	1.07702	1.13585	1.10819	1.12265	1.23658	1.25621	1.3237	1.27926	1.30383	1.39693	1.4411	1.39951	1.43391	1.40623	1.36527	1.39653	1.29542	1.32495
																0.536961	0.57117	0.55787	0.510626	0.499259	0.532585	0.519441	0.530993	0.529207	0.556742	0.531991	0.588448	0.592055	0.573939	0.590097	0.615139	0.579003	0.598659	0.600574	0.622272	0.62981	0.5888	0.587684	0.58912	0.61636	0.61424	0.657114	0.647532	0.667662	0.673135	0.671623	0.718353	0.748483	0.746921
																3.41956		1.96673	1.92049	1.73269	1.38091	1.32365	1.42751	1.2781	1.45235	1.33151	1.39254	1.27357	1.28208	1.25777	1.26693	1.33699	1.29606	1.49359	1.50277	1.50105	1.48131	1.52007	1.37912	1.53504	1.54752	1.57182	1.52793	1.59375	1.57931	1.59146	1.82288	1.72215	1.83682
																	0.942805	0.974346	0.963164	0.919485	0.988921	1.09792	1.15624	1.24643	1.22386	1.25254	1.24489	1.29258	1.26568	1.24227	1.23943	1.21176	1.21571	1.24286	1.2526	1.19774	1.22003	1.22272	1.31513	1.34854	1.36357	1.40721	1.43755	1.45757	1.35682	1.3497	1.36296	1.3263	1.28593
																	0.862491	0.881765	0.849317	0.80799	0.789998	0.760777	0.729449	0.71737	0.686672	0.665873	0.668515	0.694376	0.723443	0.723893	0.74484	0.749741	0.785761	0.828793	0.853601	0.861294	0.8953	0.864284	0.823817	0.797565	0.757541	0.746165	0.713435	0.712252	0.70467	0.692566	0.665551	0.681268	0.675776
																	1.21667	1.22382	1.20181		1.08042	1.00843	1.0137	0.931422	0.929828	0.91791	0.896228	0.887091	0.945659	0.951826	0.998176	1.03142		1.02813	1.05123	1.07188	0.933987	1.03697	0.971069	0.97171	1.05068	1.00444	0.990103	1.02043	1.18248	1.15894	1.13663	1.11668	1.11421
																	1.14244	1.07693	1.03414	1.12465	1.16171	1.23047	1.28072	1.27003	1.25151	1.27533	1.17431	1.10584	1.05568	1.14609	1.12302	1.13503	1.14781	1.1175	1.11857	1.16786	1.21461	1.21552	1.27206	1.28866	1.33567	1.3438	1.34037	1.37278	1.40561	1.40508	1.46511	1.50473	1.60648
																	1.22776	1.19232	1.17103	1.15805	1.18767	1.17147	1.20859	1.20772	1.1713	1.23699	1.19056	1.22462	1.23565	1.22219	1.19272	1.24968	1.29516	1.48032	1.38202	1.39833	1.70653	1.59941	1.50755	1.82489	1.83053	1.6098	1.77243	1.5461	1.62893	1.46138	1.74869	1.49429	1.75464
																	1.27598	1.29652	1.26394			1.3436	1.29544	1.41864	1.22992	1.35088	1.24934	1.30824	1.36813	1.27976	1.29442	1.32265	1.25739	1.41206	1.23046	1.24933	1.28175	1.42618	1.48759	1.4093	1.26409	1.29427	1.26512	1.1989	1.40326	1.2591	1.21772	1.24628	1.34988
																	2.37685	2.35341	2.09194	2.22292	2.09098	1.92865	2.1365	2.09185	1.99403	1.87249		1.90341	1.46686	1.60205			1.87021	1.66828	1.59804	1.5891	1.70435	1.82969	1.83541	1.80831	1.6589	1.56608	1.42723	1.65201	1.61938	1.77874	1.73334	1.90452	1.85456
																		1.45684	1.36705	1.41544	1.43316	1.49012	1.54801	1.65069	1.60411	1.63177	1.66907	1.66596	1.62061	1.68933	1.63475	1.77726	1.74075	1.79259	1.77399	1.8714	2.00523	1.94834	2.08524	1.99156	2.02217	2.01207	2.02572	2.05415	2.06767	2.0214	2.07588	2.09	2.10264
																		0.956415	0.844181	0.839144	0.796414	0.814552	0.767468	0.746458	0.8054	0.775457	0.813028	0.829485	0.810209	0.790816	0.840749	0.830696	0.883277	0.910977	0.931955	0.90193	0.924787	0.876041	0.848669	0.811799	0.86428	0.840466	0.888147	0.918674	0.967227	0.946503	0.923194	0.938303	0.962735
																		0.975838	0.983097	0.980557	0.968746	0.937264	0.97191	1.02668	1.04944	1.04039	1.04755	1.04897	1.10252	1.09637	1.13853	1.20175	1.21522	1.20045	1.15677	1.16917	1.1894	1.21179	1.25043	1.23741	1.23896	1.27934	1.27577	1.29945	1.32593	1.33651	1.31737	1.24769	1.2476
																		0.866122	0.9606	0.975421	0.967306	0.959091	1.005	1.02397	1.066	1.08897	1.09156	1.1204	1.15699	1.13666	1.14837	1.16177	1.18251	1.21332	1.20906	1.27701	1.30032	1.35787	1.38858	1.38019	1.35543	1.31886	1.34887	1.3101	1.28238	1.36361	1.36436	1.39552	1.41929
																		1.0993	1.10371	1.10352	1.05596	1.03019	1.06648	1.09068	1.10157	1.15156	1.15084	1.12558	1.0898	1.03581	1.00827	0.987972	0.981689	0.984775	0.965633	1.00229	1.03949	1.07185	1.0828	1.08839	1.14122	1.15407	1.21819	1.19845	1.23864	1.27825	1.2854	1.32146	1.37318
																		1.43889	2.01668	1.95783	2.16718	2.09439	2.12343	1.96078	1.81901	1.55986	1.62627	1.79917	1.57329	1.94836	1.6691	1.8543	2.19417	1.8541	1.62831	1.46314	1.77793	1.44956	1.25318	1.22086	1.29604	1.21692	1.45533	1.94796	2.32091	2.49023	3.00861	2.16695	2.61698
																		1.03068	1.0037	0.931925	0.857143	0.816749	0.912868	0.916381	0.998573	1.02106	1.05373	1.07141	1.05451	1.10081	1.09025	1.12736	1.14899	1.1976	1.22206	1.24952	1.28389	1.27143	1.26286	1.31058	1.25153	1.34133	1.35276	1.35274	1.31713	1.28595	1.24766	1.19983	1.12679
																		0.858603	0.88153	0.894437	0.870049	0.860459	0.889044	0.906979	0.921946	0.91375	0.911817	0.932387	0.917882	0.877166	0.837904	0.8407	0.824733	0.817435	0.842529	0.847927	0.84499	0.861839	0.863967	0.878661	0.855076	0.898684	0.866796	0.871195	0.828086	0.832324	0.772861	0.851775	0.837369
																		1.17932	1.19112	1.10227	1.14476	1.11253	1.13576	1.12781	1.18348	1.17048	1.15805	1.1269	1.06457	1.07256	1.16928	1.09677	1.12425	1.11908	1.06518	1.14066	1.1351	1.16822	1.19867	1.17289	1.16148	1.21444	1.19106	1.18	1.18355	1.16931	1.15549	1.1849	1.19717
																		0.781963		0.778498		0.850649	0.880365	0.879062	0.890965	0.951398	0.935896	0.966626	1.01717	1.06873	1.1249	1.15033	1.14826	1.14321	1.15162	1.17893	1.23245	1.30462	1.31485	1.36083	1.33976	1.32721	1.31902	1.33162	1.35335	1.3682	1.30925	1.36862	1.41714
																		1.60341	1.68605	1.95112							1.94251		1.49707	1.41376	1.40616	1.41644	1.38398	1.44612	1.42333	1.45811	1.48748	1.50542	1.51852	1.46887	1.45966	1.42077	1.4038	1.48559	1.52722	1.43173	1.46356	1.44772	1.51834
																			0.826119	0.805345	0.836705	0.902368	0.853258	0.895198	0.912205	0.906919	0.90923	0.909262	0.892568	0.88633	0.916164	0.890369	0.901642	0.907361	0.909593	0.932635	0.936266	0.953381	0.953259	0.976839	0.962102	0.979676	0.974865	0.969104	0.98439	0.987677	1.02134	1.07027	1.12117
																			1.0851	1.07466	1.15481			1.31546	1.22216	1.2857		1.22459	1.19727	1.37089	1.41398	1.34298	1.7924	1.50343	1.45029	1.51245	1.52841	1.62499	1.63221	2.02078	2.45995	1.9291	1.94738	2.1053	1.95858	1.71689	1.85155	1.82756	1.94114
																			1.04814	1.16678	1.0023	1.00448	1.12423	1.05138	1.17212	1.01835	1.06747	1.08456	1.13543	1.10566	1.03	1.05415	1.09077	1.12944	1.10561	1.07687	1.12313	1.0436	1.09052	1.06134	1.09109	1.08236	1.08809	1.08087	1.14234	1.09623	1.13817	1.17651	1.17391
																			0.740224	0.732869	0.745596	0.782667	0.771158	0.656207	0.677304		0.572557	0.693423	0.765045		0.794756	0.763888	0.774715	0.763054	0.801612	0.7747	0.777943		0.820953	0.795481	0.827787	0.860349	0.829162	0.866762	0.807152	0.815888	0.757159	0.663286	0.721007
																			1.38276	1.44383	1.3798	1.36301	1.45985	1.45104	1.4385	1.52917	1.76283	1.44994	1.49886	1.43163	1.59664	1.65627	1.54927	1.48501	1.50764	1.59369	1.50048	1.53733	1.52449	1.44421	1.44565	1.45641	1.41267	1.35916	1.41114	1.37909	1.47345	1.47281	1.49479
																			1.55582	1.59936	1.48415	1.36638	1.43854	1.37815	1.41932	1.33625	1.36239	1.32164	1.33492	1.32569	1.40648	1.39145	1.40202	1.36614	1.29089	1.27881	1.33284	1.34828	1.34967	1.35987	1.37448	1.34911	1.32507	1.37271	1.36489	1.49486	1.39958	1.20413	1.24576
																			1.58382	1.29778	1.57826						1.80588	1.90203	1.60004	1.66382	1.82783	1.86502	1.87009	1.85781	2.06755	2.40212	1.74674	1.71767	1.58055	1.64119	1.57441	1.48544	1.46371	1.47423	1.48221	1.56802	1.56578	1.6437	1.79306
																			0.941627	0.938764	0.969868	0.908031	0.938785	0.936524	0.9845	1.01505	1.0279	1.05535	1.09987	1.10731	1.14808	1.15209	1.14714	1.22237	1.18218	1.26212	1.24368	1.24569	1.23009	1.23032	1.21069	1.29985	1.3227	1.26157	1.39392	1.47148	1.5283	1.52351	1.53023
																			1.14921			1.04542	1.04484	1.07232	1.12397	1.13629	1.1116	1.0939	1.09277	1.10776	1.12878	1.16958	1.12882	1.11525	1.14091	1.12628	1.13232	1.13954	1.18116	1.18581	1.17782	1.21637	1.18834	1.20045	1.13262	1.18179	1.12562	1.18238	1.16036
																			0.803139	0.780397	0.725124	0.793703	0.82153	0.880085	0.859048	0.904926	0.958463	0.93348	0.935164	0.989233	1.00855	1.03457	1.02007	1.00364	0.995932	0.96384	1.02467	0.98678	0.975496	0.973226	0.998088	1.04473	1.09098	1.06454	1.0918	1.13489	1.08421	1.12336	1.10942
																				0.508745	0.494809	0.518419	0.525113	0.583664	0.601548	0.635168	0.668072	0.656648	0.653292	0.687171	0.642644	0.65157	0.661607	0.627249	0.649653	0.632637	0.662022	0.63923	0.66303	0.697426	0.698191	0.737837	0.776293	0.781038	0.766133	0.791071	0.818845	0.812104	0.795652
																				1.58385	1.54051	1.35402	1.34739	1.64809	1.66002	1.66411	1.67721	1.68045	1.25097	1.57101	1.37221	1.55756	1.33417	1.47687	1.16275	1.32778	1.18285	1.24843	1.4036	1.43736	1.40634	1.51055	1.56057		1.82208	1.92875	2.02008	1.99881	1.85459
																				0.81655	0.821983	0.755738	0.748806	0.714481	0.814721	0.818452	0.955128	0.907731	0.999205	1.01701	0.979759	1.02815	1.02698	1.07105	1.09934	1.1455	1.18083	1.25258	1.28041	1.38363	1.37223	1.35934	1.31973	1.28739	1.28161	1.27676	1.29248	1.27513	1.28496
																					1.5506	1.90542	1.58681	1.61579	1.45131	1.33341	1.2815	3.96091	1.71226	1.47286	1.96634	2.23623	1.48369	1.30619	1.39051	1.29271	1.30825	1.2449	1.35567	1.34151	1.4019	1.30425	1.20658	1.2295	1.22074	1.36218	1.43191	1.22797	1.37848
																					1.5197	1.63481	1.69665	1.6654	1.74169	1.70703	1.7101	1.80574	1.845	1.87321	1.91257	1.82514	1.77627	1.76186	1.83177	1.85769	1.88385	1.87066	1.965	1.99741	2.02625	2.00171	1.91841	2.13928	2.0648	2.20905	2.13289	1.97782	1.96976
																					1.17171	1.20217	1.23616	1.26204	1.28908	1.26767	1.27736	1.29364	1.19209	1.22479	1.22024	1.15038	1.1445	1.12493	1.16349	1.17211	1.23312	1.25153	1.30052	1.34387	1.3051	1.3493	1.4105	1.41531	1.39055	1.39238	1.4273	1.41772	1.3501
																					0.612734	0.660476	0.642564	0.634907	0.645112	0.661636	0.657895	0.691446	0.700692	0.748743	0.747284	0.783063	0.785495	0.791231	0.841726	0.852472	0.854154	0.846961	0.813983	0.7464	0.762521	0.78205	0.765969	0.752335	0.791648	0.791305	0.805057	0.792709	0.867495
																					0.95425	0.953377	0.981684	1.03069	1.04738		1.01155	1.07865	1.15743	1.22429	1.37157	1.34804	1.37506	1.37731	1.40862	1.41568	1.44097	1.50512	1.48194	1.38847	1.38977	1.29582	1.20243	1.18971	1.11722	1.136	1.14353	1.12183	1.13611
																					1.22103	1.23229	1.22479	1.22949	1.25074	1.25706	1.31238	1.34675	1.32808	1.30216	1.32186	1.27586	1.29444	1.26736	1.28321	1.26262	1.24272	1.3181	1.36883	1.40977	1.44839	1.46519	1.45112	1.40671	1.42742	1.40831	1.34754	1.31087	1.31793
																						0.812326	0.961715	0.997359	0.908046	1.00556	1.02197	0.982637	1.01721	1.00316	0.992381	0.96919	0.973629	0.987873	1.01581	1.03468	1.01482	1.07122	1.08522	1.15152	1.20565	1.18678	1.25268	1.1958	1.24361	1.19953	1.20069	1.19484	1.17309
																						1.08618	0.96309	0.910092	0.917142	1.13747	0.951327	1.07472	1.24222	0.978981	2.10986	2.02142	2.16677	2.47419	1.98256	2.13343	1.85607	2.65017	2.31244	1.25683	1.80071	2.14746	2.24968	2.17577	2.1954	2.30911	1.71621	1.57358	1.68091
																							1.3735	1.24158	1.24774	1.2836	1.26775	1.26283	1.24205	1.24494	1.25167	1.30538	1.35994	1.29725	1.29158	1.28792	1.27942	1.27424	1.25136	1.19926	1.23539	1.23164	1.3209	1.34767	1.38891	1.41053	1.41912	1.4815	1.45155
																						1.3818	1.36713	1.37249	1.40381	1.40292	1.38778	1.39763	1.38021	1.41484	1.37096	1.42655	1.362	1.42041	1.42619	1.36253	1.33455	1.36171	1.41699	1.49191	1.3413	1.42135	1.39681	1.41197	1.36406	1.39425	1.26124	1.35686	1.3859
																							1.29864	2.70953	2.82319	3.10328	3.32664	2.57935	2.76221	2.34493	2.76993	2.57556	2.81227	2.67967	2.39008	2.35978	2.23386	1.99015	1.64565	2.53674	2.18573	2.33554	2.56676	2.3372	2.35916	1.72327	2.13391	1.64499	3.94641
																								0.70479	0.688205	0.762637	0.767327	0.776407	0.817338	0.84113	0.8194	0.810366	0.825397	0.873164	0.94269	0.937101	0.967327	0.966046	0.952871	0.992226	1.07168	1.13649	1.17754	1.25858	1.26927	1.29054	1.30788	1.2838	1.35474
																									0.829344	0.821803	0.809446	0.835425	0.854139	0.853535	0.854805	0.849828	0.868936	0.876907	0.891055	0.9331	0.975153	0.981321	0.960179	0.940325	0.867033	0.81959	0.833656	0.838493	0.833925	0.869017	0.899297	0.887839	0.903491
																									0.643125	0.726659	0.693073		0.671059	0.685677	0.772571	0.780709	0.706128	0.823617	0.854005	0.75528	0.851656	0.839497	0.873412	0.859241	0.860017	0.768045	0.822665	0.874454	0.865954	0.88761	0.863222	0.900076	0.929794
																										0.58871	0.825501	1.32534	1.53338	1.73435	1.73446	1.7406	1.65197	1.66662	1.67087	1.59888	1.56673	1.51623	1.40602	1.35947	1.27102	1.18193	1.16079	1.0929	1.06957	1.03434	1.02222	1.00371	1.00554
																										1.24513	1.22683	1.28819	1.36741	1.25122	1.51369	1.40595	1.30081	1.404	1.45934	1.35996	1.36238	1.36584	1.39881	1.46917	1.38487	1.43398	1.31041	1.40113	1.43758	1.31252	1.36785	1.40088	1.35172
																										0.865593	0.973943	0.878694		0.91121			0.971564	0.995497	1.0406	1.08087	1.09135	1.1255	0.966475	1.21716	1.25015	1.20897	1.21769	1.24454	1.29162	1.26109	1.31407	1.2842	1.33319
																													0.824426	0.736986	0.74458	0.772367	0.749507	0.77607	0.750999	0.744115	0.73797	0.77546	0.770153	0.710386	0.708421	0.63817	0.659712	0.592798	0.605129	0.595809	0.606375	0.599782	0.574367
																													1.01116	1.00263	1.01809	1.02492	1.04957	1.05716	1.09595	1.10298	1.13763	1.14726	1.12203	1.11889	1.16643	1.23524	1.22613	1.29188	1.27713	1.24861	1.27292	1.32601	1.22047
																													0.715174	0.810229	0.796333	0.893107	0.829328	0.852739	0.869617	0.786087	0.835009	0.894996	0.831808	0.921913	0.966218	0.98376	1.01845	1.09526	1.2063	1.18715	1.21115	1.25118	1.25257
																														1.23568	1.23311	1.18236	1.12427	1.47866	1.17107	1.36839	1.26435	1.09919	1.14025	1.32757	1.15737	1.18778	1.23733	1.33649	1.26847	1.41919	1.28464	1.26845	1.56442
																															0.912541	1.02242	0.967456	0.969515	1.00974	1.00367	1.01907	1.04126	1.06211	1.08472	1.08235	1.05595			1.15317	1.17463	1.15673	1.14683	1.19971
																															1.58537	1.47705	1.50153	1.5435	1.45257	1.47605	1.42855	1.43036	1.45421	1.51774	1.48032	1.48753	1.49333	1.51398	1.5901	1.61128	1.69502	1.69156	1.70886
																																1.665	1.73275	1.73508	1.63633	1.70998	1.7998	1.77036	1.52987	1.33558	1.66561	1.70808	1.63549	1.61375	1.78072	1.66293	1.71165	1.60104	1.67816
																																	0.939535	0.95924				0.836914	0.842771	0.88818	0.89579	0.896542	0.893601	0.894684	0.942506	0.916938	0.934917	0.921298	0.969561
																																	1.15823	2.20076	1.49067	2.50567	2.1774	1.87806	1.26242	1.22606	1.21498	1.29888	1.3729	1.34751	1.36075	1.53098	1.53126	1.43547	1.47896
																																		0.956839	0.951353	0.908551	0.904712	0.872635	0.84046	0.844928				0.719129			0.827624	0.816412	0.785225
																																		1.15089	1.29547	1.28296	1.33341	1.19919	1.24129	1.13789	1.28305	1.28613	1.30365	1.30772	1.27622	1.20248	1.22414	1.18498	1.18437
																																			1.44709	1.49764	1.47856	1.47632	1.45144	1.47168	1.45109	1.49099	1.48307	1.42847	1.43211	1.42233	1.44611	1.40048	1.36968
																																			1.30597	1.30479	1.33389	1.3939	1.43254	1.2437	1.43167	1.50073	1.43766		1.46351	1.51825	1.56856	1.66621	1.60329
																																			1.30269	1.31673	1.3311	1.33633	1.39309	1.4203	1.41174	1.46248	1.37534	1.37335	1.37459	1.30022	1.37169	1.36995	1.42733
																																						1.3099	2.09446	2.56568	2.69452	2.56072	2.15595		2.13561		2.28799		2.68612
																																						1.33426	1.24418	1.33187				1.307	1.46825			1.24134	1.48984
																																							0.924911	0.949056	0.962565	0.949286	0.981405	1.01304	0.988183	1.02237	1.03592	1.02721	1.01146
																																								1.11537	1.15145	1.2456	1.1289	1.47464	1.45287	1.52266	1.62936	1.87166	1.96407
																																								0.790722	0.80351	0.761305	0.707033			0.698724	0.773875	0.753642	0.750065
																																								1.91122	1.71784	1.88058	1.96186	1.83667	1.71144		1.83358	1.64513	1.88721
																																									1.0595	1.09682	1.1616	1.2005	1.19806	1.21905	1.2174	1.2111	1.2385
																																									1.31556	1.12211	1.22403		1.01139	0.984039	1.45157	1.28483	1.35113
																																										1.41557	1.11433	1.10106	1.11966	1.23105	1.19739	1.19471	1.21155
																																												1.1792	1.25481		1.42109	1.47732	1.56401
																																													1.18298	1.25683	1.22112	1.26493	1.27567
																																													0.84167	0.868911	0.810865	0.828689	0.814334
																																														0.449939	0.562634	0.551165	0.508856
																																															1.1812		0.922535
																																																1.03703	1.00411
																																																	0.992933

Replicate 2, Treated at time point 36
0.376506	0.370874	0.389271	0.387496	0.378614	0.393212		0.478918	0.434243	0.470542	0.513312		0.556484	0.572429	0.543104	0.653953	0.593192		0.569012	0.552912	0.598696	0.590635	0.586045	0.591219	0.602156	0.612836	0.655416	0.603284	0.594192	0.571244	0.547033	0.541916	0.52971	0.542798	0.560896	0.572515	0.577991	0.615286	0.615626	0.620778	0.605383	0.585178	0.569961	0.571949	0.608511	0.615974	0.639834	0.629874	0.615081	0.628436
0.810683	0.859337	0.810189	0.819152	0.821962	0.80466	0.77215	0.769381	0.762567			0.785607			0.810524	0.897185	0.893371		0.870277	0.883184		1.04884	1.12627	1.16916	1.25218	1.36346	1.30426	1.38197	1.44381	1.41567	1.41413	1.44896	1.39267	1.37635	1.48482				1.50688	1.5498	1.50178	1.40791	1.40173	1.48036	1.44413	1.57463	1.60162	1.5634	1.62307	1.62905
0.443923	0.460294	0.615937	0.584607			0.599576														0.830033		0.852031	0.975655		1.01987	1.00046	1.03294		0.96426		0.845251	0.784906	0.741875	0.704887	0.700738	0.703223	0.721792	0.734047	0.768766	0.739689	0.76508	0.798101	0.76232	0.798763	0.818626	0.878423	0.875862	0.92377	0.969009
0.637874	0.637424	0.746424	0.604848	0.645011	0.789777		0.79541									0.736652							0.668455		0.73261	0.783731	0.77404	1.03881	0.707067	0.716296	0.804214	0.676264	0.769241	0.745806	0.819652	0.824813	0.7565	0.886242	0.780402	0.725525		0.698874			0.733973	0.617492		0.805794
0.761321	0.801059	0.761173											0.621817	0.679257	0.740193	0.674233			0.710585	0.66545	0.680144	0.67191	0.721297	0.760565	0.723904	0.776399	0.847895				0.993095	1.05756	0.991488			1.2135	1.22524	1.35093	1.35549	1.29106	1.14006	1.14094	1.04782	1.03725	1.00223	1.02198	0.974995	0.999027	1.01452
2.22261	2.08772	1.9197		1.76493		1.53582	1.41399		1.69672	1.48935		1.61879	1.40666	1.6409		1.67749				1.58	1.54693			1.67006	1.72007	1.79436	1.8455	1.71752	1.9644	1.83549	1.81768	1.86056	1.83233	1.86566	1.89774		2.00091	2.02716	2.04121	1.96234	1.89331	1.81894	1.7781	1.75879	1.71865	1.69152	1.70939	1.54703	1.53176
0.494993	0.488017	0.493905	0.508205	0.509699	0.663037		0.551725			0.541534							0.714523	0.780962	0.558976	0.59008	0.587289	0.722851	0.677717	0.816717	0.784733	0.799586	0.878775	0.963392	0.953546	0.996531			0.980531	1.03664	1.02624	1.06152	1.04719	1.02815	1.03479	1.00045	1.00606	1.01702	1.04662	0.995479	1.06289			1.07205	1.09906
0.420807	0.43726	0.422781	0.424995	0.41016	0.412115	0.406353	0.382655	0.357635	0.367129	0.403058	0.400086	0.359749		0.316865	0.303612	0.287356	0.276826	0.286868	0.284079	0.293828	0.282955	0.257789	0.262943	0.239866	0.256863	0.275756	0.274034	0.279597	0.296043	0.329148	0.364683		0.372831	0.399047	0.409245	0.386183	0.395445	0.410372	0.413915	0.377637	0.380436	0.395286	0.379239	0.376497	0.342219	0.350253	0.380604	0.39434	0.411013
0.464508	0.487279	0.505169			0.52387	0.533896	0.526999	0.513945			0.471487	0.485116	0.43706	0.44882	0.454736	0.471273	0.419046	0.422616	0.393474	0.417008	0.455341	0.451363	0.585415		0.627559	0.580313	0.599791	0.628924	0.687917			0.721108	0.714336	0.769177	0.762445	0.623426	0.690268	0.586717	0.700874	0.67013	0.62486	0.623488	0.614717	0.517336		0.553831		0.564854	0.622398
0.310586	0.313787	0.321847	0.344092	0.298103	0.306656	0.314729	0.33597		0.445186	0.495907	0.458236		0.398623			0.468003	0.41206	0.512616	0.434085		0.459245		0.474985	0.502169		0.468997	0.458305	0.564182	0.478052	0.50701	0.747272		0.587607	0.526622	0.568237	0.567603	0.567674	0.612549	0.665085	0.620926	0.608611	0.609073	0.62743	0.677485	0.59457	0.643395	0.653231
0.470443	0.465694	0.469871	0.451007		0.437114	0.452194		0.433021	0.421266	0.406139		0.451329	0.410887	0.412178	0.393088	0.383901	0.393299		0.372196	0.405666		0.400106	0.433574			0.388842	0.395938	0.410173	0.453284	0.474269	0.517433	0.538809	0.568758	0.599054	0.582355	0.617185	0.61845	0.628267	0.597135	0.588644		0.596026	0.609516	0.610381	0.645114	0.648728	0.623844	0.638568	0.648024
0.512731	0.54489	0.512159	0.522967	0.534423		0.567961	0.587158	0.63499	0.567756	0.600896	0.584408	0.535308		0.688011		0.71711	0.626638		0.582865		0.584068	0.552035			0.631995	0.586734	0.678502		0.634445	0.581688	0.630305		0.640178							0.626111			0.65528	0.655681	0.661629	0.706804	0.739043	0.710607	0.728157
0.45854	0.410295	0.408031	0.417612	0.39744	0.37126	0.415376		0.468194		0.398885	0.430355	0.453379	0.503008	0.537882	0.576106				0.668435	0.685009		0.741164	0.817534	0.773521	0.903614	0.870951	0.829096		0.87525		0.857632		0.711974	0.703178	0.68277	0.63046	0.645671	0.504888	0.629125	0.54313	0.474959	0.504265	0.522588	0.496951	0.688512		0.715043	0.628585	0.595002
0.818707	0.812784	0.886511	0.856063	0.815975			0.935967														1.05913	1.13671	1.21478	1.27369	1.29314	1.35819	1.28095	1.41656	1.58277	1.55501	1.57309	1.55918	1.62957	1.65739	1.56755		1.44847	1.39828				0.972592	0.896926	0.879879	0.861851	0.811882	0.787429	0.804153	0.855478
0.575664	0.570536	0.586883	0.529946	0.592631	0.550286	0.561096	0.649907	0.560766	0.805675	0.751106	0.755036	0.891585	0.7368	0.660259	0.942951	0.967992	1.00329	0.987693	1.07721	1.02216	1.10674	0.99403	0.989759	1.05072	1.01148	0.973105	0.882991	0.964675	0.876903	0.986317	1.13328	0.921645		0.840836		0.913065	0.968448		1.07141	1.02194
0.654569	0.804581	1.01085	1.65227	1.6148	1.31234	1.50717	1.85922	2.22606	1.88596	1.86649	2.19606	2.55629	3.80549	3.60999		3.7717	3.92193	3.31791	3.66235	3.74318	3.55351	2.65857	2.63225	3.17017	2.71899	2.76959	2.06995		2.32755	1.84586	2.52068	2.52516				3.51559	4.55153			2.80049		2.833	3.39227	3.09671	2.87411		2.78898		2.56834
0.652038	0.662602	0.591214	0.628848		0.616028		0.708645		0.833059	0.753996	0.749733					0.735529	0.770801	0.579725	0.635667	0.629842					0.706343		0.578112		0.521058	0.51825	0.494959	0.504128		0.473291			0.513596				0.502795	0.502017	0.539065	0.512662		0.549328	0.539668	0.579476	0.56727
0.590883	0.654381	0.683892	0.656895	0.747908	0.779795	0.775749	0.862879	0.895682	0.918297	0.977872	1.02862	0.902531		1.09062		1.02354	1.11472	1.16685	1.13127	1.09197	1.09454	1.20921	1.15989	1.24949	1.16974	1.13855	1.21928	1.19224	1.24268	1.30127	1.37674	1.31388	1.42875	1.41124	1.44132	1.46289	1.47873	1.5839	1.63085	1.55726	1.74433	1.83644	1.72005	1.6958	1.75068	1.72255	1.77339		1.78315
0.35996	0.385778	0.355488	0.327797	0.33491		0.334301	0.344665	0.35411	0.350066	0.450141	0.449068	0.372086		0.455287	0.44186	0.508996	0.466837	0.469654	0.47285	0.484411		0.540735	0.543476	0.577596	0.561517	0.579332	0.580326	0.598836	0.597157	0.582454	0.616324	0.652287	0.671185	0.697878	0.684288	0.71451	0.729847	0.726053	0.718388	0.652976	0.667176	0.697595	0.664227	0.620853	0.582141	0.543793	0.544831	0.501886	0.507023
0.588084	0.524012	0.519539								0.325344			0.372956	0.384272	0.388021			0.387085	0.373676		0.37882					0.410041			0.455857	0.437963	0.458322						0.948084	0.945789	0.902019		0.818357	0.787598	0.902006	0.847942	0.781941	0.786558	0.786801	0.809436	0.870475
0.340959	0.402357	0.414266	0.447603	0.38068	0.409265	0.418823	0.437278															0.660617		0.73009	0.650604		0.69894	0.67507	0.686824	0.679753	0.704964	0.764112	0.8544	0.797692	0.794896	0.81417	0.944242	0.942421	0.976252	0.875718	0.893468	0.864864	0.852993	0.863415	0.899249		0.969164
0.456282	0.413643	0.621519			0.456754	0.44891	0.446756	0.440449	0.443484	0.475519	0.485749	0.481252	0.598661	0.653852	0.908715								0.88747		0.732017	0.725803	0.751048	0.811158				0.887118	0.921756	0.933161	0.922617	0.926066		1.06402		1.08444			0.964575				0.966626
0.374552	0.452152	0.530109		0.614494	0.56938											0.683626			0.588309	0.60421			0.677261	0.743168	0.686987	0.754419	0.736018	0.747404	0.739065	0.764582		0.769634	0.782457	0.778504	0.812126	0.785462	0.856328	0.781675	0.734379	0.707978	0.692977	0.681311	0.676187	0.601967	0.564598	0.522708	0.490014	0.468391	0.483844
0.641185	0.580617	0.64042	0.723369	0.631048		0.682165	0.738025	0.703059			0.859599														0.688846	0.713975	0.60875	0.636964	0.708037	0.661515	0.610791		0.691957	0.691039	0.679668			0.585523	0.57376	0.563343	0.610753	0.595118		0.619209	0.738938	0.774227	0.86737	1.03562	1.10135
0.856745	0.838216	0.812868	0.840471	0.892494		0.809341	0.863512	0.906322			0.822508	0.690076		0.671617	0.629651	0.567144	0.554551	0.521893	0.512586	0.487679	0.512205	0.48212	0.600555		0.605763	0.648344				0.688456			0.755013		0.791393		0.883041	0.963991	0.997223	1.00739	1.01905	1.05664	1.0924	1.08509					1.12787
1.03355	1.01463	1.02154																						0.906362	0.882361	0.900547	0.946052	0.975364	1.02288	1.04509		0.973667	0.98811	0.984704	0.92423	0.960909	0.947267	0.985564	1.00098		0.96673	0.9241	0.886889	0.858214	0.799326	0.768275			0.724749
0.2969	0.342927	0.415732			0.48036	0.348301		0.432968	0.363869	0.472418		0.397404						0.599099		0.59321	0.494738	0.526864	0.499328	0.482345	0.512142	0.511836	0.501474	0.534414	0.482031	0.502465		0.525869	0.510749	0.509942	0.513575		0.548269		0.610403		0.646206	0.672394						0.743022
0.512765	0.38528	0.516937	0.317904	0.447104	0.260702			0.422213	0.375843	0.424159		0.52464						0.618187	0.645095		0.737092		0.799391				0.931454	0.928275	0.819094	0.799008	0.86429	0.850687	0.890386	0.95402			0.996995	0.959912				1.01679	1.03396	1.06057	1.09301	1.10705		1.21584	1.29094
0.792607	0.79404	0.904015		0.926809	0.903975	0.849699		0.768668	0.670265		0.551393	0.626149	0.602789	0.591065	0.514437		0.604975		0.517664	0.517066	0.522558	0.503234	0.520461	0.537035		0.554249	0.606186	0.600671	0.613191	0.61211	0.623925	0.640412	0.653344	0.656502		0.624878	0.67123		0.725756		0.758845	0.835079	0.828507	0.834749	0.905589	0.879602	0.941287	0.985052	0.962425
1.06974	1.02626	0.96363		0.936112	0.86603		0.806513					0.688089			0.58556	0.619164	0.551513	0.471199	0.506777	0.477098	0.466882	0.472952			0.494314	0.514662		0.489991				0.594284		0.547065	0.51404	0.497959		0.472422	0.457653	0.443995	0.437731				0.468623		0.501206	0.490998	0.509926
0.493233	0.497931	0.495029					0.502872		0.514206		0.568786	0.54491		0.544328	0.56463		0.634746	0.558193	0.605567	0.565649	0.575646	0.625827	0.617694	0.572528		0.621752	0.633782	0.655776	0.64537	0.713442	0.684942	0.707371	0.71255	0.748836			0.764269	0.763396	0.739365		0.675215					0.666123	0.695609		0.689541
	0.928041	0.913228	0.887422	0.808802	0.875225	0.852068	0.835177	0.844164	0.8315	0.871153	0.850296	0.81149		0.940606	0.85578	0.918486	0.815397	0.784161	0.781382		0.837358	0.854328	0.850298	0.85629	0.864452	0.919496	1.00391	1.00723	1.05332				1.27407		1.35623	1.35533	1.56176	1.64214	1.59957	1.55877	1.53199	1.61275		1.56173		1.74275		1.77398	1.88155
	0.530438	0.529268	0.544403	0.641478		0.72778	0.828086	0.817097	0.822606	0.82293		0.869972			0.758583	0.834906	0.709663	0.746827	0.74207	0.809944	0.811875	0.846335	0.884426	0.929754	0.916205		1.02593								1.12403	1.04047		0.805433		0.766664	0.702896	0.66448	0.684787	0.67457	0.774756	0.764349	0.780156	0.863972	0.962168
	1.68405	1.77487	1.55553	1.56692																	1.58286	1.6621	1.68318	1.59595	2.27456			2.38565	2.68773	2.03442		2.14569	1.6247		1.948	1.73962	1.45163	1.53301		1.2883	1.17106	1.40008	1.11923	1.4298	1.24752	1.37908	1.26661	1.33998
	0.450269	0.44701	0.439695			0.369705	0.415216	0.434201	0.432846		0.449672	0.458505	0.442032	0.484251	0.451401	0.486228	0.551119	0.591105				0.600761	0.640906					0.846773	0.8318		0.828598	0.85875	0.863732	0.841148		0.803788	0.775966			0.802048	0.741328	0.698667	0.698268	0.698353			0.659458		0.784027
	0.315523	0.325067	0.334565	0.325459	0.323426		0.317605		0.359167	0.361045	0.377574	0.377669						0.353903	0.352898	0.360811	0.419144	0.399656		0.443536			0.461537		0.462379	0.486122		0.49206	0.472044	0.45669	0.450887	0.467971		0.542117		0.495637	0.507862	0.48407	0.506382	0.511543		0.524694			0.499975
	0.318263	0.36826	0.362802	0.37765	0.372009		0.427024	0.481815	0.563173			0.699134		0.943838		0.659487	0.73685	0.622457	0.638369	0.633587	0.659913	0.655264	0.680751	0.638742	0.660242	0.675714	0.683742	0.652892	0.654744	0.697712	0.766775	0.810057	0.794198	0.772491		0.886912	0.989169	0.982884	0.968594	0.92161	0.89569	0.911637	0.96199	0.89877	0.888581		0.887802	0.871271	0.910853
	0.383427	0.357057	0.358803	0.367273	0.359038	0.446916	0.366771			0.394414	0.474896		0.460785	0.438948	0.444273	0.446081	0.5844	0.407218	0.399421	0.386935	0.410136	0.430319	0.429421				0.408065	0.411869		0.389493	0.405823	0.39089			0.393321			0.393855		0.361423			0.330784		0.37534	0.364572		0.339131	0.360133
		0.768677	0.757689	0.744665	0.786648		0.770637	0.842689										0.844233	0.890893	0.875052	0.861274	0.777866	0.809611	0.855319	0.981702	0.781629	0.854608	0.88273	0.955312	0.980062	1.00248	1.04579			1.04886	1.00946	1.01406	1.10813	1.10906	1.00027	1.03282	1.04463	1.06557	1.04763	1.11898	1.1587	1.09503	1.24599	1.28606
		0.405125	0.374795	0.386749	0.398312	0.403732	0.431569	0.422495	0.416618	0.456762	0.451931	0.461886	0.464794	0.50117	0.484808	0.492476	0.531669	0.432801	0.445996	0.440805	0.465277	0.460783	0.42557	0.434519	0.445733	0.407102	0.415982	0.409791	0.417786	0.425953	0.430879	0.453618	0.437977	0.46498	0.483848	0.456188	0.55212	0.562584	0.598796	0.559798	0.609772	0.577206	0.573461	0.573547	0.598349	0.600547	0.624919	0.623564	0.63182
		3.40558	2.26085	4.06037	6.02274	2.51166																							0.860816	0.823338	0.789444		0.740643		0.730415			0.728263		0.739127	0.723329		0.759448		0.733274	0.770526	0.725291	0.782492
		0.32133	0.354038	0.415556	0.438112	0.372562	0.420935													0.469127	0.466101	0.427593		0.53542	0.534997	0.589499	0.577366		0.62177	0.65524	0.618797		0.6701	0.672624	0.656392	0.680998	0.695641	0.677446	0.664521		0.658764				0.720745		0.738722	0.740427	0.742127
		1.09075	1.1799	1.19316	1.1908		1.12933	1.03567						0.953827	0.822842	0.78436	0.726777		0.771331		0.807775	0.834463	0.846916							0.996828	0.990946	1.05593	1.09911	1.10994	1.12439	1.15129	1.11756	1.02801	0.994516	0.995607	0.973395	0.953596	0.930213		0.901891	0.830378	0.868992	0.865482	0.861639
		0.804935	0.865267	0.892148	0.860798	0.979761	0.975447	0.876129		0.861101	0.791664	0.902667		0.619692				0.571389	0.557248	0.591435		0.614	0.669479	0.656178	0.715106	0.71735			0.786721				1.46924	1.6021	1.55311	1.59262	1.58503	1.81213	1.50876	1.38652	1.21499	1.15845	1.04729	1.01714	1.0203	1.06901	1.04762		1.12367
		0.649529	0.587086	0.60271	0.670223	0.608425											0.698938		0.475911	0.47353		0.519615	0.471932	0.481244	0.491511		0.496597	0.484272	0.495581	0.527979	0.517391	0.558809	0.592836	0.600077	0.551306	0.56118	0.598769	0.593741	0.59071	0.552899	0.549546	0.513933	0.489907	0.515655		0.497601		0.497705	0.47116
		0.714967	0.670061	0.669703	0.673589	0.619049	0.671465	0.66649	0.718824	0.641289				0.629441		0.599558	0.668571	0.95253		0.653017	0.577149		0.753684	0.651762	0.681913	0.617008	0.779372		0.756928	0.763294	0.813484	0.844132			0.827116	0.887479	1.0682	1.02236				1.03792	1.06426	1.07547	1.21389	1.30399	1.25391	1.42932
																									1.66892	2.08076	1.92103			2.34003	1.9412	2.17489					2.71104	2.35959	2.42387	2.05488	2.04989	1.91661	1.91721	1.91288	2.57368	1.90073	1.98741	1.38451	1.09405
			0.719839	1.05986	0.754808		0.856864	0.858553	1.04549	0.985701	0.81598		0.975205	1.0329		0.674227	0.607399	0.613735		0.485891	0.533644	0.505598	0.470495	0.426669	0.437789	0.433298	0.406248	0.464161	0.481227	0.536623	0.498759	0.511825	0.484354	0.474485	0.488418	0.540669	0.496401	0.488452	0.57784	0.49388	0.474419	0.472969	0.52466	0.539636	0.530193	0.535445	0.538265	0.602595	0.619314
			0.595174	0.59953	0.721975	0.701697	0.681624	0.669505	0.695622	0.707475	0.679967	0.809055	0.657496	0.630506	0.57751	0.619051	0.638007		0.579964	0.522889	0.572772	0.560108		0.547261			0.56748	0.570525	0.599172	0.634347		0.703445	0.64423	0.626448	0.670639	0.622144	0.643812	0.563002	0.550709		0.535905			0.680357	0.68942	0.750133	0.794484	0.769262	0.781298
			1.4619	1.39264	1.43024	1.04874	1.0402	1.07115	0.937638	0.932197	0.923301	1.00641	1.05417	0.902377	0.998491	1.05252	1.04152	1.10154	0.998729	0.936357	0.824803		0.837858			0.726753		0.672742			0.603267	0.610505		0.513512	0.561503	0.499242	0.439909	0.461725	0.434149	0.410119	0.430706	0.454861	0.460511	0.381433	0.382783	0.507483	0.423995	0.434329	0.424607
			0.538945	0.458075	0.435874	0.406845	0.403957	0.414801	0.47667	0.4987	0.46804	0.462904	0.49964	0.550939	0.629708	0.532379	0.56273	0.558351	0.516769		0.533468	0.521465	0.563545	0.685018	0.669301	0.678941	0.706157		0.702999	0.656049	0.60994	0.581677	0.583794	0.589146	0.605421	0.588566	0.599461	0.602682	0.599732	0.567501	0.547541	0.596844	0.602274	0.644407	0.689405	0.656287	0.681592	0.684623	0.70461
			0.921597	0.95861	0.882601				0.824534	0.735173	0.730308			0.653306	0.648012	0.566859	0.649246	0.569865		0.618819	0.686126	0.763114	0.714704			0.730944		0.669305	0.740898		0.656465	0.598322	0.569602	0.56832		0.515792	0.522348			0.468035		0.412016	0.448491	0.442289	0.429642	0.417788	0.449527
																3.34491		2.67013	3.45999	2.8661			2.28174			3.93376			1.04224	2.65037					2.76654		2.71301	3.23339	4.57223	4.91717	4.44645	5.12566	4.03723	4.67547	5.38725	5.71621	4.91512	4.66974	3.96983
			0.531216	0.534452	0.662845			0.70692	0.581964		0.639484	0.409289	0.419416		0.435444	0.432358	0.482544	0.440058				0.463402	0.492716		0.395241				0.420458	0.396951		0.414006	0.411393	0.400657	0.385211	0.425715	0.398559	0.428841	0.425763	0.391412		0.344671	0.357383	0.332684	0.276113	0.263219	0.271444	0.235978	0.259321
			0.458486	0.461161	0.521964	0.579237	0.539328	0.505893	0.67628	0.579049	0.588731									0.990236	1.08894	1.05644		1.04046	0.990363	0.948171	0.892507		0.982634		0.992702	1.08319	1.04117		1.06298	1.21606	1.34797	1.27622		1.3338	1.2381	1.31751		1.40066	1.45572	1.44934	1.43525
			0.851941	0.906282	0.926518		0.935167	0.906897		0.987728		0.873002			1.09131			1.08729	1.07054		0.973103	0.957537	0.921554	0.907762	0.956919	0.889148	0.908118	0.946594	0.871352	0.872893	0.804287	0.803056	0.797546	0.805062	0.837005	0.849646		0.986143	1.00538	0.952342	0.916937	0.928117			1.01648	1.02091		1.05201	1.05896
			0.530012	0.443331	0.483049	0.5043											0.628682	0.616684			0.588183	0.617638	0.573219	0.617486	0.579634	0.56772	0.594098	0.648925	0.608642	0.636607	0.642238	0.679413	0.679613	0.697426		0.737686	0.723527		0.71805	0.691155	0.684114	0.672506		0.746464	0.750397	0.793053	0.71792
			0.810023	0.801835	0.775067	0.832457	0.824203	0.826328				0.801136							0.823204		0.738446		0.655053		0.607087	0.670121	0.652872		0.897459	0.779326	0.764875	0.79184	0.781061		0.875456	0.631762									1.11098
			0.416809	0.436467	0.425199		0.473945		0.478814		0.716164	0.577222		0.667792	0.614808	0.630288	0.57468	0.620562		0.618369	0.558804	0.576948	0.618979	0.596263	0.661976	0.682041	0.713722	0.704974	0.719117	0.721817	0.737648		0.658527		0.673361	0.6693							0.679828	0.74222	0.75121				0.911179
			0.475328	0.53226	0.507245	0.538453	0.526691												0.546154	0.544719	0.480751	0.49458	0.49014	0.493297	0.484257		0.497667	0.529569	0.477932	0.45024			0.434016	0.43743	0.425765			0.437593				0.455535	0.442273				0.464676	0.441016	0.412807
			0.900649	0.796047	0.730754				1.24942	1.29672	1.38814	1.18727				1.20041				1.91211									1.09705			1.09051	0.971965	0.925465	0.915284	0.935801	0.871874	0.897618	0.913095	0.731783	0.854028			0.746723	0.722947		0.791347	0.832568	0.883386
				0.317751	0.325027	0.302791				0.421405	0.3679		0.491941				0.360234	0.353128		0.48078		0.403786	0.477349			0.546472	0.494067	0.426817	0.488501	0.471994	0.406621	0.42104	0.484919	0.487035		0.51778	0.552467	0.540824		0.539693	0.502244	0.521356	0.503378	0.54632	0.495496	0.532779	0.49634	0.52073
				0.620124	0.656758	0.49851	0.525256	0.57751	0.642025	0.637562	0.600943	0.657927	0.764539	0.765768	0.857873	0.844958		0.749827	0.690753	0.782258	0.708524	0.635332	0.615411	0.603635	0.575289	0.51714	0.553114	0.515359	0.484224		0.535481	0.567538	0.591711	0.589335		0.593299	0.580906		0.549374	0.62275	0.635051	0.605382	0.64379	0.639765		0.596744	0.581082	0.597832	0.566157
				0.612448	0.599911	0.653619	0.57845	0.620942	0.592923		0.603635	0.663365	0.645021	0.807902	0.873543	0.90544	0.934759	0.983841	0.943817	1.1196	1.30115	1.33242	1.4784	1.36938	1.52374	1.60367	1.70546	1.61824	1.61136	1.62855		1.56028	1.57047	1.53185	1.40789	1.31411		1.14713	1.0432				0.963359	0.933118		1.0238			1.34841
				0.416731	0.467854	0.517651	0.527565		0.498924	0.51447					0.542645			0.406021	0.360946	0.40549	0.329345	0.379956	0.372404	0.433185		0.427919	0.43682		0.450028				0.523935			0.617324		0.528376	0.55798	0.680201	0.538259	0.789299		1.06183	0.931803	0.593716	0.636289	0.70574	0.73911
					0.672313	0.689984	0.641022	0.837375			0.692552		0.816488	1.03281	0.801378	0.94739																												1.22173				1.34158	1.35053
						0.375495	0.401829	0.378317	0.415775	0.47373	0.467487			0.639241	0.742119	0.840118	0.811521							0.183667	0.403102				1.13773	1.20975		1.18126		1.03436	1.09321	1.20744	1.19238	1.15202	1.32906	1.38241	1.40263	1.29089	1.21984		1.16523	1.27467		1.30987	1.78325
						0.524661	0.513761	0.509673	0.445164		0.497351	0.437935	0.50618	0.46024		0.475995		0.418388	0.415133	0.45886	0.486764	0.467222	0.442704		0.473463	0.50391				0.517087	0.461332	0.502215	0.469923	0.466122	0.495633	0.51046	0.538465	0.522678		0.501833			0.506133	0.485965
						1.027	1.12408	0.940837						1.12149	1.20052	1.19326	1.0825			0.520675	0.475906	0.598715	0.571852	0.555523	0.583537	0.568789	0.589882	0.548651			0.654154	0.676863	0.758009		0.760193	0.811659	0.854631	0.844906	0.790779				0.747097	0.77332	0.763353	0.776358		0.827042	0.79847
								0.422183	0.401413	0.570551	0.502497		0.488064				0.442281	0.404647	0.393197		0.354692	0.374894	0.439266	0.397338					1.12895	1.18295	1.20202		1.09565	1.57988				0.963121	1.18625	1.09517		1.02474	1.035	0.942949
								0.774409	0.657773	0.653459	0.648408	0.675404	0.635641	0.60609	0.59249	0.597723	0.593329	0.623857		0.57642		0.70666	0.575536	0.609352	0.627114	0.670781	0.707007	0.678253		0.700497	0.727188	0.708817	0.736067	0.753163	0.752095	0.74397		0.716427		0.70038	0.754781	0.772911	0.821755	0.802391	0.844158
								0.506284	0.514255	0.452895	0.489833	0.454394	0.452353	0.511652	0.367086		0.374889	0.336308	0.323436		0.282735	0.255789	0.257363	0.242373	0.254961	0.252474	0.238953		0.240688	0.231143	0.232678	0.23311	0.245934			0.275804	0.280918	0.286389		0.302777	0.311786	0.327223			0.330084	0.349389	0.36699		0.389695
											0.281465	0.302214	0.539082										1.91231															1.51115	1.55689	1.46139	1.06173	1.26087	1.25012	1.19052	1.15389	1.22243	1.24553	1.25245	1.23899
											1.5118	1.42672	1.34932	1.53812	1.41297	1.35343	1.41622	1.34211		1.33793		1.29263		1.28007	1.23259	1.25164	1.13358		0.952683	0.881185			0.800152		0.787317		0.840192		0.855378	0.842111	0.800385	0.771123	0.770531			0.74244
																	0.886043	0.839842	0.944529			0.949137	0.980384		1.02981	1.01663	1.08746	1.0978	1.15962		1.17434	1.2479	1.28772	1.26336	1.17909	1.20385	1.32457	1.30948	1.27171	1.22385	1.29334	1.24963	1.34568	1.31678		1.6143	1.42883		1.48077
																	0.6137	0.56039	0.615328							0.616458	0.603555	0.602778	0.638876	0.689601		0.53976	0.5449	0.564978	0.57126	0.568631	0.598356	0.603615	0.613509	0.661253	0.601621	0.693942	0.682633	0.642102	0.565179	0.557419	0.53107	0.507754	0.504012
																		1.02016	0.874019	0.739547	0.820686	0.789414	0.799102	0.737652	0.782133	0.764583		0.885927	0.919132	0.978716	0.973648		1.03256	0.99016		1.02741			0.916156	0.970942	0.845507	0.853645	0.847529			0.816379		0.923311
																			0.630164	0.582111	0.478865	0.751642	0.521153	0.494701	0.528853	0.471706	0.478161	0.534251	0.543649	0.53903			0.530613	0.49867		0.616795			0.676217		0.649461		0.683067	0.699658	0.730891		0.721777		0.819611
																				1.85715	2.07181	1.86047	1.66401	1.73012	1.67918	1.72738	1.74983	1.46173	1.6558	1.61468	1.59682	1.53998	1.42625	1.5226	1.62537	1.49159	1.37943	1.38896	1.41755	3.03742	1.51887	1.39105	1.23184	1.07628	1.15846	0.91333	0.830106	0.740041	0.699555
																				0.997644	1.13764	1.05292	0.990331			1.14408															0.774297	0.838666				0.865052	0.970994
																				0.337718	0.449851	0.408271	0.347234	0.355789	0.349845	0.373034		0.289419	0.320477	0.375988	0.413418	0.420802	0.40605	0.422881			0.38504	0.379911		0.400475	0.3346	0.323011	0.370669	0.373728	0.395003	0.388541	0.424703	0.427338	0.399755
																				1.23558	1.33647	1.32314	1.32178	1.23589	1.27341	1.34869	1.50203	1.51141	1.40016	1.392	1.38674	1.45299		1.48378	1.50238	1.47335									1.41324	1.40616			1.47867
																					0.833907	0.663005	0.577043	0.655979		0.69204	0.630217	0.653057	0.624201	0.647425	0.561922	0.584556	0.567302	0.484697	0.510305	0.553602	0.511406	0.512082	0.512872	0.491949	0.43585	0.454723	0.373744		0.373858	0.356191	0.404134	0.509858	0.49708
																					0.522458	0.505703	0.521286	0.553127			0.551718	0.554478	0.538334	0.573088	0.557599		0.623402		0.664991			0.663093	0.73494		0.707942					0.640708	0.618353	0.68314
																					0.519013	0.490119	0.483609		0.415431	0.496955		0.443076	0.511531		0.482803			0.48651	0.491989	0.473852		0.477449	0.508133	0.484135	0.486844	0.49922	0.53279	0.510673	0.522496		0.53539	0.521255
																						0.457417	0.449919	0.444555	0.457886	0.435804	0.475919	0.476531	0.472539	0.465488		0.454785	0.485446	0.477775	0.484173	0.471646	0.506842	0.503923	0.497562		0.480207	0.518121	0.494716		0.506345	0.499883	0.508642	0.515691	0.534123
																						0.688126	0.676626	0.61033	0.650903	0.656552	0.718944	0.679269		0.734172	0.783019	0.82104	0.798571	0.804299	0.785341	0.799942	0.830144		0.844031	0.797466		0.808888	0.831302	0.847228	0.861624	0.84612		0.930354	0.951431
																						1.17708	0.811944	0.891133				0.857815								0.918778		0.92944	0.939843	1.05897	1.02734	1.07657	1.1662	1.1962	1.1502	1.12382	1.12875	1.09604	1.11125
																						0.680188	0.60706	0.655732		0.728287	0.695106		0.716336	0.751958	0.824107	0.827107	0.805213	0.852721	0.934443	0.830968	0.813321	0.839976	0.837566	0.898343		0.857607	0.678805	0.698332	0.8836	0.865365		0.950407
																							3.18233			2.94397	3.34042	4.09867	4.27957			3.3739	3.54658		3.05177	2.90183	2.80994	2.56325	3.5898	3.87228	3.46684	3.65332
																							0.579942	0.535188	0.679134	0.656751	0.566972	0.52586	0.633583	0.585297	0.610204	0.607672		0.6676	0.648409	0.651157	0.738217	0.751634	0.700291	0.715256	0.69091		0.8007	0.795736	0.819007				0.830976
																							0.745816	0.728145	0.72536	0.678775	0.719425	0.657561	0.663182	0.662427	0.620488	0.606011	0.605687	0.613119			0.621207	0.618648		0.640798	0.641093	0.670815		0.650083		0.678221	0.68039	0.674582	0.662434
																							0.730681	0.750587	0.877942	0.904407	0.892056	0.959782	0.945178		0.965819	0.97697	0.963342	0.921148	0.910622	0.955248		0.975938	0.970839			0.97894		0.903039	1.07693	1.13966		1.08645	1.1589
																								0.70596	0.687766	0.668519	0.654908	0.649705	0.646639	0.649039	0.67954	0.74225	0.753757	0.696908	0.798396	0.795039	0.797201	0.851256				0.867125	0.867344	0.846934	0.820134		0.868991	0.792599	0.769189
																								2.09155		1.0671		1.4669				1.15819	1.02827	1.18847										3.29236	2.80014	5.19996	5.03491	5.08386	3.54209
																								0.863848	0.849029	0.978054	0.977782	0.955657	0.959027	1.05087	0.982066	0.9883	1.05309		1.03089	0.862874					0.80928			0.784092		0.845908	0.791719
																								0.615038	0.51208	0.591851		0.549004	0.569405	0.571805	0.554951		0.635835			0.670396						0.710444			0.698901	0.660896	0.669902
																									0.879182	0.95943	0.936471	0.956639	1.00643	1.02925		1.30843	1.26268	1.328	1.36402	1.32809	1.35258	1.3439	1.34588	1.25434	1.23368	1.12701	1.10897	1.05813		1.042	1.08126
																									0.497426	0.547189	0.691042	0.582485	0.533283	0.520004		0.560765	0.58895		0.667963				0.710832	0.676426	0.691265		0.942176	0.813705	0.90806	0.885565	1.02687	0.937925
																										0.529149	0.371984	0.385676	0.360866	0.33985	0.350227		0.393954		0.399166	0.35852	0.351062	0.383956	0.36783	0.337839	0.322065	0.283286	0.276663		0.247284	0.251835	0.278918		0.34313
																										0.651369	0.646214	0.61989	0.573954	0.543866	0.55273		0.548762	0.594638	0.546829	0.547551	0.562409	0.593544			0.634192		0.555714		0.537549	0.519159		0.468699	0.493441
																											0.58158	0.570473	0.589193	0.595749	0.566401	0.60971	0.585542		0.625693	0.595464			0.59628	0.651119			0.631182					0.606513	0.621471
																											0.664543	0.610854	0.687046		0.790051						0.661228	0.721835	0.836795	0.612232	0.632707		0.581124	0.581668			0.641868	0.716085	0.707429
																											1.05489	1.10961	1.36992	1.05518	1.39196	1.08263		1.17166	1.16489				1.06038	1.2411	1.17046		1.23889	1.20771			1.18939		1.48943
																											0.982324	0.879139	0.920476		0.98083	1.06323		1.04889	1.16175		1.17876	1.29899	1.25362	1.13616	1.11004		0.977653	1.00111	0.970782		1.00658		0.975947
																												0.487731	0.46438	0.502049			0.529237											1.1228
																													0.506877	0.563704	0.549272	0.555943	0.565568			0.59872	0.633547	0.608352	0.624191	0.613475	0.5583	0.561013			0.572458	0.566391		0.512725
																														0.763758	0.635271	0.700915		0.658851		0.648957	0.645448	0.643299	0.703326	0.701909	0.663118	0.667364	0.691033		0.852137	0.737884	0.689852	0.764214	0.735099
																														0.932795	0.924331	1.06902	0.875595	1.15618	1.09728	1.21426	1.1446	0.901852	0.902127	0.807614	0.959419	0.918894	0.780998	0.792191	0.852233	0.879615	0.891267	0.889014	0.894387
																														2.07031	2.22137	2.10519	2.1209		2.19216	2.45559		2.65576			3.20677	2.45842	2.57261	1.92204	2.16167	2.33847	2.4096
																														0.487306	0.472728	0.452419	0.423961	0.444796	0.485059	0.389549	0.459866	0.516519	0.595732	0.503687	0.562678	0.505808		0.539267	0.546145	0.530173	0.544601	0.536161	0.56153
																														0.877071	0.927695	0.969916	0.953353	1.03887	1.06655	0.972713	1.00354				0.824263			0.751432				0.809295
																														1.74351		1.91414	2.04713	2.13422	2.2637	2.1399	2.25097	2.49739	2.22566	2.251	2.51117	2.66131	2.72167	2.70254	2.62483	2.76636	2.77906		3.03976
																															2.39284	2.52145	3.26508		2.38016	2.72057	2.83371	2.74462	3.07544		2.36468	2.91585	2.74868	2.99068	2.63851	2.58881	2.74147
																															0.89032	0.851254	0.849095	0.873834	0.802822	0.823636	0.734389	0.733489	0.734742	0.701143		0.655167	0.596828	0.569872	0.560945	0.604243	0.635766	0.643422	0.654974
																																1.01375	1.02269	1.04115		0.853424	0.646146	0.55889	0.508477	0.451298	0.475074	0.473222	0.459856	0.425082	0.462356	0.471602	0.484579		0.510911
																																1.41508	1.2998	1.3227	1.27826	0.954326		0.749766	0.85182		0.766595	0.835267	0.8645	0.853066		0.954338	0.952688	0.970288	0.984201
																																	0.499698	0.492607	0.467427	0.498577	0.487286	0.526521	0.503777		0.564529	0.564347	0.530282			0.628964	0.726742		0.774689
																																	1.14067	1.07787	1.15537	1.19137	1.14559	1.24772	1.09497	1.2305	1.04998	1.17923	1.20557	1.06014	1.14519	1.13679	1.21703	1.26215	1.2403
																																	0.812955	0.762583	0.772622	0.656707					0.560704			0.559166		0.720827
																																		0.956657	1.00713	1.09041	1.02276	1.04039	1.01886	1.00943	0.995761	0.900546	0.876693	0.8997	0.859604	0.863698	0.862138	0.893358	0.949952
																																			0.961944	1.06749	1.0713	1.09613	1.08265		1.02286	1.11326	1.25208	1.17702				1.00153	0.986562
																																				1.052	1.06595	1.07311	1.10949		1.15175	1.12725	1.12061	1.26465	1.23317	1.21748	1.25665	1.23725	1.29305
																																				0.863407	0.862526	0.873982	0.861656	0.7931	0.783192	0.735675	0.732813	0.706439	0.679895		0.675866	0.689963	0.732719
																																					1.66627	0.984607	1.70039	0.455569	0.470533	0.383851	0.409268	0.395595	0.397933	0.366227	0.385289	0.358104	0.406775
																																							0.915259	0.870521	0.859275	0.837855	0.800222	0.851753	0.848021	0.814648	0.977899	0.803006	0.793774
																																							0.492099	0.491949	0.4821			0.533551	0.481838	0.508954	0.550785	0.561387	0.509638
																																								0.587891	0.59115	0.587875	0.595594	0.65807		0.600066		0.65467	0.696771
																																										0.625672	0.631711	0.678359	0.628642	0.665015	0.677405	0.755826
																																												0.436815	0.442251	0.445861	0.432157		0.456528
																																													0.513932	0.498099	0.499481	0.492341
																																													1.29846	1.22041	1.28743	1.31774	1.26157
																																														1.59305	1.59434	1.54512
																																															0.64186	0.639622	0.66606
																																																0.618431	0.591969
																																																1.21398	1.10752
1.12537	0.812148	0.725863	0.797571	0.826715	0.793253	0.809789	0.748047	0.803155	0.736788	0.711841	0.792722	1.44291		0.823787	0.880292	0.931094	0.770522	0.735668		0.820896	0.783044	0.886021	0.862393	0.880773	0.898441		0.828672	0.883053	0.84726	0.822341	0.853497	0.788063	0.739064	0.722136	0.669266	0.646217	0.618988	0.656846	0.661768	0.644737	0.654716	0.687393	0.680273	0.663882	0.718761	0.716652	0.708953	0.710616	0.66431
0.446719	0.456159	0.485769	0.479071	0.499087	0.504865		0.495053			0.622233	0.625824				0.670769		0.658472	0.69167	0.728057	0.738642		0.796592	0.80166	0.843565	0.8379	0.851578	0.91572		0.915265		0.984825	1.0243	1.04831	1.07802	1.04733	1.03924	1.11541	1.12031	1.11576	1.08059	1.07577	1.14978	1.19719	1.22457	1.27605	1.33027		1.49841
1.06469	1.02067	0.957057	0.907398	0.88831			0.752984	0.757895	0.77528	0.748424	0.729383	0.732902		0.717073	0.711384	0.703715	0.679086	0.64442	0.644586	0.64765	0.640861	0.627574	0.629698	0.637719	0.57699	0.607259	0.633955	0.664105	0.65916	0.69648	0.651741	0.64436	0.691306	0.643901	0.604926		0.648538	0.678486	0.647062	0.656954	0.650935	0.641423	0.662293	0.64889	0.678886	0.705316	0.717498	0.690052	0.713371
0.367607	0.399052	0.471284	0.376391	0.492892	0.527224	0.435921	0.440687	0.441046	0.399155	0.435876									0.465881		0.497767	0.481252		0.578366		0.547182	0.573055	0.594759		0.519952	0.513502		0.470987	0.442228	0.445278	0.422684			0.441441	0.46504		0.430187	0.467242	0.45948	0.470702	0.467426	0.480974	0.489215	0.506584
0.586211	0.606206	0.682937	0.704737	0.730632	0.78679	0.833868	0.786395	0.852171	0.794606		0.831112	0.829774	0.797388	0.823389	0.817807	0.851093	0.798411	0.814724	0.812098	0.78497	0.768004	0.718349	0.728129	0.755893	0.764573	0.768211	0.811482		0.811984	0.806843	0.814416	0.851946	0.84122		0.841693		0.8951	0.870068	0.868583	0.803351	0.776731	0.772748	0.746361	0.705306	0.724938	0.725648	0.71203	0.735714	0.704404
0.686999	0.708133	0.741301																													0.885604	0.927507	0.887499	0.957817	0.953507		1.03461	0.933699	0.988201	0.923112	0.869749	0.850259	0.871593	0.860745	0.870597	0.962525	0.974486	0.987161	0.946687
0.416446	0.466069	0.482924	0.480423	0.573378	0.505544		0.546062	0.596463	0.563311		0.585464		0.62213	0.694301		0.677931	0.706835	0.753295			0.708098	0.731377	0.806266	0.816141	0.857795	0.882074	0.908334	0.876486	0.870828	0.891091	0.879841	0.867741	0.893755	0.912105		0.854248	0.827047	0.876851	0.931921	0.921742	0.882824	0.932652	0.954576	0.9068	0.896771	0.941668	0.991951	0.955104	1.0032
0.749966	0.706241	0.733782	0.747155	0.768543	0.771888				0.932559	0.942514			0.842465		0.980706	0.993103	0.841184	0.975648	0.926219				1.01792	1.01665				1.09136		1.11563	1.13035	1.1533	1.17533	1.18106	1.17718	1.11582					1.06113	0.996532	1.10499		1.14305	1.14491	1.11695		1.13032
1.06692	0.797227	0.849792	0.839812																					0.994937		1.09205		1.32865	1.43668	1.51581	1.69747	1.93241	1.81677	1.72969	1.72457	1.60249	1.58622	1.66602	1.47024			1.33211		1.51716	1.34979	1.26803	1.40049
0.462049	0.458981	0.466295	0.526915			0.618072		0.782167	0.833996	0.871056		0.877387	0.863894	0.817851		0.722097		0.690638		0.626608	0.618434	0.547831	0.567007	0.578399	0.576193	0.580526	0.587722	0.571982	0.546983	0.572579	0.574223	0.562543		0.585249	0.612243	0.603905	0.588306	0.554364	0.592699	0.574856	0.596936	0.584851	0.57531	0.594275	0.549962	0.567902	0.592766	0.600002	0.601746
0.630605	0.64591	0.613321	0.684531											1.19954	1.15507	1.07129	1.06198	0.869668	0.8317	0.733829	0.698935	0.642953	0.586326	0.590432		0.610999	0.667743	0.699745		0.706196	0.738284	0.716269	0.743434	0.800827	0.891685	0.93194	0.931324			0.770858	0.716288	0.702017		0.688338	0.701522	0.62741	0.665729	0.667404	0.634156
0.409001	0.423586	0.444327		0.436069		0.480767	0.487142		0.559601	0.569899	0.626593		0.613069		0.597997	0.620088				0.727872	0.776326	0.734648		0.687919			0.559788	0.541657	0.525278					0.590755	0.624105		0.6588	0.705794		0.663344	0.697236	0.749342	0.776552		0.813406	0.870529	0.885798	0.878616	0.858461
0.699609	0.485868	0.517061			0.859256	0.86182	0.798118	0.746799		0.816394						0.821348				1.03655		0.997385		1.07787		1.08527	1.00173	1.13038	1.06986			1.03298	1.03154	1.21501	1.20925		1.09391	1.25082	1.22672	1.19698	1.16322	1.1607	1.22126	1.19924	1.14862	1.10748	1.09572	1.11313	1.04835
0.409595	0.407695	0.367772			0.447399			0.482354											0.582422	0.51765	0.741752	0.738074	0.778605			0.940772	0.747202	0.730332	0.774229	0.75933	0.718658	0.50149	0.455826	0.501169	0.458567	0.4246	0.378401	0.386527	0.398534	0.353156	0.362263	0.357156	0.341983		0.349848	0.371655	0.421448	0.385809	0.398039
0.798228	0.875962	1.04196	0.735777		0.818911		0.56842		0.569613		0.500747		0.487872	0.503506	0.495156	0.530577	0.504242	0.503187	0.58962	0.698521			0.650733	0.621761	0.787779	0.850464	0.821655	0.960454	0.814484		0.994078	1.05188	1.07895	1.10095	1.08473	1.10838			1.04124	0.840943	0.765465	0.884622	0.891242	0.916982		0.994644	0.990027	0.888443	1.02687
0.896649	0.951249	0.841322		0.944085	0.937538																			0.669619	0.593394	0.620373	0.626108	0.641256	0.625867		0.659128	0.609561	0.594599	0.542554			0.621016	0.626008		0.697938	0.693207	0.693184	0.750347	0.677849	0.658618	0.66743		0.654288	0.676964
0.53452	0.564277	0.589049		0.581594		0.510158	0.494272	0.554061	0.592182	0.475224	0.429719	0.495488		0.517858	0.454542	0.427071	0.40745	0.416706	0.445382	0.48319	0.47074	0.481764	0.488465	0.52634	0.520572	0.594613	0.569093	0.621198	0.631868		0.639218			0.67362		0.682887	0.737893	0.755784	0.742335		0.647508	0.644637	0.633423	0.658115	0.691478	0.690702	0.727083	0.716615	0.777519
0.553973	0.59412	0.439314	0.404393	0.501485	0.478721	0.639091	0.469283		0.538775	0.540421	0.577523		0.619519	0.621088	0.621396			0.607442	0.584444	0.581001	0.581917	0.600081	0.634215	0.64232		0.752232	0.783244	0.816248				0.910487	0.878148	0.99248		0.881417	1.03318											1.01609
1.04094	1.04076	1.06484	0.980432	0.907828	0.928686	0.978141		0.875431		1.04644	1.11408		0.9693				1.10261	0.881189	0.838941	0.89289	0.94116	0.925913		0.949055	0.943395	0.939801	0.909574	0.851709		0.863191		0.765067		0.755075	0.736977		0.791825	0.710011	0.712314	0.734787		0.625848	0.617667	0.610972	0.614833	0.617967	0.607277	0.608558	0.646826
1.10254	1.18502	1.2656		1.31307		1.15646	1.04202	1.0713	1.08249	1.03739	1.11417		1.02844	1.09896			1.11696		1.16277		1.12596	1.00381		1.21107	1.20509	1.1693	1.17278	1.20442	1.19948	1.19691	1.18134	1.27285	1.23649	1.15563		1.23741	1.22826	1.33693		1.33834	1.24451	1.30388	1.38809	1.33204	1.34604	1.67262	1.58349		1.68388
0.841214	0.841096	0.822505		0.756349	0.657067	0.697748	0.711162	0.693438	0.640242		0.608616	0.721721	0.695403	0.749614	0.612341		0.598029	0.602221	0.559884	0.503924	0.501518	0.5412	0.574308		0.594212	0.643508	0.621735	0.60301	0.601808	0.624248			0.668217		0.668535	0.705817	0.737145		0.679881	0.661135	0.631058	0.609994	0.573852	0.563553	0.557597	0.513175	0.526049		0.546367
0.596094	0.667269	0.59686			0.587677															1.08768	1.05313	1.12638	1.09383	1.02196	1.00694	0.999372								1.031	1.0334		1.05608	0.984805		1.00978		1.04496	1.15943	1.19109	1.20976	1.2362	1.25494	1.28307	1.30286
0.565488	0.64375	0.672802		0.717037	0.454471	0.586138	0.874905	0.53195				0.386724	0.367105																			0.612444		0.570915	0.587606	0.58039	0.586067	0.54919	0.514619	0.508217	0.506165	0.47365	0.460748	0.445243			0.486253		0.499293
0.351554	0.358046	0.342004	0.38209	0.391896	0.430153	0.425719																			0.611583	0.566728	0.55826		0.596951	0.586891	0.616553									0.698157	0.678128	0.700727	0.678267		0.635706
0.717355	0.703263	0.70516				0.565966		0.571937	0.517224	0.560032	0.536935	0.565981	0.512372			0.579614	0.562924	0.517422		0.671881	0.562488		0.60589		0.582443	0.654361		0.764291	0.74835	0.718834	0.653991			0.667777	0.670814	0.782671				0.892122	0.993587	1.03089	0.957209	0.974805	0.906558	0.905938	0.860488	0.858909	0.824784
0.272946	0.259701	0.27529	0.287241	0.292957		0.266209	0.361334										0.451268		0.371009	0.270373	0.247399	0.30197	0.286244	0.272402		0.314048	0.307937	0.304667	0.303832		0.355163	0.390958					0.624684		0.50819			0.353317	0.391133	0.362465	0.322207	0.299397	0.288078	0.295245	0.330157
0.729622	0.714859	0.763002	0.805567	0.895502		0.817191	0.802305	0.775232	0.762125	0.752712	0.709766			0.720666		0.681317	0.619124	0.617194	0.602768	0.672395	0.638504		0.627326			0.707162	0.702492	0.758252	0.633563	0.664969	0.570669	0.530463	0.605459	0.608881	0.598694	0.583594	0.590569	0.489595	0.493278	0.464964	0.528485	0.454202	0.447679	0.431221	0.486298	0.494726	0.481384	0.547285	0.594201
1.1373	1.02238	1.06246			0.990339	0.943214	0.963184	0.907348	0.913616	0.886487	0.955325	0.947181			0.750777	0.790733	0.816084	0.734459	0.72159	0.744329	0.741171	0.735007	0.710354		0.744594	0.810707	0.803995		0.83183		0.817304	0.848951	0.908197				1.06684	1.06607		1.20195	1.13799	1.14813	1.17602	1.12705	1.25396	1.23988		1.23781	1.17905
0.506577	0.445016	0.415541	0.605336	0.537562	0.484928																					0.886452		0.871748	0.660726	0.727282	0.71993	0.646648	0.61481		0.64224	0.661654	0.710895		0.764188	0.754075	0.758625	0.808252	0.819687	0.866652		1.02005	1.09278	1.05893
0.505405	0.505431	0.495407		0.537792	0.571614				0.650983									0.695777	0.696075	0.674542	0.636885	0.633254	0.648504	0.700668	0.738602	0.790633		0.826345	0.795152	0.80304	0.796656	0.767544	0.789575	0.749667	0.753875	0.733711				0.730847	0.715186	0.683744		0.711516	0.709795	0.653194		0.675026
0.736654	0.762336	0.785664	0.770879	0.818108					0.948593	1.02143								0.965752	1.0388	0.830833	0.872463	0.885941	1.01222	1.02422	0.95695	1.00314	1.04996	1.14434		1.21029	1.25097	1.26012	1.34184		1.30083	1.07872	1.08959		1.09952					1.14378	1.01951	1.26626	1.38451
0.722974	0.508667	0.508825	0.497787	0.499558	0.485093		0.470959	0.514392	0.50564		0.597205	0.639558					0.629743	0.559576	0.528886		0.508059		0.579143		0.55666	0.629146	0.573967	0.670108	0.631927	0.739665	0.708892	0.742387	0.763929	0.741763		0.854748	0.809071	0.820334	0.76755	0.789359	0.78525	0.828376		0.785037	0.822486	0.873742		0.839251	0.859059
1.54148	1.48745	1.79849		1.56749		2.12104												2.14529	1.98883	1.7111	1.7543	1.62127	1.65324	1.6277		1.44231	1.35061	1.43091	1.45477	1.54528	1.48264	1.50972			1.27897	1.21282	1.17308		1.05678		1.11439		1.2347		1.39816	1.45203		1.57103
	0.420977	0.532013	0.441707	0.466515	0.447693		0.4739	0.537161								0.638981	0.509824	0.580347			0.632974		0.743317	0.816651	0.894431		0.941265	1.04585	1.01645	0.677403	0.663553	0.61061	0.621898	0.533596	0.50699	0.664256	0.916713	0.893302	0.859831	0.707947	0.699893	0.660781	0.643137	0.630197	0.651287	0.757876	0.833566	0.838639	0.86602
	0.242551	0.166603	0.302459	0.398557	0.218125										0.638557	0.693103	0.671787	0.625041		0.666799	0.660461	0.714087	0.747797	0.744113	0.744189	0.803658	0.82398	0.808434	0.803902	0.836826	0.849381	0.844148		0.842756	0.817596	0.836272	0.933019		0.856959	0.852766	0.853159	0.878971	0.921871	0.906875	0.894106	0.895294	0.885309		0.867597
	0.806714	0.816379	0.883195	1.0386	0.823876		0.844551												0.751992	0.781737	0.776155		0.77453	0.750434	0.837363	0.840822			1.03439	1.10248					1.10361	1.12479		1.16019					1.18383	1.39789	1.20246	1.23339	1.18271	1.29606	1.27278
	0.730929	0.706321	0.687758	0.73915		0.661195	0.613414	0.635201	0.629739	0.755638	0.654989			0.613451	0.633781	0.471696	0.446961		0.496379	0.416217	0.545867	0.583359	0.523653	0.496417	0.453406	0.440312	0.393286	0.344576	0.345095	0.358229	0.422059	0.397703	0.385329	0.450568	0.511988	0.507503	0.517454	0.542557	0.663145	0.741713	0.692294	0.760248	0.822622	0.729592	0.795324	0.92541	0.890411	0.899204	1.02193
	0.57441	0.556592	0.537574	0.572335	0.539494	0.572239	0.563776	0.621029		0.541189		0.811934		0.696928					0.689733	0.693803	0.729987	0.704592	0.758343	0.812021	0.82077	0.885219	0.901599	0.927201	0.950646	0.975221	0.964243	0.964593	0.930255	1.03113	1.09987	1.0765	1.08975	1.04408	1.05875	0.999384		1.02507	0.995406	0.949377	1.0306	1.05455		1.1352	1.1556
	0.432254	0.375188	0.389322	0.370154	0.396666	0.479128	0.481609							0.631412						0.525988	0.72925		0.636897		0.666263	0.718817	0.816947	0.867609	0.819093		0.832773	0.821734	0.759691	0.688668	0.644261	0.625575	0.658686	0.613204	0.564691	0.56498		0.545525	0.529909	0.571855	0.633457	0.628825	0.629465	0.634807	0.655465
	0.593095	0.968323	0.660887																1.12875		1.20169	1.24233	1.08569		0.860851	0.860036	0.839631	0.892089	1.11246		0.987052	0.691381	0.61093	0.649365		0.650301	0.742331
	0.622156	0.691319	0.716	0.762376	0.730976	0.717899			0.789911		0.744062					1.06381	0.778823	0.845507			0.970529			1.11433		1.22704	1.24298						1.24645		1.24032	1.18145	1.2345			1.07703	1.0175						0.995734	1.05191
	1.53415	1.77587	1.67572	1.88443	2.08688		1.88807									1.88379					1.96772	2.84584	2.28234	3.01144		2.88953				1.07951		1.10216					1.0452	1.01489	0.927796			0.825548		0.796399			0.839873
		0.327705	0.337437	0.338816	0.339027	0.373026	0.37991	0.424924	0.438301	0.451286	0.643087	0.549033	0.568565	0.618747	0.679075	0.620476		0.528681	0.531116	0.569762		0.543314	0.532572	0.547737	0.550764	0.537744	0.546485	0.561422	0.571238	0.548053	0.559088	0.553355	0.578343		0.598301	0.560592	0.608892	0.614162	0.601621	0.552728	0.568891	0.567006	0.532483	0.584169				0.655543	0.682385
		0.431247	0.41177	0.42952	0.364161	0.388258	0.507782	0.364822	0.384547	0.390296	0.447453	0.375643	0.365894			0.380704	0.393472	0.399296	0.332667	0.393513	0.435874	0.40756	0.618986	0.550055				3.35366	1.97125	3.47406	4.58357	1.70824	2.73535	2.67791	3.40604		3.35457	3.44283	3.45471	3.65267	2.73713	3.6787		3.94765	3.85554	3.25258	3.52527	3.85636	2.89291
		0.330797	0.364295	0.424398	0.447117	0.471416	0.63457										0.682055	0.786267	0.651891		0.736008	0.75719	0.757586	0.831366	0.789876	0.821556		0.909499	0.895082	0.880782	0.898324		0.83221	0.840593	0.858203	0.858677	0.89942	0.865823	0.961448		0.88239	0.781089	0.815901	0.776104
		0.824838	0.610665	0.590621	0.591812		0.585438			0.740064	0.662966			0.792043	0.934394	0.831931	0.741473	0.733001	0.770325	0.809629	0.765848		0.803796	0.851035		0.853429		0.856712	0.854315	0.908066	0.893926	0.908588	0.913391	0.994614	0.971145	0.96212	0.962975	0.869534	0.861463	0.781008		0.710111	0.695368		0.757183	0.756154	0.785873	0.873466	0.882345
		0.657054	0.5491	0.548265																		0.63295	0.635921	0.661803	0.712071	0.710476	0.774606	0.744441	0.741581	0.806601	0.80186	0.783933	0.796178	0.803361	0.768949	0.761418	0.773533	0.673674	0.656648	0.643434	0.614504	0.603895	0.567523	0.541324	0.545736	0.616606	0.648202	0.694601	0.733181
		0.416295	0.420721	0.410988	0.467056	0.413814		0.41454														0.944052				0.91488	1.02041	1.03003	1.14643	1.17784	1.26358			1.43356	1.30762		1.32035				1.19523	1.17768	1.22894	1.20966	1.27761			1.29331
			0.43454	0.512876	0.515988	0.590283	0.649119	0.734735	0.70543	0.682582						0.550073	0.626129		0.579938	0.678804	0.543627			0.583567	0.540384	0.559779	0.550428	0.533367		0.539238	0.553897	0.59161		0.585774	0.665364	0.527242	0.551374	0.53462	0.672458	0.651175		0.618254	0.499101	0.575821	0.559111	0.625541	0.661182	0.669438	0.676224
			0.868122	0.824785	0.765814	0.751685	0.693086		0.679019	0.65976		0.681931		0.72819	0.790364	0.677102	0.644537	0.632681	0.605156			0.552258	0.535135	0.537093		0.563134		0.510222		0.526342		0.50096				0.519048		0.519158			0.445643	0.437108	0.423499		0.476526	0.464624	0.455768	0.434755
							2.65777												1.04811	1.04038	0.968596		1.09823	1.00079	0.968097		1.08438	1.05554			1.03819	1.1432	0.979145		0.929072	1.04241	1.23237	1.26206		1.23235	1.29511	1.19678		1.08754	1.21878	1.31851		1.45651	1.52238
			1.09683	1.16021	0.813553	0.619872								0.491132		0.631955			0.70142		0.674541			0.77306	0.758584	0.77675			0.922751	0.900613		0.818907	0.798471		0.751583	0.758226	0.784608	0.815096			0.757973		0.788862	0.792799	0.811561				0.783861
			1.13972	1.23978	1.34867		1.40713	1.31742	1.30801	1.14211	1.09393				0.877657		0.812982				0.854449	0.8255		0.832187	0.855396	0.864338		0.97258		1.01689		1.08301		1.02334			0.848144			0.733397					0.810459	0.807735	0.8035	0.813867	0.807727
			0.90487	0.963768	0.844165	0.827486	0.796498		0.801971								0.56163	0.556064	0.510711	0.528574	0.509681		0.430028	0.440916	0.453392	0.454915	0.523489	0.523228		0.519753	0.560947	0.514491	0.558861	0.56955	0.645816	0.659564	0.605402				0.633897	0.614624				0.645723
			0.437249	0.483155	0.548414			0.531624				0.521443							0.665935	0.907116	0.854789		0.92754	0.899389	0.935319	0.903673	0.826391	0.822709	0.817726	0.791415	0.753396	0.843061	0.807893	0.818384	0.8173	0.811542			0.894915		0.840141	0.767047	0.674844		0.625446		0.586676		0.630778
				0.595224	0.599614	0.629483			0.673033	0.701689	0.780286		0.717204	0.64424	0.652617	0.75271	0.783985	0.708647	0.736726	0.812194	0.879238	0.915442	0.8639		0.834256	0.882535											0.607978	0.292442	0.432548									1.01741
				0.908364	0.823151	0.789781	0.80603										0.592938	0.495824	0.413863	0.395087	0.420527	0.36693			0.348818	0.346342	0.338156	0.318127	0.32789	0.322055	0.322254	0.328077	0.317226	0.335068	0.354016		0.380454	0.384109	0.403622	0.400659	0.40429	0.415494		0.428829			0.433207	0.451999	0.466927
				0.268521	0.245466	0.284922	0.291275	0.419783		0.409852	0.44875						0.569027	0.479515	0.496293	0.543884	0.484778		0.565271	0.587658	0.559846	0.522884	0.53774					0.621394					0.731062	0.699686	0.703076	0.69268	0.655277		0.635368		0.678899			0.707011
				0.411516	0.504837	0.473546	0.603033			0.506448	0.572515					0.651505	0.7734	0.613214	0.646072	0.647832			0.700455		0.761711			0.712064			0.656099	0.751229	0.760747		0.837923		0.84231		0.810542	0.787294		0.787573	0.769782	0.799553	0.859203			0.898792	0.931947
					0.61622	0.568721	0.59929	0.568748	0.530863	0.772758		0.593295	0.610994		0.591993	0.567002	0.5501	0.526863	0.504156	0.535743	0.509647	0.52081	0.497753	0.489267	0.525827		0.516115	0.508787	0.479371	0.485263	0.527128	0.490519		0.505524	0.536221	0.499283	0.498764	0.53546	0.5486	0.512855	0.490739	0.487285	0.523687	0.544475	0.579063	0.54774	0.614044	0.58423
					0.902642	0.88863	0.755007	0.83245	0.904968	1.00079	0.97591	1.13256	0.996026		0.984911		1.04006	1.05814			1.21712		1.24053	1.2479	1.40515	1.50031	1.4716	1.55054	1.55355	1.60428	1.5793			1.60902		1.53761	1.38049					1.18747	1.19912			1.17781		1.26466	1.21655
					0.526337	0.57246	0.587281	0.528943	0.608231	0.661407		0.756375		0.881914	0.850665		0.862237	0.800434	0.854451	0.889533	0.900263	0.789967	0.738978	0.813922	0.678871	0.722466	0.788318	0.743086	0.726022	0.897404		0.976719	1.05091		1.0054	1.13396	1.11975	1.07818	0.890442	0.975001	0.923747	0.810702		0.875988				0.927143	0.938928
					0.747663	0.67695	0.672285	0.690492	0.67983			0.719537	0.639784	0.695077				0.959956	0.894979	0.942663	0.951214	0.973583	0.971043	1.04576	0.996192		0.93578	0.938439	0.950517	0.984746	0.989271		0.994592	0.987298	0.98465	0.980372	0.976489	1.00734	0.98292	0.984657	0.976904	0.984752	1.02989	1.0631		1.11219	1.04505	1.0665	1.09826
					0.86976	0.898581	0.852762		0.783855	0.76486			0.72708	0.735387	0.654798	0.629002	0.690249	0.614279		0.560259	0.597872	0.552504	0.567154	0.589129		0.582707		0.580335	0.579407	0.584621	0.581122	0.618136	0.623543								0.789305	0.810862	0.808817		0.828287		0.819439	0.854534
					0.476601	0.461206	0.430768	0.445634	0.427679	0.374656	0.370409		0.351926	0.31213	0.314359		0.346592	0.365893	0.346161	0.372936	0.39128	0.389384		0.389731	0.424781			0.458643		0.410684		0.413281	0.401765	0.384363	0.371619	0.360094	0.417599	0.413158	0.445701	0.432367	0.400525	0.388914	0.385187	0.436096
					0.402154	0.523017	0.351821	0.373179		0.442861	0.382284	0.406005		0.59128	0.387393		0.518981	0.492565	0.259894					0.33354	0.481836	0.506947	0.331275					0.629023	0.534337	0.531067				0.530847	0.499553	0.507604	0.493233	0.516778		0.587663				0.543224	1.18378
						0.576974	0.532768	0.589024	0.605786	0.559756	0.556832	0.581455	0.5765		0.675809	0.626197	0.562888	0.680061	0.595411	0.546497		0.590459	0.575068	0.582446	0.539384		0.509896	0.425734	0.519747		0.496002	0.49154	0.529349	0.493216	0.478232	0.473003	0.470201	0.460477	0.467795	0.463259	0.456211	0.538589		0.504126	0.467424	0.547661	0.59185	0.516591	0.55911
						0.632999	0.562251	0.479453	0.453122			0.4833	0.523126		0.604167	0.546129	0.610797		0.621177	0.698662	0.679108	0.774297	0.696734		0.632412		0.738126		0.766191	0.778542	0.740379	0.691939	0.667923	0.661937	0.608331	0.633876		0.59579	0.622982	0.645206	0.588725	0.613703	0.561589				0.597377	0.635924	0.60275
						0.39896	0.311674	0.404987	0.389153	0.369978											0.538517	0.568306			0.587206	0.566436	0.540247	0.524142		0.503645	0.568133			0.519418	0.476002			0.516477	0.497405				0.58885	0.440745	0.41003		0.4102	0.412339
							0.502721	0.494274	0.52447	0.580752		0.597236	0.640485	0.580798	0.564185	0.629877	0.601948		0.610265		0.643723	0.665772											0.547283			0.534862	0.632276	0.550684	0.614922	0.607162		0.565901	0.578085	0.53628			0.608724		0.561339
								0.300727	0.292588	0.255026			0.287396		0.364841				0.354447	0.357683	0.348076	0.375688	0.355114	0.355345	0.358866	0.39123	0.371656	0.386409	0.413345	0.401587	0.422356		0.447878	0.446195	0.442338	0.469595	0.43104	0.445799	0.466198	0.426419	0.420886	0.431367	0.431027	0.402042	0.39866		0.39461	0.392523	0.409197
									0.877744	0.943757	0.861565	0.786934	1.02221	0.879252	0.879433	0.68868	0.64241	0.699694	0.743269						1.18056	0.96434	1.23333	1.19781												1.45462	1.34821	1.40796	1.36313	1.3959			1.53097	1.60582	1.45268
									0.457043	0.496225	0.413029	0.622316				0.507923		0.547994	0.656321	1.01358	1.2992	0.933649					1.19797			3.02682		0.804067								0.671172		1.06955			1.07411	0.900833	0.916159		0.819629
											0.477791	0.467241	0.508359	0.56855		0.441218		0.403341	0.409112	0.428225	0.426118	0.408786				0.383508	0.382468	0.391932	0.399458		0.380371				0.409356		0.351768								0.360366	0.338123			0.352882
											0.837356	0.846652	0.832792				0.860055		0.839895	0.909368	0.85041	0.795116	0.823715	0.934408	0.889628	0.905441		0.905979	0.886899		1.06256		0.942087	0.892447		0.854654	0.765261		0.775479	0.764275	0.800615			0.894862		0.879658	0.871562	0.943667	0.969046
											0.572421	0.607898	0.880584		0.806849	0.767629	0.931501	0.748774		0.755586	0.788202	0.850989	0.749479		0.756095			0.722694							0.522119	0.516356	0.515421	0.516604		0.457562	0.457544		0.48396	0.50382	0.529164			0.604471
											0.44721	0.552125	0.501732	0.595583	0.593368	0.621981	0.626572	0.673791	0.674157	0.682485				0.728126	0.733616												0.826231	0.82397	0.932248		0.897959	0.92332		0.957764	0.862089	1.08347	0.948416	0.991453	0.968409
											0.599401	0.635703	0.620816	0.690377	0.724951		0.745878	0.771881		0.780571	0.820403	0.843987	0.879841	0.839041	0.854483			0.85427	0.823926	0.768218	0.758331		0.726456				1.29351	1.29832	1.47698				1.33502	1.38345	1.14798	1.12407	1.40211	1.3092	1.24161
														0.374536	0.376627	0.372892	0.379574	0.393656	0.409093	0.389037	0.415504		0.424156			0.46032		0.515983			0.493321							0.679981	0.702377	0.470094	0.327855		0.110059	0.180437
																0.648364	0.662383	0.669111	0.617465	0.609085	0.635999				0.751855	0.777331	0.824742			0.868829	0.88476	0.906449	0.899727					0.970907	0.973887		0.913396			0.987666			1.12311
																	4.70295	4.26763					3.92666	4.52172	4.46801	4.28078	3.91191	3.76972	3.36432	3.69983		3.89583	3.8325	4.05618	3.89594	3.41106	3.83657	3.98524	2.76341	2.50756	2.02575	2.84274	2.18836	2.2146	2.13729	2.26696	2.12388	1.84888	1.9109
																			0.61437	0.645978	0.487742	0.510575	0.446789	0.485485		0.464449	0.440121	0.459608	0.466855	0.406304	0.482418	0.48661	0.501957	0.52004	0.480131	0.525507						0.591943		0.733115	0.694668	0.663376	0.663064	0.655161
																			0.216981	0.214196	0.209685				0.230983	0.24991				0.300162			0.21524		0.268883	0.291409	0.300863		0.312741			0.293389				0.362098	0.342075	0.341694	0.334691
																				1.18385	1.18139	1.26127	1.98269													0.491446								0.835754	1.02528	1.33171	0.903606	0.931865
																					0.281392	0.268203	0.26747	0.269605	0.300259	0.285053	0.315211	0.294628	0.303201	0.311771	0.312454	0.324074	0.338394	0.351415	0.343029	0.338559		0.375033	0.387063	0.365525	0.347673	0.342826	0.348098	0.328437	0.326717	0.309972	0.273022	0.283882
																					0.352542	0.381702	0.379811	0.359778	0.378058	0.384953	0.390314	0.401972	0.432517	0.449621	0.463789	0.472962	0.510072				0.4971			0.458979	0.465829	0.470814		0.553658	0.553075
																							1.60243	1.35239	1.11264	1.37906	1.4263	1.42369		1.57633			1.61729	1.56117	1.34871	1.48208		1.94475			1.68952	1.96538				1.75945	1.42569	1.31275
																								0.646439	0.671797	0.624934				0.635145	0.674637	0.700075			0.712047	0.708068	0.715006	0.713973	0.690322		0.728814			0.742299	0.743794	0.762229	0.76867	0.75028	0.741344
																								0.619009	0.697017	0.622173	0.628812	0.75273		0.590494	0.617817	0.578376	0.610114	0.588081									0.704107	0.720768	0.738098			0.781598	0.792196
																								0.876201	1.00315	0.915748		0.932874	0.975561	0.986458		1.10824	1.14416	1.05581	1.01924		1.08065		1.08625	1.03009	0.944386	0.94114	0.936773		1.01202	1.04215	1.05737
																								0.785927	0.743478	0.829283	0.888424	0.896677	0.893471	0.904016	0.970588	0.950726	0.912923	0.984286	0.985301	1.00422	1.10912	1.14791	1.18526	1.10936	1.22674	1.65843	2.11137				0.58358	0.388212
																								0.912991	1.29195	0.95913	0.868702	1.04594	1.52915	1.13306		1.51948	1.01327	0.990594	1.39042	1.32412		0.898772		0.886015		0.891089	1.1735	0.860605	0.846092		1.31949	1.27501
																									0.717625	0.637516	0.712318			0.630943	0.671624			0.69795	0.772936		0.705836	0.710384	0.754336				0.8686	0.831376
																									3.41784	3.57348	3.12061	3.21579	3.51677		2.89266	2.47749	2.78856	2.18306	2.64703	2.50491	1.86457	1.96354	2.38917	2.67838		2.86347	2.66628		2.69051	2.87034			3.33626
																									0.629833	0.656465	0.628605	0.612838	0.644146	0.651639	0.646418	0.645492	0.663617	0.645755		0.673929
																										1.00334	0.987613	1.07985	0.852874	1.05828		1.0622		1.06444	1.57501	1.11205	1.60113	1.6234					1.55998	1.59682	1.64388	1.54435	1.71344	1.8097	1.85953
																										0.569976	0.527192	0.546023	0.579901	0.642783			0.794789										1.13997			1.19138	1.22685	1.18857	1.26804
																											0.930035	0.995405	0.957634		0.984954		1.03188	0.999745	1.00802	1.04224	1.08267		1.00474		0.852504	0.816698		0.864991		0.918358	0.919555	0.94182	0.977008
																											0.982012	1.02449	1.06652	1.05127	1.08494	1.12696	1.16396	1.14705	1.13631	1.15439	1.18459		1.25793	1.29291		1.20609	1.16714	1.09564	1.05986	1.05555		0.991021	0.875381
																											0.864502	0.72416	0.779655	0.819548	0.816602	0.722086	0.733914	0.711026	0.702787		0.70677	0.725548	0.70899		0.682579	0.669021	0.678762		0.771869	0.801427	0.828089	0.798582
																											0.36865	0.330637	0.353671				0.342293	0.341386		0.308011	0.367723		0.442055	0.451753	0.427266	0.42552	0.452498	0.439585	0.457852	0.4577	0.509956	0.536704	0.544066
																												0.625101	0.645026	0.610345	0.614356	0.536194	0.60177	0.657479					0.724552	0.729332							0.667058		0.568064
																																						1.58498		1.4582	1.69393	1.72781	1.79708		1.79284	1.8397	1.80502	1.85827	1.87885
																													1.27129	1.2149	1.22432			1.32145	1.47982	1.44058
																														2.14226	2.60752	2.13866	2.15645	2.35104		2.95801	3.09569	2.9025	3.07478		2.96685	3.15382	2.97618	3.21973	3.214		3.13751	3.57952	3.30712
																														1.15453	1.1137	1.15511	1.15414	1.606	1.35143		1.69345	1.59685		1.73764	1.67024	1.6002		1.27781	1.69488		1.72831		1.82557
																															1.20456	1.13835	1.10989	1.04601	1.08043	1.08061	1.10877	1.08099	0.943881	0.891086	0.865225	0.990284	0.884966	0.890883		0.833096	0.922092	0.924329
																															1.0745	1.00469	0.999927	0.989226	0.949889			1.00011	0.964145	0.946443	0.892391		0.946779	0.938906		1.19	1.23409	1.20549	1.21822
																																0.504607	0.51499	0.496629	0.496303	0.465088	0.503124	0.544541	0.56896	0.554324	0.603592	0.540063	0.577912	0.568329	0.530279	0.549451			0.57675
																																1.32439	1.27062	1.26694	1.3217	1.46189	1.6913	1.76635	1.01714			0.941485	0.880288	0.818084	1.05859	0.869911	0.878861		0.903719
																																0.903831	0.904417	0.96003	0.870867	0.936683	0.966146	0.932935	0.861549	0.910949	0.903494					1.00833		1.14173	1.03376
																																	1.24171	1.13302	1.06193	1.13384		1.18016	1.21557	1.25435		1.32689	1.33388	1.17456	1.3141	1.4315	1.50038	1.52366	1.5308
																																		0.643929	0.631417	0.652129	0.699555	0.667801			0.638239	0.72731	0.606296	0.642444		0.676983	0.654474	0.61725	0.630824
																																		0.943313	0.990955	0.949778							1.19637	1.16251	1.11205			1.36732	1.43273
																																				0.923497	0.892428	0.863907	0.8953	0.898898	0.935869	0.917156	0.938035	1.01548	1.02035	1.06028	1.12481	1.1466	1.20624
																																				0.697474	0.689364	0.608743	0.645873	0.687761	0.659172	0.667339	0.676858	0.635538	0.587405	0.588243	0.563705	0.608696	0.602206
																																						1.30722	1.00952	1.10424	1.00159	1.16407	0.968491	0.954035			0.899935	1.03432	0.950418
																																						0.752877	0.743272	0.697011	0.690774	0.642655	0.661662	0.651442	0.695851	0.689126	0.762011		0.778531
																																							1.0977	1.07932	1.2229	1.1347	0.95737	0.82943	0.744093	0.812576	0.846903	0.916647	0.837404
																																									2.29213	2.48047	2.5838	2.24488	2.74174	2.64084	2.76237	2.91577	2.72916
																																									0.951784	0.977501	0.996134		1.0888	1.04661	1.09959	1.07357	1.10038
																																										1.91753	1.72071	1.89696		1.65782	1.67234		1.55085
																																												0.638003	0.686003	0.694142	0.725317
																																												0.827607	0.788509	0.727385	0.713867	0.657154	0.637407
																																														1.16669	1.14076	1.25139
																																															1.44429	1.44343	1.56572
																																																1.00991	0.985764
Treated with: 0.0005xEAA
Replicate 1, Treated at time point 17
1.2215	1.24516	1.24257	1.24409	1.1498	1.14737	1.07103	0.967801	0.997391	0.981908	1.08232	1.08594	1.13255	1.1056	1.07316	1.06746	1.05901	0.989222	1.09621	1.02863	1.06814	1.11335	1.08918	1.24255	1.3354	1.25389	1.30475	1.34754	1.28069	1.32627	1.23572	1.15905	1.1394	1.12974	1.07849	1.06323	1.07727	1.04981	1.06062	1.02679	1.0029	0.975066	0.91867	0.87669	0.914539	0.887593	0.920714	0.994932	1.06265	1.05377
0.635716	0.682653	0.621255	0.67251	0.682613	0.666775	0.634543	0.660162	0.657662	0.653854	0.641395	0.625296	0.658097	0.703874	0.753126	0.743229	0.747289	0.75713	0.771451	0.741827	0.735837	0.740816	0.729529	0.728258	0.750929	0.75912	0.801204	0.808182	0.844737	0.892313	0.926199	0.916601	0.969977	0.989025	0.949693	0.890373	0.853877	0.831223	0.810538	0.843776	0.845229	0.823717	0.807597	0.814701	0.825505	0.849896	0.81044	0.831123	0.859484	0.910107
0.781508	0.878603	0.623005	0.867294	0.849286	0.904742	0.918593	0.973808	0.976551	1.01185	1.06957	1.0488	1.10722	1.13027	1.0689	1.04806	1.10406	1.0775	1.11477	1.15817	1.1439	1.14323	1.1822	1.22037	1.1907	1.23085	1.27632	1.2909	1.23198	1.31219	1.31461	1.29644	1.31361	1.29934	1.26958	1.28887	1.29312	1.3011	1.32284	1.37381	1.37806	1.35266	1.39113	1.46587	1.45429	1.4319	1.51376	1.61688	1.64037	1.66657
1.06698	1.11451	1.20695	1.17898	1.18193	1.12737	1.19721	1.18482	1.20057	1.2501	1.28907	1.29853	1.33434	1.32599	1.34608	1.35071	1.36641	1.42043	1.43556	1.42331	1.33353	1.18568	1.21361	1.19675	1.21647	1.24462	1.24581	1.27841	1.28632	1.33001	1.36621	1.30731	1.30495	1.31355	1.32339	1.31085	1.27104	1.26427	1.21722	1.19642	1.18283	1.2149	1.26318	1.29144	1.2918	1.30535	1.36262	1.37244	1.38019	1.36575
0.934267	0.913871	0.919222	1.05867	0.923839	0.899595	0.914908	0.973083	1.17212	1.07277	1.12492	1.11452	1.19022	1.14528	1.15446	1.1901	1.30898	1.17478	1.17352	1.14814	1.16582	1.2585	1.31255	1.30683	1.22696	1.25979	1.29777	1.33346	1.27733	1.23382	1.16136	1.09276	1.27336	1.35778	1.46797	1.61753	1.53653	1.44443	1.29569	1.14085	1.10543	1.11498	1.10976	1.12318	1.13313	1.38884	1.38573	1.42602	1.67326	1.62231
1.29531	1.37912	1.22627	1.0747	1.02828	0.946118	0.889334	0.798182	0.823046	0.849778	0.897756	0.92381	0.94715	0.952211	0.983584	1.00454	1.05507	1.07862	1.1093	1.07507	1.02124	0.98091	0.977934	0.996987	1.01123	1.05901	1.08773	1.11026	1.1549	1.17527	1.16794	1.13575	1.10351	1.07513	1.10747	1.07977	1.09087	1.13465	1.2027	1.21559	1.23289	1.26852	1.26974	1.28782	1.31602	1.31659	1.30011	1.31289	1.36012	1.38879
1.01723	1.01508	0.983066	0.960171	1.03005	1.06524	1.01734	1.02844	1.01493	0.972138	1.00049	0.962168	0.938461	0.892891	0.890588	0.910064	0.892011	0.918416	0.923834	0.911243	0.875413	0.894787	0.909685	0.908122	0.941493	0.928682	0.966421	0.970695	0.963061	0.959634	0.978104	1.00505	0.971164	1.00964	1.01796	0.981661	1.00579	1.04462	1.06317	1.07903	1.11561	1.09911	1.09727	1.05219	1.08826	1.10804	1.09392	1.10355	1.10783	1.09708
1.06079	1.04157	0.97945	1.10048	1.07125	1.12775	1.06987	1.08343	1.26273	1.18991	1.13332	1.19361	1.17498	1.14688	1.05962	1.03363	1.00051	1.16351	1.15658	1.23008	1.2734	1.37403	1.35599	1.37238	1.32378	1.29855	1.28694	1.32202	1.29154	1.31492	1.30336	1.40601	1.29082	1.34416	1.3834	1.36173	1.37845	1.45687	1.4686	1.53949	1.61046	1.55795	1.74051	1.65703	1.72653	1.77747	1.91729	1.76079	1.89923	1.89919
0.90375	0.853052	0.771694	0.794599	0.768308	0.809909	0.743199	0.715231	0.733625	0.752617	0.804627	0.84717	0.924843	1.01035	1.03351	1.14798	1.19236	1.24365	1.30691	1.39364	1.40981	1.43422	1.46644	1.47679	1.50739	1.4844	1.52246	1.54441	1.44792			1.2949	1.21229	1.21511	1.17559	1.19942	1.2211	1.25705	1.27638	1.33716	1.35136	1.35772	1.36135	1.38881	1.42789	1.36799	1.432	1.45213	1.35485	1.35311
0.703729	0.700709	0.684398	0.731498	0.743383	0.724905	0.743867	0.803566	0.822134	0.83547	0.857176	0.904409	0.921995	0.934622	0.955641	0.934171	0.937042	1.01535	1.07053	1.05681	1.14285	1.14203	1.11681	1.11818	1.10906	1.16387	1.16158	1.16307	1.12115	1.18208	1.21448	1.18548	1.18981	1.18362	1.12534	1.1693	1.11762	1.12625	1.15408	1.17041	1.28119	1.32342	1.36471	1.37185	1.37099	1.3642	1.29129	1.25016	1.27896	1.28183
1.05836	0.937018	0.874128	0.832419	0.802738	0.765149	0.798598	0.78437	0.811686	0.818961	0.843351	0.878498	0.939384	1.00305	1.23589	0.935655	0.869184	0.753483	0.704841	0.496696		0.760696	0.890701	1.0533	0.996868	0.953826	1.07718	1.1063	1.00558	1.00087	1.00207	0.913411	0.908864	0.900185	0.861727	0.839449	0.827672	0.81783	0.84042	0.844326	0.830696	0.822563	0.880669	0.843749	0.938629	0.917888	0.952035	0.934161	0.918422	0.935125
0.597499	0.600886	0.586763	0.589944	0.603963	0.595592	0.632837	0.667981	0.647496	0.689689	0.7051	0.746312	0.765783	0.776771	0.815278	0.846143	0.852263	0.874302	0.921569	0.923298	0.919075	0.897355	0.933088	0.941811	0.990343	1.02194	1.08523	1.08628	1.16908	1.20385	1.23893	1.2825	1.25204	1.23656	1.26233	1.22071	1.28267	1.21454	1.15003	1.1563	1.10941	1.162	1.1758	1.17294	1.16553	1.27855	1.21672	1.2073	1.23909	1.21995
0.845239	0.883676	0.868091	0.917749	0.924508	0.896097	0.887299	0.867228	0.878631	0.906172	0.882246	0.896111	0.891074	0.859736	0.864889	0.870614	0.824113	0.837631	0.852474	0.861018	0.888427	0.881436	0.901769	0.920799	0.961833	0.990038	0.997836	1.04243	1.13788	1.18502	1.1902	1.22106	1.20427	1.23186	1.22501	1.19792	1.17728	1.28615	1.33238	1.25514	1.25851	1.27424	1.31279	1.28014	1.33238	1.30447	1.26718	1.20735	1.19246	1.10786
0.643604	0.683865	0.665439	0.663466	0.69496	0.716577	0.72163	0.762747	0.787443	0.799074	0.799783	0.797957	0.81898	0.803136	0.842308	0.847955	0.848453	0.890035	0.975238	0.945406	0.973573	0.954394	0.970006	1.01533	1.0213	1.02687	1.06303	1.07879	1.06006	1.0773	1.08472	1.08365	1.0694	1.09428	1.153	1.14209	1.14257	1.12407	1.11561	1.13844	1.15169	1.19626	1.21707	1.25053	1.26052	1.31347	1.25972	1.30538	1.31054	1.35027
0.70481	0.719239	0.6866	0.697202	0.692752	0.732368	0.71411	0.713339	0.738697	0.76715	0.781154	0.751111	0.771949	0.766339	0.818387	0.815428	0.818536	0.840742	0.859299	0.870912	0.849456	0.848017	0.875269	0.859794	0.89282	0.868231	0.898361	0.906764	0.93131	0.974377	0.952062	0.976268	0.993978	1.00397	1.04786	1.03012	1.08656	1.03778	1.08703	1.08197	1.11946	1.09268	1.10956	1.09838	1.06447	1.05544	1.03535	1.01183	1.03159	1.0355
1.11191	1.09195	1.08446	1.03135	1.07437	1.07538	1.08838	1.07788	1.06583	1.08143	1.11554	1.08601	1.08687	1.1023	1.10995	1.11488	1.08906	1.12855	1.13779	1.10151	1.06289	0.992237	1.01802	0.966016	0.960996	0.958162	0.905364	0.952747	0.978552	0.972641	0.961788	0.95967	1.05413	1.04042	1.03684	1.04671	1.05424	1.28718	1.24153	1.27366	1.28791	1.18627	1.29411	1.26989	1.29015	1.23445	1.24078	1.34385	1.34402	1.29184
0.693412	0.749734	0.727066	0.79044	0.757881	0.767367	0.720382	0.713322	0.738792	0.728817	0.688483	0.728564	0.693498	0.694076	0.686491	0.706803	0.699706	0.724635	0.75611	0.735582	0.676532	0.706183	0.68429	0.652803	0.661453	0.655579	0.639188	0.690123	0.695593	0.721061	0.738997	0.697153	0.685543	0.70611	0.677651	0.672959	0.667921	0.704018	0.72406	0.718483	0.752428	0.792405	0.802471	0.845394	0.885025	0.894477	0.94277	0.979916	1.01639	1.04179
0.811601	0.838879	0.816466	0.770711	0.762549	0.771938	0.773432	0.75406	0.768825	0.751509	0.740994	0.788209	0.815387	0.833671	0.81821	0.82817	0.821265	0.830977	0.836268	0.835965	0.834946	0.828966	0.792295	0.745376	0.796136	0.767611	0.767059	0.795075	0.780705	0.812239	0.825235	0.804005	0.829121	0.85392	0.896244	0.875084	0.894154	0.904009	0.935834	0.877913	0.915556	0.918503	1.03699	1.03115	1.04267	1.05067	1.06607	1.05761	1.10488	1.15101
0.784648	0.785075	0.738336	0.812715	0.81991	0.851888	0.839798	0.862126	0.860622	0.86128	0.856259	0.844019	0.798397	0.847123	0.80559	0.793976	0.760982	0.788964	0.802814	0.78044	0.759735	0.815733	0.829643	0.846454	0.868557	0.900571	0.832913	0.888801	0.813174	0.892056	0.82232	0.868653	0.884564	0.864468	0.86571	0.887731	0.930423	0.941969	0.842237	0.946998	0.995068	1.01798	1.01492	1.05124	1.02619	1.12261	1.07616	1.03743	1.14608	1.11221
0.621645	0.678142	0.698124	0.701631	0.696502	0.68345	0.728324	0.716939	0.729283	0.730898	0.726012	0.736342	0.761389	0.758017	0.767249	0.773464	0.69256	0.747663	0.806908	0.793695	0.795211	0.796147	0.803183	0.770581	0.766956	0.779402	0.807396	0.811324	0.8299	0.836358	0.83603	0.829961	0.823273	0.845518	0.852166	0.918666	0.914334	0.962551	0.953799	0.973401	0.955742	0.952609	0.971543	0.96643	0.935908	0.967906	0.941246	1.01974	1.0493	1.13132
0.942104	0.951077	0.872335	0.930946	0.907208	0.854535	0.823029	0.785166	0.788607	0.760342	0.7288	0.734146	0.689738	0.708216	0.721021	0.737251	0.732463	0.748769	0.733643	0.741764	0.759814	0.79018	0.786632	0.769093	0.783224	0.815491	0.813562	0.832487	0.803979	0.787552	0.762426	0.768273	0.762824	0.742031	0.718105	0.684996	0.690816	0.663504	0.66156	0.666652	0.642554	0.688466	0.690131	0.700597	0.666862	0.645807	0.6877	0.630988	0.650822	0.644027
0.935726	0.898469	0.809743	0.704924	0.677259	0.654007	0.614639	0.658838	0.717307	0.811129	0.842038	0.899491	0.910204	0.904801	0.881442	0.839686	0.855594	0.877763	0.904659	0.936433	0.914715	0.94049	0.975634	0.909116	0.958345	0.954614	0.969379	0.990914	0.99746	0.990784	0.99742	0.983379	0.983927	0.931842	0.823799	0.825249	0.80678	0.774948	0.777836	0.787507	0.81786	0.842589	0.84856	0.837051	0.886489	0.867288	0.882117	0.866504	0.908887	0.891711
0.854123	0.829453	0.83628	0.818366	0.861256	0.871585	0.908578	0.916946	0.984605	1.00313	1.01748	1.04269	1.04695	1.069	1.05905	1.0749	1.08201	1.07286	1.09472	1.04737	1.0525	1.07186	1.0444	1.04375	1.0736	1.04855	1.05922	1.04827	1.08595	1.08263	1.05562	1.05753	1.05927	1.05903	1.0918	1.06389	1.07686	1.12322	1.09456	1.05092	1.05745	1.08878	1.10263	1.09627	1.06048	1.06678	1.08202	1.08832	1.12523	1.08992
0.66096	0.657359	0.614892	0.523734	0.496462	0.548558	0.601279	0.641838	0.729947	0.693643	0.743064	0.835856	0.833068	0.839246	0.81265	0.799415	0.736041	0.723817	0.721401	0.711418	0.695442	0.672329	0.65124	0.678736	0.719775	0.749162	0.781302	0.77974	0.893761	0.937899	1.01364	1.05268	1.03886	1.04793	1.10188	1.09695	1.06549	0.989738	0.960983	0.984209	0.983403	0.999808	0.987828	1.00075	1.05073	1.08806	1.07649	1.10799	1.11008	1.19546
0.618461	0.638969	0.626069	0.620312	0.585664	0.562307	0.613119	0.586812	0.61515	0.624324	0.680196	0.714889	0.744184	0.716854	0.765989	0.813708	0.834086	0.915941	0.982857	1.00685	1.03309	1.05208	1.05146	1.01063	1.02812	1.07947	1.0334	1.04506	1.06899	1.1283	1.15687	1.20619	1.25086	1.32646	1.26123	1.29928	1.27216	1.30362	1.29758	1.31488	1.37837	1.46341	1.37877	1.44645	1.49308	1.48579	1.44184	1.3947	1.38515	1.30289
0.949825	0.964673	0.968159	0.95598	0.981791	0.935981	0.984725	1.00164	1.00263	0.984406	1.03669	1.05909	1.0817	1.11119	1.09818	1.11752	1.13934	1.18125	1.15899	1.19469	1.18965	1.22661	1.29146	1.2906	1.30279	1.31459	1.29375	1.28445	1.27312	1.28546	1.25841	1.26183	1.29302	1.32569	1.34711	1.32974	1.34175	1.37195	1.37952	1.39052	1.38024	1.39174	1.34206	1.395	1.35567	1.2866	1.25232	1.20338	1.19999	1.16624
0.627365	0.625596	0.610797	0.625325	0.627096	0.629447	0.645668	0.658928	0.662181	0.692461	0.690678	0.726877	0.74734	0.774964	0.793348	0.827025	0.840578	0.856012	0.86623	0.877255	0.868104	0.839805	0.832411	0.821748	0.842549	0.840895	0.854045	0.886998	0.892701	0.880881	0.895402	0.914617	0.924337	0.892921	0.909091	0.942403	0.939691	0.986174	0.975892	0.977103	0.998253	0.995285	1.02914	1.06283	1.04604	1.07797	1.07866	1.11845	1.14667	1.15125
1.09629	1.11282	1.09581	1.03177	0.887736	0.949226	0.844837	0.841022	1.00092	1.01826	0.937106	1.07054	1.27046	1.52874	1.61308	1.30087	0.875583	0.862448	0.926739	0.975668	0.962399	0.979602	0.999546	1.06754	1.03624	1.16824	1.23433	1.1806	1.48954	1.54097	1.59792	1.45479	1.56307	1.36976	1.66991	1.68213	1.6225	1.79436	1.88668	1.82783	1.96528	2.09329	2.36943	2.34466	1.89118	2.03875	2.20444	2.18771	2.16842	2.3279
0.653932	0.619112	0.627045	0.620425	0.589451	0.569493	0.551129	0.591206	0.568802	0.569975	0.601978	0.639498	0.647168	0.675264	0.698338	0.739711	0.746857	0.752411	0.803588	0.801066	0.786208	0.794208	0.81405	0.86175	0.872348	0.849526	0.814036	0.817792	0.766577	0.793949	0.795537	0.828363	0.847702	0.868155	0.87165	0.898878	0.891314	0.923527	0.895929	0.884839	0.919337	0.895467	0.92666	0.952373	0.943148	1.01168	1.03413	1.03028	1.09903	1.13497
0.636197	0.625924	0.653573	0.672105	0.672983	0.676296	0.699182	0.713955	0.720649	0.778879	0.805414	0.820772	0.806665	0.812581	0.790199	0.793591	0.811303	0.874341	0.986303	0.989064	0.917092	0.876205	0.850677	0.835073	0.858523	0.86453	0.860796	0.835119	0.871897	0.868469	0.880271	0.915674	0.920416	0.918674	0.948493	0.940539	0.950622	0.956199	0.985466	0.946873	0.967281	0.911865	0.955794	0.936897	0.956098	0.939497	0.936366	0.950145	0.987286	0.989619
1.06319	1.06906	1.13332	1.05991	1.07844	1.06389	1.04386	1.06563	1.08469	1.02523	1.03294	0.91227	0.989732	0.994184	0.982198	0.976311	0.980964	1.02664	1.09562	1.10465	1.09235	1.02762	1.01988	1.02934	0.993053	1.00053	0.980695	1.01424	1.0289	1.02322	1.02985	0.987018	0.989361	0.926146	0.950415	0.926182	0.921627	0.934321	0.966997	0.984665	0.95616	1.05153	1.08471	1.22255	1.21579	1.3503	1.29166	1.45072	1.45203	1.45955
0.839432	0.853202	0.858975	0.834606	0.805406	0.828627	0.834481	0.872939	0.880737	0.900173	0.952499	0.954357	0.959919	0.995933	0.979991	0.996513	1.0194	1.06879	1.14885	1.23337	1.24628	1.24927	1.34008	1.34808	1.40867	1.41605	1.45057	1.41006	1.43095	1.35586	1.31098	1.25235	1.16734	1.12167	1.12512	1.14675	1.17894	1.17742	1.26095	1.25995	1.26169	1.23346	1.20196	1.15726	1.14705	1.15815	1.15557	1.16105	1.13212	1.11985
0.823068	0.899074	0.900019	0.89429	0.96632	1.01892	1.03927	0.998948	1.05611	1.04301	1.07996	1.08285	1.10593	1.1016	1.09931	1.12607	1.12993	1.14741	1.17772	1.19514	1.17025	1.15804	1.12432	1.07846	1.06594	1.09655	1.11127	1.12816	1.13501	1.13343	1.11954	1.14453	1.17295	1.1642	1.14526	1.13636	1.13498	1.12706	1.13203	1.13924	1.12896	1.12009	1.10648	1.08871	1.1084	1.09319	1.12406	1.15766	1.18276	1.21687
0.6841	0.77162	0.788691	0.77953	0.772461	0.757294	0.742745	0.744963	0.72869	0.745685	0.744245	0.737354	0.751993	0.795529	0.794063	0.796559	0.81826	0.847773	0.887854	0.898907	0.860877	0.832603	0.840172	0.861869	0.860342	0.89636	0.923878	0.920698	0.949875	0.953411	0.968067	0.988383	1.00587	1.01579	1.0404	1.05391	1.08663	1.10844	1.09787	1.17008	1.16879	1.14767	1.18697	1.17219	1.18451	1.20387	1.16513	1.16895	1.13895	1.14875
1.22187	1.16505	1.16187	1.17988	1.22681	1.24609	1.23582	1.22698	1.23398	1.21381	1.23533	1.25332	1.25584	1.19605	1.20809	1.18244	1.2294	1.22652	1.2534	1.25686	1.25205	1.25314	1.3197	1.34312	1.3764	1.40288	1.43645	1.4185	1.43195	1.44332	1.41302	1.44301	1.42807	1.3314	1.32366	1.30929	1.2887	1.28442	1.25203	1.20598	1.19197	1.17602	1.14313	1.13342	1.12819	1.11581	1.09062	1.13196	1.08921	1.13879
0.878709	0.906755	0.881233	0.843854	0.835856	0.861042	0.824049	0.85709	0.884323	0.924991	0.940102	0.978189	1.01826	1.03053	1.03422	1.038	1.0106	0.970101	0.999538	1.02691	1.04714	1.08509	1.12374	1.1537	1.19634	1.16416	1.21487	1.21485	1.17966	1.15011	1.12947	1.10834	1.12007	1.17705	1.19799	1.29183	1.32099	1.33936	1.3257	1.33005	1.30063	1.28404	1.30701	1.32387	1.31385	1.3329	1.24585	1.2126	1.16719	1.17656
0.601094	0.639595	0.666635	0.608164	0.621091	0.585794	0.556046	0.587797	0.557543	0.591897	0.587454	0.560146	0.577809	0.54818	0.583319	0.594953	0.603264	0.640367	0.702413	0.69518	0.699698	0.691273	0.695425	0.677805	0.725523	0.732182	0.723593	0.752971	0.799476	0.796183	0.84701	0.815059	0.86948	0.847917	0.84122	0.87299	0.905926	0.935076	0.985198	1.01256	1.0197	1.01559	1.03501	1.02022	1.04622	1.06189	1.05045	1.02708	0.993165	0.995534
1.10869	1.0949	1.07674	1.03292	1.07856	0.853627	0.952108	0.876671	0.959716	0.912674	1.107	0.935984	0.903694	0.913247	1.01167	0.826498	0.963907	1.01475	1.02422	0.952619	0.996567	1.06875	0.991293	0.942562	0.963385	0.930972	0.866155	0.969537	1.06189	1.13071	1.13518	1.15474	1.12761	1.13226	1.09573	1.15686	1.21162	1.17496	1.1385	1.11091	1.08275	1.0905	1.06501	1.12598	1.09786	1.03229	1.0909	1.07172	1.06739	1.12636
0.895328	0.855134	0.79276	0.758073	0.711532	0.615716	0.628922	0.619362	0.599659	0.658673	0.619112	0.608139	0.610992	0.687843	0.648271	0.679867	0.642949	0.641069	0.665343	0.671494	0.689448	0.659114	0.675166	0.666922	0.688939	0.719497	0.679062	0.740849	0.69245	0.730017	0.693783	0.67116	0.706072	0.728572	0.713828	0.723349	0.70935	0.708557	0.728944	0.753621	0.790845	0.761263	0.775705	0.804404	0.762345	0.784004	0.829191	0.831029	0.827791	0.859513
0.606167	0.636416	0.63895	0.595986	0.6191	0.612218	0.600882	0.609432	0.611353	0.614019	0.606791	0.592051	0.581262	0.602277	0.609541	0.585226	0.598893	0.6006	0.625042	0.637921	0.639304	0.611342	0.644865	0.660701	0.659015	0.694041	0.694902	0.697428	0.716283	0.712391	0.682035	0.696161	0.695706	0.706452	0.695047	0.681269	0.683435	0.688089	0.660344	0.687653	0.704354	0.707699	0.709529	0.727949	0.718714	0.763091	0.739814	0.76821	0.783787	0.767999
1.11647	1.07789	1.08384	1.03167	1.00983	0.97148	0.960825	0.984589	1.01233	1.03914	1.02544	0.998269	0.930328	0.872747	0.835057	0.898877	0.929826	1.01959	1.09121	1.05614	1.15019	1.20869	1.23121	1.26634	1.30303	1.2473	1.30872	1.29283	1.33525	1.28516	1.26913	1.33327	1.30139	1.33342	1.38552	1.35152	1.36085	1.32565	1.28655	1.27371	1.18997	1.17409	1.17298	1.07859	1.06055	1.04704	1.00429	1.00344	1.01285	1.03975
0.987289	1.05478	1.07249	1.04251	1.05678	1.03198	1.0919	1.11544	1.09605	1.09514	1.1312	1.17933	1.1914	1.21557	1.27246	1.26866	1.30681	1.38035	1.41933	1.55493	1.61129	1.5889	1.64696	1.63641	1.70797	1.76742	1.71392	1.70816	1.66446	1.67634	1.58569	1.56065	1.455	1.36975	1.32083	1.33915	1.32125	1.398	1.35858	1.3263	1.36353	1.2891	1.22988	1.23311	1.17364	1.12541	1.09604	1.12754	1.13425	1.14027
0.734239	0.735897	0.771101	0.809679	0.78729	0.797001	0.817293		0.819339	0.893611	0.918646	0.885404	0.840994	0.819899	0.787824	0.804115	0.818177	0.811023	0.801467	0.852396	0.842624	0.883669	0.834948	0.870921	0.883368	0.876846	0.916013	0.867306	0.875594	0.82471	0.843275	0.88659	0.860049	0.840563	0.878563	0.863673	0.89705	0.872349	0.961229	0.996412	0.925728	0.964311	0.999004	1.02365	0.976673	1.05102	1.02201	1.03707	1.09888	1.09908
1.23986	1.35744	0.985608		1.18399	1.09007	1.18524	1.11021	1.15163	1.23955	1.23379	1.22273	1.17761	1.20907	1.20243	1.28914	1.21446	1.31311	1.29315	1.3084	1.2904	1.21404	1.23253	1.1411	1.07909	1.15854	1.1064	1.12534	1.0977	1.07407	1.05943	1.13581	1.14863	1.13252	1.19003	1.18265	1.2025	1.22138	1.20679	1.19871	1.24997	1.243	1.29076	1.24119	1.26946	1.28981	1.18436	1.16206	1.25375	1.19188
0.886324	0.799759	0.835362	0.773749	0.838894	0.814255	0.872041	0.883937	0.825461	0.841865	0.915242	0.803177	0.791141	0.815975	0.813288	0.802129	0.865051	0.818451	0.829376	0.804713	0.798266	0.811232	0.759197	0.88015	0.850772	0.800339	0.780547	0.777681	0.794825	0.758514	0.778575	0.818631	0.740507	0.730284	0.739814	0.773679	0.769752	0.733802	0.794889	0.795288	0.732696	0.782293	0.740167	0.783942	0.773773	0.765709	0.803542	0.764539	0.775599	0.802103
1.25674	1.14954	1.13752									2.82474	2.04105	1.43769		1.42017	1.28622	1.30419	1.29774	1.52472	1.28011	1.26749	1.26637	1.22557	1.25941	1.3349	1.50846	1.34533	1.37279	1.38568	1.24273	1.31171	1.29975	1.41891	1.31084	1.50493	1.37613	1.30086	1.37202	1.29387	1.65167	1.39347	1.38566	1.5687	1.371	1.6905	2.08952	1.40523	1.43196	1.30412
0.639227	0.655135	0.66465	0.659601						1.6775		2.49797		2.8224	2.63458	1.94263		2.89682	3.59658	2.90628	1.78758	3.15496	2.64735	2.09303	1.87468	2.23069	2.37895	2.64669	2.31134	2.92726	3.09944	4.1588	2.61489	2.40973	1.95038			1.33446	1.28413	1.43507	1.31882	1.39248	1.50054	1.4901	1.56255	1.24827	1.96598	2.52122	1.68112	1.77913
1.15949	1.05646	1.15511	1.20798	1.17212	1.26739	1.14412	1.41176	1.45123	1.50846	1.52607	1.35363	1.18454	1.14905	1.11009	1.10615	0.833418	1.16928	0.976901	1.02109	0.960161	0.823729	0.793373	0.761784	0.972275	0.728294	0.849769	0.742473	0.787186		0.886193	0.720414	0.725082	0.500767	1.0112			0.786161	0.610185	0.834486	0.703407	0.731624	0.792565	0.768694	0.774879	0.727882		0.64336	0.748929	0.722087
0.967392	1.03018	1.11349	1.22928	1.14147	1.20643	1.25933	1.19376	1.47626	1.5688	1.51499	1.55745	1.52581	1.38767	1.44524	1.58389	1.34361	1.3307	1.54196	1.34152	1.30089	1.40944	1.46923	1.60125	1.48453	1.54584	1.61415	1.87035	1.60557	1.76979	1.58031	1.56973	1.55057	1.50073	1.53514	1.58038	1.60318	1.64748	1.60247	1.62518	1.74545	1.84361	1.93443	1.84502	1.90853	1.96383	1.91775	1.96059	1.93846	2.05114
0.981373	0.790965	0.766497	0.878167	0.821015	0.833859	0.855409	0.848566	0.762707	0.904044	0.817712	0.896732	0.862888	0.886071	0.859107	0.859937	0.839101	0.798341	0.876522	0.819946	0.763519	0.82346	0.779233	0.753775	0.758081	0.777506	0.863395	0.853692	0.749806	0.612518	0.776739		0.648916	0.651099	0.639483	0.676098	0.604917	0.642323	0.572365	0.585153	0.581233	0.551243	0.514183	0.556883	0.536493	0.531571	0.518465	0.519001	0.568612	0.544908
0.544632	0.435187	0.446666	0.413236	0.433612	0.38472	0.450208	0.456477	0.448528	0.472803	0.517581	0.587303	0.583968	0.593994	0.553543	0.591745	0.591625	0.56707	0.597125	0.683628	0.626703	0.595302	0.489081	1.04852	0.566852	1.017	0.844483	1.1162		1.06562		0.914438		0.766743					0.83491	1.20657		0.760737		0.880068	0.88895	1.07378		0.954533	1.20361	1.38401
	0.790487	0.823326	0.883069	0.93272	0.910663	0.93291	0.900337	0.906885	0.850079	0.880795	0.903736	0.939135	0.99228	1.02883	1.06633	1.1309	1.29877	1.39075	1.38138	1.40108	1.37544	1.33556	1.36538	1.33916	1.32601	1.28419	1.30756	1.33751	1.41868	1.40576	1.47651	1.40007	1.36778	1.36765	1.41483	1.38695	1.43202	1.35157	1.38108	1.42851	1.54744	1.60569	1.58909	1.63224	1.59919	1.54344	1.52192	1.47392	1.41968
	0.762578	1.18625	1.04512	1.04963	1.02015	0.890885	0.899881	0.928994	0.819627	0.809617	0.767217	0.75429	0.707335	0.686513	0.648893	0.668947	0.653641	0.677382	0.688575	0.752617	0.761735	0.769518	0.790038	0.838483	0.952497	0.92847	0.952343	0.905657	0.892443	0.952298	0.950577	0.988683	0.936379	0.908377	0.907691	0.879981	0.886492	0.888655	0.868379	0.88414	0.906024	0.927497	0.948105	0.947353	0.927788	0.894566	0.951544	0.955529	0.940297
	1.28393	1.21563	1.21858	1.20981	1.21503	1.29545	1.24824	1.20723	1.2051	1.208	1.21086	1.27521	1.25595	1.28764	1.34203	1.33548	1.35127	1.4361	1.36944	1.35136	1.34722	1.29512	1.26179	1.26412	1.32064	1.26259	1.23408	1.34704	1.32687	1.32493	1.29919	1.32053	1.35248	1.35702	1.37114	1.39725	1.45009	1.44018	1.47838	1.47202	1.50265	1.47377	1.47594	1.56975	1.61262	1.69362	1.68184	1.73993	1.88955
	1.28425	1.26646	1.25116	1.27431	1.4607	1.37102	1.21364	1.44465	1.39019	1.30133	1.61596	1.59299	1.33459	1.39453	1.3961	1.38003	1.28993	1.44499	1.16404	1.4685	1.25952	1.25333	1.26218	1.2831	1.44095	1.49367	1.42367	1.47912	1.49893	1.23352	1.28312	1.38785	1.25811	1.31051	1.32654	1.36904	1.26295	1.29851	1.30344	1.46529	1.36872	1.32493	1.24595	1.31423	1.32506	1.40063	1.28835	1.24301	1.27471
	0.892528	0.826813	0.926168	0.90595	0.887991	0.886718	0.858595	0.840496	0.849446	0.836748	0.794888	0.894632	0.937232	0.957503	1.00575	1.01593	1.06191	1.1563	1.14711	1.12794	1.13854	1.12709	1.12611	1.14627	1.15915	1.18635	1.09213	1.11622	1.11736	1.11556	1.11828	1.05514	1.06473	1.07148	1.05762	1.04751	1.03093	1.03355	1.06044	1.04345	1.02167	1.03339	1.0106	0.984132	1.00597	1.00029	0.984217	0.988484	0.951427
	1.75388	1.90746	1.73592	1.7982	1.63387	1.78458	1.72112	1.61142	1.71453	1.64912	1.63638	1.69456	1.6714	1.6474	1.65133	1.63185	1.60967	1.53321	1.5942	1.5403	1.49328	1.45477	1.48848	1.45668	1.55415	1.50192	1.46967	1.46464	1.45093	1.38612	1.37064	1.33568	1.38082	1.4148	1.39195	1.41747	1.43938	1.44015	1.49615	1.43744	1.47014	1.45254	1.48034	1.37582	1.41005	1.35316	1.29745	1.25978	1.26944
	1.27927	1.31786	1.4355	1.29109	1.37795	1.37618	1.35317	1.40913	1.45774	1.40192	1.38791	1.45226	1.44273	1.49147	1.56493	1.43648	1.51099	1.49499	1.42536	1.46831	1.52839	1.50009	1.54823	1.58089	1.62174	1.67771	1.60562	1.64766	1.61334	1.63802	1.63724	1.65709	1.69547	1.7861	1.69135	1.63138	1.6317	1.55686	1.55499	1.58395	1.54732	1.5901	1.50451	1.55297	1.54509	1.80414	1.59111	1.57739	1.71539
	0.994925	1.04258	0.981468	1.11634	1.12879	1.14039	1.05246	1.19364	1.13084	1.2043	1.29157	1.22154	1.26233	1.29756	1.27121	1.28798	1.2855	1.3518	1.38376	1.41511	1.46239	1.50042	1.50582	1.50896	1.5119	1.52721	1.53465	1.54347	1.53337	1.52905	1.5553	1.59908	1.60585	1.68862	1.69486	1.71838	1.65824	1.67314	1.70864	1.68871	1.64913	1.68936	1.58786	1.67519	1.59532	1.6984	1.67526	1.71533	1.71082
	0.542604	0.54466	0.574737	0.589463	0.629621	0.614547	0.61906	0.6358	0.626281	0.593899	0.611277	0.615577	0.591388	0.597502	0.592115	0.609531	0.633233	0.680857	0.701781	0.689697	0.744607	0.787624	0.792668	0.827192	0.876429	0.888652	0.973299	0.97505	1.00733	0.951679	0.98824	0.986826	1.0468	1.03904	1.06547	1.03472	1.0283	1.03292	1.03206	0.991008	1.00453	0.945254	0.973412	0.990939	1.01018	1.00126	1.07064	1.0345	1.11224
	0.751506	0.766979		0.709887	0.744513	0.695686	0.696175	0.669169	0.621518	0.64144	0.593475	0.587581	0.575802	0.539086	0.522768	0.518	0.538961	0.58974	0.60167	0.595034	0.59572		0.617944	0.611111	0.627771	0.642905	0.662489	0.699921	0.75197	0.977322	0.703131	0.795126	0.677778	0.571317	0.43924	0.436629		0.650227						0.575044	0.58536	0.625617	0.65375	0.66429	0.719835
	1.03882	1.03288	1.03258	1.03205	1.058	1.0713	1.05724	1.0894	1.06287	1.02454	0.999502	0.999352	1.01869	1.01148	1.10799	0.973959	1.06598	1.08985	1.08248	1.11378	1.10895	1.14055	1.07288	1.00843	1.02721	1.07013	1.03401	1.08139	1.12967	1.12188	1.21186	1.22084	1.18925	1.17893	1.2023	1.19051	1.21318	1.27912	1.3368	1.31513	1.44338	1.51752	1.46135	1.49733	1.50797	1.41261	1.34866	1.31132	1.26622
		0.809799	0.883763	0.942166	0.905712	0.947477	0.873236	0.89607	0.808454	0.805542	0.814974	0.762145	0.87431	0.87367	0.912715	0.910788	0.991319	1.0776	1.15105	1.07996	1.05438	1.04516	0.959416	0.989588	0.968848	1.02347	1.05674	1.05527	1.09258	1.12469	1.12754	1.2368	1.13443	1.2348	1.29092	1.22833	1.27083	1.33416	1.26983	1.29225	1.33925	1.31438	1.24754	1.2087	1.34561	1.28864	1.32632	1.2924	1.35299
		0.990712	1.00257	1.02356	1.04668	1.05709	1.08959	1.15176	1.12027	1.16788	1.20686	1.22718	1.22291	1.13078	1.10365	1.06384	1.10661	1.09098	1.09337	1.07802	1.08394	1.08109	1.09624	1.07804	1.05639	1.06565	1.09549	1.038	1.04792	1.0228	0.990108	0.994594	0.986913	1.00544	1.00256	1.01452	1.01635	1.02188	1.0167	1.02484	1.02836	0.996172	1.02998	0.991809	1.02442	1.03404	1.0175	0.987049	0.976884
		0.559584	0.579086	0.604139	0.625966	0.634224	0.650194	0.645616	0.64044	0.65322	0.643093	0.645321	0.690717	0.697489	0.719664	0.757086	0.816553	0.90804	0.952823	0.92334	1.00001	0.994515	1.01052	1.08503	1.15704	1.23766	1.23825	1.32241	1.34587	1.36328	1.37754	1.22077	1.13579	1.06036	1.01952	0.986339	0.940378	0.984493	0.948111	0.951735	0.979385	0.959916	0.975024	0.993743	1.04827	0.99659	1.06277	1.08764	1.11166
		0.910998	0.923563	0.986019	0.924969	0.882384	0.854843	0.831708	0.830387	0.799765	0.770187	0.773308	0.755736	0.750465	0.739961	0.776252	0.87279	0.96455	0.949099	0.905656	0.909093	0.897292	0.904188	0.97016	0.961233	0.964143	0.961548	0.97975	1.01411	1.09337	1.11336	1.12267	1.14478	1.09507	1.08672	1.11337	1.12509	1.16281	1.18977	1.14838	1.19098	1.22458	1.2373	1.21578	1.27003	1.28487	1.28157	1.30149	1.30012
		0.53198	0.514621	0.538976	0.527304	0.522573	0.521429	0.544389	0.531622	0.515911	0.559774	0.565268	0.571146	0.586749	0.571427	0.595532	0.633163	0.653129	0.636741	0.653357	0.634036	0.66203	0.679267	0.676321	0.705861	0.733714	0.716193	0.705963	0.720088	0.728836	0.734364	0.74126	0.727076	0.748929	0.773006	0.77948	0.797186	0.803636	0.785339	0.813108	0.845261	0.850319	0.868881	0.884527	0.891667	0.914676	0.934586	0.972113	1.0341
		0.880008	0.892447	0.835075	0.815439	0.794677	0.718359	0.766172	0.798792	0.811245	0.794135	0.80938	0.798343	0.802012	0.806271	0.822568	0.847374	0.944309	0.929261	0.847454	0.883085	0.910101	0.823582	0.862125	0.949419	0.969212	0.995908	0.984035	1.02215	1.0274	1.01878	1.02124	1.00684	1.04011	1.0405	1.03618	1.01409	1.06392	1.06357	1.09739	1.09437	1.10153	1.05157	1.07263	1.0717	1.06174	1.08459	1.04817	1.07049
		0.776407	0.754438	0.824957	0.766372	0.785671	0.87011	0.881096	0.863002	0.848184	0.878909	0.88933	0.864284	0.857948	0.87604	0.871737	0.897368	0.912006	0.874915	0.844619	0.827848	0.811425	0.829433	0.819932	0.798293	0.823322	0.876444	0.839841	0.878598	0.87214	0.884623	0.851063	0.804766	0.796446	0.762475	0.794969	0.780092	0.757941	0.769823	0.783727	0.767644	0.773107	0.786517	0.726491	0.763853	0.73714	0.76127	0.785095	0.767117
		0.701033	0.702256	0.761481	0.771045	0.720528	0.806552	0.839749	0.890358	0.929412	0.96637	1.02031	1.05564	1.05428	1.04851	1.04232	1.04342	1.05443	1.0339	1.02738	1.01236	1.00155	0.961581	0.954185	0.994319	1.00558	1.03996	1.03116	1.0101	1.05021	1.05905	1.04451	1.02478	1.01443	1.01629	1.01061	0.983476	0.996346	1.029	1.04668	1.00221	1.11789	1.14405	1.15079	1.13889	1.17854	1.26427	1.22766	1.26142
		1.30577	0.993097	0.863122	0.905642	0.866836	0.845439	0.844419	0.843338	0.799672	0.841072	0.828741	0.829007	0.862485	0.824528	0.886495	0.939981	0.917193	0.950028	0.946267	0.894724	0.871078	0.905292	0.919586	0.870802	0.89579	0.944532	0.918579	0.923454	0.982308	0.988286	1.03696	1.03438	1.02533	0.99057	0.991584	1.00756	1.03971	1.03042	1.08552	1.08847	1.07137	1.0917	1.0646	1.12221	1.06907	1.19891	1.25284	1.18036
		1.07889	1.08859	0.95991	1.01308	0.982677	0.928577	1.0011	1.05616	1.09775	1.11832	1.10679	1.11113	1.10229	1.04079	1.08549	1.04691	1.0673	1.15024	1.12314	1.13876	1.1943	1.11702	1.1039	1.17528	1.16703	1.1957	1.25752	1.48608	1.66536	1.89893	1.58918	1.94391	2.03231	1.88025	1.93679	1.6388	1.77696	1.85944	1.78509	1.9191	1.78655	1.75892	1.74214	1.63505	1.59958	1.51168	1.55167	1.63776
		0.875959	0.914149	0.983776	0.962747	0.993331	0.991842	1.06426	1.08902	1.08619	1.06893	1.09456	1.07282	1.06453	1.08836	1.10479	1.15888	1.1776	1.16732	1.10722	1.13628	1.14014	1.15123	1.18725	1.18106	1.19664	1.22428	1.23382	1.19079	1.15614	1.11294	1.09767	1.09069	1.12768	1.13001	1.10999	1.09913	1.13042	1.11424	1.08957	1.08757	1.1476	1.13696	1.13093	1.19512	1.22252	1.21601	1.21653	1.22061
[truncated: 6,162 more rows]
[truncated: 154 more columns]

## Sheet: tfeb Con_100Ins1xGluc
TFEBTR_TOP; cells cultured with 100ng/mL Ins 1xGluc; sampling time: 7.5 min; data are cells-by-time
Treated with: 0xEAA
[truncated: 5,930 more rows]
[truncated: 154 more columns]

## Sheet: tfeb Con_10Ins1xGluc
TFEBTR_TOP; cells cultured with 10ng/mL Ins 1xGluc; sampling time: 7.5 min; data are cells-by-time
[truncated: 4,794 more rows]
[truncated: 111 more columns]

[truncated: 3 more sheets: tfeb Con_10000Ins1xGluc, tfeb Con_200Ins1xGluc, tfeb Con_50Ins1xGluc]
