# Supplementary material for: Continuous sensing of nutrients and growth factors by the mTORC1-TFEB axis
Source: eLife. 2023 Sep 12;12:e74903. doi: 10.7554/eLife.74903 (PMC10547473; doi:10.7554/eLife.74903)
Supplement: Figure 5—source data 3. [file elife-74903-fig5-data3.xlsx]

## Sheet: tfeb Con_0xEAA1xGluc
TFEBTR_TOP; cells cultured with 0xEAA 1xGluc; sampling time: 7.5 min; data are cells-by-time
Treated with: 0ng/mL Ins
Replicate 1, Treated at time point 38
0.00213422	-0.036882	-0.0283892	-0.0328441	0.0153929	-0.036336	-0.0627933	-0.0154582	-0.0348607	0.016948	0.0638254	0.0418023	0.0760179	0.108256	0.174004	0.142937	0.165919	0.170458	0.254432	0.183058	0.207543	0.200258	0.14244	0.149633	0.0941763	0.0908734	0.111254	0.166942	0.194224	0.224725	0.236671	0.284078	0.288499	0.288784	0.218537	0.187004	0.209028	0.177258	0.157234	0.206287	0.281021	0.249429	0.23287	0.228684	0.228971	0.242508	0.209035	0.170797	0.15876	0.261787
0.0202097	0.0394395	0.0838573	0.15503	0.228509	0.22122	0.220266	0.306592	0.335144	0.353235	0.319672	0.314028	0.358484	0.281072	0.30623	0.260027	0.214205	0.21588	0.135306	0.140021	0.155995	0.165833	0.236624	0.185963	0.231953	0.278137	0.32958	0.375827	0.551048	0.746646	0.738866	0.750692	0.73567	0.73701	0.746642	0.725321	0.730824	0.692785	0.7023	0.703902	0.666036	0.654437	0.595203	0.581683	0.595948	0.616687	0.625873	0.583526	0.790893	0.889718
0.10645	0.14247	0.137823	0.216252	0.247543	0.232232	0.175958	0.225052	0.205301	0.162241	0.186423	0.189455	0.21754	0.159898	0.160764	0.15088	0.130881	0.129492	0.135529	0.129758	0.158793	0.167712	0.135953	0.106716	0.0815887	0.0695121	-0.0230496	0.0328708	0.0319932	0.0184079	0.0783512	0.0472472	0.0946619	0.0833823	0.0478827	0.0624172	0.0472744	0.0590279	0.0949145	0.0749445	0.0587217	0.0729566	0.105995	0.0737422	0.0386551	0.0821394	0.0343277	0.0310013	0.0686099	0.0702781
0.375234	0.390422	0.465819	0.479659	0.583273	0.594249	0.654641	0.695408	0.801708	0.723061	0.674348	0.690405	0.603226	0.557191	0.552572	0.568489	0.596621	0.602089	0.520471	0.583933	0.476327	0.532551	0.629724	0.621646	0.571121	0.549065	0.571424	0.550036	0.494129	0.447621	0.466128	0.421351	0.425567	0.392134	0.418872	0.414745	0.46724	0.531381	0.601083	0.683115	0.725933	0.758362	0.836775	0.719466	0.863819	0.963487	1.02475	1.04666	1.0154	0.917636
0.360145	0.427932	0.393878	0.352923	0.343768	0.45909	0.4761	0.449391	0.572206	0.605813	0.634621	0.66705	0.557298	0.613148	0.5603	0.592716	0.483654	0.637018	0.600266	0.637649	0.727961	0.821522	0.874478	0.791068	0.749461	0.905986	0.917554	0.884586	0.903645	0.935894	1.03126	1.05804	1.21148	1.31504	1.44455	1.41495	1.48967	1.85047	1.99656	2.02061	2.01494	2.17805	1.82527	1.86632	1.49586	1.45122	1.53387	1.66993	1.49993	1.31704
3.33837	4.26288	5.44148	3.96801	4.31632	3.51876	3.76728	3.06131	3.1572	3.0726	3.37113	2.82631	3.09848	2.83059	3.14752	3.80213	2.71467	2.0134	2.1883	1.91277	1.86405	1.63192	1.3896	1.5749	1.71538	1.64556	1.7585	1.70022	1.69093	1.91411	2.03388	2.23509	2.61173	3.24027	2.88902	2.25801	2.25915	2.11619	1.77275	1.86011	1.7731	1.74278	1.7146	1.79107	1.75851	1.65238	1.8523	2.20679	2.98173	2.99321
0.544508	0.575075	0.563059	0.623103	0.658914	0.702177	0.61256	0.612147	0.556197	0.508209	0.436888	0.463698	0.436992	0.41402	0.418949	0.449972	0.494658	0.545049	0.555251	0.553666	0.5919	0.664487	0.617034	0.670957	0.583198	0.548226	0.539819	0.508981	0.50172	0.44995	0.439977	0.448633	0.495733	0.487279	0.580746	0.700205	0.642009	0.681538	0.673104	0.787435	0.84995	0.798751	0.87468	0.930752	0.932104	1.01632	1.08931	1.10296	1.15179	1.20851
0.54226	0.530564	0.64956	0.708384	0.772246	0.7765	0.728023	0.685007	0.530433	0.554377	0.517869	0.45024	0.441791	0.440637	0.410297	0.388803	0.43805	0.396587	0.42701	0.420413	0.383454	0.440092	0.437127	0.378231	0.382233	0.431455	0.423833	0.411982	0.469367	0.437955	0.481108	0.434212	0.48189	0.43785	0.489855	0.536141	0.518871	0.496485	0.512591	0.533279	0.595327	0.671977	0.63542	0.619832	0.635413	0.675805	0.590945	0.64521	0.62835	0.589241
0.35518	0.408609	0.463865	0.414329	0.413781	0.355996	0.369739	0.363722	0.33036	0.326183	0.296533	0.28207	0.299418	0.315791	0.333788	0.326373	0.347394	0.367349	0.393041	0.404515	0.40297	0.358159	0.322821	0.283417	0.289346	0.318596	0.283871	0.296394	0.315033	0.345953	0.299879	0.373543	0.403604	0.37801	0.434534	0.401148	0.410425	0.408145	0.494681	0.444814	0.517992	0.516272	0.506017	0.500172	0.535952	0.543243	0.497887	0.468235	0.44511	0.513491
0.596104	0.573774	0.563611	0.629139	0.639639	0.777622	0.78767	0.868211	1.00063	0.969665	0.93286	1.00125	1.05246	1.06734	1.09226	0.97062	1.13277	1.20806	1.22639	1.1892	1.29465	1.43233	1.34119	1.11737	1.27729	1.11095	1.23552	1.23518	1.56451	1.3667	1.54581	1.33407	1.26533	1.21254	1.38482	1.29734	1.06223	1.09868	1.12321	1.07429	1.10812	1.01874	0.984404	0.897615	0.877371	0.918243	0.85864	0.875978	0.847412	0.836288
0.796714	0.850859	0.988459	1.17516	1.37132	1.54291	1.54214	1.68498	1.6549	1.56968	1.47647	1.42319	1.44183	1.45018	1.32284	1.16559	1.22406	1.27672	1.23371	1.24911	1.25633	1.27284	1.22281	1.14034	1.12733	1.19123	1.1861	1.18555	1.14204	1.31077	1.35574	1.45283	1.45154	1.6059	1.75771	1.7691	1.80134	1.82504	1.79672	1.69602	1.721	1.72461	1.70113	1.7085	1.53432	1.38832	1.36348	1.2962	1.29039	1.18719
0.640547	0.697221	0.743184	0.755443	0.826398	0.927746	1.05859	1.23515	1.35849	1.42004	1.41368	1.39668	1.34496	1.27601	1.20864	1.10399	1.04516	1.01252	1.01077	0.938029	0.97885	0.994255	1.03328	1.00874	1.03999	1.1378	1.10898	1.15695	1.19574	1.34584	1.38392	1.31958	1.41839	1.39287	1.46307	1.47294	1.50922	1.56222	1.65566	1.68585	1.67223	1.73931	1.79968	1.74497	1.81908	1.81034	1.69682	1.59878	1.40804	1.32355
0.555165	0.560017	0.59971	0.625292	0.639006	0.586129	0.673301	0.633677	0.683677	0.713882	0.680664	0.805251	0.787493	0.856391	0.895774	0.831123	0.879724	0.788289	0.806544	0.828131	0.795371	0.752486	0.753108	0.785724	0.82535	0.896063	0.919563	0.916167	0.936905	0.927457	0.967238	0.96017	0.879726	0.834168	0.746087	0.690931	0.674452	0.675604	0.698282	0.653589	0.634901	0.650078	0.607192	0.572878	0.557416	0.610439	0.640733	0.666707	0.683518	0.722321
0.455301	0.48486	0.516392	0.528722	0.59925	0.565781	0.596209	0.627983	0.65809	0.700345	0.769444	0.788722	0.829521	0.86129	0.90303	0.94898	1.01423	1.02067	1.04787	1.06076	1.11884	1.0365	0.856732	0.754341	0.64857	0.537983	0.515451	0.478364	0.480683	0.500456	0.500123	0.475401	0.468261	0.4509	0.418552	0.385818	0.376786	0.37112	0.362968	0.362499	0.342299	0.339848	0.348003	0.313577	0.347982	0.370319	0.401314	0.412521	0.40121	0.445747
0.439448	0.533202	0.60284	0.652497	0.681819	0.698892	0.716443	0.787612	0.80894	0.853058	0.89933	0.879914	0.893619	0.926174	0.924774	0.885129	0.85921	0.805889	0.808686	0.784145	0.746018	0.72986	0.688307	0.685452	0.679084	0.6836	0.675237	0.599584	0.553125	0.486439	0.453512	0.477305	0.465567	0.519439	0.469632	0.446261	0.430847	0.396778	0.419441	0.358925	0.342934	0.317519	0.286896	0.260245	0.270646	0.271015	0.278206	0.248072	0.265312	0.264969
0.679563	0.668155	0.679388	0.693441	0.789462	0.871699	1.13578	1.0114	1.11814	0.939982	1.04446	0.873012	0.88162	0.868014	1.06763	1.23162	1.215	1.07172	1.11558	1.07359	1.03313	1.11987	1.11389	1.08536	0.927122	0.781882	0.739256	0.670747	0.710612	0.584951	0.594694	0.59601	0.403474	0.46546	0.527745	0.383796	0.397372	0.371322	0.369552	0.286691	0.311977	0.30006	0.288396	0.372239	0.242494	0.290394	0.2816	0.26769	0.281045	0.286706
1.62446	1.79126	1.78313	1.79868	1.83898	1.76919	1.82456	1.78784	1.86942	1.88834	1.95769	1.93138	1.91856	1.94146	1.90042	1.78897	1.83139	1.82675	1.78454	1.68052	1.61411	1.55399	1.58293	1.7039	1.8568	2.14781	2.26982	2.41487	0.940444	0.933376	0.885567	0.765381	0.440615	0.987856	1.36579	1.95859	2.55505	2.40434	2.35401	2.2328	2.08269	2.1085	2.05346	2.07207	1.9668	1.83695	1.87301	1.77398	1.6552	1.63252
0.73615	0.759202	0.806847	0.80146	0.851867	0.885739	0.922535	0.932066	0.912704	0.858634	0.761562	0.748311	0.783651	0.758751	0.732298	0.76877	0.775647	0.780425	0.835093	0.846739	0.848008	0.856177	0.844839	0.813571	0.865477	0.87208	0.940198	0.978859	1.02652	1.03359	1.02738	1.106	1.11622	1.17266	1.23369	1.2607	1.22864	1.23036	1.21553	1.19947	1.21889	1.28824	1.26487	1.29004	1.21995	1.13949	1.09072	0.975463	0.921872	0.879172
0.385862	0.487165	0.56042	0.579933	0.619713	0.678611	0.679047	0.738083	0.745372	0.832576	0.871823	0.907731	0.831615	0.939095	0.947475	0.983029	0.932501	0.938808	1.01893	1.01261	1.00648	1.04772	0.957146	0.885003	0.82535	0.873569	0.871197	0.869449	0.820454	0.829249	0.777221	0.670187	0.674615	0.664908	0.667511	0.638837	0.590971	0.553219	0.589757	0.604137	0.621127	0.581882	0.539053	0.477351	0.578822	0.690514	0.880301	1.30744	0.570848	0.57553
0.553322	0.625315	0.577124	0.593092	0.599411	0.591113	0.635806	0.708083	0.707893	0.795948	0.814073	0.818202	0.847703	0.836634	0.927196	0.944941	0.91932	0.945882	0.959394	1.05068	0.957501	0.958754	0.969537	0.972415	0.984503	0.989743	0.999897	0.996605	1.02117	0.988845	1.03729	1.05339	1.05676	1.05863	1.06198	1.12028	1.15186	1.15134	1.14987	1.17583	1.15596	1.13982	1.07995	1.05352	1.09865	1.08128	1.12823	1.04069	0.993076	0.909526
0.614399	0.71881	0.665008	0.654235	0.694518	0.732292	0.814542	0.881004	1.01063	1.23596	1.26342	1.1961	1.09477	1.02401	0.91495	0.894243	0.84892	0.886777	0.826779	0.882823	0.99745	0.980843	0.963705	0.949818	0.99076	0.985216	0.954968	1.01335	1.07917	1.15655	1.18966	1.17973	1.34906	1.17797	1.19836	1.32633	1.13714	1.09121	0.948662	0.980639	1.01807	0.999351	0.971656	0.841495	0.717664	0.74796	0.675454	0.692869	0.724849	0.919408
0.740666	0.792936	0.809707	0.840939	0.891635	0.946897	1.00414	1.0065	0.98058	0.970765	1.11932	1.14631	1.20408	1.22687	1.16706	1.06047	1.15779	1.14819	1.068	0.994626	0.924446	0.874188	0.937677	0.918011	0.977832	0.973483	1.05999	1.01992	1.10166	1.14732	1.05593	1.04134	1.03184	1.00208	1.01316	0.982805	0.968268	0.960875	0.855698	0.824279	0.759786	0.73836	0.764955	0.796133	0.805665	0.838058	0.910347	0.95545	0.998312	1.02446
1.22375	1.11471	1.01337	0.974471	1.20719	1.22779	1.29649	1.33675	1.39656	1.42582	1.38515	1.72393	2.2645	2.86611	1.59062	1.96431	1.89234	2.55175	3.01964	3.20551	3.62444	3.84234	3.84378	3.87545	3.78307	4.15317	3.12459	3.35373	3.57072	2.47176	1.60289	3.84965	3.2451	3.0964	2.93402	2.75787	2.68105	2.39322	2.60385	2.36626	2.42938	2.53911	2.10758	2.27054	2.26779	2.34339	2.42731	2.42345	2.3534	2.17172
0.855945	0.881554	0.990072	0.967437	0.95213	0.803581	0.855023	0.899214	0.878385	0.922662	1.00742	0.959984	0.807413	0.768531	0.74998	0.745509	0.659324	0.656639	0.615855	0.755038	0.721333	0.773079	0.702473	0.753606	0.81615	0.912245	0.863048	0.850655	0.856629	0.884583	0.835388	0.872027	0.804194	0.869729	0.87622	0.87856	0.826159	0.745229	0.736362	0.732483	0.702124	0.733544	0.774038	0.747971	0.71041	0.687593	0.615337	0.616914	0.644745	0.608351
0.449662	0.474361	0.602479	0.681498	0.554292	0.595969	0.663497	0.66704	0.694568	0.692152	0.701382	0.722615	0.719902	0.74447	0.72526	0.747866	0.825465	0.941086	0.914102	1.0306	0.942211	0.890916	0.826104	0.731418	0.750729	0.738629	0.689577	0.661341	0.723095	0.700478	0.731937	0.772814	0.816919	0.855688	0.882467	0.902154	0.915478	0.927582	0.98203	1.09295	1.24648	1.31202	1.31678	1.355	1.41125	1.36069	1.28239	1.26698	1.28643	1.30492
0.600689	0.64998	0.800127	0.898431	1.2406	0.880208	0.696795	0.720566	0.38605	0.3148	0.736667	0.860026	0.812657	0.753698	0.616076	0.572477	0.527157	0.593308	0.603692	0.639854	0.624712	0.665024	0.731133	0.701809	0.785836	0.866568	0.91213	0.969329	0.88952	0.828148	0.803811	0.871718	0.939253	0.953599	0.971454	0.969101	0.958218	0.921706	0.969983	0.966605	0.972529	1.01165	0.990113	1.02762	0.993209	0.980619	0.953181	0.925401	0.870559	0.810905
0.763729	0.798968	0.926672	1.01267	1.11018	0.898566	0.808427	0.872768	0.894075	1.00916	0.982434	0.975576	0.926895	0.909416	0.880555	0.906329	0.891059	0.97621	1.03014	1.07827	1.06571	1.076	1.05007	1.08882	1.19896	1.21201	1.26416	1.32603	1.35408	1.29847	1.3398	1.41494	1.48232	1.47328	1.36647	1.30451	1.34967	1.39252	1.31601	1.33311	1.40232	1.32076	1.3708	1.39742	1.34122	1.31822	1.4013	1.2977	1.35086	1.40363
0.531379	0.444185	0.444006	0.784636	0.974717	0.961364	0.916292	0.800419	0.651205	0.568788	0.59191	0.623745	0.750762	0.821719	0.994131	1.10299	1.29951	1.29578	1.29273	1.22087	1.16385	1.19074	1.10517	1.05444	1.05346	0.952192	0.958682	0.990023	0.996931	1.04527	1.04091	1.00535	1.2004	1.15909	1.18732	1.16927	1.22316	1.25632	1.21993	1.34716	1.42182	1.28748	1.24515	1.12102	1.08146	1.11579	1.05507	1.10337	1.04242	0.820815
1.29742	1.2241	1.19784	1.25589	1.2586	1.23146	1.33643	1.21415	1.32249	1.42535	1.31875	1.17937	1.18691	1.15979	1.17298	1.04977	1.03578	1.01439	1.0107	1.01879	1.03646	0.996809	1.07646	1.12615	1.1993	1.15769	1.15247	1.1467	1.12529	1.19749	1.19333	1.11807	1.11286	1.08372	1.1116	1.17401	1.11708	1.08692	1.12247	1.05764	1.0921	1.11162	1.13318	1.33674	1.79194	1.73869	0.721772	0.69184	0.571589	0.508053
0.951921	0.986268	1.06918	1.08974	1.00759	1.00431	1.08247	0.971108	1.02756	1.04406	1.0106	1.04534	1.14329	1.20529	1.25322	1.19762	1.10415	1.11	1.09253	1.13936	1.14902	1.16561	1.05703	1.06317	0.950452	0.856553	0.831307	0.826369	0.802338	0.952352	0.958654	0.864327	0.862053	0.835979	0.834769	0.830213	0.808842	0.773865	0.745152	0.786065	0.796123	0.777547	0.720672	0.744406	0.685954	0.711132	0.71775	0.800995	0.819562	0.717233
0.495196	0.595475	0.668479	0.788309	0.848667	0.956418	1.14302	1.26763	1.25707	1.36362	1.44927	1.4335	1.4055	1.37449	1.27535	1.20299	1.15275	1.23923	1.16	1.16493	1.16998	1.23415	1.23361	1.19577	1.22062	1.22518	1.23185	1.2292	1.25813	1.30525	1.32462	1.3421	1.28937	1.27618	1.28785	1.21529	1.20079	1.24757	1.19572	1.19873	1.18327	1.15167	1.09256	1.047	1.01074	0.97059	0.954888	0.976814	0.966723	0.974617
0.902861	0.906142	0.880091	0.913788	0.910512	0.905853	0.870712	1.00542	0.886695	0.925895	0.844816	0.76802	0.901564	0.895218	0.908881	0.922071	0.887476	0.959131	1.00186	0.931252	0.901942	0.863372	0.835789	0.746396	0.743949	0.755999	0.763026	0.841635	0.944473	1.01591	1.19032	1.2195	1.28268	1.36117	1.44994	1.45048	1.46939	1.39437	1.34203	1.36084	1.26673	1.23829	1.14445	1.05966	1.0196	0.999302	0.967145	0.99894	1.05514	1.04804
0.583726	0.58112	0.596294	0.620554	0.648633	0.67276	0.687964	0.662949	0.648556	0.656523	0.619957	0.632757	0.578845	0.605963	0.620792	0.625065	0.700573	0.675817	0.700249	0.663269	0.692047	0.625213	0.582464	0.596445	0.655656	0.722398	0.608012	0.568	0.735656	0.734294	0.522876	0.714892	0.670816	0.735901	0.68675	0.684611	0.644361	0.707203	0.662428	0.666816	0.661674	0.689831	0.607851	0.5858	0.607862	0.583035	0.630525	0.541226	0.576053	0.618936
0.846937	0.8155	0.768728	0.748199	0.721418	0.644457	0.584368	0.631276	0.775928	0.918478	0.880664	1.04113	1.09195	1.24721	1.27278	1.49126	1.38472	1.33271	1.33088	1.39112	1.35424	1.4031	1.23881	1.51956	1.56448	1.7622	1.94058	1.98974	1.96025	1.99008	2.01019	1.9398	1.96467	2.03463	1.98528	2.07055	2.00206	2.08521	1.92009	1.79041	1.60353	1.51082	1.36473	1.24862	1.30596	1.18252	1.1338	1.22633	1.2318	1.18398
0.891908	0.888436	1.00711	1.04566	1.0828	1.12696	1.15647	1.19021	1.18388	1.11717	1.04797	1.04469	0.968247	0.970554	0.884	0.856144	0.936812	1.0057	0.990759	1.01151	1.02144	0.998619	1.05656	1.22534	1.24775	1.33274	1.40021	1.39567	1.3619	1.24753	1.10736	0.989158	0.879111	0.867656	0.832638	0.85063	0.804709	0.804317	0.836569	0.879336	0.945094	0.916546	0.882882	0.785657	0.749639	0.737738	0.718854	0.707204	0.727976	0.718157
1.87577	1.91398	1.39743	1.3429	1.40833	1.42676	1.56072	1.56697	1.52793	1.66042	1.64997	1.85564	1.50892	1.72194	1.74681	1.64556	1.68752	1.69927	1.76814	1.6325	1.91976	1.95873	1.91608	1.87802	2.02468	1.8764	1.79516	1.9232	1.8586	1.76718	1.87864	1.79165	1.85655	1.84603	1.92295	1.88613	1.95096	2.06882	1.99917	1.98976	2.08659	1.86302	2.07671	1.91911	1.91215	2.06364	2.09201	2.19754	2.17957	2.10788
1.14661	1.1719	1.14318	1.29486	1.25313	1.2947	1.21915	1.293	1.22978	1.30224	1.37343	1.40774	1.24324	1.18697	1.23205	1.20969	1.20183	1.16806	1.18104	1.17607	1.13663	1.14191	1.15044	1.14685	1.22724	1.28666	1.31814	1.29494	1.34874	1.34582	1.28009	1.3048	1.24045	1.21931	1.26993	1.27468	1.26176	1.29348	1.23624	1.27977	1.31498	1.36728	1.318	1.28283	1.28037	1.24211	1.20775	1.18124	1.07694	0.9936
1.09841	1.249	1.30683	1.35282	1.29757	1.40584	1.33891	1.30004	1.32095	1.42554	1.40664	1.43176	1.34801	1.29397	1.09576	1.06912	1.10027	1.02873	1.08788	1.05599	0.928432	0.829458	0.898888	0.869492	0.861693	0.930509	0.882429	0.921364	1.02473	1.09239	1.10208	1.09129	1.10854	1.17897	1.22821	1.3295	1.29468	1.24368	1.24227	1.41868	1.44324	1.39441	1.3485	1.24744	1.18811	1.1388	0.950189	0.900695	0.887814	0.877224
0.239326	0.22052	0.232451	0.253708	0.303963	0.363302	0.416164	0.417079	0.453608	0.494561	0.513366	0.481599	0.544807	0.604641	0.621794	0.647659	0.5956	0.651185	0.598493	0.571297	0.553614	0.567367	0.513138	0.481569	0.492016	0.461836	0.456582	0.528622	0.504757	0.525312	0.556961	0.568982	0.605876	0.672744	0.684557	0.689596	0.736397	0.802756	0.900568	1.05171	1.06154	1.12141	1.05682	1.03413	1.02466	0.94172	0.873132	0.877849	0.805825	0.704516
0.575401	0.49416	0.440922	0.484274	0.532248	0.601291	0.659402	0.728971	0.767926	0.788906	0.810004	0.84395	0.928143	0.91985	1.04452	1.09659	1.04748	1.14838	1.31187	1.30017	1.31606	1.38811	1.2858	1.20162	1.23351	1.18679	1.19637	1.16087	1.19476	1.18081	1.11406	1.24969	1.31379	1.34869	1.34767	1.42532	1.36574	1.26739	1.31967	1.48863	1.4272	1.51416	1.50896	1.61061	1.6796	1.7107	1.58916	1.78005	1.72701	1.84758
0.401	0.392657	0.392534	0.431331	0.432608	0.470317	0.467861	0.520723	0.524363	0.54613	0.541773	0.595573	0.615984	0.655317	0.645539	0.628019	0.545392	0.590978	0.620184	0.604947	0.578038	0.574181	0.551116	0.550785	0.585094	0.567502	0.583154	0.620997	0.604772	0.628645	0.56709	0.621899	0.589272	0.574532	0.546778	0.468429	0.461213	0.417922	0.380979	0.45032	0.637393	0.677524	0.608684	0.556793	0.527179	0.484632	0.503772	0.493989	0.517008	0.457352
0.651825	0.480177	0.610045	0.548645	0.598348	0.712261	0.870944	0.902661	0.978884	1.01576	0.977959	1.10601	1.03727	1.10101	1.06888	1.12231	1.26695	1.22378	1.30271	1.32101	1.25763	1.24087	1.2067	1.14276	1.15763	1.1214	1.15419	1.15407	1.05607	1.06479	0.994095	0.962327	0.941564	0.958667	0.924932	0.882477	0.901716	0.864319	0.874782	1.00352	0.990669	0.978987	0.964211	0.902239	0.862958	0.815741	0.783102	0.732839	0.680284	0.640147
0.378173	0.35797	0.397703	0.357786	0.378495	0.405762	0.457908	0.51034	0.556394	0.568718	0.653758	0.655109	0.698012	0.764752	0.857191	0.929636	0.896871	0.988691	0.963678	0.997896	0.943698	0.890108	1.02166	0.917443	0.945376	0.877343	0.913966	0.903636	0.814735	0.846427	0.727505	0.76404	0.766495	0.705886	0.66316	0.667952	0.645538	0.627896	0.637262	0.635787	0.607353	0.56091	0.516693	0.483969	0.475631	0.426175	0.421731	0.39612	0.419879	0.394376
1.06961	1.01231	1.02018	1.07169	1.06056	1.11081	1.12047	1.1252	1.28958	1.2236	1.41221	1.51914	1.57753	1.59607	1.63022	1.6531	1.62302	1.61771	1.58513	1.6992	1.60553	1.54016	1.6167	1.62286	1.60456	1.69955	1.71518	1.78671	1.85999	1.83873	1.87543	1.85971	1.96732	1.88792	1.8263	1.62958	1.50021	1.46245	1.36956	1.27039	1.21591	1.20695	1.09741	1.04855	0.984698	0.988336	0.840439	0.905308	0.885121	0.909875
0.689193	0.54604	0.586378	0.697871			0.442367	0.510703	0.572617	0.573058	0.689624	0.725539	0.755635	0.782913	0.886883	0.88107	1.08997	1.07908	1.14989	1.12586	1.15478	1.09033	0.979776	0.954048	0.945019	0.916479	0.873945	0.856723	0.843138	0.891701	0.826399	0.805317	0.836784	0.856007	0.869454	0.885529	0.881114	0.884459	0.885017	0.919844	0.931519	0.966651	0.956778	0.914918	0.893356	0.868298	0.898978	0.847755	0.879796	0.862607
0.762261	0.758617	0.786328	0.818348	0.811373	0.760125	0.785384	0.888919	0.794716	0.883012	0.853728	0.879389	0.93133	0.964189	0.899541	0.954217	0.881309	0.841688	0.802157	0.816102	0.762936	0.778047	0.790362	0.756096	0.821869	0.811421	0.884862	0.892566	0.925712	0.933259	0.938785	0.794096	0.841947	0.963862	1.08796	1.17389	1.09813	1.02049	0.834406	0.790597	0.957937	0.950997	0.84865	0.617968	0.588422	0.650896	0.712341	0.629549	0.782128	0.766468
0.596023	0.608594	0.678782	0.692443	0.802819	0.850615	1.01521	1.13406	1.21405	1.23347	1.23086	1.12837	1.00473	1.04475	0.848121	0.962721	0.899616	0.881174	0.87682	0.92807	0.816608	0.896315	0.881535	0.916041	0.935611	1.00547	1.10474	1.0537	1.10778	1.13732	1.17797	1.18415	1.1719	1.24106	1.28255	1.31543	1.26889	1.29032	1.30203	1.38819	1.38325	1.37864	1.28264	1.20032	1.16075	1.13279	1.11202	1.11357	1.11459	1.06201
1.04796	1.11613	0.975	1.09174	1.13017	1.19134	1.11766	1.12061	1.15215	1.14759	1.22359	1.37847	1.40694	1.44266	1.36172	1.25538	1.23606	1.15488	1.14753	1.15687	1.0604	1.07373	0.992746	0.926822	0.906984	0.836902	0.844325	0.791315	0.839735	0.856602	0.805085	0.787449	0.78188	0.807131	0.803898	0.795321	0.864698	0.85364	0.908117	0.988265	1.01875	1.03649	1.06152	0.949523	0.922312	0.880519	0.854798	0.800447	0.851181	0.902153
1.2352	1.28868	1.3491	1.40591	1.50785	1.46336	1.47739	1.52729	1.52001	1.50118	1.5112	1.52303	1.49484	1.57336	1.61169	1.56071	1.63335	1.69887	1.60981	1.38248	1.32383	1.32994	1.30184	1.28682	1.39019	1.40172	1.46496	1.46593	1.49814	1.45207	1.47282	1.4132	1.49042	1.44703	1.45129	1.37733	1.3449	1.34016	1.27411	1.19096	1.1679	1.06694	1.03231	0.975019	0.943722	0.943609	0.951658	0.960993	0.995766	1.05228
0.268236	0.276624	0.283215	0.313923	0.340771	0.380398	0.378046	0.420654	0.43648	0.481346	0.531754	0.576008	0.58922	0.628633	0.606298	0.62398	0.607319	0.614926	0.615875	0.683099	0.645825	0.613195	0.668012	0.687082	0.711424	0.682956	0.669144	0.697395	0.706279	0.766239	0.825731	0.874038	0.912272	0.959978	0.901175	0.880691	0.794882	0.753293	0.70986	0.67225	0.643482	0.625428	0.617163	0.61272	0.605559	0.619287	0.616546	0.571506	0.585244	0.600679
0.458774	0.438025	0.402549	0.422835	0.437304	0.435278	0.463451	0.471372	0.524122	0.495502	0.529205	0.599863	0.59243	0.654878	0.68282	0.692695	0.703703	0.725157	0.796912	0.700836	0.661762	0.657029	0.644847	0.663862	0.675934	0.745152	0.736518	0.716658	0.792434	0.963438	0.748172	0.667284	0.944288	0.854397	0.777646	0.622689	0.541061	0.537027	0.442876	0.58647	0.593448	0.595465	0.61159	0.596361		0.633794	0.684518	0.724487	0.741636	0.711991
1.43513	2.13869	1.56344	1.47442	1.21635	1.27739	1.56683	2.17161	2.31681	2.54234	1.90067	1.7107	1.28587	1.13537	1.1174	1.08911	0.884924	1.16234	1.07404	1.12382	1.32877	1.23467	1.47991	1.42491	1.77868	1.41112	1.27206	1.29686	1.19839	1.29325	1.19635	1.58757	1.50583	1.63126	1.90711	1.84329	1.93597		1.3472	2.92326	2.76922	2.83566	3.27623	2.98521	3.25004	2.74981	3.14211	2.74579	2.50435	2.97359
0.788045	0.798101	0.83147	0.900342	0.90046	1.00687	1.02197	1.31891	1.3233	1.4221	1.52215	1.383	1.39027	1.47271	1.48144	1.54775	1.41115	1.26712	1.07086	0.940256	0.896055	0.878192	0.807596	0.789307	0.790077	0.844282	0.884089	0.948624	0.995503	1.01627	1.11563	1.12344	1.10103		1.13902	1.31003	1.25654	1.25955	1.31751	1.26736	1.22069	1.11963	1.05895	0.923739	0.871035	0.798416	0.73572	0.680791	0.732286	0.709346
0.633513	0.610852	0.624038	0.592604	0.625279	0.633486	0.65529	0.67796	0.608439	0.622345	0.582349	0.580697	0.554393	0.51943	0.500982	0.491468	0.509134	0.520553	0.556054	0.557346	0.626762	0.610714	0.654308	0.721637	0.8233	0.964542	1.14421	1.53502	1.85883	0.898414	0.935064		0.764154	0.774845	0.758924	0.877593	1.09522	1.1789	1.22975	1.21223	1.18692	1.14492	1.17567	1.18692	1.10655	1.01251	0.935362	0.885347	0.812488	0.812665
1.91275	1.19193	0.752852	0.40883	1.15056	0.45605	0.460462	0.451072	0.484136	0.649149	0.666337	0.522088	0.508499	1.49314	2.55718	2.33006	0.532931	0.515351	0.637735	1.70118	1.81845	1.87602	1.40941	1.37567	1.90299	1.69473	1.50094	1.33295		1.20348	1.04481	1.1159	1.11075	1.15263	1.32607	1.44678	1.33015	1.42533	1.46418	1.35015	1.57815	1.51615	1.48551	1.45369	1.59909	1.5949	1.78638	1.81823	1.67629	1.80031
0.89874	0.909737	0.947419	0.872656	0.911384	0.789905	0.785362	0.779654	0.769615	0.748062	0.744775	0.740264	0.784173	0.76565	0.837447	0.879404	0.914879	0.923246	1.02392	1.07609	1.1106	1.06023	1.07397	1.17953	1.15676	1.24142		1.16756	1.14571	1.15689	1.24483	1.34275	1.3359	1.42265	1.43695	1.51509	1.44617	1.41668	1.32831	1.21664	1.09845	1.03391	0.974182	0.895612	0.889489	0.899124	0.846495	0.832843	0.853786	0.873365
0.365865	0.387855	0.408382	0.436859	0.539685	0.632587	0.682703	0.750546	0.759389	0.736026	0.700429	0.689421	0.649667	0.627619	0.660883	0.634823	0.659258	0.643546	0.623137	0.679882	0.638594		0.625104	0.679422	0.655636	0.682345	0.69658	0.713601	0.777795	0.794622	0.787118	0.834458	0.822272	0.777683	0.793299	0.802767	0.773198	0.785137	0.80481	0.78005	0.712358	0.775757	0.789529	0.798297	0.763551	0.831969	0.806177	0.760376	0.703672	0.694521
0.751516	0.691482	0.739204	0.680167	0.663664	0.70762	0.623992	0.598958	0.545995	0.636194	0.560738	0.579129	0.659312	0.64568	0.643624	0.690604	0.750657	0.754558	0.656594	0.826379		0.71538	0.76011	0.822598	0.870693	0.870859	0.872296	0.889552	0.973787	0.943511	1.04688	1.09709	1.09862	1.01435	1.00633	1.02527	0.961235	0.957188	0.934976	0.923046	0.935711	0.978428	0.973094	0.962568	0.886982	0.877806	0.854404	0.853817	0.691397	0.619653
0.0845328	0.0984365	0.151708	0.20466	0.215678	0.233026	0.237422	0.307187	0.291296	0.308414	0.311518	0.220997	0.209449	0.18132	0.268148	0.271033	0.228006	0.269344	0.332372		0.355769	0.337959	0.372713	0.443854	0.426872	0.439326	0.470036	0.463504	0.407603	0.371779	0.481822	0.587969	0.602595	0.618613	0.540318	0.558357	0.569378	0.546962	0.512927	0.52026	0.445606	0.369298	0.290784	0.276111	0.299376	0.280117	0.276888	0.266398	0.289994	0.67675
0.639006	0.615861	0.596684	0.636081	0.601636	0.625884	0.613716	0.510424	0.469741	0.426616	0.438963	0.451404	0.436388	0.457437	0.542556	0.518121	0.595929	0.622629	0.575029		0.606551	0.564475	0.58471	0.620057	0.750705	0.810384	0.754673	0.805147	0.799991	0.851875	0.853153	0.881754	0.970629	0.934026	1.04672	0.989309	0.996663	1.00341	0.915393	0.844338	0.797951	0.725274	0.679674	0.63561	0.656658	0.638887	0.630147	0.694286	0.7191	0.704307
0.694254	0.643427	0.519438	0.587991	0.711693	0.755465	0.83361	1.04652	1.39643	1.4961	1.22924	0.644873	0.519869	0.680867	0.631921	0.699068	0.772375	0.74515		0.598173	0.719852	0.539987	0.657581	0.522892	0.490463	0.500188	0.416301	0.388709	0.383502	0.377194	0.439997	0.527276	0.523331	0.540434	0.575948	0.609585	0.624953	0.660506	0.699709	0.722508	0.794348	0.894569	0.761137	0.909662	0.856801	0.769904	0.780806	0.729199	0.810904	0.779272
1.14284	0.926144	1.21811	1.26982	1.2922	1.30353	1.20585	1.14727	1.15741	1.43041	1.45677	1.34975	1.42077	1.38545	1.45217	1.48202	1.72886	1.4639		1.19775	1.47149	1.50739	1.36708	1.3759	1.59959	1.49186	1.62562	1.38977	1.31695	1.49402	1.46039	1.19425	1.52738	1.64397	1.62161	1.57138	1.69246	1.86962	1.91211	2.39405	3.00426	2.57541	3.25351	4.52826	3.78367	3.93238	3.50189	1.73247	1.95585	3.74314
0.85324	1.54711	0.738188	0.732442	0.458714	0.727078	0.996568	1.46393	1.6563	1.24622	1.05979	0.990808	1.02113	0.971478	1.07207	1.11102	1.10385	1.24925		1.36043	1.21668	1.25963	1.24291	1.26992	1.32358	1.34682	1.41829	1.52413	1.51169	1.51352	1.43359	1.49078	1.49299	1.518	1.62089	1.64686	1.64978	1.68504	1.60778	1.59546	1.57467	1.5507	1.34267	1.31856	1.30925	1.27291	1.27713	1.26096	1.26863	1.2946
0.58067	0.572441	0.521387	0.524877	0.58507	0.606039	0.58423	0.572615	0.583938	0.547827	0.533784	0.470136	0.436338	0.407977	0.414219	0.420556	0.41776		0.447749	0.470911	0.473597	0.464758	0.478534	0.490054	0.512928	0.513002	0.549853	0.565496	0.609841	0.713491	0.78313	0.862466	0.947715	0.950686	0.935418	0.905162	0.923143	0.890399	0.860762	0.775589	0.75321	0.71507	0.678207	0.630476	0.61715	0.615854	0.610006	0.611442	0.649034	0.691594
0.852939	0.931639	0.879573	0.870872	0.960512	0.862726	0.736013	0.702556	0.683096	0.590363	0.691021	0.611383	0.684756	0.651969	0.644494	0.609612		0.650963	0.612901	0.689992	0.653586	0.650854	0.672021	0.647259	0.6667	0.690116	0.686342	0.726833	0.718235	0.763897	0.640795	0.568716	0.648837	0.634759	0.620308	0.573315	0.503006	0.457019	0.351849	0.344761	0.41121	0.45786	0.420844	0.372034	0.387294	0.420702	0.413371	0.430476	0.457242	0.354835
0.523495	0.616188	0.706113	0.791882	0.82259	0.850973	0.856638	0.85909	0.802911	0.87876	0.830542	0.871377	0.893681	0.883918		1.09085	1.19682	1.91204	0.853991	0.758385	0.854257	0.87695	0.83542	0.674751	0.918774	1.14299	1.31356	1.20022	1.13863	1.02529	1.02121	0.906625	0.897098	0.943328	1.04002	1.06151	1.03156	1.1317	1.08797	0.986523	0.895305	0.863	0.789706	0.820506	0.946825	0.548352	0.698559	0.656101	0.521659	0.507229
0.792956	0.917225	1.20367	0.756532	0.396783	0.41993	0.61666	0.843082	0.964387	0.961337	0.924695	0.851276		0.876803	0.889224	0.804799	0.82686	0.847688	0.845276	0.846531	0.925212	0.96771	1.01272	1.09455	1.1579	1.17589	1.1802	1.17295	1.16359	1.20976	1.17032	1.19106	1.18188	1.14791	1.17366	1.17366	1.2572	1.20086	1.19754	1.16371	1.24464	1.24125	1.14494	1.13886	1.12571	1.14999	1.15453	1.20072	1.27179	1.2909
0.645911	0.656636	0.626271	0.66944	0.672689	0.52633	0.535149	0.525922	0.456066	0.479607	0.335047	0.558149		0.556781	0.566907	0.57672	0.562043	0.679487	0.582228	0.666757	0.619814	0.733296	0.708324	0.754516	0.700071	0.699711	0.748106	0.773596	0.88463	0.911746	0.983651	1.05317	1.0998	1.1675	1.13815	1.07256	1.08128	1.16714	1.26358	1.44171	1.45937	1.34811	1.35948	1.50622	1.49655	1.4613	1.56913	1.70395	1.84594	1.94223
0.288914	0.254501	0.251528	0.237854	0.300269	0.34612	0.391566	0.410133		0.493474	0.45236	0.512677	0.642279	0.647047	0.674847	0.706194	0.689452	0.714285	0.714482	0.6817	0.708293	0.799398	0.744042	0.770774	0.683142	0.733605	0.717607	0.743708	0.644038	0.642686	0.49716	0.547341	0.535513	0.510168	0.50475	0.571806	0.562989	0.572761	0.61331	0.813541	0.731245	0.73462	0.73295	0.733264	0.750208	0.731299	0.696657	0.786776	0.87443	0.801582
4.78995	3.06478	2.08958		0.781823	1.04283	1.04997	0.975609	1.1868	0.93938	1.2138	0.932367	0.978637	1.05743	0.992425	1.15421	0.922816	0.977474	1.31396	1.14221	0.922876	1.00939	1.12348	1.24887	1.4652	1.12344	2.00563	1.71722	2.00214	1.36141	1.77096	1.93511	1.88977	1.69298	1.90765	1.84749	1.74411	1.2799	1.47887	0.958961	1.36377	0.88092	0.990225	1.09268	0.874818	0.777268	0.743021	0.672663	1.17497	1.30882
0.99767	0.9909	0.952773	1.15812	1.00012	1.45861	1.44015	1.30569	1.37949	1.30518	1.19175	1.18395	1.10758	1.06486	1.12493	1.16807	1.25514	1.26951	1.26464	1.24234	1.23124	1.27521	1.22698	1.17101	1.19751	1.18991	1.24972	1.19159	1.18317	1.16672	1.18614	1.20257	1.25844	1.25364	1.26897	1.18228	1.19678	1.11605	1.09279	1.11633	1.14645	1.07228	1.02485	0.972035	0.938337	0.887821	0.893707	0.875486	0.86162	0.849641
0.648556	0.477987	0.431752	0.23494	0.404151	0.72926	0.71732	0.520723	0.363358	0.322929	0.373504	0.350747	0.39141	0.396415	0.40062	0.451407	0.521426	0.580231	0.503602	0.6508	0.670477	0.586671	0.502575	0.54012	0.489584	0.46349	0.492487	0.628179	0.638129	0.646347	0.619903	0.612534	0.607687	0.608815	0.651728	0.674638	0.639822	0.635111	0.609677	0.495664	0.547055	0.40493	0.342865	0.510232	0.414651	0.528866	0.560752	0.61616	0.55312	0.531064
0.793984	0.89859	0.995576	1.05877	1.1575	1.17094	1.12211	1.07129	1.09139	1.00788	1.09345	1.12252	1.11391	1.11599	1.06841	0.957723	0.99308	0.910599	0.89924	0.810652	0.800262	0.817592	0.969254	1.05973	1.0738	1.22442	1.14704	1.07219	0.998674	0.895851	0.885542	1.07423	1.06795	1.03223	0.921837	0.912835	0.819453	0.887872	0.884801	0.948576	0.958216	1.06522	1.04453	1.04321	0.987059	0.91552	0.847176	0.825099	0.746072	0.773266
1.57273	1.84679	1.80252	1.76979	1.64463	1.49483	1.56669	1.61662	1.52247	1.6327	1.38889	1.36483	1.20022	1.15568	1.18307	1.20382	1.15764	1.22953	1.52302	1.69794	1.61551	1.73758	1.72427	1.60031	1.71572	1.4419	1.52926	1.49431	1.84953	0.875541	0.816549			1.05475	1.35437	1.61548	1.61415	1.65519	1.566	1.47958	1.68418	1.80277	1.42397	1.60834	1.25898	1.14077	1.25614	1.03877	1.29736	1.2642
0.559874	0.547078	0.533454	0.602954	0.647491	0.674956	0.667624	0.726526	0.94617	0.916272	0.870645	0.655496	0.842132	0.955416	1.00483	0.914789	0.824216	0.711718	0.677203	0.677063	0.65335	0.702481	0.725684			0.743563	0.736052	0.773796	0.797993	0.853024	0.916912	0.929817	0.979266	1.06579	1.13644	1.10297	1.12977	1.20382	1.252	1.31701	1.32111	1.27468	1.14497	1.01057	0.978911	0.963159	0.905676	0.865655	0.899253	0.84184
0.748756	0.813056	0.822693	0.872946	0.913619	0.971756	1.07221	1.14525	1.22647	1.23504	1.21336	1.16925	1.22409	1.25855	1.59294	1.40366	0.877846	0.905515	0.877325		1.02292	1.08423	1.18432	1.23487	1.37544	1.48965	1.41387	1.40803	1.22083	1.25374	1.22246	1.26917	1.38029	1.31706	1.38725	1.34075	1.40903	1.46876	1.52788	1.55624	1.58805	1.56233	1.46396	1.56652	1.55675	1.64533	1.72053	1.77301	1.76581	1.74081
0.622723	0.648706	0.631952	0.602715	0.53864	0.549993	0.565024	0.523665	0.539371	0.57791	0.640327	0.645712	0.709841	0.805124	0.790864	0.810833	0.922631	0.866352			0.881723	0.983754	0.898975	0.849623	0.807783	0.716989	0.713726	0.714204	0.661627	0.718427	0.72017	0.744452	0.79873	0.77695	0.766338	0.77158	0.789466	0.774666	0.75916	0.848787	0.961559	1.13701	0.616301	0.66529	0.705441	0.410304	0.762559	0.670522	0.800218	0.791108
0.716378	0.738722	0.761455	0.780769	0.789281	0.919797	0.956951	1.14781	1.16749	1.297	1.36859	1.33918	1.29284	1.18261	1.30896	1.12892		1.13121	1.40014	1.32773	1.12914	1.18677	1.16105	1.08716	1.04134	1.00764	0.957943	1.07243	0.977143	0.96473	0.973475	0.914845	0.928667	0.833297	0.740629	0.74772	0.837311	0.803439	0.744137	0.818496	0.796028	0.787617	0.852346	0.865328	0.953143	0.979571	0.948801	0.787961	1.31258	1.5095
0.670967	0.774941	0.843567	1.03005	1.35122	1.33124	1.18762	1.58643	0.990724	0.928544	0.954555	0.675433	0.741892	0.990406	0.869465		0.890035	0.799813	0.999832	0.693652	0.582741	0.808087	0.735538	0.650273	0.774751	0.777539	0.689409	0.668756	0.724691	0.658532	0.600985	0.639528	0.734171	0.724763	0.817468	0.771071	0.71933	0.733901	0.726796	0.782064	0.772601	0.854258	0.966852	0.826534	0.976494	1.0739	1.02814	1.08407	1.00778	0.745454
0.713487	0.775819	0.836182	0.826028	0.749002	0.766303	0.695516	0.694716	0.865961	0.911739	0.90906	1.0212	1.05185	0.968673	0.982168			0.886275	0.902264	0.824909	0.830363	0.840038	0.846893	0.831146	0.825309	0.870625	0.931124	0.981442	1.10939	1.11808	1.20211	1.19732	1.22918	1.18889	1.26937	1.37965	1.34565	1.34227	1.28672	1.21585	1.17162	1.12263	1.06241	1.028	1.00501	0.956977	0.934655	0.921289	0.949985	1.00498
0.415203	0.416216	0.413326	0.42265	0.430353	0.444696	0.440698	0.485005	0.483444	0.489211	0.498926	0.494062	0.591124	0.551944		0.472447	0.513139	0.519029	0.505207		0.536908	0.540782	0.567953	0.596842	0.595467	0.619373	0.681151	0.74908	0.794649	0.816093	0.865896	0.938649	1.03764	1.09023	1.14051	1.21693	1.27741	1.31342	1.38027	1.41059	1.3621	1.32365	1.22331	1.14197	1.0272	0.997327	1.02224	0.992726	0.928664	0.886229
1.14972	1.2463	1.19912	1.23113	1.31295	1.42815	1.54166	1.69554	1.85781	1.94422	1.95005	1.97251	1.88297	1.84323		1.96917	1.84123	1.90304	1.83185	1.6187	1.61528	1.67746	1.62471	1.58584	1.53495	1.59035	1.55848	1.59157	1.53729	1.51921	1.46523	1.43236	1.40498	1.3384	1.33156	1.2729	1.2545	1.17413	1.1501	1.10841	1.07341	1.06647	1.16918	1.01766	1.00655	0.934429	0.839251	0.801678	0.82133	0.545089
0.991994	1.02432	1.03571	1.09944	1.2559	1.27978	1.24256	1.29117	1.42009	0.986418	0.821065	0.837246	0.841021			1.54919	1.45286	1.27125	1.42269	1.32976	1.24595	1.29133	1.34336	1.36056	1.39681	1.39391	1.51668	1.59346	1.63421	1.65852	1.62803	1.70195	1.65696	1.6249	1.60129	1.57143	1.49358	1.44696	1.34599	1.32682	1.29149	1.23414	1.10728	1.12287	1.06672	1.06082	1.14494	1.09982	1.0742	1.06463
0.160428	0.161477	0.187864	0.204869	0.328451	0.367044	0.424758	0.37033	0.421933	0.378599	0.416062		0.366532	0.291285	0.292477	0.288489		0.159988	0.169357	0.209451	0.205061	0.202387	0.305275	0.24563	0.201747	0.230642	0.206729	0.145218	0.183609	0.168344	0.221189	0.239001	0.234018	0.206003	0.193574	0.195154	0.216488	0.275069	0.280557	0.304185	0.308112	0.306988	0.278874	0.287475	0.274034	0.248422	0.2324	0.314217	0.19306	0.211091
0.914085	0.921207	0.893102	0.851366	0.736179	0.677786	0.740924	0.757184	0.68083	0.714274	0.760126		0.870742	0.788748	0.842646	0.728825	0.870569	0.918529	1.05018	0.97505	1.04584	1.10188		1.0064	1.05307	1.02248	0.967522	1.01009	0.899515	0.893444	0.923523	1.00999	1.22686	1.14629	1.00573	1.00996	1.14051	1.06201	1.08297	0.896882	0.731249	0.672053	0.662035	0.569996	0.582824	0.646881	0.618769	0.555622	0.598868	0.585847
0.788808	0.592542	0.388007	0.524641	1.09711		1.04048	1.56428	1.77763	1.38241	2.41806	2.68542	1.32122	2.14221	2.71157	2.81142	2.83131	2.86749	1.802	2.11878	2.02401	2.16186	2.04647	1.82439	2.04231	1.77607	1.6399	1.52269	1.71198	1.65265	1.52366	1.6144	1.65672	1.58405	1.55732	1.63592	1.57061	1.46123	1.49371	1.27759	1.32636	1.18511	1.02542	1.07708	0.977118	1.01444	1.00096	0.970209	1.01022	1.00356
1.64796	2.37326	0.752547			0.50491	0.931651	1.0504	1.16408	1.03886	0.887211	0.764655	0.784866	0.919725	0.960589	1.01033	0.973984	0.929743	0.850195	0.880992	0.888537	0.851268	0.877936	0.877041	0.893417	0.832325	0.832347	0.832849	0.859274	0.92874	0.912779	0.9125	0.897382	0.963869	0.899161	0.936921	0.909067	0.913654	0.852012	1.1265	1.09088	1.02532	0.983643	0.90355	0.868386	0.861837	0.793944	0.817547	0.79855	0.777691
0.867535	0.932265	0.924919	0.973591	1.06111	1.23301	1.4179	1.68212	1.69175	1.71027	1.71287	1.60244	1.45299	1.2894	1.28109	1.22685	1.32003	1.21967	1.21985	1.38694	1.24473	1.25187	1.23901	1.20845	1.2801	1.22848	1.19838	1.15705	1.20305	1.19062	1.17824	1.16153	1.13371	1.15143	1.13705	1.10527	1.09607	1.05062	1.03427	1.01898	1.05878	1.05317	0.967149	0.934624	0.977117	0.905744	0.891903	0.891781	0.845412	0.862343
1.48804	1.52274	1.50422	1.6598	1.69646	1.72373	1.70285	1.60815	1.60675	1.50326	1.40621	1.43532	1.36576	1.24278	1.20594	1.15418	1.22289	1.20964	1.26666	1.26984	1.27898	1.42071	1.49938	1.40702	1.4391	1.39284	1.35133	1.48359	1.57438	1.65055	1.68858	1.59063	1.57425	1.49542	1.33402	1.22377	1.04376	0.854574	0.798103	0.734001	0.789504	0.870106	0.996597	1.05721	1.21537	1.32763	1.37497	1.34792	1.25925	1.09842
0.432607	0.421087	0.350949	0.389977	0.390511	0.423951	0.477189	0.463481	0.43264	0.491348	0.468611	0.468287	0.502427	0.500148	0.441367	0.449365	0.467357	0.490197	0.5304	0.511783	0.548367	0.600664	0.559453	0.564598	0.716741	0.766864	0.867369	1.02092	1.0367	1.00597	1.02045	0.974813	1.02906	0.954114	1.06862	0.968655				0.986354	1.01019	0.936916	0.883193	0.960294	0.927824	0.884241	0.828509	0.812556	0.837494	0.912875
0.0976537	0.10886	0.147899	0.165148	0.230658	0.345228	0.367695	0.473	0.62859	0.789104	0.812703	0.762532	0.723883	0.780699	0.690115	0.647267	0.663294			0.634421	0.676917	0.595612	0.5674	0.582356	0.625173	0.743283	0.806194		0.897475	0.828433	0.957211	1.07119	1.17163	1.1509	1.19879	1.2551	1.12948	1.01743	1.00629	1.03183	1.01448	0.959275	1.12472	0.999645	0.998748	1.03341	1.10456	1.15762	1.11855	1.04377
0.852433	0.832504	0.867643	0.775058	0.74945	0.892888	0.978057	0.996237	1.0236	1.07356	0.968017	1.03787	0.889201	0.830209	0.898984	1.00153		1.18446		1.24078	1.34493	1.36258	1.58853	1.99403	2.02008	0.720289	0.633175	0.582419	0.458901	0.412341	0.592594	0.617985	0.649861	0.791108	0.84064	0.909506	1.06476	1.22564	1.41696	1.40917	1.50697	1.45181	1.58939	1.55168	1.40292	1.40345	1.25321	1.08554	1.06408	1.03476
0.755687	0.724854	0.799787	0.935228	0.973285	1.02099	1.14621	1.19562	1.25203	1.34933	1.61186	1.59598	1.84495	1.8097	1.9642	2.14485		2.22719		1.89801	2.01891	2.01781	2.1476	1.88582	1.90109	1.81125	2.00803	1.91512	1.95665	2.09251	1.93099	1.56257	1.44977	1.59322	1.14375	1.29256	0.912731	0.968618	0.897571	1.02065	0.972401	0.902407	1.20537	1.02321	1.21661	0.979727	1.00692	1.06058	1.07261	1.06994
0.367835	0.343415	0.290861	0.304452	0.316837	0.343886	0.506781	0.754564	0.858648	0.990377	1.03096	1.00363	1.0185		0.957066	0.976912	0.900554	0.941744	0.963942	0.972947			1.06547	1.04362	0.984312	0.863517	0.848453	0.80271	0.80018	0.786527	0.826007	0.844704	0.891803	0.889165	0.914716	0.904185	0.940935	1.02861	1.02921	0.997249	0.997206	0.962865	0.891542	0.886665	0.871612	0.878823	0.882216	0.856305	0.796553	0.740694
0.564812	0.623079	0.594095	0.61397	0.578182	0.566265	0.574683	0.584046	0.631997	0.652842	0.65675	0.625216	0.744374		0.772713	0.74204	0.748475			0.948716	0.847754	0.791593	0.920725	0.910293	0.953372	0.956849	1.00713	1.0661	1.00424	0.973694	0.813686	0.774112	0.701751	0.632377	0.653558	0.527679	0.561021	0.54621	0.553855	0.562564	0.556326	0.558976	0.52651	0.52071	0.485346	0.557042	0.57178	0.543888	0.588915	0.49444
0.361814	0.416004	0.37744	0.349124	0.362748	0.428394	0.467453	0.540199	0.575675	0.665898	0.776082	0.764335	0.827518		0.986486	0.859881	0.793333	0.820846			0.832922	0.809698	0.800163	0.869869	0.78906	0.850181	0.836825	0.815166	0.830271	0.872821	0.887597	0.899132	0.904899	0.875983	0.81878	0.755595	0.683544	0.615909	0.482183	0.41324	0.4426	0.423727	0.401879	0.422714	0.408795	0.334148	0.336634	0.392283	0.388239	0.44856
0.32727	0.348802	0.339826	0.345763	0.332496	0.347331	0.406957	0.408751	0.492306	0.937722		0.488758		0.562654	0.478036	0.42628	0.434416	0.453927	0.424979	0.449598	0.470284	0.466236	0.458223	0.521591	0.561842	0.591974	0.649328	0.604293	0.594219	0.615219	0.61754	0.606615	0.577553	0.599259	0.62366	0.653484	0.705256	0.7273	0.705358	0.7064	0.645063	0.631539	0.605184	0.583822	0.481631	0.446842	0.406278	0.418197	0.38264	0.35829
0.54949	0.61026	0.590957	0.567374	0.601525	0.574645	0.631992	0.708144	0.687617	0.725102		0.800755	0.847619	0.883798	0.854009	0.847168	0.807561	0.844145	0.760936		0.751876	0.634146	0.65451	0.60777	0.577066	0.617451	0.654988	0.645706	0.579987	0.582039	0.566747	0.531831	0.560995	0.573361	0.604135	0.527345	0.527618	0.550663	0.540352	0.519421	0.501283	0.464842	0.431453	0.446366	0.46425	0.465137	0.46482	0.475002	0.47417	0.491631
0.429478	0.44613	0.465804	0.501558	0.43705	0.391143	0.389164	0.385811	0.443861	0.446488		0.474154	0.486128	0.460426	0.509894	0.450391	0.490937			0.612041	0.643679	0.563196	0.572186	0.547626	0.53041	0.430934	0.460364	0.537532	0.554851	0.622961	0.503974	0.568695	0.558842	0.623934	0.599817	0.559818	0.527585	0.560275	0.544276	0.58474	0.607119	0.6085	0.576527	0.625597	0.560471	0.492881	0.456118	0.444319	0.465189	0.458715
1.1848	1.26769	1.38458	1.35948				1.73588	1.62649	1.61862	1.38978	1.29257	1.31048	1.35676	1.50348	1.39662	1.31795	1.39118	1.26605	1.30413	1.22517	1.34543	1.36312	1.52667	1.49458	1.68676	1.62138	1.63713	1.45036	1.38217	1.23095	1.21512	1.26017	1.21981	1.18463	1.25706	1.27405	1.23047	1.30023	1.26464	1.2285	1.23754	1.36377	1.43942	1.43564	1.44085	1.43129	1.39322	1.27807	1.26853
0.923499	0.98663	0.861881	0.880534		0.963925	1.1493	1.02315	0.916517	0.957271	0.930058	0.934569	0.867659	0.782962	0.672226	0.686731	0.73534	0.794249	0.863202	0.797708	0.790468	0.838412	0.884797	0.912145	1.0208	1.08417	1.16414	1.29808	1.43208	1.44502	1.44454	1.32337	1.18302	1.13954	1.06333	1.00353	0.980225	0.989614	0.95359	0.939972	0.951467	0.942934	0.933415	0.888656	0.870457	0.817326	0.799904	0.765556	0.788202	0.872941
1.18732	1.14131	1.22083	0.908338	0.967865	0.477134	0.471927	0.481237	0.539852	0.571974	0.597765	0.605517	0.658696	0.661061	0.685245	0.756268	0.747117	0.743434	0.780247	0.821738	0.855255	0.858844	0.81755	0.901373	0.826865	0.873807	0.819228	0.904387	0.91257	1.07675	0.991178	0.951311	0.911799	0.964833	0.870011	0.885571	0.93511	0.816243	0.795502	0.803786	0.833095	0.722303	0.710958	0.695696	0.750215	0.686304	0.733016	0.712466	0.677682	0.694091
0.291514	0.361151	0.464581	0.570344	0.544376	0.653875	0.694845	0.725856	0.797025	0.819604	0.812482	0.881639	0.914147	0.930251	0.936752	0.883205	0.841757	0.788801	0.724738	0.683039	0.691742	0.744332	0.69689	0.72778	0.719798	0.741132	0.735779	0.806599	0.817568	0.870639	0.923802	0.959711	0.97527	1.06538	1.09719		1.34462	1.44469		1.69246	1.72666	1.79765	1.91988	2.03757	2.08293	2.08705	2.08868	2.09755	2.05358	2.09803
0.252636	0.349115	0.23847	0.222742	0.216075	0.175409	0.141199	0.181237	0.144017	0.120154	0.16009	0.156721	0.191247	0.248695	0.208345	0.202644	0.202298	0.257018	0.25274	0.28786		0.375031	0.377026	0.374853	0.407667	0.444005	0.516401	0.422562	0.476999				0.586497	0.524086	0.477978	0.527785	0.477586	0.474145	0.458399	0.354772	0.344326	0.285908	0.245835	0.219181	0.214345	0.212162	0.194861	0.213064	0.217197	0.239275
0.382141	0.4782	0.655937	0.731906	0.849027	0.733204	0.992632	0.975029	1.01664	1.14305	1.15696	1.10422	1.2819	1.11956	1.14425	1.04683				1.12873	0.968166	0.95532	0.965794	0.935708	0.958765	0.875853	0.942063	0.859771	0.838149	0.81916	0.823536		0.766375	0.788116	0.783426	0.743047	0.686491	0.677682	0.662946	0.670705	0.660773	0.623478	0.590652	0.587648	0.588815	0.646516	0.573207	0.549556	0.540346	0.507005
0.961659	1.03102	1.09103	1.11687	1.11088	1.2072	1.40938	1.41671	1.55109	1.40704	1.49203	1.57148	1.37008	1.35561	1.44083	1.24349		1.09947	1.07053		1.20943	1.22805	1.2358	1.21886	1.14706	1.3152	1.25326	1.30088	1.24778	1.34411	1.34822	1.33913	1.3276	1.06786	1.08178	0.917648	0.926326	0.949478	0.99091	1.04772	1.26164	1.29556	1.27019	1.21642	1.31006	1.34572	1.4955	1.49953	1.66393	1.67616
0.432676	0.407197	0.415036	0.475151	0.532561	0.696481	0.930682	1.60054	0.71101			0.756889		0.97956	0.974269	0.954157	0.976727	0.961095	0.858438	0.725137	0.723405	0.681482	0.618394	0.557392	0.545833	0.501162	0.544821	0.534471	0.535251	0.546316	0.592249	0.604254	0.603505	0.635461	0.679285	0.734726	0.747304	0.785974	0.824869	0.843614	0.940543	1.02376	0.986225	0.917888	0.951227	0.932148	0.924868	1.00762	1.04844	1.09717
	0.223716	0.161439	0.188214	0.172971	0.162233	0.143245					0.33533	0.0587461	0.106202	0.0181244	0.0616265	0.0779557	0.0446958	0.0272973	0.143175	0.088177	0.110244	0.129199	0.114648	0.107418	0.167341	0.102303	0.142046	0.167945	0.172443	0.186751	0.172256	0.210025	0.20291	0.191764	0.18713	0.196913	0.190502	0.128794	0.118636	0.193144	0.225403	0.226102	0.181869	0.175473	0.195397	0.230821	0.173698	0.19102	0.194127
0.701197	0.717969	0.683065	0.723401	0.752579	0.893111	0.88205				0.76573	0.805345	0.761948	0.786882	0.803076	0.852853	0.904055	0.890741	0.970705	0.986775	0.985211	1.08623	1.04346	1.05113	1.0556	1.10815	1.09118	1.13652	1.14201	1.1602	1.13302	1.14327	1.15671	1.17894	1.22252	1.18506	1.17949	1.15227	1.13594	1.11565	1.04816	0.966863	0.868071	0.7963	0.783047	0.773846	0.735844	0.703677	0.702345	0.674488
0.278133	0.455705	0.648662		0.718013	0.909795	1.10277	1.23522	1.3068	1.26231	1.33521	1.42034	1.43151	1.45474	1.45038	1.49392	1.46363	1.35308	1.47069	1.40455	1.3938	1.4136	1.50367	1.55437	1.58025	1.60996	1.59117	1.56139	1.47572	1.46179	1.44013	1.5616	1.58744	1.60633	1.63898	1.56946	1.51024	1.4988	1.51054	1.51059	1.51444	1.45938	1.35863	1.40033	1.3463	1.38658	1.36	1.29025	1.29072	1.32407
0.697901	0.571529	0.588444	0.815001	0.689876	0.621958	0.665094	0.740725	0.616669	0.793006	0.84773	1.12689	1.68753	1.06408	0.70236	0.545879	0.594203	0.32277	0.668731	0.729756	0.886959	0.855064	0.832917	0.842315	0.776789	0.720463	0.63143	0.631035	0.576053	0.629766	0.621229	0.626464	0.687009	0.681532	0.633495	0.596553	0.564974	0.63358	0.65568	0.64257	0.655135	0.612159	0.702821	0.688461	0.703261	0.795153	0.78406	0.786449	0.833922	0.846088
0.458489	0.394956	0.379639	0.394359	0.455397	0.464227	0.494484	0.487555	0.455502	0.47686	0.493648	0.490237	0.509434	0.540483	0.515773	0.529088	0.479344	0.470769	0.452929	0.507983	0.521824	0.515963	0.479906	0.485428	0.500261	0.46723	0.494674	0.466553	0.532704	0.529373	0.55255	0.57268	0.632598	0.600608	0.612336	0.603807	0.595945	0.661011	0.616855	0.650375	0.693621	0.662454	0.626394	0.635605	0.635695	0.710826	0.691711	0.722743	0.743254	0.773813
0.720305	0.693173	0.653089	0.671864	0.71003	0.536082	0.603801	0.595872	0.63984	0.69183	0.697374	0.762096	0.808781	0.842756	0.86646	0.888941	0.911486	1.02066	0.937258	1.09367	1.05403	1.10775	1.1671	1.32765	1.37838	1.54182	1.61362	1.54665	1.63358	1.72676	1.75927	1.73283	1.87773	1.91719	1.97774	2.00605	2.39282	2.30774	2.09123	1.7089	1.50865	1.84428	1.43303	1.36666	1.49548		1.39369	1.32524	1.38566	1.29046
0.654036	0.65832	0.648142	0.645966	0.638203	0.589701	0.609279	0.605789	0.610952	0.585868	0.592574	0.525664	0.52336	0.564556	0.621483	0.660874	0.690032	0.713301	0.731087	0.813553	0.788222	0.847041	0.875035	0.931496	0.996397	1.06875	1.1085	1.10001	1.10145	1.11141	1.06071	1.09091	1.07302	0.952409	0.931862	0.815406	0.834857	0.795056	0.657881	0.701182	0.73115	0.706823		0.999609	1.33734	1.85384	0.814486	0.593115	0.592861	0.642845
0.56481	0.553772	0.527167	0.455378	0.498602	0.47922	0.478401	0.446436	0.432713	0.411565	0.423604	0.444638	0.449828	0.509607	0.580703	0.576623	0.557415	0.564374	0.554098	0.537537	0.606046	0.549437	0.648683	0.605371	0.470665	0.520174	0.505547	0.36436	0.332319	0.282056	0.251423	0.28966	0.402006	0.401517		0.517739	0.553468	0.575222	0.871661	0.671608	0.661474	0.601409	0.527991	0.551016	0.522305	0.47579	0.426118	0.452662	0.449197	0.456014
0.705966	0.936063	0.964905	1.07075	1.00561	1.11383	1.11968	1.12274	1.15106	1.16622	1.02512	0.93139	0.892275	0.835456	0.84884	0.853564	0.949333	1.00079	0.984203	1.01852	1.07839	1.12602	1.1703	1.10001	1.16017	1.11243	1.29083	2.22773	0.718507	0.782925	0.728276			1.05625		0.710205	0.631149	0.76032		0.698285	0.724779	0.735187	0.815293	0.809067	0.804201	0.852426	0.924519	0.887053	0.824007	0.796781
0.376648	0.36095	0.362793	0.387053	0.379572	0.459157	0.462445	0.479478	0.427212	0.41426	0.356616	0.338396	0.222097	0.183288	0.153346	0.163475	0.149324	0.210918	0.174424	0.257726		0.274444	0.259653	0.270545	0.241427	0.22329	0.246296	0.224477	0.190701	0.220362	0.256841	0.258824	0.289952	0.364784	0.403264	0.395843	0.438284	0.497397	0.608121	0.65664	0.709346	0.691776	0.721461	0.650754	0.578527	0.507741	0.464318	0.431854	0.375728	0.349366
1.13467	1.10641	1.15875	1.2596	1.27955	1.18487	1.34776	1.47004	1.53647	1.4573	1.74108	1.72351	1.61829	1.73313	1.63865	1.73107		1.5687	1.68077	1.58278	1.7415	1.57983	1.47775	1.39258	1.3736	1.2474	1.34528	1.23435	1.34306	1.34848	1.28155	1.2998	1.24875	1.1283	1.1397	1.21399	1.25876	1.2768	1.29785	1.19832	1.30937	1.30771	1.15777	1.08644		0.94539	0.958244	0.973321	0.972541	1.03858
0.573601	0.331279	0.37509	0.267375	0.271893	0.364771	0.370272	0.430805	0.479535	0.545226	0.641519	0.681253		0.837117		1.02157	1.01262	0.983013	1.15864			1.08593	1.10122	0.984011	1.05119	1.03817	1.10322	1.01775	1.10917	1.1312	1.13087	1.12978	1.26988	1.37599	1.41436	1.69198	1.35794	1.48792	1.57338	1.36292	1.28932	1.3458	1.31039	1.36385	1.38962	1.34583	1.28468	1.11345	0.964917	0.829367
0.110125	0.18427	0.168894	0.202209	0.222811	0.262149	0.304747	0.342968		0.385719	0.281694		0.442954	0.376038	0.345049	0.327794	0.290514	0.274899		0.17475	0.242703	0.155877	0.166781	0.167584	0.145273	0.214563	0.188949	0.22945	0.235458	0.227203	0.271786	0.248804	0.345097	0.329558	0.454771	0.427476	0.425435	0.396562	0.504076	0.471923	0.500618	0.625674	0.612945	0.515293	0.46752	0.452905	0.422581	0.376219	0.319448	0.348456
0.589015	0.667889	0.65857	0.968701	0.808654	0.420318						0.32534	0.4478	0.506464	0.358971	0.493807	0.40091	0.491071	0.48856	0.535324	0.560557	0.514439	0.546767	0.562537	0.543218	0.629382	0.573613	0.565484	0.628205	0.628474	0.734889	0.740747	0.843781	0.94843	1.03894	1.0831	0.986021	0.984939	0.859294	0.825175	0.81775	0.883992	0.90976	0.876219	0.830379	0.769363	0.749131	0.739577	0.740026	0.754531
0.673042	0.726533	0.913886						0.525461	0.628365	0.626514	0.507905	0.418291	0.416324	0.431903	0.377724	0.371329	0.501952	0.475094	0.219249	0.216311	0.247544	0.244214	0.211271	0.245241	0.228073	0.155289	0.125042	0.15142	0.16958	0.264488	0.17543	0.241825	0.197641	0.192827	0.281803	0.271452	0.243176	0.236752	0.272393	0.357524	0.38261	0.374097	0.4176	0.452646	0.518419	0.544036	0.508767	0.476135	0.481272
0.262563	0.270095	0.275912	0.294039	0.319286	0.416738	0.38056	0.409776	0.407684	0.430654	0.42837	0.461425	0.519449	0.525156	0.517487	0.577333	0.628442	0.610977	0.58092	0.603682	0.585973	0.533508	0.484607	0.446339	0.454994	0.424089	0.419075	0.493377	0.519358	0.534229	0.64005	0.684128	0.66912	0.754459	0.75052	0.815908	0.71507	0.684058	0.63129	0.60644	0.551607	0.480918	0.437951	0.450872	0.407487	0.366254	0.310996	0.280244	0.253868	0.232251
0.431021	0.466281	0.491504	0.573754	0.552802	0.60598	0.618367	0.664336	0.659476	0.792376	0.739907	0.673702	0.645783	0.621094	0.626333	0.651295	0.71507	0.673227	0.659746	0.736244	0.756023	0.749578	0.752771	0.734727	0.750617	0.694538	0.778594	0.79457	0.776425	0.836745	0.865065	0.872651	1.00114	0.966388	0.960811	0.939988	0.901719	0.894903	0.887509	0.833432	0.824676	0.762606	0.82424	0.788819	0.797133	0.782339	0.824879	0.864551	0.81853	0.842894
0.156953	0.194214	0.229761	0.275109	0.275713	0.285484	0.283217	0.273556	0.285726	0.251119	0.274599	0.280001	0.26069	0.117445	0.177854	0.142848	0.245375	0.157971	0.205653	0.376315	0.442076	0.490749	0.30046		0.339935	0.326135				0.392185	0.567412	0.611555	0.588069	0.664798	0.727813	0.595008	0.70248	1.09628	0.996999	0.771852	0.696816	0.301547	0.225246	0.193706	0.198746	0.18535	0.194837	0.189859	0.189468	0.171736
0.435834	0.478548	0.525714	0.56792	0.596408	0.648371	0.569645	0.585222	0.591576	0.574555	0.583866	0.578553	0.618261	0.635556	0.621921	0.689153							0.900021	0.841966	0.847028	0.866912	0.764426	0.768344	0.867733	0.794155	0.763915	0.739411	0.745347	0.692133	0.767905	0.707127	0.738224	0.699275	0.690387	0.720073	0.786315	0.87144	1.10411	1.58424	0.698033	0.895798	0.881892	0.966369	0.828912	0.542863
0.521221	0.702138	0.813095	1.00984	1.10782	1.16676	1.21594	1.2006	1.04374	1.00927	1.06072	1.07363	1.0533	1.04969	1.0251							0.788294	0.753531	0.721216	0.719904	0.832345	0.81351	0.868382	0.853407	0.952858	0.977314	0.966909	0.996653	1.0184	0.957043	0.892262	0.932547	0.851656	0.789255	0.812772	0.799207	0.705268	0.643707	0.641076	0.581354	0.606592	0.623735	0.642773	0.696553	0.676227
1.64964	1.68339	1.74315	1.61865	1.6738	1.76958	2.1337	2.17103	2.37896	2.09106	1.6925	1.43627	1.359	1.25505	1.17874		1.2917	1.26277	1.14551	1.22662	1.15672	1.19704	1.32084	1.30945	1.31371	1.26979	1.33639	1.14441	1.29852	1.21204	1.18207	1.08136	1.12664	1.06336	1.02174	1.03806	1.07742	1.15075						1.29669	1.14636	1.06923	1.2392	1.47867	1.81789	1.5845
0.317011	0.321281	0.311593	0.338188	0.324924	0.37334	0.370723	0.37557	0.358311	0.332406	0.290289	0.287453	0.308515	0.360415	0.373335					0.487327		0.556097	0.448653	0.424539	0.433299	0.410915	0.439363	0.465828	0.442997	0.444427	0.448237	0.465179	0.392429	0.425323	0.4057	0.511983	0.486358	0.49462	0.586995	0.708758	0.742204	0.8095	0.785521	0.834222	0.8282	0.75943	0.689627	0.683649	0.654825	0.566219
0.22615	0.300841	0.407961	0.504143	0.541693	0.512395	0.472158	0.395332	0.464639	0.481556	0.546392	0.548324	0.560358	0.53748		0.570203					0.487495	0.422644	0.449133	0.449363	0.531296	0.624042	0.675785	0.678838	0.594785	0.67707	0.686725	0.710432	0.700284	0.778692	0.834223	0.805005	0.783903	0.759729	0.735121	0.647784	0.700737	0.666184	0.691688	0.676993	0.638156	0.614182	0.624657	0.576922	0.543306	0.525458
0.582565	0.528016	0.504204	0.532953	0.476122	0.470114	0.411729	0.442824	0.423168	0.375891	0.440702	0.415606	0.417797	0.406027				0.506497		0.634739	0.648496	0.641949	0.684009	0.695017	0.761945	0.759956		0.768398	0.770483	0.747301	0.64743	0.684626	0.660491	0.639865	0.61022	0.656318	0.704278	0.770661	0.832053	0.899772	0.95556	0.962507	0.971902	0.987737	0.886957	0.874688	0.857487	0.837643	0.927816	0.982459
0.316118	0.277581	0.310728	0.275103	0.224335	0.198061	0.204841	0.229701	0.274004	0.302693	0.359035	0.364384	0.544388	0.436692				0.545769			0.519571	0.451825	0.4577	0.383845	0.407687	0.42349	0.404649	0.40267	0.445949	0.60911	0.860922	0.97557	0.946987	0.944804	0.850467	0.825436	0.942889	0.841973	0.818955	0.786749	0.785651	0.759567	0.790389	0.727299	0.649427	0.426403	0.448547	0.426668	0.378555	0.428347
1.61579	1.77725	2.3281	2.39554	1.55335	2.52563	2.35946	3.75929							1.54381	1.54812	1.67746	1.65839	1.78387	2.1589	1.94967	2.04968	2.11703	2.13737	1.98543	1.9727	2.14818	2.20671	2.13324	2.0501	2.18593	2.17378	2.20917	1.86036	2.75911	2.51864	2.88014	2.7383	3.06462	2.80984	3.29204	2.79122	3.10055	2.83328	3.02405	3.15217	2.64624	2.80369	2.34797	2.5445
0.451594	0.570162	0.314805	0.301405	0.306503	0.294417	0.383629		0.503621	0.592501	0.570271	0.569782	0.527286			0.594798		0.74222	0.596773	0.713263	0.726256	0.627753	0.606625	0.628625	0.675601	0.69029	0.685806	0.746523	0.825271	0.812951	0.776605	0.798704	0.840793	0.910797	1.11655	1.97096	0.778454	0.673216	0.565107	0.39683	0.533157	0.649525		0.829552	0.800745	0.682784	0.605177	0.60047	0.690594	0.528576
1.36443	0.558823	0.552867	1.43721	1.84032	0.539186	0.425286							0.790917	0.733135	0.786528	0.802869	0.805569	0.852948	0.984414	0.90532	0.943604	0.931022	0.956918	0.866029	0.870084	0.91724	0.881091	0.858768	0.944032	0.860826	0.942146	0.962005	0.928798	0.939419	1.0003	0.92894	0.948265	0.956185	0.969369	1.07706	0.932044	0.97267	1.01329	0.832402	0.963662	1.02022	0.868732	0.93819	0.952158
0.204235	0.225316	0.316982	0.394037		0.686717	0.842213	1.74745	1.35523	1.11166		1.23993	1.36502	1.32477	0.727293	0.955709					1.49172	1.54087	1.56597	1.67712	1.47954	1.50696	1.27752	1.33888	1.73697	1.6936	1.59317	1.48525	1.56503	1.81855	2.19204	1.88231	1.70204	1.50266	1.58815	2.12249	1.76532	1.86149	1.61178	2.03657	1.722	1.84736	1.57836	1.6756	1.63083	1.73045
0.533186	0.365958	0.323304	0.194836	0.298847			0.327987		0.236358	0.486513	0.526439	0.54195	0.562769	0.559327	0.523343	0.555256	0.469035	0.485808	0.538241	0.539985	0.527508	0.539501	0.515459	0.568741	0.64978	0.669128	0.697502	0.695255	0.703559	0.688488	0.691432	0.642272	0.780599	0.796345	0.74036	0.7399	0.739171	0.770782	0.675496	0.718737	0.698641	0.72368	0.722787	0.655252	0.681124	0.733043	0.715393	0.704022	0.654619
0.0964233	0.0642724	0.0932367	0.140442	0.0917209	0.0892522	0.124955	0.172011	0.188863	0.179921	0.189215	0.177936	0.195122	0.205943	0.210476	0.206939	0.206225	0.237827	0.267642	0.2613	0.278202	0.241022	0.238574	0.231538	0.223792	0.216214	0.282667	0.370627	0.329641	0.318572	0.26898	0.271262	0.336683	0.277263	0.267811	0.258059	0.243647	0.257148	0.216995	0.207741	0.242583	0.261967	0.245531	0.241434	0.217437	0.218351	0.188064	0.183452	0.167919	0.207526
0.665232	0.612916	0.558566	0.596781	0.629949	0.578459	0.538834	0.595356	0.593084	0.622003	0.636107	0.691045	0.712562	0.807178	0.842246	0.86368	0.860749	0.841747	0.807233	0.911925	0.87413	0.769306	0.777517	0.68876	0.628438	0.640966	0.591695	0.560303	0.577271	0.592142	0.62645	0.663304	0.609365	0.689287	0.657867	0.705821	0.726057	0.746781	0.748966	0.731522	0.772728	0.734023	0.700367	0.754389	0.734018	0.757186	0.749211	0.849864	0.861335	0.912062
0.853658	0.985172	1.07736	1.12775	1.1181	1.09758	1.1048	0.999498	0.979783	0.968073	0.836055	0.845863	0.871392	0.883689	0.984869	0.994894	1.10054	1.02856	1.12773	1.11837	1.0631	1.12333	1.16349	1.21537	1.14279	1.1395	1.16949	1.07299	1.08214	1.0424	1.06829	1.01724	1.01026	0.986989	1.02999	0.978516	0.958005	0.918165	0.930905	0.926844	0.88315	0.866621	0.83987		0.846329		0.757706	0.837597	0.834909	0.740475
0.285204	0.202737	0.161065	0.143816	0.05544	0.400815	0.286879		0.117429	0.582929	0.465188	0.144459	0.301182	0.207823	0.264852	0.215661	0.182304	0.145189	0.135194	0.211544	0.182195	0.231057	0.254445	0.225643	0.185397	0.177177	0.218781	0.209187	0.205829	0.193889	0.131417	0.0737731										1.30305	0.31619	0.244955	0.294077	0.300409	0.352913	0.319202	0.370734	0.366603
0.949527	0.929479	0.981472	0.97911	1.04579	0.985967	1.02731	0.890449	0.990035	0.885386	0.911089	0.937843	0.832691	0.795379	0.86086	0.89481	0.768312	0.818458			0.951002	0.920549	0.965185	0.827178	0.792046	0.792915	0.841692	0.91173	0.908605	0.909332	0.98273	0.98779	1.05611	1.03828	1.06819	1.14034	1.08508	1.02146	1.05039	1.2062	1.18773			1.24816	1.32344		1.40913	1.30731	1.2946	1.21677
0.635553	0.592112	0.537722	0.535892	0.609103	0.633839	0.650037	0.741083	0.751167	0.775608	0.895393	0.844703	0.721752	0.86437	0.893151	0.958332	0.865398	0.873822		1.18159			0.835405	0.844187		0.759644	0.918537	0.881731	0.983868	1.36738	1.24176	1.4548	1.51224	1.65573	1.92086	1.70368	1.97746	1.82416	1.68609	1.31815	1.17481	1.04664	0.973208	0.897269	0.854434	0.806464	0.756607	0.84503	0.879397	0.820547
0.121483	0.155052	0.152451	0.222131	0.317518	0.318217	0.333152	0.301327	0.328855	0.308129	0.301199	0.345143	0.319138	0.342064			0.431214			0.332142		0.296478	0.294638	0.257554	0.189601	0.253605	0.213625	0.208206	0.200016	0.178805	0.21075	0.229816	0.221291	0.227833	0.210427	0.140348	0.185691	0.138193	0.164084	0.126105	0.139324	0.16688	0.152728	0.0865054	0.126503	0.0823555	0.11665	0.112534	0.125571	0.151399
0.353687	0.343646	0.31566	0.304574	0.420644	0.501218	0.575795	0.497455	0.417017	0.395956	0.413666	0.404541	0.447911	0.462022		0.514065		0.582694				0.697792	0.62646	0.668773	0.596911	0.628211	0.598875	0.613992	0.661119	0.668962	0.706063	0.673538	0.699803	0.749728	0.832289	0.91012	0.981633	1.06004	1.13391	1.10394	1.08558	1.10321	1.06028	1.07369	1.13036	1.13747	1.12932	1.13379	1.1361	1.11714
0.538144	0.521504	0.496365	0.510471	0.509784	0.558979	0.572804	0.63489	0.61917	0.660043	0.772158	0.674939	0.687544	0.712134				0.598843	0.65523			0.679515	0.571069	0.601337	0.632983	0.657439	0.650597	0.600945	0.5779	0.565289	0.49524	0.496009	0.470128	0.488028	0.465752	0.484552	0.503311	0.479101	0.423651	0.430112	0.410486	0.404904	0.402606	0.410798	0.387252	0.431384	0.432369	0.505975	0.504445	0.530083
0.733959	0.861367	0.845553	0.864124	0.870834	0.841791	0.848502	0.794058	0.794088	0.800876	0.868641	0.884936	0.786644	0.716284		0.701998		0.647176				0.591291	0.651766	0.647363	0.740428	0.771431	1.06514	1.24767	1.36574	1.34083	1.57886	1.62123	1.51396	1.41341	1.32212	1.11237	1.08161	0.965123	0.909592	0.72559	0.642109	0.506973	0.444646	0.421188	0.35904	0.332847	0.258744	0.257747	0.234392	0.27536
0.302007	0.361946	0.583565	0.430278	0.594854	0.642543	0.941718	0.876742	1.14054	1.61677	1.44085		3.21353		2.02816	1.14167	0.66988	0.873632	1.08383	1.75318	1.38009	1.14954	1.01031	1.0311	0.997186	0.988299	0.967234	0.996069	1.31132	1.25603	1.07422	0.952084	1.13342	1.10718	1.21692	1.8257	1.32956	1.44359	1.1478	1.37789	1.27202	1.17382	1.27004	0.887173	0.999906	1.0058	0.938689	0.754782	1.05752	3.26614
0.514546	0.477017	0.516787	0.552841	0.545098	0.647093	0.670133	0.719466	0.748163		0.812652	0.830437	0.809799		0.854302	0.982581		1.05314		0.973367	1.00508	0.934294	0.909512	0.866616	0.828242	0.818595	0.830637	0.76663	0.804021	0.789278	0.734437	0.788472	0.815339	0.811529	0.898655	0.901141	0.937766	0.972286	1.10327	1.17419	1.25139	1.26129	1.30073	1.30639	1.32083	1.30633	1.30734	1.32298	1.28717	1.08445
0.718789	0.714017	0.738708	0.795409	0.877832	0.83447	0.995062	1.09554								1.17704	1.2752	1.14677	1.12479	1.03993	0.923491	0.878312	0.858042	0.865108	0.942401	1.03449	1.11758	1.22475	1.26898	1.32076	1.26393	1.28632	1.33052	1.33031	1.48005	1.43313	1.42202	1.40712	1.3218	1.12979	1.07533	0.997184	0.827992	0.749768	0.697025	0.662409	0.701809	0.726185	0.734246	0.804596
3.26885	0.88197	0.873345	0.713277	1.02696				1.39042				1.11915	1.03844	0.936997	0.886421	0.84228	0.732719	0.644031	0.934463	0.921111	0.910405	0.766051	0.927297	0.882827	0.981368	0.983731	1.03731	1.06307	1.05231	1.14761	1.20851	1.30142	1.28768	1.31461	1.31078	1.34859	1.44967	1.60307	1.67069	1.68197	1.56375	1.38877	1.27947	1.13207	0.938376	0.892638	0.89792	0.926869	0.86445
0.793568	0.819011	0.794239	0.809765		1.09888	1.59619	1.24982	1.19904	1.23818	1.00903	0.944544	1.01046	1.11893	1.15427	1.1472	1.16135	1.26701		1.34531	1.50357	1.30756	1.15908	1.21067	1.12696	1.30263	1.04607	1.15617	1.0909	1.1609	1.22715	1.22621	1.35132	1.41981	1.41026	1.40825	1.65551	1.75697	1.80151	1.81337	1.84979	1.88286	1.85131	1.81678	1.7948	1.62232	1.43225	1.18025	1.14469	0.953893
0.418652	0.399378	0.379455	0.399422	0.410826	0.464565	0.530238	0.60259	0.733313	0.781001	0.850241	0.900207	0.929415	0.851322	0.917512	0.859619	0.879544	0.890709	0.939897	0.906646	0.908979	0.86793	0.872483	0.928643	0.914582	0.902287	1.06747	0.817663	0.867203	0.851509	0.850905	0.837701	0.931603	0.950523	1.00711	0.963183	0.989595	1.00626	0.921522	0.949795	0.829826	0.864996	0.813414	0.807219	0.853642	0.832765	0.796106	0.814028	0.803298	0.752239
0.613674	0.605682	0.675351	0.763981	0.770893	0.743363	0.682324	0.72593	0.649558	0.579493	0.578402	0.648445	0.594868	0.570918	0.633296	0.734916	0.763696	0.83224	0.818303	0.785689	0.687046	0.704542	0.777485	0.775034	0.789503	0.877332	0.837252	0.790183	0.790061	0.795647	0.785091	0.784471	0.803162	0.805292	0.772615	0.742765	0.742516	0.732265	0.748717	0.78424	0.778237	0.760444	0.729412	0.720825	0.703774	0.705883	0.684581	0.67038	0.698378	0.666173
0.556856	0.580596	0.624985	0.714266	0.76713	0.77575	0.782614	0.769971	0.770806	0.796617	0.765044	0.784195	0.810236	0.791752	0.788837	0.835799	0.835303	0.836623	0.824271	0.819928	0.836326	0.884162	0.885136	0.861682	0.797208	0.785674	0.793956	0.788034	0.797805	0.863856	0.905797	0.883981	0.855505	0.922706	0.957466	0.923887	0.90819	0.891697	0.844955	0.853499	0.869497	0.871595	0.885832	0.873645	0.82497	0.863199	0.845756	0.872317	0.843764	0.856572
1.02015	1.15088	1.06613	1.15772	1.11	1.32437	1.3801	1.42753	1.48318	1.44589	1.5837	1.64558	1.72325	1.74688	1.75047	1.68092	1.58321	1.48727	1.53508	1.50755	1.31866	1.40833	1.415	1.41472	1.44658	1.44485	1.42773	1.39918	1.36366	1.36763	1.29901	1.19947	1.17505	1.17957	1.07452	1.00643	0.941037	0.98655	0.978153	1.05922	1.09518	1.12232	1.11463	1.06191	1.00059	0.947518	0.922008	0.923807	0.916697	0.915716
0.924701	0.968943	0.915582	0.904907	0.821156	0.860077	0.913303	0.924819	0.924881	0.776751	0.753164	0.753007	0.784916	0.791068	0.814101	0.870494	0.872947	0.885324	0.897438	0.916531	0.85167	0.835018	0.797299	0.787532	0.819178	0.851029	0.841226	0.846529	0.823269	0.769582	0.714038	0.710318	0.665047	0.652824	0.655349	0.678049	0.606971	0.720499		0.768184	0.676076		0.67844	0.778559	0.785721		0.96968	0.90343		1.52079
0.327352	0.379261	0.396643	0.493915	0.544459	0.526981	0.580737	0.546712	0.47921	0.536174	0.512743	0.736503	0.87479				0.700452		0.202416	0.168625	0.871144		0.885664		0.915104	0.814403	0.696835	0.628376	0.564514	0.581237	0.545778	0.545267	0.601463	0.561797	0.567341	0.553109	0.530778	0.527616	0.518262	0.550024	0.542917	0.45371	0.416033	0.39346	0.395611	0.373804	0.379355	0.400056	0.442642	0.485337
0.358988	0.436676	0.479479	0.546668	0.563375	0.533917	0.536529	0.496392	0.557292	0.520963	0.652587		0.710832	0.602968	0.597091	0.559182	0.523453		0.48389	0.396627	0.377574	0.40042	0.444408	0.480099	0.478399	0.525773	0.462591	0.465825	0.513066	0.479472	0.486983	0.47982	0.456184	0.531358	0.556707	0.597249	0.664477	0.649245	0.714929	0.764851	0.72232	0.719195	0.74143	0.659147	0.667799	0.671133
0.697056	0.712372	0.587422	0.747487	0.773459	1.57378	1.56429	1.69903	1.56578	1.66638	1.84101			1.68281				1.63703		1.62183	1.06807	1.01464	0.871798	0.933763	1.04085	1.0927	1.06567	0.902848	0.894074	0.902739	0.909829	0.894809	0.813027	0.766529	0.746805	0.721931	0.682845	0.681145	0.693087	0.673861	0.698934	0.722482	0.667086	0.69157	0.702379	0.70388	0.776203	0.814802	0.891954	0.88148
0.241929	0.289487	0.326568	0.349395	0.397935	0.362939	0.351832		0.428145	0.492127	0.536809	0.586352		0.603477		0.709763				1.04675	0.957379	0.917534	0.926763	1.02942	1.00412	0.991618	0.988835	0.985853	0.900447	1.08366	1.13113	1.05256	1.17131	1.28486	1.36147	1.38125	1.40792	1.37632	1.40918	1.28091	1.17374	1.16491	1.13835	1.03727	0.94722	0.867013	0.809413	0.883171	0.866206	0.976478
0.368376	0.466034	0.492913	0.522142	0.510584	0.564139	0.50969	0.500779	0.54706	0.643749	0.786527	0.946652	1.0733	1.1537	1.36159	1.32909	1.25613	1.32161	0.936494	0.913267	0.920503	0.826348	0.862157	0.821567	0.792558	0.789874	0.683123	0.762311	0.708286	0.744858	0.787503	0.798288	0.840043	0.862476	0.862064	0.826019	0.88761	0.825772	0.862673	0.775028	0.884244	0.985562	0.880778	0.828258	0.689156	0.64253	0.682475	0.702848	0.693821	0.667722
0.144346	0.285467	0.368334	0.377407	0.459024	0.481412	0.371007	0.331148	0.329265	0.201182	0.238965	0.255627	0.253941	0.291176	0.303605	0.271593	0.311033	0.325029	0.286841	0.363226	0.363551	0.373061	0.463025	0.426284	0.521032	0.515388	0.455214	0.49489	0.44461	0.453718	0.395349	0.430381	0.419042	0.422768	0.42121	0.328625	0.326668	0.323028	0.318745	0.393233	0.403793	0.470737	0.47917	0.458602	0.471168	0.500434	0.459417	0.543945	0.535011	0.549187
0.17026	0.153934	0.24744	0.343335	0.412863	0.504954	0.578271	0.539971	0.533618	0.519986	0.573486	0.560626	0.576095	0.572294	0.521829	0.49445	0.500911	0.461047	0.575963	0.528862	0.5112	0.485668	0.5087	0.439249	0.466914	0.468787	0.500078	0.499765	0.534742	0.563732	0.562781	0.558021	0.555166	0.523009	0.495071	0.474085	0.502897	0.489805	0.489888	0.494538	0.523401	0.61386	0.687733	0.684481	0.731401	0.713654	0.7313	0.805131	0.847387	0.781485
0.461255	0.481258	0.515168	0.498622	0.537506	0.551709	0.578079	0.60673	0.61927	0.613517	0.621398	0.640581	0.636012	0.649077	0.687171	0.710805	0.698708	0.745051	0.766999	0.777912	0.787542	0.782083	0.787671	0.854722	0.864295	0.88859	0.882656	0.894135	0.874955	0.906235	0.870067	0.792007	0.780792	0.782686	0.771787	0.75629	0.73258	0.735579	0.764699	0.791784	0.875958	0.962234	1.05729	1.28303	1.93477	0.755152	0.727929	0.725968	0.788576
1.84135	1.4873	1.12156	0.974408	1.0425	1.42365	2.49344	2.81856	3.31856	3.88906	3.74116	4.09931	3.10938	3.17492	3.66212	3.1561	2.68631	2.29955	2.00552	1.92499	1.01573	1.51738	1.80623	2.02267	2.20886	1.80892	0.974308	0.924385	1.2621	0.723736	0.694625	0.794708	1.30801	2.3953	3.16927	2.23725	2.07899	2.27041	2.13736	1.60594	1.57022	1.19525	1.13355	1.05233	1.14303	1.16972
0.127011	0.0800567	0.22841	0.272452	0.240288	0.447437	0.395892	0.442158	0.668509	0.875598	0.989162	1.14993	1.41797	1.92616	1.79962	2.01229	1.86415	2.3414	2.93502	2.19281	2.65948		0.859087	1.05453	0.551823	0.652518	0.543598	0.531663	0.68177	0.648975	0.63086	0.635762	0.731063	0.709031	0.595133	0.700372	0.767761	0.826994	0.760902	0.64284	0.577149	0.566691	0.606115	0.551736	0.535153	0.541623	0.553187	0.57157	0.570971	0.611043
0.332144	0.4412	0.510929	0.471335	0.480834	0.511983	0.473982	0.408654	0.390256	0.389266	0.336281	0.348786	0.332446	0.338302	0.336422	0.411549	0.377364	0.452605				0.415528	0.467649		0.496515	0.558962		0.477727	0.506518	0.445089	0.358828	0.491437	0.447755	0.498291	0.377127	0.36746	0.401784	0.455632	0.415032	0.343041	0.325485	0.355125	0.329744	0.374091	0.341691	0.36705	0.372976	0.459426	0.459365	0.523344
0.29674	0.275632	0.2591	0.289357	0.346709	0.336585	0.414061	0.451709	0.5285	0.621972	0.799188	0.957943	0.924326	1.08725		1.01704	0.921836		0.951507			0.945188	0.899799	0.94936	0.913782	0.981147	0.950594	0.966623	0.994634	1.08008		1.22051	1.16104	1.23188	1.29241	1.36898	1.35012	1.23694	1.07811	1.1219	1.13883	1.10195	1.08319	0.983303	0.912677	0.895795	0.776489	0.731706		0.657193
1.36378	1.31879	1.48632	1.3193	1.56553	1.66774	1.47567	1.60251	2.2305	1.89179	1.69717	1.46136	1.70892	1.40461										1.99771	1.66655	1.55256	1.35843	1.4369	2.07097	2.2107	1.91065	1.82	1.60895	1.80431	2.13695	2.31714	3.02437	2.51555	1.95134	3.00112	3.0737	2.43431	3.52599	1.97844	2.1168	2.40959	2.0023	2.19653	3.14639	2.69882
0.60284	0.602117	0.632707	0.656537	0.749101	0.730255	0.73703	0.773811	0.830514	0.868136	0.912836	0.959254	1.00405	1.03209		1.04847						1.28508		1.19972	1.30949	1.13754	1.20047	1.04002	1.06946	0.928832	0.960746	0.939238	0.838144	0.829086	0.811932	0.758335	0.651427	0.643278	0.639818	0.682981	0.755417	0.734585	0.756803	0.70018	0.796699	0.792375	0.708687	0.776227	0.751654	0.747525
0.813287	0.789478	0.772	0.793351	0.885918	0.935184	0.947001	1.0848	1.01961	1.11607	1.07009		1.10703	1.08534	1.08726	1.06851						0.924097	1.15184	1.1362	1.19832	1.29373		1.451		1.4087	1.45709	1.4844	1.49844	1.53047	1.35367	1.435	1.41466	1.32363	1.23068	1.1847	1.0875	1.05417	1.05691	1.05817	1.00494	0.985588	0.925784	0.910933	0.94723	0.947939
0.807854	0.775611	0.84361	0.859914	0.903957	0.962117	1.09157	1.07423	1.06609	1.08342		0.993354	0.933378	0.896106	0.921565	1.01342	0.981629	0.987332	1.11441			1.19181	1.12724		1.1453	1.25207		1.43376	1.68707	0.696292	0.84788	0.66833	0.172006	0.371989	0.609883	1.02297	1.12664	1.12239	0.772894	0.720485	0.85528	0.888195	0.850771	0.856454	0.739754	0.805094	0.837823	0.79099	0.772442	0.736913
1.14044	1.11456	0.989777	1.12747	1.25791	1.19241	1.22276	1.03822		1.12375	1.15725	1.26236		1.34555	1.37727		1.73897				1.83482	1.89544	1.73296	1.67397	1.54095	1.40947	1.67044	1.66543	1.5676	1.50657	1.55579	1.54814	1.5642	1.45114	1.56686	1.84275	1.72322	2.37965	2.3826	2.11281	2.18691	2.35359	2.28874	2.18878	2.85538	2.97448	2.20906	2.39092	3.43225	3.16895
1.73919	1.3557	1.75377	1.19848	0.889839	0.928067		0.915994		1.00407	0.946185	0.905599	0.895509	0.901162			0.949571				0.808527	0.802355	0.715602	0.703438	0.70268	0.687367	0.674709	0.634431	0.63832	0.63011	0.607455	0.604206	0.624033	0.669357	0.666661	0.698737	0.656173	0.652379	0.650074	0.676842	0.777409	0.792791	0.763234	0.72809	0.695126	0.637375	0.628275	0.600591	0.582907	0.563867
0.84338	0.961431	1.07699	1.13605	1.24772	1.17595	1.10784	1.11285	1.00138	1.06293	0.99318	0.968163	0.939872	0.916472	0.9561	0.932662	1.07494	1.07822	1.15359	1.20078	1.1998	1.25625	1.19214	1.24548	1.18952	1.23942	1.12017	1.19403	1.19249	1.23023	1.16233	1.21213	1.26294	1.37934	1.4111	1.37031	1.2995	1.19486	1.19558	1.12792	1.1526	1.11056	1.07254	1.08523	1.12647	1.06327	1.03795	1.00765	1.0452	1.06556
1.1126	1.01829	1.00192	0.939998	0.962188	1.01957	1.01917	0.934504	0.862876	0.934791	0.781245	0.900864	0.835352	0.859114	0.86792	0.896771	0.930555	0.986302	1.04869	0.996029	0.929901	0.922268	0.868332	0.824708	0.875933	0.9605	0.879137	0.808216	0.798971	0.82649	0.874505	0.875552	0.931498	0.964779	1.07443	1.31139	1.88935	1.40453	0.731293	0.770335	0.685639	0.602744	0.470463		0.845802		0.793519		0.78223	0.815334
0.651465	0.791237	0.815052	0.782565	0.818739	0.992533	0.929815	1.60478	0.672393	0.838148	0.603013	0.31367	0.484177	0.683159	0.851355	0.877711	0.77299	0.602544	0.499489	0.273657	0.303611	0.315067	0.41026	0.52177	0.609685	0.762946	0.678059	0.706521	0.866087	1.09099	1.10034	0.807159	0.995768	0.767854	0.952242	1.04387							1.20526	1.09959	0.952493	0.854902	0.686073	0.613852	0.576865	0.536732
2.01754	2.02792	2.12842	2.01254	2.08097	2.09553	2.01463	2.11318	2.00057	1.90112	2.4203	2.32061	2.45961	2.35613	2.61675	2.92277	3.11051	3.56349	3.6447	3.39216	3.11099	3.61953	3.64748	3.93308	3.31925			1.81151		1.96317	2.75988	2.09582	2.86327	3.11996	3.16889	2.31199	2.22195	1.70957	2.13002	2.07279	2.00791	1.60995	2.49867	1.89958	2.5636	2.47407	1.75629	2.14874	2.31846	2.61444
0.775753	0.735832	0.672715	0.624712	0.576382	0.607562	0.59332	0.677683	0.56361	0.633779	0.568678	0.655063	0.731764	0.784135	0.810445	0.706675	0.744731	0.860583	0.883616	0.989917	0.965018	0.929256	0.833031		0.769523	0.779086	0.736561	0.678827	0.704079	0.659316	0.662308	0.576094	0.59565	0.5331	0.566967	0.524077	0.564117	0.56136	0.657872	0.702122	0.696206	0.702553	0.627562	0.558769	0.551496	0.513432	0.553859	0.648212	0.622072	0.686387
0.697273	0.764279	0.786317	0.793759	0.842929	0.887922	0.925702	0.956509	0.978186	1.08099	1.08324	1.11997		1.1365							0.940003	0.862867	0.930872			0.953006	0.966391	0.999965	1.04234	1.12459	1.13641	1.18854	1.16997	1.13013	1.17802	1.23344	1.22547	1.06163	1.11934	1.08854	1.02871	0.95691	0.952652	0.649725	0.701247	0.770455	0.82985	0.878446	0.920408	0.966898
0.831091	0.859363	0.872466	1.02039	0.997773	1.03872	0.976826	1.16121	1.13516	1.10682	0.995686	1.07535	1.188	1.19949	1.24001	1.23674	1.19755	1.33106	1.48513	1.51666	1.43893	1.33676	1.2215	1.12022	1.04994	0.968437	0.951185	0.902351	0.915134	0.850314	0.879584	0.888551	0.803289	0.802439	0.866533	0.866284	0.855083	0.862652	0.903755	0.993683	0.956877	0.939737	0.914439	0.86173	0.83731	0.83143	0.839444	0.831316	0.825537	0.931001
1.21246	1.32385	1.36637	1.52975	1.46962	1.52471	1.53724	1.57481	1.55592	1.67748	1.61239	1.64097	1.69598	1.49136	1.65241	1.5026	1.36023	1.48285	1.50834	1.56004	1.53006	1.64848	1.77836	1.80085	1.86394	1.79936	1.95092	1.95179	2.08471	1.82489	1.68897			1.93733	1.77925	1.84095	1.80571	1.80772	1.54997	1.39207	1.34324	1.24791	1.2007	1.0211	1.13563	1.03927	0.987003	0.894494	0.850285	0.751579
0.774763	0.830296	0.883893	0.892521	0.827842	0.796473	0.860102	0.846724	0.893354	0.935744	0.799141			0.876958				0.704101		0.852888	0.7626	0.809286	0.744403	0.712049	0.741209		0.67966	0.635458	0.62869	0.606753	0.661679	0.705979	0.665472	0.712102	0.701258	0.746455	0.742764	0.657885	0.596678	0.684032	0.705051	0.665673	0.663888	0.652428	0.678414	0.74788	0.704846	0.686335	0.682529	0.683702
0.918952	0.87292	0.916271	0.919695	0.999823	1.00601	1.02701	0.97235	1.02258	1.0018	1.01231		0.987168	1.03458	0.964611	0.858224					0.967792	0.93767	0.887044	0.920138	1.11584	1.27534	1.23376	1.32462	1.31006	1.2786	1.23622	1.13989	1.14409	1.10739	1.06454	0.981841	0.918326	0.875194	0.845374	0.876679	0.916639	0.907722	0.887705	0.904053	0.934732	0.905033	0.890385	0.904384	0.923919	0.925201
0.366348	0.36536	0.351803	0.340765	0.349133	0.430447	0.41951	0.454657	0.506391	0.530746	0.607688	0.650528	0.669105	0.716406	0.74739	0.812028	0.767047	0.85742	0.924029	0.964653	0.950567	0.922105	1.02243	1.0073	0.955737	0.942927	0.888202	1.02567	0.966402	1.01125	1.16531	1.15443	1.12855	1.05483	0.908784	0.818001	0.766622	0.585495	0.59817	0.608367	0.710333	0.626604	0.766106	0.790094	0.752889	0.74617	0.728906	0.777652	0.815779	0.816713
0.268762	0.211222	0.208303	0.31221	0.378872	0.402742	0.441679	0.490715	0.53995	0.561529	0.48125	0.423543	0.35612	0.368974	0.260461	0.311228	0.415249	0.449572					0.533241	0.815592		0.51337	0.410899	0.292243		0.455148	0.570939	0.695041	0.874978	0.902788	0.803557	0.785284	0.722121	0.662644	0.683531	0.756673	0.814794	0.787887	0.769837	0.792486	0.780315	0.774744	0.728556	0.69066	0.615875	0.609898
0.532168	0.530601	0.528751	0.515251	0.538944	0.541945	0.503058	0.553138	0.546882	0.607559	0.78377	0.861763	0.821185	0.893258	0.941469		0.846741		0.776285	0.751742		0.632367	0.666096	0.670552	0.716274	0.76053	0.807804	0.743226	0.812357	0.817059	0.793793	0.799297	0.81101	0.862787	0.914133	0.91534	0.938269	1.0267	1.00041	0.985957	1.07149	1.05759	0.966481	0.861009	0.812946	0.763232	0.733915	0.705262	0.687433	0.749969
0.0981853	0.177396	0.328434	0.431362	0.53691	0.506097	0.543674	0.565291	0.736214	0.93371			1.31289	1.11953		1.37539	1.49936	1.44412	1.50894	1.709	1.97868	1.90585	1.48248	1.62205	1.18694	0.989686					0.792941	0.792405	0.842105	0.872244	0.901071	0.832215	0.78447	0.799828	0.833653	0.810548	0.734027	0.740836	0.749587	0.76514	0.738656	0.734142	0.724791	0.685764	0.721129	0.726795
0.814906	0.889523	0.854236	1.05727	1.11471	1.34449	1.30196	1.25119	1.09761	0.973188										1.0341	1.07769	1.21427	1.26284	1.3348	1.37347	1.42675	1.5365				1.55587	1.56748	1.47643	1.46579	1.46155	1.45931	1.4395	1.45212	1.3391	1.28641	1.23967	1.18873	1.10096	0.977364	0.887834	0.85715	0.84051	0.762357	0.759375	0.677658
0.248713	0.193489	0.246043	0.267187	0.636706	0.539316	0.620101	0.706012		0.836405			1.37102	1.17518	1.33297	1.56203	1.44266	1.50487	1.2829	1.27771	1.28259	1.61317		2.84331	0.896392	0.733621	0.637237	0.627382	0.599985	0.624603	0.505486	0.502511	0.44036	0.435544		0.389934						0.429605	0.489174	0.439598	0.49187	0.527822	0.586935
0.645891	0.69946	0.824383	0.859897	0.530604	0.548516	0.668684	0.885047	0.880248		0.86247	1.03159	0.997196	0.98346	0.975246	0.973301	0.979099	1.11466	1.00522		0.981331	1.10999	1.10569			1.28123	1.11105	1.26936	1.23791			1.23465		1.3284	1.3386	1.33085	1.28399	1.29965	1.30008	1.24012	1.30826	1.2571	1.22234	1.16913	1.18208	1.17472	1.18699		1.18816	1.19004
0.837015	0.939469	0.973178	1.05126	1.05083	1.0261	1.08144	1.00201	1.00853	0.966114	0.917716	0.870645	0.894012	0.893704	0.962571	1.00688	1.07596	1.18983	1.21649		1.3578	1.389	1.4611	1.41174	1.37905			1.20646	1.15656					0.752287	0.605644	1.0873					1.67899	1.7862	1.78792	1.66944	1.48594	1.343	1.27728	1.15369	1.0328	0.917945
0.51778	0.53851	0.616155	0.715769	0.714771	0.783482	0.837478	0.774621	0.803432	0.875629	0.879505	0.9378			1.28723							1.33783	1.36244	1.20991	1.58162	1.31661	1.45953	1.42432	1.3636	1.30723	1.13465	1.3474	1.2817	1.26518	1.38043	1.43622	1.47364	1.58726	1.32618				1.11351	0.852063	1.08176	1.06281	1.0637	1.1085	1.08644	1.1181
0.896336	0.91442	0.925167	0.979304	0.920256	0.993654	0.977278	0.984558	0.997629	0.987385	0.984076	1.01489			1.06744	1.06104		0.803976	0.890464		0.72009	0.686428	0.721382	0.747972	0.82964	1.03635	1.34464	2.07691	0.545578	0.521324	0.599785	0.657098		0.423049	0.525197	0.641112	0.897604	0.924482	0.969557	0.933193	0.798138	0.778803	0.929983	1.02952	1.17424	1.1169	1.20233		1.27322	1.32561
0.722922	0.748576	0.844262	1.0157	1.07097	1.07758	1.05172	1.17006	1.18505	1.25927	1.22741				1.25879		0.934496	0.818277	0.804107									1.34129	1.29902	1.2551	1.19031	1.27887	1.19922	1.24123	1.28125	1.30157	1.24025	1.3476	1.3172	1.31163	1.29658	1.27618	1.21749	1.13071	1.135	1.07318	1.10204	1.17444	1.27574	1.27219
0.625619	0.435543	0.380981	0.334229	0.335275	0.3465	0.44693	0.506073	0.503976	0.571741	0.580881	0.58411	0.602017	0.584521	0.613718	0.583962	0.584486	0.602879	0.664216	0.649102	0.706498	0.638041	0.659688	0.655904	0.74574	0.742305	0.75919	0.777288	0.849154	0.833376	0.856035	0.882263	0.958293	0.934368	0.867483	0.926987	0.912951	0.908945	0.80162	0.720468	0.707551	0.651379	0.580326	0.546685	0.432185	0.381656	0.375071	0.295434	0.277888	0.266727
0.712778	0.661679	0.687533	0.673688	0.764298	0.826854	0.92243	0.941239	0.997133	1.0066	1.03333	1.18559	1.42495	1.75859	0.916583	0.862115	0.890927	0.791927	0.974325	1.09828	1.12059	1.26033	1.46919	1.57005	1.6442	1.67867	1.64857	1.58547	1.40776	1.3075	1.21763	1.18312	1.24034	1.24404	1.17589				1.16209	1.23313	1.24657	1.26528	1.32404	1.34312	1.34836	1.3752	1.39133	1.40217		1.43795
1.04806	0.986203	0.921033	0.80787	0.784562	0.778317	0.799216	0.862734	0.921187	0.968746	0.934502	0.976631	1.0322	1.00216	1.00612	1.10621	1.07186	1.02128	0.996237	0.990279	0.88943	1.07248	1.12335	1.17449	1.25186	1.19376	1.21156	0.993395	0.961067		0.960807	0.911814	0.881407	0.973541	0.904352		0.852862	0.883687	0.884354	0.867635	0.867456	0.870422	0.842516	0.815162	0.774075	0.725058	0.703839	0.684847	0.754828	0.727703
1.92409	1.76254	1.51881	1.27445	1.04346	1.13846	1.30055	1.26051	1.3356	1.35	1.22999	1.19393	1.34808	1.49135	1.21752	1.31633	1.39806	1.13634				1.26408		1.19721	0.982262	1.16759	1.10768	1.09626	1.18401	1.05222	1.09558	1.11326	1.37223	1.21979	1.26545	1.2797	1.18466	1.35847	1.5204	1.47814	1.6088	1.58408	1.49101	1.48302	1.57714	1.54959	1.48895	1.50679	1.6075	1.53317
0.486577	0.52817	0.494711	0.427311	0.398674	0.410999	0.39751	0.451092	0.434469	0.46414	0.553687	0.542196			0.632772						0.711143	0.733067	0.69377		0.700461	0.749983	0.692793	0.736857	0.802615	0.840524	0.899935	0.927548	1.0697	1.17883	1.06255	1.03535	1.11395	1.19577	1.04441	0.918048	0.914215	0.94397	0.846655	0.876855	0.885241	0.976036	0.937757	0.897194		0.935785
0.103312	0.172578	0.319498	0.397512	0.505922	0.595587	0.688004	0.771664	0.751338	0.763025	0.708753				0.569861				0.52156	0.514617	0.66804		0.651096	0.719364	0.669574	0.719693	0.668777	0.764677	0.930349	0.82924	0.773302	0.769486	0.757108	0.807778	0.738676	0.679605	0.692806	0.69199	0.718148	0.671357	0.7195	0.757883	0.694233	0.678936	0.646333	0.618845
0.161091	0.14888	0.151308	0.178888		0.155026	0.133364	0.150837	0.146638	0.174065	0.187862	0.215135	0.207514		0.241606	0.222511			0.286639			0.281454	0.21257	0.24703	0.215153	0.186228	0.203692	0.218001	0.203876	0.230833	0.197745	0.173615	0.185364	0.144047	0.16299	0.170923	0.235609	0.220276	0.238474	0.27514	0.239033	0.234932	0.235046	0.237864	0.246369	0.251481	0.257721	0.191372	0.206006	0.162341
0.528049	0.551769	0.509453	0.521951	0.520983	0.528541	0.598715	0.604776	0.627436	0.689688	0.739955	0.723832	0.774193	0.764142	0.825162	0.809992	0.772485	0.677038	0.631893	0.538938	0.460749	0.48665	0.458785	0.463295	0.486196	0.444771	0.525196	0.566108	0.557948	0.554147	0.542429	0.619481	0.587037	0.630901	0.57096	0.585326	0.584759		0.553214	0.58406	0.614711	0.607648	0.689376	0.712137	0.786657	0.8371	0.841327	0.864463	0.866018
0.860962	0.823571	0.808135	0.716366	0.66383	0.672996	0.70672	0.644751	0.672606	0.653506	0.701689	0.7108	0.729176	0.768905	0.782382	0.695154	0.76585	0.683877	0.78056	0.760107	0.810991	0.595149	0.581795	0.626448	0.803868	1.03457	1.00167			0.81862	0.933832	0.803709	0.786451	0.769454	0.670828	0.743869	0.850955	0.852894	0.697106	0.725643		0.682415	0.691531	0.634425	0.58705			0.721892	0.824063	0.661431
0.330196	0.386949	0.380572	0.440209	0.378138	0.456294	0.511995	0.50417	0.496561	0.506224	0.47648	0.480926	0.474538	0.528971	0.482486	0.547591	0.578605	0.565753		0.60008	0.625287	0.641775	0.644581	0.658456	0.575146	0.595494	0.589535	0.582521	0.575588	0.59485	0.555057	0.515863	0.527053	0.524778	0.568641	0.564852	0.584412	0.591452	0.647233	0.673474	0.667444	0.659363	0.648322	0.628661	0.610935	0.61903	0.595753	0.573593	0.566511	0.591505
0.134588	0.159617	0.127946	0.145056	0.182833	0.16774	0.224078	0.271023	0.287268	0.376325	0.442749	0.483009	0.545703	0.540154	0.630624	0.605874				0.74406	0.795024	0.76717	0.711597	0.641493	0.58461	0.581758		0.517686	0.56875			0.611964	0.637781	0.678857	0.56798	0.697656	0.645649	0.48742	0.447977			0.44964	0.384315		0.406322	0.391596	0.369723		0.369977	0.323074
0.281548	0.257896	0.262057	0.277941	0.349004	0.421352	0.516511	0.565213	0.610738	0.571651	0.552684	0.535291	0.516802	0.6582	0.606734	0.623668				0.893391	0.808988		0.616874	0.567078	0.498016	0.546135	0.51318	0.49742	0.529463	0.604584	0.610149	0.636493	0.669093	0.660965	0.625993	0.608574	0.566354	0.579422	0.596421	0.612489	0.575305	0.61823	0.591855	0.581679	0.564034	0.550531	0.525773	0.573455	0.572366	0.54387
0.326325	0.324195	0.351698	0.378886	0.407319	0.441924	0.662916	0.762889	1.35151	0.597692	0.585781	0.579534	0.455696	0.51574							0.407147	0.471381	0.470374	0.517888	0.508723	0.622831	0.686235	0.735981	0.750631	0.698238	0.695975	0.729875	0.471652	0.512153	0.496797	0.529852	0.50089	0.513503	0.45161	0.552325	1.11039	0.998582	0.820086	0.929799	0.841437	0.789343	0.765324		0.754785
0.881629	0.916006	0.926106	0.894887	0.938095	0.921707	0.80781	0.799154	0.897607	0.917041	0.852421		0.733363	0.671672	0.746046			0.775268	0.691751	0.689845	0.65648	0.673417	0.682058	0.628263	0.612908	0.626619	0.659398	0.653056	0.665329	0.68467	0.630946	0.73054	0.76619	0.848505	0.939846	0.932446	0.907511	0.851948	1.06013	0.900328	0.951544	1.03425				0.810716	0.681737		0.678343	0.679364
0.385041	0.356232	0.420351	0.488101	0.446511		0.506451		0.50262	0.65493	0.592844	0.711193				0.780745		0.514972		0.61275		0.613047	0.287809	0.323415				0.258627	0.21801	0.278754	0.225836	0.258286	0.286992	0.259309	0.28636	0.27937	0.338246	0.360382	0.37538	0.26542	0.299969	0.309656	0.347753	0.370508	0.367944	0.34006	0.401294	0.344822	0.401857	0.450796
1.17721	1.24169	1.24197	1.35187	1.38378	1.31525	1.48246	1.57152	1.50665	1.52452	1.5387	1.52534	1.46327	1.25599	1.10085	1.14422	1.38039	1.30522	1.27411	1.17382	1.11701	1.10648	1.08711	1.10135	1.10293	1.13689	1.09034	1.19219	1.24953	1.34861	1.39063	1.48477	1.55159	1.5348	1.51727	1.24463	1.00974	0.701049	0.72956	0.741907	0.609608	0.51337	0.488502	0.496051	0.487295	0.403599	0.389386	0.409179	0.406172	0.40151
0.437865	0.443846	0.518906	0.478547	0.4911	0.54848	0.559542	0.59122	0.56579	0.690021	0.666723	0.724758	0.851049	0.955571	0.944894	1.16683	1.29815	1.23706	1.34981	1.2157	1.23291	1.10221	0.990619	1.02804	0.99299	0.957389	0.952235	0.961779	0.879392	0.911739	0.956261	0.910022	0.88886	0.863237	0.97313	0.821328	0.769274	0.891566			0.960659	0.655992			0.56389		0.765515	0.678285	0.543636	0.577322
0.532171	0.423156	0.425404	0.377045	0.411717	0.521027	0.588944	0.662548	0.648167	0.571348	0.523415	0.462341	0.505428	0.507594	0.426558	0.468587		0.409527	0.425402	0.400258	0.383875		0.371971	0.405812		0.396371	0.399428	0.434529	0.478872	0.418808	0.384109	0.425024	0.392628	0.391697	0.412129	0.432562	0.437602	0.470405	0.444886	0.516731	0.539908	0.555444	0.5688	0.577117	0.509231	0.479933	0.422405	0.395344	0.332537	0.312717
0.866529	0.918522	0.873978	0.828438	0.844645	0.91449	0.973678	0.997261	1.04854	1.10724	1.01176		1.08811	1.09062	1.04866	1.19392	1.13774	1.20216			1.22048	1.29763	1.22761	1.17953	1.19024	1.15542	1.15765	1.26881	1.37035	1.28278	1.43633	1.4022	1.01543	1.0497	0.993223	0.962157	0.897915	0.873214	0.908106	0.84092	0.831085	0.785384	0.722307	0.708791	0.701625	0.690493	0.699478
1.05764	1.08931	1.13652					1.6483			1.48922	1.49131	1.34592	1.39045	1.26018	1.24117	1.26983	1.24177	1.20882	1.20129	1.23701	1.13966	1.06503	1.02047	0.961461	1.05953	1.02275	1.17316	1.1603	1.232	1.26761	1.26591	1.24256	1.16884	1.13405	1.13878	1.04357	1.00253	0.95717	0.928334	0.985379	0.963791	0.854304	0.81852	0.879034	0.837442	0.848481	0.821809	0.85169	0.87233
0.57317	0.580977	0.54991	0.530406	0.528352	0.56927	0.581578	0.620728	0.784716	0.91698	0.976151	0.940895	0.939919	0.960941	0.954084	0.843191	0.857496	0.784246	0.682945	0.588458	0.591595	0.522327	0.502168	0.470743	0.477159	0.478298	0.47149	0.429412	0.48973	0.508787	0.533684	0.557726	0.562986		0.61554			0.708163	0.708141	0.803018	0.815831	0.824705	0.80345
0.592942	0.628203	0.578667	0.558406	0.637239	0.735142	0.86076	0.919457	1.03591	0.955105	0.804601	0.732087	0.690827	0.869233	0.777789	0.858349	0.901862		0.844003	0.852049	0.858585	0.874195	0.774424	0.838142	0.850157	0.949896	1.45721	1.52353		0.740995	0.658658	0.546677	0.481763	0.635935	0.712001	1.0174	0.953763	1.01486	0.888708	0.742387	0.876976	0.806668	0.843129	0.730766	0.813029	0.790698		0.791679		0.765932
0.688864	0.854155	0.775902	0.768525	0.778815	0.880293	0.956745	0.932402	0.989239	1.00034	1.16501	1.35373	1.68301	1.77764	2.31804				2.98243			2.20136			2.89792	2.43228	2.23501	2.4809	2.33509	2.41694	2.43302	2.56245				2.54666	2.62342	2.71659	2.81772	2.47665	3.05496	3.20847	3.13107	3.05171		3.01714	2.74654	2.81036	2.95932	2.99761
0.340063	0.390521	0.418102	0.434666	0.433581	0.483702	0.529738	0.511012	0.549415	0.607623	0.635202	0.674926	0.612436	0.55753			0.403112	0.346715	0.326575	0.32295		0.545776	0.433157	0.399106	0.459038			0.81471	0.539607	0.609793	0.627605	0.511172	0.560857	0.586497	0.558313	0.562538	0.561512	0.577251	0.62368	0.585495	0.547398	0.557062	0.498364	0.457905	0.393217	0.334881	0.339095	0.328705	0.287518	0.239349
0.708045	0.890042	0.902304	0.971947	0.969775	0.835891	0.804602	0.791022	0.703962	0.720878	0.74782							0.695171			0.687393	0.691432	0.699885	0.66647				0.590718	0.575399	0.589675	0.575752	0.538003	0.577149	0.624724	0.592939	0.559776	0.553711	0.583667	0.613287	0.592722	0.577335	0.546167	0.508084	0.531667	0.591537	0.571364	0.54459	0.516175	0.650441	0.632826
0.482847	0.524555	0.478561	0.475935	0.64292	0.51674	0.461756			1.30131	1.22165	1.27614	1.24607				1.90095	2.44146	1.41199		0.696062	0.72575	0.732966	0.755849	1.0138	0.723455	0.941145	1.16217	1.08611	1.14378	1.03084	1.22203	1.20485	1.24383	1.1631	1.29687	1.46324	1.37828	1.2835	1.22411	1.42404	1.13242	0.848521	0.945286	1.14256	0.795415	0.882552	0.758959	0.791841	0.877108
0.17687	0.144397	0.155673	0.208887	0.170157	0.203701	0.281922	0.331905	0.330396	0.416699	0.381443	0.369181			0.563354		0.58901					0.434824	0.415164	0.385264	0.415478	0.317814		0.403733		0.362191	0.368208	0.362576	0.361096	0.331934	0.354465	0.354727				0.54519	0.628574	0.665482	0.775662	0.71472	0.795219	0.884557	0.780448	0.817847	0.779845
0.813169	0.977643	0.874284	0.935945	1.01248	1.05244	0.993397	1.13736	1.12052	1.08809	1.00753		1.13098	0.943691					1.10962	1.15915	1.09709		0.879132	1.00436	0.818304	0.746303	0.7501	0.760754	0.671175	0.719469	0.605458	0.851185	0.586306	0.643177	0.559874	0.468348		0.531989	0.530368	0.582801	0.492092	0.499947	0.568272	0.529731	0.552848	0.545586	0.69953	0.675096	0.982102	0.822978
1.21488	1.32835	1.44497	1.32475	1.14766	1.15965	1.18176	1.27981	1.19722	1.23037			1.38637	1.50889	1.42875			1.21085		1.10262		0.82526	0.79099	0.738861	0.648356	0.634982	0.599355	0.589871	0.614028	0.634781	0.651659	0.706606	0.748888	0.752167	0.739752	0.797374	0.845519	0.925426	0.974193		1.0368	1.05681	1.04052	1.03678	0.962404	1.40037		0.673911
0.795924	0.809366	0.803411	0.798969	0.870466	0.876642	0.93852	1.03428	1.02493				1.25701	1.14553	1.03579	1.0169	1.11318		1.37575		1.30196	1.24168	1.25347	1.09939	1.00618	0.950503	0.88266	0.866642	0.870212	0.890565	0.92354	0.919353	0.926126	0.840955	0.946987	0.90863	0.960346	1.04272	1.1138	1.09689	1.09722	0.979457	0.978993	1.04977	1.01616	1.04664			1.03908	1.03043
0.638256	0.777618	0.83738	0.900839	1.02269	1.03343	1.04754	1.13193	1.0816	1.05732	1.04856	1.1672	0.999328	1.04503	0.953737	0.988486	1.00069	0.948257	0.951659	0.951128	0.842608	0.809782	0.80992	0.830325	0.916021	0.914762	0.974957	0.983693	1.05773	1.03325	0.970375	1.10093	1.06384	1.13742	1.1735	1.22623	1.23639	1.16169	1.20539	1.24475	1.26719	1.29898	1.36682	1.42121	1.40449	1.38519	1.40425	1.40524	1.39158	1.43446
0.94438	0.976299	0.948283	1.15126	1.218	1.29328	1.33686	1.3867	1.34777	1.33239	1.14913	1.11966	1.07434	1.13987	1.03453	1.00826	0.892331	0.843411	0.821835	0.796316	0.779961	0.777606	0.773135	0.776265	0.804932	0.800063	0.867696	0.92294	0.93618	0.956341	0.949115	0.925168	0.910148	0.922551	0.944675	1.03259	1.06903	1.14252	1.17238	1.13475	1.16773	1.31545	1.31204	1.30251	1.29511	1.19376	1.05666	0.971691	0.878426	0.816592
0.832458	0.861838	0.910886	0.834033	0.785541	0.745982	0.79253	0.865364	0.900689	0.940651	0.950392	1.07204	1.19061	1.30407	1.30776	1.32239	1.23213	1.28516	1.12647	1.22464	1.26667	1.17167	1.04928		1.00822	1.04513	0.926403	0.959233	0.930597	0.914025		1.01512		1.01557	0.89367	1.04129		0.990213	1.09821	0.974693	0.904683	0.941884	1.00916	1.05767		1.00656	1.04133	0.970348	1.10268	1.01191
0.60303	0.598201	0.615713	0.614681	0.546679	0.566963	0.56853	0.624096	0.553198	0.519162	0.603195	0.736125	0.750629	0.662128	0.63257	0.581478	0.510887	0.587524		0.483309	0.498412	0.505448	0.507223	0.543998	0.501023	0.561783	0.70292	0.648238	0.589014	0.90134		0.629649	0.535941	0.587243	0.649115	0.670983	0.684452	0.735302	0.770095	0.706915	0.718456	0.745304	0.758063	0.743251	0.716535	0.652054	0.602551	0.546252
0.286763	0.310778	0.280236	0.300542	0.314405	0.30772	0.283115	0.275968	0.307561	0.308036	0.321932	0.359305	0.42813	0.396816	0.388361	0.442475	0.444829	0.454075	0.430087	0.424852	0.411824	0.394201	0.350387	0.350421	0.360985	0.360229	0.372147	0.384449	0.386296	0.398144	0.41397	0.415829	0.417603	0.443603	0.453328	0.460991	0.474681	0.408393	0.379357	0.390274	0.384666	0.393249	0.335331	0.358836	0.356132	0.302354	0.313841	0.304316	0.322634	0.347364
0.552346	0.448424	0.539298	0.538482	0.600785	0.596178	0.603617	0.540996	0.64155	0.578187	0.625247	0.444581	0.538204	2.48413	0.687921	0.407802	1.15503	0.874268	0.599039	0.676814	0.780819	0.831831	0.852653	0.835157	1.05816	1.17744	0.89211	0.930348	1.03539	0.959913	1.04624	1.11804	1.1069	0.925946	1.13193	0.996078	0.962493	1.00473	1.11312	0.852757	1.16792	0.918041	0.864756	0.941028	0.847872	0.667973	0.59742	0.638276	1.02925	1.30564
0.52478	0.591384	0.51534	0.570379	0.46261	0.434009	0.487817	0.555064	0.569201	0.57306	0.595438	0.581905	0.60585	0.656493	0.745251	0.807676	0.84778	0.840253	1.00158	0.971052	0.889143	0.928777	0.912242	0.828765	0.933392	0.918909	0.911229	0.89523	0.973757	0.945528	0.880328	0.835389	0.83841	0.783348	0.762568	0.702604	0.689059	0.740465	0.681486	0.652362	0.665908	0.694972	0.686992	0.723819	0.7531	0.775211	0.762552	0.750018	0.863349	0.886628
0.886314	0.947582	0.87893	0.870078	0.937544	1.08438	1.19657	1.41665	1.47852	1.47773	1.35474	1.50171	1.49706	1.52544	1.60466	1.40719	1.41723	1.24509	1.11618	1.02998	1.0215	0.960156	0.996507	0.932047	1.05175	1.14153	0.956282	0.971137	1.05077	0.927321	0.974031	1.05146	1.07032	1.04703	1.00469	0.978251	0.992768	1.06216	1.01896	1.12506	1.14391	1.10348	1.10449	1.05155	1.0363	1.07058			1.01346
1.27461	0.710587	0.519869		0.577341	0.715246	0.719352	0.80106	1.08203	1.09812	0.922584	0.875603	0.925497	0.922194	1.03816	1.12733	1.08426	1.01671	0.997527	0.95075	1.02344	1.00217	0.833681	1.00982	1.23744	1.19446	1.33662	1.33775	1.38554	1.50934	1.21506	1.24704	1.16352	1.34284	1.27995	1.32698	1.2545	1.19346	1.23104	1.29867	1.12632	1.04314	0.948309	1.00627	0.951957	1.05548	1.1196	0.998777	0.96296	0.951218
0.360718	0.335293	0.380555	0.36063	0.342373	0.342089	0.382438	0.336215	0.365128	0.390407	0.405061	0.426114	0.457482	0.498497	0.522786	0.513025	0.503419	0.459999	0.510417	0.480446	0.537878	0.603135	0.648921	0.595022	0.582129	0.64759	0.67376	0.644076	0.674938	0.661976	0.691737	0.724879	0.74611	0.801567	0.670739	0.623229	0.609012	0.529265	0.487002	0.447709	0.46362	0.45681	0.414644	0.420969	0.398219	0.41248	0.380913	0.386866	0.435783	0.413156
0.361964	0.370974	0.380749	0.395654	0.433128	0.49926	0.488971	0.548009	0.570747	0.571231	0.662644		0.754398		0.832523		0.881198	0.856787	0.907633			0.815474		0.7238	0.610392		0.651423	0.641889	0.660675		0.772678	0.652849	0.675903	0.693666	0.892725	0.639166	0.827291	0.601698	0.83349	1.12028	1.13673	1.06718	1.17891	1.11962	1.29277	1.48683	1.39613	1.59365	1.63209	1.91931
0.498288	0.442322	0.439563	0.421278	0.430027	0.389968	0.452432	0.478181	0.529618	0.538804	0.556041	0.605309	0.597665	0.649587	0.713464	0.762709	0.805601	0.84673	0.802432	0.895075	0.898308	0.885969	0.854582	0.774142	0.732407	0.740953	0.7776	0.787337	0.830522	0.791485	0.774838	0.789841	0.761626	0.748013	0.787524	0.784702	0.76939	0.804111	0.809466	0.852998	0.894281	0.866762	0.841126	0.816642	0.833564	0.837476	0.851241	0.858631	0.841636	0.862013
1.06989	1.06594	0.924377	0.825097	0.775463	0.70996	0.760681	0.680634	0.679026	0.618378	0.634152	0.619272	0.637793	0.686842	0.788704	0.906285	0.878029	1.03766	1.02511	1.03853	0.979926	1.09205	1.12098	1.04426	1.01831	0.992824	1.10069	1.09615	1.04024	1.10859	1.09978	1.09222	1.07795	1.07649	1.01046	1.04416	1.03795	1.0178	1.01556	0.984511	1.06816	0.974166	0.906715	0.958856	0.934386	0.867905	0.857727	0.865018	0.835926	0.757544
2.65046	2.75861	2.48658	2.72576	2.03827	2.10134	2.1825	1.84959	1.62803	1.98619	1.47712	2.03765	1.99578	1.87307	1.84982	1.74813	1.90533	2.04672	1.98148	2.04379	1.97258	1.96637	2.0328	2.40388	2.3729	2.6483	2.33712	2.4267	2.10829	1.85098	2.45822	2.7948	2.15973	2.05917	2.29146	1.99449	1.85018	1.72472	1.45606	1.73629	1.83555	1.46689	1.7842	1.55861	1.36258	1.44622	1.45001	1.78177	1.42237	1.6119
0.45298	0.459028	0.486374	0.465583	0.465517	0.524935	0.584611	0.543626	0.564765	0.616413	0.590687	0.594446	0.593937	0.573193	0.654672	0.636142	0.732504	0.831885	0.91337		1.13314	1.38497	1.10567	0.536857	0.473102	0.531962	0.36244	0.648839	0.48939	0.446742	0.576595	0.838125	0.867065	0.840853	0.796598	0.787773	0.694429	0.648893	0.609721	0.653988	0.63576	0.564128	0.542159	0.558212	0.57205	0.634589	0.671176	0.751313	0.777575	0.776834
0.55748	0.612713	0.623997	0.564704	0.613631	0.687201	0.795594	0.838467	0.754303	0.893617	0.806519	0.736845	0.752862	0.804877	1.12439	0.833792		0.803135	0.910682	0.91317	0.741098	0.757415	0.710385	0.765624	0.766698	0.734959	0.758428	0.698418	0.812677	0.937222	0.899888	0.895547	0.886334	0.865988	0.884997	0.749196	0.741576	0.723397	0.723713	0.713321	0.733969	0.697753	0.738693	0.653371	0.647225	0.602297	0.593667	0.571737	0.63082	0.662096
0.871209	0.747598	0.685704	0.668028	0.64078	0.693142	0.764277	0.821887	0.906747	1.0647	1.01207	0.971299	0.872974	0.809035	0.762026							0.782761	0.635739	0.628567	0.566807	0.600414		0.565787	0.616005	0.587958	0.593184	0.607719	0.697557	0.64644	0.642226	0.60057				0.769042	0.63891	0.635511	0.578137	0.549649	0.577796	0.599491	1.30652	1.17847		0.842642
0.734589	0.623276	0.672222	0.69372	0.757983	0.858231	0.780613	0.796666	0.691472	0.668129	0.666548	0.601654	0.65613	0.805313	0.733098	0.737647	0.754189	0.796752	0.864169	0.767689	0.756519	0.81905	0.831196	0.871652	0.813967	0.830726	0.869876	0.999459	1.12765	1.19859	1.04151	1.1381	1.18683	1.11755	1.23115	1.18561	1.08126	0.949522	0.781013	0.789425	0.732995	0.740156	0.704713	0.684859	0.628414	0.585135	0.577719	0.575661	0.549875	0.558264
0.756163	0.702293	0.655381	0.643306	0.722339	0.721653	0.714838	0.735708	0.646723	0.718487	0.732189	0.854942	0.861976	0.795425	0.806843	0.881968	0.791942		0.7733	0.707156	0.732629	0.674628	0.763687	0.774853	0.799477	0.824728	0.877321	0.842539	0.784672	0.958212	1.01938	1.01753	0.97509	0.900652	0.97015	0.947478	0.919501	0.928265	0.941597	0.937493	0.964703	0.943219	0.850414	0.73555	0.685101	0.648066	0.635866	0.647352		0.649073
0.404654	0.47672	0.681498	0.624037	0.685448	0.704613	0.695953	0.690356	0.729251	0.671718	0.706725	0.707713	0.735701	0.720923	0.748936	0.784998	0.75119	0.825629	0.880445	0.885557	0.899461	0.947804	0.903858	0.826215	0.805497	0.787959	0.775584	0.839352	0.832629	0.949556	1.24461	1.58692	0.709687	0.689268	0.696563	0.66576	1.05319			0.902944	0.954847	0.941101	0.905004	0.801336	0.588447	0.4616	0.367022	0.339888	0.331109	0.400463
0.396049	0.395433	0.362774	0.397848	0.359703	0.418574	0.440517	0.462247	0.470052	0.521243	0.526037	0.563267	0.598509	0.624832	0.61493	0.634624	0.6417	0.643671	0.601883	0.626778	0.587373	0.568464	0.604075	0.548496	0.565428	0.501815	0.516506	0.497059	0.528616	0.517945	0.635502	0.513976	0.608059	0.588772	0.562709	0.520078	0.532531	0.549365	0.557502	0.494275	0.603332	0.643744	0.619284	0.478264	0.479881	0.351385	0.376114	0.382955	0.382274	0.415724
0.479628	0.537342	0.615809	0.608247	0.588388	0.605269	0.623781	0.61381	0.619732	0.659157	0.633001	0.657312	0.623517	0.503485	0.52405	0.486135	0.496551	0.527576	0.634403	0.576988	0.655715			0.65785	0.737129	0.786073	0.801987	0.822226	0.836971	0.801247	0.823272	0.847451	0.852016	0.900892	0.900956	0.889113	0.797248	0.778011	0.692061	0.627046	0.641708	0.7668	0.760472	0.957777	1.40141	1.05172	0.469648	0.494276	0.339261	0.131466
0.636878	0.646442	0.680363	0.698065	0.712187	0.677956	0.665671	0.736599	0.811618	1.02604	1.24568	1.36053	1.33957	1.24372	1.17501	0.887985	0.817861	0.738802		0.679473	0.645526	0.589055	0.557779	0.52128				0.575022	0.618093	0.63897	0.647582	0.661505	0.725293	0.749577	0.716219	0.681185	0.622714	0.618776	0.646128	0.649595	0.684414	0.682099	0.669195	0.645799	0.631581	0.595688	0.602065	0.559746	0.582472	0.524518
0.424697	0.466664	0.466281	0.459667	0.505385	0.474375	0.528947	0.5102	0.520214	0.579822	0.623596	0.664349	0.671609	0.768673	0.737126	0.72594	0.700295		0.675748	0.643769	0.656355	0.761379	0.806329	0.798944	0.803502	0.814365	0.850786	0.963838	0.901245	0.930049	0.931106	1.02249	1.02564	1.01497	1.09875	1.10149	1.05503	1.0255	1.12568	1.29793	1.82479	1.52669	0.843788	0.750053	0.704658	0.448193	0.0630017	0.320284	0.749238	0.976891
0.391268	0.406675	0.384705	0.374651	0.389762	0.397579	0.387295	0.435601	0.47721	0.53404	0.555416	0.578202	0.572964	0.646984	0.745894								0.784719		0.681005	0.63861	0.659837	0.611567	0.618163	0.664542	0.713693	0.706584	0.719616	0.724047	0.700566	0.704409	0.764555	0.745757	0.729319	0.700145	0.678181	0.664676	0.663592	0.637183	0.622572	0.660277	0.654466	0.699954	0.579692	0.569877
0.249822	0.296069	0.213833	0.400812	0.428592	0.667354	0.34734	0.415422	0.475342	0.487142	0.534687	0.543762	0.632292	0.66704										1.05405	1.09038	1.11907	1.17499	1.09389			1.28857	1.22295	1.10845	1.03817	1.04593	1.02593	0.974548	1.17154	0.940436	0.885316	0.913579	1.06057	1.00629	1.03663	0.980517	0.978085	0.871394	0.892503	1.53217	1.05642
0.591983	0.676385	0.659812	0.733722	0.8279	0.951564				0.478427	0.425009	0.352933	0.56219	0.613419	0.467909	0.500303	0.263652	0.357827	0.382541		0.433589	0.467957	0.51673	0.630593	0.598184	0.682005	0.683908	0.71088	0.713662	0.617246	0.622767	0.664277	0.619217	0.678746	0.620601	0.661262	0.705206	0.744071	0.837645	0.862253	0.836018	0.87493						1.08798	1.27799	0.864821
0.491103	0.549666	0.519858	0.438957		1.11828	0.906071		0.616606	0.852582	0.505352	0.49451	0.468153	0.460872	0.490147	0.561237	0.545767	0.562763	0.596758	0.623046	0.638805	0.666711	0.635936	0.636239		0.713809	0.69446	0.762742	0.756308	0.795889	0.909223	0.90739	0.903596	0.940601	0.957165	0.926865	1.03311	1.00653	0.909343	0.827352	0.869012	0.853211	0.815499	0.76448	0.707805	0.732906	0.719874	0.733414	0.716127	0.780292
0.442441	0.503037	0.497602	0.509109	0.502239	0.571392	0.551543	0.541833	0.548138	0.603589	0.610741	0.559965	0.576	0.579369	0.691101	0.780789	0.874635	0.952163	1.20966	1.05337	1.04581	0.824089	0.890869	0.938001	0.616616	0.638629	0.664469	0.750813	0.674104	0.733742	0.756765	0.659784	0.641055	0.63777	0.600058	0.595286	0.531403	0.461296	0.421241	0.39167	0.413816	0.414895	0.410595	0.411359	0.450664	0.36795	0.362458	0.419134	0.395843	0.526963
0.838566	0.793794	0.84378	0.908631	0.896291	0.945967	0.955388	1.07368	1.08086	0.954853	0.964034	0.91454	0.883687	0.868163	0.96184	0.975036	1.10125	1.08372	1.15128	1.06046	1.08863	1.15808	1.24642	1.39208	1.543	1.52334	1.63303	1.64073	1.62878	1.55176	1.35936	1.26978	1.30166	1.41459	1.3702	1.2376	1.111	1.0715	1.01056	0.828843	0.78755	0.794328	0.818339	0.738199	0.77181	0.872926	1.03928	1.18313	1.31179	1.29267
0.57572	0.465004	0.524338	0.517926	0.491619	0.49155	0.565783	0.525737	0.552134	0.521924	0.576374	0.581483	0.620176	0.637726	0.645508	0.729483	0.62024	0.580162	0.791615	0.628663	0.602475	0.524695	0.516789	0.487816	0.533907	0.555042	0.958301		0.857311		1.39281	1.28814	1.43516	1.23346	0.0661976	0.0336545	0.0444881	1.14151	1.59189	0.393927	0.152952	0.269599	0.251241	0.295227	0.305486	0.475443	0.463993	0.689045	0.792808	0.734789
0.481288	0.743692	0.799661	0.632599	0.690068	0.68888	0.613591	0.596402	0.515574	0.48928	0.440132	0.3885	0.386199	0.400349	0.348196	0.393924	0.406738	0.3658	0.369788		0.474219	0.509294	0.521988	0.540028	0.587112	0.62028	0.620308	0.748469	0.892627	0.997653	1.12421	1.14804	1.1393	1.24418	1.22285	1.20841	1.16429	1.14509	1.12603	1.09947	1.04268	0.971669	0.843023	0.685996	0.581968	0.499377	0.402851	0.365341	0.382082	0.388822
1.44305	1.317	1.31564	1.4588	1.34435	1.20735	1.04791	1.11575	0.8256	0.811347	0.859646	0.727656	0.657154	0.8554	0.681907	0.744628		0.686227	0.746597			0.688755	0.650308	0.664805	0.691201	0.776922	0.693967	0.750518	0.908378	0.86162	0.828272	0.945466	0.889413	1.17431	1.40287	1.01918	0.925375	0.998668	0.989709	0.943987	0.75129	0.801172	1.14151	0.922538	1.17403	1.18162	1.16795	1.17243	1.46019	1.41765
0.691305	0.610161	0.669578	0.753649	0.745341	0.878924	0.851052	0.917598	0.910895	0.985585	1.0088	1.04042	1.07533	1.12964	1.1762	1.31936			1.31142	1.33707	1.2515	1.32175	1.31918	1.38165	1.48534	1.56664	1.59948	1.66732	1.58012	1.58038	1.51115	1.46258	1.38154	1.35372	1.28885	1.25284	1.22105	1.29147	1.26173	1.37416	1.27559	1.31262	1.22479	1.27584	1.29211	1.3345	1.46127	1.50532	1.59863	1.61692
0.389073	0.432411	0.617063	1.09654	0.784187	0.783365	0.646899	0.611946	0.589685	0.570177	0.493606	0.436255	0.717244								0.722811		0.781278	0.810342	0.902876		0.955102	0.855994	0.866743	0.90235	0.868523	0.84063	0.817759	0.807357	0.759379	0.79208	0.62304	0.533778	0.791421	0.90631	0.816378	0.804475	0.89532	0.91772	0.99282	1.04279	1.05751	1.10092	1.14978	1.0954
1.06455	0.983355	0.979793	0.983594	1.11066	1.2095	1.44047	1.44298	1.41727		1.64594	1.69106	1.74072	1.73282	1.5003	1.44092	1.29429	1.1813	1.07613				1.03162	1.05298	1.04481				1.05898	1.02935	1.08637	1.12334	1.1943	1.24261	1.29691		1.31452	1.43798	1.54809	1.50328	1.42224	1.4102	1.6467		1.57718			1.0072		1.66416
1.53203	1.12336	1.13591	1.07785	1.08478	0.897936	1.25837	1.27561	1.22507	1.07612	1.18524	1.30179	1.09479	1.1479	1.22002	1.11969	1.08651	1.0836	1.03203	1.11918	1.02915	0.914586	1.08204	1.77423	1.19175	1.24875	1.4638	1.51583	1.5835	1.54168	1.46727	1.47311	1.51378	1.32782	1.29427	1.67775	1.63262	1.7413	1.81895	1.75001	2.03647	1.99957	2.03323	1.9706	2.02016	1.89561	1.90377	1.83108	1.68626	1.70348
0.546184	0.568629	0.647802	0.661967	0.73717	0.799076	0.847573	0.97301	0.847269	0.87128	0.999977	1.01833	1.04175	1.05725	1.11268	1.03818		0.958319					1.06688	1.13391	1.13367	1.21111	1.31349	1.40539	1.43974	1.53585	1.78687		1.53931	1.53902	1.45614	1.51624	1.58736	1.59499	1.98818	0.655572	0.714464			0.456145		1.05009	0.553859	0.91772
0.989034	1.12234	1.37159	1.12291	1.10952	1.20634	1.53729	1.47738	1.59912	1.72958	1.27914	1.95757	2.03323		2.71273	2.51549		2.58187	2.11284	2.66075		2.61097	2.54125	2.68677	2.65384	2.11641	2.12348	2.34551	1.96599	1.91535	2.35335	2.23236	2.2681	2.31681	2.27452	2.56204	2.26527	2.39066	2.10417	2.3676	1.81691			1.62658	1.42017	1.37288	1.2344	1.12833		1.34512
1.07179	1.64266	1.04578	0.902444				0.948468	1.0242	0.815304		0.662838	0.5795	0.489017	0.550591	0.842217	0.944024	0.949416	0.970438	0.861032	0.843136	0.808289	0.898737	1.0021	0.947513	0.896932	0.705944	0.829618	0.777627	0.702885	1.21139	0.937842	1.00383	1.06075	1.00415	0.960943	0.910819	0.930032	0.827248	0.934805				1.22638	1.17024	1.1935	1.16214	1.10194	0.997599	0.878027
0.759459	0.751173	0.827201	0.796514	0.853256	0.82151	0.7655	0.82649	0.814502	0.790631	0.815805	0.830414	0.97801	1.00213	1.12059	1.25169	1.19941	1.21323	1.21126	1.19589	1.26378	1.26259	1.2833	1.2885	1.31291	1.25213	1.30128	1.35254	1.33494	1.428	1.52816	1.48951	1.428	1.41433	1.38308	1.31305	1.21776	1.09629	1.0642	1.04569	1.00864	0.941348	0.936809	0.874622	0.867835	0.834322	0.819678	0.795751	0.771417	0.763632
0.321368	0.402799	0.490174	0.603443	0.769381	0.833044	1.00526	1.12113	1.18705			1.2168			0.880879	0.826176	0.666635	0.657027	0.633923	0.618169	0.643942	0.60252	0.598752	0.578182	0.58231	0.574676	0.601729	0.601146	0.601624	0.740535	0.81082	0.903761	0.951641	0.973394	0.905821	0.905786	0.668197	0.649725	0.652744	0.683803	0.614093	0.705954	0.666289	0.632024	0.679539	0.583454	0.65455	0.537999	0.711424	0.817
0.605596	0.496876	0.566271	0.562378	0.534291	0.615219	0.732615	0.780382	0.720463	0.733847	0.72924	0.782253	0.804431	0.949144	1.0483	0.847797	0.72105	0.760329	0.800636	0.791152	0.78242	0.764994	0.733333	0.74	0.669819	0.644469	0.620078	0.643195	0.676892	0.642292	0.707814	0.694407	0.614755	0.592684	0.545127	0.52211	0.519195	0.491091	0.504323	0.552468	0.630729	0.624496	0.584775	0.523196	0.552842	0.595765	0.625707	0.604743	0.664948	0.636638
0.358353	0.379142	0.403333	0.381924	0.403507	0.400039	0.406014	0.352608	0.337242	0.348288	0.362479	0.273303	0.317164	0.261534	0.203377	0.248719	0.272201	0.293062	0.370048	0.313511		0.319523	0.311333	0.374097	0.320738		0.32885	0.356806	0.385686	0.379501	0.35212	0.370354	0.38063	0.417151	0.395943	0.403684	0.431431	0.485192	0.461146	0.384694	0.474763	0.419902	0.395749	0.449691	0.543594	0.740116	0.787978	0.823602	0.955281	0.952134
1.04671	1.05705	0.902338	0.886797	0.90899	0.906462	0.900334	0.787298	0.84779	0.918958	1.05683	1.50694	1.60088	1.59849	1.63486	1.64078		1.61108	1.59825	1.58942	1.35901	1.29969	1.31382	1.17658	1.12251	1.11513	1.10726	1.21068	1.10545	1.16875	1.04619	1.11487	0.739728	0.790582	0.808416	0.738969	0.69902	0.642105	0.554615	0.433342	0.388708	0.401635	0.345228	0.356657	0.345328	0.337059	0.35663	0.325254	0.34253	0.336408
1.04792	1.24895	1.6614	1.48858	1.52156					1.22211	0.858375	0.882436	0.735393	0.747408	0.895392							1.22661	1.25038	1.07812	1.06077	1.04944	0.939464	0.984356	1.0116	1.12879	1.20165	1.26831	1.32355	0.84502				0.806015		1.05227	1.21916	1.29473	1.37199	1.46556	1.42999	1.57827	1.19737	1.20822	1.13545
1.22576	1.36341	1.18068	1.07691	1.1481	1.17287	1.16929	1.10263	1.06152	1.00398	0.96402	1.05277	0.964192	0.904127	0.906396	0.896377	0.879444	0.994084	1.19253	1.17376	1.20148	1.14331	1.02948	1.02925	0.983906	0.935621	0.963524	0.890628	0.880906	0.83061	0.8561	0.824018	0.874395	0.889402	0.938265	0.996907	1.04409	1.06847	1.12384	1.20132	1.34968	1.33856	1.34033	1.39583	1.49028	1.50582	1.50928	1.38023	1.32306	1.23268
0.752685	0.748734	0.82243	0.858458	0.819326	0.830889	0.799749	0.81735	0.773231	0.794797	0.737521	0.748716	0.776004	0.759502	0.808638	0.857498	0.871998	0.975554	1.03243	1.29677	1.33345	1.6032	2.0542		0.640144	0.762437				0.449325	0.487375	0.876659	1.47971	1.82704	2.04467	2.15751	2.03422	1.57183	1.36719	1.10527	0.935393	0.843498	0.820957	0.631081	0.436152	0.32978	0.362238	0.299868	0.286711	0.243672
0.651612	0.733673	0.786605	0.852563	0.893404	0.848011	0.928531	0.956794	1.0326	1.05252	1.13666	1.0127	1.04944	1.08036	1.10428	1.15057	1.2065	1.16302	1.11151	1.17747	1.09337	1.06904	1.06415	1.10287	1.08567	1.10398	1.15878	1.03668	1.03547	1.00921	1.09805	1.14587	1.04521	1.01619	1.01692	1.00813	1.08316	1.07708	1.17343	1.13095	1.17778	1.11698	1.14072	1.16114	1.12214	1.13174	1.07153		1.05901	1.01122
0.56566	0.610066	0.533673	0.54137	0.565482	0.58698	0.595786	0.601892	0.620831	0.630024	0.630807	0.661708	0.671793	0.691851	0.783682	0.809902	0.727413		0.821166			0.653992	0.670649	0.624716	0.6203	0.610308	0.606234	0.588165	0.600877	0.660395	0.649277	0.595127	0.667618	0.610421	0.503368	0.503211	0.546185	0.559301	0.56804	0.583902	0.632228	0.626582	0.591321	0.531943	0.562068	0.5533	0.574513	0.598102	0.534659	0.546817
0.405348	0.324615	0.339948	0.526118	0.312435	0.187646	0.296225				0.381887	0.323874	0.408621	0.488137	0.543943	0.498598	0.509786	0.411986	0.426803		0.425997	0.385065	0.405507	0.427309	0.401855	0.502494	0.552855	0.53912	0.585375	0.640622	0.659231	0.672242		0.663738			0.558256	0.506354	0.466096	0.495347	0.453059	0.499383		0.456036	0.432836	0.459523	0.411295	0.486086	0.44999	0.427016
0.333183	0.308744	0.382387	0.425836	0.460118	0.506693	0.553137	0.589943	0.629712	0.674909	0.731723	0.7826	0.766281	0.732509	0.792519	0.717853		0.854332		0.825567	0.783374	0.724401	0.717282	0.66054	0.70603	0.693254	0.759332	0.789531	0.778937	0.841958	0.920414	0.906243	0.954532	0.984576	0.9647	0.933754	0.903945	0.87768	0.929671	0.92853	0.87345	0.818182	0.786279	0.768712	0.781272	0.723922	0.690713	0.68054	0.681329	0.686118
0.781424	0.608147	0.553592	0.722938	0.882051				0.847712	0.613671	0.611266	0.793553		0.877169		1.03836	1.01076	0.95336	0.941693	1.08505	1.03974	1.05453	1.16251	1.15256	1.08586	1.14405	1.12727	1.16766	1.14338	1.0843	1.13803	1.14038	1.16169	1.12972	1.14451	1.15395	1.05165	1.14299	1.11243	1.14798	1.13687	1.18754	1.22878	1.19497	1.16543	1.16447	1.04702	0.94138	0.979222	0.927395
0.607024	0.610141	0.536577	0.636153	0.681986	0.719397	0.902401	0.962574	0.917923	1.0782	1.09625	1.08949	1.22986	1.26613	1.33773	1.40729	1.54092	1.49852	1.38178	1.43529	1.378	1.49382	1.29991	1.44642	1.27638	1.4237	1.32406	1.29706	1.24335	1.30734	1.32485	1.2595	1.35083	1.2547	1.3501	1.60327	1.53644	1.40047	1.37144	1.3695		1.27401	1.21254	1.06249	0.889332	0.796552		0.798504	0.740598
0.693417	0.236467	0.309368	0.369985	0.419675	0.393768	0.45046	0.446791	0.548746	0.577021	0.63849	0.581937	0.58912	0.680555	0.687854	0.816376	0.753633	0.83587			0.830472	0.955043	1.03658	1.01827	1.19355	1.27305	1.16807	1.24569	1.31426	1.24323	1.29634	1.23574	1.29406	1.36312	1.34206	1.30676	1.43339	1.35794	1.51594	1.54881	1.90847	1.83716	1.77713	1.78797	1.69719	1.77347	1.71287	1.66147	1.78211	1.57312
1.96279	0.945137	0.930897	1.03044	0.912168	1.07397						0.60426	0.619548	0.672811	0.719783		0.745736	0.804511	0.887915	0.943551	0.925547	0.902367	0.926936	0.89697	0.951042	0.948611	1.00531	1.07342	1.0903	1.13274	1.11787	1.08883	1.03347	0.925822	0.84589	0.833004	0.775041	0.749005	0.806	0.770707	0.792812	0.755481	0.554044	0.511296	0.644762	0.532616	0.495197	0.50632	0.500247	0.497881
0.466145	0.468741	0.422277	0.44822	0.531891	0.50633	0.474091	0.431113	0.373377	0.38311	0.392032	0.435587	0.372036	0.505995	0.509607	0.503763	0.51113	0.551686	0.666411	0.569055	0.62504	0.684974	0.693919	0.733684	0.725915	0.767763	0.786066	0.795515	0.703244	0.772315	0.715209	0.726147	0.670892	0.646203	0.624169	0.615279	0.669498	0.571774	0.714326	0.855221	0.757706	0.609677	0.550248	0.391588	0.277857	0.240942	0.353602	0.360707	0.42457	0.45591
0.555989	0.737096	0.835364	1.22138	1.39143	1.14519	1.17022	1.04207	0.896741	0.877862	0.774301	0.791188	0.798544	0.718055	0.840927	0.819496	0.818703	0.823512	0.918264	0.825349	0.955081	0.970151	0.940778	1.01235	0.935736	1.06515	1.02268	1.13496	1.11968	1.25604	1.26065	1.3017	1.33485	1.31758	1.28528	1.33726	1.18456	1.11467	1.16477	1.19597	1.17291	1.18744	1.17226	1.14726	1.04958	1.11928	1.11864	1.12901	1.18744	1.16536
0.496826	0.540689	0.57384	0.588324	0.715325	0.768451	0.855346	0.973814	1.02663	1.03011	0.98662	0.861522	0.832902	0.906009	0.940704	0.997645	1.00488	0.998686	0.964777	0.978897	0.966068	0.907251	0.847756	0.800715	0.806513	0.85081	0.840891	0.89918	0.951275	1.0196	1.12225	1.11768	1.18916	1.2531	1.24859	1.29092	1.32978	1.37107	1.37302	1.39741	1.47083	1.52074	1.51047	1.48636	1.55565	1.50603	1.5195	1.56201	1.59052	1.45387
1.25775	1.32423	1.4319	1.43293	1.30827	1.24547	1.22622	1.29309	1.32482	1.31565	1.22168	1.15044	1.30281	1.37483	1.37331	1.44851	1.31047	1.35592	1.51244	1.46081	1.35797	1.22127							1.24195	1.11974	1.00269	0.987012	0.955931	1.03812	1.10846	1.07973	1.15832	1.07848	1.13494	1.03975	0.985857	0.966898	0.945883	0.992412	0.935906	0.924002	0.981788	0.976889	0.946031	0.613691
0.478692	0.475254	0.468302	0.465294	0.479951	0.458944	0.445696	0.472974	0.449055	0.469921			0.667967	0.586289	0.587751	0.696839	0.862401	1.11574	1.42486				0.698493	0.553204	0.534656				0.833856	0.773371	0.638857	0.631441	0.680194	0.840494	0.915754	0.858659	0.900796	0.819525	0.800546	0.796716	0.829211	0.872248	0.792297	0.781188	0.812762	0.740855	0.678952	0.714812	0.714749	0.738024
0.549742	0.87136	1.314	0.551138	0.510518	0.309773	0.687957	0.731254	0.799414	0.740874	0.687437	0.644423	0.603256	0.584294	0.607726	0.601395	0.624056	0.591539	0.570081	0.537723	0.538518	0.49381	0.455768	0.461523	0.461404	0.489928	0.530623	0.531776	0.540837	0.589125	0.580936	0.553187	0.570567	0.567418	0.552648	0.533488	0.507962	0.50683	0.535608	0.504231	0.496165	0.464187	0.464385	0.45691	0.387401	0.327765				0.403413
0.626689	0.902081	1.32919	0.605959	0.716425	0.423246	0.73146	0.525651	0.655293	0.763591	0.872915	0.851107	0.774359	0.794908	0.655382	0.684537	0.728751		0.867743	0.916435	0.962623	0.961862	0.905538	0.853599	0.790404	0.745698		0.692886	0.725358	0.651191	0.665564	0.623567	0.628904	0.654454	0.640625	0.642737	0.644428	0.717505	0.675922	0.721885	0.669608	0.663723	0.693155	0.624735	0.712308	0.687656	0.734101	0.668762	0.677599	0.70665
0.560705	0.558221	0.610881	0.614018	0.605809	0.605313	0.618042	0.619852	0.630003	0.651716	0.66541	0.67088	0.689604	0.744533	0.769272	0.852948		1.05571	1.11784		1.017	0.925083	0.969009	0.934761	1.0053	1.03978	1.09859	1.06444	1.18363	1.15813	1.14122	1.09896	1.00858	0.897012	0.866292	0.819301	0.840233	0.738702	0.666187	0.63055	0.620642	0.574433	0.602075	0.520694	0.466166	0.450819	0.480578	0.465574	0.457655	0.435558
0.765249	0.761771	0.847362	0.836579	0.875676	0.807082	0.843894	0.848358	0.932723	0.931831	1.00913	1.01509	0.96384	0.971572	0.931402	0.917138	0.8315	0.734798	0.70425	0.843056	0.989626	1.06014	1.00075	0.991754	0.964285	0.900978	0.908641	0.975418	0.954946	1.12547	1.13098	1.11962	1.30173	1.20478	1.38022	1.31941	1.31728	1.24066	1.2929	1.35704	1.2664	1.18223	1.04911	0.95009	0.833542	0.777693	0.760603	0.749546	0.724781	0.727151
0.455537	0.413038	0.431581	0.438729	0.488286	0.531679	0.654064	0.697537	0.636491	0.620609	0.61095	0.579257	0.568994	0.556697	0.557921	0.502938	0.518655	0.584343	0.569576	0.688497	0.670995	0.659103	0.690602	0.615936	0.667834	0.626344	0.648161	0.680054	0.699967	0.687481	0.712851	0.749514	0.791203	0.826875	0.843013	0.904242	0.892675	0.836804	0.614418	1.23378	1.40668	0.995045	1.02201	0.75346	0.620737	0.579921	0.476278	0.520914	0.486123	0.439286
0.701815	0.690951	0.584669	0.449009	0.529454	0.682782	0.501316	0.670391	0.596668	0.595181	0.631843	0.597712	0.692263	0.730455	0.716001	0.702514	0.649948	0.74824	0.817175	0.89572	0.815305	0.85798	0.953962	0.702538	0.720297	0.5837	0.838252	0.550609	0.968234	0.894954	0.558993	0.584601	0.842332		0.961191	0.996198	1.0157	1.07324	0.912488	0.628594	0.669857	0.687344	0.691586	0.607602	0.611993	0.604712	0.609081	0.602202	0.614914	0.661131
3.0645	3.22535	3.13099	2.98738	3.08441	2.62688	3.66822	3.82283	4.1351	4.06102	4.10901	3.40369	3.83472	3.35481	3.36476	3.18802	2.46042		3.88066	4.91567	4.82547	4.69535	3.57395	3.7628	3.88792	4.16121	4.12403	3.07914	3.46343	3.65765	3.32985	3.23759	3.63584	3.4047	3.03114	3.98499	4.42184		4.08132	2.91511	5.97997	2.27011	2.6381		3.31094			2.7313	2.28762	1.97869
1.06707	1.05455	0.974264	0.868642	0.867196	0.637976	0.640906	0.6115	0.694149	0.719659	0.733115	0.788927	0.818908	0.901848	0.922326	0.980394	1.04375	1.12573	1.04502	1.11748	1.04662	1.11513	1.30398	1.14942	1.20796	1.18555	1.23883	1.16761	1.3469	1.42588	1.40361	1.39487	1.31637	1.28584	1.22968		1.18456	1.21457	1.12502	1.12401	1.05548	1.20009	1.06602	1.04839	1.26394	1.15912	1.09402	1.15938	1.35301	1.22841
2.2956	1.17262	0.827473	0.988702	1.27802	1.98114	2.71574	1.7144	1.78716		1.87965	1.50731	1.72264	1.63721	1.71077	2.05302	2.06049	1.95182	1.88958	1.9573	2.28988	2.02631	1.8651	1.07207	0.843934	0.894738	1.04456	1.0542	1.32177	1.22349	1.10428	1.14152	1.09481	1.23975	1.18126	1.34295	1.14171	1.2266	1.09162	1.33832	1.34149	1.36286	1.52564	1.51682	1.64361	1.58369	1.66064	1.63925		1.62915
1.6617	1.39666	1.42853	2.1302	1.49783	1.7283	1.84649	1.86558	1.56752	3.83151	1.38339	1.27563	1.74646	2.278	2.3156	2.34164	4.00473	3.9469	1.27165	2.95053	4.57843	2.72339	2.92792	2.34695	3.00031	3.0488	3.41366	2.9868	3.65345	4.69123	5.74434	3.80695	1.50797	1.22173	1.02931	3.34166	0.854348	0.827515	0.725058	0.540301	0.888857	0.669806	1.10245		0.991859	0.878746	0.844905	0.884997		0.710883
0.59467	0.549454	0.523775	0.554644	0.59901	0.629423	0.651759	0.636628	0.699989	0.734198	0.652533										0.895862	1.02979	1.05373	1.06085	1.13913	1.07918	1.04829	1.03069	0.9614	0.997342	0.957125	0.952087	1.06236	1.14045	1.31012	1.52153	0.710375	0.609473	0.588539	0.739105	0.613879	1.28916	1.43617	1.66447	1.58228	1.71413	1.73125	1.62401	1.49456	1.39881
1.13407	1.14313	1.19001	1.19492	1.12752	1.06996	1.03723	0.926859	0.831898	0.859395	0.76907	0.685282	0.620021	0.63917	0.687664	0.907764	0.895981	1.06249	1.04718	1.11999	1.27085	1.24467	1.15959	1.28869	1.32639	1.35163	1.31045	1.25878	1.20004	1.12561	1.15888	1.19479	1.18654	1.16582	1.13747	1.22489	1.2112	1.10931	1.1022	1.08269	1.04261	0.957512	0.927003	0.958955	0.993728	0.994491	1.00319	1.01259	0.914526	0.92594
0.61239	0.627246	0.603383	0.649374	0.654204	0.602581	0.695042	0.649361	0.718209	0.676602	0.775608	0.789529	0.894731	0.943284	0.813024	0.846611	0.78467	0.875461	0.884295	0.838503	0.755292	0.695935	0.755603	0.712139	0.696721	0.749854	0.802855	0.738132	0.698634	0.689441	0.751018	0.738406	0.731795	0.660115	0.61073	0.671193	0.596004	0.591771	0.627376	0.578716	0.591345	0.721625	0.6903	0.617301	0.631162	0.575947	0.597664	0.632939	0.604196
0.0611177	0.111631	0.065888	0.0838723	0.121522	0.140355	0.181521	0.182872	0.19336	0.195271	0.20821		0.261525	0.300276	0.281979		0.282494			0.353904		0.444191	0.504444	0.467696	0.463005	0.489065	0.498789	0.501528	0.564615	0.608976	0.608012	0.625143	0.590612	0.616408	0.70254	0.701807	0.658129	0.665092	0.641597	0.599909	0.611443	0.573271	0.535616	0.415909		0.423239	0.40766	0.415156	0.642864	0.789653
4.17487	2.59549	1.65963		1.69602	1.71192	1.86708	1.89252		2.13794	2.63437	1.97641	2.02	2.02573	1.78551	1.75533	1.74156	1.61701	1.73238	1.48875	1.14299	1.24796	0.887871	1.49244	1.53946	1.47287	1.19843	1.35516	1.3338	1.24458	1.36307	1.26463	1.2816	1.28459		1.45358	1.15611	1.30917	1.30673	1.35645	1.22266	1.32801	1.26789	1.11084	1.20766	1.47139	1.54205	1.37776	1.53928	1.4066
1.02362	0.96673	1.09963	1.07089	1.10162	1.18832	1.24339	1.32581	1.45335	1.49142	1.76816	1.70479	1.77609	1.73568	1.82813	1.79852	1.69466	1.81235				1.83357	1.85881	1.42886	1.58884	1.63167	1.43817	1.24111	1.42053	1.44057	1.35789	1.45197	1.34497	1.15444	1.3281	1.41226	1.56095	1.52188	0.985223	0.989288	0.927383	0.859772	0.851291	0.754652	0.708102	0.679042	0.605565	0.620925	0.688146	0.625998
0.0902249	0.116797	0.120332	0.191996	0.208094	0.185138	0.258889	0.32457	0.240124	0.252059	0.266324	0.33445	0.378881	0.45977	0.530147	0.480989	0.432861	0.416115	0.348771	0.24459	0.348281	0.344014	0.342265	0.306471	0.249777	0.293958	0.325762	0.330975	0.423256	0.419825	0.486009	0.510611	0.424711	0.389684	0.388463	0.384894	0.386415	0.32426	0.349295	0.325123	0.33933	0.307752	0.317934	0.326794	0.297136	0.35707	0.38465	0.410652	0.369674	0.415161
1.19547	1.08531	1.02365	1.08355	1.02474	1.07079	1.09138	1.04023	1.05208	1.02419	1.06069	1.19829	1.09645	1.21623	1.20497	1.25621	1.14756	1.14112	1.40586	1.17713	1.2238	1.18588	1.09707	1.09541	1.20811	1.17605	1.0914	1.22702	1.29321	1.26897	1.25512	1.17543	1.21306	1.43456	1.41722	1.34228	1.5369	1.54815	1.39262	1.67835	1.37906	1.65509	1.78511	1.61467	1.44887	1.10903	1.18387	1.16685	1.06726	1.06874
0.961442	0.852245	0.778273	0.725628	0.728339	0.723998	0.701975	0.74485	0.713423	0.816997	0.751058	0.796674	0.621142	0.705306	0.810158	0.755175	0.711685	0.592478	0.528648	0.483029	0.514087	0.521776	0.486059	0.437746	0.420682	0.409412	0.378932	0.363182	0.541369	0.602044	0.649218	0.752852	0.828799	0.844504	0.911813	0.866715	0.886714	0.941879	0.889784	0.952267	0.883847		0.870382	0.888991	0.898777	0.997838	1.00168	1.04331	1.05862	1.08149
0.148691	0.236738	0.252057	0.296858	0.425491	0.595712	0.636359	0.658553	0.786524	0.905462	1.00577	1.01657	1.07693	1.08015	0.943792	1.09114	1.24504	1.12801	1.44148	1.32114	1.0325	1.00797	0.759869	1.00863	1.21273	1.37175	1.35779	1.64188	1.61574									0.713358	1.27998	1.65128			0.982533	0.865627	0.821134	0.689326	0.600473	0.627733	0.583216	0.649253
0.990545	0.921522	0.927258	0.943695	0.598658	0.568536	0.557671	0.574548	0.617869	0.630291	0.658881	0.658298	0.679006	0.688013	0.652168	0.642529	0.637281	0.636456				0.566332	0.543098	0.549724	0.578213		0.551813	0.63691	0.610404	0.599546	0.630301	0.601202	0.633336	0.575431	0.499468	0.415452	0.40942	0.329037	0.362142	0.390253	0.359944	0.375227	0.496835			0.381317	0.41324	0.432646	0.453665	0.448099
0.277244	0.378993	0.357678	0.384356	0.378793	0.373016	0.340621	0.34925	0.352232	0.367011	0.400578	0.373102	0.366477	0.392102	0.467989	0.438652	0.564939	0.488859	0.539406	0.551774	0.558411	0.574213	0.544971	0.498279	0.460897	0.422459	0.3961	0.373236	0.394544	0.457568	0.463476	0.51974	0.561806	0.562462	0.600767	0.59533	0.625943	0.602055	0.562767	0.686205	0.83341	0.695747	0.694683	0.665784	0.617222	0.572828	0.56844	0.58511	0.564438	0.547021
0.565309	0.51773	0.569796	0.662952	0.736369	0.803057	0.872004	0.993284	0.955509	1.03527	1.04326	1.05091	1.00507	0.969888	0.960651	0.897222	0.888613	0.795708	0.804653		0.803885	0.785293	0.730836	0.783413	0.769541	0.836576	0.849233	0.913687	0.939729	0.985787	1.00699	1.00364	1.08509	1.14623	1.15654	1.02158	1.06706	1.16156	0.983461	0.890259	0.819806	0.794102	0.768809	0.753382	0.813494	0.816573	0.860146	0.884097	0.935472	0.923616
0.310136	0.306481	0.402608	0.578719	0.684059	0.708716	0.770067	0.701153	0.759778	0.823657	0.773362	0.651282	0.64448	0.620371	0.676804	0.637758	0.649205			0.608596	0.528268	0.561338	0.582582	0.550429	0.577043	0.548365	0.56507	0.607791	0.750328	0.761085	0.757166	0.864915	0.904061	0.937647	0.905916	0.915917	0.890696	0.824277	0.827927	0.795859	0.74303	0.780467	0.737783	0.673478	0.699149	0.665217	0.633882	0.607794	0.604827	0.589949
1.46158	1.32032	1.28137	1.16747	1.12853	0.951439	0.88747	0.905845	0.801462	0.853578	0.735879	0.823732								0.868307	0.617043	0.671759	0.545633	0.54738									0.788553	0.755599	0.719571	0.864878		0.797291	0.712218	0.745418	0.826869	0.86628		0.866547	0.928898	0.909734
1.50201	1.52652	1.58705	1.44873	1.49345	1.50402	1.37961	1.38636	1.36465		1.30866	1.329	1.32582	1.28441			1.47593	1.67002		1.67143	1.83211	1.95455		1.91229	1.8464	1.81424	1.85008	1.72479	1.61049	1.52891	1.60132	1.53257	1.58165	1.73667	1.48808	1.72804	1.69242	1.56837	1.25428	1.06365	1.4629	1.79977	1.4674	1.14689	0.808853	0.823451	0.721723		0.74078
0.655947	0.707387	0.678983	0.67811	1.45513				0.564377	0.620104	0.528531	0.558034	0.522523	0.514605	0.54193	0.468634		0.62895	0.662529	0.478588	0.477501	0.460918				0.700502				5.25271	4.40291	3.13472	2.97786	2.30623	1.90203	1.72856	1.57704	1.9297	1.62021	1.58236		1.3091	1.6691		1.29073		1.32921	1.29593	1.16093	1.13204
0.783242	0.855305	0.999689							1.03838	0.844953	0.886076	0.974407		1.12052	1.20944	1.22172				1.37577	1.12221	0.979141		0.920911	0.881871	0.841667	0.899766	0.935507	0.968065	1.0722	0.959332	0.702281							1.54187	1.58763	1.52774		1.80289	1.6446	1.36864	1.99453	1.51927	1.74859	1.80776
1.06201	1.03597	1.04925	1.06745	1.07671	1.22915	1.05748	1.17955	1.14563	1.1963	1.17845	1.36327	1.37784	1.26891	1.31448	1.36887	1.41111	1.37118	1.25776	1.36925	1.19571	1.2547	1.19547	1.0331	1.1056	1.10165		0.992846				1.07428	1.08376	1.09481	1.11545	1.19967	1.12525	1.13893	1.25805	1.29817	1.34102	1.25186	1.20508	1.15166	1.1199	1.06054	1.00135	0.931184	0.945031	0.954141
1.29951	1.13934	1.19418	1.2876	1.2421	1.2587	1.21259	1.19427	1.04963	0.91264	0.855781	0.803382	0.738165	0.772024	0.751314	0.792106	0.787788	0.768301	0.798818		0.810741	0.821054	0.914846	0.982038	0.924328	0.940984	0.874396	0.882968	0.859641	0.790454	0.775649	0.701931	0.732178	0.718208	0.709334	0.693305		0.935082		1.0518	1.28089	0.891177	1.2343	1.19939	0.632104	1.04879	0.851022	0.953147	0.847364	0.870692
0.223654	0.153727	0.157562	0.1587	0.132398	0.116068	0.112395	0.141641	0.140995	0.159429	0.186116	0.235017	0.24374		0.309842		0.305578	0.316201	0.305584	0.371986	0.325344	0.322072	0.274125	0.250985	0.223377	0.232524	0.253101	0.287004	0.269755	0.217622	0.220999	0.206397	0.224149	0.208113	0.227596	0.248546	0.246481	0.221486	0.17732	0.160018	0.167591	0.174501	0.161072	0.161993	0.173361	0.161457	0.169519	0.189444	0.227058	0.171243
0.191304	0.205937	0.215721	0.239153	0.233501	0.297616	0.321236	0.313972	0.346345	0.331062	0.314704	0.446353			0.363393	0.307515		0.226978	0.224725			0.209939	0.160583	0.188983	0.185319	0.194147	0.207704	0.217727	0.279922	0.336726	0.323881	0.383262	0.367468	0.463896	0.47443	0.545894	0.536887	0.59312	0.58984	0.582703	0.524131	0.44514	0.443451	0.371286	0.35467	0.259953	0.291578	0.254745	0.221918	0.320778
0.144328	0.147289	0.162588	0.170687	0.21375	0.264331	0.313818	0.320407	0.359119	0.333424	0.311229	0.336046	0.347423				0.436966			0.597278	0.608779	0.573222	0.599037	0.687224	0.799693	0.935954	1.04058	1.31198	0.750603	0.499156	0.541481	0.481108	0.413495	0.402528	0.500021	0.590564		0.637707	0.64618	0.670244	0.623158	0.623326	0.466026	0.425966	0.341582	0.29378	0.318113	0.253932	0.29037	0.308964
0.390431	0.455579	0.496563	0.576603	0.687907	0.825817	0.968096	0.961367	0.941746	0.939172	0.994718	0.941987	0.969593		0.986613		1.109		1.12186		1.14838		0.999202	1.06991	1.05192		1.15122	1.11877	1.18436	1.27455	1.26495	1.32662	1.25001	1.16498		1.01755	0.996846	0.982344	0.921594	0.960803	0.982253	0.967213		0.882924	0.929795	0.964941		1.01658	1.0552	1.02756
0.486901	0.510777	0.409059	0.395925	0.399805	0.45307	0.470619	0.56395	0.61362	0.622665	0.580973	0.691995	0.601197	0.734411	0.70623	0.716055						0.893228	0.941477	1.05431	1.11347	1.3336	1.58645	1.5697	1.73942	1.92001	1.9362	1.93322	1.9086	1.93767	1.94573	1.81101	1.89664	1.62263	1.78301	1.80043	1.61018	1.54943	1.32897	0.893834	1.23657	1.07487	0.911799	0.782231	0.933176	0.893557
0.245337	0.326904	0.443436	0.580715	0.646307	0.696441	0.789984	0.851044	0.81945	1.01757	1.05832	1.11532	1.17641	1.12078			1.28962	1.07646					1.14003	1.04754	1.10199	1.02841	1.19739	1.27103	1.36822	1.39332	1.42694	1.31759	1.68977			1.66251		1.77576	1.65298	1.61622	1.52885		1.2687	1.15661	1.03864	0.910881	0.852863	0.771835		0.705129
0.312515	0.328032	0.345805	0.343093	0.35165	0.348222	0.402474	0.400207	0.380929	0.429357	0.478218	0.560549	0.55704	0.631003	0.633866	0.702661	0.639752	0.752379	0.827736	0.815827	0.764151	0.802742	0.793654	0.756504	0.81332	0.830773	0.958708	1.0942	1.11891	1.00562	0.793749	0.848345	0.710059	0.839025	0.842588	0.698017	0.663305	0.551179	0.525935	0.516345	0.495469	0.630608	0.685987	0.747152	1.05258	1.54225	1.87422	1.80159	1.78611	1.71587
0.630215	0.621164	0.691955	0.710687	0.716975	0.840302	0.961881	1.05582	1.04437	1.17528	1.28629	1.34663	1.30315					0.738268				0.628899	0.493722	0.470148	0.455424	0.45432	0.435258	0.386367	0.448617	0.50827	0.492546	0.491467	0.530703	0.461978	0.527682	0.513715	0.623251	0.666285	0.724652	0.701182	0.710929	0.697206	0.620484	0.569503	0.58106	0.554336	0.563413	0.584536	0.564564	0.656192
0.339116	0.339807	0.403391	0.467961	0.523061	0.479605			0.602955	0.619293	0.673432	0.442291						0.517539		0.538672	0.535945	0.468767	0.450351	0.452375	0.419696	0.48315	0.479108	0.506507	0.505719	0.54638	0.508676	0.523068	0.546727	0.570456	0.587356	0.534496	0.590916	0.547347	0.566888	0.574287	0.508711	0.506632	0.488339	0.517415	0.495957	0.508669	0.547617	0.577425	0.616371	0.597179
0.938737	0.864284	0.828214	0.812109	0.772059	0.748844	0.713275	0.612384	0.600466	0.60814	0.586488	0.578121	0.640901	0.641565	0.731606					0.691424			0.716913	0.647587	0.758065		0.76365	0.770712	0.676322	0.697107	0.722238	0.708603	0.789564	0.845319	0.828454	0.904016	0.904937	1.0481	1.00986	1.05999	1.10246	1.02319	1.07539	1.09063	1.09943	1.20836	1.21774	1.24589	1.19158	1.05248
0.157622	0.109936	0.105662	0.164686	0.139154	0.107821		0.251032	0.222846			0.265901	0.207668	0.121739						-0.0132872		0.0899287	0.0823448	0.0197816	0.0905098	0.0500709	0.0905575	0.12172	0.100765	0.139785	0.151957	0.15409	0.156131	0.106743	0.16902	0.252519	0.345342	0.384471	0.290445	0.254131	0.265886	0.263084	0.282541	0.272781	0.255354	0.398844	0.365309	0.331874	0.358129	0.399708
3.01768	3.03118	2.92743	1.75462	1.42186	4.49608	0.735269	0.620947	1.00608	3.70952	5.56461	6.2203	1.38215	1.74898	2.73007		2.35822	3.05735	6.50092	0.323003	0.973528	0.659388	1.35822	1.77467	2.3285	3.06544	3.08776		2.74596		1.7236	1.71588		1.44822		1.99091	1.64636	1.69581	2.10688	1.35804	3.29035		2.69046	3.65061	3.60618	3.12111	3.71712	1.67729
0.546106	0.528566	0.519357	0.490922	0.529168	0.53213	0.545792		0.656373					0.860623		0.792128	0.794496	0.875605							0.81764	0.807984	0.900263		0.808076		0.724545	0.835396	0.816669	0.79768	0.753689	0.733857	0.760478	0.810261	0.776349	0.796294	0.782643	0.736894	0.814484	0.778222	0.858716	0.861132	0.862677	0.843804	0.99608	0.948023
1.46531	0.793976	0.710617	0.825701	0.720821	0.54496	0.738921	0.396648	0.513349	0.634522	0.970629	1.16064	1.15298			1.33585	1.00802	1.21324		1.06388			1.60973	1.62094	1.79442							0.889962	1.28954		0.925168	0.781264	0.678492		0.965071				0.792551	0.764998	0.770429	0.826124	0.800375	0.828161	0.769721	0.842958
	1.58483	1.25174	1.31045	1.25084	1.15531	1.1843	1.14885	1.24514	1.16253	0.972186	0.961931	0.949195	0.960418	1.15821	1.19245		1.22217		1.40458	1.46922	1.5657	1.47506	1.43603	1.22436	1.26339	1.17102	1.30894	1.39469	1.51905	1.53454	1.4852	1.532	1.73721	1.66168	1.6712	1.49499	1.28816	1.39263	1.18095	1.11503	1.06864	1.04546	0.955542	0.926437	0.923673	0.966415	1.00782	1.05293	1.06014
	1.00559	1.13387	1.20164		1.38843		1.41297	1.54194	1.37403	1.39597	1.35439	1.13184	1.14931	1.10233	1.07346	1.12063	1.18392		1.18923	1.28152	1.33148	1.45598	1.37856	1.49281	1.52293	1.49841	1.48334	1.36116	1.40109	1.40838	1.40753	1.45597	1.49435	1.5345	1.48683	1.46526	1.46413	1.43149	1.52108	1.49434	1.41884	1.34941	1.24116	1.20375	1.10519	1.06638	1.04841	1.05601	1.07054
	0.381076	0.401441	0.445719	0.502587	0.480105	0.496076	0.501183		0.461464	0.447431	0.453532	0.412426	0.374174		0.574719		0.502611			0.445046	0.459986	0.498885	0.459377		0.436873	0.477038	0.471279	0.493866	0.506392	0.531959	0.577391	0.580458	0.634603	0.68533	0.696959	0.71722	0.754442	0.7448	0.711596	0.728479	0.803496	0.798626	0.759029	0.717629	0.761865	0.752543	0.662832	0.629849	0.497784
	0.939717	0.940741		0.996902	0.89192	0.855606	0.844804	0.820538	0.934277	0.870425	0.959421	1.02504	0.958853	1.05933	1.12665	1.20974	1.27411	1.27462	1.3261	1.27008		1.22839	1.23778	1.27195	1.29275	1.20166				0.981602	0.985788	0.955376	1.04891	0.924975	0.907004	0.842809	0.891289	0.911237	0.853396	0.792616	0.878505	0.995265	1.03033	1.00892	0.971161	0.977464			0.989642
	0.602624	0.664217	0.743974	0.733515	0.777857	0.864291	0.974863	1.00726	0.902947	0.910506	0.844364			0.89454	0.848187	0.857249			0.813934						0.85404	0.836583	0.915994	0.937288	0.88656	0.907261	0.962917	0.974305	1.00057	0.971321	0.882298	0.881392	0.965748	0.982005	0.885259	0.882747	0.892148	0.904709	0.902505	0.823752	0.784795	0.742817	0.71576	0.697913	0.745278
	1.05086	1.04063	1.18949	1.22074	1.07857	1.0762	1.09972	1.0125		1.00642	1.02092	1.05398	0.977271	0.958691	1.00764	0.909798	0.951177	0.99213	0.908614	0.87554	0.821105		0.791203	0.941722	0.880949	0.921876	0.920558	1.08011	1.21737	1.32986	1.48165	1.49191	1.54819	1.52164	1.49987	1.51083	1.46975	1.56846	1.4852	1.633	1.56579	1.49039	1.43297	1.60648	1.52543	1.55952	1.55186	1.52921	1.41372
	0.890914	0.93305	0.944228	0.97052	1.07462	1.07688	1.03462	1.10729		1.08798	1.21282		1.2211	1.09375	1.16904	1.19713	1.25379	1.18187	1.22501	1.13953		1.03483					0.707411	0.644869		1.00929	1.03424	1.03396	1.05447	1.04943	1.07869	0.962429	0.965063	0.93572	0.888437	0.871746	0.810646	0.711403	0.64708	0.628137	0.622209	0.632967	0.623733	0.615832	0.62013
	0.965589	1.04915	1.12264		1.31245	1.36811	1.5616	1.63941	1.67616	1.68721	1.44216	1.46565			1.29377			1.29755			1.2487	1.29428	1.19566	1.2302	1.22397	1.20624	1.19117	1.27719	1.57808	2.29924	0.836644	0.886526	0.938224	0.853759	0.772039	0.791857	1.03996	1.6496	2.033	1.90728	1.68193	1.46966	1.29996	1.17388	1.13116	1.1724	1.13627	1.2338	1.18274
	0.578174	0.579918	0.638592			0.797462	0.749367	0.724971	0.680952	0.642466	0.59436	0.53509	0.537145	0.475952	0.482958	0.466492	0.469181	0.482028	0.495914	0.452352	0.456243	0.476231	0.43846	0.443562	0.524504	0.475018	0.471985	0.556221	0.525511	0.530966	0.509675	0.520796	0.50081	0.435737	0.444041	0.441663	0.411892	0.391569	0.390061	0.430268	0.378661	0.361126	0.361279	0.33595	0.335293	0.326584	0.351435	0.372814	0.370891
	2.81308	2.00707	3.13195	2.79986	2.71655	2.88766	4.33159	3.18584	2.70708	2.51603	2.28846	2.26728	2.49083	2.31536	2.16371	2.18035	1.87922	1.67967	1.64189	1.4944	1.40519	1.48727	1.48691	1.43652	1.60873	1.66807	1.6965	1.7285	1.67747	1.74086	1.81008	1.98716	1.78261	1.92346	1.70574	1.71857	1.62958	1.59445	1.42657	1.5514	1.47697		1.20497		0.904355	0.923425	0.680581	0.64168	0.795271
		1.80049	1.73134	1.46768	1.55045	1.62339	1.83276	1.82518	2.46832	1.87843	2.55556	2.18453	2.44036	2.29902	2.51639	2.38344	2.13566	2.04919	1.78414	2.14571	2.28007	2.35156	1.94532	1.70683	1.58683	1.44675	1.35443	1.30116	1.3127	1.34855	1.26574	1.26235	1.23525	1.23349	1.23215	1.093	1.06654	0.987768	0.980678	1.01745	0.944003	0.989073	0.977646	0.937264	1.03512	0.968871	0.976259	1.005	1.02387
		0.918936	0.965627	1.03601	1.08278	1.16291	1.14765	1.20994			1.1683	1.08282	1.12988	1.00191	1.04286	1.02919	1.15175	1.17617	1.14802	1.26231	1.22497	1.17432	1.10359	0.998648	1.02977	0.950844	0.864432	0.981447	1.04905	1.04693	1.12991	1.10482	1.03404	1.03369	0.979477	0.991513	1.01088	1.10815	1.06376	1.03575	1.06434	1.15969	1.22513	1.35734	1.39808	1.37838	1.48789	1.51382	1.51935
		1.07231	1.18398	1.16758	1.26329	1.28202	1.22417	1.19483	1.1875	1.08473	1.08452	1.16783	1.15222	1.10246	1.22508	1.21048	1.2537	1.27305	1.3263	1.31706	1.36411	1.50652	1.42648	1.66348	1.66515	1.81927	1.98136	2.06067	1.93364	0.837915	0.258076	0.224445	0.367148	0.750467	0.819514	1.39837	2.15911	1.80439	1.59978	1.72992	1.65085	1.52671	1.52978	1.51662	1.73123	1.55749	1.60945	1.36354	1.43713
		1.0512	1.14826	1.23426	1.14004	1.2159	1.24597				1.3914	1.39228	1.25547	1.32853	1.32807	1.27641	1.26463	1.20984	1.31814	1.2739	1.2591	1.20485	1.16247	1.16427	1.08515	1.06586	1.03472	1.07512	1.01721	1.03215	1.07655	1.06558	1.05806	1.05377	1.09163	1.26823	1.47207	1.44787	1.30426	1.30124	1.15018	1.01419	0.914901	0.819462	0.75323	0.701544	0.668647	0.67626	0.623057
		0.856675	1.12587	1.18949	1.18864	1.12492	0.879748	0.753805	0.618835	0.592884	0.571197	0.616521	0.641803	0.691286	0.730406	0.722076	0.779559	0.823555	0.866002	0.858453	0.929211	0.930054	0.906959	1.00153	0.990109	0.991706	1.10717	1.19398	1.27743	1.30776	1.27205	1.38065	1.29834	1.26838	1.29489	1.36796	1.32756	1.34825	1.36013	1.42239	1.34097	1.24478	1.21969		1.13417	1.16327	1.11552	1.10719	1.15214
		0.51256	1.52458	1.73481		2.12307	2.16497	2.29565	2.73645	3.0535	3.40062	3.55687	3.67328	3.06152	3.10283	3.16324	3.04972	3.0143	2.86922	2.88245	2.8681	2.54319	2.80648	2.74444	2.63293	2.74811	2.79888	2.99162	2.70082	2.9415	2.58701	2.46069	2.81276	2.54758	2.5264	2.5651	2.4249	2.24588	1.99449	2.07173	1.95958	1.89502	1.8711	2.13638	1.74602	1.78946	1.88228	1.94883	1.83374
		2.36556	1.75555	1.871	1.30012	0.951138		1.38249		1.40777	1.34434	1.22002			0.748695						1.09851	1.13926	1.28093			1.22945	1.74754			1.292	1.20343	1.36563	1.3808	1.46179	1.53166	1.37779	1.45771	1.22298	1.44745	1.29881	1.27325	1.20598	1.25535	1.25238	1.20633	1.07671	1.10797	1.16336	1.19819
		1.42105	1.64152	1.32034	1.16703	1.05671	1.15568	1.1326	1.91887				2.23876				1.68339	1.48556	1.57512	1.2025	1.2387	0.98826	0.967826	0.852899	0.735386	0.781679	0.807133	0.730325	0.745223	0.719479	0.681447	0.509937	0.635071	0.637736	0.697245	0.640263	0.761356	0.655927	0.663483		0.869735	0.804667	0.952709				0.688429	0.662059	0.693026
		0.332134	0.358513	0.373767	0.421333	0.41507	0.432299	0.48289	0.500918	0.435179	0.444612	0.484197	0.452271	0.491925	0.589764	0.537464			0.641861	0.606712				0.73107		0.755163	0.820582	0.720414	0.728245	0.781527	0.848238	0.833328	0.908554	0.91656	0.892065	0.867942	0.822887	0.810115	0.825983	0.788808	0.792207	0.765763	0.785311	0.794693	0.811788	0.796739	0.810445	0.861612	0.931972
		1.06574	1.37132	1.39734	1.44747	1.59129	1.77676	1.64135				1.21026	1.17527	1.21859	1.24386	1.20237	1.15802	1.17751	1.15412	1.25389	1.16786	1.21124	1.16005	1.24188	1.22618	1.27099	1.37663	1.36437	1.35257	1.38711	1.35428	1.41617	1.48078	1.62147	1.70198	1.72093	1.86258	1.81795	1.86681	1.61936					1.1393	1.00984	0.941407	1.13974
			1.29203	1.56906	1.70292	1.65721	1.54995	1.31614	1.14188	0.894934	0.859889	0.830235	0.796195	0.769605	0.858658	0.849916	0.969103	1.03325	1.14183	1.23396	1.17125	1.21313	1.30207	1.1564	1.15677	1.11447	1.00666	1.18705	1.24658	1.29169	1.38481	1.39323	1.51047	1.47952	1.56568	1.59121	1.59179	1.58396	1.6801	1.74594	1.73257	1.78782	1.76971	1.71282	1.73555	1.78202	1.77061	1.65324	1.57324
			0.911731	0.7774	1.00783	1.10713			2.2332	1.8862	1.75924	1.86083	1.60754	1.35142	1.96765	2.01035	1.51729	2.33076	1.96323	1.75478	2.55189	2.25682	3.11909	3.27822	2.88044	3.14488	3.2557	3.33159	3.37914	3.00391	3.18061	3.81742	3.407	3.30757	3.14955	2.9916	2.83644	2.72981	2.53583	2.43911	2.23735	1.88706	2.24754	2.00202	2.27651	2.51629	2.65736	2.56913	2.8819
			1.58481	1.6442	1.55558	1.57119	1.42497	1.31049	1.50768	1.40211	1.58992	1.48304			1.14246	1.27588	1.63978	1.30957	1.58088	1.46674	1.58958	1.47115	1.33976	1.6296	1.84781	1.93508	1.84813	2.01891	2.22764	1.76843	1.97463	1.72727	1.35373	1.7169	1.79005	1.5911	1.86626	1.72794	1.95384	1.85721	1.8791	1.85452	1.8225	1.80394	1.78678	1.79883	1.96398	2.06508	1.97528
			0.448506	0.459662	0.524547	0.435586	0.548734	0.496019	0.554744	0.591587	0.68699	0.648867	0.681815	0.647439	0.668448	0.740002			0.908104		0.884069	0.958967	0.964081	0.951936	0.963282	0.901099	0.852137	0.864801	0.872419	0.830939	0.813027	0.806412	0.79182	0.827883	0.800135	0.791404	0.788164	0.775482	0.828687	0.890294	0.995876	0.960813	1.01534	1.02171	1.01661	1.07332	1.08181	1.07322	1.12944
			0.996656	0.722509	0.605812	0.456774	0.42983	0.394912	0.479629	0.526071	0.48309	0.563331	0.714811	0.705202	0.764141	0.927024			1.14082	0.963426	0.830804		0.925603	1.01052	0.70568	0.920791	0.80744	0.968649	0.784918	0.812043	0.73624	0.724382		0.806653	0.814758	0.869101	0.875234	0.819562	0.786603	0.758447	0.645099	0.623309	0.578352	0.593726	0.54875	0.575182	0.632209	0.629511	0.5978
			1.21691	1.35412	1.41774	1.516	1.36105	1.184		1.10175	1.00611	1.02742	1.03845	0.95228	0.98479	0.986792	1.00166	1.0419	0.997618	0.878254	0.885373	1.10878	0.877686	1.26368	1.40493	1.38225	1.40206	1.48359	1.40966	1.31516	1.21551	1.28436	1.19222	0.909546	1.11814	0.892237		0.830403	0.884944	1.02662	1.01801	0.931573	0.864178	1.08182	1.23576	1.27132	1.1722	1.47783	1.25954
			0.60258	0.636568	0.677448			0.61176	0.767159			0.907688	0.891703	0.913688	1.14242	1.07761	1.22667	1.085	1.16965	0.966441	1.17782	0.934088	0.875604	0.869695	0.865965	0.793233	0.756746	0.599411	0.619244	0.598678	0.66606	0.593425	0.653284	0.637818	0.646021	0.655728	0.601809	0.653381	0.623626	0.661183	0.63564	0.688686	0.706958	0.702922	0.721585	0.748055	0.728683	0.839282	0.930603
			0.404982	0.79412	1.03324	0.754622	0.83324	1.11417	0.89251	1.03873	1.0827	1.07176	1.00027	1.0137	0.997509	1.0857	1.16837	1.27902	1.41518	1.35706	1.28289	1.14793	1.0798	1.04281	1.01605	0.964209	0.956192	0.899649	0.877292	0.86691	0.851286	0.801047	0.752751	0.806116	0.769349	0.764107	0.769443	0.796615	0.866714	0.881441	0.84361	0.776635	0.764179	0.7768	0.766738	0.764735	0.786577	0.80314	0.82391
			0.45193	0.472085	0.581777	0.608904	0.585178	0.722326	0.6578	0.728644	0.683189	0.673596	0.666628	0.908978	1.01026	1.10318	1.19256	1.27861	1.2109			1.6756	1.79125	1.58836	1.79669	1.77101	1.65599	1.72452	1.60682	1.46283	1.46973	1.32669	1.03909	1.25038	1.00509	0.989179				0.899838	0.918595	0.84963	0.666845	0.8625	0.616907	0.648383	0.706838	0.733716	0.667067
				0.553957	1.04306	1.2348	1.42214	1.36515	1.03142	0.854452	0.782906	0.766005	0.83736		0.949199	0.916014	0.955149	1.00333	0.953614	0.920167	0.94886	0.896482	0.839438	0.785633	0.782622	0.758716	0.788042	0.742563	0.823564	0.840049	0.777073	0.727699	0.669474	0.733483	0.747091	0.786954	0.785136	0.811021	0.797815	0.793508	0.740565	0.699774	0.651903	0.659004	0.690701	0.757534	0.817068	0.85022	0.856279
				1.05149	1.18582	1.18696	1.0743	1.16202	1.24508	1.24408	1.38372	1.45262	1.58226	1.6374	1.6271	1.60793	1.55293	1.50001	1.48591	1.54333	1.50723	1.54004	1.63024	1.59367	1.52854	1.50101	1.52647	1.52477	1.59391	1.54313	1.48198	1.45077	1.49177	1.4495	1.44081	1.44038	1.42676	1.39771	1.42832	1.35535	1.33813	1.2863	1.2745	1.24897	1.23557	1.20983	1.17686	1.16359	1.18416
				1.42624	1.72429	1.52752	1.44893	1.47585	1.47348	1.52611	1.33221	1.20747	1.36253		1.35414	1.16202	1.17069	1.27455	1.27576			1.2039	1.31012	1.26052	1.34977	1.63095	1.62948	1.06542	1.03525	1.09297	1.03492	1.00695	0.901643	0.879219	0.847926	0.777821	0.822706	0.817576	0.807881	0.95211	0.793701	0.852327	0.775482	0.938602	1.01375	0.935573	0.791413	0.869933	0.881764
				0.360327	0.35626	0.27039	0.270162	0.324055	0.392013	0.393159	0.521297		0.427103			0.368272	0.249885	0.217551	0.202907	0.220346	0.200954	0.262793	0.287113	0.268146	0.271767	0.233356	0.225332	0.195408	0.206704	0.218352	0.190004	0.221837	0.228485	0.229711	0.284255	0.28657	0.269766	0.303262	0.294524	0.286849	0.327413	0.31864	0.331826	0.282293	0.299309	0.303967	0.310203	0.255133	0.215156
				1.07486	1.12049	0.853274	1.14193	1.07955	1.11516	1.2005	1.1607			1.27907	1.18828	1.27537	1.36159	1.22996	1.27877	1.16603	1.23429	1.11036	1.06465	1.02961	1.05772	1.1847	1.21894	1.33285	1.28361	1.35986	1.38422	1.45405	1.60855	1.86196	1.98511	2.09371	0.726602	0.511978	0.62209	0.51873	0.390074		0.308964	0.427736	0.574596	0.691735	0.719376	0.813208	0.87046
				0.834736	1.37967	1.37827	1.44527	1.38521	1.36807	1.31528	1.31441	1.45047	1.7205	1.84367	2.15562	2.25565	2.38657	2.27428	2.16705	1.94341	1.9202	1.92912	1.71905	1.60599	1.5556	1.40024	1.49051	1.42967	1.47421	1.46173	1.41161	1.41653	1.39786	1.50426	1.51933	1.55245	1.50743	1.54091	1.59191	1.67235	1.61641	1.52518	1.60702	1.75545	1.84707	1.78223	1.61581	1.59508	1.07859
				0.624416	0.487642	0.468986	0.4527	0.361281			0.416003	0.393755	0.420544	0.388438					0.49527		0.530726	0.548195	0.467837	0.485521	0.47894	0.457326	0.436692	0.390416	0.361221	0.38814	0.37158	0.407038	0.443099	0.483431	0.532564	0.574654	0.646116	0.677201	0.731234	0.765239	0.786477	0.749034	0.726962	0.739806	0.742785	0.761661	0.736838	0.76121	0.777719
				1.23938	1.29448	1.40482						1.05187	1.01535	0.811675	1.05702	0.825391	1.14421	1.00052	1.20097	1.2873	1.26868	1.27567	1.24449	1.193	1.23695	1.16987	1.27182	1.30925	1.42231	1.421	1.48772	1.43192		1.50265		1.61326	1.60009	1.60926	1.63906	1.55285	1.70179	1.5631	1.47683	1.4715	1.46694	1.48805	1.41384	1.4833	1.51013
				1.00603	1.08727	1.05851	1.05868		1.26446	0.884958	0.906472	0.682961	1.00642	0.903185	1.15677	1.13443	1.03005	1.11386					0.911698		0.899667	0.921217	0.862622	0.889421	0.9483	0.931917	0.906432	0.813056	0.71097	0.760074	0.751964	0.790056	0.823265	0.860447	0.840639	0.758065	0.803755	0.846621	0.89311	0.86906	0.873202	0.922202		0.93045	0.932135
				1.04213	1.03699	0.972501	0.947134	1.07868	0.99142	0.866841	0.843887	0.791413	0.839127	0.861769	0.799697	0.764671	0.801133	0.756904	0.893217	0.94339		0.789043				0.916445	0.853964	0.825912	0.814097	0.822171	0.799477	0.778948	0.801223	0.789163	0.826841	0.861498	0.854939	0.840365	0.820244	0.846613	0.868119	0.791521	0.750322	0.730645	0.734039	0.778697	0.775105	0.821013	0.828051
				1.14718	1.16581	1.13356	1.17092	1.14953	1.00746	1.01407	1.02168	1.02754	0.976783	1.07762	1.10654			1.08715	1.17435		1.0529	1.05056	0.994724	1.02903	1.0079	1.00319	1.09984	1.08306	1.09635	1.17928	1.16288	1.12043	1.07568	1.03989	1.0307	1.03714	1.02191	1.0269	0.973843	1.02036	1.03965	1.07274	1.15246	1.11038	1.08416	1.1073	1.05073	1.0692	1.08322
				0.842249	0.90068	0.898511	0.992263	1.12826	1.1583	1.2519	1.22586	1.24055	1.37535	1.52916	1.5092	1.49639	1.43782	1.46033	1.4165	1.37962	1.34286	1.27042	1.31736	1.34568	1.36163							1.26453	1.15791	1.073	1.08885	1.15006	1.23221	1.23371	1.25447	1.18	1.11306	1.05598	0.995316	0.963653	0.931595	0.872527	0.829794	0.797659	0.757183
				0.960677	1.4412	2.86874							1.14681	0.755878	0.912735	0.841768	0.996189		0.952368	1.05403			0.94812		0.857767	0.911141	0.869195	0.717304	0.744777	0.727997	0.699702	0.664508	0.638133	0.672483	0.692222	0.659994	0.704743	0.758995	0.645505	0.805117	0.776146	0.836663	0.741165	0.967604	0.885491	0.816064	0.839114	0.896213	0.962676
				0.408619	0.404701	0.456289	0.400527	0.374886	0.333913	0.366751	0.404777	0.439747	0.488192	0.457041	0.506119	0.449056	0.475643	0.484447	0.467461	0.508502	0.529557	0.536412	0.566826	0.613957	0.537658	0.523165	0.490015	0.513639	0.5231	0.533645	0.552349	0.556542	0.574128	0.558493	0.570635	0.552847	0.546148	0.46978	0.414778	0.403243	0.351545	0.339884	0.365001	0.333953	0.296508	0.277258	0.355443	0.343817	0.382545
				1.39017	1.46768	1.65572	1.51794			1.69948	1.82443	1.89712	2.86261	2.83714	3.09729	2.07454	1.6618						0.973552	1.19083	1.26869	1.19239	1.18147	1.21011	1.39619	1.70877	1.59563	0.767676	0.775091	0.689586				1.4546	1.61252		1.4958	1.58155	1.56204	1.75923	1.74611	1.65141	1.51556	1.36136	1.15514
				0.541899	0.727917	0.394253	0.497657	0.480902		0.551146	0.571782			0.905219	0.945129	0.970411	0.98992	0.963572	0.913444	0.883776	0.808317	0.749872	0.770732	0.711544	0.720996	0.670011	0.720615	0.654067	0.69007	0.659164	0.652156	0.651184	0.636857	0.607804	0.605782	0.658617	0.623074	0.800246	0.838545	0.890921	0.891952	0.893307	0.905489	0.851175	0.784561	0.719011	0.659287	0.697692	0.675059
				0.428296	0.391771	0.410362	0.458887	0.637392	0.631607	0.657276	0.680199	0.642421	0.524891	0.491961	0.659971	0.735308				1.03118	0.604799	0.652082	0.627884	0.599954	0.602817	0.613556	0.65104	0.682793	0.626707	0.586739	0.590275	0.496955	0.424225	0.430753	0.435451	0.501426	0.466181	0.462432	0.446595	0.49834	0.46883	0.476057	0.458516	0.478025	0.514729	0.485396	0.404786	0.362224	0.35244
				1.73228	1.57938	1.42722	1.5516	1.54796	1.48315	1.49807	1.56927	1.45125		1.27164		1.24759		1.14125	1.15577	1.10903	1.12495	1.03357	1.11949	1.14608	1.16659	1.1672	1.2342	1.28376	1.20458	1.08877	1.07838	1.0544	1.14742	1.17735	1.18336	1.21692	1.17773	1.27007	1.39195	1.63114	1.78656	2.02988	2.49891	0.910187	0.687531	0.620295	0.551161	0.380164
				2.18049	2.0715	1.95341	2.00411	1.91866	2.08101	2.19429	2.49233	2.94623	3.11023	2.45044	2.97378	2.46356	2.76396	2.56748	3.23722	2.9249	2.33849	2.30793	2.40186	2.11956	2.35481	2.0772	2.13242	2.25212	2.30619	2.52343	2.65034	2.81833	2.80588	2.43748	2.62241	2.19658	2.07824	1.77466	1.90006	1.78971	1.77796	1.78551	1.69345	1.87367	1.94146	1.85264	1.69158	1.97703	1.85517
					0.625793	0.619234	0.519354	0.701588	0.96747	1.30616	1.40429	1.30261	1.05534	1.15855	1.19568	1.19089	1.14615	1.09933	1.28295	1.20387	1.05702	0.997574	0.968567	0.953154	1.09462	0.970074	1.04955		1.16031	1.04129	1.04498	1.1468	1.08211	1.15505	1.10056	1.20826	1.18388	1.24205	1.26738	1.24024	1.33433	1.22401	1.16573	1.07085	1.07865	1.10813	1.18076	1.12803	1.20378
					0.684303	0.661154	0.623081	0.708857	0.640211	0.619706	0.654888	0.691211	0.758419	0.568861	0.398929	0.453966	0.569926	0.550867	0.303336	0.328944	0.323822	0.321626	0.262254	0.253012	0.293268	0.332926	0.283383	0.284746	0.317653	0.579898	0.294497	0.43753	0.59018	0.447871		0.737113	0.509117	0.517847	0.435362	0.439665	0.44514	0.403079	0.401499	0.447588	0.421019	0.398407	0.382561	0.376012	0.372362
					1.78813	1.64699	1.60888	1.70335	1.71997	1.61351	1.63578	1.58485	1.61999	1.62974	1.51328	1.60088	1.4919	1.49059	1.1995	1.33578	1.30131	1.30425	1.35045	1.36741	1.35282	1.46736	1.50811	1.47852	1.62282	1.60478	1.5401	1.54676	1.65149	1.66191	1.80104	1.7859	1.72659	1.81612	1.81937	1.83377	1.86562	1.78815	1.78221	1.71438	1.67137	1.77915	1.71829	1.611	1.65189
					0.180109	0.143494	0.352529		0.385142	0.390981	0.431169	0.502746	0.438358	0.518373	0.472712	0.578928	0.534832		0.675196	0.575106	0.526883	0.523749	0.503781	0.743127	1.05308	0.742853	0.719874	0.687788	0.920727	0.807011	0.787999	0.666855	0.685012	0.611104	0.387098	0.381652	0.24784	0.280417	0.382817	0.329825	0.409058	0.432267	0.406127	0.4527	0.514094	0.426566	0.492036	0.539012	0.61299
					0.902574	1.00781	1.09076	1.16342	1.16955	1.18034	1.25705	1.28965	1.51686	1.46225	1.45729	1.1214		1.06217		0.992804	1.08691		1.13677	1.12545	0.947815	0.854566	0.829091	1.05115	1.13734	1.0559	1.05792	0.948364	0.896337	0.768042	0.792313	0.708839	0.721982	0.728642	0.703652	0.702929	0.590655	0.568293	0.575727	0.543441	0.592875	0.611181	0.654356	0.658071	0.697329
					1.14927	1.01883	0.996815	1.00283	0.953352	1.0384	1.14418	1.23027	1.29034	1.3487	1.26199		1.23728	1.31499	1.24655	1.16689	1.22355	1.21517	1.30431	1.32082	1.43314	1.43075	1.51643	1.48816	1.56416	1.79256	1.8217	1.98947	1.81583	1.95595	2.05329	2.00333	2.12249	2.1229	2.10804	2.13722	2.18776	1.9663	1.8519	1.70152	1.6232	1.55064	1.47541	1.45766	1.43931
					2.35458	2.49892	2.21332	2.48993	2.21892	1.75096	1.40302	1.58537	1.84403	1.6125	1.11459	1.06863	1.18119	0.933049			0.787578	0.701307	0.611978	0.558453	0.569474	0.664372	0.6859	0.677721	0.772634	0.819833	0.778439	0.823866	0.818089	0.829694		0.948018	0.986939		1.11579	1.15744	1.17681	1.23495	1.23404	1.24912	1.33818	1.21706	1.28988	1.30935	1.15398
					0.818257	0.784826	0.652749	0.792347	0.838397	0.888151	1.06228	1.05566	1.22365	1.28224	1.33338	1.3579	1.40107	1.46915	1.27442	1.35121	1.125	1.11565	1.08349	0.880657			0.980757			1.17332	1.16078	1.15409		1.12484	1.05411	0.78749	0.751566	0.68868	0.712307	0.724293	0.759957	0.762809	0.805766	0.839272	0.888809	0.878105	0.934835	0.966452	0.964264
					1.21369	1.21592	1.27481	1.27751	1.18673		1.23959	2.15289		0.707283		0.530223	0.566057	1.02259	1.03138	1.01507	1.03103	1.01512	1.13494	1.20896	1.19814	1.12179	1.11304	1.07807	0.957146	0.974778	1.15249	1.29193	1.42024	1.5037	1.52035	1.74162	1.71585	1.69445	1.59533	1.58541	1.44332	1.36661	1.29839	1.31743	1.39816	1.30755	1.24505	1.14088	1.07202
					1.06717	1.03461	1.19765	1.19368	1.20858	1.35874	1.4783	1.60673	1.62339	1.76211	1.65983	1.8088		1.86105	1.70202	1.78135	1.90954	1.79059	1.65928	1.59907	1.66791	1.61927	1.81075	1.91962	1.88724	1.92803	1.97395	2.02716	2.18722	2.24871	2.34441	2.3011	2.21263	2.11255	2.16614	2.19541	2.11041	2.10489	2.00968	1.99955	1.73963	1.64195	1.62334	1.6527	1.52708
					2.72051	4.03549	3.1434	3.24041	2.77075	2.26877	2.7634	3.14417	3.26236	2.39845	2.3381	2.11964	2.11253	1.84444	1.68078	1.76792	3.04485	2.51213	2.58079	2.32146	2.70027	3.45313	3.1788	3.1323	3.67465	3.63005	4.04526	3.19509	2.89908	2.72531	3.3032	2.99708	2.3094	2.51822	2.25504	1.97569	1.98375	1.7083	1.78576	1.56461	1.64013	1.84839	1.72065	1.64302	1.72062
						0.546219	0.569447	0.786828	1.00052	1.03323	1.00749	1.01953	1.01188	1.01519	1.00274	0.963671	0.94234	0.824128	0.909255	1.01682	1.09046	1.07089	0.971724	0.975008	0.929467	0.870853	0.846871	0.791557	0.789254	0.842108	0.978998	0.980936	0.885608	0.975948	0.917571	0.92582	0.912507	0.897413	0.851648	0.865314	0.785078	0.740245	0.778936	0.788809	0.763461	0.735243	0.75186	0.697842	0.68733
						0.752005	0.7151	0.733311	0.737105	0.683969	0.754284	0.896565	0.864916	0.900964	0.940935	0.884389	0.827143	0.851434	0.803128	0.82529	0.831693	0.884193	0.922805	1.03116	1.04534	1.15356	1.0368	1.06055	0.988746	0.991332	0.914763	0.902543	0.883953	0.899864	0.827126	0.787726	0.798145	0.783559	0.750093	0.713129	0.676321	0.66131		0.579956	0.560096	0.587283	0.518969	0.526456	0.503007
						0.611624	0.656969	0.786167	0.788517	0.750777	0.726549		0.483628	0.457159	0.473294	0.559	0.715901	0.820534	0.836228	0.803659	0.97561	1.05309	1.11262	1.25368	1.45314	1.50695	1.63169	1.62876	1.73312	1.81487	1.69936	1.76492	1.66524	1.70564	1.78096	1.58648	1.68184	1.70511	1.49794	1.51836	1.67028	1.5966	1.5198	1.43826	1.46766	1.57169	1.60002	1.64536	1.7369
						0.581554	0.532392	0.444888	0.530169	0.674618		0.671702			0.92172		1.17892	1.07367	1.06232	1.06507	1.04856	0.957511	0.936051	0.971984	0.991499	1.05216	0.893828	0.948911	0.94948	1.00677	0.99898	0.98642	0.938208	0.933554	0.970849	1.00539	0.965824	0.92015	0.913635	0.930371	0.921827	0.870528	0.875366	0.837517	0.811669	0.822357	0.840041	0.86845	0.903185
						0.636499	0.522848	0.486247	0.483825	0.439502	0.458542	0.504238	0.500091	0.43615	0.450332	0.490318	0.543816	0.606346	0.623833	0.595835	0.606327	0.593264	0.569534	0.614546	0.621792	0.616237	0.628262	0.656875	0.631782	0.615279	0.633585	0.538578	0.527693	0.509472	0.410358	0.404798	0.415385	0.340089	0.327702	0.35282	0.506506	0.587865	0.578339	0.610777	0.594649	0.501412	0.494335	0.481198	0.528253
						0.597202	0.544062	0.495258	0.555412	0.5932	0.59347	0.67109	0.752957	0.763291			0.859777			0.865803	0.88048	0.819026	0.785087	0.825915	0.834965	0.797132	0.797296	0.83537	0.812526	0.821321	0.762411	0.788234	0.727429	0.801719	0.776982	0.793652	0.76463	0.748845	0.800007	1.32036	1.39762	1.46032		1.46347		1.38394	1.35669	1.20843	1.20006
						0.916628	0.962573			1.15873				0.994788	0.865572	0.875422	0.945151	0.82654	0.867111	0.83607	0.777196	0.718921	0.728043	0.812395	0.849973	0.879161	0.943996	0.948014	0.974536	1.118	1.25328	1.39196	1.40316	1.34606	1.40047	1.4973	1.47381	1.32878	1.37925	1.33569	1.31589	1.25063		1.22229		1.01178	1.01748	1.00856	0.983164
						0.428438	0.499079	0.476713	0.55849	0.672109	0.613312	0.606588		0.665868		0.734214		0.792237	0.674181			0.618178	0.643028	0.585349	0.592953	0.667454	0.574515	0.662823	0.681055	0.785823	0.748832	0.740432	0.837748		0.745846	0.791524	0.749012	0.621321	0.660159	3.12947	2.08637	2.02418	1.85563	1.66436	1.45629	1.31018	2.06218		1.94673
						1.15864	1.0907	1.06735	0.955731	0.881069	0.928355	0.949514	1.02339	1.01017	0.965332	1.05376	1.01649	1.14939	1.0328	0.979127	1.05044	1.06565	1.081	1.12262	1.12283	1.05228	1.01609	1.02182	1.04355	1.0602	1.04104	1.00146	0.961591	0.877053	0.824074	0.812465	0.780019	0.764816	0.764548	0.752764	0.781781	0.742633	0.750269	0.756877	0.798848	0.800106	0.816666	0.860876	0.946119
						1.70575	1.92803	1.9738	2.07848	1.69127	2.13426	2.90178	2.93009	2.80545	2.31514	2.43479	2.25084	2.44223	2.47076	1.93951	1.9257	1.77373	1.4784	1.56891	1.84042	1.87604	1.58903	1.58026	1.35013	1.20251	1.18193	1.32149	1.28296	1.31154	1.46826	1.39443	1.57147	1.39284	1.4324	1.6423	1.44671	1.24835	1.17354	1.04787	1.15178	1.01858	1.18187	1.07844	1.03853
							1.75858	1.67865	1.80092	1.78926	1.69608	1.58921	1.70102	1.58435	1.80757	1.6858	1.62498	1.51267	1.45798	1.22081	1.13854	1.04789	1.10673	0.970473	1.12673	1.29648	1.15741	1.29148	1.35469	1.49449	1.60501	1.6266	1.71467	1.77072	1.85863	1.83171	1.79023	1.66741	1.61615	1.53952	1.50049	1.44123	1.40514	1.34914	1.34841	1.42236	1.45858	1.56921	1.61012
							0.906124	1.01588	1.02833	1.04194	1.1071	1.19389	1.25437	1.3473	1.27428	1.41413	1.46246	1.45309	1.28063	1.31612	1.25937	1.15331	1.06874	0.998593	1.09569	1.17868	0.992084	1.27077	1.29787	1.18832	1.27067	1.35213	1.44093	1.44739	1.54684	1.56604	1.60108	1.60364	1.61986	1.47089	1.51275	1.41203	1.33014	1.23914	1.14409	1.12779	1.07853	1.16545	1.22303
							0.644625	0.630951	0.65937	0.750778	0.735509		0.683343	0.593518	0.529243	0.499266		0.417122	0.361052	0.315585	0.343999	0.32505	0.245592	0.227502	0.187966	0.146494	0.160146	0.165604	0.286537	0.356036	0.263499	0.279306	0.167047	0.192918	0.303205	0.335234	0.354409	0.381411	0.429065	0.45281	0.51275	0.477938	0.514388	0.495335	0.479762	0.473216	0.424127	0.400215	0.348902
							1.41685	1.32927	1.57716		1.51719		1.37824	1.23292	1.24036	1.19437	1.18237	1.09912		1.26365	1.17019	1.20165	1.12768	1.2119	1.26406	1.24654	1.36727	1.42283	1.52441	1.68084	1.63202	1.79072	1.82136	1.89398	1.88967	1.90687	1.91263	1.88778	1.76441	1.66406	1.52694	1.34717	1.28449	1.19315	1.21032	1.206	1.13736	1.14828	1.19011
							1.39004	1.78644	1.72451	1.48024	1.63113	1.44429	1.09682	0.924015	1.03855	0.788022	0.610732	0.733652	0.882977	0.8649	0.678585		0.65839		0.341744		0.207097	0.174793	0.211554	0.179285	0.151302	0.327164	0.23139	0.224801	0.26439	0.238801	0.244769	0.274048	0.256874	0.248271	0.28131	0.289762	0.277086	0.252414	0.308299		0.28076		0.321936
							0.308005	0.235392	0.393065	0.624271		1.02835	0.994583	0.699337			0.722482	0.762419	0.47916	0.49998	0.386618			0.414783			0.362481		0.240762	0.295018	0.292038	0.35202	0.39484	0.417045	0.401999	0.464295	0.480823	0.529231	0.564019	0.642397	0.728899	0.781665	0.759981	0.818162	0.816018	0.84487	0.807541	0.762389	0.734572
							1.54494	1.62354	1.48183	1.71123	1.98924	2.19861			2.2044						2.20414	2.15733	2.03468	1.9004	1.82473	1.78455	1.72919	1.66153	1.68012	1.70761	1.64958	1.67505	1.65116	1.69379	1.71022	1.79241	1.69645	1.61116	1.49883	1.42417	1.339	1.21103	1.08918	1.03795	0.957607	0.945208	0.929586	0.927951	0.937454
							3.75166	4.89886	2.63336		3.63948	1.94622	4.93559	5.41815	5.24011		4.36492	3.80957	2.537	2.98567	3.564	3.90121	4.40915	2.58321	1.62033	2.74327	2.42766	3.66149	3.84686	3.37193	3.15573	2.98486	3.19479	2.65162	2.79781	1.67748	1.51444	1.35466	1.90341	1.64483	1.04351	1.39256	1.63773	1.34204	1.63375	1.53714	1.50083	1.28636	1.61763
							0.967433	1.05923	0.994751	1.05417	0.967743	0.994484	0.967718	0.979689	1.04354				1.21637	1.39415	1.57893	1.56324	1.68177	1.86567	1.84388	1.91945	2.06516	2.28213	2.31879	2.18584	2.26329	2.26659	2.15405	1.80661	1.79511	1.7143	1.68652	1.531	1.56888	1.62932	1.61206	1.51493	1.637	1.62859	1.4723	1.6205	1.57939	1.58448	1.55244
							0.815914	0.779321	0.965286	0.723028	0.623151	0.668242	0.62368	0.594963	0.635967	0.717546	0.706766	0.717346	0.741108	0.754504	0.739932	0.800554	0.730955	0.717424	0.773842	0.76751	0.640121	0.633313	0.612063	0.591849	0.641396	0.639085	0.611832	0.596219	0.577243	0.575158	0.603182	0.627277	0.603067	0.62779	0.608133	0.606042	0.615313	0.528417	0.493772	0.435764	0.403894	0.457618	0.443526
								1.81042	1.60786	1.62498	1.48284	1.41626	1.59927	1.3766	1.3759	1.34212	1.30213	1.34905	1.41151	1.17766		1.04473	0.989167	0.893966	0.894159	0.871608		0.912506	0.884373	0.922789	0.86163	0.927766	0.891128	0.727593	0.716818	0.742678	0.7377	0.742329	0.614343	0.623826	0.629163	0.589234	0.584461	0.539287	0.495603	0.526083	0.504803	0.469697	0.524601
								1.03298	0.936034	0.870435	0.897906	0.830036	0.791525	0.842898	0.937238	0.975682	1.03344	1.19638	1.20205	1.21306	1.22937	1.31977	1.28981	1.40943	1.52513	1.47334	1.47084	1.40347	1.24009	1.15223	0.236104	0.207964	0.216487	0.262461	0.223137	0.205553	0.225359	0.211333	0.224488	0.21915	0.368487	0.439789	0.366032	0.413376	0.494851	0.478467	0.448182		0.432109
								0.927511	0.922087	0.783927	0.638584	0.52702	0.689741		0.619013		0.658755	0.671265	0.749925	0.818885	0.867567	0.76058						0.88912	0.927314	1.00007	1.02357	1.07692	1.11606	1.14251	1.24274	1.28653	1.33375		1.38508	1.41944	1.36232	1.34801	1.30135	1.19123	1.07486	0.974118	0.929447	0.854816	0.813728
								0.470398	0.502312	0.413725	0.543508	0.482666	0.597107	0.639704	0.733743	0.692263	0.818351	0.859372			1.01334	0.947856			0.943457	0.947026	0.98329	1.03402	1.07676	0.944726		1.06724	1.09729	1.33206	1.29715	1.34671	1.37635	1.29317	1.28966	1.11235	1.14784	1.15492	1.03915	1.09987	1.11186	1.09441	1.05639	1.06045	1.08924
								0.82723	0.826673	0.805721	0.86404	0.83445		0.960996	0.9737	0.912487	0.929047	0.968633	1.13835	1.15422	1.09223	1.05102	1.08606	1.04262	1.00465	1.07758	1.09469	1.05895			1.14677	1.15327			1.11814	0.867591	0.785018	0.754837	0.706803	0.741887	0.774365	0.706623	0.978637	0.89434	0.894175	0.903285	0.906281
									0.74891	0.671537	0.660651	0.544838	0.550198	0.620762	0.590366	0.588617	0.552588	0.578306	0.56127	0.642368	0.655835	0.660516	0.659004	0.615362	0.639951	0.680535	0.694928	0.786363	0.822971	0.888047	0.842038	0.853736	0.820814	0.86258	0.835493	0.821641	0.789812	0.755475	0.757569	0.696933	0.59319	0.541993	0.543521	0.513219	0.455101	0.497539	0.49899	0.538779	0.488459
									0.62809	0.657629	0.747151	0.731678	0.755754	0.806736	0.821104	0.825345		0.886037	0.90085	0.811757	0.789845		1.02057	1.08725	0.981287	1.0107	0.841949	0.925157	0.946396	0.971948	0.910858	0.847743	0.884825	1.03751	0.977375	1.01745	1.27345	1.33095	1.46724	1.49812	1.42857	1.36855	1.39641	1.3321	1.37921	1.35727	1.37084	1.34398	1.3008
									1.58398	1.63333	1.80126		1.50472		3.46711	2.23008			1.45414	2.2978	1.72253	2.5633	2.95876		1.67883	1.9542	1.88107	1.79344	1.70237	1.52046	1.45721	1.4976	1.43034	1.63251	1.65899	1.67391	1.63047	2.65919	2.22423	1.59956	1.78727	1.7399	1.77243	2.01329	1.83071	1.72616	1.76134	1.76909	1.85272
									0.281352	0.362127	0.435809	0.457168	0.446439	0.401873	0.561661	0.662398	0.688446		0.980437	1.04051	1.00739	1.02397	0.848167	0.749127	0.726866	0.704245	0.747207	0.72335	0.751424	0.804155	0.899639	0.903303	0.835047	0.86358	0.904858	0.802719	0.67075	0.663829	0.640897	0.657187	0.571373	0.594908	0.573711	0.518882	0.538449	0.471676	0.485472	0.491551	0.462692
									0.767738	0.936249	0.928118	0.988166	0.949519	1.11676	1.08191	1.12659	1.19672	1.25706	1.12843	1.20798	1.08541	1.06408	1.00049	1.18421	1.18302	1.10496	1.1196	1.07139	1.10705	1.11713	1.12974	1.07064	1.08409	1.11086	1.13003	1.22306	1.23286	1.28255		1.28847	1.29455	1.15943	1.01701	0.963964	0.892204	0.910073	0.867389	0.878746	0.924261
									0.656889	0.732148	0.808994	0.83183	0.925352	1.05129	1.14265	1.15162	1.27412	1.34429	1.39595	1.4142	1.37069	1.16534	1.09292	1.01494	1.03594	0.98398	0.948079	0.908544	0.82162	0.842906	0.860986			0.984562	0.994933	0.984825	1.02409	1.06049	1.09051	1.13897	1.19304		1.26439	1.21087	1.21164		1.23317	1.07577
										0.366269	0.400267	0.325829		0.321912	0.352593	0.373414	0.432295	0.419313	0.462091		0.476247	0.525314	0.533068	0.547673	0.565721	0.569023	0.605406	0.61403	0.660835	0.646252	0.661053	0.711293	0.748832	0.767961	0.817459	0.82647	0.897571	0.905462	0.921469	0.995967	0.945019	0.917327	0.885971	0.894851	0.870597	0.908371	0.914686	0.852298	0.859993
										0.525952	0.591395	3.24003	0.523463	0.82058	0.509556	0.396793	0.78177	0.570176	0.659237	0.672322	0.746229	0.625932	0.732191	2.56547	0.664798	0.647658	0.872689	0.749054	0.714333	0.783259	0.75714	0.779263	0.720493	0.794577	0.737684	0.749557	0.686102	0.803156	0.77211	0.864477	0.779071	0.849426	0.676758	0.841354	0.844372	0.837174	0.909891	0.949099	0.758068
										1.44632	1.29768	1.31729	2.01276	4.517	4.08851	4.90473	2.88173	2.56901	2.88834		2.94868	3.03074	2.9126	3.25079	2.61473	3.85081		4.50561	1.54817						3.45657	3.27642	2.65348	2.94586	2.96381	3.8518	2.87863	2.79538	2.88463	2.99669	3.82407	4.45327	3.69883	3.35202	2.92594
										0.317268	0.281376	0.357475	0.46943	0.295923	0.326961	0.292692	0.423675	0.393445	0.430987	0.480891	0.638583	0.742506	0.654407	0.719484	0.832825	0.846785	0.906324	0.91839	0.979269	0.94972	0.99122	1.20567	1.08478	1.11434	1.21197	1.13104	1.17557	1.29555	1.3957	1.44878	1.4388	1.50441	1.51931	1.57464	1.58039	1.66963	1.56808	1.58301	1.72525
										2.16074	1.52374	1.5189	1.73922	1.58031	1.42696	1.28447	1.49307	1.3418	1.09699	1.00012	0.996597	0.864392	0.894372	0.889953	0.74182								0.900157	0.914087	0.592818	0.449671			0.702114	0.574888	0.663334		0.756256	0.871533			0.846037	0.962149	0.907089
										0.926019	1.05567	1.2599	1.27544	1.4978	1.50093	1.60573		1.65597		1.70746	1.75927	1.61327	1.51893	1.58183	1.50792	1.50671	1.65605	1.57978	1.67093	1.55306	1.51359	1.625	1.50992	1.39419	1.17639	1.25883	1.25502	1.23902	1.24223	1.35332	1.50698	1.1625	1.1876	1.0483	1.23604	1.26776	1.47793	1.55653	2.23953
											0.742082	0.78822	0.830147	0.736269	0.812314	0.841776	0.899132			0.836104	0.832013	0.873084	0.859437	0.841511	0.923188	0.911213	1.08839	1.00419	0.962695	0.941375	1.01536	1.00848	1.11906	1.14994	0.995737	1.07149	1.07109	0.985419	0.991694	0.877299	0.976576	0.911692	0.916451	0.985851	1.03719	1.03529	1.07153	1.13235	1.15213
											2.01075	2.22883	0.851512	0.567117	0.383213	0.416588	0.452213	0.568508	0.718886		1.01564	0.743974	0.793193	1.14589	1.7755	1.63401	1.71385	1.821	1.69302		2.94844	1.69064	1.67184	1.47381	1.60826	1.71912	1.36911	1.31515	1.393	1.19579	1.21088	1.01256	1.03421	1.26763	1.24297	1.08939	1.08608		1.06661
											1.07246	1.15175	1.24885	1.31439	1.27196	1.35525	1.41045	1.38087	1.29495	1.16244	1.11379	1.07536	1.01196	0.989471			0.989316	1.02384	0.941075	0.91855	0.862164	0.914048	0.938573	0.903691	0.992929		1.11084	1.09396	1.20983	1.21309	1.21636	1.13242	1.12061	1.06621	1.07288	1.00287	1.04034	1.04553	1.04368
											0.401501	0.600529	0.594453	0.628123	0.62204					0.600663	0.703674	0.749247	0.649797	0.607231	0.618485	0.723976	0.703668	0.698492	0.780562	0.809183	0.785353	0.753431		0.717296	0.773865	0.791106		0.813486	0.892651	0.943302	0.942957	0.947	0.971047	0.914213	0.938859	1.00896	1.01458	1.01074	1.00738
											0.478686	0.446767	0.487875	0.391731	0.446307	0.52923	0.512488	0.479265	0.53399		0.725381	0.63875	0.689862	0.797789	0.779605	0.7913	0.892209	0.880033	0.935071	0.998439	1.06097	1.05938	1.03494	1.06417	1.04922	0.971428	0.999928	1.05014	0.938827	0.98151	1.06103	1.01845	1.09017	1.23657	1.28221	1.2744	1.22545	1.16943	1.27626
											0.59779	0.598683	0.867735	0.871438	0.845515	0.720038	0.718472	0.721141	0.698994	0.705872	0.730042	0.735218	0.761141	0.855187	0.88589	0.959924	1.0669	0.98755	0.998973	0.975655	0.969836	1.12013	1.16786	1.07126	1.07081	1.00808	0.98747	0.985644	1.10004	1.0944	1.04393	0.952565	0.927166	0.93777	0.95818	0.976344	0.955492		0.935261
											1.55846	1.75828	2.54326	2.36646	2.18563	2.50769	1.68275	1.41551	1.08978	0.962297	1.48446	1.37751	1.1163	1.03973	0.963417	1.13343	1.02019	1.09423	1.13637	0.938078	0.899162	0.877519	0.930482	0.908779	0.926844	0.911449	0.766269	0.962299	0.801242	0.836122	0.918267	1.08152	0.872298	1.22618	0.923007	1.19676	0.919987	1.02644	1.026
												0.826202	0.703975	0.438615	0.640125	0.720391	0.915658	0.959364	0.912533	0.804599	1.02388	0.988894	0.722398	0.80839	0.93652	0.682433	0.76514	0.674244	0.694629	0.567628	0.522706	0.485082	0.433727	0.431829	0.40021	0.490052	0.46414	0.457836	0.522509	0.577409	0.503332	0.551503	0.561939	0.579204	0.680001	0.640997	0.668159	0.600369	0.660285
												0.680683	0.664161	0.788899	0.756681	0.797545	0.721469	0.590042	0.511309	0.494722	0.438101	0.424405	0.422421	0.422722	0.426051	0.422201	0.453446	0.464172	0.520258	0.50421	0.547992	0.530451	0.571159	0.577973	0.59873	0.601333	0.573611	0.576995	0.597276	0.658959	0.771214	0.760398	0.769089	0.825659	0.869762	0.868033	0.842284	0.920807	0.91696
												0.976439	1.13164	1.35778	1.41402	1.332	1.20712	1.14254	0.984117	0.98317	1.03891	0.964504	1.08383			0.767614	0.722133	0.65895	0.666128	0.653807	0.730158	0.731471	0.727292	0.814814	0.84812	0.827914	0.827234	0.751934	0.750324	0.734435	0.695669	0.663447	0.664807	0.710632	0.69856	0.740036	0.720677	0.737298	0.761335
												0.566641	0.544498	0.608909	0.542626	0.618455	0.755438	0.74868	0.732385	0.631096	0.611863	0.681804	0.641861	0.701126	0.689521	0.721564	0.75207	0.606496	0.680883	0.734598	0.766431	0.806048	0.635386	0.821864	0.818913	0.896864	0.903494				0.800389	0.777364	0.706312	0.697573	0.631414	0.664269	0.631071	0.65867	0.674444
													1.14228	1.23428	1.21939	1.30781	1.29239	1.16557	1.16321	1.31888	1.28115	1.29402	1.19902	1.16826	1.2608	1.20464	1.26901	1.19524	1.14096	1.14502	1.1477	1.1774	1.19588	1.23183	1.16215	1.1095	1.07768	1.04194	1.06211	1.06148	1.01897	1.0672	1.02826	1.03541	1.08641	1.05335	1.07485	1.03297	1.00393
													0.377873	0.393465	0.458878	0.538412	0.584507	0.659138	0.674722	0.75889	0.709673	0.780222	0.810932	0.835818	0.949374	0.945242	0.973551	0.994824	1.0436	1.41233	1.45128	1.45272	1.49387	1.43561	1.46846	1.36578	1.48788	1.45024	1.5068	1.60916	1.5638	1.48775	1.39805	1.50881	1.52485	1.46805	1.40793	1.46552	1.4462
													0.849634	0.781726	0.843058	0.936156	0.949519	0.890637	1.09294	1.11068	1.12998	1.20521	1.15578	1.26275	1.19337	1.16751		0.899868				0.809997				0.869389	0.863251	0.875572	1.2015	1.18608	1.02705	1.15199	1.11231	1.09869	1.0778	0.893808	0.992395	0.908064	0.946135
														0.481984	0.454378	0.538369	0.48673	0.609735	0.544549	0.545398	0.589018	0.522715	0.569566	0.543111	0.687393	0.65208	0.704834	0.714656	0.78445	0.816429	0.813667	0.731582	0.79775	0.822103	0.862039	0.912902	0.892198	0.869055	0.902412	0.907866	0.905477	0.831177	0.844975	0.795285	0.798318	0.78213	0.72996	0.757182	0.703976
														1.51611	1.86333	2.9505	2.45472	2.11425	1.93387	1.87916	1.73751	1.85972	1.91416	1.9082	1.69408	1.53079	1.48427	1.51529	1.4525	1.3648	1.32095	1.21711	1.28485	1.20531	1.16573	1.15528	1.1232	1.14085	1.15106	1.20396	1.26147	1.18013	1.19536	1.24906	1.09335	1.08004	1.05352	1.11216	1.15098
														0.520565	0.50911	0.528996		0.493465	0.568928	0.471368	0.556493			0.738333		0.932073	0.998877	1.01442	1.03563	1.09783	1.08161	1.15122	1.19986	1.27687	1.32445	1.32662	1.34401	1.37837	1.36947	1.33529	1.14738	1.02418	0.946026	0.864658	0.823467	0.777687	0.780154	0.738116	0.779318
														0.77118	0.951201	0.677254	0.603143	0.536879				0.869057		0.661699	0.60629	0.600625	0.662431	0.671754	0.640784	0.615857	0.630369	0.579284	0.546851	0.530248	0.55178	0.565202	0.56646	0.595122	0.73456	0.660655	0.717771	0.695701	0.682198	0.769227	0.746541	0.789703	0.777612	0.768807	0.823585
														0.589022	0.752501	0.789966	0.887468	0.852898	0.783239	0.713659	0.631443	0.701446	0.640776	0.728999	0.832551	0.85454	0.947347	0.786908	0.777278	0.888937		0.980537						0.681072	0.703428	0.684571	0.670637
														1.5156	1.68471	1.57283	1.50064	1.66343	1.86692	1.76853	1.73149	1.65557	1.53486	1.84904	2.08283	2.12581	2.05704	2.30742		2.51606	2.48752	2.49109	2.51937	2.59689	2.80195	2.81262	2.78909	2.69394	2.41027	2.34344	2.07401	1.91882	1.61996				1.13351		1.12617
															0.873901	0.860145	0.917971	0.976018	0.883254	0.83274	0.822237	0.851329	0.80687	0.801861	0.800471	0.770426	0.822229	0.890582	0.901613	0.832842	0.831087	0.850441	0.881526	0.852134	0.825824	0.828322	0.78592	0.794234	0.822789	0.752692	0.722435	0.647139	0.515459	0.496192	0.510776	0.531345	0.556797	0.583077	0.629688
															0.789787	0.875635	0.928723	1.03414	1.07508	1.02411	0.836908	0.752369	0.719837	0.757469	0.778789	0.752282	0.726203	0.678274	0.578799	0.521503	0.564173	0.491749	0.447359	0.411344	0.407932	0.381149	0.431426	0.411006	0.411308	0.408227	0.442847	0.445603	0.414572	0.43331	0.471881	0.739462	0.85849	0.762608	0.690469
																0.884091	0.722156	0.805429		0.623217	0.86849	1.08922	1.26079	1.24722	1.22581	1.10461	0.963506	0.897787	0.874641	0.809255	0.771234	0.734254	0.699205	0.670314	0.69014	0.665799	0.712643	0.784975	0.844701	0.863916	0.870088	0.824366	0.8481	0.874584	0.806324	0.773036	0.738554	0.671107	0.618055
																0.737543	0.864353	0.694435	0.727406	0.671857	0.648743						0.766227	0.84666	0.766255	0.760915	0.819904	0.80253	0.773475	0.798724	0.759523	0.763489	0.660843	0.679493	0.638204	0.658	0.577017	0.554842	0.553342	0.533681	0.604259	0.600094	0.584561	0.444209	0.343154
																0.528999	0.428717	0.401783		0.406506	0.431122	0.487631	0.548193	0.567358	0.607109	0.610291	0.607741	0.621792	0.618406	0.637003	0.649113	0.642412	0.701587	0.727049	0.728282	0.738874	0.713617	0.760044	0.797607	0.801446	0.832167	0.878174	0.904863	0.916016	0.893383	0.868443	0.855367	0.800625	0.808027
																	1.39386	1.33006	1.29264	1.30335	1.39657	1.22239	1.32222	1.14859	1.03172	1.04453	1.05873	1.12159	1.15472	1.22849	1.20212	1.32829	1.29928	1.36463	1.29577	1.33849	1.31264	1.38982	1.33036	1.22165	1.21351	1.10532	1.03249	0.984812	0.978768	0.927882	0.878002	0.854006	0.876773
																	1.44561	1.4948	1.79977	1.60978	1.7386				0.881771	1.06191	1.01935	1.01022	1.02258	0.936624	1.17153	1.02733	0.887907	0.980899	0.792145	0.830985	0.773108	0.733529		0.692068	0.637922	0.683359	0.74013	0.692409	0.633002	0.543073	0.531373	0.529457	0.532638
																	0.705072	0.667875	0.570986	0.655139	0.751652	0.760538	0.85191	0.770994	0.611036	0.574698	0.625682	0.565115	0.547742	0.551564	0.533916	0.506618	0.551407	0.500168	0.482538	0.515578	0.456895	0.48579	0.565504	0.511747	0.59698	0.70876	0.716747	0.697737	0.692325	0.701964	0.698614	0.735367	0.705052
																		0.307757	0.480297	0.408482	0.42918	0.360228	0.395588	0.369557	0.406397	0.402975		0.403657	0.405478	0.368851	0.390303	0.712696	0.94444	0.966864	0.905889	0.863349	0.842071	0.569515	0.36776	0.562803	0.577187	0.580041	0.597927	0.579997	0.509125	0.518922	0.529181	0.504683	0.507253
																		0.747759	0.748492	0.569201	0.619818	0.650104	0.752283	0.872052									1.03678	0.984352	0.896055	0.817522	0.854014	0.954313	0.991327	1.05281	1.14138	1.05355	1.01875	0.971244	0.910624	0.915291	0.90615	0.921017	0.968521
																			0.552656	0.518329	0.471201	0.460791	0.493523	0.545434	0.595891	0.691214	0.668977	0.723332	0.70777	0.706143	0.713172	0.771856	0.831075	0.780748	0.757778	0.755333	0.743298	0.651701	0.72319	0.491839	0.438833	0.419655	0.392399	0.374471	0.382129	0.360791	0.339574	0.380456	0.411555
																			0.720242	0.742961	0.777797	0.773075	0.724557	0.766384	0.73061	0.722878	0.841495	0.842524	0.857371	0.773588	0.723847	0.673125	0.668459	0.6374	0.673497	0.608482	0.547042	0.571894	0.560938	0.548519	0.572284	0.58576	0.529904	0.536926	0.53878	0.549948	0.510112	0.503333	0.525598
																				0.531005	0.291661	0.240164		0.159151	0.22698	0.179802	0.162835	0.156791	0.167361	0.178738	0.239937	0.246752	0.341164	0.424075	0.442662	0.494273	0.627228	0.64269	0.64487	0.720553	0.789903	0.741313	0.778123	0.748676	0.798025	0.789766	0.72918	0.732818	0.732997
																				0.945493	0.909167	0.844881	0.877303	0.945516	1.06942	1.12781	1.18061	1.21819	1.42737	1.54909	1.66137	1.75429					1.77946	1.69159	1.9768	1.74341	1.75759	1.74872	1.67517	1.56584	1.5772	1.5616	1.58787	1.62436
																			0.894477	0.801377	0.899369	0.851918	0.957006	0.866224		0.860685	0.881509	0.916914	0.884413	1.02213	1.48825	0.781461	0.798054	0.851471	0.628817	0.758129			1.43197	1.34793		1.17463	0.960437	0.977542	0.833993	0.769616	0.719911	0.728571	0.624216
																			0.644163	0.626473	0.599481	0.652503	0.604304	0.600706	0.617443	0.556347	0.601122	0.597926	0.614836	0.53324	0.522563	0.481786	0.423296	0.71176	1.01691	0.85102	0.515994	0.467434	0.379986	0.285777	0.244326	0.277952	0.252452	0.177527	0.233772	0.244152	0.237877	0.231677	0.412844
																			0.719055	0.733906	0.748669	0.83733	0.939199	1.0291	1.10482	1.13793	1.11567	1.20094	1.27612	1.47791	1.57467	1.55214	1.54569	1.66037	1.52746	1.30353	1.53775	1.57473	1.59441	1.61201	1.55887	1.45477	1.41341	1.30243	1.29364	1.25972	1.23999	1.20838	1.20319
																			0.904191	1.03292	1.05846		1.07876				0.971368	0.552872	0.531274	0.509293	0.502839	0.497643	0.514412	0.498143	0.54018	0.571833	0.583123	0.637938	0.635455	0.665221	0.624354	0.705227	0.73131	0.767926	0.662491	0.68263	0.743098	0.594071	0.574131
																				0.739989	0.852853	1.01876	1.16972	1.23949	1.23458	1.35134	1.45203	1.45251	1.43454	1.4171	1.48336	1.5312	1.59168	1.70255	1.76467	1.8293	1.94291	2.02189	1.9423	1.81547	1.75027	1.65118	1.583	1.56074	1.527	1.53076	1.43516	1.38152	1.33218
																				0.450483	0.453248	0.483305	0.611561	0.657319	0.699491	0.817069	1.15227		0.687293	0.46969	0.391672	0.385846	0.384777	0.311336	0.677847	1.01185	0.929055	0.862321	0.74073	0.736134	0.71563	0.658128	0.581368	0.557615	0.539035	0.435299	0.41163	0.369321	0.356221
																				1.0375	0.746088	1.1113		0.885162	0.983389	1.08497	1.10964	1.0728	1.02034	0.970869	0.97835	0.950389	0.896675	0.897823	0.85718	0.844582	0.826208	0.839846	0.842772	0.801593	0.780726	0.763332	0.775924	0.784434	0.776559	0.785951	0.789126	0.78309	0.823006
																				0.733794	0.587247	0.576876	0.514739	0.422297	0.391495	0.374045	0.317566	0.322957	0.323148	0.35271	0.423	0.448706	0.48738	0.492164	0.562622	0.609137			0.470727		0.419851	0.417066	0.439894	0.452768	0.430883	0.453106	0.475476	0.507494	0.50498
																				1.08417	0.60014	0.579136	0.541312	0.553048	0.586531	0.60663	0.638869	0.673788				0.665334	0.731669	0.746968	0.631373	0.838231	0.722412	0.805147	0.832161	0.833565	0.843663	0.792061	0.762247	0.670129	0.613039	0.658162	0.644418	0.58094	0.571393
																				0.222708	0.22589	0.206866	0.33893	0.334886	0.282066	0.342106	0.396384	0.379926	0.354716	0.36222	0.386665	0.433647	0.443183	0.465051	0.517949	0.571587	0.572075	0.55938	0.597176	0.597824	0.604689	0.677462	0.853539	1.19269	1.33206	0.758955	0.716079	0.712688	0.483153
																				0.865141	0.804333	0.928883	1.00418	1.16549	1.364		0.507748	0.442337	0.445687	0.461343	0.541952	0.838223	0.978094	1.25852	1.42627	1.28992	1.026	0.793028	0.710675	0.736043	0.831003	0.917828	0.888279	0.788739	0.765033	0.674889
																				0.509464	0.410768	0.419664	0.241843	0.226157	0.175879		0.150776	0.122768		0.16269	0.134436	0.22348	0.27193	0.240462	0.248616		0.280539	0.31072	0.399192		0.318032	0.292366	0.199954	0.180115	0.137526	0.139626	0.0892832	0.0994194	0.112306
																				0.63858	0.694369	0.587323	0.592682	0.60111	0.593867					0.78158		0.63781	0.68502	0.650174	0.680323	0.704342	0.76728	0.765035	0.775145	0.812072	0.837932	0.862169	0.881238	0.869026	0.950746	1.00712	1.02758	1.01189	1.01686
																					0.652904	0.764983	0.607996	0.638907	0.50612	0.600472	0.465262	0.34221	0.348838	0.318185	0.306743	0.309441	0.299793	0.30527	0.308373	0.315019	0.354506	0.371919	0.230663	0.240067	0.210805	0.168149	0.178488	0.19792	0.203204	0.235244	0.204768	0.195199	0.245468
																					0.611683	0.684299	0.628296	0.588361	0.590219	0.55343	0.583209	0.536437	0.6075	0.547769	0.594233	0.645512	0.649977	0.694461	0.662674	0.634526	0.572232	0.548749	0.539452	0.54002	0.560147	0.511965	0.541306	0.531795	0.510556	0.539673	0.543078	0.589202	0.613417
																					1.03816	0.881847	0.798208	0.810305	0.790537	0.832307	0.83417	0.837833	0.825512	0.854475	0.898553	0.986867	1.02464	1.0468	1.0405	0.990292	0.961569	0.91149	0.970079	0.990396	0.909996	0.932764	0.938498	0.977028	1.05445	1.11226	1.18295	1.22042	1.25135
																					0.935908	1.03738	0.944807	0.675385	0.869423	0.973331	1.17071	1.27022	1.36306	1.50687	1.53502	1.51438	1.25704	1.24593	1.08864	1.03213	1.03375	0.982016	0.956525	0.904096	0.866357	0.764856	0.764452	0.733375	0.723074	0.750461	0.712969	0.705287	0.671304
																					0.505062	0.494997	0.490714		0.440391			0.389262	0.342519	0.297853	0.335127	0.313766	0.290593	0.249747	0.319686	0.38377		0.354885	0.414433	0.380211	0.38151	0.397029	0.411033	0.373317	0.30972	0.354376	0.350412	0.380169	0.347431
																					0.558313	0.530527	0.430645	0.449055	0.452267	0.471999	0.423636	0.460114	0.541256	0.599533	0.594715	0.6588	0.615871	0.624809	0.608297	0.65147	0.675331	0.797101	0.757638	0.753903	0.569303	0.693854	0.627039	0.567757	0.492036	0.450659	0.389283	0.397579	0.357604
																					0.89504	0.928733	0.838798	0.950623	0.859561	0.916378	0.944759	1.05443	1.01863	1.00373	0.963596	0.907646	0.782874	0.690752	0.651734	0.589204	0.58463	0.680144	0.685918	0.766693	0.729137	0.684078	0.658994	0.636839	0.599828	0.608965	0.643123	0.640388	0.702276
																					2.89896	2.5972	2.48133	2.30746	3.30487	2.48397	2.88174	2.66509	3.28261	2.57531	3.0718	2.98248	1.79751	2.2204	2.67522	3.45318	3.14271	3.24299	3.33678	3.54852	3.7357	3.53396	3.74384	2.78463	2.69351	2.25045	2.01596	2.4552	2.15982
																						0.569729	0.609905	0.586114	0.639853	0.779302	1.19069	2.13323	0.641854	0.608216	0.505244	0.530472	0.196458	0.920306	1.14403	1.16653	1.11326	1.18405	0.91053	0.871032	0.881451	0.857479	0.8299	0.790389	0.814769	0.741505	0.68529	0.591701	0.528663
																						0.586526	0.586998	0.642315	0.63328	0.618602	0.606689	0.626782	0.605565	0.635368	0.599726	0.58787	0.595634	0.584161	0.547262	0.544896	0.552339	0.587336	0.535586	0.547557	0.572013	0.558493	0.540782	0.549709	0.52293	0.513185	0.476005	0.508787	0.500755
																						0.989407	1.02965	1.04151	1.09636	1.15646	1.38452	1.3707	1.35191	1.31212	1.7157	1.71461	1.32187	1.36701	1.43023	1.60539	1.39115	1.3943	1.43256		1.59421	1.50036	1.4523	1.5379	1.57716	1.31169	1.30452	1.37056	1.20569
																						0.893362	0.827647	0.877312	0.980384	0.930197	0.9869	1.00852	1.08598	1.16736	1.18854	1.11981	1.08516	1.02769	0.87625	0.786175	0.696037	0.670185	0.594744	0.60061	0.627351	0.636171	0.650067	0.716865	0.723741	0.751027	0.797713	0.842056	0.902625
																						2.16189	2.1455	2.00178		1.9783	1.82881	1.84223	1.75919				1.69146	1.67791	1.68365	1.64094	1.60665	1.5702	1.41183	1.40512	1.21741	1.0934	0.986392	0.928707	0.920346	0.922619	0.939142	0.937478	0.941939
																						0.208282	0.283808	0.179485	0.223437	0.225512		0.253278	0.306379	0.314902	0.405285	0.398445	0.443469	0.484426	0.520982	0.548198	0.499035	0.507529	0.514429	0.465247	0.429691	0.403598	0.278815	0.250864	0.278167	0.218782	0.250398	0.225808	0.26952
																						0.585886	0.574436	0.633404		0.622903				0.654019	0.766834	0.887164	0.887149	0.916024	0.912031	0.96484	0.845599	0.797824	0.716824	0.537316	0.5792	0.538899	0.578353	0.539455	0.543978	0.553618	0.524308	0.552571	0.527954
																						0.64655	0.340999	0.390626		0.474398		0.597452	0.541161	0.637249	0.673968	0.497939	0.510652	0.603897	0.613686	0.69695	0.47988	0.753292	0.634183	1.09606	0.882658	0.879245	0.80687	0.746522	0.886312		0.778754
																						0.796458	0.687271	0.713003	0.697644	0.763355	0.804824	0.785548		0.944425	1.02507	0.970194	0.930623	1.01156		1.04988	0.957967	0.898302	0.992544	1.02146	1.29268	1.3247		0.910371	0.934855	0.867156			0.749267
																						1.00786	0.746448	0.810581	1.1663	1.18113	1.32954	1.29026	1.78197	2.4641	2.30602	2.00951	1.83582	1.62959	1.41192	1.56884	1.72756	1.7828	1.70536	1.79502	1.76229	1.93286	1.79784	1.81659	1.83323	1.79001	1.62411	1.99583	1.7627
																							0.855873	0.844224		0.881217	0.878804					1.02548	1.0611	1.17753		1.35149		1.47877	1.06385	1.0992	0.727044	1.0496	0.993261	0.996493	0.948195	0.944913	0.93882	0.926344	0.865913
																						0.613299	0.631402	0.638238	0.660973	0.679839	0.669497	0.629836	0.600542	0.612636	0.615375	0.64588	0.737431	0.799067	0.8358	0.912318	0.792394	0.753705	0.729509	0.77518	0.777754	0.786302	0.797754	0.841834	0.808866	0.821822	0.853186	0.924011	1.05515
																						0.786938	0.810236	0.771241	0.741958	0.833989	0.918148	1.04741	1.21983	1.1644	1.26497	1.33957	1.42659	1.58449	1.68076	1.51649	1.52508	1.50769	1.51368	1.60437	1.50008	1.42618	1.39992	1.35709	1.22041	1.16444	1.15353	1.1339	1.15819
																						0.751409	0.757567	0.810798		0.788484	0.876377	0.878645	0.902185				1.07027	1.06623	1.10568	1.10676	1.03046	1.0015	1.08991	1.08146	1.11872	1.10579	1.09958	1.07372	1.08554	1.0693	1.03257	1.05201	1.03739
																							0.433395	0.452294	0.499471	0.511696	0.513333	0.520592	0.505817	0.559496	0.578924	0.590237	0.572164	0.616834	0.652156	0.652199	0.686016	0.740173	0.793409	0.833269	0.889528	0.789378	0.805426	0.823373	0.792713	0.745282	0.724919	0.722553	0.637305
																							0.696602	0.75541	0.73672	0.734549	0.71024	0.694263	0.664214	0.653415	0.627581	0.593207	0.584439	0.540876	0.554282	0.495577	0.459139	0.46399	0.445597	0.398771	0.427488	0.510073	0.443085	0.411868	0.409562	0.356726	0.354025	0.422978	0.460214
																							0.855194	0.834561	0.829659	0.718241	0.707653	0.682241	0.667121	0.610673	0.608574	0.637262	0.645905	0.654655	0.700646	0.705524	0.74664	0.765363	0.764096	0.750196	0.698174	0.622355	0.622438	0.580351	0.578406	0.595062	0.637685	0.707579	0.754026
																							1.35465	1.13668	1.25026	1.28804	1.31303	1.38591	1.42323	1.39614	1.42159	1.47208	1.43011	1.33181	1.24488	1.14309	1.10421	1.08773	1.1031	1.05863	1.05071	1.05296	0.971672	0.928384	0.911656	0.927773	0.963486	0.903234	0.872621
																							1.27599	1.19239	1.28899	1.25752	1.15539	1.14475	1.11848	1.09716	1.06485	1.01081	0.990841	0.917177	0.913324	0.839036	0.852925	0.834949	0.879693	0.869298	0.875459	0.845324	0.850127	0.860729	0.889961	0.927674	0.951463	0.942301	0.972577
																							0.51159	0.530776	0.707763	0.865885	1.30856	2.02591	0.651195	0.438281	0.244629	0.249621	0.392873	0.56625	0.657682	0.873525	1.09031	1.17976		0.776868	0.939891	1.00281	0.996177	0.870406	0.920693	0.85557	0.815397	0.814945	0.83456
																							0.864414	0.853411	0.804175	0.708981	0.735279	0.735132	0.834963	0.788587	0.847431	0.932866	0.826445	0.775684	0.645711	0.593352	0.632183	0.620109	0.584634	0.515372	0.506431	0.60785	0.554441	0.563763	0.594922	0.67528	0.724806	0.654079	0.681172
																							0.493865	0.904155	1.3923					0.754604	0.792674	0.79174	0.715262	0.631745	0.791126	0.719163	0.657923	0.603456	0.566127	0.578733	0.526363	0.475138	0.548063	0.455956	0.528471	0.454399	0.381508	0.388813	0.344747
																							0.265829	0.274449	0.236978	0.262648	0.200745	0.214119	0.257729	0.27462	0.307992		0.35504		0.576611	0.545382	0.442268	0.462974	0.565147	0.493488					0.913646	0.9174		0.689008	0.651631
																							4.86392	3.32758	4.65171	5.77465		4.97455		4.71631		5.04979	4.35411		4.47745	2.74336			0.991864	1.34068	1.28987		1.133	1.1826	1.1538	1.3875
																								0.416617	0.405114	0.461929	0.460328	0.462515	0.534569	0.514224	0.475961	0.451906	0.468609	0.5537	0.623452	0.680045	0.727818	0.705139	0.758723	0.728948	0.752366	0.720588	0.678134	0.610887	0.538672	0.51328	0.411907	0.400825	0.4041
																								0.250502	0.276346	0.298428	0.348005	0.385636	0.430551	0.491491	0.566643	0.681471	0.723127	0.733877	0.654123	0.558555	0.446105	0.384282	0.374804	0.384769	0.3448	0.326304	0.330147	0.283192	0.274026	0.274452	0.276026	0.319484	0.28139
																								0.326195	0.340394	0.360003	0.397629	0.401913	0.320456	0.271181	0.206484	0.199604	0.153953	0.127962	0.115879	0.188393	0.120012	0.166762	0.129064	0.262899	0.424917	0.452989	0.443211	0.350997	0.300991	0.385629	0.391631	0.447683	0.450948
																								0.789309	0.790078	0.816192	0.77073	0.751803	0.713607	0.703234	0.621337	0.604854	0.57491	0.524928	0.547658	0.514427	0.4859	0.488164	0.469864	0.523363	0.578614	0.597719	0.59477	0.625249	0.593409	0.582843	0.584522	0.56884	0.541025
																								0.671401	0.661874	0.582123	0.530113	0.482474	0.434234	0.402544	0.398041	0.374513	0.343314	0.372173	0.418588	0.39365	0.405197	0.387662	0.404998	0.412425	0.480127	0.467933	0.471821	0.494784	0.506402	0.535561	0.538401	0.57129	0.547077
																								0.67869	0.841836	0.906582	0.857109	1.03536	1.04838	1.18897	1.22339	1.2063	1.2503	1.19516	1.21175	1.15554	1.21453	1.28993	1.18444	1.18604	1.09969	1.06955	0.992935	0.910623	0.830749	0.772593	0.715811	0.696426	0.681241
																								0.817772	0.788134	0.740564	0.719707	0.719212	0.752688	0.767532	0.759427	0.740607	0.747677	0.777759	0.758992	0.719558	0.693059	0.673663	0.629531	0.625515	0.618346	0.619961	0.58522	0.616836	0.640919	0.63764	0.639377	0.628725	0.643708
																								1.08562	1.17428	1.41428	1.27903	1.09659	0.987315	1.14211	1.00875	1.10845	1.0624	0.94385	0.93996	0.930493	1.16999	1.47355	1.37435	1.50997	1.71922	1.33385	1.21639	1.1963	1.22071	1.24731	1.11027	1.0238	1.08745
																								1.07893	1.03514	1.42283	1.92707		2.68645	2.69538	3.04075	2.51891	2.93242	2.37225	2.95941	3.16483	3.10174	2.57601	1.92386	1.87568	1.60436	1.76713	2.05528	1.81139	2.30478	2.3254	2.10593	1.98679	2.13921
																								0.65232	0.676739	0.668088		0.565492	0.599884	0.546577	0.562284	0.524865	0.4948	0.499411	0.492779	0.525173	0.547218	0.553362	0.588485	0.605582	0.648451	0.615001	0.624601	0.620666	0.594864	0.602651	0.61555	0.59159	0.583226
																								0.989364	1.08289	1.08835	1.16454	1.13501	1.03959	0.915812	0.808109	0.736392	0.640343	0.556115	0.526047	0.47349	0.4943	0.477093	0.516656	0.529093	0.527011	0.552132	0.562873	0.580278	0.630631	0.650398	0.687833	0.722858	0.73418
																								0.285989	0.303923	0.267356	0.312829	0.248509	0.290206	0.280582	0.321974	0.310243	0.305198			0.17809	0.205189	0.335113		0.219521	0.384504	0.344831	0.292375	0.249938	0.230554	0.182061	0.192618	0.0692452
																								1.27908	1.39499	1.46443	1.55062	1.65136	1.92257	2.68327					1.35633	1.37768	1.59622	1.67061	1.63855	1.63946	1.55177	1.41465	1.30065	1.30866	1.33002	1.29986	1.34872	1.3436	1.38473
																								0.795189	0.830886	0.882604	0.856778	0.874741	0.939823	0.806205	0.730679	0.670529	0.619681	0.54639	0.543295	0.601883	0.566818	0.487932	0.47749	0.482946	0.452805	0.480626	0.5304	0.473346	0.542776	0.467811	0.493328	0.54313	0.550321
																								0.763595	0.861654	0.945598	1.08585	1.21906	1.19513	1.14217	1.00995	0.956737	0.967723	0.895679	0.906141	0.904836	0.838754	0.796832	0.778486	0.780216	0.793446	0.790707	0.833599	0.812418	0.821525	0.80549	0.777159	0.725083	0.72159
																								0.891129	0.639531	0.886137	0.884715	1.04298	1.11682	1.42826	1.32303	1.11925	1.34567	1.34634	1.4723	1.53115	1.56963		1.54364	1.45824	1.68196	1.68833	1.6041	1.39491	1.40552	0.929515	0.57531	0.558785	0.621277
																								0.871864	1.06872	1.1564		1.25277	1.35969	1.31471	1.36013	1.56768	1.52825	1.44227	1.47862	1.26822	1.26406	1.2955	1.23757	1.27521	1.29559	1.30598	1.32202	1.30592	1.3605	1.38569	1.39861	1.37007	1.363
																								0.860919	0.897405	0.880394	0.924804	0.96233	0.838997	0.838719	0.899641	0.980131	1.21225	0.903137	0.845576	0.905994	0.917255	1.13435	1.05285		1.03194		1.27134	1.15779	1.35463		1.36241		1.08899
																								0.701402	0.624578	0.629051	0.596895	0.619508	0.623311	0.715853	0.685641	0.751111	0.71738	0.735002	0.761179	0.68198	0.700646	0.752527	0.798606	0.776929	0.793055	0.813477	0.886447	0.8671	0.834949	0.783032	0.727876	0.698207	0.584444
																								0.539375	0.532486	0.518249	0.57995	0.714102	0.597235	0.657769	0.653971	0.675406	0.676092	0.686654	0.719992	0.682604	0.711691	0.702551	0.703832	0.730445	0.69411	0.725094	0.652152	0.647809	0.722824	0.681557	0.748554	0.553063	0.608357
																								1.20194	1.08138	1.09302	1.06836	1.06353	1.00356	1.17665	1.04909	1.32646	1.30221	1.3693	1.42103	1.50749	1.52359	1.5236	1.58877	1.5095	1.65129	1.70865	1.66879	1.8543	1.79385	1.61429	1.21229	1.03767	1.01684
																								1.37033	1.19527	1.21394	1.29183	1.29607	1.3857	1.56949	1.66581	1.75944	1.77847	1.95208	2.04304	2.14909	2.27292	2.10814	1.94652	2.03056	2.00594	2.11047	2.25408	2.35809	2.4351	2.22099	2.24772		0.896816
																								0.310311	0.38428	0.290445	0.307246	0.309734	0.309287	0.317306	0.242454	0.241982	0.221321	0.211715	0.235636	0.244353	0.18684	0.220937	0.22797	0.144335	0.182839	0.146373	0.125977	0.199233	0.140389	0.161569	0.159725	0.132623	0.125702
																								1.21863	1.24262	1.3655	1.24301	1.04084	1.01526	0.961547	0.964918	0.987935	0.992026	0.977776	1.04766	1.21596	1.12402	1.21754	1.13399	1.20949	1.42531	1.38967	1.69053		1.82507	1.89098	2.01224	1.86721	1.72885
																								2.11993	2.11161	2.04973	2.11329	2.07733	2.08392	2.13079	2.11614	2.04983	1.97935	1.93174	1.91353	1.86527	1.93701	1.84495	1.93681	1.87986	1.79231	1.74457	1.66884	1.60003	1.60162	1.59597	1.50766	1.57758	1.55689
																									0.803233	0.839952	0.861201	0.86605	0.953612	0.947624	0.905835	0.926077	0.93611	0.893315	0.923142	0.861544	0.926235	0.940235	1.0327	1.09055	1.05295	1.17443	1.20937	1.14788	1.11073	1.12727	1.12129	1.00887	0.956309
																									1.41536	1.29568	1.24014	1.10507	0.955767	0.808718	0.747485	0.802236	0.757108	0.813341	0.811515	0.842217	0.869978	0.881272	0.916785	0.864181	0.895725	0.855082	0.823841	0.818968	0.855028	0.848115	0.890379	0.833059	0.853337
																									1.22655	1.05141	1.06863	1.11596	1.07775	1.08794	1.14153	1.0445	0.960912	0.830601	0.741486	0.693145	0.617327	0.611829	0.573051	0.543029	0.543689	0.544403	0.499944	0.510245	0.528955	0.522871	0.503907	0.553451	0.549869
																									0.886729	0.99804	0.981143	0.873196	0.90127	0.926324	1.00145	0.985124	1.07137	1.05764	1.05086	1.07125	1.17196	1.17746	1.14895	1.22929	1.19878	1.25079	1.11899	1.02482	0.959124	1.0184	1.00918	0.991666	1.05601
																									0.327167	0.418691	0.290466	0.363679	0.338349	0.316086	0.345688	0.313515	0.344975	0.33359	0.373416	0.344401	0.360698	0.337233	0.375662	0.379241	0.353057	0.355194	0.34065	0.345345	0.338414	0.381524	0.346754	0.341932	0.313511
																									0.85088	0.822284	0.795602	0.809629	0.79568	0.728868	0.767378	0.72468	0.789508	0.729805	0.738892	0.734533	0.739885	0.736967	0.750508	0.801543	0.794718	0.70638	0.695844	0.627357	0.58988	0.545352	0.536622	0.593992	0.608477
																									0.337455	0.420573	0.410487	0.393707	0.411849	0.333143	0.2842	0.248778	0.21154	0.230151	0.202511	0.210775	0.229295	0.220986	0.261303	0.254462	0.251145	0.192808	0.20312	0.175589	0.221816	0.244783	0.23054	0.252584	0.23323
																									0.567081	0.629999	0.591039	0.68702	0.757508	0.944139	1.00372	0.929713	1.06005	1.11704	1.10267	1.20962	1.16822	1.07979	1.15056	1.09799	1.05701	0.976814	0.891286	0.834988	0.790543	0.66253	0.621526	0.592304	0.569023
																									0.513879	0.674835	0.65629	0.640763	0.744356	0.761008	0.657674	0.900854	0.838272	0.863146	0.812663	0.745096	0.836325	0.792519	0.720448	0.773137	0.857336	0.828993	0.809249	0.792887	0.860872	0.882091	0.87815	0.917294	0.83755
																									0.256105	0.297672	0.334519	0.2274	0.273698	0.312951	0.46989	0.71525		0.619259	0.690654	0.750138	0.730781	0.725667	0.962739	1.01706	1.19002	1.24685	1.26586	0.91097	0.556221	0.643568	0.559762	0.672366	0.502561
																									0.545131	0.547203	0.450984		0.373863	0.379105	0.372683	0.359363	0.391681	0.376353	0.393478	0.392416	0.375148	0.33819	0.305959	0.328145	0.363074	0.326961	0.334475	0.323648	0.281072	0.294099	0.326495	0.266657	0.341614
																									0.946058	0.839873	0.91893	0.949584	1.04669	1.03647	0.990096	0.955583	1.09544	1.14434	1.28209	1.20457	1.32686	1.39643	1.22103	1.04759	0.959395	0.900514	0.885668	0.846722	0.815118	0.770563	0.848925	0.839316	0.938272
																									1.08508	0.867166	0.944715	0.91536	0.970675	1.01177	0.967263	1.01985	0.991672	1.05783	1.03443	1.05999	1.08512	1.04239	1.1284	1.16203	1.12048	1.05578	1.12074	1.08312	1.01657	1.06071	1.0214	0.983935	1.02352
																									0.867545	0.824979	0.852505	0.866	0.808804	0.862245	0.967133	1.04468	1.07895	1.03632	0.955713	0.866429	0.921669	0.897268	0.970995	1.30951	1.92542	0.794745	0.677678	0.840864				0.5717	1.49541
																									0.34621	0.337422	0.282582	0.258727	0.316265		0.340484	0.388358	0.397618		0.364698	0.41699	0.460717	0.4928	0.501637	0.509131	0.595137	0.598942	0.626084	0.531352	0.551322	0.563534	0.64283	0.70326	0.724063
																									0.874467	0.801957	0.892475	0.8478			0.680006	0.78341		0.652012	0.757416	0.602278	0.602543	0.562756	0.613434	0.57572	0.633817	0.479498	0.529805		0.47602	0.436818	0.365374		0.366199
																									1.0091	0.980398	1.03185	1.04627	0.929693	0.953901	0.871994	0.868866	0.834892	0.854864	0.797058	0.763447	0.735437	0.692999	0.793253	0.837021	0.858078	0.701094		0.866685	0.969097	0.826231	0.847908	0.938793	0.87697
																									0.734844	0.773215	0.728341	0.699547	0.655485	0.637133	0.74495	0.75871	0.762603	0.731544	0.858973		0.878245	0.871959	0.894859	0.770028	0.739307			0.611326	0.573652	0.561189	0.537107	0.605698	0.597998
																									0.580933	0.73841	0.765607		0.872533	0.890349	0.896775	0.902717	1.00711	1.12338	1.20139	1.49326	1.56988	1.42655	1.2992	1.36876	1.28591	1.12936	0.966384	0.889678		0.716387	0.783715		0.810402
																										0.144758	0.190992	0.251347	0.26341	0.2714	0.280799	0.309757	0.27064	0.292223	0.313845	0.295423	0.280047	0.340515	0.347556	0.400473	0.458659	0.474627	0.47142	0.474807	0.443717	0.483181	0.445102	0.381023	0.373369
																										0.28306	0.277917	0.314053	0.256412	0.272293	0.27435	0.285538	0.28584	0.277729	0.269611	0.247198	0.262218	0.254205	0.257894	0.276169	0.250147	0.265944	0.251426	0.267111	0.253472	0.258004	0.222372	0.240432	0.233185
																										0.950485	0.990407	0.925817	0.938981	0.974472	1.05126	0.9703	1.11068	1.13626	1.15295	1.18848	1.1228	0.983592	1.01122	0.96971	1.01356	1.02245	0.980147	1.00483	0.902894	0.923684	0.888133	0.931575	0.899104
																										0.455323	0.51501	0.549694	0.46715	0.479912	0.520278	0.551352	0.501154	0.450828	0.476984	0.397452	0.406324	0.508021	0.423706	0.442867	0.421746	0.459096	0.462017	0.417935	0.373895	0.34946	0.278595	0.371237	0.298089
																										0.574065	0.567356	0.540064	0.595181	0.651439	0.617655	0.634014	0.582849	0.553147	0.52812	0.590875	0.539948	0.702322	0.727676	0.857362	0.738749	0.815268	0.770341	0.755319	0.736313	0.675257	0.628356	0.609513	0.500797
																										0.480072	0.519933	0.511596	0.573296	0.673175	0.746183	0.776127	0.768829	0.767614	0.81223	0.800143	0.779455	0.747205	0.741957	0.726809	0.665054	0.712452	0.66454	0.685359	0.706556	0.662652	0.596946	0.585085	0.580293
																										0.785223	0.762557	0.830148	0.770482	0.805473	0.759478	0.731406	0.728411	0.704498	0.646264	0.674818	0.664595	0.628469	0.610435	0.618048	0.582397	0.593884	0.530333	0.551924	0.505957	0.581163	0.606039	0.632452	0.638721
																										0.813376	0.894722	0.665915	0.582745	0.606007		0.707321	0.646152	0.691055	0.683955	0.704516	0.742548	1.02981	0.949395	1.00176	1.05541	0.945251	0.956697	0.954847	0.949953	0.832962	0.718651	0.673404	0.679279
																										1.2285	1.11486	1.05446	1.00038	1.13249	0.979144	1.05024	0.89505	0.831894	0.86555	0.857962	0.772312	0.941952	0.924822	0.925931	0.83425	0.873374	0.825196	0.963903	0.941769	0.86703	0.954266	0.99573	1.7196
																										0.961322	0.959591	1.10317	1.01772	1.29687	1.34098				1.62225	1.48395	1.35803	1.22387	1.07359	1.0169	0.928891	0.903217	0.911353	0.843974	0.853536	0.87418	0.875387	0.885654	0.932712
																										0.582157	0.885604	1.12307	1.19454	1.31765	1.06403	0.887924	0.811582	0.678926	0.858045	0.765113	0.849318	0.888944	0.860626	0.928159	0.973163	0.838129	0.78483	0.717939	0.666401	0.660984	0.499006	0.586465	0.490574
																										1.20913	1.50833	1.51993	1.63789	2.0295	1.80766	1.39357	1.34721	1.37414	1.25518	1.21875	1.25824	1.16782	1.11393	1.24299	1.40936	1.27374	1.20636	1.32992	1.32294	1.23879	1.37732	1.18172	1.2779
																										0.664654	0.721424	0.640571		0.699003	0.760979	0.712911	0.597338	0.66304	0.569387	0.536046	0.604505	0.569363	0.56357	0.636632	0.635464	0.729589	0.732907	0.787473	0.813933	0.747225	0.812955	0.781818
																										3.29573	2.81212	2.45614	2.30144	2.53186	4.2678	3.73999	2.53754	1.6997	2.01658	1.46794	2.08697	2.07361	1.85918	1.60004	1.28154	1.23604	1.10998
																										1.15761	0.953759	1.07917			1.10055	1.09341		1.03237	0.999146	1.04428	1.11986		2.04442	1.27606	2.01202	2.33703	1.73797	2.34826		2.68533	2.28996	2.5474	1.57916
																											0.631535	0.634877	0.643256	0.595852	0.593763	0.567377	0.519424	0.5329	0.498282	0.504636	0.514688	0.549975	0.540013	0.550196	0.559846	0.575413	0.630365	0.632161	0.603419	0.540525	0.513037	0.506959	0.479691
																											1.92786	2.49684	1.93317	2.35104	2.28526	2.35277	2.53398	2.69651	2.42476	2.50337	2.07395	2.18364	2.2184	2.26967	2.1538	2.18631	2.1458	1.83773	1.51007	1.77075	1.59074	1.57337	1.31493
																											1.16936	1.12523	1.03488	1.17585	0.950887	1.11316	1.14947	0.875416	0.852008	0.851053	0.764953	0.878337	0.824709	0.735582	0.714817	0.727569	0.66249	0.695712	0.750083	0.762633	0.723044	0.676942	0.729874
																											0.695789	0.639248	0.720251	0.727237	0.806233	0.787821	0.806707	0.740904	0.822702	0.715731	0.729745	0.702447	0.738942	0.79839	0.804105	0.805059	0.76385	0.708324	0.713252	0.692478	0.703063	0.690062	0.667817
																											0.948916	0.940775	1.09559	1.11302		1.2319	1.31147	1.27144	1.38423		1.43662	1.49279	1.43331	1.39683	1.292	1.26096	1.27033	1.23691	1.16389	1.15936	1.12268	1.10961	1.10326
																											0.586418	0.622517	0.649002	0.69819		0.618863		0.669276	0.655491	0.676349	0.769125	0.724585		0.797952	0.842345	0.862397	0.864897	0.822173	0.830738	0.816947	0.802272	0.96718	0.88317
																											0.405429	0.402847	0.461541	0.574689	0.687675	0.678528	0.724889	0.786859	0.816229	0.738277	0.768944	0.706137	0.731045	0.627558	0.769285	0.802066	0.747286	0.639595	0.482694	0.443356	0.410581	0.409093	0.417277
																											0.759431	0.728765	0.74205	0.800549	0.818736	0.795838	0.871927			0.847472	0.869704	0.850957			0.771087	0.977134	0.923741				0.871748	1.02158	0.866343
																												0.991168	1.00957	1.02533	1.21698	1.53307	0.724296	0.574532	0.688528	0.533037	0.309969	0.0935313	0.630495	0.848051	1.03718	1.36152	1.50469	1.5668	1.36601	1.16928	1.04815	0.982283	0.93104
																												0.245067	0.281225	0.206775	0.186145	0.171581	0.161674	0.18889	0.177195	0.149378	0.0902381	0.154638	0.131421	0.143354	0.129097	0.110395	0.0772296	0.0353676	0.0256853	0.0947401	0.14851	0.00402524	0.00546464
																												0.896453	0.968968	0.910481	0.891894	0.964723	0.95798	0.901764	0.866971	0.966889	0.896359	1.00728	0.883014	0.869406	0.938156	0.77027	0.848722	1.06455	0.908611	1.01918	0.764392	0.900959	0.958853
																												0.804334	0.920139	0.865473	0.828106	0.874327	0.824538	0.796251	0.823656	0.896976	0.893941	0.877714	0.961844	0.916504	1.01917	1.02647	0.945134	1.12027	0.994456	1.07447	0.994838	1.16649	1.18815
																												1.08288	0.79668	0.913724	0.832656	0.847017	0.770741	0.675118	0.649451	0.684153	0.618259	0.657069	0.755518	0.772362	0.790944	0.686009	0.669061	0.638528	0.62962	0.667701	0.742961	0.685752	0.77651
																												1.09262	1.00477	1.0572	0.984085	0.988219	0.967507	0.91191	0.862386	0.82043	0.874352	0.847264	0.903737	0.921289	0.861652	0.895097	0.944079	0.906654	0.952513	0.852429	0.892901	0.855902	0.873936
																												0.89882	0.866784	0.681263	0.755001	0.697748	0.771734	0.713417	0.809511				0.570592		0.536491	0.548237	0.534474	0.57496	0.534118	0.506682	0.556507	0.528129	0.578417
																												0.447648	0.475204	0.50744	0.447413	0.483058	0.510523	0.503948	0.548328	0.614813	0.670898	0.74275	0.776294	0.786828	0.776191	0.713934	0.57487	0.561944	0.545275	0.521028	0.499453	0.456239	0.504835
																												0.40102	0.416776	0.475951	0.602249	0.62511		0.600854	0.566599			0.469833			0.70219	0.665381	0.58794	0.546969	0.489857	0.424808	0.472816	0.378557	0.391231
																												0.662229	0.749449	0.873738	1.1116	0.993402	1.29913	1.38195	1.45059	1.42246	1.24942	1.16828	1.35254	1.28134	1.35093	1.4184	1.43706	1.42788	1.37005	1.26502	1.21924	1.12322	1.10807
																												1.01983	1.16686	1.12685	0.821011	1.04103		1.05143	1.13263	1.1037	1.14344	1.18792	1.30352	1.32314			1.18		1.15278			1.16663	1.23905
																												0.859097	0.828067	0.868879		0.837674		0.778949				0.708313	0.65657	0.626882	0.700607	0.701541	0.718522	0.703314	0.740282	0.793031	0.834389	0.920833	0.874017
																													0.752422	0.666434	0.715437	0.650254	0.666584	0.619432	0.612514	0.61394	0.597356	0.600474	0.586146	0.569466	0.597076	0.595265	0.582563	0.601885	0.605155	0.583861	0.586059	0.593193	0.592555
																													1.06676	1.11446	1.07151	1.02954	0.977159	0.969311	0.915695	0.938187	0.904826	0.804205	0.857195	0.839642	0.877252	0.854921	0.741832	0.871254	0.826097	0.824734	0.870432	0.877551	0.81796
																													1.69269	1.65419	1.61248	1.64035	1.68835	1.53449	1.71786	2.00612	2.0389	2.04216	2.14557	2.25123	2.37058	1.98389	2.15163	1.79216	1.63669	1.71321	1.7286	1.71993	1.74326
																													1.00782	2.15677	0.978726	0.833884	0.901961	1.00126	0.823418	0.825585	1.00647	0.973714	1.01757	1.1088	0.948973	0.822495	0.630924	0.56162	0.501513	0.43068	0.578908	0.735553	0.752136
																														0.793071	0.668474	0.677261	0.567116	0.530735	0.509168	0.498972	0.544832	0.531053	0.567157	0.58409	0.542422	0.542324	0.517607	0.545148	0.512551	0.506946	0.539982	0.548544	0.565547
																														0.33749	0.395958	0.364514	0.418249	0.30889	0.304862		0.270182	0.237001	0.222937	0.194207	0.221854	0.196022	0.206222	0.197787	0.189893	0.218366	0.211233	0.166729	0.184789
																														1.15389	1.31522	1.10112		0.7778	0.668063	0.614597	0.701761		0.711211	0.722482	0.77118		0.751997	0.737509	0.683808	0.636134	0.625092	0.59632	0.682433
																														1.00408	1.07773	1.10182		1.18141		1.09057	1.05613	1.10015	1.10791	1.05309	1.06607	1.08968	1.08677	1.13545	1.20687	1.20089	1.19988	1.16616	1.11684
																														1.06128	1.01849	0.940896	0.847851	0.770312	0.687489	0.637945	0.550867	0.570301	0.545472	0.564527	0.564753	0.564338	0.553108	0.587414		0.710307
																														1.81773	1.81415	0.891511	0.91438	0.906144	0.866136	0.915847	0.937406		0.987076	0.989485		0.869466	0.85763	0.857157		0.829329	1.62925		0.8697
																														6.55122	4.10584	6.18672	6.3838	5.38205		3.94315	4.29209	4.3582	5.84575	6.38409	5.46747	4.92172	5.79096	1.93057	4.79075	3.83352	3.16866
																														0.964927	1.09258	0.790527				1.11398		1.12163	1.10881		1.07833	1.12448	1.11756		1.11456	1.16431	1.15219	1.09101
																														1.30472	1.53173	1.31046	0.942567	0.982696	0.8914	0.766329	0.852169	0.829115		1.33566	1.60369							1.89149	1.73633
																															0.598522	0.609539	0.587483	0.586266	0.582003	0.608087	0.542445	0.634902	0.672506	0.717991	0.75072	0.674304	0.770093	0.742554	0.879224	0.887834	0.894133	1.0407	0.979176
																															1.29598	0.849855	0.703211	0.729	1.06397	1.17126	1.08983	0.946114	0.85433	0.887996	0.930833	0.973393	0.931863	0.917581	0.914527	0.919611	0.916946	0.918053	0.863607
																															2.86745	2.26694	2.0462	2.01606	2.0924	1.31372	1.46847	1.20119	1.42531	1.37592	1.47022	1.54626	1.17374	1.71017	2.21268	2.14018	2.05469	1.95654	1.95933
																															0.948902	0.949636	0.812559	0.903096	0.911102	0.846727	0.854749	0.907503	1.04288	0.974265	1.07961	1.17609	1.20462	1.18979	1.12569	1.12151	1.03744	1.01241	1.02986
																															0.731093	0.762047	0.766487	0.824629	0.821342	0.85291	0.869055	0.89624	0.901613	0.993427	0.904706	0.925414	0.842879	0.927854	0.887328	0.837364	0.83509	0.745633	0.711383
																															0.587013	0.750045	0.727004	0.709489		0.759043	0.588113		0.53621		0.503037	0.488647	0.532944	0.52029	0.558181	0.578547	0.560702	0.623886	0.685032
																															1.13893	1.08304	1.06553	1.12025	1.0523	1.10097	1.11207	1.1788	1.24607	1.28876	1.23257	1.1654	1.01074	0.902006	0.78994	0.671711	0.610444	0.581599	0.524667
																															0.834278	0.752996	0.845333	0.857646	0.873415	0.782758	0.701838	0.666593	0.570435	0.60866	0.595475	0.585075	0.558766	0.505542	0.459319	0.489364	0.468283	0.417214	0.421715
																															0.861464	0.938933	0.906542	0.866812	0.867151	0.828772	0.745557	0.728318	0.679538	0.727189	0.672496	0.658713	0.660918	0.623718	0.577011	0.575035	0.550052	0.59414	0.666
																																0.943505	1.28088	1.62692	2.02709	2.14311	2.32125	2.25826	2.20249	1.94882	1.85126	1.80677	1.72383	1.73602	1.69481	1.80827	1.70878	1.62094	1.58273
																																0.662963	0.582694	0.78351	1.0176	1.13562	1.06749	1.13288	0.925879	0.870165	0.803962	0.876196	0.819276	0.829454	0.746408	0.729071	0.774595	0.754532	0.754601
																																0.845629	0.781778	0.784541	0.892179	0.91278	0.935948	1.05153	1.12224	1.08912	1.09057	1.07534	1.02796	1.06218	0.96854	0.952816	1.02001	0.990347	1.04797
																																0.758269	0.846392	0.813378	0.759043	0.806448	0.812875	0.903685	0.84794	0.883883	0.820242	0.744526	0.753381	0.78911	0.911863	0.864609	0.837181	0.901643	0.741357
																																0.496682	0.503557	0.522718	0.465321	0.477926	0.418532	0.440929	0.436976	0.416619	0.44161	0.407198	0.445987	0.501081	0.490101	0.478058	0.547261	0.498706	0.472421
																																1.25038	1.17725	1.21149	1.2316	1.06624	1.04695	1.03557	0.946893	0.871363	0.831837	0.847619	0.844991	0.804686	0.850731	0.855063	0.890309	0.901145	1.03021
																																0.340724	0.344004	0.384475	0.408348	0.42091	0.435368	0.429259	0.436704	0.470864	0.50085	0.519955	0.541116	0.568584	0.577144	0.574586	0.569107	0.539438	0.56922
																																2.06532	2.05508	1.75652	1.85145	1.63347	1.69835	1.55602	1.98987	1.95239	1.79248	1.89646	1.76609	1.76986	1.5009	1.80735	1.78576	1.93	2.17641
																																0.751362	0.836289	0.909652	1.02132	1.10298	1.18248	1.32661	1.43811	1.4801	1.52627	1.51412	1.44099	1.3562	1.32706	1.17532	1.04051	0.981429	1.04412
																																0.935666	0.925676	0.864445	0.831851	0.837033	0.923824	1.00997	1.13786	1.27894	1.2001	1.36501	1.3948	1.36885	1.27962	1.19403	1.3001	1.2494	1.25451
																																-0.0448759	-0.0575831	-0.070416	-0.0646568	-0.0714356	-0.0706832	-0.0863149	-0.0255004	-0.0302433	0.00556024	0.00853715	-0.00824271	0.025011	0.0214903	0.0222221	0.124403	-0.0022869	0.132072
																																0.224818	0.370325	0.516694	0.700204			0.660207				0.491934	0.46475	0.485597	0.396443	0.444437	0.417133	0.419865	0.378441
																																0.650131	0.59971	1.05605	1.34114	1.46459	1.53317	1.51488	1.21911	1.03506	1.16205	0.976852	0.895356	0.841707	0.787662	0.651497	0.666148	0.618363	0.607939
																																0.768865	0.661348	0.739762		1.05565	1.1783		0.80588	0.692428	0.567838	0.725499	0.428562	0.389358	0.38308	0.295648	0.253131	0.249127	0.525959
																																	1.22092	1.29515	1.35538	1.48061	1.70031	1.64959	1.49693	1.51586	1.52727	1.57199	1.48557	1.30458	1.21562	1.18626	1.18126	1.30263	1.29849
																																	1.43891	1.68084	2.16913	2.31792	1.83605	1.79265	1.55721	1.71254	2.10123	1.76203	2.14439	2.23373	2.1174	2.24315	2.19903	2.43752	2.16783
																																	0.472094	0.552316	0.879226	1.11946	1.20702	1.26466	1.16515	1.05922	1.00821	1.03065	1.11539	1.11504	1.13811	1.04425	1.04875	1.03801	0.997763
																																	0.809501	0.828714	0.955028	0.96914	0.97257	1.03777	0.906561	0.909618	0.822526	0.783446		0.726074	0.673725		0.892061	0.870274	0.877569
																																	0.683573	0.707758	0.767543	0.829174	0.926124	0.934356	0.872999	0.952008	0.94227	0.914681	0.86693	0.817964	0.745402	0.65035	0.719104	0.713844	0.704092
																																	0.740139	0.930411	0.604378	0.541723	0.608461	0.506055	0.694598	0.706081	0.733518	0.718609	0.761683	0.734646	0.774491	0.76533		0.751265
																																		0.763597	0.757498	0.801244	0.770552	0.864175	0.90977	0.888879	0.87083	0.864964	0.8816	0.852101	0.836173	0.807312	0.743143	0.715745	0.690902
																																		1.03431	1.08041	1.12083	1.11655	1.09491	1.04877	1.01241	0.916522	0.813833	0.787259	0.801959	0.787992	0.823914	0.799346	0.755734	0.779877
																																		1.18491	1.14129	1.12659	0.994913	1.00302	1.00032	0.988603	0.900247	0.834981	0.81292	0.801353	0.807775	0.843735	0.81232	0.837136	0.80906
																																		1.87329	2.1399	2.3197	2.38088	2.43014	2.63531	2.73963	2.47464	1.99137	2.01199	1.89948	1.73063	1.5535	1.54322	1.63235	1.60458
																																		1.2146	1.24093	1.08761	1.02052	1.01159	0.942175	0.931315	0.893731	0.926547	0.95435	1.02637	1.01578	1.13804	1.10211	1.09549	1.04059
																																		0.760218	0.729276	0.758165		0.767039			0.817995				0.796375	0.77129	0.775074	0.719067	0.792292
																																		1.22433	1.20492	1.3079	1.33432	1.34477	1.30114	1.27375	1.19043	1.1387	1.03874	1.07418	1.06198	1.02046	1.03577	1.02491	1.01484
																																			0.663608	0.619036	0.622991	1.03063	1.57086	1.66705	1.64023	1.55635	1.56495	1.59866	1.64335	1.59003	1.53819	1.35504	1.31052
																																			1.15423	1.08042	1.14567	1.38926	1.2823	1.23916	1.21317	1.24105	1.20016	1.18262	1.0934	0.981217	0.870461	0.745916	0.738944
																																			1.1038	1.12597	1.14432	1.21268	1.09028	1.24259	1.23191	1.24708	1.37929	1.30013	1.42436	1.34409	1.46744	1.54364	1.57961
																																			0.869452	0.793649	1.10867	1.54234	1.76436	1.72824	1.55412	1.43775	1.25642	1.26392	1.25018	1.22234	1.22553	1.185	1.24212
																																			1.39727	1.47544	1.33251	1.52258	1.86444	1.77997	1.74169	1.87822	1.37675	3.084	2.36894	2.19249	1.38534	2.27835	1.64625
																																			0.605615	0.602466	0.635107	0.574009	0.605665	0.536392	0.525327		0.348077	0.388143	0.404257	0.44143	0.425229	0.324018	0.510433
																																			0.591776	0.55835	0.656071	0.605031	0.585566	0.598975	0.595426	0.545212	0.512225	0.548659	0.470889	0.438592	0.430995	0.376745	0.390035
																																			1.41872	1.435	1.54429	1.47601	1.64518	1.61906	1.67221	1.70763	1.7663	1.7841	1.72901	1.73245	1.66966	1.57374	1.50968
																																				0.956344	1.08564	1.07919	1.14671	1.2145	1.02189	0.884216	0.668928	0.74991	0.634589	0.665459	0.586596	0.603181	0.594968
																																				0.529715	0.545125	0.461554	0.482673	0.462079	0.439798	0.416054	0.408973	0.40576	0.400731	0.393612	0.445602	0.501524	0.50737
																																				0.636652	0.574928	0.567675		0.553508	0.554105	0.52378	0.517907	0.547897	0.510969	0.508024	0.460673	0.510923	0.558817
																																				0.896824	0.953423	0.905798		0.976818	0.942231	0.955617	0.932074	0.996876	0.987283	0.988708	1.02291	1.06615	1.12847
																																					0.435618	0.479464	0.482076			0.491302	0.523443	0.47254	0.49588	0.471584	0.509772	0.50813	0.501805
																																					0.51143	0.473649	0.579368	0.551245	0.492409	0.475816	0.511029	0.444274	0.499279		0.459496		0.433878
																																					0.690356	0.902164	0.920854		1.28174	1.43302	1.25469	1.458	1.48925	1.47731	1.38343	1.45311	1.42954
																																					0.924186	0.882112	1.00246	0.968202	1.08104	0.988205	1.12562	1.25674	1.31755	0.97701	1.09073	0.909602	0.765694
																																						1.12253	0.739101	0.9823	1.10632	1.00911	1.17612	1.84663		1.65124	1.32338	1.26514	1.21468
																																						0.985452	0.820397	0.719227	0.675762	0.643119	0.579172	0.513113	0.443238	0.424506	0.403146	0.417323	0.453059
																																						0.409678	0.392537	0.425286	0.368722	0.331699	0.343033	0.363115	0.327289	0.27229	0.275943	0.290915	0.300643
																																						1.08593	1.05657	1.02308	1.02271	1.02958	0.969397	1.01077	0.946608	0.979639	0.978839	0.991868	1.01625
																																						0.922372	0.941545	1.02262		0.800431			0.751677		0.681624	0.67933
																																						0.885573	0.83184	0.748591			0.629409		0.60026	0.591662	0.555868	0.57377	0.607095
																																							0.689013	0.725206	0.731804	0.679621	0.568796	0.614384	0.580862	0.595802	0.570618	0.533068	0.558925
																																							0.913563	0.86971	0.873359	0.841399	0.78348	0.799101	0.713071	0.698527	0.746987	0.762424	0.711283
																																							1.52249	1.60306	1.4223	1.41926	1.20767	1.3489	1.27791	1.28906	1.30141	1.28628	1.2317
																																							1.41617	1.07291	1.11935	1.15623	1.16909	1.17816		1.11939	1.11697	1.21326	1.21306
																																							0.580476	0.56145	0.51018	0.465985	0.490818	0.469303	0.439173	0.426095	0.407686	0.420017	0.460546
																																							1.19857	1.02873	1.11419	1.2424	1.26107	1.26859	0.903638	0.906665		1.05673	0.949929
																																							0.696119	0.658944	0.733019		0.731222	0.708504	0.713468	0.703069	0.713574	0.69341	0.729968
																																								0.43658	0.405857	0.366665	0.327242	0.298424	0.270654	0.310412	0.307795	0.322798	0.33069
																																								1.10409	1.16956	0.977248	1.33715	1.77617	1.96653	1.88263	1.61107	1.5692	1.50173
																																								1.57929	1.45566	1.62153	1.5059	1.43779	1.53625	1.50314	1.63721	1.79775	1.6247
																																								1.36455	1.37091	1.38608	1.25947	1.10939	1.1125	1.04123	1.02279	0.916211	0.905262
																																									0.436992	0.519156	0.582681		0.729573	0.83637	0.823711	0.785745	0.786066
																																									1.22775	1.08376	1.19605		1.16089	1.12315
																																										0.408824	0.451914	0.528643	0.486302	0.467762	0.574769	0.651971	0.612733
																																										1.51097	1.47937	1.39067	1.31097	1.46458	1.39067	1.4007	1.51296
																																											0.513152	0.439532	0.405893	0.482834	0.435202	0.474747	0.439465
																																											0.501765	0.53937	0.512554	0.538239	0.508462	0.530629	0.516037
																																											0.705756	0.674292	0.677264	0.708775	0.750368	0.830975	0.885499
																																											0.506547	0.492163	0.421186	0.475105	0.49703	0.55942	0.56456
																																											1.13554	1.2144	1.26503	1.31827	1.20079	1.2139	1.15501
																																												0.39036	0.401227	0.244459	0.254328	0.283183	0.234074
																																												1.48432	1.40428	1.26237	0.957181	0.953998	0.943183
																																													0.75418	0.948432	0.798055	0.800937	1.0966
																																													0.782901	0.761634	0.790413	0.865292	0.970095
																																													1.65641	1.67676	1.78021	1.95044	2.0719
																																														1.02066	1.02734	0.979641	0.929132
																																														0.558825	0.50068	0.569108	0.520087
																																														0.831509	0.865104	0.846677	0.809832
																																														0.402506	0.440833	0.380838	0.460807
																																															1.45692	1.43486	1.56057
																																															0.764176	0.831677	0.812391
																																															0.540845	0.945672	1.11881
																																															1.47304	1.28233	1.24055
																																																0.795724	0.859896
																																																0.896923	0.867691
																																																1.36065	1.44351
																																																0.488787	0.495063
																																																0.614809	0.672403
																																																0.892432	0.919385
																																																	0.995045
																																																	0.782514
																																																	0.493556
																																																	0.590526

1.11925	1.08912	1.08183	1.20417	1.24242	1.25529	1.25613	1.13751	1.03705	0.87596	0.805059	0.788422	0.812433	0.830803	0.860766	0.979048		1.07833	1.21368	1.67488	1.33517	1.45419	1.44661	1.44797	1.4662	1.41748	1.48725	1.3934	1.29341	1.29621	1.325	1.1453	1.22074	1.18539	1.19066	1.20263	1.18784	1.26307	1.14587	1.19189	1.20842	1.03346	1.2117	1.06991	1.01729	0.943205	1.0845	1.14466	1.10699	1.18619
0.86151	1.04599	0.733143	0.961918	0.779006	0.855108	0.960691	1.02698	1.11536	1.32371	1.39101	1.51781	1.68492	1.82113	1.83243	1.66273	1.62346	1.67862	1.4141	1.58649	1.40447	1.46791	1.29346	1.31854	1.13546	1.1223	1.15982	1.15681	1.15198	1.1473	1.13627	1.06655	1.06936	1.13493	0.977976	1.1819	1.15311	1.22311	1.16657	1.24434	1.27294	1.30735	1.358	1.46656	1.64138	1.76366	1.74956	1.73244	1.85666	1.88357
1.66822	1.67801	1.86163	1.81977	1.61085	1.81644	1.39622	1.39268	1.661	1.74638	1.79545	1.7629	1.91253	1.76542	1.66813	1.42823	1.50099	1.55486	1.37957	1.23227	1.18423	1.29939	1.34438	1.37361	1.37088	1.46634	1.54611	1.49849	1.50357	1.84423	2.14368	2.45628	2.54204	2.91024	2.79136	2.599	2.87938	2.83862	3.07849	3.11913	2.8598	2.89386	2.78654	2.77993	2.5575	2.40914	2.19906	1.96966	1.75367	1.62619
1.0486	1.06141	1.06834	1.04354	1.02951	1.04107	1.08045	1.08904	1.0274	1.07228	1.1144	1.12055	1.09396	1.12936	1.08145	1.07955	1.06665	1.05682	1.05541	1.04316	1.05695	1.04876	1.05279	1.05598	1.03767	1.04248	1.05076	1.06738	1.06969	1.10211	1.07284	1.10828	1.08377	1.11953	1.15863	1.15133	1.17104	1.13243	1.12156	1.09849	1.1349	1.16365	1.17778	1.17769	1.15221	1.09725	1.05365	0.99026	0.953232	0.967985
1.08098	1.02105	1.06314	1.05142	1.01721	0.980846	1.13205	1.12223	1.24306	1.17492	1.29977	1.37329	1.45187	1.44494	1.5737	1.64433	1.70078	1.62506	1.59851	1.62302	1.41862	1.30332	1.0899	1.13048	1.07285	1.08686	1.10618	1.15987	1.04114	1.06519	1.10935	1.17117	1.16717	1.14483	1.13763	1.08459	0.994451	0.958527	0.94994	0.94964	0.901607	0.942811	0.890088	0.92842	0.909972	0.920809	0.943324	0.942707	0.97896	0.999167
1.92443	2.36564	2.11632	1.99425	2.00089	2.84339	2.40605	1.80121	1.95649	2.2171	1.81899	1.99504	1.99273	2.18656	1.827	1.87875	2.10384	1.83883	2.11357	2.10889	1.9382	1.87467	2.06359	2.25229	2.55892	2.83943	3.45014	3.75943	4.00141	3.64457	3.33456	3.04741	2.62676	2.49172	2.30264	2.14429	2.09529	2.12368	1.90599	1.79537	1.85261	1.57346	1.40787	1.31916	1.39959	1.6535	1.67378	1.70758	1.76164	1.77551
0.561158	0.690866	0.77571	0.81077	0.85285	0.89946	1.07465	1.1283	1.10932	0.988844	0.969113	0.914815	0.963434	0.976338	0.960283	0.909156	1.00024	1.03212	0.990067	1.09512	1.0249	1.08752	1.0736	1.13072	1.0924	1.08234	1.07322	1.12239	1.14677	1.05801	1.14233	1.18987	1.2273	1.09446	1.0948	0.995277	0.937828	0.929644	0.99672	1.03825	0.89402	0.890632	0.93105	0.910725	0.854492	0.942382	0.986153	0.983615	1.00313	0.987795
0.993294	0.956936	0.936596	0.912796	0.821179	0.81233	0.779112	0.774806	0.687145	0.671535	0.717779	0.777947	0.874483	0.935561	0.931251	0.972191	1.03978	1.11403	1.07828	1.04881	0.998754	1.00426	0.954781	0.899442	0.888433	0.854369	0.783822	0.793589	0.797099	0.846269	0.913182	0.894764	0.861982	0.799656	0.759344	0.698935	0.683981	0.641905	0.598293	0.580001	0.579372	0.563453	0.557689	0.562324	0.52176	0.558933	0.562211	0.56117	0.603681	0.62064
0.545974	0.558755	0.578786	0.726742	1.0294	1.11733	0.94927	0.894142	0.878382	0.915034	0.85097	0.883437	0.861188	0.825169	0.810966	0.843543	0.883981	0.827035	0.772812	0.690197	0.71155	0.713783	0.749489	0.836551	0.828278	0.847047	0.880745	0.898281	0.894313	0.876361	0.865617	0.846624	0.857775	0.842546	0.883103	0.883631	0.899271	0.922487	0.878815	0.811954	0.840995	0.877704	0.855364	0.815837	0.787606	0.83649	0.806302	0.78578	0.801776	0.81671
1.57469	1.60439	1.56503	1.59825	1.63314	1.59338	1.62344	1.65628	1.70057	1.62246	1.59097	1.47223	1.39762	1.51403	1.42831	1.36071	1.36553	1.3778	1.30258	1.42945	1.36068	1.26813	1.22994	1.15992	1.13051	1.11515	1.0911	0.99235	0.978341	0.946531	0.96373	0.98326	0.934585	1.02169	1.0532	1.07109	1.02927	1.00929	1.00044	0.980062	0.904434	0.92307	0.696162	0.719272	0.706834	0.737806	0.966404	0.729267	0.757988	0.841204
0.538125	0.495015	0.37633	0.299829	0.253178	0.226353	0.238112	0.226854	0.258284	0.273291	0.292657	0.319117	0.358058	0.435406	0.439465	0.510243	0.562418	0.656855	0.692792	0.804859	0.746163	0.72213	0.812316	0.840388	0.937181	1.00956	1.11981	1.0536	1.04446	1.02622	0.974623	0.88834	0.872879	0.70643	0.752875	0.741756	0.777433	0.760371	0.810103	0.740612	0.805264	0.895471	0.960937	1.00163	1.02203	1.04671	1.17099	1.29842	1.29431	1.26926
0.693842	0.649262	0.654229	0.659463	0.611609	0.637417	0.651519	0.681164	0.690111	0.766138	0.783574	0.803219	0.854683	0.912493	0.933172	0.91453	0.987295	1.057	1.04639	1.1076	1.10587	1.06451	1.04243	1.17326	1.30833	1.35778	1.41116	1.45009	1.40195	1.24093	1.07803	1.03295	0.719978	0.751666	0.744201	0.762262	0.791072	0.649195	0.606455	0.69073	0.735484	0.642293	0.556085	0.532163	0.471385	0.46971	0.451138	0.421628	0.434554	0.430252
1.08271	1.30569	1.3071	1.25907	1.23028	1.27624	1.28475	1.69915	1.18212	1.80411	1.78652	1.45193	1.84553	1.7424	1.55032	1.45432	1.4484	1.61789	1.41964	1.47114	1.42484	1.39195	1.27387	1.27245	1.19467	1.08359	1.03626	0.934745	0.87747	0.832621	0.792327	0.750013	0.741675	0.801724	0.693491	0.674979	0.639309	0.684755	0.687508	0.667784	0.721052	0.710719	0.601372	0.726502	0.696757	0.681997	0.750282	0.764492	0.801152	0.840104
0.909362	0.841958	0.800341	0.786653	0.682097	0.787129	0.705784	0.716925	0.782098	0.905679	1.00475	1.0804	1.13731	1.32705	1.39506	1.49137	1.35998	1.38542	1.36155	1.32462	1.29235	1.28529	1.24456	1.25546	1.3693	1.40955	1.44757	1.50255	1.72924	1.89559	1.89112	1.9294	1.86113	1.79101	1.66362	1.70471	1.65425	1.62428	1.49843	1.46009	1.31149	1.28252	1.20716	1.19555	1.18621	1.19516	1.14167	1.1543	1.18087	1.14063
0.801401	0.860618	1.01749	0.959088	1.01463	0.922586	0.938331	0.99293	1.01411	0.884383	0.964075	1.57425	1.80839	1.53878	1.42046	0.778904	1.7063	1.08352	1.11254	1.04862	1.29393	1.45699	1.5651	1.62826	1.39625	1.40815	1.47065	1.5997	1.57335	1.62215	1.80675	1.88713	1.91226	1.87277	1.84101	1.7932	1.75474	1.59453	1.50005	1.47108	1.39658	1.30835	1.20275	1.26523	1.17684	1.17135	1.24991	1.22038	1.28679	1.24372
0.761856	0.716304	0.805438	0.817117	1.00331	1.01688	0.952202	0.924838	0.902852	0.944203	0.952432	1.06211	1.14084	1.22404	1.09732	1.13914	1.07333	1.12547	1.09213	1.08829	1.05361	0.97843	0.941255	0.886556	1.04918	1.05581	1.10647	1.09887	1.18065	1.16855	1.22959	1.30135	1.4007	1.42777	1.53508	1.60943	1.72172	1.72745	1.79086	1.87787	1.89166	1.76213	1.68584	1.58586	1.51997	1.40423	1.357	1.24712	1.19844	1.14724
1.10227	1.14444	1.14783	1.24349	1.37473	1.48259	1.51372	1.76942	1.75467	1.67703	1.75293	1.672	1.58853	1.59053	1.43562	1.39372	1.32348	1.24079	1.18213	1.02965	1.00411	0.994275	0.889174	0.837601	0.788689	0.787684	0.829448	0.848436	0.808622	0.784739	0.815483	0.813321	0.84561	0.856704	0.854525	0.80459	0.776187	0.765134	0.730096	0.732025	0.67156	0.653232	0.554183	0.508364	0.483172	0.49541	0.494396	0.489627	0.517501	0.560823
0.5637	0.5632	0.574568	0.591749	0.675793	0.677638	0.71054	0.741138	0.786251	0.835145	0.81032	1.06322	1.138	1.33347	1.47391	1.49257	1.39694	1.27459	1.1728	1.00505	1.0433	1.02572	1.02096	0.943447	0.905656	0.850113	0.875336	0.848099	0.762814	0.719746	0.755717	0.816341	0.849637	0.865594	0.873015	0.783428	0.789552	0.811254	0.831874	0.8333	0.807754	0.818979	0.781504	0.770268	0.788738	0.788217	0.786286	0.730888	0.705468	0.736358
0.992052	1.01188	1.02303	1.09538	1.03485	1.22682	0.645632	0.640233	0.595826	0.545909	0.395558	0.36154	0.355413	0.387699	0.395137	0.443059	0.442151	0.480352	0.52459	0.660747	0.578568	0.946625	1.14667	1.2031	1.25617	1.2922	1.33142	1.38527	1.48719	1.58731	1.66202	1.67317	1.75895	1.69691	1.79259	1.71303	1.71525	1.62372	1.54406	1.40106	1.38697	1.38608	1.32018	1.27025	1.22128	1.20099	1.18195	1.18964	1.20903	1.23017
0.882337	0.843239	0.78964	0.681654	0.607836	0.594065	0.512363	0.460661	0.389859	0.379652	0.382484	0.364757	0.403395	0.478508	0.509279	0.503023	0.553447	0.560961	0.518229	0.584947	0.530506	0.504257	0.503038	0.480038	0.522871	0.575237	0.631799	0.677228	0.757142	0.840283	0.907127	0.954848	0.960845	1.0187	1.11278	1.19682	1.1865	1.15608	1.06019	0.973699	0.83799	0.80645	0.734592	0.66401	0.627075	0.605384	0.58248	0.605217	0.593286	0.563914
0.701419	0.748191	0.856499	0.929246	1.06104	1.07063	1.08372	1.0252	1.02152	1.05275	1.03927	1.10092	1.18289	1.18579	1.13961	1.11329	1.06728	1.13079	0.993451	1.03025	1.12326	1.14037	0.988964	0.902199	0.890209	0.887673	0.892579	0.961054	1.00248	0.976137	0.926654	0.878061	0.906346	0.93167	0.95471	1.00011	1.01808	1.00845	0.988766	0.997904	1.00889	0.906355	0.832706	0.800144	0.790655	0.644099	0.618085	0.691659	0.715801	0.656066
0.482131	0.50469	0.477321	0.486361	0.491742	0.482596	0.468474	0.484992	0.489749	0.490248	0.500427	0.470796	0.482272	0.502612	0.526365	0.500959	0.536873	0.526154	0.52857	0.499256	0.478203	0.431312	0.397748	0.387706	0.43634	0.417199	0.44306	0.456376	0.517147	0.515896	0.546181	0.525435	0.525185	0.585985	0.60661	0.604316	0.620991	0.685284	0.666785	0.697349	0.680394	0.638762	0.634054	0.584019	0.582374	0.549198	0.566163	0.585539	0.59279	0.588227
1.08488	1.13682	1.13093	1.07154	1.09537	1.24521	1.31377	1.27209	1.27081	1.30018	1.30697	1.28619	1.22653	1.31808	1.3246	1.12459	0.982006	1.00601	1.05867	1.07635	1.16792	1.30556	1.29348	1.18549	1.17078	1.1941	1.23085	1.12221	1.16527	1.19318	1.18394	1.21018	1.2188	1.2002	1.3119	1.34962	1.35105	1.48244	1.50123	1.58663	1.49812	1.49762	1.45825	1.35934	1.28752	1.33111	1.33487	1.31454	1.25199	1.10954
0.299741	0.334207	0.335745	0.378881	0.451328	0.417842	0.440315	0.442303	0.427184	0.471468	0.450509	0.493327	0.511092	0.511915	0.546581	0.512879	0.596241	0.548541	0.531725	0.568592	0.480654	0.554335	0.596077	0.577573	0.621485	0.717303	0.791824	0.83153	0.898816	0.884991	0.905869	1.00527	1.03443	1.06554	0.981865	0.85018	0.740527	0.656956	0.63587	0.650253	0.607397	0.602351	0.604068	0.655925	0.99931	1.87971	0.769736	0.747652	0.686046	0.484771
1.21392	1.16113	0.926907	0.978502	0.941589	1.08552	1.12508	1.08054	0.994678	0.955018	0.878823	0.918584	0.97764	1.0283	1.00554	1.00896	1.06962	1.1644	1.13129	1.04505	1.07254	1.09072	1.17288	1.23405	1.26232	1.28373	1.41582	1.40025	1.42631	1.46107	1.42191	1.37724	1.09021	0.981822	0.879265	0.903705	0.866418	0.793691	0.863581	0.812513	0.813039	1.00871	0.983674	1.01766	1.11662	1.24025	1.29611	1.23327	1.23315	1.17378
0.707201	1.08941	1.08033	1.11631	0.928405	0.736784	0.645313	0.635741	0.66534	0.632791	0.62154	0.559461	0.552291	0.545661	0.582199	0.504082	0.561632	0.535791	0.537318	0.550284	0.553192	0.569083	0.528448	0.512763	0.439515	0.431013	0.44903	0.516017	0.57255	0.6201	0.640432	0.683979	0.671599	0.655315	0.649105	0.623772	0.564246	0.531563	0.510298	0.531029	0.536309	0.513125	0.548581	0.611752	0.58338	0.66085	0.630485	0.574581	0.609429	0.599566
0.367453	0.329102	0.335131	0.354631	0.380663	0.389605	0.491026	0.464448	0.504208	0.519196	0.536392	0.507488	0.598454	0.576192	0.610796	0.617558	0.666277	0.638541	0.650719	0.656791	0.61578	0.747347	0.693496	0.53543	0.720785	0.605866	0.568147	0.534252	0.597742	0.661212	0.669914	0.698992	0.777622	0.759015	0.728498	0.693496	0.661918	0.679941	0.659643	0.683059	0.642469	0.63497	0.559308	0.529888	0.5759	0.576281	0.638966	0.620863	0.613739	0.613533
1.16044	1.15466	1.2653	1.1625	1.21548	1.22895	1.39029	1.40523	1.33356	1.3141	1.30952	1.26888	1.33138	1.34687	1.37058	1.27663	1.2477	1.10018	1.17747	1.18549	1.11801	1.09579	0.991698	0.963099	0.972112	0.944501	0.929942	1.03162	1.09017	1.13393	1.15821	1.14453	1.12731	1.10335	1.0311	1	0.947457	0.853187	0.853392	0.844266	0.732092	0.710331	0.648441	0.625201	0.628357	0.63002	0.619973	0.633357	0.629004	0.645201
0.876158	0.916283	0.895404	0.956587	0.924919	0.987904	1.02346	1.05859	1.0974	1.08629	1.15768	1.16285	1.17217	1.10427	1.0746	1.07372	1.01685	1.08421	1.01543	0.986579	0.958033	1.05439	1.06946	1.05646	1.02115	0.999833	1.01045	1.08248	1.03428	0.994393	0.966739	0.950028	0.932266	0.878738	0.91043	0.883291	0.881836	0.827622	0.826088	0.827964	0.855124	0.874676	0.83447	0.912492	0.883756	0.919433	0.934379	0.962456	0.944824	0.951167
1.23254	1.36301	1.40999	1.45237	1.43144	1.45795	1.4147	1.41936	1.46523	1.35112	1.39165	1.30527	1.19545	1.1105	1.20802	1.16539	1.1453	1.20583	1.19543	1.22707	1.24111	1.24555	1.22166	1.34474	1.25522	1.27133	1.3648	1.41003	1.45528	1.43488	1.37244	1.35531	1.36532	1.37509	1.32802	1.31177	1.31759	1.33318	1.32139	1.34189	1.28199	1.41212	1.43088	1.44498	1.41684	1.40261	1.48582	1.42715	1.34377	1.12535
0.686814	0.831559	0.898943	0.925362	0.888042	1.00936	1.03949	1.00651	0.99918	0.933657	0.938813	0.943141	0.880177	0.865627	0.789218	0.750598	0.773105	0.825945	0.86876	0.843306	0.859698	0.852475	0.87894	0.914296	0.936754	0.899988	0.937697	0.855394	0.857973	0.771481	0.814346	0.830921	0.818992	0.738896	0.749864	0.770467	0.703405	0.756919	0.718206	0.724764	0.714994	0.69655	0.660792	0.679807	0.602263	0.553351	0.582073	0.522381	0.535574	0.544304
0.606366	0.536867	0.604608	0.572464	0.784585	0.954891	1.11694	1.16751	1.24466	1.34053	1.33153	1.60584	1.70653	1.72749	1.65714	1.77742	1.76019	1.63294	1.68152	1.81666	1.80617	1.98734	1.85956	1.52639	1.37626	1.36292	1.20025	1.27218	1.33845	1.36802	1.50663	1.56978	1.93216	1.77524	1.48956	1.69367	2.03742	2.20229	2.52624	2.75517	2.26686	2.15444	1.80473	1.61929	1.57657	1.53108	1.63881	1.68759	1.92655	2.17357
0.629628	0.716534	0.813772	0.848957	0.783	0.835432	0.868065	0.786809	0.813272	0.769419	0.726381	0.682053	0.824527	0.939936	1.02896	1.19339	1.38348	1.23766	1.20976	1.33069	1.20685	1.42376	1.31687	1.24392	1.36025	1.3052	1.32265	1.28327	1.27099	1.29678	1.19592	1.11885	1.05449	1.06961	1.15245	1.26355	1.20644	1.24241	1.14619	1.19119	1.14249	1.07967	1.09672	1.05931	0.989837	0.935363	0.897028	0.907988	0.94128	0.869902
1.29584	1.25104	1.37184	1.10688	1.86423	2.03999	2.58403	2.60861	2.59668	2.89869	3.08551	2.46389	2.50835	3.88474	4.25439	3.96461	3.49502	4.04856	3.08227	1.77548	1.83778	1.62807	1.4138	1.27903	1.12743	1.14893	1.09422	1.14316	1.03679	1.12611	1.23272	1.46592	1.81854	1.73563	1.8579	1.75659	1.84532	2.09212	1.97678	1.66175	1.28387	1.5226	1.0639	1.12556	1.13768	1.16569	1.11368	1.02486	1.03775	1.07373
0.442145	0.485328	0.573748	0.564545	0.54027	0.549082	0.576876	0.558063	0.537099	0.447414	0.417239	0.422096	0.411684	0.464529	0.47016	0.520397	0.577728	0.603185	0.634579	0.674624	0.695211	0.647628	0.648676	0.594596	0.55925	0.603862	0.572038	0.510618	0.505951	0.501527	0.54311	0.541615	0.463391	0.516048	0.482915	0.437479	0.397156	0.399284	0.398889	0.409543	0.374422	0.405401	0.454581	0.390863	0.451834	0.475429	0.472481	0.455495	0.480729	0.546011
0.407831	0.464465	0.501403	0.517079	0.536118	0.620333	0.651834	0.707434	0.767901	0.789723	0.823626	0.937832	0.9524	1.07689	1.0867	1.08807	1.02371	0.977041	1.0384	0.949483	0.92261	0.872627	0.907102	0.843271	0.79905	0.768679	0.782729	0.785994	0.797052	0.810985	0.776125	0.792827	0.805599	0.796344	0.792841	0.798409	0.799972	0.830998	0.835018	0.840516	0.810346	0.753648	0.77185	0.725883	0.728582	0.721321	0.792629	0.812915	0.810718	0.901931
0.912698	0.878827	0.982796	0.889877	0.801335	0.738544	0.71206	0.684723	0.605815	0.546542	0.56665	0.508765	0.432436	0.476332	0.433683	0.461702	0.510632	0.682124	0.744425	0.707015	0.59487	0.656485	0.530733	0.556366	0.456245	0.506636	0.631365	0.701456	0.740992	0.805365	0.774141	0.871577	0.897282	0.895214	0.862238	0.846726	0.868428	0.811302	0.664144	0.615115	0.579094	0.572649	0.57988	0.631015	0.610499	0.612209	0.573767	0.555419	0.557171	0.48553
0.262157	0.221532	0.232604	0.317729	0.434116	0.354319	0.45395	0.501813	0.435335	0.418794	0.431387	0.37773	0.326982	0.363838	0.310645	0.33604	0.388782	0.343101	0.351583	0.319136	0.385596	0.37682	0.395642	0.39122	0.383685	0.339036	0.337887	0.284243	0.310837	0.333462	0.8679	0.559397	0.461488	0.455625	0.441092	0.445066	0.444638	0.369434	0.3816	0.417891	0.411485	0.390178	0.496446	0.477649	0.464689	0.529622	0.542894	0.561724	0.583826	0.566122
0.241622	0.186235	0.207652	0.223947	0.285937	0.285281	0.292451	0.336017	0.389662	0.40699	0.462907	0.503643	0.585598	0.627046	0.638921	0.64506	0.659073	0.609122	0.66879	0.582807	0.597869	0.666279	0.706205	0.734438	0.721255	0.76571	0.740388	0.740924	0.750183	0.781202	0.757531	0.762519	0.763747	0.790915	0.780892	0.742335	0.740747	0.758597	0.676395	0.648252	0.597798	0.616674	0.582391	0.649631	0.674938	0.69745	0.678115	0.653119	0.592423	0.629598
0.581005	0.524814	0.467698	0.435885	0.524849	0.506634	0.539842	0.553096	0.605494	0.656428	0.679112	0.688253	0.797374	0.800957	0.845569	0.996624	1.07494	1.08412	1.13541	1.08603	1.15989	1.05013	1.09898	1.12475	1.09838	1.21728	1.25721	1.25046	1.34499	1.41833	1.44277	1.48143	1.49601	1.47202	1.4404	1.49662	1.43519	1.36753	1.25531	1.11218	1.06784	1.07958	0.92312	0.928319	0.857384	0.831967	0.832539	0.848629	0.878865	0.877751
0.619151	0.603602	0.666744	0.688386	0.523826	0.738868	0.747285	0.660845	0.66791	0.876165	0.784172	0.874361	0.890834	1.05786	0.819332	0.763322	0.601307	0.608844	0.632128	0.741472	0.73371	0.818334	0.923363	0.934707	0.919405	0.949347	1.02435	1.00348	0.973854	0.78813	0.910333	0.824527	0.771061	0.743951	0.834179	0.805976	0.744901	0.809575	0.786419	0.72789	0.813521	0.925974	0.815801	0.845901	0.832122	0.990205	1.04642	1.10868	0.961156	1.06762
0.18141	0.250229	0.333163	0.411688	0.470002	0.568941	0.664219	0.750679	0.936766	1.01383	1.06622	1.02668	1.00859	1.05779	0.927414	0.900241	0.742966	0.698956	0.66679	0.611996	0.637246	0.578661	0.624181	0.5609	0.579991	0.551983	0.637067	0.705583	0.771947	0.799124	0.893657	0.84617	0.829633	0.902489	0.843814	0.824429	0.850249	0.774832	0.799983	0.689875	0.660273	0.669459	0.616112	0.589376	0.576424	0.581263	0.517408	0.479548	0.477251	0.482953
0.625036	0.542731	0.472563	0.485499	0.534197	0.488521	0.546338	0.500073	0.468656	0.456367	0.432375	0.461962	0.533581	0.488979	0.549243	0.480983	0.562508	0.5834	0.609809	0.670913	0.729526	0.707658	0.732852	0.691848	0.774084	0.822366	0.837365	0.884148	0.895741	0.908714	0.864865	0.892617	0.794403	0.812073	0.805182	0.805507	0.858054	0.838783	0.861413	0.823628	0.788004	0.807902	0.714833	0.647518	0.61053	0.60584	0.521566	0.533256	0.563948	0.558933
0.564851	1.00953	0.814462	0.620485	0.65251	0.838811	0.64356	0.614946	0.686114	0.743502	0.999406	1.15831	0.977256	0.962363	1.42486	1.05123	1.11716	1.01002	1.09243	0.9749	0.89647	0.95543	1.05694	1.02696	0.912781	0.977486	1.04975	1.03983	0.870856	0.985123	1.03073	0.927927	0.88551	0.92398	0.946727	0.784239	0.887724	0.69149	0.638846	0.689859	0.534284	0.6016	0.618382	0.79	0.81616	0.794125	1.00507	1.10624	1.0938	1.07221
0.963151	0.900434	0.932316	0.893959	0.914638	0.951995	0.908837	0.941034	0.996074	1.0023	0.951823	1.10384	1.06955	1.16092	1.11676	1.13384	1.16699	1.34082	1.24021	1.29487	1.53592	1.59605	1.59751	1.6519	1.52928	1.37752	1.4147	1.31585	1.40986	1.43557	1.33202	1.15893	1.05402	0.944932	0.898446	0.887515	0.813657	0.818	0.773165	0.779076	0.722234	0.774846	0.771374	0.827955	0.8166	0.809712	0.797497	0.764786	0.757636	0.740004
0.654355	0.684662	0.838405	0.923069	1.00677	0.950159	0.908846	0.929442	0.844864	0.878507	0.815355	0.803941	0.804007	0.828085	0.862421	0.863076	0.876662	0.878048	0.811213	0.718589	0.703378	0.62889	0.595668	0.621349	0.598522	0.532986	0.57037	0.515648	0.643123	0.721536	0.749725	0.660528	0.61905	0.62825	0.598317	0.6391	0.729516	0.728919	0.690852	0.582952	0.703334	0.661344	0.593073	0.607302	0.64825	0.581998	0.575832	0.672483	0.604147	0.559026
1.15018	1.14	1.11518	1.26546	1.30098	1.34636	1.27158	1.31189	1.26438	1.29244	1.25821	1.47431	1.34979	1.40523	1.31119	1.40103	1.35623	1.34416	1.31437	1.2575	1.12765	1.17888	1.18968	1.27094	1.23483	1.26957	1.33971	1.47332	1.61677	1.53847	1.54013	1.61049	1.60311	1.63228	1.5287	1.44033	1.15199	1.01052	0.89192	0.816052	0.767405	0.768569	0.727	0.717553	0.685587	0.691531	0.691109	0.688398	0.669368	0.693393
0.530211	0.561688	0.610113	0.636586	0.696543	0.685659	0.709381	0.694934	0.685558	0.679249	0.684309	0.664032	0.737773	0.734468	0.743315	0.733212	0.726951	0.697055	0.718682	0.737477	0.69797	0.751253	0.715001	0.701273	0.687414	0.711376	0.649576	0.627818	0.6211	0.616931	0.654721	0.72982	0.866028	1.28249		0.625996	0.749138	0.585704	0.423097	0.524232	0.375852	0.633594	0.829863	0.88345	0.920788	0.820636	0.809782	0.765224	0.717443	0.688866
0.65157	0.643718	0.566828	0.613178	0.63084	0.605769	0.574395	0.600453	0.639087	0.666258	0.662644	0.736715	0.700254	0.630278	0.651315	0.633644	0.646791	0.644368	0.669251	0.676938	0.792699	1.00074		0.926252	0.849472	0.862336	0.975952	0.960992	0.994786	1.17056	1.2106	1.39056	1.41793	1.32189	1.38975	1.4385	1.5038	1.51703	1.41646	1.39844	1.29561	1.17901	1.15909	1.11644	1.09704	1.02441	1.01339	1.02237	1.06234	1.11447
0.694364	0.665045	0.584402	0.53281	0.556393	0.538003	0.498608	0.493207	0.595978	0.543033	0.645792	0.668402	0.729997	0.678723	0.722958	0.79122	0.727227	0.674778		0.706973	0.715473	0.807424	0.736058	0.735421	0.807971	0.761996	0.766702	0.804211	0.795125	0.738095	0.771831	0.82359	0.744848	0.776111	0.713081	0.704044	0.612513	0.457784	0.647201	0.565552	0.566354	0.637959	0.636029	0.632118	0.694675	0.677473	0.617238	0.606286	0.525753	0.569443
0.863357	0.795839	0.84031	0.802098	0.812866	0.916494	0.915581	0.721819	0.696123	0.608267	0.647955	0.555977	0.59638	0.528097	0.54348	0.60271	0.755455	0.820757		0.797759	0.848458	0.933574	0.936643	0.981981	0.862579	1.0448	0.929216	1.01323	0.996467	0.922025	0.925723	1.00597	0.954883	0.870419	0.786267	0.723312	0.649974	0.623581	0.637533	0.64078	0.558725	0.619419	0.613495	0.622574	0.549639	0.62104	0.611998	0.620047	0.605794	0.608637
0.816102	0.829768	0.871848	0.837105	0.850998	0.82206	0.877734	0.956016	0.89657	0.828174	0.787859	0.746108	0.750343	0.810034	0.803802	0.744414	0.748932	0.773167		0.600905	0.681939	0.612083	0.578113	0.567323	0.531661	0.531364	0.621833	0.640306	0.686792	0.725483	0.72635	0.705342	0.737419	0.738352	0.787385	0.858566	0.958375	0.964629	0.933884	0.893487	0.875218	0.841126	0.808443	0.739728	0.703187	0.776435	0.816947	0.831444	0.848144	0.839982
0.465268	0.52596	0.516112	0.507235	0.521971	0.595805	0.601175	0.634091	0.643115	0.702625	0.727145	0.721155	0.728502	0.713215	0.807819	0.684995	0.690326	0.746997		0.649817	0.713043	0.708624	0.682346	0.719538	0.658336	0.677451	0.700437	0.743212	0.662516	0.638541	0.625848	0.581949	0.557261	0.56425	0.557589	0.509484	0.54833	0.545923	0.539818	0.503579	0.510127	0.519598	0.49801	0.484435	0.504575	0.48154	0.452725	0.496547	0.449787	0.476149
0.741625	0.688192	0.610422	0.788883	0.712581	0.606913	0.521519	0.511526	0.501627	0.496598	0.46931	0.479818	0.521702	0.537346	0.605361	0.665355	0.684827	0.657424		0.703812	0.674129	0.691608	0.737379	0.775836	0.721991	0.738913	0.732916	0.694542	0.745039	0.810276	0.777549	0.877899	0.862927	0.939673	1.16914	1.17145	1.0958	1.06762	1.03968	1.02754	0.935998	0.848897	0.688823	0.598916	0.521138	0.5294	0.530505	0.438852	0.505719	0.523473
0.524846	0.548981	0.564492	0.492824	0.53919	0.565525	0.600982	0.616394	0.538444	0.533172	0.481851	0.423744	0.459505	0.449142	0.458044	0.54801	0.851455	0.784078		0.963734	0.99603	1.13754	1.11352	1.08886	1.02394	0.936388	0.867344	0.704992	0.707925	0.555357	0.56789	0.513226	0.505859	0.458454	0.460358	0.518276	0.514717	0.517263	0.639411	0.603551	0.630961	0.694592	0.676573	0.636387	0.561963	0.517011	0.502537	0.499946	0.467421	0.467859
0.265178	0.327038	0.351646	0.343798	0.320996	0.340406	0.356174	0.750456	0.586042	0.453363	0.785345	0.791888	0.680682	0.771862	0.971323	1.01572		1.03396	0.944135	1.06783	0.578644	0.848513	1.38237	1.38495	1.8006	1.56305	1.59062	0.949954	1.78054	1.46894	1.76542	1.95553	1.84169	1.30498	0.983486	0.981077	0.759848	0.81462	0.893929	0.944224	0.912114	1.04287	0.951021	0.837378	0.961438	0.910313	0.805862	0.830547	0.80968	0.801831
0.8643	1.06016	1.12427	1.0533	1.22408	1.2407	1.31405	1.14758	1.1069	1.07124	0.994283	1.04554	1.06494	0.985601	0.955764		0.840954	1.0236	0.943393	1.01287	0.847293	0.885941	0.85133	0.825043	0.930441	1.02649	1.11366	1.15951	1.21165	1.28954	1.13348	1.15913	1.20965	1.04507	1.04829	1.01759	0.944186	0.848357	0.772974	0.797171	0.762432	0.660038	0.683499	0.698508	0.728506	0.727343	0.832002	0.768373	0.81461	0.935141
0.477953	0.633678	0.708998	0.86513	0.939615	1.0099	1.05272	1.10704	1.19659	1.2063	1.24394	1.24553	1.23561	1.13149		1.23949	1.16528	1.02624	0.968382	0.992447	0.985664	0.989648	0.886465	0.81656	0.877933	0.842075	0.815871	0.849586	0.919695	0.938159	1.01475	0.992494	1.07444	1.06435	1.10221	1.06862	1.02911	0.960142	0.884272	0.864922	0.86627	0.900211	0.814649	0.775535	0.705231	0.682079	0.614933	0.597202	0.581097	0.575739
0.202106	0.268605	0.263139	0.263108	0.261641	0.259408	0.278302	0.238298	0.24026	0.214374	0.225359	0.182274	0.193933	0.195584		0.225779	0.22938	0.221106	0.279827	0.280621	0.233142	0.302917	0.354566	0.382053	0.355445	0.399509	0.416697	0.487617	0.541151	0.547633	0.591565	0.646824	0.649991	0.674013	0.70633	0.743712	0.742485	0.74731	0.733985	0.709572	0.645072	0.667698	0.668596	0.680824	0.746806	0.708171	0.764209	0.69241	0.681708	0.617676
1.07311	0.815568	0.631415	0.913419	1.04018	1.20102	1.60872	1.8756	1.38381	1.54543		1.39661	1.15791	0.715092	1.19927	1.11956	1.10412	1.20431	1.46139	1.63286	2.28238	3.30057	1.67798	1.52305	1.59247	1.47293	1.24773	1.27321	1.43916	1.6348	1.65315	1.56743	2.81623	2.51656	2.50845	2.86258	2.84671	2.85338	2.78735	3.29766	3.39719	3.27994	3.90829	3.42042	2.8328	2.51738	2.5927	2.31831	2.6325	2.77409
1.07297	1.0401	0.810403	1.14232	0.913791		1.36044	1.36272	1.59016	1.46001	1.40419	1.15623	1.20882	1.18415	0.992963	1.01682	1.03872	1.00225	0.850044	1.19307	1.20544	1.08741	0.94568	0.767023	0.656149	0.822685	0.813678	0.912304	0.946311	0.928851	0.872355	1.12983	1.03132	1.11036	1.0725	1.03249	1.04902	1.11952	1.13911	1.18527	1.12805	1.13237	1.11058	1.11192	1.14242	1.13952	1.18544	1.0913	1.0618	1.01079
0.974292	1.11538	0.969293	0.886503	0.891254	0.814133	0.740869	0.730401	0.725041	0.739855	0.709836	0.836034	0.795902	1.01538	1.05742	1.05945	1.07527	0.966407	0.924673	1.02096	0.973962	0.962962	1.0846	1.07558	1.12184	1.11107	1.05308	1.05879	1.04794	1.13072	1.05408	1.0028	0.982568	0.956853	0.958858	0.934263	0.888735	0.858439	0.799356	0.915448	0.99106	1.01094	1.18637	1.1038	1.13241	1.25332	1.15373	1.14591	1.20482	1.16
1.55586	2.21016	2.02391	2.59713	2.48613	2.87034	2.87809	3.1029	2.42845	4.18299	3.73078	3.04789	3.55232	3.36203	4.26404	4.09326	2.04695	1.99572	1.89369	1.73994	1.53311	1.65108	1.58493	1.56675	1.80153	1.51423	1.98918	1.9082	1.88615	1.80524	2.24382	1.60918	1.93318	2.01017	2.30029	2.35938	2.23031	2.14847	2.11865	2.50237	2.26237	2.09279	2.31766	2.15779	1.90285	1.77787	1.77024	1.65066	1.48515	1.61056
0.723555	0.688113	0.667804	0.64885	0.63547	0.665559	0.702861	0.715451	0.743901	0.733278	0.774981	0.870123	0.951108	0.945578	0.968382	1.02889	1.05801	1.09784	1.14788	1.17752	1.12425	1.1964	1.18823	1.18408	1.24689	1.20161	1.14014	1.06574	1.123	1.11084	1.04435	1.00598	1.01829	0.964635	0.969102	0.96342	1.08257	1.07537	0.984249	0.968937	0.916889	0.885836	0.822057	0.785995	0.716581	0.726015	0.740724	0.726393	0.743653	0.73878
1.25043	1.26799	1.49101	1.43005	1.63215	1.5887	1.85991	1.92791	1.82417	1.87153	1.84585	1.79806	1.57509	1.74268	1.90885	1.93826	1.89701	1.80853	1.88844	1.88222	1.84968	1.75054	1.86199	1.83648	1.83216	1.81478	1.74481	1.78079	1.76161	1.59236	1.69692	1.65695	1.60214	1.51775	1.58087		1.47367	1.48855	1.55299	1.61477	1.55278	1.74429	1.7984	1.98478	1.86223	1.83763	1.95152	2.04501	1.86592	1.8292
0.547671	0.464182	0.514589	0.369166	0.392173	0.450458	0.423149	0.393707	0.457192	0.347152	0.419721	0.391437	0.408573	0.404072	0.463698	0.52653	0.493151	0.57279	0.508086	0.541805	0.648804	0.64893	0.796724	0.870635	0.980435	0.915672	0.861474	1.01444	1.06432	1.12185	1.13808	1.15728	1.15541	1.12037	0.963359	0.827076	1.04243	0.956957	0.958977	0.491297	0.9578	0.650049	0.587955	0.575856	0.573421	0.571926	0.619489	0.626504	0.639345	0.634744
1.12695	1.18146	1.27178	1.20276	1.3332	1.34052	1.4295	1.4853	1.6645	1.76214	1.77493	1.76634	1.89316	1.7044	1.78447	1.5691	1.71829	1.48561	1.68961	1.56287	1.37974		1.45675	1.25976	1.28048	1.28667	1.31027	1.36428	1.29312	1.33137		1.16681	1.15	1.09733	1.19483	1.20352	1.21406	1.26137	1.24028	1.13488	1.09849	0.986078	0.947402	0.935859	0.960903	0.907959	0.872275	0.867742	0.795688	0.774476
0.808868	0.812477	0.857772	0.887392	0.845289	0.906621	0.990118	1.02536	1.16529	1.27971	1.42411	1.51815	1.77869	1.54184	1.55519	1.56353	1.36751			1.48766	1.47483	1.28828	1.2503	1.19834	1.12043	1.13717	1.11414	1.13174	1.15836	1.09666	1.01268	1.05164	1.09664	1.14	1.15592	1.18909	1.14927	1.11469	1.11794	1.0799	1.07142	1.0607	0.982041	0.903667	0.902352	0.939327	0.941928	1.01363	1.03145	1.06441
0.551123	0.424214	0.497213	0.709017	0.761692	0.912628	0.878826	0.865359	0.991707	1.02704	1.0623	1.26657	1.13444	1.14773	1.20706	1.2378	1.14829			1.04039	1.09709	0.922258	0.947284	1.00606	1.06507	1.02208	1.04685	1.01615	1.07726	1.13575	1.18441	1.25127	1.34963	1.36247	1.41544	1.41117	1.38916	1.42318	1.455	1.46563	1.44284	1.44219	1.37291	1.32703	1.23814	1.18791	1.17098	1.16759	1.16481	1.09679
0.511011	0.596318	0.538558	0.6508	0.624117	0.620664	0.520893	0.51136	0.483069	0.465867	0.464411	0.419276	0.401443	0.403627	0.360689	0.379654	0.369195			0.425806	0.391135	0.433988	0.419755	0.435533	0.451376	0.454213	0.461431	0.50646	0.521242	0.5495	0.563126	0.565066	0.584862	0.537738	0.565071	0.545204	0.540785	0.57521	0.619266	0.61861	0.66392	0.687104	0.72296	0.737881	0.794529	0.796816	0.776789	0.758154	0.736303	0.728881
0.369562	0.370686	0.402149	0.410495	0.428738	0.420066	0.462045	0.456591	0.55459	0.633899	0.695957	0.713212	0.676465	0.740291	0.738994	0.714771	0.71889			0.683832	0.695118	0.653066	0.682885	0.749441	0.688212	0.677214	0.707261	0.707156	0.678515	0.71638	0.711057	0.701112	0.700461	0.700023	0.738042	0.727324	0.738681	0.715752	0.752395	0.71347	0.685569	0.696612	0.721821	0.728799	0.72112	0.761995	0.780299	0.742543	0.690821	0.664513
0.59974	0.705187	0.849651	0.902974	0.967316	0.912696	0.994668	0.9971	0.97433	1.05372	1.07003	1.12751	1.06538	1.09687		1.21203	1.22749	1.18152		1.12303	1.12672	1.10012	0.969807	0.945264	0.868592	0.840016	0.826908	0.840449	0.803995	0.819966	0.870459	0.866347	0.875959	0.874982	0.832447	0.903976	0.791227	0.865303	0.784899	0.797768	0.788473	0.6666	0.55963	0.521763	0.871227	0.894511	0.996996	0.840782	0.683528	0.445587
0.753034	0.714683	0.695622	0.696502	0.732754	0.698034	0.765485	0.777387	0.922674	0.901538	0.916232	0.991923	1.08371			1.59284	1.19745	1.12258	1.20262	1.18488	1.17639	1.0977	1.27296	1.30249	1.3564	1.32302	1.34467	1.29561	1.3646	1.39761	1.41054	1.53874	1.5312	1.67107	1.74413	1.82777	1.88029	1.75861	1.6734	1.53145	1.46232	1.34469	1.33407	1.2003	1.15349	1.14593	1.1069	1.09483	1.0795	1.07006
1.33108	1.20868	1.51969	1.49525	1.56461	2.01629	1.54548	1.43031	1.45099	1.35235	1.14187		1.66253	1.5284	1.69266	1.48611	1.65733	1.82832	1.86813		1.8309	1.76472	1.73431	1.60653	1.71669	1.85336	1.80801	1.78513	1.89365	1.8482	2.13709	1.67286	1.7854	2.07089	2.07883	2.25323	2.00674	2.10428	2.01857	1.89879	2.13558	1.95564	2.26153	2.39182	2.59233	2.24749	2.24449	2.32936	2.7681	3.09892
0.570068	0.659027	0.889859	1.32604	0.364919	0.451468	0.342644	-0.0123973	0.0599935			0.839655	0.916953	0.888005	0.746923	0.775007	0.647484	0.664901	0.689855	0.849224	0.795267	0.879647	0.941676	0.966835	0.890782	0.968486	0.931619	0.992569	0.906284	0.82643	0.755633	0.751448	0.78831	0.852067	0.753311	0.73666	0.689264	0.693364	0.692664	0.705374	0.720053	0.715986	0.750636	0.740618	0.670599	0.669775	0.648501	0.667722	0.619865	0.625989
0.973499	0.899512	0.81488	0.832641	0.828663	0.876327	0.844067			1.51163	1.23403	1.51854	1.04081	1.13888	1.22652	1.25703	1.16648	1.65727	1.46522	1.32571	1.33791	1.52815	1.24543	1.17709	1.08217	1.11836	1.19286	1.19555	1.1419	1.13833	1.06809	1.07781	1.05099	1.0638	1.34707	1.44906	1.41694	1.3772	1.42635	1.54927	1.562	1.65159	1.72042	1.74351	1.87208	1.8201	1.83684	1.86897	1.76767	1.64102
0.889073	0.932648	0.933094	0.954241	0.938904			0.910047	1.00578	1.10434	1.14347	1.06219	1.27153	1.11868	1.18276	1.13628	1.18136	1.17066	1.06187	1.05797	0.992304	1.03061	0.970775	0.896502	0.869445	0.807927	0.755518	0.728534	0.717124	0.73062	0.682187	0.675412	0.694067	0.687369	0.651962	0.660422	0.661008	0.608744	0.628474	0.632947	0.648118	0.668864	0.692263	0.727376	0.708796	0.733439	0.752559	0.83931	0.858332	0.933081
2.2871	2.12966	2.21942	2.37843	1.50488	2.26357	1.85188	2.3055	1.08234	1.41809	1.55313	1.61259	1.34911	1.42431	1.58018	1.57513	1.65369	1.77511	2.02838	2.22923	2.21627	2.26317	2.11306	2.49192	2.21105	2.42438	2.18735	2.45458	2.68046	2.27629	2.5326	2.59261	2.81893	2.60549	2.33928	2.54089	2.36326	2.33436	2.43023	2.28607	2.52035	2.50084	2.21414	2.54748	2.47795	2.4187	2.71118	2.48984	2.43213	2.48288
0.281223	0.414163	0.470819	0.562259	0.609371	0.69035	0.733926	0.796352	0.865736	0.945311	1.03966	1.03357	1.07413	1.07608	1.13359	1.07696	1.0655	1.03172	1.02176	1.01027	0.979014	1.02148	0.964832	0.998439	1.04965	1.0388	1.0543	1.10377	1.10893	1.07905	1.096	1.14638	1.11011	1.13104	1.02958	1.04298	1.06394	1.03885	1.04183	1.1259	1.16152	1.1584	1.1393	1.09211	1.15497	1.19231	1.23172	1.2656	1.31205	1.30098
0.417805	0.435357	0.466006	0.474216	0.479512	0.531502	0.504148	0.494762	0.533035	0.540745	0.539399	0.52645	0.535323	0.520297	0.528951	0.489816	0.511337	0.486187	0.527417	0.489931	0.513805	0.518057	0.547156	0.549585	0.536086	0.547502	0.523596	0.540359	0.553708	0.564339	0.648248	0.717854	0.730487	0.688126	0.742724	0.710294	0.645888	0.653852	0.599204	0.558211	0.598775	0.599366	0.543385	0.576116	0.537832			0.634607	0.463111	0.46236
0.493364	0.521081	0.502269	0.4852	0.475905	0.448079	0.399247	0.381107	0.360014	0.344412	0.3408	0.322711	0.320797	0.319788	0.313439	0.285978	0.343312	0.385182		0.411146	0.323342	0.429011	0.425829	0.450471	0.408625	0.38582	0.411024	0.414267	0.451041	0.474223	0.407897	0.439913	0.458363	0.468423	0.472344	0.481764	0.504488	0.519788	0.457076	0.376025	0.32425	0.438845	0.31295	0.333616	0.362321	0.375216	0.402125	0.459925	0.485134	0.510359
0.696133	0.685875	0.791338	0.886244	0.863382	0.886431	0.986064	0.997647	1.06606	1.0579	1.08541	1.14177	1.1381	1.1354	1.17723	0.998279	1.02661				0.762802	0.750008	0.632104	0.564342	0.556897	0.526384	0.509225	0.546535	0.54928	0.557951	0.614824	0.664129	0.685085	0.685865	0.699909	0.812131	0.759555	0.688315	0.780976	0.917509	0.953918	0.8676	0.839187	0.750158	0.790221	0.792368	0.767525	0.92318	1.05542	1.19941
0.637218	0.672434	0.708021	0.678858	0.63458	0.629053	0.611625	0.585328	0.562158	0.552165	0.522372	0.630265	0.647145	0.736397	0.744376	0.752221	0.862717		0.851427		0.881778	0.910112	0.931385	0.946195	0.940126	0.964758	0.941241	0.933699	1.0181	1.03542	1.01141	1.00878	1.15356	1.10234	1.14611	1.13693	1.11786	1.00486	0.998442	0.983534	0.966197	0.905778	1.00409	0.896512	0.843702	0.838233	0.77614	0.799896	0.901682	0.814402
0.463235	0.461986	0.46071	0.461143	0.466414	0.52484	0.583357	0.611252	0.645334	0.719747	0.724059	0.81718	0.946772	1.01094	1.04219		1.16482		1.1433	1.32473	1.2119	1.24211	1.21624	1.16581	1.11185	1.0255	1.06199	0.951559	0.845034	0.80771	0.799784	0.771092	0.733356	0.768502	0.822997	0.84031	0.864818	0.838006	0.876516	0.903103	0.918101	0.878668	0.759103	0.732658	0.671516	0.614509	0.573888	0.470043	0.330705	0.320028
0.399077	0.386548	0.433017	0.455832	0.483544	0.458849	0.445904	0.395781	0.413921	0.36194	0.306697	0.318597	0.31872	0.360119			0.336379	0.360014	0.37438		0.295159	0.328157	0.25198	0.265403	0.24121	0.271975	0.24549	0.264311	0.277221	0.317727	0.267518	0.294585	0.2993	0.300681	0.318853	0.294576	0.275373	0.256129	0.222425	0.256298	0.299843	0.341018	0.31008	0.261966	0.248596	0.275687	0.249719	0.230016	0.151441	0.152419
0.734544	0.469091	0.347776	0.322393	0.299646	0.295246	0.294721	0.301142	0.350889	0.329024	0.332807	0.302464	0.811357		2.55816	3.29367	6.17802	5.82954			0.689298	0.603003	0.625414	0.618068	0.627617	0.534269	0.538801	0.574805	0.497265	0.49632	0.459868	0.462639	0.460217	0.467578	0.461281	0.460794	0.392091	0.48068	0.421006	0.448709	0.437902	0.41386	0.45807	0.447809	0.46762	0.439697	0.470826	0.45495	0.451568	0.408609
0.606483	0.585367	0.805314	1.37604	1.19164	0.920961	0.667845	0.591965	0.255458		0.523743		0.424543	0.401254	0.329877	0.349114	0.351456	0.405066	0.37695	0.431474	0.434053	0.497077	0.535463	0.567649	0.577903	0.650242	0.675853	0.683323	0.731592	0.903302	0.920849	0.888639	0.828135	0.784869	0.703149	0.636262	0.643104	0.622718	0.619817	0.600126	0.619336	0.626857	0.615515	0.602373	0.54708	0.553327	0.546549	0.526228	0.53921	0.594664
1.14084	0.391061	0.399123	0.295231	0.509529	0.574675				0.633896	0.639471	0.624343	0.640793	0.647105	0.698155	0.752576	0.707311	0.679449	0.641979	0.652409	0.646715	0.709213	0.709251	0.742204	0.725761	0.746333	0.807798	0.844195	0.889942	0.90715	0.974426	1.03566	1.04896	1.15254	1.27949	1.24824	1.24661	1.20063	1.17797	1.07851	1.07334	1.02427	0.961648	0.938894	0.867729	0.858101	0.854563	0.903508	0.988192	1.03309
0.65708	0.578361	0.522952	0.695589	0.854637	0.570133	0.465891	0.510272	0.527359	0.72387	0.843246	0.782326	0.978528	0.843618	0.788411	0.710367	0.634821	0.557128	0.587745	0.604138	0.690355	0.720253	0.782578	0.742813	0.679521	0.601784	0.556578	0.516263	0.507536	0.459966	0.457167	0.426573	0.397211	0.386725	0.423686	0.472647	0.472728	0.464367	0.487646	0.594825	0.580696	0.561881	0.55707	0.498654	0.509829	0.623062	0.58892	0.595854	0.512247	0.586134
1.54773	1.52439	2.01412	2.30141	1.98646	1.92007	2.06181	1.92402	2.03523	2.25121	2.12676	2.30569	2.61365	2.329	2.18784	1.99392	1.58171	1.66789	2.25076	1.72846	1.47868		1.91528	2.16649	2.29236	2.52161	2.90038	2.20618	3.20559	3.40316	3.03724	3.11737	2.58865	3.19067	3.41251	2.44947	2.61207	2.26545	2.76282	1.89814	2.21677	1.87272	1.99572	2.03051	2.15834	1.82924	2.77281	2.03627	2.83799	2.22227
0.350201	0.379755	0.325245	0.383287	0.368783	0.411002	0.387679	0.436105	0.442524	0.530102	0.487588	0.484376	0.511647	0.474927	0.525149	0.525514	0.537174		0.585677		0.634178	0.575937	0.528855	0.520532	0.450898	0.457943		0.390113	0.474912	0.493098	0.582905	0.686524	0.628206	0.641738	0.633327	0.639206	0.663406	0.621322	0.677072	0.697181	0.783997	0.793814	0.708968	0.707997	0.712657	0.676255	0.661216	0.674922	0.650617	0.669862
0.504531	0.482655	0.532889	0.53927	0.580961	0.498746	0.516774	0.545329	0.640352	0.701116	0.704716	0.729327	0.780753	0.819002	0.850269	0.874303	0.868359		0.884029			0.859262	0.986697	0.993024	1.07384	1.17241	1.2969	1.27708	1.22479	1.3475	1.4471	1.37871	1.47809	1.41306	1.29701	1.17461	1.02306	0.899094	0.752142	0.629218	0.642108	0.588519	0.579138	0.539107	0.488488	0.47907	0.452666	0.456392	0.461391	0.526301
0.320479	0.355071	0.388892	0.355112	0.407219	0.39085	0.433804	0.472154	0.535183	0.550491	0.638363	0.694954	0.70956	0.734872	0.757917	0.818214			0.616262		0.606696	0.638105			0.590271	0.59708	0.585217		0.628862		0.712744	0.722944	0.741404	0.743345	0.727036	0.69279	0.721265	0.730591	0.753584	0.735895	0.715366	0.709614	0.630939	0.67507	0.626919	0.619722	0.581917	0.602388	0.630935	0.648921
0.804644	0.691666	0.697932	0.686489	0.620451	0.686489	0.572893	0.586699	0.627668	0.418056	0.492794	0.394492	0.341342	0.357496	0.440272	0.326264		0.434488			0.45404	0.471848	0.346428	0.311337	0.322437	0.444944	0.440808	0.500948	0.54618	0.532014	0.714952	1.0787	1.21387	1.09374	1.03296	0.957831	0.848234	0.902264	0.67405	0.650184	0.666482	0.71019	0.696709	0.676142	0.647732	0.642417	0.673805	0.625461	0.544379	0.481336
0.336437	0.444938	0.506323	0.548291	0.59015	0.646021	0.63103	0.598582	0.570511	0.588978	0.587456	0.575448	0.498518	0.485909		0.683027	0.542031		0.740621	0.88291	0.888989	0.975346	0.853821	1.09695	1.00763	1.06826	0.955516	1.19422	1.13972	1.18908	1.2262	1.14458	1.20819	1.43223	1.46682	1.27667	1.28128	1.33352	1.35525	1.11624	1.0676	1.05328	0.957148	0.937637	1.04726	0.941984	0.968805	0.958618	0.888875	0.874791
0.73235	0.906439	0.962138	0.913758	0.793879	0.662335	0.64555	0.69018	0.69643	0.778029	0.660734	0.722118	0.695737		0.555683	0.516092	0.566017	0.617086	0.640137	0.560303	0.594702				0.582778	0.609524	0.642251	0.617519	0.686537	0.760654	0.67269	0.730321	0.723863	0.781492	0.773834	0.807329	0.819974	0.854781	0.864711	0.932841	1.00131	0.972208	0.929955	0.956586	0.927337	0.97878	0.934145	1.0413	1.05663	0.99901
0.442391	0.411126	0.41072	0.407308	0.447916	0.467186	0.501944	0.57998	0.673226	0.682319	0.762183	0.762694	0.841693		0.907217	0.816827	0.910008	0.801742	0.713816		0.813313	0.765072	0.74384	0.711724	0.691281	0.717524	0.698477	0.680227	0.671676	0.660383	0.661349	0.649915	0.715284	0.681198	0.616284	0.545615	0.501882	0.458417	0.488435	0.446727	0.417975	0.416808	0.408131	0.41016	0.405901	0.396024	0.378311	0.34964	0.38292	0.41028
0.571287	0.607818	0.589642	0.611165	0.600175	0.643046	0.67288	0.762263	1.06957		0.760374	0.903997		0.691042	0.711031	0.912664	1.16158	1.10415	1.04989	0.974227	0.877959	0.84022	0.757511	0.822807	0.795936	0.845171	0.813515	0.787377	0.841219	0.812768	0.772283	0.786792	0.791227	0.729349	0.729711	0.753877	0.723471	0.754939	0.759931	0.769028	0.776464	0.786153	0.745511	0.71468	0.682238	0.672045	0.655495	0.670016	0.643376	0.658859
0.826801	0.802404	0.843288	0.83926	0.777163	0.78511	1.25452	1.34524		1.37601			0.961981	1.32721	1.25207	1.24932	1.29181	1.25099	1.1737	1.16439	1.24019	1.15751	1.13142	1.16317	1.04251	1.15606	1.08331	1.13332	1.22235	1.10294	1.09875	1.11666	1.13672	1.20401	1.23644	1.24471	1.32026	1.32501	1.30263	1.3907	1.46722	1.52824	1.57163	1.65777	1.84776	1.97721	1.99788	2.02675	2.01778	2.04535
0.151531	0.178142	0.336097	0.799334	1.58369	0.62776					0.686024	0.68306	0.609285	0.616946	0.555341	0.498083	0.4839	0.571288	0.654824	0.583125	0.700454	0.757387	0.765008	0.854599	0.855545	0.907602	0.843262	0.691067	0.578475	0.535477	0.461596	0.351508	0.402943	0.330006	0.363903	0.408152	0.409723	0.362329	0.345498	0.389587	0.383721	0.41346	0.486777	0.537257	0.53829	0.642162	0.665686	0.660178	0.760683	0.8489
0.665611	0.74063	0.794249				0.803377	0.754285	0.71255		0.690983	0.727472	0.682108	0.714394	0.749457	0.767343	0.778599	0.921531	0.909958	0.913148	0.862226	0.925488	0.918387	0.948993	0.915126	1.04692	1.15812	1.14603	1.19344	1.19077	1.24364	1.25487	1.24889	1.38208	1.44638	1.45384	1.50913	1.49676	1.34285	1.14987	0.960683	0.893629	0.877228	0.847672	0.793448	0.790259	0.717624	0.682493	0.665281	0.63227
0.999788	1.10415	1.00498	1.01213	1.07008	1.06154	1.07905	1.08397	1.11075	0.959171	1.02729	1.05745	1.07188	1.0946	1.10857	1.04186	1.08734	1.1172	1.06176	1.0048	1.04189	1.03851	1.05474	1.03501	0.989515	1.01191	0.982395	0.905395	0.893336	0.84964	0.83768	0.854552	0.832456	0.767812	0.752654	0.694585	0.653842	0.659526	0.661532	0.701301	0.664818	0.658523	0.651106	0.626965	0.619914	0.600366	0.607742	0.558251	0.5768	0.589097
1.01874	1.04775	1.08981	1.0541	1.06349	1.00507	1.04937	1.08518	1.18447	1.21652	1.26267	1.21075	1.247	1.20768	1.24593	1.26124	1.32668	1.31754	1.34548	1.32119	1.34809	1.32607	1.29838	1.42334	1.35005	1.41936	1.43292	1.51612	1.49563	1.54599	1.54517	1.50401	1.47976	1.41962	1.40941	1.35768	1.26992	1.17512	1.13119	1.06549	0.979597	0.912253	0.897225	0.859761	0.839612	0.86514	0.894906	0.947247	0.998541	0.985789
1.23592	1.01649	1.11405	1.03064	0.881316	0.856183	0.821556	0.716691	1.03876			0.756443	0.63609	0.672072	0.72337	0.790694	0.813117	0.880362	0.907974	0.770252	0.844112	0.816461	0.836515	1.00837	1.00253	0.967838	0.926033	0.932043	0.949942	0.921049	0.866849	0.923484	0.912063	0.844882	0.811177	0.804643	0.881251	0.629111	0.682703	0.85713	0.847705	0.848884	0.775027	0.80734	0.801604	0.831741	0.807093	0.821818	0.835828	0.817762
0.808188	0.817938	0.828282	0.911204	0.86812	0.902039	0.989376	1.07521	1.02472	1.167	1.1736	1.19091	1.13764	1.12094	1.08766	1.03886	1.01125	0.971499	0.942049	0.906968	0.922061	0.909716	0.826555	0.817051			0.690365	0.655211	0.696589	0.685073	0.654867	0.724393	0.70652	0.792836	0.855541		0.978136		0.842115	0.827872	0.874939	0.900474	0.894918	0.852944	0.919234	0.822136	0.803763	0.745084	0.756034	0.79649
0.83061	0.870362	0.863751	0.883153	0.930804	0.913324	0.995373	0.953415	0.968834	0.941055	0.891912	0.925952	0.907114	0.918765	0.929782	0.972717	1.0385		0.959647		0.951913	0.821777	0.791194	0.840101	0.888891	0.895623	0.922294	0.899782	0.967272	1.00149	1.05699	1.0691	1.10449	1.22132	1.24555	1.27444	1.33087	1.33017	1.45595	1.40977	1.31564	1.3263	1.29643	1.20299	1.09528	0.94786	0.813595	0.769083	0.708877	0.710246
0.202379	0.189623	0.182403	0.182667	0.207814	0.265353	0.24774	0.295399	0.366823	0.449097	0.40127	0.451737	0.486556	0.497193	0.549282	0.623474	0.634297		0.719329	0.986532	1.05991	1.10464	1.16941	1.22235	1.28962	1.23499			1.01739	0.90032	1.0901	0.904872	0.958114	0.909773	0.856681	0.770615	0.762237	0.766447	0.777193	0.742257	0.780467	0.747896		0.736258	0.736826	0.683959	0.652018		0.680566	0.808443
0.740584	0.811121	0.803859	0.785434	0.747735	0.746823	0.737036	0.678891	0.60018	0.521149	0.496323	0.512756	0.517657	0.478669	0.533312	0.595319	0.582273			0.60559	0.599337	0.642208	0.565307	0.526287	0.512217	0.531354	0.585023	0.541181	0.465829	0.487097	0.502416	0.515854	0.586773	0.575625	0.593629	0.526279	0.567877	0.562047	0.586175	0.618422	0.582142	0.738072	0.652871	0.651311	0.678934	0.711367	0.669234	0.667932	0.675466	0.611429
0.583193	0.626358	0.537699	0.443432	0.455854	0.403654	0.476934	0.505252	0.433422	0.485542	0.501478	0.602088	0.531599	0.577012	0.576484				0.579979		0.631637	0.548891	0.518254	0.536703	0.536973	0.600797	0.567176	0.597249	0.671764	0.613267	0.649004	0.667446	0.63406	0.589094	0.558241	0.607907	0.528048	0.56033	0.552497	0.573885	0.589171	0.603534	0.622645	0.572668	0.60117	0.588605	0.551269	0.62009	0.691807	0.680771
0.270187	0.268152	0.26611	0.299289	0.342841	0.325492	0.419615	0.442207	0.541303	0.542046	0.554402	0.658112	0.648133				0.696709		0.672167	0.732041	0.774179	0.75984	0.815589	0.800099	0.849672	0.857833	0.857054	0.905091	1.00564	1.03377	1.09533	1.10797	1.1432	1.13628	1.18071	1.27085	1.27275	1.51041	1.37227	0.733004	0.738617	0.751033	0.692687	0.412636	0.594029	0.843515	1.04874	1.31489	1.52187	1.64932
0.270936	0.303961	0.290146	0.370832	0.401681	0.499324	0.709542	0.632033	0.651904	0.700531	0.635793	0.528023	0.540881		0.55652		0.950619	0.823176	0.846462			0.573893	0.662127	0.568421	0.614416	0.56299	0.596547	0.554424	0.542553	0.562437	0.631729	0.751421	0.973671	1.11786	1.20863	1.17098	1.20918	0.981883	0.90329	0.635329	0.540226	0.490354	0.445643	0.428669	0.436925	0.476008	0.440852	0.421537	0.443035	0.444916
0.615563	0.669331	0.563614	0.551734	0.657255	0.651617	0.675923	0.696675	0.815726	0.835371	0.8852	0.776897		0.974394			1.06599	1.04538	1.06979	1.34133		1.32612	1.23237	1.36123	1.23	1.18009	1.10201	0.964835	0.868617	0.791529	0.756137	0.806102	0.743159	0.71559	0.723667	0.725723	0.74305	0.770715	0.843187	0.872867	0.90868	0.969583	0.897109	0.881637	0.86301	0.889739	0.87325	0.870186	0.92764	1.0025
0.587082	0.596324	0.702641	0.762603	0.802945	0.830476	0.773578	0.820624	0.791446	0.871967	0.875728	0.991584	1.15042	1.57279	1.1568	0.435905	0.268772	0.26148	0.251367	0.492929	0.531314	0.44313	0.621574	0.685358	0.612927	0.585446	0.543479	0.606489	0.691311	0.698829	0.764208	0.858049	0.881053	0.971735	1.03142	1.0817	1.10895	1.11356	1.14225	1.28987	1.25338	1.28712	1.18745	1.14475	1.04274	1.12735	1.10557	1.06183	1.07185	1.08482
0.195325	0.22274	0.29666	0.360525	0.405977	0.386726	0.348987	0.348548	0.37418	0.391557	0.408672	0.378548	0.333701	0.369337	0.374799	0.412406	0.473781	0.537818	0.55752	0.609122	0.548197	0.566562	0.510993	0.565144	0.621949	0.648887	0.604145	0.589906	0.512465	0.456616	0.375404	0.348601	0.344061	0.350148	0.345383	0.319363	0.310263	0.336661	0.351564	0.371481	0.369642	0.428542	0.427607	0.433076	0.457175	0.481579	0.525981	0.629073	0.753616	0.632434
1.06137	1.26671	1.15552	0.921986	0.908033	0.865828	0.872667	0.939501	0.948695	1.11052	1.07333	1.00041	1.01677	0.850879	0.932895	0.947491	0.939954	0.993292	1.05171	1.02284	1.01887	1.02296	1.06579	1.01582	1.04882	1.09379	1.09647	1.11714	1.197	1.23404	1.33901	1.27044		1.46891	1.47424	1.52275	1.60954	1.57045	1.67152	1.53571	1.67622	1.59029	1.46962	1.28624	1.24267	1.10983	1.1167	1.07816	1.06917	1.07092
0.848276	0.833467	0.916671	0.985362	1.02368	1.01385	1.00032	0.996785	0.976767	1.0353	1.077	1.09005	1.11104	1.07721	1.1269	1.06475	1.12232	1.07114	1.0518	0.989725	1.05613	1.0265	1.06766	1.03553	1.06991	1.1212	1.15762	1.11991	1.09653	1.00968	1.049	0.982546	0.986571	0.99099	1.07546	1.20831	1.20963	1.23121	1.20156	1.1063	1.00269	0.98889	1.04549	0.939394	0.958559	0.790583	0.82555	0.795846	0.781328	0.805899
0.953995	0.973696	0.954002	0.973313	0.944982	1.15635	1.12685	1.08722	1.03009	1.09157	0.854989	0.905198	0.744034	0.711094	0.712132	0.721408	0.905145	0.845616	0.856399	0.935084	0.902604	0.932705	0.957834	1.0822	1.0779	1.20672	1.32552	1.47871	1.55004	1.57756	1.56645	1.52789	1.43415	1.47993	1.4335	1.52698	1.40885	1.36793	1.33458	1.12883	1.23655	1.12755	1.09682	0.974431	1.02664	1.06854	1.0693	1.00844	0.966327	0.977907
1.08428	1.0414	0.976836	0.924081	0.899055	0.854867	0.862377	0.877123	0.902913	0.904335	0.923837	0.931931	0.992625	1.10623	1.10346	1.16952	1.17594	1.1911	1.15563	1.18606	1.07645	1.00464	0.977821	0.853616	0.823936	0.773261	0.736531	0.727367	0.714219	0.733513	0.691205	0.675535	0.775915	0.904403	1.0748	1.22817	1.29857	1.1193	0.932085	0.770655	0.704042	0.669337	0.632212	0.658368	0.560354	0.551685	0.672798	0.775606	0.697863	0.799145
0.568172	0.617006	0.673489	0.667189	0.742756	0.840271	0.877968	0.911138	0.974355	1.01304	0.998531	1.08939	1.16617	1.20506	1.21106	1.23106	1.38655	1.36789	1.2348	1.30036	1.33844	1.37067	1.25355	1.3989	1.29167	1.29852	1.22624	1.2811	1.24612	1.23577	1.35941	1.34428	1.35112	1.44896	1.48696	1.43524	1.41919	1.42535	1.40609	1.31799	1.2869	1.31746	1.25579	1.17619	1.12098	1.1269	1.15671	1.17615	1.24144
0.809009	0.826189	0.798249	0.755523	0.874089	0.879863	0.90558	0.945734	0.946883	0.955021	0.934369	1.00741	1.03594	1.19381	1.35737	1.45267	1.42535	1.45405	1.43644	1.37068	1.21332	1.10469	1.05919	0.963385	0.902261	0.838991		0.78639	0.834832	0.923041	0.921082	1.00179	0.926054	1.17223				1.18214		1.14407	1.09495	1.06076	0.967017	0.918693	0.925712	0.902165	0.914108	0.871726	0.855368	0.866106
0.790662	0.745554	0.766602	0.777318	0.837774	0.899262	0.913772	1.03114	1.13011	1.14542	1.06296	1.07898	1.0805	0.967441	0.840905	0.808751	0.819043	0.813639	0.885139	0.862947	0.890622	1.0029	1.02423	1.04671			1.02498	1.00555	1.08424	1.10393	1.09924	1.2954	1.23539	1.33264	1.81883	2.24506	0.836655	0.774877	0.800066	0.756223	0.340589	0.630874	0.908569		1.3621	1.5311	1.32882		0.952862	0.948443
0.638434	0.633362	0.628024	0.689882	0.651555	0.674052	0.615136	0.670855	0.758002	0.855013	0.936354	1.05343	1.11916	1.51276	1.56749	1.43971	1.34305		1.25859			0.998124		0.957663	1.02442	0.957164	0.843629	0.759418	0.780828	0.72059	0.673769	0.718823	0.766277	0.694272	0.699754	0.766948	0.726627	0.777342	0.722697	0.826486	0.780164	0.751951	0.810615	0.806647	0.757193	0.730482	0.722883	0.721138	0.773814	0.78357
1.36297	1.1883	1.38627	1.16327	1.42619	1.47087	1.62896	1.79498	1.79807	1.08908	0.97995	1.1287	1.10614	1.23076	1.834	1.60858		2.27807		2.17842	2.38987	1.85973	1.80074	2.37092	1.81231	1.27101	1.41311	1.33882	1.43852	1.37501	1.47498	1.46206	1.51998	1.66726	1.79726	1.79281	1.71641	1.95298	2.15368	2.07609	2.01078	1.78988	1.95825	1.87311	2.10455	2.11683	1.69733	1.87941	2.05893	2.13661
0.209229	0.195424	0.195891	0.247224	0.235343	0.2582	0.279691	0.26921	0.249658	0.362162	0.472415	0.487499	0.347455	0.296351	0.292438	0.339747				0.393181		0.374504	0.370136	0.35206		0.355714	0.407556	0.346202	0.36105	0.325039	0.301188	0.32345	0.332498	0.38777	0.366294	0.367353	0.382937	0.40426	0.391974	0.416562	0.396578	0.449257	0.445271	0.411063	0.38915	0.46331	0.477434	0.498691	0.469806	0.390443
0.564545	0.555162	0.635299	0.676415	0.819937	0.865055	0.84292	0.79681	0.720931	0.64561	0.685756	0.68177	0.602188				0.620773			0.751779	0.780481	0.777987	0.859312	0.885988	0.839714	0.875261	0.782373	0.817118	0.810388	0.78888	0.804385	0.855481	0.785697	0.773285	0.758924	0.71859	0.699765	0.703579	0.672335	0.731364	0.750074	0.750433	0.794149	0.768773	0.701274	0.683066	0.731851	0.770602	0.719951	0.692477
0.971687	1.01032	0.898051	0.889946	1.39065	1.61041	1.17654	1.50027	2.06361	1.89549	1.8357	1.9453		1.53484	1.44426	1.31643	1.11056	1.20921	1.64019	2.04923	1.57349	1.93294	1.75724	1.95852	1.85042	1.87831	1.92727	1.88334	1.76616	1.6508	1.55047	1.49443	1.38732	1.36898	1.27707	1.21326	1.2317	1.28811	1.41327	1.41009	1.30546	1.26795	1.18683	1.11849		1.07073	1.19988	0.905978	0.928757	0.915099
0.845066	0.82921	0.816323	0.707084	0.700015	0.729289	0.666502	0.655692	0.670773		0.729931	0.858656	0.99802	0.967306	0.8482			0.918574	0.923356		0.912694	0.850308	0.759796	0.721167	0.596831	0.603272	0.657341	0.605047	0.633007			0.664735	0.70665	0.724981	0.750151	0.741527	0.737892	0.737426	0.71002	0.677508	0.699984	0.680683	0.68202	0.659346	0.635593	0.680275	0.709588	0.663168	0.708117	0.80252
0.372872	0.430051	0.468782	0.468047	0.536632	0.573489	0.542067	0.590889	0.620243	0.631857	0.638029	0.61938	0.639775	0.610154	0.675037	0.65552	0.687488	0.728728	0.783573	0.879675	0.826872	0.861231	0.844543	0.878701	0.889616	0.809322	0.81328	0.773511	0.740703	0.770047	0.868479	0.869612	0.917337	0.950197	0.99509	1.05001	1.15483	1.29363	1.31449	1.56049	1.76771	1.61415	1.71918	1.76701	1.66343	1.44667	1.32412	1.07376	0.903705	1.02867
1.10222	1.14988	1.16258	1.21574	1.24373	1.32561	1.36303	1.41405	1.52185	1.51037	1.51063	1.51991	1.53388	1.56054	1.53129	1.457	1.32267	1.37086	1.59802	1.50411	1.5151	1.26809	1.10225		0.873257	0.84051	0.854597	0.843571	0.761141		0.795747	0.75259	0.719243	0.708163	0.742309	0.682571	0.716292	0.680841	0.660387	0.683603	0.712849	0.721876	0.752541	0.733088	0.690838	0.708843	0.683001	0.725081	0.721625	0.75062
0.836453	0.858589	0.858524	0.671771	0.601754	0.681484	0.623315	0.636415	0.641044	0.778107	0.892233	1.05421	1.13335	1.49092	1.56015	1.49545	1.67199	1.78546	1.62304	1.69135	1.5222		1.32383	1.24566	1.08922	1.01136	0.916324	0.90026	0.873621	0.790879	0.770566	0.658195	0.733774	0.671399	0.684218	0.675109	0.667266	0.582291	0.551764	0.429026	0.489279	0.458631	0.515077	0.536218	0.487909	0.472937	0.452827	0.486769	0.41646	0.407925
0.697656	0.795896	0.897177	0.8468	0.933068	0.988647	1.03092	0.968722	0.927424	0.864079	0.925983	0.864121	0.828552	0.813878	0.907973	0.880087		0.824042					0.859414	0.796653	0.767186	0.783651		0.715286	0.719894	0.760875	0.761198	0.727168	0.817501	0.803418	0.773677	0.782385	0.754486	0.711706	0.668244	0.697628	0.675477	0.690845	0.66522	0.685423	0.733505	0.736444	0.73937	0.747542	0.768506	0.781446
0.988466	1.02926	1.00695	1.12301	1.18123	1.16572	1.21041	1.08125	1.00239	1.06207	1.01735	1.10664	1.16244	1.18456	1.23157	1.19753		1.25096				1.46868		1.63145	1.597	1.60195	1.52979	1.48501	1.36536	1.36838	1.46176	1.21627	1.16927	1.15312	1.07988	1.02012	0.948184	0.888182	0.836206	0.855168	0.851735	0.869494	0.881544	0.927342	0.908361	0.935382	0.88529	0.927302	0.933239	0.930829
0.144261	0.1749	0.122589	0.166114	0.201895	0.257133	0.199431	0.291774	0.213481	0.280112	0.399817	0.350927	0.642928		0.586693	0.906753	0.855855							0.726333	0.77767	0.860463	0.793341	0.717612	0.698166	0.612583	0.5896	0.595528	0.508442	0.515937	0.530565	0.548746	0.508223	0.59742	0.567785	0.634964	0.620777	0.606824	0.780076	0.747246	0.69676	0.767924	0.805694	0.799367	0.817839	0.8654
0.581971	0.559758	0.55328	0.585764	0.569346	0.589912	0.640074	0.656046	0.623457	0.687284	0.765487	0.813235	0.83177				1.06471		0.959337		0.795981	0.812372	0.832153	0.847708	0.927809	0.863812	0.847441	0.817609	0.872444	0.897237	0.847579	0.85053	0.843063	0.898925	0.941677	0.957941	0.924513	0.931606	0.979246	0.940574	0.91522	0.933874	0.962388	0.999697	1.05546	1.00549	1.05167	1.03107	1.07711	1.01942
0.372818	0.451767	0.604796	0.713966	0.828949	0.875801	1.05557		1.28434	1.22501	1.33712	1.54826	1.52712		1.28104					0.924991	1.17551	1.33467	1.22217	1.13593	0.9577	0.898076	0.882322	0.878244	0.752188	0.819426	0.775289	0.783685	0.929754	1.06602	1.1085	1.11934	1.17454	1.14211	1.06245	0.960994	1.00456	0.960806	0.900671	0.953516	0.795761	0.833594	0.804693	0.728577	0.804879	0.770933
0.652768	0.63865	0.580819	0.575537	1.06252			0.36119	0.383931	0.406895	0.387707	0.428956	0.465979	0.475532	0.478675	0.465257	0.507813	0.543378	0.56899	0.67569	0.623878	0.653902	0.644919	0.623876	0.580802	0.540919	0.539093	0.581946	0.566553	0.572031	0.607256	0.646707	0.675591	0.707158	0.667248	0.695585	0.639809	0.658183	0.590117	0.545762	0.576299	0.586931	0.540441	0.51076	0.434886	0.381842	0.36585	0.335483	0.305407	0.326625
0.649283	0.663886	0.609973	0.760149	0.568075	0.631793	0.685296	0.719828	0.797358	0.887506	0.865883	0.897242	0.963371	0.975429	1.03096	1.03505		1.16345							1.06719	1.06366	0.940131	0.895327	0.925512	0.849131	0.85752	0.862238	0.889503	0.834868	0.898497	0.896889	0.894749	0.949349	0.977982	1.03517	1.09923	1.09389	1.12105	1.11464	1.13057	1.15659	1.09411	1.07898	1.03685	1.05081
0.631216	0.584415	0.520072	0.515403	0.536513	0.570691	0.618495	0.626343	0.654797	0.694618	0.705719	0.754348	0.888441	0.833977	0.892336						0.558241			0.407873	0.447634	0.333157	0.394595	0.293151	0.345604	0.305715	0.307347	0.378157	0.353381	0.404077	0.382889	0.399626	0.372863	0.404653	0.430489	0.387201	0.512507	0.442672	0.455771	0.465927	0.477562	0.419844	0.444442	0.430432	0.463013	0.528911
0.481977	0.635529	0.726285	0.738576	0.740841	0.748834	0.747073	0.820783	0.823125	0.636778	0.744762	0.607876	0.513612	0.64221	0.691698						0.985981	1.3767		1.35778	1.33789	1.28209	1.32404	1.23495	1.17283	1.41551	1.21164	1.24473	1.09879	1.86534	1.08234	1.16491	1.22696	1.20968	1.28661	1.42985	1.77087	1.44736	1.50273	2.67223	2.87128	2.02199	2.13424	2.27802	1.64949	1.80032
0.266743	0.22736	0.246051	0.291536	0.281599	0.325949	0.363838	0.403025	0.386798	0.441313	0.414198	0.436984	0.496961	0.521004			0.46867	0.476507			0.519064		0.458296	0.448931	0.42667	0.413312	0.432727	0.469622	0.441539	0.435842	0.449532	0.435603	0.454015	0.467918	0.479457	0.499134	0.495378	0.524701	0.529103	0.557712	0.583668	0.578074	0.537745	0.521422	0.511545	0.517619	0.500665	0.494545	0.505928	0.490768
0.220657	0.214502	0.217658	0.249188	0.255209	0.253921	0.267106	0.271226	0.229846	0.268863	0.328307	0.334476	0.335123	0.380969			0.352971						0.45115	0.489117	0.490935	0.545162	0.525466	0.509559	0.501607	0.426968	0.398961	0.384186	0.370166	0.399759	0.404535	0.39355	0.411686	0.506325	0.586583	0.597429	0.608996	0.654481	0.68589	0.708876	0.688185	0.805593	0.784106	0.845338	0.864272	0.871639
0.745046	0.745253	0.558594	0.591203	0.605139	0.637131	0.6669	0.638343	0.633978	0.648646	0.69366	0.721771	0.708854	0.756975			0.857294			0.977319	0.893742		0.972413	1.01266	1.04881	0.989604	1.13123	1.07424	1.03371	0.996582	1.08868	1.05062	1.08884	1.10293	1.12055	1.03402	1.11173	1.1023	1.05625	1.01603	1.02764	1.07903	0.975003	0.92837	0.935036	0.935449	0.972711	0.938635	0.927771	0.923837
0.618957	0.641174	0.654107	0.710806	0.712181	0.732188	0.909188	1.06009	1.19599	1.22172	1.29183	1.25472	1.46463	1.62527		1.64461	1.53943	1.67708		1.33702	1.30047	1.36503	1.38963	1.41734	1.29785	1.23717	1.17975	1.00269	1.1991	1.01513	1.10878	1.08741	1.08739	1.10352	1.03009	1.09906	1.04339	0.971487	1.03883	1.07902	1.06532	1.00499	0.967946	1.14554	1.16815	1.10427	1.11057	0.992115	0.894503	0.910248
0.145599	0.280437	0.309578	0.342784	0.365686	0.352563	0.331297	0.390726	0.320291	0.307481	0.275211	0.246489	0.214989		0.361061			0.231837				0.300714	0.384322	0.430421	0.386111	0.452075	0.489574	0.499625	0.488091	0.558326	0.62151	0.622785	0.707298	0.692489	0.710099	0.686795	0.650089	0.620741	0.589166	0.59667	0.600628	0.615374	0.566316	0.593948	0.571091	0.569448	0.624819	0.630898	0.649935	0.623013
0.423002	0.434545	0.409003	0.417326	0.426089	0.435398	0.452629	0.433954	0.476425	0.482673	0.432017	0.39247	0.337786		0.282121	0.312992		0.335821				0.390408	0.445014	0.577032	0.583405	0.651783	0.6341	0.652244	0.6173	0.619997	0.630541	0.663917	0.728915	0.690578	0.658006	0.651135	0.650659	0.660702	0.69892	0.770035	0.759214	0.877643	0.901358	0.904885	0.871764	0.864797	0.92971	0.931456	0.913506	0.959511
0.680883	0.650787	0.712275	0.677423	0.614344	0.625046	0.865855	0.832214	0.826461	0.748186	0.723603	0.810911			0.862744						0.828439	0.901447	0.892959	0.910621	0.852695	0.948317	0.940135	1.01261	1.02013	1.10085	1.11746	1.17485	1.16902	1.18185	1.22483	1.19889	1.20339	1.21817	1.2037	1.20462	1.23353	1.21973	1.18142	1.30053	1.32304	1.53306	1.58143	1.65668	1.59413	1.58157
1.16165	1.19097	1.27336	1.08648	1.15863	1.21172	1.34268	1.41731	1.59101	1.73837				1.41914		1.05461	1.01865	0.998186		0.892531	0.82782	0.828007	0.681862	0.858238	0.793499	0.779552	0.693655	0.670989	0.699306	0.724091	0.663559	0.662555	0.676616	0.662963	0.648991	0.637069	0.709461	0.712354	0.7732	0.804649	0.85742	0.815664	0.763306	0.786175	0.807076	0.869767	0.824511	0.841718	0.865487	0.930525
0.583079	0.816864	1.3273	0.893344	0.883007	0.887993	1.01598	1.21913	1.24139	1.2251	1.19359	1.11713	1.10125	0.905904	0.965543	0.728122	0.716586	0.783272	0.71374	0.679829	0.741326	0.84562	0.712277	0.763942	0.66835	0.639377	0.802219	0.821342	0.875614	0.751057	0.964281	0.873632	0.936419	0.946068	0.93165	0.810421	0.830904	0.763147	0.859292	0.801864	0.853893	0.826322	0.858662	0.906744	0.933543	0.855836	0.87432	0.828086	0.956985	0.955583
0.683145	0.904605	0.945505	1.05902	1.2158	1.22581	1.19507	1.18454	1.25269	1.26649	1.30688	1.04899	0.989139	0.919589	0.909566	0.872701	0.904507	0.861394	0.885355	0.908812	0.904255	0.959486	0.912557	0.848125	0.888553	0.814267	0.835391	0.824079	0.877939	0.886489	0.922904	1.01903	0.945559	0.948861	0.883692	0.895346	0.852064	0.821653	0.859679	0.844607	0.850377	0.931112	0.915421	1.08938	1.00216	0.846226	0.824718	0.854853	0.798605	0.801028
0.97402	1.00957	1.008	0.955308	1.04694	1.15368	1.12487	0.971706	0.915702	0.743951	0.749387	0.719656	0.726194	0.7081	0.710148	0.683327	0.702433	0.698289	0.730519	0.677832	0.621163	0.569422	0.638386	0.665114	0.673494	0.717081	0.724862	0.699525	0.602645	0.573797	0.534463	0.527642	0.44344	0.531564	0.51097	0.481695	0.450304	0.428769	0.399442	0.389186	0.386843	0.377864	0.298237	0.292162	0.265304	0.309569	0.319402	0.324668	0.388702	0.423165
1.20868	1.19265	1.18289	1.22079	1.26297	1.29006	1.45316	1.47936	1.50132	1.57777	1.57297	1.63714	1.56382	1.60697	1.62223	1.60707	1.60591	1.58027	1.5857	1.65209	1.75249	1.73571	1.85136	1.79251	1.88652	1.8606	1.81966	1.87917	1.79977	1.76956	1.71871	1.72031	1.65176	1.59401	1.58756	1.53258	1.45721	1.42731	1.34729	1.26919	1.25723	1.15242	1.08877	1.00633	0.983554	0.928935	0.90054	0.865036	0.840392	0.870339
0.637128	0.668789	0.682175	0.626378	0.696189	0.721678	0.739848	0.781522	0.798885	0.877541	0.863908	0.93225	0.985299	1.04051	1.06185	1.02759	1.06759	1.015	1.02343	1.09394		0.682976		0.870901	0.957029	1.04273	1.33551	1.14386	1.3312	1.62229				1.90328	1.88754	0.882781		0.94371	1.08993	0.534627	0.504706	0.476077	0.437695	0.443717	0.437684	0.504608	0.486743	0.499375	0.511686	0.502528
1.41329	1.34611	1.038	0.984089	1.05658	1.0192	2.12097	1.68698	1.20031	2.15041	1.43319	1.87646	1.51385	1.4885	1.65937	1.33978	1.097	1.13694	0.982229	1.0787							1.1773	0.969983	1.21828	1.4144	1.14033	1.41978	1.21589		1.13509	1.30999	1.07571	1.16958	1.42663	1.01785	0.935239	1.04713	1.25884	1.02521	0.947298	1.07273	1.109	1.12995	1.2854	1.01436
0.367425	0.333046	0.456885	0.557749	0.770698	0.766693	0.774041	0.791659	0.795126	0.769843	0.719797	0.771873	0.709797	0.761369	0.912615	1.08079	1.18999	0.892956		1.11355	1.06402	1.05476	0.798621	0.839026	0.752818	0.686551	0.701386	0.763057	0.709275	0.712567	0.666987	0.732252	0.588341	0.644799	0.654624	0.617993	0.586586	0.618341	0.552176	0.613834	0.651433	0.709589	0.725469	0.597946	0.681295	0.548426	0.588577	0.577589	0.570343	0.517888
0.625875	0.685913	0.652162	0.600989	0.550192	0.537857	0.603554	0.716137	0.807262	0.970014	1.13021	1.24787	1.3705	1.54377	2.23905		0.754799	0.61782	0.289977	0.392669	0.422005	0.463193	0.510534	0.500543	0.479925	0.534539	0.611249	0.567877	0.575717	0.627754	0.683457	0.638013	0.610364	0.688586	0.698141	0.754192	0.782148	0.839326	0.884777	1.05532	0.991315	1.0025	1.07277	0.983483	1.04567	1.10195	1.07962	1.13553	1.09181	1.03464
0.786671	0.770806	0.842976	0.804405	0.917158	0.969741	1.03253	0.984224	1.1116	1.25856	1.27595	1.20772	1.21365	1.1547		1.43555	1.53026	1.55405	1.63224	1.62641	1.39192	1.30938	1.23198	1.15659	1.15385	1.14962	1.06578	1.10994	1.11434	1.20868	1.31623	1.39302	1.48873	1.54743	1.61729	1.60479	1.66939	1.68373	1.67652					1.43113		1.34104	1.33824	1.30918		1.25402
0.805073	0.817315	0.862816	0.917741	0.924438	0.785245	0.829211	0.663226	0.669372	0.495392	0.640849	0.579729	0.641706			0.679207	0.412863		0.425893	0.318651			0.355371	0.512754	0.493139	0.324824	0.291377	0.392573	0.347461	0.351218	0.542456	0.54899	0.715483	0.613299	0.714193	0.760333	0.771809	0.786328	0.818974	0.825265	0.817025	0.789756	0.794674	0.707181	0.786286	0.719888	0.787708	0.780047	0.752716	0.835397
0.316077	0.351594	0.32364	0.366682	0.432716	0.487803	0.617673	0.674891	1.11094	1.95076	0.635718	0.587318	0.317465		0.276009	0.190795	0.552228	0.836754	0.908263	0.7537	0.591628	0.526379	0.473934	0.473633	0.494634	0.48173	0.411532	0.440627	0.41941	0.450969	0.435477	0.430234	0.440446	0.452192	0.448234	0.425975	0.422916	0.417097	0.424517	0.465209	0.453234	0.457777	0.506758	0.461418	0.476123	0.469698	0.467629	0.455527	0.455778
0.766768	0.896697	0.764538	0.997165	0.910252	0.792755	1.01804	0.817534	1.03123	0.89904	0.900704			1.17605	1.25602	1.17886	1.34945	1.28127	1.26185	1.24757	1.26919	1.19233	1.26832	1.2121	1.3031		1.38178	1.40318		1.575	1.63914	1.35541	1.28223	1.39333	1.49707	1.36031	1.38858	1.10218	1.1105	1.2839	1.08131	1.12968	1.17633	1.07099	1.24561	1.02298	0.994469	1.11777	0.705611	0.932268
0.202078	0.270806	0.34429	0.403931	0.458457	0.476614	0.473947	0.499196	0.596354	0.523077	0.525424								0.686614		0.727125	0.782522	0.783229	0.878748	0.830777	0.887105	0.801445	0.759449	0.723447	0.648094	0.645284	0.652441	0.648992	0.614153	0.646556	0.618749	0.660163	0.728549	0.725375	0.781631	0.727034	0.717386	0.680147	0.660752	0.697499	0.669773	0.664104	0.659429	0.673588	0.667512
0.271528	0.29008	0.343319	0.382153	0.453764	0.439848	0.470638	0.429316	0.424315	0.454627	0.415372					0.399152	0.43139	0.41329				0.443306		0.39012	0.365746	0.364914	0.378257	0.401891	0.369659	0.365763	0.393556	0.366795	0.375375	0.383372	0.417668	0.404083	0.389451	0.407792	0.421059	0.417397	0.414831	0.448369	0.477947	0.419083	0.439342	0.432496	0.442013	0.483403	0.469964	0.474851
0.675425	0.845131	0.784736	0.822392	0.826986	0.780961	0.832174	0.834614	0.770382	0.907141		0.831234	0.906215		0.827109		0.929208	0.859332	0.910915	0.964191	0.900073				0.712866	0.721558	0.762245	0.810572	0.691773	0.687966	0.740507	0.765167	0.744771	0.754228	0.739631	0.802489	0.767281	0.772456	0.834301	0.867671	0.935403	0.99318	1.01694	1.02198	0.993825	1.11268	1.04133	0.975822	0.899039	0.934144
0.961551	0.893033	0.800416	0.822807	0.694375	0.717641	0.80526	0.790304	0.817688								0.920413		0.853814	0.944416	0.876303	0.857448	0.818932	0.776364	0.765054	0.753506	0.739953	0.723517	0.680542	0.687744	0.674003	0.738558	0.717186	0.737962	0.769536	0.729067	0.732335	0.802424	0.749671	0.652141		0.666772	0.640848	0.586608	0.584602	0.572952	0.563838	0.511557	0.487394	0.46137
0.666025	0.687226	0.710582	0.720712	0.813566	0.832486	0.797694	0.861399	0.794229		0.949922	1.10214				1.33945	1.57292	1.57641	1.43569	1.29296	1.18561	1.21283	1.32244	1.31833	1.2385	1.29123	1.47149	1.28868	1.30269	1.32642	1.38364	1.44384	1.37982		1.62932	1.45832	1.44261	1.3878	1.35696	1.32374	1.32562		0.613993	0.984224	0.920077	0.863452	0.870834	0.788877	0.745469	0.75848
0.700803	0.726384	0.771447	0.767299	0.806181	0.841572		0.899611	0.950044	0.945068			1.05387		1.01	0.988914	1.063					0.878111	0.884081	0.922305	0.861742	0.85191	0.948198	0.939718	0.955945	1.01875	1.03609	1.03605	1.07863	1.05581	1.08075	1.09878	1.07702	1.06963	1.06752	1.06048	1.06097	1.0315	0.990703	0.977275	0.9251	0.912703	0.887665	0.920522	0.898195	0.904434
0.773316	0.777541	0.773302		0.719726	0.794749	0.722496	0.716393	0.757436	0.67772	0.707583	0.707467	0.654491	0.744317				0.896872			1.00333	0.86047	0.731343	0.868854	0.808885	0.592675	0.76126	0.778455		0.655647	0.659266	0.701969	0.737809	0.795875	0.893778	0.897787	0.79872	0.699457		0.773136	0.772805	0.892647	0.919774	0.900919	0.89903	0.859609	0.790873	0.831461	0.791506	0.82067
0.753588	0.713341	0.884673	0.894992	0.771107	0.826177	0.808426	0.746162	0.734304	0.715431	0.749238	0.69902	0.62749	0.597781	0.68647	0.690417	0.806207	0.776415	0.738655	0.752099	0.682283		0.774856	0.733383	0.667723	0.694064	0.67937	0.666795	0.713418	0.727155	0.739598	0.744475	0.661079	0.655329	0.686262	0.676145	0.660262	0.624829	0.685975	0.681637	0.65535	0.79436	0.841797	0.781931	0.787198	0.698714	0.752793	0.794922	0.802915	0.738673
0.83088	0.8326	0.867443	0.875549	0.826639	0.878573	0.910362	0.922247	0.910116	0.957547	0.949019	0.963415	0.955419	0.906433	0.820198	0.896875	0.871708	0.771201			1.09748	1.02437	1.04483	1.15421	1.09199	0.864346	0.954177	0.838443	0.85599	0.698892	0.810079	0.868041	0.689361	0.687889	0.619424	0.658037	0.633538	0.690146	0.623146	0.751012	1.04527	1.99252	1.05458	0.986431	1.00847				0.975743	0.931029
1.54032	1.53544	1.70833	1.66362	1.57051	1.51016	1.62043	1.43337	1.42237	1.28484	1.26723	1.38855	1.33184	1.2233	1.33915	1.319							1.67608			1.9562	2.06856	1.80307		1.89267	2.09836	1.68526	1.78561	1.60704	1.69611	1.69305	1.56037	1.35898	1.34467	1.50279	1.35623	1.28932	1.3843	1.68136	1.84687	1.88762	1.58974	1.7863	1.70427	1.65324
0.253003	0.263621	0.348725	0.467735	0.524385	0.564928	0.600092	0.646668	0.657941	0.589569	0.65057	0.658894	0.657422	0.757405	0.745674		0.831652			0.903453			1.01742		1.0857	1.06118	1.05172	1.08652	1.03438		1.03168	0.957122	0.930307	1.06816	1.04596	1.07273	1.00248	0.981762	1.0369	1.05069	1.04838	1.06813	1.12893	1.26194	1.39922	1.49449	1.49795	1.41223	1.34674	1.13566
3.36914	3.39528	3.13822	3.12986	2.7262	2.76385	2.9933	2.66837	2.90652	2.19568	3.85995	1.66393	2.45517	3.11121		3.24664	3.05673	2.1183	2.28074	4.20573	5.81616	5.10346	4.67445	4.40313				2.3238	2.00096	2.35235	2.1928	2.37457	2.70092	2.74113		0.886103	1.01054		0.849159	1.27086	1.37529	1.7732	1.91709	1.78217	1.62284	1.50577	1.26825	1.27611	1.19664	0.629345
0.363561	0.281192	0.371692	0.346155	0.371539	0.396329	0.430869	0.577351	0.601123	0.573304	0.560605	0.546493	0.571667							0.671724	0.639405	0.665946	0.621537	0.637522	0.626136	0.618853	0.676593	0.603642	0.594779	0.580684	0.592343	0.614747	0.606636	0.564305	0.598886	0.542012	0.538518	0.493327	0.486344	0.508509	0.544375	0.574186	0.549634	0.551344	0.523376	0.484066	0.496946	0.459311	0.4154	0.468459
0.472586	0.520058	0.501171	0.562466	0.514542	0.52972	0.481702	0.507406	0.545076	0.501247		0.557937	0.577877	0.625232	0.649363		0.739573		0.952827				0.838626		0.800921	0.930097	0.82326	0.904722	0.942638	1.09986	1.12821	1.24827	1.15195	1.32233	1.44195	1.62946	1.41604	1.45636	1.46947	1.49794	1.3971	1.36802	1.27878	1.15291	1.12982	1.06604	1.06354	0.955323	0.931079	1.00382
1.09074	1.26835	1.26097	1.26868	1.45874	1.73463	1.62311	1.50847	1.39918						0.762366	0.849656	0.79897	0.832923	0.794129	0.829405	0.833612				0.764355		0.95979	0.918617	0.883546	0.854275	0.861335	0.80941	0.855129	0.829764	0.906714	0.9378	0.962693	1.02144	1.08114	1.23407	1.17355	1.17249	1.10193	1.14545	1.12102	1.14185	1.07101	1.1186	1.07613	1.06325
0.701823	0.668271	0.684322	0.753779	0.852353	0.874109	0.872163	0.925403		0.821807	0.807515	0.858018	0.883881					1.18968			1.03902	1.02061	1.04117	1.14206	1.25988	1.17373	1.16558	0.969711	1.07906	0.953161	1.142	1.07605	1.0776	0.962689	1.14279	1.11188	1.03061	0.994713	0.977042	0.901355	0.896366	0.968648	0.893823	0.858293	0.866084	0.751108	0.746928	0.758731	0.725949	0.838361
0.57684	0.610691	0.620892	0.673447	0.692829	0.781871	0.849701		0.717079	0.7871	0.76546	0.734118		0.716533	0.648881							0.723262	0.773187	0.72597	0.659069	0.640124	0.618223	0.628859	0.591765	0.553062	0.545315	0.52444	0.479089	0.511703	0.455178	0.494304	0.511889	0.495897	0.535988	0.540976	0.573138	0.584357	0.603416	0.597033	0.600289	0.604005	0.623773	0.628757	0.58278	0.524798
0.778265	0.768179	0.710813	0.680029	0.648621	0.594457	0.534612	0.536765	0.596128	0.675789	0.814667	0.924753	0.999535	1.03643	1.07305	1.16748	1.27225	1.33476	1.35039	1.30584	1.23835	1.18599	1.15822	1.05239	0.979051	0.943348	0.856515	0.823274	0.753524	0.715379	0.704498	0.703176	0.663916	0.640957	0.611422	0.601088	0.582616	0.576921	0.545764	0.539281	0.546456	0.579913	0.587128	0.581721	0.544237	0.525522	0.514265	0.51476	0.517519	0.511924
0.602961	0.648767	0.605683	0.611182	0.633154	0.619135	0.63497	0.645482	0.727037	0.811773	0.831905	0.807708	0.764904	0.711827	0.654417	0.589059	0.561949	0.551401	0.531291	0.5356	0.54324	0.576741	0.532792	0.5519	0.588159	0.710999		0.938641	1.06322	1.06203	1.03011	0.962599	0.878211	0.876224	0.82691	0.858699	0.843644	0.816977	0.853564	0.883911	0.863745	0.886013	0.863655	0.848141	0.875523	0.885003	0.870059	0.841861	0.919964	0.969025
0.718041	0.70757	0.691422	0.702669	0.70129	0.600103	0.575268	0.567774	0.575654	0.643763	0.641876	0.675756	0.73066	0.725164	0.741998	0.819083	0.826039	0.84186	0.757009	0.791263	0.73408	0.717783	0.72174	0.729184	0.718856	0.698525				0.856161	0.810294	0.871221		0.906029	0.870081	0.862418	0.848748	0.85461	0.867733	0.859366			0.846313		0.926657	0.925487	0.92265	0.928131	0.933742	0.855072
0.508052	0.502207	0.678428	0.613692	0.573273	0.514167	0.490431	0.44623	0.462782	0.516187	0.503798	0.477109	0.476702	0.536594		0.581636	0.587843	0.617132	0.593973	0.657093	0.61544	0.59326	0.60528	0.608044	0.549896	0.505543	0.492588	0.457111	0.500839	0.500385	0.493862	0.50872	0.528603	0.483962	0.514909	0.531381	0.529027	0.532859	0.501182	0.537749	0.56005	0.516993	0.516538	0.502814	0.535463	0.511417	0.516299	0.536724	0.549644	0.556368
0.767508	0.847862	0.866455	0.902597	0.92264	0.898394	0.885215	0.867065	0.951673	0.948363	0.970728		0.909862		1.0905		1.16547	1.14477	1.18763	1.36278	1.46905	1.3133	1.31588	1.18537	1.17812	1.32435	1.26257	1.31704	1.32893		1.52698	1.49659	1.47683	1.39332			1.1067		1.01578	1.08774	1.11679	1.08366	1.02737	1.01493	0.920315	0.873797	0.930406	0.784716	0.837699	0.800513
0.829251	0.839216	0.965837		0.842448	0.789927	0.820901	0.846401	0.868263	0.873894	0.894917	0.928857		1.04101	1.04763	1.0961	1.0771		1.1134	1.13856	1.13893	1.0815	1.08803	0.984825	1.10753	0.953468	1.13914	1.08441	1.02802	1.1629	1.10576		1.18966	1.27115	1.32661	1.23914	1.32989	1.3486	1.39345	1.44458	1.45377	1.45805		1.40543	1.44559	1.38181	1.41722	1.35224	1.43914	1.21926
0.604488	0.643376	0.683881	0.672856	0.669365	0.634027	0.627574	0.604598	0.563747	0.548324	0.544623	0.555062	0.547545	0.564858	0.582507	0.587415	0.632518	0.628842	0.68708	0.610232	0.59537	0.597391	0.625773	0.643281	0.683574	0.691871	0.74775			0.854896	0.91521	0.893649	0.824794	0.885475						1.33714	1.38502	1.3623		1.34246	1.29713	1.29045		0.965936	1.13831	1.12216
0.438702	0.432915	0.416804	0.43658	0.409075	0.467836	0.509366	0.524817	0.751636	0.779856	0.919169						1.06139		1.10755	1.22916	1.11001	0.999503	1.12253	1.11608	1.13782	1.12355	1.08385	1.10575	1.03875	1.04037	1.01198	1.0075	0.990837	0.974298	0.999011	1.02666	1.05798	1.07992	1.05934	1.02814	0.992533	0.922809	0.859666	0.816706	0.807178	0.727458	0.731193	0.752249	0.687131	0.642405
0.462173	0.298509	0.20604	0.570937		0.556378				0.656925			0.965971	0.812276	0.937186	0.892679	0.925235	0.938614	0.969378	1.03846	1.01715	1.15804	1.09537	1.11424	1.19266	1.25089	1.26318	1.2408	1.24329	1.21923	1.24183	1.26321	1.26157	1.14411	1.26683	1.13127	1.14254	1.10297	1.0695	1.21425	1.18685	1.15136	1.00814	0.912015	0.912971	0.759123	0.739853	0.755814	0.720711	0.663927
0.627271	0.661482	0.685134	0.664106	0.672143	0.677275	0.686096	0.683118	0.692068	0.742368	0.673911	0.677014	0.637279	0.661349	0.671148	0.676978	0.700526	0.815655	0.953451	1.08029	1.32784	1.42008	0.697411	0.655145	0.641156	0.62397	0.666962	0.653763	0.618631	0.644701	0.672973	0.63428	0.612936	0.695726	0.791159	0.862029	0.90511	1.04575	1.07008	1.12583	1.17201	1.06959	1.22894	1.30944	1.40167	1.56258	1.54776	1.51312	1.51143	1.55986
1.01798	1.08307	1.14576	1.1629	1.05219	1.16164	1.29282	1.15222	1.05991	0.957306	0.927225	0.912033	0.885174	0.868541	0.786427	0.828086		0.954141					1.45981	1.65893	1.75765		1.7445	1.80547	1.89606	1.87846		1.93914	1.95659	1.92939	1.93638	1.95195	1.95444	1.93503	1.79981	1.77629	1.73242	1.66195	1.54323	1.49078	1.42654	1.43909	1.50886	1.53676	1.57657	1.60572
0.708959	0.77923	0.717024	0.815054	0.753793	0.783916	0.815321	0.790458	0.778789	0.813006	0.662021	0.809291			1.02714	1.20319	1.06835						1.17321	1.10311	1.17701	1.06617	1.09296	0.986756			0.984665	0.911902			0.813209	0.816718	0.793886	0.725409	0.740512	0.822984	0.861891	0.882823	0.950914	0.954886	0.892696	0.911305	0.85349	0.873133	0.860804	0.884617
0.496364	0.597525	0.76614	0.813296	0.751332	0.743562	0.924393	0.886159	0.859834	0.779134	0.670133	0.57497	0.495749	0.456899	0.441143	0.499853	0.604139	0.724346			0.738178	0.760875		0.755127	0.772749	0.909101	0.889647	0.804833	0.868493	0.880412	0.782265	0.827248	0.763235	0.707753	0.68491	0.61564	0.580916	0.558979	0.547288	0.533734	0.506854	0.525356	0.578086	0.573955	0.599648	0.584323	0.585013	0.583876	0.60462	0.608978
1.8111	2.03198	2.12342	1.73069	1.78964	1.80425	1.95618	1.99405	1.90662	1.94352	1.8598	1.99186	2.0216	1.98599	2.12148	1.65875	1.60812		1.86196	1.97677	2.01847	1.75179	1.7755	1.73235						2.19069	2.18221	1.915	1.81806	1.74043	1.81404	2.7535	3.70818	3.51028	3.3916	2.55313	2.39224	2.79664	2.91511	3.02425	2.80698	2.94474	2.46477	2.2092	2.11218	2.68544
0.68671	0.7866	0.92706	1.13404	1.24002	1.36263	1.42548	1.49996	1.55145	1.61562	1.63378		1.47912	1.61657	1.51533	1.45031	1.4483			1.28679	1.20091	1.18292	1.17712	1.15661	1.10309	0.977629	1.06649	1.11954	1.13063	1.07982	1.19583	1.32768	1.44862	1.36646	1.39488	1.33351	1.47673		1.61149	1.65957	1.70677	1.65731	1.76625	1.69704	1.70923	1.75946	1.75592	1.68159	1.70089	1.59546
0.491161	0.491891	0.591175	0.634681	0.683768	0.637068	0.702623	0.728427	0.650317	0.670356		0.648372						0.777878	0.759386	0.72579	0.686208	0.69001	0.607178	0.590208	0.599146	0.583924	0.579173	0.570303	0.50226	0.604167		0.530153	0.557521	0.596366	0.596169	0.611402	0.603422	0.610238	0.599542	0.595382	0.605482	0.604763	0.602096	0.550082	0.567471	0.594652	0.611547	0.612918	0.651339	0.659196
0.253272	0.320752	0.343619	0.389657	0.438026	0.503146	0.367386	0.367148	0.43932	0.44649		0.737388	0.583913	0.583743	0.831344	1.04886	0.791789	0.835059	0.724662	0.778113	0.935219	0.661337					0.701707	0.678344	0.583899	0.800419	0.869355	0.759957	1.28577	1.35392	1.73544	1.61382	1.50111	1.62069	1.45008	0.785498	0.750877	0.876761	0.896334	0.832485	0.716503	0.710987	0.866715	0.631784	0.911805	0.839479
0.329121	0.305366	0.331928	0.286153	0.271752	0.36562					0.541754	0.578897	0.53136	0.525374	0.537824	0.657983		0.659593	0.756847	0.8076		0.720882	0.750788	0.765976	0.79683	0.862572	0.904473	0.901241	0.910568	0.90525	0.936937	0.816703	0.716418	0.70467	0.679817	0.60323	0.591585	0.595581	0.570877	0.609816	0.628129	0.664755	0.649083	0.703242	0.754366	0.8109	0.873565	0.904152	0.956963	0.951957
0.742123	0.749329	0.895255	1.67518	0.650183		0.352453	0.476602	0.403867					0.423738	0.456031	0.400839								0.352095	0.362639	0.404318		0.377048	0.365357	0.337931	0.377046	0.394642	0.371245	0.365139	0.351247	0.35459	0.372148	0.360138	0.368221	0.376212	0.340974	0.44137	0.382235	0.39596	0.399439	0.443844		0.462278	0.442606	0.457909
0.411875	0.38675	0.442373	0.465604	0.481326	0.545433	0.61752	0.71249	0.767533	0.829904	0.899144	0.953701	0.845141		0.776947	0.938913	1.06111	0.938333	0.974093	0.902391	1.01817	0.900135	0.92756	0.944178	1.04941	1.04801	1.18484	1.29211	1.23657	1.22982	1.2151	1.33071	1.27416	1.17571	1.36082	1.51256	1.40967	1.49658	1.44205	1.48166	1.24073	1.20204	1.07751	0.987764	0.956587	0.846153	0.90521	0.981838	0.944188	1.11725
0.218413	0.266557	0.326609	0.501615	0.980973	0.727236	0.480896	0.411327	0.335421	0.649247		0.991323	0.978118	0.80238	0.611688	0.508637	0.452904	0.429167	0.448626	0.455958	0.492703	0.53183	0.593498	0.632474	0.617924	0.693625	0.679108	0.709085	0.809346	0.797336	0.851758	0.922862	0.929509	0.886105	0.853164	0.897685	0.966898	0.916031	0.981341	0.932933	0.938333	0.94436	0.933678	0.936362	0.890998	0.829537	0.795728	0.77902	0.772046	0.759582
0.80785	0.84039	0.798406	0.881788	0.891955	0.874026		0.986193	1.01011				1.17551	1.19892	1.08811	1.06959	1.07795	1.09238	0.974026	1.02312		0.982075		0.882482			1.29931	0.684097		0.700892	0.673687	0.609329	0.618291	0.648681	0.632766	0.634399	0.696971	0.675286	0.680976	0.690316	0.68652	0.657082	0.641826	0.612273	0.592763	0.618831	0.560685	0.583872	0.567914	0.58652
0.85192	0.85468	0.855648				0.700623	0.685362	0.598141		0.530942	0.450924	0.454884	0.477985	0.565474	0.596959	0.570104	0.529362	0.518788	0.387388	0.43713		0.48266	0.397571	0.427487	0.32021	0.377026	0.373589	0.460207	0.529342	0.533474	0.550273	0.509386	0.555266	0.557275	0.475903	0.501654	0.491805	0.518725	0.552086	0.594363	0.635667	0.664856	0.668971	0.689729	0.705953	0.694719	0.722712	0.632591	0.686922
0.89325	0.870465	0.761674	0.78225	0.744136	0.674913	0.683568	0.705994	0.717794	0.793137	0.802976	0.781844	0.775173	0.822109							0.904837	0.822827	0.73418	0.669899	0.751944		0.755376		0.818796	0.781267	0.760219		0.839221	0.837668	0.717144	0.788976	0.785072	0.748813	0.83342	0.894787	0.949632	0.954383	0.971131	0.945115	0.957857	0.881867	0.889654	0.866359	0.825989	0.814443
1.49791	0.830856	0.792797	0.683297	0.772047	0.851116	0.80681	0.870558				0.699646		0.784258	0.797637	0.80029		0.790696	0.807119	0.838517	0.894324	0.839873	0.722722	0.759901	0.900369	0.789683	0.891125	0.997026	1.02756	0.895572	0.896337	0.857141	0.899545	0.850043	0.873061	1.0002	0.954352	1.07864	1.06646	0.9438	0.948635	0.965165	0.882018	0.830389	0.771248	0.766667	0.719976	0.771415	0.713981	0.791849
0.495148	0.747614	0.981967	0.757507	0.657958	0.380391	0.432347		0.39599				0.8642	0.806313	0.711203	0.898829	1.05266	1.02393	1.16164	1.31569	1.325	1.38089	1.38632	1.01252	0.937154		1.0096		0.988054	0.769636			0.985674	0.901938	0.623503	0.647761	0.642195		0.846289		0.78754	0.775208	0.891626	0.840459	0.612441	0.542408	0.52399	0.658942	0.632236	0.467093
1.94433	0.537349	0.407291	0.134832	0.522817	0.804218	0.95014	1.00765	0.746768	0.663844	0.645725	0.709207	0.668332	0.579403	0.651086	0.565571	0.584339	0.535683	0.598937	0.584149	0.560653	0.565843	0.527106	0.51152	0.551103	0.601254	0.56212	0.581362	0.602981	0.599551	0.612107	0.587594	0.611384	0.615931	0.661148	0.6131	0.608254	0.651602	0.628352	0.69371	0.684807	0.6295	0.68881	0.702042	0.701274	0.741989	0.772857	0.674661	0.711024	0.720829
0.745358	1.15529	1.15223	1.20174	1.21707	1.42053	1.73817	1.69795	1.23574	1.22443	1.38944	1.33994	1.24	1.13284	0.726146	1.21421	1.74017	1.59231	1.50352	1.50936	1.54074	1.63201	1.65414	1.78706	1.95464	2.02994	1.95224	2.09761			1.86864			1.89605	1.94125	1.5463	1.66981	1.49516	1.52854		1.79072	2.25862	1.8904	2.263	1.5551	2.40285	1.75172	1.68318	1.92491	1.56821
0.354426	0.351793	0.35848		0.316413	0.342252				0.315942		0.383853	0.412374	0.367247	0.498152		0.565083	0.55194	0.601543		0.471428	0.465402	0.410524	0.389051	0.342518	0.355631	0.341124	0.36062	0.359361	0.357319	0.358779	0.394905	0.365579	0.410693	0.414332	0.424623	0.422428	0.456519	0.443645	0.459414	0.484838	0.532742	0.501489	0.489288	0.4952	0.457848	0.439068	0.455623	0.438146	0.414729
1.13052	1.25707	1.09286	1.16173	1.28188	1.2621	1.29202	1.29153	1.19843	1.24482	1.26848	1.32275	1.37671	1.45219	1.50689	1.47331	1.64283	1.48297	1.50141	1.52333	1.69979	1.63334	1.87103	0.748433	0.757893	0.542262	0.407757	0.593589	0.665126	1.15607	1.41457	1.67807	1.77852	1.9127	1.79351	1.65255	1.61457	1.57223	1.47443	1.4229	1.21254	1.25241	1.13918	1.09751	1.03308	0.989185	1.00609	1.05865	1.02144	1.11583
0.751503	0.82391	0.873905	0.902123	0.876512	0.838606	0.845547	0.907146	0.888555	1.07277	1.10899	1.1772	1.38337	1.31796	1.3133	1.20561	1.18738	1.22541	1.26373		1.24367	1.2643	1.16144	1.12829	1.18825	1.09719	1.11609	1.15494	1.12268	1.09429	1.10815	1.0956	1.10991	1.13473	1.19267	1.21501	1.24297	1.25157	1.21215	1.29236	1.3289	1.34575	1.31232	1.25696	1.30157	1.29596	1.28638	1.31257	1.35422	1.46223
0.423337	0.463472	0.486635	0.494916	0.513878	0.512779	0.491521	0.485504	0.449455	0.391053	0.41459	0.403626	0.454008	0.468557	0.460287	0.469833	0.422761	0.520322			0.541204	0.586459	0.591536	0.616114	0.694272	0.827736	0.951595	1.03912	1.09945	1.12563	1.14247	1.16934	1.20212	1.1729	0.980113	0.857968	0.729058	0.683136	0.639246	0.661089	0.72057	0.767869	0.932895	1.08624	1.06492	1.09916	1.11618	1.22408	1.13775	0.642766
0.564921	0.42022	0.429932	0.623251	0.766124	0.929306	1.03774	0.91789	0.859731	0.907367	1.03391	1.05146	1.12158	1.21614	1.16412	1.20468	1.24962		1.30628	1.38159	1.23259			1.58102	1.51189	1.50609	1.53175	1.57193	1.6046	1.55473	1.47079	1.42905	1.3324	1.33468	1.37282	1.37714	1.37612	1.39811	1.34708	1.34602	1.36878	1.3412	1.28445	1.26902	1.25915	1.22958	1.28333	1.29804	1.24661	1.28101
1.21678	1.26918	1.24386	1.10292	1.12138	1.15866	1.19612	1.55397	2.92672	3.53231	1.73474	3.32162	3.14003	3.59922	3.09856		2.85634	2.73043	2.62238	2.93339	2.38168	2.41256	2.45625	2.39066	2.26521	2.04665	2.39741	2.48418	2.50363	2.77848	2.81214	3.09364	3.09082	3.49632	3.28465	3.26147	2.95875	2.58893	2.24005	2.17501	2.26328	2.27214	1.98959	2.19608	2.06823	2.03831	1.97716	1.91301	1.95849	2.08947
0.794025	0.766729	0.621357	0.442564		0.390839				0.480594	0.547365	0.464823	0.480899	0.448329	0.446093	0.426141	0.384109	0.370958	0.380172	0.361793	0.393952	0.366499	0.329383	0.332316	0.325051	0.324147	0.326554	0.35833	0.428993	0.466689	0.497611	0.600257	0.604487	0.644766	0.651238	0.701201	0.718669	0.752567	0.762076	0.851545	0.852528	0.840759	0.80526	0.825441	0.806744	0.805639	1.18501	0.916286	0.872889	0.666039
0.830881	0.854626	0.960426	1.35552	1.49121	1.17627	1.23028	1.26861	1.18239	1.25342	1.31409	1.22906	1.25065	1.2122	1.21068	1.0965		1.11353	1.05642	1.07328	1.08755	1.14492	1.34031	1.26421	1.28528	1.49833	1.60255		1.38953	1.77502	1.85846	1.11067	1.08103	1.11798	1.08055	1.02966	1.08467					1.10346			1.09874	1.05462	1.02472	1.00086	0.948531	0.872839
0.603248	0.465512	0.434214	0.430985	0.503432	0.613494	0.503303	0.495898	0.521537	0.548957	0.588125	0.594515	0.480862	0.436644	0.740013	0.870531										0.62067	0.595669	0.602212	0.625209	0.650801	0.612572			1.04353	0.956334	0.836265	0.821929	0.831211	0.777951	0.738936	0.779658	0.817307	0.756436	0.738275	0.748886	0.646526	0.604539	0.676048	0.673877	0.650144
0.166372	0.158807	0.192847	0.193368	0.17906	0.182969	0.150073	0.187431	0.0934275	0.124321	0.0604943	0.0835707	0.0736525	0.0737068		0.0803825			0.0766957	0.15494			0.252511	0.236882	0.257404	0.233588	0.206059	0.24327	0.296021	0.299992	0.362655	0.392192	0.382506	0.363257	0.35572	0.387504	0.431064	0.412859	0.379805	0.367367	0.445628	0.421317	0.397573	0.411274	0.436548	0.482573	0.464739	0.398757	0.527289	0.541
0.505749	0.577491	0.601059	0.607603	0.717466	0.693774	0.735299	0.700217	0.705765			0.578953	0.542516	0.505858	0.498705	0.581456	0.61457				0.518765	0.509376	0.466081	0.477063	0.422654	0.384231	0.393726	0.387437	0.367528	0.370338	0.37814	0.378686	0.387889	0.434623	0.430889	0.417306	0.453784	0.467862	0.554912	0.639123	0.643587	0.632372	0.682496	0.69982	0.702478	0.746549	0.807483	0.835577	0.879358	0.845152
0.890084	0.777466	0.802591	0.700887	0.688743	0.742227	0.735614	0.765665	0.726529	0.722518	0.737338	0.761696	0.670665	0.755686	0.748777	0.732591	0.790725	0.81647	0.826099	0.836015	0.812116	0.818662	0.807455	0.815941	0.727724	0.726216	0.687333	0.684186	0.613072	0.6694	0.64484	0.662523	0.641848	0.684011	0.676665	0.652284	0.681609	0.632523	0.665688	0.637212	0.581768	0.566165	0.544959	0.53668	0.45982	0.438301	0.495506	0.496116	0.480301	0.473037
0.262823	0.343903	0.453044	0.558721	0.608121	0.671566	0.690863	0.727788	0.849313	0.924028	1.17169	1.71057	0.756755	0.632977	0.487465		0.700614	0.1722	0.751342	0.774495	0.724697	0.6089		0.508891		0.662618	0.728323	0.618426	0.691679	0.703035	0.659097	0.611546	0.616717	0.592996	0.507819	0.569915	0.54396	0.547097	0.606861	0.553551	0.53633	0.533973	0.554012	0.465888	0.521203	0.499661	0.596368	0.622476	0.666451	0.945844
0.645668	0.676568	0.713983	0.770313	0.768266	0.710596	0.67402	0.683806	0.652981			0.751935				0.768009	0.839613	0.882056		0.845425	0.809887	0.824206		0.903668	0.970786	1.01339	1.06868	1.10723	1.18335	1.25106	1.3078	1.32001	1.37689	1.34813	1.34276	1.25094	1.1	0.953342	0.869204	0.791881	0.765489	0.692319	0.668017	0.599836	0.568278	0.567848	0.548719	0.566817	0.537711	0.528536
1.40207	1.18314	1.60187	1.30434	1.32146	1.32546	1.23947	1.14725	1.55974	1.10609	1.00524	0.906141	0.89428	0.828807	0.795989	0.708273	0.825248	0.838276	0.684942	0.853971		0.76892	0.751277		0.652044	0.651027	0.642734	0.599706	0.549869	0.562799	0.591358	0.501414	0.571716	0.556898	0.584458	0.575678	0.536693	0.546126	0.553572	0.538473	0.518578	0.469528		0.487143	0.499635	0.506165	0.52333	0.513149		0.532408
0.343719	0.317054	0.298432		0.274712	0.260892	0.251614	0.263778	0.281056	0.27208	0.280641	0.275174	0.299705	0.322722	0.286921	0.282423	0.297331	0.268829	0.281409	0.236095	0.291206	0.286569	0.238094	0.221272	0.181909	0.221242	0.216041	0.172299	0.196141	0.252615	0.271436	0.252315	0.206067	0.25732	0.25521	0.280563	0.227502	0.194096	0.183223	0.19203	0.2464	0.298894	0.200064	0.149656	0.15703	0.164508	0.160472	0.121906	0.175224	0.160175
0.441438	0.434962	0.505462	0.548637	0.703797	0.773343	0.827152	0.860578	0.877708	0.962559	0.911158	1.00283	0.977862	1.05095	1.11414	1.07842	1.09191	1.02092	0.992999	0.938719	0.766828	0.763683	0.816484	0.724563	0.806467	1.00274	0.929138	0.955169	1.04299	1.23616	1.50537	1.57857	0.648292	0.564234	0.341213	0.214155	1.6628	1.6002	1.17625	1.02831	0.949943	0.879115	0.786378	0.753706	0.914038	0.914071	0.987391	0.864297	0.902933	0.764453
1.10858	1.05398	1.10881	1.1197	1.09133	1.06538	1.41776	0.963722	1.05998	1.112	1.26336	1.36056	1.63108	1.89796	1.8566			1.94497	1.89814	2.03036	1.84556	2.02393	1.99346	2.05016	1.72411	1.66114	1.58417	1.55244	1.53556	1.81498	2.33774	2.13865	1.94378	1.88528	1.73861	1.72033	1.48265	2.02359	1.59962	2.09803	3.02795	3.27013	4.09308	2.89095	2.74672	2.72265	1.83594	2.58213	2.60003	2.63815
0.351362	0.3042	0.369452	0.450799	0.450303	0.490095	0.51988	0.460004	0.455086	0.417125	0.379951	0.377758	0.361504	0.415699	0.321842	0.35749	0.34986	0.394629	0.405806	0.412416	0.445657	0.479162	0.499729	0.497162	0.506628	0.559286	0.610841	0.569295	0.59877	0.511865	0.536431	0.560097	0.540663	0.528507	0.424987	0.382027	0.179896	0.220863	0.238476	0.356638	0.500668		0.45806	0.578851	0.281922	0.268269	0.313913	0.336413	0.253908	0.181321
0.623166	0.709418	0.743483	0.946484	0.850312	0.937957	1.02378	1.19464	1.34251	1.35314	1.38607		1.06659	1.05162	1.22925						0.923119		0.89163	0.957067	0.898417	0.894903	0.81369	0.833545	0.833217	0.830943	0.844826	0.821788		0.805534	0.955119	0.790632			0.894264	0.753495	0.834263	0.809904	0.812449	0.837977	0.858845	0.860327	0.920919	0.97875	0.934023	0.897116
1.24313	1.28944	1.4527	1.36209	1.40673	1.37293	1.39889	1.38688	1.25336	1.28675	1.28387	1.29586	1.36699	1.46534	1.52855	1.55468	1.57669	1.59901	1.57254	1.67596	1.57818	1.57751	1.57588	1.49637	1.38689	1.25203	1.31509	1.42928	1.30662	1.40347	1.53034	1.52981	1.46525	1.67994	1.73526	1.5172	1.56132	1.58121	1.57379	1.52233	1.52382	1.70603	1.62892	1.70082	1.64348	1.6664	1.5223	1.70423	1.67502	1.64089
0.800788	0.706973	0.759956	0.820383	0.917562	0.902438	0.868348	0.979767	0.980935	1.0764	1.11459	1.0622	1.14002	1.34191	1.35033	1.23947	1.2944	1.37221	1.35869	1.2232	1.21452	1.10589	1.19259	1.10738	1.02712	1.15376	1.07206	0.99538	0.95243	1.05202	1.02813	1.05885	0.954007	0.871849	0.842104	0.91	0.936152	0.86803	0.783588	0.684552	0.533144	0.506156	0.4609	1.03069	0.996284	0.850746	0.934612	1.15624	1.44403	1.55254
0.787919	0.812266	0.871448	0.749228	0.607957	0.582806	0.636963	0.614829	0.704071	0.664907	0.618984	0.660466	0.686393	0.646467	0.702239	0.786826	0.721402	0.78073	0.790766	0.985857	0.884555	0.800807	0.990947	1.07598								1.513	1.45117	1.11901	1.18727	1.20598	1.06126	1.07493	1.06522	1.06693	1.06568	1.23312	1.238	1.43666	1.46185	1.51954	1.54839	1.46259	1.46161	1.46806
0.844802	0.851209	0.829656											0.99663	1.04898		1.25737					1.31889		1.19769	1.11133	1.08216	0.971851	0.996927	0.985838	0.969459	0.935606	0.97217	0.889787	0.812956	0.836426	0.834306	0.790864	0.768746	0.788445	0.804053	0.855479	0.833049	0.802982	0.82112	0.790088	0.829015	0.937126	0.940858	0.967682	1.04637
1.42734	1.26913	1.12585	1.05534	1.11052	1.10429	1.2058	1.11895	1.10625	1.11937	0.986302	0.953178	0.947457	0.85483	0.825488	0.729879	0.715468	0.736179	0.79495	0.767715	0.733378	0.784595	0.835185	0.776337	0.855819	0.86392	0.846986	0.921355	0.871089	0.869377	1.03788	1.16893	1.08884	1.08274	1.08581	0.913933	0.825398	0.363946	0.405782	0.483375	0.456628	0.477725	0.443339	0.407503	0.395635	0.367749	0.36162	0.402478	0.467574	0.442134
0.367769	0.314211	0.364534	0.263171	0.319313	0.38462	0.436505	0.522401	0.655187	0.700258	0.750665		0.787356	0.786765	0.79652	0.835756	0.726821	0.700918		0.682432	0.640639	0.735815	0.837962	0.790845	0.841731	0.784377	0.845029	0.785982	0.760523	0.765247	0.756312	0.721613	0.698173	0.713374	0.73004	0.736905	0.748463	0.684158	0.728078	0.713665	0.677762	0.713204	0.684558	0.674987	0.681998		0.637313			0.691022
0.411845	0.382988	0.374343	0.36379	0.339066	0.38639	0.34614	0.447225	0.65572	0.548018		0.649022	0.628861	0.661818	0.555903	0.462648	0.448412	0.523537	0.520883	0.925287	1.19524	1.05685	1.04651	1.11513			0.810659	0.872946	0.870268	0.971628	0.910095	0.996989	1.01831		1.21133	1.1186	1.10895		1.05739		1.01456	0.982259	0.988404	0.846888	0.869948	0.861455	0.762524	0.675836
1.16964	1.60777	1.80365	1.89322	1.61591	2.35549	2.47714	2.15837	2.97135	2.62877	2.96798	3.75215	3.82355	3.77714	2.86869	4.02923	2.59587	1.64994	1.46204	1.75657	1.90552	1.71884	1.25338	1.50843	1.03277	1.28866	0.863396	1.02822	1.05368	0.971455	1.29069	1.34725	1.33327	1.28175	1.33238	1.42246	1.38663	1.24521	1.19193	1.29631	1.2057	1.28452	1.29628	1.37654	1.23319	1.18671	1.27219	1.27186	1.1343	1.14121
0.79228	0.865397	1.21067	0.759589	0.64539	0.664013	0.799347	0.93612	1.08506	1.00574	1.26882	0.920959	0.754732	1.02108	0.679373	0.586862	0.540259	0.598128	0.533806	0.536196	0.498621	0.53139	0.549046	0.485471	0.541305	0.581924	0.61972	0.669506	0.662179	0.606582	0.65531	0.764758	0.645141	0.717931	0.739458	0.75881	0.764891	0.742309	0.864307	0.902016	0.820245	0.778399	0.760278	0.778809	0.584374	0.54603	0.589144	0.555493	0.553085	0.542129
1.15374	1.82842	3.07085	1.78206	1.55547	0.766577	0.835855	0.973238	1.15478	1.43371	1.46609	2.00399	2.91086	3.66483	3.61765	3.38875	2.71347	2.63431	2.17261	1.88554	2.14807	3.26865	4.36315	4.12597	5.02914	3.87955	4.07313	2.83027	2.14335	1.80734	2.0533	1.51111	1.3256	1.51884	1.40497	1.41148	1.74357	1.41597	1.56475	1.8065	2.06232	2.24064	2.1802	2.11951	2.41497	2.12779	2.70599	2.53351	2.49442	2.22457
4.63358	5.13805	1.98292	1.5095	1.79472	1.8058	1.45681	1.51549	1.5261	1.4209	1.15796	0.812158	1.1705	1.23272	1.16311	1.31954	1.43262	1.30532		1.81856	1.77447	1.69447	1.56238	2.05982	1.73483	1.93149	2.0777	1.80407	2.26783	1.76077	2.17651	1.99849	1.90921	1.68557	2.8738	4.12028	4.67686	4.09335	4.3872	4.50456	3.62306	3.25241	3.33602	2.96449	3.88259	3.25242	5.18315	0.975243	3.71269	0.970334
0.307205	0.249129	0.271278	0.281305	0.287655	0.333566	0.372937	0.374179	0.397375	0.445917	0.453607	0.513475	0.571662	0.603334	0.774377	0.838602		1.07382		1.20765	1.16065	1.24354	1.26866	1.35937	1.42222	1.34189	1.60742	1.58957	1.61754		1.47446	1.60535	1.56315	1.36852			1.54997		1.60897	1.5187	1.37773	1.29366	1.10804	1.01053	0.971321	0.925368	0.851363	0.875988	0.855415	0.95566
0.923367	0.927348	0.990575	0.970361	0.947845	0.929567	0.935919	0.94219	0.88531	0.846097	0.895254	0.903358	0.917148	0.943348	0.835382	0.952293	0.908402	0.913411		0.998973	1.00687	1.03198	1.00871	0.962387	1.01226	0.997568	1.02014	0.921027	1.03439	1.06338	1.12546	1.14496	1.17697	1.11947	1.16267	1.25725	1.30109	1.24594	1.22221	1.19081	1.19779	1.16571	1.15466	1.10413	1.08424	1.02986	0.999213	1.06007	1.07672	1.09836
1.21481	1.28448	1.37957	1.42115	1.44601	1.36892	1.44308	1.40567	1.41673	1.4673	1.33356	1.28563	1.21789	1.2284	1.28318	1.34581	1.37238	1.43526	1.57888	1.7469	1.96097	2.13689	2.20246	2.32513	2.16724	1.99262	1.84876	1.69332	1.74239	1.42996	1.47167	1.38258	1.49137	1.51579	1.43741	1.40528	1.39038	1.32197	1.32708	1.29238	1.2506	1.21266	1.15921	1.16414	1.19393	1.1682	1.16875	1.19827	1.10722	1.06484
0.744245	0.751921	0.74754	0.728712	0.636227	0.514786	0.488227	0.497243	0.651084	0.571523	0.528588	0.416553	0.369427	0.390438	0.42882	0.510027	0.410168	0.327888	0.265016	0.284254	0.526002	0.954088	1.65349	1.75675	2.77939	2.58601	4.54624	3.46658	4.07895	3.3598	3.37602	3.28508	1.858	1.0702								1.77107	1.90398	1.98848			3.03196	2.47566	2.49705	1.21966
0.641229	0.614336	0.574965	0.617553	0.632609	0.62378	0.669149	0.765163	0.869737	0.865505	0.90393	0.864782	0.914372	0.884899	0.823459	0.782723	0.734324	0.725372	0.726322	0.773481	0.690867		0.677173	0.707549	0.660799	0.626022		0.713768	0.569632	0.574676	0.540443					0.536262	0.85386	0.910538	0.867263	0.843122	0.904319	0.943752	0.929119	0.964851	0.852447	0.936894
0.636571	0.636001	0.603852	0.573508	0.613706	0.67402	0.674072	0.671444	0.725179	0.800178	0.776952	0.806768	0.930598	0.89724	0.844074	0.888957	0.834757	0.8139	0.860344	0.767803	0.779086	0.81612	0.800884	0.751188	0.822465	0.777255	0.767344	0.782931	0.762665	0.851066	0.833829	0.820224	0.910078	0.981849	1.00231	1.10812	1.18723	1.17128	1.28684	1.32405	1.30098	1.32671	1.38312	1.40503	1.34324	1.32052	1.28752	1.14422	1.0946	0.97923
0.718041	0.854033	0.746042	0.839655	0.693508	0.552932	0.416066	0.510465	0.337498	0.714484	1.46704	1.42941	1.69075	1.70849	1.68408	1.33896	1.12317	1.34857	1.45157	1.49636	1.32268	1.53901	1.62542	1.39204	1.26146	1.40094	1.56539	1.65291	2.01353	2.26544	2.73375	2.56653	6.06141	3.82757	5.71002	4.97003	1.7328	5.62333	4.4997	4.62614	3.61073	3.14782	2.09248	2.20489	1.85843	1.85	1.55121	1.51198	1.63707	1.31762
0.695302	0.811169	0.78087	0.848928	0.949154	0.921129	0.943348	1.01462	1.00519	1.04922	1.02125	0.961707	0.887653	0.829438	0.804452	0.869497	0.829477	0.79685	0.852386	0.857324	0.874073	0.897624	1.0238	1.20222	1.27412	1.28837	1.20744	1.25957	1.2482	1.22592	1.31818	1.35675	1.31829	1.47889	1.78925	1.80575	1.88493	1.73193	1.72719	1.79531	1.72923	1.54872	1.28719	1.08276	0.987022	0.932011	0.877988	0.896476	0.943733	0.970108
0.496015	0.523029	0.503381	0.561597	0.564579	0.611499	0.646683	0.754489	0.724503	0.769959	0.75856	0.784037	0.808273	0.971603	1.07818	1.16323	1.20273	1.21947		3.14954	1.54216	1.27844	1.27463	1.26631		1.13632	1.1575	1.10901	1.10321	0.986719	0.885849	0.937888	1.04053	1.09178	1.05435	1.05926	1.02031	1.01825	1.08039	1.17942	1.16897	1.07567	1.06133	1.07335	1.07146	1.11237	1.0049	1.01168	0.993406	0.832016
0.964628	1.18946	1.57383	1.22968	1.46641	1.2482	1.26288	1.33673	1.35995	1.38801		1.16602	1.16426	1.24674	1.08823	1.21963	1.14692	1.27987			1.08545	1.08901	0.950652		0.965614	0.916548	0.902611	0.963149	1.05971	1.07946	1.14224	0.924611	0.854136	0.987698	1.12645	1.01973	1.05131	0.989739	0.941366	0.80546	0.782211	0.767946	0.763202	0.749395	0.649763	0.659579	0.711889	0.644505	0.59388	0.648064
0.914431		0.484092	0.545643	0.890238	1.00111	1.16759	1.40421	1.12871	1.0909	1.11697	0.925899	0.938237	1.00999	1.04825	1.20689	1.21051	1.20746	1.17333		1.01459	1.1413	1.08178	1.08258	1.15455	1.28188	1.2433	1.14213	1.18564	1.22224	1.22622	1.22395	1.26522	1.13615	1.15768	1.21577	1.36162	1.21842	1.20157	1.25606	1.30312	1.16881	1.41314	1.40462	1.32674	1.28191	1.25153	1.2318	1.22013	1.12229
0.499227	0.442401	0.466227	0.477604	0.456658	0.469492	0.522718	0.544631	0.542556	0.574707	0.551192	0.581065		0.622511	0.618474	0.670336	0.670427	0.723424		0.784602		0.906328	0.896171	0.929506	1.04558	1.08728	1.12733	1.29811	1.572	1.51667	0.737138	0.760337	0.684633	1.14488		1.0509	1.24878	1.53738	1.6327	1.57157	1.45641	1.14836	0.993431	0.866332	0.719631	0.72803	0.683505	0.706496	0.810819	0.820987
0.451132	0.429644	0.499452	0.469465	0.520576	0.562256	0.497938	0.527008	0.57031	0.535348	0.595309	0.68276	0.744261	0.704614	0.746744	0.720091	0.692707	0.614777	0.625203	0.655444	0.612284	0.643467	0.646043	0.695177	0.740473	0.744269	0.773665	0.763855	0.780615	0.766676	0.801456	0.837277	0.87011	0.875291	0.914175	0.878768	0.909632	0.963946	0.916434	0.915719	0.906641	0.927587				1.05225	1.00571	1.03124	1.01396	1.00263
0.363284	0.317429	0.282894	0.254312	0.279921	0.278929	0.275518	0.341554	0.349161	0.381609	0.417291	0.430225	0.40941	0.442013	0.579785	0.470644	0.464153			0.480607	0.534963	0.525947	0.528141	0.52502	0.485038	0.534717	0.506618	0.547948	0.559083	0.606902	0.621882	0.677305	0.690039	0.703604	0.762996	0.799089	0.798972	0.873028		1.07823	1.12456	0.744684	0.777277	0.687091	0.684477	0.945043	0.690797	0.604959	0.698473	0.75721
0.411348	0.432146	0.451034	0.444027	0.428406	0.410004	0.402413	0.349645	0.350177	0.35112	0.347704	0.338837	0.371331	0.381092	0.394879		0.390919		0.399749	0.385242	0.40755	0.440845	0.430662	0.462411	0.481673	0.487266	0.457241	0.455027	0.450154	0.466826	0.437423	0.395011	0.360502	0.350527	0.336847	0.309804	0.325515	0.341405	0.340699	0.293934	0.308327	0.319163	0.314414	0.286693	0.261984	0.260401	0.26472	0.263525	0.241003	0.23293
0.526989	0.51875	0.541947	0.541052	0.406439	0.4886	0.564509	0.618832	0.823434	0.859626	0.954111	1.00948	1.06339	1.15143	1.0788	1.17322	1.11449	1.11578	0.963265	1.01874	1.09382	1.13605	1.14136	1.17141	1.14434	1.1172	1.10787	1.12404	1.20862	1.22695	1.18646	1.08066	1.01473	0.982272	0.938338	0.913339	0.854919	0.782496	0.758669	0.669892	0.676811	0.641498	0.633845	0.624073	0.726728	0.749273	0.73421	0.76482	0.742633	0.719845
1.22972	1.42728	0.759656	1.25505	1.16397	1.09891	1.0115	0.924995	0.903213	0.931957	0.997261	1.03207	1.04809	1.02819	1.04182	1.04071	0.973942	1.02315	1.01134	1.09252	1.15122	1.25482	1.41044	1.49573	1.60346	1.65399	1.55593	1.51446	1.39462	1.27898	1.22317	1.12533	1.06516	1.01101	1.00035	0.903224	0.848762	0.791683	0.75771	0.735637	0.756017	0.731916	0.682094	0.618196	0.599411	0.585114	0.586023	0.592287	0.591926	0.576823
0.32718	0.465488	0.60897	0.731523	0.836593	0.77978	0.792647	0.596719	0.536243	0.66152	0.413229	0.661843	0.243438	0.374483	0.340238	0.381093	0.433559	0.533598	0.598331	0.540808	0.493832	0.527157	0.467774	0.348253	0.370325	0.26686	0.307363	0.337924	0.33231	0.386255	0.444329	0.445105	0.447061	0.379923	0.426872	0.427746	0.429549	0.448301	0.475414	0.577496	0.473323	0.502361	0.559495	0.440785	0.555601	0.564205	0.519373	0.561072	0.544298	0.503029
0.382074	0.379171	0.371256	0.403952	0.475556	0.459175	0.463261	0.483358	0.481194	0.468281	0.598078	0.612239	0.656853	0.707812	0.728807	0.703366	0.750181	0.941533	0.82532	0.922659	0.889781	1.07074	1.20092	1.23927	1.2557	1.23375	1.33155	1.54149	1.24886	1.19076	1.22933				1.01822	1.05951	1.07968					0.804976	0.513878	0.716427	0.442502		0.330799	0.429575
1.20754	2.11547	1.39081	1.74919	1.12771	1.03973	0.881067	0.733713	1.01895		1.35935	1.16692	1.05714	1.10276	1.00952						1.35424		1.04404	1.05208	1.16111	1.21756	1.25026	1.58773	2.50264	1.56309	1.77992	1.49849	1.80201	1.77961			1.93908	1.33064				1.7475	1.51312	1.01331	1.15271		0.922199	0.874667	0.583125	2.38278
0.423686	0.450012	0.393116	0.237871	0.362361	0.42768	0.515018	0.620537	0.646334	0.759515	0.845459	0.874493	0.859742	0.821608	0.825311	0.770962	0.79288	0.793682	0.743697	0.7505	1.04472	1.04684	0.964439	0.807603	0.527413	0.453954	0.421589	0.483685	0.521776	0.497998	0.548189	0.5393	0.571379	0.635079	0.602517	0.608291	0.584439	0.56814	0.507017	0.528658	0.446489	0.473982	0.467783	0.414793	0.431968	0.440296	0.451281	0.397149	0.366035	0.388036
1.28996	1.52455	1.20934	1.32929	0.947872	0.900694	0.877613	0.907555	0.980416	0.833909	0.821772	0.829288	0.914887	1.1246	0.971464	1.00488	1.09254	0.937884	1.09265	1.03259	0.965286	1.12707	1.0031	1.25118	1.12933	1.16648	1.11015	1.39672	1.32351	1.21613	1.33915	1.46955	1.45642	1.43293	1.34017	1.24216		1.20492	1.06643	1.00478	0.928341	0.723956		0.681691	0.642909	0.621836	0.587621	0.624081	0.532507	0.642107
0.735486	0.750712	0.724097	0.69951	0.645926	0.650643	0.695264	0.768914	0.800914	0.915861	0.971117	0.971747	1.00456	1.09275	1.10881	1.08059	1.06651		0.863553	0.846959	0.812578	0.798228	0.73898	0.724002	0.709504	0.694355	0.747478	0.701794	0.697556	0.709855	0.694287	0.740002	0.736046	0.734671	0.771245	0.757015	0.755179	0.67167		0.654602		0.63352	0.620146	0.620974	0.590638	0.59037	0.66049	0.698833		0.679959
0.800545	0.759294	0.745476	0.700498	0.684623	0.664434	0.655869	0.676344	0.697136	0.861845	0.970831	1.06124	0.987891	1.00525	1.02614	1.04743	0.991196		0.944839	0.927618	0.926157	0.910483	0.847282	0.869654	0.846269	0.903147	0.885369	0.776889	0.815172	0.812554	0.800936	0.797261	0.775841	0.76084	0.778558	0.73344	0.690673	0.688904	0.56732		0.714187	0.593742	0.594448	0.62509		0.637614	0.64983		0.53893
0.62873	0.598714	0.584491	0.612354	0.679915	0.724366	0.761807		0.731287	0.782231	0.806294	0.814205	0.865688	0.897473	0.909073	0.951477	0.935475	0.985312	0.93627	0.888263	0.859085	0.806384	0.73823	0.671387	0.642215	0.606049	0.597287	0.617224	0.648858		0.604822	0.695379	0.809631	0.784143	0.773907	0.713938	0.756843	0.713531	0.753384	0.799563	0.803205	0.80636	0.718208	0.703865	0.713076	0.724519	0.7348	0.697747	0.635919	0.634527
0.667167	0.676935	0.630584			0.850143		1.41357	1.03552	0.501646	0.460793	0.442147	0.472829	0.535729	0.449039	0.593475	0.615925	0.720333	0.660427	0.585615	0.549732	0.587382	0.551859	0.57772	0.66661	0.554639	0.605741	0.413091	0.379524	0.388441	0.414642	0.42963	0.400261	0.398672	0.413001	0.434375			0.955842	0.877135	0.847286	0.966668	0.895497	0.949469	0.855498	0.817655	0.92025	0.900008	0.953462	0.921917
0.375797	0.381721	0.383581	0.479771	0.430449	0.363779	0.439415	0.330798	0.365519	0.406206	0.520911							0.966442	0.945498	1.02577	1.076	1.20141	1.20489	1.00438			1.07218	0.882119	0.972968	0.91483	0.959943	0.948636		1.15876	1.00521	1.04546	0.789374	0.53314	0.479513	0.523663		0.529162	0.522562	0.514675	0.530785	0.51735		0.46311	0.459319
0.682375	0.765346	0.682093	0.66239		0.666462	0.631923	0.550414	0.542151	0.565775	0.579384	0.624729	0.624576	0.692804	0.689939		0.658736	0.676403		0.806057			0.745963	0.822865	0.809639	0.78391	0.851731	0.866839	0.93111	0.993094	1.07829	1.23855	1.29042	1.11834	1.10501	1.24933		1.40756	1.22043	1.3101	1.26218	1.25765							0.870147	0.843052
0.607068	0.679444	0.810062	0.854298	0.880353	0.940464	0.891522	0.912191	0.89265	0.816875	0.8261	0.798531	0.792947	0.705372	0.63135	0.714343	0.735471	0.81285	0.827328	0.764098	0.821959	0.703506	0.738375	0.763802	0.830923	0.859008	0.811527	0.775229	0.765957	0.771738	0.768518	0.964547	1.35475	1.54991	0.697976	0.648194	0.77637	0.725878	1.18259	0.445118	0.717547	0.895043	1.10864	1.20777	1.26765	1.17179	1.01878	0.931649	0.866659	0.753412
0.867861	0.968583	1.0286	1.10677	1.05982	1.29526	1.50493	1.65749	1.82817	1.75104	1.62879	1.45471	1.36094	1.15057	1.25458	1.32423	1.30008	1.26625	1.46281	1.58445		1.74188		1.88296	1.98395	1.98703	1.82231	1.70747	1.63214	1.32202	1.25718	1.13858	1.16478	1.174	1.22374	1.23019	1.18309	1.2109	1.16886	1.10605	1.07266	0.979382	0.975205	0.925987	0.870279	0.871578	0.890543	0.867716	0.822257	0.815963
1.23782	1.05446	0.963478	0.865209	0.692397	0.485649	0.509024		0.412836	0.412809	0.366798	0.38999	0.408582	0.413017	0.397707	0.382623	0.427784	0.473625	0.418854	0.44661	0.421441	0.490116	0.620292	0.578412		0.837902	0.808828	0.863652	1.02651				0.681077	0.629991	0.681466	0.658481	0.68398	0.681862			0.622035			0.474488			0.619161	0.62298	0.658782
1.29088	1.25803	1.33199	1.23163	1.11398	1.11464	1.03828	1.01432	0.944354	0.933164	0.926087	0.976463	1.05066	1.13162	1.39279	1.60158	1.58531	1.62446	1.62436	1.6467	1.68861	1.59547	1.46872	1.33617	1.22383	1.10941	1.04953	0.959918	0.944706	0.907544	0.823197	0.785518	0.738013	0.739528	0.790939	0.785455	0.843523	0.871284	0.899014	0.930284	0.88972	0.843616	0.752882	0.752323	0.648126	0.630172	0.665272	0.660011	0.66655	0.709496
0.691734	0.929708	1.14629	1.27168	1.67562	2.24603	2.45744	0.656712	0.904752	0.581388	0.176671	1.11076	1.21623	1.46317	1.7773	2.03257	2.15972	2.37104	2.29414	2.10954	1.90518	1.76419	1.5916	1.54439	1.37955	1.28651	1.17184	1.06798	1.09386	1.20947	1.18959	1.24627	1.19588	1.08499	1.20778	1.13102	1.08914	1.14932	1.28273	1.30203	1.61486	1.76222	2.06587	2.03314	1.97287	2.0358	2.15262	2.38654	2.34466	2.25052
0.985631	1.02905	1.00164	1.05967	1.02358	1.08851	1.1559	1.17453	1.0525	1.24342	1.07086	1.10373	1.11556	0.983597	1.04861		1.01278	1.04766	1.05855	1.15344	1.08845	1.15284	1.13242	1.13322	1.21654	1.21771	1.36647	1.40481	1.41669	1.35846	1.24336	1.17292	1.10209	1.0971	1.15759	1.17817	1.26077		1.17357	1.19351	1.17488	1.12272	0.945883	0.857732	0.851805	0.853314	0.943173	0.961013	0.964369	0.978376
0.636601	0.569161	0.627221	0.641553	0.657706	0.723076				0.775966	0.827455					0.912837	0.900098	0.90108	0.918509	0.958192	0.888743	0.931228	0.949017	0.92884	0.929894	0.887813		0.951692		0.993895	1.03926	0.983159		0.866173		0.77682	0.761909	0.76126		0.760452	0.638409	0.5814	0.651199	0.677744	0.672195	0.796503	0.825644	0.825308	0.815829	0.830579
1.12162	1.23132	1.3893	1.17261	1.30979	1.26437	1.49295	1.49254	1.16861	1.36954	1.3393	1.32502	1.35698	1.37338	1.30889	1.43152	1.40949	1.51517	1.5058	1.39747	1.43203	1.39709			1.18757	1.10036	1.05535	1.04958	0.954035	0.896145	0.896489	0.855717		0.816419		0.793388	0.840135	0.846659	0.795402			0.739679	0.720134	0.678844		0.559269	0.528582	0.533855	0.491567	0.509643
0.822769	0.913829	0.903802	0.845723	0.872389	0.824851	0.824437	0.89047	0.875816	0.972265	0.934866	1.09829	1.04559	1.07861	1.09632				1.28119	1.32955	1.44024	1.45876	1.44684	1.35897	1.34647	1.1524		0.661757	0.657095	0.666357	0.695285	0.74183	0.741901	0.796832	0.777484	0.792321	0.779595	0.809493		0.823284		0.79965	0.819191	0.845938	0.859704	0.88189	0.95766		0.882491	1.02703
0.81086	0.783882	0.909468	0.784423	0.868233	0.967267	1.04792	1.5507	0.660003	0.577943	0.707566	0.489364	0.433262	0.843868										0.893644	0.883278	0.904412	0.909288	0.914647	0.971711	0.973159	0.955582	0.872118	0.854945	0.903047	1.0406	1.01381	1.01105	1.04462	1.31526	1.46619	1.49388	1.35158	1.4726	1.61521	1.29226	1.25054	1.01612	0.773893	0.710928	0.705726
1.37959								0.427733	0.381793	0.402382	0.383475	0.348728	0.33306	0.28275	0.281293	0.257469	0.273863	0.301491	0.246099	0.234039	0.287821	0.270992	0.291155	0.253103	0.274202	0.248475	0.272908	0.289969	0.280439	0.275253	0.295923	0.301746	0.316778	0.289616	0.280362	0.301611	0.322836	0.315905	0.349407	0.335488	0.350745	0.316463	0.308275	0.32772	0.367936	0.380373	0.420452	0.411717	0.394438
0.824786	0.9175	0.911136	0.996165	1.02813	1.07237	0.952109	0.974056	0.856855	0.808657	0.712852	0.664386	0.647433	0.60576	0.607937	0.655649	0.664733	0.725657	0.749436	0.841597	0.848615	0.930075	0.952555	0.951041	1.01598	1.04126	1.08631	1.08648	1.13268	1.10704	1.12113	1.2463	1.43084	1.46403	1.52875	1.56042	1.53479	1.43424	1.35674	1.33688	1.30517	1.23495	1.18439	1.14637	1.10628	1.05684	1.03527	1.01814	1.14318	1.08464
0.941667	0.969046	0.957999	1.0661	1.10689	1.27983	1.29548	1.44788	1.51518	1.43217	1.47033	1.47441	1.35901	1.40122	1.36395	1.39842	1.35363	1.40209	1.39611	1.55621	1.4894	1.64053	1.50081	1.52924	1.42896	1.32859	1.38565	1.33759	1.35072	1.35403	1.29102	1.25527	1.27446	1.35163	1.33137	1.31499	1.17341	1.1786	1.21647	1.34487	1.29294	1.28883	1.28845	1.18791	1.18403		1.11278	1.11257		0.994456
1.37892	1.17998	0.989762	1.0699	1.19456	1.193	1.09927	0.894363	1.28288	0.934207	0.787672	0.860697	0.760804	0.637465	0.781757	0.736903	0.718299	0.799214	0.717966	0.669802	0.831469	0.87724	1.15285	1.19328	1.25546	1.05743	0.798994	0.815779	0.869808	0.84882	0.847563	0.937028	0.986315	1.03333	1.10117	1.16424	1.19229	1.21159	1.26055	1.19699	1.45998		1.3553						1.19945	1.07267
0.783742	0.611082	0.562815	0.569515	0.855508	0.990379	1.03366	0.682741	0.597898	0.543849	0.570162	0.576766	0.63883	0.598953	0.68203	0.69975	0.717251	0.716525		0.878101	0.867247	0.946361	0.940767	1.01499	1.07918	1.09917	1.20039	0.75759	0.811797	0.852183	0.878332	1.2022	1.22685	1.22529	1.14857	1.14541	1.17309	0.91603	0.9258	0.871056	0.844478	0.798937	0.738762	0.608171	0.569935	0.574698	0.573812	0.667685	0.562496	0.714386
0.76381	0.931707	0.949733	1.23007	1.083	1.07836	1.0215	0.851684	0.66682	0.613557	0.584946	0.507084	0.399469	0.485475	0.495761	0.480348	0.554108	0.651928	0.660699	0.648833	0.772426	0.676955	0.749236	0.778669	0.763179	0.714718	0.70564	0.752143	0.796009	0.83471	0.780038	0.722463	0.780362	0.740846	0.760124	0.78976	0.778636	0.807194	0.832808	0.829951	0.83478	0.852341	0.853743	0.827562	0.80336	0.771517	0.848037	0.853405	0.902553	0.851293
0.90059	0.887791	0.927898	0.999863	1.02151	1.08452	1.29058	1.22276	1.11261	1.05441	1.00792	0.934651	0.871731	0.84819	0.800868	0.785897	0.795262	0.846491	0.822579	0.828758	0.817141	0.922736	0.856879	0.843098	0.878766	0.930804	0.957375	0.995345	1.06117	1.03778	1.11247		1.13016	1.11759	1.10511	1.12478	1.03609	0.985816	1.11991	1.13327	1.25748	1.32005			1.13274		1.02332	1.07794	1.00113	0.946008
1.04109	1.26531	1.38144	1.63678	1.56081	1.44011	1.37652	1.425	1.48847	1.49535	1.49147	1.41901	1.58382	1.52417	1.50062	1.30987	1.22819	1.12023	1.00998	1.03489	0.972231	0.842053	0.837806	0.907357	0.849915	0.78155			0.822073	0.839735	0.888397	0.926323	0.988476	0.935772	1.19412	1.2027	1.26713	1.1162	1.11222	0.868638	0.932271		0.866393	0.677491	0.796966	0.794094	0.89034	0.84972	0.838465	0.843681
0.660714	0.790727	0.627871	0.622623	0.727468	0.810682	0.7284	0.783802	0.850154	0.810032	0.820463	0.885601	0.918659	0.948306	0.928624	0.947356	1.2499							1.12593	0.997785	0.937444	0.882422	0.815599	0.795358	0.729107	0.748469	0.746589	0.694518	0.724678	0.695754	0.755849	0.765552	0.784684	0.73611	0.709962	0.769925	0.760131	0.714737	0.88289	0.74794	0.764428	0.588852	0.57458	0.583109	0.596368
0.719427	0.677793	0.762634	0.756529	0.76613	0.719574	0.747348	0.78128	0.91502	1.04778	1.17511	1.15198	1.14486	1.21777	1.16223	1.10173	1.03483	1.08558		1.23531	1.22288	1.24339	1.16038	1.14477	1.24706	1.23464			1.01533	0.997699	0.994237	0.986279	0.969912	0.987239	0.993037	0.980435	0.927595	0.938294	0.978545	0.91516	0.942139	1.01109	1.02255	1.02708	0.910141	0.915324	0.870207	0.833752	0.87447	0.817317
1.07702	0.953914	0.905626	0.901868	0.936159	0.936639	0.969349	1.03649	1.09794	1.21724	1.31808	1.45549	1.50844	1.69849	1.74916			1.51844	1.43278	1.17201	1.0168	0.92527	0.862112	0.730535	0.636828	0.623995	0.630273	0.672663	0.669311		0.748155	0.7434	0.758398	0.763853	0.735014	0.770265	0.817998	0.849291	0.899819	0.776917	0.794623	0.862395	0.844714	0.850514	0.800572	0.702866	0.6353	0.559339	0.515557	0.429961
0.617711	0.657323	0.645674	0.638713	0.65433	0.662127	0.677074	0.746749	0.789967	0.822344	0.818536	0.873136	0.903546	0.877142	0.908687		1.00792	0.970296	0.966422	0.917797	0.814262	0.865043	0.81855	0.80653	0.889147	0.910891	0.930571	1.03192	1.02928	1.09299	1.04676	0.997238	1.02341	0.911478	0.82096	0.707588	0.722583	0.695396	0.771497	0.78527	0.800664	0.802947	0.819817	1.00876	1.12647	1.18253	1.88228		0.508152
0.945547	1.12985	1.005	1.46678	1.38632	1.18161	1.04956	0.594779	0.731164	0.78044	0.819544	0.807499	0.756299	0.975445						1.28337	1.08516			0.799662				1.25867		1.54513	1.62356	2.0243	1.75348	1.5411	1.47765	1.42062	1.6325	1.14091	1.17433	1.58776	1.22806	1.09795	1.0303	0.928104	1.1668	0.960294	1.21695	1.05212	0.962781	0.992998
0.844838	0.885812	0.951063	0.911344	0.961204	0.9062	0.906133	0.904027	0.85389	0.831133	0.748058	0.796297		1.02978	0.975619		1.11852				1.12376	1.19105	1.15113	1.09901	1.14599	1.1643	1.06678	1.25158	1.20606	1.17253	1.23467	1.19602	1.21613	1.14728	1.17096	1.20897	1.2183	1.13736	1.14082	1.06069	0.909613	0.856122	0.81535	0.810447	0.814581	0.745977	0.720538	0.776042	0.737406	0.704023
0.450092		0.425973	0.429338	0.435565	0.471832	0.463135		0.485035			0.643631	0.59486	0.608801	0.654339		0.719242	0.722047				0.783689	0.766334	0.839694	0.733691	0.748863	0.776611	0.739126		0.733682	0.772842	0.774184	0.839389	0.976055	1.07816	1.22262	1.337	1.29864	1.17307	1.23056	1.14923	0.889319	0.791436	0.59301	0.593825	0.683867	0.742641	0.683625	0.67172	0.696841
0.441459	0.616199	0.982716	1.01229	0.551055	0.492089							0.645183	0.87032	0.695454	0.837659	0.930946	0.782419	1.00099	0.741868	0.818909	1.11903	0.729919	0.784942	0.746245	0.913383	1.06288	0.8056	0.974688	0.921774	0.691515	1.00674	0.769362	0.994322	0.934556	1.08632	1.05166	0.972104	1.18856	1.1302	1.10883	1.10949	1.05053	1.07789	1.06134	0.959024	1.01209	0.907103	0.803516	0.752624
0.609452	0.655258	0.696482	0.715082	0.751872	0.849666	0.930523	1.0228	0.913012	0.937926	0.827146	0.830881	0.7875	0.727952	0.808018	0.758722	0.830021	0.79151	0.811755	0.793892	0.838846	0.885967	0.845246	0.855577	0.872438	0.877322	0.837191	0.910425	0.909338	0.950633	0.943337	0.973701	0.955528	0.943614	0.997403	0.929679	0.931772	0.918875	0.850769	0.795281	0.756235	0.653011	0.617103	0.599827	0.544738	0.564076	0.513209	0.494144	0.511166	0.543436
0.887578	0.971456	1.03632	0.973355	0.973982	0.886479	0.922642	0.809586	0.751934	0.695583	0.658102	0.583771	0.524093	0.499587	0.467269	0.552929	0.560626		0.56331	0.63919				0.601908		0.588898	0.658911	0.674175	0.671834	0.589166	0.552711	0.482437	0.537317	0.557796	0.544834	0.561162	0.555114	0.60309	0.56974	0.605024	0.608146	0.553313	0.56688	0.575422	0.568492	0.578277	0.637727	0.608683	0.700245	0.636643
0.545757	0.545408	0.510551	0.455975	0.407396	0.40576	0.516492	0.498789	0.572506	0.747766	1.01643	0.327974	0.447195		1.18647	0.428009	0.475163	0.607161	0.765457	0.796131	0.788934	0.751372	0.729865	0.716713	0.753906	0.66058	0.653124	0.657363	0.856902	0.664307	0.672996	0.740114	0.805239	1.09039	1.16711	1.06916	0.923271	1.09841	1.08212	0.934785	1.01919	0.821112				0.846619		0.816644	0.89835	0.853513
0.273915	0.30455	0.325604	0.33468	0.376563	0.391517	0.431461	0.419679	0.433356	0.448837	0.475839	0.432323	0.545376		0.456982	0.447539						0.492713	0.445865	0.448872	0.444679	0.457552	0.525117	0.504121	0.53557	0.548007	0.526403	0.506024	0.539342	0.552598	0.559804	0.523574	0.532632	0.534577	0.506152	0.492101	0.420257		0.41872	0.44193	0.475288	0.461271	0.507961	0.48367	0.499701	0.535827
1.03688	1.08749	1.03663	1.01458	0.963553	0.959999	0.970545		0.973683		1.08334	1.12519						1.02176				1.32058	1.23657	1.1385	1.10262	1.26311	1.21703	1.16627	1.14666	1.20004	1.24156	1.21868	1.20561	1.22523	1.3043	1.28711	1.32019	1.27302	1.2652	1.2766	1.20173	1.16025	1.13823	1.13005	1.1057	1.14341	1.13534	1.15353	1.16825	1.1337
1.1284	1.16743	1.10025		1.44013	1.5339	1.60103	1.53342	1.61278	1.48293	1.31403	1.2846	1.27151	1.30982		1.33755	1.45785	1.47235		1.35624	1.35812	1.33836	1.38591	1.29157	1.29023	1.42597	1.39202	1.52524	1.64813	1.59305	1.59177	1.41057	1.6522	1.60922	1.49906	1.28491	1.30072	1.4249	1.21297	1.0935	1.15889	1.18217	0.985493	1.00461	0.920724	0.810128	0.867163	0.865352	0.851786	0.965799
0.651958	0.654152	0.765934	0.746065	0.755855	0.697186	0.736945	0.723264	0.713979	0.764204	0.781378	0.829651	0.838565	0.877353	0.783633	0.783094	0.796025	0.87211	0.925901	0.915062	0.913717	0.836648	0.735791	0.629833	0.585828	0.602456	0.596029	0.613524	0.621951	0.616438	0.636558	0.661352	0.644552	0.712742	0.765462	0.750609	0.783606	0.771578		0.72515	0.787212	0.823636	0.633746	0.496354	0.688845	0.92904	0.941394	1.05359		1.61212
1.91521	1.81303	1.8185	1.54409	1.75159	2.08465			1.44185	1.48246	1.17602	1.05416		1.18041			1.05252	1.12244				0.950974	0.987737	0.937096		0.920358	0.912033	0.923155	0.925479	0.988501	0.974836	0.927252	0.952637	1.06761	1.01508	0.965688	0.936644	0.956776	0.996532	1.05788	1.07137	1.08672	1.03684	1.01573	1.0599	1.09932	1.17495	1.15341	1.24196	1.20866
0.498736	0.529166	0.589602	0.5908	0.551804	0.536933	0.578954	0.496318	0.475649	0.475044	0.494987	0.483523		0.564256		0.850234			0.743089	0.61985	0.443712	0.473075	0.642165	0.777922	0.692943	0.692589	0.746617		0.768618	0.795752	0.811966	0.819874	0.762155	0.792844	0.735145	0.702688	0.664421	0.610739	0.601076	0.604937	0.605722	0.614615	0.528153	0.540912	0.574614	0.554876	0.565134	0.5724		0.626784
0.13584	0.170164	0.188379	0.238785	0.248823	0.341087	0.464119	0.879415	0.548621	0.627355	0.615013		0.451164	0.608687			0.662514	0.636087	0.570961	0.498824	0.448888	0.452553	0.449432	0.463836	0.431922	0.4581	0.472765	0.455324	0.473447	0.561353	0.593919	0.657801	0.654569	0.572895	0.593944	0.534467	0.614692	0.615326	0.584482	0.587023	0.545898	0.520273	0.50285	0.521994	0.497483	0.426796	0.448214	0.448182	0.410723	0.437542
0.392967	0.465206	0.499057	0.524793	0.498973	0.505834	0.573011	0.718191	0.772091	0.736959	0.711639	0.657608	0.575665	0.502605	0.500874	0.486356	0.477581	0.443654	0.508669	0.460179	0.510069	0.599014	0.56221	0.60213	0.632539	0.66704	0.657687	0.74073	0.759878	0.806247	0.865998	0.903759	0.986719	1.10485	1.10183	1.05803	0.995024	0.91016	0.88961	0.766616	0.78409	0.716944	0.652182	0.684554	0.650059	0.613335		0.60824	0.632939
	0.949098	0.912488	0.924133	0.889717	0.881415	0.784764	0.754247	0.782464	0.767378	0.762977	0.705812	0.732847	0.731153	0.819615	0.744086	0.81839	0.839108	0.91875	0.915813	0.905192	0.898153	0.876418	0.83533	0.811177	0.802511	0.780942	0.798183	0.776802	0.796196	0.750125	0.804179	0.784885	0.730359	0.841969	0.850129	0.879125	0.875169	0.855631	0.903047	0.884236	0.898156	0.834339	0.817196	0.78418	0.743536	0.699212	0.676454	0.693174	0.688545
	1.12844	1.10873	1.02305	0.972836	0.880149	0.855215	0.816458	0.727296	0.793733	0.694674	0.664585	0.660301	0.68846	0.683326	0.777445	0.768661	0.891891	1.02771	1.05158	1.05955	1.18136	1.18828	1.14429	1.10731	1.05794	1.15916	1.16574	1.15034	1.13698	1.0552	1.05214	0.913047	0.924115	0.93489	0.864948	0.864337	0.863635	0.835785	0.830667	0.879991	0.87076	0.825144	0.842939	0.854833	0.860209	0.813317	0.796803	0.774408	0.803345
	1.14274	1.17225	1.11819	1.12582	1.16859	1.24562	1.33965	1.34762	1.19746	1.18349	1.0809	1.13827	1.16055	1.14797	1.13792	1.15975	1.05334	1.13632	1.23911	1.22626	1.14478	1.14258	1.13603			1.29477	1.09663	1.11936	1.27422				1.14142	1.01668	0.824782	0.950279	0.86844	0.86279	0.948606	0.866858	0.880664	0.829924	0.790698	0.776088	0.784562	0.733774	0.805328	0.714972	0.679899
	0.306667	0.289104	0.286209	0.386613	0.388232	0.453616	0.576158	0.548114	0.637235	0.728777	0.688522	0.741151	0.759053	0.706123	0.711648	0.730035	0.615071	0.617188	0.616254	0.610624	0.570559	0.58177	0.553849	0.525475	0.516716	0.534853	0.587859	0.579577	0.542016	0.608298	0.653213	0.690232	0.727177	0.854942	0.803591	0.80868	0.888043	0.839147	0.815509	0.781407	0.780935	0.771874	0.761736	0.682166	0.723756	0.774327	0.770877	0.750532	0.730226
	0.548617	0.776853	0.517957	0.52088	0.537527	0.538529	0.595617	0.577796								0.613718		0.577917	0.674139	0.653099	0.668981	0.671894	0.677433	0.673824	0.691018	0.730706	0.752456	0.807528	0.808094	0.818693	0.871163	0.863324	0.8579	0.873072	0.885782	0.850217	0.870314	0.860078	0.837121	0.810473	0.764956	0.739441	0.696303	0.71485	0.699247	0.72646	0.70475	0.801114	0.855907
	0.139719	0.160831	0.210501	0.263843	0.276914	0.0802055	0.0801407	0.0344242	0.0461812	0.119146	0.0779658		0.101073	0.0909234	0.277782								0.18494	0.140474	0.0960738			0.10771	0.156794	0.171592	0.204547	0.168478	0.191738	0.172616	0.16325	0.12	0.112633	0.0721697	0.213141	0.213941	0.212549	0.206191	0.203787	0.189004	0.133215	0.191562	0.165851	0.147021	0.156026
	0.767683	0.793514	0.708757	0.77605	0.706019	0.717454	0.860837	0.92034	0.756462	0.848579	0.886775	0.881528	0.889361	0.90076	0.834632	1.02563						0.999748	1.12061	1.20788	1.12331	1.35121	1.08072	1.60696	1.90949	1.30523	1.20974	1.60809	1.60519				1.28524	1.0953	1.54418	2.00618	1.76438	2.15322		2.53687	2.37633	2.29717	2.28887	1.91692	1.38963
	0.9842	0.902497	1.00999	1.25818	0.843794	0.945706	1.00182	1.17434	1.15978	1.17576	1.31798	1.3942	1.33627	1.35017	1.26902	1.20314		1.42316		1.31423	1.45		1.64032		1.94763	1.51866	1.64956			1.08731		1.04719	1.12433	1.05432	1.08476	1.09951	1.09863	1.12804	1.11022		1.01406	1.06174	0.954383	1.0858	1.12767		1.21471	1.20421	1.18268
	1.03289	1.24598	1.28974	1.22518	1.31695	1.36269	1.27382	1.20801	1.13231	1.09797		1.03749				1.24295	1.45376	1.36553	1.38211	1.17791	1.15365	0.99762	0.47176	0.294049	0.477143	0.586647	0.559454			1.60386	1.30924	1.26041	1.15431		1.1937	1.21932	1.2968	1.28926	1.43512	1.42787	1.44159	1.37532	1.44851	1.4487	1.6105	1.52293	1.54895	1.61606	1.50804
	0.838651	0.782516	1.04357	0.79368	0.947954	1.02736	1.36382	1.0917	1.09582	1.08276	1.04825	1.03847	1.06378	1.17609	1.28206	1.16316	1.1706		1.3057	1.20539	1.32459	1.52305	1.55224	1.32861	1.22068	1.03919	1.01834	0.950756	1.0217	0.990024	0.898614	0.881661	1.05005	0.748963	0.750993	0.85135	0.942711	0.925049	1.05749	1.00672	1.04127	0.958188		1.10404	1.05176	1.11896	1.03143	1.06431	0.931083
	1.63105	1.70931	1.51872	1.41341	1.52312	1.47427	1.62188	1.6537	1.67012	1.62893	1.58988	1.56797	1.42429	1.38648	1.5099	1.59254	1.50313	1.45841	1.30437	1.34525	1.36053	1.35394	1.21002	1.29679	1.17939	1.25336	1.31116	1.31311	1.5273	1.56184	1.49857	1.48616	1.39584	1.43021	1.38071	2.03721	2.01789	0.869877	0.744381	0.680029	0.513078	0.941988	0.911803	1.12238	0.99135	0.805522	1.03834	0.989366
		0.632875	0.629324	0.63587	0.479944	0.495321	0.457807	0.478837	0.4568	0.453205	0.504478	0.569675	0.637998	0.594054	0.631652	0.643659	0.724838	0.685045	0.644551	0.639533	0.602826	0.63538	0.609127	0.626554	0.664722	0.68045	0.673323	0.737299	0.690922	0.706847	0.625608	0.664765	0.66248	0.685939	0.663079	0.632657	0.699496	0.63719	0.551108	0.545189	0.586006	0.566576	0.563139	0.551241	0.562307	0.546884	0.554243	0.534853	0.540063
		0.843468	0.91416	0.844889	0.849954	0.877069	0.832247	0.81391	0.812957	0.802388	0.809391	0.76717	0.738735	0.749376	0.743932	0.714835	0.710733	0.682187	0.673591	0.689368	0.700542	0.605692	0.59841	0.637215	0.67523	0.745687	0.790141	0.783017	0.765182	0.756192	0.768141	0.770601	0.822535	0.845732	0.842213	0.839218	0.821164	0.779468	0.835073	0.81011	0.779909	0.74146	0.727739	0.700326	0.682086	0.658369	0.609582	0.631224	0.6143
		0.946035	0.894242	0.78235	0.771451	0.84944	0.77573	0.720737	0.65365	0.591605	0.611559	0.620228	0.68319	0.686128	0.612212	0.7244	0.622376	0.738622		0.645947	0.701392	0.63636	0.608121	0.532004	0.523462	0.536063	0.538704	0.527867	0.549864	0.502378	0.531089	0.502603	0.594588	0.580081	0.553395	0.593603	0.572145	0.533234	0.517882	0.550469	0.513369	0.519949	0.524549	0.546058	0.598063	0.463314	0.536111	0.483022	0.458464
		0.780332	0.765132	0.793548	0.76684	0.737406	0.76319	0.719688	0.7666	0.730018	0.765668	0.818482	0.925997		0.833625	0.792972	0.815027	0.852178	0.909754	0.807386	0.863787	0.807286	0.818176	0.834362	0.758458	0.92119	0.976112	0.965898	1.04093	1.03707	1.01327	1.00776	1.04243	1.05359	1.09672	1.0338	1.07711	1.14572	1.17228	1.20348	1.13929	1.12357	1.12912	1.17345	1.15449	1.04765	1.22474	1.21454	1.18633
		0.280985	0.324863	0.392557		0.437934	0.45573	0.668292	0.469239	0.79697	0.283267	0.530522	0.680563		0.823044	0.690942	0.581791	0.747662	0.686871	0.889567	0.936208	0.795461	0.852431	0.837562	0.853185	0.843718	0.844882	0.833324	0.855149	0.871616	0.931605	1.02631	0.98176	0.886342	0.922102	0.897866	0.863681	0.782614	0.897244	0.815656	0.87064	0.874802	0.809619	0.85001	0.86221	0.862389	0.779001	0.695246	0.757227
		0.682695	0.812557	0.940326	1.05431	1.12131	1.08213	1.06512	1.03119		0.994022	0.956632	0.958233	0.932327	0.949642		0.998438			1.00298	1.00202	0.980219	0.970262	0.916684	0.932185	0.91355	0.949172	0.883787	0.8343	0.83047	0.782003	0.815641	0.832614	0.838736	0.920024	0.970632	0.977744	0.973753	0.993226	0.963386	0.951891	0.976603	0.994269	1.02981	1.03995	1.02594	1.0701	1.0655	1.05283
		0.406018	0.429192	0.353957	0.408608	0.392655	0.36087	0.381874	0.512495	0.525095	0.532083		0.553291	0.629026	0.565347		0.51783	0.550424		0.519019	0.501537	0.522819	0.509217	0.565263	0.557302	0.586998	0.553698	0.571127	0.591514	0.583026	0.552943	0.578298	0.597403	0.614112	0.650786	0.737146	0.834379	1.02146	1.7006	1.19388	0.875014	0.753417	0.643434	0.557748	0.60415	0.613233	0.670758	0.80255	0.849958
		1.00937	0.889698	0.870916	0.80687	0.777523	0.783056	0.861452	0.724882	0.722157	0.760525	0.770127	0.789141	0.812537	0.843324	0.878748	0.893327	0.804051	0.807075	0.832924	0.824306	0.885083	0.880159	0.941041	0.947539	0.897763	0.972604	1.04973	1.06786	1.1309	1.11897	0.943901	1.1028		0.900315	1.07455	1.12997	1.24789	1.16818	1.18589	1.05195	0.998916	1.06846	1.0007	1.09897	1.00168	0.953423	0.992845	1.02168
		0.987554	1.24669	1.18725	1.34884	1.36652	1.29849	1.18949	1.18667	1.1395	1.32891			1.30372	1.18515		1.58457			1.75211	1.83664	1.83817	1.69146	1.60454	1.54114	1.55427	1.47557	1.55853	1.58917	1.54426	1.55499	1.43692	1.44999	1.54405	1.70129	1.67708	1.68502	1.65306	1.5763	1.47478	1.42404	1.39521	1.31199	1.26711	1.26097	1.25411	1.27475	1.29237	1.32546
		0.836828	0.798376	0.77913	0.900104					0.330698	0.28792		0.145027	0.179634	0.200894	0.163663	0.187759	0.163888	0.232551	0.237297	0.25086	0.225788	0.469755	0.811118		0.888623		1.14114	1.12626	1.15767	1.15309	1.15193	1.21893	1.20245		1.26222					0.945758			0.880164	0.792083	0.778055	0.787595	0.774938	0.776608
		0.310748	0.323287	0.416305	0.50093	0.392617	0.448351	0.494121	0.50118	0.526358	0.526755	0.539212	0.543897	0.516299	0.602481	0.615881	0.679807	0.747785	0.810542	0.783411	0.792459	0.758106	0.785364	0.75202	0.70738	0.682406	0.759913	0.71284	0.786847	0.745792	0.748461	0.809358	0.742479	0.731338	0.744818	0.778697	0.659035	0.738042	0.702838	0.757863	0.647347	0.685992	0.611004	0.548828	0.597594	0.6443	0.573092	0.519562	0.593832
		0.903731	0.972195	1.1223	1.12112	1.13046	1.20257	1.16138	1.14201	1.14253	1.08131	0.938329	1.01494	1.01503	0.868614	1.07305	1.07422	1.03003	1.03516	1.00954	1.00005	0.907064	0.87697	0.924606	0.916855	0.931065	0.958248	0.958693	0.948651	0.981559	0.999928	1.06497	1.09992	1.10316	1.17079	1.17505	1.18239	1.333	1.30546	1.306	1.31811	1.25055	1.13338	1.04363		0.904331	0.931492		0.940979
		0.591063															0.730804	0.75238	0.829203	0.716802	0.719963	0.682591	0.648911	0.71527	0.823336	0.685283	0.598291	0.656737	0.597631	0.651867	0.597805	0.560183	0.503355	0.533963	0.516083	0.516308	0.495323	0.511567	0.420814	0.456784	0.519366	0.487558	0.455147	0.473684	0.465025	0.4226	0.450337	0.49428	0.514728
		1.08618	1.08047	1.1234	1.21813	1.37127	1.31363	1.34785	1.24075	1.14646	1.04265	1.00142	0.958842	0.90423	0.855918		0.886371			0.828026		0.865632	0.82252	0.794444	0.845221	0.887605	0.885708	0.903744	0.879199	0.919644	0.95335	0.952704	0.99277	0.942021	0.955673	0.960331	0.942137	0.907746	0.933591	0.919073	0.991945	1.0131	1.01073	1.10247	1.50475	0.754906	0.599342	0.516007	0.533201
		0.933669	0.859134	0.870917	1.03421	1.0975	1.203	1.15781	1.17264	1.34918	1.27441		1.46026					1.39202	1.33915	1.37662	1.16662	1.18874	1.19845		1.32566	1.3748	1.53127	1.63916	1.68421		1.79106	1.70864	1.75593	1.75822	1.72824	1.74884	1.75664	1.64149	1.60077	1.51007	1.39873	1.40985	1.35205	1.28023	1.35646	1.33167	1.34787	1.31903	1.34743
		1.35609	1.54065	1.93351	2.28208				1.61125	1.48465					2.2372	3.10974	2.90944	2.98993	3.04308									1.37364	1.75167	1.41822	1.57226	1.36514								0.4868	0.37902	0.355711	0.340639					0.363478	0.379804
		1.01594	0.959923	1.01559		1.67342	0.927943	0.908937		0.94881	0.946352	1.27174	1.59571	1.89595	2.23694	1.82321	1.65386	1.59235	1.61245	1.6244	1.56124	1.54698	1.48303	1.56414	1.59289	1.64985	1.62694	1.60371	1.54751	1.45029	1.38824	1.352	1.33716	1.33298	1.31493	1.4608	1.39795	1.41406	1.4938	1.55066	1.53513	1.58545	1.58749	1.56331	1.50417	1.43135	1.40729	1.30525	1.33393
		0.501079	0.442615	0.462465	0.458576	0.403943	0.374064	0.318092	0.38569	0.38753	0.478939	0.573956	0.689499	0.774996	0.92124		0.757758	0.488629				0.456926	0.571389	0.472648	0.481045		0.285993	0.561346	0.59932	0.59239	0.597547		0.667212			0.667494	0.738447	0.614891	0.936608	0.846068	0.742316	0.686499	0.670668	0.689278	0.617216	0.62664	0.706017	0.736345	0.791478
			0.523823	0.51343	0.651366	0.608342	0.616294	0.700469	0.775201	0.819684	0.838285	0.972943	0.972079	1.09151	1.15931	1.23956	1.21962	1.16982		1.29108	1.25187	1.23025	1.29861	1.25791	1.16957	1.11297	0.999518	0.970036	1.00481	0.973946	0.961326	0.985497	1.07128	1.09357	1.15638	1.20259	1.22278	1.23535	1.157	1.13035	1.19235	1.22888	1.18571	1.14306	1.2095	1.03657	1.06205	1.14256	1.26354
			1.03355	1.01055	1.00028	1.02748	0.967551	0.92755	0.904458	0.886955	0.941356	0.98214	0.99954	1.04097	1.02821	1.19095	1.03695	1.08488	1.04938	1.01763	0.91794	0.883185	0.879886	0.896985		0.862455	0.917668	0.859265	0.771326	0.772607	0.758209	0.809846		0.791113	0.717236	0.685933		0.712899	0.697304					0.671756	0.661135	0.727328	0.975978	0.91381	0.924577
			0.559656	0.706717	0.777277	0.896176	0.888629	0.914745	0.821484	0.868208	0.882952	0.950232	1.04863	1.07477	1.20362	1.17737	1.27614	1.18724	1.27801	1.3229	1.40997	1.40435	1.43098	1.24467	1.16881	1.07705	0.990122	1.01684	1.00371	0.926991	1.05665	1.12101	1.13946	1.1791	1.21221	1.12362	1.13018	1.11581	1.06837	1.10983	1.11708	1.13777	1.11751	1.06409	1.0542	0.99524	0.966295	0.95197	0.950733
			0.662386	0.695539	0.693126	0.769102	0.882731	0.897862	1.05622	1.0837	0.949808	1.21608	1.16678	1.24021	1.28128	1.12794	1.19342			1.19835	1.13908	1.04908	1.06646	1.19562	1.04643	1.08611	1.08871	1.07827	1.04881	0.975171	1.05312	1.05044	1.14025	1.0785	0.985751	0.999245	1.05964	1.02303	0.971666	0.941659	0.978669	0.981151		0.874954		1.0496	0.933118	1.10951	0.978904
			0.298337	0.293863	0.315172	0.362093	0.3224	0.368081	0.395024	0.33212	0.329712	0.390766		0.339318	0.374188				0.587203			0.650648	0.67882	0.680256	0.734982	0.707042	0.709816	0.675488	0.697274	0.686694	0.609795	0.62079	0.533927				0.411474		0.48735		0.545613	0.579202	0.552365	0.57535	0.532885	0.549288	0.596295	0.591157	0.638635
			0.455029	0.367161	0.376647	0.406731	0.384857	0.409997	0.455357	0.463123	0.464784	0.507754	0.509523	0.502603	0.556437	0.518245	0.535247	0.60791		0.562411	0.445162	0.426898	0.42841	0.42801	0.438601	0.449138	0.428691	0.446103	0.474355	0.456081	0.45197	0.450274	0.475948	0.493161	0.535918	0.57704	0.559421	0.546349	0.559954	0.535628	0.494826	0.523396	0.476825	0.440057	0.459734	0.451219	0.46391	0.463371	0.478631
			1.13799	0.873973	1.0127			1.15752	1.16088	1.07403	0.904827	0.970669	0.857573	0.905728	0.969069	1.11631	1.10477	1.21234	1.26894	1.35293	1.14111	1.00664	1.301	1.08629	1.01456	1.03072	1.27064	0.775347	1.62575	1.78743		1.1151	1.04516	1.30005	1.01016	0.818742	0.860288	0.944159	1.02626	1.08086	1.08953	1.12421	1.25334	1.22522	1.21619	1.2225	1.21879	1.21003	1.22382
			1.40624	1.40744	1.45156			1.37354	1.43742	1.33428	1.30254		1.42388	1.32845	1.44796	1.42672	1.39328		1.53577	1.52316	1.38061	1.36403	1.35414	1.28312	1.30442	1.35391	1.38048	1.42886	1.48276	1.572	1.54125	1.53593	1.44857	1.43645	1.43407	1.40094	1.28409	1.19557	1.26763	1.25025	1.23079	1.17614	1.16585	1.1546	1.16236	1.18158	1.2048	1.2359	1.23724
			0.554313	0.582271	0.618778	0.669679			0.746881	0.833084	0.90639		0.902232						0.982941	0.922797	0.794629	0.795211	0.813979	0.837886	0.840442	0.880535	0.895361	0.889831	0.961893	1.03069	0.876112	0.842623	0.756165					1.89155	2.0715		2.06706	2.03969	2.19102	2.39608		1.5248	1.36125
			0.402573	0.376163	0.384594	0.424549	0.446489	0.444878	0.498953	0.494822	0.533411	0.549197	0.58632	0.543817	0.577561	0.62405	0.595726	0.576083	0.611592	0.581023	0.598024	0.63371	0.647218	0.733911	0.776772	0.767854	0.83076	0.907521	0.923653	1.01357	1.05909	1.11284	1.09193	1.12179	1.07909	1.04518	0.983007	0.80856	0.822882	0.869526	0.850454	0.817045	0.571943	0.527584	0.834568	2.28282	1.58611	1.31191	1.25034
			0.566447	0.520142	0.533912	0.53354	0.60216	0.646485	0.672969	0.576038	0.584386	0.644934	0.749924	0.791627	0.85374	0.943938	1.09233	1.20165	1.2441	1.15899	1.16163	1.15593	1.12479	1.18213	1.19263	1.2459	1.31921	1.35658	1.45829	1.56705	1.53595	1.55429	1.46423	1.41514	1.45152	1.37592	1.36213			1.25437	1.22623	1.21126	1.25711	1.2331	1.26001	1.21887		1.22428	1.21499
			0.776888	1.33145	1.43743	1.61582	1.55649	1.44131	1.39386	1.39569	1.35216	0.990518	1.12028	0.4392		2.00898	1.80697	1.86835		1.72376							1.67156	1.60226	1.39137	1.09595		1.1284	1.07155	1.52197	2.73067	2.87058	2.37253	1.99692	1.16983	1.05903	1.39573	1.61086	1.17362	0.977036	1.92694	1.96375	1.33349	0.871739
			0.760962	0.943938	0.791868			1.3523	1.22645	1.22786	1.1647	1.08204	0.945	0.919596	0.932067	0.966041	0.916916	0.852395	0.919348	0.897708	0.858211	0.856501	0.875261	0.875376	0.857982	0.901071	0.929805	0.975687	1.00419	1.0551	1.00539		1.01729	0.956279	0.944943	0.95962	0.969578	1.16333	1.09163		1.0487		0.800187	0.716016	0.72525	0.6686	0.629843	0.69063	0.810923
			0.77811	0.949319	1.13089	1.15683	1.10184	1.01597	0.921525	0.863511	0.845585	0.790788	0.779008	0.774674	0.799145	0.84793	0.983188	0.811321	0.845743	0.958429	1.09801	1.08013	1.18831	1.19903	1.14527	1.1144	1.15491	1.20268	1.22998	1.26542	1.21883	1.21406	1.22149	1.24685		1.3082	1.3199		1.28403				1.35221	1.40951	1.39559	1.34028	1.43506	1.42896	1.4425
			0.657945	1.01755	0.952953	0.992651	1.10242	0.99808	0.833433	0.913367	1.00993	0.917234	0.94395	0.806406		0.848152			0.883914	0.911238		1.06968	0.918591	1.08616		1.17443	1.2084	1.3112	1.4576	1.58674	1.66954	1.86358	1.86957	2.10985	2.32327	2.68747	2.18177	1.70628	2.59079	2.30558		1.17563	1.79288	1.09026	1.56404	1.57656	1.77549	1.73163	1.16388
				0.957008	0.863807	0.816553	0.721499	0.75664	0.671151	0.60508	0.708487	0.677759	0.730005	0.779387	0.934974	1.01689	1.06971	1.26602	1.40214	1.20352	1.28136	1.47422	1.58335	1.762	1.96356	2.14361	2.0277	2.09775	2.1696	2.02554	1.76513	1.83908	1.80542	1.93423	1.90789	1.80114	1.88455	1.63627	1.48213	1.39667	1.34089	1.23187	1.26458	1.2034	1.27505	1.12071	1.10311	1.07213	1.00233
				0.685482	0.677778	0.67603	0.699384	0.689806	0.647369	0.777831	0.678431	0.656167	0.593955	0.687839	0.731948	0.816084	0.769493		0.791158	0.828329	0.773865	0.785244	0.770551	0.782505	0.750155	0.757455	0.761279	0.775023	0.774241	0.762428	0.768476	0.825921	0.886006	0.882723	0.952754	0.961107	0.969275	0.930626	0.981791	1.03907	1.02331	0.955764	0.912649	0.95707	0.962784	0.976522	1.00185	1.05574	1.07999
				2.97838	3.22314	3.90581	3.5822	3.88987	3.64777	2.7013	2.81764	2.66615	2.8272	3.58245	2.35593	3.54581	3.16462	3.87493	3.92951	2.61356	4.086	2.21925	2.08046	2.49978	3.1106	2.89887	3.34185			1.52162	1.40545	1.76978	1.61726	1.65013	1.86791	1.65885	1.8757	1.84689	1.49434	1.44708	1.76131	1.74076	1.18111	2.23194	1.90103	1.902	1.45941	2.0326	2.55794
				1.28041	1.0436	1.46949	1.2328	1.54476	1.90741	1.26291	1.29795	1.12223	0.964061	1.13058	0.742364	1.24691	1.50757				1.14467	0.976115	1.00906	1.0565	1.20224	1.06019	1.08803	1.03341	1.14182	1.16646	1.23085	0.972165	1.1208	0.89864	1.1039	1.14199	1.07981	1.11899	1.12747	0.996089	1.03226	1.10497	0.985155	1.1118	1.14793	1.10283	1.10744	1.06625	0.941839
				0.562031	0.69851	0.509833	0.738303	0.64011	0.78447	0.551264	0.516165	0.491946	0.459327	0.424951	0.370096	0.407067	0.407234	0.374964	0.442419	0.459921	0.331214	0.418338	0.606094	0.512802	0.452062	0.535179	0.515773	0.547495	0.603623	0.604249	0.617478	0.786777	0.858882	1.12328	1.28984	1.17041	1.14974	1.137	0.982991	0.940046	0.813151	0.789058	0.76764	0.741904	0.772771	0.796691	0.810534	0.849247	0.937138
				1.12772	1.10445	1.32693	1.31916	1.32422	1.51466	1.62798	1.7127	1.74077	1.70825	1.82641	1.80165	1.86616	1.81485	1.7795	1.91239	1.89073	1.90827	1.92244	2.14845	2.21899	2.21297	2.27755	2.21661	2.16943	2.16754	2.16301	2.24013	2.12738	1.98015	1.99051	1.82386	2.05027	2.04562	2.06939	2.13035	1.96226	2.08956	2.15672					1.27478	1.16602	1.16205
				0.767533	0.742255	0.798534	0.842031		0.883678	0.720278	0.742839	0.709152	0.52156	0.520507	0.4721	0.532387	0.424923	0.810238	0.4245	1.15349	0.641956	1.33564	1.8123	1.37383	1.64201	1.43917	1.30821	0.8015	0.845372	0.758702	0.482272	0.816919	0.582376	0.88376	0.569056	0.565169	0.501249	0.953298	0.770446	0.449839	1.17295	0.717882	0.45893	0.473166	0.376533	0.468101	0.490586	0.478546	0.506197
				0.476079	0.436273	0.476622	0.419693	0.425711	0.44841	0.439509	0.429365	0.41717	0.425019	0.496888	0.547159	0.597126	0.494849	0.483335	0.560818	0.634608	0.655878	0.680293	0.648812	0.625921	0.590653	0.601843	0.503965	0.491499	0.454451	0.458157	0.447741	0.398295	0.417445	0.42938		0.453934	0.414881			1.23909	0.993882	1.16111	1.16722	1.17461	1.30613	1.25937	1.3133	1.27242	1.45102
				1.88257	1.92531	1.89926	1.98988	2.00476	2.22164	2.27958	2.1939	2.0694	2.00752	1.87927				1.48627			1.25128	1.35114	1.38679	1.36954	1.2806	1.5179	1.38272	1.30922	1.29605	1.28347	1.28044	1.32052	1.27906	1.29909	1.23464	1.34477	1.38345	1.45655	1.47576	1.42694	1.47454	1.52934	1.59298	1.54768	1.56022	1.55058	1.47892	1.37397	1.22045
				0.758263	0.766644	0.673029	0.836777	0.78685	0.628263	0.61797	0.605043	0.716805	0.513948	0.587103	0.642117	0.668069		0.688643	0.971428	0.901502	0.6979	0.813533	0.919329	0.847624	0.949441	1.03888	1.09392	1.07207	0.926978	0.826614	0.836361	0.738934	0.854059	0.719371	0.726772	0.689222	0.506641	0.514819	0.600325	0.578611	0.561164	0.392707	0.386501	0.329741	0.351075	0.392966	0.470573		0.506412
				0.676661	0.662397	0.591036	0.545842		0.487033	0.448442				0.581759	0.625262	0.705144	0.74058	0.798273		0.922807	0.810844	0.865305	0.861597	0.920191	0.930518	0.963165	1.02275	1.00662	1.04763	1.05955	1.06842	1.08024	1.09743	1.10701	1.11756	1.09262	1.11911	1.11426	1.11711	1.13353	1.11637	1.09261	1.07072	1.04752	0.993806	1.0047	0.990705	0.996208	1.01534
				1.19491	1.16441	1.12716	1.08483	1.18527	1.24527	1.1534	1.25791	1.64198		2.96346	1.59138	2.00814		4.29875		2.15205	1.90272	1.69587		1.85655	1.57625	1.47749	1.53914		1.70513	1.66995	1.46276	1.48248	1.46932	1.27259	1.4821	1.42488	1.49436	1.86824	2.06816	1.93556	1.98479	1.78448	1.8747	1.72196	1.90918	1.84976	2.02881	1.91098	1.59115
				0.988945	1.00152	1.04765	1.06752	1.13889	1.10176	1.09277	1.07101	1.00757	0.953317	0.946505	0.981649		0.94564		1.22227	1.42707	1.47202	1.47215	1.74976	1.54557	1.24104	1.14708	1.36695	1.56471	1.19057	1.16458	1.19577	1.18508	1.11042	1.03836	1.04861	1.02548	1.07358	1.06718	1.13579	1.13841	1.14187	1.16139	1.29048	1.29305	1.35307	1.42592	1.43851	1.37996	1.36913
				0.680627	0.661915	0.658218	0.658084	0.852196	0.742453	0.704867	0.662341		0.726796	0.687536	0.879773		0.753321		1.26937	1.78821	1.15114	1.27961	1.1521	1.22314	1.32119	1.30175	1.31382	1.41538	1.53129	1.37069	1.39722	1.48201	1.70375	1.78684	1.74603	1.69074	1.54503	1.54362	1.47741	1.45775	1.34275	1.2235	1.23519	1.22098	1.2242	1.297	1.38532	1.3576	1.42251
				0.481254	0.360345	0.422908								0.888512	1.02202	1.10174	1.23254	1.26749	1.42402	1.42407	1.26336	1.57592	1.2816	1.37815	1.33141	1.50723	1.55999	1.62725	1.73267		1.62635	1.45355	1.53511							1.48934	1.44219	1.46557	1.36141					1.23777	1.26628
				1.57333	1.45173	1.60687	1.53374	1.52219	1.43279	1.91625	1.69938	1.70811	1.47792	1.47911	1.55165	1.58862	1.78157	1.87051	1.67242	1.86167	1.74045	1.76277	1.81343	1.68991	1.91278	1.67696	1.89225	1.77156	1.65808	1.73079	1.79005	1.70871	1.70103	1.62339	1.82179	1.69373	1.70794	1.46043	1.60924	1.44633	1.54245	1.51403	1.53508	1.51754	1.55115	1.68518	1.4336	1.53859
				0.873688	0.798044	0.97695			0.817482	0.922503	0.827659	0.924379	0.989157	1.01967	0.967283	0.985059	0.976093	0.968456	0.965308	1.0316	0.968793	0.988275	1.0088	1.09022	1.05509	1.02127	1.09191	1.06948	1.20429	1.25153	1.27774	1.2589	1.24434	1.27089	1.15835	1.09012	0.995508	1.04638	0.993282	1.04328	1.00346	0.956302	0.881858		0.914047	0.899997	0.847051	0.819923	0.833387
					0.841972	0.863605	0.922797	0.966992	1.19346	1.17698	1.27896	1.28737	1.41246	1.41849	1.42447	1.46162	1.33822	1.25424	1.20286	1.11684	1.10824	1.04636	0.948872	0.991509	0.9344	0.988954	0.939724	0.981764	0.985212	1.03959	1.00803	1.0442	1.06005	1.09849	1.0822	1.09555	1.1108	1.11913	1.132	1.05936	0.979236	0.961471	0.834227	0.871016	0.912937	0.886817	0.835643	0.804604	0.719335
					1.28682	1.2681	1.45039	1.3302	1.21439	1.06461	1.04224	1.09634	1.21519	1.30746	1.43232	1.40722	1.48303	1.68947	1.59362	1.97047	1.83668	1.83887	1.6004	1.45258	1.50207	1.42711	1.3734	1.45072	1.41201	1.51014	1.43756	1.47673	1.44244	1.29886		1.40768		1.25339	1.05691	1.01696		0.931351			0.858393	0.883058	0.888725	0.878577	0.890011
					0.603437	0.580531	0.735289	0.764088	0.776636	0.596167	0.56523	0.523411	0.534146	0.528429	0.609999	0.616773	0.677616	0.713135	0.694441	0.675171	0.732913	0.769843	0.837119	0.8553	0.901092	0.853217	0.859187	0.829053	0.882826	0.897121								0.97805	1.01045	1.08293	1.01563	0.9425	0.927514	0.890842	0.903008	0.85635	0.784998	0.804655	0.820844
					0.740673	0.712911	0.75384	0.82068	0.827867	0.809568	0.84766	0.770886	0.841259	0.832112	0.941894					1.04221	1.05368	1.01249	1.05208	0.980894	1.0828	1.01899	1.04648	1.05627	1.04699	1.13517	1.13505	1.15622	1.18517	1.17983	1.26096	1.27185	1.26404	1.31777	1.31337	1.25488	1.10102	0.944709	0.889577	0.888151	0.908829	0.873063	0.855905	0.813244	0.523291
					2.76408	0.791707	0.682145	0.666283	0.63351	0.677008	0.733109	0.709662	0.791566	0.888945	0.96829	1.08207	1.10217	1.19027	1.16813	1.16455	1.11709	1.08666	1.08497	1.10078	1.17897	1.16467	1.11556	1.06563	1.03814	1.08152	1.18519	1.11291	1.12453						1.13484	1.11091	1.1419	1.0997	1.01886	1.13223	1.13046	1.03709	1.0839	1.26211	0.930891
					1.21389	1.4329	1.43262	1.47887	1.37218	1.64768	1.51226	1.22237	1.10509	0.932891	1.25469	1.05481	0.954676	1.02344	1.6617	1.27449	1.64987	1.59729	1.15042	1.24289	1.09503	1.07171	1.22324	2.02112	2.09704	2.22092	2.80126	2.54657	2.42649	2.49591	2.91066	2.97616	2.92415	2.3731	1.92889	2.01008	2.2015	2.67125	2.46907	2.11614	2.42286	2.26418	2.35334	2.33666	2.48712
					1.46666	1.86016	1.45806	1.46844	1.51088	1.35865	1.35363	1.50643	1.46155	1.76716	1.65047	1.7704	1.92646	1.64161	1.86279	1.85912	1.83006	1.83575	1.48966	1.41972	1.62585	1.80254	1.93218	1.91276	1.95099	1.87471	1.94224	1.96377	1.98769	2.14084	2.31715	2.29732	2.5519	2.31349	3.02204	2.92222	2.78319	2.50384	2.25037	2.4657	2.72262	2.63058	2.5619	2.6361
					0.796045	0.865619	0.862721	0.816818		0.783946		0.929028	0.907856	1.04817			1.25698				0.782258	0.828966	0.86806	0.88998	0.871722		0.805689	0.749372	0.735335	0.613513	0.602189	0.76616	0.837479	0.864305	0.785482	0.706735	0.658275	0.61645	0.657611	0.616592	0.598437	0.623915	0.618499	0.635921	0.624356		0.57154	0.587117	0.595436
					1.13858	1.16544	1.24494	1.24912	1.2577	1.40248	1.19479	1.15396	1.8061	1.2909	1.50003	1.83603	2.03817	2.01359	1.6329			1.41915	1.37215	1.29587	1.32654	1.41821	1.61954	1.65756	1.75465	1.79251	1.9483	2.07841	2.08734	2.36775	2.66038	3.54985	2.4597	2.19225	2.17016	2.43592	2.72216	2.75254	2.68246	2.60905	2.38364	1.81728	1.8619	2.08399	2.10378
						1.03068	0.92285	2.06345	2.48334	2.79147	2.79369	3.79371	3.2077	3.19091	2.18409	2.48696	3.57066	3.30123	2.07201	2.10262	2.32108	2.86853	2.69829	2.51269	2.36702	1.55023	1.48274	1.52932	1.08305	1.09822	0.949619	1.28084	1.49588	1.59365	1.70184	1.5533	1.36184	1.47604	1.36382	1.5889	1.76789	1.69091	1.39133	1.85987	2.1323	1.71539	2.1843	1.82573	1.58195
						0.918215	0.914697	0.874732	0.823173	0.711229	0.706185	0.688834	0.704379	0.746846	0.686255	0.775958	0.710522	0.793622	0.832327	0.819839	0.819437	0.878247	0.812263	0.878004	0.888374	0.966963	1.01996	0.996814	1.00608	1.00917	1.04142	1.00492	1.01742	1.01559	1.02929	1.02774	1.08544	1.14187	1.12344	1.15112	1.12788	1.17598	1.16177	1.13839	1.14574	1.18611	1.12944	1.2059	1.28375
						0.604356	0.726143	0.717596	0.901468	1.05212	0.999122				1.31572	1.23469	1.57866	1.19756										0.637939	0.670301	0.67267	0.65502	0.671919	0.658441	0.667817	0.56808	0.601085	0.579553	0.605369	0.558955	0.533909	0.621928	0.587152	0.612094	0.702605	0.657665	0.713741	0.667522	0.657714	0.656179
						0.330203	0.374623	0.399135	0.389966	0.424896	0.498763	0.557668	0.652411		0.718775	0.718687	0.577627	0.573355	0.481656	0.526595		0.408071	0.374357	0.4036	0.39922	0.3797	0.400367	0.377613	0.406719	0.440035	0.432868		0.447251	0.454695	0.499329	0.531464	0.557678			0.801995	0.722709	0.796167		0.843214		0.848909			1.48297
						1.04364	1.0223	1.03591	1.03584	0.993679	0.961202	1.01108	1.05241	1.1313	1.11145	1.12443	1.16331	1.27634		1.14737	1.13221	1.06693	1.16011	1.05826	1.28983	1.29664	1.23619	1.20314	1.29392			1.29733	1.38951	1.37739	1.40389	1.39574	1.78049	1.85841	1.46474	1.47696			0.860431	1.4829					1.62214
						0.500895	0.439053	0.394152	0.293894	0.310869	0.340844	0.423589	0.561308	0.590642	0.618518	0.590366		0.511208	0.527721	0.451689	0.476093	0.454298	0.488298	0.469999	0.487708	0.493888			0.589034	0.653206	0.562553	0.540855	0.702385	0.619709	0.787542	0.730853	0.75404	0.95357	0.538353			1.70605		1.77045	1.70944		1.70874	1.91024	1.85666
							1.26398	1.25429	1.113	1.03108	1.02615	0.932774	0.894697	1.01704	0.901543	0.896976	0.908469	0.962445	1.04703	1.07592	1.04855	1.06533	1.07041	1.16158	1.22294	1.20496	1.2341	1.19672	1.25931	1.32158	1.33156	1.32358	1.30979	1.32704	1.31948	1.31994	1.3434	1.42524	1.4433	1.42449	1.45624	1.3693	1.5169	1.50173	1.51547	1.59463	1.53083	1.56764	1.51794
							1.32715	1.77714	1.92541	1.90272	1.95889	2.16013	1.97983	1.64563	1.76977	1.83969	2.40202	2.63893	2.0651	1.47439	1.56497	1.50836	1.41005	1.13981	1.42964	1.83619	1.48721	1.47213	1.94636	1.73782	1.72694	1.18943	1.27711	1.31819	1.34718	1.26452	1.71379	1.3291	1.4719	1.3945	1.62559	1.33975	1.45258	1.43396	1.57055	1.43503	1.58566	1.63968	1.78842
							0.584847		0.574247	0.551479	0.57061		0.559164	0.574053	0.581757	0.580013			0.67616	0.700149			0.589869	0.687868	0.76225	0.799532	0.868171	0.902951	0.981657	0.945038	0.910533	0.884054	0.892662	0.750575	0.700112	0.625744	0.614797	0.644992	0.633327	0.651194	0.695549	0.736262	0.762898	0.785768	0.770029	0.788438	0.801546	0.824449	0.849628
							0.249898	0.26814			0.609658	0.57892	0.357725	0.397868	0.437086	0.563426	0.550832	0.688276	0.753117	0.834115	0.841941	0.896727	0.805793	0.806363	0.860514	0.840857	0.861602	0.914169	0.926359	0.96112	0.996174	1.0441	1.18948	1.20472	1.22433	1.12236	1.15336	1.17593	1.18577	1.12169	1.1561	1.12738	1.1005	1.02163	1.04653	1.00013	0.928763	0.90094	0.890501
							1.05569	1.2957	1.40224	1.45054	1.36762	1.39873	1.32503	1.21243	1.2168	1.19405	1.15009	1.1472	1.29876	1.22586	1.35662	1.42632	1.3282	1.30823	1.421	1.3778	1.23467	1.32611	1.29284	1.39169	1.33121	1.33163	1.26565	1.3287	1.4761	1.30146	1.25207	1.27504	1.25563	1.27086	1.25574	1.23421	1.16423	1.12912	1.0922	1.07669	1.10806	1.09898	1.18425
							0.66722	0.765682	0.780684	0.825404	0.838834	0.874014				1.10066	1.07842	1.10075			1.17814	1.13007	1.1593	1.15743	1.14496	1.18356	1.18802	1.17391	1.1592	1.11975	1.1166	1.07982	0.993241	1.03429	0.99398	1.06472	1.009	1.02041	0.994785	0.991675	1.02596	1.0292		1.10258	1.1329	1.22484	1.31896	1.40948	1.51279
								1.32083	1.62937	1.61396	1.63081	1.80714	1.85573	2.01397	2.07566		1.94079	1.74435	1.67207	1.50769	1.5853	1.45163	1.42451	1.4345	1.59401	1.53042	1.59143	1.67315		1.65909	1.68289	1.93886	1.99114	1.99311	1.94245	1.71344	1.51569	1.26246	1.17255	1.12921	1.04053	1.05514	1.01421	1.00578	1.02765	1.0309	1.04601	1.07554	1.13473
								1.16719	1.17179	1.18511	1.21956	1.24083	1.13943	0.979868	1.06488	1.0337	0.960116	1.16995	1.2271	1.28294	1.31534		1.31612	1.17295	1.08047	1.11672	1.14083	1.13536	1.13896	1.13693	1.08794	1.08076	1.06109	1.08734	1.15432	1.08797	1.10412	1.13512	1.07132	1.06409	1.00147	0.953435	1.02209	0.982115	0.92512	0.921871	0.901297	0.927454	0.930202
								0.441633	0.840966	0.764968			0.622887		0.706319	0.756731	0.684031	0.771135	0.710755	0.770887	0.747435	0.778774	0.678802	0.738095	0.864409	0.807822	0.793915	0.808314	0.740945	0.723559	0.774507	0.819352	0.836986	0.821091	0.806253	0.830107	0.823907	0.739965	0.737606	0.713029	0.665402	0.645597	0.653615	0.668088	0.624099	0.654918	0.700156	0.684543	0.656094
								1.13205	1.39869	1.59886	1.55263	1.60723	1.38722	1.53434	1.3859	1.39291	1.27266	1.15413	1.00151	0.902968	0.848982	0.763532	0.708279	0.721592	0.746871	0.784067	0.819308	0.832463	0.789842	0.846118	0.846687	0.855735	0.809349	0.858986	0.856482	0.845855			0.934587		0.925432	0.882231	0.876605	0.91912	0.996531	0.926519	0.920271	0.861452	0.90877
								0.63526	0.585492	0.643833	0.777767	0.711931	0.468734	0.765865	0.662563	0.604087	0.639025	0.721131	0.759628	0.750691	0.86833	0.950048	0.910418	0.922989	0.961214	0.926091	0.965044	0.878156	0.898747	0.792777	0.82232	0.791511	0.710299	0.731632	0.703804	0.619657	0.623254	0.64996	0.592239	0.62789	0.632698	0.658356	0.668858	0.64164	0.702589	0.78358	0.855014	0.811677	0.871693
									0.475047	0.456575	0.599146	0.45598	0.515685	0.387856	0.457117	0.730332							0.942867	0.982775	1.00672	1.04044	1.03644	1.02076	0.944276	0.940439	0.957114	0.984109	0.960249	0.942621	0.994643	0.916741	0.938677	0.917187	0.850024	0.843144	0.861681	0.910926	0.804449	0.763866	0.739595	0.671257	0.737956	0.723206	0.659026
									0.849265	0.935841	0.95486	1.00695	0.928302	1.00584	0.99429	1.01927		1.17213	1.15441	1.27965			0.790864	0.806867	0.800204	0.870431	0.954213	0.986193	1.05729	1.10959	1.12585	1.14026	1.1686	1.17416	1.26809	1.2074	1.16406	1.18	1.1086	1.13218	1.09398	1.12866	1.14199	1.17183	1.16872	1.16971	1.20504	1.28297	1.13424
									0.82274	0.916979	0.78161	0.955709	2.16156	2.97258	1.58757	2.47517	1.32048	2.59586	3.64982	2.62663	2.20807	2.2248	2.16618	1.95502	1.81666	1.77967	1.91741	1.7362	1.78779	1.48058	1.46717	1.53583	1.41886	1.69123	1.67324	1.63405	2.02063	2.01752	2.26024	2.06516	1.99813	2.07369	1.97173	1.91881	1.73444	1.75268	1.58612	1.48086	1.44879
									0.965021	1.13049	0.936847	1.03765	1.05615	1.1158	1.36251	1.51943	1.52729	1.54184			0.995072	1.06598			1.14646	1.23238	1.18637			1.03336	1.04503	1.0808		0.968846		0.823951	0.795362	0.850406	0.847711	0.923395	0.889401	0.876807	0.837026	0.763464	0.790331	0.762171	0.729934	0.717654	0.661664
									0.322087	0.308144	0.367407	0.328787	0.343379	0.444949	0.368961	0.450318	0.543616							1.19061	1.23872	1.1474	1.09958	0.967309	0.945077	0.910345	0.879116	0.831951	0.813871	0.773786	0.770911	0.731452	0.739913	0.738748	0.753109	0.723158	0.714293	0.672866	0.70386	0.659281	0.673757	0.614047	0.560307	0.525769	0.466869
										0.403873	0.554368	0.499751	0.452635	0.538516	0.556798	0.65612	0.807339	1.0531	0.995565	0.83825	0.895233	0.877533	0.758141	0.659123	0.64913	0.567467	0.595338	0.598851	0.56842	0.607375	0.767321	0.910526	1.03843	1.15015	1.30113	1.144	1.11669	0.968159	1.02122	0.955826	1.02848	0.954968	0.850373	0.779085	0.736439	0.823278	0.761149	0.79325	0.792972
										0.555906	0.686221	0.766861	1.20442	1.63209	1.97267	2.36394	2.21637	2.31777	2.38104	2.02768	2.04159	1.90566	1.84227	2.10865	2.10841	2.01731	1.90303	1.65967	1.43652	1.40008	1.5402	1.48565	2.00109	2.10489	2.19348	2.05685	1.80514	1.54649	1.62755	1.69646	1.71192	1.85823	2.16179	2.24047	2.2635	2.35655	2.30074	2.3134	2.1911
										0.116004	0.154313	0.615418	1.61153	1.11944	0.899206	0.878819	0.659202	0.653259	0.647271	0.679125	0.700548	0.579264	0.573863	0.554031	0.574399	0.606376	0.59232	0.580787	0.549515	0.547645	0.572423	0.767069	1.02836	1.0548	1.05342				1.09996	1.17682	1.03962	1.0843	0.948026	0.9409	0.982018	1.05112	1.04074	0.970749	0.953384
										1.38231	1.33808	1.43629	1.53011	1.67668	1.68251	1.64588	1.60286	1.43322	1.50236	1.35929	1.23634	1.21625	1.1115	1.0171	0.963618	0.865461	0.771467				0.71324		0.660662	0.701283	0.705243	0.758607	0.782194		0.842458		0.87907	0.829282	0.803071	0.814419	0.827823	0.805337	0.798217	0.806855	0.826215
											0.711754	0.808852	0.73892	0.661185	0.645505	0.61607	0.564093	0.555818	0.758325	0.73775	0.822451	0.850217	1.06111	1.08484	1.168	1.13567	1.29502	1.18946	1.17541	1.14049	1.0349	1.01792	0.98695	0.914186	0.974852	1.06522	1.02845	1.02094	0.980058	0.989163	1.03334	1.06826	1.03205	1.06473	0.993163	0.858369	0.86168	0.818292	0.723357
											2.01727	1.51577	1.65204	1.38483	1.25401	1.33316	1.30156	1.40167	1.36249	1.38858	1.4483	1.39297	1.34301	1.36876		1.26499	1.29018	1.37025	1.34851	1.34318	1.31832	1.2462	1.17967	1.17977	1.25727	1.1764	1.15086	1.21004	1.23377	1.24145		1.14836	1.10313	1.15613	1.20571	1.228	1.16419	1.09557	1.08376
											0.467725	0.550174	0.564918	0.507143	0.597684	0.639463	0.744204	0.816029	1.00395	0.831923	0.876908	0.826102	0.795603	0.824358	0.864583	0.851402	0.858007	0.927905	1.07739	1.15475	1.07847	1.15582	1.18224	1.22134	1.12075	0.991696	1.00447	0.982794	0.948087			0.992184	0.925528	0.893852	0.858048	0.722113	0.659547	0.531371	0.490441
											1.45716	1.23212	1.16026	1.32946	1.42207	1.50477	1.48595	1.47458	1.349	1.24373	1.24638	1.27815	1.25375	1.24588	1.21665	1.26524	1.17677	1.18916	1.18004	1.25995	1.23194	1.20969	1.275	1.29098	1.36866	1.28459	1.31101	1.21032	1.18906	1.24495	1.20582	1.18805	1.21072	1.19043	1.23661	1.19561	1.23197	1.15935	1.18127
											0.62899	0.640531	0.533615	0.559438	0.292713	0.312357	0.287655	0.310928	0.311898	0.316788	0.212465	0.177829	0.241002	0.25651	0.285947	0.351541	0.372617	0.353356	0.248462	0.160708	0.318517	0.329819	0.39944	0.361087	0.452177	0.466429	0.547906	0.587076	0.746199	0.830923	0.796949	0.790095	0.793138	0.813234	0.835843	0.879477	0.854708	0.869327	0.8533
													0.490462	0.731973	0.821683	1.40564						1.29382	1.30225	1.31516		1.37195	1.42424	1.42253	1.40245	1.45991	1.32175	1.29886	1.19848								1.00329	0.983978	0.961824		0.986371	0.990827	1.04486	0.999235	1.01974
											0.360616	0.38113	0.422986	0.456621	0.454981	0.502434	0.495721			0.556523	0.565641	0.57138	0.584894	0.588399	0.636289	0.657206	0.699248	0.724138	0.752993	0.866508	0.86836	0.871497	0.809572	0.865741	0.728553	0.647449	0.541429	0.488413	0.532444	0.511944	0.467786	0.446022	0.349201	0.269599	0.222137	0.237433	0.157434	0.177737	0.21902
											0.67814	0.766439	0.702859	0.725415	0.962462	0.925775	0.913928	0.981559	0.94433	0.910382	0.974468	0.920913	1.04705	1.05811	1.05861	1.06343	1.08399	1.08241	1.03014	1.08553	1.05363	1.02967	1.03359	1.11477	1.15123	1.16289	1.08756	0.992194	0.905733	0.814495	0.744556	0.713969	0.689333	0.656943	0.604444	0.621095	0.594041	0.56856	0.55215
											0.795711	0.797151	0.876272	0.85571	0.87679	0.873301	0.896976	0.839597		0.741722	0.875837			0.822523	0.699825	0.776152	0.839035	0.784051	0.825073	0.741699	0.730078	0.776052	0.791597	0.742246	0.727007	0.712674	0.721935	0.668641	0.74719	0.73728	0.738858	0.699401	0.658542	0.678882	0.730475	0.681623	0.692295	0.736089	0.704515
																						0.887529	0.816728	0.9296	0.917731	0.993367	0.957446	0.938524	0.888877	0.758655	0.711546	0.717378	0.678374	0.63094	0.561391	0.603427	0.581386	0.531901	0.499906	0.449876	0.45937	0.409746	0.398337	0.378566	0.376189	0.340901	0.285335	0.388324	0.328285
												0.433221	0.443153	0.457127	0.456651	0.494699	0.549404	0.477771		0.57507	0.577195	0.60464	0.655997	0.628473		0.616354	0.560293	0.561183	0.565042	0.552292	0.551076	0.542084	0.568855	0.558308	0.567046	0.512823	0.547513	0.525127	0.51544	0.53815	0.544286	0.53324	0.580586	0.595615	0.542057	0.560224	0.546258	0.564042	0.579505
												0.745959	0.829021	0.870924	0.860227		0.935322		1.13334	1.10688	1.1423	1.14321		1.02842	1.08536				0.964612	0.874171	0.825747		0.775663	1.13391	1.1186	1.15549	1.09104	1.02214	1.12951	1.10813	0.784139	0.790459	0.793895	1.039	0.837546	0.822062	0.839182	0.847824	0.876872
													0.898934	0.894809	0.930584	0.964458	0.952543	0.897892	0.904315	0.916152	0.928831	0.879816	0.890285	0.841175	0.782085	0.827233	0.759836	0.775481	0.758877	0.772843	0.750401	0.757062	0.756254	0.75164	0.779089	0.731974	0.737562	0.730679	0.768568	0.750355	0.709189	0.699108	0.665853	0.636483	0.626023	0.632657	0.612351	0.630071	0.607398
													0.466101	0.592572	0.648176	0.735052	0.766748	0.702465	0.630835	0.600094	0.610997	0.572697	0.565819	0.580975	0.554731	0.617457	0.664079	0.656048	0.751545	0.670686	0.710852	0.644152	0.689363	0.667021	0.628425	0.693463	0.743576	0.814235	1.00065	0.842895	0.852414	0.800855	0.770726	0.768878	0.732882	0.68621	0.682962	0.591664	0.548822
													0.450099	0.501673	0.682844	0.850017	0.947312	1.14744	1.23149	1.21736	1.14461	1.13248	1.09233	1.02651	1.01146	1.00162	0.921335	0.983637	1.01863	1.06301	1.16686	1.19792	1.29016	1.26183	1.17846	1.10627	1.07482	1.01473	1.02409	1.03846	1.01669	0.986754	0.958889	0.941525	0.962914		0.931595	0.94146	0.953102
													0.625093	0.678334	0.696083			0.863352		0.891075	0.811322	0.806542	0.832954	0.808956	0.915055	0.883888	0.83874	0.83765	0.822915	0.773671	0.736828	0.693581	0.692488	0.68323	0.619384	0.572547	0.526072	0.577585	0.554212	0.5515	0.62283	0.657212	0.622137	0.603001	0.620029	0.611843	0.650344	0.645719	0.591516
													0.533486	0.525911	0.569541	0.478578	0.567477	0.731475	0.997547	0.767291	0.691891	0.651157	0.676405	0.720668	0.718842	0.811677	0.794293	0.868401	0.916486	0.968778	1.07178	0.99413	1.01071	1.09441	1.09939	1.10364	1.14726	1.09845	1.07434	1.02111	1.04765	0.914161	0.873599	0.798727	0.771279	0.730834	0.699078	0.673144	0.560284
														0.558076	0.650883	0.732497	0.675216	0.79681	0.859502	0.779977	0.764773	0.734062	0.694553	0.755233	0.786688	0.788792	0.831211	0.836179	0.901029	0.92711	1.01621	0.990686	0.977039	0.966693	0.997478				0.850645	0.829531		0.825447	0.769332		0.79902	0.778421	0.841373	0.779478	0.817395
														0.799503	0.742702	0.580484	0.665055	0.745436	0.828153	0.903101	0.88209	0.948886	0.821596	0.82846	0.85483	0.972177	0.947875	0.971386	0.919523	1.0037		0.983332	1.05386	1.09956	1.07815	1.05996	1.00662	1.02442					0.825127	0.776807	0.955976	1.07441	0.916987	0.993785	0.898092
															0.56657	0.535261	0.441194	0.517161	0.35035	0.53038	0.765906	0.811539	0.762163	0.706172	0.738746	0.651084	0.571167	0.529492	0.511969	0.485578	0.498774	0.525392	0.564081	0.576032	0.589303	0.597491	0.650615	0.666866	0.719408	0.762182	0.773038	0.741671	0.707998	0.731304	0.731738	0.689209	0.70085	0.706961	0.673287
																1.06463	1.1301	1.18087	1.10656	0.955793	1.05147	0.985862	0.932313	0.969649	0.89562	0.903905	0.925164	0.893681	1.02694	1.06365	1.06984	1.20834	1.26886	1.26537	1.16299	1.3573	1.34934	1.35927	1.46392	1.39309	1.40559	1.5064	1.60753	1.78725	1.80417	1.93526	1.90118	1.94388	1.8973
																1.52986	2.77373	2.5722	1.66349	1.58947	1.40287	1.30714	1.06726	0.96415	1.30696	1.31319	0.856136	1.25161	0.39692	0.48715	0.393938	0.781758	0.806069	0.792468	0.983242	1.1081	1.16849	1.71031	1.97293	1.92776	1.78665	1.6552	1.50642	1.59741	1.44055	1.09307	0.987	1.29686	1.31595
																0.595993	0.643153	0.588997		0.581733	0.971324	0.890265	0.898953	0.810126	0.854637	1.02148	0.98852	1.09206		1.00724	1.04758			1.20044	0.924847	0.924261	0.734522	0.730908	0.653329	0.683661	0.642296	0.630985	0.860375	0.796281	0.745869	0.81836	0.741448	0.643997	0.624141
																0.768662	0.791198	0.824613	0.847097	0.85006	0.827182	0.798655	0.813893	0.790036	0.843874	0.8024	0.827847	0.840834	1.22235	0.92392	0.886144	0.87365	0.834838	0.898237	0.827775	0.867627	0.865775	0.845138	0.901189	0.977472	1.01299	0.985858	0.936994	0.917067		0.830045	0.777781	0.701558	0.670382
																0.427208	0.418908	0.452289	0.45477	0.454268	0.523289	0.514796			0.500632		0.555119					0.593532	0.642769	0.573592	0.608344		0.580395		0.591562	0.642888	0.669683	0.617542	0.635032	0.678881	0.644159	0.599899	0.567945	0.575766	0.567917
																0.45138	0.485887	0.438736	0.392814	0.407862	0.397103	0.427625	0.431613	0.449585	0.489785	0.430659	0.458189	0.490974	0.527441	0.510171	0.52371	0.55589	0.618951	0.640215	0.652963	0.658435	0.663064	0.637206	0.588788	0.530397	0.56726	0.538604	0.455839	0.461216	0.46708	0.422203	0.416295	0.454621	0.401247
																0.506159	0.508836	0.631965	0.791826	0.779959	0.750409	0.660313	0.682064	0.668155	0.670124	0.679739	0.682243	0.731963	0.755158	0.724022	0.825985	0.820809	0.849808	0.908684	0.92596	0.950207	0.967358	1.09293	1.08157	1.14913	1.08932	0.999153	1.05715	1.01764	0.947911		0.977132	0.833843	0.921684
																	0.992761	0.990238	0.910558	0.699764				0.914103		0.958795	0.949574	0.962656	0.900876	0.996262	1.01364	0.901842	0.857458	0.884943	0.876203	0.904029	0.906969	0.952821	0.90052	0.872656	0.847264	0.803778	0.763032	0.757247	0.75465	0.756501	0.750361	0.753637	0.739858
																	0.802493	0.774906	0.69253	0.650858	0.568634	0.454125	0.432515	0.459074	0.454474	0.457419	0.464654	0.484602	0.527258	0.537146	0.554338	0.541741	0.526841	0.539001	0.515979	0.48073	0.496071	0.520505	0.481487	0.444679	0.456298	0.424443	0.387033	0.39851	0.44911	0.400538	0.397171	0.400578	0.409356
																	1.54897	1.22462	1.00231	1.08245	1.15015	1.07909	1.18402	1.14793	0.972853	0.907342	0.886685	0.863437	0.751797	0.726913	0.819638		1.13596	1.16673	1.08123	1.05423	0.945746	0.910883	1.03529	1.01457	1.029	0.958232	1.00379	1.06226	1.08268	1.06161	1.11549	1.11513	1.0876
																	0.999765	0.938699	0.934434	0.915127			1.05788	1.09854	0.730093	0.467223	0.586722	0.606701	0.618497	0.611455	0.663889	0.792646	0.746264	0.722369					0.578396	0.672399	0.529755	0.514334	0.487915	0.43976	0.560566	0.381263
																		3.85927	3.11975	2.37994	1.83232	1.77781	1.81685	1.60646	1.51171	1.51296	1.22527	1.06684	1.19754	0.857081	0.93334	0.798711	0.964678	0.877019	0.729745	0.867239	0.98904	0.986166	1.19263	1.23285	1.33595	1.1515	0.988773	1.00092	0.846594	0.922102	0.995246	1.22924	0.956272
																		0.338756	0.35318	0.273205	0.376863	0.370229	0.419912	0.385547	0.331952	0.367115	0.389062	0.419676	0.373153	0.351601	0.313285	0.383482	0.428462	0.429214	0.432635	0.565068	0.548761	0.547316	0.489454	0.574386	0.357078	0.415216			0.477574	0.513448	0.456546	0.4633	0.459009
																		0.836693	1.0185	0.945676	0.964513	0.989053	1.10871	1.05578	1.07404	1.08062	1.05005	0.979531	0.961796	0.943001	1.04875	0.988824	1.05538	1.1963	1.30221	1.30635	1.35809	1.22835	1.12099	0.865231	0.838561	0.841594	0.764965	0.716441	0.722767	0.606276	0.736109	0.77251	0.645982
																			0.554459	0.717986	1.05915	1.39829	1.43091	1.03769	1.28941	1.40517	1.48083	1.07225	1.0839	0.914482	0.945278	0.87589	0.924973	0.89785	0.913377	0.915558	0.841303	1.00231		1.03964	1.02897	1.16734	1.10983	1.21478	1.28475	1.31957	1.33682	1.38351	1.26205
																			1.23182	1.18314	1.23612		1.64872	1.79592	1.81901	1.93767	2.02558	1.99015	1.95583	2.07269	1.99369	2.03559	1.91874	1.83339	1.78988	1.76623	1.5318	1.39614	1.20902	1.16551	1.18316	1.24854	1.29825	1.25947	1.12857	1.06185	0.995364	0.979649	1.02218
																			0.3624	0.733338	0.682676	0.677039	0.989768	0.802165	0.858675	0.933447	0.967652	1.02083	1.1246	1.19752	1.22735	1.2828	1.33223	1.3791	1.41936	1.41371	1.39354	1.33331	1.31206	1.30032	1.23949	1.24813	1.18508	1.14113	1.05202	1.09348	1.0801	1.01871	1.09198
																			0.586931	0.583819	0.614289	0.638239	0.726815	0.704674	0.692045	0.616096	0.639414	0.703344	0.67246	0.702416	0.693731	0.741377	0.776693	0.763995	0.778958	0.748083	0.756129	0.725671	0.705401	0.688612	0.679673	0.72495	0.680703	0.666524	0.660669	0.627511	0.717642	0.680767	0.739075
																			0.919052	0.965868	1.02286	1.02607	1.04428	0.973881	1.01482		0.933708	0.88498	0.879471	0.890887	0.943634	0.982041	0.994328	1.01083	1.11693		1.16371	1.1048	1.15761	1.0349								1.13891	1.18293
																			1.33588	1.1514	1.13954				1.06081		1.02278		1.06211	1.03077	1.02747	1.0313	1.00715	1.01002	1.0152	0.941658	0.936618	0.895365	0.893645	0.886026	0.937667	0.986822	1.01049	0.994441	1.0118	1.00577	1.03644	1.05941	1.06545
																				1.07329	1.0337	1.0036	1.02772	1.05026	1.01557	1.0309	1.03336	1.08777	1.16138	1.0975	1.17407	1.20256	1.22261	1.31056	1.33882	1.47016	1.48939	1.60083	1.80538	1.96961	1.92879	1.88711	1.93948	1.8417	1.72777	1.6434	1.5994	1.5631	1.61447
																				0.883346	0.948134	0.976536	1.09391	1.07227	1.02932	1.03657	1.04052	1.01744	1.02744	1.02419	0.960352	0.947703	0.929154	1.07925	1.01423	1.01165	1.0529		1.07683	0.839493	0.753555	0.743216	0.701349	0.632221	0.63266	0.488348	0.733457	0.463107	0.520875
																					1.13107	1.12754	1.08224	1.18573	1.19102	1.20087	1.22165	1.25613	1.23791	1.19956	0.746982	0.963047	0.885192	0.772992	0.59678	0.547599	0.506592	0.468805	0.468984	0.491474	0.512118	0.491498	0.443194	0.468046	0.486227	0.502628	0.520416	0.547349	0.601352
																					0.386379	0.312585	0.351509	0.393872	0.486783	0.554009	0.558383	0.506098	0.472654	0.417986	0.395276	0.36839	0.362407	0.348218	0.319299	0.323653	0.319757	0.322303	0.328756	0.330273	0.338938	0.293528	0.281844	0.282195	0.344211	0.334134	0.407246	0.53199	0.550882
																					0.836174	1.53618	2.71271	2.45854	4.07275	3.92072	3.32992	3.63898	2.5348	4.42382	2.94139	4.585	5.5999	6.49658	2.81819	2.26772	5.50069	4.66661	5.71976	5.2761	5.40432	4.90348	2.63669	4.58434	3.97486	4.46466	4.25306	2.81571	4.11748
																					0.669338	0.548971	0.541945	0.503511	0.562657	0.562364		0.522396	0.510807	0.471906	0.424413	0.464645	0.420063	0.447187	0.437678	0.46864	0.533465	0.505833	0.545039	0.593911	0.572216	0.59946	0.638091	0.682631	0.709269	0.663663	0.688227	0.678331	0.710177
																					0.576038	0.606309	0.627307			0.639997	1.20181	0.747124	0.883692	0.866833	0.847723	0.810323	0.905672	0.699455	0.651061	0.685095	0.790512	1.15901	1.01804	1.14313	1.72639	0.995621	0.95682	0.893373	0.78082	0.964841	1.11672	0.909582	1.10975
																					1.11056	0.815547	0.71943	0.736006	0.925562	1.03327	1.02795	1.03159	1.05701	1.18588	1.34803	1.38368	1.6799	1.78179	1.99103	2.0517	2.18992	2.08443	2.13984	2.07868	2.11177	1.96669	1.70054	1.58147	1.36945	1.27353	1.20327	1.15052	1.10359
																					3.7803	3.86407	3.24951	2.84091	3.08629	2.88174	2.74419		2.51423	2.63184	2.7851	2.45387	2.22395	3.73363		2.41844	2.45557	2.31676	2.0498	1.78358	1.24958	1.21208		0.990947	1.0828	1.10518	1.10684	1.00861	1.02415
																					1.04046	1.0479	1.18334	1.03805			0.730144	0.965741	0.98816		1.07089	0.952024	0.930214		0.913818	0.918443	0.874098	0.854065	0.791326	0.802362	0.802981	0.811559	0.841095	0.805566	0.808567	0.829252		0.841467	0.83642
																					1.01804	1.30966	1.12088			1.09046				0.935193	0.891014	0.899394	0.883053	0.847724	0.836688	0.852069	0.83379	0.839894	0.937214		0.952019	0.860103	0.81684	0.823806	0.740108	0.708383
																					0.775418	0.759968	0.781336	0.849202		0.723054	0.763007	0.766523	0.793526	0.831367	0.880791	0.886231	0.921656	0.951725	0.937571	1.26603	1.25587	1.26113	1.23984	1.18138	1.16221	1.0227	0.953103	0.961059	0.918514	0.883541	0.936464	0.914228	0.901335
																						1.63827	1.54938	1.49584	1.52577	1.5667	1.40728	1.44317	1.34033	1.32616	1.27871	1.29374	1.20374	1.10667	1.03717	0.985074	0.903036	0.878052	0.896093	0.880877	0.884708	0.912453	0.939115	0.970854	0.961117	1.02095	1.13418	1.18849	1.26828
																						0.834737	0.756238	0.712899	0.716203	0.719958	0.699316	0.645326	0.67509	0.639576	0.653676	0.635159	0.584707	0.521767	0.512373	0.53458	0.554092	0.526413	0.524087	0.548456	0.595577	0.53984	0.508787	0.522201	0.524583	0.517973	0.474652	0.44368	0.434845
																						0.513019	0.716006	1.18931	1.64898	1.78648	1.01554	1.09412	1.11195	1.1248	1.15355	1.13049	1.0331	1.00693	0.890582	0.772182	0.66981	0.628571	0.572953	0.578145	0.573999	0.596326	0.587833	0.650226	0.601048	0.578799	0.652664	0.641333	0.66084
																						0.499045	0.564804	0.492652	0.488857	0.463367	0.466092	0.489026	0.530329	0.518003	0.555256	0.541144	0.531758	0.74779	0.898382	1.04068	1.08501	1.16639	1.10418	0.937889	0.907026	0.806265	0.766801	0.581489	0.525827	0.517964	0.506044	0.505901	0.526417
																						0.804556	0.732776	0.772476	0.682595	0.804024	0.755992	0.711542	0.729276	0.706888	0.714321	0.759013	0.628533	0.651007	0.646303	0.638961	0.672494	0.639688		0.609954	0.694953	0.661696	0.657928	0.656417	0.636723	0.610169	0.603225	0.578399	0.616438
																						1.14354	0.923878	0.969109	0.830417	0.815094	0.729542	0.807671	0.844211	0.844291	0.776901	0.810916	0.811503	0.88661	0.860231	0.932424	1.01096	1.06509	1.03574	1.03615	0.928718	0.820749	0.68194	0.614549	0.550766	0.523087	0.508094	0.49354	0.470646
																						0.721525	0.62492	0.590192	0.549531	0.602919	0.562933	0.560593	0.565941	0.543324	0.535125	0.540237	0.553824	0.557904	0.56695	0.549166	0.561559	0.531096	0.520303	0.573779	0.638011	0.604194	0.633649	0.663125	0.635411	0.704387	0.716113	0.735739	0.72861
																						0.884672	0.739115	0.823957	0.889906	0.907948	0.86469	0.878758	0.748239	0.860318	0.804556	0.816914	0.798416	1.08856	0.940538	1.02422	0.975039	0.88494	0.917118	1.03802	0.897414	0.761087	0.74295	0.765055	0.762136	0.740816	0.681846	0.688922	0.667068
																						0.775781	0.649698	0.591641	0.536833	0.536846	0.630714	0.702251	0.68478	0.659173	0.727606	0.924993	0.912238	0.877315	0.764065	0.811529	0.792455	0.744589	0.812632	0.929403	0.901954	0.744649	0.583762	0.567576	0.516088	0.497198	0.514505	0.47496	0.483757
[truncated: 10,826 more rows]
[truncated: 111 more columns]

## Sheet: tfeb Con_0_01xEAA1xGluc
TFEBTR_TOP; cells cultured with 0.01xEAA 1xGluc; sampling time: 7.5 min; data are cells-by-time
[truncated: 12,683 more rows]
[truncated: 111 more columns]

[truncated: 4 more sheets: tfeb Con_0_5xEAA1xGluc, tfeb Con_0_0005xEAA1xGluc, tfeb Con_0_005xEAA1xGluc, tfeb Con_0_1xEAA1xGluc]
