# Supplementary material for: Continuous sensing of nutrients and growth factors by the mTORC1-TFEB axis
Source: eLife. 2023 Sep 12;12:e74903. doi: 10.7554/eLife.74903 (PMC10547473; doi:10.7554/eLife.74903)
Supplement: Figure 5—source data 4. [file elife-74903-fig5-data4.xlsx]

## Sheet: condition 01
Treatment Spike																					Insulin 10000 ng/ml
Cell	Signal	Treatment Group	0 minute	6 minute	12 minute	18 minute	24 minute	30 minute	36 minute	42 minute	48 minute	54 minute	60 minute	66 minute	72 minute	78 minute	84 minute	90 minute	96 minute	102 minute	108 minute	114 minute	120 minute	126 minute	132 minute	138 minute	144 minute	150 minute	156 minute	162 minute	168 minute	174 minute	180 minute	186 minute	192 minute	198 minute	204 minute	210 minute	216 minute	222 minute	228 minute	234 minute	240 minute	246 minute	252 minute	258 minute	264 minute	270 minute	276 minute
Cell_0001	TFEB_TR	Insulin 10000 ng/ml	1.35954	2.10052	1.46363	1.21712	1.41684	1.40195	0.698637	1.26767	1.79546	2.15269	2.34257	3.12056	1.60676	1.18707	2.97991	1.58977	1.40027	1.06349	1.46375	2.14674	2.24101	1.12048	1.99499	0.504081	1.15989	1.89254	1.07009	1.34505	1.27247	1.09887	2.46178	0.869349	1.05135	1.20618	1.526	2.29056	1.61165	1.94351	1.0425	2.14739	1.89611	1.66298	1.73154	1.29367	2.60491	2.16163	1.59291
Cell_0001	FOXO_TR	Insulin 10000 ng/ml	0.964333	2.92874	2.6656	4.18003	3.68639	3.25774	2.25626	2.59172	3.1577	4.14069	3.12473	3.43943	1.64599	1.55515	3.84979	3.99148	2.48324	2.49047	1.59275	2.31486	3.69339	2.5959	3.64551	1.57963	3.14669	3.12981	1.87887	2.2716	0.841571	2.37203	2.8366	3.57943	2.01862	3.69511	3.29763	2.25234	3.35979	3.80232	2.64992	3.84991	3.92636	2.55676	4.71779	1.12397	4.77317	2.54092	1.51069
Cell_0001	AMPKARt2	Insulin 10000 ng/ml	0.332461	0.53894	0.445957	0.569055	0.504614	0.467298	0.478068	0.450809	0.403962	0.424876	0.48129	0.477917	0.388302	0.581169	0.34748	0.530407	0.341864	0.502144	0.526915	0.293433	0.485576	0.504517	0.567866	0.613275	0.552846	0.438559	0.242186	0.431988	0.520732	0.370673	0.392449	0.600323	0.261241	0.576788	0.462206	0.473088	0.54868	0.563422	0.586363	0.579578	0.422555	0.38557	0.4608	0.631386	0.38368	0.422913	0.313599
Cell_0002	TFEB_TR	Insulin 10000 ng/ml	0.961808	1.51597	1.82572	1.32398	1.28196	1.36548	0.746647	1.24965	1.95753	3.84834	2.40108	2.54546	1.64708	1.5277	2.9155	1.56125	1.05357	1.16046	1.50991	1.64304	2.13566	1.39963	2.13108	0.486815	1.09076	2.06681	1.13542	1.35756	1.25061	0.955674	1.97791	0.847655	1.22457	1.43133	1.62382	2.90719	1.65499	1.91886	1.22697	2.39784	2.09946	1.79466	1.22959	1.46202	2.79629	1.87205	1.56083
Cell_0002	FOXO_TR	Insulin 10000 ng/ml	0.920843	2.81207	2.71887	4.04254	3.77783	3.32095	2.14059	2.56354	3.21263	4.23615	3.04791	3.32468	2.028	3.28569	3.43863	3.72301	2.29417	2.48907	1.7439	2.30181	3.67072	3.01346	3.42671	1.59473	3.45198	2.86416	1.34638	2.22443	0.82325	2.51758	2.65764	3.36797	2.04085	4.02799	3.54958	2.49192	3.34601	3.72196	2.62483	4.02372	3.77089	2.82684	4.76983	1.15298	4.90966	2.598	1.44227
Cell_0002	AMPKARt2	Insulin 10000 ng/ml	0.313238	0.546651	0.434547	0.546348	0.554565	0.491017	0.51894	0.457993	0.408512	0.412475	0.453473	0.510197	0.391605	0.53775	0.369467	0.537365	0.339959	0.51848	0.527029	0.283276	0.467309	0.512687	0.573808	0.603267	0.563024	0.460474	0.20906	0.435735	0.51729	0.429322	0.382483	0.595438	0.295902	0.537284	0.47285	0.450428	0.553681	0.533447	0.58554	0.549647	0.459936	0.351203	0.468151	0.632007	0.385962	0.446134	0.307432
Cell_0003	TFEB_TR	Insulin 10000 ng/ml	1.05606	2.22558	1.48691	1.74395	1.1912	0.551641	0.71221	1.16949	1.59322	2.60039	2.37222	2.49438	1.58873	1.58713	2.73224	1.56266	1.9954	1.1499	1.33938	2.03031	2.22924	1.40357	2.29576	0.51016	1.11611	1.77413	1.02101	1.29673	1.27275	0.85018	1.96201	0.872787	0.855548	1.66035	1.77456	2.21312	1.69832	1.67471	2.34749	2.61722	2.21649	1.80682	1.36986	1.4855	2.72221	1.95525	1.66287
Cell_0003	FOXO_TR	Insulin 10000 ng/ml	0.797079	2.82074	2.72221	4.01911	3.74051	2.17052	1.98254	2.65686	3.09735	4.44545	3.10462	3.22435	2.02251	3.41397	3.3943	3.61019	3.25729	2.60268	1.75634	2.45581	3.61547	2.76663	3.12825	1.64916	3.61424	2.4537	1.62738	2.07383	0.863013	2.33459	2.84234	3.38765	1.95282	3.78634	3.75779	2.58225	3.33222	3.73457	2.72912	4.00913	3.71959	3.05822	4.67082	1.1195	4.89501	2.3239	1.39573
Cell_0003	AMPKARt2	Insulin 10000 ng/ml	0.333091	0.570009	0.423796	0.530201	0.546115	0.565971	0.484678	0.474229	0.392425	0.404721	0.442214	0.528625	0.391563	0.456711	0.38509	0.579304	0.334503	0.507089	0.537989	0.274375	0.467019	0.497693	0.579634	0.609463	0.554267	0.486328	0.207055	0.431463	0.519254	0.416717	0.388602	0.605104	0.311192	0.552529	0.471654	0.476834	0.558682	0.499137	0.612072	0.549267	0.531531	0.338175	0.48518	0.646328	0.384908	0.426904	0.327873
Cell_0004	TFEB_TR	Insulin 10000 ng/ml	1.16041	1.77824	1.27503	1.48704	1.13231	0.537651	0.726408	1.22501	1.1847	2.39099	2.28684	2.24913	1.54493	1.97788	2.70595	1.45775	0.773265	1.19112	1.6019	2.20895	2.04493	1.29082	1.36134	0.539886	1.08037	1.70808	0.976004	1.24614	1.39356	0.9684	1.67049	0.87083	0.902681	1.63005	1.62592	2.08351	1.51921	1.69983	2.812	2.12009	1.46973	1.71709	1.49861	1.62362	2.80512	2.36398	1.99456
Cell_0004	FOXO_TR	Insulin 10000 ng/ml	0.791735	2.84636	2.68665	4.15235	3.66611	2.10558	2.09231	2.60311	2.95867	4.40392	3.05126	3.30061	2.11191	3.72288	3.33466	3.7265	2.005	2.63107	3.92025	2.28877	3.62	2.68114	3.43255	1.90111	3.67613	2.77395	1.47476	2.13517	0.893008	2.55006	2.83064	3.59795	1.87181	3.80525	3.61498	3.12044	3.44066	3.50909	2.72522	3.61632	3.72074	3.17021	4.90673	1.1384	4.74807	2.3305	1.67205
Cell_0004	AMPKARt2	Insulin 10000 ng/ml	0.300393	0.562452	0.427612	0.506775	0.555357	0.569249	0.508114	0.468195	0.37807	0.398988	0.42885	0.534552	0.383218	0.435632	0.402931	0.608419	0.351333	0.50394	0.530263	0.253402	0.465451	0.479122	0.570253	0.612456	0.561641	0.45414	0.232494	0.413551	0.496332	0.458477	0.380326	0.612453	0.336536	0.56297	0.485784	0.492002	0.563811	0.49149	0.607736	0.5462	0.591141	0.332795	0.492344	0.665334	0.374652	0.426134	0.394947
Cell_0005	TFEB_TR	Insulin 10000 ng/ml	1.14553	1.67599	1.05838	1.57406	1.08457	0.556246	0.734802	1.28142	1.8203	3.17204	0.482255	2.37097	1.49096	2.23478	2.73593	1.34337	0.737379	1.16534	1.88022	1.90712	1.98456	1.5374	2.00965	0.518747	0.910918	1.4044	1.08843	1.36192	1.25219	0.976883	2.1346	1.06989	0.854744	1.58651	1.80032	3.27458	1.86735	1.6454	2.75208	2.51842	2.79024	1.75118	1.08524	1.31916	2.98398	1.7033	1.77827
Cell_0005	FOXO_TR	Insulin 10000 ng/ml	0.724743	2.81763	2.65224	4.01183	3.55259	2.13146	2.15125	2.50556	2.88176	4.37759	1.29105	3.1959	1.93376	3.99046	3.72317	3.62809	2.11131	2.4424	3.9022	2.2411	3.42789	2.76802	3.13634	1.76181	3.41086	2.62807	1.89186	2.44845	0.951259	2.52843	2.90432	3.48695	1.87722	4.1555	3.58341	2.87537	3.44937	3.77649	2.73187	4.03889	3.62322	2.93509	4.66821	1.19737	5.10345	2.18504	1.5299
Cell_0005	AMPKARt2	Insulin 10000 ng/ml	0.325088	0.539369	0.427254	0.5141	0.546607	0.546394	0.525639	0.447636	0.388229	0.369594	0.597746	0.541504	0.394512	0.440331	0.406979	0.635007	0.348536	0.540254	0.505026	0.244975	0.457244	0.468472	0.575699	0.627939	0.514601	0.458873	0.317583	0.427189	0.507672	0.467741	0.39106	0.61198	0.291271	0.566547	0.497083	0.478108	0.543933	0.481643	0.611385	0.573976	0.606705	0.30371	0.488035	0.650746	0.390504	0.406403	0.437147
Cell_0006	TFEB_TR	Insulin 10000 ng/ml	0.976944	1.51158	1.11523	1.56348	1.0782	0.526088	0.743396	1.32504	1.6116	2.41959	0.470711	2.68397	1.48083	2.40777	2.58286	1.34276	0.788212	1.16184	2.00896	1.58063	1.82742	1.55842	1.04314	0.687239	0.895912	1.61466	1.1443	1.43572	1.24754	0.996583	1.87878	1.21699	0.860043	1.70613	1.74863	2.36191	1.83704	1.82102	2.41471	2.95313	2.12653	1.80175	1.15563	1.43503	2.94688	1.98348	1.64445
Cell_0006	FOXO_TR	Insulin 10000 ng/ml	0.752656	2.82083	2.32647	4.20055	3.44488	2.12718	2.30321	2.56026	2.8797	4.07208	1.33408	3.31058	2.04241	3.91824	3.48116	3.93882	2.2247	2.40815	3.98372	2.45805	3.25125	2.72982	3.13509	2.4857	3.38814	2.98768	2.09463	2.51037	0.972643	2.48933	2.91908	3.80055	1.88267	4.34393	3.46019	2.98889	3.40988	3.56224	2.75091	3.98736	4.1167	3.04937	4.59465	1.12652	4.71834	2.21131	1.59218
Cell_0006	AMPKARt2	Insulin 10000 ng/ml	0.2988	0.542468	0.422965	0.530793	0.546007	0.556486	0.514056	0.436208	0.326542	0.477715	0.601708	0.547087	0.399514	0.433629	0.384474	0.631283	0.365332	0.555356	0.488794	0.248078	0.455021	0.428637	0.585435	0.626345	0.497256	0.43744	0.339707	0.432027	0.520706	0.445236	0.398079	0.609345	0.292123	0.549486	0.549773	0.483796	0.537998	0.462377	0.592964	0.550984	0.617361	0.318449	0.485303	0.689677	0.38475	0.389069	0.437347
Cell_0007	TFEB_TR	Insulin 10000 ng/ml	1.06535	1.68638	1.18563	1.61154	1.13744	0.536218	0.741744	1.30108	1.85916	2.5238	0.462743	2.36697	1.4904	2.4742	2.62445	0.860726	1.15933	1.1037	2.03152	1.54391	1.79428	1.38889	2.11203	0.749163	0.971762	1.50407	1.25039	1.30075	1.1329	1.10106	2.07775	1.21645	1.00183	1.80245	1.68824	2.42148	1.81146	2.00234	2.2767	1.9574	1.64674	1.86921	1.11926	1.15927	2.92365	1.49745	1.36555
Cell_0007	FOXO_TR	Insulin 10000 ng/ml	0.80652	2.79961	2.5071	4.08857	3.50931	2.24238	2.59347	2.5218	2.84915	4.05281	1.34147	3.3443	2.06936	3.75233	3.74165	0.928948	2.58456	2.48178	3.79352	2.34696	3.04894	2.90417	2.9893	2.65098	3.59113	2.34325	1.97133	2.31148	1.00151	2.37896	2.91728	4.02018	1.83158	4.28	3.54364	2.83687	3.6028	3.40005	2.72681	3.84581	4.16575	3.54589	4.29047	1.10727	4.48128	2.08389	1.3767
Cell_0007	AMPKARt2	Insulin 10000 ng/ml	0.33518	0.555652	0.397254	0.512125	0.519595	0.561972	0.523485	0.412688	0.355679	0.535403	0.601663	0.512145	0.382752	0.420025	0.388684	0.670439	0.389142	0.542685	0.479737	0.236479	0.449037	0.425513	0.607525	0.596514	0.498432	0.452685	0.296519	0.405331	0.512588	0.405626	0.390129	0.601004	0.274786	0.562297	0.591013	0.486197	0.519472	0.468398	0.589472	0.601434	0.603327	0.326433	0.478433	0.696853	0.386815	0.389872	0.399622
Cell_0008	TFEB_TR	Insulin 10000 ng/ml	1.0187	1.70927	1.27728	2.04681	1.22931	0.552538	0.772531	1.39524	1.43911	2.22529	0.474358	2.64629	1.49011	2.72314	2.91253	0.868064	1.234	1.06442	2.03705	2.68848	1.8373	2.77616	1.07951	0.622359	1.0704	1.51833	1.21451	1.27946	1.33467	1.13529	2.05308	1.23542	0.865418	1.67305	1.51013	2.25312	1.68896	1.87358	2.96942	2.00536	1.96275	1.95162	1.46259	0.979033	3.09486	1.47251	1.69059
Cell_0008	FOXO_TR	Insulin 10000 ng/ml	0.757129	2.84061	2.65031	4.01277	3.62203	2.34293	2.58749	2.5022	2.68229	4.31526	1.38822	3.41578	2.23624	4.24985	4.06403	0.998653	2.87262	2.44438	3.61166	2.3659	3.14899	2.67064	3.27794	2.49047	3.31728	2.23251	2.02021	2.45276	4.1741	2.39105	2.89099	4.08772	1.89628	4.35499	3.50504	3.60291	3.39659	3.6085	2.48214	3.72521	4.01826	3.54206	4.3166	1.13322	4.29547	1.94813	1.65705
Cell_0008	AMPKARt2	Insulin 10000 ng/ml	0.352573	0.56478	0.392521	0.530793	0.515633	0.558435	0.523311	0.407925	0.339288	0.541987	0.60233	0.502896	0.398083	0.406755	0.406037	0.659858	0.455335	0.551997	0.460119	0.230865	0.467096	0.426193	0.614319	0.610795	0.512758	0.461914	0.28266	0.437681	0.455207	0.399892	0.400495	0.577335	0.280705	0.556984	0.598086	0.529399	0.535896	0.484488	0.598548	0.627785	0.58938	0.321467	0.490088	0.705101	0.404817	0.416067	0.376543
Cell_0009	TFEB_TR	Insulin 10000 ng/ml	1.10597	2.28824	1.2693	1.67536	1.31783	0.550839	0.842337	1.37246	1.25009	1.87005	0.485316	2.2433	1.47302	2.89405	2.82604	0.831755	1.07982	1.13212	2.0084	2.05674	2.04554	1.25505	2.20841	0.555244	1.09418	1.43629	1.37001	1.17346	1.60658	1.34844	1.6266	1.20923	0.807876	1.68341	1.51618	2.14899	1.89847	2.06424	3.66266	1.40006	1.74155	2.01896	1.6413	0.790153	2.80995	1.44622	1.79485
Cell_0009	FOXO_TR	Insulin 10000 ng/ml	0.717026	2.75793	2.8844	3.99329	3.47483	2.40615	2.5744	2.48118	3.00887	4.3955	1.49661	3.43916	2.06324	4.37202	3.87164	0.996746	2.46947	2.44773	3.61052	2.34593	0.932472	2.65788	3.62784	2.52909	3.44833	2.31597	1.82828	2.39882	4.52473	2.53413	2.94474	4.14472	1.8176	4.5191	3.46247	3.72025	3.4058	3.53853	2.69948	3.59243	3.74798	3.27037	4.30181	1.21186	4.29406	2.06735	1.67818
Cell_0009	AMPKARt2	Insulin 10000 ng/ml	0.356402	0.561638	0.38833	0.531224	0.494472	0.566702	0.513428	0.415489	0.36318	0.545009	0.584096	0.51534	0.388108	0.404862	0.394048	0.642333	0.485374	0.550359	0.472101	0.24055	0.436246	0.449081	0.622233	0.590194	0.505796	0.473876	0.27869	0.539164	0.400406	0.384844	0.383506	0.593204	0.248649	0.572841	0.594795	0.518402	0.535593	0.494416	0.626136	0.630018	0.542117	0.317853	0.518476	0.709183	0.450827	0.471545	0.342442
Cell_0010	TFEB_TR	Insulin 10000 ng/ml	1.23336	1.79708	1.26265	1.75685	1.38762	0.5548	0.926009	1.37991	1.08263	1.75258	0.502989	2.08849	1.47507	2.93319	2.47055	0.843916	1.33338	1.20901	2.03504	2.73142	1.96528	1.35323	1.79468	0.542856	1.11887	1.50958	1.53578	1.12843	2.60226	1.16971	1.8347	1.20758	0.843082	1.93522	1.33653	2.17656	1.72938	2.19087	1.84295	1.46852	2.48128	1.88909	1.3861	1.09288	2.58876	1.28304	1.80716
Cell_0010	FOXO_TR	Insulin 10000 ng/ml	0.725625	2.71419	2.71126	4.18324	3.65292	2.41476	2.8563	2.53711	2.9552	4.34708	1.6475	3.46474	1.8177	4.33928	3.78192	1.03321	2.683	2.46741	3.76282	2.34966	0.918699	2.53899	3.51115	2.58977	3.50008	2.37313	1.83914	2.52925	5.12458	2.34309	2.8648	3.84838	1.84797	4.6538	3.43553	3.93161	3.54958	3.87966	2.62225	3.43627	3.77269	3.37236	4.47525	1.20722	4.30049	2.11451	1.65144
Cell_0010	AMPKARt2	Insulin 10000 ng/ml	0.377348	0.566293	0.370522	0.557481	0.467578	0.571025	0.51469	0.390172	0.37875	0.533125	0.580652	0.538063	0.418335	0.397125	0.385386	0.608621	0.434923	0.542197	0.459994	0.248977	0.46384	0.463215	0.613062	0.560007	0.520474	0.472684	0.288947	0.583862	0.407055	0.381713	0.420463	0.598625	0.24191	0.57513	0.575132	0.542535	0.527834	0.52588	0.623279	0.616424	0.526912	0.29406	0.495535	0.68645	0.513998	0.53004	0.31976
Cell_0011	TFEB_TR	Insulin 10000 ng/ml	1.1757	1.4001	1.02036	1.53099	1.45201	0.555205	0.930333	1.36893	1.87215	1.70843	0.51311	2.47297	1.51669	3.15924	2.46562	0.885846	1.17402	1.23639	1.96346	1.50463	2.13901	1.5809	2.83838	0.574748	1.0685	0.451247	1.82444	1.06949	2.07316	1.24786	1.88166	1.14234	0.577992	1.95616	1.33868	1.71261	1.44797	1.94314	1.01235	1.46819	1.70815	2.06978	1.09883	0.887837	2.35886	1.30037	1.97355
Cell_0011	FOXO_TR	Insulin 10000 ng/ml	0.794392	2.74518	2.56648	3.96405	3.66399	2.3377	2.98403	2.53618	2.85315	4.41175	1.75501	3.50997	1.68127	4.52909	3.62107	1.1096	2.51253	2.55541	3.69658	2.34397	0.899771	2.69387	3.67929	2.6521	3.14306	1.50727	2.12238	2.35274	4.045	2.45995	2.79953	4.0724	1.83413	4.97975	3.43609	2.59887	3.41234	3.97913	2.76838	3.5693	3.59435	3.48041	4.49481	1.28847	4.32153	2.24135	1.62281
Cell_0011	AMPKARt2	Insulin 10000 ng/ml	0.37719	0.569599	0.366941	0.535458	0.446284	0.581386	0.55144	0.404497	0.37011	0.488692	0.589999	0.550836	0.415117	0.413527	0.37768	0.65536	0.42738	0.534674	0.466807	0.245652	0.466425	0.477906	0.586457	0.559207	0.513792	0.680349	0.257874	0.581728	0.376135	0.368952	0.412423	0.580824	0.26954	0.560833	0.55843	0.461699	0.539764	0.521745	0.661709	0.612219	0.476525	0.310158	0.493024	0.684236	0.458015	0.563694	0.327675
Cell_0012	TFEB_TR	Insulin 10000 ng/ml	1.05341	1.65733	1.30571	1.69861	1.50494	0.557177	0.862801	1.35711	1.68001	2.77855	0.516995	2.20052	1.5249	3.06427	2.64798	0.912329	1.45867	1.25621	1.93914	1.4894	2.37399	1.56449	2.9979	0.594916	1.08451	0.446985	1.23464	0.934332	2.04322	1.24497	1.6261	1.33312	0.763544	1.8739	1.41378	1.72546	1.71801	1.77923	1.96642	1.28648	4.02956	2.12821	1.18465	1.02015	2.08007	1.52465	1.90841
Cell_0012	FOXO_TR	Insulin 10000 ng/ml	0.775077	2.63377	2.92986	4.07074	3.42505	2.55031	3.07471	2.49003	2.73942	4.24151	1.77808	3.20867	1.56811	4.38137	3.79951	1.18699	2.99931	2.63662	3.56349	2.44781	0.913673	2.63562	3.60563	2.65883	3.32588	1.44993	1.73048	2.2537	4.07279	2.52043	2.75672	4.16115	1.82273	5.00227	3.35228	3.64313	3.54549	3.67338	2.82069	3.38872	3.67727	3.63908	4.15	1.32811	4.20708	2.31583	1.67542
Cell_0012	AMPKARt2	Insulin 10000 ng/ml	0.360335	0.569983	0.371747	0.535056	0.44704	0.593704	0.555546	0.389494	0.377143	0.471429	0.604698	0.576129	0.410216	0.402545	0.376414	0.643469	0.381389	0.545278	0.445136	0.252364	0.438928	0.513821	0.569016	0.539352	0.540551	0.677703	0.261717	0.56087	0.545879	0.374158	0.4257	0.590558	0.264587	0.52221	0.542847	0.539003	0.53108	0.512264	0.576676	0.639416	0.478813	0.297894	0.507128	0.712488	0.493229	0.561644	0.317645
Cell_0013	TFEB_TR	Insulin 10000 ng/ml	1.32086	1.51789	1.53461	1.96182	1.54364	0.54676	0.773219	1.38243	1.43516	2.51638	0.539021	2.18969	1.47198	3.07007	2.78879	0.96525	1.16423	1.21084	1.80263	1.80344	2.2343	1.27326	2.47243	0.606037	1.02625	0.431024	1.68885	0.897278	2.18298	1.29525	0.672383	1.57224	0.742542	1.87408	1.48372	1.04752	1.83349	1.99105	2.16237	1.29501	1.39323	2.05597	1.24041	0.939295	2.23838	1.22735	2.09286
Cell_0013	FOXO_TR	Insulin 10000 ng/ml	0.866177	2.71671	2.95674	4.0438	3.40082	2.4493	3.30168	2.47142	2.82104	4.06393	1.92552	3.36814	1.29533	4.44628	4.04421	1.25713	2.8089	2.70675	3.55858	2.45138	0.944165	2.58729	3.86118	2.76253	3.27945	1.45941	1.92593	2.18576	4.29937	2.52446	1.01775	4.45046	1.83121	4.4345	3.37376	3.05063	3.41275	3.86631	2.93992	3.36835	3.97594	3.36033	3.90499	1.38882	4.50555	2.38479	1.47346
Cell_0013	AMPKARt2	Insulin 10000 ng/ml	0.379664	0.569356	0.372092	0.535009	0.425826	0.582261	0.572464	0.386791	0.369517	0.469429	0.603403	0.539792	0.40926	0.420275	0.345285	0.663337	0.394914	0.518332	0.465029	0.249483	0.449289	0.565151	0.552167	0.530487	0.5524	0.670301	0.258299	0.554457	0.412762	0.381071	0.591117	0.596295	0.281729	0.49255	0.52248	0.609742	0.536502	0.492144	0.514372	0.574408	0.443104	0.309856	0.514509	0.691497	0.457616	0.549694	0.297256
Cell_0014	TFEB_TR	Insulin 10000 ng/ml	1.44861	1.57002	1.49448	1.69065	1.59007	0.557612	0.77872	1.38275	1.89756	2.27726	0.566597	2.12471	1.47672	2.87616	2.9693	0.912584	1.2011	1.27246	1.80762	1.1473	2.13507	1.58758	1.66989	0.624593	0.964948	0.437521	1.85534	0.932789	2.26937	1.02602	0.6502	1.50373	0.721539	1.97537	1.50089	1.81812	1.81515	1.86662	4.69869	1.61253	3.57338	2.1961	1.1633	1.00392	2.08305	1.52236	1.93365
Cell_0014	FOXO_TR	Insulin 10000 ng/ml	1.04673	2.7438	3.20361	4.15363	3.42655	2.58947	3.31013	2.47667	2.6858	4.2365	2.00048	3.04015	1.26354	4.05969	4.49827	1.16651	2.8111	2.81834	3.60617	2.16923	0.957335	2.65378	3.83013	2.90554	3.21288	1.48897	1.62371	2.24678	4.30438	2.29246	0.96718	4.34187	1.83969	4.72309	3.37529	3.63908	3.50133	3.87524	2.68201	3.46811	3.72629	3.23185	4.22613	2.38559	4.3942	2.50943	1.66044
Cell_0014	AMPKARt2	Insulin 10000 ng/ml	0.343266	0.582176	0.371038	0.52773	0.437394	0.575979	0.543451	0.372705	0.396185	0.456034	0.595061	0.517612	0.405614	0.420411	0.353973	0.660735	0.355781	0.524463	0.444739	0.243637	0.435824	0.569916	0.565862	0.514706	0.557038	0.629895	0.170354	0.544654	0.373555	0.420661	0.631253	0.589435	0.298871	0.452226	0.505712	0.560227	0.532103	0.463643	0.542234	0.581207	0.432995	0.294368	0.505797	0.586902	0.464445	0.561106	0.282799
Cell_0015	TFEB_TR	Insulin 10000 ng/ml	1.74807	1.51495	1.60671	1.73564	1.58751	0.549794	0.82085	1.4078	1.81042	3.21486	0.53636	2.01455	1.50374	2.68739	3.08394	0.967325	1.20704	1.27975	1.84303	2.10708	2.11371	1.036	2.31734	0.658103	0.964359	0.450642	1.39214	0.922934	2.62221	0.965761	0.729882	1.7084	0.86104	2.07913	1.49728	0.660071	1.80733	1.92654	2.28507	1.27666	3.3152	2.30476	1.01514	1.2889	2.00326	1.56747	2.18432
Cell_0015	FOXO_TR	Insulin 10000 ng/ml	1.39697	2.60192	3.1595	3.93438	3.48592	2.52659	3.24768	2.46203	2.88493	4.57211	1.79065	3.11518	1.24832	3.84756	4.26373	1.28751	3.01764	2.55737	3.69742	2.23246	0.959024	2.5672	4.01453	2.95467	3.57582	1.53222	1.69248	2.14502	4.80106	2.33132	0.955278	4.09918	1.81658	4.9303	3.02828	1.40454	3.46534	3.6312	2.91131	3.34581	3.65087	3.08389	4.68202	2.77072	4.37349	2.29085	1.45123
Cell_0015	AMPKARt2	Insulin 10000 ng/ml	0.3151	0.571691	0.377071	0.539069	0.437722	0.57907	0.510151	0.362773	0.380664	0.420901	0.610317	0.496674	0.395587	0.4181	0.352061	0.641916	0.324998	0.510115	0.454977	0.245164	0.449335	0.567519	0.536634	0.548161	0.54428	0.677801	0.249835	0.520848	0.368721	0.461919	0.619098	0.566843	0.365766	0.465047	0.49848	0.516346	0.49962	0.464153	0.51368	0.571939	0.418136	0.296799	0.498841	0.520137	0.466883	0.555399	0.299144
Cell_0016	TFEB_TR	Insulin 10000 ng/ml	1.40272	2.39917	1.90951	1.84769	1.50795	0.577921	0.889886	1.42698	1.28185	3.66837	0.573436	2.40341	1.52265	2.46204	3.07618	0.971202	1.12169	1.28216	1.83961	2.30848	2.07851	1.28553	2.88577	0.687839	0.895167	0.453476	1.57059	1.00588	2.56963	1.01327	0.65071	1.62019	0.915232	2.1388	1.56979	0.606333	2.05093	2.00979	1.56531	1.30089	4.04017	2.32644	1.55134	1.33659	2.0258	1.32831	2.11991
Cell_0016	FOXO_TR	Insulin 10000 ng/ml	1.3946	2.94606	3.02072	3.80264	3.26563	2.62417	3.15188	2.4961	2.99206	4.76744	1.94397	3.27833	1.25996	3.4995	4.33175	1.33998	2.8859	2.64613	3.73209	2.45167	0.926715	2.60833	3.96806	3.07449	3.35806	1.53244	1.77336	2.20732	4.65005	2.47914	0.937536	4.12008	1.99245	4.54622	3.11915	1.22158	3.72963	3.806	2.81179	3.2461	3.94176	3.10438	4.36994	2.86581	4.29505	2.21275	1.50805
Cell_0016	AMPKARt2	Insulin 10000 ng/ml	0.267342	0.599649	0.37905	0.533971	0.439253	0.58577	0.510533	0.377193	0.378389	0.412013	0.589551	0.505533	0.399838	0.42041	0.350128	0.653418	0.287636	0.517115	0.444202	0.26773	0.450972	0.530428	0.530581	0.503324	0.542586	0.682061	0.251627	0.504843	0.365712	0.429473	0.62561	0.564683	0.392614	0.409943	0.498956	0.523923	0.520412	0.445421	0.515669	0.552586	0.407687	0.335391	0.500061	0.491122	0.454865	0.546843	0.307958
Cell_0017	TFEB_TR	Insulin 10000 ng/ml	1.48031	1.80947	2.09824	1.86123	1.56362	0.613984	0.962066	1.37062	1.4217	2.14507	0.572437	3.08539	1.58966	2.3969	3.44905	1.00227	1.21548	1.26056	1.82891	1.76501	2.0261	1.56117	2.648	0.695741	0.903563	0.46559	1.25533	1.01714	2.1389	1.08249	0.679294	1.54357	1.0291	2.23837	1.59252	0.571128	1.97239	2.03978	1.98321	1.15984	0.549373	2.39388	1.33762	1.33229	2.24333	1.46629	1.96543
Cell_0017	FOXO_TR	Insulin 10000 ng/ml	1.46837	2.85304	2.87914	3.84228	3.5104	2.9098	3.43664	2.4286	3.01646	4.52809	2.06632	3.30432	1.29291	3.2924	4.72419	1.43694	2.74121	2.71133	3.79126	2.36038	0.918515	2.67571	3.69362	2.95464	3.38188	1.62652	1.43003	2.24269	4.34943	2.26409	0.960147	4.29345	2.10484	4.65906	2.97516	1.07159	3.56122	3.78996	3.05282	3.15544	2.18582	2.93164	4.71924	2.89518	4.33188	2.3274	1.77643
Cell_0017	AMPKARt2	Insulin 10000 ng/ml	0.271781	0.595828	0.410793	0.515322	0.473092	0.569633	0.513967	0.373928	0.364013	0.398972	0.593862	0.513306	0.397045	0.444498	0.311919	0.639892	0.301468	0.518935	0.431861	0.299824	0.445492	0.501905	0.523051	0.488397	0.549508	0.64333	0.271505	0.486177	0.359914	0.414132	0.610468	0.520765	0.401083	0.410988	0.497556	0.512698	0.525989	0.456025	0.510448	0.556624	0.639716	0.356951	0.500901	0.466033	0.451831	0.535518	0.280146
Cell_0018	TFEB_TR	Insulin 10000 ng/ml	1.35655	2.01776	1.67626	1.79028	1.52106	0.621288	1.01107	1.3773	1.53424	2.67051	0.582182	2.51285	1.59389	2.5071	3.50651	1.05149	1.09643	1.22401	1.81311	1.25281	2.24849	3.38559	3.23117	0.700851	0.955125	0.483008	1.33432	1.02193	2.44179	1.11768	0.598845	1.67477	0.949713	2.28148	1.55749	0.565093	2.14302	1.91099	1.46512	1.48205	0.529927	2.48261	1.16635	1.64511	2.32084	1.31077	2.14735
Cell_0018	FOXO_TR	Insulin 10000 ng/ml	1.34166	2.96521	2.92851	3.75371	3.6734	3.11526	3.51019	2.48748	3.033	4.54391	2.03101	3.4701	1.18343	3.46343	4.98953	1.58794	2.62048	2.585	3.81684	2.15933	0.921346	2.67485	3.40976	2.7652	3.48775	1.67768	1.79939	2.26507	3.95135	2.58125	0.972184	4.34478	2.07893	4.31961	3.02722	1.12138	3.61454	3.57883	3.01607	3.15407	2.12832	3.01923	4.74896	3.04686	4.4927	2.43183	1.41866
Cell_0018	AMPKARt2	Insulin 10000 ng/ml	0.285886	0.589876	0.438314	0.511377	0.510806	0.576438	0.481152	0.393368	0.353221	0.366967	0.589878	0.519727	0.375026	0.430272	0.312645	0.651071	0.309047	0.505929	0.440353	0.296441	0.451559	0.480018	0.506412	0.519972	0.541992	0.659033	0.289444	0.47102	0.339634	0.379219	0.626366	0.494131	0.434957	0.40055	0.493591	0.52916	0.520572	0.445644	0.496363	0.571015	0.604504	0.366932	0.514759	0.499452	0.461619	0.510189	0.321618
Cell_0019	TFEB_TR	Insulin 10000 ng/ml	1.37156	2.31304	1.67603	1.60427	1.34999	0.645427	0.83908	1.33434	1.84602	3.46408	0.584487	3.31006	1.60108	2.51782	3.34188	1.04816	1.49928	1.22647	1.87948	1.30741	2.03399	1.32873	2.47955	0.706496	1.0277	0.491185	1.34181	1.01469	2.43973	1.13783	0.654352	1.58503	1.08404	2.3877	1.53248	0.593447	2.14964	2.20622	1.53502	1.44298	0.548774	2.49609	1.19129	2.14076	2.15548	0.585086	2.30414
Cell_0019	FOXO_TR	Insulin 10000 ng/ml	1.42425	3.02174	2.62578	3.86298	3.55765	3.25955	3.48627	2.37499	3.18055	4.4888	1.95114	3.47139	1.43358	3.57114	4.6771	1.61219	2.41863	2.32862	3.83013	2.35743	0.931884	2.74639	3.82283	2.59594	3.59515	1.76722	1.5441	2.19587	3.99575	2.69428	0.901479	4.53581	2.3124	4.33228	3.12496	1.20665	3.60028	3.65976	3.05865	3.16385	2.20078	2.91272	4.3862	3.14157	4.41944	3.42337	1.53499
Cell_0019	AMPKARt2	Insulin 10000 ng/ml	0.287777	0.587507	0.459752	0.501847	0.536688	0.568512	0.519615	0.371046	0.368722	0.36137	0.597171	0.489036	0.383102	0.435649	0.317989	0.62875	0.306044	0.515048	0.445155	0.296372	0.457922	0.467534	0.514256	0.486803	0.535815	0.657319	0.23385	0.476355	0.35171	0.38463	0.626719	0.467766	0.447866	0.396911	0.491173	0.516491	0.544862	0.438769	0.488702	0.585117	0.60347	0.373991	0.478582	0.493462	0.463692	0.641677	0.301556
Cell_0020	TFEB_TR	Insulin 10000 ng/ml	1.65149	2.04807	2.07374	1.78289	1.26585	0.709232	1.07254	1.29391	2.37023	2.74994	0.628332	2.68228	1.5395	2.25157	3.12537	1.07992	1.17979	1.16823	1.88547	1.52571	2.06977	1.41191	3.6434	0.695093	1.09487	0.490778	1.7955	1.05159	2.34085	1.0552	0.667449	1.79875	1.27287	2.63318	1.50609	0.585791	1.95454	1.82714	1.60492	1.1868	0.570775	2.26158	1.21526	2.38244	1.978	0.486395	1.88319
Cell_0020	FOXO_TR	Insulin 10000 ng/ml	1.57379	3.0284	2.49578	3.74025	3.57352	3.00171	3.58333	2.38992	3.13458	4.3574	2.06784	3.57801	1.44146	3.16198	4.16268	1.71579	2.35211	2.31646	3.67848	2.27527	0.946112	2.9488	3.81403	2.50642	3.64407	1.81822	1.74334	2.34574	4.20062	2.62016	0.921595	4.61541	2.27074	4.43144	2.97862	1.19203	3.59842	3.47599	3.10123	2.99351	2.32837	2.63839	4.23696	3.11255	4.31296	3.43107	1.39199
Cell_0020	AMPKARt2	Insulin 10000 ng/ml	0.278992	0.592397	0.460532	0.509621	0.541144	0.574771	0.474349	0.372948	0.349759	0.404289	0.595866	0.46659	0.39831	0.458698	0.323895	0.646105	0.314742	0.492858	0.435817	0.28523	0.473133	0.451312	0.506202	0.519733	0.530893	0.646352	0.275886	0.474112	0.390713	0.39959	0.626398	0.473514	0.414477	0.407573	0.511734	0.517988	0.562142	0.428233	0.481041	0.591275	0.604525	0.36002	0.495632	0.506421	0.48589	0.659543	0.359862
Cell_0021	TFEB_TR	Insulin 10000 ng/ml	1.77683	1.27557	1.59728	1.61173	1.23951	0.724093	1.11163	1.29869	2.96232	3.53101	0.634938	3.53757	1.5055	2.29682	3.19214	1.06401	1.48738	1.18045	1.84859	1.68405	1.94286	1.24849	2.66993	0.67679	1.14471	0.489611	1.28043	1.07041	2.18765	1.10834	0.611979	1.63264	0.767942	2.91172	1.34735	0.593249	1.82942	1.70093	0.758839	1.15181	0.593832	2.34901	1.35017	2.39494	2.07777	0.538455	1.89964
Cell_0021	FOXO_TR	Insulin 10000 ng/ml	1.73417	3.03331	2.24616	3.98273	3.59674	2.8921	3.38968	2.41612	3.19305	4.36566	2.24436	3.59635	1.44206	3.2795	4.51826	1.77045	2.33452	2.52482	3.67512	2.3299	0.958586	2.91042	3.23104	2.42402	3.55572	1.79714	1.70874	1.99387	3.98131	2.13287	0.961949	4.66388	2.28197	4.99035	2.79745	1.16413	3.57446	3.36269	3.25524	3.10267	2.36277	2.87319	4.02685	3.18848	4.23616	3.49847	1.39399
Cell_0021	AMPKARt2	Insulin 10000 ng/ml	0.23083	0.573595	0.470321	0.523567	0.528457	0.572424	0.48537	0.390752	0.38121	0.492955	0.607841	0.435663	0.410263	0.455026	0.345653	0.626055	0.31409	0.514383	0.45324	0.285964	0.498274	0.461315	0.512907	0.520202	0.524725	0.676179	0.337058	0.401271	0.375275	0.37406	0.621176	0.476028	0.41106	0.40557	0.534098	0.537548	0.559605	0.425207	0.458789	0.614035	0.608331	0.36522	0.508209	0.531278	0.505971	0.661352	0.360657
Cell_0022	TFEB_TR	Insulin 10000 ng/ml	1.49822	1.8959	1.57584	1.96655	1.20235	0.767403	1.10089	1.3175	4.21043	2.60819	0.606402	2.84488	1.50582	2.30708	3.32543	1.08806	1.60954	1.15825	1.68871	1.45541	1.97618	1.25012	1.57412	0.709133	1.17854	0.478832	1.03973	1.10248	2.22656	1.0733	0.697478	2.05816	0.741415	2.86558	1.30675	0.636479	2.07963	1.89376	0.703597	1.22331	0.578094	2.36376	1.51232	2.4555	2.08967	0.590514	1.98456
Cell_0022	FOXO_TR	Insulin 10000 ng/ml	1.85621	2.95474	2.27253	3.78965	3.5495	2.87825	3.46433	2.4131	3.16326	4.26593	2.13871	3.59131	1.62281	3.50548	4.63744	1.84526	2.86515	2.62654	3.35952	2.24705	0.953168	3.00747	3.58337	2.65453	3.3431	1.74668	1.46738	2.09528	4.2584	1.93939	1.06508	4.55633	2.13307	4.70931	2.787	1.21291	3.70163	3.37572	3.2277	3.15605	2.29013	2.95555	4.29345	3.25349	4.37277	3.56587	1.76553
Cell_0022	AMPKARt2	Insulin 10000 ng/ml	0.228891	0.55485	0.475939	0.524908	0.503318	0.580046	0.483125	0.371079	0.36194	0.523387	0.588428	0.438917	0.397953	0.458257	0.386797	0.633604	0.32156	0.505222	0.452287	0.276876	0.491843	0.448585	0.485495	0.515324	0.522932	0.64541	0.331554	0.411161	0.391665	0.359843	0.587313	0.521077	0.361803	0.40131	0.593312	0.540923	0.559586	0.440375	0.444594	0.618729	0.581197	0.34794	0.475814	0.540504	0.504486	0.663161	0.284397
Cell_0023	TFEB_TR	Insulin 10000 ng/ml	1.57087	1.54737	2.05808	1.89298	1.21085	0.79097	1.14743	1.33144	1.23955	1.75624	0.633445	2.86537	1.4846	2.13149	2.85985	1.17015	1.3819	1.15811	1.72917	1.76439	1.79313	2.46301	1.63304	0.695229	1.24331	0.477253	1.40732	1.13456	2.11372	0.951535	0.740033	1.59343	0.924671	2.99945	1.26473	0.603503	2.11145	1.69961	0.680632	1.20745	0.590927	2.46457	1.42663	2.72416	2.02745	0.582683	1.9511
Cell_0023	FOXO_TR	Insulin 10000 ng/ml	2.02623	3.10061	2.58308	3.86639	3.44755	3.46609	3.51102	2.41716	3.42764	4.43259	2.18785	3.73721	1.42915	3.12663	5.0651	1.92626	2.57918	2.62411	3.82114	2.25888	0.932645	3.0083	3.3204	2.47324	3.68014	1.74876	1.74575	2.19669	4.14648	2.10021	0.99988	4.70841	2.00846	5.20656	2.88276	1.23874	3.76275	3.39846	3.22101	3.48477	2.32409	2.84569	3.92525	3.06661	4.36367	3.57352	1.54981
Cell_0023	AMPKARt2	Insulin 10000 ng/ml	0.231764	0.559003	0.483312	0.532008	0.493253	0.555799	0.507176	0.37703	0.374248	0.549566	0.601099	0.434807	0.39743	0.43357	0.418487	0.630533	0.296279	0.511837	0.452699	0.263463	0.484126	0.472742	0.512719	0.559041	0.527456	0.647688	0.316823	0.42105	0.414522	0.369218	0.597022	0.622475	0.348532	0.384885	0.653019	0.508162	0.535965	0.451019	0.445269	0.584958	0.582249	0.323052	0.496032	0.595717	0.493582	0.627711	0.289101
Cell_0024	TFEB_TR	Insulin 10000 ng/ml	1.55894	1.63729	1.47466	2.07561	1.30517	0.891942	1.16046	1.32159	2.13277	1.45085	0.670052	3.14513	1.52684	2.082	2.77445	1.14088	2.37109	1.14068	1.65967	1.97247	1.83733	1.34976	2.34015	0.690734	1.21562	0.490249	1.28912	1.1841	2.1466	1.10102	0.583226	1.6835	0.841856	3.01891	1.04945	0.549928	2.0823	1.84142	0.607053	1.29135	0.60771	2.30277	1.4546	2.23057	2.04235	0.640961	1.89898
Cell_0024	FOXO_TR	Insulin 10000 ng/ml	1.93566	3.1387	2.59453	3.79024	3.43721	3.4553	3.24443	2.42683	3.41357	4.72248	2.16322	3.7178	1.61568	2.99264	4.57717	1.97985	3.06205	2.79312	3.57108	2.24957	0.92919	3.26245	3.39999	2.34997	3.58673	1.89681	1.76972	2.22384	4.55435	2.04947	0.967401	4.74787	2.11437	5.38134	3.3072	1.23478	3.85448	3.27665	3.31681	3.90577	2.27159	2.85815	4.16078	3.0072	4.19214	3.51287	1.53298
Cell_0024	AMPKARt2	Insulin 10000 ng/ml	0.219406	0.539444	0.50705	0.515436	0.470996	0.559925	0.496338	0.388089	0.368592	0.56427	0.629038	0.448835	0.40762	0.438332	0.412507	0.624747	0.254432	0.508475	0.444174	0.225175	0.489317	0.495215	0.532551	0.545577	0.52989	0.658708	0.301558	0.42335	0.393093	0.338989	0.591467	0.662816	0.331471	0.399995	0.670346	0.529615	0.530097	0.440721	0.435569	0.556035	0.580968	0.31352	0.486922	0.606087	0.506251	0.662763	0.311991
Cell_0025	TFEB_TR	Insulin 10000 ng/ml	1.74685	1.72906	1.33165	1.86498	1.33008	0.867598	1.18443	1.33498	2.01491	1.95064	0.777546	4.05376	1.51826	2.06193	3.17669	1.11779	3.40521	1.17943	1.63776	1.58768	1.79617	2.09	1.81132	0.69359	1.17401	0.507957	1.33893	1.1872	2.16709	1.17277	0.607599	1.61216	0.808031	2.73867	0.952052	0.619568	1.94619	1.51518	0.768617	1.56917	0.615261	2.36688	1.59705	2.45193	2.03668	0.660706	1.8278
Cell_0025	FOXO_TR	Insulin 10000 ng/ml	2.00752	2.92858	2.70137	3.7901	3.36677	3.64047	3.09502	2.46584	3.32823	4.65491	3.03004	3.60847	1.9472	3.02378	5.01717	2.01959	3.34269	2.77662	3.62562	2.2695	0.941713	2.94809	3.27693	2.48706	3.32308	1.85057	1.65494	2.15111	4.60225	2.11712	1.00904	4.97435	2.08978	4.70649	3.16509	1.43807	3.80633	3.12337	3.1617	4.04312	2.24689	3.06396	4.18461	3.29723	4.30218	3.61458	1.41823
Cell_0025	AMPKARt2	Insulin 10000 ng/ml	0.233549	0.539326	0.501828	0.496391	0.470981	0.556464	0.494698	0.352839	0.359012	0.539541	0.607629	0.445901	0.403804	0.427682	0.471531	0.625377	0.301402	0.50044	0.441388	0.257117	0.471069	0.478454	0.522097	0.527544	0.538202	0.65382	0.318957	0.446398	0.423939	0.360755	0.597598	0.64042	0.328932	0.382101	0.678144	0.531885	0.525511	0.446426	0.443775	0.549121	0.604742	0.316269	0.512985	0.610568	0.483927	0.646081	0.31644
Cell_0026	TFEB_TR	Insulin 10000 ng/ml	1.82002	1.85004	0.494394	2.34941	1.41117	0.881493	1.13251	1.32042	1.96687	1.70781	0.929227	3.76528	1.49941	2.09229	2.91327	0.948793	2.13725	1.08543	1.58205	1.67092	1.90007	1.28563	1.98137	0.73117	1.19919	0.492377	1.7115	1.22747	2.1135	1.32188	0.655153	1.91424	0.930563	2.5643	0.931819	0.663312	2.0484	2.22064	0.654539	1.57368	0.615664	2.42421	1.53781	2.36906	1.84874	0.618413	2.24658
Cell_0026	FOXO_TR	Insulin 10000 ng/ml	2.10589	3.13976	2.30599	3.71617	3.44694	3.35629	2.87003	2.43126	3.64743	4.37958	3.12606	3.54052	1.82479	3.12951	5.19634	2.33939	3.22303	2.87371	3.50003	2.35963	0.96521	3.03786	3.25149	2.59989	3.46176	1.88237	1.76818	2.26185	4.10915	2.01456	1.07355	5.42542	2.10968	4.51109	3.27095	1.48963	3.81758	3.41103	3.04247	3.9925	2.25541	2.97174	3.93757	3.07502	4.04362	3.78384	1.82678
Cell_0026	AMPKARt2	Insulin 10000 ng/ml	0.211819	0.534002	0.620803	0.495101	0.464177	0.525214	0.467773	0.360559	0.404422	0.54029	0.632429	0.432803	0.389539	0.424651	0.45801	0.640107	0.334436	0.516716	0.449975	0.249373	0.501588	0.45714	0.534847	0.541267	0.535908	0.66166	0.311628	0.420389	0.412866	0.342902	0.595684	0.638719	0.312674	0.393621	0.670251	0.525966	0.531658	0.4557	0.439137	0.566305	0.610406	0.32325	0.508363	0.603076	0.481974	0.648019	0.295728
Cell_0027	TFEB_TR	Insulin 10000 ng/ml	1.78268	2.7935	0.472088	1.8089	1.40802	0.95867	1.20356	1.30908	0.986389	2.09057	0.961597	5.21139	1.58401	2.1473	2.52062	1.34541	2.28768	1.15916	1.58849	1.71991	2.00833	0.994571	1.85088	0.718902	1.20899	0.500741	1.37175	1.18996	2.1773	1.07568	0.779435	1.77419	0.748397	2.49002	0.920047	0.665645	2.10658	1.79546	0.580616	1.60909	0.602069	2.63829	1.84912	2.20616	1.89267	0.502423	1.85016
Cell_0027	FOXO_TR	Insulin 10000 ng/ml	2.26341	3.12692	2.4713	4.00517	3.29989	3.24396	3.05642	2.35346	3.23747	4.56656	3.28258	3.54786	1.81436	3.1784	5.36989	3.18213	3.22474	2.5888	3.69336	2.60322	0.989422	2.90245	3.08849	2.73523	3.42126	1.85631	2.07892	2.22081	4.3014	1.78428	1.15685	5.41369	2.06769	4.82869	3.2414	1.45409	3.78044	3.13626	3.32902	4.39199	2.30312	3.06845	3.86731	3.01483	4.22508	3.55037	1.71958
Cell_0027	AMPKARt2	Insulin 10000 ng/ml	0.209124	0.530373	0.581874	0.505598	0.464283	0.512773	0.469071	0.374241	0.394814	0.504907	0.593352	0.438397	0.396298	0.412174	0.496219	0.577892	0.406234	0.501713	0.43704	0.256593	0.489653	0.459184	0.552123	0.557084	0.522433	0.641622	0.319864	0.405683	0.398335	0.337903	0.531355	0.639205	0.26544	0.406366	0.661698	0.494419	0.541616	0.480375	0.433574	0.537443	0.583728	0.330955	0.49821	0.607452	0.475392	0.661001	0.314157
Cell_0028	TFEB_TR	Insulin 10000 ng/ml	1.42932	1.75126	0.456464	2.3962	1.47534	1.02653	1.27353	0.476024	2.04034	1.97152	1.00019	4.56709	1.59795	2.08146	2.77324	1.56379	3.5254	1.19974	1.6326	2.05808	1.61728	1.22556	2.23823	0.712166	1.20905	0.516913	1.61778	1.3572	2.0935	1.28776	0.658223	1.80832	0.984841	2.23874	0.93922	0.734287	1.96829	1.72208	0.797798	1.42507	0.609831	2.51147	1.9254	2.18864	1.76898	0.582522	1.9651
Cell_0028	FOXO_TR	Insulin 10000 ng/ml	2.25311	3.08506	2.46479	3.95307	3.38276	3.26747	3.13474	1.25455	3.43347	4.41979	3.4721	3.72047	1.68135	3.09473	4.9133	3.42045	3.28356	2.58045	3.72671	2.40046	0.953648	2.72578	3.14631	2.65273	3.29866	1.9799	1.95976	2.75232	3.83602	2.23253	1.06805	5.27257	2.07135	4.30279	3.27339	1.57502	3.70733	3.19693	3.36915	4.01307	2.35688	3.017	3.95668	2.97538	4.14547	3.53373	1.54448
Cell_0028	AMPKARt2	Insulin 10000 ng/ml	0.237224	0.531237	0.601198	0.478694	0.455418	0.513023	0.459304	0.592662	0.381343	0.458709	0.547314	0.437824	0.402207	0.399389	0.471879	0.539784	0.397087	0.491382	0.415004	0.417619	0.491936	0.448818	0.530895	0.55915	0.506016	0.653443	0.3222	0.398361	0.385936	0.354179	0.553683	0.621323	0.262737	0.408485	0.626385	0.550161	0.533695	0.477808	0.42733	0.554825	0.601294	0.324199	0.497551	0.613355	0.470819	0.675325	0.337432
Cell_0029	TFEB_TR	Insulin 10000 ng/ml	1.6733	1.91088	0.450299	1.9851	1.48562	1.07547	1.20231	0.462803	2.17277	4.04865	1.0611	6.08816	1.6136	1.94254	2.45351	1.84553	2.99238	1.28245	1.7162	1.74739	1.95788	1.9538	1.57304	0.724323	1.21485	0.53375	1.9148	1.26267	2.02785	1.21899	0.589522	1.96475	1.01179	2.48433	0.988212	0.69409	1.93211	1.55492	0.63019	1.92365	0.629342	2.48273	1.73955	2.3865	1.99484	0.564303	2.25918
Cell_0029	FOXO_TR	Insulin 10000 ng/ml	2.15129	3.16838	3.29218	4.00108	3.29643	3.25634	2.93563	1.205	3.36236	4.61842	3.4828	3.74208	1.54678	2.84025	4.84638	3.30538	3.40458	2.55138	4.12239	2.37437	3.15959	2.83449	3.10867	2.53782	3.19662	2.01238	1.91406	2.37526	3.69053	2.19349	0.99565	5.06083	2.15278	4.87178	3.00322	1.76957	3.80467	3.16421	3.25084	3.6195	2.46552	3.0315	3.68104	3.0017	4.27175	3.51496	1.67017
Cell_0029	AMPKARt2	Insulin 10000 ng/ml	0.23266	0.518937	0.624611	0.467648	0.456878	0.504211	0.506167	0.604055	0.344958	0.430041	0.526328	0.459482	0.39303	0.391193	0.467117	0.481742	0.378142	0.44149	0.408088	0.461548	0.521304	0.439893	0.53104	0.527453	0.518653	0.63387	0.321331	0.404355	0.380599	0.383276	0.543752	0.617484	0.265232	0.415973	0.611902	0.476592	0.546398	0.479606	0.418148	0.541185	0.590714	0.301767	0.48752	0.595887	0.48277	0.657726	0.322769
Cell_0030	TFEB_TR	Insulin 10000 ng/ml	1.97647	2.03177	0.447832	1.91593	1.51078	1.19666	1.09314	0.491593	2.00388	2.76023	1.12751	3.66408	1.22244	2.12346	2.75895	2.11021	2.29064	1.26857	1.76862	2.27068	2.37298	1.48949	2.18371	0.757033	1.23461	0.580828	2.24287	1.35591	2.04216	1.21053	0.58417	2.22473	0.891128	2.4266	1.12107	0.713213	1.83337	1.76327	0.812361	1.76468	0.648852	3.22132	1.97387	1.85418	1.95265	0.584834	1.95537
Cell_0030	FOXO_TR	Insulin 10000 ng/ml	2.22253	3.14845	2.73698	4.16491	3.25301	3.1471	2.8953	1.19676	3.31621	4.49842	3.53198	3.72125	1.9454	3.19227	4.59874	3.50205	3.48203	2.62893	4.08486	2.3427	3.41919	2.89259	2.97507	2.63027	3.1646	2.02547	1.88559	2.53925	3.77278	2.59596	0.925871	5.37641	2.26943	4.58339	3.18955	1.77529	3.60979	3.22839	3.01427	3.83736	2.57416	3.16974	3.57747	3.10029	4.19043	3.3604	1.72001
Cell_0030	AMPKARt2	Insulin 10000 ng/ml	0.250405	0.516177	0.60553	0.46779	0.463203	0.474425	0.515657	0.595585	0.378221	0.395438	0.476378	0.463366	0.361444	0.403534	0.454186	0.456997	0.379751	0.4349	0.433635	0.509877	0.449508	0.426797	0.520157	0.558801	0.492576	0.642846	0.262224	0.383967	0.388085	0.46615	0.558875	0.583938	0.263478	0.412285	0.585036	0.509649	0.543296	0.461045	0.428033	0.550251	0.580134	0.282021	0.488616	0.605132	0.463861	0.664297	0.336218
Cell_0031	TFEB_TR	Insulin 10000 ng/ml	1.52636	1.65896	0.452096	1.80297	1.52443	1.31619	1.05738	0.430845	2.24215	3.72275	1.22941	4.36467	1.36462	2.04124	2.61788	2.40388	3.37627	1.17456	1.84387	1.30443	2.379	1.36367	1.25164	0.740298	1.28525	0.577578	1.46037	1.07103	1.99593	0.926018	0.632432	3.66601	0.693039	2.38938	1.2276	0.690896	1.8209	1.84382	0.774671	1.8508	0.637649	3.1017	1.84002	1.81026	1.71722	0.540383	1.96832
Cell_0031	FOXO_TR	Insulin 10000 ng/ml	2.26691	2.97365	2.33849	4.00078	3.19952	3.30291	2.95307	1.1478	3.19456	4.81584	3.28988	3.72048	1.65186	2.88827	4.76691	3.73948	3.35019	2.9435	3.94458	2.31971	3.51067	2.69563	2.9351	2.62349	3.22591	3.11598	1.7203	1.27535	3.59779	2.6761	0.926469	5.58682	2.76219	4.80197	3.05116	1.8246	3.46399	3.26996	3.03922	3.84452	2.33421	3.31085	3.72215	3.05894	3.60974	3.14834	1.72237
Cell_0031	AMPKARt2	Insulin 10000 ng/ml	0.260279	0.519186	0.620774	0.468135	0.455871	0.456301	0.511964	0.594812	0.378822	0.363985	0.468905	0.488877	0.345725	0.404491	0.448933	0.47834	0.355303	0.453456	0.432197	0.502172	0.427795	0.429856	0.491353	0.556668	0.491004	0.593162	0.25658	0.337242	0.411929	0.4862	0.521869	0.574319	0.273093	0.403824	0.542196	0.527484	0.546541	0.451435	0.441649	0.560748	0.58534	0.299792	0.497525	0.600987	0.49868	0.655401	0.31893
Cell_0032	TFEB_TR	Insulin 10000 ng/ml	1.58403	2.75679	0.476932	1.7552	1.516	1.34122	1.1823	0.489082	1.16478	2.96701	1.30605	3.48685	1.52157	2.16132	2.33056	2.48891	3.9524	0.591476	1.89711	1.68578	2.6284	1.52999	2.17021	0.753159	1.28972	0.649178	1.99561	1.24673	1.99722	0.920497	0.46578	4.62162	1.06877	2.2852	1.29757	0.667423	1.85762	1.82504	0.925556	1.73667	0.648859	3.05549	1.74076	1.71008	1.62395	0.548067	1.64549
Cell_0032	FOXO_TR	Insulin 10000 ng/ml	2.11126	2.95485	2.24764	3.85465	3.17142	3.24633	3.27571	1.16091	3.20533	4.42257	3.54311	3.77744	1.48939	2.99371	4.32371	3.7188	3.05084	1.9469	4.15977	2.34195	3.30398	2.77829	2.83819	2.63453	3.33724	3.54212	1.97384	2.47328	3.7932	2.63072	0.878844	5.77325	3.02923	4.48358	3.00972	1.78722	3.47464	3.30196	3.05503	3.80733	2.29518	2.90185	3.49689	3.19597	3.48518	2.99945	1.61839
Cell_0032	AMPKARt2	Insulin 10000 ng/ml	0.232092	0.515751	0.600658	0.45634	0.477288	0.458915	0.478938	0.598398	0.359085	0.372781	0.469517	0.490445	0.332355	0.409968	0.448915	0.472413	0.355192	0.377964	0.435203	0.525563	0.425475	0.453681	0.48844	0.543009	0.500722	0.574874	0.27518	0.400252	0.425554	0.493718	0.533817	0.524708	0.299785	0.421684	0.520821	0.534341	0.570958	0.424312	0.439368	0.57316	0.604679	0.304141	0.491551	0.599082	0.4781	0.675914	0.354741
Cell_0033	TFEB_TR	Insulin 10000 ng/ml	1.75387	1.88074	0.461354	1.56254	1.50475	1.33594	1.19185	0.484449	1.24849	3.77168	1.44044	4.31845	1.59982	2.21274	2.482	2.59989	2.8508	0.551278	1.81648	1.90293	2.44521	1.60374	2.18426	0.750611	1.33026	0.61235	1.81683	1.41352	1.76553	0.745018	0.755822	3.92809	1.16979	2.2887	1.46505	0.666646	1.93186	1.70061	1.00117	1.66036	0.636802	3.2177	1.54831	1.78268	1.76969	0.546901	1.78567
Cell_0033	FOXO_TR	Insulin 10000 ng/ml	2.16236	3.05704	2.33968	3.87599	3.29418	3.24249	3.0937	1.10071	3.01547	4.44411	3.6349	3.64521	1.40685	3.15579	4.36347	3.74541	2.9509	1.77399	3.94539	2.39058	3.2078	2.67271	2.75481	2.7607	3.28348	3.80279	2.22911	2.58357	3.0813	2.34902	1.15532	5.58404	3.09754	4.57302	3.01	1.70873	3.35925	3.38968	3.26928	3.88711	2.29348	3.13746	3.46186	3.19227	3.41625	3.04188	1.60673
Cell_0033	AMPKARt2	Insulin 10000 ng/ml	0.249665	0.526713	0.600338	0.444847	0.486667	0.444954	0.463338	0.571674	0.364812	0.392344	0.439775	0.495941	0.329531	0.435881	0.427823	0.465442	0.349783	0.350255	0.434241	0.503556	0.433995	0.464304	0.483205	0.505832	0.517106	0.587676	0.258464	0.398469	0.435254	0.484479	0.411573	0.511442	0.330839	0.405286	0.515074	0.529973	0.561174	0.434629	0.430857	0.594601	0.605377	0.312686	0.513131	0.593202	0.511747	0.674818	0.354834
Cell_0034	TFEB_TR	Insulin 10000 ng/ml	1.51296	2.02356	0.48195	2.41782	1.43269	1.33619	1.22477	0.438431	1.29501	2.6137	1.41237	4.45158	1.47657	2.31702	2.60973	2.68276	2.37003	0.577117	1.78861	1.3859	2.53049	1.10634	2.39785	0.783857	1.2853	0.612719	1.81009	1.46926	1.78068	0.924374	0.633906	4.2422	2.37731	2.33587	1.50771	0.61356	1.89525	1.74103	0.673551	1.28985	0.62364	3.35171	1.68323	1.80422	1.61248	0.599318	1.71363
Cell_0034	FOXO_TR	Insulin 10000 ng/ml	1.90628	2.99642	2.30615	3.79266	3.38006	3.37	3.20271	1.15878	2.94602	4.35181	3.36236	3.67355	1.62353	3.31824	4.71357	3.66607	2.85774	1.90598	3.92036	2.35883	3.4446	2.82128	2.64304	2.75326	3.29341	3.56993	1.89448	2.77113	3.25933	2.8557	1.43257	5.537	3.71102	4.60293	2.91292	1.65542	3.37866	3.34125	3.30295	3.73783	2.25894	3.37292	3.61922	3.2129	3.16903	2.94385	1.42787
Cell_0034	AMPKARt2	Insulin 10000 ng/ml	0.246963	0.535412	0.619217	0.447793	0.492785	0.430751	0.467063	0.61046	0.381458	0.375604	0.456902	0.490882	0.346189	0.448962	0.427118	0.477656	0.340602	0.377208	0.446137	0.480887	0.443128	0.441509	0.597971	0.525826	0.566278	0.578	0.236471	0.411962	0.45034	0.460386	0.510692	0.484861	0.355813	0.394525	0.509044	0.540871	0.537238	0.419687	0.414106	0.621924	0.622987	0.320585	0.498372	0.630991	0.514755	0.679738	0.354695
Cell_0035	TFEB_TR	Insulin 10000 ng/ml	1.78735	2.07105	0.468468	1.8419	1.373	1.30784	1.30613	0.386582	1.39762	3.4927	1.45233	2.9355	1.51678	2.15275	2.8513	2.78921	2.38649	0.582915	1.77158	1.3836	2.73124	1.37389	2.11089	0.767402	1.16718	0.624064	1.53968	1.50648	1.64109	1.20087	0.762401	3.84587	1.68689	2.4768	1.55143	0.805865	2.01118	1.91274	0.913589	1.35902	0.617888	3.18003	1.53541	1.83928	1.65824	0.470033	1.58421
Cell_0035	FOXO_TR	Insulin 10000 ng/ml	2.03738	3.04943	2.25671	3.68143	3.40317	3.17287	3.27641	1.09554	2.94937	4.409	3.27927	3.64852	1.61059	3.05697	4.49555	3.91614	2.71146	1.85928	3.9968	2.31263	3.514	2.87453	2.2853	2.67434	3.22751	3.49862	1.9055	2.66509	3.3488	2.67618	1.32681	5.78811	2.93128	4.54099	2.78131	2.52967	3.50115	3.4756	3.21314	3.96042	2.21512	3.26647	3.64555	3.18756	3.1746	2.97909	1.43127
Cell_0035	AMPKARt2	Insulin 10000 ng/ml	0.247032	0.557147	0.625187	0.467929	0.509841	0.446452	0.473711	0.584699	0.391495	0.374755	0.441043	0.469608	0.335294	0.494522	0.436499	0.453356	0.317777	0.399655	0.424888	0.463952	0.448066	0.424804	0.625528	0.559422	0.582229	0.59124	0.263219	0.394184	0.45256	0.434622	0.40528	0.463016	0.376911	0.367224	0.488449	0.424393	0.559392	0.405778	0.379707	0.612354	0.627299	0.299706	0.484418	0.667959	0.526978	0.680635	0.352057
Cell_0036	TFEB_TR	Insulin 10000 ng/ml	1.70432	2.00649	0.480637	1.6683	1.28843	1.26454	1.27752	0.615758	2.48793	3.04297	1.56104	4.3997	1.69461	2.10504	2.71414	2.79079	2.69437	0.573796	1.78273	1.69744	2.42892	1.53448	1.89179	0.767511	1.07247	0.668368	1.93606	0.63326	1.62305	1.2741	0.738965	3.43036	4.27077	2.60785	1.5596	0.855713	2.22731	2.15796	0.805373	1.46859	0.65508	2.93817	1.69565	1.70415	1.64174	0.536583	1.58463
Cell_0036	FOXO_TR	Insulin 10000 ng/ml	1.88284	3.01019	2.21888	3.60232	3.30511	3.27194	3.1015	1.2412	2.96768	4.15895	3.4069	3.7858	1.80143	3.00305	4.4259	3.8897	2.95869	2.07868	3.85034	2.25579	3.21779	2.80641	2.14614	2.60241	2.97607	3.58957	1.85348	2.2798	3.37405	2.58138	1.26123	5.55609	3.31597	4.47762	2.96376	2.55309	3.43355	3.37177	3.34745	4.15605	2.20281	3.46315	3.64693	3.21214	3.0932	3.07104	1.47193
Cell_0036	AMPKARt2	Insulin 10000 ng/ml	0.251314	0.557833	0.606873	0.502521	0.494653	0.465594	0.474858	0.607205	0.438083	0.405538	0.436316	0.486631	0.316544	0.497614	0.434043	0.462127	0.300442	0.413835	0.415908	0.4189	0.448621	0.417876	0.621926	0.53525	0.590544	0.571638	0.267152	0.579817	0.475016	0.407855	0.357457	0.471254	0.428771	0.361066	0.484663	0.323095	0.527258	0.390125	0.405699	0.633659	0.648968	0.332913	0.497984	0.669984	0.513381	0.650297	0.314077
Cell_0037	TFEB_TR	Insulin 10000 ng/ml	1.49383	1.86096	0.505707	1.52986	1.26537	1.18294	1.3302	0.413653	1.46415	2.99967	1.66436	4.03619	1.70212	2.07403	2.92935	2.76448	1.54353	0.583148	1.78587	2.6879	2.36279	1.67616	0.814765	0.73831	0.983416	0.725755	1.24964	0.644073	1.62131	1.25205	0.721205	7.85961	1.5044	2.39874	1.46504	0.867997	2.67685	1.81805	0.871992	1.38348	0.667499	3.02605	1.56491	1.59307	1.6823	0.540475	1.49076
Cell_0037	FOXO_TR	Insulin 10000 ng/ml	1.97661	3.01965	2.36118	3.44151	3.28285	3.07604	3.03043	1.16865	2.96918	4.30586	3.53332	3.75349	1.75577	3.0673	4.71049	3.80943	2.47761	2.46109	3.70279	2.45292	3.12207	2.72671	2.06873	2.45261	2.84609	3.6146	1.83503	2.31585	3.54408	2.63859	1.24044	5.93589	3.27354	4.42135	2.80638	3.16674	3.48612	3.44253	3.33559	4.00491	3.01085	3.24956	3.41403	3.31856	3.15855	2.99242	1.38747
Cell_0037	AMPKARt2	Insulin 10000 ng/ml	0.264287	0.581159	0.621677	0.529932	0.467731	0.49036	0.476151	0.609535	0.464947	0.49898	0.443974	0.484112	0.334175	0.484858	0.449042	0.440177	0.337866	0.427931	0.410189	0.413359	0.449597	0.409666	0.603176	0.524589	0.576808	0.570319	0.300419	0.587495	0.456942	0.363497	0.384738	0.469848	0.470348	0.348508	0.479058	0.338341	0.523759	0.404458	0.424478	0.61539	0.611526	0.366559	0.488802	0.666243	0.505569	0.673723	0.310333
Cell_0038	TFEB_TR	Insulin 10000 ng/ml	1.52952	1.80965	0.414233	1.79136	1.33922	1.02982	1.22915	0.500158	1.63031	3.17439	1.71494	4.66682	1.69926	2.18405	2.84762	2.5843	1.26044	0.579589	1.79253	1.74231	2.55487	1.53667	1.27043	0.748349	0.916851	0.738208	1.53861	0.788065	1.55923	1.57418	0.734859	7.25549	0.941413	2.50114	1.44462	0.751027	3.18376	1.66976	0.764774	1.49132	0.726405	2.92315	1.61507	1.31588	1.75701	0.642615	1.62527
Cell_0038	FOXO_TR	Insulin 10000 ng/ml	1.93197	3.02908	2.29699	3.41983	3.37255	2.83937	2.88828	1.16878	2.8883	4.41004	3.21766	3.54227	2.00957	3.21557	4.51196	3.45339	2.30445	2.70009	3.5792	2.46199	3.46731	2.78794	2.12301	2.45835	2.79566	3.43722	1.8951	2.33625	3.46114	2.28133	1.30202	5.65963	4.27864	4.15288	2.9017	2.95011	3.46507	3.3707	3.43685	3.99328	3.13179	3.18356	3.44888	3.28622	3.06146	3.13189	1.38493
Cell_0038	AMPKARt2	Insulin 10000 ng/ml	0.251657	0.552159	0.649077	0.5464	0.49506	0.503285	0.455075	0.616878	0.417696	0.516104	0.422154	0.475842	0.348285	0.492813	0.446013	0.445273	0.330877	0.392929	0.416886	0.392277	0.439002	0.405222	0.624591	0.570935	0.596075	0.573383	0.286309	0.539379	0.445868	0.312555	0.367337	0.468506	0.620852	0.353017	0.490482	0.350083	0.515875	0.401164	0.458823	0.598742	0.597709	0.381417	0.50357	0.65946	0.469326	0.666964	0.30887
Cell_0039	TFEB_TR	Insulin 10000 ng/ml	1.28959	1.81625	0.500813	1.88463	1.41639	1.02292	1.29538	0.529315	1.62789	2.44173	1.71179	3.6914	1.51346	2.14293	2.8021	2.66187	1.01809	0.56824	1.74399	2.41091	2.89532	2.32801	0.836683	0.728148	0.907671	0.690427	1.52412	0.696116	1.78924	1.77734	0.865394	6.9294	0.935505	2.56256	1.45922	0.791272	2.91104	1.78258	0.766705	1.6424	0.76853	2.90032	1.99718	1.36206	1.72112	0.684437	1.53516
Cell_0039	FOXO_TR	Insulin 10000 ng/ml	1.99706	3.00552	2.72532	3.37374	3.34771	3.16418	2.91684	1.20186	3.01869	4.06747	3.10176	3.52442	1.80962	3.30007	4.92792	3.50721	2.24925	2.75249	3.32282	2.54479	3.66195	2.78291	2.34199	2.19849	2.64828	3.20744	1.88121	2.35095	3.62979	2.26747	1.37912	5.5883	4.70029	4.37198	2.92458	2.73113	3.33464	3.41965	3.28283	4.32305	3.052	3.4092	3.50361	3.39199	3.05361	4.73293	1.29877
Cell_0039	AMPKARt2	Insulin 10000 ng/ml	0.262606	0.543879	0.620851	0.562935	0.438823	0.481313	0.467628	0.629528	0.412052	0.545721	0.440674	0.458339	0.358304	0.481289	0.453624	0.427747	0.335476	0.419445	0.427623	0.36915	0.419044	0.398761	0.642264	0.54038	0.584128	0.561585	0.303342	0.526394	0.402663	0.322035	0.379605	0.525545	0.609496	0.363672	0.508074	0.346773	0.506194	0.412517	0.453053	0.58274	0.580477	0.425531	0.505542	0.646496	0.47813	0.632691	0.331503
Cell_0040	TFEB_TR	Insulin 10000 ng/ml	2.13476	2.66317	0.481284	2.09279	1.4518	1.03603	1.3255	0.537346	2.07252	2.06348	1.70833	3.44502	1.27269	2.18017	2.54466	2.72214	1.187	0.560075	1.81781	1.85967	2.95669	1.34724	1.09526	0.798561	0.896679	0.757629	1.68594	0.879196	1.84093	1.43189	0.771947	5.02572	0.898363	2.56288	1.27387	0.781325	2.15076	0.740933	0.748122	1.76594	0.806996	2.94664	1.53764	1.35733	1.65294	0.855986	1.57877
Cell_0040	FOXO_TR	Insulin 10000 ng/ml	2.16432	3.01086	2.45854	3.43705	3.39779	3.20953	3.08549	1.3003	2.97251	4.49899	3.26257	3.51293	2.39046	3.31743	4.70559	3.86282	2.19933	2.78162	3.56812	2.48425	3.56555	2.85506	2.66929	2.42217	2.82351	3.38297	1.73242	2.44575	3.65809	1.977	1.28106	5.33533	4.20393	4.25796	2.69759	2.98276	3.26542	1.96615	3.23009	4.21928	3.1753	3.64276	3.17635	3.31511	2.91722	4.71104	1.38627
Cell_0040	AMPKARt2	Insulin 10000 ng/ml	0.27928	0.527199	0.605904	0.549285	0.457675	0.485347	0.488272	0.59441	0.370761	0.544095	0.454383	0.438342	0.326949	0.465955	0.463245	0.440054	0.320505	0.416079	0.430432	0.318664	0.431557	0.384658	0.618632	0.54298	0.56682	0.526765	0.297006	0.539236	0.392602	0.345491	0.492599	0.554523	0.600054	0.363798	0.501631	0.326687	0.501859	0.554704	0.476858	0.600718	0.579289	0.417054	0.536992	0.629712	0.490153	0.619845	0.317685
Cell_0041	TFEB_TR	Insulin 10000 ng/ml	2.14185	1.86529	0.446556	1.76472	1.45592	1.03253	1.42053	0.403586	1.79979	2.61686	1.50546	3.30708	1.24915	2.3302	2.67134	2.43794	1.00961	0.593429	1.79522	2.40292	2.96344	1.55161	1.25618	0.824901	0.90842	0.812935	1.97467	1.03719	1.95773	1.52302	0.675385	4.73406	0.997651	2.66768	1.11271	0.794507	1.90261	0.760233	1.16632	1.93191	0.832269	2.67435	1.73777	1.3526	1.77892	0.991664	1.66606
Cell_0041	FOXO_TR	Insulin 10000 ng/ml	2.12093	2.93317	2.25386	3.33331	3.3049	3.35822	3.27494	1.29871	2.99394	4.48945	3.14984	3.49626	2.10617	3.54499	4.84919	3.35502	2.2331	2.91785	3.37474	2.54088	3.66292	2.72173	3.31788	2.30467	2.6063	3.19207	2.05686	2.56566	3.50427	2.39128	1.13586	5.07733	4.32574	4.47867	2.53255	3.06501	3.17899	1.94002	3.37676	3.96882	3.06687	3.5104	3.20159	3.23823	3.00679	4.79579	1.33754
Cell_0041	AMPKARt2	Insulin 10000 ng/ml	0.287026	0.52935	0.632256	0.556512	0.468263	0.50287	0.536977	0.607728	0.351539	0.548151	0.480803	0.443169	0.384537	0.483966	0.457806	0.417738	0.339385	0.403096	0.437408	0.291762	0.444579	0.417511	0.62117	0.529177	0.576955	0.507694	0.306398	0.564012	0.405392	0.321483	0.544504	0.581388	0.607269	0.367185	0.511621	0.357301	0.495151	0.533474	0.500357	0.584306	0.545964	0.397843	0.514294	0.612927	0.510508	0.565429	0.359104
Cell_0042	TFEB_TR	Insulin 10000 ng/ml	1.56508	1.98988	0.433322	1.62078	1.40196	0.993064	1.35199	0.352249	1.97257	2.85983	1.38571	4.29142	1.47606	2.2376	3.15603	2.38167	0.937192	0.587654	1.83661	3.72098	3.01376	0.98662	2.17896	0.84011	0.93623	0.854584	1.615	1.0408	2.06723	1.50475	0.626397	3.68668	0.97078	2.36611	1.22443	0.851564	2.20392	0.739878	1.02889	1.97715	0.890562	2.81999	0.483713	1.56822	1.73227	1.03467	1.62407
Cell_0042	FOXO_TR	Insulin 10000 ng/ml	2.28172	2.82199	2.19809	3.09968	3.25847	3.3821	3.2837	1.37314	2.92328	4.29079	3.22432	3.51475	1.92135	3.36023	5.32991	3.33925	2.05687	2.99842	3.44423	2.51721	3.60918	2.6789	3.7203	2.43237	2.68053	3.33303	2.00321	2.98666	3.69392	2.45437	1.19474	5.22865	4.22292	4.26939	2.55982	2.90658	3.21771	2.02542	3.33292	3.61403	3.19634	3.50659	2.51095	3.21388	2.95518	4.90039	1.37155
Cell_0042	AMPKARt2	Insulin 10000 ng/ml	0.284804	0.540205	0.602211	0.545129	0.490557	0.501286	0.563175	0.627434	0.326165	0.541495	0.506037	0.434276	0.332954	0.456354	0.453797	0.413972	0.337358	0.406032	0.438527	0.273759	0.437198	0.493153	0.61018	0.54934	0.561356	0.523011	0.282262	0.581647	0.377116	0.322257	0.608985	0.558711	0.586766	0.360833	0.529638	0.342134	0.475296	0.530966	0.532172	0.592963	0.536526	0.38329	0.600284	0.616909	0.490114	0.591882	0.372113
Cell_0043	TFEB_TR	Insulin 10000 ng/ml	1.93116	1.91806	0.459087	2.29684	1.39739	0.98506	1.31102	0.449116	1.21872	2.28557	1.32698	4.0304	1.42006	2.45972	3.06047	2.33706	0.850927	0.588021	1.76733	1.95703	2.99093	1.4264	2.4211	0.907968	0.984221	0.859202	1.55925	1.12729	2.10088	1.59258	0.63728	4.43877	0.944181	2.47612	1.11984	0.82148	2.17641	0.754944	0.711062	1.98269	0.952904	3.10273	0.519044	1.59398	1.74743	1.09951	1.69252
Cell_0043	FOXO_TR	Insulin 10000 ng/ml	2.52745	2.85543	2.18321	3.27264	3.43756	3.40488	3.16501	1.36691	2.84548	4.56216	3.32031	3.32149	2.26539	3.68053	5.2728	3.38662	2.09088	2.90753	3.47233	2.59128	3.39959	2.53939	3.09194	2.6475	2.75391	3.19137	1.93587	2.77725	3.45544	2.18244	1.22679	5.16898	4.15758	4.27404	2.51732	2.77992	3.17956	2.11833	3.20597	3.83623	3.10836	3.99702	2.61297	3.65843	3.08045	5.06347	1.2086
Cell_0043	AMPKARt2	Insulin 10000 ng/ml	0.282296	0.549127	0.633107	0.553193	0.507987	0.502975	0.569145	0.606693	0.312925	0.548878	0.502502	0.455618	0.347143	0.468292	0.462123	0.428299	0.316014	0.412198	0.448973	0.272087	0.456455	0.533375	0.625369	0.562392	0.557115	0.491903	0.295186	0.588038	0.37507	0.312104	0.614145	0.540365	0.584375	0.374961	0.533909	0.32394	0.495178	0.545268	0.502849	0.553689	0.535732	0.396951	0.599233	0.598581	0.501888	0.572289	0.444636
Cell_0044	TFEB_TR	Insulin 10000 ng/ml	2.01742	2.24554	0.439529	1.7088	1.32119	0.995071	1.18954	0.404071	1.57597	2.11692	1.27298	3.15399	1.21661	2.36572	3.11946	2.38293	0.828167	0.58749	1.70224	2.15066	2.48105	1.23802	2.10032	0.885659	1.02176	0.873926	2.13348	1.0716	2.11107	1.57325	0.748991	5.41197	0.91144	2.49555	1.16901	0.871217	2.43477	0.886927	0.880693	2.27005	1.04043	2.64907	0.504016	1.36113	1.75813	1.19089	1.54366
Cell_0044	FOXO_TR	Insulin 10000 ng/ml	2.28051	2.88142	1.99556	3.25194	3.40912	3.42163	2.89452	1.40495	2.75464	3.94438	3.26016	3.39127	1.58971	3.4781	5.23072	3.51927	2.1309	2.90229	3.51553	2.53421	3.26373	2.5954	2.67466	2.51542	2.76276	3.28429	2.28563	3.14988	3.52749	2.58051	1.26689	5.3511	3.98964	4.42438	2.71383	2.5638	3.23567	2.22342	3.06693	3.72871	3.29615	3.56555	2.74834	3.22501	3.17926	5.01231	1.21771
Cell_0044	AMPKARt2	Insulin 10000 ng/ml	0.249424	0.571855	0.620252	0.547193	0.526089	0.481104	0.574403	0.613482	0.335247	0.487012	0.488899	0.436402	0.31869	0.480689	0.432569	0.423586	0.331552	0.398316	0.420306	0.270721	0.452418	0.557897	0.617586	0.5669	0.541474	0.515551	0.312512	0.621559	0.39761	0.322482	0.595075	0.542637	0.590039	0.368957	0.526088	0.377219	0.490052	0.523605	0.490773	0.561912	0.508581	0.428277	0.569311	0.625446	0.491368	0.592019	0.466922
Cell_0045	TFEB_TR	Insulin 10000 ng/ml	1.70779	1.77596	0.457814	1.46385	1.24569	1.03177	1.22855	0.562782	1.37495	2.3078	1.20317	5.53635	1.32724	2.43947	3.00619	2.20252	0.940864	0.565943	1.63868	2.42036	2.25707	1.28385	1.65274	0.938442	1.06097	0.84287	1.96994	0.9778	2.16811	1.58678	0.631218	6.24003	0.93394	2.69076	1.1701	0.873554	2.46062	0.907402	0.799969	2.1838	1.1103	2.40245	0.469136	1.69936	1.94107	1.24224	1.3948
Cell_0045	FOXO_TR	Insulin 10000 ng/ml	2.34923	2.8362	2.2252	3.10906	3.38003	3.51783	2.93284	1.45731	2.68089	4.07835	3.08943	3.31585	1.21866	3.60355	4.84751	3.26518	2.25328	3.09959	3.48139	2.44886	2.89955	2.73292	2.76713	2.69549	2.91391	3.11769	2.20283	3.08144	3.52168	2.65426	1.26841	5.49761	4.16702	4.385	2.40165	2.86098	3.19997	2.11448	3.09086	3.72321	3.40047	3.90606	2.67763	3.33363	3.48911	5.10236	1.22683
Cell_0045	AMPKARt2	Insulin 10000 ng/ml	0.246136	0.556134	0.62925	0.564075	0.509141	0.457013	0.558856	0.610377	0.30199	0.502298	0.474435	0.424017	0.299597	0.475066	0.435514	0.40877	0.326188	0.419799	0.438511	0.251027	0.452678	0.552492	0.629779	0.583929	0.52894	0.542213	0.311463	0.650216	0.479048	0.327887	0.61639	0.531895	0.578923	0.364115	0.52575	0.455443	0.509099	0.538709	0.503839	0.567512	0.487497	0.453186	0.588228	0.583588	0.46754	0.562804	0.489207
Cell_0046	TFEB_TR	Insulin 10000 ng/ml	1.65048	1.91382	0.46417	2.11714	1.22274	1.07846	1.25607	0.566472	2.43727	2.66196	1.17574	3.74508	1.18487	2.39314	3.11483	2.34753	0.940618	0.553679	1.49001	1.98359	2.27475	1.57779	1.54829	1.01101	1.09577	0.832635	1.46759	1.05274	2.10652	1.6003	0.688787	4.70475	1.06573	2.53468	1.15008	0.824873	1.97144	0.858433	0.889746	2.10388	1.16808	2.77032	0.493549	1.9737	2.13019	1.19402	1.37059
Cell_0046	FOXO_TR	Insulin 10000 ng/ml	2.20515	2.8991	3.34723	3.12537	3.40523	3.45208	3.0014	1.45729	2.69399	4.00923	3.42381	3.34765	1.11356	3.51959	4.78485	3.68494	2.23895	2.98331	3.19908	2.52397	2.86456	2.74003	3.09676	3.05003	2.92269	3.09507	2.24338	3.21994	3.59028	2.72802	1.32801	5.42809	4.24441	4.21089	2.48782	2.81452	3.20469	2.11408	3.13851	3.77451	3.46544	3.90645	2.75881	3.77779	3.69054	4.991	1.35634
Cell_0046	AMPKARt2	Insulin 10000 ng/ml	0.222516	0.554817	0.588635	0.56807	0.489151	0.43051	0.581403	0.628273	0.325406	0.496622	0.467327	0.46668	0.325354	0.486685	0.434156	0.410652	0.336514	0.396154	0.43463	0.260061	0.467136	0.537844	0.642175	0.596066	0.518122	0.538599	0.309539	0.639966	0.45576	0.333291	0.593611	0.53099	0.587863	0.347653	0.524075	0.467086	0.499904	0.532468	0.479467	0.585219	0.485882	0.438617	0.600211	0.619125	0.463651	0.545741	0.450981
Cell_0047	TFEB_TR	Insulin 10000 ng/ml	1.62719	1.9051	0.489687	1.72645	1.24401	1.17722	1.28634	0.590504	1.76173	2.83065	1.20499	4.32263	1.02185	2.27761	3.07527	2.37658	0.815599	0.543724	1.46614	2.05938	2.18423	2.00496	1.81145	1.09834	1.17854	0.803448	1.44842	0.992248	2.01103	1.42872	0.643515	6.20311	1.03855	2.52398	1.25525	0.868271	2.02344	0.875954	0.911816	2.04635	1.20171	2.65848	0.477502	1.79373	2.03915	1.37649	1.28455
Cell_0047	FOXO_TR	Insulin 10000 ng/ml	2.37255	2.98969	3.37823	3.05159	3.31422	3.52024	3.14768	1.47688	2.66702	3.79451	3.48094	3.37498	0.98456	3.33758	4.73321	3.7151	2.35484	3.01534	3.17274	2.33922	2.78684	2.66456	3.30655	3.25715	3.04709	3.06925	2.23626	3.35294	3.91923	2.42779	1.24558	5.43034	4.02664	4.21046	2.5609	2.93465	3.20028	2.12579	3.11345	3.88825	3.37317	3.76521	2.61896	3.60653	3.7694	5.03319	1.15159
Cell_0047	AMPKARt2	Insulin 10000 ng/ml	0.239189	0.554457	0.584792	0.553473	0.490183	0.439446	0.556332	0.642286	0.327184	0.453106	0.478475	0.476678	0.35743	0.489338	0.415583	0.446763	0.356305	0.404855	0.431875	0.260171	0.475119	0.538959	0.60273	0.613314	0.502762	0.511858	0.294369	0.649577	0.468937	0.249835	0.544422	0.531295	0.577568	0.351061	0.516865	0.475156	0.478517	0.525659	0.518321	0.603096	0.478807	0.384477	0.579754	0.592159	0.46721	0.549924	0.438838
Cell_0048	TFEB_TR	Insulin 10000 ng/ml	2.03413	1.31485	0.522814	1.74461	1.27286	1.22826	1.31773	0.65349	1.96533	2.20011	1.24366	3.68007	0.946045	2.25261	2.84291	2.26787	0.911046	0.602042	1.37523	1.81515	2.10876	1.41008	2.94535	1.11931	1.24651	0.794979	1.51111	0.966199	1.99096	2.15742	0.618879	2.83177	1.24841	2.40651	1.27939	0.696107	1.8511	1.00574	1.17867	2.08038	1.27637	2.68705	0.474585	1.71808	2.11089	1.29643	1.46959
Cell_0048	FOXO_TR	Insulin 10000 ng/ml	2.30729	2.9239	3.57557	3.26006	3.31689	3.51878	3.3744	2.47514	2.62131	3.7742	3.32888	3.3376	0.827624	3.44651	4.49654	3.67997	2.10315	3.14939	2.9043	2.30578	2.90422	2.52631	3.36153	3.48642	3.08126	3.1617	2.12328	3.35634	3.9893	2.58245	1.28731	5.06907	4.53669	4.14828	2.55822	2.73359	3.19222	2.11052	3.19654	3.95046	3.58678	3.83353	2.6015	3.48562	3.62492	4.89143	1.42355
Cell_0048	AMPKARt2	Insulin 10000 ng/ml	0.233807	0.560779	0.553685	0.561428	0.483653	0.413466	0.557932	0.606367	0.346291	0.429849	0.479806	0.508957	0.352721	0.482789	0.439292	0.453028	0.367362	0.409422	0.439037	0.274086	0.491246	0.557488	0.598349	0.613026	0.501917	0.518879	0.319994	0.679659	0.474635	0.269724	0.557799	0.528404	0.551194	0.353711	0.514549	0.502609	0.504963	0.523758	0.508994	0.613061	0.465462	0.386806	0.558058	0.590624	0.478283	0.557494	0.366778
Cell_0049	TFEB_TR	Insulin 10000 ng/ml	1.90273	2.17436	0.49835	1.81462	1.27095	1.32305	1.37535	0.836596	1.46296	3.44805	1.32705	3.49916	0.93137	2.20858	3.02125	2.1962	0.712202	0.59996	1.41223	2.26524	2.33748	1.64973	3.8997	1.07095	1.32357	0.761137	1.71642	0.892392	1.90396	1.70583	0.758293	5.09472	1.40085	2.43869	1.26123	0.859144	1.93192	0.983988	1.03101	1.61559	1.25839	2.59658	0.507468	1.62778	2.05642	1.45596	1.39804
Cell_0049	FOXO_TR	Insulin 10000 ng/ml	2.09591	2.91595	3.5007	3.24352	3.15683	3.61145	3.49593	2.97965	2.75481	3.89398	3.29598	3.4191	0.798976	3.20844	4.92521	3.61458	1.8614	3.0315	2.87684	2.43443	3.09358	2.64455	3.12462	3.37431	3.30224	2.95173	2.15561	3.51946	3.62224	2.46533	1.35999	4.93049	4.7621	3.93001	2.51521	2.93389	2.97665	2.0587	3.05387	3.57432	3.33308	3.75519	2.58545	3.1607	3.5355	5.06956	1.09364
Cell_0049	AMPKARt2	Insulin 10000 ng/ml	0.245793	0.566595	0.517747	0.555358	0.482066	0.416635	0.563152	0.601369	0.346231	0.394936	0.481963	0.504853	0.343545	0.480863	0.417628	0.466962	0.355851	0.360226	0.434154	0.291901	0.466866	0.554044	0.618879	0.610218	0.487083	0.495437	0.310212	0.679222	0.444905	0.277525	0.511809	0.509473	0.519879	0.352694	0.531708	0.519304	0.471574	0.525691	0.479774	0.61727	0.460998	0.395353	0.569365	0.633562	0.518436	0.567586	0.354689
Cell_0050	TFEB_TR	Insulin 10000 ng/ml	1.78043	1.61655	0.508314	1.78308	1.31382	1.31767	1.4033	0.966076	1.5772	2.59825	1.42827	2.92324	1.28273	2.1831	2.87498	2.06164	0.759208	0.595319	1.45365	2.02169	2.29766	1.75134	2.0038	1.22767	1.39511	0.785208	1.55524	0.959255	1.8365	1.72563	0.90199	4.80196	1.3583	2.41611	1.20912	0.840587	1.67558	0.987934	1.14521	1.46489	1.29652	2.99679	0.490097	1.40556	2.25082	1.31848	1.69442
Cell_0050	FOXO_TR	Insulin 10000 ng/ml	2.10635	2.98745	3.29821	3.07651	3.16239	3.51591	3.51188	3.28485	2.61713	3.83083	3.49716	3.43966	0.94307	3.19341	5.64737	3.45852	1.92666	2.81412	2.81295	2.50944	3.08557	2.85219	2.93381	3.77282	3.43434	2.74469	2.00673	3.53956	3.67928	2.73427	1.34375	5.07522	4.67648	4.10623	2.58058	2.9983	3.05124	2.13392	3.07297	3.66348	3.40817	3.65996	2.52999	3.13159	3.86284	4.85354	1.10396
Cell_0050	AMPKARt2	Insulin 10000 ng/ml	0.246375	0.565889	0.494751	0.556484	0.518454	0.404004	0.517276	0.598794	0.370468	0.386055	0.476749	0.490201	0.268803	0.483263	0.444019	0.46555	0.347703	0.309164	0.411507	0.300605	0.457156	0.537395	0.619898	0.606663	0.481275	0.518357	0.297925	0.668727	0.468816	0.300144	0.498262	0.513924	0.532268	0.369131	0.606179	0.505518	0.48826	0.547769	0.487096	0.599615	0.464139	0.395676	0.586293	0.694945	0.48833	0.562878	0.350782
Cell_0051	TFEB_TR	Insulin 10000 ng/ml	1.56651	1.87109	0.577221	1.5079	0.485849	1.29133	1.45974	0.82353	3.41537	2.91901	1.50634	3.00516	1.2596	2.14252	2.5799	2.15515	0.871207	0.675335	1.56829	2.14585	2.35672	1.25429	2.54132	1.19811	1.43283	0.778871	1.41723	1.10384	1.94379	2.00361	1.02347	4.88382	1.61064	2.3253	1.03719	0.803493	1.94782	0.988348	1.29106	1.78311	1.24379	2.9236	0.479004	1.75735	2.27682	1.23166	1.31275
Cell_0051	FOXO_TR	Insulin 10000 ng/ml	2.24378	2.94167	4.15345	3.21113	1.86394	3.38621	3.40762	2.76706	2.72266	3.71295	3.41245	3.62701	0.925382	3.16249	5.23274	3.73413	2.07639	2.65255	2.98553	2.58408	2.95356	2.91404	3.22976	3.76601	3.2118	2.94866	2.05702	3.54323	3.92832	2.70317	1.57836	4.91224	4.87705	4.04268	2.3922	2.96058	3.02084	2.19117	3.06795	3.69346	3.39379	3.31374	2.42895	3.5658	4.06583	4.79416	0.862495
Cell_0051	AMPKARt2	Insulin 10000 ng/ml	0.232078	0.59161	0.528704	0.547584	0.718235	0.403779	0.515392	0.583813	0.369965	0.3596	0.453436	0.503473	0.249562	0.483069	0.434777	0.466473	0.351475	0.355408	0.443646	0.349255	0.463466	0.513932	0.628922	0.594358	0.479098	0.478095	0.309759	0.670469	0.436279	0.383715	0.475266	0.5194	0.495187	0.372141	0.629769	0.459787	0.48856	0.559757	0.50159	0.588931	0.480956	0.360937	0.572194	0.693598	0.471029	0.568407	0.332822
Cell_0052	TFEB_TR	Insulin 10000 ng/ml	2.11103	1.74345	0.507463	1.65722	0.473604	1.26979	1.5632	0.966547	1.35022	3.29491	1.50679	3.23945	1.17681	2.08292	2.59874	2.05842	0.815415	0.804891	1.62278	1.83662	2.28887	2.11425	4.93444	1.18317	1.42249	0.766268	2.21717	0.976523	1.95118	1.25809	1.1883	3.68476	1.5884	2.36192	0.961763	0.834689	1.72531	1.0163	1.1904	2.05774	1.19487	3.1457	0.40115	1.22148	2.28958	1.3512	1.63619
Cell_0052	FOXO_TR	Insulin 10000 ng/ml	2.47463	2.9436	3.51833	3.15461	1.89806	3.41818	3.63035	3.02236	2.73157	3.66534	3.14398	3.46792	0.814839	3.10475	4.82324	3.6388	2.16267	4.43706	3.00275	2.51285	3.00462	2.78655	3.39564	3.67358	3.2463	3.10972	1.93629	3.4221	3.82599	3.10767	1.65946	4.36418	4.76753	4.0562	2.37312	3.07792	3.0306	2.23142	2.91177	3.76655	3.46172	3.41941	2.38923	3.22382	4.05499	4.82566	0.868953
Cell_0052	AMPKARt2	Insulin 10000 ng/ml	0.250841	0.591576	0.550863	0.547366	0.708476	0.461	0.484615	0.581965	0.37793	0.345494	0.431662	0.488753	0.232109	0.482554	0.400002	0.459835	0.36325	0.324269	0.424673	0.415582	0.464047	0.459475	0.600613	0.606662	0.474509	0.464819	0.318714	0.686407	0.450605	0.414771	0.484057	0.524042	0.525564	0.38884	0.63681	0.472781	0.531788	0.567937	0.50024	0.567751	0.492595	0.335507	0.586821	0.680984	0.454152	0.559485	0.315208
Cell_0053	TFEB_TR	Insulin 10000 ng/ml	1.71391	2.18942	0.50412	2.13397	0.461663	1.16768	1.56412	1.05838	1.41908	0.99301	1.54902	3.75539	1.28803	2.13782	2.64095	2.0248	0.763368	0.880322	1.66883	3.24997	2.57812	1.63152	1.77453	1.24516	1.44248	0.842112	1.59372	1.06761	2.03991	1.72718	1.17838	2.92912	1.79779	2.20241	0.893238	0.973834	1.76018	0.9526	0.87259	2.09879	1.1038	3.2823	0.441438	1.31288	2.2137	1.03894	1.70736
Cell_0053	FOXO_TR	Insulin 10000 ng/ml	2.03154	2.88816	3.53248	3.15078	1.77248	3.28642	3.54248	2.74053	2.74004	2.64308	3.24902	3.56052	0.762499	3.2973	5.11271	3.5241	1.97586	4.08836	3.01603	2.6515	3.54417	2.92208	3.34433	3.97705	3.40288	3.06317	1.92797	3.99357	3.73991	3.01506	1.69197	4.46565	4.89161	3.68376	2.50543	3.16175	3.08992	2.19914	3.01687	3.6638	3.57203	3.40381	2.26091	3.31174	4.03298	4.60797	1.15011
Cell_0053	AMPKARt2	Insulin 10000 ng/ml	0.25919	0.583037	0.521201	0.537856	0.694867	0.471755	0.477255	0.548252	0.354658	0.630961	0.415064	0.490477	0.244507	0.462149	0.405289	0.470061	0.3413	0.35808	0.426381	0.439999	0.455224	0.454131	0.616266	0.57577	0.481899	0.456006	0.302959	0.703549	0.412252	0.404932	0.502835	0.520458	0.526308	0.366817	0.631305	0.485518	0.543854	0.564433	0.514845	0.56221	0.521633	0.315708	0.581388	0.668534	0.445143	0.58147	0.275041
Cell_0054	TFEB_TR	Insulin 10000 ng/ml	1.64932	1.49434	0.52896	1.96493	0.477172	1.0729	1.56172	1.08064	1.67555	1.07648	1.56519	3.15791	1.07131	2.12023	2.98853	2.04016	0.79949	0.877623	1.69298	3.29315	2.80449	2.68777	2.07222	1.02646	1.40134	0.921411	1.91274	1.3102	2.15247	1.51631	1.34761	3.67412	1.70766	1.96066	0.829367	1.07088	1.47032	0.967514	1.17208	2.1125	0.983164	3.6023	0.509112	1.08806	2.46648	1.2149	2.19412
Cell_0054	FOXO_TR	Insulin 10000 ng/ml	2.30642	2.94003	3.74181	3.21183	1.73485	3.24128	3.37248	2.92365	2.75461	2.48765	3.17875	3.53491	0.658759	3.46833	4.3953	3.77644	2.1881	3.55581	3.07367	2.584	3.5452	2.9316	3.50327	3.81848	3.18757	3.03114	2.04486	3.88874	3.92415	2.60425	1.88898	4.43397	4.85153	3.71601	2.58834	3.16546	3.2236	2.15426	3.07195	3.33176	3.32896	3.43946	2.25739	2.86608	4.08316	4.48397	1.23524
Cell_0054	AMPKARt2	Insulin 10000 ng/ml	0.25214	0.585356	0.528178	0.54925	0.707441	0.482014	0.464691	0.552441	0.362086	0.624049	0.41245	0.501426	0.26224	0.481191	0.330017	0.442322	0.33577	0.316739	0.432166	0.476275	0.453783	0.423105	0.582968	0.583938	0.500833	0.453473	0.304333	0.694788	0.386478	0.410384	0.490647	0.53194	0.54163	0.369819	0.598978	0.425671	0.575748	0.532787	0.48618	0.555212	0.519724	0.311652	0.600855	0.5875	0.441685	0.549999	0.26313
Cell_0055	TFEB_TR	Insulin 10000 ng/ml	1.79254	1.78095	0.534185	1.44909	0.464797	1.02761	1.59551	1.04311	1.39522	1.10004	1.62386	3.26318	1.10328	2.15777	0.501249	2.05966	1.57523	0.83025	1.70952	2.31993	3.22275	2.13356	2.16584	0.790623	1.33793	0.946416	1.50286	0.992688	2.12936	1.27655	1.24183	2.14249	1.86911	2.14739	0.911532	1.19028	1.53262	0.9879	0.917264	1.83223	0.882285	3.48891	0.474666	1.34758	2.31078	1.31956	1.95573
Cell_0055	FOXO_TR	Insulin 10000 ng/ml	2.59654	2.90819	3.79919	3.0992	1.66739	3.2524	3.38757	3.34406	2.87947	2.35067	3.25542	3.59726	0.656302	3.40846	2.61464	3.77271	2.53645	3.36543	3.12992	2.56561	3.98838	2.97634	3.80019	3.6901	3.16101	3.22393	2.09442	4.1961	3.69226	2.6053	1.75267	4.38565	4.96614	3.84457	2.80633	3.24279	3.13934	1.98517	2.81175	3.47832	3.24135	3.44197	2.34259	3.44469	3.83113	4.59977	1.32919
Cell_0055	AMPKARt2	Insulin 10000 ng/ml	0.207937	0.588225	0.540111	0.543309	0.702455	0.482613	0.451289	0.528512	0.387286	0.608537	0.403563	0.475195	0.23018	0.481014	0.692216	0.437309	0.314593	0.329132	0.429695	0.469342	0.446339	0.420951	0.608071	0.645824	0.537087	0.450222	0.302941	0.714693	0.401831	0.439614	0.48919	0.576068	0.515345	0.373282	0.589573	0.441617	0.564493	0.542347	0.456623	0.559234	0.513484	0.312754	0.580417	0.620201	0.452974	0.561864	0.269292
Cell_0056	TFEB_TR	Insulin 10000 ng/ml	2.53476	2.39668	0.551133	1.35536	0.467314	0.95629	1.56327	1.10972	1.79244	1.13232	1.63976	2.65823	1.14979	1.96723	0.506987	2.14965	0.984968	0.822478	1.71218	1.85014	2.80137	1.7122	2.02962	1.16171	1.22532	0.938174	1.30454	1.51113	1.90953	1.45659	1.10859	3.1691	1.96486	2.08368	0.944373	1.29986	1.63693	1.08807	1.10592	1.91879	0.826869	3.36718	0.453194	1.16032	2.44683	1.26835	2.47211
Cell_0056	FOXO_TR	Insulin 10000 ng/ml	2.71417	3.03596	4.09125	2.92546	1.70066	3.23913	3.18923	2.84531	2.69064	2.12038	3.30755	3.46365	0.770324	3.14178	2.54842	3.85721	2.20785	3.84066	3.08008	2.64275	3.24673	2.90978	3.65775	3.73089	3.12465	3.16937	2.12428	4.50611	3.00532	2.54887	1.67845	4.59235	4.6925	3.71119	2.96347	3.22954	3.06197	1.90526	2.98556	3.22114	3.18758	3.45689	2.43231	3.24124	3.85217	4.70803	1.55624
Cell_0056	AMPKARt2	Insulin 10000 ng/ml	0.237038	0.558687	0.538256	0.542115	0.687515	0.469236	0.475913	0.516728	0.429404	0.602499	0.395156	0.442966	0.227447	0.479297	0.666544	0.445087	0.324067	0.348156	0.420508	0.448926	0.45672	0.424791	0.628802	0.582094	0.540986	0.43085	0.287836	0.545471	0.388915	0.404229	0.520237	0.599425	0.544275	0.376031	0.590731	0.43342	0.56665	0.562178	0.498038	0.552337	0.529529	0.319415	0.586059	0.618661	0.479788	0.555914	0.255843
Cell_0057	TFEB_TR	Insulin 10000 ng/ml	2.15914	2.33186	0.566176	2.00979	0.483559	0.961577	1.50383	1.41477	1.44904	1.13378	1.62698	2.69576	1.30924	1.78252	0.507609	2.18043	0.871014	0.785075	1.65958	0.755321	2.66679	2.04256	2.00426	1.21074	1.08405	0.954029	1.43064	1.53938	2.07844	1.68479	1.01172	4.61328	1.35275	2.06091	1.03262	1.40944	1.37001	0.984143	0.958336	1.97439	0.760082	3.3573	0.485964	1.3734	2.222	1.42901	2.81881
Cell_0057	FOXO_TR	Insulin 10000 ng/ml	2.52701	3.05472	3.7454	2.92643	1.87045	3.29569	3.25439	2.71821	2.77326	1.97322	3.206	3.43562	0.856054	2.73074	2.50622	3.97426	2.21415	3.85529	2.8748	1.97988	3.26418	3.111	3.89149	3.86363	2.76974	3.36998	1.82342	4.51532	3.54895	2.33526	1.59116	4.93022	5.03447	3.75406	2.96612	3.2163	3.2023	1.83926	3.17178	3.1897	3.13385	3.37514	2.48958	3.31578	3.4967	4.55315	1.75675
Cell_0057	AMPKARt2	Insulin 10000 ng/ml	0.240336	0.566257	0.511909	0.556008	0.697712	0.447468	0.549437	0.535937	0.45859	0.614433	0.391145	0.439029	0.247346	0.467253	0.671026	0.443297	0.326437	0.369648	0.429762	0.601071	0.470113	0.431917	0.603032	0.57671	0.536722	0.422869	0.325412	0.528691	0.41091	0.406263	0.521027	0.608687	0.513522	0.411007	0.569254	0.425224	0.57274	0.549427	0.491203	0.542851	0.540591	0.320379	0.585465	0.626236	0.535244	0.561849	0.259221
Cell_0058	TFEB_TR	Insulin 10000 ng/ml	2.0119	2.03116	0.56251	1.45698	0.493275	1.00507	1.3281	0.936846	1.26018	1.16992	1.58999	3.88049	1.38076	1.80424	0.476775	2.1402	0.823167	0.87219	1.68098	0.774508	2.42106	1.93812	2.12284	1.12705	1.07385	0.939956	1.50621	1.96813	1.90653	1.74305	0.938733	2.11742	1.96864	1.98888	1.02786	1.52636	1.69794	0.90035	0.949587	1.74689	0.768774	3.51292	0.558227	1.33379	1.86155	1.48358	2.82791
Cell_0058	FOXO_TR	Insulin 10000 ng/ml	2.1947	2.94703	4.03948	2.89822	1.8995	3.2116	3.28085	2.90329	2.83914	1.93362	3.10394	3.66384	0.972752	2.76785	2.41621	3.7445	2.13016	3.69508	2.8589	2.08188	3.3422	3.07425	3.99155	3.55318	3.0403	3.45089	2.16114	4.37999	3.16367	2.1504	1.63	4.61968	5.27839	3.79029	2.8549	3.16233	3.06373	1.57362	3.07958	3.21356	3.36029	3.32513	2.42834	3.38716	2.99045	4.54675	1.79505
Cell_0058	AMPKARt2	Insulin 10000 ng/ml	0.204136	0.567223	0.544337	0.564586	0.711831	0.437948	0.60492	0.567913	0.454474	0.609456	0.397369	0.431454	0.245909	0.479556	0.687438	0.436178	0.312103	0.322302	0.429769	0.63106	0.482641	0.413356	0.569681	0.591316	0.521078	0.437656	0.412101	0.507901	0.394953	0.324201	0.494851	0.615643	0.475301	0.431649	0.587199	0.405402	0.542541	0.542599	0.463562	0.555142	0.495775	0.345849	0.57686	0.6384	0.580683	0.577335	0.267113
Cell_0059	TFEB_TR	Insulin 10000 ng/ml	1.73754	1.91286	0.536694	1.85225	0.477546	1.12305	0.90913	1.02188	1.65474	1.18297	1.57445	2.36112	1.62032	1.83398	0.487624	2.13895	0.738759	0.819188	1.56422	0.78685	2.56049	1.28222	2.25615	1.13437	0.695663	1.0059	1.50972	1.73608	1.99791	1.49439	0.742271	1.79637	1.82496	1.8153	1.08889	1.50029	1.56712	0.941289	1.29336	1.79586	0.789883	3.10197	0.521435	1.49608	1.81794	1.56377	2.86228
Cell_0059	FOXO_TR	Insulin 10000 ng/ml	2.08172	2.96884	3.79711	2.91765	2.00696	3.24452	2.3015	2.99861	2.88561	2.2676	3.24006	3.4121	1.28357	2.89416	2.31096	3.72888	2.13955	3.55777	2.51776	2.10353	3.83591	2.85352	4.042	3.67527	1.63835	3.30495	2.07924	4.44327	3.3309	2.0876	1.5588	4.36104	6.06328	3.83675	2.91077	3.29143	3.03888	1.34553	3.14497	3.2546	3.30327	3.44739	2.27412	3.29296	2.97827	4.4869	1.7528
Cell_0059	AMPKARt2	Insulin 10000 ng/ml	0.216259	0.574913	0.52973	0.56485	0.700259	0.432227	0.596499	0.570443	0.41937	0.616061	0.40822	0.434007	0.254733	0.472029	0.690554	0.434029	0.319546	0.261575	0.423732	0.609999	0.462871	0.419859	0.574286	0.596624	0.590925	0.408571	0.360068	0.514579	0.406295	0.274215	0.467847	0.633635	0.442135	0.414982	0.573845	0.395805	0.532986	0.551628	0.474964	0.545541	0.498391	0.393405	0.604612	0.61347	0.575423	0.575172	0.273137
Cell_0060	TFEB_TR	Insulin 10000 ng/ml	2.36736	1.82158	0.498935	1.4456	0.502248	1.15691	1.00997	0.75823	1.56049	1.25575	1.50297	2.55727	1.76242	1.83513	0.479137	2.17694	0.721327	0.883099	1.43203	0.828497	2.93096	1.14913	2.66998	1.09644	1.16514	1.02768	1.48927	1.66509	1.94398	1.54832	0.916449	1.69681	2.22194	1.79635	1.08768	1.55489	1.56586	0.99846	1.10312	1.87421	0.828341	2.87551	0.480542	1.42851	1.75502	1.48144	2.53402
Cell_0060	FOXO_TR	Insulin 10000 ng/ml	2.48032	3.09363	3.87648	2.71807	2.23734	3.13542	2.85412	2.9547	2.75807	2.37123	3.24289	3.51068	1.91309	2.89292	2.41603	3.56687	1.90247	4.39899	2.27347	2.14189	3.90899	2.92603	4.06843	3.51869	1.66895	3.45534	1.98981	4.27619	3.42519	2.36579	1.63183	4.21452	6.38832	3.69867	2.83344	3.10779	3.05267	1.71267	3.01338	3.31541	3.44375	3.56231	2.22496	3.32138	3.00394	4.10853	1.91207
Cell_0060	AMPKARt2	Insulin 10000 ng/ml	0.216542	0.581911	0.540717	0.577355	0.698955	0.417317	0.640849	0.551288	0.416846	0.629337	0.460712	0.49344	0.266378	0.476222	0.674833	0.428813	0.298042	0.333535	0.44065	0.615045	0.477554	0.428383	0.547965	0.573597	0.574198	0.417969	0.420499	0.493044	0.379933	0.290966	0.455896	0.644705	0.429668	0.395894	0.573135	0.403244	0.526098	0.441838	0.46416	0.604169	0.501401	0.422652	0.587254	0.640613	0.552666	0.590553	0.30543
Cell_0061	TFEB_TR	Insulin 10000 ng/ml	1.75352	1.9688	0.516059	1.66335	0.524483	1.23379	0.918218	0.783028	1.25913	1.25838	1.29972	2.18264	1.6146	1.81391	0.51245	2.10673	1.02197	0.892662	1.39781	0.832112	2.53582	1.99959	3.11636	1.03324	0.602114	1.05014	1.79166	1.89983	1.89691	1.31015	0.680015	3.67552	2.23593	1.86866	1.19878	1.60816	1.61603	1.07608	1.22314	1.93728	0.876623	3.00366	0.785346	1.45118	1.91557	1.38971	2.38865
Cell_0061	FOXO_TR	Insulin 10000 ng/ml	2.515	3.04804	4.14389	2.74591	2.24287	3.03976	2.76384	3.15929	2.80575	2.71642	2.97525	3.48297	1.89655	2.91906	2.6826	3.4432	2.0869	4.11314	2.31684	2.34224	4.01613	2.80346	3.88463	3.28643	1.80799	3.49655	1.79976	4.0934	3.37095	1.50939	1.33701	4.79762	5.93523	3.67048	2.80403	3.18818	2.88629	1.69196	2.94539	3.3752	3.46715	3.77903	2.2553	3.24405	3.20858	4.33138	1.76956
Cell_0061	AMPKARt2	Insulin 10000 ng/ml	0.211867	0.569177	0.536635	0.600248	0.693225	0.419262	0.636097	0.550121	0.422372	0.649356	0.513437	0.520143	0.2877	0.473287	0.680141	0.426508	0.29589	0.314545	0.429642	0.596945	0.473996	0.469756	0.533033	0.567403	0.559996	0.400013	0.397625	0.471037	0.417842	0.561478	0.441464	0.640308	0.415104	0.387619	0.55208	0.406031	0.509569	0.382748	0.488902	0.62601	0.487899	0.410405	0.613008	0.621091	0.54819	0.593408	0.397156
Cell_0062	TFEB_TR	Insulin 10000 ng/ml	3.54333	1.62848	0.552515	2.01252	0.543225	1.29639	0.898927	0.954051	1.74185	1.17788	1.17125	2.79158	1.91742	1.7459	0.514026	2.07111	0.963581	0.984102	1.33572	0.83825	2.48045	1.14833	3.14053	1.04091	1.07199	1.06971	1.10518	1.7934	1.89477	1.43692	0.753523	3.24159	2.42673	1.99438	1.17093	1.3976	1.18511	1.23777	1.0593	1.80033	0.944016	3.00857	0.567205	1.258	1.74607	1.45168	2.4668
Cell_0062	FOXO_TR	Insulin 10000 ng/ml	2.59694	3.02942	3.77757	2.9039	2.14231	3.08809	3.06914	2.94796	2.85287	2.7585	3.03285	3.41448	1.87403	2.80966	2.54739	3.54738	2.05777	4.13759	2.28928	2.33839	3.94517	2.68957	4.05126	3.26888	1.98289	3.55341	1.2689	4.04682	3.723	1.48759	1.42103	4.62057	5.67513	3.79132	2.76327	3.18604	3.26564	1.82522	3.14296	3.13107	3.42207	4.03174	3.30526	3.11715	3.25611	4.30477	2.23821
Cell_0062	AMPKARt2	Insulin 10000 ng/ml	0.263258	0.583884	0.541992	0.579608	0.673748	0.433311	0.640687	0.561159	0.401542	0.641012	0.522936	0.523817	0.287956	0.475128	0.682394	0.413783	0.310684	0.337896	0.44042	0.61025	0.466101	0.520296	0.508712	0.571829	0.541091	0.40893	0.323761	0.48442	0.430195	0.573282	0.427351	0.655119	0.384912	0.382994	0.541371	0.406178	0.522229	0.36038	0.525962	0.646981	0.484449	0.42626	0.537788	0.607664	0.543748	0.597494	0.446456
Cell_0063	TFEB_TR	Insulin 10000 ng/ml	1.79672	2.45123	0.538482	1.52286	0.540514	1.38882	0.942664	0.800319	2.13435	1.23922	1.07228	2.22703	2.17888	1.69929	0.560196	2.24471	0.691928	0.993194	1.30684	0.930778	2.22398	1.33725	2.51394	1.06394	0.959304	1.01775	1.26269	2.01698	1.65041	1.39092	0.77846	2.24295	2.24359	2.0358	0.627075	1.62994	1.61907	1.13484	1.47576	1.75745	0.958189	2.82242	0.593909	1.06482	1.86239	1.56114	3.03028
Cell_0063	FOXO_TR	Insulin 10000 ng/ml	2.49838	2.99289	3.8676	2.80811	2.06772	3.09745	3.08763	2.73715	2.94267	3.10175	3.05376	3.43719	1.85522	2.7718	2.52965	3.82504	1.94163	4.32521	2.28729	2.53572	3.74624	2.93013	3.97468	3.26297	1.9131	3.46602	1.21329	4.162	3.09636	1.66881	1.57336	4.65424	5.27964	3.6556	3.74771	3.01436	2.86688	2.11682	2.88557	3.18196	3.21228	4.30397	3.44033	2.99025	3.3651	4.26257	2.13497
Cell_0063	AMPKARt2	Insulin 10000 ng/ml	0.244228	0.596116	0.542042	0.60301	0.689215	0.436824	0.662689	0.529239	0.40032	0.63505	0.527733	0.529138	0.306795	0.474086	0.694808	0.422926	0.339495	0.327684	0.445769	0.61792	0.471368	0.543743	0.526549	0.563057	0.394856	0.45052	0.311173	0.473757	0.446398	0.573068	0.386528	0.644083	0.407638	0.338305	0.653936	0.408969	0.516807	0.335265	0.554706	0.619191	0.46847	0.445921	0.46578	0.594237	0.506211	0.594099	0.47145
Cell_0064	TFEB_TR	Insulin 10000 ng/ml	2.21517	2.05293	0.519669	1.55256	0.530908	1.33982	0.934575	0.722148	2.3737	1.42026	1.00289	1.95684	1.54428	1.70086	0.549706	2.23505	0.690905	1.04668	1.24637	0.907827	2.4463	1.47353	2.40463	1.02683	1.78381	0.979155	1.6382	2.18139	1.82192	1.32557	0.951519	2.97088	2.2018	2.01811	0.501453	1.59805	1.56233	1.3357	1.34655	1.5799	0.980431	2.60808	0.627411	1.14435	2.07025	1.63889	2.54645
Cell_0064	FOXO_TR	Insulin 10000 ng/ml	2.59548	2.99818	4.03018	2.69771	2.06007	3.14565	3.26424	3.12548	3.04272	3.06426	2.99885	3.60513	1.49658	2.88865	2.31832	3.61161	2.23733	4.18592	2.16622	2.5563	3.45761	2.85323	3.94864	3.40591	2.01149	3.56709	1.3655	3.82045	3.75265	1.4983	1.58054	4.81447	5.20805	3.83342	3.74364	2.92093	2.98973	2.26473	3.01115	3.18318	3.21988	4.28725	3.66426	3.18872	3.56751	4.18579	2.03081
Cell_0064	AMPKARt2	Insulin 10000 ng/ml	0.234637	0.602804	0.548929	0.588317	0.71001	0.407856	0.645252	0.547738	0.393749	0.610129	0.522021	0.532833	0.319204	0.477891	0.687198	0.426102	0.384508	0.318692	0.453164	0.582908	0.469714	0.538975	0.511693	0.602603	0.428722	0.469414	0.339614	0.491769	0.425045	0.58356	0.406062	0.63886	0.409237	0.354816	0.625851	0.484126	0.532685	0.329599	0.56266	0.586028	0.457271	0.441633	0.449459	0.556236	0.482504	0.575213	0.459637
Cell_0065	TFEB_TR	Insulin 10000 ng/ml	1.66621	1.62199	0.500402	1.57672	0.522821	1.29221	0.994376	0.680952	2.10161	1.25151	0.949775	3.00414	1.37113	1.71481	0.567688	2.27412	1.09784	1.10738	1.23687	0.916957	2.66464	1.65881	2.74105	1.09089	1.46404	0.935251	1.57647	1.82838	1.82252	1.21997	0.998612	3.69881	2.25239	2.03722	0.449711	1.47228	1.42282	1.23243	1.5509	0.576287	1.0751	2.77011	0.709184	1.19005	1.94537	1.42666	2.8848
Cell_0065	FOXO_TR	Insulin 10000 ng/ml	2.24832	2.95746	3.81161	2.8056	2.18778	3.16248	3.35982	3.29615	2.88815	2.79908	2.99221	3.76546	1.41324	2.98067	2.52174	3.69543	2.38413	4.2721	2.15767	2.40103	3.4234	2.99669	4.19636	3.77724	2.23664	3.51104	1.38646	4.09497	3.8671	1.39655	1.66363	4.97469	5.58489	3.69077	3.94733	2.97062	2.92626	2.29449	3.06614	3.2061	3.21143	4.41941	3.56699	3.3345	3.47151	4.27276	2.09183
Cell_0065	AMPKARt2	Insulin 10000 ng/ml	0.223117	0.603781	0.547161	0.59262	0.704351	0.41618	0.642316	0.548049	0.382944	0.625361	0.503473	0.523934	0.323325	0.480665	0.689782	0.447661	0.418869	0.338061	0.45992	0.589562	0.463732	0.513397	0.500739	0.595283	0.441455	0.467652	0.342477	0.51363	0.429863	0.601315	0.421811	0.633636	0.409766	0.35815	0.653597	0.494968	0.536523	0.417161	0.565394	0.662209	0.483907	0.445153	0.452914	0.560465	0.484526	0.583051	0.411731
Cell_0066	TFEB_TR	Insulin 10000 ng/ml	1.55638	2.18179	0.582947	1.53512	0.539623	1.28785	1.05788	0.955145	1.74909	1.23774	0.978909	2.54872	1.35036	1.69196	0.585051	2.10834	1.1973	1.00033	1.29119	0.966072	2.67746	1.63109	3.0572	0.933674	1.96387	0.908857	1.60015	1.78653	1.82953	1.43297	1.02592	3.41643	2.24696	2.12581	0.469309	1.1928	1.31543	0.826967	1.34339	0.616938	1.04554	2.47786	0.667393	1.46162	1.80843	1.40811	3.27662
Cell_0066	FOXO_TR	Insulin 10000 ng/ml	2.26165	2.88371	3.55122	2.76152	2.51344	3.07816	3.33471	3.59897	3.08787	2.67434	3.01826	3.85416	1.20562	2.97729	2.3514	3.45135	2.589	4.21215	2.19447	2.41242	3.42587	3.26853	4.024	3.24368	2.1557	3.58418	1.51646	4.20322	3.85501	1.44961	1.67518	4.64674	5.81718	3.80669	3.78388	2.77989	3.01163	1.77013	2.76089	3.11279	3.11022	4.58451	3.53558	3.3215	3.37792	4.03831	2.01763
Cell_0066	AMPKARt2	Insulin 10000 ng/ml	0.232086	0.600605	0.515297	0.602853	0.691898	0.423247	0.626318	0.561531	0.402302	0.613319	0.487136	0.526276	0.334309	0.486057	0.694616	0.424178	0.43801	0.33528	0.449539	0.610442	0.472884	0.513967	0.488161	0.625102	0.448999	0.44698	0.339937	0.592563	0.435077	0.607086	0.405588	0.630203	0.405065	0.344721	0.616618	0.527772	0.582905	0.454856	0.549151	0.653237	0.479506	0.447824	0.444521	0.632688	0.472474	0.57954	0.339431
Cell_0067	TFEB_TR	Insulin 10000 ng/ml	2.22504	2.00242	0.613678	1.62143	0.580766	1.3256	1.17632	0.728677	2.47552	1.38469	1.06024	2.75685	1.29255	1.70508	0.542306	2.18523	1.05415	1.02013	1.24819	0.99576	2.61763	1.76696	3.57525	0.996041	1.39856	0.866839	1.85533	1.82106	1.81595	1.34797	0.95953	2.55136	1.99013	2.09259	0.555483	1.2169	1.31385	0.912505	1.19731	0.877508	1.04635	2.53119	0.714177	1.36401	2.01722	1.32437	3.29814
Cell_0067	FOXO_TR	Insulin 10000 ng/ml	2.55607	2.94634	3.53469	2.8857	2.71924	3.11318	3.66944	3.55567	2.82088	2.99018	2.93804	3.84495	1.05108	3.10249	2.06549	3.7089	2.79191	3.91753	2.03832	2.3173	3.41618	2.98176	4.05789	3.5025	2.03042	3.50717	1.59271	3.66189	3.98288	1.382	1.64913	4.08675	5.39585	3.60152	3.93895	2.78034	2.9653	1.92259	2.94998	3.09943	3.06135	4.33561	3.46103	3.36793	2.95823	3.97128	2.40085
Cell_0067	AMPKARt2	Insulin 10000 ng/ml	0.216585	0.594647	0.501266	0.592356	0.708706	0.402771	0.62361	0.562328	0.407347	0.6188	0.465221	0.519887	0.342886	0.493341	0.705657	0.429726	0.455029	0.320648	0.448517	0.60279	0.469592	0.491566	0.523285	0.600041	0.51891	0.452083	0.333406	0.57987	0.436357	0.594357	0.402175	0.640611	0.449395	0.351312	0.642253	0.527832	0.608486	0.449017	0.50758	0.633788	0.457038	0.432986	0.429391	0.589295	0.63367	0.58274	0.330854
Cell_0068	TFEB_TR	Insulin 10000 ng/ml	1.869	2.30817	0.60979	1.77161	0.567907	1.38636	1.33611	0.895918	2.02981	1.43981	1.07534	3.13584	1.09522	1.71544	0.555443	2.07348	1.58893	1.04368	1.2551	1.08779	3.06538	1.63996	3.10597	1.02051	1.68644	0.887446	2.38755	1.86962	1.72336	1.16175	1.10136	5.70042	1.72657	2.05938	0.445869	1.22873	1.37413	0.977518	1.2956	0.760207	1.06289	2.58137	0.773719	1.57833	2.50165	1.34452	3.53372
Cell_0068	FOXO_TR	Insulin 10000 ng/ml	2.3493	2.86326	3.64937	2.81755	2.44376	3.06823	3.62304	3.53556	2.82336	3.03198	2.69778	3.90565	0.981004	3.08195	2.05748	3.41052	2.52812	4.31219	2.08345	2.37735	3.44448	3.1232	3.9271	3.67736	2.2442	3.51476	1.8643	4.05375	3.78903	1.29878	1.71082	4.45465	5.31357	3.39635	3.72819	2.78783	3.041	1.78668	2.86664	2.94521	3.12089	4.04433	3.24527	3.6085	2.79583	3.89763	2.64378
Cell_0068	AMPKARt2	Insulin 10000 ng/ml	0.219678	0.596096	0.482541	0.57225	0.697937	0.403641	0.603381	0.56666	0.382442	0.618319	0.462892	0.517914	0.340413	0.490219	0.702719	0.428841	0.44572	0.323206	0.454065	0.609674	0.446459	0.466014	0.519457	0.609925	0.554478	0.438975	0.341495	0.591475	0.435569	0.600615	0.433771	0.629531	0.522993	0.357903	0.637266	0.544294	0.586896	0.448721	0.508334	0.647303	0.456174	0.385724	0.432905	0.597888	0.610793	0.589599	0.332354
Cell_0069	TFEB_TR	Insulin 10000 ng/ml	2.03709	2.30085	0.572227	1.62664	0.561582	1.39823	1.50936	1.00698	2.00835	1.40852	1.09505	2.96044	1.07059	1.73727	0.540275	2.08755	1.62342	0.987067	1.30927	1.16004	2.94378	2.29154	3.75839	0.988635	0.91129	0.89125	1.90636	2.40693	1.86865	1.74134	1.14288	3.71405	1.86723	1.98843	0.44811	1.23795	1.41401	0.807298	1.09903	0.773924	1.02168	2.60148	1.03012	1.39491	2.11161	1.14764	3.4831
Cell_0069	FOXO_TR	Insulin 10000 ng/ml	2.30888	2.83672	3.29681	2.98916	2.28829	3.13327	3.56669	3.37802	3.02417	2.80293	2.70308	3.59398	1.03068	2.97009	2.03658	3.40608	2.39667	4.17922	2.23942	2.55195	3.41492	3.11676	4.13902	3.65482	2.15946	3.74162	1.94668	4.43345	3.7975	1.27063	1.85353	3.9957	5.50298	3.43113	3.34538	2.74994	3.08125	1.86363	2.78532	2.85023	3.00104	4.22288	3.19108	3.32656	2.79472	3.42132	2.70365
Cell_0069	AMPKARt2	Insulin 10000 ng/ml	0.221068	0.58499	0.52726	0.576838	0.71053	0.406419	0.575066	0.583811	0.405229	0.610372	0.465891	0.499621	0.345089	0.488065	0.694469	0.433092	0.445966	0.315346	0.45235	0.619574	0.44616	0.44599	0.500407	0.620772	0.552304	0.420148	0.350634	0.588854	0.412253	0.624694	0.502921	0.629225	0.504829	0.361605	0.630565	0.519917	0.573058	0.404972	0.514277	0.6275	0.458396	0.409122	0.395847	0.632477	0.61077	0.599896	0.324461
Cell_0070	TFEB_TR	Insulin 10000 ng/ml	1.98843	2.57069	0.551713	1.938	0.619625	1.36069	1.52955	0.903689	2.14301	1.65868	0.988417	2.76107	1.20824	1.67277	0.545751	2.06124	1.59759	0.929787	1.2847	1.2404	2.56855	1.47159	4.05108	1.06292	1.78946	0.931687	2.25985	3.07735	1.80068	1.12922	1.46732	3.47566	1.64701	2.12661	0.508466	1.36531	1.74201	0.947839	1.00439	0.866216	1.08822	2.78792	0.88173	1.42305	2.07002	1.18113	4.3376
Cell_0070	FOXO_TR	Insulin 10000 ng/ml	2.47311	2.8271	3.30453	3.06781	2.37541	3.0962	3.46432	3.19993	3.00631	2.98074	2.73875	3.79433	1.02044	2.87985	2.00416	3.41281	2.96692	3.61156	2.21353	2.65978	3.38274	3.18605	4.14999	3.71069	2.33945	3.6721	2.18833	4.64161	3.91852	1.15698	1.98784	3.67518	5.44154	3.58986	3.61698	3.02267	2.92693	1.92641	2.82359	2.76838	3.27397	4.3286	3.32218	3.22083	2.90925	3.81092	2.6521
Cell_0070	AMPKARt2	Insulin 10000 ng/ml	0.211918	0.584855	0.523109	0.585633	0.720049	0.387475	0.549656	0.587767	0.414606	0.585855	0.474006	0.525676	0.348288	0.494315	0.695832	0.447202	0.44021	0.342391	0.44173	0.611984	0.469194	0.427876	0.500347	0.621697	0.569905	0.456874	0.353957	0.585325	0.41641	0.618827	0.514417	0.630556	0.521724	0.341392	0.664205	0.518419	0.561086	0.390818	0.511253	0.621172	0.48898	0.413197	0.403584	0.6447	0.601762	0.588793	0.320827
Cell_0071	TFEB_TR	Insulin 10000 ng/ml	2.00651	2.26155	0.529127	1.67934	0.668559	1.39282	1.55568	0.869766	1.20522	1.48767	0.948943	4.22952	1.20288	1.68959	0.529495	2.05009	1.39088	0.927285	1.2975	1.42092	2.37006	1.39147	2.95973	1.04524	1.11334	0.909739	2.38979	1.82808	1.68988	1.04256	1.05899	5.10118	1.57485	2.05085	0.521454	1.25772	1.34106	1.06504	1.19979	0.802712	0.973399	2.65263	0.958391	1.36805	2.02842	1.30385	3.27762
Cell_0071	FOXO_TR	Insulin 10000 ng/ml	2.40193	2.83562	3.90557	3.07755	3.51667	3.24171	3.50851	2.99504	2.97586	2.57655	3.00162	3.7755	0.912744	2.97058	2.01834	3.35197	2.95828	3.71417	2.31805	2.90895	3.40622	2.97252	3.98455	3.44688	2.37468	3.83802	1.95346	4.71609	3.60464	1.24007	1.87288	3.31398	5.52896	3.73075	3.35831	3.10461	3.15272	2.16681	2.81422	2.8083	3.07607	4.22042	3.5089	3.24428	3.02379	3.80821	3.1475
Cell_0071	AMPKARt2	Insulin 10000 ng/ml	0.214533	0.578441	0.53089	0.567565	0.658451	0.407045	0.531572	0.580919	0.427465	0.599495	0.464927	0.511601	0.31568	0.491648	0.69163	0.44235	0.436298	0.389167	0.451806	0.593422	0.480944	0.418578	0.49836	0.593664	0.566072	0.471682	0.368316	0.575845	0.397424	0.632666	0.530305	0.627682	0.520519	0.371942	0.631572	0.528283	0.531958	0.368953	0.48275	0.619525	0.535809	0.414299	0.395046	0.636204	0.592754	0.610762	0.307533
Cell_0072	TFEB_TR	Insulin 10000 ng/ml	1.80218	1.99685	0.52276	2.06308	0.7756	1.3533	1.63368	0.762416	1.45003	1.4406	0.962571	2.73573	1.26939	1.71693	0.548387	2.06796	1.70858	0.905679	1.34993	1.49025	2.3911	1.29182	3.1003	1.02705	1.93879	0.886928	1.7078	1.98213	1.75518	1.2029	0.999952	3.37677	1.40612	2.11011	0.541005	1.27821	1.30177	1.0622	1.27915	0.8487	0.887233	2.74189	0.987699	1.29805	3.05347	1.42584	3.41175
Cell_0072	FOXO_TR	Insulin 10000 ng/ml	2.38491	2.88489	4.07301	2.98036	4.00569	3.23052	3.58466	3.03807	3.03372	2.64222	2.81113	3.67227	0.832386	2.99391	2.03306	3.47117	2.86239	3.24249	2.64088	2.50838	3.38611	2.85146	3.98447	3.169	2.58937	4.02817	1.97282	4.68798	3.88988	1.39087	1.9052	3.47123	5.59508	3.66465	3.4125	3.09524	3.23123	2.14579	2.68806	2.82233	3.14026	4.39241	3.084	3.66038	2.97296	3.89784	3.29798
Cell_0072	AMPKARt2	Insulin 10000 ng/ml	0.266333	0.58106	0.52647	0.597706	0.68875	0.40469	0.514035	0.591777	0.424745	0.602211	0.472568	0.519959	0.322371	0.475225	0.699401	0.456473	0.421983	0.368125	0.453938	0.601759	0.469128	0.412454	0.517846	0.608142	0.540154	0.458619	0.351505	0.555343	0.413671	0.608771	0.521383	0.636641	0.538845	0.375735	0.673441	0.508822	0.544707	0.359038	0.484614	0.615252	0.526669	0.453545	0.439812	0.665338	0.595774	0.622911	0.323488
Cell_0073	TFEB_TR	Insulin 10000 ng/ml	1.45955	3.07951	0.52217	1.51094	0.739668	1.3262	1.82138	0.692412	1.59654	1.62928	0.939285	3.16423	1.32308	1.65552	0.538989	1.99002	2.74116	0.900604	1.31508	1.52478	2.303	1.26769	2.92878	1.05924	3.31745	0.849885	1.78681	1.98511	1.73387	1.28885	1.51002	3.18283	1.61516	1.88171	0.489672	1.21171	1.28461	0.97751	1.35024	0.94705	0.790402	2.62024	0.995353	1.16249	3.05151	1.4219	4.41548
Cell_0073	FOXO_TR	Insulin 10000 ng/ml	2.37019	2.97457	3.35506	2.94573	3.96246	3.37318	3.73921	2.91815	3.02869	2.95092	2.86715	3.6737	0.810119	2.772	2.03533	3.16043	2.79175	2.95745	2.55586	2.46966	3.29265	2.88695	3.88259	3.08922	2.34024	4.0359	2.00563	4.96668	3.79592	1.62351	1.89207	3.39385	5.6803	3.64018	3.32351	3.09588	3.03369	2.13246	2.7185	2.60286	3.06435	4.30996	3.16168	3.41562	2.93251	3.72889	3.5601
Cell_0073	AMPKARt2	Insulin 10000 ng/ml	0.297444	0.574507	0.550322	0.598841	0.676352	0.407801	0.483793	0.576577	0.460612	0.546982	0.484062	0.508113	0.318634	0.485563	0.700136	0.45199	0.410379	0.344335	0.469618	0.604043	0.48744	0.425128	0.502704	0.582299	0.437029	0.472144	0.362983	0.547582	0.41752	0.566346	0.504453	0.62699	0.51149	0.449879	0.653262	0.478359	0.490891	0.382221	0.504008	0.597147	0.538611	0.436629	0.412595	0.671075	0.608343	0.585998	0.326555
Cell_0074	TFEB_TR	Insulin 10000 ng/ml	1.85141	1.00513	0.516111	1.57161	0.736014	1.26843	1.96634	0.794006	1.26008	1.86022	0.88159	2.74874	1.25347	1.59956	0.531089	2.12869	1.89218	0.928984	1.24672	1.54447	2.78477	1.41882	3.27065	1.07762	1.82479	0.863059	2.4667	2.14741	1.76809	1.15138	1.06089	4.80316	1.75133	1.73095	0.550083	1.35045	1.37287	0.892824	1.07971	1.20257	0.741589	2.34537	0.910668	1.03181	2.63223	1.24815	6.23799
Cell_0074	FOXO_TR	Insulin 10000 ng/ml	2.3884	1.99303	3.44083	3.03554	4.01498	3.31501	3.84243	2.93525	2.88059	3.0863	2.87111	3.78574	0.851949	2.74743	2.12405	3.58102	2.96012	3.16849	2.29218	2.41426	3.2663	2.90555	3.71372	2.94883	2.15726	3.83701	2.09447	4.85018	4.16844	1.66749	1.8184	3.9229	6.13976	3.68446	3.44521	3.11297	3.003	2.11913	2.80905	2.75895	2.93103	4.06408	3.20207	3.57753	2.97844	3.95611	3.32557
Cell_0074	AMPKARt2	Insulin 10000 ng/ml	0.251041	0.481349	0.534779	0.595145	0.668069	0.402196	0.448205	0.584754	0.495704	0.537629	0.462944	0.51687	0.308271	0.484302	0.706265	0.449922	0.397863	0.341775	0.458204	0.609947	0.47549	0.439056	0.494514	0.599059	0.42947	0.459173	0.351959	0.519343	0.394734	0.539903	0.491206	0.625046	0.504698	0.495014	0.670818	0.467954	0.508642	0.405403	0.516097	0.599145	0.566425	0.454368	0.411856	0.672764	0.615372	0.608965	0.331784
Cell_0075	TFEB_TR	Insulin 10000 ng/ml	1.60064	0.901754	0.532425	1.8164	0.736708	1.24855	1.99255	0.756694	1.72874	2.03257	0.96299	2.12464	1.28848	1.64946	0.670691	1.9623	1.61998	0.896945	1.2485	1.47275	2.3081	2.14006	3.20462	1.05608	2.03016	0.860488	2.01825	3.15136	1.71778	1.30242	1.20506	4.95261	1.78191	1.54849	0.488793	1.21516	1.56886	1.23902	1.27561	0.928822	0.738237	2.40127	0.977669	0.651744	2.95212	1.13574	3.57145
Cell_0075	FOXO_TR	Insulin 10000 ng/ml	2.147	2.14018	3.50278	2.9301	4.07015	3.25347	3.65422	2.84064	2.92845	3.58053	3.05803	3.6215	0.805078	2.80302	3.69076	3.07158	2.86034	3.00831	2.24124	2.58425	3.15888	2.95653	3.89002	2.89413	2.45024	3.89743	2.0453	4.60628	4.23108	1.78573	1.82047	4.01346	5.92889	3.56698	3.42056	2.93513	3.02482	2.51642	2.99737	2.72602	3.06087	4.10078	3.24956	3.23843	2.9233	4.02467	3.09719
Cell_0075	AMPKARt2	Insulin 10000 ng/ml	0.293193	0.492211	0.533632	0.593366	0.666959	0.380607	0.446876	0.597407	0.502508	0.538186	0.462605	0.513532	0.320902	0.493174	0.639166	0.451633	0.352349	0.317399	0.468597	0.615119	0.460412	0.455457	0.497386	0.607573	0.515128	0.417914	0.346637	0.535482	0.407072	0.504903	0.494615	0.636185	0.516055	0.497017	0.67226	0.429611	0.493561	0.366242	0.530351	0.586943	0.570317	0.472528	0.433245	0.549029	0.62327	0.620577	0.356277
Cell_0076	TFEB_TR	Insulin 10000 ng/ml	1.7637	0.714643	0.550992	1.42931	0.734445	1.2501	0.985733	0.797093	1.23809	2.17374	0.971951	2.66378	1.30137	1.67031	0.747888	2.13737	1.33379	0.927887	1.23808	1.26836	2.47324	1.69414	3.51559	1.11231	1.06326	0.895456	2.29525	2.28596	1.69723	1.27144	0.911647	5.01292	1.58115	1.46617	0.52182	1.24152	1.29899	1.37037	0.86043	1.6769	0.737109	2.62101	1.11383	0.682003	2.7834	1.24975	4.79503
Cell_0076	FOXO_TR	Insulin 10000 ng/ml	2.17471	2.02768	3.07139	2.77659	3.95904	3.3455	0.861494	3.07964	2.96483	3.62777	2.94159	3.52277	0.810869	2.85345	3.58584	3.41516	2.69405	2.75702	2.1325	2.64032	3.26927	2.97049	3.76001	2.61832	2.4707	3.84836	2.3525	5.23641	3.87482	1.48679	1.79429	4.05034	6.1377	3.55645	3.39084	3.00191	3.09155	2.57173	2.56271	2.76675	3.1099	4.26723	3.34796	3.16013	3.00123	4.05934	3.23877
Cell_0076	AMPKARt2	Insulin 10000 ng/ml	0.297298	0.485739	0.525153	0.585199	0.666484	0.410398	0.416277	0.602792	0.53069	0.522893	0.445913	0.493634	0.312597	0.490413	0.632962	0.435136	0.332455	0.328474	0.454078	0.618884	0.459296	0.512509	0.498517	0.603705	0.482302	0.428722	0.353336	0.534684	0.398343	0.487472	0.475898	0.638836	0.508256	0.540049	0.677178	0.418867	0.497892	0.36399	0.516163	0.576701	0.555904	0.435978	0.471713	0.62751	0.605976	0.632609	0.403209
Cell_0077	TFEB_TR	Insulin 10000 ng/ml	1.57841	0.870811	0.577567	1.58413	0.730872	1.27431	0.948011	0.680652	1.49441	2.28836	1.05876	3.70892	1.30901	1.71036	0.796727	2.17531	3.12071	0.951617	1.20292	1.46883	2.78944	1.48754	3.00025	1.00487	2.35652	0.953853	2.13859	2.37763	1.61049	1.37415	0.90522	5.8429	1.82914	1.42342	0.430281	1.3513	1.39355	1.38756	1.36874	1.22533	0.76404	2.65954	1.0534	0.703306	2.1915	1.12437	4.58946
Cell_0077	FOXO_TR	Insulin 10000 ng/ml	2.43578	2.02829	3.21341	2.79816	4.01697	3.3768	0.867324	3.16591	2.97359	3.69304	3.07261	3.76814	0.890654	2.88829	3.92561	3.52411	2.71794	2.69907	2.19002	2.7921	3.5176	3.10358	3.89282	2.43998	1.99206	4.02815	2.37841	4.98021	3.70073	1.42003	1.67971	4.09148	6.42479	3.33006	2.68564	2.97128	3.07835	2.15129	2.82067	2.56315	3.04293	4.23506	3.43928	3.04247	2.90395	3.97756	3.55959
Cell_0077	AMPKARt2	Insulin 10000 ng/ml	0.287535	0.488232	0.492322	0.60381	0.642408	0.399104	0.41884	0.622661	0.518383	0.498977	0.463356	0.499487	0.310762	0.494477	0.608602	0.438588	0.330552	0.319202	0.45411	0.610475	0.471802	0.525087	0.490748	0.633302	0.511806	0.419478	0.357814	0.52067	0.425175	0.471579	0.491207	0.62129	0.462669	0.515944	0.65888	0.426784	0.545709	0.379579	0.489935	0.569136	0.550736	0.459801	0.487782	0.616132	0.588223	0.607632	0.439451
Cell_0078	TFEB_TR	Insulin 10000 ng/ml	1.95506	0.909741	0.570039	1.59968	0.788074	1.23364	0.956223	0.730027	1.82682	2.25003	1.06832	1.37696	1.46594	1.69395	0.82644	1.95418	1.16554	0.979587	1.17754	1.57966	2.91092	1.72307	2.62185	0.991589	1.14949	1.02157	2.23463	3.77743	1.59461	1.48047	0.993384	6.17553	1.9434	1.39345	0.501878	1.37204	1.4144	1.26564	0.880051	2.07756	0.794582	2.39882	0.953471	0.7915	2.72051	1.27114	2.82038
Cell_0078	FOXO_TR	Insulin 10000 ng/ml	2.30191	1.97122	2.9564	2.81378	4.0208	3.55767	0.92077	3.02369	2.9829	3.75822	3.10356	2.49371	0.903498	2.8614	4.18735	2.93673	2.71442	2.73749	2.0089	2.80748	3.2653	3.10379	3.90265	2.56066	1.89856	4.0883	2.52149	4.592	3.61352	1.71043	1.80891	4.14836	5.8712	3.37905	3.8328	3.04324	3.14021	2.36168	2.69386	2.62513	3.01591	4.16984	3.45794	3.34543	2.97183	4.05963	3.48569
Cell_0078	AMPKARt2	Insulin 10000 ng/ml	0.250952	0.511488	0.516298	0.580105	0.632124	0.424156	0.453715	0.605343	0.502272	0.485162	0.467968	0.597071	0.309994	0.476413	0.602902	0.435934	0.315074	0.318185	0.465823	0.581356	0.455293	0.514127	0.480271	0.622593	0.525402	0.410965	0.359587	0.640843	0.412702	0.574131	0.450703	0.617984	0.439625	0.514586	0.689881	0.406311	0.564372	0.440815	0.468699	0.583683	0.529958	0.446647	0.506328	0.62849	0.618328	0.611253	0.450058
Cell_0079	TFEB_TR	Insulin 10000 ng/ml	2.32168	0.882042	0.568441	1.54952	0.806308	1.25167	0.911995	0.685984	1.40744	2.17546	1.13934	1.30435	1.2897	1.66927	0.876681	1.99899	1.71027	1.03995	1.15002	1.6547	2.76645	1.57735	2.95068	1.05946	1.29452	0.992713	2.75618	1.99969	1.46727	1.26681	1.162	6.64036	2.15594	1.54045	0.565796	1.3963	1.42971	1.30816	0.916556	1.52164	0.86824	2.78776	0.824209	0.773203	3.51767	1.42995	4.00437
Cell_0079	FOXO_TR	Insulin 10000 ng/ml	2.35334	1.91238	2.82671	2.8274	3.99431	3.53447	0.932811	3.23069	2.82549	3.77782	3.1201	2.31418	0.828827	2.7012	4.14765	3.14443	2.57401	2.84475	2.04374	2.91226	3.56419	3.05983	3.86562	2.73975	2.68384	4.22195	2.69749	4.61943	3.34657	1.9076	1.99483	4.05162	5.60755	3.39384	4.0571	2.77337	3.11757	2.20658	2.51005	2.73592	3.19366	4.35491	3.31475	3.0013	2.81688	3.89366	3.42059
Cell_0079	AMPKARt2	Insulin 10000 ng/ml	0.262656	0.516344	0.514856	0.621135	0.630006	0.455226	0.420138	0.618438	0.470256	0.473549	0.458379	0.577533	0.331907	0.492233	0.57169	0.438345	0.323264	0.317113	0.464347	0.569395	0.45767	0.52537	0.475937	0.628264	0.410785	0.409062	0.365584	0.545763	0.444252	0.617678	0.455297	0.622582	0.430063	0.483371	0.676336	0.410136	0.59729	0.471565	0.46011	0.598535	0.517416	0.418336	0.515228	0.549085	0.639489	0.592033	0.448996
Cell_0080	TFEB_TR	Insulin 10000 ng/ml	2.38972	0.941643	0.620241	1.70756	0.812527	1.13353	0.935068	1.00883	1.72805	2.00134	1.18337	1.29451	1.3546	1.68602	0.934063	2.00695	0.593532	1.00649	1.19296	1.75261	3.13048	1.61314	2.29811	0.991045	2.14188	1.00601	2.63553	2.12297	1.55738	1.20728	1.25076	5.71347	2.13478	1.5515	0.598384	1.38931	1.42691	1.2276	1.34705	1.21816	0.919363	2.8901	0.937585	0.958093	2.68804	1.60103	2.78884
Cell_0080	FOXO_TR	Insulin 10000 ng/ml	2.46644	1.94541	2.87334	2.83256	3.95233	3.65065	0.997127	3.36895	2.74698	3.68207	3.1098	2.27195	0.857744	2.70303	3.75201	3.14668	1.81779	2.52305	2.07397	2.88625	3.89588	2.98321	3.73082	2.57302	3.08287	4.13968	2.61613	4.53113	3.63489	1.83049	1.9563	3.89146	5.64533	3.45862	4.19292	2.84588	3.09728	2.5686	2.71675	2.77569	3.2317	4.52077	3.22129	3.4612	2.67879	3.69815	3.30739
Cell_0080	AMPKARt2	Insulin 10000 ng/ml	0.247163	0.506044	0.521759	0.596037	0.615316	0.454787	0.431367	0.59751	0.455474	0.471825	0.451289	0.594229	0.336879	0.479181	0.575727	0.441588	0.499668	0.333302	0.456504	0.540788	0.452084	0.501032	0.496774	0.640002	0.361014	0.417452	0.359379	0.592261	0.415326	0.620381	0.535273	0.645299	0.421271	0.45861	0.68897	0.414369	0.573683	0.469492	0.468355	0.622315	0.521978	0.409406	0.486924	0.579612	0.603305	0.578128	0.439267
Cell_0081	TFEB_TR	Insulin 10000 ng/ml	2.66864	1.09038	0.736967	2.2621	0.83643	1.07513	0.859928	1.04824	1.57375	1.95697	1.13675	1.21702	1.36632	1.62177	1.02504	1.93353	0.589403	1.02951	1.19412	1.72135	2.63511	1.35398	3.19095	1.10227	2.09596	1.06245	2.51487	2.38792	1.56121	1.66218	1.22601	5.0066	2.27524	1.5428	0.62908	1.41164	1.44808	1.19622	1.3655	1.02126	0.958217	2.84148	0.987734	1.17328	3.33156	1.49955	2.96971
Cell_0081	FOXO_TR	Insulin 10000 ng/ml	2.87356	2.00961	2.82347	2.84514	3.91069	3.52878	0.957804	3.78121	2.86323	3.49694	3.0994	2.14599	0.896935	2.52515	3.89542	3.0716	1.65666	2.29635	2.10937	2.69002	3.57016	3.06189	3.82107	2.90288	2.92526	4.25767	2.53477	4.66623	3.72488	3.06316	1.94275	3.75102	5.39764	3.30026	3.85608	2.81865	3.20926	2.63488	2.74282	2.8668	3.18009	4.19969	3.15811	3.51984	2.75828	3.76364	3.70941
Cell_0081	AMPKARt2	Insulin 10000 ng/ml	0.25699	0.506813	0.517462	0.603762	0.600975	0.455481	0.423418	0.606669	0.435759	0.470678	0.454656	0.5977	0.344422	0.495703	0.558032	0.425345	0.492908	0.337581	0.458109	0.50339	0.466239	0.511289	0.52021	0.630396	0.313746	0.400193	0.353175	0.606537	0.430816	0.500472	0.552111	0.640909	0.396321	0.441103	0.656833	0.442924	0.573579	0.410404	0.476982	0.653249	0.499216	0.421827	0.480685	0.583259	0.624731	0.595748	0.407254
Cell_0082	TFEB_TR	Insulin 10000 ng/ml	2.40227	1.12867	0.625874	1.51238	0.892411	1.03781	0.948379	0.912792	1.30598	2.30817	1.04953	1.18929	1.22651	1.57473	1.12608	1.86339	0.580004	0.994272	1.29937	1.78863	2.88012	1.39939	3.05935	0.998719	1.40668	1.1106	2.13613	2.5871	1.60606	1.41993	1.03728	5.84186	2.19649	1.55122	0.66385	1.4725	1.45022	1.13423	1.34212	0.824358	1.04456	2.52584	0.983511	1.1217	3.23772	1.60262	3.41293
Cell_0082	FOXO_TR	Insulin 10000 ng/ml	2.78487	1.99482	2.97394	2.80397	3.99132	3.55327	1.00614	3.36976	2.94996	3.49268	3.10448	2.10766	0.967984	2.35306	3.88339	2.95005	1.74101	2.10435	2.45377	2.69678	3.69646	1.52054	3.83324	2.90258	2.89244	4.28763	2.50941	4.89865	3.87459	3.03266	2.07098	3.49475	5.23859	3.27518	3.85919	2.63593	2.96548	2.50586	2.7824	2.95791	3.28289	3.99498	3.15203	3.41309	2.92966	3.64505	3.60225
Cell_0082	AMPKARt2	Insulin 10000 ng/ml	0.271071	0.516031	0.54733	0.580821	0.612512	0.451936	0.418882	0.603545	0.423963	0.445482	0.467291	0.608892	0.358192	0.489173	0.554268	0.454472	0.455378	0.340122	0.450672	0.479856	0.460849	0.637244	0.52604	0.635457	0.30132	0.374962	0.367134	0.617939	0.422036	0.476929	0.57999	0.647218	0.399668	0.415667	0.675679	0.504609	0.581282	0.388714	0.472656	0.684183	0.482741	0.420605	0.484324	0.562171	0.623793	0.578176	0.386777
Cell_0083	TFEB_TR	Insulin 10000 ng/ml	1.89649	0.996958	0.61038	1.49538	0.916869	1.10495	0.933375	1.10349	1.29815	2.46717	1.11788	1.22845	1.28787	1.49573	1.29114	1.95886	0.62432	1.03514	1.28735	1.97192	3.02465	0.613443	3.13997	0.880801	1.38874	1.05398	3.08814	2.24369	1.65557	1.45515	1.25483	5.1877	2.3422	1.66503	0.83411	1.35301	1.59509	1.14593	1.21865	1.23168	1.04133	2.6304	1.08462	1.20325	3.95633	1.71541	2.71597
Cell_0083	FOXO_TR	Insulin 10000 ng/ml	2.60307	2.10446	2.66288	2.88541	4.07519	3.5087	0.967474	3.44415	2.91569	3.57024	2.92985	2.09213	1.0233	2.24334	3.90826	3.13007	1.99538	2.38591	2.27033	3.0898	3.46157	1.34456	3.60712	2.51629	3.01685	4.29049	2.63571	4.79004	4.16922	2.41657	2.22713	3.48277	5.15634	3.38714	4.20165	2.61992	2.86987	2.35151	2.68218	3.05555	3.17694	3.92714	3.16599	3.12852	2.89453	4.09402	3.34323
Cell_0083	AMPKARt2	Insulin 10000 ng/ml	0.228196	0.528778	0.5463	0.584787	0.591715	0.431695	0.422413	0.574981	0.417181	0.42894	0.467157	0.596533	0.38218	0.490584	0.551914	0.445741	0.469084	0.332451	0.452701	0.464011	0.453498	0.643337	0.539963	0.638369	0.297253	0.400141	0.365421	0.64531	0.417733	0.432527	0.583201	0.64357	0.400971	0.379275	0.622158	0.529811	0.587409	0.374924	0.475648	0.685539	0.452028	0.388853	0.49056	0.558551	0.621614	0.621515	0.360649
Cell_0084	TFEB_TR	Insulin 10000 ng/ml	1.9585	1.07115	0.897648	1.43003	0.947053	1.15946	0.966626	0.934542	1.66843	2.2456	1.08671	1.18674	1.0895	1.59545	1.32319	2.0389	0.597942	0.977797	1.29551	2.00884	2.88851	0.963936	2.52578	0.883005	1.20949	1.02421	0.787261	2.08943	1.70947	1.46585	1.14268	5.34595	2.51646	1.65745	0.937736	1.49571	1.32443	1.34495	1.18982	0.814964	1.16087	2.75506	1.09585	1.24551	2.87787	1.23159	3.91764
Cell_0084	FOXO_TR	Insulin 10000 ng/ml	2.65921	2.04285	1.75876	2.79669	3.97228	3.50312	0.982371	3.27935	2.74125	3.51479	2.89464	1.87638	0.940594	2.44894	3.71201	3.3301	1.93801	2.25587	2.35919	3.03427	3.56217	1.38242	3.60641	2.45985	2.69314	4.17937	3.38148	4.66758	4.10852	2.55474	2.22118	3.77953	5.72005	3.49688	4.39747	2.45491	2.93825	2.41777	2.55302	3.23764	3.39572	4.38882	3.14513	3.12437	2.95286	3.88638	3.33785
Cell_0084	AMPKARt2	Insulin 10000 ng/ml	0.211257	0.511278	0.618172	0.572605	0.584914	0.421444	0.420885	0.605664	0.388217	0.464819	0.475672	0.604136	0.368372	0.499477	0.557944	0.42804	0.461931	0.32271	0.46886	0.465716	0.443631	0.624229	0.535536	0.651717	0.300218	0.419065	0.609123	0.631038	0.406268	0.399661	0.600834	0.642369	0.411821	0.38803	0.610142	0.513025	0.567512	0.360008	0.4711	0.700069	0.453364	0.388906	0.469383	0.587725	0.605318	0.597785	0.336663
Cell_0085	TFEB_TR	Insulin 10000 ng/ml	1.81408	1.16979	0.590693	1.68776	0.996839	1.23686	0.967926	1.29555	2.44438	2.4632	0.945903	1.1512	1.10289	1.61484	1.34527	1.81578	0.620874	0.964515	1.26945	2.11668	2.79791	0.970705	2.34321	0.829207	1.57983	1.07586	0.91071	2.514	1.76546	1.74931	1.52802	7.20859	3.13586	1.90021	0.920747	1.65995	1.3566	1.23026	1.10397	0.999453	1.19647	2.58171	1.02322	1.26993	3.32456	1.31961	5.39265
Cell_0085	FOXO_TR	Insulin 10000 ng/ml	2.60005	2.17367	1.84466	2.85089	4.03773	3.32784	0.982835	3.37216	2.72181	3.5379	2.64716	1.8005	0.930857	2.88146	4.00901	2.86144	2.04167	2.27213	2.30674	3.28815	3.60193	1.38912	3.55013	2.35817	2.5821	4.18777	3.20936	4.92544	4.32392	2.86683	2.3478	3.66417	5.42629	3.63442	4.50769	2.68408	2.88373	2.06675	2.60625	3.85835	3.36101	4.12889	3.16152	3.28387	3.29979	4.00699	3.41809
Cell_0085	AMPKARt2	Insulin 10000 ng/ml	0.248462	0.524604	0.548785	0.588986	0.587786	0.424511	0.42522	0.611184	0.433023	0.457927	0.465173	0.590119	0.345272	0.505819	0.618998	0.449167	0.464231	0.346874	0.456909	0.459726	0.469334	0.635508	0.548449	0.645898	0.302997	0.415582	0.561971	0.631473	0.401306	0.418283	0.584177	0.618615	0.383241	0.364255	0.600534	0.527393	0.589545	0.370477	0.471261	0.596505	0.46233	0.393544	0.457094	0.602105	0.605258	0.59657	0.350106
Cell_0086	TFEB_TR	Insulin 10000 ng/ml	2.8981	1.46934	0.553446	1.41028	1.03287	1.28792	0.962808	1.37108	1.66823	2.48791	0.969632	1.16124	1.15272	1.71786	1.26348	1.68555	0.624787	0.941911	1.2814	2.24907	2.69696	0.861711	2.18668	0.880154	2.27997	1.03216	0.975972	2.16432	1.73924	1.43924	1.28367	0.592044	2.94077	1.93909	1.06192	1.69861	1.50861	1.17297	1.36434	1.52208	1.23207	3.07843	1.05571	1.28168	2.40963	1.43052	3.56384
Cell_0086	FOXO_TR	Insulin 10000 ng/ml	2.4124	2.15751	1.81261	2.80069	3.98817	3.3221	0.992842	3.43531	2.73448	3.6917	2.82137	1.86207	0.945525	2.80904	3.91597	2.60336	2.11488	2.23398	2.36135	3.64119	3.64037	1.27068	3.56871	2.33006	2.91322	3.82527	3.05592	4.99855	3.83544	2.72989	2.16886	1.92583	5.49435	3.68867	4.8186	2.75159	2.75975	1.94526	2.52102	4.09196	3.32631	4.05905	3.25422	3.24418	3.34451	3.75034	3.45899
Cell_0086	AMPKARt2	Insulin 10000 ng/ml	0.223573	0.509867	0.533006	0.565901	0.550135	0.405308	0.424211	0.631252	0.440052	0.444157	0.484752	0.560581	0.353548	0.50627	0.628013	0.438967	0.458057	0.386763	0.466634	0.440401	0.458513	0.635747	0.532395	0.646883	0.301554	0.421675	0.542408	0.603514	0.39372	0.400755	0.55714	0.526582	0.411089	0.368335	0.566037	0.519376	0.589035	0.344484	0.503437	0.511571	0.471295	0.367457	0.480902	0.579615	0.630107	0.586969	0.33598
Cell_0087	TFEB_TR	Insulin 10000 ng/ml	2.03303	1.51333	0.543923	1.45294	1.05988	1.39421	0.945429	1.23429	2.0077	2.60074	1.02324	1.35679	1.26057	1.68732	1.18228	1.73908	0.638221	0.917561	1.3179	2.27645	2.39966	0.547408	2.64155	0.774322	2.66138	1.02134	1.09342	2.4257	1.61408	2.61671	1.16714	0.502591	3.09866	1.99576	0.949789	1.71837	1.56384	1.12683	1.39315	1.78216	1.24616	2.94922	0.977649	1.3758	2.84799	1.55482	6.11081
Cell_0087	FOXO_TR	Insulin 10000 ng/ml	2.30388	2.20239	2.08587	2.74779	3.81162	3.43997	0.978904	3.44514	2.75517	3.71102	2.85042	1.94131	0.961679	2.75091	4.01634	2.74098	2.03152	2.34598	2.5425	3.54295	3.3394	1.37445	3.45893	2.21894	3.0102	4.05372	2.81157	4.84255	3.24226	3.31532	2.01391	1.8266	5.74667	3.47049	4.50445	2.79603	2.89101	1.91189	2.5612	4.44482	3.31923	4.35532	3.09809	3.31104	3.35207	3.99457	3.52779
Cell_0087	AMPKARt2	Insulin 10000 ng/ml	0.241758	0.542997	0.520251	0.566216	0.545191	0.386648	0.397822	0.617777	0.449218	0.446696	0.48084	0.584048	0.366037	0.516621	0.630294	0.44272	0.477924	0.37789	0.449266	0.431303	0.452608	0.639689	0.530298	0.626246	0.269823	0.416313	0.51697	0.595418	0.40494	0.370227	0.54381	0.552829	0.441498	0.376895	0.542309	0.521717	0.582472	0.333583	0.510185	0.458466	0.460732	0.360607	0.491753	0.589521	0.524368	0.581922	0.353809
Cell_0088	TFEB_TR	Insulin 10000 ng/ml	1.46567	1.17572	0.555546	1.75221	1.10095	1.43937	0.946979	1.23355	1.40298	2.56185	1.11133	1.40308	1.21434	1.57241	1.09396	1.77827	0.603144	0.945585	1.35672	2.31335	2.52271	1.18617	2.24176	0.898339	1.5707	1.06439	1.15345	2.0635	1.58928	1.7484	1.23417	0.643772	3.43225	1.92831	0.955156	1.4968	1.46329	1.13978	1.21137	1.55399	1.29638	2.59612	1.08395	1.36788	2.98083	1.35636	3.29825
Cell_0088	FOXO_TR	Insulin 10000 ng/ml	2.18694	2.10239	2.08141	2.80168	3.99286	3.37966	0.917471	3.05958	2.70867	3.54713	2.9061	1.9231	1.02468	2.50622	4.01474	2.82376	1.96063	2.32241	2.63581	3.50307	3.46995	1.28847	3.48564	2.50361	3.25928	4.36803	2.75397	4.82806	3.26965	3.34141	1.93143	1.77578	5.53368	3.33526	4.1352	2.70655	2.83043	2.08577	2.6466	4.24239	3.34064	3.9843	3.16056	3.58407	3.33941	4.07833	3.45028
Cell_0088	AMPKARt2	Insulin 10000 ng/ml	0.247709	0.532988	0.526513	0.608978	0.559766	0.383141	0.410433	0.609943	0.472501	0.442866	0.476466	0.599327	0.36277	0.51499	0.627447	0.437261	0.462545	0.380373	0.462701	0.443409	0.449931	0.657238	0.518995	0.626677	0.318273	0.417407	0.50424	0.568697	0.409943	0.356884	0.497634	0.557359	0.440355	0.362446	0.505751	0.486325	0.681714	0.322568	0.55125	0.424467	0.474173	0.333227	0.482089	0.600682	0.475845	0.587629	0.352818
Cell_0089	TFEB_TR	Insulin 10000 ng/ml	1.60411	1.21847	0.564382	1.60377	1.08317	1.43089	0.994707	1.39956	1.78334	2.55432	1.09961	1.3642	1.20742	1.60987	1.03521	1.7188	0.632136	0.924227	1.40913	2.32169	2.5476	0.832516	2.15748	0.8357	2.61125	1.05983	1.26261	2.11536	1.71619	1.64974	1.20759	0.992378	2.97284	1.83317	1.04517	1.6648	1.10638	1.06976	1.24597	2.09408	1.45241	3.06961	1.14805	1.2821	2.99084	1.47045	4.87063
Cell_0089	FOXO_TR	Insulin 10000 ng/ml	2.40032	2.12183	2.19226	2.85047	4.09108	3.32225	0.901361	3.02073	2.79763	3.69542	2.96488	1.95351	0.914955	2.71398	4.31836	2.63289	2.10702	2.33029	2.84283	3.53344	3.47043	1.21684	3.35225	2.73538	3.54007	4.04324	2.70787	5.0784	3.50197	3.17984	1.88235	1.67521	5.21452	3.12889	4.30425	2.749	2.89018	1.98207	2.6526	4.23779	3.40083	3.85393	2.91667	3.32909	3.48681	4.10749	3.30609
Cell_0089	AMPKARt2	Insulin 10000 ng/ml	0.246213	0.542533	0.5217	0.599287	0.570238	0.400663	0.389911	0.60549	0.510432	0.429628	0.476578	0.600612	0.37313	0.502828	0.621321	0.431505	0.472615	0.374199	0.467395	0.433025	0.437038	0.663076	0.513554	0.645957	0.305015	0.415619	0.556173	0.567052	0.395912	0.350492	0.51665	0.571953	0.399126	0.382293	0.505043	0.493665	0.6822	0.280735	0.563087	0.400939	0.471549	0.360564	0.472393	0.589217	0.483923	0.571724	0.344393
Cell_0090	TFEB_TR	Insulin 10000 ng/ml	1.68764	1.19282	0.57489	1.87634	1.02944	1.43745	0.971388	1.20695	1.84915	2.6999	1.07187	1.34699	1.08709	1.66741	0.949914	1.66817	0.597439	0.904615	1.43546	2.33854	2.49876	0.798848	2.36763	0.869017	3.03213	0.998198	1.05982	2.55804	1.71009	2.02262	1.02483	0.809192	2.60301	1.82684	1.20456	1.54166	1.83291	1.45193	1.87801	1.92151	1.29435	0.438922	1.07593	1.40554	2.85393	1.59768	3.10349
Cell_0090	FOXO_TR	Insulin 10000 ng/ml	2.66333	2.25758	2.37464	2.90307	3.931	3.379	0.840478	2.68458	2.79963	3.65941	2.97561	2.1068	0.88191	2.72934	4.05023	2.55326	2.06069	2.38944	2.99991	3.78548	3.17382	1.15732	3.52472	2.82873	3.70621	4.02349	2.84608	5.16408	3.4467	2.99456	1.90339	1.54897	4.84004	2.97937	4.18589	3.02504	2.87612	2.38371	2.65529	4.3674	3.26806	1.59504	2.93337	3.50545	3.51047	4.1858	2.90846
Cell_0090	AMPKARt2	Insulin 10000 ng/ml	0.259541	0.525803	0.531011	0.600085	0.596883	0.403437	0.401662	0.602052	0.5086	0.426625	0.457352	0.595478	0.367345	0.499351	0.595036	0.414555	0.474842	0.364959	0.471	0.463845	0.439405	0.663811	0.498675	0.662278	0.2958	0.415643	0.601706	0.551766	0.399975	0.338107	0.496848	0.560582	0.415046	0.382139	0.47837	0.460809	0.658578	0.345733	0.555496	0.379377	0.496292	0.613144	0.511991	0.603626	0.459229	0.561381	0.420935
Cell_0091	TFEB_TR	Insulin 10000 ng/ml	1.73586	1.33477	0.615237	1.7045	0.987717	1.4674	1.00504	1.2127	1.76795	2.7935	1.1244	1.35571	1.18161	1.76133	0.946246	1.77107	0.584806	0.93975	1.3417	2.43228	2.22515	2.39655	2.70119	0.971813	1.88455	0.958887	0.980578	2.93702	1.79144	2.06321	1.19347	0.774388	2.66312	1.72382	1.42089	1.50279	1.59304	1.47871	1.3932	2.0415	1.23977	0.416113	1.08471	1.24157	2.41039	1.52601	3.1778
Cell_0091	FOXO_TR	Insulin 10000 ng/ml	2.71088	2.52379	2.58249	3.01761	3.49566	3.29628	0.8569	3.00847	2.76779	3.72927	3.04041	2.14975	0.920913	2.90853	4.53274	2.71579	2.05887	2.36559	2.58034	3.96448	2.99656	1.11894	3.50194	3.51209	3.31406	3.86128	2.92324	5.04115	3.57691	2.85971	1.92154	1.47627	4.97731	3.13041	4.56189	2.84795	2.633	2.43647	2.78462	4.45369	3.20858	1.54607	2.86546	3.14774	3.45533	4.08372	2.91395
Cell_0091	AMPKARt2	Insulin 10000 ng/ml	0.253392	0.523756	0.543019	0.608907	0.583687	0.391929	0.389598	0.610026	0.505774	0.452678	0.457446	0.617814	0.347342	0.504511	0.583522	0.445085	0.457969	0.363284	0.454458	0.493754	0.427728	0.65485	0.478154	0.661553	0.285507	0.445116	0.626682	0.543692	0.391388	0.320747	0.469935	0.580711	0.436146	0.394736	0.464045	0.445147	0.651088	0.331356	0.533435	0.362838	0.49358	0.57131	0.531353	0.629796	0.449906	0.574748	0.470421
Cell_0092	TFEB_TR	Insulin 10000 ng/ml	1.66407	1.67435	0.562954	1.47635	0.97883	1.45557	0.971401	0.909119	1.49453	2.62009	1.17996	1.38771	1.08059	1.82278	0.943893	1.83339	0.588529	0.906213	1.41437	2.2377	2.49735	1.39033	2.61457	1.04821	2.00845	0.933807	1.00345	2.11402	1.82482	1.40096	1.56308	0.792633	2.20157	1.78381	1.31081	1.60419	2.09258	1.39763	1.23508	3.87214	1.19144	0.42152	1.13047	1.1415	2.55545	1.69805	2.2164
Cell_0092	FOXO_TR	Insulin 10000 ng/ml	2.59215	2.60636	2.55144	2.99902	3.51962	3.31067	0.844406	2.88312	2.81354	3.62472	3.12103	2.08371	0.793035	2.87598	4.44639	2.70668	2.11835	2.35509	2.74349	3.89917	3.07787	1.07781	3.31038	3.82866	3.77162	3.50451	3.57377	4.88352	3.73422	2.66287	2.11939	1.57524	4.94528	3.15144	4.32315	2.86882	2.85845	2.24886	2.82248	4.52015	3.32569	1.51275	2.8542	3.13483	3.51738	4.25035	3.30113
Cell_0092	AMPKARt2	Insulin 10000 ng/ml	0.265024	0.505027	0.544864	0.597396	0.592663	0.376928	0.38743	0.62267	0.483272	0.423434	0.455956	0.600042	0.35328	0.506205	0.565713	0.441968	0.465219	0.341471	0.467727	0.515072	0.420536	0.662994	0.472941	0.656198	0.299596	0.438561	0.598731	0.55198	0.406646	0.331706	0.48004	0.57612	0.445367	0.412828	0.460336	0.403607	0.64945	0.348964	0.545546	0.366681	0.515265	0.57532	0.531232	0.657216	0.428785	0.57549	0.33136
Cell_0093	TFEB_TR	Insulin 10000 ng/ml	2.35298	1.33634	0.571569	1.58862	0.972053	1.45408	0.96333	0.974169	2.2878	2.47384	1.18889	1.32789	1.10843	1.96079	0.99117	1.98863	0.577054	0.923819	1.48515	2.08843	2.79017	0.764692	2.51935	0.946678	2.39554	0.894774	0.988845	2.75953	1.72833	1.46973	1.41977	0.854927	2.36222	1.67286	1.13438	2.27738	2.16194	1.29918	1.09025	1.62936	1.13104	0.396864	1.12269	1.11455	2.67934	1.57406	1.87598
Cell_0093	FOXO_TR	Insulin 10000 ng/ml	2.66467	2.58641	2.86029	2.95006	3.96646	3.31018	0.857224	3.17058	2.84438	3.46961	3.07794	2.01331	0.868243	3.13121	4.64975	2.94452	2.08656	2.3596	2.7944	3.61108	3.4308	1.07276	3.40509	3.34023	3.59079	3.46468	3.44213	4.71133	3.69752	2.41386	2.18291	1.4595	4.92966	3.18671	4.37098	2.85628	2.94762	2.10118	2.71185	4.68045	3.23218	1.62563	2.94518	2.93829	3.4678	3.80569	2.97993
Cell_0093	AMPKARt2	Insulin 10000 ng/ml	0.252276	0.52566	0.538013	0.594928	0.57762	0.386434	0.399373	0.630264	0.474799	0.427461	0.462027	0.5859	0.346329	0.490676	0.569913	0.435652	0.471585	0.349235	0.468	0.514665	0.439701	0.660238	0.470237	0.64572	0.26477	0.457612	0.621639	0.543741	0.410517	0.323967	0.490427	0.55387	0.421257	0.418715	0.444902	0.405355	0.651217	0.39964	0.495138	0.384983	0.512562	0.58062	0.52702	0.591401	0.446201	0.590265	0.379268
Cell_0094	TFEB_TR	Insulin 10000 ng/ml	1.6727	1.14625	0.622258	1.33179	0.964398	1.54677	0.981317	0.999605	2.40814	2.51504	1.18832	1.30453	1.05627	1.85116	1.02414	2.04474	0.589618	0.899337	1.5584	1.88506	2.45684	1.56037	2.77211	0.965363	2.27262	0.855305	0.988336	2.9267	1.7199	1.28016	1.39102	0.66118	2.43958	1.58196	1.21734	1.88929	1.65096	1.12697	1.27777	2.34941	1.10651	0.392305	0.997446	1.10493	2.88677	1.51036	2.13857
Cell_0094	FOXO_TR	Insulin 10000 ng/ml	2.61294	3.01417	2.7782	2.91031	3.73278	3.36313	0.850538	3.11158	2.79055	3.4557	3.15999	2.03997	0.864681	2.8647	4.69032	3.09894	2.61528	2.26144	3.01198	3.64807	3.23913	1.11242	3.2838	3.48338	3.74381	3.53606	3.22669	4.95922	3.9037	2.38643	2.32927	1.37195	4.96749	3.10554	3.78399	2.74547	2.80552	2.07736	2.64319	4.37892	3.27089	1.83319	2.97846	3.21196	2.99464	3.67748	2.85817
Cell_0094	AMPKARt2	Insulin 10000 ng/ml	0.242265	0.471876	0.562095	0.59365	0.586401	0.369808	0.379016	0.607693	0.427739	0.451107	0.438547	0.583637	0.329289	0.488381	0.535894	0.443712	0.464507	0.354966	0.46106	0.517849	0.405932	0.672459	0.461531	0.638923	0.298443	0.480571	0.623585	0.580318	0.415318	0.301303	0.549493	0.560292	0.456949	0.425029	0.460052	0.406138	0.654631	0.377301	0.484761	0.379124	0.519911	0.577285	0.52831	0.617472	0.434044	0.606993	0.352644
Cell_0095	TFEB_TR	Insulin 10000 ng/ml	1.84057	1.25747	0.608732	1.53408	0.948135	1.48491	0.968155	0.985438	2.12499	2.50266	1.25398	1.33193	1.18593	1.8108	1.06173	2.03218	0.625339	1.02555	1.53123	1.86879	2.54725	0.675885	3.00985	1.04616	2.39495	0.842934	0.917411	3.55313	1.71147	1.62319	2.77051	0.664864	2.2029	1.66516	1.06826	1.59552	1.5337	1.09976	0.978263	7.05228	1.03463	0.348152	1.04436	1.11361	2.47298	1.49925	2.22913
Cell_0095	FOXO_TR	Insulin 10000 ng/ml	2.61985	2.46598	2.87175	2.7676	3.80479	3.53228	0.834588	3.14848	2.8086	3.40677	3.2421	2.15471	0.877863	2.80711	4.67828	3.28225	2.52525	2.44304	2.78774	3.47342	3.58113	1.11767	3.30828	3.60455	3.81426	3.5592	3.29601	5.1782	4.10988	2.38461	2.09486	1.35643	5.18628	3.09091	3.52569	2.65104	2.79763	1.98789	2.71033	4.60354	3.23781	2.02646	3.05411	3.13599	3.12055	3.60138	2.78655
Cell_0095	AMPKARt2	Insulin 10000 ng/ml	0.238477	0.444594	0.581405	0.580024	0.536967	0.393096	0.388471	0.63902	0.41828	0.448817	0.42779	0.563287	0.332271	0.507541	0.538609	0.440678	0.479539	0.325478	0.46843	0.522233	0.423355	0.658887	0.475433	0.623142	0.297912	0.466182	0.623335	0.613964	0.42012	0.351288	0.553561	0.563246	0.534497	0.427452	0.452934	0.40883	0.683614	0.382952	0.479486	0.384675	0.507083	0.573164	0.524287	0.614867	0.45406	0.616679	0.36642
Cell_0096	TFEB_TR	Insulin 10000 ng/ml	1.96936	1.52871	0.564563	1.45548	0.963467	1.36099	1.0697	0.858408	1.89252	2.48685	1.35226	1.34723	1.26253	1.91407	1.10724	2.00275	0.644488	1.1582	1.3771	1.8569	2.78722	1.05411	2.30691	0.9551	2.32829	0.814107	0.91582	3.26579	1.52904	1.61292	3.0099	0.84262	2.00463	1.62988	1.11704	1.41259	1.48852	1.14197	1.16559	3.41968	0.990426	0.457324	1.10336	1.18517	3.25493	1.43231	2.13782
Cell_0096	FOXO_TR	Insulin 10000 ng/ml	2.71375	2.41399	2.83453	2.81029	3.94592	3.47874	2.43685	3.12518	2.61923	3.51217	3.13969	2.22743	0.97155	2.99125	4.93921	3.07544	2.35491	2.46822	2.31777	3.29089	3.65468	1.08246	3.41039	3.45678	3.48207	3.43758	3.35464	5.23771	3.82614	2.4762	2.1864	1.44255	4.75288	3.09155	3.60264	2.63996	2.77452	2.00469	2.88801	4.64415	3.141	2.20031	3.26184	3.29223	3.17259	3.53475	2.74914
Cell_0096	AMPKARt2	Insulin 10000 ng/ml	0.267592	0.423939	0.589482	0.598685	0.540296	0.411085	0.417053	0.642183	0.390414	0.47218	0.42091	0.588179	0.340966	0.498221	0.540318	0.438882	0.487998	0.347768	0.45303	0.516336	0.408613	0.665185	0.477798	0.630674	0.313225	0.488121	0.622106	0.646754	0.427846	0.328451	0.556079	0.569223	0.547054	0.406808	0.468741	0.419088	0.677052	0.392829	0.489136	0.377795	0.527172	0.622505	0.502844	0.600931	0.453495	0.60643	0.360984
Cell_0097	TFEB_TR	Insulin 10000 ng/ml	2.32522	1.29822	0.511384	1.29577	0.995632	1.21487	1.19993	0.776303	1.77295	2.30194	1.41238	1.2434	1.18772	1.79379	1.13387	1.77707	0.625965	1.40945	1.32855	2.03607	2.66271	3.16505	2.51009	0.926072	2.48633	0.80634	0.942089	3.22453	1.56937	1.56026	2.75632	0.535606	2.01284	1.46835	1.13149	1.28463	1.42846	1.18259	1.29646	2.62575	0.979121	0.485505	1.15314	1.24295	3.353	1.28797	2.27518
Cell_0097	FOXO_TR	Insulin 10000 ng/ml	2.61031	1.95252	2.79261	2.87136	3.93802	3.41561	2.82583	2.82309	2.59706	3.53668	3.17393	2.30216	0.963522	2.72706	4.67357	2.65803	2.49855	2.50569	2.28677	3.9596	3.37722	1.18765	3.26813	3.31291	3.36288	3.87097	3.19892	5.85522	3.7127	2.54598	2.7154	1.48755	4.90372	3.33051	3.50984	2.48169	3.00526	1.93771	2.89106	4.323	3.11489	2.10506	3.51804	3.21637	3.22019	3.7042	2.70079
Cell_0097	AMPKARt2	Insulin 10000 ng/ml	0.274817	0.433061	0.5704	0.603049	0.482466	0.434786	0.420369	0.649884	0.389221	0.485498	0.416582	0.588967	0.331656	0.486521	0.532418	0.460722	0.506787	0.349492	0.474658	0.487643	0.399498	0.66521	0.477278	0.622243	0.359757	0.468894	0.626056	0.645267	0.423939	0.337791	0.568698	0.536917	0.555168	0.415961	0.453713	0.465261	0.664232	0.372096	0.478635	0.374321	0.528469	0.598715	0.501457	0.602514	0.449023	0.596123	0.364454
Cell_0098	TFEB_TR	Insulin 10000 ng/ml	2.6855	1.34013	0.522256	1.00026	1.06638	1.09829	1.33685	0.716864	2.30785	2.2402	1.42016	1.43213	1.29996	1.79803	1.12233	1.79762	0.603837	1.69557	1.32229	2.28617	2.01981	2.80427	2.43511	0.995881	2.41299	0.815728	1.05695	3.77906	1.49809	1.47738	2.34095	0.708941	1.85108	1.55583	1.10056	1.39797	1.72186	1.2737	1.88645	2.65373	0.941288	0.381807	1.19033	1.30546	2.5819	1.32717	2.02411
Cell_0098	FOXO_TR	Insulin 10000 ng/ml	2.6368	1.87322	2.73747	2.8456	3.77838	3.35039	2.96874	2.7366	2.54959	3.30312	3.1496	3.07904	1.065	2.69558	4.60504	2.93411	2.23593	2.68062	2.25453	3.97942	2.88024	1.20807	3.05235	3.23924	3.47181	3.5259	3.04374	5.49147	3.60344	2.32551	2.58899	1.48446	5.10188	3.65999	3.77424	2.71191	3.15386	2.03739	2.75497	4.04505	3.33477	2.10601	3.55807	3.38325	3.01213	3.68184	2.77392
Cell_0098	AMPKARt2	Insulin 10000 ng/ml	0.262187	0.439065	0.57415	0.62075	0.487763	0.433549	0.39481	0.648407	0.389856	0.50368	0.391779	0.577758	0.338816	0.484071	0.540719	0.471364	0.500765	0.373355	0.459557	0.487503	0.403871	0.666182	0.493229	0.606897	0.378349	0.473702	0.620272	0.643383	0.411115	0.333018	0.613675	0.500843	0.551291	0.401429	0.444288	0.488887	0.677053	0.372663	0.466683	0.400673	0.553583	0.611585	0.506424	0.60716	0.442921	0.572621	0.354971
Cell_0099	TFEB_TR	Insulin 10000 ng/ml	2.587	1.68701	0.530541	0.501578	1.13658	0.979531	1.42605	0.78294	2.12249	2.10375	1.38614	1.51537	1.42058	1.70956	1.07515	1.65029	0.623323	2.02175	1.32255	2.50435	2.67866	0.744444	2.48461	1.10422	2.04969	0.795865	1.11072	2.91823	1.54578	1.64062	2.33388	0.623192	1.77765	1.99318	1.29222	1.18342	1.75747	1.65852	1.40729	2.75623	0.855159	0.35777	1.11361	1.3303	2.65508	1.41102	1.78152
Cell_0099	FOXO_TR	Insulin 10000 ng/ml	2.87504	2.38257	2.56056	1.8419	3.64947	3.41597	3.02149	2.92411	2.67858	3.36955	3.1937	3.28664	1.15125	2.59819	4.29322	2.66967	2.08615	2.76623	2.37567	4.2052	3.02467	1.18711	3.01634	3.28316	3.31627	3.73788	3.29209	5.37096	3.87727	2.18626	2.50051	1.54594	5.06971	3.61749	4.03144	2.35657	3.47299	2.45165	2.7235	4.24056	3.24639	2.0181	3.51847	3.29747	3.16482	3.80775	2.7159
Cell_0099	AMPKARt2	Insulin 10000 ng/ml	0.280908	0.407127	0.544183	0.695652	0.457881	0.458329	0.411522	0.618787	0.410919	0.510249	0.402646	0.575197	0.350764	0.500602	0.53279	0.46448	0.520096	0.370901	0.468393	0.459715	0.390176	0.679448	0.492053	0.629179	0.392841	0.478705	0.629567	0.642783	0.421516	0.325146	0.581744	0.444742	0.564422	0.392345	0.473014	0.48985	0.675097	0.340893	0.464508	0.394514	0.56544	0.610513	0.517187	0.59121	0.441955	0.559808	0.312718
Cell_0100	TFEB_TR	Insulin 10000 ng/ml	2.55291	1.52454	0.51846	0.489199	1.2173	0.898037	1.48758	0.859476	2.1579	2.12027	1.41337	1.51938	1.45647	1.78288	1.14443	1.61665	0.755202	2.09926	1.43571	2.71605	2.41658	1.93458	2.29284	0.929259	2.15705	0.767916	1.09364	3.8725	1.75429	1.75708	1.78367	0.858601	2.12319	1.94977	1.0654	1.08352	1.77963	1.48452	2.41494	4.40291	0.855853	0.430006	1.1688	1.44124	2.18618	1.44018	1.40032
Cell_0100	FOXO_TR	Insulin 10000 ng/ml	2.77164	2.94458	2.66082	1.84309	3.65665	3.38058	3.14133	3.16261	2.67272	3.37302	3.25682	3.31562	1.30233	2.62656	4.84197	2.62115	2.68312	2.80074	2.78535	4.50545	2.83851	1.2284	3.16314	2.90915	3.12952	3.43932	3.27627	5.22777	4.34734	2.41133	2.38617	1.49423	4.82126	3.49521	4.14381	2.27314	3.85343	2.47481	2.73006	4.12533	3.11465	1.87208	3.46296	3.49975	3.38476	3.95659	2.51895
Cell_0100	AMPKARt2	Insulin 10000 ng/ml	0.3064	0.424818	0.556808	0.707219	0.475733	0.453032	0.420979	0.609373	0.392525	0.498276	0.419482	0.571095	0.352465	0.494921	0.559467	0.448909	0.483596	0.382728	0.460305	0.452135	0.386141	0.690512	0.48885	0.633029	0.368299	0.475405	0.612179	0.611891	0.408199	0.351349	0.577686	0.420903	0.508766	0.388912	0.504571	0.482292	0.649833	0.350048	0.487525	0.374763	0.562531	0.59285	0.509921	0.590297	0.455462	0.565868	0.310858
Cell_0101	TFEB_TR	Insulin 10000 ng/ml	2.753	2.12171	0.527311	0.49662	1.23588	0.883335	1.49676	0.910872	0.449002	1.99426	1.48906	1.51454	1.52016	1.69181	1.09905	1.62203	0.838643	2.28087	1.4975	2.93428	2.08252	1.31562	2.38063	0.95837	2.86105	0.818092	1.22343	3.56848	1.7893	1.53496	2.02771	0.694687	1.92496	1.75538	1.08934	1.14937	1.46697	1.37619	1.67559	4.06844	0.843113	0.39179	1.22398	1.45526	2.64257	1.49306	1.49972
Cell_0101	FOXO_TR	Insulin 10000 ng/ml	2.75615	3.15402	2.72563	1.8356	3.65057	3.35279	3.22487	2.84893	2.26327	3.35568	3.33465	3.2913	1.53957	2.47863	4.75626	2.6169	2.63264	2.93935	2.95649	4.29671	2.46952	1.28711	2.96509	2.94597	3.35864	3.52244	3.16446	5.57741	4.3912	2.31741	2.26833	1.57556	4.80188	3.16803	4.52426	2.24597	3.54503	2.1491	2.82048	4.54626	2.97476	1.94479	3.40746	3.32393	3.23591	3.91706	2.40485
Cell_0101	AMPKARt2	Insulin 10000 ng/ml	0.300853	0.409796	0.569609	0.705066	0.4602	0.477551	0.419065	0.609373	0.651955	0.496874	0.42362	0.569524	0.354999	0.483321	0.593402	0.462988	0.47843	0.383744	0.47896	0.432705	0.372272	0.691998	0.483195	0.606049	0.349055	0.466436	0.613623	0.600645	0.433965	0.339083	0.574545	0.426548	0.512533	0.40464	0.524527	0.463348	0.64219	0.361845	0.530311	0.439379	0.544914	0.586868	0.502656	0.596725	0.474393	0.538718	0.262869
Cell_0102	TFEB_TR	Insulin 10000 ng/ml	1.94573	1.51065	0.545028	0.499525	1.27669	0.83488	1.57526	0.937903	0.577841	2.19374	1.39772	1.52397	1.92178	1.69158	1.03964	1.60955	0.857589	2.20946	1.4979	2.8726	1.98444	1.10495	2.14097	0.961575	2.01529	0.817925	1.09645	3.08999	1.7443	1.8836	2.31525	0.687669	1.86428	1.61319	0.998488	1.42305	1.90429	1.3457	2.22115	3.23533	0.891635	0.518228	1.23465	1.56212	1.57668	1.48752	1.52179
Cell_0102	FOXO_TR	Insulin 10000 ng/ml	2.62789	2.99424	2.75329	1.7333	3.50858	3.24571	3.18357	3.03078	2.29403	3.60268	3.10637	3.22771	1.7319	2.55045	4.82365	2.46284	2.60045	3.12088	2.73066	4.25783	2.27762	2.21771	2.89509	2.91543	3.3299	3.41845	2.86343	5.3617	4.37608	2.31668	2.35015	1.78695	4.54031	3.08928	4.4298	2.39355	3.52823	2.21056	2.61247	4.42974	3.21257	2.16869	3.64954	3.56392	3.06437	3.93856	2.26425
Cell_0102	AMPKARt2	Insulin 10000 ng/ml	0.291565	0.39401	0.573766	0.690929	0.476872	0.479229	0.406667	0.564514	0.653136	0.503597	0.428235	0.546218	0.375777	0.479055	0.62201	0.47242	0.486417	0.402694	0.468154	0.461123	0.357402	0.613803	0.501999	0.624644	0.336925	0.491205	0.618746	0.571513	0.434315	0.345601	0.557276	0.453578	0.451584	0.414714	0.50814	0.425869	0.67646	0.360398	0.508008	0.553384	0.52995	0.579125	0.497905	0.608292	0.564034	0.534248	0.279037
Cell_0103	TFEB_TR	Insulin 10000 ng/ml	1.58916	1.62595	0.539535	0.499861	1.2869	0.887222	1.57657	1.03411	0.522765	2.14801	1.34432	1.48803	1.69196	0.959198	0.937399	1.49413	0.858381	1.89265	1.55164	2.76571	1.76298	1.05774	2.17789	1.01655	2.16097	0.818083	0.867007	3.58883	1.73542	1.81212	1.83843	0.788059	1.77178	1.67158	1.00994	1.11804	1.63279	1.52996	2.27388	2.09427	0.94336	0.48927	1.28767	1.36171	1.76065	1.58691	1.31868
Cell_0103	FOXO_TR	Insulin 10000 ng/ml	2.67404	3.29533	2.66916	1.69209	3.53934	3.50318	3.14915	2.76896	2.38657	3.44337	3.20936	3.02341	1.2391	1.70896	4.6639	2.29674	2.82569	3.12578	2.83479	4.17153	2.25179	2.26358	2.86138	2.88956	3.47147	3.44852	2.69863	5.85092	4.30142	2.34407	2.16204	1.89488	4.18102	3.27733	4.17445	2.22123	3.27262	2.35254	2.53263	4.3206	3.12927	2.11895	3.79285	3.17594	2.85853	4.16744	2.40975
Cell_0103	AMPKARt2	Insulin 10000 ng/ml	0.310476	0.380401	0.552411	0.705268	0.464651	0.474549	0.401403	0.587793	0.642642	0.474371	0.450522	0.554271	0.371688	0.414333	0.620617	0.478241	0.457517	0.403125	0.467077	0.510315	0.37408	0.626131	0.513268	0.596659	0.330979	0.515934	0.634581	0.541714	0.435002	0.344253	0.529379	0.493166	0.440165	0.400028	0.471902	0.378106	0.685655	0.379271	0.541917	0.594248	0.507251	0.627538	0.480685	0.602155	0.574963	0.551076	0.31985
Cell_0104	TFEB_TR	Insulin 10000 ng/ml	2.31593	1.62999	0.536878	0.491926	1.21859	0.986695	1.62474	1.04145	0.441073	2.20791	1.25026	1.57633	1.43992	0.849814	0.879792	1.49466	0.909378	1.64324	1.59528	2.61967	1.99533	1.05864	2.20635	0.990321	3.02703	0.772999	1.04864	6.10827	1.57523	1.82471	1.73679	0.466056	1.93367	1.73039	1.05337	1.28786	1.79092	1.39207	1.43693	1.8364	0.916473	0.479673	1.49366	1.48342	2.41691	1.54464	1.56363
Cell_0104	FOXO_TR	Insulin 10000 ng/ml	2.68893	3.18733	2.45647	1.74796	3.41862	3.39462	3.15715	3.0378	2.51213	3.46602	3.22085	3.10318	1.11638	1.52858	4.52123	2.22676	2.82429	2.92301	2.89857	3.97782	2.18913	2.34197	2.7231	2.67031	3.18027	3.50095	2.7785	5.45878	3.7828	2.37419	2.18883	1.78692	4.11083	3.34323	4.02049	2.53315	3.22772	2.18659	2.47653	4.50226	2.97764	2.49596	3.58662	3.31431	2.84822	4.07503	2.50824
Cell_0104	AMPKARt2	Insulin 10000 ng/ml	0.321715	0.427556	0.569265	0.709582	0.478736	0.443559	0.379824	0.596085	0.640864	0.463175	0.463753	0.538159	0.363561	0.407746	0.630509	0.470402	0.442299	0.409362	0.458741	0.532318	0.350184	0.624083	0.510929	0.591657	0.289903	0.549006	0.643878	0.538436	0.450982	0.339012	0.508171	0.524702	0.420945	0.399772	0.483101	0.375422	0.688651	0.417861	0.528984	0.589607	0.514703	0.586212	0.482095	0.610005	0.556755	0.570499	0.350921
Cell_0105	TFEB_TR	Insulin 10000 ng/ml	1.96558	1.73461	0.518024	0.496801	1.16702	1.04768	1.68084	0.964892	0.453208	2.24776	1.13222	1.64407	1.33706	0.877141	0.880227	1.44863	0.951484	1.45033	1.69147	2.54508	1.96605	0.960175	2.12133	1.01661	2.92444	0.77803	1.04861	4.18981	1.43015	1.40027	1.77479	0.624405	1.91993	1.65873	1.00833	1.24374	1.70383	1.39225	1.8947	1.27355	0.959547	0.548376	1.59276	1.52133	2.85045	1.75466	1.23217
Cell_0105	FOXO_TR	Insulin 10000 ng/ml	2.35363	3.40872	2.41898	1.85629	3.49247	3.37091	3.12474	3.23457	2.54196	3.44699	2.94528	3.00313	1.05489	1.62689	4.52576	2.09629	3.07033	2.67251	1.68746	4.16501	2.34734	2.65127	2.69881	2.59682	3.49123	3.36083	2.74567	5.53418	3.38345	2.39765	2.20782	1.75313	4.27167	3.211	3.93436	2.53133	3.19304	2.23261	2.60648	4.72402	2.99169	3.31371	3.94324	3.36089	3.05498	4.54114	2.23225
Cell_0105	AMPKARt2	Insulin 10000 ng/ml	0.308944	0.445333	0.55643	0.698222	0.50211	0.422406	0.386872	0.581143	0.671284	0.42713	0.453709	0.556494	0.362744	0.392956	0.629562	0.474592	0.439352	0.391466	0.57131	0.544532	0.347842	0.598426	0.512268	0.602707	0.264582	0.561816	0.655388	0.534521	0.455431	0.340824	0.466328	0.59677	0.415205	0.403562	0.467638	0.402703	0.692412	0.404049	0.541507	0.594475	0.506601	0.612369	0.503367	0.609358	0.568774	0.551034	0.350444
Cell_0106	TFEB_TR	Insulin 10000 ng/ml	1.88349	1.73276	0.496867	0.490634	1.19747	1.10842	1.75698	1.01164	0.45432	2.29383	1.22108	1.6741	1.12638	1.01318	0.904683	1.43147	0.996612	1.32708	1.25994	2.36863	2.33241	1.4057	2.25013	1.10024	1.94602	0.706295	1.0276	3.73894	1.39499	1.77501	1.99602	0.99626	1.97044	1.60073	1.01589	1.56972	1.39861	1.24999	2.25091	0.883784	1.01129	0.494003	1.56643	1.56442	2.22393	1.77512	1.333
Cell_0106	FOXO_TR	Insulin 10000 ng/ml	2.30945	3.35901	2.43576	1.88913	3.48238	3.39599	3.22874	3.08744	2.31195	3.6127	3.13812	2.97947	0.958328	1.83748	4.49541	2.0622	3.03617	2.62084	1.80152	4.21605	2.44538	2.81814	2.64833	2.78959	3.47874	3.14046	3.01182	5.38249	3.52505	2.75634	2.32091	2.13189	4.20156	3.30871	3.85226	2.57925	3.26078	2.14675	2.57304	4.88656	2.84182	3.07154	3.78053	3.42165	3.09416	4.27181	2.18804
Cell_0106	AMPKARt2	Insulin 10000 ng/ml	0.310399	0.433007	0.5682	0.686232	0.49028	0.410661	0.386193	0.555375	0.627969	0.448235	0.453259	0.521633	0.348086	0.426162	0.61721	0.469829	0.439874	0.403128	0.57186	0.57213	0.3691	0.595585	0.498938	0.589333	0.27545	0.553654	0.632023	0.533988	0.454075	0.334832	0.451857	0.426363	0.404255	0.388262	0.467264	0.394639	0.696087	0.405681	0.559086	0.553492	0.513393	0.619931	0.519925	0.61357	0.558109	0.60213	0.387394
Cell_0107	TFEB_TR	Insulin 10000 ng/ml	1.51909	1.61579	0.515881	0.504182	1.21864	1.13442	1.7563	1.12422	0.673577	2.31268	1.24341	1.64959	1.26819	1.07389	0.891062	1.46756	0.996458	1.24495	1.33995	2.29492	2.21156	1.04438	2.20802	0.67977	1.65706	0.759271	0.946476	4.72049	1.23951	1.67958	2.60211	0.772587	1.87594	1.65538	1.09107	1.58417	1.23032	1.44562	2.18402	1.63881	1.13042	0.425551	1.63317	1.54828	2.28478	1.56725	1.33222
Cell_0107	FOXO_TR	Insulin 10000 ng/ml	2.37256	3.47235	2.3305	2.05508	3.58304	3.37671	3.12532	2.85301	2.46079	3.32484	2.90606	3.03556	0.994375	2.06895	4.38026	2.09963	2.83987	2.73831	1.76767	4.36211	2.45625	2.61971	2.72937	2.07691	3.13367	2.94468	2.98871	5.02688	3.01244	2.63735	2.41886	1.9894	4.1389	3.45576	4.11462	2.709	3.42134	2.08217	2.50667	4.96885	3.12051	3.12754	3.9412	3.20741	2.97846	4.26887	2.43833
Cell_0107	AMPKARt2	Insulin 10000 ng/ml	0.266646	0.430901	0.575789	0.730254	0.49471	0.410177	0.382425	0.576346	0.632064	0.430105	0.450034	0.510769	0.346362	0.421752	0.586661	0.476389	0.422369	0.415947	0.615394	0.560632	0.367526	0.595937	0.497466	0.656199	0.270922	0.530437	0.651725	0.530458	0.466739	0.322448	0.422837	0.37047	0.389839	0.402271	0.451065	0.402706	0.69494	0.38333	0.561706	0.57899	0.509451	0.601996	0.536015	0.614798	0.568504	0.599606	0.338924
Cell_0108	TFEB_TR	Insulin 10000 ng/ml	1.63516	1.40767	0.500267	0.516189	1.17338	1.24502	1.85791	1.08652	0.699897	2.09592	1.27944	1.5321	1.33156	1.02333	0.921212	1.47901	0.974896	1.14884	1.40127	2.27331	2.13069	1.2457	1.93136	0.630675	3.17086	0.79963	0.907976	3.3973	1.24232	1.78963	1.95246	0.758152	2.58509	1.7457	1.14031	1.64994	1.26341	1.47576	3.07962	1.74774	1.0817	0.484516	1.65254	1.54411	2.64472	1.34497	1.45066
Cell_0108	FOXO_TR	Insulin 10000 ng/ml	2.29171	3.50132	2.25546	2.18265	3.59532	3.29462	3.14617	2.83486	2.47608	3.29915	2.97545	2.70119	1.02737	1.97771	4.29903	2.08264	2.80074	2.73718	1.73115	4.38502	2.45731	2.93043	2.60548	1.76654	3.17193	2.84619	2.91887	4.84343	3.49607	2.59792	2.37264	2.24334	4.26802	3.42717	3.80829	2.90734	3.60889	2.04922	2.53931	4.77506	3.01524	2.87631	3.48927	3.4227	3.12916	3.97205	2.47225
Cell_0108	AMPKARt2	Insulin 10000 ng/ml	0.259071	0.449801	0.569668	0.741898	0.468668	0.373035	0.386117	0.543734	0.657094	0.417048	0.418251	0.475161	0.3329	0.394844	0.582016	0.468314	0.43306	0.453713	0.599905	0.559575	0.359528	0.580847	0.496679	0.645332	0.245931	0.512614	0.646211	0.539736	0.47061	0.353492	0.465009	0.404064	0.412187	0.412704	0.452082	0.441717	0.608696	0.356169	0.558186	0.540131	0.53157	0.589898	0.530858	0.630017	0.558406	0.621694	0.387739
Cell_0109	TFEB_TR	Insulin 10000 ng/ml	1.34677	1.46767	0.514135	0.546039	1.18503	1.31084	1.88017	1.24643	0.728389	1.79707	1.17302	1.69559	1.19179	1.04459	0.943779	1.51304	1.00947	1.05337	2.17618	2.3639	2.27107	1.11626	2.21828	0.62048	2.74361	0.841678	0.82484	4.53454	0.74754	1.60286	2.35685	0.659511	1.98811	1.68985	1.18955	1.64268	1.41777	1.29492	1.58379	1.64209	1.09751	0.539214	1.43301	1.50246	3.09242	1.3148	1.30505
Cell_0109	FOXO_TR	Insulin 10000 ng/ml	2.27636	3.02106	2.34501	2.25224	3.65571	3.43465	3.07824	2.98369	2.67648	3.1559	2.93194	2.90373	1.10259	2.20785	4.74828	2.22389	3.14561	2.86835	1.59129	4.44995	2.60211	2.96156	2.72141	1.63972	3.08102	2.65079	3.04975	4.77286	2.0345	2.31371	2.83899	2.03495	4.14378	3.41957	3.50196	3.10337	3.41044	2.01539	2.57055	4.63395	2.91905	2.98832	3.41245	3.3576	3.1839	4.21924	2.53861
Cell_0109	AMPKARt2	Insulin 10000 ng/ml	0.266005	0.454519	0.589402	0.727567	0.4631	0.388212	0.397098	0.544679	0.644767	0.432811	0.421639	0.453577	0.332733	0.420414	0.564465	0.476157	0.429017	0.455022	0.587282	0.572737	0.354377	0.560238	0.459645	0.63989	0.264873	0.494478	0.643983	0.541113	0.508386	0.37939	0.415908	0.368544	0.402182	0.410087	0.453099	0.437152	0.570827	0.368673	0.545112	0.527833	0.520195	0.603254	0.5257	0.635621	0.553174	0.613301	0.420851
Cell_0110	TFEB_TR	Insulin 10000 ng/ml	1.40506	1.88236	0.536053	0.536824	1.16603	1.3912	1.91693	1.27557	0.743909	1.97482	1.15097	1.69524	1.25393	1.29077	1.01113	1.51159	1.07293	1.00758	2.02177	2.41219	2.30711	1.09192	2.17371	0.593372	3.25868	0.905837	0.846767	3.9121	0.800752	1.61067	2.17817	0.947038	2.58237	1.7438	1.54966	2.03665	1.43035	1.27736	2.21704	2.57078	1.1103	0.608038	1.75958	1.42592	2.48595	1.11792	1.51078
Cell_0110	FOXO_TR	Insulin 10000 ng/ml	1.93107	3.1129	2.44186	2.07537	3.55027	3.28687	2.96131	2.76029	3.22163	3.39514	3.19093	3.03859	1.17216	2.95299	4.72847	2.18651	2.80515	2.89611	1.45901	4.43075	2.69479	3.23964	2.6299	1.45585	2.99353	2.51817	3.24129	4.58487	2.03193	2.64575	2.48761	1.9375	4.21338	3.44613	3.36586	3.45996	3.32853	2.00811	2.53594	4.56872	3.07404	5.11731	3.42661	3.12455	3.14001	4.0793	2.41828
Cell_0110	AMPKARt2	Insulin 10000 ng/ml	0.243649	0.450738	0.589499	0.732775	0.476097	0.355003	0.394916	0.523109	0.654101	0.417628	0.419096	0.444543	0.34604	0.437996	0.5409	0.488802	0.449032	0.458078	0.57037	0.574138	0.370589	0.556691	0.469209	0.643402	0.276067	0.489468	0.629716	0.544487	0.518398	0.400573	0.467486	0.336587	0.432943	0.396611	0.474384	0.425534	0.541662	0.371252	0.521691	0.502838	0.53337	0.59182	0.529865	0.659574	0.510181	0.632053	0.404862
Cell_0111	TFEB_TR	Insulin 10000 ng/ml	1.40124	1.7604	0.513017	0.544164	1.17275	1.41073	1.90211	1.27515	0.767178	1.87508	1.18719	1.64131	1.1369	1.24347	1.05568	1.49165	1.0504	1.0302	0.847826	2.41696	2.25561	0.851231	2.31391	0.563853	1.74093	0.93248	0.858002	3.38777	0.823244	1.90784	1.69494	0.923002	2.50939	0.594584	2.02662	1.70308	1.47221	1.22114	1.84521	2.43293	1.05247	0.783204	1.34286	1.3382	2.70741	1.11817	1.69936
Cell_0111	FOXO_TR	Insulin 10000 ng/ml	1.9562	3.30626	2.3687	2.10816	3.7109	3.1785	3.02078	2.7518	3.11013	3.4666	3.03521	2.82249	1.27878	2.15531	4.69318	2.1307	2.90497	2.98683	1.3412	4.59777	2.64585	3.04141	2.80936	1.37722	3.18812	2.45521	3.28772	3.88485	2.0951	3.16659	2.25521	1.92619	4.51762	2.83899	3.76874	3.26184	3.80131	2.03317	2.52541	4.53266	2.85349	5.92247	3.32988	3.04203	3.28137	3.92349	2.85734
Cell_0111	AMPKARt2	Insulin 10000 ng/ml	0.237962	0.460293	0.586517	0.731198	0.458182	0.379399	0.405845	0.494578	0.628151	0.425819	0.424387	0.431862	0.351809	0.373167	0.513544	0.46206	0.468281	0.444341	0.593096	0.568885	0.338415	0.563394	0.455345	0.63852	0.270779	0.485132	0.638751	0.566767	0.515778	0.412419	0.431366	0.329214	0.455248	0.539474	0.490336	0.418238	0.478072	0.363857	0.51803	0.492654	0.535783	0.548735	0.526997	0.67974	0.488207	0.629975	0.36175
Cell_0112	TFEB_TR	Insulin 10000 ng/ml	1.70636	1.78189	0.520468	0.548326	1.32094	1.46544	1.86146	1.61117	1.2666	1.91602	1.29484	1.57969	1.27837	1.29671	1.19268	1.50199	1.0552	0.977842	1.34102	2.39138	2.14755	1.86876	2.23835	0.575873	2.46439	0.945168	0.871001	4.13401	0.818769	1.66716	1.52998	0.804215	2.72663	0.558287	1.7262	1.78361	1.93169	1.44627	2.05129	1.63027	1.02986	0.818743	1.45461	1.26027	2.79635	1.15143	1.40662
Cell_0112	FOXO_TR	Insulin 10000 ng/ml	1.81002	3.40793	2.51007	2.03452	3.67271	3.0788	2.926	2.87618	2.70097	3.45821	3.13556	2.63102	1.34601	1.9334	4.85936	2.166	2.9769	2.81222	1.40452	4.30914	2.44097	2.99864	2.74483	1.43829	3.02611	2.27857	3.33104	3.96042	2.16006	3.03915	2.24304	2.09147	4.72828	2.52013	3.60055	3.16319	3.92608	2.10728	2.68498	4.49454	2.94116	5.85044	3.75287	3.13953	3.28406	4.06163	2.79751
Cell_0112	AMPKARt2	Insulin 10000 ng/ml	0.251086	0.457081	0.611762	0.720609	0.462741	0.352713	0.401603	0.488995	0.651464	0.410215	0.400923	0.461709	0.344292	0.3608	0.502808	0.475943	0.439481	0.445504	0.589196	0.548728	0.342843	0.567707	0.455813	0.639179	0.258097	0.481485	0.618236	0.63	0.525637	0.348502	0.439078	0.309916	0.481214	0.554043	0.479241	0.412225	0.453626	0.359689	0.477367	0.472382	0.558323	0.504761	0.521096	0.675494	0.480243	0.637475	0.301075
Cell_0113	TFEB_TR	Insulin 10000 ng/ml	1.32506	1.74876	0.514404	0.548885	1.35983	1.48371	1.89429	1.51657	0.940848	1.97961	1.34608	1.54276	1.22721	1.49538	1.2627	1.51588	1.07799	1.00759	1.29934	2.35132	2.10651	1.10441	2.42829	0.607098	1.82027	0.92892	0.82504	3.97354	0.876501	2.30294	1.36503	0.859159	2.59134	0.532386	1.42579	2.03748	1.89646	1.45068	0.856829	3.35281	1.00843	0.759248	1.34126	1.12706	2.61612	1.27295	1.31736
Cell_0113	FOXO_TR	Insulin 10000 ng/ml	1.80989	3.34638	2.73394	2.24019	3.64307	3.06838	2.90012	3.21576	2.28087	3.5118	2.93635	2.53073	1.24218	1.99272	4.83372	2.18876	2.60689	3.10582	1.43955	4.32534	2.48877	2.96617	2.74758	1.5604	2.84905	2.33296	3.34556	4.02543	2.31987	3.02334	2.23087	2.16245	4.56301	2.27335	3.43237	3.09615	3.50264	2.15013	3.92501	4.75402	2.80638	6.20533	3.44404	2.89637	3.45798	4.11227	2.73317
Cell_0113	AMPKARt2	Insulin 10000 ng/ml	0.24573	0.451313	0.590372	0.735342	0.428963	0.35303	0.414348	0.48793	0.660193	0.442241	0.404255	0.450971	0.340403	0.394767	0.482155	0.478506	0.42348	0.452809	0.586415	0.543701	0.350269	0.546436	0.459161	0.647414	0.256406	0.53488	0.582018	0.63234	0.512677	0.347627	0.44679	0.30303	0.486629	0.557441	0.468146	0.412555	0.430278	0.350037	0.623299	0.456844	0.57703	0.554246	0.527951	0.670187	0.509792	0.617521	0.339849
Cell_0114	TFEB_TR	Insulin 10000 ng/ml	1.28796	2.09799	0.500146	0.552777	1.3279	1.53897	1.82904	1.56019	0.726344	2.18561	1.22402	1.45943	1.17976	1.48922	1.31236	1.5194	1.08985	1.0237	2.6588	2.32489	2.2013	1.33172	2.18284	0.603096	1.63188	0.9014	0.861872	4.0567	1.01217	1.83629	1.5908	0.814159	3.15922	0.567015	1.34179	1.76481	2.15636	1.4274	0.797762	3.06964	0.940733	0.951263	1.65645	1.07755	3.88979	1.49678	1.55357
Cell_0114	FOXO_TR	Insulin 10000 ng/ml	1.84349	3.41168	2.59183	2.48882	3.56595	3.17273	2.80095	3.3876	2.07451	3.74682	2.89099	2.32323	1.10884	2.1235	4.42433	2.16993	2.62765	3.0946	1.3756	4.09875	2.61868	2.72981	2.85859	1.58959	2.69901	2.33606	3.21288	3.89099	2.41235	3.2385	2.33444	1.8645	4.96034	2.23219	3.04863	3.0072	3.50325	2.09331	2.31028	4.42554	2.68187	6.25497	3.61888	2.94328	3.22468	4.04365	3.26421
Cell_0114	AMPKARt2	Insulin 10000 ng/ml	0.31188	0.442605	0.588396	0.723593	0.428503	0.378384	0.407457	0.495837	0.678908	0.452003	0.413918	0.453543	0.340558	0.406448	0.490875	0.489527	0.422323	0.434026	0.579838	0.510866	0.35497	0.53766	0.466924	0.64697	0.272761	0.530483	0.570494	0.638926	0.508992	0.335631	0.457973	0.309728	0.465187	0.554045	0.515602	0.406932	0.403023	0.333717	0.580296	0.443561	0.577175	0.497931	0.509789	0.649145	0.460208	0.622045	0.314824
Cell_0115	TFEB_TR	Insulin 10000 ng/ml	1.78621	1.49266	0.521646	0.61166	1.40303	1.40304	1.76339	1.62464	0.871031	2.16199	1.21473	1.48082	1.01899	1.43588	1.44899	1.43997	1.02678	1.04492	1.36303	2.30288	2.37096	1.10702	2.96086	0.599365	1.66444	0.925857	0.865716	3.35522	1.07359	2.02114	1.29697	1.00017	2.49696	0.614561	1.70023	1.65823	1.72708	1.56823	0.871636	4.59576	0.925324	0.944851	1.8644	0.591431	2.13135	1.25555	1.20405
Cell_0115	FOXO_TR	Insulin 10000 ng/ml	1.91372	3.42341	2.66008	2.71493	3.53819	3.14237	2.78624	3.36816	2.22114	3.62997	2.67598	2.42188	1.15571	2.48812	4.83546	2.0385	2.50745	3.20504	1.34979	4.05359	2.74794	2.89902	2.99924	1.64006	3.00257	2.38587	3.05735	3.67929	2.25371	3.16257	2.04237	1.97403	4.44659	2.23013	2.79732	2.60036	2.94164	2.06025	3.82559	4.19229	2.70907	5.46315	3.62275	1.55756	3.27791	3.8677	2.77207
Cell_0115	AMPKARt2	Insulin 10000 ng/ml	0.38232	0.424851	0.595623	0.713022	0.409736	0.3703	0.424145	0.558258	0.672174	0.465272	0.417809	0.441375	0.331238	0.441201	0.471241	0.475651	0.411255	0.419523	0.578138	0.501355	0.344427	0.562234	0.450211	0.640735	0.304114	0.52085	0.519585	0.627741	0.522212	0.34122	0.501301	0.297217	0.44443	0.52081	0.496828	0.401857	0.387178	0.349846	0.600904	0.42553	0.577706	0.489272	0.51499	0.602509	0.425775	0.584578	0.304145
Cell_0116	TFEB_TR	Insulin 10000 ng/ml	1.66315	2.10849	0.495934	0.60586	1.49535	1.48751	1.74217	1.68367	0.622251	2.2447	1.25585	1.49381	1.16299	1.33911	1.53599	1.43143	1.00874	1.01307	2.37343	2.10769	2.73168	1.52959	2.90915	0.586718	1.98093	0.915477	0.884399	4.32103	1.01407	2.37597	1.27573	0.749586	3.29722	0.671941	1.58114	1.72327	1.90796	1.50829	0.607384	2.82847	0.907126	0.851467	1.83644	0.624874	1.71521	1.43485	1.50043
Cell_0116	FOXO_TR	Insulin 10000 ng/ml	2.08753	3.34747	2.6966	2.45475	3.60195	3.19191	2.70887	3.47527	2.12679	3.64909	2.50265	2.40765	1.13612	2.0754	5.04199	2.0911	2.4734	2.95421	1.46358	3.81266	2.75672	2.87492	2.86382	1.60717	2.77801	2.26273	3.07287	3.67915	2.1319	3.03222	1.79574	2.01964	4.65098	2.43069	2.82441	2.50246	3.22155	2.10344	2.17668	4.60696	2.77716	4.86168	3.59344	1.5684	3.28283	3.80368	3.37155
Cell_0116	AMPKARt2	Insulin 10000 ng/ml	0.387578	0.420643	0.576223	0.70774	0.416764	0.368055	0.412804	0.575477	0.691652	0.469535	0.443288	0.462183	0.329085	0.39869	0.460045	0.483837	0.407492	0.415069	0.560247	0.486903	0.336809	0.542995	0.466922	0.631885	0.344871	0.527304	0.509612	0.625209	0.522699	0.328579	0.462069	0.309339	0.432388	0.482535	0.460042	0.414764	0.394947	0.471665	0.571211	0.420131	0.558395	0.396421	0.499106	0.618049	0.413905	0.589563	0.255796
Cell_0117	TFEB_TR	Insulin 10000 ng/ml	1.67363	1.67913	0.49187	0.608228	1.42859	1.41407	1.68784	1.2798	0.735918	2.31538	1.37482	1.48938	1.29084	1.41311	1.59485	1.41975	1.05286	1.05368	2.20866	2.20774	2.6134	1.68338	2.53128	0.594422	1.79372	0.948159	0.948912	3.55885	1.02189	2.04043	1.37341	0.810145	3.14973	0.718282	1.17844	1.56065	1.52413	1.38711	1.09275	2.76994	0.935971	1.41814	1.99242	0.606441	2.20819	1.64504	1.35574
Cell_0117	FOXO_TR	Insulin 10000 ng/ml	2.22033	3.44511	2.65546	2.39961	3.58923	3.15942	2.73722	3.23898	2.12855	3.70402	2.7536	2.31182	1.25203	2.33487	4.78375	2.19835	2.37132	3.0171	1.4616	3.66053	2.76181	3.01928	3.09705	1.58936	3.08068	2.22143	2.93768	3.72708	2.20766	2.991	2.04563	2.13583	4.67415	2.2227	3.02905	2.51998	3.23444	2.04713	3.88219	4.58157	2.8824	4.86442	3.67367	1.69159	3.20329	3.97598	3.03074
Cell_0117	AMPKARt2	Insulin 10000 ng/ml	0.404272	0.433303	0.592989	0.723994	0.389899	0.362362	0.412418	0.568312	0.69811	0.455592	0.430578	0.477295	0.345525	0.414102	0.466075	0.486821	0.420978	0.390734	0.550712	0.458032	0.354555	0.55419	0.465337	0.63164	0.361962	0.507995	0.47078	0.624686	0.519213	0.342622	0.467048	0.329034	0.418308	0.477677	0.507781	0.408231	0.394881	0.503972	0.573016	0.3991	0.548913	0.390383	0.501376	0.607362	0.397921	0.584205	0.263076
Cell_0118	TFEB_TR	Insulin 10000 ng/ml	2.12388	1.72015	0.51803	0.593592	1.37583	1.37154	1.68956	1.44059	0.70563	2.29923	1.34123	1.53311	1.2692	1.5546	1.66885	1.38601	1.10387	1.10545	1.26794	2.42078	2.37115	1.65146	2.71089	0.60607	2.32886	0.957334	1.00097	4.05969	0.816973	1.77419	1.4107	0.725364	3.95431	0.745161	1.15553	1.50012	1.83565	1.14513	1.21456	2.18237	0.93546	1.19263	1.72307	0.571157	2.53159	2.11948	1.36837
Cell_0118	FOXO_TR	Insulin 10000 ng/ml	2.47178	3.26733	2.91963	2.42568	3.3499	3.11158	2.84803	3.5007	2.51518	3.71345	2.82089	2.43644	1.4811	2.52768	4.6345	2.07525	2.26802	3.08644	1.45311	3.8148	2.60134	3.00336	3.00162	1.67266	3.02505	2.19343	2.69996	3.29134	2.20895	2.77535	2.14364	2.25036	4.47957	2.21574	2.62844	2.50668	3.30474	2.01606	4.09666	4.51573	2.84504	5.19117	3.80456	1.81294	3.12433	4.01113	3.15968
Cell_0118	AMPKARt2	Insulin 10000 ng/ml	0.402722	0.419348	0.548692	0.7315	0.393918	0.382046	0.397732	0.585164	0.673464	0.429473	0.423483	0.455828	0.349766	0.459206	0.461156	0.469397	0.433314	0.398896	0.506228	0.436637	0.360998	0.554234	0.450147	0.63164	0.343613	0.499687	0.451677	0.612366	0.524918	0.342836	0.43722	0.299128	0.389662	0.484933	0.479372	0.408571	0.38294	0.509669	0.566513	0.403289	0.55055	0.4511	0.488436	0.608829	0.386287	0.582838	0.243197
Cell_0119	TFEB_TR	Insulin 10000 ng/ml	2.50617	1.89536	0.534586	0.689917	1.43137	1.44034	1.65917	1.29182	0.657515	2.33902	1.37821	1.51146	1.22513	1.38995	1.73126	1.33462	1.11461	1.20595	1.45044	2.49413	2.31948	1.39766	2.7825	0.607457	1.77642	0.967614	0.999376	3.38907	0.980727	1.89298	1.50285	0.718829	2.71817	0.800287	1.66724	1.93375	1.61458	1.09042	0.946791	2.00217	0.961754	1.15259	1.85959	0.629849	1.6126	1.89992	1.47461
Cell_0119	FOXO_TR	Insulin 10000 ng/ml	2.36648	3.34171	3.16374	3.57786	3.34615	3.16921	2.87915	3.36485	2.99786	3.84079	2.99848	2.2919	1.59066	2.26491	4.49669	2.01066	2.00974	3.35639	1.57585	3.76066	2.53817	2.82806	3.21902	1.71027	3.30162	2.34051	2.50115	3.5042	2.36909	2.9463	1.89408	1.89225	4.44123	2.12806	2.41339	2.66433	3.59464	2.04154	4.10805	4.43557	2.89711	4.71839	3.70644	2.17082	3.06817	3.80103	2.89535
Cell_0119	AMPKARt2	Insulin 10000 ng/ml	0.418456	0.401247	0.584607	0.674643	0.402727	0.362881	0.405515	0.586289	0.676767	0.411024	0.4237	0.478399	0.356297	0.423667	0.467439	0.474355	0.428757	0.396012	0.474583	0.435812	0.34021	0.566254	0.459225	0.6247	0.364759	0.489583	0.436365	0.590742	0.563443	0.383694	0.40329	0.297028	0.393032	0.52056	0.458868	0.384598	0.376159	0.515769	0.567366	0.45677	0.543447	0.460322	0.503833	0.595524	0.398208	0.570343	0.237901
Cell_0120	TFEB_TR	Insulin 10000 ng/ml	1.77603	2.04612	0.538917	0.812522	1.47429	1.49004	1.62342	1.24425	0.813802	2.40646	1.38675	1.4952	1.20802	1.49967	1.77489	1.19437	1.18363	1.20798	1.21439	2.3608	2.38436	1.16427	2.76099	0.627275	1.89313	0.987525	1.06314	2.86227	0.998531	1.99866	1.63455	0.752292	3.22021	0.809631	1.65158	1.36456	1.82628	1.15993	1.00346	2.46703	0.992054	1.45995	1.65696	0.749155	2.53868	1.85392	1.34085
Cell_0120	FOXO_TR	Insulin 10000 ng/ml	2.36247	3.44109	3.05648	3.76429	3.39197	3.15384	2.87671	3.72322	2.8056	3.87177	2.90396	2.1435	1.61192	2.29191	4.59787	1.81262	1.97871	3.28889	1.48696	3.77348	2.40995	2.81307	3.3557	1.81336	3.03605	2.3231	2.74795	3.34929	2.72965	3.13811	2.11303	2.04581	4.73067	2.2643	3.15991	2.53098	3.5126	2.05106	4.56948	4.52672	2.89147	4.44193	3.53561	2.91654	2.95096	3.97262	2.77355
Cell_0120	AMPKARt2	Insulin 10000 ng/ml	0.421932	0.390385	0.577764	0.691155	0.392612	0.351679	0.421968	0.56218	0.688671	0.387608	0.431268	0.488267	0.365562	0.446915	0.452282	0.471653	0.431824	0.384983	0.462976	0.441885	0.343523	0.575078	0.461319	0.643787	0.316656	0.490577	0.433051	0.567983	0.546197	0.378736	0.370314	0.29352	0.399087	0.623835	0.448153	0.366818	0.400323	0.502407	0.570763	0.543816	0.552234	0.462004	0.507148	0.565647	0.427053	0.588064	0.23074
Cell_0121	TFEB_TR	Insulin 10000 ng/ml	1.68293	1.99005	0.532323	0.806166	1.44682	1.49268	1.60425	1.54796	0.93689	2.48154	1.37417	1.47801	1.23888	1.69534	1.76094	1.3855	1.20981	1.20203	1.44032	2.44927	2.333	1.19494	2.95346	0.607181	2.19088	1.00195	1.06302	3.74911	0.90608	2.14383	2.40955	0.883318	3.61541	0.767727	1.46694	1.78109	1.75202	1.24736	0.779639	2.24325	1.03139	1.43408	1.46102	0.629826	2.10368	1.61573	1.43374
Cell_0121	FOXO_TR	Insulin 10000 ng/ml	2.27303	3.81719	2.84786	4.08756	3.372	3.08685	2.86538	3.73889	3.88262	4.00531	2.99506	2.1809	1.67989	2.59817	4.1933	2.03245	2.05003	3.29776	1.51618	3.81873	2.55446	2.8715	3.4413	1.91034	3.14549	2.42062	2.89833	3.44955	2.56976	3.3174	2.5902	1.92776	4.59053	2.12995	2.29712	2.33329	3.54043	2.01608	4.48809	4.65644	2.97178	4.18109	3.70968	2.65871	2.90009	4.05964	2.768
Cell_0121	AMPKARt2	Insulin 10000 ng/ml	0.408188	0.375432	0.585268	0.693019	0.424557	0.383159	0.421211	0.558199	0.641488	0.420291	0.428906	0.478755	0.348636	0.429044	0.47404	0.475991	0.434088	0.401787	0.433703	0.472277	0.319308	0.585808	0.462289	0.631532	0.31012	0.481328	0.430706	0.57998	0.574432	0.381175	0.325298	0.284952	0.418516	0.692356	0.49044	0.36346	0.388649	0.499878	0.599676	0.581847	0.542587	0.445242	0.512388	0.573973	0.425121	0.595152	0.189123
Cell_0122	TFEB_TR	Insulin 10000 ng/ml	1.17891	2.70511	0.513514	0.767691	1.33161	1.50861	1.57109	1.5168	0.998491	2.52011	1.33782	1.48957	1.37649	1.43197	1.60999	1.38469	1.16872	1.21653	1.89413	2.55147	2.33374	1.63711	2.87678	0.618813	1.99752	1.02756	1.04981	3.38729	0.89309	2.12865	1.71968	0.788328	1.57349	0.65607	1.60439	1.62082	1.81664	1.24601	0.955314	1.45705	1.01115	1.36836	2.1936	0.722026	2.55348	1.81865	1.35523
Cell_0122	FOXO_TR	Insulin 10000 ng/ml	2.72091	3.9109	2.84009	4.18035	3.52109	3.16695	2.86912	3.86374	3.89929	3.80504	3.03783	2.16482	1.7085	2.40401	4.02845	1.98382	1.86927	3.30874	1.68241	4.08123	2.41698	2.87383	3.56898	2.19212	3.38254	2.38443	2.59448	3.38483	2.62873	3.14187	2.07559	1.99429	3.80978	2.07983	2.74182	2.21163	3.54276	2.03459	4.44499	4.65874	2.94148	3.98846	3.3547	2.35753	2.96962	3.98198	2.52202
Cell_0122	AMPKARt2	Insulin 10000 ng/ml	0.602374	0.348497	0.584376	0.69629	0.478267	0.361797	0.424257	0.526355	0.594093	0.379933	0.427478	0.451525	0.35849	0.439233	0.483999	0.46734	0.418787	0.393097	0.424177	0.513101	0.322042	0.576205	0.489787	0.633597	0.318157	0.522106	0.425152	0.57228	0.567648	0.366771	0.430902	0.281232	0.510618	0.695607	0.489631	0.364744	0.42455	0.487969	0.569219	0.58282	0.552986	0.465725	0.498108	0.580898	0.44875	0.624897	0.204213
Cell_0123	TFEB_TR	Insulin 10000 ng/ml	1.30949	2.1588	0.500399	0.775271	1.20119	1.50396	1.54597	1.91287	1.22091	2.63643	1.39003	1.54072	1.19646	1.91715	1.58667	1.40397	1.13033	1.22556	1.61948	2.54745	2.3307	1.55827	2.85923	0.608258	2.20798	1.0219	1.06539	4.27862	0.960906	2.20297	1.67232	1.01927	2.88921	0.653426	1.52159	1.79714	1.88126	1.131	0.766056	1.26818	0.998207	1.6101	1.61174	0.681983	2.85904	1.76357	1.70487
Cell_0123	FOXO_TR	Insulin 10000 ng/ml	2.66461	3.8904	2.7313	4.19006	3.5176	3.20953	2.80744	3.83342	4.09891	3.70425	3.04858	2.04442	1.43986	4.71144	4.07909	2.05834	1.71042	3.16176	1.79087	3.93089	2.42937	2.8368	3.44108	2.14625	3.33158	2.29012	2.57491	3.63094	2.56178	3.09656	2.30013	2.03751	4.11187	2.10422	3.19963	2.4434	3.5451	1.94371	4.35726	4.43272	3.02951	3.49092	3.40862	2.41147	2.99336	4.0808	2.76591
Cell_0123	AMPKARt2	Insulin 10000 ng/ml	0.604025	0.370321	0.595034	0.686187	0.509182	0.377453	0.426167	0.521757	0.547923	0.385572	0.415459	0.444923	0.35075	0.481078	0.491068	0.477275	0.399373	0.406423	0.44637	0.530495	0.313644	0.578638	0.494144	0.628804	0.309251	0.532839	0.424837	0.60766	0.568144	0.342136	0.439064	0.303737	0.49117	0.687365	0.485129	0.38936	0.460451	0.495128	0.571884	0.594094	0.550367	0.456192	0.521317	0.588328	0.441941	0.631181	0.175034
Cell_0124	TFEB_TR	Insulin 10000 ng/ml	1.09175	2.63936	0.494178	0.77978	1.13181	0.417914	1.49344	2.09004	1.28745	2.56778	1.494	1.52688	1.31331	1.58841	1.55055	1.44254	1.068	1.23037	1.01692	2.43438	2.28152	1.33808	2.84176	0.592701	2.42881	1.07892	1.19128	3.04254	0.834548	1.95591	1.2491	1.00317	2.61126	0.652019	1.65307	1.58579	1.69354	1.13995	0.926301	1.73963	0.97552	1.70136	1.93852	0.848165	3.66646	1.47151	1.31201
Cell_0124	FOXO_TR	Insulin 10000 ng/ml	2.61883	3.75142	2.73319	4.29022	3.59713	3.33534	2.83735	4.06626	3.91462	3.6977	3.13719	1.80608	1.37239	3.84152	4.13149	2.09706	1.6387	3.20368	1.9834	3.71444	2.45012	2.95681	3.3202	2.31706	3.31528	2.41745	2.62841	3.56883	2.32242	2.99192	1.77778	2.04032	4.17719	2.0701	2.99347	2.26949	3.64666	1.95832	3.9475	4.77105	3.03381	3.28727	3.665	2.45906	2.96752	3.94563	2.56942
Cell_0124	AMPKARt2	Insulin 10000 ng/ml	0.607365	0.390142	0.573199	0.680324	0.518491	0.674599	0.426711	0.50005	0.534178	0.390208	0.422919	0.42342	0.35902	0.500826	0.495775	0.464566	0.405166	0.408043	0.457519	0.553889	0.334931	0.57298	0.514683	0.615469	0.276389	0.52283	0.423547	0.640371	0.586413	0.366414	0.456173	0.297695	0.502156	0.689042	0.472458	0.427609	0.508698	0.457622	0.560327	0.57248	0.565267	0.44932	0.57353	0.579775	0.42299	0.635342	0.18451
Cell_0125	TFEB_TR	Insulin 10000 ng/ml	1.27006	2.52471	0.490596	0.779757	1.10665	0.412727	1.49869	2.36654	1.33271	2.54015	1.44913	1.50924	1.19149	1.65977	1.5082	1.39937	1.12671	1.19656	1.4022	2.50468	2.7703	1.27485	3.24627	0.626454	2.86411	1.0873	1.2585	4.18251	0.697524	2.08335	1.55959	0.807523	2.33331	0.605199	1.88482	1.39468	1.65635	1.07375	0.870944	1.82609	0.968774	1.31312	1.40095	0.786206	3.13328	1.39169	1.30745
Cell_0125	FOXO_TR	Insulin 10000 ng/ml	2.55245	3.80671	2.75355	4.25058	3.50474	3.31427	2.80292	4.20263	3.75623	3.53131	3.04099	1.61229	1.22365	3.93455	4.4117	2.02168	1.53936	3.2134	2.11031	4.01119	2.91849	2.88461	3.23647	2.3882	3.14644	2.55236	2.64639	3.76961	2.03436	3.04692	2.09646	1.96557	4.24252	1.94668	2.68423	2.28029	3.69147	1.81117	3.75358	4.40862	2.99207	3.4859	3.50019	2.55382	2.8654	3.77297	2.2415
Cell_0125	AMPKARt2	Insulin 10000 ng/ml	0.591568	0.429831	0.573873	0.673352	0.51318	0.675672	0.445501	0.493289	0.536017	0.472593	0.424637	0.414371	0.346911	0.450361	0.513964	0.46416	0.400864	0.403834	0.337074	0.546904	0.291258	0.591119	0.544702	0.621259	0.310028	0.517104	0.420308	0.648501	0.600888	0.377752	0.459202	0.321309	0.513141	0.68311	0.474816	0.490064	0.538845	0.401355	0.580737	0.57715	0.560015	0.474946	0.564495	0.581528	0.417184	0.626822	0.208482
Cell_0126	TFEB_TR	Insulin 10000 ng/ml	1.43505	1.86686	0.499672	0.812174	1.03622	0.427526	1.51467	2.77005	1.40196	2.14524	0.699319	1.49879	1.30908	1.57414	1.46921	1.48424	1.16355	1.16596	1.7718	2.3748	2.32843	1.48475	2.79419	0.697506	2.79346	1.06534	1.24258	3.27101	0.653383	2.08464	1.77243	0.698878	2.02633	0.651539	1.50142	1.2191	1.74042	1.24665	0.803818	1.27869	0.958429	1.42619	1.56719	0.796229	3.71909	1.3494	1.35277
Cell_0126	FOXO_TR	Insulin 10000 ng/ml	2.58522	3.69424	2.82296	4.02154	3.41599	3.15071	2.76811	3.97081	3.77912	3.4458	2.38988	1.49432	1.28866	3.71176	4.35717	2.1991	1.33868	3.09847	2.33307	3.67584	2.48633	2.83383	3.24007	2.13997	2.99582	2.50393	2.52208	3.91612	1.67199	2.71025	2.2234	1.91064	4.31139	2.18451	2.77526	2.15585	3.81539	1.77358	3.50585	4.27353	3.19831	3.92531	3.28574	2.65602	2.83503	3.87291	1.95176
Cell_0126	AMPKARt2	Insulin 10000 ng/ml	0.576723	0.455229	0.5766	0.640603	0.514613	0.671328	0.426201	0.449704	0.515634	0.488067	0.522657	0.417019	0.340931	0.424921	0.540609	0.472061	0.382855	0.410393	0.32438	0.524573	0.329509	0.563486	0.563327	0.612432	0.28531	0.524229	0.442266	0.641928	0.616755	0.401115	0.425912	0.363093	0.481955	0.669318	0.484504	0.524226	0.54963	0.386037	0.594555	0.569583	0.552951	0.49037	0.575012	0.62452	0.409097	0.61106	0.22833
Cell_0127	TFEB_TR	Insulin 10000 ng/ml	1.3402	1.70811	0.506377	0.857374	1.05332	0.464263	1.49979	1.85607	1.56804	2.29523	0.923686	1.44351	1.166	1.4876	1.38917	1.40678	1.12484	1.15464	1.51083	2.42781	2.13415	1.7837	2.79703	0.742816	1.79671	1.0923	1.1664	4.44165	0.664472	1.89232	1.77597	0.871616	2.09471	0.596146	1.41602	1.3903	1.52943	1.2122	0.827564	1.79519	0.892645	1.15019	1.64487	0.885925	3.54816	1.46687	1.10319
Cell_0127	FOXO_TR	Insulin 10000 ng/ml	2.73451	3.5688	2.69049	4.10674	3.51556	3.20226	2.79895	3.57419	3.47939	3.60994	2.35794	1.31901	1.30279	3.20432	4.6343	2.09937	1.21321	3.08945	2.27817	3.80143	2.30993	3.12856	3.17956	3.33871	3.18529	2.65476	2.59441	3.86685	1.56484	2.59789	2.15398	1.95724	4.05983	2.19036	2.65758	2.37104	3.63812	1.68981	4.15644	4.14683	2.98252	3.65525	3.27844	2.98991	2.95712	3.76077	1.6236
Cell_0127	AMPKARt2	Insulin 10000 ng/ml	0.56465	0.435512	0.583951	0.637437	0.516692	0.65496	0.441961	0.474352	0.501657	0.498222	0.504172	0.436581	0.347286	0.428479	0.591865	0.473493	0.393001	0.387297	0.280979	0.527737	0.347922	0.556947	0.547849	0.616902	0.290171	0.496418	0.526598	0.639864	0.632337	0.427337	0.476884	0.416497	0.453862	0.630311	0.500024	0.525784	0.536616	0.397829	0.602036	0.583013	0.565625	0.506564	0.555849	0.603311	0.394461	0.619926	0.268706
Cell_0128	TFEB_TR	Insulin 10000 ng/ml	1.40748	1.54729	0.48692	0.867812	1.11135	0.475092	1.459	1.8017	1.60784	2.3401	0.769546	1.39293	1.26339	1.61943	1.21264	1.77496	1.14782	1.12069	1.48343	2.2478	2.16705	1.28569	3.13782	0.811494	1.81115	1.14638	1.09312	2.65265	0.752134	1.85956	1.7193	0.865926	2.48424	0.62406	1.32506	1.28449	1.66669	1.30597	0.91081	1.49615	0.867868	1.07148	1.57266	0.952057	3.18021	2.28659	1.14635
Cell_0128	FOXO_TR	Insulin 10000 ng/ml	2.5383	3.40481	2.67081	4.06618	3.62596	3.52121	2.75921	2.89802	3.84232	3.6271	2.18972	1.21033	1.23258	3.19682	4.56854	2.57414	1.2115	2.92349	2.51326	3.50007	2.34566	3.18885	3.16893	3.62282	3.17468	2.56522	2.46777	4.00685	1.52085	2.80714	1.83638	2.03669	3.91793	2.25414	3.35407	2.50876	3.70638	1.64078	3.87681	4.25886	3.006	4.26989	3.18721	3.25321	2.86715	3.90805	1.76757
Cell_0128	AMPKARt2	Insulin 10000 ng/ml	0.560329	0.453684	0.574076	0.633781	0.497737	0.643127	0.443218	0.46419	0.503973	0.530025	0.504957	0.439217	0.33964	0.407541	0.608804	0.434092	0.391513	0.400855	0.272708	0.505303	0.340915	0.577018	0.55859	0.622317	0.294843	0.489111	0.565738	0.634674	0.620933	0.430101	0.501396	0.498705	0.472533	0.579636	0.508171	0.532833	0.531612	0.38198	0.535516	0.572087	0.541091	0.444566	0.567855	0.597727	0.401744	0.602226	0.255087
Cell_0129	TFEB_TR	Insulin 10000 ng/ml	1.41576	1.7359	0.496609	0.926382	1.21723	0.481987	1.42109	1.5958	1.27694	2.25952	0.732033	1.3753	1.20523	1.59136	1.03271	4.58316	1.13047	1.09952	1.61614	2.39665	1.85176	1.49554	2.5345	0.81711	2.11414	1.1292	1.10859	3.5148	0.985157	2.09503	1.01966	0.834194	2.85487	0.634236	1.41148	1.37253	1.81166	1.23094	0.944177	1.67684	0.84879	0.872523	1.50044	1.00967	3.79621	1.61842	1.14041
Cell_0129	FOXO_TR	Insulin 10000 ng/ml	2.70639	3.42829	2.55753	4.36358	3.44305	3.09283	2.80462	2.75589	4.10548	3.48039	1.91729	1.04955	1.31584	3.26486	4.11085	2.58597	1.27362	2.79048	2.53621	3.70481	1.98193	3.17954	3.13909	3.83009	2.8009	2.71249	2.65528	3.94645	2.85449	2.40809	1.40692	1.93183	3.89261	2.3599	2.86511	2.6028	3.79762	1.4733	3.88807	4.29057	3.18033	4.335	3.09598	3.1223	3.00744	3.88679	1.68132
Cell_0129	AMPKARt2	Insulin 10000 ng/ml	0.606996	0.460528	0.612907	0.598954	0.477447	0.632157	0.439903	0.449625	0.522908	0.5195	0.48642	0.461755	0.319705	0.386162	0.620876	0.463371	0.415098	0.417201	0.256292	0.508986	0.333141	0.568873	0.564051	0.602441	0.290555	0.47515	0.566565	0.612886	0.49157	0.429068	0.507165	0.535128	0.496537	0.545788	0.448374	0.504501	0.511561	0.398934	0.580048	0.574268	0.560306	0.475899	0.579861	0.594203	0.382706	0.583122	0.272498
Cell_0130	TFEB_TR	Insulin 10000 ng/ml	1.31974	1.51624	0.483082	0.948675	1.30089	0.469956	1.3867	1.58947	1.31978	2.32694	0.720898	1.33446	1.23477	1.77744	0.923206	3.9153	1.01472	1.10485	3.56831	2.484	1.76811	1.44973	2.73225	0.799489	2.23158	1.11974	1.13172	3.9103	0.96985	1.9489	1.02972	0.844173	2.35999	0.771729	1.51841	1.2488	1.77328	1.11672	0.924866	2.03397	0.893433	0.955486	1.47903	1.23456	3.13074	1.57459	1.15687
Cell_0130	FOXO_TR	Insulin 10000 ng/ml	2.69231	3.42844	2.39485	4.22655	3.59068	3.17805	2.80169	2.43913	3.69124	3.60871	1.88888	0.926385	1.21782	3.77509	4.00312	2.577	1.19489	2.9151	2.51329	3.76435	2.81373	3.0104	3.19687	3.60424	3.12053	2.72444	2.64849	4.08	2.71209	2.90345	1.38636	2.0085	3.95824	2.49394	3.06521	2.75479	3.58372	1.41735	3.59753	4.52126	3.17604	3.5717	3.16527	2.60215	2.91117	3.884	1.6676
Cell_0130	AMPKARt2	Insulin 10000 ng/ml	0.624014	0.46114	0.614578	0.619801	0.456433	0.601631	0.455182	0.462302	0.59321	0.493245	0.488533	0.453434	0.3332	0.404229	0.610894	0.463239	0.416834	0.422916	0.239932	0.488607	0.493633	0.574581	0.559113	0.597378	0.293533	0.513895	0.585502	0.603742	0.427901	0.415933	0.540775	0.537331	0.473547	0.53241	0.447147	0.502734	0.505084	0.384475	0.531892	0.561516	0.551287	0.428166	0.595322	0.590084	0.385984	0.598698	0.266804
Cell_0131	TFEB_TR	Insulin 10000 ng/ml	1.87608	1.76024	0.463714	0.991297	1.46692	0.498929	1.43561	1.56512	1.51537	2.2473	0.693104	1.31749	1.24878	1.83326	0.856092	3.99166	1.00431	1.05896	2.36128	2.4573	1.81874	1.47571	2.72597	0.853069	2.70926	1.11028	1.12662	3.42872	0.944111	1.85873	0.87927	0.624231	2.26428	0.748606	1.801	1.40988	1.94261	0.961359	0.905556	2.29338	0.891869	0.869795	1.46855	1.21721	2.67213	1.74116	0.993493
Cell_0131	FOXO_TR	Insulin 10000 ng/ml	2.57135	3.43344	2.38214	4.1884	3.79768	3.14818	2.71818	2.38386	3.68283	3.51829	2.00811	0.859927	1.30953	3.9704	4.12302	2.67548	1.21758	2.81491	2.49329	3.67172	2.58622	3.06504	3.13697	3.70192	3.15562	2.73638	2.79729	3.97796	2.45632	3.45649	1.17041	1.97005	3.99842	2.48993	3.00083	2.51048	3.47811	1.33376	3.30699	4.45474	3.14649	3.63848	2.8884	2.28216	2.97695	4.08169	1.49426
Cell_0131	AMPKARt2	Insulin 10000 ng/ml	0.594829	0.447497	0.592207	0.618251	0.435443	0.612057	0.459528	0.464712	0.620261	0.474346	0.474565	0.457833	0.33734	0.371928	0.612821	0.444698	0.40805	0.423441	0.244859	0.506233	0.517144	0.569976	0.561342	0.569593	0.301529	0.55264	0.592469	0.560702	0.344171	0.403996	0.515912	0.548898	0.466982	0.515243	0.454465	0.53202	0.50435	0.395348	0.483737	0.531998	0.536276	0.415203	0.616053	0.623957	0.415527	0.604133	0.280405
Cell_0132	TFEB_TR	Insulin 10000 ng/ml	1.68889	1.98755	0.475938	1.0185	1.51837	0.53652	1.41182	1.44794	1.40878	2.45745	0.734015	1.32263	1.09462	1.65254	0.844131	1.47854	1.0461	1.03112	1.49888	2.33442	1.30997	1.02597	2.77769	0.896482	1.93843	0.925629	1.19604	4.17989	0.930066	2.36472	1.04233	0.758483	2.20479	0.757704	1.659	1.26745	2.07833	1.14939	0.995195	1.52676	0.884431	0.811043	1.55222	1.23723	2.21352	1.57861	1.76999
Cell_0132	FOXO_TR	Insulin 10000 ng/ml	2.60544	3.83683	2.47067	4.10738	3.97563	2.99522	2.70938	2.76956	3.78898	3.45872	1.93128	0.849236	1.26024	3.85885	4.13434	2.75896	1.08941	2.61082	2.40922	3.74574	2.26736	3.10851	3.12566	3.61515	3.17453	1.50171	2.83081	4.05034	2.373	3.28468	1.27181	1.77495	3.98423	2.26897	3.00873	2.80418	3.54816	1.35765	3.46601	4.30656	3.16764	3.56957	2.79908	2.22956	3.04273	3.88147	2.43713
Cell_0132	AMPKARt2	Insulin 10000 ng/ml	0.592238	0.427655	0.586503	0.602186	0.452658	0.627715	0.455688	0.493544	0.589492	0.455422	0.504316	0.458601	0.338171	0.394679	0.613791	0.403483	0.462535	0.41502	0.246399	0.48647	0.57014	0.601401	0.538381	0.570264	0.346683	0.331742	0.569511	0.540153	0.345023	0.391173	0.492314	0.522642	0.46694	0.445268	0.455735	0.556739	0.47393	0.350737	0.587364	0.517785	0.512868	0.447167	0.602962	0.609064	0.44507	0.584692	0.118498
Cell_0133	TFEB_TR	Insulin 10000 ng/ml	1.24889	2.27648	0.471744	1.0619	1.53277	0.555383	1.38533	1.27907	1.6005	2.57037	0.692021	1.30853	1.25101	1.80356	0.842344	1.59565	0.919867	1.10589	2.66857	2.3813	1.61607	0.998084	2.84305	0.951357	2.6526	0.849498	1.21205	3.15541	0.794728	1.91379	0.861947	0.596654	1.84797	0.776127	1.6501	1.40845	1.81935	0.960148	1.07691	2.71908	0.918359	0.91994	1.4698	1.21829	3.48937	1.42115	1.1797
Cell_0133	FOXO_TR	Insulin 10000 ng/ml	2.67732	3.60533	2.28169	4.00582	3.64704	3.16639	2.61181	2.66239	4.26451	3.72613	2.11346	0.825895	1.35545	4.25014	3.87011	3.0452	1.14919	2.91719	2.53729	3.80565	2.01702	2.78249	3.09596	3.5235	3.37475	1.54055	2.57192	3.714	2.56519	3.39206	1.11412	1.87796	3.66874	2.44852	2.07516	2.9887	3.74418	1.36332	3.99256	4.29206	3.08573	3.26988	2.78414	2.29294	2.97361	3.75815	1.62476
Cell_0133	AMPKARt2	Insulin 10000 ng/ml	0.607689	0.431403	0.605707	0.595214	0.414068	0.628332	0.449063	0.54364	0.597694	0.442733	0.492113	0.443641	0.341572	0.392724	0.607645	0.401564	0.488519	0.411168	0.23629	0.480721	0.619514	0.59217	0.539057	0.567596	0.428862	0.329572	0.581825	0.5397	0.3104	0.383382	0.518704	0.518444	0.443348	0.442755	0.386608	0.570887	0.484154	0.34308	0.55074	0.485724	0.520052	0.404595	0.593589	0.651208	0.502759	0.575576	0.262316
Cell_0134	TFEB_TR	Insulin 10000 ng/ml	1.11836	1.97917	0.484784	1.06712	1.58713	0.511374	1.39046	1.14007	2.3293	2.19881	0.7681	1.30506	1.19616	1.67778	0.855318	1.75	0.927984	1.07717	2.88376	2.40568	1.34286	1.50825	2.675	0.980849	1.9295	0.615382	1.18439	4.77071	0.904772	2.28487	0.521688	0.889258	2.66124	0.766839	1.82658	1.14069	1.70441	1.14525	1.13413	1.64376	0.957167	0.661509	1.32317	1.00749	3.17453	1.84096	1.86291
Cell_0134	FOXO_TR	Insulin 10000 ng/ml	2.70418	3.50048	2.26549	4.07748	3.91047	3.17206	2.6907	2.78628	4.18697	3.32855	2.28311	0.839152	1.1826	3.70827	3.80749	2.98511	1.17107	2.63912	2.55158	3.73073	1.92319	2.80271	3.12203	3.71245	3.38871	1.46197	2.43692	3.87459	2.55628	3.47446	3.10379	2.01256	3.86366	2.45398	2.46631	2.9817	3.6501	1.57312	4.19023	4.24016	3.38298	3.56427	2.97296	2.65986	2.89087	3.71694	2.25093
Cell_0134	AMPKARt2	Insulin 10000 ng/ml	0.629306	0.408515	0.581749	0.578131	0.422539	0.666458	0.473367	0.55274	0.594114	0.432932	0.471907	0.441853	0.363189	0.404679	0.588234	0.407031	0.484644	0.41933	0.218587	0.49694	0.65869	0.602826	0.534972	0.544984	0.470971	0.336211	0.562268	0.534812	0.307239	0.37905	0.660656	0.511823	0.466281	0.441545	0.41104	0.562089	0.463794	0.311241	0.518619	0.464973	0.501384	0.569192	0.556517	0.639237	0.526948	0.571999	0.204866
Cell_0135	TFEB_TR	Insulin 10000 ng/ml	1.564	2.16869	0.462203	1.10467	1.64709	0.508842	1.34091	1.23871	1.64321	2.38212	0.79699	1.33696	1.31622	1.65087	0.848498	1.88294	0.923251	1.10714	1.98965	2.47065	1.53669	1.25173	2.63056	1.05662	2.34801	0.79446	1.23498	5.72216	0.922143	2.07106	0.57635	0.607842	2.16004	0.815371	1.57301	1.47991	2.82249	1.35882	1.35336	3.26381	0.998123	0.802434	1.59705	1.18453	2.62187	1.71331	1.62172
Cell_0135	FOXO_TR	Insulin 10000 ng/ml	2.64672	3.62067	2.1708	3.89634	3.6131	3.44936	2.57645	3.28863	4.24765	3.2377	2.24038	0.873167	1.06105	3.93722	3.64247	2.96334	1.07771	2.60209	2.48472	3.8192	1.97989	2.6913	3.15208	3.98287	3.41252	1.39264	2.7572	3.88833	2.68908	3.29803	3.04526	1.86554	3.7366	2.65845	2.85738	3.02576	3.64447	1.85946	4.54015	4.33421	2.92126	3.74445	3.09381	4.19764	2.73189	3.86502	2.313
Cell_0135	AMPKARt2	Insulin 10000 ng/ml	0.651126	0.404497	0.576046	0.548512	0.407475	0.685569	0.465922	0.548027	0.588359	0.42887	0.486983	0.432097	0.33886	0.408032	0.582772	0.403104	0.488691	0.418576	0.250389	0.492252	0.691669	0.608246	0.526713	0.513931	0.509594	0.460756	0.542089	0.535078	0.290111	0.384746	0.662494	0.523588	0.542904	0.434803	0.473252	0.559103	0.439375	0.306475	0.522684	0.46204	0.486917	0.587711	0.55184	0.546653	0.489536	0.59867	0.221691
Cell_0136	TFEB_TR	Insulin 10000 ng/ml	1.24446	2.64609	0.481887	1.11084	1.60191	0.5301	1.38369	1.05353	1.51429	2.70757	1.04473	1.34297	1.13672	1.66564	0.912742	2.9309	0.964586	1.10158	3.02523	2.5399	1.69923	1.24725	2.77405	1.16977	2.16246	0.960529	1.41187	4.52425	0.927081	2.27889	0.50852	0.61484	1.67251	0.822781	1.54869	1.0464	1.79085	1.33636	1.44155	1.70336	0.93995	0.876776	1.30524	1.23822	2.04435	1.9306	1.70723
Cell_0136	FOXO_TR	Insulin 10000 ng/ml	2.59379	3.55888	2.24598	3.92623	3.66874	3.60646	2.61672	3.12331	4.31393	3.50143	2.41523	0.799288	1.01176	3.56048	3.79112	2.93959	1.10725	2.81387	2.37692	3.8501	1.99202	2.51473	3.10427	3.96769	3.14128	1.30278	2.78593	3.55229	2.6353	3.26466	2.97216	1.98433	3.4328	2.49958	3.02147	3.54527	3.39442	1.80292	4.71988	4.11108	2.60108	4.7321	3.21608	3.53428	2.74009	3.97753	2.31631
Cell_0136	AMPKARt2	Insulin 10000 ng/ml	0.630939	0.361441	0.583835	0.575374	0.407619	0.683001	0.471081	0.540678	0.562423	0.418324	0.498747	0.438452	0.332633	0.397327	0.584238	0.432618	0.483226	0.435622	0.241873	0.495762	0.685153	0.593428	0.536014	0.506562	0.515613	0.506063	0.479739	0.534138	0.289579	0.37614	0.657505	0.487842	0.563708	0.421815	0.607936	0.571925	0.43908	0.314239	0.487366	0.508317	0.499416	0.398616	0.526075	0.514763	0.483111	0.619274	0.214299
Cell_0137	TFEB_TR	Insulin 10000 ng/ml	1.60463	1.64327	0.490429	1.11919	1.60792	0.542042	1.40503	1.14489	1.51979	2.70298	0.930466	1.35143	1.25351	1.53548	0.932814	4.12769	1.02537	0.959772	1.70745	2.27338	1.73797	1.91448	2.56776	1.34029	2.90633	0.710513	1.39786	7.22975	1.05872	1.77418	0.516778	0.697836	1.58223	0.811651	1.54776	1.21869	1.75219	1.26846	1.38688	3.43046	0.883862	0.791452	1.54778	1.27705	2.75689	2.44946	1.16529
Cell_0137	FOXO_TR	Insulin 10000 ng/ml	2.59948	3.16404	2.25531	4.12457	3.78198	3.50264	2.70439	3.27668	4.38206	3.55435	2.49478	0.831717	1.11083	4.00444	3.52607	2.97184	1.31853	2.57761	2.38655	3.59164	2.07509	2.61065	2.99958	4.3999	3.26355	1.33137	2.68352	3.08165	2.75526	3.02896	2.8975	1.89552	3.30684	2.60266	2.4614	3.13503	3.76525	1.95482	4.47117	3.99389	2.44465	5.24038	3.4697	4.19861	2.75212	3.97099	2.09317
Cell_0137	AMPKARt2	Insulin 10000 ng/ml	0.640739	0.355527	0.583568	0.588572	0.428919	0.702871	0.465833	0.542049	0.537734	0.396699	0.437504	0.465264	0.313006	0.416732	0.578759	0.42868	0.461762	0.45394	0.211321	0.486854	0.678717	0.592799	0.508378	0.495699	0.470134	0.507464	0.445286	0.547463	0.252475	0.393414	0.644178	0.415675	0.56059	0.435693	0.500983	0.586698	0.442756	0.294506	0.513203	0.580704	0.514516	0.502356	0.52558	0.517491	0.474101	0.626006	0.20492
Cell_0138	TFEB_TR	Insulin 10000 ng/ml	1.01469	1.89456	0.51731	1.11146	1.55824	0.481312	1.40767	1.29758	1.51106	2.57071	0.816959	1.31941	1.16157	1.48103	1.01172	2.43178	0.994882	0.937936	2.72074	2.28147	1.36703	1.04319	2.72957	1.41733	2.13449	0.87637	1.52928	3.90762	1.12852	2.30177	0.614967	0.707061	1.65187	0.808817	1.47853	1.13713	2.37542	1.38999	1.33939	2.19037	0.796931	1.53946	1.557	1.23429	2.7943	1.68	1.6203
Cell_0138	FOXO_TR	Insulin 10000 ng/ml	2.62345	3.25131	2.36583	4.11675	3.6147	3.25526	2.73579	3.19612	4.40958	3.44498	2.67968	0.807176	1.1411	4.19337	3.86054	2.93578	1.27055	2.68361	2.36372	3.56244	1.99	2.5578	3.13942	4.52332	3.21537	1.44028	2.58287	2.68464	2.62963	3.12092	3.05413	1.9464	3.28314	2.54889	2.91757	3.21193	3.86198	1.88776	4.40548	3.99782	2.14344	5.72854	3.34637	4.4721	2.94913	3.85377	2.30466
Cell_0138	AMPKARt2	Insulin 10000 ng/ml	0.645162	0.345957	0.579724	0.6169	0.45025	0.693238	0.468238	0.543364	0.492329	0.430255	0.440943	0.432962	0.315157	0.469015	0.571137	0.419084	0.454592	0.456903	0.236567	0.499157	0.6926	0.586212	0.512014	0.476537	0.44906	0.497975	0.417873	0.596148	0.301242	0.377422	0.644529	0.401563	0.555933	0.46105	0.482109	0.602424	0.451295	0.293352	0.484763	0.646399	0.476868	0.421785	0.493193	0.508822	0.449253	0.63006	0.228828
Cell_0139	TFEB_TR	Insulin 10000 ng/ml	1.38068	1.57039	0.528577	1.03821	1.50371	0.499172	1.35002	1.42807	1.70418	2.49945	1.15704	1.44919	1.15621	1.66213	1.02725	2.28877	0.954983	1.05108	1.85119	2.49081	1.66402	1.75243	2.31989	1.48688	2.47708	0.869585	1.61031	4.18127	1.1838	2.31778	0.533313	0.856776	1.81293	0.795217	1.60623	1.13173	2.099	1.23383	1.72474	1.93308	0.772189	1.66855	2.33493	1.23917	2.41587	1.54454	1.58744
Cell_0139	FOXO_TR	Insulin 10000 ng/ml	2.57446	3.36744	2.44179	3.79798	3.67179	3.44824	2.80508	3.43542	4.66948	3.48632	2.79905	0.936395	1.12384	3.97392	3.54219	2.85269	1.25311	2.8171	2.40704	3.6885	1.98773	2.42196	3.11127	4.43033	3.49898	1.62273	2.78362	2.51857	2.56149	3.24243	3.32334	1.91354	3.50506	2.53915	2.1682	2.76014	3.78053	1.91666	4.24368	4.18277	2.16807	5.84356	3.45681	4.75212	3.00465	4.01123	2.46663
Cell_0139	AMPKARt2	Insulin 10000 ng/ml	0.666734	0.354395	0.591182	0.600603	0.49886	0.684145	0.479578	0.542132	0.463615	0.466269	0.44239	0.403139	0.333932	0.383274	0.579315	0.469926	0.455874	0.430717	0.244064	0.48916	0.699946	0.571159	0.504439	0.476823	0.429983	0.513003	0.419048	0.637767	0.341343	0.398596	0.642504	0.385684	0.563689	0.494618	0.450788	0.592284	0.454754	0.352366	0.468599	0.644768	0.494433	0.416246	0.481626	0.503284	0.439336	0.6421	0.213621
Cell_0140	TFEB_TR	Insulin 10000 ng/ml	1.24425	1.95512	0.537733	1.0707	1.40426	0.598725	1.43924	1.58905	2.32451	2.51384	0.925395	1.4521	1.16549	1.8385	1.05628	2.83682	0.975086	1.0688	2.28035	2.45835	2.07992	2.61376	2.85289	1.48613	2.30846	0.800442	1.65287	3.18775	1.10713	2.65874	0.600947	0.792186	1.71084	0.79718	1.20937	1.1725	1.89144	1.27432	2.36679	1.25814	0.780613	1.59637	1.72353	1.25035	2.883	1.01006	1.83251
Cell_0140	FOXO_TR	Insulin 10000 ng/ml	2.54475	3.68563	2.51681	4.1447	3.7069	3.63051	2.76042	3.29071	4.50048	3.41218	2.53805	1.01034	1.138	4.12006	3.54239	3.02202	1.16639	2.84748	2.45737	3.79481	2.15718	2.37212	3.02873	4.45851	3.68969	1.76263	2.57864	2.23638	2.53307	3.09572	3.34335	2.08406	3.10936	2.64996	2.2336	2.94992	3.7126	1.86928	4.18663	4.5143	2.10796	5.28725	3.47661	5.25213	2.85925	1.52577	2.57167
Cell_0140	AMPKARt2	Insulin 10000 ng/ml	0.639312	0.340608	0.595073	0.608761	0.503662	0.640864	0.454531	0.530643	0.444546	0.477428	0.4818	0.418165	0.336357	0.382721	0.573325	0.490783	0.44623	0.422464	0.256628	0.480812	0.685051	0.555063	0.511675	0.48788	0.402044	0.51551	0.415117	0.665571	0.336246	0.385069	0.628982	0.360448	0.563666	0.554579	0.461781	0.61077	0.514059	0.416095	0.432079	0.643675	0.454499	0.303991	0.485487	0.483003	0.414488	0.505228	0.236163
Cell_0141	TFEB_TR	Insulin 10000 ng/ml	1.16561	1.58031	0.546052	1.04708	1.28999	0.471054	1.45758	1.65754	2.4539	2.41769	0.946189	1.47093	1.24294	1.8649	1.10658	4.04215	0.919777	1.02261	2.20929	2.38304	2.9556	1.49592	2.69081	1.43037	1.96516	0.948463	1.82408	2.90274	1.13421	2.62699	0.703912	0.861858	1.60398	0.728141	1.31436	1.19805	2.00318	1.16512	1.69076	1.21634	0.709968	1.40064	1.68677	1.26733	2.75669	0.950865	1.79707
Cell_0141	FOXO_TR	Insulin 10000 ng/ml	2.51652	3.66947	2.75603	3.99624	3.73091	2.60039	2.81898	3.73835	4.7573	3.26397	2.41282	1.07697	1.10036	4.53258	3.70005	3.01061	1.27949	2.37066	2.52006	3.96562	2.64281	2.30488	3.14025	4.02312	3.58524	1.88349	2.80005	2.41355	2.96399	3.40118	3.57269	2.35413	3.08777	2.40884	2.19076	2.85111	3.86569	1.96501	3.85967	4.54682	2.15976	5.20755	3.37744	4.7514	2.88311	1.52128	2.97293
Cell_0141	AMPKARt2	Insulin 10000 ng/ml	0.655837	0.405755	0.5994	0.594673	0.500316	0.67154	0.459469	0.540035	0.413386	0.470767	0.486528	0.406197	0.324785	0.349411	0.566651	0.503673	0.460338	0.394872	0.253552	0.485237	0.658348	0.589973	0.502908	0.505756	0.374026	0.489044	0.413452	0.709399	0.310364	0.419735	0.633252	0.351167	0.553401	0.605564	0.455184	0.623918	0.548724	0.454475	0.448079	0.629141	0.481699	0.30797	0.484816	0.489876	0.413711	0.509062	0.243488
Cell_0142	TFEB_TR	Insulin 10000 ng/ml	1.13117	2.86341	0.574137	1.04683	1.20852	0.520604	1.46111	1.68901	2.41929	2.42805	0.697414	1.45324	1.40357	1.95077	1.18553	1.96011	0.96908	1.06931	2.50629	2.3373	1.52736	1.20688	2.75688	1.33562	3.43805	1.18611	1.69226	3.35785	1.25422	2.40559	0.628287	0.846569	1.56064	0.711582	1.41936	1.38566	1.49078	1.28845	2.15377	0.830818	0.682155	1.47743	1.94152	1.60495	2.39778	0.843325	1.76571
Cell_0142	FOXO_TR	Insulin 10000 ng/ml	3.35006	3.71974	2.82848	4.02627	3.57798	2.65174	2.8625	3.74191	4.52246	3.29783	2.24719	1.37069	1.1452	4.60291	3.79285	3.13755	1.55536	2.37558	2.4798	4.00794	2.6195	2.34795	3.12169	3.75484	3.66093	1.63991	2.57437	2.69823	2.84423	3.01389	3.09797	1.76878	3.04729	2.71165	2.14792	2.82814	3.93404	2.06635	4.24513	4.60802	2.49649	3.69946	3.2399	4.64718	2.75643	1.43726	2.8673
Cell_0142	AMPKARt2	Insulin 10000 ng/ml	0.618471	0.444815	0.585947	0.581341	0.511772	0.670992	0.468948	0.514127	0.416823	0.462949	0.458737	0.397227	0.33762	0.345693	0.568394	0.467697	0.453141	0.389578	0.253708	0.477734	0.603403	0.609695	0.503364	0.550955	0.341034	0.320999	0.417546	0.718459	0.368603	0.404894	0.630775	0.335904	0.563242	0.602658	0.448587	0.626174	0.558471	0.46511	0.469836	0.663807	0.508892	0.335003	0.490095	0.475122	0.394375	0.538257	0.23655
Cell_0143	TFEB_TR	Insulin 10000 ng/ml	1.61103	1.67444	0.549882	1.04779	1.18417	0.411599	1.44978	1.56218	2.89158	2.45926	1.09289	1.44916	1.14184	2.0201	1.19456	2.24415	1.0287	1.11647	1.68788	2.41822	1.71302	1.16003	2.64352	1.16743	2.35654	1.04247	1.84877	3.30068	1.16891	1.84685	0.619933	0.708777	1.5153	0.691631	1.52436	1.1246	1.81192	1.39989	2.84772	1.40934	0.675909	1.51099	1.72236	1.52159	1.92271	0.895364	1.3526
Cell_0143	FOXO_TR	Insulin 10000 ng/ml	3.58623	3.54934	2.74782	4.05255	3.6734	3.13231	2.85342	3.36404	4.7395	3.41556	2.47942	1.36954	1.04613	3.9778	3.91464	3.16952	1.77862	2.18463	2.47273	3.90454	2.49167	2.23202	3.13899	3.62199	3.43623	1.40884	2.81468	2.72686	3.25218	2.90115	3.2129	1.71348	2.91235	2.74129	2.10508	2.85777	4.1757	2.16562	4.21547	4.60347	2.48942	4.36228	3.30691	4.82904	2.73337	1.45635	2.74853
Cell_0143	AMPKARt2	Insulin 10000 ng/ml	0.582254	0.466502	0.596786	0.561061	0.484736	0.673868	0.474096	0.517409	0.417639	0.466224	0.441109	0.410747	0.346851	0.313967	0.548311	0.464188	0.460981	0.392046	0.241781	0.488426	0.581522	0.613003	0.505702	0.541943	0.299307	0.275829	0.416307	0.71997	0.423151	0.388589	0.640457	0.324832	0.546646	0.536518	0.44199	0.638788	0.55639	0.464326	0.479695	0.646661	0.488282	0.340567	0.470945	0.479684	0.39388	0.562487	0.249457
Cell_0144	TFEB_TR	Insulin 10000 ng/ml	2.09896	1.5794	0.553243	1.03794	1.25741	0.503099	1.42816	1.44811	1.97626	2.40589	0.87756	1.37138	1.33452	1.82989	1.19237	3.09499	1.05937	1.13312	1.73774	2.53774	1.66929	7.1513	2.45068	1.06852	3.14147	1.09078	1.88153	3.24352	1.13851	2.13716	0.616043	0.799089	1.65571	0.739537	1.44423	1.07113	1.89241	1.40039	2.40568	1.15871	0.634899	2.09754	2.03782	1.57543	4.57535	0.877764	1.97838
Cell_0144	FOXO_TR	Insulin 10000 ng/ml	3.53043	3.29898	2.94717	4.00866	3.52545	2.61799	2.8311	3.07747	4.49022	3.29658	2.60735	1.63066	1.01844	3.98868	3.76734	3.22288	1.98062	2.25781	2.38535	4.18604	2.48434	2.40384	3.09725	3.58208	3.63191	1.44789	2.78415	2.75549	2.68697	2.79357	3.19006	1.79252	2.97192	2.74854	1.65005	3.0064	3.88195	2.25607	4.41817	4.69048	2.89251	4.36986	3.24162	4.7478	2.68129	1.45241	3.03128
Cell_0144	AMPKARt2	Insulin 10000 ng/ml	0.558705	0.456794	0.596998	0.549582	0.469106	0.615141	0.463202	0.493497	0.455685	0.452232	0.465297	0.39635	0.348872	0.298807	0.549355	0.447133	0.506815	0.399998	0.286903	0.477419	0.573252	0.61226	0.51363	0.551236	0.294944	0.26433	0.413433	0.721481	0.336834	0.398845	0.662528	0.342528	0.5458	0.507192	0.476409	0.670881	0.576499	0.459122	0.496902	0.658882	0.509895	0.347793	0.488391	0.475096	0.380715	0.528541	0.239712
Cell_0145	TFEB_TR	Insulin 10000 ng/ml	2.13804	1.81384	0.564011	1.08084	1.31214	0.592425	1.42748	1.61953	1.86828	2.45287	1.0163	1.32548	1.29112	1.87371	1.30109	2.65787	1.0222	1.12179	1.64893	2.28077	1.74391	1.02887	2.51163	0.997347	2.58664	1.40085	1.68532	2.97667	1.07105	2.18598	0.634946	0.712235	1.67108	0.829779	1.30045	1.05334	1.58382	1.42145	2.44264	1.16191	0.71406	1.7908	1.75845	1.6711	2.36338	0.900247	2.11057
Cell_0145	FOXO_TR	Insulin 10000 ng/ml	3.54938	3.56231	2.95817	3.95022	3.58455	2.8762	2.98083	3.40312	4.71002	3.36512	2.82016	1.68854	1.14252	4.11127	4.07765	3.511	1.8561	2.17844	2.32744	3.95698	2.67257	2.33381	3.04772	3.44369	3.38086	1.53136	2.47091	2.51781	2.59086	2.88735	3.07337	1.87703	3.04774	2.89706	2.02752	3.00401	3.75303	2.24246	4.21978	4.79958	3.48194	4.49404	3.24256	4.60399	2.7842	1.41651	2.93547
Cell_0145	AMPKARt2	Insulin 10000 ng/ml	0.560599	0.470344	0.59579	0.519461	0.464645	0.6061	0.468277	0.490447	0.499953	0.445669	0.518781	0.404095	0.374009	0.304194	0.548374	0.450568	0.51707	0.415723	0.266461	0.481835	0.549914	0.628199	0.532693	0.548782	0.285492	0.294	0.418897	0.71832	0.302276	0.424784	0.666751	0.322504	0.546886	0.441477	0.46432	0.683047	0.563144	0.446383	0.499913	0.664625	0.516413	0.403792	0.48529	0.441624	0.37316	0.516796	0.2676
Cell_0146	TFEB_TR	Insulin 10000 ng/ml	1.8112	2.07881	0.54205	1.15177	1.37235	0.718344	1.40041	1.70397	1.87317	2.28895	1.21216	1.33466	1.17237	1.98751	1.4186	2.30211	0.983682	1.15306	1.69961	2.35549	1.57619	0.912808	2.76653	0.937548	2.8806	1.25877	1.64042	2.70589	1.03754	1.76951	0.567684	0.778325	1.68653	0.842952	1.33777	1.1663	1.96587	1.45586	2.13393	1.60078	0.929538	2.43058	1.77678	1.67215	2.98435	0.870438	1.80266
Cell_0146	FOXO_TR	Insulin 10000 ng/ml	3.55328	3.54615	2.71983	3.99722	3.67628	3.47057	2.96381	3.06367	5.03938	3.36958	2.81133	1.67042	1.17458	3.99288	3.92871	3.32743	1.61554	2.16543	2.30777	3.74086	2.77208	2.3592	3.05639	3.50637	3.51122	1.56154	2.33081	2.53693	2.39716	2.98952	3.27459	1.8458	3.16379	2.48149	2.2056	3.00801	3.71072	2.12003	4.54649	4.74198	3.64767	5.04147	3.319	4.46689	2.72446	1.47363	3.16184
Cell_0146	AMPKARt2	Insulin 10000 ng/ml	0.569626	0.472192	0.594257	0.506251	0.464648	0.574038	0.466559	0.463461	0.51671	0.431465	0.488599	0.407275	0.375456	0.304955	0.532238	0.431899	0.529231	0.4322	0.318496	0.472183	0.51132	0.617866	0.535245	0.548597	0.25508	0.305507	0.415422	0.68674	0.30637	0.445774	0.666757	0.339551	0.547217	0.415486	0.463456	0.648575	0.56508	0.387208	0.450475	0.671486	0.509193	0.411732	0.46756	0.44797	0.380339	0.521518	0.260614
Cell_0147	TFEB_TR	Insulin 10000 ng/ml	2.17727	1.9254	1.67207	1.23609	1.44586	0.709944	1.39939	1.69422	1.97736	2.49348	1.54442	1.28434	1.71637	2.15948	1.43728	1.84362	0.858087	1.12506	1.64176	2.41443	1.64534	1.03856	2.8528	0.908328	2.13284	1.17365	1.62196	2.03602	0.947835	1.76054	0.644189	0.67446	1.59722	0.869332	1.25293	1.02628	2.01958	1.43548	2.71039	1.01421	1.30225	2.62141	2.07825	1.66308	2.36195	0.920654	2.2292
Cell_0147	FOXO_TR	Insulin 10000 ng/ml	3.47005	3.5488	4.18244	3.86761	3.62176	2.88245	2.99158	2.79065	4.57235	3.36038	3.12467	1.74509	1.21212	4.36728	3.66232	3.16776	1.32887	2.14698	2.20036	3.94064	2.96369	2.50237	3.07556	3.61794	3.35114	1.47439	2.38066	2.39189	2.44345	2.80317	3.15678	1.75964	2.94558	2.40312	2.10786	3.22593	3.78549	2.06513	4.65194	4.49723	2.97547	5.57323	3.35991	4.5754	2.71692	1.41025	3.21769
Cell_0147	AMPKARt2	Insulin 10000 ng/ml	0.553494	0.488379	0.672016	0.48324	0.454249	0.605057	0.464455	0.46991	0.523611	0.427602	0.479331	0.41905	0.362498	0.316043	0.529146	0.434213	0.551412	0.442709	0.300437	0.485014	0.50583	0.600457	0.541739	0.56058	0.260053	0.372132	0.409713	0.660551	0.29764	0.43209	0.647134	0.370799	0.544321	0.374646	0.45038	0.664425	0.547688	0.374951	0.515286	0.687546	0.484605	0.443537	0.48605	0.505224	0.434492	0.532577	0.261584
Cell_0148	TFEB_TR	Insulin 10000 ng/ml	2.02818	1.89405	1.20415	1.28674	1.51571	0.748072	1.42276	1.42291	1.91508	2.4998	1.75957	1.25341	1.47995	2.15233	1.52191	1.79693	0.910073	1.16802	2.06477	2.07261	1.91957	0.766482	2.78231	0.89492	2.21012	1.09846	1.65924	2.44766	0.924604	1.50919	0.597797	0.84997	1.54653	0.952589	1.53744	1.31658	2.04421	1.481	1.89556	1.2951	1.16554	1.68554	1.95297	1.67028	2.6964	0.735885	2.55007
Cell_0148	FOXO_TR	Insulin 10000 ng/ml	3.44679	3.42572	3.97428	3.824	3.74011	2.80961	2.96207	2.6158	4.2871	3.26962	3.44203	1.40172	1.24125	3.95949	3.80791	3.19774	1.57803	2.18225	2.30604	3.73701	2.72316	2.40065	3.2642	3.70305	3.17955	1.55449	2.34112	2.46355	2.36015	2.49832	3.20531	1.859	3.03888	2.37627	2.60053	3.12046	3.9884	1.97588	4.70803	4.52533	3.02596	5.63297	3.24687	4.45348	2.75024	1.27205	3.33759
Cell_0148	AMPKARt2	Insulin 10000 ng/ml	0.55825	0.498095	0.667262	0.460181	0.433462	0.627904	0.458569	0.465466	0.54377	0.408505	0.468434	0.403819	0.370808	0.317569	0.525895	0.434441	0.542066	0.425992	0.307076	0.485715	0.520296	0.590774	0.529139	0.529985	0.271932	0.550968	0.513403	0.642618	0.30333	0.407069	0.658023	0.494371	0.55014	0.381707	0.446229	0.638835	0.524079	0.381415	0.522735	0.675961	0.519828	0.449015	0.495897	0.520867	0.451228	0.530116	0.247305
Cell_0149	TFEB_TR	Insulin 10000 ng/ml	1.69718	1.99247	1.22656	1.30611	1.55657	0.802234	1.43459	0.839348	2.03274	2.45539	1.74038	1.24371	1.25419	2.26953	1.46958	2.05842	0.948469	1.15962	1.94486	2.15297	1.23538	1.16314	2.77625	0.962087	2.34896	1.16676	1.58431	2.55388	1.27271	1.51476	0.686043	0.598185	1.59556	0.992521	1.44372	1.32199	1.91856	1.41037	2.12852	1.63244	1.02883	1.53206	1.73599	1.61679	2.57973	0.89387	2.01213
Cell_0149	FOXO_TR	Insulin 10000 ng/ml	3.31127	3.49431	3.9147	3.77543	3.65177	3.27198	3.04916	2.78465	4.42015	3.43044	3.73258	1.24897	1.19193	4.23621	3.51895	3.30738	1.61069	2.16923	2.20724	4.06364	2.50859	2.35766	3.25943	3.93031	3.24093	1.61095	2.45218	2.52185	2.25032	2.5245	3.31136	2.11483	2.93855	2.25957	2.64379	2.90699	4.06927	1.94627	4.72122	4.64151	3.07644	5.36446	3.19171	4.24518	2.76362	1.33223	3.4033
Cell_0149	AMPKARt2	Insulin 10000 ng/ml	0.54118	0.480463	0.655451	0.469003	0.440889	0.640332	0.455812	0.575696	0.538432	0.449683	0.414228	0.426173	0.383843	0.32333	0.516193	0.401402	0.529583	0.42521	0.301728	0.486518	0.522338	0.579644	0.521568	0.538418	0.271333	0.543468	0.616761	0.629183	0.281382	0.429764	0.67082	0.539951	0.533619	0.390128	0.479587	0.659175	0.492315	0.330376	0.526285	0.669037	0.555051	0.435823	0.506943	0.531432	0.477428	0.532368	0.264627
Cell_0150	TFEB_TR	Insulin 10000 ng/ml	1.92688	1.59723	1.17064	1.35845	1.5938	0.626844	1.4941	1.07642	2.06987	2.40643	1.79741	1.27521	1.23749	2.31723	1.56675	1.63848	0.994494	1.165	1.77069	2.00756	1.29738	1.50972	2.90837	0.96937	2.00728	1.09983	1.46044	2.97951	1.15337	1.64056	0.640021	0.81002	1.69898	1.03317	1.58755	1.07461	2.71561	1.34535	2.19584	1.2454	2.08545	2.88344	1.92767	1.71748	2.2749	0.881241	2.00762
Cell_0150	FOXO_TR	Insulin 10000 ng/ml	3.18209	3.38773	3.78014	3.86698	3.74395	2.49229	3.08473	2.79967	4.47237	3.44357	3.7303	1.20171	1.17682	4.15997	3.77256	2.74938	1.68497	2.2198	2.23076	3.5603	3.19582	2.33807	3.19045	3.86148	2.9637	1.53654	2.58993	2.98466	2.52357	2.58166	3.45166	1.97983	2.8837	2.36977	2.85275	2.6775	3.85998	1.986	4.73896	4.67364	3.34583	5.10108	3.29282	4.27545	2.77401	1.40055	3.48586
Cell_0150	AMPKARt2	Insulin 10000 ng/ml	0.515794	0.476008	0.662309	0.483033	0.446179	0.64034	0.44627	0.596426	0.545889	0.498644	0.408163	0.428832	0.385844	0.333952	0.51447	0.38346	0.524575	0.414342	0.275935	0.480423	0.500856	0.569751	0.505798	0.516861	0.258003	0.52548	0.603201	0.613105	0.305076	0.441762	0.661724	0.575625	0.517221	0.399542	0.46601	0.670225	0.460154	0.361645	0.543985	0.660544	0.444834	0.469552	0.537294	0.533047	0.47792	0.490008	0.233685
Cell_0151	TFEB_TR	Insulin 10000 ng/ml	2.16467	1.50337	1.28044	1.33674	1.60481	0.731192	1.52052	0.867595	2.4196	2.1583	1.70629	1.29291	1.48523	2.17672	1.56512	1.54433	0.962066	1.21551	1.95294	2.09761	1.30615	1.51865	2.97198	1.03682	1.67893	1.09259	1.26952	3.7594	1.06442	2.00052	0.723403	0.5601	1.44066	1.08766	1.99326	1.05062	1.86857	1.38814	2.14684	1.39682	0.981578	2.42202	1.68409	1.81818	2.43412	0.737414	2.05472
Cell_0151	FOXO_TR	Insulin 10000 ng/ml	3.14441	3.52349	3.84622	3.82415	3.69811	2.58688	3.1067	3.12021	4.61539	3.43053	3.73638	1.42508	1.18158	3.43702	3.8427	2.55307	2.05408	2.30988	2.23538	3.6137	3.25515	2.44975	3.24369	4.0001	3.00788	1.47389	2.60052	3.12235	2.73005	2.83558	3.42246	1.95618	2.81671	2.6029	2.97219	2.58312	3.91734	1.935	4.93957	4.72171	3.53937	5.32203	3.33506	4.30571	2.85654	1.26873	3.52819
Cell_0151	AMPKARt2	Insulin 10000 ng/ml	0.530947	0.464746	0.670474	0.506909	0.427041	0.67088	0.433475	0.615888	0.541514	0.512303	0.362555	0.395645	0.605783	0.357158	0.521638	0.366547	0.492627	0.406179	0.265321	0.49046	0.47981	0.559102	0.515388	0.512393	0.277096	0.534174	0.610174	0.607284	0.291078	0.413332	0.66129	0.549065	0.503046	0.396673	0.42256	0.661544	0.442179	0.394429	0.567409	0.641086	0.568345	0.478481	0.54641	0.534661	0.458557	0.482613	0.220722
Cell_0152	TFEB_TR	Insulin 10000 ng/ml	1.9514	1.78311	1.21823	1.3107	1.61635	0.671607	1.51697	0.833533	1.69324	2.30048	2.31	1.32896	1.365	2.08473	1.5132	1.44274	1.09222	1.27122	1.36421	2.06091	1.39453	2.22793	2.9129	1.07264	1.88601	1.12881	1.19699	5.61471	1.08641	1.73831	0.642802	0.595251	1.64933	1.04765	1.94971	1.0286	2.65603	1.38233	2.08974	2.04676	1.62675	2.00942	1.61326	1.38096	2.56575	0.920482	2.5731
Cell_0152	FOXO_TR	Insulin 10000 ng/ml	3.14856	3.3963	3.89818	3.7224	3.64987	2.3678	3.07048	3.17762	4.71578	3.6515	3.90716	1.34927	1.11577	3.09334	3.84668	2.49187	2.01279	2.36946	2.1556	3.95032	3.152	2.48079	3.16388	3.99776	3.08345	1.89482	2.80595	3.24026	2.5113	2.57372	3.70695	1.95844	2.89892	2.63658	3.18203	2.688	4.02016	2.05606	4.5511	4.78676	2.64952	5.56787	3.31911	4.50597	2.69443	1.42034	3.92206
Cell_0152	AMPKARt2	Insulin 10000 ng/ml	0.535854	0.426089	0.67303	0.509506	0.4497	0.639279	0.444106	0.581465	0.509421	0.524065	0.411021	0.390445	0.614412	0.367225	0.516056	0.381048	0.505404	0.39655	0.271511	0.496879	0.450431	0.570701	0.509641	0.505655	0.309799	0.401182	0.612828	0.587312	0.318556	0.413618	0.643245	0.556105	0.491332	0.40603	0.397897	0.648238	0.430531	0.368645	0.586751	0.6252	0.484687	0.442915	0.558151	0.466616	0.444703	0.378449	0.240994
Cell_0153	TFEB_TR	Insulin 10000 ng/ml	2.03359	1.59854	1.29771	1.27297	1.62378	0.66066	1.58022	0.864751	2.88588	2.205	2.31339	1.34226	1.27266	2.30425	1.53685	1.4471	1.11655	1.65888	2.59481	1.95819	1.64437	1.31527	3.14654	1.12185	1.86981	1.37174	1.11733	4.09194	1.04538	1.81019	0.997498	0.886806	1.60139	1.05687	2.51388	1.02616	2.42638	1.31827	1.95676	2.08111	1.05912	2.2036	1.77348	1.98713	2.47099	0.957811	3.06993
Cell_0153	FOXO_TR	Insulin 10000 ng/ml	3.14161	3.17556	3.75136	3.74673	3.69817	2.17892	3.06887	3.17628	4.80384	3.36223	3.55434	1.24624	1.09614	3.57682	3.64566	2.29003	2.37637	1.54643	2.16887	3.53223	2.91291	2.43667	3.24747	4.05152	3.09802	1.6661	2.87601	3.28615	2.57113	2.88625	4.10597	2.00224	2.97978	2.6472	3.46025	2.7567	4.03009	1.937	4.60852	4.75272	3.44914	5.4038	3.44745	4.91388	2.69937	1.50253	3.97201
Cell_0153	AMPKARt2	Insulin 10000 ng/ml	0.504589	0.422303	0.654769	0.524225	0.451136	0.623217	0.426633	0.589393	0.483276	0.494998	0.401068	0.411903	0.624938	0.377036	0.529012	0.386605	0.497138	0.531075	0.274974	0.496653	0.496292	0.554807	0.494616	0.488348	0.384965	0.349843	0.624788	0.561553	0.372568	0.385442	0.672959	0.546518	0.467002	0.465237	0.4327	0.67206	0.423371	0.375795	0.569488	0.653143	0.566488	0.428004	0.547253	0.491816	0.446153	0.374843	0.257684
Cell_0154	TFEB_TR	Insulin 10000 ng/ml	2.43862	1.60977	1.30483	1.30902	1.54644	0.756997	1.49969	0.949902	1.66538	2.16659	1.79105	1.33296	1.2662	2.38946	1.45337	1.03788	1.12161	1.59751	2.71927	1.86841	1.20803	1.65019	3.12938	1.08843	1.79261	1.11979	1.04687	7.47583	1.04894	1.62263	0.873398	0.720459	1.59297	0.926242	2.55775	1.1451	2.01832	1.47385	1.68245	1.85278	1.24267	2.77865	1.48622	1.69308	2.58121	1.03924	3.25996
Cell_0154	FOXO_TR	Insulin 10000 ng/ml	3.12477	3.07917	3.71263	3.82167	3.69552	2.77924	3.07316	3.11555	5.01283	3.30016	3.53395	1.20076	1.11189	3.54486	3.34303	2.19477	1.84859	1.59603	2.08557	3.49941	2.92994	2.53415	3.28863	4.08981	2.99695	1.67579	2.94692	3.64347	2.41933	2.76321	3.83106	2.07131	2.78113	2.52918	3.72938	2.88947	3.77251	1.99864	4.68969	4.69688	3.43662	6.26542	3.37192	4.76674	2.64558	1.25832	4.12553
Cell_0154	AMPKARt2	Insulin 10000 ng/ml	0.501499	0.406011	0.662727	0.511651	0.481801	0.581786	0.434043	0.562733	0.440547	0.466108	0.410311	0.409395	0.605445	0.389822	0.55379	0.350552	0.505922	0.532517	0.276772	0.483622	0.53604	0.563764	0.485971	0.480475	0.425336	0.329694	0.629121	0.540369	0.433714	0.392739	0.575252	0.548413	0.466183	0.534843	0.466154	0.669853	0.402321	0.360351	0.58456	0.644753	0.550826	0.492546	0.504678	0.46827	0.426054	0.378411	0.228696
Cell_0155	TFEB_TR	Insulin 10000 ng/ml	2.84348	1.59528	1.29015	1.26944	1.48677	0.78514	1.51207	1.07409	3.26879	2.22863	1.55394	1.27831	1.19473	2.09569	1.40055	1.30349	1.061	1.54401	2.22612	1.78722	1.45114	3.79067	0.478355	1.13119	1.72013	1.15357	1.11041	5.12811	1.01172	1.70226	1.07472	0.913494	1.55573	0.909374	2.287	0.874587	1.78822	1.4745	1.96159	1.21003	1.34762	2.53525	1.66136	2.03175	2.31728	1.14316	2.95468
Cell_0155	FOXO_TR	Insulin 10000 ng/ml	3.09249	3.03101	3.69422	3.61913	3.62254	2.93491	3.05653	3.15581	5.02035	3.24648	3.36958	1.11206	1.04439	3.42801	3.41146	2.2839	2.09099	1.54459	2.18915	3.27156	3.18538	2.53915	1.26645	3.66008	2.8062	1.83383	3.37052	3.53367	2.55088	2.63082	3.8298	1.94695	2.78081	2.87336	3.79108	3.28362	3.67363	1.96686	4.79412	4.69323	3.33825	5.55287	3.68907	4.97698	2.57376	1.30734	3.99751
Cell_0155	AMPKARt2	Insulin 10000 ng/ml	0.523024	0.39406	0.680098	0.506542	0.490586	0.550389	0.446557	0.575153	0.426493	0.439939	0.399235	0.389756	0.642713	0.379987	0.567742	0.357063	0.483894	0.522727	0.259526	0.47777	0.514438	0.539457	0.641298	0.477816	0.431938	0.30674	0.61703	0.519409	0.483124	0.377508	0.486896	0.496572	0.466352	0.552956	0.44822	0.68735	0.391885	0.379527	0.56258	0.645109	0.538159	0.468364	0.522351	0.474069	0.410784	0.403952	0.239514
Cell_0156	TFEB_TR	Insulin 10000 ng/ml	2.5517	1.5442	1.0474	1.22727	1.39383	0.903484	1.48886	0.679167	2.2837	2.42427	1.62447	1.26938	1.27515	2.30891	1.25732	0.983125	1.02692	1.52431	1.48291	1.78807	1.18188	1.08861	0.468518	1.20064	1.79693	1.33382	1.04684	4.24491	0.868435	2.03165	1.18254	1.08464	1.42504	0.856392	2.93189	1.27003	2.06193	1.54943	1.99663	4.312	1.43999	2.7451	1.81291	1.96615	3.52393	1.07757	2.19863
Cell_0156	FOXO_TR	Insulin 10000 ng/ml	3.36951	2.9477	3.73625	3.50122	3.54153	3.44559	2.92742	3.15297	4.67502	3.28042	3.68021	0.983556	1.21454	3.43344	3.39344	2.15222	2.09873	1.5682	2.04102	3.13322	3.38418	2.60714	1.27143	3.60282	2.81193	2.1849	3.39388	3.28314	2.2997	2.90013	3.7377	2.22837	2.62415	2.7709	4.13397	3.93689	3.62686	1.85867	4.80702	4.75975	2.91324	5.48293	3.57705	4.73674	2.61072	1.25242	4.14341
Cell_0156	AMPKARt2	Insulin 10000 ng/ml	0.530849	0.3825	0.652969	0.517843	0.49292	0.518514	0.428672	0.569673	0.426907	0.423992	0.404029	0.39975	0.615541	0.36291	0.563089	0.353237	0.494408	0.544264	0.241207	0.480496	0.478621	0.561712	0.640077	0.489961	0.445906	0.234006	0.628768	0.568578	0.447736	0.39385	0.425836	0.493186	0.480166	0.53078	0.451198	0.630009	0.405791	0.360865	0.574289	0.646889	0.50804	0.454516	0.490134	0.46485	0.398609	0.456196	0.243122
Cell_0157	TFEB_TR	Insulin 10000 ng/ml	2.5972	1.31684	1.28543	1.26237	1.34875	0.870548	1.45903	2.43257	3.65964	2.49301	1.95416	1.26641	1.28208	2.07553	1.22356	0.924964	1.00025	1.50826	1.94261	1.728	1.62183	2.26288	0.461489	1.19217	1.73847	1.18727	1.09495	1.37278	0.833025	1.92535	1.15043	1.02412	1.70211	0.891314	2.52609	1.39839	1.73196	1.46889	1.7049	1.36929	1.29388	3.12038	2.03462	1.98797	3.28863	1.14819	3.50454
Cell_0157	FOXO_TR	Insulin 10000 ng/ml	3.2515	3.05835	3.81075	3.54433	3.59541	3.1885	2.88418	3.00413	4.93953	3.3002	3.36391	0.90642	1.24935	3.05583	3.8554	2.06437	2.28782	1.50776	2.00112	3.02684	3.1501	2.3712	1.37054	3.50517	2.67945	2.5214	3.32004	0.802697	2.3535	2.80136	3.77723	2.39559	2.8204	2.7967	4.07581	4.03784	3.7519	1.91889	4.86364	5.07586	2.72716	5.91364	3.58267	4.73331	2.63498	1.31927	3.97056
Cell_0157	AMPKARt2	Insulin 10000 ng/ml	0.520651	0.401773	0.651358	0.500774	0.494413	0.490468	0.434196	0.589486	0.425062	0.430119	0.429986	0.404392	0.598581	0.3455	0.559486	0.345616	0.510357	0.511841	0.240884	0.485507	0.475294	0.56	0.636039	0.486803	0.451532	0.256974	0.624961	0.521573	0.404419	0.37391	0.39289	0.424013	0.502586	0.518834	0.436222	0.586891	0.397162	0.357166	0.572312	0.641384	0.541836	0.506731	0.486437	0.43109	0.401383	0.544535	0.243348
Cell_0158	TFEB_TR	Insulin 10000 ng/ml	2.1031	1.71396	1.43778	1.27487	1.29738	0.940607	1.39228	0.343624	2.92097	2.56799	1.69798	1.25172	1.21222	2.27178	1.15249	1.19341	1.01197	1.51658	1.74084	1.75162	1.46569	1.78914	0.45219	1.12941	1.49115	1.18225	1.1195	1.26136	0.795069	1.91639	0.978735	1.19566	1.5972	0.970163	3.05313	1.49556	2.16375	1.69134	2.88139	1.90689	1.31807	4.77746	1.71099	2.24578	4.65325	1.12361	2.56173
Cell_0158	FOXO_TR	Insulin 10000 ng/ml	3.10571	2.81345	3.9968	3.73227	3.53655	3.49302	2.84527	2.8685	4.72713	3.42592	3.42665	1.18676	1.19425	3.34134	3.67496	2.07707	2.25634	1.51139	1.96845	3.02151	2.83043	2.34848	1.32581	3.14051	2.67936	2.31688	3.57027	0.73769	2.45413	2.7879	3.74371	2.32126	2.81236	2.79864	4.13626	3.92955	3.82158	1.8773	4.87637	5.16479	2.99817	5.97773	3.38778	5.19706	2.46814	1.52688	3.93868
Cell_0158	AMPKARt2	Insulin 10000 ng/ml	0.522232	0.369765	0.643381	0.476476	0.472169	0.478623	0.447252	0.586973	0.418759	0.434461	0.43866	0.421099	0.59841	0.339873	0.565766	0.329314	0.523007	0.525955	0.253928	0.485075	0.42	0.580845	0.613625	0.515481	0.435784	0.275871	0.555296	0.508608	0.400589	0.378704	0.404587	0.395128	0.499797	0.508887	0.450253	0.522694	0.390515	0.342166	0.56942	0.639666	0.511598	0.500395	0.47482	0.44313	0.390821	0.504212	0.240276
Cell_0159	TFEB_TR	Insulin 10000 ng/ml	1.74752	1.56795	1.47615	1.28544	1.42207	0.999208	1.35599	1.18806	3.27141	2.4899	1.78902	1.33843	1.2413	2.4853	1.13701	1.35319	0.960578	1.50525	1.2816	1.72374	1.30418	1.06948	0.45016	1.11229	1.66355	1.06196	1.22752	1.28966	0.836968	2.09197	1.33302	0.979211	0.973015	1.03668	2.8606	1.9887	2.38965	1.78523	2.04346	2.41637	1.68819	2.99142	1.47902	2.33953	3.27897	1.25901	4.59794
Cell_0159	FOXO_TR	Insulin 10000 ng/ml	3.08778	2.68559	3.75114	3.61861	3.66462	3.83213	2.77352	2.95624	4.75524	3.2166	3.38215	1.37294	1.20485	3.57179	3.49515	1.9493	2.34027	1.48512	1.96082	2.92563	2.49739	2.3261	1.36233	3.26166	2.40715	2.08315	3.73646	0.777095	2.49968	2.94944	3.72287	2.22612	2.86723	2.71112	4.0279	3.66407	3.77701	1.96287	5.14568	5.1085	2.71828	5.34435	3.42738	4.98027	2.384	1.60836	3.86212
Cell_0159	AMPKARt2	Insulin 10000 ng/ml	0.515126	0.344497	0.637315	0.474121	0.456208	0.472804	0.449588	0.602444	0.419394	0.460117	0.440693	0.437654	0.603498	0.351462	0.557422	0.348352	0.535538	0.534352	0.242935	0.479597	0.419584	0.568325	0.620228	0.537366	0.4156	0.29829	0.566701	0.520294	0.376104	0.364373	0.374632	0.376881	0.583147	0.483046	0.40277	0.546008	0.395077	0.345682	0.576609	0.631536	0.448546	0.46393	0.460286	0.390958	0.400705	0.457785	0.290189
Cell_0160	TFEB_TR	Insulin 10000 ng/ml	1.76212	1.37246	1.49365	1.38816	1.47272	1.02797	1.27735	3.41717	2.76884	2.29571	2.12992	1.28642	1.2179	2.27452	1.20071	1.20293	0.960306	1.53214	1.54936	1.7371	1.16528	1.77668	0.459217	1.05565	1.60041	0.952178	1.25972	1.40599	0.82655	1.93481	1.09436	0.99049	1.04948	1.14226	2.84522	1.7398	2.15919	1.77691	3.54255	1.82195	1.66247	4.33796	1.89676	2.28698	2.19563	1.2712	3.85023
Cell_0160	FOXO_TR	Insulin 10000 ng/ml	3.12791	2.94277	3.85958	3.72599	3.66692	3.91421	2.65635	2.57149	4.76061	3.27843	3.61265	0.993628	1.19366	3.7835	3.69673	2.15888	2.02876	1.47333	2.10347	2.75301	2.62048	2.41183	1.39588	3.09521	2.62644	1.66337	3.61318	0.817056	2.3609	2.98396	3.42908	2.26436	3.34607	3.15023	3.96479	3.56733	3.94397	1.97774	4.94148	5.03179	2.47323	5.38937	3.43618	4.62159	2.34314	1.58881	3.42956
Cell_0160	AMPKARt2	Insulin 10000 ng/ml	0.530408	0.383094	0.640201	0.46191	0.443462	0.47027	0.4445	0.561076	0.403131	0.474724	0.434205	0.441188	0.60043	0.359127	0.562998	0.358219	0.540374	0.539425	0.230549	0.4793	0.41533	0.584026	0.59907	0.531881	0.394372	0.295074	0.552134	0.511017	0.370019	0.3752	0.390502	0.347279	0.575064	0.483899	0.445727	0.557135	0.432466	0.345206	0.596224	0.615061	0.375073	0.479355	0.442133	0.391114	0.417434	0.38967	0.256945
Cell_0161	TFEB_TR	Insulin 10000 ng/ml	2.1755	1.57857	1.3663	1.43223	1.51597	1.03276	1.25907	2.07923	2.97981	2.25188	2.37187	1.32407	1.21956	2.41115	1.23346	1.47501	0.926603	1.54127	1.45482	1.70324	1.61993	2.67707	0.458303	0.998682	1.91135	1.07444	1.31373	1.35897	0.924816	1.97858	1.61528	0.984421	1.15804	1.13944	2.88602	1.76873	2.28133	5.09411	2.78301	1.94198	1.62076	2.20456	1.45545	2.43428	2.1978	1.48579	4.33666
Cell_0161	FOXO_TR	Insulin 10000 ng/ml	3.18664	2.85037	3.77006	3.61424	3.54883	3.56721	2.67566	2.60828	4.37357	3.11213	3.5968	1.23805	1.18874	3.52225	3.77606	2.21583	2.18604	1.46723	2.24825	2.63537	3.12095	2.39641	1.42574	2.91986	2.70919	1.54863	3.68339	0.786749	2.36012	3.05803	3.47637	2.29926	3.60667	3.06764	4.24617	3.49016	4.05226	2.52969	5.23367	4.85197	2.36647	4.75051	3.58305	5.09338	2.28628	1.64391	3.65026
Cell_0161	AMPKARt2	Insulin 10000 ng/ml	0.527751	0.381866	0.64453	0.434844	0.421342	0.456479	0.4446	0.598251	0.431828	0.493443	0.437591	0.430601	0.591794	0.333167	0.561135	0.352851	0.553125	0.52559	0.235515	0.473769	0.400618	0.577158	0.591596	0.544314	0.353647	0.278121	0.557994	0.526007	0.36941	0.371096	0.398187	0.300019	0.51308	0.505204	0.432437	0.577628	0.534192	0.615399	0.59451	0.583331	0.350763	0.421188	0.460216	0.396784	0.464422	0.358516	0.252404
Cell_0162	TFEB_TR	Insulin 10000 ng/ml	1.74792	1.63491	1.47987	1.43141	1.53689	1.07322	1.22962	3.2031	2.75008	2.39702	2.27956	1.32338	1.17773	2.16151	1.28864	1.43972	0.915596	1.55974	2.45254	1.76429	1.69785	1.70013	0.479446	0.971874	1.8072	1.05563	1.38904	1.38507	1.03301	2.02236	1.35137	1.14378	1.47793	1.13706	3.74251	1.82032	1.57836	5.133	2.48641	1.59733	1.66133	3.21276	1.6033	2.50011	2.72379	1.30474	3.41391
Cell_0162	FOXO_TR	Insulin 10000 ng/ml	3.00342	2.70726	3.77912	3.62345	3.57319	3.39752	2.68122	2.3904	4.67431	3.15556	3.53637	1.18612	1.16706	3.15729	3.82889	2.15187	2.05781	1.44211	2.28917	2.71592	2.98628	2.39142	1.45847	2.88401	2.48036	1.5793	3.47462	0.795041	2.5219	3.13209	3.41109	2.20717	3.73684	3.00832	3.97469	3.44544	3.71492	2.68136	4.93116	4.63265	2.11853	5.07507	3.56644	5.00585	2.41316	1.56615	3.68998
Cell_0162	AMPKARt2	Insulin 10000 ng/ml	0.547286	0.385223	0.654656	0.447024	0.434113	0.467831	0.452172	0.541729	0.45437	0.509271	0.424891	0.422111	0.683059	0.321699	0.558751	0.354506	0.55181	0.532689	0.227757	0.4673	0.401936	0.596592	0.593845	0.545097	0.330831	0.283626	0.519632	0.510247	0.367637	0.366992	0.423142	0.262225	0.500155	0.512003	0.42326	0.575539	0.59377	0.583911	0.615107	0.576993	0.371103	0.512227	0.447515	0.388611	0.449308	0.373601	0.288658
Cell_0163	TFEB_TR	Insulin 10000 ng/ml	1.8836	1.5445	1.67473	1.48383	1.52361	1.02342	1.18192	1.45568	2.55712	2.23657	2.09414	1.4313	1.16322	2.323	1.25357	1.59817	0.949093	1.54891	1.67221	1.91649	1.532	1.51277	0.482169	0.987392	2.1591	0.999982	1.40919	1.28335	0.9773	2.13625	1.20555	0.89904	1.59089	1.19267	2.76424	2.01032	1.93893	6.0837	2.31303	2.52303	1.78817	3.40126	1.21296	2.56594	1.87195	1.30879	3.78684
Cell_0163	FOXO_TR	Insulin 10000 ng/ml	3.07921	2.5736	3.94078	3.56355	3.56789	3.28882	2.56616	2.28624	4.45321	3.15071	3.55747	1.35403	1.1806	3.23934	3.46262	2.27539	2.24645	1.43084	2.15489	3.23798	2.89408	2.32226	1.48741	2.87957	2.70597	1.65955	3.21182	0.736486	2.5046	2.74174	3.27674	2.23169	3.12124	3.18577	4.01175	3.53518	3.8756	2.68566	4.92537	4.61701	2.39878	5.08631	1.20285	4.91832	2.29313	1.65784	3.70746
Cell_0163	AMPKARt2	Insulin 10000 ng/ml	0.518953	0.381933	0.65309	0.437076	0.452585	0.554799	0.463933	0.5694	0.511327	0.490943	0.410045	0.41592	0.622663	0.335045	0.558254	0.367898	0.537248	0.523692	0.2355	0.48016	0.421712	0.604137	0.587194	0.533941	0.315811	0.290431	0.509521	0.508379	0.344189	0.410821	0.457285	0.233547	0.511265	0.499376	0.424524	0.581636	0.596568	0.593106	0.609722	0.531587	0.349133	0.482697	0.67336	0.380437	0.462114	0.326787	0.253935
Cell_0164	TFEB_TR	Insulin 10000 ng/ml	3.7143	1.50714	1.37103	1.56804	1.42763	0.913401	1.13423	1.93329	2.52883	2.3714	2.67502	1.50798	1.17811	2.69719	1.30315	1.04731	1.02262	1.56485	1.37263	2.0198	1.35349	0.973178	0.473976	1.00365	1.81716	1.23392	1.29059	1.19119	1.1611	2.01845	1.22562	1.1535	1.80035	1.11793	2.79889	1.90904	1.67794	7.31875	2.8883	1.33274	1.74797	3.58976	1.10121	2.64612	2.53234	1.59778	2.89282
Cell_0164	FOXO_TR	Insulin 10000 ng/ml	3.13161	2.59568	3.93328	3.66344	3.5768	3.0661	2.54116	2.39555	4.38008	3.3088	3.38258	1.47046	1.226	3.51902	3.68521	2.1879	2.3551	1.40408	2.1959	3.10942	2.74282	2.41124	1.52144	3.05236	2.80824	1.92158	2.99144	0.830117	2.77838	2.76065	3.02181	2.10086	3.10606	2.79516	3.94131	3.64108	3.69132	2.79425	4.91479	4.52018	2.5797	5.09755	1.2173	4.79002	2.47179	1.66855	3.77044
Cell_0164	AMPKARt2	Insulin 10000 ng/ml	0.536662	0.39865	0.630438	0.41644	0.499287	0.590274	0.452679	0.54904	0.563364	0.490195	0.471162	0.412754	0.617772	0.30664	0.553587	0.357915	0.553139	0.519626	0.218403	0.461032	0.363492	0.599687	0.595824	0.540126	0.315381	0.284119	0.476009	0.525263	0.322895	0.425934	0.478873	0.276941	0.512779	0.503228	0.437016	0.528781	0.609782	0.618767	0.624192	0.501536	0.330807	0.453167	0.674435	0.413554	0.468526	0.317076	0.264403
Cell_0165	TFEB_TR	Insulin 10000 ng/ml	1.99444	1.46903	1.438	1.53462	1.32797	0.773453	1.09404	2.86159	2.27582	2.28723	2.4864	1.49934	1.16402	2.92789	1.29596	1.63362	1.02577	1.47816	1.95165	2.24008	1.44672	1.37401	0.490839	1.03795	2.09961	1.1917	1.26698	1.10159	1.13066	1.94741	1.14177	0.85719	1.86682	1.13807	2.99176	1.79856	1.76116	2.64426	2.87201	1.70865	1.67209	2.34917	1.27755	2.89168	2.19472	1.75851	3.53195
Cell_0165	FOXO_TR	Insulin 10000 ng/ml	3.21715	2.42955	3.68042	3.83256	3.44119	2.72236	2.59154	2.47174	4.33339	3.14914	3.46867	1.52206	1.25396	4.04758	3.69597	2.09503	2.30216	1.3328	2.12878	3.67419	2.76663	2.27611	1.49828	3.21708	2.93732	1.67369	2.66326	0.749953	2.85736	2.8819	3.17413	1.95644	3.01204	2.87585	4.04379	3.5481	3.89904	2.66685	5.14553	4.45343	2.81926	4.83512	1.17501	4.93812	2.34023	1.55198	3.75868
Cell_0165	AMPKARt2	Insulin 10000 ng/ml	0.538018	0.428051	0.633179	0.414506	0.490995	0.556983	0.45627	0.538285	0.554055	0.466944	0.481214	0.410108	0.622142	0.315835	0.559468	0.342164	0.526073	0.539808	0.276933	0.474536	0.389124	0.600161	0.596362	0.530157	0.30513	0.264772	0.440307	0.647975	0.348293	0.424919	0.469141	0.274693	0.563861	0.49246	0.468058	0.572399	0.60268	0.599289	0.608872	0.456655	0.315073	0.456382	0.656907	0.398219	0.4765	0.301624	0.305679
Cell_0166	TFEB_TR	Insulin 10000 ng/ml	2.23885	1.3257	1.38172	1.50035	1.24661	0.697088	1.10244	4.38272	2.61837	2.502	2.62753	1.49773	1.13206	2.80404	1.34	1.1543	1.21406	1.45795	2.1665	2.26008	1.07935	0.896594	0.460068	1.05786	1.89799	1.06289	1.23332	1.17504	1.15834	2.02469	1.30968	1.08354	1.59722	1.21602	2.69929	2.00356	1.6608	5.16236	3.0203	2.90652	1.65844	3.05616	1.16078	2.93005	1.96763	1.74735	2.54737
Cell_0166	FOXO_TR	Insulin 10000 ng/ml	3.24487	2.43637	3.96605	3.79802	3.36089	2.5808	2.48244	2.3972	4.25992	3.43266	3.43117	1.64349	1.26545	3.54872	3.90573	1.96018	2.36613	1.35612	2.17814	3.40027	2.66671	2.39196	1.38811	2.9301	3.17657	1.69039	2.44656	0.722574	2.77672	2.82414	3.00136	2.10717	2.94154	2.48407	3.82919	3.68312	3.87082	2.57491	4.68295	4.32623	2.6435	4.90792	1.21937	4.87916	2.18315	1.67474	3.64744
Cell_0166	AMPKARt2	Insulin 10000 ng/ml	0.545847	0.414676	0.658503	0.404086	0.464344	0.569227	0.449277	0.577224	0.531648	0.485317	0.487064	0.39782	0.595199	0.330194	0.5382	0.361415	0.549436	0.526227	0.284041	0.459912	0.425164	0.593066	0.609664	0.521652	0.298842	0.277407	0.436948	0.662304	0.341906	0.416263	0.48229	0.24641	0.561415	0.478217	0.450739	0.56003	0.62364	0.634897	0.610282	0.454574	0.348188	0.500255	0.640372	0.387047	0.481669	0.299135	0.263185
Cell_0167	TFEB_TR	Insulin 10000 ng/ml	2.57522	1.25658	1.30799	1.52868	1.22848	0.696	1.13119	5.83598	2.50247	2.55417	2.2581	1.49008	1.18319	3.10441	1.33479	0.959569	1.21098	1.43007	1.63123	2.15774	1.18743	1.66138	0.481063	1.07187	2.29004	0.876769	1.34536	1.1853	1.0715	1.38331	1.12891	0.940922	1.40758	1.26562	2.39391	1.80681	1.99008	4.57412	2.31071	2.62136	1.70045	2.1955	1.15257	2.8436	2.21893	1.77349	2.66536
Cell_0167	FOXO_TR	Insulin 10000 ng/ml	3.16524	2.46239	4.34639	3.7196	3.3212	2.57532	2.53626	2.19923	4.3455	3.44821	3.41637	1.52576	1.37795	3.8936	3.45937	1.81738	2.62115	1.3769	2.28505	3.36075	2.64939	2.52415	1.45516	3.02426	3.24491	1.50854	2.49367	0.74844	2.76086	2.96624	3.0951	2.11591	2.96472	2.72376	3.55976	3.43381	3.91322	2.52012	4.11761	4.21215	2.49925	4.57249	1.12768	4.97098	2.3319	1.7656	3.87786
Cell_0167	AMPKARt2	Insulin 10000 ng/ml	0.558481	0.434579	0.608329	0.420233	0.433983	0.549483	0.462234	0.551492	0.51357	0.484605	0.452749	0.412242	0.59787	0.331583	0.520919	0.374419	0.521334	0.517419	0.352737	0.47719	0.503509	0.589454	0.611577	0.533276	0.28559	0.247439	0.413464	0.528443	0.320437	0.40481	0.542179	0.239458	0.571754	0.470297	0.465946	0.572098	0.60008	0.619095	0.584463	0.433815	0.325696	0.491932	0.648467	0.3782	0.502767	0.282168	0.288585
Cell_0168	TFEB_TR	Insulin 10000 ng/ml	2.26398	1.52319	1.44388	1.59474	1.26979	0.703289	1.06672	2.87927	2.37293	2.36503	3.20888	1.52162	1.19498	3.1224	1.52835	1.21488	1.14998	1.44658	1.87168	2.00409	1.24902	1.81508	0.467229	1.14761	1.78214	1.13099	1.40129	1.03428	1.13411	1.85714	0.841862	0.846073	1.30854	1.31522	3.11631	1.63297	2.0784	2.89009	2.5214	2.67091	1.7553	1.84616	1.38583	2.63498	2.11611	1.72045	3.04163
Cell_0168	FOXO_TR	Insulin 10000 ng/ml	3.00638	2.65917	3.96034	3.62457	3.30591	2.18503	2.55643	2.69509	4.0207	3.24498	3.33675	1.50779	1.45061	3.78981	4.26036	1.92312	2.4716	1.44395	2.31329	3.27804	2.67947	2.54948	1.39781	3.23139	2.82123	1.94422	2.65614	0.857089	2.65978	3.03394	3.09477	2.19312	3.29797	2.96344	3.29404	3.45701	4.13238	2.63161	4.07821	4.06167	2.71837	4.64847	1.14072	4.82255	2.48379	1.69424	3.94269
Cell_0168	AMPKARt2	Insulin 10000 ng/ml	0.521481	0.43385	0.610266	0.435458	0.472307	0.539233	0.465691	0.573962	0.476994	0.484761	0.44616	0.401087	0.566408	0.304731	0.536399	0.336251	0.530421	0.526237	0.366554	0.470358	0.508906	0.551627	0.623946	0.526673	0.29529	0.296363	0.428605	0.536165	0.349722	0.378527	0.584661	0.247266	0.598515	0.462376	0.449204	0.553977	0.591776	0.6161	0.578691	0.422391	0.294824	0.50296	0.638055	0.391285	0.479541	0.286663	0.28217
Cell_0169	TFEB_TR	Insulin 10000 ng/ml	2.19722	1.2126	1.23113	1.54319	1.27826	0.711614	1.17624	1.7179	2.22485	2.21484	2.54888	1.61861	1.22923	2.8078	1.58693	1.2358	1.09547	1.43074	1.82014	2.1984	1.17194	1.32261	0.480778	1.20137	2.25694	1.1728	1.46129	1.15338	1.09912	2.13912	0.85634	1.0847	1.23105	1.34178	2.92206	1.86736	2.01052	3.94939	3.3725	1.7487	1.67432	2.23348	1.46082	2.75101	2.18949	1.64567	2.58043
Cell_0169	FOXO_TR	Insulin 10000 ng/ml	3.05939	2.64578	4.09606	3.6637	3.22758	2.21834	2.57472	2.94969	4.31327	3.24543	3.44064	1.76998	1.47748	3.53473	4.34253	1.93849	2.54227	1.40703	2.41648	3.61794	2.63518	2.8615	1.52696	3.36832	3.08092	1.76335	2.4526	0.84933	2.67467	3.02417	2.99817	2.0686	3.45427	3.0488	2.78686	3.31504	4.0405	2.61601	4.00543	3.96838	2.61677	4.66575	1.17144	4.70164	2.51338	1.63994	3.95759
Cell_0169	AMPKARt2	Insulin 10000 ng/ml	0.574023	0.438973	0.604218	0.456735	0.460946	0.504537	0.458473	0.437747	0.463055	0.455701	0.461499	0.393823	0.577193	0.32835	0.519803	0.330025	0.516876	0.53535	0.343772	0.464771	0.550585	0.56307	0.619503	0.534167	0.346539	0.282085	0.431439	0.528448	0.344875	0.405413	0.56509	0.255051	0.579159	0.454739	0.509409	0.529969	0.577271	0.630639	0.570351	0.401888	0.325148	0.453448	0.626553	0.385999	0.448313	0.296792	0.287882
[truncated: 74 more columns]

## Sheet: condition 02
Treatment Spike																					MK-2206 1000 nM
Cell	Signal	Treatment Group	0 minute	6 minute	12 minute	18 minute	24 minute	30 minute	36 minute	42 minute	48 minute	54 minute	60 minute	66 minute	72 minute	78 minute	84 minute	90 minute	96 minute	102 minute	108 minute	114 minute	120 minute	126 minute	132 minute	138 minute	144 minute	150 minute	156 minute	162 minute	168 minute	174 minute	180 minute	186 minute	192 minute	198 minute	204 minute	210 minute	216 minute	222 minute	228 minute	234 minute	240 minute	246 minute	252 minute	258 minute	264 minute	270 minute	276 minute
Cell_0001	TFEB_TR	MK-2206 1000 nM	1.52027	0.392943	0.834504	2.03593	1.32892	0.952271	2.52652	1.25389	0.777355	2.41205	0.639007	0.49043	0.823722	1.00961	0.682311	1.59203	3.85236	1.18163	1.79435	1.53878	1.26881	0.985222	1.75988	0.819708	1.47421	1.20327	1.26849	1.60433	1.05915	1.53506	0.789963	2.21352	1.01677	1.71725	1.38654	1.68605	1.05828	6.73719	2.3069	1.19284	1.6846	0.54381	1.96232		1.71667	1.6207	0.316498
Cell_0001	FOXO_TR	MK-2206 1000 nM	2.19367	0.77683	0.703794	1.07824	1.22793	1.15939	1.10704	0.699714	0.803699	1.40595	0.840725	0.677474	1.09554	1.05033	0.934635	1.19668	2.38763	1.19076	1.01949	0.845835	0.911165	1.0455	2.1143	1.45529	1.0905	1.55121	0.987999	1.21307	1.28983	0.704803	1.12242	1.28782	0.743576	1.0807	0.892841	1.13445	1.19769	2.15213	1.44149	0.782943	1.17452	0.757316	1.16081		1.50423	1.47167	1.0095
Cell_0001	AMPKARt2	MK-2206 1000 nM	0.614015	0.705397	0.637754	0.663056	0.481969	0.304991	0.510372	0.504928	0.534964	0.470833	0.582801	0.660403	0.305066	0.513396	0.707577	0.695342	0.602428	0.683484	0.382849	0.485445	0.660671	0.620654	0.602603	0.697293	0.678445	0.504121	0.52069	0.540452	0.407689	0.448548	0.639675	0.532031	0.658731	0.704352	0.090586	0.627076	0.560069	0.512443	0.512782	0.323706	0.745607	0.643063	0.641297		0.628393	0.751284	0.688932
Cell_0002	TFEB_TR	MK-2206 1000 nM	1.40685	0.416228	0.848241	2.44165	1.02911	0.917046	2.79482	1.2346	0.745495	2.49492	0.622593	0.584487	0.818704	0.969587	0.632367	1.50341	2.16225	1.02432	1.65437	1.54238	1.30687	1.0137	1.75421	0.872902	1.2787	1.40799	1.28971	1.5305	1.13527	1.71466	0.853382	2.76494	1.07106	1.61901	1.31239	1.49826	1.07127	2.72932	2.10626	1.17108	2.00797	0.639071	1.54439		1.59385	1.7717	0.499979
Cell_0002	FOXO_TR	MK-2206 1000 nM	1.97873	0.800549	0.724525	1.11758	1.17008	1.16591	1.11452	0.681184	0.7247	1.39758	0.840262	0.697111	1.10113	1.02138	0.918398	1.07174	1.7445	1.21311	1.08087	0.872371	0.941531	1.07084	2.05218	1.47438	1.03548	1.9313	0.982634	1.18809	1.38088	0.919891	1.16157	1.86231	0.783079	1.04771	0.894844	1.08739	1.21056	2.1287	1.50412	0.751494	1.18694	0.776379	1.16488		1.4004	1.52062	1.08504
Cell_0002	AMPKARt2	MK-2206 1000 nM	0.618088	0.678592	0.653271	0.677147	0.485028	0.310916	0.502267	0.518359	0.569004	0.462158	0.609595	0.682253	0.3152	0.509711	0.717413	0.649443	0.625747	0.694011	0.338843	0.502713	0.648796	0.613365	0.604074	0.699549	0.681983	0.531625	0.518434	0.524058	0.428482	0.45704	0.601169	0.362956	0.62668	0.702302	0.129622	0.624295	0.579066	0.470164	0.537571	0.306803	0.751792	0.605433	0.634565		0.618193	0.759774	0.674128
Cell_0003	TFEB_TR	MK-2206 1000 nM	1.39735	0.398332	0.849966	2.87282	1.06325	0.87314	2.52642	1.28211	0.727725	2.44757	0.631649	0.704144	0.798444	0.97602	0.594291	1.64217	1.82626	1.19276	2.75648	1.4896	1.32948	0.891498	1.72512	0.634269	1.4426	1.57582	1.22723	1.64116	1.18171	1.60316	0.753602	3.16522	1.06346	1.68353	1.4794	1.57438	0.975042	4.33352	2.40408	1.29712	1.73528	0.621685	1.61095		1.66201	1.8598	0.722035
Cell_0003	FOXO_TR	MK-2206 1000 nM	1.79973	0.745223	0.714424	1.11089	1.16286	1.11004	1.1177	0.701489	0.738457	1.43641	0.856621	0.685422	1.10505	0.982797	0.872328	1.08402	1.27432	1.26303	1.26563	0.900689	1.00452	1.05646	2.16586	1.50847	1.03027	1.87031	0.965785	1.22152	1.55898	0.749243	1.10443	2.08889	0.767816	1.0534	0.954343	1.06483	1.2959	2.14373	1.57971	0.874891	1.14153	0.771731	1.06318		1.3957	1.58854	1.09136
Cell_0003	AMPKARt2	MK-2206 1000 nM	0.61595	0.683304	0.622061	0.661543	0.467076	0.306498	0.510468	0.521313	0.544211	0.480247	0.611222	0.655309	0.310173	0.507708	0.711617	0.673662	0.639819	0.696291	0.286349	0.506327	0.636466	0.6399	0.602147	0.704156	0.684707	0.472959	0.487584	0.520131	0.448251	0.456959	0.65808	0.383192	0.638442	0.703621	0.125094	0.623236	0.587794	0.487462	0.548525	0.279333	0.749557	0.61321	0.615321		0.633398	0.741838	0.657901
Cell_0004	TFEB_TR	MK-2206 1000 nM	1.28224	0.433878	0.956056	2.70395	1.31138	0.804357	2.49876	1.2579	0.718268	2.34127	0.600802	0.748675	0.806084	0.905174	0.607493	1.47286	1.80263	1.1604	2.27047	1.57509	1.39768	1.01982	1.57921	0.495684	1.54558	1.56028	1.20589	1.65604	1.27352	1.66373	0.909971	3.93226	1.0566	1.55657	1.39991	1.63396	1.122	8.77062	2.26067	1.2252	1.71495	0.629982	1.68468		1.68167	1.88348	0.430122
Cell_0004	FOXO_TR	MK-2206 1000 nM	1.80334	0.79916	0.744831	1.08556	1.2298	1.11796	1.0849	0.689795	0.730745	1.40107	0.863138	0.671084	1.10827	0.924495	0.87012	1.02711	1.01877	1.18754	1.13898	0.933628	1.0372	1.03442	2.32014	1.54154	1.07214	1.5831	0.998784	1.22253	1.66649	0.835647	1.23051	2.20855	0.790865	1.05964	0.952314	1.06817	1.24277	2.18676	1.51972	0.750469	1.1369	0.744041	1.12768		1.36665	1.66313	1.11613
Cell_0004	AMPKARt2	MK-2206 1000 nM	0.629181	0.650222	0.65455	0.661529	0.490789	0.327947	0.485664	0.475288	0.548871	0.439865	0.633198	0.671964	0.321403	0.523228	0.708149	0.670445	0.635626	0.68081	0.243464	0.495382	0.659972	0.614081	0.623162	0.702522	0.688376	0.48209	0.514976	0.544565	0.474475	0.471118	0.604083	0.319615	0.647708	0.703252	0.11125	0.617961	0.588838	0.484199	0.54325	0.31075	0.767852	0.598801	0.672091		0.62626	0.750741	0.615574
Cell_0005	TFEB_TR	MK-2206 1000 nM	1.21414	0.437976	0.855443	0.949006	1.16191	0.741127	2.53368	1.2233	0.727753	2.46119	0.611022	0.596098	1.02176	0.908791	0.592194	1.41545	2.03376	1.10648	1.58852	1.84952	1.46514	1.12818	1.86205	0.586466	1.48167	1.49333	1.22878	1.60878	1.36534	1.51129	0.856866	4.78785	1.20661	1.77176	1.57522	1.53862	1.22785	6.15569	2.32939	1.32541	1.66932	0.480987	1.47623		1.72373	1.72001	0.608467
Cell_0005	FOXO_TR	MK-2206 1000 nM	1.80848	0.865302	0.724246	0.919835	1.23008	1.0951	1.06907	0.688522	0.753638	1.41596	0.889262	0.682755	1.23572	0.917807	0.863547	1.08313	0.945609	1.21434	1.0977	0.939151	1.02128	1.06685	2.49803	1.58012	1.07702	1.4272	0.964052	1.19093	1.77401	0.760084	1.28679	2.34175	0.779358	1.08079	0.922226	1.08471	1.22061	2.10578	1.54834	0.918183	1.10915	0.740673	1.05943		1.41265	1.62913	1.09171
Cell_0005	AMPKARt2	MK-2206 1000 nM	0.646209	0.633874	0.647382	0.662141	0.49305	0.382683	0.47251	0.481345	0.548838	0.455443	0.612541	0.659195	0.240279	0.543849	0.741285	0.654371	0.616476	0.688582	0.369482	0.484457	0.650664	0.636812	0.609372	0.697174	0.673273	0.49339	0.524395	0.512145	0.500699	0.452603	0.632774	0.311007	0.645695	0.718398	0.121889	0.616506	0.557156	0.512838	0.580789	0.270898	0.739241	0.598085	0.64564		0.635721	0.746815	0.676005
Cell_0006	TFEB_TR	MK-2206 1000 nM	1.18074	0.440616	0.774025	0.916711	0.951853	0.734612	2.44455	1.21649	0.817751	2.47885	0.618044	0.600938	0.899928	0.995178	0.611871	1.65954	1.96241	1.16154	1.4174	1.82092	1.41436	1.11858	1.5192	0.613977	1.79148	1.25602	1.30496	1.64823	1.50603	1.51911	0.932998	3.93628	1.11526	1.60308	1.48223	1.50716	1.18695	3.86341	1.74219	1.27144	1.7778	0.469481	1.31305		1.60911	1.57533	0.598197
Cell_0006	FOXO_TR	MK-2206 1000 nM	1.89896	0.906754	0.694122	0.914564	1.20264	1.10769	1.0917	0.682433	0.909205	1.35373	0.904561	0.666754	1.15855	0.974881	0.857487	1.13577	0.909513	1.23674	1.06433	0.879935	1.00963	0.99851	1.90238	1.49925	1.09771	1.41022	1.01935	1.17687	1.92646	0.7613	1.1902	2.37518	0.801323	1.09063	3.17687	1.08209	1.28322	1.8404	1.56567	0.856104	1.1421	0.730396	1.04649		1.35656	1.54123	1.01147
Cell_0006	AMPKARt2	MK-2206 1000 nM	0.644158	0.634758	0.649709	0.643656	0.505216	0.380434	0.500772	0.486528	0.493252	0.428786	0.589298	0.680323	0.306277	0.53801	0.73354	0.646878	0.652128	0.687276	0.291	0.577776	0.645402	0.624075	0.61729	0.693154	0.68082	0.522873	0.526	0.510402	0.497972	0.437918	0.643025	0.276238	0.639065	0.719049	0.585276	0.620971	0.536849	0.470348	0.586203	0.287582	0.72547	0.613697	0.659493		0.626359	0.731952	0.690011
Cell_0007	TFEB_TR	MK-2206 1000 nM	1.24879	0.480829	0.763286	0.913521	0.932953	0.709849	2.32959	1.2331	0.791085	2.52268	0.610611	0.747914	0.821317	1.0051	0.60879	1.70021	0.978849	1.08391	1.9099	1.58578	1.40515	1.16393	1.70743	0.544833	1.42255	1.67009	1.25115	1.60426	1.39507	1.50716	1.28971	3.89539	0.938642	1.71177	1.56999	1.58236	1.23268	4.24719	2.17105	1.22421	2.08057	0.560961	1.39396		1.64966	1.66883	0.412638
Cell_0007	FOXO_TR	MK-2206 1000 nM	2.11307	1.00567	0.735778	0.919056	1.23213	1.05995	1.0946	0.690628	0.839404	1.3802	0.938685	0.666844	1.13866	0.975842	0.847995	1.17459	0.889095	1.20392	1.11693	0.777372	0.968519	1.06422	1.75949	1.58843	1.07263	1.37253	0.993505	1.1706	1.9203	0.764879	1.25313	2.36498	0.810842	1.09521	3.20276	1.11307	1.23597	1.69806	1.65342	0.815638	1.22222	0.711729	1.06191		1.47725	1.496	1.04189
Cell_0007	AMPKARt2	MK-2206 1000 nM	0.640296	0.635273	0.654286	0.642444	0.47875	0.342489	0.48494	0.528232	0.526614	0.433931	0.602411	0.671196	0.328791	0.522031	0.721741	0.650326	0.654888	0.708722	0.224785	0.591514	0.670294	0.630788	0.599522	0.70933	0.677218	0.532695	0.524783	0.527319	0.505745	0.435431	0.663892	0.305385	0.655454	0.703372	0.550838	0.618703	0.564151	0.473977	0.583537	0.303875	0.727953	0.574078	0.649468		0.64258	0.730594	0.681928
Cell_0008	TFEB_TR	MK-2206 1000 nM	1.317	0.468701	0.720043	0.903143	1.14747	0.789101	2.62484	1.24005	0.901223	2.51061	0.58915	0.679883	0.873871	1	0.628272	1.65225	1.99357	1.23449	1.86086	1.34973	1.43007	1.25775	1.67996	0.554313	1.61179	1.49301	1.2365	1.5975	1.72024	1.60479	1.16066	3.87553	1.00361	1.62135	1.79445	1.24366	1.20066	4.31234	1.95608	1.224	2.77835	0.508221	1.30926		1.66985	1.69726
Cell_0008	FOXO_TR	MK-2206 1000 nM	2.39244	0.976224	0.724488	0.89594	1.25704	1.0829	1.1111	0.678619	0.957029	1.34251	0.892909	0.660792	1.1154	0.965367	0.843495	1.22213	0.853035	1.24157	1.10669	0.700293	0.996352	1.07921	1.68681	1.52836	1.09512	1.50796	0.946315	1.1853	2.24063	0.807316	1.3352	2.60379	0.812605	1.07656	3.27361	1.14518	1.27563	1.77281	1.61751	0.861715	1.09206	0.682914	1.10417		1.43027	1.45858
Cell_0008	AMPKARt2	MK-2206 1000 nM	0.632223	0.642331	0.646489	0.584704	0.487384	0.284601	0.510001	0.496386	0.500867	0.474829	0.600418	0.667412	0.307894	0.492127	0.740792	0.653687	0.646153	0.682012	0.254015	0.558957	0.661761	0.606015	0.601991	0.698635	0.671941	0.543243	0.527689	0.534601	0.540018	0.455197	0.618882	0.292628	0.639539	0.712988	0.527799	0.625266	0.567532	0.441029	0.591341	0.271124	0.729478	0.56775	0.655006		0.644102	0.749529
Cell_0009	TFEB_TR	MK-2206 1000 nM	1.39163	0.440074	0.811904	0.90985	1.3839	0.790423	1.42083	1.24383	0.85312	2.54377	0.589867	0.837909	0.880564	1.00505	0.651487	1.68239	1.42961	1.15943	2.76534	1.2422	1.40996	1.25224	1.60379	0.509973	1.4746	1.50417	1.20976	1.64234	2.19716	1.63249	1.18545	3.43327	0.874914	1.69744	1.81623	1.54156	1.22583	1.95712	1.81049	1.31796	2.30278	0.531824	1.44038		1.58593	1.68647
Cell_0009	FOXO_TR	MK-2206 1000 nM	2.23369	0.905742	0.7431	0.900166	1.23573	1.10229	1.42626	0.664571	0.918707	1.37841	0.899782	0.656962	1.18128	1.00169	0.833907	1.159	0.829488	1.25674	1.29444	0.665534	0.977424	1.04333	1.57925	1.56417	1.08682	1.63986	0.94654	1.17806	2.41221	0.831916	1.34896	2.91005	0.828369	1.04948	3.14205	1.11196	1.26564	1.70542	1.82406	0.962294	1.22862	0.753356	1.09229		1.42667	1.41428
Cell_0009	AMPKARt2	MK-2206 1000 nM	0.654927	0.664912	0.644757	0.625779	0.490299	0.309729	0.460743	0.485519	0.514962	0.413978	0.594464	0.683124	0.254261	0.502291	0.687905	0.62348	0.617604	0.692535	0.202041	0.542664	0.634994	0.632885	0.615293	0.712143	0.663046	0.568556	0.519006	0.540651	0.528485	0.446811	0.624874	0.325418	0.649674	0.711651	0.500761	0.625464	0.567834	0.412224	0.606755	0.249375	0.732754	0.583426	0.636894		0.638846	0.737411
Cell_0010	TFEB_TR	MK-2206 1000 nM	1.41178	0.440482	0.783949	0.900937	1.29519	0.748817	1.7629	1.2719	0.875409	2.53502	0.602443	0.64448	0.933238	1.04165	0.574232	1.98272	2.50017	1.12654	2.06431	1.2471	1.51743	0.955929	1.41906	0.54379	1.36555	1.15591	1.20878	1.58857	1.92283	1.67908	1.21024	2.93607	0.911599	1.52533	1.62577	1.58722	1.18035	0.674463	1.83718	1.26283		0.399469	1.90424		1.58638	1.68186
Cell_0010	FOXO_TR	MK-2206 1000 nM	2.24747	0.902511	0.731903	0.878415	1.25052	1.08898	1.51463	0.667752	0.910292	1.33736	0.943112	0.668243	1.21548	1.03947	0.913073	1.25762	0.867153	1.27913	1.15101	0.641865	1.10141	1.05596	1.31915	1.60368	1.09084	1.56948	0.943483	1.14591	2.46851	0.842678	1.36273	2.50486	0.828475	1.08147	2.95577	1.15403	1.29829	1.63122	1.77424	0.903619		0.775588	1.19861		1.43964	1.38384
Cell_0010	AMPKARt2	MK-2206 1000 nM	0.661438	0.661997	0.654258	0.623307	0.503825	0.340657	0.458979	0.512601	0.490199	0.444837	0.629362	0.692755	0.318144	0.477744	0.683137	0.622707	0.630425	0.69584	0.232992	0.534107	0.661911	0.656145	0.639919	0.709688	0.685231	0.586163	0.523659	0.538806	0.544948	0.438514	0.630866	0.300401	0.64546	0.708523	0.506463	0.629676	0.577887	0.643341	0.603118	0.258241		0.585989	0.664224		0.668368	0.734249
Cell_0011	TFEB_TR	MK-2206 1000 nM	1.44463	0.489149	0.801246	0.920739	1.24894	0.800066	0.787474	1.28082	0.88369	2.3729	0.602314	0.689229	0.963611	1.01653	0.602835	1.91875	3.95431	1.07901	2.38869	1.21111	1.50398	1.45721	1.42742	0.579886	1.77798	1.40418	1.25297	1.55028	2.15196	1.61102	1.16719	3.24034	0.828992	1.55559	1.77684	1.59877	1.13487	0.505903	1.92466	1.25382		0.436687	1.65324		1.55419	1.64774
Cell_0011	FOXO_TR	MK-2206 1000 nM	2.56169	0.879214	0.736184	0.882634	1.25227	1.1001	1.41461	0.683653	0.947985	1.33045	0.956853	0.696947	1.28048	1.0171	0.916044	1.23152	0.853077	1.2215	1.30606	0.64583	1.07832	1.07172	1.07098	1.64401	1.11244	1.5067	0.961346	1.17644	2.46444	0.818087	1.3028	2.53021	0.786268	1.13623	2.95797	1.21429	1.33095	1.58245	1.79892	0.892357		0.734874	1.11489		1.45159	1.42853
Cell_0011	AMPKARt2	MK-2206 1000 nM	0.661697	0.635381	0.66179	0.632746	0.484507	0.339352	0.492309	0.53281	0.484749	0.39856	0.629737	0.688371	0.192558	0.501281	0.69066	0.593213	0.605809	0.690587	0.236173	0.521551	0.637679	0.626767	0.666293	0.691492	0.67374	0.555744	0.533735	0.541837	0.541416	0.45717	0.618218	0.333651	0.619303	0.708786	0.495656	0.62943	0.587939	0.664578	0.61546	0.274725		0.561133	0.641056		0.670229	0.732648
Cell_0012	TFEB_TR	MK-2206 1000 nM	1.68474	0.441944	0.6804	0.91167	1.14615	0.772191	0.656856	1.30063	0.902553	2.71674	0.593571	0.859191	0.848398	1.04049	0.652961	1.74534	2.84576	1.1451	2.74421	1.26915	1.5244	1.00357	1.20216	0.711904	1.28009	1.46211	1.28437	1.59742	2.38144	1.53553	0.8491	2.08882	0.79371	1.51909	1.67693	1.7105	1.19534	0.440336	1.97889	1.29764		0.581453	1.09458		1.52465	1.60224
Cell_0012	FOXO_TR	MK-2206 1000 nM	2.65579	0.841824	0.673734	0.86296	1.23076	1.09658	1.4121	0.692101	0.919728	1.30437	0.962659	0.725279	1.18492	1.02878	0.923392	1.26235	0.879652	1.23787	1.31019	0.647161	1.06483	1.0672	0.99734	1.58905	1.0419	1.51993	0.975144	1.18345	2.681	0.798024	1.24883	2.53228	0.798855	1.14447	2.92701	1.25736	1.35558	1.56779	1.79978	0.88524		0.786723	1.13471		1.40065	1.40095
Cell_0012	AMPKARt2	MK-2206 1000 nM	0.648078	0.680418	0.655037	0.630636	0.491644	0.316177	0.451985	0.515843	0.484202	0.488751	0.62242	0.682516	0.282415	0.486378	0.702109	0.607506	0.62887	0.693452	0.221646	0.51265	0.640404	0.609515	0.635935	0.710068	0.65041	0.550916	0.516031	0.52351	0.556144	0.453431	0.642576	0.335236	0.646452	0.700439	0.614553	0.626296	0.583282	0.629031	0.59483	0.272486		0.572599	0.642029		0.672904	0.745823
Cell_0013	TFEB_TR	MK-2206 1000 nM	1.55215	0.402405	0.645576	0.90494	1.31037	0.785336	0.620515	1.32511	0.871685	1.36168	0.575701	0.765452	0.817614	1.06904	0.628864	2.0472	1.26452	1.16992	2.61717	1.32198	1.59075	1.19538	1.19055	0.665461	1.41414	1.50225	1.25393	1.61139	2.15998	1.57252	0.783891	1.88017	0.820074	1.73628	1.59865	1.57826	1.30525	0.515687	2.04575	1.28538		0.666215	1.48465		1.51864	1.76842
Cell_0013	FOXO_TR	MK-2206 1000 nM	2.61419	0.816386	0.667178	0.85105	1.23102	1.06855	1.3681	0.689677	0.86532	1.14306	0.952675	0.714093	1.22641	1.00264	0.992821	1.30211	0.873893	1.30872	1.36212	0.650705	1.06678	1.09592	0.959748	1.58082	1.04574	1.48874	0.95837	1.20305	2.94747	0.822978	1.21525	2.44568	0.809797	1.18619	2.75092	1.26006	1.34033	1.52398	1.82406	0.897353		0.756586	1.11323		1.31368	1.43109
Cell_0013	AMPKARt2	MK-2206 1000 nM	0.650656	0.689985	0.633897	0.629481	0.499353	0.297737	0.458127	0.496223	0.496356	0.448782	0.640229	0.700995	0.272452	0.472293	0.70919	0.632967	0.643133	0.692632	0.202635	0.521199	0.621483	0.637826	0.602654	0.696778	0.665277	0.559161	0.499165	0.519426	0.538613	0.449082	0.614363	0.317606	0.637092	0.700444	0.596848	0.635145	0.574094	0.627294	0.596244	0.267879		0.520532	0.644052		0.65133	0.736481
Cell_0014	TFEB_TR	MK-2206 1000 nM	1.51639	0.387873	0.61981	0.929361	1.09334	0.811304	0.805499	1.34805	0.868357	1.24529	0.57427	0.609608	0.842602	1.13479	0.597715	1.72396	2.0042	1.2026	2.54254	1.18842	1.60268	1.11974	0.983372	0.594524	1.68053	1.52262	1.23318	1.60169	1.96437	1.64809	1.1344	2.16235	0.863056	1.63618	1.67105	1.75829	1.27235	0.45857	1.79261	1.28672	1.56994	0.726752	1.43874		1.37449	1.84733
Cell_0014	FOXO_TR	MK-2206 1000 nM	2.62892	0.80426	0.678118	0.848309	1.20072	1.10207	1.33298	0.706729	0.827315	1.08366	0.947582	0.76305	1.18294	1.00751	0.908974	1.23449	0.915024	1.26642	1.35424	0.643446	1.17317	1.05552	0.898602	1.60578	1.00656	1.30495	0.969698	1.17359	2.53251	0.829346	1.32502	2.53187	0.834361	1.20979	2.4017	1.32453	1.28093	1.39113	1.73324	0.883242	1.11121	0.767588	1.1276		1.33937	1.35509
Cell_0014	AMPKARt2	MK-2206 1000 nM	0.658912	0.685112	0.658711	0.612044	0.507578	0.346244	0.421448	0.510418	0.460962	0.465984	0.612103	0.687016	0.257407	0.436618	0.720571	0.66817	0.643145	0.681027	0.20818	0.518888	0.665043	0.585154	0.637795	0.712142	0.651308	0.59816	0.534445	0.51513	0.512805	0.456126	0.626654	0.374883	0.65047	0.699074	0.59024	0.625494	0.539193	0.639612	0.582652	0.266167	0.57794	0.528332	0.644171		0.679644	0.729011
Cell_0015	TFEB_TR	MK-2206 1000 nM	1.70639	0.372581	0.698027	0.922359	1.68607	0.805682	0.457235	1.38401	0.870323	1.48711	0.580739	0.622561	0.843775	1.26645	0.617904	1.49383	2.11413	1.16733	1.73259	1.18817	1.59191	1.00106	1.12378	0.673395	1.9672	1.54298	1.24059	1.60776	1.81563	1.80188	0.879356	2.63797	0.852888	1.76997	1.83512	1.65974	1.28634	0.904839	2.19582	1.42826	1.56941	0.736974	1.33475		1.3248	1.6372
Cell_0015	FOXO_TR	MK-2206 1000 nM	2.63435	0.78201	0.6984	0.846686	1.28473	1.119	1.39921	0.694558	0.812667	1.19382	0.975523	0.771666	1.09487	1.04899	0.906214	1.13158	0.908184	1.28504	1.19103	0.647343	1.15087	1.06178	0.841791	1.49728	1.07517	1.12116	0.962396	1.1962	2.4347	0.874827	1.28429	2.52798	0.806693	1.24102	2.39997	1.30867	1.35888	1.52911	1.7338	1.04636	1.11766	0.767693	1.13294		1.35328	1.42082
Cell_0015	AMPKARt2	MK-2206 1000 nM	0.636136	0.678824	0.64057	0.618702	0.543234	0.337079	0.450668	0.506728	0.518725	0.44491	0.641008	0.696198	0.331346	0.400327	0.71316	0.657662	0.652433	0.698476	0.12314	0.52433	0.654757	0.626849	0.605493	0.699107	0.67008	0.637158	0.503929	0.526598	0.513498	0.460991	0.676397	0.392989	0.650402	0.704948	0.614756	0.634847	0.544298	0.648573	0.576055	0.282545	0.541825	0.512586	0.623013		0.682029	0.739005
Cell_0016	TFEB_TR	MK-2206 1000 nM	1.65967	0.365769	0.682749	0.929526	1.75878	0.786933	0.530494	1.41794	1.00816	1.48008	0.567349	0.719521	0.902012	1.21595	0.629433	1.67177	1.57915	1.18825	3.10686	1.22494	1.63263	1.07638	1.06265	0.688676	1.57699	1.33934	1.21	1.5547	1.92666	1.9399	1.06559	2.32403	0.829839	1.70586	1.77213	1.66675	1.32665	0.809076	2.00288	1.38472	1.62997	0.876324	1.47149		1.26403	1.53227
Cell_0016	FOXO_TR	MK-2206 1000 nM	2.55336	0.757883	0.671541	0.828988	1.24101	1.08692	1.39584	0.705522	0.959203	1.1743	0.920711	0.750149	1.16034	0.999037	1.00417	1.20919	0.885432	1.18894	1.22085	0.665217	1.17412	1.08095	0.858309	1.55137	1.05989	1.01681	0.99068	1.19103	2.43422	0.908948	1.2624	2.53297	0.835193	1.24868	2.49766	1.36274	1.32292	1.43843	1.68258	0.993448	1.16417	0.800098	1.14455		1.36873	1.46828
Cell_0016	AMPKARt2	MK-2206 1000 nM	0.641646	0.681009	0.639674	0.604015	0.53307	0.397175	0.497489	0.514909	0.550861	0.433254	0.646149	0.693144	0.303236	0.392442	0.684834	0.667272	0.659161	0.689058	0.189908	0.5173	0.669336	0.619821	0.62525	0.689666	0.677588	0.617393	0.529536	0.535679	0.535409	0.455193	0.604941	0.378743	0.667679	0.699256	0.619727	0.639784	0.540307	0.652225	0.595734	0.303533	0.544626	0.497468	0.626321		0.68709	0.725906
Cell_0017	TFEB_TR	MK-2206 1000 nM	1.73049	0.357204	0.682029	0.93552	1.62472	0.86516	0.587335	1.41301	0.933474	1.51075	0.569914	0.673793	1.37322	1.33933	0.626485	1.77379	1.00867	1.13464	1.85046	1.21358	1.59246	1.21918	1.10552	0.712848	1.89585	1.20997	1.15892	1.654	2.00638	1.85136	0.951468	2.01008	0.795487	1.93608	1.95461	1.78772	1.30312	1.1679	2.52839	1.3947	1.67248	0.673389	1.35517		1.26194	1.57365
Cell_0017	FOXO_TR	MK-2206 1000 nM	2.44244	0.759194	0.691634	0.820698	1.21667	1.12315	1.39893	0.701584	0.920419	1.30219	0.900632	0.776614	1.94346	1.02987	1.02209	1.10995	0.820163	1.22037	1.24231	0.66786	1.11802	1.07848	0.876042	1.53841	1.01113	0.901891	1.00787	1.19465	2.13164	0.873658	1.11911	2.53795	0.84195	1.2667	2.59622	1.36167	1.29558	1.47704	1.75865	1.09783	1.23243	0.711508	1.17296		1.34228	1.5348
Cell_0017	AMPKARt2	MK-2206 1000 nM	0.631901	0.662173	0.64662	0.608731	0.523306	0.369875	0.488491	0.505547	0.483187	0.433093	0.644155	0.693572	0.538131	0.39944	0.707598	0.650762	0.675546	0.696532	0.108252	0.532872	0.671314	0.613113	0.617149	0.692102	0.662944	0.613433	0.520497	0.513098	0.480285	0.460182	0.615652	0.364498	0.651417	0.687831	0.638803	0.636814	0.550507	0.646195	0.587043	0.28806	0.561299	0.41262	0.627518		0.675494	0.735473
Cell_0018	TFEB_TR	MK-2206 1000 nM	1.79362	0.386207	0.67398	0.927546	1.49258	0.802614	0.405347	1.40883	0.925464	1.61779	0.5753	0.779077	1.19598	1.37035	0.660568	1.68949	1.22075	1.2265	1.99198	1.1958	1.58429	1.16477	1.10527	0.797699	1.73317	1.33463	1.17389	1.72121	1.6306	2.0042	0.852982	2.11578	0.626243	1.99808	1.97092	1.90868	1.28017	1.17954	2.22048	1.36254	1.6301	1.11975	1.49798	0.956686	1.2611	1.66026
Cell_0018	FOXO_TR	MK-2206 1000 nM	2.5137	0.776245	0.710612	0.794166	1.24455	1.11084	1.40836	0.716234	0.903426	1.27274	0.866137	0.756767	1.72142	1.02562	1.00229	1.0989	0.825536	1.24872	1.20197	0.667292	1.18608	1.08205	0.884082	1.53584	1.04264	0.899189	1.0394	1.23037	1.68488	0.911215	1.16448	2.5421	0.804103	1.3052	2.73638	1.3606	1.29234	1.50114	1.65092	1.05215	1.19698	0.734649	1.22294	3.43803	1.35982	1.49588
Cell_0018	AMPKARt2	MK-2206 1000 nM	0.655158	0.688408	0.659785	0.593308	0.517272	0.345929	0.418963	0.499888	0.49907	0.452921	0.635085	0.702966	0.512926	0.388104	0.702579	0.65857	0.6338	0.685805	0.194577	0.535984	0.653204	0.592408	0.634241	0.692477	0.681841	0.598487	0.534867	0.515157	0.521357	0.458411	0.630526	0.387932	0.654712	0.686202	0.631525	0.633844	0.536801	0.677905	0.563706	0.280949	0.538795	0.394554	0.636476	0.615364	0.686582	0.747877
Cell_0019	TFEB_TR	MK-2206 1000 nM	1.70842	0.382935	0.724272	0.931309	1.33429	0.7847	0.580468	1.46627	0.940536	1.89466	0.59856	0.745897	1.40545	1.30951	0.643928	1.87893	1.33662	1.32133	3.44835	1.27324	1.65724	0.930211	1.14634	0.541379	1.65292	1.08981	1.18869	1.68707	1.53976	1.90528	0.805848	1.96339	0.776934	1.97009	2.21488	1.85063	1.30472	1.57596	2.23584	1.39946	1.68774	0.989634	1.46459	0.959898	1.33184	1.7414
Cell_0019	FOXO_TR	MK-2206 1000 nM	2.58805	0.809953	0.755714	0.798485	1.21365	1.09537	1.39945	0.723407	0.966298	1.27663	0.888913	0.728022	1.70237	1.04049	1.0287	1.15636	0.798158	1.24237	1.33349	0.670294	1.17319	1.07333	0.818147	1.54967	1.03865	0.779838	1.03628	1.23705	1.30587	0.89357	1.17581	2.52632	0.90499	1.32371	3.048	1.39628	1.25838	1.6958	1.72898	1.14165	1.26401	0.741436	1.1811	3.40098	1.28821	1.50809
Cell_0019	AMPKARt2	MK-2206 1000 nM	0.638262	0.683961	0.675273	0.58002	0.530636	0.339518	0.416248	0.51471	0.498699	0.46081	0.623945	0.687303	0.493624	0.430896	0.739893	0.647821	0.665591	0.686786	0.0599551	0.533216	0.62506	0.575486	0.609843	0.707408	0.668465	0.555295	0.524099	0.519374	0.518053	0.463709	0.669219	0.399748	0.647495	0.695372	0.628692	0.640898	0.541093	0.666105	0.573352	0.312152	0.535189	0.397837	0.623562	0.60954	0.649489	0.732964
Cell_0020	TFEB_TR	MK-2206 1000 nM	2.31333	0.366591	0.658991	0.939679	1.175	0.854001	0.735327	1.46762	0.984681	1.89949	0.626831	0.574398	1.53632	1.37351	0.644937	1.7379	0.909215	1.19343	2.27786	1.15806	1.84606	1.43092	1.10969	0.686953	1.30244	1.17038	1.18773	1.64904	1.41028	1.84661	0.850886	1.79896	0.844793	1.99256	1.958	1.92169	1.37529	1.97667	2.20138	1.32905	1.67323	1.29353	1.63409	0.993055	1.39848	1.70317
Cell_0020	FOXO_TR	MK-2206 1000 nM	2.52957	0.781078	0.700469	0.811341	1.21791	1.14354	1.41225	0.722144	0.94595	1.34447	0.933544	0.72025	1.65652	1.09509	1.02408	1.22257	0.787115	1.19417	1.27199	0.654812	1.18561	1.03762	0.789618	1.47822	1.10124	0.778322	1.04377	1.2492	1.14991	0.889683	1.20995	2.59615	0.873331	1.38167	3.24392	1.34806	1.38514	1.74359	1.71274	1.03115	1.22995	0.759048	1.25124	3.72366	1.29075	1.53114
Cell_0020	AMPKARt2	MK-2206 1000 nM	0.619461	0.695335	0.656195	0.578867	0.505047	0.304227	0.439208	0.509051	0.521878	0.455017	0.633589	0.686548	0.488017	0.473414	0.737248	0.648914	0.646583	0.685064	0.185872	0.526527	0.639158	0.591159	0.631099	0.688254	0.667644	0.559026	0.516231	0.516804	0.525816	0.439343	0.655407	0.36547	0.66276	0.69056	0.562807	0.635025	0.571845	0.676954	0.582544	0.315368	0.539116	0.42654	0.618052	0.604105	0.658101	0.736508
Cell_0021	TFEB_TR	MK-2206 1000 nM	1.9744	0.369501	0.711434	0.939204	1.13992	0.855116	0.782769	1.52447	1.04911	2.29113	0.592431	0.730282	1.53526	1.33078	0.607266	0.984865	0.91459	1.26992	1.73041	1.14012	1.9333	1.25945	1.13246	0.63584	1.57604	1.12199	1.18521	1.68928	1.44816	1.8881	0.780592	1.67392	0.813316	1.94637	2.05862	1.90938	1.43224	0.653561	2.11202	1.3034	1.76516	1.22773	1.66262	1.0178	1.34901	1.81941
Cell_0021	FOXO_TR	MK-2206 1000 nM	1.79915	0.792033	0.721679	0.819289	1.22663	1.15948	1.46225	0.763785	1.00183	1.3162	0.935963	0.69919	1.69435	1.01411	1.0555	2.53198	0.764973	1.18887	1.13096	0.663279	1.25562	1.03661	0.740892	1.5077	1.14061	0.817746	1.0392	1.22626	0.974098	0.91379	1.20102	2.40829	0.902727	1.34015	3.23984	1.35614	1.36681	1.72016	1.82111	1.00935	1.26795	0.76946	1.27275	3.7518	1.36043	1.56438
Cell_0021	AMPKARt2	MK-2206 1000 nM	0.638936	0.705528	0.657805	0.574497	0.501341	0.299644	0.444475	0.48749	0.496842	0.450546	0.662097	0.685761	0.492342	0.535039	0.714036	0.573126	0.639465	0.681224	0.0968754	0.53306	0.66902	0.603044	0.634494	0.703683	0.664042	0.574736	0.490644	0.533985	0.494433	0.457451	0.632041	0.367157	0.645321	0.681992	0.540633	0.647646	0.546915	0.674337	0.571223	0.32623	0.544297	0.357457	0.641676	0.5996	0.678054	0.71213
Cell_0022	TFEB_TR	MK-2206 1000 nM	1.87745	0.355218	0.685182	0.933323	1.32401	0.837641	0.682949	1.51155	1.10561	1.9911	0.576369	0.679225	1.40837	1.13715	0.627198	1.03763	1.20655	1.22959	1.73688	1.13802	1.81173	1.41521	1.14317	0.757048	1.32195	1.0896	1.18932	1.66572	1.79282	1.92848	0.850501	1.53838	0.69151	2.17032	2.74704	1.87015	1.40701	0.552653	2.13795	1.29792	1.757	1.30303	1.40181	1.13676	1.44114	1.77316	0.59257
Cell_0022	FOXO_TR	MK-2206 1000 nM	1.39631	0.754893	0.736073	0.817338	1.20978	1.14999	1.4076	0.756502	1.0284	1.28227	0.955463	0.710268	1.72304	1.04745	1.07509	2.52812	0.758763	1.19851	1.24084	0.657	1.18288	1.05648	0.767122	1.53487	1.08152	0.781251	1.05536	1.22733	1.06498	0.967757	1.26191	1.80089	0.846947	1.41966	3.26737	1.37554	1.29444	1.67182	1.84138	1.00298	1.28391	0.740786	1.26651	3.51279	1.32482	1.49322	1.67779
Cell_0022	AMPKARt2	MK-2206 1000 nM	0.61725	0.681505	0.65977	0.588051	0.476409	0.326888	0.433332	0.479635	0.529349	0.468473	0.645933	0.681555	0.479129	0.578682	0.723429	0.562813	0.655887	0.695658	0.0850847	0.528	0.605963	0.583586	0.647889	0.696424	0.672349	0.545584	0.513915	0.525157	0.464618	0.469681	0.650925	0.3938	0.664185	0.690592	0.532525	0.640766	0.544839	0.681878	0.570937	0.331479	0.548773	0.405636	0.637874	0.603193	0.673839	0.732502	0.308693
Cell_0023	TFEB_TR	MK-2206 1000 nM	1.65656	0.343996	0.652411	0.943294	1.54513	0.797582	0.669125	1.53366	1.13559	2.59996	0.55712	0.815662	1.53449	1.13871	0.610528	1.13506	0.618279	1.24686	2.69007	1.16439	1.87413	1.1755	1.26929	0.589018	1.40378	1.10086	1.2219	1.63412	1.98553	1.87707	0.772167	1.02996	0.721054	2.11405	2.47782	1.81605	1.36967	0.591119	1.71001	1.29794	1.74185	1.43421	1.57804	1.0678	1.39645	2.15732	0.530262
Cell_0023	FOXO_TR	MK-2206 1000 nM	1.1825	0.724061	0.746721	0.822844	1.33427	1.1502	1.41648	0.766724	1.01215	1.40289	0.933912	0.736111	2.06141	1.10497	1.09005	2.399	0.736072	1.20332	1.25148	0.665121	1.19922	0.971832	0.812535	1.54195	1.0862	0.811607	1.00541	1.23919	1.01096	0.930824	1.17403	1.4568	0.898362	1.36183	3.21488	1.36597	1.36051	1.70374	1.88855	0.973116	1.36828	0.703623	1.27166	3.37898	1.32744	1.53757	1.61804
Cell_0023	AMPKARt2	MK-2206 1000 nM	0.603167	0.678832	0.666077	0.589621	0.490469	0.355029	0.415605	0.502144	0.513397	0.467937	0.646935	0.677701	0.484054	0.540891	0.711426	0.593723	0.65013	0.675307	0.0720253	0.554301	0.63854	0.596135	0.657496	0.69816	0.675302	0.569248	0.516427	0.526597	0.476676	0.460977	0.635781	0.370203	0.66439	0.685391	0.525487	0.639897	0.545058	0.695598	0.583433	0.341329	0.53496	0.428716	0.635492	0.604432	0.671853	0.704314	0.277895
Cell_0024	TFEB_TR	MK-2206 1000 nM	1.57567	0.362957	0.612642	0.96793	1.86339	0.875071	0.416774	1.54336	0.989614	2.84535	0.560753	0.753481	1.45582	1.11972	0.65177	1.26098	1.17304	1.43911	2.4131	1.20194	1.80944	0.937451	1.15085	0.649581	1.95112	0.998744	1.21582	1.56772	1.79606	1.78126	0.784224	1.20378	0.681899	1.98573	2.32436	1.98317	1.40052	0.623047	1.8049	1.23406	1.72633	1.26201	1.86115	1.09194	1.38853	2.06696	0.556924
Cell_0024	FOXO_TR	MK-2206 1000 nM	1.03267	0.780816	0.744921	0.802253	1.33817	1.19265	1.39953	0.759605	0.978484	1.44907	0.923111	0.724957	2.34945	1.07695	1.07988	2.33329	0.750072	1.2695	1.2922	0.648782	1.12144	0.983541	0.807116	1.579	1.10387	0.790711	1.03874	1.23314	0.959585	0.933321	1.11005	1.23621	0.849543	1.40577	3.08799	1.39861	1.46805	1.70793	1.77958	0.892695	1.36882	0.713285	1.23362	3.4147	1.33659	1.53868	1.69112
Cell_0024	AMPKARt2	MK-2206 1000 nM	0.598593	0.698252	0.661072	0.530372	0.478386	0.310783	0.421558	0.49095	0.514499	0.45749	0.666296	0.675398	0.450927	0.559664	0.682764	0.587334	0.68323	0.694559	0.0187968	0.556789	0.604097	0.601088	0.63824	0.705333	0.641351	0.558559	0.498097	0.522321	0.484187	0.467348	0.604714	0.302155	0.657961	0.672146	0.541695	0.645044	0.536431	0.688405	0.574931	0.324198	0.544283	0.465337	0.607124	0.595695	0.681734	0.708238	0.272783
Cell_0025	TFEB_TR	MK-2206 1000 nM	1.46683	0.35418	0.699334	1.00633	1.52944	0.819351	0.566726	1.46271	0.919423	2.41756	0.564546	0.79068	1.49295	1.11578	0.647291	1.13944	1.11709	1.3134	1.15227	1.16071	1.93728	1.01919	1.353	0.882992	2.03907	1.03964	1.24117	1.61814	1.52607	1.82695	0.87023	0.998972	0.671492	2.04637	2.11999	1.7762	1.35605	0.680227	1.71109	1.26798	1.94387	0.833934	1.53897	1.05084	1.39677	2.05617	0.589142
Cell_0025	FOXO_TR	MK-2206 1000 nM	0.958346	0.766995	0.784945	0.831566	1.28516	1.15067	1.40196	0.726894	0.888266	1.36716	0.938759	0.719928	2.24875	1.06142	1.10317	2.22912	0.729532	1.24406	2.43316	0.648452	1.28544	0.942863	0.811755	1.6185	1.20502	0.736171	1.0693	1.2325	0.871415	0.930771	1.21226	1.12711	0.829789	1.40769	2.62584	1.38007	1.58587	1.68588	1.74552	0.906692	1.42743	0.693109	1.27305	3.4004	1.30068	1.40358	1.80023
Cell_0025	AMPKARt2	MK-2206 1000 nM	0.583676	0.716718	0.648782	0.561079	0.521033	0.246093	0.405018	0.509334	0.533128	0.470879	0.649882	0.669321	0.370354	0.528377	0.703261	0.617861	0.67153	0.675277	0.712625	0.566397	0.586377	0.588875	0.629791	0.698398	0.656723	0.550399	0.519587	0.512347	0.51117	0.470341	0.608677	0.275967	0.648273	0.683283	0.515697	0.637956	0.546186	0.70726	0.599187	0.334919	0.545545	0.432393	0.662878	0.59914	0.660428	0.724865	0.28152
Cell_0026	TFEB_TR	MK-2206 1000 nM	1.30237	0.346723	0.727061	0.996538	1.65076	0.795506	0.684272	1.42538	0.957848	2.30422	0.568901	0.69884	1.58836	1.03232	0.595121	1.10345	1.31883	1.32251	0.874872	1.23823	1.8972	1.15537	1.23478	0.689549	2.12139	0.952729	1.28587	1.55361	1.523	1.70611	0.756511	0.986396	0.643937	2.11389	2.50778	1.76726	1.4328	0.683143	1.63604	1.28461	1.92944	0.866921	1.41273	1.11617	1.30138	2.1262	0.590125
Cell_0026	FOXO_TR	MK-2206 1000 nM	0.866619	0.776336	0.795459	0.805863	1.50396	1.14658	1.30694	0.726367	0.948696	1.32395	0.956907	0.752704	2.20109	1.03729	1.0648	2.20363	0.731606	1.26899	2.54702	0.643401	1.28032	0.958548	0.792619	1.59341	1.14802	0.692761	1.07552	1.23152	0.850504	0.915637	1.15912	1.09941	0.853642	1.36789	2.2664	1.42687	1.43196	1.7274	1.73993	0.922385	1.4699	0.665384	1.2833	3.1737	1.34104	1.45393	1.83705
Cell_0026	AMPKARt2	MK-2206 1000 nM	0.592604	0.695569	0.646489	0.560727	0.488101	0.306175	0.407476	0.486862	0.52397	0.464718	0.647296	0.662391	0.362033	0.523556	0.690011	0.634489	0.653011	0.694079	0.688154	0.54335	0.603332	0.588408	0.63442	0.697624	0.669156	0.524473	0.51048	0.532116	0.489532	0.470911	0.644504	0.285956	0.672728	0.67348	0.580643	0.652517	0.525588	0.700412	0.600757	0.345932	0.54971	0.503179	0.673413	0.598468	0.676153	0.724243	0.225264
Cell_0027	TFEB_TR	MK-2206 1000 nM	1.39209	0.340172	0.692438	0.967011	1.49218	0.808989	0.745787	1.34529	1.04856	3.39264	0.556316	0.786268	1.84356	0.998099	0.635602	1.00196	1.29213	1.42716	1.82116	1.19805	1.90343	1.03523	1.13442	0.64743	1.50096	0.952022	1.3132	1.56232	1.54682	1.7282	0.788366	1.04094	0.736072	2.02252	2.50582	1.77632	1.41091	0.66578	1.49262	1.26872	1.88708	0.859918	1.38605	1.13556	1.27397	2.12132	0.574146
Cell_0027	FOXO_TR	MK-2206 1000 nM	0.839802	0.764852	0.763967	0.760598	1.43743	1.13445	1.28903	0.725598	0.943647	1.40238	0.949999	0.74006	2.26484	1.06471	1.04048	2.22043	0.771179	1.28816	2.25699	0.631324	1.25536	0.9328	0.795804	1.61877	1.12148	0.704392	1.14515	1.23946	0.82397	0.913163	1.20635	1.05166	0.893808	1.3574	1.86941	1.41279	1.56223	1.79294	1.85778	0.898643	1.53084	0.647273	1.2714	3.14949	1.31889	1.45931	1.34791
Cell_0027	AMPKARt2	MK-2206 1000 nM	0.57545	0.674407	0.658321	0.542104	0.453432	0.225214	0.413295	0.517496	0.528699	0.474947	0.651367	0.661045	0.326327	0.503217	0.706306	0.611329	0.654203	0.660293	0.70238	0.534767	0.618146	0.595097	0.625209	0.712974	0.653993	0.551204	0.523048	0.526167	0.530694	0.482194	0.636467	0.24792	0.648534	0.66286	0.584091	0.647247	0.546232	0.70941	0.584517	0.346545	0.564779	0.460969	0.65003	0.609217	0.679417	0.723593	0.438611
Cell_0028	TFEB_TR	MK-2206 1000 nM	1.25436	0.355646	0.660721	0.949222	1.64759	0.821218	0.730279	1.26645	1.10577	2.95623	0.527604	0.559946	2.04324	1.00649	0.604148	0.972223	1.43554	1.39061	0.884146	1.24851	1.74687	1.92706	1.15936	0.683445	1.29473	0.858567	1.37134	1.50718	1.447	1.85668	0.751019	1.17536	0.856094	1.98322	1.77237	1.64967	1.38901	0.657926	1.64128	1.28217	1.93844	0.68507	1.5261	1.25693	1.24241	2.21876	0.623255
Cell_0028	FOXO_TR	MK-2206 1000 nM	0.837234	0.790691	0.746613	0.734002	1.4198	1.16646	1.3965	0.716399	1.01492	1.40645	0.924675	0.750715	2.31146	1.03339	1.00455	2.21736	0.762017	1.23766	2.31024	0.621242	1.21634	1.0122	0.81397	1.59725	1.16438	0.713453	1.11703	1.21948	0.824287	0.973691	1.18679	1.04793	0.868443	1.32795	1.59394	1.40703	1.6925	1.8839	1.8823	0.922984	1.5525	0.599481	1.30247	3.09857	1.31053	1.46919	1.29434
Cell_0028	AMPKARt2	MK-2206 1000 nM	0.589521	0.719795	0.657002	0.539317	0.434463	0.263397	0.415595	0.491508	0.546718	0.488661	0.663179	0.66989	0.356779	0.496061	0.722984	0.578086	0.661945	0.6839	0.724846	0.553199	0.604673	0.626817	0.636879	0.703242	0.667127	0.568239	0.510496	0.526575	0.54525	0.466167	0.645197	0.273615	0.623242	0.656872	0.61574	0.657011	0.566877	0.701487	0.601469	0.361234	0.554726	0.503743	0.678828	0.6032	0.70882	0.708315	0.372212
Cell_0029	TFEB_TR	MK-2206 1000 nM	1.21254	0.350088	0.64771	0.934981	1.76858	0.799945	0.490399	1.21762	1.08429	2.74151	0.523637	0.66221	2.23651	1.03678	0.607745	0.945305	0.939557	1.47904	0.739585	1.3103	1.74846	0.99692	1.18734	0.788539	1.66614	0.992487	1.31407	1.54981	1.83847	1.88202	0.770122	0.977592	0.754909	2.71907	2.10857	1.75462	1.57097	0.771884	1.74926	1.26676	1.97055	0.687877	1.23079	1.22278	1.19465	2.22829	0.569175
Cell_0029	FOXO_TR	MK-2206 1000 nM	0.831825	0.773202	0.743293	0.72177	1.34315	1.18364	1.22582	0.702232	1.0318	1.41018	0.896197	0.728103	2.35575	1.0424	1.0156	2.30144	0.731798	1.30619	2.38876	0.622137	1.29368	1.07314	0.895231	1.56932	1.13098	0.714837	1.07842	1.24323	0.837663	0.977457	1.13718	0.994207	0.965452	1.34838	1.35414	1.39935	1.40729	1.85674	1.85297	0.874727	1.62181	0.641267	1.28286	3.0217	1.27835	1.44331	1.37698
Cell_0029	AMPKARt2	MK-2206 1000 nM	0.591938	0.690903	0.679922	0.5762	0.462721	0.318896	0.447146	0.512852	0.526877	0.458384	0.681092	0.657475	0.315928	0.480935	0.704791	0.631781	0.663686	0.68037	0.710986	0.564182	0.606718	0.433301	0.629756	0.702186	0.644142	0.539571	0.522268	0.543369	0.561773	0.468012	0.618182	0.235234	0.631641	0.665977	0.620553	0.649999	0.528633	0.685307	0.599686	0.357728	0.570788	0.55503	0.650124	0.597845	0.700377	0.714308	0.305637
Cell_0030	TFEB_TR	MK-2206 1000 nM	1.22524	0.345139	0.6945	0.919667	1.75229	0.806091	0.833748	1.20366	0.996531	2.89084	0.541181	0.763838	2.60038	1.00198	0.61345	1.04036	1.05603	1.52486	1.08819	1.28784	1.60293	0.98972	1.13583	0.734307	1.51892	0.80643	1.37404	1.53119	1.55598	1.95028	0.783561	1.11219	0.740623	1.71994	1.9515	1.87376	1.64699	0.716649	1.90689	1.2939	2.06322	0.540804	1.44453	1.28122	1.18328	2.16772	0.605296
Cell_0030	FOXO_TR	MK-2206 1000 nM	0.840409	0.747309	0.772018	0.71271	1.28423	1.13872	1.03045	0.715152	0.963544	1.41809	0.887959	0.743267	2.5379	1.0212	1.05606	2.39399	0.758317	1.32544	2.50281	0.614821	1.20413	1.2435	0.874006	1.62742	1.21321	0.673654	1.12663	1.24039	0.847201	0.976342	1.08402	1.01507	0.890142	1.3367	1.21535	1.49698	1.42715	1.56702	1.77182	0.851475	1.76607	0.61249	1.3125	3.08328	1.28193	1.51511	1.43744
Cell_0030	AMPKARt2	MK-2206 1000 nM	0.609506	0.688929	0.663033	0.553904	0.429906	0.238805	0.443854	0.49358	0.531195	0.468793	0.648377	0.680574	0.319141	0.467876	0.711268	0.62356	0.674932	0.654633	0.698955	0.569807	0.569767	0.510101	0.640479	0.702684	0.662994	0.554221	0.507215	0.537604	0.572164	0.44572	0.604782	0.218723	0.636922	0.667069	0.616024	0.657953	0.535225	0.709668	0.600643	0.346927	0.553411	0.49628	0.689504	0.61941	0.702395	0.700035	0.327185
Cell_0031	TFEB_TR	MK-2206 1000 nM	1.11984	0.392459	0.647734	0.912549	1.30474	0.883645	0.699459	1.16175	0.953867	3.48658	0.591619	0.691098	2.34226	0.997505	0.607997	1.07408	1.31075	1.41988	1.20084	1.31383	1.63527	1.13888	1.06216	0.848543	1.27274	0.947064	1.30183	1.547	1.74188	1.9906	0.838735	0.754576	0.606479	1.95755	2.69544	1.9929	1.71111	0.661414	1.94697	1.24871	2.16198	0.58743	1.63404	1.27254	1.19387	2.49505	0.652465
Cell_0031	FOXO_TR	MK-2206 1000 nM	0.832938	0.823435	0.711133	0.719844	1.39549	1.20474	0.953457	0.692226	1.01941	1.42595	0.865759	0.741486	2.51629	0.983744	1.04667	2.43298	0.788845	1.32788	2.49562	0.616311	1.25676	1.40093	0.89474	1.66344	1.21459	0.673222	1.10757	1.23826	0.834852	0.955636	1.12078	1.02374	0.860756	1.35664	1.16399	1.59461	1.50253	1.2773	1.79111	0.765436	1.84505	0.610305	1.31102	3.07842	1.23036	1.52579	1.3952
Cell_0031	AMPKARt2	MK-2206 1000 nM	0.612535	0.722797	0.652742	0.57361	0.413475	0.260133	0.407384	0.469584	0.53501	0.489202	0.642361	0.6697	0.361137	0.459186	0.714138	0.63429	0.676892	0.642851	0.687672	0.57737	0.615822	0.486178	0.629578	0.708245	0.664097	0.545666	0.516642	0.519775	0.580684	0.461498	0.592918	0.209686	0.635113	0.659574	0.612062	0.665906	0.506903	0.73403	0.595361	0.337826	0.559687	0.512644	0.660721	0.614582	0.679658	0.703214	0.319457
Cell_0032	TFEB_TR	MK-2206 1000 nM	1.15424	0.380221	0.633905	0.908289	1.98893	0.905213	0.546972	1.11553	0.986019	3.15529	0.581278	0.662871	2.32099	1.04481	0.602316	1.11017	1.27417	1.35621	0.986186	1.243	1.65584	1.08208	1.32185	0.820779	1.76976	0.908441	1.36955	1.5234	1.98505	2.02161	0.818944	0.845104	0.684373	1.9997	2.18594	1.94399	1.80387	0.729385	1.78879	1.2926	2.01861	0.746769	1.61897	1.2843	1.11885	2.38392	0.661467
Cell_0032	FOXO_TR	MK-2206 1000 nM	0.846489	0.804855	0.68591	0.721485	1.47596	1.21168	0.843385	0.673477	1.03786	1.52144	0.892183	0.755951	2.64607	1.00866	1.06259	2.51003	0.789297	1.33467	2.59876	0.622985	1.27924	1.53281	0.902036	1.65108	1.27284	0.694017	1.13384	1.23792	0.826216	0.926695	1.16964	1.02663	0.874713	1.33291	1.13318	1.52401	1.48065	1.0944	1.74606	0.772079	1.88075	0.60466	1.32738	2.85332	1.24143	1.55269	1.31717
Cell_0032	AMPKARt2	MK-2206 1000 nM	0.623559	0.719393	0.652616	0.575688	0.429897	0.264545	0.45044	0.491834	0.542951	0.483834	0.6364	0.669266	0.442345	0.463345	0.706254	0.633781	0.67394	0.655896	0.709314	0.591821	0.548254	0.495168	0.630978	0.708766	0.65051	0.569517	0.510414	0.528818	0.591739	0.463643	0.57238	0.195259	0.63528	0.661273	0.637935	0.667945	0.503714	0.714073	0.592576	0.339364	0.565381	0.459468	0.653756	0.599119	0.693986	0.715117	0.314692
Cell_0033	TFEB_TR	MK-2206 1000 nM	1.15633	0.377496	0.629011	0.90639	1.55204	0.882157	0.465351	1.09927	0.96795	3.07519	0.563086	0.893761	2.37478	1.09419	0.605371	1.33729	1.52991	1.40759	1.42341	1.29522	1.69463	1.048	1.1014	0.793016	1.71807	0.930312	1.15745	1.46161	1.59748	2.16487	0.820846	0.631911	0.60946	2.1016	2.19956	2.31006	1.85617	0.692223	2.11954	1.21755	2.1827	0.748355	1.46124	1.33	1.1605	2.46277	0.666291
Cell_0033	FOXO_TR	MK-2206 1000 nM	0.840205	0.859702	0.701898	0.72923	1.44032	1.21502	0.779262	0.680621	1.04069	1.39547	0.883123	0.77503	2.68758	1.04985	1.03901	2.84663	0.792589	1.23215	2.80426	0.628846	1.27703	1.66354	0.910263	1.63871	3.25742	0.670296	1.24925	1.19115	0.806145	0.965131	1.2513	0.979609	0.831977	1.33014	1.16656	1.47939	1.51029	1.01183	1.73102	0.72165	1.76498	0.625521	1.28764	2.86563	1.23869	1.55862	1.19825
Cell_0033	AMPKARt2	MK-2206 1000 nM	0.61967	0.714648	0.653051	0.575724	0.397614	0.266573	0.426241	0.48186	0.542915	0.564118	0.645231	0.637357	0.468431	0.460562	0.716424	0.627861	0.677817	0.655793	0.708116	0.603558	0.599537	0.497362	0.62972	0.709287	0.569781	0.593284	0.550973	0.538113	0.584591	0.439243	0.579873	0.216929	0.644881	0.663309	0.629751	0.66271	0.520726	0.703141	0.604151	0.363844	0.558991	0.483426	0.655126	0.615935	0.681744	0.716642	0.448756
Cell_0034	TFEB_TR	MK-2206 1000 nM	1.12508	0.35673	0.628724	0.881337	4.15677	0.86376	0.562301	1.13078	0.994473	2.25573	0.585121	0.663652	2.36884	1.09547	0.604629	1.54873	1.50186	1.4361	1.14735	1.24633	1.67249	1.48544	1.05959	0.64618	1.69202	0.944895	1.3697	1.52205	1.62953	2.09026	0.905909	0.837794	0.596334	2.58833	2.2249	1.78466	1.78979	0.969317	2.11253	1.26003	2.2479	0.656596	1.56355	1.17501	1.11024	2.23864	0.688463
Cell_0034	FOXO_TR	MK-2206 1000 nM	0.853506	0.844866	0.715007	0.690903	1.74132	1.19425	0.735099	0.700573	1.0847	1.14032	0.899385	0.881114	2.6812	1.0443	1.01234	2.79739	0.833055	1.23492	2.73635	0.635551	1.24281	1.6828	0.929717	1.70745	3.40811	0.710589	1.15344	1.21557	0.771422	0.937846	1.30287	0.968554	0.826364	1.357	1.15216	1.37774	1.51357	1.01159	1.76041	0.720564	1.48417	0.625037	1.29051	3.09659	1.18865	1.61817	1.19651
Cell_0034	AMPKARt2	MK-2206 1000 nM	0.624709	0.706873	0.671533	0.570043	0.352584	0.319568	0.424964	0.493161	0.554535	0.573031	0.64996	0.664203	0.452478	0.440395	0.728338	0.614942	0.687532	0.662452	0.694186	0.618127	0.620124	0.468093	0.642148	0.70598	0.584802	0.647524	0.505531	0.540358	0.586837	0.427716	0.581228	0.221435	0.647409	0.663587	0.596335	0.6527	0.5143	0.689764	0.593184	0.363597	0.57539	0.511388	0.659996	0.627457	0.66518	0.703003	0.463636
Cell_0035	TFEB_TR	MK-2206 1000 nM	1.13768	0.366386	0.664893	0.897788	2.49578	0.936128	0.470132	1.10626	1.00002	2.14593	0.604578	0.649487	2.45971	1.17519	0.604694	1.76069	1.38562	1.48502	1.14929	1.32317	1.70272	1.37036	1.01573	0.796561	1.60071	0.884278	1.25266	1.53543	1.54486	2.28846	0.882734	0.847865	0.594229	2.47627	1.79374	1.68222	1.71719	0.520128	1.91178	1.22348	2.10059	0.48577	1.86773	1.30649	1.12844	2.14723	0.7844
Cell_0035	FOXO_TR	MK-2206 1000 nM	0.872194	0.863488	0.693707	0.704213	1.45486	1.24197	0.686354	0.670766	1.05906	1.0938	0.927046	0.846781	2.89306	1.04362	1.00757	2.70964	0.831305	1.21305	2.7016	0.64216	1.24691	1.80658	0.920984	1.64892	3.31193	0.720911	1.1718	1.17849	0.79605	0.974165	1.27233	0.959073	0.841039	1.366	1.11137	1.35359	1.69305	0.866092	1.69638	0.690664	1.33164	0.619384	1.26735	2.98377	1.1561	1.58709	1.51616
Cell_0035	AMPKARt2	MK-2206 1000 nM	0.631295	0.71752	0.668065	0.544899	0.449176	0.252494	0.425227	0.494421	0.524474	0.548958	0.631593	0.687225	0.425815	0.422866	0.727441	0.623199	0.674129	0.658006	0.696773	0.620851	0.565874	0.489464	0.637968	0.714329	0.563598	0.628939	0.527111	0.522799	0.584991	0.442712	0.608017	0.206466	0.641961	0.65885	0.561602	0.656115	0.571614	0.666807	0.593913	0.382409	0.597038	0.498067	0.66203	0.622818	0.673525	0.68754	0.322508
Cell_0036	TFEB_TR	MK-2206 1000 nM	1.05982	0.344151	0.67688	0.895204	1.6528	0.891954	0.501702	1.16236	1.04534	1.9059	0.581546	0.841654	2.48515	1.24028	0.564515	2.04643	1.66805	1.42459	1.4915	1.26806	1.68801	1.24832	1.09531	0.717287	1.61595	0.892031	1.19669	1.4944	1.64436	2.37899	0.929126	1.07729	0.642246	2.29986	2.10371	1.85167	1.79718	0.43271	2.15671	1.20549	2.00914	0.641965	1.31351	1.51768	1.08491	2.02133	0.842492
Cell_0036	FOXO_TR	MK-2206 1000 nM	0.868178	0.821028	0.688025	0.68117	1.46487	1.20481	0.691354	0.676682	1.24816	1.09326	0.919241	0.796569	2.49787	1.08531	0.996521	2.90533	0.833489	1.19305	2.64219	0.660601	1.20926	2.14219	0.897385	1.57736	3.21165	0.707372	1.11508	1.16376	0.829992	0.985774	1.24891	1.00236	0.827787	1.38552	1.11376	1.37635	1.64682	0.837083	1.67289	0.681398	1.16948	0.640997	1.26527	3.11128	1.12359	1.69193	1.4781
Cell_0036	AMPKARt2	MK-2206 1000 nM	0.621078	0.706289	0.671504	0.498877	0.47844	0.266064	0.399667	0.479941	0.532857	0.540083	0.632569	0.682534	0.36669	0.434213	0.716343	0.63767	0.673093	0.649639	0.700525	0.644258	0.620314	0.477244	0.667771	0.700293	0.534395	0.646213	0.525768	0.531913	0.623447	0.441504	0.595375	0.256903	0.651791	0.64847	0.562438	0.644084	0.578771	0.699378	0.581432	0.386456	0.557057	0.48566	0.665844	0.631082	0.65855	0.700935	0.345502
Cell_0037	TFEB_TR	MK-2206 1000 nM	0.979892	0.356278	0.610838	0.898477	1.7717	0.922129	0.48879	1.15011	1.17009	1.76623	0.576782	0.661102	2.31888	1.22556	0.566901	1.76894	1.23524	1.59462	1.38853	1.19729	1.63217	1.02816	1.1823	0.709074	1.64473	0.927563	1.16217	0.65509	1.76089	2.28504	1.08524	1.06896	0.690927	2.29202	2.16104	1.96639	1.29214	0.594215	2.16018	1.22303	1.91257	0.45287	1.27484	1.39786	1.17114	2.21669	0.805435
Cell_0037	FOXO_TR	MK-2206 1000 nM	0.891042	0.847944	0.710071	0.687568	1.5349	1.22058	0.66518	0.681607	1.2925	1.11846	0.917098	0.749049	1.70824	1.07464	0.992346	2.74607	0.847887	1.21254	2.59866	0.65833	1.15113	2.29057	0.888632	1.68294	3.06354	0.778734	1.13893	1.45361	0.830276	0.995214	1.29664	0.998328	0.843083	1.3772	1.09075	1.41197	1.9022	0.88786	1.61674	0.700082	1.03964	0.661161	1.28235	2.7769	1.13311	1.67645	1.57289
Cell_0037	AMPKARt2	MK-2206 1000 nM	0.629683	0.701528	0.669113	0.552332	0.406936	0.311704	0.428465	0.489196	0.531292	0.543667	0.678721	0.675095	0.406171	0.427061	0.721623	0.622483	0.669148	0.648521	0.707611	0.623549	0.619839	0.472232	0.664345	0.71451	0.509783	0.651436	0.515989	0.697078	0.632038	0.460265	0.576984	0.195804	0.650768	0.647818	0.602209	0.654442	0.589536	0.69262	0.563658	0.381638	0.520949	0.474597	0.666335	0.625004	0.671659	0.686088	0.337788
Cell_0038	TFEB_TR	MK-2206 1000 nM	1.01475	0.393936	0.666538	0.907859	1.8906	0.911459	0.541313	1.15248	0.968904	1.78467	0.554718	0.79018	2.13613	1.28401	0.545778	1.99804	1.11191	1.54143	1.22082	1.22032	1.60081	1.17986	1.21999	0.787719	1.62063	0.965982	1.13059	3.17973	1.4066	1.79153	1.24136	1.2574	0.619126	2.48142	2.09079	1.79244	1.87814	0.476292	2.18166	1.33905	1.85856	0.662517	1.45655	1.54836	1.0788	2.17457	0.735435
Cell_0038	FOXO_TR	MK-2206 1000 nM	0.874891	0.830996	0.739305	0.696332	1.60492	1.22351	0.601389	0.680293	1.08804	1.0297	0.929128	0.751382	1.27512	1.09671	1.00042	2.69966	0.814024	1.16713	2.77185	0.668736	1.16817	2.45413	0.908331	1.71875	2.97945	0.758595	1.17375	1.60595	0.834228	0.79346	1.34437	1.00346	0.873368	1.4214	1.068	1.36899	1.46713	0.929755	1.64207	0.7952	1.02114	0.662494	1.23945	2.17596	1.12035	1.72504	1.38046
Cell_0038	AMPKARt2	MK-2206 1000 nM	0.623682	0.71255	0.668451	0.522962	0.335431	0.29501	0.422356	0.480054	0.54681	0.544485	0.63399	0.679709	0.419524	0.396465	0.703009	0.634842	0.663011	0.639126	0.706718	0.64533	0.617029	0.500826	0.652699	0.710093	0.536377	0.666844	0.535101	0.615812	0.602499	0.427941	0.558592	0.203211	0.642132	0.634528	0.614113	0.653889	0.532933	0.683917	0.569483	0.350964	0.529487	0.431872	0.658994	0.658636	0.684718	0.701775	0.367723
Cell_0039	TFEB_TR	MK-2206 1000 nM	0.967457	0.376782	0.652267	0.916814	2.46533	0.965718	0.425827	1.14056	0.979978	1.69884	0.535303	0.607117	1.69121	1.26696	0.569138	1.96629	0.995815	1.62774	0.923429	1.15799	1.61044	1.446	1.02498	0.966807	1.60625	0.966278	1.16812	1.0167	1.29546	2.017	1.16384	1.79256	0.622891	2.33335	2.05918	1.71965	1.86822	0.665618	2.14684	1.55061	1.90605	0.510173	1.4982	1.50211	1.0399	2.15834	0.760245
Cell_0039	FOXO_TR	MK-2206 1000 nM	0.869533	0.837124	0.73048	0.700826	1.73832	1.20103	0.617976	0.680859	1.15642	1.08844	0.919367	0.766981	0.976928	1.1064	1.0178	2.94555	0.820142	1.15949	2.8004	0.646292	1.20635	2.54638	0.900184	1.80116	2.91506	0.741813	1.16135	1.69671	0.87441	0.940549	1.37362	1.00156	0.83257	1.43796	1.08041	1.34389	1.48134	0.95736	1.56701	1.09107	0.999477	0.64186	1.29706	1.56528	1.05738	1.74702	1.23089
Cell_0039	AMPKARt2	MK-2206 1000 nM	0.609214	0.692685	0.658349	0.533072	0.310365	0.276253	0.434805	0.47595	0.515297	0.561316	0.67909	0.663878	0.481567	0.408361	0.711483	0.638792	0.683077	0.610959	0.717467	0.6611	0.594631	0.513218	0.665353	0.706543	0.542707	0.627206	0.53308	0.615848	0.611908	0.448854	0.578927	0.234768	0.624739	0.635838	0.614907	0.672437	0.543842	0.680057	0.563686	0.337088	0.536487	0.443315	0.668961	0.654483	0.66173	0.683149	0.354294
Cell_0040	TFEB_TR	MK-2206 1000 nM	0.922441	0.365383	0.706617	0.888275	1.46543	0.916424	0.313564	1.15913	1.00783	1.6968	0.537609	0.527333	1.35567	1.24261	0.559243	1.66459	1.01437	1.6271	1.34136	1.0396	1.62915	1.33587	1.08317	0.892448	1.60128	0.99541	1.01922	1.77466	1.43451	1.82732	1.20112	1.5407	0.741655	2.30676	2.12891	1.87849	1.8583	0.640749	1.48762	1.34578	1.90882	0.587682	1.73448	1.62223	1.04701	2.17094	0.673435
Cell_0040	FOXO_TR	MK-2206 1000 nM	0.883503	0.833079	0.731366	0.69066	1.55228	1.20956	0.624131	0.700149	1.14549	1.07773	0.906946	0.761144	0.834411	1.07344	1.05425	2.84975	0.806566	1.16667	2.81689	0.64595	1.21473	2.35121	0.950841	1.7758	2.9871	0.783309	1.13088	1.8049	0.817715	0.913287	1.43357	1.01565	0.879936	1.44674	1.08327	1.33731	1.49555	0.926929	1.55831	0.775597	1.01158	0.668801	1.32078	1.28077	1.09347	1.77924	1.21747
Cell_0040	AMPKARt2	MK-2206 1000 nM	0.608313	0.721151	0.681644	0.561994	0.391809	0.279817	0.450356	0.52213	0.523441	0.586118	0.645364	0.698276	0.49319	0.408499	0.726713	0.603365	0.661793	0.611107	0.721717	0.675099	0.631792	0.545009	0.658757	0.698069	0.521046	0.626094	0.539979	0.632957	0.587653	0.436215	0.558356	0.210015	0.644637	0.635402	0.627082	0.651713	0.554751	0.679403	0.584828	0.345347	0.536931	0.437026	0.684661	0.644213	0.670811	0.68873	0.41066
Cell_0041	TFEB_TR	MK-2206 1000 nM	0.923958	0.361005	0.725767	0.889705	1.46676	0.932294	0.645767	1.1847	1.18686	1.65744	0.572235	0.554545	1.29472	1.25686	0.56436	1.88965	1.4261	1.53204	1.36797	1.086	1.7225	1.03135	1.17062	0.986385	1.67586	1.02378	0.940081	2.24994	1.61687	1.93683	2.68239	2.13509	0.657111	2.05748	2.05015	1.68114	1.98524	0.615881	1.60132	1.26707	1.93991	0.711632		1.22617	1.07124	2.28281	0.813818
Cell_0041	FOXO_TR	MK-2206 1000 nM	0.883428	0.855605	0.743813	0.689431	1.5391	1.2289	0.613444	0.70123	1.26558	1.06084	0.918389	0.768514	0.861081	1.06432	1.03604	1.9749	0.792039	1.19352	2.81353	0.647831	1.32565	2.20879	0.906509	1.73283	3.05183	0.885369	1.24732	1.91906	0.851604	0.955471	2.40281	1.02083	0.859117	1.48472	1.05048	1.29998	1.46399	0.896499	1.58442	0.715684	0.995606	0.662351		1.08848	1.11846	1.69061	1.34245
Cell_0041	AMPKARt2	MK-2206 1000 nM	0.61339	0.731902	0.658628	0.555347	0.317397	0.336883	0.428446	0.491359	0.485974	0.562634	0.655018	0.660233	0.506785	0.411757	0.705932	0.645876	0.666674	0.619983	0.69723	0.67763	0.56277	0.551088	0.637555	0.700407	0.486788	0.618483	0.550727	0.628504	0.614553	0.445786	0.495338	0.220532	0.645497	0.635286	0.62179	0.65018	0.520965	0.678748	0.603756	0.33617	0.518502	0.414617		0.628284	0.688204	0.70357	0.246564
Cell_0042	TFEB_TR	MK-2206 1000 nM	0.87355	0.348624	0.733429	0.882227	1.67009	0.967711	0.906714	1.22345	1.20697	1.53984	0.553049	0.709473	1.32777	1.30559	0.573052	1.60296	1.23029	1.43928	1.39484	1.05123	1.68926	1.25293	1.11495	0.910171	1.79609	1.1007	1.03756	6.00773	1.21188	2.01222	2.53459	2.72947	0.594068	2.02803	1.98383	1.53476	2.06191	0.590323	1.80731	1.2122	1.76672	0.971876		1.31382	1.06192	2.34576	0.814947
Cell_0042	FOXO_TR	MK-2206 1000 nM	0.904458	0.812213	0.760555	0.689512	1.56234	1.19673	0.649711	0.708618	1.28659	1.00382	0.993586	0.807728	0.897662	1.08616	1.09955	1.52786	0.81874	1.18984	2.85113	0.638809	1.30278	2.01454	0.913345	1.68665	3.02793	0.910809	1.19365	2.0474	0.817959	0.981363	2.25579	1.02601	0.87332	1.51522	1.0472	1.27434	1.49942	0.922005	1.56953	0.63179	0.960747	0.714107		0.941168	1.08836	1.64982	1.2767
Cell_0042	AMPKARt2	MK-2206 1000 nM	0.625496	0.706037	0.660925	0.547147	0.26016	0.276722	0.468615	0.509373	0.536677	0.553302	0.626341	0.654989	0.501832	0.406413	0.722772	0.65898	0.667745	0.63848	0.708312	0.661837	0.594079	0.531678	0.656319	0.698298	0.514401	0.635283	0.54402	0.643353	0.621334	0.454243	0.468366	0.231049	0.66006	0.624468	0.609456	0.656774	0.559706	0.694394	0.579784	0.32495	0.512503	0.484379		0.626967	0.68457	0.678499	0.279019
Cell_0043	TFEB_TR	MK-2206 1000 nM	0.953527	0.358127	0.714591	0.912709	1.53421	1.06133	0.601969	1.24031	1.01193	1.63279	0.526655	0.630825	1.32022	1.34488	0.58396	1.3587	1.14578	1.50559	1.65856	1.05874	1.62637	1.22756	1.05327	0.987215	1.7828	1.04415	1.19466	4.02788	1.3811	2.0661	2.63617	3.11734	0.585099	1.89937	2.15104	1.37052	1.93934	1.20388	1.94532	1.23633	1.77243	0.730016		1.24108	0.999614	2.18116	0.918674
Cell_0043	FOXO_TR	MK-2206 1000 nM	0.898659	0.795141	0.788087	0.716419	1.48556	1.164	0.613362	0.727789	1.272	1.03104	0.949632	0.812064	0.859315	1.09535	1.08355	1.33676	0.789328	1.22911	2.64373	0.645465	1.27437	1.88953	0.939478	1.69039	2.85727	0.928184	1.13967	2.04475	0.829976	0.975344	2.34006	1.05637	0.818515	1.45334	1.05054	1.31615	1.51904	1.01532	1.6344	0.666647	0.955658	0.724195		0.897168	1.0575	1.6203	1.214
Cell_0043	AMPKARt2	MK-2206 1000 nM	0.616799	0.703951	0.677502	0.48318	0.332524	0.263195	0.423222	0.471289	0.525847	0.578747	0.654692	0.652022	0.48148	0.373076	0.717058	0.657242	0.659891	0.625015	0.699245	0.675079	0.587275	0.567771	0.654039	0.691962	0.518451	0.639702	0.514506	0.622089	0.609863	0.44296	0.464412	0.172568	0.626503	0.625769	0.613974	0.666123	0.560298	0.69301	0.583672	0.320401	0.523946	0.476014		0.615805	0.682583	0.694197	0.283669
Cell_0044	TFEB_TR	MK-2206 1000 nM	0.982777	0.353387	1.5657	0.857486	1.92385	1.13274	0.764016	1.31759	1.1887	1.28355	0.519063	0.615636	1.37562	1.35142	0.622491	1.10075	1.08569	1.75407	1.11347	1.10462	1.61451	1.35758	1.05625	1.27454	1.83073	0.981756	1.06602	1.687	1.21777	1.90423	2.49808	2.92782	0.643189	2.05712	2.1773	1.54856	2.0208	0.555045	1.77748	1.20814	1.85683	0.723774		1.27492	1.06356	2.31716	0.887248
Cell_0044	FOXO_TR	MK-2206 1000 nM	0.881587	0.797099	2.81994	0.679379	1.52115	1.19823	0.624098	0.733559	1.41117	0.915205	0.974979	0.806266	0.894095	1.07428	1.14596	1.22388	0.757818	1.19843	2.64036	0.633952	1.23743	1.99203	0.97002	1.69107	2.91264	0.883947	1.2699	2.11241	0.871224	0.880894	2.55379	1.07748	0.893054	1.48597	1.04298	1.30744	1.46353	0.888256	1.6995	0.723759	0.933146	0.770394		0.89396	1.0498	1.56753	1.11781
Cell_0044	AMPKARt2	MK-2206 1000 nM	0.639192	0.736	0.645207	0.56067	0.36067	0.232461	0.436547	0.465719	0.533283	0.575457	0.650845	0.644169	0.480513	0.373495	0.698251	0.655736	0.647675	0.618692	0.667333	0.671062	0.570855	0.549924	0.666797	0.677589	0.507546	0.645936	0.518687	0.633633	0.584879	0.456267	0.462416	0.16677	0.637947	0.630268	0.621087	0.66003	0.553694	0.721803	0.592151	0.335236	0.504081	0.427287		0.60631	0.666295	0.686665	0.266349
Cell_0045	TFEB_TR	MK-2206 1000 nM	1.03284	0.353619	0.997483	0.866435	1.60567	1.23546	0.615373	1.32198	1.02948	1.39366	0.53109	0.708961	1.69244	1.33694	0.624975	1.08412	1.03564	1.53526	1.86983	1.08964	1.64345	1.22277	1.14544	1.2203	1.89849	1.04626	1.12001	1.42016	1.43559	1.99362	2.62956	2.64379	0.541101	1.59347	1.96793	1.60613	1.93031	0.59803	1.87532	1.22206	1.80432	1.1391		1.19819	1.02471	2.24241	0.773729
Cell_0045	FOXO_TR	MK-2206 1000 nM	0.925444	0.812785	2.6719	0.685784	1.50914	1.22821	0.645796	0.729687	1.39518	0.935973	0.989033	0.792887	0.945075	1.09917	1.17352	1.09763	0.780638	1.1867	2.02334	0.637421	1.26629	2.13469	0.958232	1.74027	3.01279	0.868591	1.28219	2.19284	0.843591	0.859502	2.86903	1.12128	0.850634	0.778768	1.02643	1.33621	1.42963	0.875562	1.74303	0.763341	0.939333	0.78565		0.865766	1.00603	1.57714	1.04507
Cell_0045	AMPKARt2	MK-2206 1000 nM	0.63984	0.738676	0.639352	0.548921	0.333432	0.253882	0.441503	0.448241	0.535735	0.583108	0.628079	0.651548	0.4723	0.37819	0.695813	0.64916	0.654805	0.600247	0.690502	0.683716	0.58584	0.567029	0.663009	0.678758	0.473211	0.645491	0.524044	0.656416	0.562366	0.436672	0.460602	0.148964	0.665025	0.370035	0.625482	0.652606	0.540933	0.694605	0.594924	0.308054	0.515295	0.465283		0.59666	0.654278	0.696383	0.344483
Cell_0046	TFEB_TR	MK-2206 1000 nM	0.997041	0.341231	2.38361	0.854982	1.99951	1.26741	0.753786	1.37271	1.1931	1.44172	0.547484	0.834302	1.73924	1.32337	0.651671	1.09175	1.10837	1.77538	1.19022	1.01522	1.71415	1.36259	0.927722	1.38546	2.01017	1.13949	1.15152	3.33513	1.32838	1.94331	2.47275	2.54914	0.61305	1.66896	2.10761	1.56137	1.93437	0.485809	2.03136	1.22638	1.7141	0.903147		1.21758	0.963618	2.4473	0.627714
Cell_0046	FOXO_TR	MK-2206 1000 nM	0.945547	0.807193	2.72711	0.688027	1.39391	1.29877	0.609252	0.722005	1.59052	0.922657	0.999998	0.814984	0.980724	1.10016	1.17265	1.06482	0.781886	1.17604	1.62372	0.635578	1.30394	2.22802	0.988883	1.77112	3.10518	0.871972	1.25272	2.29467	0.848643	0.865813	2.94333	1.11606	0.859866	0.768455	1.04419	1.35489	1.45253	0.988681	1.63425	0.758392	0.917135	0.813022		0.869751	0.989842	1.60666	1.08199
Cell_0046	AMPKARt2	MK-2206 1000 nM	0.626733	0.72926	0.641654	0.543709	0.26646	0.212652	0.438116	0.468181	0.524137	0.577346	0.636323	0.654498	0.467695	0.369041	0.720106	0.655412	0.647055	0.614268	0.682134	0.682722	0.587743	0.560017	0.651528	0.670834	0.438659	0.625204	0.541727	0.65134	0.565846	0.419638	0.440296	0.189689	0.638226	0.348112	0.624483	0.668351	0.555837	0.746707	0.581816	0.305677	0.521635	0.424841		0.616941	0.662273	0.690743	0.394923
Cell_0047	TFEB_TR	MK-2206 1000 nM	1.02625	0.363805	1.54764	0.822466	1.43756	1.31561	0.49583	1.37814	1.08336	1.31529	0.518876	0.580737	1.91173	1.27893	0.654416	1.22866	0.770558	1.65335	1.10386	1.13303	1.76803	1.75329	0.922285	1.2055	2.09593	1.34721	1.34173	5.25011	1.36844	1.99444	2.79479	2.7524	0.661182	1.59238	2.27106	1.58962	2.07737	0.445094	1.68364	1.16655	1.64755	1.41524		1.17018	0.97597	2.37449	0.630659
Cell_0047	FOXO_TR	MK-2206 1000 nM	0.937619	0.872281	2.62686	0.668206	1.42999	1.25448	0.629389	0.74727	1.50141	0.951439	1.00087	0.816846	1.02956	1.07604	1.1552	1.09081	0.802721	1.18765	1.37977	0.623045	1.30667	2.21152	0.93924	1.65203	3.17427	1.15685	1.18601	2.3965	0.876584	0.882878	2.74099	1.0271	0.887146	0.768809	1.06833	1.35323	1.57356	1.01394	1.63354	0.758911	0.954276	0.856288		0.791023	1.03173	1.66871	1.03391
Cell_0047	AMPKARt2	MK-2206 1000 nM	0.61372	0.743339	0.636017	0.558188	0.304128	0.211576	0.445806	0.498645	0.5398	0.585746	0.632418	0.668059	0.457134	0.368815	0.715815	0.659035	0.681037	0.617207	0.679407	0.685568	0.58842	0.545706	0.654176	0.668801	0.475837	0.643085	0.490532	0.646264	0.582264	0.423149	0.472279	0.287436	0.633141	0.367244	0.624767	0.662926	0.575824	0.70778	0.611933	0.300766	0.534479	0.436853		0.598495	0.659605	0.685728	0.417525
Cell_0048	TFEB_TR	MK-2206 1000 nM	1.0741	0.363489	1.58869	0.839399	1.65174	1.51736	0.596185	1.35301	1.114	1.23447	0.521092	0.859734	1.9332	1.26037	0.639558	1.03317	0.94175	1.75042	1.75614	1.141	1.79441	1.8461	0.91858	1.30291	2.01656	1.14072	1.39779	4.39974	1.83235	1.85528	3.5182	1.97191	0.590853	1.63175	1.98183	1.67181	1.95931	0.977348	1.84202		1.55383	1.4272		1.09377	0.924341	2.19863	0.744669
Cell_0048	FOXO_TR	MK-2206 1000 nM	0.970112	0.866083	2.6507	0.672212	1.47317	1.44435	0.607593	0.73647	1.55227	0.960338	0.993759	0.865441	1.00894	1.11279	1.17366	1.05112	0.79208	1.1952	1.19644	0.61773	1.39558	1.98068	0.960054	1.7732	2.9218	0.931094	1.17996	2.49657	0.955343	0.873744	2.61485	1.10754	0.849949	0.786096	1.09942	1.36147	1.55268	1.02978	1.6535		0.938289	0.826386		0.788531	1.0028	1.64292	1.12914
Cell_0048	AMPKARt2	MK-2206 1000 nM	0.612694	0.740092	0.615082	0.546801	0.296455	0.497357	0.430314	0.471824	0.504785	0.593592	0.652055	0.638208	0.472351	0.36674	0.725731	0.659464	0.679131	0.633427	0.69327	0.672925	0.583787	0.550014	0.633616	0.673254	0.431665	0.613658	0.503293	0.620936	0.57742	0.453396	0.488724	0.290772	0.634848	0.377719	0.616284	0.655034	0.555318	0.714041	0.601852		0.525601	0.423928		0.609726	0.667467	0.681985	0.412411
Cell_0049	TFEB_TR	MK-2206 1000 nM	0.974833	0.362843	1.63237	0.832241	1.63652	1.47002	0.668649	1.31474	1.40403	1.32579	0.520458	0.909001	1.82341	1.35772	0.604062	1.18514	1.16781	1.82366	1.67215	1.0976	1.75563	1.57895	0.962808	1.28649	2.13563	1.24096	1.34316	0.817005	2.09229	1.62894	3.6227	1.95129	0.637118	1.47839	2.10783	1.43385	0.826516	0.694736	1.694		1.4484	1.03873		1.15101	0.950065	2.45446	0.668876
Cell_0049	FOXO_TR	MK-2206 1000 nM	0.969757	0.897998	2.65539	0.673861	1.42967	1.27742	0.643699	0.742282	1.6223	1.05413	1.03453	0.86808	0.991688	1.14757	1.10221	1.01765	0.830087	1.22367	1.07	0.623305	1.37294	1.57982	1.05329	1.80327	3.01082	1.06863	1.18782	2.27322	1.05393	0.817143	2.39012	1.08427	0.910659	0.780462	1.10355	1.35197	2.01946	1.06738	1.66267		0.879113	0.857993		0.773733	1.01469	1.62991	1.05963
Cell_0049	AMPKARt2	MK-2206 1000 nM	0.614443	0.734342	0.628794	0.556432	0.371484	0.507808	0.44868	0.473241	0.529741	0.594806	0.617161	0.641116	0.457056	0.363516	0.720683	0.648976	0.661262	0.589389	0.691109	0.673998	0.596919	0.6064	0.655125	0.684632	0.456129	0.603359	0.529742	0.650282	0.566721	0.438451	0.534968	0.213613	0.640339	0.37347	0.590419	0.674872	0.540319	0.683973	0.597516		0.503122	0.44659		0.618691	0.687201	0.672552	0.380064
Cell_0050	TFEB_TR	MK-2206 1000 nM	0.940133	0.357474	1.7382	0.835701	1.44343	1.45469	0.583766	1.29942	1.33498	1.40459	0.506175	0.794536	1.77147	1.43173	0.638107	1.08093	0.914626	1.98458	1.42285	1.17511	1.75605	1.10383	0.793311	1.16871	2.22411	0.931423	1.30726	1.78995	1.58592	1.62079	3.62025	1.51168	0.624578	1.45576	2.2733	1.47983	0.797831	0.457277	1.73907		1.39599	1.8638		1.16126	0.963643	2.31763	0.756443
Cell_0050	FOXO_TR	MK-2206 1000 nM	0.965008	0.896544	2.76552	0.680028	1.40657	1.17569	0.645464	0.740382	1.63027	0.998094	0.987103	0.859273	0.954465	1.22649	1.13991	0.981427	0.828886	1.24444	1.02778	0.623889	1.44956	1.24563	1.01124	1.75733	3.08025	0.8627	1.17722	2.35531	1.01741	0.844301	2.25491	1.06025	0.908182	0.796266	1.11943	1.3719	2.01458	0.994352	1.65559		0.899133	0.865947		0.776256	1.03346	1.58533	0.912291
Cell_0050	AMPKARt2	MK-2206 1000 nM	0.633785	0.735151	0.643475	0.566544	0.243163	0.496852	0.456753	0.472568	0.462529	0.589283	0.632545	0.652286	0.450928	0.376795	0.722103	0.669076	0.637541	0.592519	0.715958	0.680874	0.561036	0.584504	0.621365	0.667223	0.447975	0.632933	0.498739	0.686598	0.567586	0.432062	0.545057	0.284926	0.634736	0.373577	0.559346	0.648181	0.527623	0.700722	0.599855		0.520707	0.458317		0.622062	0.680699	0.673764	0.368762
Cell_0051	TFEB_TR	MK-2206 1000 nM	1.0544	0.349101	1.73784	0.83209	1.58931	1.43376	0.526481	1.29787	1.14218	1.25011	0.492972	0.946426	1.74377	1.54722	0.609136	0.954469	1.01695	1.9579	2.35753	1.14637	1.65575	1.38037	0.810572	1.20335	2.25915	1.11348	1.40061	3.2201	1.5396	1.70193	4.51973	1.34562	0.638632	1.54121	2.56352	1.68881	0.790417	0.476747	1.83208		1.50328	1.18715		0.931957	0.920729	2.32525	0.740678
Cell_0051	FOXO_TR	MK-2206 1000 nM	0.947451	0.925386	2.6749	0.690132	1.42685	1.13646	0.633933	0.75183	1.5578	0.9573	0.985917	0.84447	0.950651	1.29713	1.09885	1.02444	0.838742	1.23441	0.988574	0.638979	1.34273	1.08207	0.973413	1.75759	3.08919	0.901767	1.17911	2.34773	1.02302	0.886647	2.24328	1.04394	0.91145	0.795746	1.20203	1.36559	2.131	1.01916	1.59411		0.938424	0.915364		0.78855	1.03132	1.58409	0.953896
Cell_0051	AMPKARt2	MK-2206 1000 nM	0.610395	0.702689	0.629993	0.554663	0.275468	0.478428	0.419081	0.470895	0.504741	0.602052	0.624237	0.662737	0.443423	0.371816	0.732159	0.681137	0.662635	0.56566	0.711234	0.666792	0.575031	0.57667	0.617487	0.680626	0.45494	0.647597	0.514883	0.633335	0.55414	0.448611	0.534109	0.349084	0.645358	0.376266	0.552725	0.6583	0.503433	0.71157	0.571865		0.505359	0.437649		0.620423	0.688635	0.67154	0.365566
Cell_0052	TFEB_TR	MK-2206 1000 nM	1.03464	0.370315	1.80685	0.842801	2.22408	1.42225	0.617555	1.28552	2.07829	1.31689	0.480586	0.748636	1.58265	1.45968	0.613568	1.00545	0.868264	2.01188	0.949819	1.23234	1.81262	1.40084	1.00513	1.09255	2.30295	1.18664	1.45367	1.58469	1.6533	2.00441	4.79419	1.35799	0.587866	1.48954	2.34208	1.75416	0.881228	0.576084	1.63673		1.4565	1.99066		1.03531	0.971832	2.30615	0.777414
Cell_0052	FOXO_TR	MK-2206 1000 nM	0.940761	0.92098	2.64567	0.691343	1.56001	1.19106	0.677507	0.753917	1.29299	0.947502	0.96672	0.843606	0.941593	1.25467	1.14257	1.01462	0.845582	1.27055	0.967312	0.670382	1.49267	0.990113	1.00262	1.74824	3.06581	0.950433	1.24349	2.3921	1.00802	0.99767	2.34168	1.04344	0.922285	0.793336	1.11199	1.34969	2.23454	0.949161	1.61842		0.929104	0.921702		0.791225	1.05054	1.55388	0.975114
Cell_0052	AMPKARt2	MK-2206 1000 nM	0.627099	0.732175	0.62005	0.578124	0.293021	0.494226	0.426664	0.483685	0.562852	0.604281	0.639246	0.637631	0.44476	0.372133	0.719016	0.67275	0.665882	0.599725	0.695389	0.684437	0.536472	0.576421	0.639458	0.688091	0.49313	0.61643	0.467141	0.670391	0.578545	0.447143	0.551496	0.357442	0.615228	0.376701	0.481998	0.660336	0.495059	0.68364	0.580756		0.496483	0.458702		0.624209	0.695367	0.666868	0.37033
Cell_0053	TFEB_TR	MK-2206 1000 nM	0.985891	0.358629	1.93389	0.832166	1.41671	1.42466	0.382226	1.27487	1.96462	1.37325	0.507495	0.724719	1.49562	1.52599	0.590775	0.955627	1.26443	1.98855	1.84005	1.2795	1.77545	1.42948	1.14691	1.07893	2.1921	1.25979	1.50542	2.2726	1.7102	1.91301	4.39405	1.21767	0.636904	1.59356	2.31792	1.78941	0.888245	0.499141	1.60505	1.41366	1.53744	1.20817		1.16339	0.910292	2.45542	0.675946
Cell_0053	FOXO_TR	MK-2206 1000 nM	0.94929	0.940987	2.69932	0.6838	1.36765	1.24131	0.65084	0.780398	1.33259	0.96646	0.966677	0.869857	0.925967	1.29938	1.12175	1.02496	0.816235	1.24021	0.991777	0.677999	1.47509	0.985253	1.00962	1.73247	2.26757	0.9991	1.18874	2.47797	0.94578	0.986049	2.2651	1.01811	0.943202	0.793408	1.15588	1.42351	2.16217	0.871047	1.58168	2.97762	0.929255	0.894807		0.809609	1.03618	1.58159	0.862606
Cell_0053	AMPKARt2	MK-2206 1000 nM	0.636811	0.727225	0.612718	0.571021	0.256499	0.472547	0.443328	0.478907	0.550832	0.602224	0.625856	0.639071	0.416274	0.409233	0.704311	0.679014	0.643099	0.584672	0.706687	0.681043	0.571799	0.552508	0.65371	0.677837	0.536356	0.585262	0.461846	0.660995	0.580035	0.425778	0.536583	0.356176	0.644414	0.364257	0.421768	0.674279	0.502563	0.70285	0.603049	0.697425	0.471627	0.454356		0.629955	0.675343	0.667465	0.366245
Cell_0054	TFEB_TR	MK-2206 1000 nM	1.06378	0.34465	1.99338	0.82244	1.47562	1.48663	0.762368	1.26136	1.93181	1.35532	0.503108	0.863956	1.37683	1.37339	0.618208	1.00693	1.19177	2.09836	0.854035	1.38215	1.78001	1.3723	0.93718	1.09828	2.00913	1.47037	1.55209	2.41012	1.50996	1.92515	4.8195	1.15503	0.730362	1.42599	2.70753	1.6346	0.972937	0.508162	1.47038	1.57351	1.49749	1.26532		0.99508	0.916296	2.46791	0.772669
Cell_0054	FOXO_TR	MK-2206 1000 nM	0.970993	0.929414	2.75843	0.675879	1.34021	1.3714	0.635403	0.783018	1.34343	1.00745	0.924072	0.900126	0.913609	1.25395	1.1947	1.00849	0.863239	1.23383	0.948763	0.709279	1.50026	0.952277	1.01128	1.75739	1.70436	1.14029	1.21757	2.41838	0.949049	1.03383	2.30308	0.986938	0.955751	0.795421	1.22418	1.37418	2.31318	0.856113	1.6195	3.01316	0.88506	0.856798		0.781144	1.08114	1.58266	0.843936
Cell_0054	AMPKARt2	MK-2206 1000 nM	0.631167	0.716582	0.629274	0.587539	0.3505	0.465702	0.382253	0.463122	0.552249	0.615362	0.608185	0.641212	0.432293	0.528667	0.748145	0.667018	0.650381	0.608354	0.721139	0.676221	0.55335	0.511041	0.635839	0.680712	0.552102	0.593628	0.448887	0.662391	0.618514	0.432304	0.527386	0.354679	0.62102	0.329463	0.481482	0.655421	0.469156	0.70477	0.612135	0.708756	0.479682	0.477814		0.626468	0.681854	0.647087	0.405877
Cell_0055	TFEB_TR	MK-2206 1000 nM	1.03066	0.340321	2.10373	0.830541	1.82264	1.48362	0.535102	1.16333	2.01005	1.18058	0.506845	0.91877	1.44191	1.22666	0.602792	0.89898	0.939836	1.88034	1.03356	1.38646	1.7722	1.00588	1.00671	1.09276	1.88708	1.13584	1.53109	2.63225	1.96258	2.01934	4.89301	1.21747	0.694777	1.43413	2.68458	1.89222	1.02276	0.450379	1.47322	1.43703	1.48579	1.57648		0.805544	0.872056	2.30541	0.69208
Cell_0055	FOXO_TR	MK-2206 1000 nM	0.972122	0.933298	2.88502	0.694477	1.37623	1.51918	0.65638	0.76203	1.33383	0.963934	0.973366	0.952674	0.937569	1.26823	1.13095	1.01398	0.840109	1.26634	0.930254	0.726643	1.53777	0.945848	1.02616	1.73748	1.39521	0.965485	1.20269	2.45774	0.981105	1.08608	2.44633	0.981026	0.916251	0.790214	1.25046	1.38816	2.47892	0.846816	1.54151	3.10615	0.922628	0.86808		0.755577	0.92482	1.55278	0.886916
Cell_0055	AMPKARt2	MK-2206 1000 nM	0.621292	0.706509	0.629079	0.563419	0.286504	0.496865	0.425498	0.451974	0.542544	0.610509	0.614352	0.652535	0.433829	0.533477	0.731225	0.669712	0.645047	0.619906	0.71558	0.654608	0.541236	0.554217	0.63797	0.685472	0.537497	0.6135	0.46689	0.667968	0.617449	0.422181	0.543762	0.362404	0.640107	0.385441	0.502492	0.643883	0.473868	0.725667	0.601756	0.677603	0.470255	0.474539		0.636225	0.679417	0.630887	0.42399
Cell_0056	TFEB_TR	MK-2206 1000 nM	1.05916	0.343001	2.14335	0.829221	2.0556	1.43596	0.621611	1.17571	1.83225	1.21595	0.500857	0.77388	1.44507	1.03816	0.590164	0.872415	2.33208	1.85368	1.04966	1.3946	1.65902	1.46754	1.05229	1.18336	1.77385	1.01166	1.59488	2.67824	1.99087	2.06914	4.74655	1.18942	0.685581	1.63125	2.24618	1.74765	1.14772	0.544047	1.84848	1.25065	1.43147	1.27243		0.869161	0.868412	2.87538	0.74144
Cell_0056	FOXO_TR	MK-2206 1000 nM	0.974833	0.930385	2.89795	0.69065	1.70104	1.65188	0.660536	0.786168	1.29569	0.984096	0.972355	1.51313	0.922738	1.22647	1.11528	0.981039	0.87141	1.25452	0.91493	0.733819	1.37675	0.922198	1.02543	1.84626	1.17116	0.966737	1.18716	2.54657	0.999377	1.12724	2.64505	1.00649	0.94594	0.820181	1.29438	1.36098	2.49503	0.855938	1.68692	3.23426	0.915987	0.864085		0.731677	0.917601	1.58186	0.879062
Cell_0056	AMPKARt2	MK-2206 1000 nM	0.623286	0.721118	0.630171	0.556299	0.172943	0.4755	0.457442	0.469451	0.543697	0.602559	0.623181	0.606922	0.424969	0.507033	0.730952	0.658702	0.647238	0.601552	0.699807	0.677336	0.567207	0.53998	0.639124	0.694905	0.555934	0.635224	0.431393	0.667613	0.631036	0.476117	0.533163	0.395032	0.649601	0.339951	0.612116	0.664368	0.432931	0.708892	0.601533	0.685625	0.477402	0.4653		0.620079	0.65967	0.648883	0.434747
Cell_0057	TFEB_TR	MK-2206 1000 nM	1.00149	0.358344	2.36353	0.837615	2.99272	1.51947	0.526776	1.24923	1.97464	1.17448	0.483104	0.763926	1.46557	0.929892	0.597419	0.963459	2.76417	1.83516	0.929345	1.4102	1.74815	1.57283	0.923224	1.1929	1.61395	1.04021	1.80079	1.99678	2.33684	2.09537	4.16929	1.13961	0.602278	1.49593	2.09353	1.68744	1.20742	0.549968	2.06135	1.47341	1.51929	1.23482	1.38573	0.928379	0.935003	2.73466	0.717271
Cell_0057	FOXO_TR	MK-2206 1000 nM	0.973083	0.960398	3.01026	0.691457	2.02336	1.55153	0.663112	0.811221	1.34438	0.959045	1.00412	1.39394	0.914309	1.18251	1.12	1.01367	0.864008	1.19988	0.890063	0.748813	1.4826	0.8974	0.997466	1.8286	1.07771	0.963558	1.14948	2.10219	0.981232	1.12078	2.95623	0.987778	0.92135	0.834811	1.23773	1.38873	2.52761	0.887523	1.93898	3.1454	0.95509	0.851181	3.46239	0.765664	0.9221	1.61954	0.865408
Cell_0057	AMPKARt2	MK-2206 1000 nM	0.628743	0.740143	0.64126	0.531612	0.203171	0.473265	0.425051	0.47143	0.547786	0.620008	0.63623	0.575059	0.446876	0.517448	0.730543	0.679879	0.638471	0.595321	0.710188	0.679827	0.555104	0.563227	0.61542	0.683838	0.566821	0.57843	0.346899	0.679542	0.626758	0.475857	0.607017	0.414395	0.649967	0.32726	0.58694	0.683539	0.440164	0.719458	0.578194	0.684145	0.500367	0.458705	0.589396	0.646163	0.665194	0.62585	0.427284
Cell_0058	TFEB_TR	MK-2206 1000 nM	1.01094	0.356242	2.25514	0.873893	2.53234	1.56556	0.531672	1.27642	1.82606	1.23791	0.490709	0.689087	1.35148	0.89801	0.620357	0.867154	1.49406	1.57934	1.89633	1.36833	1.6738	1.25896	1.01446	1.16264	1.49861	1.4766	1.72522	0.439179	1.73206	2.06081	0.962319	1.06425	0.673093	1.47158	1.81959	1.86761	1.31921	0.480774	2.07079	1.33545	1.46154	1.37205	1.67204	0.897193	0.952921	2.58454	0.693103
Cell_0058	FOXO_TR	MK-2206 1000 nM	0.985701	0.922964	2.86412	0.711116	2.04011	1.40346	0.672981	0.798659	1.36414	1.03409	0.978554	1.20029	0.881183	1.18784	1.1082	0.989052	0.874105	1.07565	0.858785	0.753318	1.44172	0.890441	1.03576	1.80545	0.967011	1.22877	1.19089	1.75485	0.951771	1.08574	2.98943	0.997734	0.897661	0.834347	1.26955	1.40191	2.69018	0.86911	1.85617	3.33883	0.93481	0.850012	3.74305	0.762602	1.05936	1.61618	0.851753
Cell_0058	AMPKARt2	MK-2206 1000 nM	0.639064	0.720246	0.638435	0.517207	0.187506	0.458451	0.439878	0.482804	0.528841	0.614479	0.619547	0.557015	0.43781	0.52141	0.69377	0.687764	0.640875	0.593071	0.733806	0.701867	0.542484	0.559203	0.645279	0.697519	0.565392	0.600386	0.381419	0.669307	0.621873	0.459123	0.553015	0.362683	0.629384	0.316284	0.604051	0.66982	0.473853	0.708827	0.592034	0.683233	0.469283	0.444698	0.561238	0.636317	0.68927	0.62474	0.419821
Cell_0059	TFEB_TR	MK-2206 1000 nM	1.08352	0.34412	2.59348	0.863778	2.64155	1.54928	0.667889	1.31524	1.83239	1.36592	0.471054	0.671365	1.49073	0.8818	0.649836	0.951315	1.4637	1.67453	1.15076	1.37	1.6388	1.39993	1.00087	1.03173	1.38637	1.29428	1.54831	3.96805	1.69023	2.06753	1.73156	0.988462	0.801085	1.53824	1.90488	2.03037	1.33646	0.446808	2.04051	1.44171	1.58577	1.86462	1.75392	0.847136	1.0682	2.49511	0.792126
Cell_0059	FOXO_TR	MK-2206 1000 nM	0.959338	0.912735	2.88622	0.699553	2.13291	1.34524	0.691592	0.785731	1.34341	1.02474	0.990974	1.11889	0.860546	1.21976	1.20574	0.950932	0.85328	1.10746	0.872145	0.758321	1.47555	0.896128	1.01138	1.80237	0.858486	1.02637	1.1743	1.32741	0.951686	1.03369	3.01568	0.996206	0.958301	0.858307	1.30338	1.37487	2.87005	0.878349	2.0127	3.22864	0.967465	0.891703	3.69259	0.757722	1.14648	1.60815	0.898284
Cell_0059	AMPKARt2	MK-2206 1000 nM	0.609403	0.742431	0.623057	0.506777	0.106834	0.484274	0.494986	0.456148	0.549153	0.622835	0.616669	0.553805	0.443515	0.525704	0.724466	0.686235	0.613816	0.611513	0.727838	0.688211	0.492386	0.58482	0.618058	0.671476	0.54659	0.604524	0.418583	0.675969	0.655429	0.451003	0.556886	0.439026	0.630277	0.30015	0.663642	0.680591	0.455718	0.706605	0.582314	0.689931	0.497243	0.420334	0.543179	0.629261	0.688842	0.60888	0.436489
Cell_0060	TFEB_TR	MK-2206 1000 nM	1.10674	0.348196	2.49832	0.876127	2.20381	1.65591	0.496825	1.41232	1.89812	1.17873	0.485941	0.675179	1.54457	0.911917	1.01066	0.856207	2.13331	1.7164	0.931991	1.30879	1.62288	1.13592	1.08451	1.06949	1.35364	1.26792	1.53696	3.1267	2.70054	2.03225	8.33392	0.972509	0.815523	1.59267	1.90007	2.19313	1.34951	0.467131	2.00665	1.35486	1.52777	1.84414	1.96688	0.776367	1.02436	2.3356	0.737237
Cell_0060	FOXO_TR	MK-2206 1000 nM	0.972802	0.931699	3.06427	0.713945	1.99806	1.38041	0.709165	0.800241	1.40474	1.04758	1.00784	1.09995	0.919256	1.23365	2.36159	0.942027	0.835138	1.09951	0.862297	0.754189	1.36211	0.888289	1.02623	1.76002	0.820099	1.18869	1.18092	1.2079	0.996745	1.05223	2.70347	0.992459	0.95926	0.852414	1.37148	1.34784	3.08316	0.889774	1.98498	2.34423	0.975098	0.868298	3.43669	0.762312	1.05677	1.64321	0.817272
Cell_0060	AMPKARt2	MK-2206 1000 nM	0.632295	0.730363	0.622906	0.515969	0.179318	0.487195	0.483047	0.450897	0.545762	0.603029	0.594928	0.560189	0.437523	0.555454	0.617879	0.685122	0.639309	0.599132	0.714166	0.724436	0.556428	0.545412	0.622784	0.676008	0.528421	0.669686	0.392909	0.668737	0.66807	0.451167	0.506953	0.430523	0.62132	0.269168	0.667028	0.691363	0.468089	0.705771	0.58364	0.689971	0.480188	0.3995	0.515869	0.641652	0.688241	0.621749	0.467841
Cell_0061	TFEB_TR	MK-2206 1000 nM	1.08565	0.350154	2.5774	0.882604	2.03958	1.66713	0.35757	1.47232	1.88583	1.17125	0.470708	0.682379	1.60004	0.879119	1.0217	0.8476	1.46032	1.67563	1.40421	1.30379	1.5778	1.91322	0.960796	0.991724	1.37631	1.17771	1.53771	0.616942	2.53027	1.86583	4.11079	0.992086	0.745455	1.60747	2.12147	1.85032	1.49365	0.558396	2.47847	1.60069	1.53611	1.58077	1.80906	0.782481	0.980518	0.660815	0.719324
Cell_0061	FOXO_TR	MK-2206 1000 nM	0.954233	0.918344	3.12347	0.716912	2.34531	1.37745	0.692186	0.804852	1.42304	1.02659	0.98247	1.06884	0.863243	1.19506	2.30556	0.938011	0.833072	1.10278	0.858395	0.749179	1.36854	0.900122	1.01511	1.75667	0.821435	1.09565	1.17075	1.19191	0.990178	0.980148	2.10506	1.0027	0.921118	0.843469	1.36084	1.42417	3.10498	0.940532	2.07155	3.06057	0.996064	0.845381	3.33662	0.776155	0.967051	2.8922	0.824906
Cell_0061	AMPKARt2	MK-2206 1000 nM	0.637035	0.710188	0.624129	0.518756	0.21575	0.475651	0.467096	0.472142	0.550792	0.609781	0.604876	0.561264	0.417337	0.56922	0.599708	0.66571	0.604748	0.612139	0.708617	0.723603	0.577122	0.555638	0.621922	0.650787	0.55325	0.616952	0.35821	0.679624	0.666147	0.463723	0.552541	0.430837	0.629219	0.290132	0.657051	0.666569	0.452537	0.701864	0.565174	0.693115	0.487316	0.373796	0.520462	0.63561	0.687641	0.708768	0.421701
Cell_0062	TFEB_TR	MK-2206 1000 nM	1.13019	0.37538	2.89049	0.872516	1.89366	1.75347	0.683498	1.5308	1.79711	1.25638	0.473961	0.716107	1.86269	0.940076	1.11516	0.881391	1.47055	1.64597	0.920706	1.26247	1.60274	1.411	0.993139	1.16045	1.27855	1.45826	1.51481	2.50511	2.07391	1.87947	2.42906	0.882556	0.709476	1.52111	2.14064	2.05415	1.58455	0.63683	2.24368	1.01426	1.5095	1.40535	1.91963	0.86223	0.959025	0.70268	0.701412
Cell_0062	FOXO_TR	MK-2206 1000 nM	0.965369	0.984974	3.15743	0.717727	2.25836	1.33065	0.701573	0.821906	1.4108	1.08243	0.985006	1.08514	0.931994	1.25478	2.23678	0.953625	0.841358	1.09341	0.885384	0.752507	1.42341	0.874407	1.04533	1.88012	0.741056	1.11593	1.14138	1.03032	0.991436	0.895303	1.88174	0.997322	0.953332	0.841828	1.33166	1.53409	2.90802	0.924393	1.95265	2.33065	0.954305	0.822789	3.29263	0.790309	0.999718	3.03333	0.83254
Cell_0062	AMPKARt2	MK-2206 1000 nM	0.607299	0.741122	0.630654	0.547322	0.342261	0.488971	0.483105	0.458376	0.534575	0.62943	0.58339	0.567961	0.42748	0.543842	0.598232	0.656669	0.614579	0.583786	0.714253	0.717917	0.545692	0.554386	0.637956	0.686794	0.561101	0.554181	0.323444	0.695658	0.664121	0.461744	0.572116	0.424836	0.64182	0.306386	0.640779	0.681917	0.497737	0.709946	0.572351	0.669868	0.479365	0.365904	0.519612	0.639003	0.67888	0.716801	0.37556
Cell_0063	TFEB_TR	MK-2206 1000 nM	1.18828	0.351903	3.30309	0.883698	2.70835	1.8223	0.496305	1.60178	1.94256	1.04275	0.466494	0.775802	2.17185	1.00199	0.960906	0.915196	2.15187	1.7607	0.919157	1.38026	1.59934	1.38706	0.943815	0.30451	1.3295	1.04089	1.5214	3.05205	3.22495	1.8754	6.67488	0.91614	0.823874	1.47755	2.1814	1.90361	1.38373	0.510075	2.49966	1.39514	1.50503	3.7159	1.80983	0.947801	0.915322	0.626679	0.631913
Cell_0063	FOXO_TR	MK-2206 1000 nM	0.994776	0.945556	3.12187	0.717758	2.55097	1.30726	0.766918	0.849549	1.46034	1.02799	1.02306	1.11765	1.0237	1.32347	2.0693	1.00235	0.820989	1.07591	0.856254	0.76635	1.30789	0.900598	1.07981	1.8953	0.78744	0.94562	1.23222	0.978565	1.00605	0.99116	1.62106	0.98342	0.958274	0.843205	1.31808	1.42637	2.65793	0.934165	1.9773	2.87531	0.962281	0.812754	3.25228	0.827333	1.02751	3.00568	0.81663
Cell_0063	AMPKARt2	MK-2206 1000 nM	0.604865	0.732177	0.619722	0.521905	0.178239	0.467381	0.53061	0.44256	0.561601	0.618601	0.565579	0.584755	0.462069	0.527225	0.6273	0.688509	0.633212	0.620973	0.699658	0.688451	0.582762	0.587246	0.623774	0.690341	0.540919	0.645096	0.408709	0.695055	0.65528	0.447717	0.563044	0.447889	0.63104	0.297253	0.6472	0.659702	0.496251	0.717881	0.559771	0.720695	0.492173	0.298209	0.554286	0.626276	0.683989	0.702906	0.308982
Cell_0064	TFEB_TR	MK-2206 1000 nM	1.27017	0.332514	3.15903	0.884622	2.71773	1.89482	0.55173	1.67575	1.89448	0.924766	0.49117	0.768264	1.96085	1.04329	1.03838	0.909029	1.44276	1.41466	1.59722	1.29489	1.71255	1.16033	0.918155	1.24193	1.33342	1.22559	1.44833	0.536307	2.03135	2.02677	3.78632	0.923453	0.73451	1.48386	2.08707	1.71106	1.24012	0.618259	2.24418	1.02679	1.49064	2.02986	1.96184	0.908798	1.09705	0.646157	0.635628
Cell_0064	FOXO_TR	MK-2206 1000 nM	1.06034	0.913592	2.47369	0.718105	2.77556	1.37889	0.769638	0.894456	1.50312	1.01741	1.05402	1.16201	0.984813	1.32355	1.90569	1.03115	0.821452	2.46225	0.864388	0.770865	1.46566	0.893752	1.10414	1.98147	0.782772	0.947499	1.18138	0.915296	1.0206	1.0478	1.44489	1.04093	0.999375	0.895425	1.38894	1.36307	2.50426	0.950799	1.91247	2.84272	0.995903	0.77049	3.12768	0.821879	1.07378	3.15018	0.805455
Cell_0064	AMPKARt2	MK-2206 1000 nM	0.612154	0.710746	0.665794	0.498125	0.20902	0.483394	0.493049	0.470415	0.544005	0.614102	0.611258	0.56972	0.443254	0.541929	0.641583	0.679282	0.634787	0.539401	0.712601	0.690948	0.517824	0.545988	0.643914	0.701787	0.549119	0.586537	0.433778	0.706148	0.668911	0.470893	0.554442	0.457954	0.637297	0.234536	0.609757	0.653463	0.495205	0.722401	0.596835	0.722357	0.476716	0.387579	0.577086	0.643547	0.723213	0.706663	0.289064
Cell_0065	TFEB_TR	MK-2206 1000 nM	1.27487	0.337521	3.12495	0.850569	3.31244	1.98575	0.553775	1.60627	2.04285	0.955838	0.486689	0.766457	2.20903	1.03871	1.06956	0.966216	1.28597	1.36296	1.02853	1.20512	1.69959	1.33349	1.05279	0.427201	1.27227	1.32604	1.46439	3.19498	4.19579	2.20762	3.20639	0.935684	0.818593	1.42581	2.15257	1.86613	1.19713	0.551604	2.39487	1.7173	1.48721	1.61133	1.89551	0.801371	1.04754	0.658978	0.649009
Cell_0065	FOXO_TR	MK-2206 1000 nM	1.06662	0.909798	1.88434	0.70047	3.02473	1.44935	0.754899	0.891678	1.58555	0.958479	1.0227	1.17268	0.953026	1.30584	1.90614	1.04785	0.823025	2.28208	0.898763	0.747331	1.42385	0.898256	1.12659	2.01741	0.74593	1.07689	1.1389	0.964133	1.01909	1.09935	1.18621	1.04002	0.992454	0.908737	1.36575	1.41587	2.67996	0.951122	1.99997	2.89009	0.985577	0.771024	3.39543	0.855193	1.02298	3.18662	0.848652
Cell_0065	AMPKARt2	MK-2206 1000 nM	0.599731	0.718916	0.668261	0.518305	0.169817	0.492062	0.512143	0.473274	0.549967	0.630418	0.632487	0.57452	0.451771	0.526244	0.611883	0.691128	0.623023	0.537051	0.716514	0.713118	0.544009	0.564817	0.633007	0.686301	0.565541	0.550881	0.418213	0.675966	0.660376	0.444795	0.539009	0.479493	0.635689	0.312307	0.606301	0.645244	0.518088	0.716341	0.598531	0.718985	0.475859	0.355966	0.613904	0.643084	0.698395	0.72108	0.29512
Cell_0066	TFEB_TR	MK-2206 1000 nM	1.22256	0.347133	2.75563	0.88147	1.78884	1.9951	0.6517	1.58759	1.92921	0.928382	0.472867	0.765376	2.31385	1.15801	1.08149	0.947592	1.37055	1.47715	1.2095	1.20149	1.67801	1.39579	0.899689	0.504383	1.21891	1.34532	1.45565	3.00632	2.43508	2.07212	3.18389	0.904246	0.799829	1.36489	1.90582	1.59892	1.1998	0.562074	1.9925	1.21877	1.47112	1.59287	2.07891	0.777091	0.905558	0.587278	0.600475
Cell_0066	FOXO_TR	MK-2206 1000 nM	1.05636	0.933446	1.47159	0.728439	1.62962	1.38682	0.76121	0.926476	1.56002	0.982795	1.00581	1.1617	0.980887	1.40763	1.9271	1.03752	0.841455	2.15407	0.895595	0.745268	1.40376	0.904938	1.13216	2.07583	0.722813	1.01107	1.20853	0.993175	1.05507	1.0401	1.33897	1.0411	1.00399	0.922361	1.32567	1.37533	2.7512	0.958101	2.00886	2.88952	0.936715	0.838746	3.39925	0.880851	0.957385	3.28202	0.762054
Cell_0066	AMPKARt2	MK-2206 1000 nM	0.609332	0.682929	0.661734	0.531276	0.291916	0.486069	0.506888	0.487704	0.525619	0.614947	0.632129	0.570589	0.443393	0.568276	0.62312	0.668558	0.641541	0.538258	0.728761	0.700693	0.530292	0.556312	0.640975	0.682213	0.552651	0.599359	0.424611	0.663703	0.658724	0.42677	0.560902	0.447714	0.629325	0.31583	0.567347	0.638507	0.522027	0.726028	0.615271	0.696522	0.43838	0.399311	0.628269	0.658525	0.690915	0.703812	0.293542
Cell_0067	TFEB_TR	MK-2206 1000 nM	1.19612	0.368806	2.56332	0.879928	2.75975	2.30998	0.316047	1.58389	1.86021	0.874382	0.427301	0.758745	2.18878	1.1166	1.06736	0.879439	1.65547	1.38439	1.25996	1.07285	1.63467	1.14377	0.96885	0.519156	1.12345	0.812567	1.61724	3.01997	2.82266	2.17103	4.42456	0.898963	1.0699	1.30163	1.72276	1.64554	1.08507	0.672965	2.48084	2.75007	1.478	1.18033	2.12692	0.76343	1.11182	0.89545	0.561583
Cell_0067	FOXO_TR	MK-2206 1000 nM	1.08535	0.907714	1.26633	0.728361	2.47892	1.264	0.789886	0.948734	1.56882	0.995141	0.94678	1.1969	1.00745	1.37591	2.07663	1.03975	0.839495	1.99067	0.94292	0.715296	1.37357	0.898484	1.1391	2.00651	0.699192	0.646221	1.27664	0.96389	1.05021	1.0551	1.20844	1.10374	1.0322	0.85873	1.33491	1.29571	2.68664	0.948522	1.99784	2.85495	0.954633	0.778052	3.3533	0.848297	1.1121	3.35748	0.760775
Cell_0067	AMPKARt2	MK-2206 1000 nM	0.601744	0.717997	0.654627	0.521083	0.139855	0.485497	0.510123	0.470932	0.535289	0.632995	0.636148	0.589456	0.469006	0.543642	0.615213	0.672318	0.652751	0.506083	0.703124	0.69808	0.527065	0.576019	0.632692	0.690822	0.544582	0.670403	0.425683	0.691841	0.634161	0.421944	0.555263	0.472015	0.620649	0.299758	0.523176	0.678625	0.527208	0.72036	0.618027	0.716983	0.459203	0.385113	0.662132	0.658552	0.703556	0.715739	0.32806
Cell_0068	TFEB_TR	MK-2206 1000 nM	1.24344	0.359739	2.43194	0.877694	2.20284	2.39444	0.661522	1.51013	1.90431	0.885171	0.436427	0.813734	1.83721	1.17628	0.956253	0.92059	1.28664	1.59158	1.0006	1.02587	0.645552	1.21824	0.929214	0.56564	1.10722	1.30942	1.59019	2.85403	2.13768	1.9714	3.5342	0.887585	1.12062	1.37968	2.07519	1.75208	1.39986	0.607126	2.34964	1.43936	1.5679	1.26057	2.08449	0.84665	1.31809	0.789601	0.586812
Cell_0068	FOXO_TR	MK-2206 1000 nM	1.12929	0.930831	1.16623	0.748305	2.84489	1.01861	0.814688	0.923545	1.63962	0.965904	0.973845	1.2979	0.938609	1.48524	2.03249	1.04619	0.830733	1.95857	0.962281	0.696197	1.61014	0.90322	1.14439	1.98696	0.690255	0.87318	1.28704	0.983263	1.05491	1.03425	1.09816	1.08818	1.04499	0.840789	1.45448	1.2435	3.12958	0.977169	1.94614	2.74313	0.989745	0.81856	3.51311	0.84325	1.26681	3.36803	0.775586
Cell_0068	AMPKARt2	MK-2206 1000 nM	0.625463	0.736252	0.651218	0.525384	0.0926496	0.518157	0.497664	0.459356	0.566153	0.617688	0.605774	0.582102	0.439291	0.553304	0.63936	0.679022	0.6387	0.505798	0.710104	0.725022	0.58731	0.575952	0.611757	0.682449	0.535519	0.607866	0.405823	0.691315	0.643007	0.423387	0.546823	0.499682	0.632865	0.307066	0.557438	0.647232	0.487853	0.72396	0.603732	0.727341	0.449458	0.41726	0.658392	0.650469	0.716196	0.709436	0.281899
Cell_0069	TFEB_TR	MK-2206 1000 nM	1.17507	0.342799	1.44972	0.854239	2.62488	1.98893	0.466574	1.45815	1.95629	0.778081	0.453712	0.882222	1.84222	1.11418	1.01765	0.908714	1.21513	1.39424	1.4479	0.975897	0.886811	1.17729	0.836447	0.365123	1.13264	1.43284	1.58227	2.88522	2.40895	2.22949	1.89656	0.889074	1.11322	1.40167	2.21963	1.57242	1.42365	0.542459	2.9775	1.80842	1.60698	0.921415	2.52175	0.985791	1.29123	0.77188	0.562792
Cell_0069	FOXO_TR	MK-2206 1000 nM	1.10068	0.902142	1.04359	0.727105	2.61943	0.841498	0.793903	0.912974	1.70108	0.976013	0.950843	1.35367	0.93946	1.41602	1.98148	1.03788	0.836664	1.9621	0.947664	0.680052	1.6948	0.868851	1.1507	1.99034	0.715353	1.10739	1.34759	0.976621	1.07575	1.08849	1.11831	1.10411	1.08443	0.810565	1.39647	1.27325	2.48197	0.930732	2.10462	2.95984	0.978016	0.831755	3.64327	0.855453	1.16649	3.32979	0.854887
Cell_0069	AMPKARt2	MK-2206 1000 nM	0.62103	0.708514	0.621056	0.554322	0.179776	0.525326	0.47637	0.480414	0.554366	0.634106	0.595909	0.574975	0.424334	0.556043	0.64443	0.691203	0.636895	0.527234	0.703537	0.727853	0.608189	0.596086	0.611133	0.684759	0.536144	0.569183	0.405038	0.658204	0.629303	0.442408	0.537517	0.476889	0.608744	0.288556	0.564334	0.665945	0.533441	0.693118	0.593751	0.704116	0.45917	0.40211	0.598666	0.64097	0.708633	0.648193	0.240232
Cell_0070	TFEB_TR	MK-2206 1000 nM	1.25531	0.331463	1.84353	0.856025	2.78929	2.09514	0.367561	1.42436	1.94427	0.837532	0.439917	0.859852	1.8066	1.1235	1.07769	0.992416	1.67671	1.44051	0.826959	0.954349	0.777487	1.07321	0.868911	0.621266	1.0684	1.36413	1.70086	3.10803	3.24534	2.02915	2.52515	0.898572	1.1964	1.32002	2.49	1.74901	1.37035	0.542933	3.10531	1.66194	1.52623	1.07705	2.45919	1.06606	1.28053	0.957914	0.494506
Cell_0070	FOXO_TR	MK-2206 1000 nM	1.09383	0.896702	1.0286	0.72752	2.3065	0.759453	0.816709	0.86957	1.8274	0.996518	0.913896	1.34411	0.961422	1.42467	2.29699	1.0354	0.841622	2.08374	0.983416	0.664809	1.75361	0.877234	1.10725	2.11094	0.682099	1.07441	1.44819	1.00715	1.0949	1.06291	1.15718	1.10397	1.02475	0.772856	1.43213	1.33857	1.96634	0.941714	2.16993	3.06359	0.969701	0.730963	3.55908	0.832716	1.12823	3.2239	0.837953
Cell_0070	AMPKARt2	MK-2206 1000 nM	0.607438	0.724492	0.642582	0.525624	0.157131	0.537432	0.48209	0.499625	0.564189	0.642469	0.613634	0.583281	0.451152	0.558049	0.637281	0.70453	0.658021	0.499376	0.719758	0.716308	0.580887	0.600916	0.588939	0.67528	0.539151	0.594146	0.444324	0.679958	0.599257	0.423377	0.558282	0.467178	0.632457	0.311883	0.539798	0.665431	0.54052	0.702884	0.596608	0.712167	0.445242	0.349223	0.566655	0.652019	0.682138	0.676182	0.24365
Cell_0071	TFEB_TR	MK-2206 1000 nM	1.21294	0.330421	1.23937	0.843923	3.54809	1.84804	0.380242	1.46064	2.04617	0.849702	0.422044	0.836828	1.95169	1.10144	1.18375	0.974334	1.72096	1.63485	1.47927	1.01171	0.780443	1.18872	0.805988	0.523888	1.08686	1.79705	1.60358	3.48462	2.25562	1.94043	2.57409	0.939632	1.1263	1.44961	2.63506	1.63074	1.22575	0.501025	2.77981	3.23422	1.57213	0.728594	2.19596	1.57615	1.22788	0.902443	0.486363
Cell_0071	FOXO_TR	MK-2206 1000 nM	1.07622	0.902152	1.0158	0.715655	1.78498	0.710261	0.785518	0.855489	1.66101	0.964547	0.869348	1.37958	0.955592	1.40834	2.35717	1.05698	0.865351	2.46504	0.993992	0.676086	1.67094	0.89172	1.11502	2.05794	0.689954	1.22344	1.46367	1.05693	1.07037	1.00666	1.10906	1.0953	1.12428	0.740073	1.38632	1.27544	1.6971	1.00078	2.14552	3.18975	1.02433	0.769356	3.36597	0.860868	1.16134	2.84881	0.80412
Cell_0071	AMPKARt2	MK-2206 1000 nM	0.588342	0.713756	0.633279	0.515352	0.238011	0.537893	0.468426	0.479025	0.521232	0.633414	0.570259	0.582413	0.482802	0.563475	0.64564	0.712126	0.653663	0.47709	0.729826	0.714533	0.600376	0.606668	0.609416	0.667527	0.522527	0.550775	0.459999	0.676562	0.620371	0.384372	0.543598	0.507532	0.596217	0.269629	0.506745	0.658391	0.486806	0.707038	0.595548	0.713382	0.477739	0.35904	0.594899	0.661548	0.666702	0.68393	0.239085
Cell_0072	TFEB_TR	MK-2206 1000 nM	1.15401	0.358239	0.822276	0.839248	2.83874	1.707	0.531916	1.47669	2.08825	0.765737	0.411408	0.850072	1.90706	1.13386	1.39745	1.00739	1.70749	1.33353	1.15229	1.06767	0.782288	1.28659	0.799866	0.993661	1.12016	1.26482	1.61202	3.38854	2.34371	2.08839	2.62302	1.02261	1.23057	1.32695	2.62822	1.7329	1.01383	0.573141	2.50509	1.14373	2.10034	1.65234	2.07588	1.77654	0.946801	0.889908	0.522432
Cell_0072	FOXO_TR	MK-2206 1000 nM	1.09398	0.953961	1.01074	0.736963	2.51223	0.681366	0.795882	0.879944	1.4243	0.983596	0.873042	1.46193	0.982209	1.40345	2.39138	1.06751	0.914995	2.72637	0.923852	0.682591	1.67553	0.894355	1.13581	2.51872	0.737475	1.08198	1.4795	1.05883	1.06014	1.04344	1.06093	1.10894	1.1972	0.726738	1.40016	1.24943	1.25442	0.981632	2.11297	3.22457	1.00263	0.752486	3.48688	0.854212	0.95413	2.99832	0.853675
Cell_0072	AMPKARt2	MK-2206 1000 nM	0.630578	0.718487	0.63626	0.546295	0.119652	0.528047	0.469007	0.487966	0.611368	0.624537	0.589056	0.550385	0.45607	0.551483	0.629727	0.704124	0.649109	0.52202	0.729887	0.728084	0.597914	0.600602	0.614361	0.640864	0.558167	0.539325	0.461155	0.693715	0.616	0.394277	0.528913	0.481045	0.602425	0.292345	0.531673	0.664408	0.564707	0.730705	0.596086	0.710394	0.49877	0.348153	0.603174	0.631168	0.679587	0.697534	0.261598
Cell_0073	TFEB_TR	MK-2206 1000 nM	1.12771	0.343461	1.0988	0.822446	2.90789	1.67705	0.986543	1.47343	2.10326	0.82579	0.465057	0.951926	1.79129	1.0681	1.50866	0.938687	1.25359	1.64858	0.891856	1.05913	0.755479	1.24987	0.746485	1.16301	1.1246	1.39394	1.59577	3.54372	1.975	2.11367	2.09851	1.0351	1.12825	1.31817	2.62138	1.54623	0.932873	0.65482	3.01781	1.36833	1.54709	1.14092	2.11187	0.997432	1.14328	1.01649	0.543673
Cell_0073	FOXO_TR	MK-2206 1000 nM	1.11317	0.928743	1.01364	0.716036	2.79589	0.649056	0.84693	0.867679	1.2869	0.983882	0.822895	1.84715	0.955796	1.39368	2.36548	1.07028	0.893927	2.93893	0.967753	0.700788	1.67751	0.885377	1.12528	2.56782	0.69479	1.23161	1.40855	1.05569	1.08062	1.08475	1.03912	1.10515	1.12763	0.683439	1.41399	1.24993	1.15581	0.901438	2.12608	2.39432	0.991243	0.764292	3.34452	0.86236	1.04334	3.07532	0.901266
Cell_0073	AMPKARt2	MK-2206 1000 nM	0.607537	0.696407	0.640811	0.56243	-0.000530183	0.533483	0.511628	0.482843	0.572705	0.622613	0.553205	0.564336	0.445913	0.550509	0.643507	0.709091	0.665026	0.516033	0.730404	0.722395	0.612815	0.614002	0.612426	0.626734	0.53792	0.568137	0.437932	0.687275	0.638258	0.394752	0.538944	0.503215	0.618994	0.27788	0.556602	0.641415	0.538723	0.710623	0.555281	0.726485	0.501328	0.318795	0.613858	0.658715	0.704009	0.690427	0.221921
Cell_0074	TFEB_TR	MK-2206 1000 nM	1.14512	0.364206	1.04162	0.803822	2.27988	1.6482	0.408243	1.56838	2.03914	0.79502	0.431595	0.968199	1.6774	1.11163	1.50988	0.972475	1.43259	1.87005	0.659811	1.26794	1.03168	1.42583	0.84672	1.17551	1.23975	1.55057	1.61572	4.04417	2.30424	2.0474	1.87839	1.12161	1.02593	1.29795	2.72094	1.60386	0.930541	0.635812	3.51943	1.26416	1.56298	8.56614	2.22138	1.09952	0.947321	0.986497	0.52962
Cell_0074	FOXO_TR	MK-2206 1000 nM	1.11817	0.980929	1.00345	0.703336	1.59488	0.642328	0.800528	0.890942	1.11817	0.988773	0.879011	2.18939	0.962747	1.42503	2.32889	1.05353	0.898119	3.03566	0.951485	0.75043	1.70756	0.902064	1.10586	2.58955	0.75445	1.04655	1.4774	1.09901	1.07927	0.959602	1.04836	1.13267	1.05807	0.727341	1.36	1.28388	1.06209	0.928122	2.02513	1.8491	1.00478	0.769657	3.26072	0.90823	0.979504	2.86436	0.921697
Cell_0074	AMPKARt2	MK-2206 1000 nM	0.604649	0.708281	0.649588	0.553921	0.237557	0.539608	0.454028	0.498477	0.552974	0.629339	0.57741	0.569705	0.385207	0.511127	0.632861	0.702427	0.655255	0.482606	0.727394	0.710174	0.61475	0.585194	0.576449	0.642574	0.554463	0.608243	0.474777	0.693426	0.645564	0.411065	0.509049	0.499682	0.635562	0.315642	0.589676	0.6439	0.545818	0.718945	0.578869	0.747324	0.500432	0.298879	0.654819	0.664913	0.680585	0.688361	0.226579
Cell_0075	TFEB_TR	MK-2206 1000 nM	1.256	0.356046	0.689482	0.812195	3.53666	1.69253	0.688265	1.581	2.05505	0.737072	0.42702	0.964108	1.81506	1.1454	1.48717	0.966364	1.78662	1.91567	1.31928	1.33817	0.771683	1.15044	0.875884	1.35374	1.15788	1.45992	1.69925	3.04738	2.59697	2.08075	2.50064	1.03022	0.899253	1.28508	3.18458	1.77626	0.847635	0.51469	3.32307	2.05264	1.61513	5.42432	2.17178	0.966867	1.33021	0.851574	0.559267
Cell_0075	FOXO_TR	MK-2206 1000 nM	1.12082	0.966249	1.09371	0.722456	2.34609	0.654288	0.795483	0.896461	1.02684	0.988812	0.874873	1.02592	0.962389	1.42177	2.34426	1.08341	0.901453	2.83608	0.969131	0.756271	1.75393	0.930869	1.1132	2.744	0.725767	1.07606	1.48411	1.08911	1.06363	0.974221	1.01095	1.10447	1.11171	0.727593	1.38665	1.21757	1.03082	0.927978	2.10142	1.53999	1.04487	0.764996	3.30761	0.866191	1.13282	3.14091	0.96739
Cell_0075	AMPKARt2	MK-2206 1000 nM	0.590242	0.693718	0.67742	0.547123	0.106149	0.527636	0.44832	0.498193	0.535668	0.630422	0.594868	0.349265	0.385726	0.541561	0.646246	0.716069	0.658321	0.478651	0.741036	0.709686	0.60631	0.602398	0.603584	0.643403	0.500281	0.609507	0.459175	0.692926	0.622509	0.402041	0.485825	0.491251	0.638943	0.306695	0.590122	0.621855	0.569116	0.694159	0.569317	0.723003	0.453452	0.311359	0.652508	0.656519	0.676148	0.683759	0.218395
Cell_0076	TFEB_TR	MK-2206 1000 nM	1.07738	0.352332	2.2344	0.814502	2.62806	1.66647	0.582492	1.56305	1.97347	0.782228	0.4192	0.937563	2.05255	1.11826	1.83141	1.10583	2.66259	1.80323	1.15275	1.35856	0.819376	1.34536	0.591504	1.361	1.1789	1.57683	1.96156	3.09133	2.40585	1.96849	2.21163	1.081	0.868372	1.40587	3.00372	1.78326	0.821605	0.610672	3.1267	2.14569	1.6292	3.2135	2.52896	0.854525	1.28843	1.00328	0.588282
Cell_0076	FOXO_TR	MK-2206 1000 nM	1.1477	0.964334	1.01591	0.72447	2.21546	0.651043	0.740975	0.903792	1.04763	1.01944	0.899478	1.01642	0.981604	1.36892	2.40207	1.11421	0.948068	2.69488	0.974354	0.767756	1.73053	0.927561	1.07347	2.75806	0.698803	1.19356	2.50639	1.10614	1.07307	1.05298	1.02707	1.12571	1.11076	0.73041	1.31907	1.19164	1.05717	0.960168	2.17772	1.30885	1.00054	0.735866	3.06658	0.93364	1.13312	3.13717	0.892204
Cell_0076	AMPKARt2	MK-2206 1000 nM	0.598562	0.697421	0.64919	0.558833	0.246829	0.51686	0.414408	0.496625	0.530309	0.624523	0.572421	0.373249	0.388056	0.559298	0.655481	0.705936	0.69611	0.471455	0.732409	0.704062	0.619983	0.604282	0.610443	0.641218	0.5034	0.587696	0.55416	0.677133	0.655583	0.415513	0.500111	0.47648	0.626095	0.279822	0.54843	0.683321	0.546881	0.707067	0.559764	0.716138	0.456101	0.292895	0.635988	0.670401	0.612603	0.698388	0.241449
Cell_0077	TFEB_TR	MK-2206 1000 nM	1.12293	0.339588	1.62533	0.816394	2.73264	1.55296	1.01118	1.57391	1.93348	0.766593	0.440802	0.943073	2.07992	1.11241	1.81663	1.12934	1.54554	1.54011	1.07885	1.42796	0.700333	1.37895	0.640339	1.24667	1.0691	1.71432	1.93008	2.15773	2.07732	2.19801	2.48275	1.02545	0.840292	1.31691	3.07061	2.12449	0.862194	0.563222	3.36928	1.65763	1.50969	3.46547	2.2191	1.04627	1.4162	0.937129	0.579759
Cell_0077	FOXO_TR	MK-2206 1000 nM	1.1208	0.974473	1.04167	0.710632	2.57768	0.641752	0.763681	0.873172	1.02484	1.02895	0.956391	0.982861	0.95545	1.38094	2.32831	1.13391	0.917528	2.42753	1.01806	0.763265	1.6956	0.921371	1.05357	3.03485	0.67872	0.995629	2.51211	1.07468	1.03324	1.15219	1.0183	1.13601	1.11484	0.731804	1.40018	1.32544	1.12209	0.960592	2.18157	1.18345	0.997853	0.756965	2.3635	0.909538	1.16013	3.38079	0.852024
Cell_0077	AMPKARt2	MK-2206 1000 nM	0.60074	0.70672	0.644887	0.516419	0.157342	0.511829	0.417579	0.462997	0.524025	0.624545	0.560339	0.362711	0.36543	0.57163	0.654073	0.703444	0.671152	0.499373	0.713289	0.712978	0.623165	0.620514	0.592394	0.61236	0.501914	0.604583	0.566991	0.697339	0.627457	0.431954	0.462921	0.485383	0.63209	0.264957	0.56841	0.30915	0.537385	0.706815	0.555018	0.717682	0.463055	0.271792	0.671301	0.662238	0.558809	0.69759	0.263112
Cell_0078	TFEB_TR	MK-2206 1000 nM	0.972955	0.341259	2.3567	0.806084	3.20532	1.68694	0.300704	1.54661	1.91758	0.747187	0.416295	0.897621	2.18707	1.12748	1.56773	1.0765	1.65487	1.60167	1.21123	1.49916	0.966834	1.31862	0.756169	1.49852	1.06617	1.87046	1.75663	2.23135	2.3456	2.09289	1.64312	1.20361	0.768047	1.23687	2.67728	1.42633	0.897704	0.583327	2.82519	1.73552	1.43087	1.64974	1.90979	1.68593	1.35428	0.853094	0.628332
Cell_0078	FOXO_TR	MK-2206 1000 nM	1.09583	0.991081	1.01709	0.733587	2.00264	0.671065	0.737421	0.859791	0.995661	1.05579	0.867909	0.946411	0.976379	1.34358	2.28792	1.06834	0.936374	2.29875	0.989074	0.780762	1.60821	0.907025	1.04833	2.96552	0.684312	1.05033	2.51676	1.08781	1.07857	1.13835	0.997198	1.14698	1.11353	0.776745	1.34117	1.30323	1.10432	1.03978	2.15763	1.10211	0.954634	0.881696	1.8816	0.95875	1.14786	3.3039	1.03875
Cell_0078	AMPKARt2	MK-2206 1000 nM	0.621131	0.703789	0.655234	0.548822	0.216621	0.496812	0.389264	0.500826	0.531108	0.633504	0.575964	0.343563	0.345133	0.529135	0.677893	0.691602	0.672798	0.483152	0.725077	0.713216	0.588864	0.591216	0.610959	0.621789	0.494329	0.604482	0.573296	0.710732	0.598309	0.434671	0.479122	0.452439	0.637637	0.23203	0.566377	0.621123	0.52149	0.721705	0.576785	0.718865	0.47296	0.283348	0.685224	0.660165	0.632346	0.680868	0.298461
Cell_0079	TFEB_TR	MK-2206 1000 nM	1.13332	0.346195	2.18425	0.792219	2.63956	1.66602	0.36833	1.52822	1.91526	0.777735	0.427273	0.841059	2.28208	1.04702	1.72476	1.1389	1.3723	1.68482	1.65603	1.41341	0.478979	1.22504	0.64894	1.48728	1.07694	1.84762	1.68954	2.6798	2.30969	2.13668	1.89543	1.00426	0.870343	1.27816	2.47941	1.37889	0.875498	0.524132	3.01184	1.80989	1.37867	4.60471	1.69931	1.18074	1.19015	0.836068	0.703075
Cell_0079	FOXO_TR	MK-2206 1000 nM	1.10602	0.98985	1.05015	0.722258	2.28694	0.660683	0.729139	0.871016	0.978874	1.1355	0.921052	0.872766	1.00416	1.2362	2.13778	1.18229	0.976883	2.39141	1.04819	0.771937	1.32058	0.901493	0.999612	2.66169	0.683109	1.21552	2.82063	1.08889	1.05071	1.11967	0.958771	1.08148	1.13369	0.780022	1.34664	1.28759	1.08699	1.06705	2.21667	1.0839	0.946303	0.878343	1.54663	0.891764	1.14926	3.46186	1.09
Cell_0079	AMPKARt2	MK-2206 1000 nM	0.614459	0.690995	0.639106	0.51667	0.211605	0.47024	0.338112	0.47473	0.534965	0.640985	0.580068	0.307904	0.327413	0.524736	0.641302	0.680353	0.668177	0.471742	0.73388	0.712154	0.540546	0.59988	0.565198	0.601498	0.517215	0.561532	0.560079	0.701669	0.618853	0.41132	0.487969	0.431265	0.64011	0.232255	0.576831	0.621628	0.530992	0.691165	0.577083	0.736897	0.485317	0.260925	0.684834	0.659148	0.698064	0.694912	0.393934
Cell_0080	TFEB_TR	MK-2206 1000 nM	1.07831	0.355161	2.40446	0.779679	3.65375	1.83639	0.342939	1.54127	1.90028	0.627162	0.44573	0.79474	2.23034	1.06558	1.54546	1.01772	3.15286	1.50343	1.57234	1.48356	0.82087	1.40576	0.620515	1.91079	1.13131	1.67825	1.75901	2.13127	2.98341	0.635068	1.55378	0.985705	1.16004	1.24346	2.46737	1.5176	0.823393	0.460756	3.19848	2.01892	1.39781	1.40618	1.89241	1.22564		0.932979	0.632002
Cell_0080	FOXO_TR	MK-2206 1000 nM	1.14266	1.02982	1.06236	0.718935	1.49863	0.68563	0.716068	0.877637	1.02151	0.944721	1.01048	0.829097	0.98556	1.28512	1.65876	1.14221	0.961401	2.4589	1.06544	0.779377	1.49641	0.917472	1.02358	2.58809	0.722878	1.20929	2.92942	1.04267	1.0804	1.78282	1.09763	1.09054	1.11785	0.771439	1.35492	1.31401	0.997654	0.955281	2.27572	1.00501	0.951437	0.918146	1.30897	0.883921		3.36177	1.04149
Cell_0080	AMPKARt2	MK-2206 1000 nM	0.614814	0.685404	0.65772	0.557138	0.324221	0.530534	0.324857	0.486369	0.538847	0.63713	0.540582	0.283438	0.327134	0.552895	0.675066	0.663871	0.66524	0.486504	0.723987	0.706834	0.563017	0.601225	0.559393	0.607155	0.487878	0.624253	0.549302	0.700593	0.582265	0.660903	0.499562	0.439601	0.635044	0.213444	0.554379	0.633391	0.546398	0.692982	0.577381	0.731252	0.504877	0.423898	0.670242	0.674325		0.677036	0.450658
Cell_0081	TFEB_TR	MK-2206 1000 nM	1.00502	0.358849	2.40579	0.771073	2.18686	1.58739	0.950077	1.53434	1.89677	0.569982	0.513634	0.780401	2.48704	1.06304	1.44204	1.19603	1.71991	1.7321	1.45532	1.46	0.697429	1.55452	0.606562	2.08366	1.10664	1.98082	1.74332	2.60287	2.03374	0.561169	1.93474	0.934559	0.786379	1.18241	2.45533	1.50751	0.783315	0.471296	1.75977	1.92161	1.39976	1.26552	1.59952	1.24297		0.806718	0.58052
Cell_0081	FOXO_TR	MK-2206 1000 nM	1.18917	1.01305	1.06897	0.709977	1.46751	0.669322	0.698457	0.873315	0.990322	0.912747	1.12478	0.832408	0.956483	1.27034	1.36235	1.22361	0.916338	2.61282	1.11018	0.775346	1.50411	0.891449	1.03779	2.36337	0.74304	1.08851	2.69254	1.05784	1.04201	1.66051	1.09075	1.09596	1.14577	0.779113	1.3632	1.36416	1.0322	0.991013	2.50422	1.02487	0.92274	0.903009	1.22516	0.870223		2.53594	1.00679
Cell_0081	AMPKARt2	MK-2206 1000 nM	0.625418	0.69346	0.664123	0.547683	0.337069	0.522291	0.347074	0.462712	0.544178	0.624836	0.554033	0.274098	0.320096	0.55032	0.692231	0.688227	0.672159	0.456947	0.713836	0.731212	0.607459	0.583111	0.568166	0.639125	0.529348	0.647757	0.546608	0.684989	0.588682	0.660701	0.469627	0.478063	0.645097	0.180331	0.531928	0.635152	0.555393	0.701002	0.635341	0.71906	0.500957	0.444809	0.670053	0.664113		0.712252	0.428276
Cell_0082	TFEB_TR	MK-2206 1000 nM	1.26934	0.341803	1.85111	0.794469	2.46303	1.64023	0.57989	1.56512	1.84798	0.581843	0.429769	0.751723	2.47156	1.04	1.08056	1.128	2.52208	2.2242	1.17025	1.46672	0.992993	1.30378	0.57354	2.65542	1.0942	1.79463	1.8141	3.37963	2.64735	0.578003	2.0192	1.08304	0.868769	1.19949	2.96781	1.44369	0.799822	0.391309	3.04421	1.47793	1.5387	1.12487	1.66204	1.43508		0.754368	0.588587
Cell_0082	FOXO_TR	MK-2206 1000 nM	1.18644	1.01776	1.07121	0.737221	1.81057	0.681865	0.715645	0.870375	1.00919	0.920761	0.936091	0.839704	1.00194	1.25517	1.1096	1.24187	0.937843	2.55053	1.21007	0.769908	1.55334	0.905437	1.02019	2.49813	0.729176	1.0203	2.58772	1.06287	1.07141	1.7797	1.08487	1.23577	1.11747	0.789527	1.38657	1.3439	1.12683	1.07718	2.19253	0.971949	1.00834	0.887873	1.15795	0.899336		1.84788	0.919146
Cell_0082	AMPKARt2	MK-2206 1000 nM	0.614366	0.691004	0.66572	0.516588	0.286014	0.515374	0.312845	0.472094	0.539451	0.637678	0.502631	0.273556	0.305248	0.565824	0.682043	0.694135	0.690169	0.425978	0.719126	0.717477	0.639014	0.58903	0.562015	0.639912	0.536175	0.662512	0.568325	0.697911	0.630543	0.648322	0.484851	0.415628	0.66167	0.218502	0.532456	0.630387	0.471896	0.708741	0.570652	0.736863	0.505324	0.465719	0.667693	0.67948		0.710251	0.411733
Cell_0083	TFEB_TR	MK-2206 1000 nM	1.17436	1.57827	1.50561	0.798611	1.74621	1.6744	0.693029	1.5603	1.76842	0.655242	0.424716	0.720305	2.34692	1.09733	1.05481	1.09213	2.49427	1.81176	1.28331	1.30879	0.7536	1.49174	0.633255	1.81974	1.14739	1.63332	1.71981	2.8308	2.86237	0.61892	2.06533	0.989013	0.850611	1.08221	2.73358	1.8825	0.746148	0.562346	3.65135	1.56477	1.56846	1.46635	1.44536	1.07864		0.730215	0.585589
Cell_0083	FOXO_TR	MK-2206 1000 nM	1.1621	1.56808	1.06712	0.726334	1.44947	0.686098	0.756898	0.878366	1.00307	0.950065	0.928459	0.854152	0.963842	1.24264	0.951165	1.20106	0.942433	2.22736	1.23748	0.754469	1.40915	0.879647	1.0004	2.575	0.755159	1.08281	2.52219	1.03005	1.09122	1.80795	1.01112	1.18739	1.15202	0.773769	1.41868	1.26369	1.05783	1.07563	2.15716	0.960846	1.04494	0.772265	1.07793	0.906351		1.49758	0.975063
Cell_0083	AMPKARt2	MK-2206 1000 nM	0.635028	0.524619	0.668859	0.519691	0.333115	0.50452	0.356258	0.482657	0.550764	0.641473	0.529025	0.287569	0.346444	0.544046	0.664342	0.686298	0.684518	0.387967	0.736543	0.71031	0.626772	0.613473	0.558344	0.646237	0.506671	0.644844	0.564404	0.692177	0.626124	0.663111	0.482883	0.43564	0.658116	0.213638	0.563687	0.433205	0.517476	0.708486	0.615448	0.732566	0.491177	0.379876	0.671596	0.670578		0.693191	0.425361
Cell_0084	TFEB_TR	MK-2206 1000 nM	1.09022	1.63653	2.34587	0.803933	2.70425	1.67554	1.12322	1.60934	1.72301	0.663697	0.446381	0.701897	2.57839	1.14246	0.84307	1.01218	1.37822	1.86406	1.58484	1.40355	0.750643	1.18907	0.643936	2.04559	1.15616	1.61342	1.6753	2.86984	2.92377	0.646547	2.26028	0.830756	1.19457	1.09398	2.59234	1.61327	0.828778	0.52616	3.22657	1.26428	1.50177	4.81345	1.6854	1.27523		0.743289	0.594369
Cell_0084	FOXO_TR	MK-2206 1000 nM	1.17724	1.52733	1.0968	0.734823	1.43241	0.686991	0.747201	0.900809	1.03113	0.981736	1.0253	0.846952	0.997782	1.31211	0.902771	1.23717	0.965125	1.8721	1.40167	0.753835	1.39289	0.899468	1.06119	2.89029	0.761563	1.1102	2.43569	1.03573	1.06809	1.66845	1.04387	1.09361	2.30584	0.760686	1.36929	1.34334	1.15204	1.09125	2.24723	0.968627	1.00394	0.915091	1.07097	0.944355		1.26872	0.927393
Cell_0084	AMPKARt2	MK-2206 1000 nM	0.605573	0.530338	0.675254	0.532116	0.259566	0.513907	0.379517	0.480788	0.529016	0.63248	0.515754	0.258175	0.32152	0.580931	0.686248	0.67506	0.680605	0.415196	0.721745	0.714055	0.599333	0.580792	0.591285	0.611334	0.503911	0.596335	0.556796	0.714857	0.635576	0.68055	0.484936	0.454157	0.637678	0.197583	0.519561	0.641259	0.477446	0.68358	0.577891	0.756082	0.512589	0.468399	0.681351	0.6727		0.692313	0.416243
Cell_0085	TFEB_TR	MK-2206 1000 nM	1.07598	1.40472	2.69149	0.822655	2.32541	1.65867	1.02957	1.63063	1.61651	0.651591	0.417585	0.720722	2.30184	1.11316	0.948882	1.19527	1.21877	1.77604	1.43683	1.36448	0.647373	1.35774	0.621171	2.47612	1.15249	1.99126	1.57729	2.73002	3.25721	0.685848	1.98498	0.936799	1.0744	1.13302	2.62843	1.62961	0.738881	0.599588	2.80053	2.10161	1.5722	7.2251	1.50576	1.09784		0.617948	0.566772
Cell_0085	FOXO_TR	MK-2206 1000 nM	1.15754	1.69149	1.14453	0.747512	1.68049	0.662429	0.746655	0.903903	1.0153	0.93313	0.943776	0.822935	0.960986	1.29807	0.891319	1.13984	0.962599	1.55495	1.31629	0.763526	1.4538	0.903471	1.04859	2.7171	0.785513	1.27754	2.23724	1.0289	1.08194	1.68696	1.00495	1.14319	2.37198	0.766683	1.39702	1.37923	1.05519	1.06689	2.22514	0.969184	1.0456	0.874579	1.02188	0.939529		1.1804	0.995749
Cell_0085	AMPKARt2	MK-2206 1000 nM	0.615563	0.539512	0.667327	0.508275	0.195343	0.509282	0.337721	0.492152	0.513294	0.622707	0.539197	0.250457	0.348998	0.564174	0.686965	0.674188	0.681167	0.413343	0.71423	0.71184	0.64193	0.581638	0.59216	0.602744	0.487291	0.586805	0.556304	0.702242	0.65863	0.653551	0.495676	0.44804	0.62799	0.196995	0.491376	0.627966	0.520461	0.685068	0.625402	0.722832	0.477032	0.464489	0.675599	0.665516		0.689743	0.379495
Cell_0086	TFEB_TR	MK-2206 1000 nM	1.03836	1.59734	2.61553	0.816419	2.12078	1.65818	0.962369	1.6495	1.54145	0.572295	0.42302	0.714407	2.43465	1.15557	0.887935	1.15927	3.48719	1.4715	1.28881	1.34497	0.750891	1.21974	0.557653	1.9666	1.17712	1.75614	1.76561	2.65499	2.16217	0.700505	2.2168	0.844473	1.07717	1.15536	2.52311	1.4372	0.761862	0.526563	2.74783	1.80219	1.5359	0.30867	1.5124	1.48344		0.600329	0.603558
Cell_0086	FOXO_TR	MK-2206 1000 nM	1.15737	1.82667	1.16093	0.751784	1.09875	0.68119	0.719103	0.913231	0.980153	0.914267	0.954597	0.831506	0.991387	1.32199	0.889445	1.28444	0.968289	1.25906	1.23091	0.791819	1.5795	0.894281	0.991848	2.6158	0.804686	1.25195	2.1703	1.01795	1.11077	1.56846	1.02863	1.13645	2.40401	0.76465	1.43259	1.31266	1.10114	1.06773	2.0148	0.971439	1.00413	0.900774	1.05717	0.945375		1.19357	0.939875
Cell_0086	AMPKARt2	MK-2206 1000 nM	0.605902	0.531179	0.668035	0.49034	0.272497	0.509018	0.269234	0.482737	0.528567	0.621103	0.512308	0.224716	0.386459	0.561451	0.675135	0.662785	0.652612	0.384428	0.706716	0.712877	0.641817	0.581211	0.554429	0.608059	0.466805	0.674349	0.566149	0.70286	0.651703	0.66232	0.493432	0.455868	0.616763	0.164212	0.459848	0.634827	0.518697	0.711203	0.616031	0.718382	0.513659	0.397417	0.678809	0.683729		0.704999	0.362544
Cell_0087	TFEB_TR	MK-2206 1000 nM	1.18964	1.34869	3.00701	0.825009	2.12823	1.49647	1.03113	1.66799	1.49212	0.669984	0.535185	0.726975	2.01853	1.16877	0.874073	1.20323	3.55545	1.2867	1.43777	1.34955	0.922062	1.36808	0.664231	1.90148	1.14022	2.45496	1.95392	2.63942	3.95853	0.737973	1.35655	0.894832	1.07994	1.0997	2.2651	1.41837	0.785741	0.638608	3.12978	1.41378	1.45186		1.43869	0.952049		0.524119	0.603574
Cell_0087	FOXO_TR	MK-2206 1000 nM	1.15346	1.94798	1.14306	0.742598	2.53811	0.683348	0.737916	0.915611	0.975115	0.925411	1.10346	0.840104	0.940822	1.33946	0.80059	1.20646	0.978018	1.15773	1.24277	0.792615	1.56335	0.900363	0.97252	2.63356	0.783698	1.28451	2.10337	1.02391	1.11175	1.50938	1.1057	1.17934	2.43604	0.758894	1.39352	1.32081	1.19102	1.03619	2.00388	0.993968	0.979432		1.04547	0.973418		1.06705	0.921813
Cell_0087	AMPKARt2	MK-2206 1000 nM	0.625168	0.537745	0.670999	0.456511	0.440325	0.505676	0.221107	0.469235	0.525806	0.636731	0.508499	0.232281	0.392127	0.523132	0.67709	0.675728	0.665843	0.425127	0.719267	0.724959	0.631044	0.606398	0.534945	0.629145	0.474698	0.646722	0.575995	0.704414	0.642548	0.663313	0.517113	0.442196	0.605536	0.19004	0.481181	0.62097	0.504601	0.670191	0.607033	0.746678	0.53387		0.663391	0.679309		0.675983	0.311046
Cell_0088	TFEB_TR	MK-2206 1000 nM	1.10786	1.42435	2.73528	0.810678	2.08699	1.65751	0.694532	1.665	1.46461	0.674254	0.423244	0.713824	1.8221	1.13551	0.915489	1.19236	3.34285	1.47029	1.58672	1.2304	0.70671	1.18011	0.665162	2.03963	1.18389	4.05963	1.96759	1.85196	2.92001	0.737712	2.24497	0.916121	1.12532	1.05325	2.57996	1.73467	0.796594	0.643537	4.27831	1.23284	1.5124		1.57081	1.48725		0.483367	0.571242
Cell_0088	FOXO_TR	MK-2206 1000 nM	1.20377	2.13842	1.1886	0.726585	2.37899	0.687564	0.741099	0.889824	0.969202	1.02945	0.983917	0.86041	0.931051	1.31789	0.790954	1.24631	0.96259	1.08272	1.25463	0.779622	1.37834	0.893628	0.974772	2.57681	0.81877	1.23168	2.19795	0.957298	1.1282	1.50394	1.01283	1.13314	2.4519	0.732857	1.3929	1.21184	1.23184	1.04344	2.49323	0.951264	0.97471		0.952507	0.941027		1.02375	0.914034
Cell_0088	AMPKARt2	MK-2206 1000 nM	0.628373	0.514484	0.676092	0.474036	0.448908	0.501683	0.192938	0.453442	0.523639	0.615608	0.517513	0.225586	0.412287	0.562327	0.684806	0.645203	0.666228	0.422595	0.731819	0.721484	0.667884	0.581705	0.513592	0.640181	0.472306	0.647333	0.572033	0.732591	0.662082	0.659695	0.504652	0.443564	0.609054	0.195314	0.436507	0.538724	0.508479	0.689326	0.530646	0.747424	0.545799		0.680084	0.678091		0.685906	0.285583
Cell_0089	TFEB_TR	MK-2206 1000 nM	1.10141	1.62305	2.45377	0.840236	2.01134	1.60105	0.539918	1.66055	1.55281	0.634973	0.455472	0.714254	1.76012	1.10834	0.896882	1.07799	3.48785	1.44409	1.45498	1.07067	0.721868	1.29655	0.666093	1.56741	1.18417	1.87576	2.0083	1.568	2.49276	0.740392	3.76272	0.856485	1.02774	1.11012	2.69944	1.64439	0.761897	0.630428	5.99728	0.943283	1.50898		1.40842	1.20542		0.483874	0.541898
Cell_0089	FOXO_TR	MK-2206 1000 nM	1.17306	2.25925	1.18583	0.74757	2.36748	0.671538	0.733865	0.905448	1.0067	0.956049	1.02092	0.839235	0.933333	1.28876	0.813906	1.20228	0.991422	1.07719	1.1882	0.722099	1.18462	0.899553	0.977024	2.61112	0.790203	1.20054	2.22186	0.953229	1.11352	1.45749	1.0428	1.1254	2.38577	0.742043	1.39668	1.19437	1.2711	1.05602	2.49941	0.940408	0.964798		1.0239	0.90204		1.01499	0.841863
Cell_0089	AMPKARt2	MK-2206 1000 nM	0.5979	0.53114	0.688284	0.483309	0.465031	0.501512	0.152697	0.472441	0.488538	0.632475	0.526727	0.234203	0.412856	0.555797	0.682204	0.667281	0.675489	0.353851	0.711488	0.728311	0.653328	0.592296	0.492239	0.647795	0.447247	0.631494	0.57799	0.722587	0.647656	0.685044	0.512892	0.395875	0.599162	0.162242	0.404784	0.531662	0.544228	0.688784	0.546195	0.758908	0.516662		0.688647	0.665919		0.709493	0.259443
Cell_0090	TFEB_TR	MK-2206 1000 nM	1.05396	1.88343	2.45735	0.856533	1.96839	1.77011	1.01686	1.58974	1.52336	0.857045	0.432775	0.689716	1.628	1.11906	0.847643	1.15023	2.44714	1.3729	1.45231	1.05497	0.628535	1.34736	0.651842	1.94801	1.23764	2.01115	1.76577	1.96011	2.44322	0.721105	4.28209	0.898877	1.17308	1.12495	3.20338	1.51117	0.790329	0.588778	4.66151	1.80811	1.46795		1.45156	0.989655		0.384661	0.560838
Cell_0090	FOXO_TR	MK-2206 1000 nM	1.15213	2.33521	1.20197	0.760805	2.39342	0.696906	0.759206	0.863262	1.01902	1.12175	0.955562	0.820568	0.907496	1.33195	0.778097	1.1914	0.983645	1.00609	1.19269	0.710836	1.18047	0.92181	0.983016	2.69479	0.844629	1.23742	2.1186	1.00448	1.13043	1.42947	1.14141	1.15309	2.50429	0.754451	1.40164	1.27785	1.25841	1.0703	2.1945	0.901861	0.97688		1.03643	0.932721		0.98043	0.921523
Cell_0090	AMPKARt2	MK-2206 1000 nM	0.606172	0.536461	0.684966	0.496602	0.479093	0.514235	0.252774	0.481032	0.487375	0.633001	0.546938	0.233098	0.359994	0.527278	0.670056	0.668423	0.683512	0.387275	0.721063	0.728159	0.641106	0.605011	0.51374	0.645999	0.460766	0.598858	0.569532	0.702293	0.664434	0.673002	0.542245	0.440816	0.590943	0.181902	0.380099	0.549026	0.517858	0.701487	0.572155	0.756638	0.563363		0.670958	0.684818		0.710016	0.263597
Cell_0091	TFEB_TR	MK-2206 1000 nM	1.12633	2.35516	2.3982	0.846591	1.83744	1.95653	0.814799	0.651608	1.63589	0.662898	0.422917	0.690224	1.72053	1.15349	0.871384	1.17421	1.61465	1.39646	1.54455	1.06015	0.649582	1.3453	0.673545	1.9794	1.27915	2.14655	1.89219	1.55921	2.01827	0.741196	3.42666	0.922236	1.11882	1.02092	2.80356	1.5562	0.827343	0.510235	4.94036	1.6135	1.46172		1.29249	0.773891		0.345791	0.542763
Cell_0091	FOXO_TR	MK-2206 1000 nM	1.14789	2.66429	1.21588	0.751665	2.53312	0.712503	0.78039	1.96817	1.01478	0.926967	0.98083	0.840762	0.927037	1.33163	0.792824	1.18325	1.00559	0.991052	1.20293	0.737434	1.06482	0.900925	0.961397	2.56187	0.849659	1.2743	2.15131	1.04661	1.09555	1.51841	1.11786	1.1509	2.44229	0.7682	1.46552	1.27348	1.29568	1.07617	2.31105	0.935488	0.974357		0.98551	0.963402		0.943205	0.93033
Cell_0091	AMPKARt2	MK-2206 1000 nM	0.624796	0.520363	0.689742	0.505096	0.470391	0.503001	0.260525	0.6403	0.484507	0.636797	0.51852	0.232607	0.321144	0.545621	0.689817	0.663415	0.674552	0.374005	0.689954	0.732488	0.620381	0.600891	0.51278	0.64473	0.502945	0.566223	0.568414	0.712899	0.660305	0.665311	0.543323	0.41151	0.578826	0.103111	0.403848	0.543114	0.526598	0.66003	0.533217	0.783677	0.518934		0.668291	0.703717		0.713761	0.290388
Cell_0092	TFEB_TR	MK-2206 1000 nM	1.09079	2.8931	2.97869	0.844192	1.96855	1.98728	0.98235	0.67004	1.56662	0.637712	0.425426	0.69712	1.81074	1.09132	0.804901	1.16309	2.57789	1.34801	1.32513	1.12923	0.799937	1.43044	0.676374	2.13335	1.22874	2.46557	1.87173	2.54148	1.86852	0.747177	2.84655	0.946425	1.16094	1.06304	3.01813	1.59078	0.888833	0.63256	1.24203	1.39287	1.55722		1.20291	1.51282		0.420871	0.524233
Cell_0092	FOXO_TR	MK-2206 1000 nM	1.12403	2.34486	1.26116	0.744464	2.7285	0.736598	0.781409	2.00908	1.05663	0.924765	0.977071	0.837478	0.960658	1.3494	0.79565	1.20521	0.994176	0.975674	1.2016	0.756999	0.9924	0.898342	1.02348	2.03048	0.808104	1.14042	2.06895	1.06456	1.0873	1.52178	1.15528	1.20234	2.48052	0.734472	1.47043	1.30708	1.27254	1.05832	1.58664	0.929906	1.01148		0.89483	0.930619		0.95943	1.02443
Cell_0092	AMPKARt2	MK-2206 1000 nM	0.586365	0.51713	0.678498	0.44292	0.45952	0.519444	0.183834	0.642359	0.53387	0.632018	0.570619	0.263003	0.332813	0.556395	0.686875	0.670921	0.661815	0.451101	0.699574	0.724308	0.643477	0.581454	0.518425	0.67545	0.513649	0.597577	0.57764	0.698515	0.696267	0.686052	0.544328	0.429115	0.550866	0.128967	0.464957	0.541012	0.512736	0.666956	0.416878	0.774109	0.541407		0.65525	0.686936		0.7116	0.303736
Cell_0093	TFEB_TR	MK-2206 1000 nM	0.944942	2.99506	2.93063	0.849392	1.96637	1.82306	1.36153	0.63431	1.63012	0.654869	0.425098	0.684554	2.00314	1.09766	0.835779	1.16573	2.12513	1.33901	1.0338	1.13277	0.71876	1.42472	0.605862	1.80799	1.26824	1.9004	1.98884	2.30497	2.14018	0.683089	2.26644	0.965293	1.27862	1.13208	2.91687	1.51557	0.953582	0.59601	1.21057	1.80966	1.76957		1.35168	1.9541		0.446194	0.557908
Cell_0093	FOXO_TR	MK-2206 1000 nM	1.22117	1.96298	1.26294	0.743996	2.67125	0.724944	0.785762	2.02686	1.04659	0.964226	0.982529	0.822285	0.958616	1.34158	0.833651	1.1694	1.02653	1.00228	1.1803	0.755617	0.979361	0.894037	0.986517	1.65788	0.826611	1.01128	1.9864	1.06697	1.09706	1.4993	1.19269	1.22854	2.54822	0.747319	1.44289	1.25485	1.43294	1.13083	1.52849	0.960651	1.09686		1.00765	0.928498		0.954494	0.998606
Cell_0093	AMPKARt2	MK-2206 1000 nM	0.630866	0.531521	0.692287	0.486258	0.471904	0.501335	0.20369	0.640243	0.4942	0.6463	0.535991	0.243868	0.25975	0.549736	0.717795	0.669444	0.663134	0.433024	0.676681	0.731477	0.64493	0.5787	0.498432	0.665023	0.486407	0.637312	0.544294	0.691053	0.673291	0.688872	0.545333	0.421533	0.550377	0.106088	0.532046	0.528124	0.469743	0.682668	0.413654	0.792436	0.520814		0.673626	0.664034		0.72031	0.340267
Cell_0094	TFEB_TR	MK-2206 1000 nM	1.16274	3.84155	3.27663	0.863086	1.78451	1.98137	0.420595	0.663489	1.60196	0.652378	0.422205	0.69373	2.00518	1.01667	0.753952	1.1092	2.60531	1.529	1.19709	1.13646	0.700818	1.73841	0.899105	1.37299	1.27099	1.63412	2.02576	2.57555	2.14178	0.736393	3.54196	0.877653	1.36245	1.14813	2.63544	1.57973	0.830437	0.504199	1.23358	1.36037	1.74418		1.22308	1.76626		0.405656	0.542728
Cell_0094	FOXO_TR	MK-2206 1000 nM	1.16064	1.88482	1.25351	0.764992	2.44405	0.773521	0.770956	2.11867	1.00481	0.994931	0.980928	0.808539	1.00381	1.33191	0.815586	1.11506	1.04456	0.982571	1.14535	0.749447	1.00761	0.887654	1.01548	1.36349	0.843732	1.08877	2.0736	1.06154	1.09518	1.61601	1.20708	1.17765	2.59388	0.761564	1.4328	1.33545	1.2941	1.05815	1.5277	0.917517	1.08398		0.998065	0.948372		0.936094	0.976556
Cell_0094	AMPKARt2	MK-2206 1000 nM	0.605564	0.529707	0.688265	0.497283	0.458594	0.527089	0.205574	0.63582	0.503133	0.643505	0.515959	0.229312	0.295531	0.559588	0.717296	0.638235	0.657	0.430582	0.680185	0.739827	0.652196	0.57413	0.51691	0.650578	0.498037	0.638743	0.545166	0.695624	0.68327	0.671812	0.537379	0.416883	0.544715	0.210051	0.538347	0.518919	0.539311	0.675745	0.401431	0.779015	0.557925		0.680602	0.658806		0.709684	0.326804
Cell_0095	TFEB_TR	MK-2206 1000 nM	1.15097	3.17179	3.08617	0.853005	1.80176	2.1072	1.25511	0.686875	1.57092	0.635806	1.83012	0.711729	2.24795	1.02823	0.8274	1.16535	1.18624	1.34333	1.43696	1.16873	0.78249	1.49615	0.803565	1.72668	1.33513	1.6099	2.17975	6.65029	2.68147	0.740229	3.84554	0.9179	1.27765	1.24179	3.00552	1.5334	0.900878	0.412387	1.18178	1.26803	1.6313		1.24448	1.73396		0.356543	0.534289
Cell_0095	FOXO_TR	MK-2206 1000 nM	1.15794	1.77342	1.23454	0.741824	2.58592	0.772613	0.802889	1.9963	1.03561	0.957432	1.27544	0.821075	1.00544	1.27773	0.822927	1.13809	1.04088	0.970913	1.20455	0.757276	0.977194	0.898554	0.963994	1.24001	0.852665	1.05854	2.10076	1.18419	1.12525	1.57289	1.24027	1.19402	2.68204	0.802333	1.52523	1.37646	1.24768	0.985472	1.50894	0.898218	1.03391		1.02652	0.961848		0.938724	1.02179
Cell_0095	AMPKARt2	MK-2206 1000 nM	0.597816	0.539962	0.68344	0.494916	0.458055	0.508657	0.301829	0.640658	0.515224	0.629007	0.67212	0.249771	0.298794	0.572779	0.720597	0.681353	0.679693	0.40636	0.698753	0.732499	0.662953	0.546611	0.514979	0.642785	0.490034	0.635392	0.5544	0.691617	0.68197	0.672865	0.546974	0.412825	0.545781	0.166585	0.499556	0.517472	0.5367	0.668823	0.403909	0.773781	0.523479		0.684694	0.661221		0.725254	0.337167
Cell_0096	TFEB_TR	MK-2206 1000 nM	1.22342	3.41556	3.05617	0.843853	1.92527	2.18647	0.786565	0.789815	1.58908	0.605688	1.44989	0.675694	2.4499	1.01823	0.848927	1.16287	2.83177	1.49959	0.718133	1.23223	0.689426	1.83432	0.756607	1.83479	1.36443	1.60545	2.10796	0.847766	1.82449	0.678478	3.73704	0.921847	1.43214	1.31934	3.07579	1.38325	0.934289	0.730193	1.13095	0.979301	1.69372	0.670417	1.38127	1.7675		0.400209	0.53324
Cell_0096	FOXO_TR	MK-2206 1000 nM	1.16099	1.86286	1.26562	0.750879	2.75946	0.796994	0.832454	1.93005	0.986112	0.953788	1.19192	0.789565	1.01944	1.32307	0.855531	1.11203	1.05157	0.984922	1.19791	0.775192	0.937689	0.892148	1.02484	1.07883	0.846497	1.00918	1.75854	1.12035	1.16195	1.56584	1.31032	1.22001	2.69263	0.821775	1.47238	1.54166	1.22696	1.10572	1.38912	0.87318	1.11165	2.00458	0.997092	0.981441		0.916291	0.977625
Cell_0096	AMPKARt2	MK-2206 1000 nM	0.606195	0.543574	0.686782	0.511991	0.451558	0.534238	0.31369	0.616221	0.508398	0.636989	0.646956	0.257549	0.295598	0.562938	0.71081	0.651188	0.648316	0.395694	0.681249	0.727155	0.639837	0.601059	0.495716	0.639122	0.4953	0.620027	0.559612	0.70547	0.677484	0.670781	0.544514	0.417348	0.532778	0.128495	0.511273	0.53804	0.557654	0.672972	0.394415	0.760183	0.556827	0.634047	0.698361	0.674477		0.713401	0.348136
Cell_0097	TFEB_TR	MK-2206 1000 nM	1.16391	4.1773	3.17988	0.828986	1.97082	2.15592	0.885293	0.784211	1.57467	0.625641	1.55439	0.643288	2.21885	0.987353	0.85565	1.13185	2.41935	1.22422	1.67612	1.31123	0.61516	1.50107	0.950575	1.85144	1.35427	1.63777	1.96974	0.781167	1.70572	0.668552	3.64706	0.93912	1.38272	1.18115	3.23951	1.57186	0.980175	0.530661	1.11569	1.00426	1.78391	0.722326	1.19989	2.80525		0.399138	0.553143
Cell_0097	FOXO_TR	MK-2206 1000 nM	1.15136	2.13418	1.26788	0.750209	2.84808	0.754567	0.802455	1.76108	1.02716	0.952556	1.12754	0.764193	1.04506	1.3098	0.826068	1.14724	1.03321	0.951885	1.22202	0.790062	0.950693	0.881832	1.03103	1.08432	0.822934	1.00806	1.49535	1.09672	1.14346	1.77366	1.27247	1.22698	2.7445	0.805847	1.47414	1.53355	1.2084	1.03105	1.32206	0.855313	1.0929	1.98697	0.992718	0.964576		0.948627	1.04784
Cell_0097	AMPKARt2	MK-2206 1000 nM	0.582597	0.53086	0.697878	0.515009	0.45406	0.527341	0.283381	0.627903	0.50387	0.640708	0.651885	0.247532	0.271492	0.592999	0.705037	0.687654	0.645537	0.443322	0.693855	0.72604	0.664522	0.550126	0.516466	0.649903	0.483791	0.621751	0.590335	0.706595	0.684061	0.700448	0.542594	0.447166	0.528521	0.14585	0.491413	0.504245	0.563123	0.638605	0.395265	0.765095	0.547967	0.627082	0.712777	0.641654		0.726036	0.298838
Cell_0098	TFEB_TR	MK-2206 1000 nM	1.11685	3.04172	4.1107	0.84261	1.97063	2.1704	1.05346	0.789777	1.56843	0.555263	1.49502	0.619539	2.25642	0.996439	0.787461	1.25372	2.02124	1.43566	1.25732	1.25819	0.558688	1.64552	0.851111	1.78006	1.30916	1.69926	1.90655	0.714567	1.85649	0.693974	4.35292	0.86856	1.53968	1.10007	2.83935	1.64626	0.945604	0.355902	1.09938	1.94164	1.93526	0.710803	1.22781	1.51801		0.431144	0.537042
Cell_0098	FOXO_TR	MK-2206 1000 nM	1.17066	2.16043	1.2887	0.747637	2.88178	0.776345	0.787422	1.76423	1.00824	0.968708	1.11893	0.749514	1.10818	1.30309	0.785326	1.13804	1.05447	0.97366	1.21311	0.770361	0.92359	0.874586	1.01937	1.0642	0.807113	0.944277	1.33693	1.07309	1.15175	1.80511	1.24295	1.18571	2.64664	0.775392	1.44447	1.57245	1.18216	1.01028	1.32912	0.915622	1.12166	1.85349	1.03528	0.987774		0.96009	1.15261
Cell_0098	AMPKARt2	MK-2206 1000 nM	0.601013	0.554164	0.669303	0.463432	0.446046	0.543554	0.311383	0.634729	0.511023	0.638271	0.649712	0.27219	0.306244	0.558912	0.699353	0.638254	0.650868	0.421498	0.68923	0.715441	0.662994	0.555415	0.501903	0.655144	0.455705	0.611101	0.57694	0.70772	0.649444	0.687368	0.552376	0.413713	0.52249	0.177526	0.466091	0.502092	0.521581	0.668785	0.388177	0.761191	0.577417	0.605899	0.68856	0.657592		0.743519	0.279065
Cell_0099	TFEB_TR	MK-2206 1000 nM	1.12105	2.75468	3.97118	0.859809	2.10277	2.07598	0.473304	0.787733	1.51846	0.626513	2.59862	0.601183	2.46577	0.53353	0.863471	1.26923	1.77235	1.10295	0.96863	1.32354	0.50258	1.49019	0.932236	2.16582	1.26283	1.88928	1.77897	0.647968	1.80215	0.751579	3.34586	0.795	1.39218	1.23916	2.60476	1.63187	0.948198	0.405627	1.07687	1.19396	1.83067	0.694232	1.15025	1.77285		0.510958	0.544117
Cell_0099	FOXO_TR	MK-2206 1000 nM	1.18863	2.29202	1.32869	0.771723	2.96578	0.768325	0.85327	1.72611	0.986374	0.973438	1.07393	0.72711	1.11515	1.52859	0.853606	1.13399	1.01035	0.952136	1.24007	0.781999	0.942592	0.887582	1.07025	1.02071	0.789473	1.08277	1.17874	1.04946	1.18723	1.79566	1.29593	1.14866	2.62767	0.773625	1.45254	1.54018	1.20765	1.12593	1.23937	0.901471	1.17193	1.97443	1.07107	0.996476		0.937518	1.11485
Cell_0099	AMPKARt2	MK-2206 1000 nM	0.596708	0.559083	0.663234	0.454469	0.456429	0.521041	0.35828	0.667979	0.516389	0.628465	0.628833	0.272555	0.380218	0.662144	0.711938	0.652682	0.671334	0.427198	0.666445	0.717604	0.671287	0.570656	0.543124	0.656666	0.463858	0.654293	0.57897	0.708845	0.66038	0.66008	0.558945	0.429663	0.578163	0.148265	0.476272	0.51751	0.531556	0.652444	0.40282	0.753916	0.548205	0.58446	0.684678	0.67133		0.723521	0.260486
Cell_0100	TFEB_TR	MK-2206 1000 nM	1.11561	3.03541	3.93683	0.840245	2.02048	2.20849	0.645753	0.814575	1.50078	0.737769	1.52536	0.629253	2.11949	0.569918	0.91511	1.26592	1.46681	1.31506	1.47934	1.26192	0.572001	1.51855	1.1299	1.08599	1.27639	1.48495	1.71947	0.887887	2.09214	0.742115	3.55406	0.822168	1.31664	1.27597	3.26546	1.62125	0.977073	0.405021	1.10605	1.35942	2.29226	0.759751	1.29706	1.98664	1.08849	0.459981	0.552542
Cell_0100	FOXO_TR	MK-2206 1000 nM	1.15845	2.76322	1.29811	0.774659	2.88391	0.782624	0.859278	1.62414	0.961104	1.01557	1.11411	0.741089	1.13767	1.67941	0.854413	1.17457	0.968699	0.936891	1.23245	0.753952	0.954746	0.897711	1.09023	1.00938	0.813581	1.00223	1.08831	1.01321	1.15151	1.39213	1.31341	1.14631	2.55821	0.801761	1.47757	1.54133	1.19521	1.13894	1.28367	0.904758	1.12407	1.97966	1.38038	0.980323	3.10638	0.924743	1.10119
Cell_0100	AMPKARt2	MK-2206 1000 nM	0.618655	0.554234	0.652942	0.501892	0.470244	0.518496	0.341528	0.650432	0.49433	0.636673	0.636254	0.228624	0.427309	0.645872	0.682886	0.648935	0.665151	0.457549	0.671772	0.720929	0.664317	0.567353	0.523668	0.656747	0.48547	0.636045	0.582175	0.703482	0.65393	0.685109	0.558614	0.434061	0.625457	0.105096	0.434868	0.514127	0.546881	0.66863	0.39396	0.753403	0.552791	0.560008	0.690227	0.681892	0.663517	0.71258	0.233559
Cell_0101	TFEB_TR	MK-2206 1000 nM	1.09308	3.14278	4.03354	0.857741	2.043	2.0985	0.644311	0.793065	1.50575	0.749944	2.06933	0.620062	2.07806	0.612091	0.774965	1.34481	2.02361	1.16683	1.35431	1.15147	0.564677	1.50967	1.06023	1.86354	1.28995	1.36808	1.66644	0.666552	2.15595	0.653395	3.44457	0.817224	1.40688	1.21701	2.43557	1.64371	1.05091	0.404415	1.15756	1.20555	2.20272	0.783463	1.44294	2.02498	1.07033	0.386687	0.565729
Cell_0101	FOXO_TR	MK-2206 1000 nM	1.08234	2.5869	1.31887	0.792254	2.93233	0.786233	0.860331	1.63464	0.950958	1.07399	1.18997	0.733956	1.11688	1.63781	0.850872	1.18973	1.01331	0.931382	1.23496	0.722918	0.959213	0.889791	1.07599	1.0068	0.83769	0.962385	1.01342	0.934969	1.18686	1.04197	1.31099	1.14421	2.68025	0.811056	1.43474	1.66531	1.25674	1.15194	1.318	0.916051	1.16632	2.07429	1.23116	1.00128	2.99018	0.962235	1.12599
Cell_0101	AMPKARt2	MK-2206 1000 nM	0.612893	0.55628	0.664889	0.468788	0.453402	0.523211	0.360348	0.645137	0.496537	0.632819	0.640091	0.234659	0.491679	0.665678	0.717471	0.609903	0.669234	0.430887	0.696625	0.707356	0.668623	0.570662	0.556887	0.666465	0.507081	0.62361	0.56702	0.708416	0.656173	0.716791	0.568925	0.409246	0.656119	0.162028	0.443047	0.503942	0.505149	0.684817	0.391106	0.749316	0.573342	0.527389	0.672825	0.665479	0.669518	0.717571	0.233268
Cell_0102	TFEB_TR	MK-2206 1000 nM	1.10679	2.604	3.13091	0.842295	1.98804	2.14696	0.706389	0.836034	1.54558	0.732269	3.70015	0.594755	1.65737	0.54761	0.873371	1.43695	1.64363	1.45918	1.45088	1.24124	0.804569	1.71793	0.820661	1.78964	1.30458	1.3585	1.61559	0.801733	1.9899	0.649019	3.44468	0.823272	1.78191	1.37937	2.50399	1.81068	0.963364	0.464972	1.19557	1.21817	2.12531	0.867177	1.59543	2.13885	1.16287	0.457897	0.600196
Cell_0102	FOXO_TR	MK-2206 1000 nM	1.07568	1.84775	1.37959	0.771961	3.01727	0.804377	0.939352	1.8141	0.976894	1.09674	1.19423	0.726845	1.09055	1.59442	0.870605	1.30242	1.04473	0.936818	1.21293	0.720807	0.924128	0.903185	1.07555	1.00071	0.853245	1.00153	1.00184	0.975569	1.17506	0.878015	1.26395	1.15997	2.5476	0.861352	1.46946	1.88568	1.25071	1.19266	1.33479	0.915808	1.17656	2.04779	1.12181	0.978032	3.2148	1.00955	1.0856
Cell_0102	AMPKARt2	MK-2206 1000 nM	0.610237	0.539364	0.664424	0.450311	0.473954	0.534002	0.377481	0.634046	0.509509	0.637962	0.638564	0.218471	0.448869	0.658562	0.708664	0.65902	0.68142	0.429782	0.684286	0.714774	0.652097	0.557976	0.57535	0.670525	0.540708	0.616291	0.561641	0.700583	0.654606	0.687991	0.563473	0.433599	0.630635	0.0834427	0.438102	0.505498	0.507813	0.68783	0.37189	0.760781	0.55431	0.466916	0.686413	0.692304	0.663876	0.740935	0.191345
Cell_0103	TFEB_TR	MK-2206 1000 nM	1.0203	2.75928	3.73849	0.825431	1.96505	2.16901	0.82193	0.815853	1.51876	0.722604	2.54097	0.598593	1.57411	0.559549	0.874654	1.39324	0.958712	1.37382	1.92506	1.22747	0.814363	1.50579	0.873146	1.12834	1.34698	1.59472	1.57145	0.770977	1.28612	0.62541	3.76339	0.856704	1.593	1.35111	2.46702	1.25169	1.22508	0.476636	1.31225	1.69222	3.27406	0.78239	1.43854	1.36729	1.05962	0.36549	0.578691
Cell_0103	FOXO_TR	MK-2206 1000 nM	1.08091	1.40391	1.32791	0.769625	3.08925	0.824802	0.902454	1.85665	0.998482	1.05302	1.19253	0.748118	1.13968	1.58704	0.880858	1.22456	2.60234	1.01272	1.23907	0.706773	0.922499	0.897046	1.05767	1.01418	0.879318	1.14769	0.93469	0.995064	1.18696	0.82982	1.30247	1.16686	2.70077	0.807193	1.43881	2.00631	1.31653	1.19449	1.43719	0.940822	1.16256	2.08898	1.13395	1.08391	3.18122	0.987207	1.17659
Cell_0103	AMPKARt2	MK-2206 1000 nM	0.598591	0.579266	0.682873	0.465881	0.466836	0.531159	0.38132	0.644322	0.544924	0.633513	0.607982	0.243443	0.521505	0.675738	0.712781	0.649926	0.634968	0.396667	0.680439	0.698791	0.661112	0.516323	0.53049	0.699196	0.509028	0.603346	0.551321	0.708587	0.662324	0.698148	0.565565	0.448359	0.612755	0.105802	0.456738	0.538762	0.493619	0.65924	0.355566	0.749121	0.555901	0.479983	0.691284	0.685621	0.637457	0.737269	0.224376
Cell_0104	TFEB_TR	MK-2206 1000 nM	1.11394	1.824	4.54514	0.784899	2.07061	2.13974	0.91452	0.77791	1.57969	0.741603	3.97828	0.611968	1.57824	0.527733	0.864013	1.3893	1.13015	1.34675	1.42491	1.24327	0.666433	1.55909	0.969929	1.32015	1.3063	1.64074	1.55709	0.702764	2.53619	0.588345	3.08406	0.827838	1.42752	1.3419	2.71824	2.02819	1.2879	0.467118	1.37843	1.60706	2.86603	0.850762	1.46222	1.22411	1.0426	0.446134	0.607872
Cell_0104	FOXO_TR	MK-2206 1000 nM	1.08732	1.12214	1.35322	0.732522	3.16649	0.827429	0.977241	1.7463	1.02456	1.07951	1.16198	0.734071	1.15148	1.56355	0.89583	1.21759	2.73316	0.931487	1.24447	0.725399	0.994767	0.926391	1.07103	0.988133	0.865289	1.0899	0.917536	0.987046	1.19769	0.786017	1.27413	1.16847	2.1479	0.838971	1.41227	1.76012	1.37203	1.14115	1.49211	0.92967	1.18791	2.172	1.23102	1.02663	2.98282	1.02096	1.16807
Cell_0104	AMPKARt2	MK-2206 1000 nM	0.576851	0.611729	0.668098	0.48543	0.463812	0.526288	0.420421	0.65394	0.529473	0.647457	0.632565	0.191884	0.453576	0.648941	0.691986	0.650917	0.601618	0.404519	0.691709	0.713544	0.659126	0.578455	0.538715	0.679789	0.521857	0.629995	0.589146	0.711066	0.665524	0.690601	0.561274	0.462904	0.653956	0.103546	0.497805	0.491132	0.470387	0.683899	0.343373	0.758327	0.566962	0.401984	0.681634	0.682121	0.656262	0.740314	0.310423
Cell_0105	TFEB_TR	MK-2206 1000 nM	1.06295	1.64372	3.82442	0.81384	2.15751	2.14355	1.11349	0.811047	1.51987	0.766951	1.49451	0.566936	1.38582	0.524199	0.834472	1.44855	1.28023	1.56441	1.66015	1.23573	0.734072	1.64622	0.90841	1.29463	1.34045	1.66691	1.50284	0.758009	1.50002	0.578734	2.9941	0.796084	1.63411	1.19116	2.97953	1.76039	1.35946	0.568384	1.39504	1.90031	2.97138	0.882663	1.38378	2.25348	1.154	0.44958	0.575171
Cell_0105	FOXO_TR	MK-2206 1000 nM	1.05846	0.9492	1.2993	0.775884	3.29115	0.850713	0.826735	1.80455	1.00431	1.07535	1.15965	0.72499	1.09819	1.57525	0.898755	1.34518	2.57189	0.998035	1.23631	0.721797	0.948615	0.932548	1.07966	0.997081	0.963135	1.12603	0.9011	1.03922	1.17044	0.782213	1.30632	1.12808	1.73361	0.794489	1.40286	1.72394	1.33896	1.11321	1.42658	0.982597	1.23542	2.27332	1.35747	0.88534	2.98884	0.992555	1.11494
Cell_0105	AMPKARt2	MK-2206 1000 nM	0.582309	0.603332	0.680111	0.477731	0.450882	0.534028	0.377136	0.656454	0.509829	0.625535	0.644084	0.283291	0.500123	0.678883	0.704666	0.618405	0.611886	0.436958	0.690505	0.712796	0.621063	0.589387	0.515673	0.692775	0.473463	0.616948	0.572803	0.710618	0.654177	0.675686	0.584959	0.487735	0.643916	0.155153	0.493131	0.517037	0.472011	0.641903	0.342622	0.744501	0.568126	0.404358	0.690382	0.688772	0.654118	0.734618	0.348184
Cell_0106	TFEB_TR	MK-2206 1000 nM	1.05593	1.49475	4.57496	0.772917	2.14018	2.07656	0.927253	0.791207	1.61019	0.808915	1.991	0.579051	1.56365	0.560283	0.898836	1.42968	1.24349	1.38235	1.50098	1.22306	0.762123	1.50452	0.966128	1.24445	1.36487	1.95538	1.50595	0.673527	1.64096	0.598009	3.25551	0.886972	1.37328	1.18966	2.25355	1.48191	1.26722	0.549173	1.43098	1.68469	2.75276	0.831234	1.34299	2.30308	1.18146	0.564442	0.575528
Cell_0106	FOXO_TR	MK-2206 1000 nM	1.0587	0.858777	1.3101	0.740603	2.96139	0.848703	0.866244	1.80111	1.05662	1.08808	1.19649	0.7359	1.17355	1.59311	0.883347	1.26608	2.42174	0.95032	1.22624	0.741006	0.93372	0.911127	1.03058	0.99037	0.924271	1.39403	0.890039	1.00061	1.2031	0.816321	1.31757	1.18599	1.40233	0.757813	1.39199	1.77712	1.44719	1.09911	1.39002	1.02555	1.25785	2.2591	1.27845	0.900995	2.68262	0.965911	1.1457
Cell_0106	AMPKARt2	MK-2206 1000 nM	0.57005	0.576164	0.688645	0.473928	0.434306	0.525117	0.372402	0.633916	0.52128	0.616937	0.622714	0.235647	0.47639	0.657699	0.73296	0.656071	0.619224	0.399629	0.677235	0.710782	0.661532	0.534445	0.539646	0.671928	0.460318	0.555716	0.571942	0.714094	0.67299	0.677196	0.578598	0.470811	0.650257	0.161811	0.5261	0.527761	0.481565	0.679768	0.321539	0.717842	0.578495	0.419754	0.67889	0.67259	0.703519	0.729246	0.309393
Cell_0107	TFEB_TR	MK-2206 1000 nM	1.04146	1.33606	3.25838	0.789712	2.26235	2.4075	0.752626	0.753495	1.65389	0.779219	2.08986	0.583129	1.78313	0.507584	0.832267	1.36917	1.05049	1.38311	0.928071	0.904693	0.649621	1.84203	1.12594	1.55409	1.47218	1.83294	1.46794	0.776301	3.32631	0.602297	3.02402	0.918651	1.29814	1.15088	2.60562	1.20342	1.54789	0.346841	1.43328	3.05202	2.69144	0.914402	1.37581	1.44365	1.15592	0.506987	0.558828
Cell_0107	FOXO_TR	MK-2206 1000 nM	1.03308	0.791933	1.34429	0.754797	2.26252	0.920583	0.826505	1.74108	1.0825	1.10728	1.1783	0.754913	1.2089	1.51979	0.846825	1.27471	2.31326	0.992521	1.21365	2.45634	0.974572	0.908403	1.02314	1.00523	1.00699	1.02373	0.879504	0.960445	1.18542	0.783835	1.4562	1.15986	1.27632	0.737854	1.4381	1.83031	1.35882	1.15025	1.31184	1.04518	1.23679	2.28694	1.24387	0.97242	2.69347	0.979561	1.06234
Cell_0107	AMPKARt2	MK-2206 1000 nM	0.572004	0.584449	0.674827	0.49581	0.498261	0.533095	0.360021	0.656053	0.488929	0.637238	0.65099	0.224892	0.408657	0.658191	0.711514	0.654363	0.624344	0.3942	0.690893	0.707123	0.644123	0.545584	0.516969	0.694206	0.482503	0.630696	0.56847	0.682593	0.659825	0.683399	0.578664	0.468715	0.66533	0.179654	0.516166	0.538486	0.518833	0.662699	0.336142	0.70831	0.581965	0.402075	0.686798	0.676661	0.669585	0.727732	0.341504
Cell_0108	TFEB_TR	MK-2206 1000 nM	0.954324	1.28942	2.65	0.758148	2.1891	2.13406	0.794581	0.806973	1.6001	0.777001	2.87528	0.589864	1.85635	0.509417	0.792326	1.39875	1.13134	1.28038	1.08947	0.885987	0.710554	1.41208	0.878639	1.10107	1.55785	2.40315	1.42782	0.735463	1.93235	0.550646	2.64357	0.905233	1.29273	1.12858	3.05619	1.37298	1.48009	0.56042	1.45398	2.79151	2.23425	1.20676	1.48099	1.87819	1.24568	0.513613	0.575475
Cell_0108	FOXO_TR	MK-2206 1000 nM	1.05714	0.698061	1.32369	0.737178	1.80683	0.912592	0.848059	2.03188	1.09231	1.08479	1.25144	0.801317	1.25198	1.51448	0.821638	1.2922	2.2616	0.92679	1.26391	2.29445	0.941494	0.943303	1.0465	1.02434	1.11082	1.3815	0.877537	0.982369	1.17201	0.750879	1.47415	1.16667	1.16588	0.741723	1.43328	1.6549	1.48397	1.21053	1.26934	1.04307	1.33612	2.53993	1.02091	0.868074	2.62847	0.950223	1.10041
Cell_0108	AMPKARt2	MK-2206 1000 nM	0.599271	0.573658	0.669584	0.478484	0.517114	0.522886	0.365159	0.638549	0.536904	0.630952	0.668193	0.235437	0.440057	0.672519	0.732476	0.61778	0.611826	0.470926	0.692006	0.694307	0.637892	0.57103	0.526245	0.690454	0.45784	0.49266	0.567397	0.693651	0.667603	0.660548	0.591491	0.423485	0.665249	0.152841	0.501666	0.578653	0.501665	0.667212	0.321912	0.723633	0.513781	0.456564	0.702596	0.656975	0.684239	0.726158	0.326612
Cell_0109	TFEB_TR	MK-2206 1000 nM	1.0979	1.13331	4.43964	0.781475	1.84627	2.13977	0.890728	0.760634	1.62111	0.803303	2.12753	0.623426	2.02002	0.477875	0.785755	1.41121	1.21811	1.2872	1.75176	0.907243	0.526733	1.86515	1.00137	1.30674	1.44525	1.7681	1.40872	0.870952	2.12258	0.555719	2.69263	0.999379	1.29171	1.18629	2.58064	1.31574	2.68162	0.60091	1.45931	2.87918	2.53339	1.20409	1.52183	0.786088	1.35854	0.43458	0.599234
Cell_0109	FOXO_TR	MK-2206 1000 nM	1.05122	0.646702	1.30303	0.745311	1.45373	0.867422	0.861359	2.03054	1.15619	1.08384	1.27409	0.811591	1.28019	1.47545	0.818529	1.26936	2.32001	0.926226	1.26555	2.31103	0.929972	0.946649	1.00499	1.02161	1.02829	1.11198	0.859498	1.01623	1.15283	0.785105	1.438	1.2013	1.14639	0.773572	1.30565	1.51262	1.33196	1.19692	1.17954	1.06375	1.30262	2.53411	1.04468	0.997191	2.8266	0.956377	1.03659
Cell_0109	AMPKARt2	MK-2206 1000 nM	0.578327	0.584707	0.649219	0.476556	0.514327	0.519524	0.342662	0.634907	0.521401	0.632201	0.665964	0.19965	0.429006	0.681346	0.707741	0.642204	0.62374	0.453807	0.692111	0.675198	0.642678	0.529638	0.494629	0.689543	0.477017	0.661069	0.578309	0.710405	0.653211	0.693943	0.5788	0.424189	0.671604	0.134065	0.469581	0.587068	0.544975	0.642032	0.321389	0.715833	0.613981	0.483795	0.688267	0.665324	0.686254	0.743804	0.305509
Cell_0110	TFEB_TR	MK-2206 1000 nM	0.885974	1.13362	4.5481	0.7669	1.54389	2.23911	0.720512	0.803946	1.70968	0.935647	2.6309	0.614338	2.16786	0.490662	0.897824	1.59058	1.21874	1.32951	1.47546	0.905089	0.643945	1.69519	1.09331	1.23421	1.46529	2.00108	1.37792	0.879019	1.98578	0.53092	3.05999	1.03275	1.34748	1.19506	2.10509	1.3525	2.16773	0.494776	1.4628	3.14411	3.00689	1.26384	1.50346	1.07037	1.41762	0.515672	0.601345
Cell_0110	FOXO_TR	MK-2206 1000 nM	1.03672	0.683055	1.32535	0.726773	1.21729	0.90298	0.848029	2.06913	1.18733	1.20396	1.38325	0.815227	1.27057	1.66492	0.868182	1.3278	2.45139	0.965607	1.25574	2.37944	0.914285	0.967827	1.03799	1.03067	1.02599	1.26591	0.864257	0.99587	1.15835	0.698932	1.46585	1.23696	1.17176	0.745375	1.17801	1.32689	1.29672	1.18048	1.14786	1.06829	1.30825	2.55341	1.04662	0.921875	2.98636	0.981095	0.999271
Cell_0110	AMPKARt2	MK-2206 1000 nM	0.565421	0.547374	0.659393	0.470666	0.48477	0.533741	0.325892	0.639834	0.548297	0.628248	0.671488	0.204504	0.469003	0.666636	0.720124	0.645382	0.655712	0.434364	0.704838	0.68076	0.631572	0.55507	0.495267	0.706626	0.462517	0.608131	0.551538	0.691365	0.661822	0.696115	0.582022	0.442706	0.675409	0.151686	0.437496	0.590058	0.524614	0.654006	0.338733	0.726003	0.58097	0.547796	0.68865	0.692799	0.679505	0.745267	0.306756
Cell_0111	TFEB_TR	MK-2206 1000 nM	0.890632	1.04597	5.29004	0.764285	1.39582	2.28463	0.901698	0.823008	1.68867	0.774652	2.72707	0.63037	1.86764	0.523161	0.845469	1.4218	1.17284	1.45137	1.48556	0.9698	0.766964	1.41904	1.25791	1.08914	1.47948	2.21714	1.39437	0.788533	2.69399	0.542892	2.66808	1.1444	1.29258	1.14895	2.69404	1.25437	3.40637	0.561931	1.47701	3.40905	3.48038	0.956352	1.37631	2.44639	1.57674	0.447287	0.607301
Cell_0111	FOXO_TR	MK-2206 1000 nM	1.1036	0.688929	1.30802	0.737575	1.09046	0.901243	0.833864	1.63821	1.18749	1.09418	1.38493	0.851763	1.27042	1.73097	0.921082	1.29004	2.47102	0.987746	1.28584	2.61243	0.984229	0.974023	3.52898	1.01316	1.00854	1.31485	0.873816	1.01842	1.17865	0.713826	1.45026	1.26641	1.21649	0.767034	1.22659	1.27415	1.36304	1.18894	1.15485	1.07283	1.31388	2.50192	1.04798	0.947243	3.13769	1.012	1.06094
Cell_0111	AMPKARt2	MK-2206 1000 nM	0.584567	0.567231	0.665562	0.475645	0.487079	0.523157	0.326267	0.64514	0.528293	0.636838	0.633574	0.25543	0.474535	0.676604	0.724461	0.635609	0.649322	0.367732	0.692582	0.679333	0.614128	0.561654	0.528657	0.700739	0.48532	0.427195	0.561431	0.714518	0.671693	0.6874	0.59836	0.433676	0.692046	0.126034	0.365876	0.586762	0.526067	0.651921	0.306326	0.736174	0.547958	0.561771	0.700653	0.677319	0.681961	0.739096	0.313558
Cell_0112	TFEB_TR	MK-2206 1000 nM	0.910654	1.11354	5.34026	0.771851	1.33759	2.18374	0.608679	0.736734	1.65448	0.767535	1.77386	0.629683	1.7428	0.523887	0.907423	1.67462	1.06903	1.28542	1.316	1.02115	0.77536	1.29209	1.27851	1.28941	1.39767	1.67324	1.32632	1.05548	1.40861	0.521848	2.96541	1.09503	1.26452	1.20504	2.70741	1.21726	3.21083	0.614555	1.51821	3.69887	2.67717	1.10065	1.47552	2.03529	1.66407	0.525741	0.59359
Cell_0112	FOXO_TR	MK-2206 1000 nM	1.0648	0.699213	1.33357	0.727516	1.00404	0.892469	0.864255	1.20686	1.17473	1.11681	1.4306	0.854843	1.24995	1.70125	0.942866	1.30537	2.47406	0.873037	1.34	2.55387	1.00824	0.968802	3.46999	1.01895	0.931939	1.14711	0.83721	1.02087	1.20096	0.723132	1.43326	1.25671	1.1374	0.758742	1.29297	1.17577	1.32674	1.18809	1.10373	1.08961	1.32976	2.49109	1.09876	1.00148	3.09969	1.02726	1.02484
Cell_0112	AMPKARt2	MK-2206 1000 nM	0.576295	0.576257	0.652143	0.471495	0.478253	0.519855	0.317545	0.660108	0.552751	0.625653	0.655609	0.305197	0.465211	0.672402	0.746144	0.625742	0.629881	0.403537	0.693051	0.671548	0.622008	0.560865	0.536311	0.696535	0.471325	0.615308	0.558129	0.713293	0.668777	0.673945	0.600362	0.445945	0.682629	0.102562	0.457529	0.580951	0.530021	0.658702	0.32545	0.727969	0.54759	0.583535	0.711171	0.683562	0.675523	0.730258	0.300539
Cell_0113	TFEB_TR	MK-2206 1000 nM	1.02592	1.08049	5.04191	0.783073	1.28089	2.21748	0.860056	0.697851	1.64831	0.953588	1.3232	0.65312	1.88411	0.546929	0.884678	1.77358	1.13819	1.37731	1.5107	1.13204	0.789389	1.31134	1.31284	1.33583	1.4557	1.48451	1.29205	1.06149	1.92558	0.518328	2.79366	1.1065	1.20282	1.19327	2.48744	1.26231	3.13242	0.539982	1.4505	3.55623	2.8092	1.11166	1.39179	1.50827	1.44002	0.66418	0.578425
Cell_0113	FOXO_TR	MK-2206 1000 nM	1.08399	0.694731	1.28223	0.767263	0.932624	0.918306	0.835034	0.966588	1.16953	1.19611	1.4166	0.889789	1.29387	1.78186	0.936511	1.30834	2.5316	0.885462	1.29795	2.47698	1.06148	0.973778	3.43961	1.04222	1.01771	1.09584	0.86404	1.03343	1.1877	0.682184	1.49434	1.244	1.12064	0.75124	1.33447	1.09755	1.37622	1.19989	0.963971	1.13517	1.26633	2.42269	1.03197	0.992349	2.89726	1.02907	1.03721
Cell_0113	AMPKARt2	MK-2206 1000 nM	0.562882	0.58105	0.676635	0.477689	0.472251	0.53825	0.372259	0.665614	0.548201	0.6287	0.667648	0.311314	0.453142	0.681812	0.727798	0.625017	0.659031	0.401222	0.659836	0.664861	0.633505	0.551325	0.543407	0.686958	0.510795	0.629206	0.567523	0.708472	0.654458	0.685659	0.60268	0.450691	0.701848	0.14482	0.436767	0.560663	0.526885	0.673954	0.349297	0.72517	0.553093	0.602393	0.701701	0.693675	0.664799	0.745519	0.335967
Cell_0114	TFEB_TR	MK-2206 1000 nM	1.0865	1.04648	5.45691	0.79022	1.28317	2.01895	0.709641	0.67023	1.66867	0.780913	2.55099	0.609085	1.77721	0.548714	0.868908	1.51873	1.17864	1.37107	1.59551	1.25748	0.622278	1.72151	1.40214	1.58414	1.37868	1.62688	1.27835	0.766642	1.72108	0.484137	2.72685	1.08885	1.22827	1.16922	4.16221	1.26634	2.57448	0.681375	1.426	4.64799	2.77625	1.09254	1.34899	2.05974	1.72434	0.511407	0.571243
Cell_0114	FOXO_TR	MK-2206 1000 nM	1.16382	0.683889	1.25561	0.768821	0.890276	0.913659	0.882782	0.979095	1.16598	1.10483	1.37869	0.865193	1.26507	2.17955	0.929984	1.29146	2.79157	0.904065	1.38825	2.62331	1.0354	0.998576	3.43424	1.05533	0.966122	1.25998	0.873771	1.03504	1.20742	0.655082	1.41213	1.30587	1.0647	0.76891	1.35879	1.11199	1.41453	1.15833	0.893162	1.11273	1.3688	2.48079	1.10298	0.932949	3.11625	1.0432	1.02129
Cell_0114	AMPKARt2	MK-2206 1000 nM	0.575909	0.587885	0.674627	0.463934	0.468296	0.521365	0.342191	0.678207	0.535553	0.62831	0.607428	0.292614	0.427711	0.671669	0.722379	0.619489	0.64788	0.440727	0.685942	0.674297	0.623305	0.55889	0.545026	0.680964	0.532926	0.649667	0.548628	0.668664	0.681093	0.660138	0.596549	0.478744	0.684259	0.178173	0.436149	0.567116	0.510075	0.563355	0.357511	0.729051	0.545889	0.548543	0.700595	0.66666	0.695058	0.759415	0.308012
Cell_0115	TFEB_TR	MK-2206 1000 nM	1.2417	1.09931	5.1404	0.760214	1.2169	2.16439	0.746777	0.653288	1.60442	0.793626	1.95571	0.646585	2.01379	0.572112	0.914346	1.76734	1.42111	1.31091	1.13526	1.34721	0.55974	1.1522	1.2877	1.51816	1.32736	1.75769	1.27832	1.31944	2.05495	0.486784	2.86104	1.15545	1.13127	1.24975	2.91264	1.23865	3.26712	0.395588	1.26623	1.80417	2.79672	1.28839	1.41255	2.23561	1.63445	0.442924	0.545858
Cell_0115	FOXO_TR	MK-2206 1000 nM	1.15253	0.731877	1.29303	0.73765	0.855442	0.897437	0.868655	0.956176	1.12331	1.11535	1.21415	0.854311	1.25923	2.3353	0.957452	1.36969	2.75774	0.902803	1.33007	2.71193	1.0896	0.983207	3.31288	1.10121	0.974588	1.07713	0.909853	1.01753	1.16586	0.658098	1.34322	1.35216	1.03182	0.75895	1.42384	1.17338	1.47023	1.10464	0.876148	1.04864	1.44473	2.64922	1.09974	0.948696	2.99912	1.02825	0.963182
Cell_0115	AMPKARt2	MK-2206 1000 nM	0.57802	0.573677	0.680815	0.473288	0.468092	0.53527	0.373228	0.633168	0.543695	0.624296	0.696903	0.343726	0.454796	0.656321	0.716757	0.639988	0.640655	0.409661	0.685775	0.670273	0.625663	0.554594	0.54149	0.703185	0.513582	0.522076	0.568116	0.666922	0.657019	0.669246	0.599089	0.480487	0.692143	0.18604	0.432053	0.568044	0.505816	0.606157	0.293085	0.749714	0.560987	0.493844	0.698865	0.659612	0.649653	0.738142	0.315276
Cell_0116	TFEB_TR	MK-2206 1000 nM	1.42506	1.07235	5.41211	0.787898	1.21874	2.21591	1.06404	0.673692	1.53723	0.695372	2.21425	0.66247	2.0685	0.58585	0.9854	1.52809	1.82169	1.22498	2.09366	1.37926	0.77365	1.45697	1.21862	1.62554	1.36707	1.7554	1.30384	1.16726	2.40225	0.534206	3.17749	1.1875	1.06678	1.30442	3.93196	1.39142	2.71482	0.559442	1.23032	5.36066	2.79614	1.22439	1.5927	1.85566	1.27888	0.562764	0.579673
Cell_0116	FOXO_TR	MK-2206 1000 nM	1.10289	0.716863	1.26101	0.776233	0.847121	0.879563	0.946185	1.00466	1.12676	1.12923	0.956321	0.828925	1.27755	2.22203	0.991809	1.33059	2.87919	0.933001	1.27094	2.75778	1.04215	0.951723	3.18993	1.10315	0.960347	1.08764	0.923463	1.01869	1.18575	0.64829	1.38253	1.39221	0.971845	0.803178	1.46026	0.986516	1.43282	1.1638	0.792409	1.10103	1.42263	2.0067	1.10738	0.962778	2.68956	1.03013	0.987252
Cell_0116	AMPKARt2	MK-2206 1000 nM	0.591719	0.597149	0.668143	0.461684	0.449061	0.537978	0.427767	0.626928	0.534731	0.618752	0.685504	0.36707	0.464848	0.667718	0.727647	0.627017	0.628237	0.394607	0.672724	0.655145	0.620652	0.553592	0.548173	0.703937	0.459353	0.525415	0.53996	0.696411	0.658299	0.657412	0.603005	0.455489	0.696526	0.143348	0.4409	0.564412	0.495332	0.548703	0.341466	0.739153	0.549248	0.578247	0.708868	0.680925	0.634417	0.751795	0.28649
Cell_0117	TFEB_TR	MK-2206 1000 nM	1.07191	1.05732	4.31863	0.759201	1.21006	2.19173	1.16804	0.630916	1.56263	0.793143	1.79283	0.627332	2.11424	0.594878	0.952333	1.59494	1.80317	1.34808	1.42959	1.3496	0.510803	1.51516	1.18944	1.73465	1.36064	1.70177	1.27036	0.867054	2.07308	0.523966	2.91532	1.22069	1.08121	1.27415	4.5512	1.31038	2.69592	0.583515	1.1753	3.1205	2.85752	1.10112	1.41519	1.89119	1.20702	0.455611	0.555146
Cell_0117	FOXO_TR	MK-2206 1000 nM	1.17355	0.718095	1.21189	0.76278	0.846233	0.851926	0.933915	0.998813	1.13412	1.19338	0.805041	0.85136	1.3036	2.18708	0.950606	1.22916	2.90752	0.88479	1.33	2.88068	1.08027	0.93582	3.13804	1.06918	0.985222	1.07913	0.908467	1.0047	1.18211	0.640784	1.40048	1.38718	0.941192	0.802027	1.47699	0.992961	1.49519	1.22498	0.767296	1.10279	1.42694	1.57161	1.11217	0.957042	3.2426	1.04657	1.11106
Cell_0117	AMPKARt2	MK-2206 1000 nM	0.578903	0.594995	0.67515	0.471553	0.467321	0.518419	0.416031	0.630748	0.556923	0.64116	0.68588	0.355293	0.469643	0.686014	0.720512	0.634214	0.64671	0.388399	0.680529	0.657399	0.649023	0.552162	0.546439	0.716112	0.470868	0.51873	0.55895	0.66597	0.663611	0.659654	0.603245	0.436306	0.690176	0.192335	0.464385	0.574601	0.512743	0.611806	0.341132	0.728301	0.534635	0.589267	0.703335	0.666004	0.647674	0.749426	0.25626
Cell_0118	TFEB_TR	MK-2206 1000 nM	1.50823	1.11672	3.80065	0.761434	1.17994	2.63709	0.697297	0.603747	1.62882	0.74898	1.50237	0.640422	1.99933	0.596269	0.871224	1.60258	1.96504	1.5276	1.80738	1.38041	0.73595	1.06735	1.134	1.57413	1.3587	1.75165	1.30206	1.57659	1.58953	0.536358	2.77672	1.08978	0.998987	1.3134	3.54241	1.31186	2.6101	0.478066	1.13027	4.40587	2.60348	1.04365	1.6822	1.63463	2.88481	0.527379	0.54236
Cell_0118	FOXO_TR	MK-2206 1000 nM	1.16101	0.731274	1.23092	0.77059	0.814773	0.871181	0.960789	0.991882	1.16217	1.24853	0.771079	0.839536	1.23013	2.29913	0.946041	1.24125	2.96341	0.962096	1.34953	2.90343	1.02828	0.958889	3.0716	1.08838	0.9671	1.11047	0.949458	1.06255	1.21205	0.678499	1.40194	1.28644	0.948788	0.840173	1.52789	0.972609	1.53299	1.249	0.752243	1.13858	1.4329	1.31305	1.08816	1.01096	3.94501	1.03709	0.976163
Cell_0118	AMPKARt2	MK-2206 1000 nM	0.57695	0.587812	0.687417	0.471617	0.432639	0.514422	0.415985	0.598217	0.540362	0.624727	0.674908	0.345377	0.433156	0.666026	0.710832	0.59755	0.642857	0.359599	0.693081	0.662703	0.636209	0.549892	0.555628	0.69326	0.460186	0.515244	0.541712	0.676355	0.633552	0.650256	0.59457	0.458665	0.707097	0.17471	0.485823	0.580701	0.499861	0.625539	0.323411	0.710921	0.528799	0.582399	0.707951	0.670601	0.637714	0.740097	0.336687
Cell_0119	TFEB_TR	MK-2206 1000 nM	1.6106	1.08825	4.40032	0.792639	1.11127	2.2364	0.696854	0.650948	1.63724	0.802679	1.30076	0.652067	1.92675	0.617887	0.933616	1.9047	2.00658	1.25328	1.33311	1.35575	0.709275	1.41292	1.13461	1.29022	1.32022	1.76887	1.27131	1.37135	1.30614	0.552971	1.51883	1.11189	1.05936	1.30256	2.90891	1.35353	5.38262	0.503189	1.09877	3.88334	2.6744	0.984424	1.67743	1.5223	1.364	0.526673	0.507861
Cell_0119	FOXO_TR	MK-2206 1000 nM	1.23127	0.711533	1.23298	0.808778	0.818958	0.856375	1.01847	0.990658	1.17208	1.28052	0.717921	0.897115	1.22129	1.75559	0.940412	1.24835	2.95244	0.920915	1.37771	2.73884	1.02107	0.938129	2.92418	1.08271	0.943097	1.13649	0.955724	1.0506	0.912709	0.685723	1.48993	1.2755	0.913705	0.858218	1.46053	0.952233	1.62832	1.22154	0.718135	1.11358	1.42633	1.17158	1.17779	0.985049	2.70342	1.0891	1.03395
Cell_0119	AMPKARt2	MK-2206 1000 nM	0.576608	0.574918	0.67711	0.470616	0.426405	0.506913	0.418316	0.604315	0.555337	0.630595	0.660761	0.360188	0.435112	0.724255	0.711004	0.633549	0.608123	0.43068	0.679738	0.641518	0.612603	0.537128	0.561916	0.704043	0.460259	0.5224	0.56415	0.672664	0.455721	0.666089	0.630325	0.455003	0.710261	0.145902	0.469047	0.563086	0.506192	0.645277	0.327677	0.734204	0.528817	0.582895	0.711829	0.675724	0.656338	0.741092	0.282648
Cell_0120	TFEB_TR	MK-2206 1000 nM	1.28385	1.08935	3.47486	0.802545	1.14045	2.5169	0.695938	0.638593	1.69807	0.735254	1.31995	0.639335	2.03907	0.618141	0.966924	1.59562	1.80574	1.57191	1.89605	1.32013	0.864347	1.25375	1.14905	1.25571	1.21793	1.75148	1.24506	1.08731	1.29841	0.58148	2.65731	1.15554	1.04804	1.31497	3.22285	1.29308	3.88385	0.619816	1.08039	2.37986	2.62543	1.09824	1.84819	1.90121	1.59254	0.482601	0.544854
Cell_0120	FOXO_TR	MK-2206 1000 nM	1.1906	0.727359	1.22737	0.814738	0.834882	0.841036	0.967457	1.02083	1.19585	1.24073	0.719919	0.908999	1.20724	1.26939	1.01293	1.2726	2.76719	0.943466	1.34575	2.65423	0.983725	0.957698	2.94684	1.06767	0.919387	1.1231	0.912007	1.01042	0.876555	0.724714	1.41236	1.28957	0.981095	0.851853	1.4782	0.948697	1.56725	1.12407	0.711452	1.12079	1.41379	1.11874	1.14508	0.972317	2.4261	1.04275	1.07065
Cell_0120	AMPKARt2	MK-2206 1000 nM	0.57573	0.607508	0.685214	0.475486	0.434887	0.501457	0.445488	0.589032	0.542973	0.641611	0.656432	0.373826	0.386446	0.705864	0.712235	0.633386	0.634123	0.408888	0.686056	0.652603	0.587598	0.510609	0.558183	0.69401	0.412651	0.52061	0.539264	0.676987	0.431104	0.679225	0.609057	0.447946	0.707186	0.161622	0.469614	0.552677	0.518805	0.620675	0.33123	0.744171	0.498581	0.600385	0.719319	0.662888	0.723212	0.740919	0.257588
Cell_0121	TFEB_TR	MK-2206 1000 nM	1.50833	1.15287	3.89064	0.79145	1.07595	2.4503	0.839582	0.607984	1.68161	0.851277	1.57166	0.650105	1.99046	0.603431	0.867794	1.59486	1.86974	1.15252	2.39788	1.29498	0.639673	1.61849	1.02277	1.87642	1.218	1.83436	1.30787	0.987041	1.29404	0.53215	2.36409	1.22932	1.0218	1.25505	3.14093	1.42428	4.56851	0.50644	1.08119	2.64778	3.051	0.969776	1.47865	1.79015	1.56678	0.440856	0.493866
Cell_0121	FOXO_TR	MK-2206 1000 nM	1.16491	0.699392	1.22449	0.811219	0.833069	0.866269	0.963319	1.00434	1.17959	1.26096	0.71777	0.947548	1.2769	1.07545	0.942804	1.30162	3.04107	0.918942	1.2749	2.64369	0.968637	0.936015	2.79659	1.03346	0.888856	1.16346	0.983026	0.968104	0.856206	0.702021	1.41351	1.32362	0.957033	0.839719	1.47705	0.978899	1.64354	1.13297	0.699824	1.13807	1.38931	1.07304	1.17515	0.976994	2.01002	1.08449	1.08586
Cell_0121	AMPKARt2	MK-2206 1000 nM	0.57002	0.603497	0.688815	0.452854	0.451761	0.503162	0.441158	0.554845	0.510339	0.627693	0.64088	0.355959	0.418711	0.732644	0.678988	0.62359	0.654252	0.458088	0.671279	0.637243	0.617989	0.500905	0.565496	0.711706	0.407858	0.50736	0.563688	0.655268	0.413993	0.642524	0.588432	0.43246	0.691521	0.141619	0.489288	0.557227	0.496292	0.625916	0.30459	0.729993	0.536613	0.576517	0.712458	0.676194	0.701222	0.741396	0.260173
Cell_0122	TFEB_TR	MK-2206 1000 nM	0.427076	1.18198	4.07063	0.825853	1.00525	2.33964	0.807684	0.582499	1.76881	0.827124	1.5899	0.681893	1.87802	0.627784	0.842914	1.92393	1.91712	1.52646	1.24483	1.37057	0.809296	1.76158	1.05043	1.43049	1.2333	1.75681	1.32548	1.01097	1.28815	0.534059	3.3012	1.14262	1.0609	1.26506	2.89083	1.43892	3.75831	0.393065	1.07672	3.57998	2.90751	1.06471	1.8147	1.3317	1.50557	0.453619	0.513832
Cell_0122	FOXO_TR	MK-2206 1000 nM	2.10216	0.694015	1.23421	0.858343	0.840557	0.898592	1.0257	0.937909	1.27221	1.24897	0.713185	1.01261	1.2995	0.980034	0.975562	1.30901	3.02335	1.00677	1.28794	2.88716	1.02997	0.9799	2.76169	1.06055	0.894286	1.1939	0.997812	0.970533	0.802772	0.740885	1.3195	1.24164	0.979356	0.86606	1.45084	0.939585	1.66423	1.14186	0.69838	1.13696	1.40506	1.08807	1.188	0.96772	1.73701	1.09746	1.09174
Cell_0122	AMPKARt2	MK-2206 1000 nM	0.639724	0.584523	0.674289	0.461355	0.441345	0.514316	0.450005	0.581088	0.542643	0.631833	0.655506	0.391614	0.417314	0.719795	0.720414	0.620737	0.639739	0.43494	0.646158	0.630009	0.616226	0.523021	0.554054	0.68776	0.398478	0.503886	0.550253	0.685966	0.41494	0.644536	0.577042	0.493762	0.697139	0.149551	0.480412	0.554542	0.482107	0.631157	0.30349	0.724664	0.532609	0.581872	0.705302	0.678116	0.690464	0.735762	0.204105
Cell_0123	TFEB_TR	MK-2206 1000 nM	0.438017	1.20437	3.45787	0.788707	0.935441	2.44595	0.849227	0.58863	1.71386	0.759249	2.07961	0.654431	2.05525	0.535236	0.98919	1.88278	1.69374	1.39535	1.4465	1.52799	0.703747	1.79277	1.11047	1.72994	1.24386	1.76257	1.34677	1.0711	1.34483	0.535015	2.88219	1.37177	1.01231	1.3234	3.33775	1.46689	3.55089	0.398183	1.09319	3.96626	2.76403	1.06399	1.63575		1.45651	0.537279	0.484432
Cell_0123	FOXO_TR	MK-2206 1000 nM	2.13245	0.656486	1.24794	0.816696	0.834489	0.890742	0.964137	0.869932	1.2091	1.31573	0.701706	0.929809	1.34846	0.872616	1.05171	1.32286	2.13006	0.91264	1.29914	3.00815	1.03358	0.999246	2.85635	1.06058	0.891365	1.14933	1.00339	0.965343	0.815038	0.735084	1.29607	1.08888	1.00251	0.843897	1.43152	0.984118	1.63261	1.14926	0.700197	1.24801	1.42081	1.06357	1.1767		1.61287	1.05732	1.13251
Cell_0123	AMPKARt2	MK-2206 1000 nM	0.622585	0.583764	0.68741	0.475451	0.436342	0.503825	0.427599	0.552604	0.526771	0.613638	0.6475	0.359974	0.410262	0.701101	0.729843	0.609351	0.666754	0.442326	0.657308	0.62982	0.621769	0.557143	0.585112	0.685785	0.393942	0.496134	0.549458	0.687068	0.41242	0.625764	0.575813	0.487191	0.705372	0.129287	0.473357	0.572479	0.493357	0.621539	0.295279	0.723599	0.528605	0.545076	0.707271		0.688091	0.742281	0.240381
Cell_0124	TFEB_TR	MK-2206 1000 nM	0.419709	1.26906	3.52397	0.778025	0.937429	2.66421	0.759119	0.598712	1.71329	0.879119	1.29082	0.667392	2.13507	0.635686	0.93094	1.83167	1.48328	1.45413	1.58943	1.53239	0.598676	0.957612	0.99522	1.08685	1.18923	1.77174	1.40376	0.840609	1.40053	0.568304	2.77077	1.39956	1.06065	1.32266	3.28945	1.42268	3.75624	0.53342	1.10538	2.99257	2.49651	1.07829	1.60514		1.25044	0.466528	0.506063
Cell_0124	FOXO_TR	MK-2206 1000 nM	1.87507	0.689861	1.21507	0.813785	0.837039	0.920045	1.01198	0.876409	1.22877	1.28898	0.719062	1.00012	1.30952	1.00908	0.989916	1.24222	1.55244	0.947653	1.3035	2.83249	1.02941	0.99745	2.74428	1.02317	0.930582	1.17157	1.04412	0.92963	0.77829	0.74744	1.32111	1.12225	1.04766	0.862597	1.40029	0.981188	1.71294	1.18045	0.708535	1.24387	1.40883	1.2398	1.21383		1.50255	1.06587	1.11365
Cell_0124	AMPKARt2	MK-2206 1000 nM	0.60041	0.59073	0.681875	0.499799	0.436836	0.501633	0.437071	0.549481	0.511097	0.621055	0.665283	0.345179	0.425489	0.729587	0.716039	0.628881	0.657885	0.437372	0.656843	0.646696	0.623916	0.563202	0.605693	0.6833	0.427383	0.500904	0.525536	0.677886	0.422217	0.642664	0.582278	0.503894	0.719357	0.145696	0.446275	0.554287	0.516793	0.652708	0.295611	0.727354	0.49137	0.555344	0.712779		0.685043	0.757085	0.231497
Cell_0125	TFEB_TR	MK-2206 1000 nM	0.405935	1.10161	3.89635	0.732692	0.930057	2.89108	0.645275	0.563694	1.63253	0.90961	1.21405	0.689619	2.11576	0.614322	0.914661	1.89375	1.33305	1.44487	1.7414	1.52821	0.676277	1.32398	1.00732	1.45183	1.20645	1.81573	1.32502	0.814379	1.42667	0.539569	2.79131	1.19856	1.01495	1.314	4.46891	1.36982	3.53124	0.358746	1.10401	3.13684	2.63517	1.17995	1.81759		1.19012	0.405672	0.532511
Cell_0125	FOXO_TR	MK-2206 1000 nM	1.79082	0.70051	1.21506	0.774702	0.86312	0.897645	0.994099	0.856874	1.18234	1.33605	0.756985	1.12807	1.34991	0.950117	1.03806	1.25667	1.38047	0.885718	1.28158	2.79112	0.976069	0.965433	2.90542	1.06936	0.943987	1.19195	1.03584	0.937555	0.786273	0.752402	1.31114	1.13228	1.05144	0.844188	1.43237	0.953944	1.71464	1.05603	0.727869	1.26495	1.35884	1.78997	1.18137		1.40298	1.08315	1.19109
Cell_0125	AMPKARt2	MK-2206 1000 nM	0.595937	0.606509	0.692517	0.485681	0.44015	0.48388	0.425399	0.548195	0.531292	0.589733	0.661246	0.323808	0.40601	0.705654	0.713718	0.641706	0.682864	0.440997	0.67422	0.655891	0.610928	0.578585	0.608803	0.693359	0.4573	0.498053	0.562558	0.668485	0.416584	0.646621	0.559775	0.478455	0.70995	0.148743	0.469743	0.56113	0.528955	0.65153	0.301643	0.743741	0.547852	0.566777	0.710662		0.68266	0.740308	0.199314
Cell_0126	TFEB_TR	MK-2206 1000 nM	0.437701	1.02795	3.90857	2.37456	0.883842	3.09344	0.933521	0.608004	1.67521	0.885425	1.26587	0.680895	2.17378	0.655272	0.972171	1.85132	1.22868	1.20665	1.23044	1.611	0.598692	1.49937	0.866515	1.79201	1.16926	1.84972	1.41421	0.839317	1.51082	0.574555	3.44105	1.51138	1.04495	1.2125	3.87493	1.38833	3.63768	0.430126	1.11957	2.37157	2.56605	1.0635	1.61909		1.22461	0.534934	0.576778
Cell_0126	FOXO_TR	MK-2206 1000 nM	1.64464	0.724159	1.16144	1.34915	0.867442	0.893827	1.01383	0.932248	1.16905	1.3243	0.697439	1.04467	1.38405	1.0671	1.0478	1.27257	1.2408	0.869319	1.25652	2.61548	0.977341	1.0158	2.81528	1.06841	0.94125	1.2051	1.08461	0.965396	0.82441	0.795919	1.33455	1.16685	1.05126	0.850406	1.43295	0.959622	1.73892	1.09425	0.766947	1.27756	1.40844	1.82841	1.18191		1.29087	1.05405	1.30493
Cell_0126	AMPKARt2	MK-2206 1000 nM	0.612218	0.617478	0.689249	0.511062	0.453694	0.499616	0.384839	0.573224	0.480746	0.615437	0.660423	0.29613	0.418749	0.730893	0.71306	0.596854	0.665063	0.442519	0.663227	0.65704	0.637035	0.522989	0.588355	0.696911	0.480593	0.49487	0.558787	0.678947	0.426771	0.651693	0.567027	0.475849	0.704959	0.147892	0.422706	0.564496	0.515123	0.659864	0.299584	0.737008	0.498317	0.574138	0.697214		0.707229	0.750741	0.243294
Cell_0127	TFEB_TR	MK-2206 1000 nM	0.42359	0.957374	3.12408	1.81287	0.820175	3.02433	0.777706	0.593825	1.70699	0.914822	0.870201	0.718909	2.15273	0.641962	0.964465	1.79094	1.14483	1.40416	1.30254	1.53012	0.72705	1.51335	0.852725	1.79883	1.10639	1.73044	1.36358	1.23328	1.50132	0.564705	2.67719	1.50979	0.945413	1.17845	1.49222	1.44234	3.48231	0.488934	1.11822	3.77527	2.43927	1.00681	1.76926		1.27693	0.51641	0.519388
Cell_0127	FOXO_TR	MK-2206 1000 nM	1.64915	0.704445	1.17058	1.36959	0.84919	0.932757	1.05827	0.774259	1.18417	1.37766	0.724485	0.953029	1.30387	1.03256	1.07576	1.32499	1.16272	0.858682	1.2438	1.84375	0.927722	1.02634	2.80571	1.11322	0.924319	1.221	1.04166	1.01398	0.804811	0.796356	1.2906	1.18054	1.09962	0.844121	1.8158	1.01698	1.75194	1.08521	0.801155	1.22823	1.35756	1.83707	1.20071		1.27172	1.04845	1.18241
Cell_0127	AMPKARt2	MK-2206 1000 nM	0.610223	0.61363	0.691858	0.493009	0.432993	0.48435	0.368749	0.55318	0.537301	0.598224	0.681401	0.3843	0.408774	0.73373	0.734024	0.5926	0.673929	0.446072	0.661859	0.704435	0.621916	0.548675	0.613763	0.678361	0.443787	0.485556	0.547921	0.659763	0.421776	0.673032	0.584952	0.467757	0.709434	0.12072	0.570676	0.554879	0.512184	0.638427	0.296057	0.74602	0.511524	0.59796	0.703484		0.70243	0.74937	0.229168
Cell_0128	TFEB_TR	MK-2206 1000 nM	0.444062	0.882736	4.12657	1.5696	0.818945	2.88272	0.82573	0.622998	1.6075	1.1677	0.844295	0.695155	1.77424	0.601902	0.961096	2.01339	1.08665	1.01581	1.27012	1.49674	0.731706	1.52635	0.900681	1.28778	1.17265	1.66509	1.32637	0.635772	1.47276	0.619341	2.88311	1.50819	1.01343	1.17378	1.38832	1.31507	3.61514	0.482559	1.07485	3.23874	2.51836	0.99057	1.73546		1.02219	0.572878	0.558629
Cell_0128	FOXO_TR	MK-2206 1000 nM	1.5452	0.691956	1.15436	1.36706	0.839654	0.944799	1.05951	0.792238	1.14324	1.35683	0.687206	1.01257	1.32206	0.96417	1.06995	1.36234	1.0949	0.879449	1.30976	1.46489	0.930051	1.02799	2.87713	1.11755	0.987751	1.17295	1.01282	0.966563	0.80483	0.836633	1.25778	1.19424	1.13837	0.870336	1.86223	0.9722	1.69512	1.15681	0.759931	1.24642	1.41032	1.20192	1.26035		1.27294	1.02048	1.25348
Cell_0128	AMPKARt2	MK-2206 1000 nM	0.616174	0.618165	0.690631	0.514857	0.453426	0.503538	0.412249	0.541414	0.51697	0.592933	0.670269	0.328174	0.40625	0.741859	0.710818	0.631045	0.671993	0.485163	0.646381	0.698975	0.634318	0.535857	0.610625	0.694317	0.445529	0.527797	0.549134	0.678793	0.411173	0.654146	0.601553	0.459665	0.721932	0.097155	0.580437	0.576283	0.503916	0.628155	0.307614	0.746771	0.493445	0.563169	0.707362		0.687989	0.750772	0.227153
Cell_0129	TFEB_TR	MK-2206 1000 nM	0.416476	0.844319	3.79907	3.45546	0.894475	2.9671	0.620167	0.616228	1.63236	1.02915	1.15494	0.64902	2.30652	0.627969	1.05668	1.90652	1.02573	1.40531	0.987205	1.47913	0.623124	1.22066	0.951957	2.12791	1.18704	1.57837	1.33468	0.892729	1.4227	0.618615	2.58486	1.62093	1.13256	1.1735	1.7344	1.31099	3.25038	0.653705	1.09498	1.89655	2.62822	0.848545	1.77231		1.06752	0.503185	0.555772
Cell_0129	FOXO_TR	MK-2206 1000 nM	1.35929	0.736457	1.17599	1.37743	0.861522	0.957718	1.00187	0.914974	1.20518	1.30573	0.711397	1.03886	1.32593	1.00346	1.03387	1.40464	1.04901	0.923484	1.22591	1.27798	0.971083	1.01475	2.90931	1.09852	0.977875	1.2142	1.05372	1.05621	0.783492	0.853319	1.18112	1.21436	1.12546	0.849633	1.89721	0.986278	1.6271	1.09226	0.767392	1.25632	1.43421	1.0674	1.23108		1.26227	1.03534	1.25589
Cell_0129	AMPKARt2	MK-2206 1000 nM	0.590378	0.617911	0.689814	0.518477	0.398227	0.509374	0.396019	0.580214	0.499631	0.602438	0.655547	0.281936	0.419115	0.74362	0.713989	0.618863	0.669066	0.411758	0.648647	0.700461	0.62586	0.529234	0.614628	0.691752	0.425198	0.517682	0.548035	0.680362	0.408115	0.655508	0.572648	0.470078	0.721192	0.0535317	0.565717	0.568744	0.51965	0.630217	0.320188	0.766419	0.501773	0.579749	0.703848		0.697895	0.750036	0.331758
Cell_0130	TFEB_TR	MK-2206 1000 nM	0.436866	0.876551	3.4403	1.6493	0.870587	3.15004	1.27368	0.628142	1.68357	1.09354	1.2916	0.64734	2.30501	0.635919	1.00457	2.20386	1.1421	1.20564	1.81682	1.46178	0.596582	1.34215	1.12039	1.49247	1.15902	1.50449	1.42202	1.10517	1.4415	0.701194	2.77886	1.75359	1.02188	1.13883	1.63581	1.3391	4.06674	0.437409	1.10534	1.74376		0.941746	1.5841		1.13969	0.612935	0.554423
Cell_0130	FOXO_TR	MK-2206 1000 nM	1.51292	0.759441	1.15671	1.36801	0.873047	0.958444	1.0804	0.90679	1.17399	1.25423	0.726001	0.974624	1.30864	0.998608	1.0657	1.42235	1.06285	0.864594	1.25027	1.19833	0.973235	1.00962	2.97328	1.09725	0.931472	1.26006	1.09196	1.09581	0.763588	0.953214	1.25021	1.18229	1.073	0.844878	1.79475	1.04232	1.69717	1.10789	0.789822	1.2552		1.07337	1.20837		1.27781	1.03831	1.22321
Cell_0130	AMPKARt2	MK-2206 1000 nM	0.593119	0.593796	0.685018	0.485559	0.430755	0.515665	0.533326	0.587142	0.475746	0.590688	0.669418	0.300865	0.3625	0.743138	0.715291	0.605265	0.675198	0.42496	0.647889	0.711759	0.619331	0.504793	0.603164	0.681106	0.409064	0.517468	0.559776	0.679503	0.409949	0.66152	0.562766	0.412025	0.71957	0.0813159	0.547505	0.563814	0.539247	0.636607	0.345552	0.766537		0.625765	0.714156		0.686402	0.752274	0.383267
Cell_0131	TFEB_TR	MK-2206 1000 nM	0.437645	0.821216	3.24891	2.06969	0.873512	2.89043	1.25528	0.595187	1.77992	1.08488	1.1563	0.661076	2.059	0.569519	0.984459	2.36804	1.15676	1.19806	1.36651	1.37409	0.690024	0.923379	1.2085	0.967011	1.20891	1.43185	1.34757	1.0582	1.54432	0.706988	1.72558	1.92465	1.13162	1.17589	1.5432	1.32324	4.64499	1.15066	1.09126	3.04959		0.951843	1.76966		1.1829	0.429645	0.490131
Cell_0131	FOXO_TR	MK-2206 1000 nM	1.60256	0.764082	1.15576	1.39133	0.878208	0.975336	1.05714	0.831661	1.24873	1.2963	0.704292	0.968467	1.32199	0.882914	1.02775	1.46192	1.07145	0.85882	1.27885	1.07971	0.921768	0.999018	2.51535	1.03413	0.967543	1.31119	1.06664	1.05817	0.830051	0.960528	1.2601	1.20476	1.10897	0.847985	1.75798	1.0113	1.66176	3.7993	0.775773	1.27825		1.05203	1.20715		1.25201	1.04256	1.15552
Cell_0131	AMPKARt2	MK-2206 1000 nM	0.575457	0.61406	0.690045	0.482991	0.446236	0.528332	0.525467	0.579115	0.493484	0.6076	0.656793	0.236337	0.390437	0.694806	0.707312	0.586821	0.655515	0.413691	0.655984	0.688033	0.626792	0.506448	0.660788	0.681557	0.429708	0.516204	0.545986	0.666803	0.433745	0.657984	0.611065	0.448411	0.726497	0.0869965	0.552981	0.576796	0.527243	0.595232	0.346969	0.749757		0.634868	0.708084		0.715636	0.734089	0.389391
Cell_0132	TFEB_TR	MK-2206 1000 nM	0.446992	0.768822	3.70599	3.65868	0.886164	3.16677	1.26105	0.62061	1.82264	0.99873	0.76832	0.649893	2.42934	0.627887	0.941491	2.05765	1.08507	1.28749	1.46744	1.35938	0.771932	1.29621	1.14911	1.81251	1.21933	1.32327	1.44995	1.22262	1.59109	0.749506	1.62126	1.99629	1.07993	1.12948	1.61199	1.28873	4.15948	0.751848	1.09109	2.38965		1.0014	1.73835		1.12458	0.35953	0.474884
Cell_0132	FOXO_TR	MK-2206 1000 nM	1.58978	0.785202	1.15511	1.4069	0.864258	0.932233	1.05004	0.887412	1.25046	1.3165	0.722825	0.931253	1.3729	0.914179	1.06554	1.47486	1.02522	0.84986	1.25241	1.00572	1.00276	0.971886	2.03826	1.09952	0.946625	1.38473	1.1178	1.09192	0.828066	1.01328	1.22399	1.18898	1.11411	0.865053	1.7198	1.03857	1.65957	3.87302	0.758638	1.2845		1.07791	1.16718		1.24948	1.0359	1.15076
Cell_0132	AMPKARt2	MK-2206 1000 nM	0.628874	0.64735	0.662422	0.496133	0.421319	0.50744	0.525737	0.563666	0.452145	0.613597	0.655938	0.231635	0.452675	0.724946	0.723449	0.577459	0.668174	0.43806	0.650163	0.679806	0.635119	0.567039	0.670788	0.682995	0.392842	0.523697	0.552907	0.686075	0.443084	0.641674	0.643956	0.472626	0.724804	0.0720831	0.545118	0.592457	0.540783	0.610182	0.340254	0.768481		0.600297	0.707507		0.68468	0.733282	0.391559
Cell_0133	TFEB_TR	MK-2206 1000 nM	0.439569	0.780086	2.97991	1.80987	0.952814	2.8205	1.2691	0.64493	1.73786	0.949084	1.01955	0.619301	1.86649	0.656317	1.03362	2.16958	1.05897	1.24137	1.11333	1.37297	0.870911	0.962532	1.02853	1.38719	1.20721	1.42904	1.44504	1.37495	1.61497	0.81839	2.37932	2.01859	1.10642	1.11702	1.91755	1.24318	4.5733	0.959736	1.15827	3.22059		1.13553	1.6905		1.12081	0.517575	0.516612
Cell_0133	FOXO_TR	MK-2206 1000 nM	1.52352	0.761684	1.13923	1.4157	0.896878	0.964461	1.0552	0.836794	1.26742	1.25965	0.742557	0.925164	1.34732	0.940251	1.04264	1.46212	1.00938	0.818797	1.2406	0.954319	0.946634	0.968214	1.71991	1.07015	0.954015	1.39325	1.12541	1.09273	0.852024	1.00807	1.16003	1.24804	1.12365	0.847577	1.68013	1.01742	1.69004	3.5093	0.796524	1.24168		1.11223	1.23037		1.25487	1.04657	1.30641
Cell_0133	AMPKARt2	MK-2206 1000 nM	0.617193	0.629446	0.681624	0.502444	0.381903	0.521573	0.537175	0.59336	0.494678	0.616476	0.662519	0.221571	0.411884	0.712857	0.729557	0.566418	0.686451	0.436277	0.652927	0.673635	0.625938	0.592668	0.656782	0.679031	0.419619	0.514459	0.54673	0.679072	0.448306	0.641935	0.591011	0.462491	0.734167	0.0890844	0.545406	0.564713	0.544511	0.618965	0.355028	0.747575		0.583412	0.721792		0.719374	0.738171	0.344468
Cell_0134	TFEB_TR	MK-2206 1000 nM	0.436139	0.834159	2.91696	1.61789	0.932478	3.10649	1.30323	0.672379	1.77496	0.615892	0.852531	0.615304	1.89037	0.653508	1.15421	2.60362	1.07852	1.38285	1.53544	1.37095	0.64979	1.42137	0.870219	1.68691	1.23774	1.53921	1.44003	1.19458	1.655	0.870069	1.77677	2.3285	1.23777	1.27017	1.74365	1.17302	5.05053	0.982191	1.15692	4.13484		1.23141	1.89724		1.21075	0.537036	0.507265
Cell_0134	FOXO_TR	MK-2206 1000 nM	1.50826	0.734588	1.09031	1.49451	0.87472	0.952605	1.08259	0.914691	1.26507	1.38868	0.730962	0.938	1.4425	0.949739	1.03513	1.53638	1.00488	0.834563	1.24265	0.918366	0.993606	1.00837	1.50257	1.10005	0.935216	1.37737	1.11675	1.14591	0.857564	1.00775	1.29355	1.2437	1.15797	0.886928	1.62221	0.988224	1.78444	3.8794	0.783278	1.27963		1.1499	1.25023		1.2742	1.04149	1.35194
Cell_0134	AMPKARt2	MK-2206 1000 nM	0.637391	0.63936	0.676272	0.490501	0.384137	0.515795	0.527658	0.589933	0.529918	0.528953	0.672414	0.204101	0.390472	0.733402	0.712692	0.574822	0.685901	0.381227	0.660374	0.666161	0.628802	0.533076	0.637421	0.679528	0.407579	0.50151	0.56649	0.697534	0.441067	0.620553	0.604997	0.486194	0.728253	0.0911508	0.551915	0.583777	0.555287	0.624632	0.358862	0.74967		0.595368	0.699453		0.694398	0.750948	0.341065
Cell_0135	TFEB_TR	MK-2206 1000 nM	0.43166	0.775332	3.26491	1.21229	0.933916	2.99675	1.34941	0.653175	1.73398	0.608267	0.536344	0.622298	1.70486	0.597957	1.00259	2.52745	1.08878	1.42215	0.995029	1.3439	0.724475	1.50553	0.873751	1.28131	1.26863	1.47754	1.49537	0.97477	1.50712	0.926577	2.29482	2.22959	1.18936	1.2586	1.77903	1.21022	5.56543	1.14071	1.15213	3.46814	1.40902	1.33911	1.86565		1.19201	0.475336	0.505179
Cell_0135	FOXO_TR	MK-2206 1000 nM	1.61014	0.688707	1.11012	1.36474	0.894289	0.980031	1.11642	0.930737	1.2741	1.33188	0.722453	0.909078	1.33538	0.927169	1.12728	1.47215	0.985551	0.837458	1.28252	0.877043	0.968914	1.00117	1.40801	1.1031	0.951427	1.35323	1.1606	1.08485	0.802615	1.0114	1.26411	1.24538	1.12369	0.844178	1.59189	1.03847	1.77248	4.38187	0.764918	1.23663	3.06163	1.20318	1.21417		1.24145	1.04944	1.23811
Cell_0135	AMPKARt2	MK-2206 1000 nM	0.640059	0.614487	0.678048	0.51604	0.406487	0.512598	0.515488	0.573566	0.510955	0.520295	0.666945	0.192659	0.404068	0.734874	0.714178	0.600094	0.674534	0.382075	0.653461	0.660724	0.61914	0.529242	0.644942	0.686909	0.396913	0.545794	0.556152	0.699056	0.446432	0.612521	0.605482	0.49622	0.710983	0.105332	0.567052	0.593218	0.541034	0.652109	0.34789	0.750286	0.6333	0.631911	0.701362		0.706407	0.753292	0.323077
Cell_0136	TFEB_TR	MK-2206 1000 nM	0.410758	0.750574	2.2788	2.02608	0.995112	3.08351	1.39727	0.656836	1.83178	0.621662	0.886383	0.620632	2.20837	0.633494	1.01951	2.40817	1.03179	1.24243	1.18092	1.26515	0.720403	0.908425	0.873795	1.16127	1.29996	1.36946	1.55439	0.895253	1.52583	0.958485	2.18413	2.25616	1.31605	1.25649	1.69727	1.2133	4.47487	1.23562	1.12608	3.82343	1.69432	1.23758	1.81339		1.18957	0.400457	0.517928
Cell_0136	FOXO_TR	MK-2206 1000 nM	1.54245	0.706456	1.0979	1.34017	0.917592	0.961204	1.19767	0.885075	1.31133	1.38036	0.668228	0.865141	1.40318	0.943877	1.09392	1.435	1.04421	0.869784	1.29961	0.817461	0.951651	0.98292	1.34702	1.10322	0.973795	1.30343	1.18105	1.12085	0.850549	1.01309	1.32781	1.24301	1.0893	0.8625	1.55996	1.0648	1.68935	4.1354	0.742415	1.27096	2.92304	1.17661	1.28841		1.26024	1.03641	1.31926
Cell_0136	AMPKARt2	MK-2206 1000 nM	0.670688	0.635131	0.675327	0.495704	0.448698	0.49385	0.532827	0.563066	0.522431	0.535969	0.668454	0.306731	0.426107	0.709569	0.718911	0.554929	0.682603	0.340231	0.630196	0.659346	0.60906	0.533321	0.630833	0.695888	0.413139	0.553627	0.566804	0.696976	0.456263	0.644545	0.591071	0.504723	0.719745	0.101528	0.574338	0.577936	0.54441	0.628032	0.349752	0.742293	0.642567	0.589882	0.687737		0.70042	0.737546	0.361895
Cell_0137	TFEB_TR	MK-2206 1000 nM	0.417656	0.801337	2.82097	1.52928	1.04485	2.89418	1.39089	0.676105	1.86438	0.614826	0.785715	0.654246	2.0345	0.64344	1.03852	2.19496	1.01216	1.35025	1.44591	1.26652	0.811033	1.1074	0.918901	1.41053	1.36047	1.26138	1.54442	0.966876	1.75448	1.04193	1.9933	2.71436	1.2701	1.25362	1.70384	1.21009	4.31411	1.25265	1.11807	2.88468	0.906102	1.26803	1.77874		1.29591	0.486329	0.478241
Cell_0137	FOXO_TR	MK-2206 1000 nM	1.52737	0.733675	1.1289	1.37858	0.965352	0.955301	1.27744	0.987207	1.29572	1.34718	0.692215	0.872814	1.42363	0.937158	1.13308	1.40447	1.01387	0.857212	1.29401	0.844977	0.975527	0.996082	1.2933	1.07592	1.01279	1.25363	1.15858	1.11553	0.948303	1.09183	1.29267	1.29668	1.10804	0.847103	1.46726	1.08264	1.72536	4.28134	0.737999	1.26192	3.14465	1.19835	1.27128		1.26579	1.0033	1.26572
Cell_0137	AMPKARt2	MK-2206 1000 nM	0.680082	0.630404	0.66343	0.534754	0.430817	0.48942	0.518784	0.567134	0.532635	0.519492	0.646081	0.26804	0.433012	0.741599	0.709835	0.531406	0.655106	0.418771	0.644071	0.644941	0.62505	0.511119	0.627895	0.691351	0.429042	0.56146	0.561048	0.699812	0.45858	0.640821	0.607145	0.508804	0.727882	0.0853239	0.621319	0.590675	0.539456	0.648471	0.348413	0.745322	0.6384	0.596179	0.700948		0.718205	0.739261	0.344555
Cell_0138	TFEB_TR	MK-2206 1000 nM	0.402386	0.787634	3.2397	1.8548	1.03219	3.39196	1.44911	0.690051	1.8507	0.616232	0.855818	0.682671	1.70753	0.663751	1.21579	2.52133	1.08878	1.67206	1.13727	1.34564	0.830175	1.46814	0.942144	1.45281	1.35237	1.3463	1.54983	1.01228	1.89673	1.35071	2.23602	2.62397	1.29315	1.27456	1.67542	1.19503	3.99915	1.10321	1.12179	2.85327	2.19285	1.3106	2.10446		1.37561	0.553195	0.515187
Cell_0138	FOXO_TR	MK-2206 1000 nM	1.48135	0.74844	1.15103	1.32274	0.971682	0.97105	1.36486	0.99563	1.25494	1.3091	0.684388	0.881052	1.97696	0.917196	1.08355	1.45918	0.978689	0.881595	1.28781	0.873083	0.981168	0.996886	1.32948	1.1132	1.02491	1.2251	1.15921	1.11193	0.939701	1.2088	1.28295	1.31377	1.10104	0.845845	1.45851	1.07444	1.72117	4.25605	0.739119	1.26806	3.3523	1.09645	1.27745		1.2715	0.995512	1.43118
Cell_0138	AMPKARt2	MK-2206 1000 nM	0.688813	0.637899	0.665725	0.527883	0.415732	0.499847	0.505381	0.567899	0.562229	0.540936	0.655553	0.292975	0.417724	0.708772	0.689472	0.539131	0.673173	0.402921	0.634552	0.661092	0.631993	0.557218	0.643321	0.693439	0.483123	0.547408	0.564157	0.668139	0.422195	0.640289	0.580067	0.5173	0.740327	0.0791743	0.602313	0.587568	0.566522	0.647099	0.327431	0.761424	0.61003	0.609176	0.692633		0.699159	0.725743	0.308249
Cell_0139	TFEB_TR	MK-2206 1000 nM	0.425898	0.821146	3.12007	1.87332	0.977839	3.00952	1.53824	0.763551	1.87159	0.618784	0.92044	0.698592	1.61866	0.598576	1.15441	2.18363	1.01087	1.38443	1.52522	1.18193	0.721858	1.23424	0.862086	1.66281	1.21044	1.38432	1.55831	0.793487	1.68366	1.2553	1.55667	2.43299	1.32062	1.32879	1.72086	1.19886	5.99481	1.14304	1.15197	3.94037	2.68908	1.42786	2.13893	1.02737	1.43025	0.627917	0.483269
Cell_0139	FOXO_TR	MK-2206 1000 nM	1.66112	0.719993	1.1072	1.43691	0.973475	0.989574	1.54441	1.02868	1.27055	1.28686	0.677404	0.896736	1.96548	0.921341	1.10092	1.38591	0.990464	0.8737	1.25299	0.850206	0.936736	1.0587	1.29426	1.12229	0.975726	1.10536	1.15863	1.11507	0.828248	1.24406	1.3759	1.31996	1.10044	0.891741	1.37943	1.0704	1.73962	4.04138	0.770214	1.28996	3.27762	1.12792	1.31286	1.93135	1.27261	1.06599	1.32934
Cell_0139	AMPKARt2	MK-2206 1000 nM	0.694016	0.646934	0.669536	0.523108	0.432944	0.484361	0.502669	0.553508	0.546915	0.526589	0.672321	0.273627	0.495001	0.739936	0.72897	0.580358	0.658726	0.377441	0.637488	0.69153	0.586489	0.552349	0.628574	0.703607	0.475301	0.536534	0.555783	0.68322	0.482373	0.64557	0.62212	0.525724	0.734699	0.104015	0.596003	0.585914	0.569288	0.631463	0.31166	0.741354	0.614839	0.624178	0.6773	0.503837	0.679131	0.740678	0.252407
[truncated: 63 more rows]
[truncated: 74 more columns]

## Sheet: condition 03
Treatment Spike																					Oligomycin 1.800000e+00 ug/ml
[truncated: 397 more rows]
[truncated: 74 more columns]

[truncated: 3 more sheets: condition 04, condition 05, condition 06]
