# Supplementary material for: Continuous sensing of nutrients and growth factors by the mTORC1-TFEB axis
Source: eLife. 2023 Sep 12;12:e74903. doi: 10.7554/eLife.74903 (PMC10547473; doi:10.7554/eLife.74903)
Supplement: Figure 6—source data 1. [file elife-74903-fig6-data1.xlsx]

## Sheet: Sheet1
Cyclic immunoflourescent staining; Treatments applied 1 hour prior to fixation/staining; Treatments labels preceed Stain labels (first 4); Data are cell-by-stain, with stain targets as labeled
Glucose	Glutamine	EAA	Ins	DAPI	pRb	pULK1	TFEB_CN	TFEB_N	OPP	pS6_240	pS6_235	tS6	npS6_240	npS6_235	p4EBP	t4EBP	np4EBP	pGSK3	pAKT_473	tAKT	npAKT_473	pACC	ATF4	pS6K
17	2.5	0.1	10	-0.828773	0.000143766	0.000402824	-0.0214763	0.000175111	0.000202485	0.00518741	0.00269414	-0.00270275	0.46538	0.221775	-0.000743709	-0.0152799	0.0272916	0.000207197	0.000791889	0.000350372	0.195391	0.000501125	0.000752308	0.000129165
17	2.5	0.1	10	1.65899	-0.000255851	6.58501e-05	0.0261754	-0.000393656	-0.00542861	0.00124711	0.000861182	-0.00442256	0.148553	0.0561595	-0.000965808	-0.0136847	0.00666858	-5.96432e-05	0.00026919	-0.000642812	0.176088	0.000353962	0.000411529	-0.000133599
17	2.5	0.1	10	3.30492	0.00019197	0.000220739	-0.0537902	0.000171637	-0.000691481	0.00668331	0.00553871	-0.00227509	0.575502	0.470763	-0.000833374	-0.0154232	0.0236167	0.000170367	0.00045103	0.000540442	0.0810031	0.0004474	0.000793531	0.00021231
17	2.5	0.1	10	2.89188	0.000102858	0.000117527	0.00798113	0.000502513	0.00967487	0.00319677	0.00122674	-0.00219874	0.257508	0.0807828	-0.000151597	-0.0133839	0.0433446	0.000554206	0.000914461	0.000731342	0.180556	-7.98141e-05	0.000480919	0.000282927
17	2.5	0.1	10	2.6195	0.000111635	0.000179137	0.00469941	0.000134156	-0.00379703	0.0025204	0.00113108	-0.00445552	0.293019	0.0866733	-0.00104672	-0.0160904	0.0167448	0.000224896	0.000707244	-0.00103482	0.45715	-5.60663e-05	0.000390067	-0.000552844
17	2.5	0.1	10	2.16293	-0.000604077	-7.63322e-05	0.102164	-5.23073e-05	0.00239251	0.000322494	0.000740326	-0.00481245	0.0552962	0.0438671	-0.000646612	-0.0166684	0.042873	0.000236654	0.000606453	-0.000282524	0.234681	-0.000276946	0.000387256	-0.000181837
17	2.5	0.1	10	-0.499329	6.54453e-05	0.000357078	-0.0643242	0.000102947	0.000412766	0.00132279	0.000863516	-0.00398583	0.141212	0.0544971	-0.00120178	-0.0176004	0.0184116	0.000101392	0.000724776	0.000251149	0.18968	0.000390172	0.000306845	0.000112389
17	2.5	0.1	10	2.66902	0.000126646	-3.16709e-05	-0.0711583	-0.000118188	-0.00242823	0.000882816	0.000924542	-0.00522876	0.13651	0.0680356	-0.00157597	-0.0225674	0.0380532	-0.000176216	0.000119344	-0.000585654	0.109559	-0.000168882	0.000602352	-0.000486043
17	2.5	0.1	10	2.94614	0.000208395	0.000402716	-0.00391089	0.000742325	-0.002193	0.00717977	0.00519591	-0.00219416	0.614526	0.436714	-0.000695395	-0.0126798	0.0138728	0.000550527	0.00148414	-0.000231356	0.518551	-0.000115309	0.000367533	-0.000343464
17	2.5	0.1	10	1.79629	-0.000210222	0.000198336	0.070014	0.000100337	0.00507032	0.00334713	0.00122752	-0.000773559	0.219635	0.073409	0.000714009	-0.0051312	0.0312638	0.000562078	0.000995455	0.000971763	0.173446	0.000342392	0.000941101	0.000508312
17	2.5	0.1	10	-2.78035	-0.000714247	0.000126378	0.103219	-0.000223945	-0.00156911	0.00455328	0.00204633	-0.00503467	0.570754	0.201791	-0.000998997	-0.0168771	0.0247998	3.80644e-05	6.86032e-05	-0.000551832	0.0856887	9.63118e-05	-0.000149686	2.02257e-05
17	2.5	0.1	10	-0.244574	-0.000269823	-7.33516e-05	0.0105575	-7.58553e-05	0.0102178	0.00132287	0.000857716	-0.00392124	0.139004	0.0536123	-0.00100268	-0.0191019	0.0430816	7.69462e-05	0.00061882	0.000235589	0.16122	-1.50418e-05	0.000601535	0.00016929
17	2.5	0.1	10	-0.861169	-0.000439319	-2.53e-05	-0.0844042	0.000428051	-0.00336803	0.00152184	0.000805085	-0.00660183	0.29615	0.0610805	-0.00221981	-0.0214384	-0.0227941	-4.46434e-05	0.000130441	-0.001258	0.248187	-0.000544105	0.000734174	-0.000707307
17	2.5	0.1	10	-2.23762	-0.00027336	0.000447646	-0.0490237	0.000406528	0.000870574	0.00528122	0.00268136	-0.00257078	0.466157	0.218059	-0.000543782	-0.0142884	0.0306757	0.00022377	0.000558363	0.000140967	0.155688	0.000272047	0.000330034	-9.52883e-05
17	2.5	0.1	10	0.862798	6.46734e-05	0.000244008	0.0337705	6.79418e-05	0.00871443	0.00252073	0.00107969	0.000451204	0.124072	0.0575254	-5.00318e-06	-0.010067	0.0293325	0.000298501	0.000692028	0.000189416	0.188593	0.000463827	0.000576274	-4.93438e-05
17	2.5	0.1	10	1.75751	0.00100247	0.000845341	0.16136	0.00124443	0.00161441	0.00318476	0.00175393	-0.00597897	0.481474	0.186017	-0.0013261	-0.0208012	0.0378794	2.54839e-05	4.30806e-05	-0.000502607	0.0697217	0.000105714	0.000120222	5.88868e-05
17	2.5	0.1	10	2.29669	0.000145952	0.000370056	0.0225236	0.000681268	-0.000547304	0.00689091	0.00432885	-0.00240267	0.603307	0.365506	-0.000962443	-0.0152627	0.0159039	0.000415094	0.000948549	-0.000838815	0.497586	-0.000175726	0.000241999	-0.000199672
17	2.5	0.1	10	-1.40037	-0.000365264	0.000219255	0.104039	0.000600144	0.00398669	0.00576141	0.00398653	-0.000968214	0.421021	0.297246	-0.000156248	-0.00973354	0.0214741	0.000730518	0.00100111	0.000629888	0.215123	5.31047e-05	0.000783737	0.000513423
17	2.5	0.1	10	-1.86385	-0.000305525	0.000178131	0.02147	-6.09979e-05	-0.00930546	0.00283504	0.00153193	-0.00587975	0.425807	0.154008	-0.00144242	-0.0201247	0.0232471	-1.62227e-05	0.000590076	-0.00141448	0.546879	-0.000160403	0.000856336	-0.000745903
17	2.5	0.1	10	0.592254	-0.000497617	-5.21393e-05	0.0491646	-0.000495674	0.0145597	0.00413224	0.00229543	-0.00392573	0.437422	0.206268	-0.00132153	-0.018853	0.0205969	8.79794e-05	0.000705169	-0.000407267	0.292417	0.000131127	0.000219931	0.00019686
17	2.5	0.1	10	-0.0937959	-0.000128048	-0.000114345	-0.109252	0.000158338	-0.00440303	0.00343522	0.00179139	-0.00623903	0.541006	0.197541	-0.00138491	-0.019126	0.0187211	-0.00024548	-0.000139125	-0.00107288	0.0778699	-1.94215e-05	0.00068662	-0.000131353
17	2.5	0.1	10	-3.10405	-0.000619611	7.51006e-06	-0.085091	-0.000404791	0.0044395	0.00042187	0.00113432	-0.00653223	0.129804	0.108939	-0.00152859	-0.0232321	0.0504949	-0.000298312	2.95272e-05	-0.000647909	0.0841849	-0.000111361	1.00554e-05	-0.000181017
17	2.5	0.1	10	-2.65794	-0.000674163	7.99813e-05	0.00636333	-0.000218591	0.000885416	0.0022415	0.00098956	-0.00327698	0.209703	0.0642492	0.000184766	-0.00973157	0.0351382	0.000259609	0.000652347	1.12704e-05	0.202137	0.000219212	8.52598e-05	0.000205939
17	2.5	0.1	10	2.52851	5.66812e-05	0.000219428	0.00104261	0.00053728	-0.00298453	0.00468448	0.00197251	-0.00291284	0.430209	0.156762	-0.000591229	-0.0125352	0.0178032	0.000493654	0.000938318	-0.000386198	0.370148	-0.000163824	0.000500341	-0.00036331
17	2.5	0.1	10	1.59742	-0.000440236	-0.000128974	0.0915175	-0.000229193	-0.00174994	0.00160374	0.000970303	-0.00644848	0.297393	0.0840174	-0.0013415	-0.0215352	0.0446792	-7.19848e-05	7.26903e-05	-0.000652874	0.101634	-0.000270427	0.000264101	-0.000189901
17	2.5	0.1	10	1.85587	0.000470521	0.000376575	0.293922	0.000460105	0.00237151	0.00224106	0.00138369	0.0018963	0.076695	0.073457	0.00240383	0.00837516	0.027833	0.00104279	0.000465904	0.00263685	-0.0456689	0.000269804	0.000354971	0.00229045
17	2.5	0.1	10	-1.17211	-0.00054968	-0.00016377	0.0584416	-7.57546e-05	-0.00297982	0.0020538	0.00109379	-0.00672318	0.385251	0.105522	-0.00180982	-0.025611	0.060227	-0.000227786	-0.000184008	-0.00122761	0.0831544	-0.000375563	0.000384342	-0.000465244
17	2.5	0.1	10	-1.84765	-0.000242734	0.000297917	0.0565844	-0.000140209	-0.00864031	0.00448792	0.00236511	-0.00426481	0.499727	0.221079	-0.00119051	-0.0186627	0.0272906	0.000228598	0.000681293	-0.00118073	0.497012	-0.000212494	0.000722626	-0.000759093
17	2.5	0.1	10	-2.04894	-0.000491965	0.000164739	0.0380564	-2.64813e-05	0.00853156	0.0033909	0.00122066	-0.000981316	0.229926	0.0738319	-0.000454711	-0.01179	0.0197776	0.000472132	0.00115609	0.000240922	0.315317	0.000256237	0.000346262	0.000161899
17	2.5	0.1	10	-0.80275	0.000506329	0.00065235	0.27226	0.000977801	0.00112919	0.000175793	0.000797862	-0.00676692	0.103521	0.0611341	-0.00170186	-0.0229603	0.032094	-0.000138682	4.60057e-05	-0.00101256	0.151594	-0.000113574	0.000720116	-0.000221238
17	2.5	0.1	10	2.57736	0.000376756	8.91801e-05	-0.13542	0.000470463	0.000801967	0.00183533	0.000913911	-0.00272361	0.15105	0.0545708	-0.000703022	-0.0145652	0.0246207	0.000123084	0.000429521	0.00030257	0.0992621	0.000494617	0.000798854	3.65555e-06
17	2.5	0.1	10	3.58113	8.49728e-05	9.53466e-05	-0.0974024	0.000200772	-0.00246572	0.00115369	0.00132676	-0.00447015	0.1398	0.108841	-0.000853576	-0.0147425	0.0182166	0.000209477	0.000546766	3.07883e-05	0.166872	0.000349082	0.000401305	0.000396885
17	2.5	0.1	10	-0.00356451	-0.000196025	0.000224276	0.0167887	0.000297028	0.000381794	0.00376455	0.00162572	-0.0036232	0.380321	0.131434	-0.00127377	-0.0172954	0.0121047	0.000171375	0.000673791	-0.00118372	0.494479	-0.000277442	0.000588432	-0.000482705
17	2.5	0.1	10	1.22179	0.000311488	2.72094e-05	-0.124164	0.000212431	-0.0020427	0.00138364	0.000838113	-0.0030969	0.119108	0.0486088	-0.00075245	-0.0167427	0.0375814	-5.5902e-05	0.000318483	0.00150331	-0.0205526	0.000669832	0.000818074	0.000338606
17	2.5	0.1	10	-0.386923	-0.000254188	0.00011993	0.0115516	0.000291326	-0.00464728	0.00356258	0.00119606	-0.00486371	0.438766	0.0977751	-0.00164233	-0.020274	0.010688	4.26752e-05	0.000221366	-0.00141836	0.345164	-0.000454092	0.000526798	-0.000672972
17	2.5	0.1	10	-2.59448	-0.000633784	0.000108279	0.02654	-0.000148494	0.00149812	0.00195718	0.00100805	-0.00326054	0.180869	0.0660027	2.22005e-06	-0.0115057	0.037974	0.000212587	0.00063041	0.000109709	0.181342	0.000278288	0.000197091	0.000309813
17	2.5	0.1	10	2.42919	0.000132077	-6.63312e-06	-0.0714062	0.000363709	-0.000451639	0.00149192	0.000918711	-0.00578477	0.24051	0.0711508	-0.000786725	-0.0172823	0.0400276	0.000115702	0.000422466	-0.000417029	0.193918	3.21694e-05	0.000494963	0.000258076
17	2.5	0.1	10	4.14306	0.000311963	0.000306017	-0.114124	0.000253073	0.00245175	0.000576038	0.000755483	-0.00249345	0.0279351	0.0391357	-0.000451253	-0.0129968	0.026873	0.0003078	0.00072171	0.000524899	0.15458	0.000449877	0.000202379	-2.04122e-05
17	2.5	0.1	10	-1.97681	-0.000367937	0.000427907	-0.0254601	0.000120137	-0.000727481	0.0036078	0.00170984	-0.00317231	0.339984	0.134551	-0.00057633	-0.0152318	0.0355758	7.22921e-05	0.00035915	0.000724693	0.0409259	0.000504302	0.000295552	0.000330104
17	2.5	0.1	10	1.86703	4.00673e-05	5.07516e-06	-0.0117151	0.000431455	-0.00122287	0.00359727	0.00225026	-0.0040411	0.387603	0.203783	-0.000693185	-0.0149392	0.0275718	0.000378188	0.000942562	0.000187643	0.262135	0.000166154	0.000314372	0.000424823
17	2.5	0.1	10	-2.96752	-0.00068441	9.23276e-05	0.0232954	-0.000185323	-0.00164419	0.00469139	0.00244229	-0.00521341	0.604286	0.254589	-0.00130558	-0.0202783	0.0341218	-1.30181e-05	0.000568745	-0.000577244	0.277709	9.08669e-05	0.000285849	0.000223052
17	2.5	0.1	10	-2.14185	-0.000367544	0.000153012	-0.0838936	0.000789622	0.00161544	0.00763399	0.0040622	-0.000433552	0.541081	0.291427	0.000834354	-0.00723837	0.0461013	0.000301687	0.00108385	0.00323364	0.0282378	0.000435619	0.000165843	0.000379823
17	2.5	0.1	10	-3.29458	-0.000748796	-5.18568e-05	-0.0291031	0.000511967	-0.000607799	0.00517435	0.00254618	-0.00433774	0.581457	0.242848	-0.0010536	-0.0185345	0.0347265	0.00020188	0.000372043	-0.000500174	0.189901	3.57705e-05	0.00112068	0.000355853
17	2.5	0.1	10	3.57818	0.000105989	0.000451262	-0.0442502	0.000125014	-0.00330226	0.00674908	0.00774293	-0.00385118	0.708198	0.778574	-0.0011726	-0.0182782	0.0252857	0.000108884	0.000182195	-0.000446261	0.112599	0.000160243	0.000630255	-0.000241005
17	2.5	0.1	10	0.747028	0.000309392	0.000408751	-0.0524312	0.000406645	0.0028633	0.00270532	0.00118884	-0.00139951	0.186956	0.0732213	0.000257868	-0.00907759	0.0344192	0.000214281	0.000751935	0.00130599	0.0863097	0.000663047	0.000927818	0.00035051
17	2.5	0.1	10	1.80028	0.000196321	0.00021619	0.0551854	0.000197286	-0.00158733	0.00163603	0.00102185	-0.00366663	0.162916	0.0695603	-0.00132995	-0.0188848	0.0203154	0.000326984	0.000875698	-0.000745179	0.438951	-0.000210937	0.000463551	-0.00036607
17	2.5	0.1	10	1.32024	-0.000390603	-9.16725e-05	0.0850665	-0.000240409	0.0025178	0.00289925	0.00157184	-0.0050395	0.372039	0.144769	-0.00103639	-0.0213972	0.0661126	-4.13752e-06	0.000513423	6.49701e-05	0.152112	-7.63158e-05	0.000488021	6.30961e-05
17	2.5	0.1	10	3.0367	0.000319755	0.000271694	0.00990778	0.000127916	-0.00667754	0.00139895	0.000910913	-0.00409591	0.153294	0.0600895	-0.000668251	-0.0154813	0.0326107	0.000178407	0.000276416	-0.000295528	0.124509	0.000670772	0.000436471	-0.000161508
17	2.5	0.1	10	-1.51832	-0.000259921	0.000207064	-0.0633532	8.31587e-05	-0.000427829	0.00489624	0.00417119	-0.00490631	0.599944	0.450759	-0.000976646	-0.016634	0.024293	9.72579e-05	0.000161096	0.000155155	0.0365162	0.000290111	0.000104613	0.000309853
17	2.5	0.1	10	1.99335	0.000345578	0.000342061	-0.0378312	0.000663616	0.00854779	0.000605685	0.000829361	-0.00157557	0.0140759	0.0435456	0.000860661	-0.00315819	0.0273995	0.000543255	0.00130239	0.00100916	0.241838	0.000473115	0.000537262	0.000338962
17	2.5	0.1	10	-1.10918	-0.000510365	-6.45667e-05	0.0835234	5.67296e-05	0.00161332	0.00318608	0.00140223	-0.00620573	0.502734	0.142178	-0.0017512	-0.0245928	0.0493715	-5.1006e-05	0.000210693	-0.0011665	0.263628	-0.000439727	0.000347391	-0.000323007
17	2.5	0.1	10	-3.04751	-0.000669154	0.000220438	-0.0155078	0.000135186	0.00347021	0.00299915	0.00124793	-0.00300372	0.272616	0.0879372	-0.000864125	-0.0171659	0.0346433	9.76945e-05	0.000247309	-9.11699e-05	0.0888636	-0.000100209	-0.000109889	0.000114787
17	2.5	0.1	10	-2.78782	-0.00059861	4.43356e-05	-0.0127138	-0.000318351	-0.000156857	0.000504911	0.00076486	-0.00390661	0.0518424	0.0437144	-0.000409259	-0.0128441	0.0278755	5.36664e-05	0.000283714	-0.000621979	0.178009	0.000239454	0.000459755	0.000182055
17	2.5	0.1	10	2.80769	0.000773742	0.000388572	-0.0221363	0.000384445	0.0148524	0.00601099	0.00478977	-0.00217467	0.508502	0.399619	-0.000469118	-0.0157581	0.0451508	0.00018282	0.000573579	0.00031863	0.138134	1.36939e-06	0.000196279	0.000395289
17	2.5	0.1	10	1.45587	0.00139177	0.000971725	0.152264	0.00158547	0.0121387	0.00192346	0.00137121	-0.00366776	0.192658	0.105669	-0.000348965	-0.00742743	0.00371223	0.000379775	0.000645371	0.000128386	0.183227	0.000221181	0.000163796	0.000387675
17	2.5	0.1	10	2.22576	0.00036849	0.000426912	0.135452	0.000499604	0.00515714	0.00289084	0.00156944	-0.00539929	0.396072	0.150335	-0.00130958	-0.0190828	0.0232118	-1.90576e-05	9.52952e-05	-0.000652885	0.110406	0.000118401	0.000174849	9.40687e-05
17	2.5	0.1	10	2.00982	0.000635758	0.000237532	-0.00138997	0.000396001	-8.92638e-05	0.00236848	0.00195051	-0.00343367	0.228708	0.161982	-0.00121826	-0.0183218	0.0228395	0.00027145	0.000583987	1.56041e-05	0.180433	0.0002989	0.00024816	-0.000190731
17	2.5	0.1	10	-2.88419	-0.000611548	0.000131228	0.0535901	-0.000279205	0.000869527	0.00221316	0.000977588	-0.00361244	0.220294	0.06471	-0.000708774	-0.014348	0.0229546	-1.42885e-05	5.54108e-05	-0.000548471	0.0803105	0.000250439	0.000389288	0.000258956
17	2.5	0.1	10	5.06725	0.000184365	0.000142241	-0.0297799	0.000218218	0.0190483	0.00447385	0.0022936	-0.000124533	0.28514	0.151191	0.000317273	-0.00592705	0.0212279	0.000483701	0.00090683	0.000265891	0.239768	0.000442615	0.00041561	0.00039689
17	2.5	0.1	10	-1.3738	-0.000306596	0.00017007	-0.0212009	0.00048665	0.018611	0.00660172	0.0051927	-0.000591635	0.469103	0.383495	-0.000346987	-0.0120409	0.0259187	0.000348051	0.000563163	0.00143131	0.0359516	0.000546626	0.000314813	0.00062023
17	2.5	0.1	10	2.72903	0.000203865	0.000447474	0.0866504	0.000452477	0.00487003	0.00359756	0.00186181	0.00189087	0.165822	0.10486	0.000996046	-0.00430691	0.0368592	0.000841352	0.00138052	0.000862578	0.279638	6.81954e-05	0.000549231	-0.000272114
17	2.5	0.1	10	-2.71657	-0.000334973	0.000395185	-0.0115437	-4.63325e-05	-0.0071	0.0029923	0.00228286	-0.00356246	0.297886	0.197889	-0.000768608	-0.0155861	0.028106	0.000131937	0.000387172	-0.000412592	0.180646	0.000110295	0.000147453	-0.000435692
17	2.5	0.1	10	-0.0354802	-0.000436822	2.38492e-05	0.0768826	0.000159765	0.000511198	0.00430385	0.00133843	-0.00367447	0.439071	0.102342	-0.00062268	-0.0164734	0.0426056	0.000329937	0.000875789	-0.000260537	0.321557	0.000227275	0.000399918	0.00035638
17	2.5	0.1	10	3.44337	0.000135445	-0.000134553	-0.0944189	0.00030965	0.00424102	0.00364768	0.00151035	-0.00229854	0.3023	0.10705	-0.000736954	-0.0116448	0.00673397	0.000365267	0.000974708	0.000141254	0.279137	0.000187581	0.00054321	0.000138994
17	2.5	0.1	10	-3.54784	-0.000910132	-0.000259318	-0.06235	0.000230687	0.000789254	0.00512153	0.0029202	-0.00486326	0.622538	0.301052	-0.00181833	-0.0249536	0.0481878	-0.000163158	6.23375e-05	-0.000563234	0.0849054	-0.000404768	-1.3942e-05	-9.47266e-05
17	2.5	0.1	10	-2.85754	-0.000639153	0.000168764	0.048929	-9.66008e-05	0.00314281	0.00282166	0.00157206	-0.0030298	0.256559	0.119544	-0.000722164	-0.0165962	0.0381025	0.000124627	0.000352403	0.000115202	0.0974858	-6.0669e-05	-0.000122307	0.000174021
17	2.5	0.1	10	4.12638	0.000935242	0.000201277	-0.098918	0.000553593	0.00482505	-0.000666909	0.000728338	-0.00211543	-0.0898214	0.0359125	-0.00106221	-0.00701348	-0.0237009	0.000196475	0.00095046	0.000486586	0.220609	0.000492753	0.000560589	4.46073e-05
17	2.5	0.1	10	2.99983	0.000298152	0.000181899	-0.0780785	0.000353547	0.01454	0.00472604	0.00313915	-0.00233061	0.401617	0.255199	-0.000973522	-0.0187439	0.0415885	5.48446e-05	0.000411299	0.000394736	0.0845775	-3.61187e-05	0.00056007	0.000426523
17	2.5	0.1	10	1.96529	7.20385e-05	0.000183074	-0.0210633	0.000553079	-0.000368487	0.0042204	0.00138283	-0.00379875	0.438416	0.108128	-0.000947706	-0.0147765	0.0136952	0.000270304	0.000547183	-0.000958648	0.361955	-0.000292855	0.000258105	-0.000460872
17	2.5	0.1	10	-1.00872	0.000358125	0.000378705	-0.0621261	0.000395025	-0.000437003	0.00693738	0.00661927	-0.00240439	0.607678	0.574916	-0.000813246	-0.0159376	0.0282172	0.00024389	0.00067831	0.000151436	0.189806	0.00031002	0.00114659	-8.7101e-05
17	2.5	0.1	10	-2.89748	-0.000267527	0.000260852	0.0249868	-1.29368e-05	-0.00375938	0.00231227	0.00123736	-0.00483835	0.289932	0.102384	-0.00108776	-0.0179541	0.0278394	0.000139022	0.000438221	-0.000633391	0.239519	0.000113761	0.000504992	-0.000437889
17	2.5	0.1	10	-2.29158	-0.000133492	0.000225377	-0.0513198	0.000209175	0.00177075	0.00481013	0.00217128	-0.00247151	0.416913	0.169296	-5.7298e-05	-0.0107821	0.0311583	0.000240495	0.000355998	0.000515746	0.0580185	0.000243001	0.000605202	0.000499845
17	2.5	0.1	10	0.176983	-0.000235919	0.000105711	-0.112335	-6.61914e-05	-0.00470384	0.00328439	0.00173363	-0.00636856	0.532811	0.192647	-0.00170309	-0.0209967	0.0123476	-0.000305255	8.30929e-05	-0.00106467	0.179119	5.44317e-05	0.000493103	-0.000103079
17	2.5	0.1	10	1.02483	-9.53987e-05	-7.23299e-05	-0.0822005	0.00010773	0.0182302	0.00336662	0.00149674	0.00151878	0.158993	0.082543	0.000357106	-0.00492658	0.0183285	0.000230349	0.000720375	0.000207864	0.19432	0.000410563	0.00024559	0.000190176
17	2.5	0.1	10	-2.2067	-0.000398855	0.000315006	-0.0779887	0.000673787	0.019963	0.00681454	0.00353571	6.65632e-05	0.453013	0.241869	-0.000471904	-0.0134651	0.0288065	0.000368405	0.000781634	0.00198605	0.0441683	0.000502951	0.00040661	0.000803789
17	2.5	0.1	10	-3.79151	0.000280064	0.000821378	0.283821	0.000745661	-0.000462828	0.00414779	0.00243915	-0.00559334	0.572701	0.265917	-0.00136894	-0.0204371	0.0312203	0.000132472	0.000201248	-0.00096489	0.211026	-3.10769e-05	5.89191e-05	-4.46977e-05
17	2.5	0.1	10	-3.19496	-0.000363939	8.30958e-05	-0.0387977	-0.000160593	0.0120691	0.00073683	0.000812296	-0.00315319	0.0573062	0.0462602	-0.00114034	-0.0208165	0.0514451	-0.000314899	-0.000181782	-0.000404251	-0.0220372	3.69619e-05	9.27639e-05	-2.43856e-05
17	2.5	0.1	10	3.55436	0.000206475	0.000225942	0.0691191	4.04917e-05	0.0219915	0.00610679	0.00243885	0.00599044	0.221835	0.115692	3.74855e-05	-0.00821649	0.021557	0.000641979	0.00153739	0.0013904	0.249592	0.000645031	0.000220182	0.000858755
17	2.5	0.1	10	-2.68848	-0.000285027	0.000354174	-0.0210711	-0.000232015	0.000625794	0.00358765	0.00199613	-0.00480669	0.437556	0.19093	-0.00117316	-0.0175891	0.0200049	-0.000107924	0.000273216	-0.000403572	0.138861	0.000266364	-2.26211e-05	0.000199174
17	2.5	0.1	10	0.81389	-0.000207806	5.7542e-05	-0.0347786	-5.22701e-05	-0.00264023	0.000366617	0.000848366	-0.0054695	0.0807025	0.0599783	-0.00113448	-0.0172193	0.0195775	-8.84488e-05	0.000567883	-0.000350532	0.233456	0.000101936	0.000233504	4.73727e-05
17	2.5	0.1	10	2.81727	-0.000114447	-0.000228647	-0.0840918	-0.000101198	0.00325065	0.00299387	0.00138404	-0.00444669	0.345756	0.115031	-0.00100124	-0.012006	-0.00314973	0.000224789	0.000558748	-0.00117842	0.436415	-0.000176272	0.000359553	-0.000536358
17	2.5	0.1	10	5.56331	0.00132767	0.000541538	-0.119417	0.00128472	0.0133965	0.00139015	0.00108211	0.00233485	0.0151893	0.0525935	0.000914838	0.00147103	0.0119676	0.000603227	0.00119739	0.00170211	0.147155	0.000697488	0.000767323	0.000472524
17	2.5	0.1	10	1.35388	0.000310621	0.000504701	-0.00291627	-0.000110427	0.00203495	0.00204811	0.000958138	-0.0034519	0.197081	0.0619404	-0.00046564	-0.0129905	0.0261708	8.14014e-05	0.000514425	1.83558e-05	0.15863	0.000350481	0.000799941	0.000378132
17	2.5	0.1	10	-2.71368	-0.000321594	0.000331209	0.0265107	-0.000161604	-0.00302126	0.00391445	0.00289547	-0.00491723	0.48446	0.299948	-0.00101231	-0.0178614	0.0315964	8.49098e-05	0.000333618	-0.000423256	0.16332	7.56683e-05	0.000329636	-0.000344417
17	2.5	0.1	10	-0.334693	0.00033012	0.000283872	-0.0878254	0.000351962	0.0104322	-0.000391033	0.000722022	-0.00155853	-0.0707735	0.0343975	0.000183588	-0.00555276	0.0150168	0.000274058	0.000884099	0.000223589	0.23956	0.00050134	0.000593583	-3.4683e-05
17	2.5	0.1	10	-0.695185	-0.000418678	-2.79332e-05	0.0419227	-0.000210456	0.00421746	0.00355575	0.00204701	-0.00595641	0.52966	0.225163	-0.00156824	-0.0218719	0.030895	-6.06634e-05	0.000331224	-0.000566884	0.18636	-0.000262047	0.000703065	-0.000123259
17	2.5	0.1	10	-0.674708	-0.000359787	9.91774e-05	0.13785	5.21181e-05	-0.00532887	0.00197811	0.000850673	-0.00403269	0.213212	0.0533158	-0.000822704	-0.0184014	0.0477776	0.000226495	0.000815326	-0.000471062	0.345588	-6.40639e-05	0.000740154	4.3664e-05
17	2.5	0.1	10	0.94799	-0.00013897	1.94947e-06	-0.0314632	-0.000136137	0.0121012	0.00388142	0.00194624	-0.00249834	0.332772	0.148929	-0.000450387	-0.0120439	0.0213663	3.76223e-05	0.000303921	-2.91682e-05	0.0993924	0.000372825	0.000292663	0.000180832
17	2.5	0.1	10	3.25577	0.000874147	0.00136902	0.120768	0.0016774	-0.00188016	0.00368402	0.00143163	-0.002436	0.311735	0.100991	-0.00053533	-0.0169327	0.051347	0.000400261	0.00108545	-0.00020155	0.379052	-6.05232e-05	0.000819996	0.000144231
17	2.5	0.1	10	1.77565	-0.000137783	0.000179806	-0.0165098	-3.2822e-05	0.00122399	0.00336138	0.00137675	-0.0037216	0.344177	0.106751	-0.000955865	-0.0156965	0.0190105	8.83895e-05	0.000361325	0.000230834	0.0874321	0.000247356	-0.000126073	0.000335961
17	2.5	0.1	10	4.38062	0.00176452	0.000402805	-0.133851	0.00149164	0.0254805	0.00363854	0.00147914	-0.000429361	0.231493	0.0913391	0.000847851	0.00174573	0.00924744	0.000729722	0.000972803	0.00111901	0.152865	0.000271796	0.000611923	0.000282289
17	2.5	0.1	10	-2.69197	-0.000698569	-9.27082e-05	0.031059	-0.000402928	0.0105911	0.000329046	0.00101881	-0.00410812	0.0379056	0.0718308	-0.000511714	-0.0133859	0.0264389	0.000176039	0.000549312	-1.63847e-05	0.174233	0.000243032	8.10503e-06	0.00030643
17	2.5	0.1	10	0.871159	-8.51111e-05	0.000107648	0.0616615	0.000183623	-0.00505264	0.000242413	0.000748766	-0.00353781	0.0162795	0.0410007	-0.000971451	-0.0166932	0.0250064	1.17459e-05	0.000309703	-0.000900882	0.244075	-0.000271459	0.000372336	-0.000572376
17	2.5	0.1	10	1.08418	0.000620446	0.000396407	-0.151398	0.000542952	0.00593353	0.00273476	0.00124239	-0.00255786	0.229313	0.0844172	-0.000403068	-0.0125746	0.0265376	0.000143037	0.000559324	7.64926e-05	0.164485	0.000385627	0.000750106	-1.47609e-05
17	2.5	0.1	10	-3.01881	-0.000701344	3.51624e-05	0.0253049	-0.000105369	0.000982749	0.00191186	0.00119029	-0.0060585	0.314019	0.110526	-0.00128761	-0.0204505	0.0370683	-0.000172117	-0.000135059	-0.000640174	0.0195532	-0.000174083	-2.41111e-05	-4.67722e-05
17	2.5	0.1	10	1.94367	0.000692692	0.000828972	0.255027	0.000855281	0.00688534	0.00431803	0.00383753	-0.00598503	0.636002	0.469263	-0.0014929	-0.0217557	0.0355077	-6.15842e-05	5.11913e-05	-0.000658009	0.0940391	8.83099e-06	-2.02977e-05	-7.51636e-06
17	2.5	0.1	10	0.953438	-0.000149552	0.000210261	0.102158	-5.62759e-05	-0.00446232	-0.000210105	0.00071527	-0.00424125	-0.0181018	0.0393156	-0.000903266	-0.0148499	0.0163765	6.1798e-05	0.00042622	-0.00108397	0.343117	-0.000257192	0.000187485	-0.000665781
17	2.5	0.1	10	-2.62723	-0.000301162	0.000329205	0.0531972	4.07635e-05	0.00200439	0.00164296	0.000875668	-0.0003826	0.076047	0.0445085	1.41762e-05	-0.00186446	-0.00361625	0.000359808	0.000335172	0.000657263	0.0403349	0.000670946	0.00075367	0.00037453
17	2.5	0.1	10	4.49885	0.0015351	0.000107506	-0.0448135	0.000134308	0.0244687	0.00280879	0.00132684	-0.000679769	0.174154	0.0808199	-4.18576e-05	-0.00952332	0.0249675	0.000365713	0.000830803	0.000899258	0.141547	0.000396549	0.000255508	0.000532475
17	2.5	0.1	10	4.70656	0.000819649	0.000390361	-0.129167	0.000521622	0.00692102	0.0034437	0.00140672	-0.00109443	0.23804	0.0895616	-0.00011673	-0.00973163	0.023049	0.000324627	0.000425533	0.000778474	0.0531714	0.000582182	0.000716976	0.000320924
17	2.5	0.1	10	-2.73154	-0.00073885	-1.57362e-05	-0.082928	2.40686e-05	-0.00457436	0.00293329	0.00161985	-0.00617838	0.464847	0.172061	-0.00143834	-0.0220977	0.0436641	-0.000267466	-0.000162685	-0.000512446	-0.0047173	-0.000158478	-0.000161412	-0.000139652
17	2.5	0.1	10	-3.04561	-0.000674736	0.000147639	-0.0881857	2.83553e-05	-0.00576656	0.00169283	0.000926654	-0.00595455	0.277403	0.0735112	-0.00161687	-0.0210435	0.0190775	-0.000124881	9.10996e-05	-0.000782495	0.129395	5.48242e-05	0.000699344	-7.33949e-05
17	2.5	0.1	10	1.18452	0.000128532	0.00017541	-0.0343066	0.000176119	0.0033311	-5.71858e-05	0.000736867	-0.00409954	-0.00407476	0.0412818	-0.000210278	-0.0107384	0.0245177	2.89277e-05	0.000244128	-0.000413826	0.13006	0.000268232	0.000457598	0.000306689
17	2.5	0.1	10	0.382299	-0.000264148	0.000186117	0.0680906	0.000367992	-0.00187103	0.00138518	0.00082516	-0.00770402	0.365367	0.0736058	-0.00216707	-0.0254525	0.0186332	-0.000120949	0.000272764	-0.00153987	0.420548	-0.000543395	0.000196921	-0.000445056
17	2.5	0.1	10	-2.54859	-0.000538849	0.00038291	0.0619752	-0.000282021	-0.00561096	0.00403796	0.00203233	-0.00484467	0.493301	0.195974	-0.000894868	-0.0156913	0.0221903	5.00969e-05	5.24696e-05	-0.000541181	0.0782385	0.000248421	8.57763e-05	0.000276218
17	2.5	0.1	10	1.6385	-0.000296633	4.84652e-05	-0.0381917	0.0002423	-0.000370258	0.0014017	0.000957022	-0.00475261	0.179246	0.0688874	-0.0010922	-0.0189405	0.0358732	-2.68282e-05	0.000239675	-0.000403834	0.127033	8.68923e-05	0.000808185	0.000252109
17	2.5	0.1	10	-2.57879	-0.000274365	0.000308948	-0.158566	0.000277975	-0.00844655	0.00285937	0.00299623	-0.0073533	0.579368	0.432543	-0.00217577	-0.0262446	0.0292031	-0.000318206	-5.59943e-05	-0.000904513	0.0876614	6.27414e-05	-9.78315e-05	-0.000536184
17	2.5	0.1	10	-2.98633	-0.00075599	-0.000126187	0.0742131	-0.000517097	-0.000597212	0.000222122	0.000816422	-0.00543744	0.0613636	0.0557569	-0.00149337	-0.0217859	0.0358004	-0.00018857	0.000267437	-0.000830807	0.211138	-0.000133648	0.00039653	-0.000177813
17	2.5	0.1	10	2.84467	0.00133769	0.000964305	0.163907	0.00122445	0.0127068	0.00660733	0.00681132	-0.00283543	0.608664	0.616146	-0.000432367	-0.0157944	0.047386	0.000258183	0.000260151	0.000501024	0.0336677	0.000119256	4.52374e-05	0.00067813
17	2.5	0.1	10	-2.04375	-0.00028675	0.000215814	-0.106299	-0.000106541	-0.00351324	0.00214992	0.00114894	-0.0039675	0.228786	0.0848576	-0.000621722	-0.0152684	0.0335009	-0.000172021	-0.000109052	-0.000290181	-0.00733207	0.000318487	-1.77272e-05	-0.000245124
17	2.5	0.1	10	0.550655	-8.34931e-05	0.00014279	-0.106453	-7.16111e-06	0.00442079	0.000805431	0.000937009	-0.00168844	0.0331114	0.0530552	0.000193122	-0.0108065	0.0417912	0.000106912	0.000257779	-0.000167676	0.101512	-0.000142403	0.000264257	-0.000387782
17	2.5	0.1	10	0.902388	-0.000198958	0.000287582	0.0952982	5.96244e-06	-0.00469383	0.00242039	0.00135908	-0.00272556	0.206205	0.096499	-0.000817315	-0.0154414	0.0245731	0.000155839	0.000486522	-0.000984114	0.342235	-0.000254335	0.000230466	-0.000437869
17	2.5	0.1	10	-1.75714	-0.000193923	0.000379913	-0.0322635	-8.48272e-05	0.00177481	0.00424819	0.00229542	-0.00133873	0.313595	0.165096	-0.000743013	-0.010765	0.00237631	0.000117118	0.000301773	0.000985342	0.00743553	0.000544284	0.000146691	0.000289941
17	2.5	0.1	10	-2.71624	-0.000216467	0.000333022	-0.00248985	2.89163e-05	0.00830578	0.00431874	0.002127	-0.00166327	0.333405	0.154843	-0.000447962	-0.0154944	0.0441921	0.000157475	0.000155772	0.000321995	0.0201233	6.60256e-05	-8.51621e-05	0.000412728
17	2.5	0.1	10	-2.95191	-0.000668738	-0.000143506	-0.0557579	-0.000275489	0.00288031	-0.000160686	0.000807123	-0.00649682	0.0431217	0.0606744	-0.00124728	-0.0204893	0.0402995	-0.00015037	3.18101e-05	-0.000787903	0.106028	-0.000164118	0.000546976	-4.01385e-05
17	2.5	0.1	10	-3.15535	-0.000901542	-0.000112308	0.138674	-0.000500451	-0.00581801	0.00133091	0.000918104	-0.00708641	0.302671	0.0826924	-0.00184456	-0.024809	0.0432845	-0.000263523	-0.000131158	-0.00126265	0.11649	-0.00041058	-1.57171e-05	-0.000441162
17	2.5	0.1	10	2.78069	0.000629533	0.000733239	0.113731	0.00106753	0.019547	0.00752937	0.00805307	-0.00181531	0.618673	0.670676	0.000145695	-0.0125785	0.0514014	0.000411282	0.00072739	0.00112642	0.0957996	0.000113625	0.000228347	0.0010619
17	2.5	0.1	10	1.37136	0.000298317	-6.98357e-05	-0.0678866	0.000707882	0.0141314	0.00506402	0.00389223	-0.00215485	0.422653	0.318729	-0.000507573	-0.016258	0.0471334	0.000425558	0.000771271	0.000284805	0.198404	-4.23857e-05	0.000532284	0.00102798
17	2.5	0.1	10	3.3519	0.000367255	0.000229315	-0.0142084	0.000105203	0.00518882	0.0030906	0.00167076	-0.00101251	0.206617	0.110478	-0.000516386	-0.016376	0.047631	4.83665e-06	0.000394788	0.000244722	0.0955907	5.22863e-05	0.000157418	-0.000113268
17	2.5	0.1	10	-3.38377	-0.000513831	0.000145105	-0.0506947	-0.00053565	-0.00331033	0.00269837	0.00217731	-0.00568357	0.392401	0.234692	-0.00136973	-0.0218395	0.0460242	-0.000174234	0.000213646	-0.000742698	0.172098	-0.000124589	0.000172822	-0.000224457
17	2.5	0.1	10	-0.695958	6.64686e-05	0.000628116	-0.0490056	0.00064465	0.00233103	-0.000449748	0.000854121	0.00071179	-0.0929262	0.0406932	0.00169697	-0.000197056	0.0403051	0.000558017	0.000406599	0.00209278	-0.0327973	0.000618585	6.74747e-05	0.000250547
17	2.5	0.1	10	4.39548	0.00256835	0.000299164	-0.112578	0.000319764	0.00587414	0.00141176	0.00102051	-0.00115284	0.0733903	0.0582408	0.00106485	-0.00233244	0.0303386	0.000361175	0.000804849	0.00269969	0.00899881	0.000921495	0.000760024	0.00123603
17	2.5	0.1	10	-2.90164	-0.0007386	-0.000148156	-0.00137764	-0.00020642	-0.0063003	0.000278421	0.000852599	-0.0067889	0.120133	0.0696375	-0.0010889	-0.0183075	0.030634	-3.07218e-05	0.000321291	-0.000775614	0.22202	3.81647e-05	0.000376231	-4.82529e-05
17	2.5	0.1	10	1.41986	0.00026918	0.000121115	-0.0453185	-0.000146771	0.00976505	0.00231357	0.00123005	-0.00340968	0.222189	0.0891107	-0.00114336	-0.0209552	0.0528053	-9.04394e-05	0.000257486	-0.000121133	0.0956974	0.000114604	0.000600318	0.000281752
17	2.5	0.1	10	4.5581	0.00060893	0.000210092	-0.0402517	0.000130213	0.0217287	0.00303975	0.0012935	0.000419378	0.162487	0.0731569	0.000496213	-0.00326524	0.0162453	0.000436841	0.000822729	0.000934657	0.13602	0.000464101	0.000299945	0.000451184
17	2.5	0.1	10	-0.619222	0.000762057	0.000415836	-0.170842	0.00115207	0.0105548	0.00254812	0.00121958	-0.0010493	0.16366	0.0740688	0.000614909	-0.0073083	0.0384668	0.000397863	0.000748724	0.00169553	0.0566419	0.00068137	0.00101894	0.000357458
17	2.5	0.1	10	-2.18106	-2.64374e-05	0.000149316	-0.0411023	7.77173e-05	-0.00165085	0.00244749	0.000951706	-0.0046293	0.294125	0.0675178	-0.00122696	-0.0180434	0.0201792	-0.000222649	0.000169297	-0.000354611	0.0955828	0.000287939	0.000455427	0.00050418
17	2.5	0.1	10	-2.6565	-0.000642197	-2.09833e-05	-0.0502954	-0.000398908	0.00853522	0.003434	0.00186347	-0.00482344	0.420744	0.175707	-0.00148099	-0.0207037	0.0257928	-4.54673e-05	0.000397455	-0.000289356	0.164814	0.000179487	2.80161e-06	0.000311235
17	2.5	0.1	10	-2.02816	-0.000525135	-0.000215799	-0.0887486	-0.000243071	0.000729126	0.00234931	0.0012446	-0.00646202	0.40666	0.124005	-0.00124054	-0.0217537	0.0550232	-0.000116754	-0.00011621	-0.00130027	0.131975	-0.000542924	0.000234919	-0.000235418
17	2.5	0.1	10	-2.54817	-0.000262014	8.55312e-05	-0.136799	0.000264523	-0.000700805	0.00438843	0.00271148	-0.00380245	0.456265	0.2474	-0.00111494	-0.0216984	0.0640248	-0.000146213	-3.06307e-05	8.27603e-05	-0.0144235	-1.67329e-05	0.000464129	-6.61547e-05
17	2.5	0.1	10	-0.766009	5.0284e-05	9.02802e-05	-0.0720091	3.86498e-05	0.000315152	0.00267234	0.00106202	-0.00381441	0.277002	0.0746187	-0.00107717	-0.0177292	0.026703	-0.000172339	0.000408011	-0.000239755	0.160956	0.000376285	0.000585606	0.000374925
17	2.5	0.1	10	3.65218	-6.32083e-05	-7.62765e-05	-0.0591665	-7.376e-05	0.00800194	0.0031799	0.00169032	-0.00272851	0.277855	0.127722	-0.000636696	-0.0124866	0.0154852	0.000303846	0.000731088	4.41051e-05	0.221343	0.000209338	0.000816658	0.000112964
17	2.5	0.1	10	-2.51679	-0.000244582	0.000194233	-0.107426	-2.22035e-05	-0.00310993	0.001157	0.000890262	-0.00441667	0.138243	0.0593895	-0.000857984	-0.017752	0.039836	-0.000287313	-0.000188901	-0.000561236	-0.00949642	0.000270988	0.000110522	-0.00019687
17	2.5	0.1	10	2.33486	-0.000313466	-6.66624e-05	-0.127234	0.000227962	-0.00256952	0.00447001	0.00261536	-0.00549819	0.604613	0.285333	-0.00135799	-0.0209997	0.037618	0.000141914	0.000428567	-0.000664549	0.242073	-0.000114885	0.00054764	-4.76203e-05
17	2.5	0.1	10	1.06968	0.000922499	0.000581361	0.0661883	0.00111584	0.00531963	0.00318957	0.00163533	0.00093398	0.160562	0.0950072	0.000652807	-0.00342842	0.0218898	0.0010305	0.0011775	-0.000329306	0.439832	-8.44344e-05	0.000746353	3.15386e-05
17	2.5	0.1	10	-2.36227	-0.000265395	9.40066e-05	0.135378	0.00056537	-0.00773844	0.00241124	0.0010803	-0.00637071	0.407832	0.099022	-0.00198821	-0.0239841	0.0184125	-0.000186739	5.60794e-06	-0.00156644	0.271188	-0.00048422	0.000572228	-0.000483728
17	2.5	0.1	10	-0.308372	-7.51624e-05	0.000207	-0.0720036	-0.000417177	0.000577359	0.000526535	0.000800158	-0.00486495	0.0808275	0.0511004	-0.00126887	-0.0183371	0.0198607	-0.000189791	0.00041547	1.93926e-05	0.12804	0.000527939	-4.8597e-05	1.52666e-05
17	2.5	0.1	10	-2.17298	-0.000606782	-8.14033e-05	-0.0560368	-0.000329951	0.0118434	0.00295038	0.00148399	-0.00440836	0.338626	0.125788	-0.000715191	-0.0139116	0.01996	0.000106984	0.000615809	-6.01028e-05	0.20148	0.000276372	0.000108575	0.000109244
17	2.5	0.1	10	-3.70997	-0.000946196	-0.000117309	0.154117	-0.000276114	0.00562875	0.00391446	0.00197715	-0.00601373	0.584155	0.217275	-0.00166641	-0.0239593	0.0481715	-8.57319e-06	0.000164131	-0.000930259	0.187486	-0.000381148	0.000194487	-6.91035e-05
17	2.5	0.1	10	-3.00459	-0.00077751	-0.000164009	-0.113483	-0.00021719	-0.00718917	0.000855027	0.000801585	-0.00671521	0.203749	0.0613374	-0.00147698	-0.0208853	0.0278036	-0.000119597	0.000157179	-0.00115735	0.235412	-5.5105e-05	0.000417922	-0.000164001
17	2.5	0.1	10	2.16366	0.0001944	0.000421899	-0.0770423	0.000492814	0.010358	0.00338143	0.0012166	-0.00140158	0.24363	0.0755558	7.38897e-05	-0.0101296	0.0328896	0.000360466	0.000804587	0.00116794	0.109797	0.000390703	0.000521326	0.000673496
17	2.5	0.1	10	1.48246	-0.000483434	1.31766e-05	0.0832321	8.02927e-06	0.0147394	0.00491836	0.00199367	0.00156134	0.26212	0.115688	0.000225605	-0.00285929	0.00619402	0.000749746	0.00112856	0.000317928	0.294625	0.000107824	0.000640409	-3.09916e-06
17	2.5	0.1	10	-2.30932	-0.000350136	0.000542792	0.0562888	-0.000598943	-0.00387562	0.0024675	0.00126129	-0.00394237	0.261464	0.0966212	-0.000449033	-0.0165287	0.0526269	-0.000232247	-4.42809e-05	-0.000321646	0.017892	0.000409486	-7.2687e-05	-5.91528e-05
17	2.5	0.1	10	2.63872	-0.000120614	8.65774e-05	0.056568	6.62431e-05	0.00934068	0.00326592	0.00166704	-0.00280179	0.28921	0.126296	-0.0014115	-0.0202674	0.0266622	-9.23258e-06	0.00018208	-0.000546838	0.127294	-7.36311e-05	0.00026988	0.000225434
17	2.5	0.1	10	-2.48042	-0.000199014	0.000287352	-0.0387883	0.000132149	0.0102451	0.00532981	0.00280164	-0.000812399	0.379084	0.199193	-0.000416391	-0.0195805	0.0866257	0.000304641	0.000872857	0.00135147	0.109059	0.000246976	0.000192312	0.000537156
17	2.5	0.1	10	-0.62353	-0.000323542	-0.000120379	0.000114405	-0.000432798	-0.000289115	0.00231617	0.00129202	-0.00584628	0.353896	0.121394	-0.00177148	-0.0222802	0.0189618	-0.000227388	-2.24823e-06	-0.00157309	0.268659	-0.000430388	0.000437843	-0.000549684
17	2.5	0.1	10	1.16896	-0.000311584	0.000206676	0.19167	0.000370655	-0.00243791	0.00474492	0.0022419	-0.00453706	0.54998	0.213453	-0.0013849	-0.0196778	0.0232671	0.000229252	0.000375563	-0.00116979	0.344509	-0.000365862	0.000406059	-0.000367374
17	2.5	0.1	10	-2.56821	-0.000702311	2.51385e-06	0.0428027	-0.000296972	0.00577778	0.00289028	0.00105384	-0.00351546	0.285212	0.0719794	-0.000905258	-0.016504	0.0272986	0.000148178	5.57434e-06	0.000118893	-0.00648523	0.000138548	-0.000145937	0.000452988
17	2.5	0.1	10	-0.83923	-0.000446533	-0.000120854	-0.00744727	-0.000295081	0.00890793	0.00205153	0.00103444	-0.00225803	0.156561	0.0637883	-0.000704418	-0.0116325	0.00808653	0.000311143	0.000813778	-0.000395087	0.328262	0.000184861	0.000397403	1.4683e-05
17	2.5	0.1	10	-2.57316	-0.000331601	0.000508047	-0.0196509	0.000640015	0.0250068	0.00314161	0.00197121	-0.000283635	0.188832	0.128164	-0.000308713	-0.0165773	0.0608048	0.000389013	0.00058148	0.00136522	0.0444899	0.000182731	0.000656205	0.000480986
17	2.5	0.1	10	3.1005	0.00063697	0.000329511	-0.121771	0.000170442	0.00397369	0.00705619	0.00854856	-0.00177581	0.575039	0.711268	-0.00119041	-0.0205934	0.0454133	-2.98464e-05	0.000243234	-0.000453081	0.135543	0.000211153	0.000642738	-0.000194729
17	2.5	0.1	10	3.93994	5.4031e-05	0.000169342	-0.0470097	-0.000326704	0.00559679	0.0028241	0.00124566	-0.00114908	0.189118	0.076689	-0.000616369	-0.0174502	0.0513328	-2.22757e-05	0.000516002	0.000107743	0.14734	0.000146156	0.000216521	5.52862e-05
17	2.5	0.1	10	-2.69713	-0.000492485	5.58557e-05	0.0736467	-0.000560758	-0.000440232	0.00198641	0.00139829	-0.00427019	0.224471	0.114659	-0.00140226	-0.0225624	0.0523412	-0.000235262	0.000129332	-0.000350052	0.081112	6.43701e-05	5.17335e-05	-4.77109e-06
17	2.5	0.1	10	-2.47535	-0.00049367	0.000140996	0.0326675	-0.000226312	-0.0029359	0.00143871	0.000949667	-0.00467575	0.180312	0.0675629	-0.000837053	-0.0159137	0.0267779	5.42274e-05	0.000263131	-0.000122874	0.0977249	0.000336056	0.000699178	0.00158588
17	2.5	0.1	10	2.95777	0.000552683	0.000145639	-0.0446276	0.000307683	0.0179963	0.00492687	0.00307902	-0.00323374	0.473614	0.27069	-0.000508521	-0.0144993	0.0338405	0.000221753	0.000628123	0.000150736	0.17506	0.000118682	5.69075e-05	0.000484221
17	2.5	0.1	10	3.47281	0.000677211	0.00027976	0.0331943	0.000900645	0.024117	0.0041102	0.0018461	-0.000910985	0.285445	0.123802	-0.000300037	-0.0141843	0.0418859	0.000451131	0.00122308	0.00100324	0.223836	0.000210963	0.000344531	0.000629783
17	2.5	0.1	10	-2.82126	-0.000503362	0.000200784	-0.068089	-0.000254562	-0.00771997	0.00147293	0.000910733	-0.00554315	0.224987	0.0683952	-0.00120881	-0.0193282	0.0318267	-0.000242778	-7.23444e-05	-0.00127699	0.149514	-8.40942e-05	-1.87306e-06	-0.000722722
17	2.5	0.1	10	-4.44259	-0.000877648	-7.92972e-05	-0.0798925	-8.93094e-05	-0.00290395	0.0053255	0.00220196	-0.00515811	0.676431	0.223615	-0.00218705	-0.0275962	0.0532088	-0.000287459	-0.000267851	-0.00126181	0.0468825	-0.000544574	-0.000117156	-0.000216549
17	2.5	0.1	10	-2.8245	-0.000439489	0.000155011	-0.000347896	0.000153722	0.00905709	0.00483852	0.00223793	-0.00210159	0.399731	0.170154	-0.000613371	-0.0172733	0.0499175	0.000260793	0.00037329	0.000459613	0.0678562	8.30409e-05	9.64031e-05	0.00103842
17	2.5	0.1	10	0.11912	0.000522617	0.000397631	-0.167614	0.000471456	0.00701645	0.00343979	0.00176002	-0.000175167	0.208418	0.111197	0.000552957	-0.00626271	0.0310134	0.000287343	0.000558863	0.000979671	0.0688897	0.00058599	0.000386693	0.00037507
17	2.5	0.1	10	-2.91575	-0.000610722	-2.79594e-05	-0.174102	0.000588758	-0.00412275	0.00260328	0.00117081	-0.00617052	0.41814	0.109299	-0.00177736	-0.0237438	0.0349994	-0.000239797	-0.000101851	-0.000757268	0.0471928	-3.02072e-05	0.000152283	-3.76452e-05
17	2.5	0.1	10	0.633069	0.000279437	0.000281814	-0.0869969	-0.000109536	-0.00352634	0.0019391	0.00109109	-0.00319529	0.176755	0.0738576	-0.000435111	-0.0157779	0.0471083	-0.000189986	-3.59108e-07	-0.000344733	0.0355011	0.00030398	0.000711503	-0.000134842
17	2.5	0.1	10	2.19503	0.000585206	8.4348e-06	-0.116846	0.000490011	0.00655072	0.000867099	0.000850524	-0.00160886	0.036907	0.0454293	6.16508e-05	-0.0101706	0.0326202	0.000222597	4.89903e-05	-0.000189303	0.0355724	-0.000245346	0.000199076	-0.000422204
17	2.5	0.1	10	-0.151484	-0.00023066	-6.74507e-05	-0.124371	6.91609e-05	-0.00632059	0.00529197	0.00437051	-0.00484537	0.640897	0.471086	-0.00115438	-0.0186075	0.0290868	4.37262e-05	0.000196864	-0.00063652	0.147097	8.48437e-05	0.000551281	0.000190808
17	2.5	0.1	10	0.325323	-0.000201906	0.000168943	0.0926469	7.22609e-05	0.0136824	0.00684311	0.00582089	-0.00244727	0.602135	0.503855	-0.000659941	-0.0177852	0.05185	0.000492486	0.000844524	-0.000112508	0.28294	-0.000345401	0.000307916	0.00050479
17	2.5	0.1	10	-3.21158	-0.00055429	0.000181586	-0.083309	-9.3555e-06	-0.00875216	0.00235247	0.00184511	-0.00695761	0.452834	0.226466	-0.00156538	-0.0220056	0.0325534	-0.000235664	0.000162695	-0.000897493	0.180296	-0.00014662	0.000111736	-0.000633368
17	2.5	0.1	10	-2.12458	0.000275984	0.000247598	-0.0705616	0.000541726	-0.000992914	0.00330789	0.0012027	-0.00234314	0.273378	0.0794589	-0.000751871	-0.0162442	0.0337613	-0.000141351	0.000252066	-0.000155144	0.0980969	0.00038068	0.00040663	0.000464913
17	2.5	0.1	10	4.27287	0.000111733	0.000741757	0.0462667	0.000775699	-0.00412197	0.00379236	0.00205976	-0.00628899	0.59674	0.236867	-0.0014958	-0.0222494	0.0408498	-1.66301e-05	0.000190901	-0.000535606	0.128867	-0.000126529	0.000539123	-1.88951e-05
17	2.5	0.1	10	1.75138	0.000672016	8.05902e-05	0.0159833	0.000302802	0.014913	0.00652458	0.00361089	0.00142084	0.375128	0.22617	-0.000103233	-0.00760999	0.0135251	0.000834851	0.00111904	0.000502155	0.263683	9.79613e-05	0.000786383	-1.25524e-05
17	2.5	0.1	10	3.13062	0.000284993	0.000565609	-0.0939032	0.000372896	0.000857715	0.00516023	0.00361707	-0.00250878	0.451282	0.30325	-0.00083616	-0.0166294	0.0320469	2.5828e-05	4.32879e-05	-0.000168191	0.0315303	0.000151326	0.000114792	-0.000274813
17	2.5	0.1	10	-0.141896	-0.000253177	6.04019e-05	0.0280903	-6.95076e-05	0.0123039	0.00374762	0.00147868	-0.00224612	0.309017	0.103762	-0.000689032	-0.0125798	0.0136237	0.000323769	0.000728002	-0.000391271	0.297231	0.000142153	0.000683707	0.000117563
17	2.5	0.1	10	-2.73772	-0.000605848	0.000181596	0.0684124	-0.000443661	-0.000752348	0.00301857	0.00148184	-0.00316659	0.2818	0.112083	-0.00101357	-0.0183444	0.0355535	-0.00020681	-5.28359e-05	-0.000115584	-0.00460228	3.88254e-05	8.04729e-05	0.000212696
17	2.5	0.1	10	3.25908	0.000547552	0.000449295	0.00846197	0.000528946	0.0240663	0.00516986	0.00311665	-4.4485e-05	0.334659	0.212254	-8.31898e-05	-0.0139821	0.050934	0.000501871	0.00113598	0.00165103	0.139049	0.000226138	0.000302449	0.000814638
17	2.5	0.1	10	4.19267	0.000766727	0.000272562	-0.027874	0.00081566	0.0231194	0.00562514	0.00251102	0.00129994	0.31831	0.152809	0.00147728	-0.000671529	0.0358684	0.000604254	0.000972393	0.00215325	0.0695149	0.000726313	0.000753368	0.0010921
17	2.5	0.1	10	-2.22024	-0.00049751	8.34149e-05	0.0847613	0.000172245	0.0198958	0.00399892	0.00200241	-0.000741596	0.270333	0.134745	0.000634445	-0.00938561	0.0510085	0.000462796	0.000509654	0.00103511	0.0528108	0.00015265	0.000312208	0.00122815
17	2.5	0.1	10	-2.7051	-0.000231191	0.000336311	-0.0362932	8.83616e-05	0.00118348	0.00210102	0.00119274	-0.0045205	0.248992	0.0941875	-0.000951347	-0.0185197	0.0409299	-0.000254678	-0.000171539	-0.000768935	0.0204344	0.00025272	9.75211e-06	-0.000136161
17	2.5	0.1	10	-0.391375	-0.000442544	-0.000109813	0.0749941	-0.000378779	-0.00190726	0.00143097	0.00109698	-0.00446442	0.170816	0.0829058	-0.00158492	-0.0225447	0.0370464	-5.40508e-05	0.000358921	-0.00124193	0.358819	-0.000438157	0.000317723	-0.000387074
17	2.5	0.1	10	3.49458	0.000547516	0.000374463	-0.0840284	0.000835823	0.0189417	0.00605548	0.00479353	-0.000883696	0.440529	0.360094	0.000229445	-0.013091	0.0589916	0.000310912	0.000444366	0.00109073	0.0334097	0.000128245	0.00013174	0.000605241
17	2.5	0.1	10	2.78853	4.82926e-05	9.76554e-05	0.0226279	-0.000393386	0.0050046	0.00159475	0.00112109	-0.000545204	0.0755594	0.0640554	4.93368e-07	-0.0129155	0.0471464	2.40025e-05	0.000323727	0.000140237	0.0861697	0.000186311	0.000446105	6.4047e-05
17	2.5	0.1	10	2.77732	0.000289675	0.000269524	0.0402198	0.000607343	0.0224312	0.00590242	0.00244958	7.50287e-05	0.384645	0.160791	-0.000213132	-0.0150518	0.0528008	0.000424403	0.00113079	0.000548408	0.260132	0.000154836	0.0005066	0.000627696
17	2.5	0.1	10	-0.324495	6.99436e-05	0.000205821	-0.0412089	0.000333886	-0.00324035	0.00313782	0.00169726	-0.00426777	0.351212	0.14757	-0.000275723	-0.0152511	0.0511957	0.000123451	0.000705346	0.0007333	0.12757	0.000255673	0.00102671	1.3299e-05
17	2.5	0.1	10	3.95957	0.000162441	0.000211564	-0.0555136	9.14305e-06	0.00168693	0.00351723	0.00161753	-0.0019636	0.276584	0.113764	-0.000577487	-0.0145434	0.0307176	0.00016515	0.000473559	0.000442683	0.096761	0.000370035	0.00040113	0.00209683
17	2.5	0.1	10	0.195003	0.00031914	0.000271622	-0.0491512	0.000278918	0.0103614	0.00271057	0.00123777	0.0016499	0.112259	0.0646831	0.000108438	0.00389703	-0.0162853	0.000140278	0.000511254	0.00132807	0.0317333	0.000843409	0.000727419	0.000810563
17	2.5	0.1	10	-2.80598	-0.00046649	0.000176981	-0.0465723	-0.000169517	0.00239731	0.00291613	0.00144512	-0.00452233	0.34147	0.12281	-0.000977869	-0.0195595	0.0492017	2.85171e-05	0.000102254	-0.00022452	0.0569971	-5.391e-05	9.85174e-05	0.000333044
17	2.5	0.1	10	3.0169	4.82961e-06	-2.1565e-05	-0.117362	3.83525e-05	-0.00588535	0.00192178	0.000938528	-0.00516935	0.261279	0.0693624	-0.0014966	-0.0201801	0.0199968	-0.00010237	0.000244737	-0.000542346	0.149922	8.17573e-05	0.000552904	0.000111591
17	2.5	0.1	10	2.83731	0.00027521	3.62067e-05	-0.0788822	0.000489778	0.0221112	0.00632268	0.00383772	-0.000326286	0.434396	0.271908	-0.000216586	-0.0125886	0.035066	0.000633774	0.00116737	0.000910681	0.221658	0.000134883	0.000676917	0.000895856
17	2.5	0.1	10	2.92395	0.000543664	0.000293753	-0.0250922	0.000559204	0.00152973	0.00274076	0.00126169	-0.000384194	0.160781	0.0742965	-3.57901e-05	-0.011565	0.0366955	0.000478183	0.00104151	0.000224106	0.28505	0.000112287	0.000655972	-0.000118259
17	2.5	0.1	10	4.90629	0.000488141	0.000161986	-0.0609889	0.000236606	0.0207304	0.00583589	0.0028195	0.000619752	0.357775	0.181602	-0.000128186	-0.00999508	0.0239496	0.000491951	0.00111171	0.000798693	0.221805	0.000352305	0.000660267	0.000379779
17	2.5	0.1	10	4.32006	0.000249248	0.000207432	-0.0453958	-2.989e-05	0.0194167	0.00403083	0.0014949	-0.000487911	0.263888	0.0929122	-0.000368685	-0.0122912	0.0264113	0.000288245	0.000819865	0.000591314	0.172701	0.000367098	0.00035618	0.000479941
17	2.5	0.1	10	2.71662	0.000268973	3.27581e-05	-0.040041	3.15516e-05	-0.00430396	0.00468906	0.00362503	-0.00593465	0.68051	0.437499	-0.00137297	-0.0209073	0.0355738	1.04771e-05	0.000466605	-0.000314134	0.192311	-5.74902e-05	0.000435663	6.41474e-05
17	2.5	0.1	10	-3.80665	0.000131045	0.000222749	0.100615	0.000523379	-0.0085308	0.0035395	0.00255329	-0.00688054	0.628893	0.333499	-0.00200128	-0.0244278	0.0224734	-0.000224698	-2.31627e-05	-0.00131524	0.183785	-0.000402628	0.000232113	-0.000483323
17	2.5	0.1	10	-0.637158	-0.000234933	-0.000129787	-0.075403	-0.000272763	0.017766	0.00235816	0.00157018	-0.00633333	0.397116	0.168443	-0.00185552	-0.0222803	0.0121796	-0.000400265	-0.000134199	-0.000846914	0.0459498	5.97688e-05	0.00039226	7.37816e-05
17	2.5	0.1	10	2.42091	0.000712216	0.00027103	-0.0116331	0.000880445	0.0283626	0.00696481	0.00600919	-0.00102378	0.521411	0.462681	-0.000182462	-0.0151127	0.0548605	0.000461203	0.000728326	0.00124934	0.08568	-0.000126301	0.000226153	0.000847014
17	2.5	0.1	10	3.10374	0.000302054	0.000364302	-0.115837	0.00013687	0.00480217	0.00171458	0.00100923	-0.00208673	0.121479	0.0608096	0.000195581	-0.0100811	0.0375669	0.000186046	0.00063608	0.00119377	0.0694301	0.000544957	0.000313451	0.000279768
17	2.5	0.1	10	-3.17427	-0.000609612	9.96705e-05	-0.00804314	-0.000257263	0.00453059	0.00259867	0.00190559	-0.00510462	0.339941	0.186295	-0.00127927	-0.0223955	0.060224	-0.000172479	-7.46898e-05	-0.000196302	-0.00446231	-0.000148016	-3.29855e-05	5.00554e-05
17	2.5	0.1	10	3.90384	0.000258803	7.67637e-05	-0.136829	-7.45449e-05	0.00358407	0.00212216	0.00122811	-0.0030441	0.18926	0.0862989	-0.000808879	-0.0186822	0.051322	-0.000287814	-6.76421e-05	-9.95041e-05	-0.010749	7.69134e-05	0.000366856	3.46119e-05
17	2.5	0.1	10	-0.78527	0.000314114	0.000265273	-0.0917812	0.000259799	0.00714784	0.00174137	0.001032	-0.00166355	0.112776	0.0611067	0.000360753	-0.00776433	0.0314487	0.000214017	0.000390705	0.000367581	0.0816097	0.000512827	0.000233116	0.000284485
17	2.5	0.1	10	-1.04804	0.00013152	0.000176608	-0.135161	0.000229357	0.00110687	0.00203738	0.00100767	-0.00339502	0.193835	0.0666509	-0.000568361	-0.0142706	0.0293526	-2.0279e-05	0.000327302	0.00030949	0.0696428	0.000348469	0.00104114	0.000452281
17	2.5	0.1	10	3.22771	0.000633451	0.000283152	-0.065654	0.000505193	-0.000579413	0.000966033	0.00088233	-0.00294823	0.0746331	0.052384	-0.000479683	-0.0129666	0.0253797	7.70408e-05	0.000348545	-0.000225458	0.139066	0.000174505	0.000301785	-0.000247152
17	2.5	0.1	10	3.54888	-3.5341e-05	5.88197e-05	0.0339712	-1.02965e-05	0.00887049	0.00634789	0.00661442	-0.00242411	0.555125	0.575482	-0.00095382	-0.0191222	0.0464177	0.000138683	0.000674609	0.000182813	0.184397	-8.00128e-05	0.000527569	0.000301309
17	2.5	0.1	10	4.48798	0.000119102	8.63515e-06	-0.110781	4.70677e-06	0.0196395	0.00527212	0.00380964	-0.00191594	0.42822	0.305158	-0.000780746	-0.0146525	0.0213022	0.000254488	0.000717042	0.000384291	0.170217	0.000257119	0.000227098	0.000187205
17	2.5	0.1	10	3.48873	5.55135e-05	8.88601e-05	-0.0537084	0.000231572	0.0190436	0.00522012	0.00365101	-0.00256838	0.460343	0.307992	-0.000541158	-0.0149932	0.0356613	0.000232412	0.000658806	0.000547634	0.135311	5.51619e-05	1.46806e-05	0.000709053
17	2.5	0.1	10	-1.90859	-0.000567608	-4.54908e-05	-0.0321096	-0.00018298	0.00529361	0.00487565	0.00147121	-8.01214e-05	0.313868	0.0887365	-0.000752142	-0.0149292	0.0245182	-7.71781e-05	0.000118408	-0.00020282	0.0599128	0.000190856	0.000249987	1.79274e-05
17	2.5	0.1	10	-1.60975	-0.000150392	0.000447932	-0.226695	0.00132014	-0.00573906	0.00599878	0.00617012	-0.00438277	0.677285	0.648357	-0.00150675	-0.0233134	0.0535308	8.94964e-08	0.000419123	0.000508458	0.0755623	0.00025594	-6.01162e-05	0.000436694
17	2.5	0.1	10	4.10871	8.51887e-05	0.00015954	-0.0601429	-0.000414195	0.00102792	0.00269663	0.00131731	-0.00205513	0.207616	0.0879703	-0.00055396	-0.0164823	0.0464563	-0.000142503	0.000183129	-0.000250212	0.0870456	0.000144815	0.000323136	-3.28618e-05
17	2.5	0.1	10	0.790856	0.000442204	0.000297704	-0.118858	0.000472774	0.00648107	0.00346433	0.00175754	-0.00189466	0.269201	0.125399	-0.000333264	-0.0117071	0.0246166	2.79047e-05	0.000429597	0.000910215	0.0435329	0.000469616	0.000998461	0.000574318
17	2.5	0.1	10	-1.78408	-0.000433274	2.27884e-05	0.00448712	-0.000101221	-0.00435635	0.00364212	0.00176972	-0.00463514	0.431606	0.161473	-0.000954164	-0.0170926	0.0289391	-1.55482e-06	0.000394786	-0.000579363	0.212535	9.50456e-05	0.000506049	0.000110391
17	2.5	0.1	10	3.08586	8.67411e-05	0.000248871	-0.015137	-2.96787e-05	-0.000495251	0.00129597	0.000854754	-0.00167424	0.0748817	0.0459611	-0.00060723	-0.0141026	0.0263672	3.49534e-05	0.000562258	-0.000174402	0.201988	0.0001668	0.000275502	-0.000398211
17	2.5	0.1	10	-2.10751	-1.93909e-05	0.000539784	-0.119035	0.000903756	0.014209	0.00707613	0.00350078	0.000909393	0.433814	0.226015	0.000254487	-0.00864607	0.031981	0.000378432	0.000819326	0.00194893	0.0537735	0.000642417	0.000549476	0.000976301
17	2.5	0.1	10	-2.52551	-0.000666568	7.34611e-06	0.00696762	-0.000255827	0.00649365	0.00490714	0.00306218	-0.00357765	0.494681	0.277962	-0.00106061	-0.0190297	0.0386951	-0.000130892	-0.000215252	-0.000221726	-0.0488486	7.25471e-05	0.000225939	0.000463195
17	2.5	0.1	10	-0.577166	0.000138387	7.26143e-05	-0.0431678	9.05604e-05	0.0180914	0.0054614	0.00284243	0.00155099	0.298885	0.172738	-0.000197885	-0.0115822	0.0297801	0.000306588	0.000923846	0.000862339	0.168089	0.000420341	0.000441774	0.00068322
17	2.5	0.1	10	-1.82714	-0.000257817	0.000475021	-0.0669061	0.000113682	0.00515863	0.00407543	0.00148854	-0.000958083	0.284416	0.0953489	-0.000129575	-0.0123261	0.0373171	0.000158003	0.000312821	0.000189287	0.0777197	0.000496915	0.000377004	0.000161688
17	2.5	0.1	10	-2.3934	-0.00062946	-0.000102342	-0.0975869	-0.000354662	0.00572673	0.0013409	0.000946447	-0.00552956	0.207387	0.0728724	-0.00117487	-0.0179217	0.0223817	-0.000216836	-0.000108927	-0.000609098	0.0259639	8.77482e-05	0.000467747	0.000110356
17	2.5	0.1	10	3.03117	-0.000252336	-7.14091e-05	-0.0226436	-0.000252544	0.0130013	0.00335478	0.0015646	-0.00273737	0.294726	0.115965	-0.000538341	-0.0163471	0.0461922	-4.64366e-05	0.000131628	0.000427033	0.00488499	0.000185299	0.000218022	0.000765082
17	2.5	0.1	10	-1.64406	0.000461847	0.000139512	-0.018977	0.000262167	0.0148895	0.00291848	0.00132592	-0.00138512	0.204335	0.0846136	-0.00097314	-0.0188699	0.0427803	0.000161261	0.000802763	0.000856092	0.139144	0.000228555	0.000516306	0.000576724
17	2.5	0.1	10	1.36023	0.0003727	-5.20724e-05	-0.196544	0.000318488	-0.00379022	0.000172818	0.000788907	-0.00413705	0.0216298	0.0470398	-0.000960411	-0.0197436	0.0522703	-0.000293443	-3.08984e-05	-0.000630414	0.058489	-0.000129787	0.000488811	-0.000389946
17	2.5	0.1	10	-1.69915	4.96298e-05	0.000782077	-0.0809841	0.000359405	0.0096757	0.00683096	0.00323674	0.00122458	0.403662	0.203331	0.000443044	-0.00812411	0.036395	0.000341889	0.000427533	0.000650704	0.0646753	0.0005894	0.000249654	0.000440971
17	2.5	0.1	10	4.03447	0.000115795	0.00012216	-0.0583118	5.48169e-05	0.017331	0.00495693	0.00226159	-0.000219796	0.325338	0.149739	-0.000294632	-0.0111861	0.0233908	0.000435862	0.000735284	0.000272291	0.189841	0.000328897	0.000188272	0.000374738
17	2.5	0.1	10	-4.26476	-0.000683346	0.000147426	0.110576	0.000435581	-0.00479135	0.00140921	0.000866433	-0.00684627	0.296808	0.0722469	-0.0021284	-0.0251246	0.0184447	-0.000155322	-9.30244e-05	-0.00157038	0.213078	-0.000525512	0.000222555	-0.000511525
17	2.5	0.1	10	-2.54819	-0.000824126	-0.000171854	0.0471966	-0.000270223	0.0106478	0.00157608	0.00140102	-0.00237792	0.11691	0.0977455	3.97442e-05	-0.0124383	0.0456504	0.000213502	0.0004004	-0.000130287	0.142909	-4.86875e-05	0.000400105	0.000343695
17	2.5	0.1	10	2.94951	-0.000170135	4.44097e-05	0.0390276	-0.00023315	-0.00130964	0.00310921	0.00185516	-0.00543508	0.426295	0.187069	-0.00145412	-0.0222275	0.0439437	-0.000137959	7.12522e-05	-0.0010296	0.166412	-0.000208447	0.000290777	-9.62246e-05
17	2.5	0.1	10	-2.16327	-0.000591358	-1.98435e-05	-0.0863049	-0.000183868	0.0112294	0.00259274	0.00144102	-0.0031958	0.241177	0.10834	-0.000626838	-0.0149016	0.0306767	5.11875e-06	0.000275205	6.18579e-06	0.086369	0.000241585	0.000498163	0.000399368
17	2.5	0.1	10	3.55969	0.000475206	0.000164605	-0.0383185	0.000724251	0.0220899	0.00642018	0.00291009	0.00131602	0.371991	0.179878	0.000413543	-0.00338126	0.0140519	0.000836595	0.00125861	0.00070926	0.270498	0.000156811	0.000362924	0.000282802
17	2.5	0.1	10	-2.6906	-0.000636341	-0.000136635	-0.103552	-0.000282967	-0.00262828	0.000639545	0.000866443	-0.00715632	0.196429	0.0751069	-0.001517	-0.0234886	0.0550938	-0.000237152	-9.26636e-05	-0.000897502	0.070836	-0.000220211	-3.56016e-05	-0.00025006
17	2.5	0.1	10	4.00835	-5.56595e-05	2.72734e-05	-0.0564818	-0.00023622	0.0120648	0.00534304	0.00291671	-0.00109793	0.393248	0.212879	-0.000750595	-0.0139378	0.0184101	0.000131165	0.00059352	-1.83259e-05	0.188271	0.000249794	0.000528917	0.000205752
17	2.5	0.1	10	2.56488	-0.000469244	-0.000272979	-0.155399	0.000753402	-0.0145321	2.38933e-05	0.0010622	0.000380654	-0.0562673	0.0564684	-0.00213562	0.02064	-0.0836469	-0.000330267	-0.000437231	0.00066034	-0.158445	0.00055479	0.0002117	0.000355455
17	2.5	0.1	10	3.25364	0.000255995	0.000425405	-0.098816	0.000320212	0.00118649	0.00253804	0.00130013	-0.00314142	0.23356	0.094035	-0.00116939	-0.0165392	0.0129867	-5.36157e-05	0.000190919	-0.000779927	0.169701	0.000126354	0.000150743	-0.000447038
17	2.5	0.1	10	0.968618	-0.000435896	-1.51536e-05	0.0197292	-1.13429e-05	0.000422775	0.00297915	0.00108702	-0.0036042	0.298592	0.0759031	-0.000502793	-0.0139834	0.0306605	0.000204224	0.000611843	0.000305424	0.15052	5.45022e-05	0.000368749	0.000168536
17	2.5	0.1	10	-1.74479	-0.000274281	-2.40243e-05	-0.136876	-0.000248882	-0.00136607	0.00268369	0.00224407	-0.00594894	0.41103	0.251595	-0.00144057	-0.0231465	0.0569803	-0.000409797	-0.000192298	-0.000281141	-0.0363963	-7.72236e-06	-4.55253e-05	2.96025e-05
17	2.5	0.1	10	-1.79579	-0.000308464	0.000170721	0.0198809	0.000227426	0.00407809	0.00383002	0.00129088	-0.000967363	0.264939	0.0794397	0.000433644	-0.00881621	0.0398107	0.000540142	0.000806409	0.00102451	0.123386	0.000210387	0.000358605	0.000485204
17	2.5	0.1	10	1.40089	0.000174723	0.000228853	-0.0257076	0.000336608	0.00353697	0.00674531	0.00616188	-0.00192725	0.557852	0.511464	-0.000644189	-0.015492	0.0339418	0.000267052	0.000611827	-0.00052015	0.281844	3.14892e-05	0.00112334	-0.000252571
17	2.5	0.1	10	0.264713	0.000314383	0.000677298	-0.0594095	0.000667842	0.0178142	0.00575843	0.00408887	0.000749125	0.347323	0.270139	0.000348201	-0.00876629	0.0362335	0.000507796	0.00143935	0.00222596	0.150431	0.000614827	0.000760541	0.00104047
17	2.5	0.1	10	3.51882	7.915e-05	-4.92686e-05	-0.058678	0.000224106	0.0232468	0.00654063	0.00414093	-0.000891801	0.479893	0.307914	-0.000510192	-0.0149832	0.0371629	0.000172799	0.000450478	0.000428033	0.0919632	-3.07373e-05	9.42071e-05	0.000494685
17	2.5	0.1	10	0.112755	-0.000424224	-7.10714e-06	0.0757005	2.82732e-05	0.00353592	0.00243744	0.00105559	-0.00382707	0.252932	0.0740216	-0.000946293	-0.0192317	0.0479771	5.0142e-05	0.000394502	-0.000740698	0.244378	-0.000280605	0.000497715	-0.000210975
17	2.5	0.1	10	4.37568	0.000968292	0.000435677	-0.123217	0.000627221	0.0145618	0.00527917	0.00283517	0.000140937	0.33566	0.188672	0.000363786	-0.0126932	0.0621403	0.000330807	0.000680172	0.00119313	0.079448	0.000274703	0.000316793	0.000432353
17	2.5	0.1	10	-2.96798	-0.00050757	-0.000100816	0.120818	9.96962e-05	-0.00283017	0.0015306	0.00111615	-0.0069832	0.326197	0.112729	-0.0019294	-0.0253705	0.0431015	-0.000303586	-3.64722e-05	-0.00107688	0.126204	-0.000463531	0.000476825	-0.000409691
17	2.5	0.1	10	-0.00637986	0.000221331	0.000608147	-0.00936318	0.000193622	0.010203	0.00507061	0.00229943	-0.000239039	0.334756	0.152824	0.000227761	-0.0107087	0.0426388	0.000194618	0.00071695	0.000505258	0.155594	0.00053044	0.000314173	0.000308583
17	2.5	0.1	10	0.346763	-0.000419256	-3.20492e-05	-0.016727	-6.98539e-05	0.00967737	0.00474433	0.00234647	-0.0022411	0.398559	0.181876	-0.000676939	-0.014121	0.0230926	0.000270953	0.000641735	-0.000539601	0.297025	4.80322e-06	0.000543119	2.01832e-05
17	2.5	0.1	10	4.75972	0.000535606	0.000248724	-0.0517586	-0.000104513	0.015368	0.00640328	0.00371588	0.000448733	0.405602	0.24865	-0.000191728	-0.0108684	0.0260034	0.000257292	0.000599805	0.000535809	0.120951	0.000279298	0.000502584	0.000414153
17	2.5	0.1	10	0.234076	0.000599335	0.000380994	-0.0932277	0.000716777	0.0164278	0.00438096	0.00199351	1.24827e-05	0.273394	0.127329	0.000353738	-0.00878958	0.0365744	0.00026478	0.000872621	0.00167248	0.0834982	0.000597314	0.000977259	0.000792764
17	2.5	0.1	10	1.61682	0.000666309	0.000339484	-0.124664	0.00042116	-0.00563486	0.00566422	0.00382199	-0.00212491	0.474533	0.311659	-0.000729394	-0.0173104	0.0435652	5.31241e-05	0.000156888	-7.06982e-05	0.0578525	0.000260517	0.00076147	0.000519729
17	2.5	0.1	10	2.79973	0.000302601	-4.43013e-05	-0.176838	4.1206e-05	0.00189765	0.00374091	0.00234108	-0.0026464	0.326763	0.187686	-0.00105567	-0.0206055	0.0551223	-0.00028193	-0.000242248	-0.000496593	-0.0354213	-0.000132335	-0.000135609	-0.000240458
17	2.5	0.1	10	-2.48023	-0.000471733	0.000132945	0.0363681	-0.00013487	0.0114202	0.0024832	0.00116299	-0.00161788	0.174886	0.0720981	-0.000707768	-0.0188059	0.0589129	4.52715e-05	0.000683507	0.000483354	0.149162	0.000102068	0.000251907	0.000403532
17	2.5	0.1	10	-1.44498	-0.000152569	0.000334551	-0.0349426	0.000201712	0.00539776	0.000935195	0.000950001	-0.0010586	0.0326422	0.0521717	0.000887136	-0.00778278	0.0511195	0.000142425	0.00024077	0.000958941	-0.00531084	0.000615528	0.000537878	0.000343819
17	2.5	0.1	10	-0.0291871	-0.000317923	-0.00016735	-0.0697729	-0.000117785	0.01397	0.00284572	0.00131293	-0.000550073	0.17343	0.0790671	-0.00122011	-0.00412355	-0.036541	-0.000144035	-5.75755e-05	-0.000354012	0.0166288	0.000161514	0.000438368	0.000269732
17	2.5	0.1	10	4.01279	0.000301233	0.000153613	-0.111825	-0.000156465	0.00479355	0.0032663	0.00163917	-0.00285694	0.291725	0.124223	-0.000653827	-0.0181452	0.055632	-0.000149262	0.000380373	0.000330808	0.0824487	0.000223445	0.000176912	0.000143626
17	2.5	0.1	10	-2.47629	-0.000520628	6.37057e-05	-0.00332067	-0.000157169	-0.00149922	0.00486031	0.00262441	-0.0032833	0.470228	0.226766	-0.00103912	-0.0188286	0.0382305	5.6057e-05	0.000434412	-0.000340124	0.185425	0.000257936	0.000513619	0.000325478
17	2.5	0.1	10	0.088248	0.000406915	0.000413033	-0.0898326	0.000429457	0.00465434	0.00526829	0.00280059	-0.000766727	0.372155	0.198442	0.000241038	-0.0102127	0.0401917	0.000283711	0.000719327	0.000440948	0.163882	0.000562395	0.000685616	0.000353445
17	2.5	0.1	10	1.28228	-0.000211267	0.000439784	0.0156939	0.00020189	0.00751292	0.00401742	0.0014469	-0.00066567	0.269083	0.0902161	0.000434849	-0.00876818	0.0395891	0.000230989	0.000301187	0.00123057	-0.00853005	0.000594112	0.000572043	0.000559579
17	2.5	0.1	10	-1.45793	-0.000383244	0.00015397	-0.114247	0.00023109	0.00351739	0.00480238	0.00537088	-0.0055302	0.650366	0.639051	-0.00149481	-0.022741	0.0469343	-1.23294e-05	0.000158996	-7.62105e-05	0.0591122	-0.000338091	-7.51601e-05	0.000267641
17	2.5	0.1	10	4.56103	0.000246575	5.57713e-05	-0.0532078	0.000197841	0.0192214	0.00665303	0.00459634	0.000595206	0.417343	0.309358	-0.000262215	-0.0116884	0.0276028	0.000297628	0.00065616	0.000645902	0.124084	0.000272314	0.000258329	0.00038086
17	2.5	0.1	10	0.138528	0.000364615	0.000455006	-0.0418991	0.000474038	0.00806947	0.00402283	0.00176257	-0.000492062	0.263409	0.113763	-0.000167901	-0.0112916	0.0293901	0.000460761	0.000977395	0.0008364	0.184118	0.000499455	0.00115103	0.000819566
17	2.5	0.1	10	-4.29485	-0.000790034	-2.81078e-06	0.160323	-0.000116898	-0.00420644	0.00193859	0.00098404	-0.00673925	0.36919	0.0891267	-0.00197995	-0.0251593	0.0345032	-0.000299379	-0.000199779	-0.00149563	0.130266	-0.000562112	6.92584e-05	-0.000507541
17	2.5	0.1	10	-0.932351	0.00033885	0.000313473	-0.101497	0.000378037	0.00748452	0.0061327	0.00348571	0.000538046	0.382331	0.230569	5.05193e-05	-0.0114357	0.0396227	6.03858e-05	7.85887e-05	0.000630908	-0.0239253	0.000507082	0.000367667	0.000223854
17	2.5	0.1	10	3.66633	0.000416459	0.000264444	-0.0861853	0.00046804	0.0090012	0.00508108	0.00198754	1.47337e-06	0.326228	0.126974	-0.000224401	-0.0132168	0.0387971	0.000511471	0.00104174	0.000690684	0.217798	0.000429665	0.000888014	0.000839147
17	2.5	0.1	10	3.26936	-0.000162573	-8.83256e-05	-0.018869	-0.000349435	0.016178	0.00159641	0.0010924	-0.00176188	0.102764	0.0667104	-0.000530258	-0.0111158	0.0130049	4.84384e-05	0.000196905	-0.000382482	0.108959	0.000205197	0.000157538	0.000277733
17	2.5	0.1	10	-1.9681	-0.00023935	-0.000149186	0.0859299	-8.23629e-05	-0.00203165	0.00204099	0.00148814	-0.00773486	0.485275	0.192105	-0.00183367	-0.0249149	0.0460086	-0.000299634	-0.000169287	-0.00153606	0.158068	-0.000533167	0.000360038	-0.000526152
17	2.5	0.1	10	2.42652	0.000116269	0.000261594	-0.0478965	-1.51452e-05	0.00181895	0.00322018	0.0015629	-0.00270596	0.280666	0.115507	-0.000599933	-0.0151816	0.0340035	0.000255858	0.000796417	0.000532359	0.173572	0.000393704	0.000764415	0.000679889
17	2.5	0.1	10	2.49276	0.00041259	0.000266145	-0.104238	0.00023332	0.00189835	0.00359585	0.00144246	-0.000880687	0.243043	0.0911539	0.000398583	-0.0121636	0.0597581	0.000103323	0.000473603	0.00154504	0.00965792	0.000506407	0.000277161	0.000314428
17	2.5	0.1	10	-1.08575	-0.000181158	9.89495e-05	0.0611574	-1.35316e-05	-0.00191692	6.98466e-05	0.000758405	-0.00263393	-0.0165701	0.0397226	-0.00039269	-0.0138993	0.0354125	4.46221e-05	0.000308021	-0.00081373	0.224457	-0.000104729	0.000527679	-0.000678755
17	2.5	0.1	10	3.80351	0.000106477	0.000181839	0.0143154	0.000163677	0.00344528	0.00346921	0.00133671	-0.00220599	0.282253	0.0906979	-0.000775062	-0.0168509	0.0371762	0.000388521	0.000723188	0.00030844	0.181617	0.000268736	0.000583744	0.000345485
17	2.5	0.1	10	-3.92094	-0.000629298	-0.000309276	-0.100678	-0.000613814	-0.00892551	0.000173892	0.000774444	-0.00831954	0.191379	0.0706685	-0.00223845	-0.0268538	0.0316263	-0.000470094	-0.000308452	-0.00195081	0.191495	-0.000620284	0.000263625	-0.00064406
17	2.5	0.1	10	-1.37254	-0.00015292	-0.000192368	-0.145174	-2.22383e-05	-0.00266689	0.000819826	0.000748284	-0.00657416	0.190512	0.0525037	-0.00180315	-0.0246605	0.0452249	-0.000190723	-9.47399e-05	-0.00107484	0.0987863	-0.000533344	0.000319755	-0.000282858
17	2.5	0.1	10	3.63035	0.000197012	0.000200363	-0.0799248	-0.000129323	0.0111896	0.00356681	0.00255667	-0.000851224	0.239716	0.180157	-0.000601631	-0.0173264	0.0510677	5.8126e-05	0.000395752	0.000730583	0.0496884	0.000122195	0.000469471	0.000355947
17	2.5	0.1	10	3.66807	0.000266883	0.000331591	-0.0655148	0.000303129	-0.00329286	0.00405022	0.00188439	-0.00123365	0.292949	0.129858	-0.000359842	-0.012521	0.0281717	0.000235214	0.000707398	-0.000143374	0.244154	0.000128271	0.000849406	-0.000198126
17	2.5	0.1	10	0.283499	-0.000221576	0.000312659	-0.0378802	0.000210295	0.00820955	0.005302	0.00318724	-0.00091391	0.381429	0.231715	0.000256315	-0.00878387	0.0327797	0.000257273	0.000390483	0.000989778	0.0281535	0.000742214	0.000551534	0.000474309
17	2.5	0.1	10	3.20801	-0.000290846	-0.000237811	-0.0521027	-0.000286058	0.010057	0.00121265	0.000889667	-0.00386455	0.125459	0.0567528	-0.000944353	-0.0175676	0.0332266	-3.59052e-05	0.000202303	-0.000231457	0.0911398	-0.000114184	7.02621e-05	0.000173925
17	2.5	0.1	10	2.99024	2.88324e-05	-2.37753e-05	-0.0589683	-0.000226687	0.00680244	0.00171535	0.00108881	-0.0042815	0.195071	0.0806367	-0.00125805	-0.021859	0.0549703	-0.00024284	-5.23612e-06	-0.00058598	0.0624956	-0.000139039	5.71223e-05	-4.27835e-05
17	2.5	0.1	10	0.122204	0.00035051	0.000510592	-0.0258863	0.000462638	0.0185584	0.00323074	0.00138909	0.00175166	0.144731	0.0743734	0.000579908	-0.00805945	0.0411951	0.0003312	0.000895064	0.00158251	0.094968	0.00064824	0.00120145	0.00091761
17	2.5	0.1	10	-4.04154	-0.000787878	0.000104959	0.10383	-0.000139605	-0.00766852	0.00160971	0.00103736	-0.00751194	0.385832	0.108062	-0.00179993	-0.0227213	0.0211494	-0.000206329	-0.000113369	-0.00168608	0.236892	-0.000438144	-3.82933e-05	-0.00061525
17	2.5	0.1	10	2.7678	-3.81854e-05	6.67144e-05	-0.0951125	6.57468e-05	-0.000577328	0.00031951	0.000791407	-0.00333888	0.0200412	0.0447491	-0.000978428	-0.0183098	0.0374054	3.78825e-05	0.000405465	1.28128e-05	0.125784	0.000237222	0.000537544	9.40531e-05
17	2.5	0.1	10	4.20627	7.16153e-05	-7.52088e-05	-0.0972512	-4.26987e-06	0.0147233	0.00455521	0.00244772	-0.00116097	0.331562	0.175409	-0.000605981	-0.0128173	0.018711	0.000159884	0.000601154	0.000159205	0.165965	0.00018348	0.000135112	0.000282305
17	2.5	0.1	10	4.11027	-0.00012798	1.37036e-05	0.00418599	3.39372e-05	0.00106888	0.00687982	0.00402594	-0.000478848	0.485009	0.289581	0.000112563	-0.0114579	0.042434	0.000439235	0.000580601	0.000239336	0.149728	0.000239869	0.000666896	0.00049805
17	2.5	0.1	10	-0.807542	0.000126969	6.14777e-05	0.0330193	0.000529398	0.0246644	0.00484196	0.00297746	0.00132834	0.263967	0.184331	0.000343069	-0.0065013	0.0247125	0.000563895	0.00124379	0.00114332	0.212416	0.000247052	0.000480013	0.000491665
17	2.5	0.1	10	3.05597	-8.56865e-05	9.84855e-06	0.0135037	-0.000348534	0.0051225	0.00158164	0.00109054	-0.00445975	0.187588	0.0821447	-0.00133481	-0.022291	0.0543451	-0.000307219	-0.000247043	-0.000525502	-0.0345736	-9.09026e-05	7.69296e-05	6.53429e-05
17	2.5	0.1	10	-1.78709	-0.000238572	-0.000128888	0.0211571	-0.000236567	-0.00078801	0.00126016	0.000953569	-0.00661883	0.258454	0.0832726	-0.00176182	-0.0248702	0.0526528	-0.000252265	1.44271e-05	-0.000992499	0.133609	-0.000220253	0.000232179	-0.000178287
17	2.5	0.1	10	3.02216	0.000487238	0.000116068	-0.0947334	0.000770851	0.00633167	0.00553792	0.00347964	-0.00278677	0.503731	0.297818	-5.59839e-05	-0.0119417	0.0381516	0.000537112	0.00082746	0.000356219	0.204532	0.000175086	0.000414674	0.00049968
17	2.5	0.1	10	0.866322	-0.000100018	-2.11416e-05	-0.0822216	1.0194e-05	0.0196899	0.00502386	0.00328181	-0.00295718	0.465495	0.28341	-0.000939581	-0.0155831	0.0191279	1.16254e-05	0.000419738	-0.0003093	0.175484	7.29664e-05	0.000730459	0.000182945
17	2.5	0.1	10	-2.06074	-0.00044077	0.000486009	0.0654897	-0.000391875	0.0022308	0.00318598	0.0011954	-0.00222478	0.257567	0.078118	-9.62109e-05	-0.0132371	0.0449139	-0.000108169	-2.69866e-05	-6.35808e-05	-0.000972021	0.000513985	2.86096e-05	8.22971e-05
17	2.5	0.1	10	-2.65996	-0.000394446	0.000479463	-0.0591686	0.000353122	0.00785433	0.0045966	0.00226628	-0.00198838	0.372629	0.171105	-0.000651869	-0.0166786	0.0426643	0.000157439	0.000631835	0.00105071	0.0801357	0.000453219	0.000183801	0.000676136
17	2.5	0.1	10	3.11142	-2.98962e-05	-0.000182507	-0.0841336	0.000181097	0.0127012	0.00397113	0.00163766	-0.00355061	0.397245	0.131792	-0.00121752	-0.0160897	0.00754761	0.000165838	0.000783934	-0.000569087	0.356858	-0.000123079	0.000400907	-0.000203731
17	2.5	0.1	10	0.62058	0.00014756	0.000149916	-0.0629668	0.000147633	0.00450132	0.0045106	0.00225182	-0.00177193	0.354823	0.16694	-0.000452089	-0.0151903	0.0416546	0.000221447	0.000396893	-0.000115886	0.139825	0.000359683	0.000930865	0.000536508
17	2.5	0.1	10	-2.17549	-0.000187165	0.000485864	-0.0283174	-0.000118987	0.00245881	0.0014779	0.000900128	-0.00211291	0.101115	0.0512026	8.39427e-05	-0.0118328	0.0435973	-4.71856e-05	0.00010567	-6.54968e-05	0.041113	0.000438974	0.000355055	5.57164e-05
17	2.5	0.1	10	0.587157	1.89464e-05	0.000163358	-0.0543231	4.5225e-05	-0.00289717	0.00234484	0.00128307	-0.00605469	0.373152	0.123203	-0.00141826	-0.0210976	0.0342038	-0.000275236	-0.000161859	-0.000559046	0.000404471	0.000126926	8.01189e-05	-7.14918e-06
17	2.5	0.1	10	4.66936	0.000530557	0.00108219	0.105825	0.00117246	0.00195143	0.00664724	0.00481693	-0.00254962	0.591427	0.415488	-0.000559819	-0.015571	0.0389328	0.000278386	0.000467095	-0.000431185	0.212262	-8.79996e-06	0.00061466	0.000284326
17	2.5	0.1	10	-0.614814	0.000114136	6.14672e-05	-0.0340187	-4.53789e-05	0.0119466	0.00305612	0.00147789	-0.00209649	0.241008	0.102515	-0.000984414	-0.0202454	0.0560703	-0.000132695	0.000191031	-1.94584e-05	0.0630849	5.0011e-05	0.000171445	0.000312124
17	2.5	0.1	10	1.2761	-3.60109e-05	-0.000164613	0.0179739	-0.000140399	0.0011693	0.00154208	0.000862577	-0.00387174	0.160467	0.0539246	-0.00100627	-0.0190744	0.0425906	4.29022e-05	0.000214562	-0.00131641	0.308276	-0.000412125	0.000188314	-0.0005038
17	2.5	0.1	10	-2.69954	-0.000268338	0.00029534	0.0144335	0.000305694	-0.00213221	0.00534943	0.00377731	-0.00208275	0.444124	0.306582	7.0687e-05	-0.0123714	0.0465869	0.000280023	0.000450908	-0.000352131	0.193101	0.000149882	0.000701016	-0.000159501
17	2.5	0.1	10	-1.77295	0.000299049	0.000296384	-0.0859313	0.000174794	0.00698747	0.00628994	0.00570098	-0.0027781	0.574338	0.507807	-0.000836149	-0.015841	0.0263185	2.54049e-05	0.000210763	0.000612582	0.0116931	0.000399688	0.000289525	0.000325348
17	2.5	0.1	10	1.66602	0.000241537	0.000439712	-0.0348643	0.000280352	0.0137113	0.00164901	0.00131964	-0.000310637	0.0750862	0.0784089	-0.00025295	-0.0119141	0.029323	8.12355e-05	0.000942978	0.000979386	0.160158	0.000532753	0.000590001	0.000470813
17	2.5	0.1	10	4.2497	-8.64984e-05	1.77437e-06	-0.0380659	-0.000208757	0.0200964	0.00537714	0.00324157	-0.000952486	0.389247	0.236773	-0.000736702	-0.0136529	0.017401	4.7332e-05	0.000237176	0.000258438	0.048935	0.000102162	0.000186356	0.000652114
17	2.5	0.1	10	-1.72949	-0.000392157	-8.83769e-05	-0.0421647	-9.39123e-05	0.00395499	0.00406807	0.00186659	-0.00331198	0.393129	0.151836	-0.000872745	-0.0154972	0.0220586	-2.86792e-05	0.000180882	-0.00029727	0.0921778	0.000160697	0.000551591	0.000274001
17	2.5	0.1	10	0.756441	-0.000275233	0.000233755	0.0964516	4.11155e-05	-0.00112375	0.003158	0.00167032	-0.00202888	0.247484	0.118998	-0.0010816	-0.0137504	0.00148344	9.76369e-05	0.000559469	-0.000498892	0.258298	-0.000104182	0.000465105	-0.000468791
17	2.5	0.1	10	1.10049	9.15686e-05	7.38127e-05	-0.0364012	0.000270665	0.0201696	0.00414619	0.00229808	-0.00014595	0.261074	0.15175	-9.40956e-05	-0.00949874	0.0227655	0.000694962	0.00162763	0.000557977	0.389914	0.000187159	0.000428442	0.000269344
17	2.5	0.1	10	1.62668	-0.000249852	-0.000257537	-0.0166583	-0.000295128	0.00534243	0.000678776	0.00087158	-0.00717206	0.20375	0.076092	-0.00139351	-0.0216374	0.0418596	-0.000173995	0.00011856	-0.000631774	0.116182	-0.000313351	0.000157458	-8.56738e-05
17	2.5	0.1	10	4.05875	0.000640248	0.000401361	-0.086982	0.000388848	0.00532109	0.00564686	0.0034226	-0.00129945	0.428095	0.258185	-0.000474768	-0.0144884	0.0354377	0.000203933	0.000710776	0.000861762	0.116084	0.0004269	0.000506566	0.000801479
17	2.5	0.1	10	3.96069	0.000332052	0.000432164	-0.0705013	0.000224877	0.00571256	0.00679773	0.00500761	-0.000578855	0.483805	0.368628	-0.000506757	-0.015286	0.0395578	0.000195796	0.000586687	0.00105002	0.0696461	0.000387587	0.00053508	0.000731607
17	2.5	0.1	10	-2.51462	-0.000732234	-0.000155641	-0.0239271	-0.000464211	0.00275781	0.000119787	0.000774088	-0.00568405	0.0558418	0.0515368	-0.00115275	-0.0180921	0.0250221	-0.00014256	-0.000146945	-0.000491624	-0.00106793	-9.92896e-05	0.000161647	0.000274693
17	2.5	0.1	10	-2.14934	-0.000146726	0.000393495	0.0131834	3.03314e-05	-0.000732454	0.00186279	0.000942598	-0.00243251	0.14468	0.0561492	-0.000454168	-0.0154493	0.0435201	9.16705e-05	1.60684e-05	-0.000218531	0.0277098	0.000290174	0.000328657	-9.3573e-05
17	2.5	0.1	10	-0.393004	1.95994e-05	0.000128969	-0.0423089	-0.000127579	0.0036168	0.0027209	0.00132759	-0.00208813	0.210915	0.0890969	-0.000389804	-0.014795	0.0418758	4.76884e-05	0.00039844	-8.24294e-05	0.135848	0.000340968	0.000637748	0.000446896
17	2.5	0.1	10	0.00390089	-3.16429e-05	3.98849e-06	-0.11491	9.24102e-05	0.0133426	0.00422107	0.00229995	-0.00241721	0.360032	0.180305	-0.00100768	-0.0164056	0.0209788	0.0001385	0.000519528	-0.000275232	0.203994	5.16728e-05	0.00107676	7.96311e-05
17	2.5	0.1	10	-2.70317	-0.000862865	-0.0002159	0.0899499	-0.000269145	0.00492603	0.00238154	0.000837914	-0.00520513	0.319711	0.0572397	-0.00144698	-0.0223396	0.0458745	-8.67482e-05	3.49192e-07	-0.000546822	0.0595704	-0.00037507	3.03997e-05	1.92891e-05
17	2.5	0.1	10	-1.65955	-0.000123981	0.000335026	-0.0419424	0.00026699	0.00784595	0.00592653	0.00366341	-0.000236818	0.399966	0.256857	0.000260835	-0.0128831	0.0588697	0.000288206	0.000319736	0.000589383	0.0419973	6.27095e-05	0.000405709	0.00035429
17	2.5	0.1	10	3.40351	0.000403379	8.63214e-05	-0.0757855	0.000291638	0.0063569	0.00255123	0.00146395	-0.00380776	0.263983	0.116721	-0.00114922	-0.0172481	0.0189366	-7.66756e-05	0.000215491	-6.88357e-05	0.0761896	-0.000180039	0.000408122	7.86737e-05
17	2.5	0.1	10	1.89516	-0.00025274	-0.000171955	0.0123227	-0.000258936	0.0129778	0.000533375	0.000731278	-0.0056113	0.107084	0.0456591	-0.00114352	-0.0195689	0.0383282	-0.00010417	-1.43463e-05	-0.000732393	0.0789588	-0.000281038	0.000196393	5.79663e-05
17	2.5	0.1	10	3.71104	0.000884547	0.000345946	-0.0819652	0.000357472	0.010328	0.00536516	0.00252818	0.00435926	0.217159	0.129997	0.000184115	-0.010089	0.0371463	0.000182001	0.00043159	0.000314162	0.0986033	0.00019317	0.000660157	0.000329064
17	2.5	0.1	10	1.07097	-0.000279473	-0.000130158	-0.00490798	-0.000461265	-0.000730106	-0.000733409	0.000674369	-0.00638249	-0.0428364	0.04086	-0.00141661	-0.022724	0.0532651	-0.000231806	-5.18508e-05	-0.00141686	0.193989	-0.000268817	0.000243086	-0.000310197
17	2.5	0.1	10	-1.98335	-0.000539143	0.000160222	-0.00502245	0.00021301	-0.00122409	0.00345553	0.00141942	-0.00299374	0.316268	0.104435	-0.000814008	-0.017376	0.0392345	0.000163579	0.000538744	1.87846e-05	0.166057	0.000180309	0.000292788	0.000177013
17	2.5	0.1	10	4.04167	0.0014639	0.000545567	-0.13727	0.000668444	0.0154906	0.00645572	0.00547835	-0.000195891	0.438401	0.394134	-0.000116905	-0.013223	0.0438504	0.00047818	0.000626709	0.00190255	0.0192691	0.000562872	0.000235318	0.000827802
17	2.5	0.1	10	-2.5313	-0.000423184	-8.17486e-05	-0.0565569	2.40059e-05	0.00916347	0.00470677	0.00271732	-0.00342918	0.46434	0.239248	-0.000970485	-0.0146137	0.0115978	0.00018347	0.000342457	-0.000845699	0.245669	-0.000168101	0.000600903	-0.000317477
17	2.5	0.1	10	2.06145	-0.000255354	0.000171653	0.0402472	9.33965e-05	0.0166711	0.00343533	0.00220091	0.000595748	0.186504	0.137515	-0.000200765	-0.0148096	0.0515026	0.000163434	0.000591875	0.00142101	0.0428251	0.000229084	0.000326232	0.000606554
17	2.5	0.1	10	-1.97174	-0.000548829	-0.000170158	-0.144184	-9.20531e-05	0.00722016	0.00393287	0.00162935	-0.00268556	0.346641	0.12155	-0.000780125	-0.0154317	0.0264412	-1.41025e-05	0.000290609	-0.000262572	0.124792	4.06836e-05	0.000462893	0.000329765
17	2.5	0.1	10	1.45284	-0.000300275	-0.000111843	0.142298	-0.000487019	0.00202726	0.000299184	0.00076194	-0.0025838	0.00397067	0.0399368	-0.000329422	-0.0165328	0.0592569	-0.000104643	5.09049e-05	-0.000506171	0.0730523	-0.000172743	0.000157498	-3.3143e-05
17	2.5	0.1	10	-3.45111	-0.000916751	-0.00024922	0.0321564	-0.000216874	0.00658716	0.00191777	0.000907452	-0.00661998	0.356318	0.0764267	-0.00179816	-0.0244364	0.042428	-0.000215218	4.4566e-05	-0.000609674	0.0846012	-0.000396746	0.000234783	1.72245e-05
17	2.5	0.1	10	0.0307633	0.000233032	0.00021	-0.116031	-3.75182e-05	0.000879238	0.00225905	0.00106418	-0.00311724	0.205299	0.0707788	-0.00106014	-0.0188416	0.0370192	-0.000229283	6.49684e-05	-0.000132961	0.0349796	0.000295551	0.000564891	0.000288193
17	2.5	0.1	10	-2.26713	-0.000319896	0.000394809	-0.0159989	-0.000188409	0.000263669	0.00146	0.000893761	-0.000661855	0.0673047	0.0465806	5.5843e-05	-0.012359	0.0458377	0.000181345	0.000366637	0.000186689	0.0937412	0.000284067	0.000220369	0.000113405
17	2.5	0.1	10	2.65566	-0.000233075	2.85859e-05	-0.0146848	0.000130863	-0.000774082	0.0014814	0.00118608	-0.0056552	0.232021	0.104979	-0.00136431	-0.020644	0.0335559	-3.03062e-05	0.000247293	-0.000316024	0.117365	0.000106165	0.000357189	-4.72792e-05
17	2.5	0.1	10	-2.37666	-0.000417543	0.000262878	0.038854	-0.000348677	0.00863772	0.00337147	0.00179739	-0.00267935	0.293697	0.137243	-0.000715468	-0.0159649	0.0336385	2.60464e-05	0.000505511	0.000601828	0.0894271	0.000375585	0.000266744	0.000364072
17	2.5	0.1	10	3.94069	0.00215556	0.000132133	0.10287	0.00109316	0.0185486	0.00660136	0.00689376	0.00979733	0.176764	0.291662	0.00200551	0.0224275	-0.0117814	0.000511399	-0.00025595	0.00317753	-0.178143	0.00032686	0.000312798	0.00280209
17	2.5	0.1	10	3.73803	0.000240554	0.000222796	-0.124025	4.0191e-05	-0.000537204	0.00519169	0.00364435	-0.00291652	0.479064	0.317129	-0.000897796	-0.017529	0.0356318	-1.79285e-05	0.000302523	0.000426028	0.0517023	0.00028531	0.00076515	0.000456296
17	2.5	0.1	10	-0.970248	0.000139859	0.000138675	0.0176335	-0.000105848	0.0016125	0.00345752	0.0021572	-0.00446599	0.399124	0.202328	-0.0013059	-0.0204285	0.0355643	-9.00364e-05	0.000373613	-0.000489654	0.188668	0.000190675	0.000741235	0.000262207
17	2.5	0.1	10	-3.27579	-0.000382907	0.000132761	0.0825637	-4.66029e-05	0.00381554	0.00480577	0.00218573	-0.00109531	0.349264	0.153162	-0.000688014	-0.0179021	0.0512673	0.000173125	0.000446115	-0.000389406	0.197629	-0.00019927	0.000161062	-9.00153e-05
17	2.5	0.1	10	2.86163	-0.000270173	-0.000102133	-0.00638051	-0.000203805	0.000224089	0.00392802	0.00319806	-0.00466676	0.466787	0.326598	-0.00143528	-0.0226978	0.0513602	-6.66679e-05	0.000333216	-0.000718588	0.215357	-0.00025814	0.000461189	-6.57393e-05
17	2.5	0.1	10	-2.85724	-0.0004894	0.000103458	-0.118147	-0.000307724	-0.00884245	0.00252664	0.00120343	-0.00587224	0.383925	0.109908	-0.00161989	-0.0228797	0.0381119	-0.000227409	0.000115051	-0.00114479	0.212103	-0.000138594	0.000359564	-0.000594353
17	2.5	0.1	10	3.51379	0.000488627	0.00025901	-0.110096	0.000325551	0.00541868	0.00148517	0.000913864	-0.000197577	0.0604128	0.0470012	0.000406334	-0.00935213	0.0417927	0.00026562	0.000677396	0.000570577	0.137691	0.000222581	0.000858334	8.25027e-05
17	2.5	0.1	10	-2.33809	-0.000435707	0.000192954	-0.0569396	-0.000173439	0.00490285	0.00402598	0.00195683	-0.00129858	0.293497	0.136489	-0.000476713	-0.0172965	0.0579899	-4.39271e-05	9.4322e-05	-8.56672e-05	0.0395678	-0.000152014	0.00035628	-3.94261e-05
17	2.5	0.1	10	1.90645	3.40908e-05	4.54956e-05	0.0499227	-0.000516316	0.000441284	0.00343372	0.0026737	-0.00358653	0.344305	0.238391	-0.00121774	-0.0224688	0.0662586	-0.000230317	0.000159474	-0.000463308	0.10681	-0.000137621	0.000432411	5.9917e-05
17	2.5	0.1	10	-1.34569	-0.000468085	-0.000180129	-0.0443407	-0.000485221	-0.00260898	-0.000322721	0.000735337	-0.00668564	0.0251744	0.0511841	-0.00198747	-0.0270534	0.0681526	-0.000446042	-3.08355e-05	-0.00123387	0.161016	-0.000254908	0.000325741	-0.000258468
17	2.5	0.1	10	-3.33199	-0.000835563	-0.000232972	-0.0594069	-0.000561701	-0.00336727	0.00134446	0.000897133	-0.00666245	0.273945	0.0752716	-0.00177929	-0.0244848	0.0449798	-0.00033189	-0.000217773	-0.00115114	0.0535356	-0.000178998	0.000111126	0.000117892
17	2.5	0.1	10	-2.63475	-0.000411855	8.35979e-05	-0.022904	-0.000183598	0.0051421	0.0034252	0.00166769	-0.00361832	0.34515	0.135691	-0.00151224	-0.0234174	0.0545055	-0.000239962	1.13098e-05	4.21324e-05	0.00169728	-5.31326e-05	-8.41534e-06	0.000142848
17	2.5	0.1	10	-2.82398	-0.000462934	0.000121799	-0.0789017	-0.000245207	-0.00865692	0.00226398	0.00101968	-0.00441814	0.262303	0.0738946	-0.00138158	-0.0210475	0.0363862	-0.000386779	6.9244e-05	-0.00116812	0.195466	-0.000102272	0.00019088	-0.000514759
17	2.5	0.1	10	-2.17527	-0.000239423	0.000396369	-0.11973	0.000261502	0.00511531	0.00208042	0.000912576	-0.0016549	0.141561	0.0508565	0.000245625	-0.0112329	0.0466977	-0.000129558	-0.00013404	0.000100318	-0.0468742	0.000214514	0.000246851	0.000108359
17	2.5	0.1	10	4.70494	0.000528934	-1.73035e-05	-0.183758	0.000551498	0.0331626	0.00793413	0.0101208	-0.000134063	0.547407	0.743777	-0.000148756	-0.00387634	-0.00229768	0.000343754	0.000551185	0.000636989	0.0978732	0.00011882	0.000238824	0.00059968
17	2.5	0.1	10	-2.62569	-0.000417044	8.55404e-05	-0.0185828	-9.92616e-05	0.0059879	0.00563237	0.003051	0.000557026	0.345571	0.199005	3.11156e-05	-0.0143771	0.0595978	0.000239221	0.000654398	6.09872e-05	0.195468	-0.000154464	0.000605519	4.4094e-05
17	2.5	0.1	10	0.939176	-0.000270792	-0.000181178	-0.000155106	-0.000229319	0.0064414	0.00203706	0.00111615	-0.00572965	0.309037	0.0966728	-0.00160165	-0.0218388	0.0279407	-0.000183571	0.000158465	-0.000968704	0.192938	-0.000247762	0.000401131	0.000162041
17	2.5	0.1	10	-2.93151	-0.000746226	-0.000281314	-0.108858	-0.000295063	0.00796148	0.00411946	0.0023828	-0.00445938	0.473189	0.227577	-0.00132031	-0.0216216	0.0472924	-0.000129527	-0.000174988	-0.000866629	0.0314173	-0.000263811	0.000233999	0.000153758
17	2.5	0.1	10	2.73994	-0.000289983	-0.000123978	-0.144189	-0.000281517	0.0155887	0.00523314	0.00271872	-0.00171537	0.414342	0.20635	-0.000890175	-0.0156171	0.0219422	-8.99958e-05	0.000213673	7.26532e-05	0.0603552	-1.16127e-05	0.000399677	0.000242076
17	2.5	0.1	10	3.72848	0.000503465	-3.47941e-05	-0.0117338	0.000272	0.017086	0.00712337	0.00220008	0.00593741	0.275666	0.103585	0.000768219	0.000680725	0.0104302	0.00035627	0.000594973	7.33298e-05	0.175702	7.94121e-05	0.000372057	0.000237531
17	2.5	0.1	10	-3.58799	-0.000664927	-7.48538e-05	0.140816	-0.000329669	-0.00785842	0.00437785	0.00383862	-0.00518011	0.562678	0.424632	-0.00150077	-0.0215229	0.0324254	-0.000183306	-2.57665e-05	-0.00144181	0.215193	-0.000415172	0.000225203	-0.000627308
17	2.5	0.1	10	-2.8602	-0.000661853	-0.000136773	0.0528646	-0.000126528	0.0122447	0.0024289	0.0016322	-0.0023536	0.19384	0.118596	-0.00062426	-0.0149965	0.0314607	0.000197431	0.000343014	-0.000140962	0.125797	-0.000119917	0.000285724	0.000454426
17	2.5	0.1	10	-3.6732	-0.000399855	-3.31898e-07	0.00793438	-0.000157238	-0.00749107	0.0028028	0.00257679	-0.00712385	0.542189	0.349726	-0.00187927	-0.0242497	0.0320066	-0.00016967	-0.000148425	-0.00162804	0.196269	-0.000525009	0.000140283	-0.000622158
17	2.5	0.1	10	-1.99767	1.50304e-06	-4.24071e-06	-0.133073	-0.000201978	-0.00361422	0.00231628	0.00115148	-0.00427468	0.261042	0.0874978	-0.0012438	-0.0200244	0.0359318	-0.000275901	9.98579e-05	-0.000343983	0.0701398	0.000192583	0.000316568	0.000116177
17	2.5	0.1	10	2.46581	0.000774035	0.000143531	-0.128966	0.000653504	0.0127436	0.00570888	0.00563562	-0.00210279	0.477213	0.472401	-0.000542034	-0.0183175	0.0641588	4.54217e-05	3.53432e-05	0.000334722	-0.0147304	-0.000192519	0.00021266	-0.000120932
17	2.5	0.1	10	3.12083	-7.39028e-05	-4.70787e-05	-0.111545	0.000157377	-0.00194028	0.00183726	0.000863496	-0.00500563	0.242439	0.0593014	-0.00125207	-0.0196938	0.0322735	1.97692e-05	0.000464108	-0.000190515	0.172258	6.28526e-05	0.000712672	-1.61245e-05
17	2.5	0.1	10	-4.80704	-0.00087923	-0.00010364	0.215614	-0.000508089	-0.00673959	0.00135966	0.000938808	-0.00675396	0.282583	0.0824289	-0.00200211	-0.0261502	0.0481018	-0.000346867	-0.000315481	-0.00148048	0.0605866	-0.000534256	0.000193023	-0.000564456
17	2.5	0.1	10	2.13954	-6.05316e-05	0.000251952	-0.0584863	0.000103074	-0.00415242	0.00398818	0.00268081	-0.00448227	0.460069	0.261752	-0.00134998	-0.0210661	0.0389023	-8.12821e-05	0.000123016	-0.000537093	0.103888	-0.000211965	0.000190428	-0.000709526
17	2.5	0.1	10	4.63059	8.89601e-05	-4.42112e-05	-0.0919298	0.000152723	0.0177332	0.00360426	0.00215769	0.00270589	0.148574	0.11874	-0.000119202	0.00612073	-0.0266904	0.000375994	0.000718542	0.00110816	0.0953443	0.00020846	0.00066362	0.000544605
17	2.5	0.1	10	3.57186	0.000302624	0.000133895	-0.0445511	0.000434541	0.0225869	0.00597359	0.00486081	0.00180117	0.324757	0.303397	-0.000503679	-0.00647382	-0.00544415	0.000468653	0.00088885	0.00131773	0.115467	0.000112443	-5.96947e-05	0.00117157
17	2.5	0.1	10	-0.403107	-0.00015196	0.000184817	-0.0225354	-0.000138227	0.00765745	0.00392298	0.00239823	-0.00305326	0.364571	0.200059	-0.00115345	-0.0221373	0.0668639	-0.000153565	0.00024799	0.000242285	0.0535819	1.07686e-05	-1.08024e-05	0.00014289
17	2.5	0.1	10	3.73705	0.000354049	0.000266489	-0.0417603	7.1773e-05	0.0110965	0.00485075	0.00262019	0.00060629	0.287682	0.167476	-0.000115774	-0.0128119	0.041107	0.000295656	0.000900775	0.00106777	0.141275	0.000351545	0.00016396	0.000574317
17	2.5	0.1	10	-1.89689	-0.00050429	0.000233642	0.0994476	-0.000214391	0.0198939	0.00443143	0.00230365	0.00104929	0.244093	0.140798	-0.000362109	-0.0166615	0.058614	0.000125021	0.000747317	0.000886674	0.122559	0.000184119	0.000264643	0.0004267
17	2.5	0.1	10	0.704284	-0.000213397	-0.000240221	-0.131552	0.000252977	0.00806751	0.00124258	0.000956023	-0.00379941	0.126495	0.0634208	-0.00115899	-0.0199922	0.0414012	-0.000186792	-3.10201e-05	-0.000372727	0.0278683	-0.0003448	0.000673956	-0.000151514
17	2.5	0.1	10	-0.566688	-8.08791e-05	2.40287e-06	-0.160574	-1.07156e-05	0.00432102	0.00288556	0.00166688	-0.00482669	0.356588	0.15269	-0.00126424	-0.0226841	0.0654519	-0.000107848	-6.33438e-05	-0.000886574	0.0817069	-0.000261631	0.000306839	-7.25942e-05
17	2.5	0.1	10	3.32381	4.9091e-05	0.000351647	0.00438025	0.000112082	0.00840774	0.00685051	0.00497047	0.000824258	0.421591	0.331007	-0.000177032	-0.0123161	0.0351309	0.000241229	0.000611263	0.000136788	0.17194	0.000129017	0.00068264	-2.37888e-05
17	2.5	0.1	10	-2.29473	-0.000493293	4.21943e-05	0.0105249	-0.000455636	-0.00150839	0.00259559	0.00136049	-0.00335877	0.24837	0.101796	-0.000778248	-0.0171848	0.0397047	-8.29989e-05	0.000284138	-0.00013035	0.105414	0.00022698	0.000471136	0.000191632
17	2.5	0.1	10	-3.42485	-0.000465436	-0.000107479	-0.143815	0.000128964	-0.00512625	0.00250717	0.00131856	-0.0036948	0.254196	0.100466	-0.00181346	-0.0252364	0.0532902	-0.000304713	-0.000182425	-0.0013999	0.118258	-0.000434207	0.000136688	-0.000728043
17	2.5	0.1	10	0.419021	0.000277685	0.000219527	-0.0742123	5.66737e-05	0.00228131	0.000854824	0.000856175	-0.00375	0.0844932	0.0527659	-0.000709092	-0.0167429	0.0400009	-0.000132214	3.57468e-05	-0.000405546	0.0550882	0.000167466	0.000890013	-0.000156221
17	2.5	0.1	10	3.24595	0.00118134	1.31194e-05	-0.150895	0.000481181	-0.00270981	0.00178186	0.000933365	-0.00565411	0.27103	0.0721056	-0.00147336	-0.0215889	0.0352123	-0.000206982	-6.43962e-05	-0.000131705	-0.00689706	5.61203e-05	2.23855e-05	-7.77414e-05
17	2.5	0.1	10	-2.43954	-0.000528951	0.000143184	0.0611944	-0.000399814	0.0146376	0.00452815	0.00171181	-4.49637e-05	0.286428	0.106633	-0.000813462	-0.0192211	0.0564704	2.08245e-05	0.000795685	0.000319426	0.200609	9.75562e-05	0.000174582	0.00018953
17	2.5	0.1	10	-2.72	-0.000425179	7.39486e-05	-0.0464235	-0.000216607	-0.000344632	0.00194932	0.000977869	-0.00385388	0.202731	0.0659993	-0.000455352	-0.0155765	0.0444461	9.24758e-06	0.000259843	-4.35551e-05	0.0872765	0.000234706	0.000567987	0.00024625
17	2.5	0.1	10	2.49112	1.6224e-05	-0.000149091	-0.132201	-0.000114627	-0.00335833	-1.04414e-05	0.000705963	-0.00719049	0.0929164	0.0493637	-0.00184268	-0.0260426	0.0646745	-0.000389518	-9.84166e-06	-0.00123677	0.172189	-0.000349476	9.89643e-06	-0.000396117
17	2.5	0.1	10	-2.52851	-0.000463419	5.65281e-05	0.129334	-8.6665e-05	-0.000541903	0.00160133	0.00122177	-0.00153261	0.0976521	0.076663	-0.000311874	-0.0152447	0.049283	0.000371794	0.00121221	-0.000262677	0.435354	-0.000152299	0.000512805	-0.000395129
17	2.5	0.1	10	2.98908	0.00022735	0.000297234	0.0137821	0.000210636	0.00899876	0.00469908	0.00187821	-0.000679619	0.323401	0.124353	-0.000261419	-0.0138912	0.0416756	0.000227439	0.00057634	-4.20788e-06	0.180893	0.000197491	0.000243683	-7.23947e-05
17	2.5	0.1	10	1.93113	-0.000692432	-0.000396879	-0.104905	-0.000585587	-0.000211935	0.000308444	0.000766194	-0.00705521	0.137703	0.058205	-0.00203309	-0.0260535	0.0427895	-0.000370463	6.92421e-05	-0.00115259	0.191907	-0.0005082	1.44976e-05	-0.000387552
17	2.5	0.1	10	-4.33089	-0.000859672	-1.71426e-05	0.132903	-0.000657698	-0.0090596	0.000944056	0.000898832	-0.00777967	0.293542	0.0876381	-0.00190569	-0.0250807	0.0411052	-0.00028794	-0.000274086	-0.00179457	0.164057	-0.000618101	-0.000103284	-0.0006938
17	2.5	0.1	10	0.641089	0.000101346	-2.19299e-05	-0.16264	0.000120319	0.000686477	0.00207413	0.00122297	-0.00429331	0.235201	0.0955444	-0.000900503	-0.0184214	0.043177	-2.32452e-05	0.000109479	-0.000702562	0.123701	0.000105354	0.000773423	1.91696e-05
17	2.5	0.1	10	1.97906	-0.000261352	5.78585e-05	-0.0180554	0.000434213	0.00385276	0.00014512	0.000856943	-0.00428697	0.0219433	0.0550782	-1.33374e-06	-0.0115752	0.03825	0.000291248	0.000836699	0.00103576	0.12942	9.12357e-05	0.000689226	0.000223921
17	2.5	0.1	10	2.9429	0.000519538	0.000146693	-0.140118	0.00131086	0.0210285	0.00476047	0.00217174	0.00129014	0.259563	0.129718	0.000847833	-0.00773422	0.0493793	0.000498865	0.00106892	0.000787373	0.21257	0.000243523	0.000414869	0.000385438
17	2.5	0.1	10	-1.68673	3.80885e-05	0.000249509	-0.063747	0.000236882	-0.00225847	0.00399089	0.00206582	-0.00347377	0.394737	0.174259	-0.00115422	-0.0199352	0.0411594	9.08304e-05	0.000542133	-0.000779648	0.312962	-6.87209e-05	0.000717207	-0.000341791
17	2.5	0.1	10	0.28792	0.000388536	0.000266197	-0.0423014	0.000250823	0.00387909	0.00114921	0.000885042	-0.00160628	0.0608921	0.0483632	-0.000375323	-0.0147658	0.0423884	4.38336e-05	0.000352916	-1.29634e-05	0.112707	0.000236646	0.000907147	1.16844e-06
17	2.5	0.1	10	-0.900999	-0.000195212	-1.2989e-05	0.0197972	1.18505e-06	0.00383435	0.00239449	0.00115218	-0.00294299	0.211831	0.0783075	-0.000954437	-0.020428	0.0602374	9.91733e-05	0.000628794	-0.00036776	0.257829	-0.000266048	0.000417674	6.3081e-05
17	2.5	0.1	10	-2.54108	-0.000614275	0.000190812	0.0687026	-0.000110838	0.0197357	0.00463551	0.00173518	-0.000262695	0.302432	0.109941	-0.000521197	-0.0144189	0.0326642	0.00014429	0.000277889	0.000814154	0.0137219	-4.2623e-05	0.000217803	0.000493787
17	2.5	0.1	10	-2.68896	-0.00046945	0.000279564	0.00769521	2.92412e-05	0.00896794	0.0053464	0.0038022	-0.00154593	0.415376	0.295433	-0.00117257	-0.0219432	0.0627444	-9.8786e-05	0.000342058	0.00046487	0.0589083	4.57075e-05	4.16681e-05	0.000199138
17	2.5	0.1	10	2.88806	0.000481017	0.000147944	-0.100578	0.000341268	0.00681008	0.0012186	0.00162656	-0.0011209	0.056921	0.107707	0.000397247	-0.00868955	0.0377048	0.000169655	0.000585069	-0.000205581	0.214504	-0.000106527	0.000333121	-3.52545e-05
17	2.5	0.1	10	3.01033	-0.000411323	-0.0001276	0.0717161	-0.000583139	0.00489123	0.00409901	0.00313365	-0.00432994	0.461512	0.307818	-0.00131579	-0.0217037	0.0486045	-0.000142718	0.000196246	-0.000624844	0.144943	-0.000260016	2.22437e-05	0.000182767
17	2.5	0.1	10	3.40176	0.000695033	0.000192878	-0.0483047	0.000804431	0.0249171	0.00416271	0.00168571	0.00215343	0.196393	0.0919777	0.00149026	0.00452489	0.0175522	0.000826944	0.000961313	0.00172738	0.0973563	0.000112773	0.000270839	0.000628581
17	2.5	0.1	10	-2.50443	-0.000683401	-0.000146988	0.00104533	-0.000402188	0.010189	0.00127366	0.00129257	-0.00532664	0.189143	0.11458	-0.00119257	-0.0193798	0.0333499	-0.000127402	0.000242783	-0.000413409	0.129522	-0.000138598	0.000211456	0.000135218
17	2.5	0.1	10	1.79166	-0.000308438	-0.000244722	-0.026555	-0.000441072	0.00104334	0.00132859	0.000989958	-0.00510207	0.185694	0.0751596	-0.000917536	-0.0185001	0.0428437	-0.000212713	-0.000205548	-0.000511066	-0.02062	-0.000316235	0.000132152	1.17776e-05
17	2.5	0.1	10	-4.33634	-0.000743886	-0.000129483	0.0418212	-6.17909e-05	-0.00852344	0.000712886	0.000704836	-0.00623574	0.157733	0.0446159	-0.000423371	-0.0161923	0.05115	9.22621e-05	1.10946e-05	-0.00136451	0.214409	-0.000515136	4.71793e-05	-0.000381748
17	2.5	0.1	10	0.275823	0.000121377	0.000157091	-0.123684	-9.85287e-05	-0.00399533	0.00353581	0.00373549	-0.0062132	0.552491	0.469482	-0.00176261	-0.0230932	0.0284177	-0.000385357	-0.000129315	-0.000935326	0.0606582	0.000123613	0.000710087	-0.000313043
17	2.5	0.1	10	-2.5007	-0.000486588	0.000113289	0.0365377	-0.000160231	0.0084353	0.00297818	0.00123841	-0.00120238	0.203436	0.0763619	-0.00103429	-0.0206582	0.057249	-0.000136714	0.000389045	0.000184877	0.100501	0.00010076	0.000207532	0.000177275
17	2.5	0.1	10	-1.73909	-0.000309243	5.27193e-05	0.131156	-0.0001637	-0.00317427	0.00385253	0.00180214	-0.00460346	0.453453	0.164651	-0.00164809	-0.0231626	0.0391733	-0.000148921	0.000211785	-0.00143311	0.34497	-0.000427856	0.000358878	-0.00057925
17	2.5	0.1	10	3.8076	0.000790124	0.000120843	-0.10339	0.000746481	0.0203453	0.00434308	0.00224662	0.00123426	0.232626	0.135293	0.00070802	-0.00434521	0.0275401	0.000578989	0.000967811	0.00133804	0.13099	7.26828e-05	0.000579107	0.0005633
17	2.5	0.1	10	3.12701	0.000126346	0.000146873	-0.0025628	0.000237262	0.0244551	0.00408476	0.00158311	0.000905639	0.224062	0.0915015	0.000299275	-0.00813934	0.031057	0.000626249	0.00111732	0.00143311	0.154659	3.0992e-05	0.000568547	0.000526634
17	2.5	0.1	10	-2.87872	-0.000565953	-0.000121829	-0.0208781	-0.000556018	-0.00473238	-0.000406817	0.000671131	-0.00539977	-0.0189517	0.0372777	-0.000836018	-0.0180316	0.0435868	-0.000193809	0.000126226	-0.000550164	0.10696	0.000168304	0.000578136	-0.000160715
17	2.5	0.1	10	-2.47491	-0.000295314	0.000447598	-0.0138367	0.000370057	0.00341053	0.0059387	0.00327936	-0.000524718	0.413987	0.232327	0.000116649	-0.0111504	0.0406832	0.000371493	0.00052163	0.00061469	0.0923815	0.000339832	-5.55086e-05	0.000514214
17	2.5	0.1	10	-2.58118	-0.0005053	6.14634e-05	0.0336052	-0.000344811	-0.00220211	0.000538888	0.000745219	-0.0025578	0.0257439	0.0383271	6.09166e-06	-0.0132942	0.0500999	5.94806e-05	0.000302145	-0.000129031	0.111056	0.000215138	0.000845155	0.000120428
17	2.5	0.1	10	2.43205	0.000396467	0.000490521	0.0521536	0.000835925	0.00538973	0.00534013	0.00396812	-0.00212482	0.445643	0.32468	-0.000685132	-0.0172069	0.0452203	0.000245214	0.000673291	0.000315569	0.166616	9.56756e-05	0.000364691	-6.8056e-05
17	2.5	0.1	10	0.392557	0.00025005	0.000306901	-0.0128418	0.00030729	0.00481075	0.0052056	0.00248695	0.000436489	0.319219	0.159684	0.000271142	-0.0118951	0.0522226	0.000376032	0.00053089	0.000751274	0.0819123	0.000225519	0.00109244	0.000276305
17	2.5	0.1	10	4.19419	0.0008052	0.00011448	-0.0635772	0.000722235	0.0332571	0.00467804	0.00215751	0.00233576	0.224857	0.121173	0.000766202	-0.00433786	0.0294262	0.000713997	0.00159115	0.00146458	0.252666	0.000115585	0.000514478	0.000796326
17	2.5	0.1	10	2.9933	6.1206e-05	1.75224e-05	0.0179104	0.00015144	0.0174132	0.00875947	0.00339849	0.00433488	0.409698	0.179382	3.3807e-05	-0.0115274	0.0394731	0.000420271	0.000890792	0.000899334	0.156065	3.53167e-05	0.00064808	0.000628068
17	2.5	0.1	10	-2.41396	-0.000639967	-9.58421e-05	-0.192004	-8.83889e-05	6.69667e-05	0.00304254	0.00188221	-0.00527456	0.405934	0.187002	-0.00155335	-0.0222982	0.0367731	-0.000279625	-0.000292638	-0.000677623	-0.0377732	-0.000277085	-0.000201276	3.6202e-06
17	2.5	0.1	10	-2.9309	-0.000505337	6.91451e-05	-0.110252	-4.97634e-05	-0.00392334	0.0013825	0.000945077	-0.00416175	0.153907	0.0641317	-0.000985953	-0.0184375	0.0380602	-8.87526e-05	0.000362405	-0.000440776	0.176428	0.000133825	0.000143887	-0.000117501
17	2.5	0.1	10	-3.19564	-0.000647685	0.000171515	-0.0213662	-0.000268453	0.0137374	0.0038547	0.00175999	-0.00240445	0.325911	0.130757	-0.000669364	-0.0165434	0.0405995	2.44399e-05	0.000228416	-0.000263675	0.103979	-0.00019799	0.000223422	0.000324946
17	2.5	0.1	10	2.23241	-0.00027764	-6.39932e-05	0.0850326	-9.30746e-05	0.00639137	0.00115522	0.00103678	-0.00208056	0.0716547	0.0632309	-0.000658329	-0.0181389	0.0552981	0.000283241	0.00127478	-0.000115217	0.421549	-0.000274482	0.000644745	1.00614e-05
17	2.5	0.1	10	2.73373	0.000195972	0.000318109	-0.127415	0.000265766	0.0106895	0.00638955	0.00738736	-0.000909001	0.46866	0.569373	-0.000384051	-0.0171909	0.0623083	-5.96322e-05	-8.88253e-05	0.000247479	-0.0437637	-8.49464e-05	0.000299263	0.000117849
17	2.5	0.1	10	-4.50495	-0.00072911	-3.35704e-05	-0.0237964	1.29945e-05	-0.00741875	0.0030112	0.00212596	-0.0069451	0.554525	0.269937	-0.00185828	-0.0252574	0.0488813	-0.000201439	-6.10965e-05	-0.00100036	0.101201	-0.000552524	1.61737e-05	-0.000496331
17	2.5	0.1	10	2.46517	0.000288644	-3.21657e-05	-0.037811	0.000169184	0.0133574	0.00805331	0.00705039	0.00202655	0.452625	0.441616	-0.000329254	-0.0120984	0.0270377	0.000270774	0.000555503	-0.000144078	0.195057	-3.81759e-05	0.000247406	0.000285561
17	2.5	0.1	10	-2.38981	-0.000414712	0.000227044	0.0102971	-6.81054e-05	0.00108545	0.0041536	0.00204332	-0.00110163	0.29627	0.141602	-0.000202038	-0.0135569	0.0421692	0.000228112	0.000678501	0.00019287	0.184168	0.000295806	6.11496e-05	0.000231133
17	2.5	0.1	10	-3.06159	0.000291601	0.000334131	0.0874066	-0.000517729	-0.00172435	0.00333735	0.00259499	-0.00440761	0.381881	0.25009	-0.00174755	-0.0255675	0.0662801	-0.000333165	9.84602e-05	-0.000556549	0.0975014	-5.85893e-06	9.37773e-05	-7.868e-05
17	2.5	0.1	10	2.92411	0.000177097	-5.77717e-05	0.0707909	-0.000261857	0.00601433	0.00436128	0.00337263	-0.00342187	0.429047	0.305123	-0.00114716	-0.0206694	0.0493167	1.61548e-05	0.000422532	-0.000425865	0.195437	-0.00031561	-0.000127694	0.000204826
17	2.5	0.1	10	-2.26167	-0.00063703	-0.000102005	-0.139068	-4.14842e-05	0.00690132	0.00408897	0.0013786	-0.00260925	0.357424	0.0974368	-0.000919234	-0.0154709	0.0194634	2.40926e-05	0.00010531	-0.000656272	0.114811	-0.00022997	9.69985e-05	-0.00017156
17	2.5	0.1	10	1.39772	0.000115242	2.8449e-05	0.0334045	4.65168e-05	0.0106409	0.00129863	0.00121537	-0.000885971	0.0588382	0.0729592	-0.000356968	-0.0154015	0.0481961	0.000193099	0.00070144	-0.00015605	0.24438	-0.000228735	0.000319169	-0.000301646
17	2.5	0.1	10	-3.14184	-0.000499629	7.05439e-05	-0.122986	-0.000374162	-0.00948476	0.00174392	0.00126042	-0.00561481	0.263818	0.114126	-0.00137726	-0.0228099	0.0577283	-0.000287721	-0.00025197	-0.00110093	0.0295978	5.04494e-05	0.000129005	-0.000239884
17	2.5	0.1	10	3.61861	0.000481811	5.43263e-05	-0.0573415	0.000616163	0.0295025	0.00334992	0.00142263	0.00197608	0.147723	0.0756956	0.000950303	-0.00277517	0.0286227	0.00077206	0.000906687	0.00187579	0.0756722	0.000136465	0.000500651	0.000817808
17	2.5	0.1	10	-2.67234	-0.000486904	0.000139212	0.0225188	-0.000237857	-0.00239691	0.00133465	0.000820142	-0.00253738	0.0989821	0.0452159	-0.000185612	-0.0149164	0.0531139	-2.82119e-05	0.00034364	-0.000185817	0.13199	0.000265058	0.00061576	0.000138497
17	2.5	0.1	10	2.69043	-0.000225949	5.23514e-07	0.017639	-9.86475e-05	0.00244736	0.00354782	0.00171824	-0.00293434	0.322289	0.13263	-0.000911688	-0.0198363	0.056536	0.000228285	0.000668797	-0.000369164	0.272074	-0.000275305	0.000345614	-1.40505e-05
17	2.5	0.1	10	1.83714	0.000390813	-3.70365e-05	-0.109295	0.000170268	0.0194609	0.0032411	0.00164016	-0.00144983	0.23356	0.111409	-0.000566805	-0.0142648	0.0293909	0.000148396	0.000589851	0.000722541	0.0994636	-0.000104667	0.000393231	0.000293015
17	2.5	0.1	10	-3.10271	-0.000650624	-7.70211e-05	0.027036	-0.000341144	0.00256968	0.00184485	0.00118529	-0.00224614	0.137577	0.0773283	4.28895e-05	-0.0168278	0.0828363	7.16369e-06	0.000353811	-8.19913e-06	0.112403	0.000357689	0.000494632	0.000233193
17	2.5	0.1	10	-2.62544	-0.000484431	0.00020758	-0.0485297	-0.000276275	-0.00630083	0.0032062	0.00229723	-0.00525283	0.42458	0.237829	-0.001371	-0.0205199	0.0318696	-0.000128341	-1.54746e-05	-0.000200233	0.0154382	0.000234602	0.000355551	-9.01982e-05
17	2.5	0.1	10	2.33456	0.000444253	-8.56839e-05	-0.104756	0.000599718	0.0216653	0.0044664	0.00166728	0.000531394	0.262519	0.0996254	-0.000145246	-0.0108882	0.028067	0.00032036	0.00100636	0.000364859	0.253126	-1.87065e-05	0.000629304	0.000489351
17	2.5	0.1	10	1.4921	-0.000247704	7.63204e-06	-0.0288319	2.27919e-05	0.0217388	0.00336944	0.00173957	-0.00298495	0.307535	0.135262	-0.000848209	-0.0153967	0.0226703	0.000104574	0.000847696	0.000350266	0.210991	-9.39304e-05	0.000405218	0.000234217
17	2.5	0.1	10	-2.45904	-0.00023812	0.00101675	0.0227884	0.00028413	0.0051907	0.00291177	0.00128436	-0.00166542	0.213034	0.0827213	-0.000420333	-0.0154461	0.0452549	0.000172361	0.000698148	0.000455025	0.156438	0.000240105	0.000525658	0.00023827
17	2.5	0.1	10	-2.91775	-0.000889857	-0.000246123	-0.138441	-0.000468844	-0.00342284	0.00145906	0.000912358	-0.00646549	0.277547	0.0757646	-0.00168243	-0.0241204	0.0489877	-0.000426984	-0.000449086	-0.00107655	-0.0654336	-0.000448397	-3.86934e-05	-0.000234047
17	2.5	0.1	10	2.8886	-2.36058e-05	0.000452017	0.00586387	-9.83535e-05	0.00693735	0.00647359	0.00651454	-0.00164	0.51648	0.529414	-0.00109718	-0.0212204	0.0593462	7.05888e-06	0.000350558	-0.000204654	0.136845	-0.000243295	-9.43734e-05	-3.09953e-07
17	2.5	0.1	10	1.05254	-0.000588887	-0.000144858	0.0144007	-0.000367028	0.0148439	0.00387465	0.00162906	-0.00312023	0.363424	0.126042	-0.00097699	-0.0155241	0.0167919	7.19447e-05	0.00026212	-0.00102077	0.251009	-0.000180531	0.000197299	-0.00018704
17	2.5	0.1	10	-2.90053	-0.000578867	6.30124e-05	-0.0313142	-0.000524577	-0.00698986	0.00162106	0.00136771	-0.00524298	0.22819	0.122828	-0.00118565	-0.0220199	0.0627256	-0.00041892	-0.000219262	-0.000904969	0.0175225	0.000179329	3.08452e-05	-0.000157985
17	2.5	0.1	10	-3.38515	-0.000589343	9.13995e-06	0.0683897	-0.000410834	0.00783204	0.00117296	0.0010104	-0.00588611	0.203487	0.084204	-0.00176335	-0.0268004	0.0910709	-0.000314382	0.00019583	-0.000783389	0.172345	-0.000331948	0.000138261	-0.000368475
17	2.5	0.1	10	1.44553	0.000127373	0.000146677	-0.0262914	0.000341882	0.00390765	0.00394327	0.00212725	-0.00319314	0.374101	0.175913	-0.000288054	-0.016729	0.0633565	0.000106598	0.000379696	-0.000315559	0.162726	-0.000114874	0.000178696	-0.000443421
17	2.5	0.1	10	3.08813	0.000150253	0.000255095	-0.0360652	1.36026e-05	0.00349062	0.00579157	0.00439513	-0.00133853	0.442135	0.339978	-0.000453064	-0.0150527	0.0405781	0.000163601	0.00062969	-0.000170142	0.223351	0.000111055	0.000576828	-9.91715e-05
17	2.5	0.1	10	-1.30909	-0.000175546	9.7376e-05	-0.0182916	-8.07708e-05	0.00501438	0.00287795	0.00141748	-0.00269259	0.247958	0.10173	-0.000934452	-0.0198286	0.0549188	9.20637e-05	0.000635715	-0.000207977	0.231653	-0.000249594	0.00041178	-0.000228372
17	2.5	0.1	10	-2.81766	-7.94671e-05	-2.48357e-05	-0.0415192	0.000212551	-0.00380689	0.000233323	0.000931602	-0.00467257	0.0411852	0.0654606	-0.00101466	-0.0186355	0.0380337	-5.69711e-06	0.000483694	-0.00134308	0.459202	-0.000330938	0.00044002	-0.000528045
17	2.5	0.1	10	2.42739	-0.000137531	0.000198876	-0.0327238	-4.45632e-05	0.00801518	0.00457933	0.00248031	-0.00094598	0.324601	0.175259	-0.000548769	-0.0185276	0.0659402	-9.08842e-05	2.16948e-05	8.52766e-05	0.00115598	-0.000151963	0.000469896	7.04626e-05
17	2.5	0.1	10	3.4211	0.000588852	0.000161115	-0.0595778	0.000559522	0.00892781	0.00369177	0.00130152	0.00121504	0.18844	0.0705402	0.000746779	-0.00659413	0.0395199	0.00053683	0.000665934	0.000824065	0.108712	0.000275795	0.000611286	0.000219501
17	2.5	0.1	10	-1.80824	-0.00032664	-2.9389e-05	0.0997044	-0.000341252	0.00258682	0.00284233	0.00137089	-0.0020976	0.222042	0.093009	-0.00148028	-0.0251998	0.0878604	-0.000228031	0.000461616	-0.000378282	0.201199	-0.000265428	0.000330726	-0.000368114
17	2.5	0.1	10	3.14327	0.000499508	0.00015618	-0.118607	0.000329671	0.00487224	0.00133625	0.000988767	-0.000729864	0.0588386	0.054281	-0.000467937	-0.0145345	0.036098	9.48749e-05	0.000272643	4.90427e-05	0.0807919	0.000322668	0.000111562	7.97749e-05
17	2.5	0.1	10	1.33106	-0.000361118	-0.000231159	-0.0685479	-0.000367461	0.0102791	0.00162815	0.00128772	-0.00395762	0.17277	0.099569	-0.00128137	-0.0206452	0.039482	-0.000255916	-0.000294719	-0.000673808	-0.0389494	-0.000344176	0.000226101	-1.26964e-05
17	2.5	0.1	10	-0.461262	9.3433e-05	0.000100916	-0.0141719	-3.45808e-05	-0.00351676	0.00180068	0.00108007	-0.00082972	0.0978707	0.0618885	0.000108306	-0.01176	0.0441891	0.000186524	0.000772197	0.000546766	0.165427	0.000260515	0.000826616	0.000213426
17	2.5	0.1	10	3.58081	0.000281834	-8.6305e-05	-0.108672	0.000388754	0.0257763	0.00499713	0.00250289	-0.00158424	0.387624	0.185866	-0.000614871	-0.0141684	0.0264157	0.000249473	0.000636159	0.000373519	0.149121	-8.85077e-05	0.000390661	0.000430358
17	2.5	0.1	10	-2.91705	-0.00091384	-0.000170768	0.123306	-0.000766545	0.00019304	0.00341318	0.00263083	-0.0058254	0.498299	0.299147	-0.00149933	-0.0230226	0.0502158	-0.000358437	-0.000345107	-0.00111399	-0.0124957	-0.000399095	0.000107598	-7.11144e-05
17	2.5	0.1	10	0.0171172	-0.000324786	-3.58982e-05	0.0466241	8.64289e-06	-0.000550722	0.000404691	0.000912534	-0.00287543	0.0192306	0.0550103	-0.00079491	-0.0175001	0.0413881	0.000203343	0.000588117	-0.000893039	0.361432	-0.00033763	0.000258996	-0.000385936
17	2.5	0.1	10	0.00940503	-0.000232233	-4.4819e-05	-0.00717084	0.000151745	-0.000203127	0.000420417	0.000927318	-0.00350495	0.0337074	0.0590603	-0.000414164	-0.0152856	0.0443311	0.000226707	0.000717823	-0.000239836	0.264567	9.97672e-05	0.000700482	3.78499e-05
17	2.5	0.1	10	-2.82644	-0.000767471	-5.13955e-05	-0.0780489	-0.000302422	0.000794493	0.00376985	0.00146246	-0.00357646	0.378173	0.114165	-0.00124831	-0.017552	0.0153442	-4.00729e-05	6.57393e-06	-0.000786691	0.0955095	-0.000212608	0.000147253	-0.000184598
17	2.5	0.1	10	-2.65337	-0.000521222	0.000288777	0.0176398	-0.000288702	-0.00538142	0.0042378	0.0021613	-0.0046971	0.504885	0.207802	-0.000767198	-0.0176087	0.043943	-0.000139355	-0.000260478	-0.000320348	-0.0565356	8.10701e-05	-0.000178608	-0.000199298
17	2.5	0.1	10	4.07396	0.000409324	0.000812132	0.0893807	0.000231773	0.00780659	0.00335701	0.00129369	0.00229746	0.141401	0.0662097	0.000770063	-0.00772625	0.0464473	0.000625369	0.000969741	0.000843196	0.181464	0.000411022	0.000261265	0.000489807
17	2.5	0.1	10	-2.19053	-0.000489016	0.000122788	-0.12009	0.000472834	0.0273771	0.0074154	0.00855038	-0.000959681	0.554152	0.665546	-0.00065676	-0.0166074	0.0418119	0.000239454	0.000331204	0.00141067	-0.0126205	-9.3875e-05	0.000610039	0.00081341
17	2.5	0.1	10	-1.43548	-0.000163216	3.33305e-05	-0.101009	0.000282689	0.00866977	0.00648828	0.00621862	-0.00312542	0.619452	0.575201	-0.000939813	-0.0155996	0.0192228	0.000293399	0.00023202	-0.000473237	0.134518	-0.000164696	0.000545381	-4.30225e-05
17	2.5	0.1	10	7.59903	0.000146501	1.63575e-05	-0.0802857	0.000121566	0.0112325	0.00404573	0.00217361	-0.00331693	0.391184	0.18252	-0.000925688	-0.0172855	0.0320612	0.000226278	0.000595363	-2.73455e-05	0.190166	-0.000147655	0.000571317	0.000358395
17	2.5	0.1	10	3.5373	3.28041e-05	-0.000121317	-0.0614584	-9.36149e-05	0.015749	0.0037255	0.0021141	-0.00222591	0.306135	0.160749	-0.000630142	-0.0160261	0.0386696	0.000133351	0.000474751	6.13678e-05	0.140838	-0.000154415	6.43734e-05	0.000301208
17	2.5	0.1	10	0.512268	0.000515709	0.000102636	-0.144712	0.000100012	-0.00621498	0.00253052	0.00117164	-0.00367957	0.255924	0.0851307	-0.00121446	-0.019673	0.0345911	-0.00019325	0.000232762	-0.000404871	0.124736	0.000182768	0.000957433	-9.52654e-05
17	2.5	0.1	10	-3.33161	-0.000672476	-9.28437e-05	0.0846734	-0.000567007	-0.00128722	0.000640762	0.000883752	-0.00328094	0.050799	0.0537549	-0.000276442	-0.0193101	0.0923669	0.000121577	0.000479224	-0.000318477	0.19735	-0.000304693	9.72832e-05	-0.000173834
17	2.5	0.1	10	3.3572	8.55106e-05	-4.12645e-06	-0.0825846	0.00023953	0.0168562	0.00581649	0.00432817	-0.000683964	0.411831	0.317897	-0.000713424	-0.0152952	0.028959	0.000390873	0.00132958	0.000286144	0.356991	-8.52137e-05	0.00054849	0.000334576
17	2.5	0.1	10	-0.374691	0.000138515	1.02657e-05	-0.0739211	0.000100521	0.00981175	0.00182625	0.00104585	-0.00148041	0.115379	0.0615653	0.000175458	-0.0132684	0.0578267	0.000102898	0.000567637	-0.00051461	0.264424	-0.000122829	0.000712837	3.99345e-05
17	2.5	0.1	10	-3.21897	-0.000685038	2.37092e-05	-0.0206579	-0.000374922	-0.00796577	0.00151194	0.00107291	-0.00699747	0.324401	0.106135	-0.00166478	-0.025722	0.0784837	-0.000372791	-0.000220752	-0.000882814	0.0140739	-0.000455042	-1.00751e-05	-0.000437461
17	2.5	0.1	10	3.28693	4.82617e-05	0.000148385	-0.0891246	0.000274644	0.00664891	0.00448491	0.00228834	-0.00108589	0.322682	0.161427	-0.000170369	-0.013118	0.0406457	0.000207132	0.000552706	0.000355712	0.127984	0.000171585	0.000553853	-4.39722e-05
17	2.5	0.1	10	-3.22707	-0.000749949	4.20727e-05	-0.0865778	4.92217e-05	0.00499785	0.00372111	0.00147884	-0.00298656	0.341562	0.11011	-0.000931068	-0.0152259	0.0172891	0.000341514	0.000505437	-0.000662657	0.271625	-0.00022879	0.000158833	-0.000227386
17	2.5	0.1	10	-0.147301	-0.000314065	-2.48221e-05	0.167281	-0.000177551	-0.00199816	0.00234801	0.000943525	-0.00404553	0.253535	0.0633532	-0.00119368	-0.0208714	0.0482012	5.02684e-05	0.000436879	-0.00082916	0.281367	-0.000499144	0.000291506	-0.00036134
17	2.5	0.1	10	-3.35798	-0.000729929	-0.000214787	-0.0176904	-0.000650176	-0.0039201	-8.67796e-05	0.000715656	-0.00668114	0.0604416	0.0482064	-0.00151246	-0.0255237	0.0911642	-0.000310418	-0.000136687	-0.00108268	0.0806407	-0.000323597	-4.88451e-05	-0.000364469
17	2.5	0.1	10	-2.39602	-0.000333025	0.000209547	-0.128349	0.000427012	-0.00250306	0.00525434	0.00338195	-0.00211436	0.437419	0.272198	0.000222183	-0.0125272	0.0544935	0.000179256	0.000200107	0.000110662	0.0524158	0.00023487	0.000123006	0.000106316
17	2.5	0.1	10	-0.892895	-0.000356101	-6.17223e-05	0.0233496	-0.000450675	-0.00306514	0.00358649	0.00166261	-0.0037495	0.369166	0.136808	-0.00128231	-0.0218713	0.0532281	-0.000142241	-2.13146e-05	-0.00109529	0.136812	-0.000296837	0.000715331	-0.000389526
17	2.5	0.1	10	0.845873	-0.000252121	-2.96265e-05	-0.0804876	8.37634e-05	0.019674	0.00285852	0.00238674	-0.0012574	0.195292	0.171642	-0.00076431	-0.0169181	0.0383198	0.000259608	0.000793016	0.000676435	0.155952	-0.000125213	7.49794e-05	0.000295584
17	2.5	0.1	10	-0.0142784	-0.000622016	-0.00015713	0.0107616	-0.000298177	0.00715715	0.00299923	0.00124039	-0.00240267	0.247647	0.0832525	-0.0011793	-0.0211324	0.052213	-0.00014036	5.45284e-05	-0.000699306	0.10147	-0.000404984	8.11931e-05	3.42622e-05
17	2.5	0.1	10	-2.33622	-0.000202478	7.41088e-05	-0.0212301	-3.51528e-05	-0.00792133	0.00354196	0.00248328	-0.00551523	0.487794	0.269052	-0.00188649	-0.0253568	0.0474923	-0.000185453	0.000279865	-0.00134324	0.351255	-0.000240227	0.000401709	-0.00075528
17	2.5	0.1	10	-0.774266	0.000138531	1.99574e-05	-0.136453	-3.52883e-05	-0.000439514	0.00219828	0.00189741	-0.00603194	0.351384	0.206874	-0.00197654	-0.027041	0.0693041	-0.000271778	0.000223802	0.000160118	0.0545467	-0.00030214	0.000102637	-0.000339092
17	2.5	0.1	10	-0.861808	-0.00021245	-0.000121524	-0.0764964	-0.000478087	-0.00484122	0.00270594	0.00146169	-0.00308105	0.247474	0.109312	-0.00122233	-0.0215788	0.0542799	-0.000239801	7.28706e-06	-0.00101288	0.134197	-0.000338465	0.000435785	-0.000329361
17	2.5	0.1	10	-3.20082	-0.000555923	3.80233e-05	-0.0243678	-0.000338183	-0.00123549	0.00121074	0.000950373	-0.00382947	0.124124	0.0629793	-0.000509895	-0.018618	0.0693236	-0.000232799	-0.000264616	-0.000604247	-0.0338879	-0.000237879	-7.10887e-05	-0.000174169
17	2.5	0.1	10	0.319663	0.000136073	-0.000122913	-0.0839308	0.000232605	0.0236381	0.00178841	0.00103689	0.000964124	0.0619183	0.0530163	0.00073753	-0.00835141	0.0488034	0.000474679	0.000876511	0.000521767	0.1962	-0.000114524	0.000497127	0.00048617
17	2.5	0.1	10	-3.02211	6.36742e-05	0.000276555	0.0122038	7.14855e-05	0.000218575	0.00424085	0.0036662	-0.00234054	0.358052	0.303311	-0.000464314	-0.0160912	0.0480975	5.54904e-05	0.000402609	3.55351e-05	0.122082	9.01207e-05	0.000274246	-4.5612e-05
17	2.5	0.1	10	3.48627	0.000335515	-9.90474e-05	-0.0913251	8.5477e-05	0.014244	0.00302831	0.00200594	-0.00113789	0.205506	0.138915	-0.000343175	-0.0132691	0.0335982	0.000310243	0.000683246	7.26976e-05	0.202514	-0.000151789	0.000186398	0.000352536
17	2.5	0.1	10	2.92845	0.000723652	0.000308638	-0.0331678	0.000599368	0.00541746	0.00642342	0.00357732	0.00194757	0.34932	0.216708	0.00107511	-0.00692485	0.0530736	0.000664723	0.00137666	0.000585095	0.319373	0.000105053	0.000561477	8.84444e-05
17	2.5	0.1	10	4.96167	-0.000160974	0.000174813	-0.0210417	5.93936e-05	0.000429864	0.000882246	0.000750179	-0.00363369	0.0841245	0.041401	-0.000726492	-0.0166229	0.038074	-0.000102309	0.000194207	-0.000134565	0.0768898	0.000201386	0.000647669	-0.000160694
17	2.5	0.1	10	2.9343	0.000431607	1.20413e-05	-0.134797	0.00118871	0.0227438	0.0024566	0.00136723	-0.000981967	0.154374	0.0856912	8.4149e-05	-0.00836322	0.0240355	0.000308626	0.00043226	0.000940557	0.0418134	2.52717e-05	0.000381672	0.0001557
17	2.5	0.1	10	-0.482473	-0.000272139	-2.88993e-05	-0.0589057	-9.12469e-05	0.00796648	0.00254128	0.00135474	-0.0019021	0.188828	0.0902689	-0.00116862	-0.0230397	0.0788779	-9.38739e-05	0.000437197	-0.000269403	0.175235	-0.000275686	0.00044857	-8.70194e-05
17	2.5	0.1	10	6.43207	-0.000107117	-8.53356e-05	-0.0893196	4.06625e-05	0.0167781	0.00312535	0.00159505	-0.000732793	0.200751	0.102362	-0.000100475	-0.0144216	0.0534604	7.19108e-05	0.000367524	0.000873656	0.0312955	-0.000161194	0.000168583	0.000351119
17	2.5	0.1	10	2.4032	0.00121929	0.000345271	-0.0711482	0.000971211	0.0104217	0.00452765	0.00262701	-4.93951e-05	0.286547	0.175499	0.00047732	-0.0103183	0.0505231	0.000626213	0.00141413	0.000707135	0.310293	-4.00669e-05	0.000526494	-4.06072e-05
17	2.5	0.1	10	2.52687	-0.000290419	-0.00020376	-0.0361191	-0.000372441	-7.10966e-05	0.0091244	0.00522486	-0.000282107	0.646794	0.37723	-0.00157979	-0.0211625	0.0229134	-7.48202e-05	0.000417165	-0.000878446	0.284761	-0.000252908	0.00025892	-0.000248692
17	2.5	0.1	10	-2.80476	-0.000466766	-0.000125193	-0.0810291	0.000190389	0.00590672	0.00474258	0.00305863	-0.00398823	0.50679	0.289113	-0.00144495	-0.02022	0.0239159	0.000104224	0.000635872	-0.00065082	0.319657	-0.000211941	0.000416444	-0.000113172
17	2.5	0.1	10	0.0401598	8.84459e-05	-0.000239518	-0.200636	0.000192789	0.0155878	0.00135185	0.000953545	-0.00358074	0.130776	0.0620868	-0.000709732	-0.0174011	0.0454827	-5.82901e-06	0.000400194	-0.000466552	0.194363	-0.000193334	0.000370586	6.28274e-05
17	2.5	0.1	10	1.31949	0.000100382	2.26998e-05	-0.107254	-0.000148892	-0.000473781	0.00200864	0.0010662	-0.00377733	0.205852	0.0748256	-0.00112768	-0.0202233	0.0459066	-0.000263025	2.86466e-05	-0.000223489	0.0324014	0.000160954	0.000440859	-0.000122555
17	2.5	0.1	10	2.92929	0.00040094	-5.69149e-06	-0.0673429	0.000363172	0.0224917	0.00586001	0.00603125	-0.0010535	0.433228	0.465558	-0.000676615	-0.0149716	0.0286305	0.000264322	0.000539651	0.00062402	0.0961542	-0.000114987	0.000312058	0.000467008
17	2.5	0.1	10	-1.29738	-0.000396117	-0.000167259	0.0837893	-0.000247197	-0.00136668	0.00172772	0.00129124	-0.00432268	0.198164	0.103373	-0.00109852	-0.019982	0.0454165	-4.71823e-05	0.000189324	-0.0011174	0.240867	-0.000498305	0.000173978	-0.000492826
17	2.5	0.1	10	0.351936	0.000247408	0.000149066	0.0155361	6.6233e-05	0.00768908	0.00351311	0.00155817	0.000639157	0.190923	0.0911727	0.000183283	-0.0130674	0.0566762	0.000139616	0.00053662	0.00082473	0.0767584	0.000307044	0.000752398	0.000282832
17	2.5	0.1	10	0.797388	-4.10007e-06	-0.00015074	-0.0477682	0.000104156	0.0255993	0.00275384	0.0011817	-4.29609e-05	0.152969	0.0667665	0.000474795	-0.010507	0.0516312	0.000257263	0.000781026	0.000872674	0.13215	-0.000120806	0.000510724	0.000493804
17	2.5	0.1	10	-1.62422	-0.000784047	-0.00017564	0.0690828	-0.000365517	0.0111893	0.00305527	0.00186467	-0.000190048	0.17963	0.119261	-0.00111452	-0.00856749	-0.0208779	-2.42339e-05	-2.56797e-05	-0.000187757	0.0108702	-0.000260713	6.31502e-05	0.000247442
17	2.5	0.1	10	-1.75691	-0.000643099	-3.0252e-05	0.120407	-0.000471626	0.0106039	0.0049913	0.003526	-0.00122605	0.370305	0.265246	-0.0011285	-0.0226198	0.0758074	-6.91452e-05	0.000222872	-0.000257266	0.101286	-0.000393733	0.000507659	0.000370553
17	2.5	0.1	10	2.14077	-7.43132e-05	-8.71049e-05	-0.063527	-0.000238385	-0.00715685	0.000919246	0.00089616	-0.00643928	0.197632	0.0731891	-0.00174402	-0.0260279	0.0758021	-0.0002583	-9.33843e-05	-0.000948723	0.0784098	-0.000422793	0.000118663	-0.000360288
17	2.5	0.1	10	3.47838	-8.45723e-05	0.000232469	-0.0529795	0.000549666	0.00490416	0.00250762	0.00130541	0.00816019	0.0137185	0.0528459	1.81782e-05	0.000505216	-0.0103179	0.000188968	0.000407957	0.00209719	-0.0327472	0.000747772	0.000315731	0.000555167
17	2.5	0.1	10	3.0866	0.000482016	0.000109546	-0.102029	0.000297967	0.0152536	0.00524119	0.00449209	-0.0021755	0.439633	0.372997	-0.000551016	-0.0155751	0.0394249	0.000179411	0.00036315	4.34998e-05	0.109049	-0.000118508	-2.60649e-06	0.000385771
17	2.5	0.1	10	-3.63411	-0.000744463	-0.000319046	0.0230501	-0.000594261	-0.00542402	0.00172923	0.00185344	-0.00810778	0.473268	0.274457	-0.00213946	-0.0271071	0.0492848	-0.000425796	-0.000221333	-0.00139711	0.0964262	-0.000736317	0.000108728	-0.000526576
17	2.5	0.1	10	3.26108	0.000290911	0.000137005	-0.0315487	1.839e-05	0.0133238	0.00346215	0.00159112	0.00215	0.151265	0.0858902	0.000778692	-0.0102092	0.0621509	0.000325355	0.000857184	0.000747267	0.16431	-4.73078e-05	0.000560323	0.000323371
17	2.5	0.1	10	1.6463	-9.37407e-05	4.08571e-05	0.0451148	-0.000190008	-0.00394231	0.00476984	0.00467705	-0.00380361	0.496318	0.453437	-0.00141183	-0.0216366	0.0404458	-4.38531e-05	0.000363952	-0.00122522	0.355999	-0.000282186	0.000283158	-0.000686053
17	2.5	0.1	10	0.0834335	0.000370633	2.30092e-05	-0.0299456	0.000495878	0.0216533	0.00350344	0.00130738	0.00429387	0.113091	0.061211	0.00202756	-0.00424322	0.070464	0.000460925	0.000880941	0.00113327	0.130397	6.50982e-05	0.00100762	0.000428016
17	2.5	0.1	10	-1.13057	-0.000184294	-7.49444e-05	0.00455097	-5.52268e-05	-0.00437232	0.00283053	0.00140877	-0.00426724	0.317328	0.115781	-0.00124891	-0.0211403	0.0471594	-0.000178923	0.000217392	-0.00111833	0.254386	-0.000346823	0.000450757	-0.000768547
17	2.5	0.1	10	-0.176534	-0.000214409	3.19678e-05	-0.011657	-0.000412167	-0.00527977	0.00125942	0.000986873	-0.00633202	0.240332	0.0852373	-0.00186294	-0.0246467	0.0390532	-0.000258995	0.00017992	-0.000705229	0.152024	-4.68365e-05	0.000362756	-0.000467151
17	2.5	0.1	10	-1.58741	-0.000241557	-0.000103369	-0.0272213	0.000100795	0.00769098	0.00353326	0.00138102	-0.00215302	0.285779	0.0943002	-0.000791084	-0.0143189	0.0187272	0.000228725	0.000508788	-0.000699974	0.281094	-0.000221176	0.000690046	-0.000146807
17	2.5	0.1	10	-3.71169	-0.000740207	-0.000157733	-0.00755314	-0.000749188	-0.00494271	0.000443341	0.000840294	-0.00738386	0.177963	0.0730073	-0.00189242	-0.0276361	0.0959923	-0.00044414	-0.000209959	-0.00119735	0.0649749	-0.000317225	-7.18724e-05	-0.000366519
17	2.5	0.1	10	2.29639	0.00129736	0.000187762	-0.0948788	0.000557937	0.0162799	0.00313378	0.00161797	-0.00029478	0.188549	0.101192	0.000292473	-0.01383	0.0678235	0.000216673	0.000188807	0.000279061	0.0332158	-0.000247915	0.000363058	0.000200981
17	2.5	0.1	10	2.56598	-4.28191e-05	-2.42567e-05	0.0150342	-7.04717e-05	0.000355263	0.00101259	0.000917666	-0.00189518	0.0550902	0.0520495	-0.00100169	-0.0163337	0.020813	0.000143057	0.000416576	-0.000556264	0.216423	-0.000378159	7.56965e-05	-0.000258831
17	2.5	0.1	10	-3.44234	-0.000710019	-0.000118446	-0.040907	-0.000531223	-0.00751822	-0.000377372	0.000681976	-0.00705402	0.0286228	0.0448094	-0.0018772	-0.0267824	0.0761895	-0.000439566	-0.000221333	-0.0016571	0.158736	-0.000509476	0.000459169	-0.000619196
17	2.5	0.1	10	-2.01556	0.000648218	-0.000137459	-0.125352	0.000694975	0.0153462	0.00281109	0.00140962	-0.0031717	0.261638	0.105033	-0.000810973	-0.0165849	0.0331032	0.000240961	0.000980049	-0.000280762	0.361034	-0.000173708	0.000630974	8.64068e-05
17	2.5	0.1	10	-2.28409	-0.000649362	0.000170086	-0.067132	0.000425574	0.0140752	0.00442114	0.00210688	-0.00239859	0.377387	0.162386	-0.000578775	-0.0179091	0.0578499	3.37241e-05	0.00021382	0.00105224	-0.017601	-0.000228723	-3.11916e-05	0.000512165
17	2.5	0.1	10	2.3894	-0.000238942	-0.000367986	-0.0796014	-0.000188553	0.0156449	0.00524654	0.00388211	-0.0031453	0.49927	0.347213	-0.000878938	-0.0188455	0.048506	-4.74897e-05	-8.4709e-05	-0.00107035	0.102643	-0.000454314	0.000206533	6.60878e-05
17	2.5	0.1	10	0.867236	-0.000269018	-0.000188359	-0.0714902	-0.000167847	0.0155905	0.00192024	0.00100931	-0.00186968	0.13366	0.0599543	-0.000155456	-0.0134992	0.0439691	4.87303e-05	0.000465923	1.20697e-05	0.144523	-0.000231384	0.000113893	0.000239436
17	2.5	0.1	10	3.00397	0.000117585	7.89792e-05	0.0296465	0.000141877	0.020208	0.00565949	0.0027264	0.0005917	0.346204	0.175256	-4.27667e-05	-0.012356	0.0413979	0.000431417	0.00137047	0.000131783	0.398426	-6.52934e-06	0.000438893	0.000406683
17	2.5	0.1	10	3.21386	0.000422035	7.86929e-05	-0.0673666	0.000566338	0.0191803	0.00310263	0.00150285	-0.00163658	0.228362	0.101216	-0.000826606	-0.0139027	0.0145413	0.000202372	0.000931599	-4.02549e-05	0.297472	-0.000203697	0.000419695	0.000139959
17	2.5	0.1	10	1.81944	6.76685e-05	-2.69598e-05	-0.0286663	-0.000110061	0.000531798	0.000649987	0.000855883	-0.00317306	0.0492362	0.050606	-0.000925436	-0.0174065	0.0330348	-4.98382e-05	0.000278118	-0.000299802	0.12568	5.12746e-05	0.000541099	-0.000248839
17	2.5	0.1	10	3.36117	0.000238024	7.22243e-05	-0.0435184	-6.6391e-05	0.0113309	0.00107974	0.000946928	0.000167033	0.0238642	0.0485899	0.000557749	-0.010539	0.0552765	0.000213448	0.000798246	0.000284402	0.206134	5.11936e-05	0.000321013	0.000151737
17	2.5	0.1	10	-0.293967	6.76645e-05	-3.18774e-05	0.0685517	7.14227e-05	-0.00117665	0.00482971	0.00552006	-0.00458929	0.564032	0.589047	-0.0014794	-0.023208	0.0544609	-2.36046e-05	0.000256267	-0.00101693	0.247442	-0.000581856	0.00025497	-0.00039632
17	2.5	0.1	10	4.72281	0.000335844	-7.66457e-06	-0.114629	0.000392544	0.0173641	0.00267756	0.00143218	-0.00187644	0.199882	0.096853	0.000118969	-0.0117968	0.0448949	0.00024381	0.000715109	0.000359629	0.172776	-0.000168602	0.000328437	0.000340887
17	2.5	0.1	10	-2.79442	-0.00039754	7.5399e-05	-0.0690716	7.44028e-05	0.00295288	0.00122099	0.00130504	-0.00103339	0.0554163	0.080934	0.000840296	-0.0085506	0.0539092	0.000326887	0.000567443	0.00033922	0.134	0.000243323	0.00071097	0.000152841
17	2.5	0.1	10	1.22637	-0.000102155	-4.87862e-05	0.055085	-0.000215945	0.014567	0.00104847	0.000940349	0.000446261	0.0174266	0.0474366	0.000671906	-0.0107347	0.0613544	0.000225163	0.000799973	0.000472781	0.181839	2.42248e-05	0.000639136	0.000129707
17	2.5	0.1	10	-3.31189	-0.000819488	-0.000114402	0.0348664	-0.000545161	-0.0106994	0.000506154	0.000727659	-0.00629795	0.131396	0.0481144	-0.00139402	-0.0220715	0.0468718	-0.00022357	-6.2696e-05	-0.00112359	0.122775	-0.000152667	0.000539474	-0.000451476
17	2.5	0.1	10	4.04779	0.000543093	-8.33006e-05	-0.0354026	0.000622161	0.0280602	0.00375946	0.00184035	0.00248629	0.162964	0.100132	0.00137346	0.000208039	0.0293448	0.000843764	0.000868964	0.000861454	0.154773	1.96826e-07	0.000681718	0.000281261
17	2.5	0.1	10	0.46066	-1.06584e-05	-2.74924e-06	0.0847528	-8.42187e-05	-0.000404549	0.00472464	0.00448775	-0.00448345	0.543262	0.465697	-0.00141286	-0.0223089	0.0482608	-3.39306e-05	0.000174447	-0.00115074	0.242074	-0.000533503	0.000170888	-0.000469988
17	2.5	0.1	10	-2.5879	-0.000307195	-8.74578e-05	-0.0691582	0.000279335	-0.007685	0.00366679	0.00206334	-0.00455393	0.428743	0.193522	-0.00155732	-0.0173489	-0.0039039	-6.76459e-05	0.000171166	-0.000799581	0.165216	-0.000101479	0.000670161	-0.00018274
17	2.5	0.1	10	-0.363509	-0.00051399	-0.000179741	-0.0748313	-0.000353716	0.000137503	0.00608956	0.00619387	-0.00280296	0.557113	0.555724	-0.00117643	-0.0220298	0.063586	-0.000176712	-0.000215085	-0.00085854	0.0134474	-0.000598467	0.000117596	-0.000188283
17	2.5	0.1	10	3.3527	0.000353672	0.000151582	-0.0238756	0.000217385	0.00685812	0.00408898	0.00164452	-0.000112631	0.255635	0.102015	-5.46534e-05	-0.0137065	0.0502486	0.000249937	0.000736838	0.000514692	0.159806	0.000229692	0.000431066	0.000309767
17	2.5	0.1	10	-0.857271	-0.00024607	-0.000161146	0.0157334	-0.000401692	0.00078022	-0.000518361	0.000758703	-0.00465735	-0.0457311	0.0454704	-0.00113158	-0.0219327	0.0658242	-0.000118557	0.000339566	-0.000861241	0.247901	-0.000463155	0.000273124	-0.000361003
17	2.5	0.1	10	1.05609	-0.000505489	-0.000196892	0.017317	-0.000252503	-0.0077421	0.000194142	0.000743702	-0.00413926	0.023995	0.0421368	-0.00079484	-0.0155305	0.0263496	3.57556e-06	0.000346102	-0.00108596	0.306334	-0.000135785	0.000619079	-0.000351019
17	2.5	0.1	10	-0.848288	-0.000175474	-0.000160531	-0.091043	-2.07536e-06	0.0192029	0.00139755	0.00101338	-0.00385195	0.144527	0.06973	-0.000697808	-0.0177793	0.0495532	-3.14961e-05	0.000248006	-0.000789774	0.194909	-0.000316547	0.00037688	5.16856e-05
17	2.5	0.1	10	2.7113	0.000215774	-2.59639e-06	-0.111333	0.000478797	-0.00110481	0.00366957	0.00155564	-0.00341774	0.359113	0.121968	-0.00111241	-0.0200338	0.0449994	-4.93757e-05	0.000104172	-0.000370852	0.0749444	1.44034e-05	0.000387699	-5.97734e-05
17	2.5	0.1	10	2.97284	0.00103963	0.000429595	-0.112868	0.00104849	0.0348784	0.0091939	0.00930185	0.0034236	0.467765	0.540357	0.000311992	-0.0136137	0.0669778	0.000713352	0.000611386	0.00282512	-0.0289486	-0.000158736	0.000282693	0.000529475
17	2.5	0.1	10	3.04707	-9.84536e-05	-6.70812e-05	-0.0398462	0.000104912	0.0168894	0.00619496	0.00490419	-0.00063469	0.439306	0.362044	-0.000250847	-0.0117954	0.028719	0.000281859	0.000353845	-0.000229662	0.14142	-0.000157979	0.000108291	0.000138811
17	2.5	0.1	10	-3.45311	-0.000741405	-0.000199371	0.0899936	-0.000606039	0.00171032	0.000511379	0.000897408	-0.00342057	0.0410383	0.0556735	-0.00102726	-0.0218901	0.0734181	-9.1961e-05	0.000220263	-0.000852759	0.195837	-0.000345099	0.000185651	-0.000382115
17	2.5	0.1	10	-1.2128	-0.000335466	-8.21632e-05	-0.0330386	-5.43022e-05	0.0125151	0.0020458	0.00113272	-0.00239379	0.160237	0.0733659	0.00025748	-0.0134039	0.0627194	0.000122083	0.000365994	-0.000105034	0.128478	-0.000163667	0.00029223	0.000317129
17	2.5	0.1	10	3.34711	0.000214181	0.000123529	-0.0164884	9.76572e-05	0.0163737	0.00287467	0.00300778	0.0024085	0.108502	0.174658	0.000758564	-0.0113156	0.0691977	0.000445393	0.00117286	0.000720725	0.247194	3.65416e-05	0.000747753	0.000340062
17	2.5	0.1	10	-3.03343	-0.000503006	-7.47723e-05	-0.144397	-0.000137757	-0.00362877	0.0017092	0.00108679	-0.00512437	0.232992	0.0871019	-0.00167683	-0.0243358	0.0527359	-0.00036283	1.94717e-05	-0.000841308	0.109507	-7.52103e-05	0.000344648	-0.000281885
17	2.5	0.1	10	3.05509	-5.91845e-05	0.000268608	0.0116228	-8.86973e-05	0.0110196	0.00876977	0.00604344	0.00111404	0.542232	0.398886	-0.00108975	-0.0195926	0.0421191	8.42088e-05	0.000820259	0.000137419	0.233913	-0.000195734	0.000304871	0.000233074
17	2.5	0.1	10	-0.27467	-7.5585e-05	-5.93174e-05	-0.117323	0.000218883	-0.00265682	0.00249429	0.00110048	-0.00425229	0.279528	0.0817105	-0.000955499	-0.0202448	0.0580678	-5.53146e-05	9.5299e-05	-7.74392e-05	0.0390421	0.000105549	0.000766384	6.46739e-05
17	2.5	0.1	10	-2.24333	-0.00024703	5.64904e-05	0.0422154	1.81975e-05	-0.00736984	-0.000400368	0.000670017	-0.00465782	-0.0321411	0.035263	-0.000711513	-0.0180559	0.051298	-1.00304e-05	0.000284797	-0.00103946	0.265893	-0.000418278	0.000746868	-0.000749783
17	2.5	0.1	10	-4.45437	-0.000918455	-0.000178058	0.221273	-0.000462623	-5.30832e-05	-2.61275e-05	0.000744303	-0.00359915	-0.0100269	0.0407052	-0.0011617	-0.0211814	0.0540885	0.00024709	0.000692063	-0.00124123	0.526078	-0.000566891	0.000387371	-0.000362525
17	2.5	0.1	10	-0.443664	3.0365e-05	5.80493e-05	-0.0290713	-0.000115697	-0.000394333	0.000831337	0.00121086	-0.00336508	0.0718585	0.0868574	-6.27941e-05	-0.0112481	0.0336284	1.11352e-05	0.000162597	-0.00010898	0.0638325	5.82654e-05	0.000854886	-0.000178273
17	2.5	0.1	10	-3.53233	-0.000601788	-7.95743e-05	-0.0517827	-0.000475814	-0.00321547	0.0030621	0.00297595	-0.00570302	0.441461	0.339761	-0.00188144	-0.0266564	0.0728148	-0.000436791	-0.000258236	-0.00111152	0.028191	-0.000464073	-9.7541e-06	-0.000495554
17	2.5	0.1	10	2.90456	0.000385811	0.000161738	-0.0599894	0.000197299	0.00577997	0.00567934	0.00530058	-0.00214285	0.476934	0.444128	-0.00077534	-0.0182598	0.0493477	0.000206356	0.000493285	-9.67402e-05	0.168017	0.0001032	0.000394142	5.74704e-05
17	2.5	0.1	10	0.981267	-0.00022954	7.47509e-05	-0.0322812	-0.000113682	0.00559159	0.00195335	0.00139044	-0.00211076	0.143383	0.0948411	-0.000472361	-0.0164568	0.0507241	5.81498e-05	0.000606396	0.000405284	0.137181	0.000142267	0.000649346	3.08935e-05
17	2.5	0.1	10	2.93083	0.000184948	-1.14485e-05	0.0741547	6.58773e-05	0.0216605	0.00110983	0.00107827	0.00442566	-0.023794	0.0479774	0.00238528	-0.00218707	0.0703837	0.000609013	0.00129103	0.00129491	0.20634	0.000103072	0.000571211	0.00046827
17	2.5	0.1	10	-3.28351	-0.000721402	-7.20425e-05	0.00854248	-0.000719845	-0.00242466	0.000300434	0.00080588	-0.00433292	0.0402178	0.0496153	-0.000670382	-0.0207065	0.0838713	-0.000336293	-0.000299932	-0.00097169	-0.00938673	-0.0003845	0.000213531	-0.00039671
17	2.5	0.1	10	1.64117	-1.44718e-05	-0.000166867	-0.0296681	-0.00013806	0.00340267	0.00279102	0.00124275	-0.00243021	0.229655	0.0836406	-0.000748265	-0.0199593	0.0689944	2.55066e-05	0.000453309	-0.000708682	0.261033	-0.000319408	0.000597141	-0.000195361
17	2.5	0.1	10	2.64408	-2.70056e-05	0.000169832	-0.0424267	0.000274688	0.0039816	0.00371708	0.00194384	-0.00305947	0.344882	0.155992	-0.00118296	-0.0220485	0.0633193	-0.000194648	-0.000104418	-0.000411433	0.00606615	-0.000386307	0.000339246	-0.000219717
17	2.5	0.1	10	-2.93891	-0.000620321	0.000223135	-0.00182963	0.000339288	-0.00107365	0.00590492	0.00341178	-0.00310462	0.560857	0.299964	-0.000826621	-0.0188935	0.0522879	0.000219654	0.000330182	9.98775e-06	0.102905	-4.99615e-05	0.000154779	-5.75588e-05
17	2.5	0.1	10	2.59887	0.000139292	-1.41433e-05	-0.0380935	-3.23628e-05	0.00294139	0.00203202	0.00120274	-0.00351233	0.197776	0.0871051	-0.00101009	-0.0194586	0.0460622	3.46014e-05	0.000574189	-5.71309e-05	0.187912	0.000166421	0.00038888	0.000222912
17	2.5	0.1	10	-1.15856	-0.000197487	0.000169246	-0.0146873	0.00018997	-0.00138785	0.00160106	0.00112796	-0.00426812	0.181924	0.0848534	-0.000637001	-0.0180275	0.0555084	-7.85452e-07	0.000178765	-0.000947883	0.197512	-0.000369254	0.000606297	-0.000598299
17	2.5	0.1	10	-3.15831	-0.000654282	7.39299e-05	0.0948575	-0.000583763	0.00605248	0.00282987	0.00135309	-0.00189591	0.213834	0.0900838	-0.000751534	-0.0203463	0.0734607	-0.000159666	-8.38913e-05	-7.52107e-05	-0.0179769	-0.000260191	-7.31115e-05	-3.39603e-05
17	2.5	0.1	10	0.506767	0.00031477	1.80966e-05	-0.0634929	-0.000151338	-0.00113003	0.000324169	0.000855338	-0.00460914	0.0499637	0.0563655	-0.000881603	-0.0197575	0.0577015	-0.000181575	0.00012984	-0.000460831	0.095764	1.82527e-05	0.000481734	-0.00018529
17	2.5	0.1	10	0.273601	-0.000224124	-0.000263822	-0.0741654	-0.000371343	-0.00353387	3.07812e-06	0.000866281	-0.00525985	0.0289238	0.0610328	-0.00131071	-0.0240183	0.0824117	-0.000277207	-1.32905e-07	-0.00101042	0.130394	-0.000455668	9.95278e-05	-0.000412824
17	2.5	0.1	10	2.71148	0.000274486	5.01048e-05	-0.0464833	-7.59032e-05	-0.00325743	0.00136182	0.00132382	-0.00388216	0.141795	0.102711	-0.00104501	-0.0194531	0.0437125	-3.39809e-05	0.000481016	-0.000619048	0.253051	-0.000104215	0.000237031	-0.000461541
17	2.5	0.1	10	0.230647	9.48766e-05	-4.22532e-06	0.152419	0.000108256	0.00418494	0.000884215	0.00097425	-0.0018321	0.0426397	0.0567625	-0.000405775	-0.0170538	0.0597743	0.000468109	0.000901707	-0.000960641	0.518717	-0.000306462	0.00120701	0.00031132
17	2.5	0.1	10	3.57935	6.11208e-05	0.000178193	-0.0812116	0.000330016	0.00115697	0.00195226	0.000959272	-0.00281478	0.165039	0.0592196	-0.000490285	-0.0171099	0.0554871	7.50405e-05	0.00029883	0.000274556	0.0650104	7.09026e-05	0.000231244	0.000100437
17	2.5	0.1	10	1.86248	8.39161e-05	-0.00012456	0.0546168	-0.000211924	0.00219271	0.00277173	0.0015103	0.000321667	0.145339	0.0894348	-0.00126702	-0.00781953	-0.0288946	5.9271e-05	0.000348621	-0.000850779	0.249382	-0.000383523	0.000490656	-0.00034024
17	2.5	0.1	10	-0.125721	0.000131552	0.000206693	-0.0478316	0.00029259	0.00563748	0.00242031	0.00202731	-0.00207205	0.183689	0.151063	0.000104254	-0.0151217	0.0696002	8.43418e-05	0.000291607	0.000741342	0.0225717	0.000185066	0.000631337	0.000456557
17	2.5	0.1	10	-3.25292	-0.00062391	2.02769e-05	0.00256816	-0.000179466	-0.0020485	0.00135601	0.000880478	-0.00275198	0.106692	0.0515201	-0.000758477	-0.0184585	0.052277	-1.51206e-06	0.00041303	-0.000317178	0.174415	-2.98228e-05	0.000216721	-4.80482e-05
17	2.5	0.1	10	2.94867	0.000394144	6.604e-05	-0.0805703	0.000207808	-0.000177566	0.00383398	0.00254294	-0.00241831	0.324659	0.20256	-0.000785877	-0.0180844	0.0470826	6.61249e-05	0.000229686	-0.000326082	0.112681	-9.91871e-06	0.000391508	-0.000235484
17	2.5	0.1	10	2.25372	-0.000123782	0.000134979	0.0159096	4.12539e-05	0.000644803	0.00266234	0.00132402	-0.00302749	0.241018	0.0954799	-0.000698472	-0.0200752	0.0737858	8.98441e-05	0.000230408	-0.000457265	0.131546	-0.000434262	0.000249691	-0.000235586
17	2.5	0.1	10	1.214	0.000457296	0.00018948	-0.00286033	0.000498781	0.00244316	0.00435446	0.00242247	-0.00237573	0.370142	0.19085	-0.00047647	-0.016763	0.0531538	0.000149698	0.000415427	-0.000509617	0.20748	-0.000295239	0.000199202	-0.000363362
17	2.5	0.1	10	-2.41865	-0.0004288	-0.000207909	-0.0265647	-0.000538953	-0.000721043	0.00199417	0.00149585	-0.00607974	0.326799	0.152864	-0.00178867	-0.0267173	0.0858409	-0.000419298	-0.000217295	-0.00137562	0.0942354	-0.000510413	0.000230756	-0.000490523
17	2.5	0.1	10	2.73404	0.000444612	1.48102e-05	-0.0220049	-0.000148208	-0.000809397	0.00370145	0.00200505	-0.00374111	0.380656	0.172359	-0.000503232	-0.0156833	0.0427633	-0.000100325	-6.49132e-05	-0.000717863	0.0567532	2.04306e-05	0.000110857	-0.000257875
17	2.5	0.1	10	1.33189	0.000252142	2.30534e-05	-0.0505522	0.000108768	0.0055823	0.0025562	0.00176921	-0.00348906	0.250064	0.144411	-0.000279725	-0.0166123	0.0627311	9.40118e-05	0.000437522	0.000352871	0.0961623	-0.000142085	-7.82747e-05	0.000193753
17	2.5	0.1	10	0.65096	-0.000154954	-6.50351e-05	0.0467926	-0.000434962	0.00667097	0.00270124	0.00180454	-0.00475135	0.330416	0.167504	-0.00181157	-0.0268991	0.0873527	-0.000384755	-8.59988e-05	-0.00084041	0.0652291	-0.000400006	4.54381e-05	-0.000333649
17	2.5	0.1	10	2.60219	9.12358e-05	9.41171e-05	-0.0409297	-4.64326e-05	-0.00431326	0.00463458	0.00416237	-0.00279898	0.418867	0.362885	-0.00093474	-0.019213	0.0485396	1.01129e-05	0.000253477	-0.000421961	0.134579	-4.55248e-05	0.00052709	-0.000332543
17	2.5	0.1	10	-3.19407	-0.000627457	-0.000250239	0.0380203	-0.000217283	0.00475506	0.0020979	0.00126995	-0.00199557	0.152816	0.0834157	0.000109642	-0.0114259	0.0421055	0.00024939	0.000470092	-0.000869243	0.304974	-0.000276111	0.000445092	-0.000201287
17	2.5	0.1	10	0.759551	0.000260539	0.000369442	-0.0285573	0.000226864	0.00424049	0.00519728	0.00294808	-0.00201831	0.427128	0.231712	-0.000887337	-0.0215065	0.078854	-3.67014e-05	-7.90557e-06	-0.000314666	0.0296531	-0.000400731	0.000183794	-7.97893e-05
17	2.5	0.1	10	3.21526	0.000231185	2.22356e-05	-0.0814945	0.000144292	0.00857252	0.00193877	0.00110075	-0.00176994	0.132541	0.0674682	-0.000253315	-0.0141299	0.0437718	1.2471e-05	0.000492527	-0.00016307	0.177471	-0.000290838	0.000467782	0.000133159
17	2.5	0.1	10	-3.18751	-0.000539705	0.000151427	0.0532122	-0.000231531	-0.00762453	0.00169063	0.00104085	-0.00536804	0.243344	0.0835389	-0.00113732	-0.0213938	0.0584669	-0.000156712	8.43349e-05	-0.00100943	0.168245	-0.000222276	0.000337285	-0.000631277
17	2.5	0.1	10	2.47994	8.34119e-05	-0.000275371	-0.051768	-3.22573e-05	0.0050331	0.00380414	0.00214408	-0.0032625	0.364128	0.178688	-0.00102335	-0.0180781	0.0327121	0.000122356	0.000363284	-0.00123553	0.358954	-0.000296283	0.000131243	-0.000244598
17	2.5	0.1	10	-2.21953	-0.000226783	-1.55915e-05	-0.0274523	1.66728e-05	0.000786493	0.00361307	0.00192299	-0.0025899	0.312204	0.147907	-0.000637862	-0.0176532	0.0519321	0.000125127	0.000746654	-4.43587e-05	0.240167	9.9149e-06	0.000342148	4.89272e-05
17	2.5	0.1	10	-0.0155409	-0.000194982	0.000253911	0.165085	0.000192892	0.00206131	0.00432237	0.00245834	-0.00217502	0.357346	0.190905	-0.000408961	-0.0188654	0.0784353	0.000422948	0.000742964	-0.000656702	0.36264	-0.000149941	0.00116909	0.000449788
17	2.5	0.1	10	2.74148	1.84556e-05	-0.000220024	-0.0774749	-8.35825e-05	0.00989407	0.00305187	0.00194559	-0.00367972	0.309873	0.165209	-0.000663849	-0.0175837	0.049774	6.5388e-05	0.000668347	-0.000501527	0.298717	-0.000374319	0.0003314	0.000129041
17	2.5	0.1	10	1.29986	-0.000245449	-0.000132895	0.0429347	-0.000632419	0.000437449	0.00240003	0.00283416	-0.00583175	0.364023	0.32645	-0.00180508	-0.0266562	0.0823396	-0.000417044	-2.49092e-05	-0.00101862	0.120717	-0.000426523	2.41054e-05	-0.000336523
17	2.5	0.1	10	2.34811	5.26823e-05	-0.000127953	-0.0670665	-0.000405751	-0.00374574	0.000323147	0.000799581	-0.00626546	0.104106	0.0581226	-0.00130151	-0.0231803	0.0695597	-0.000243542	5.66082e-05	-0.000897603	0.134841	-0.000357692	0.000235918	-0.000296754
17	2.5	0.1	10	2.79138	3.71831e-06	4.8646e-05	-0.00175782	-0.000154283	0.0113817	0.00626858	0.00642701	0.000969306	0.37482	0.429562	7.70948e-05	-0.0164958	0.0812909	0.000135743	0.000367035	0.000410688	0.0708205	-0.000127963	0.000415543	0.000227104
17	2.5	0.1	10	-0.171617	5.94588e-06	-3.78712e-05	-0.0378502	-8.83701e-05	-0.00144019	0.00231627	0.00119007	-0.00436629	0.265562	0.0925332	-0.0014863	-0.0229254	0.0500422	-0.000227384	0.000180741	-0.00116609	0.24901	-0.000333609	0.000356536	-0.000766319
17	2.5	0.1	10	-0.04376	-0.000165971	-3.71018e-05	-0.0883889	-0.000300123	-0.00910289	0.00174542	0.00180254	-0.00747513	0.405392	0.23784	-0.0020799	-0.0274099	0.0639131	-0.000371832	-0.000236459	-0.00189278	0.224838	-0.000598323	4.28747e-05	-0.00091332
17	2.5	0.1	10	1.63918	-0.000861531	-0.000242979	-0.0548569	-0.000456544	0.000723404	-0.000295368	0.000635906	-0.00701861	0.0404059	0.0373612	-0.00171321	-0.0249593	0.0591021	-0.000413411	-0.000261888	-0.00115376	0.0327141	-0.000637437	6.48281e-05	-0.000377026
17	2.5	0.1	10	-2.72362	-2.53955e-05	0.000103958	-0.0486229	-0.000124165	-0.00190605	0.00273435	0.00250449	-0.00459667	0.32514	0.244821	-0.00103928	-0.0206528	0.0568307	-0.000123456	0.000197328	-0.000465093	0.12075	1.54492e-05	0.000616163	-0.000180855
17	2.5	0.1	10	2.07295	4.84925e-05	-0.000133748	0.00723484	0.00021859	0.0126619	0.00464805	0.00254991	-0.000341917	0.306348	0.173176	0.000348365	-0.00853516	0.0349927	0.000594422	0.00099575	-0.000225689	0.354499	-0.000245207	0.000268363	-5.07856e-05
17	2.5	0.1	10	2.61082	0.000424025	0.000269981	-0.0458329	0.000638523	0.0205743	0.00517784	0.00205913	0.000233635	0.324663	0.130336	-2.26968e-05	-0.0132647	0.0485412	0.000381385	0.000811233	0.000645041	0.164189	-0.000180236	0.000643893	0.000273195
17	2.5	0.1	10	1.33931	-1.8186e-05	0.000471898	-0.0984002	-0.000226855	-0.00418762	0.00309171	0.00377434	-0.00660734	0.529548	0.501826	-0.00185716	-0.026847	0.0802463	-0.000304439	-8.49715e-05	-0.000907318	0.0756322	-0.000521167	0.000217703	-0.000313888
17	2.5	0.1	10	2.09371	-0.000112954	-0.000106216	-0.00116194	-0.000176476	-0.000120724	0.00462122	0.00266014	-0.00282777	0.419242	0.220999	-0.00118228	-0.0226924	0.0724116	-5.67154e-06	0.000105718	-0.000929707	0.161984	-0.000481684	0.000157856	-0.000253259
17	2.5	0.1	10	7.40464	0.000479601	0.000160505	-0.0979205	0.000673585	0.00286637	0.00196613	0.000950941	-0.00214063	0.145391	0.0558268	-0.000194091	-0.0136142	0.0429464	0.000318763	0.000833665	6.72132e-05	0.248933	5.05389e-05	0.000467684	0.000128022
17	2.5	0.1	10	0.36597	8.00356e-07	-6.47353e-05	-0.0280552	-0.000122484	0.00470748	0.00146373	0.00153116	-0.000865019	0.0716633	0.0981659	0.000243677	-0.0136122	0.0637213	0.000276191	0.00103478	0.000288488	0.272787	8.72237e-05	0.00073955	2.15246e-05
17	2.5	0.1	10	1.67445	0.000524635	0.000144636	0.0258246	0.000486958	0.00383839	0.00594458	0.00621698	-0.00158069	0.46799	0.501528	-0.000570612	-0.0190219	0.069937	5.55928e-05	0.000188377	-0.000295385	0.0944922	-0.000200165	0.000448109	-0.000235385
17	2.5	0.1	10	2.74305	0.000344516	0.000383989	-0.0331797	0.000663148	0.023677	0.00593671	0.00207877	0.00274012	0.292879	0.113614	0.000475421	-0.00985005	0.0475167	0.000524013	0.00094412	0.000898995	0.169015	-8.77501e-05	0.000826323	0.000497201
17	2.5	0.1	10	1.14637	0.000386318	0.000196527	-0.00121204	0.000449488	0.00464071	0.00510875	0.00262561	-0.00159464	0.397628	0.196462	-0.00052056	-0.0172386	0.0549337	0.000233596	0.000393021	-0.000377053	0.176951	-0.000358066	0.000156642	-0.000343565
17	2.5	0.1	10	-3.24529	-0.000861925	-0.00029202	0.0835127	-0.000643684	0.000846619	0.00107571	0.00088264	-0.00413286	0.11955	0.0572005	-0.00100667	-0.0214851	0.0695059	-0.000226087	-0.000158171	-0.00104495	0.0645723	-0.000479829	6.06507e-06	-8.83354e-05
17	2.5	0.1	10	0.859566	-0.000339981	-0.000156838	0.0575393	-0.000479631	0.00542678	0.00351386	0.00215328	-0.00147281	0.257339	0.154816	9.77817e-05	-0.016958	0.0873139	7.9672e-05	0.000113808	-0.000441425	0.0873967	-0.000279498	0.000921737	-0.000141092
17	2.5	0.1	10	-0.0796501	-0.000202253	4.14933e-05	0.0464879	-9.48581e-05	0.00593194	0.00472143	0.00459807	-0.00307562	0.443513	0.414679	-0.00068027	-0.019837	0.0721454	0.000211723	0.000428238	-0.00088799	0.291792	-0.000517597	0.00028001	7.478e-05
17	2.5	0.1	10	2.48858	0.000316353	6.74046e-05	-0.0144905	2.59022e-05	0.0150482	0.00381618	0.00215008	8.6183e-05	0.228844	0.138371	0.000677695	-0.0112643	0.0653614	0.000216855	0.000430966	0.000553339	0.0744674	-0.000182635	0.000228187	0.000135437
17	2.5	0.1	10	-0.685956	-5.15557e-05	-8.27196e-05	-0.04684	-0.000151437	-0.000410877	0.00111511	0.000868834	-0.00293562	0.088644	0.0510424	-0.000716745	-0.0187774	0.0580542	3.90787e-05	0.000336064	-4.63697e-05	0.111541	4.19578e-05	0.000652805	-9.93967e-05
17	2.5	0.1	10	2.38871	-0.000130207	-4.83242e-05	0.0323641	-7.24179e-05	0.0194236	0.00318962	0.0014114	0.000636424	0.167858	0.0806895	0.000350528	-0.011957	0.0561458	0.000448233	0.000690464	-0.000125748	0.23572	-0.000311131	0.000581999	0.000411433
17	2.5	0.1	10	-3.17578	-0.000642071	-6.90716e-06	0.0338589	-0.000470653	-0.00819136	0.00113083	0.00106267	-0.00634136	0.222534	0.0961531	-0.00181246	-0.0251198	0.0514639	-0.000383492	-0.000212267	-0.00105755	0.0416766	-0.000127467	-0.000159095	-0.000474824
17	2.5	0.1	10	-3.28736	-0.00060306	-5.20384e-05	-0.0561717	-0.000208912	-0.00125699	0.000281801	0.000901879	-0.00315382	0.0126709	0.0550525	-0.000779921	-0.0219425	0.0935848	-0.000191987	-0.000150352	-0.000510862	-0.00034311	-0.000335896	-0.000200046	-0.000236984
17	2.5	0.1	10	-2.99375	-0.000615713	-3.28845e-05	-0.0776761	-0.000203203	-0.00805689	0.0024475	0.00143803	-0.00570531	0.361198	0.138547	-0.00151445	-0.0223936	0.0410427	-0.000250412	-0.000179811	-0.000829354	0.0245643	-0.000116784	0.000143993	-0.000386165
17	2.5	0.1	10	1.70632	-2.48023e-05	1.1664e-05	-0.0848876	-0.000303347	-0.00016702	0.00394192	0.00378917	-0.00420668	0.43564	0.375606	-0.00127841	-0.0242838	0.0903065	-0.000205109	-8.21447e-05	-0.000237899	-0.00311494	-0.000367948	9.0157e-05	-0.000191508
17	2.5	0.1	10	2.43621	0.000143508	7.05406e-05	-0.000759752	1.2657e-05	0.00308831	0.00397006	0.00250512	-0.00148496	0.296255	0.184626	-0.000304388	-0.016899	0.0640463	0.000113699	0.000457759	-0.000382765	0.200603	-0.000150119	0.000522401	-0.000389055
17	2.5	0.1	10	-0.103577	-0.000443929	-0.000168782	0.0244506	-7.52375e-05	0.0121176	0.00255828	0.00108814	-0.00121846	0.16932	0.0640512	-0.000333423	-0.0134484	0.0352265	0.000273598	0.00062739	-0.000304978	0.245793	-0.000297439	0.000382879	-0.000193364
17	2.5	0.1	10	2.49375	0.000740877	0.000183443	-0.0585364	0.000440314	0.0130394	0.00639008	0.00711475	0.000506553	0.402196	0.493058	-4.65231e-05	-0.0164133	0.0736793	0.000481691	0.000973784	0.00028885	0.255398	-0.000255253	0.000389556	0.000103864
17	2.5	0.1	10	2.9402	2.94432e-05	-0.000111389	0.0271715	0.000115587	0.0222265	0.00542785	0.00229414	0.00332093	0.245793	0.123107	0.000768641	-0.00984955	0.0593272	0.000472477	0.00105443	0.000450036	0.253837	-0.000346266	0.000622806	0.000710427
17	2.5	0.1	10	0.355764	0.000219298	6.16218e-05	0.080287	0.000105794	0.00290088	0.00149477	0.00109841	-0.00304068	0.128249	0.0736878	-0.000707319	-0.0214301	0.0913912	0.000133833	0.000617827	-0.00039271	0.258698	-0.000128641	0.00117212	3.15274e-05
17	2.5	0.1	10	1.07049	0.00034476	7.46697e-05	-0.00125057	0.000328476	0.00101464	0.00309031	0.00164775	-0.00229054	0.251528	0.119413	-0.000659475	-0.018644	0.0602718	4.20666e-05	0.000514789	-0.000612171	0.264549	-0.000267653	0.000363738	-0.000607283
17	2.5	0.1	10	-3.41859	-0.000668346	-6.10698e-05	0.0564573	-0.000620845	-0.000347903	0.00249256	0.001985	-0.00500546	0.32101	0.193783	-0.00157948	-0.0249758	0.0731762	-0.000397732	-0.000325235	-0.00106016	-0.00998991	-0.000386554	8.95273e-05	-0.000226804
17	2.5	0.1	10	0.190184	-2.53e-06	-0.000131566	0.0492234	2.53859e-05	0.00543272	0.00489486	0.00385964	-0.00124524	0.36321	0.293217	-0.000263391	-0.0191819	0.0915781	6.91173e-05	0.000209741	-0.000323861	0.105518	-0.00029077	0.000724754	-7.33994e-05
17	2.5	0.1	10	2.03216	-0.000188899	-0.000100804	0.00275157	0.000187537	0.0177469	0.00335519	0.00121843	0.00134198	0.162321	0.0644044	0.000181598	-0.00902601	0.031165	0.000415907	0.000887999	2.65059e-06	0.276314	-0.000219416	0.000578406	-3.78995e-05
17	2.5	0.1	10	2.74649	0.000208893	2.29516e-05	-0.0332096	6.1261e-05	0.0119012	0.00248963	0.00141114	0.000286358	0.125492	0.0823524	0.00098166	-0.00958937	0.0661181	0.000233193	0.000578214	0.000424098	0.127318	-0.000224223	0.000364518	7.39214e-05
17	2.5	0.1	10	-3.00541	-0.000319241	-0.000242011	-0.0591653	-0.000564833	-0.00322107	0.000578106	0.00167214	-0.00654551	0.153391	0.188221	-0.00128323	-0.0236112	0.0780061	-0.000374538	-0.000109938	-0.00149455	0.181767	-0.000494925	0.000168559	-0.000540491
17	2.5	0.1	10	-3.22712	-0.000824768	-0.000194479	-0.0524364	-0.000238331	0.00461657	0.00348765	0.00210679	-0.00493844	0.435372	0.206848	-0.00119125	-0.0215037	0.0557333	-9.06533e-05	0.000380966	-0.000696803	0.229939	-0.000562282	7.84562e-05	0.000143018
17	2.5	0.1	10	0.352986	-0.000324809	-9.92837e-05	0.166533	-0.000531623	0.0108873	0.0024453	0.00135071	-0.000530954	0.14165	0.0819202	0.000642674	-0.0130951	0.0781756	0.000145719	0.000482815	0.000117357	0.136198	-0.00028431	0.000433957	6.01186e-05
17	2.5	0.1	10	1.31043	-0.000351388	-0.000240973	0.0452145	-0.000318238	0.00332398	0.00273015	0.00119278	-0.00316062	0.253207	0.0836434	-0.0010583	-0.0172674	0.0242984	0.000114477	0.000644229	-0.000842267	0.371278	-0.000380251	0.000144225	-0.000290887
17	2.5	0.1	10	0.0181925	2.08512e-05	-1.22453e-05	0.0184452	-0.0001101	0.00303829	0.000679986	0.000837593	-0.00132332	0.0161409	0.0436354	3.66988e-05	-0.0156355	0.0707588	0.000233498	0.000561318	0.00031596	0.134992	6.14446e-05	0.000633961	-1.6634e-05
17	2.5	0.1	10	1.79649	-0.000145196	-0.000156114	-0.0461181	-0.000548655	-0.000702583	0.00258499	0.00231041	-0.00506231	0.335623	0.234298	-0.00145107	-0.0251743	0.0904194	-0.0002773	0.00019347	-0.000942565	0.202829	-0.000445918	7.58231e-05	-0.000314418
17	2.5	0.1	10	0.0207956	-5.43446e-05	0.000166347	0.0411569	-3.14861e-05	-0.000668696	0.00227868	0.00112237	-0.00305801	0.204978	0.0761154	-0.000815253	-0.0191697	0.0558201	-3.78791e-05	0.000261402	-0.00065111	0.174538	-0.000354522	0.000446366	-0.000624107
17	2.5	0.1	10	1.57489	-9.65546e-05	0.000222161	0.0757289	-6.98733e-05	0.00726174	0.00442268	0.00239318	0.000407672	0.263339	0.153168	-9.92276e-05	-0.0105954	0.0283624	0.000241123	0.000421356	0.000347505	0.0922092	8.60408e-05	0.000503803	6.38361e-05
17	2.5	0.1	10	-3.42774	-0.000627744	3.60475e-05	0.0125112	-0.000425921	-0.00757072	0.00127337	0.000926965	-0.00584812	0.214928	0.0727247	-0.00176574	-0.0250082	0.0544953	-0.00037112	-0.000216476	-0.000931423	0.0221648	-0.000173193	-0.000217286	-0.000471839
17	2.5	0.1	10	2.43018	0.000545919	0.000625912	-0.128522	0.00104472	0.0216776	0.00552301	0.00404136	-0.00131851	0.418764	0.31002	-0.000385446	-0.0158471	0.0503052	0.00020474	0.000358123	0.00058964	0.0520245	-0.000245791	0.000308236	0.000336896
17	2.5	0.1	10	2.27142	-0.000365132	-0.000261679	0.113081	-0.000466471	0.0125282	0.00631269	0.00237112	0.00465456	0.263251	0.119388	-0.000356412	-0.0166499	0.058825	6.18957e-05	0.000645767	-0.000202395	0.234029	-0.000413606	0.000482088	0.000396999
17	2.5	0.1	10	1.74408	-0.000380012	-0.000110058	-0.0312717	-0.000399394	-0.00422417	0.000996777	0.000944283	-0.00518457	0.148751	0.0701687	-0.00125183	-0.0221027	0.0585633	-0.00025798	-5.62356e-05	-0.00063956	0.0499064	-0.000104474	0.000161969	-0.000369284
17	2.5	0.1	10	1.98247	0.000161843	0.000101669	-0.038727	0.000773061	-0.000915462	0.00186513	0.00093982	0.000773733	0.0706429	0.0466512	-0.00139363	-0.00995726	-0.0274532	0.0001524	0.000641227	0.000333621	0.155354	-6.30466e-05	0.000469094	-8.06376e-05
17	2.5	0.1	10	-3.74652	-0.000993708	-0.000330579	0.150953	-0.000737939	0.00505997	0.0022313	0.00158835	-0.00603515	0.356135	0.164678	-0.00175083	-0.0249273	0.0547027	-0.000195566	0.000133145	-0.00101217	0.190804	-0.000637781	8.03704e-05	-0.000169082
17	2.5	0.1	10	2.11298	-0.000331549	-0.000192487	-0.0555096	-0.000155732	-0.00808909	0.00201452	0.00103796	-0.00594987	0.320614	0.0885257	-0.00137409	-0.0206294	0.0327156	5.18089e-05	0.000608884	-0.000956845	0.388585	-0.000151999	0.000390917	-0.000114643
17	2.5	0.1	10	2.20706	-0.000156397	-3.61136e-05	-0.0264842	-0.000147255	0.00268769	0.00173776	0.00125351	-0.0037421	0.17622	0.0941126	-0.00117017	-0.0202816	0.0435651	-0.000145957	-7.7246e-05	-0.000749705	0.056112	-0.000435044	0.000468054	-4.1715e-05
17	2.5	0.1	10	2.09135	0.00010294	0.000548134	0.0118099	0.000412051	0.0169841	0.00541951	0.00267856	0.000112191	0.347194	0.177405	-0.000190229	-0.0144592	0.049314	0.000238945	0.000489281	0.000626396	0.0828619	-0.000253069	0.000259331	0.000315405
17	2.5	0.1	10	-0.296345	-0.00035975	-5.39497e-05	0.0882151	-0.000371186	0.00260631	0.00143138	0.000987018	-0.00298079	0.12034	0.0626019	-0.000411893	-0.0170187	0.0591001	-2.36817e-05	0.000241197	-0.000514116	0.144144	-4.91062e-05	0.00028948	-0.000240443
17	2.5	0.1	10	-0.940553	0.000249964	0.000115815	0.0456103	0.000464471	0.00357595	0.00307768	0.00178513	-0.00271251	0.267549	0.136471	-0.000288928	-0.0187344	0.0844615	0.000575947	0.000777509	-0.000317238	0.299541	-8.85484e-05	0.000986139	0.000521738
17	2.5	0.1	10	1.90245	-4.27326e-05	0.00033089	-0.0127932	0.000511369	0.00374961	0.00389275	0.00143926	-0.00268116	0.342661	0.10368	3.84391e-06	-0.0127969	0.0464757	0.000563722	0.000752153	0.000830146	0.129362	-2.95818e-05	0.0004583	0.00016034
17	2.5	0.1	10	-0.547264	0.000377594	-9.29549e-05	0.141003	-0.000355639	0.000277557	0.0038752	0.00312586	-0.00466871	0.460845	0.318346	-0.00125354	-0.0225708	0.0647417	-2.0571e-05	0.000153793	-0.00132294	0.278433	-0.000660638	0.000283189	-0.000152326
17	2.5	0.1	10	0.798767	-0.000222439	-0.000226514	0.00304451	-0.000257436	0.0130145	0.00568266	0.00370924	0.00138205	0.319426	0.233404	-0.0011347	-0.0215565	0.0606911	-3.91966e-05	0.000491631	-0.000158531	0.176502	-0.000467841	0.000392164	0.000275256
17	2.5	0.1	10	0.345449	0.000105731	4.34274e-05	-0.0264508	-0.000109894	-0.00519513	0.000325551	0.000831763	-0.00290612	0.0122409	0.0473898	-0.000773923	-0.0204382	0.0730386	-0.000203818	-3.02989e-05	-0.000965204	0.108872	-0.000251661	0.000461265	-0.000551647
17	2.5	0.1	10	-3.30483	-0.000758583	0.000174532	0.00856655	-0.000260825	-0.00246534	0.000902375	0.000925247	-0.00529776	0.141673	0.0685764	-0.00107471	-0.0199292	0.0464938	-0.000244532	-0.000153774	-0.00120234	0.0935293	-0.000440814	-2.34764e-05	-0.000351188
17	2.5	0.1	10	-0.155139	0.000204604	-3.93324e-05	-0.076835	0.000116644	-0.00381155	0.00321498	0.00233556	-0.00508428	0.413264	0.237926	-0.00162833	-0.0251845	0.0719414	-0.000152935	0.000148639	-0.00129641	0.2681	-0.000540577	0.000142638	-0.000716733
17	2.5	0.1	10	1.82745	-0.000259327	0.000483619	0.0536251	-0.000130251	0.00771056	0.00390336	0.00209766	-0.00276349	0.347746	0.166591	-0.000635633	-0.017172	0.0477502	9.45726e-05	0.000205185	-0.000522336	0.132135	-0.000372455	0.00028314	2.21847e-05
17	2.5	0.1	10	-3.26027	-0.000511607	-0.000196231	0.00601469	-0.000361373	0.00126601	0.00410293	0.00403596	-0.00578342	0.585742	0.483399	-0.00169174	-0.0239791	0.0460847	-0.000224193	-0.000121049	-0.00113049	0.0963118	-0.000662142	0.000227841	-5.48571e-05
17	2.5	0.1	10	1.90735	-0.000340272	-0.000105025	-0.00170796	-0.000287546	-0.0011751	0.000332314	0.00116829	-0.00339467	0.0224613	0.0827925	-0.000606477	-0.0176789	0.054016	-0.000114369	4.92146e-05	-0.000226816	0.039596	-3.92969e-05	0.000248825	-0.000236027
17	2.5	0.1	10	-0.833109	0.000143918	-6.44762e-05	0.132176	-5.60631e-05	-0.00184912	0.000913985	0.00127708	-0.00409809	0.100926	0.0996999	-0.000166511	-0.0189221	0.0944897	0.000275587	0.000553179	-0.000644292	0.286165	-5.08358e-05	0.00115801	0.000254376
17	2.5	0.1	10	2.93804	-5.60582e-05	-2.93828e-06	-0.0677165	0.000378603	-0.00257762	0.00569346	0.00349135	-0.00364073	0.58011	0.323896	-0.000999013	-0.0189761	0.0421298	0.000224635	0.00068611	-0.000338255	0.272154	-5.97339e-05	0.000460002	-0.000188673
17	2.5	0.1	10	-4.74463	-0.000745325	-0.000136125	0.112244	-0.000592285	-0.00845029	4.99483e-05	0.00068654	-0.00720418	0.103364	0.0462768	-0.00163763	-0.0247859	0.0638736	-0.000425762	-0.000410519	-0.00164942	0.0369332	-0.00046523	-4.02543e-05	-0.000971235
17	2.5	0.1	10	1.38373	8.00064e-05	0.000488734	-0.00404053	0.000541858	0.0180285	0.00423224	0.00160149	0.000775438	0.238251	0.0935069	0.000115973	-0.012809	0.0516888	0.000252947	0.000496156	0.000385882	0.108937	-0.000258514	0.000493732	0.000265425
17	2.5	0.1	10	2.38665	0.00019496	0.000144576	-0.0477825	0.000443727	0.00417992	0.00575725	0.00338725	0.000868115	0.342808	0.21864	0.000200558	-0.0130442	0.0573014	0.000479119	0.00100605	0.000510502	0.232265	7.27315e-05	0.000560245	0.000300764
17	2.5	0.1	10	2.66573	-0.000338448	-8.61095e-05	-0.0362751	-9.9495e-05	-0.00549127	0.00172065	0.000835035	-0.00450063	0.205015	0.0535647	-0.0010804	-0.0186812	0.0343304	2.82353e-05	0.000249674	-0.00109551	0.263791	-0.000180303	0.000442806	-0.000384685
17	2.5	0.1	10	-0.648966	-6.95017e-05	-2.13842e-06	0.160777	3.50471e-05	0.00904466	0.00133894	0.00102998	-0.00238039	0.0953497	0.0639242	-0.00050434	-0.0187613	0.0712404	0.000208996	0.000353731	-0.00109186	0.311522	-0.00042661	0.00100373	0.000272232
17	2.5	0.1	10	1.97269	-3.01233e-05	-8.28102e-06	-0.0774034	0.000187268	1.36582e-05	0.00157336	0.00137111	-0.00488116	0.205016	0.118628	-0.00103786	-0.020621	0.0565658	-2e-05	0.000253966	-0.000131155	0.0957784	-8.51657e-05	0.000337275	-0.000117154
17	2.5	0.1	10	-4.02809	-0.000538931	-0.000118022	0.00294436	-7.25948e-05	-0.00834822	0.00185719	0.00128138	-0.00537988	0.264888	0.113839	-0.00127491	-0.0254409	0.115145	-5.94987e-05	0.000108204	-0.00109608	0.197651	-0.000319995	0.000464746	-0.000312096
17	2.5	0.1	10	-3.66313	-0.000758625	-0.000136542	-0.00077867	-0.000584297	-0.0029942	0.00216954	0.00155814	-0.00497832	0.280769	0.142184	-0.00170644	-0.0260391	0.0803897	-0.000307975	7.6926e-05	-0.00100576	0.164172	-0.000489996	-2.56167e-05	-0.000365494
17	2.5	0.1	10	0.513887	-0.000499376	-4.51977e-05	0.138476	-0.000148815	0.00803668	0.0058212	0.00560645	-0.00330719	0.56751	0.524355	-0.00124709	-0.021922	0.0566191	0.000133253	0.000333293	-0.00113474	0.313885	-0.000708384	5.10415e-05	-0.000211127
17	2.5	0.1	10	1.06964	0.000298995	-8.74435e-05	-0.113405	-9.00849e-05	-0.00338202	0.00237434	0.00184664	-0.00503907	0.308811	0.177848	-0.00177123	-0.0271079	0.0979949	-0.000338615	3.51488e-06	-0.00123552	0.1786	-0.000524585	0.000380864	-0.000329516
17	2.5	0.1	10	1.615	-0.000117112	1.4911e-05	-0.0238917	0.000144595	-0.00639688	0.00287263	0.00162128	-0.00648294	0.48472	0.179232	-0.00189144	-0.0250518	0.0421473	-4.06841e-06	0.000285195	-0.00104884	0.268426	-0.000137686	0.000128755	-0.00041167
17	2.5	0.1	10	-2.58149	-0.000682962	-0.000199181	0.11075	-0.000382972	0.00354653	0.00402945	0.00217547	-0.00259011	0.350929	0.171385	-0.000503402	-0.0175049	0.0584113	0.000152245	0.000402769	-0.000458042	0.193834	-0.000532867	0.000395605	0.000101351
17	2.5	0.1	10	1.49699	2.60855e-05	0.000103906	-0.00222247	-3.0318e-06	0.0017138	0.00478116	0.00344578	-0.00235988	0.408189	0.283752	-0.00112428	-0.0215704	0.0616619	0.000111874	0.000419123	0.000469263	0.0793359	-2.0555e-05	0.000316887	2.59237e-05
17	2.5	0.1	10	0.862431	-0.000174742	-0.000202035	-0.0640807	-0.000373595	-0.00491048	0.000918644	0.000986887	-0.00590952	0.170498	0.081259	-0.00176726	-0.026695	0.087994	-0.000425595	-0.000164423	-0.000782646	0.0250279	-0.000540573	0.000182001	-0.000420905
17	2.5	0.1	10	1.86435	2.68256e-05	0.000360266	0.0349059	8.60572e-05	0.0109891	0.00496155	0.00332219	-0.00329636	0.481152	0.296482	-0.00075979	-0.0178404	0.0464308	6.09304e-05	0.000107199	-0.000541973	0.098702	-0.00045568	0.000253506	0.000103227
17	2.5	0.1	10	-3.3334	-0.000628669	3.91638e-05	-0.0417957	-0.000267427	-0.00811061	0.00236319	0.00153897	-0.00538014	0.328432	0.146185	-0.00104293	-0.0214608	0.0664405	-0.00029264	-0.0004149	-0.000821484	-0.0740258	-0.000156209	-0.000137605	-0.000380941
17	2.5	0.1	10	2.36382	-0.000128059	3.41397e-05	0.0188596	0.000149284	0.00327508	0.00299607	0.00159316	-0.00184842	0.226656	0.110656	-0.00024233	-0.0144446	0.0466269	0.000402068	0.00104758	0.000363293	0.264831	-5.24866e-05	0.000588685	0.000152438
17	2.5	0.1	10	-0.393611	-0.000292001	3.80722e-05	0.106378	0.00023322	0.00116312	0.0011366	0.000794525	-0.00271005	0.0849228	0.0432946	-6.34549e-05	-0.0136818	0.0496462	0.000558983	0.000978308	-2.01231e-05	0.308396	-3.08034e-05	0.000505882	-5.50008e-05
17	2.5	0.1	10	-1.15378	-0.000760744	-0.00015005	0.0625923	-0.000175873	0.00397882	0.0029816	0.00127368	-0.00295647	0.268859	0.0900853	-0.00121125	-0.02106	0.0490314	0.000125575	0.000380604	-0.000842983	0.261049	-0.000692353	0.000100903	-0.000166305
17	2.5	0.1	10	2.0102	0.000136972	-0.000112918	-0.0670751	0.000187469	0.017364	0.00448968	0.00264729	-0.0017052	0.349948	0.200046	-0.000526468	-0.0177444	0.0593579	0.000225676	0.000414723	-0.000471555	0.200491	-0.000581349	0.000394755	0.000137978
17	2.5	0.1	10	-0.332213	-0.000336239	-0.000169395	-0.0308138	-0.000344304	0.000937492	-0.00022012	0.000750491	-0.00422043	-0.0195734	0.0431206	-0.000954764	-0.0226771	0.0911563	-0.000297888	-0.00017969	-0.000679121	0.00664123	-0.000485678	0.000366163	-0.000502563
17	2.5	0.1	10	2.973	0.000311547	-3.65609e-06	-0.122208	0.000338223	-0.000395276	0.00404661	0.00300264	-0.00357508	0.406422	0.271799	-0.000566467	-0.0191651	0.0718178	0.000122047	0.000463192	3.99092e-05	0.140069	-0.000100437	0.000560844	7.69662e-05
17	2.5	0.1	10	-3.21332	-0.000629041	-3.5001e-05	-0.0340505	-0.000165303	-0.00548652	0.00238771	0.00115732	-0.00412392	0.261544	0.0869487	-0.000965395	-0.0199021	0.0536185	-0.000129336	-5.76352e-05	-0.000463261	0.0283426	-0.000122727	0.000183129	-0.000253789
17	2.5	0.1	10	0.556715	-0.000265191	-7.0168e-05	0.00130639	0.000189024	-9.81212e-06	0.00214653	0.000953293	-0.00397501	0.228752	0.0640332	-0.000964297	-0.0180558	0.0360818	0.000187438	0.000622805	-3.76519e-05	0.200281	-0.000132886	0.00050645	-0.000265677
17	2.5	0.1	10	0.106897	-0.000446216	4.32825e-05	0.0221091	-0.000238341	-0.00924318	0.00119673	0.000745576	-0.0060115	0.213321	0.0492716	-0.00138709	-0.0220301	0.0469243	6.84539e-05	0.000238925	-0.00126886	0.306422	-0.000182889	0.000583865	-0.000496087
17	2.5	0.1	10	-1.239	-0.000361151	-0.000234532	0.013493	-0.000246798	0.00586808	0.00124772	0.000976627	-0.0040702	0.136059	0.0670505	-0.00102141	-0.0205795	0.0572586	1.156e-06	0.000534557	-0.000460589	0.241851	-0.000582222	0.000378339	-0.000196549
17	2.5	0.1	10	-1.16887	-0.000693185	-0.000433507	0.0797698	-0.000563951	-0.00548524	0.000578835	0.000696705	-0.00663734	0.158093	0.0451654	-0.00167783	-0.0241725	0.0501897	-0.000261902	0.000157986	-0.00125019	0.260013	-0.000728532	0.0002658	-0.000436261
17	2.5	0.1	10	-1.22107	-0.000314557	-0.000193073	-0.0444221	-0.000554347	-0.00439578	0.000972539	0.0012881	-0.00544932	0.156774	0.115558	-0.00180068	-0.0272444	0.0977558	-0.000270161	0.000199095	-0.00124458	0.279187	-0.000592809	0.000426036	-0.000440149
17	2.5	0.1	10	-1.75613	-0.00028711	-0.00010818	-0.0221808	-0.000318699	-0.00448048	0.0016478	0.00107756	-0.00582985	0.263787	0.0926245	-0.00142596	-0.0230207	0.0564885	-0.000282992	-0.000173343	-0.000767849	0.0195689	-0.000166156	0.000408209	-0.000395458
17	2.5	0.1	10	1.66753	-0.000172983	7.77602e-06	-0.0139961	0.00013735	-0.00215879	0.0015509	0.000757522	-0.00366539	0.154076	0.0422455	-0.000766192	-0.0174516	0.0426443	0.000411115	0.00069428	-0.000190628	0.247996	-7.89037e-05	3.33839e-05	-0.00015018
17	2.5	0.1	10	-1.43978	-0.000110979	-0.000291503	-0.0273454	0.000106353	0.00772449	0.000205503	0.000898079	-0.00551631	0.0616934	0.0665964	-0.000813115	-0.0199623	0.0646204	-0.00012514	0.000354488	-4.19483e-05	0.116775	-0.000606363	0.000671291	-3.83557e-05
17	2.5	0.1	10	-3.44614	-0.000845512	-8.93826e-05	0.0964768	-0.000456925	-0.00728897	0.00298515	0.0012368	-0.00549547	0.41517	0.109612	-0.00126896	-0.0205003	0.038882	6.03161e-05	0.000324181	-0.000904302	0.251071	-0.000231552	0.000496057	-0.000332232
17	2.5	0.1	10	1.11479	0.00117501	0.000730847	-0.0121453	0.000398175	0.0182372	0.00618474	0.0037589	0.00011684	0.403857	0.257602	-0.000442947	-0.0173919	0.0608434	4.93736e-05	0.000131536	0.000369814	0.00939683	-0.000351117	0.000866159	1.33354e-05
17	2.5	0.1	10	-2.98449	-0.000255906	0.000200609	0.0698196	-0.00012037	0.00134471	0.00611914	0.00632788	-0.00226737	0.524044	0.541687	-0.00092511	-0.0203342	0.0612026	0.000324143	0.000686995	-0.000265578	0.258902	-0.000123964	0.000330896	-9.73905e-05
17	2.5	0.1	10	-2.59391	-0.000132665	-0.000283299	-0.148968	-0.000448259	-0.00287333	0.00178856	0.00138593	-0.0049053	0.231622	0.12068	-0.00149708	-0.0251844	0.0857759	-0.000210044	0.000111239	-0.0015121	0.315213	-0.000583755	0.000637865	-0.000474409
17	2.5	0.1	10	2.69398	-0.000261713	7.08835e-05	0.00847213	0.000202017	-0.000533805	0.00305574	0.00119765	-0.00388011	0.320697	0.0893617	-0.000834137	-0.0179677	0.0431315	0.000244807	0.000834871	0.000212632	0.226917	-0.000100286	0.000160314	-8.87958e-05
17	2.5	0.1	10	-0.134333	-0.00055892	-0.000272812	0.0244768	-0.000481003	0.00597162	0.00181418	0.00101634	-0.00422817	0.203706	0.0723055	-0.00149834	-0.0226476	0.0454626	-5.65865e-05	0.000348826	-0.000966572	0.276582	-0.00070635	0.000189242	-7.89505e-05
17	2.5	0.1	10	2.27295	9.55914e-05	-5.10599e-05	0.0554661	0.000286183	0.0106038	0.00610162	0.00495365	-0.00202111	0.507141	0.408878	7.7456e-06	-0.00978123	0.028305	0.000462662	0.000255721	-0.00030216	0.118359	-0.000630078	0.000403636	9.92514e-05
17	2.5	0.1	10	-3.70966	-0.000878511	-0.000119438	0.0521429	-0.000558988	-0.00803665	0.00138284	0.00103921	-0.0061086	0.244346	0.0903075	-0.00150906	-0.0229044	0.0478314	-0.000179445	-1.4243e-05	-0.00106589	0.134408	-0.000223735	-6.16288e-05	-0.000474727
17	2.5	0.1	10	1.74376	3.62176e-05	-2.72362e-05	-0.0786235	0.000381257	-0.00563233	0.00162558	0.00086644	-0.00526302	0.229767	0.0610705	-0.00133477	-0.0214844	0.0446139	0.000112079	0.00047259	-0.000888512	0.310858	-0.00017246	0.000119658	-0.000470256
17	2.5	0.1	10	-2.83036	-0.000427406	-0.000252918	-0.0214786	-0.000363586	0.00112561	0.00228522	0.00181474	-0.00556741	0.3307	0.184796	-0.00148794	-0.0231489	0.052902	-0.000134201	0.000260506	-0.00112889	0.277591	-0.000684321	0.000356814	-0.000132484
17	2.5	0.1	10	2.09526	-0.000458379	-0.000356005	0.0153255	-0.000191128	0.0013049	0.000369242	0.00073133	-0.00414374	0.0431257	0.0408053	-0.000965228	-0.0180999	0.0364004	0.00011062	0.000360088	-0.00126988	0.36853	-0.000729091	0.00012427	-0.000286992
17	2.5	0.1	10	0.655011	-7.87926e-05	-0.00013064	-0.0739051	-0.000419459	-0.00308759	0.00268809	0.00365948	-0.00597393	0.413637	0.444424	-0.00160728	-0.0257806	0.0861595	-0.000233338	0.000117427	-0.00124373	0.237837	-0.000593458	0.000471889	-0.000426643
17	2.5	0.1	10	0.905941	-0.000229268	-7.84048e-05	-0.0211845	-0.000201121	-0.00205873	0.00138237	0.00099365	-0.00408607	0.151147	0.0689779	-0.000761575	-0.0195978	0.0639428	-0.000157284	-4.42528e-05	-0.000599037	0.0493703	-0.000144439	0.000478973	-0.000261441
17	2.5	0.1	10	-0.19761	-0.000485299	-0.000171387	-0.0155138	-0.000231693	-0.00877263	-0.000433463	0.000630123	-0.00660737	0.0063299	0.0351497	-0.00107666	-0.0178213	0.0274523	1.46564e-05	0.000325485	-0.00134806	0.377108	-0.000261198	0.000282976	-0.000577795
17	2.5	0.1	10	2.01383	7.30026e-05	-0.00032302	-0.0971918	0.000249304	0.00152301	0.00180018	0.000976604	-0.00284316	0.151495	0.0609889	-0.00072302	-0.0173388	0.0441754	0.000291965	0.000380226	-0.00134831	0.406284	-0.0007191	0.000602412	-0.000249369
17	2.5	0.1	10	1.35035	-0.000288913	1.74132e-05	0.000870061	-0.00019715	0.00179962	0.0018395	0.00111088	-0.00240225	0.141648	0.071415	-0.000416652	-0.0166835	0.0557816	7.2422e-05	0.000276715	-0.000331228	0.1296	-0.000130263	0.000274157	-0.000198598
17	2.5	0.1	10	0.75244	0.000277507	5.49047e-06	-0.00132045	5.66554e-05	-0.00405998	0.00452371	0.00370856	-0.00374738	0.466698	0.349958	-0.000583412	-0.0184006	0.062478	0.000144042	0.000452594	-0.000628744	0.244115	-0.000319206	0.000387868	-0.000463755
17	2.5	0.1	10	0.976219	0.000238615	-0.000136416	0.000796742	0.000190006	-0.0029909	0.00370553	0.00174464	-0.00246668	0.315105	0.130007	-0.000695279	-0.0215708	0.0944183	0.000153117	0.000339647	-0.000733334	0.220861	-0.000371334	0.000772359	-0.000262943
17	2.5	0.1	10	1.91177	-0.000202844	-0.000128296	-0.0915005	8.85952e-05	-0.00440293	0.00220967	0.00125589	-0.005225	0.299772	0.108818	-0.00144335	-0.0215123	0.0366788	-4.91815e-05	0.000250494	-0.000802433	0.198413	-0.000224201	4.907e-05	-0.000344098
17	2.5	0.1	10	-2.49	0.000104325	0.000449497	0.0346643	0.000501455	0.0141122	0.00313097	0.00137046	-0.000206774	0.185852	0.0817772	-0.000610444	-0.0186123	0.0629997	0.000309025	0.000982393	0.000634764	0.209655	-0.000353098	0.000184501	0.000300265
17	2.5	0.1	10	2.13685	-0.00048668	9.00985e-05	0.0440228	-0.000361935	-0.0105387	0.00140376	0.000938229	-0.00703095	0.309951	0.0852869	-0.0017312	-0.0232382	0.0328554	-0.000112865	0.000286518	-0.00132848	0.349847	-0.000280171	0.000147496	-0.000497112
17	2.5	0.1	10	-1.93976	-0.000271603	-9.76738e-05	0.050364	-0.000317868	-0.00259167	0.00189948	0.00101708	-0.0053711	0.269698	0.0805842	-0.00114117	-0.0215318	0.059888	-0.000160828	6.80402e-05	-0.00103129	0.165295	-0.000300274	0.000473048	-0.000586853
17	2.5	0.1	10	1.9189	-0.000272535	-0.000204288	0.0138893	-1.64707e-05	0.00502879	0.00415453	0.00268947	-0.00450744	0.480721	0.263435	-0.00112192	-0.0198176	0.0421786	7.93307e-05	0.000249184	-0.000877376	0.213113	-0.000731607	0.000312418	-0.000128336
17	2.5	0.1	10	1.37874	-0.000435572	-8.2525e-05	0.059168	-0.000611006	-0.000789309	0.00589235	0.00277889	-0.00226794	0.503607	0.221317	-0.0017471	-0.0241066	0.042665	-0.00011459	0.000116915	-0.00101383	0.183834	-0.000519282	3.7514e-05	-0.000292073
17	2.5	0.1	10	1.85283	-0.000320961	-0.000317688	0.0127322	-0.000298248	0.00533189	0.0025133	0.00134631	-0.00246673	0.205508	0.0933909	-0.000794205	-0.0186689	0.0521096	0.000128371	0.000470717	-0.00047104	0.220693	-0.000660579	0.000399832	-2.34321e-05
17	2.5	0.1	10	0.141738	-0.000331658	-4.86357e-05	0.00837153	-0.000159588	-0.00156676	0.00252541	0.00158524	-0.00479935	0.31272	0.142696	-0.000784477	-0.0205463	0.0736524	-0.000117225	5.19306e-05	-0.000295809	0.0480497	-0.000221809	0.000344011	-0.000310948
17	2.5	0.1	10	-1.32789	-0.000495557	-0.000256022	0.0041874	-0.000440926	-0.0050028	0.00266225	0.00167739	-0.00607448	0.418322	0.177733	-0.00190797	-0.0265821	0.0679038	-0.000306854	1.6931e-06	-0.00174849	0.336332	-0.000697791	0.000375896	-0.000677237
17	2.5	0.1	10	-0.181918	-0.00046927	-3.40587e-05	0.0399812	-0.000335009	0.00110704	0.00194805	0.0010295	-0.00360214	0.192657	0.0699864	-0.000633743	-0.0171909	0.0480226	5.49004e-05	0.000300736	-0.000617572	0.18375	-0.000187588	0.000504579	-0.000272143
17	2.5	0.1	10	0.197129	-0.000258196	-0.000196142	-0.104715	-0.000189843	-0.00432033	0.00148108	0.00121414	-0.00686878	0.309571	0.126136	-0.00170002	-0.0263056	0.0870574	-0.000398564	-0.000192102	-0.00130057	0.0927129	-0.000685062	0.000358903	-0.000551706
17	2.5	0.1	10	-1.13466	-0.0004944	-0.000133727	0.00436181	-0.000125508	-0.00139859	0.00097263	0.000873105	-0.00427659	0.112964	0.0568148	-0.00095995	-0.0185692	0.0408437	7.13197e-06	0.00031085	-0.000622882	0.188575	-0.000245355	0.000485291	-0.000339902
17	2.5	0.1	10	-0.870101	-0.000401213	-6.73351e-05	0.00950204	-0.000399015	-0.00332539	0.000564424	0.000926034	-0.00502841	0.0905508	0.066942	-0.000876053	-0.0188475	0.0487075	-0.000166749	0.000111651	-0.000894802	0.15791	-0.000283783	0.000403084	-0.00048331
17	2.5	0.1	10	1.34148	0.000841589	7.2749e-05	-0.111238	0.000676272	0.0109413	0.00415391	0.00242191	-0.00202676	0.335396	0.185385	-0.000267634	-0.0143685	0.0448127	0.00022742	0.000128364	0.000230479	0.0201562	-0.000500315	0.000224314	-5.89434e-05
17	2.5	0.1	10	1.72279	-0.000567969	-0.000145717	0.00133111	-0.000216882	-0.00447826	0.00320969	0.00136688	-0.00460986	0.380324	0.114932	-0.00115722	-0.0195407	0.0371552	0.000143147	0.0003933	-0.000785213	0.253444	-0.000171039	0.000689269	-0.000258279
17	2.5	0.1	10	-3.87612	-0.0010028	-0.000105888	0.119662	-0.000584249	-0.0110863	0.000911773	0.000705275	-0.00780623	0.289995	0.0530386	-0.0017017	-0.0235136	0.0388974	-0.000137108	-1.94879e-05	-0.00163933	0.280694	-0.000303687	0.000359176	-0.000686569
17	2.5	0.1	10	-1.22915	0.000104003	0.00101414	0.109242	0.000900848	-0.0107468	0.00136683	0.000965186	-0.0066648	0.277454	0.0854803	-0.00154314	-0.0233344	0.0506142	-0.000100412	-0.000171011	-0.00159037	0.171543	-0.000342017	0.000302081	-0.000701503
17	2.5	0.1	10	0.682393	0.000168184	-0.000111316	-0.0681511	0.000126648	-0.000443286	0.00356042	0.00283864	-0.00437592	0.404761	0.276426	-0.0010861	-0.0228883	0.083521	2.49803e-05	0.00033144	-0.000568374	0.186702	-0.000587535	0.000754467	-0.000389734
17	2.5	0.1	10	-0.440315	-0.000613597	-0.000282386	0.0719034	-0.000535488	0.00545457	0.00186395	0.00101205	-0.00432969	0.21357	0.072472	-0.00133062	-0.0219019	0.0498233	2.03293e-06	0.000239812	-0.00105534	0.249202	-0.000755271	0.00024618	-0.000180836
17	2.5	0.1	10	2.25177	-0.000528787	-8.32935e-05	-0.0121301	-8.1658e-05	-0.00752221	0.00339136	0.00141331	-0.00539495	0.458716	0.130621	-0.00115748	-0.0184998	0.0280028	9.23523e-05	0.000264928	-0.00086057	0.216255	-0.000257668	0.000461463	-0.000397682
17	2.5	0.1	10	-2.83369	-0.000481892	-1.69051e-05	0.0289438	-0.000160985	-0.00264885	0.00323732	0.00289901	-0.00322384	0.306037	0.252654	-0.000866482	-0.0194381	0.055287	4.14613e-05	0.000474323	-0.000207028	0.17811	-0.000262276	0.000624455	-0.000317061
17	2.5	0.1	10	-4.58348	-0.000676308	-0.000152461	-0.0166429	-0.000437841	-0.00830485	0.00055275	0.000958611	-0.00733549	0.193271	0.0922309	-0.00175127	-0.0265045	0.0854537	-0.000308667	-9.94149e-05	-0.00153879	0.200082	-0.000653734	0.000195712	-0.000694367
17	2.5	0.1	10	0.810396	0.000668269	0.000269914	-0.0136139	0.000605391	0.0077269	0.00690178	0.00686192	-0.00139471	0.537973	0.547929	-7.90725e-05	-0.018033	0.0890963	0.000255229	9.52741e-05	0.00234255	-0.0997678	-0.000402469	0.000319095	0.00122254
17	2.5	0.1	10	-1.01713	-0.000440397	-7.01176e-05	0.0544235	-9.76059e-05	-0.00619244	0.00105435	0.000656349	-0.00440566	0.126365	0.0331679	-0.000940354	-0.0186926	0.0431946	9.87821e-05	0.000352808	-0.000903862	0.263275	-0.000175823	0.000274705	-0.000472463
17	2.5	0.1	10	2.51948	-0.000131463	6.80272e-05	-0.0757531	0.000420061	-0.00102333	0.0031528	0.00139086	-0.00415398	0.346239	0.112593	-0.000779829	-0.0159108	0.0298081	0.000128373	0.000356324	-0.000105856	0.125491	-0.000179794	0.000210678	-0.000149054
17	2.5	0.1	10	-3.56849	-0.000453336	-7.20803e-05	-0.0497819	0.000240616	-0.000865811	0.000813728	0.000769451	-0.0028601	0.057949	0.0413054	-4.38677e-05	-0.0167317	0.0769943	9.03064e-05	7.58489e-05	-0.000231479	0.0489754	-0.000266594	0.000330039	-0.000419132
17	2.5	0.1	10	1.99517	-1.05725e-05	-0.000123523	0.0803143	9.08984e-05	0.0120887	0.00436935	0.00209242	-0.00297048	0.403235	0.169106	-0.000761614	-0.0165843	0.0358274	0.000319736	0.000447247	-0.000698542	0.256469	-0.000709596	0.000251974	4.94136e-05
17	2.5	0.1	10	-1.42708	-0.000432552	-0.000224495	-0.0333213	-0.0004265	-0.00886681	0.000804229	0.00092763	-0.00787866	0.276575	0.0942184	-0.00202263	-0.0265057	0.0522463	-0.000353514	-0.000260132	-0.00173549	0.155819	-0.000735009	0.000781796	-0.00077679
17	2.5	0.1	10	0.0263357	-0.00032574	-0.000175685	0.0338472	-0.000365401	-0.00842438	0.000885299	0.000811356	-0.00549304	0.147549	0.055399	-0.0012968	-0.0213384	0.0458254	-0.000252687	3.5555e-06	-0.00137186	0.212311	-0.000424631	0.000238162	-0.000791721
17	2.5	0.1	10	0.794008	0.000220752	7.01998e-05	-0.0291064	-0.000243033	6.86527e-05	0.00356654	0.00293835	-0.00499188	0.448767	0.307627	-0.00169859	-0.0256944	0.0741524	-0.000152161	0.000226293	-0.00111987	0.258996	-0.000556712	0.000325273	-0.000361838
17	2.5	0.1	10	0.0944238	-0.000202719	-0.000139736	0.0487689	-6.95282e-05	-0.00598684	0.00238391	0.00148741	-0.00613315	0.384609	0.152713	-0.00134394	-0.0219094	0.0488704	-0.000127278	-2.79771e-05	-0.00159206	0.259317	-0.000442103	4.74918e-05	-0.00077686
17	2.5	0.1	10	-3.88201	-0.000925538	-0.000170742	-0.0680078	-0.000149107	-0.0117738	0.000575482	0.000893204	-0.0078244	0.23063	0.0872056	-0.00197728	-0.0240027	0.019651	-0.000239829	-0.000122696	-0.00153636	0.185649	-0.00027519	0.000530342	-0.000745781
17	2.5	0.1	10	4.3281	0.000530804	0.000807387	0.0530054	0.0012335	-0.00893114	0.00267212	0.00135615	-0.00437672	0.305761	0.111142	-0.00160138	-0.0230693	0.0420416	-0.000106694	3.92384e-05	-0.00136253	0.228954	-0.000364911	0.000622809	-0.000685619
17	2.5	0.1	10	-4.51342	-0.000752815	-0.000294217	-0.0425321	-0.00015195	-0.00623805	-0.000258889	0.000701579	-0.00632768	0.0236992	0.0445373	-0.00146777	-0.0245592	0.0768924	-0.000362387	-0.000346791	-0.00148175	0.0429303	-0.000619	0.000542156	-0.000820429
17	2.5	0.1	10	6.60223	-0.000159432	1.60175e-05	-0.01121	0.000249927	-0.000188235	0.00243638	0.00121547	-0.00233386	0.193845	0.0805639	-0.000781856	-0.0177078	0.0439472	0.000182724	0.000752952	0.000170706	0.209088	0.000172211	0.00105084	-3.42298e-05
17	2.5	0.1	10	-3.84779	-0.000875474	-0.000256437	0.0824872	-0.000660995	-0.00543734	0.00282251	0.00181944	-0.00574431	0.413325	0.189362	-0.00136056	-0.0238249	0.0744774	-0.000125579	-6.04202e-05	-0.00102404	0.105606	-0.000392348	0.000722404	-0.000631371
17	2.5	0.1	10	2.10869	-0.000452813	-4.01852e-05	-0.0382834	-3.14816e-05	-0.00406401	0.00291943	0.00168146	-0.00572582	0.424602	0.170829	-0.00120862	-0.0190099	0.0290619	1.35985e-05	0.000354023	-0.000594677	0.199934	0.000125516	0.000216392	-0.000411911
17	2.5	0.1	10	2.07436	-0.000302287	-6.89551e-05	-0.052195	0.000170807	-0.00746026	0.00474833	0.00428304	-0.00608852	0.706968	0.537135	-0.0016	-0.0209911	0.0198363	-3.8981e-05	-5.07927e-05	-0.0012362	0.151523	-2.12808e-06	0.000275016	-0.000511262
17	2.5	0.1	10	1.00922	-1.43156e-05	3.16991e-05	0.0480841	0.000207657	0.0195769	0.007002	0.00821095	-0.00126933	0.538795	0.654114	-6.46056e-05	-0.0129885	0.0446556	0.000232728	0.000287814	-0.000170354	0.111662	-0.000261351	0.000189079	2.5357e-05
17	2.5	0.1	10	0.990003	-0.000420096	-4.32582e-05	-0.0206502	-0.000189289	-0.00259511	0.00478049	0.00463942	-0.00525115	0.618963	0.527168	-0.00183787	-0.0254119	0.0536491	-0.000148184	0.000147748	-0.000948195	0.183987	-0.000327421	0.000431403	-0.000510971
17	2.5	0.1	10	1.72179	-0.000140962	-0.000305995	-0.0653451	0.000230678	-0.00142883	0.00164868	0.00103045	-0.00439656	0.19247	0.0749567	-0.00122694	-0.0174131	0.0156163	0.000112955	0.000298647	-0.00106369	0.278398	-0.000691892	0.000542056	-0.000356587
17	2.5	0.1	10	-0.985075	-0.000472249	-0.000184766	-0.00853765	-0.000181884	-0.00604126	0.00122773	0.00105403	-0.00534531	0.184269	0.084993	-0.00135749	-0.0150618	-0.00547952	-0.000132994	0.00043535	-0.00100551	0.325224	0.000505837	0.000500066	-0.000380568
17	2.5	0.1	10	-1.59784	-0.000221023	-5.36415e-05	0.0329702	0.000173381	0.00325207	0.00276045	0.00141885	-0.0030792	0.252707	0.105122	-0.000621321	-0.0158355	0.037686	0.000381436	0.00121502	0.000366944	0.310823	0.000528112	0.00118047	-0.000111175
17	2.5	0.1	10	1.32388	-0.000305268	9.07926e-05	0.00465526	-5.92993e-05	0.00372631	0.00379172	0.00308711	-0.00458771	0.445366	0.311118	-0.00140759	-0.0233943	0.0634599	4.62987e-05	0.000380833	-0.000591204	0.209461	-0.000233848	0.000388671	-0.000253554
17	2.5	0.1	10	0.36291	0.000748041	7.1284e-05	-0.055682	0.00100768	0.00339359	0.00171527	0.00109008	-0.002268	0.126509	0.0688558	0.000222289	-0.0108299	0.0431583	0.000392675	0.000786357	-0.000440531	0.328351	0.000121661	0.000690514	-0.000258892
17	2.5	0.1	10	-2.63774	-0.0005868	-0.000110539	0.00236883	4.21677e-05	-0.00652262	0.00413243	0.00272285	-0.00605413	0.618298	0.320677	-0.00145616	-0.0194988	0.0170593	-6.20588e-05	-8.54658e-07	-0.00104686	0.136923	0.000149167	0.000427223	-0.000488147
17	2.5	0.1	10	-3.87433	-0.000958289	-0.000285427	0.00310152	-0.000292595	-0.0121694	0.000929401	0.000642097	-0.00724382	0.249368	0.0391943	-0.00181501	-0.0235819	0.0295636	-0.000138316	-5.65847e-05	-0.00138718	0.18378	-0.000132203	0.000230282	-0.000686882
17	2.5	0.1	10	-1.31442	-0.000810472	-0.000243726	0.0440925	-0.000441583	-0.0101883	7.23666e-05	0.000593054	-0.00871624	0.201452	0.0362341	-0.00192413	-0.0246127	0.0324837	-0.000231908	8.14008e-06	-0.00166356	0.307006	-0.000218378	0.00052167	-0.000797797
17	2.5	0.1	10	5.26087	0.00100574	0.00087912	0.091339	0.00161797	-0.00775493	0.00405602	0.00227938	-0.00325197	0.388515	0.191924	-0.00173884	-0.0237523	0.0386367	-9.50313e-06	0.000243593	-0.00148226	0.380753	0.000100719	0.000527137	-0.000259571
17	2.5	0.1	10	0.701477	-0.000789005	-0.000443152	-0.0321019	-0.000540371	-0.00713193	0.00171299	0.00107869	-0.00783805	0.438219	0.121068	-0.00206344	-0.0243431	0.0154104	-0.000293912	-8.18161e-05	-0.00198909	0.388644	-0.000691725	0.000104266	-0.000649355
17	2.5	0.1	10	-1.51648	-0.000673162	-0.000459804	-0.0425859	-0.00018585	-2.97166e-05	0.00157799	0.000990737	-0.00751032	0.380238	0.100046	-0.00192125	-0.0242329	0.0277641	-0.000243331	-0.000201007	-0.00145374	0.119886	-0.000578924	0.000316957	-0.000413008
17	2.5	0.1	10	-1.38999	-0.000823208	0.000100906	0.0747802	-0.000118491	-0.00155475	0.00578267	0.00388186	-0.0033465	0.566603	0.353869	-0.000736484	-0.0150882	0.0263681	0.000269048	0.00033453	0.000251522	0.0775499	0.000397942	0.000248253	7.78935e-05
17	2.5	0.1	10	0.23672	-0.000444753	-7.64322e-05	0.00341497	-0.000388857	-0.00810773	0.00239901	0.00161101	-0.00711294	0.476128	0.194167	-0.00217206	-0.0251007	0.013574	-0.000261186	0.000180343	-0.0011609	0.24749	-0.000110194	7.79058e-05	-0.000978743
17	2.5	0.1	10	4.76899	-3.31614e-05	0.000146986	0.0363943	0.000256218	0.00965408	0.00202438	0.00146089	0.00106121	0.076654	0.0821939	0.000580627	-0.0044988	0.0239914	0.000540255	0.000899128	0.000185063	0.249828	0.000288241	0.000768791	-0.000122193
17	2.5	0.1	10	-0.526105	3.61702e-05	0.000259776	0.101987	0.000343417	0.00945872	0.00746175	0.00397247	0.00311001	0.374883	0.226486	0.000826204	-0.00515921	0.0351947	0.000734494	0.00101986	0.0010399	0.171916	0.00054853	0.000587564	0.00156492
17	2.5	0.1	10	2.16273	8.26246e-05	0.0001492	-0.0329431	9.86677e-05	0.00732738	0.00232225	0.00128537	-0.00367381	0.234128	0.096849	-0.00116482	-0.0196857	0.0380218	0.000127067	0.000858915	0.000156972	0.242355	-0.000156994	0.000263005	5.70762e-05
17	2.5	0.1	10	-3.03062	-0.000737902	-6.07379e-05	0.0828702	-6.89546e-05	0.00479999	0.00308122	0.00108916	-0.00387221	0.322968	0.0778461	-0.00159023	-0.0246234	0.0658638	2.24588e-05	0.000474812	-0.000140793	0.168434	-0.000336096	4.88671e-05	-0.000166783
17	2.5	0.1	10	2.23274	0.000402911	9.86019e-05	-0.14171	0.000915028	-0.00257858	0.00662954	0.00647547	-0.00437227	0.746578	0.681648	-0.00130177	-0.016976	0.00841304	3.09255e-05	0.00039699	-0.00129002	0.394286	-0.000310464	0.000360795	-0.000844236
17	2.5	0.1	10	-0.928162	-0.000342908	-0.000110136	0.0402442	-3.22009e-05	0.00147251	0.00174835	0.00094427	-0.00656868	0.32724	0.0813965	-0.00209236	-0.0274913	0.0640903	-0.000198178	0.000132156	-0.000634693	0.121866	-0.000476775	3.68304e-05	-0.000484826
17	2.5	0.1	10	3.2009	-7.85163e-05	-2.04216e-05	-0.0235875	-0.000183459	-0.00448962	0.00216579	0.000903239	-0.0025174	0.175226	0.0528352	-0.000352013	-0.0113897	0.0220472	0.000326436	0.000806782	-7.2465e-05	0.263842	0.000461316	0.000610217	-0.000238346
17	2.5	0.1	10	3.38208	0.000389793	0.000167361	0.0555487	0.000624527	0.0216219	0.00517983	0.00195698	0.002675	0.247563	0.106412	0.00107697	-0.00526478	0.0442251	0.000767421	0.00122774	0.000901906	0.237335	5.55545e-05	0.000786123	0.000600305
17	2.5	0.1	10	4.32219	0.00126465	0.000469867	-0.105528	0.00127959	0.0202444	0.00618269	0.00272768	0.00232826	0.321054	0.157603	0.00116563	0.00125648	0.0196456	0.000568482	0.000641117	0.0022636	0.00218447	0.000680938	0.000712139	0.00131446
17	2.5	0.1	10	0.0339339	-9.00118e-06	0.000252049	-0.0571946	0.000842765	0.0152271	0.00240182	0.00120894	0.0009244	0.105586	0.0651796	0.00114346	-0.00252793	0.0336062	0.00066186	0.00133617	0.000574229	0.310442	0.000398585	0.000884661	8.27335e-05
17	2.5	0.1	10	-2.35946	-0.000631023	-7.29046e-05	0.0877729	-0.000581317	-0.00513559	0.00244143	0.00128086	-0.00515106	0.323709	0.111021	-0.00109901	-0.0177553	0.0256153	-9.08358e-05	0.000203261	-0.000563519	0.137787	0.000321281	4.13176e-05	0.000127866
17	2.5	0.1	10	2.69178	-0.000348728	2.03645e-05	0.10585	-0.000144681	0.00841429	0.0046458	0.00405488	-0.00336859	0.454302	0.371962	-0.00111643	-0.0200568	0.0449593	0.000131538	0.000719537	2.64256e-05	0.220522	-0.000259003	0.000557013	4.62724e-05
17	2.5	0.1	10	-2.62525	-0.000549392	0.000321921	0.0200796	9.98451e-05	-0.0026809	0.0022913	0.00111528	-0.00165284	0.15954	0.068187	-0.00042936	-0.0140224	0.0344725	0.000373534	0.000599975	-7.89004e-05	0.199331	0.000136766	0.000357344	-0.000483959
17	2.5	0.1	10	-0.525156	-0.000459707	3.02722e-05	0.0220831	-0.000335874	-0.00342887	0.00156148	0.00111414	-0.00448314	0.186289	0.0849845	-0.00094956	-0.0167029	0.026295	-5.68797e-05	0.000185453	-0.000546508	0.1285	0.000223521	0.00051677	-0.000129429
17	2.5	0.1	10	3.70917	0.000375886	4.51073e-05	-0.129749	-0.000313138	-0.00106232	0.00328778	0.00300191	-0.00534194	0.441528	0.328361	-0.00198435	-0.0255593	0.0401353	-0.000417227	-3.85871e-05	-0.00113084	0.135651	-0.000320765	0.000238295	-0.000639934
17	2.5	0.1	10	-0.0663342	7.41847e-06	5.89514e-05	-0.0556715	0.000357501	0.0119206	0.00389479	0.00176814	-0.000246987	0.245298	0.112344	-0.000328099	-0.0139755	0.0390497	0.000269199	0.000766297	-7.75176e-05	0.251874	-9.99716e-05	0.00105225	0.000280804
17	2.5	0.1	10	-2.83238	-0.000446382	-8.7953e-06	-0.032	-0.000204297	-0.00438497	0.00221982	0.00100395	-0.00500291	0.288161	0.0761245	-0.00134618	-0.0201123	0.0297491	-0.000121236	-4.14447e-05	-0.000543084	0.0435447	0.000175025	0.000335046	-0.000204613
17	2.5	0.1	10	1.06379	-6.62755e-05	6.06583e-05	0.00913206	0.00017347	0.0138172	0.00184334	0.00136403	-0.00251886	0.14549	0.0954036	-0.000641432	-0.0163397	0.040508	5.63707e-05	0.000485862	-0.000342284	0.203588	-0.00021129	0.000759161	0.000133596
17	2.5	0.1	10	2.1401	-0.000173908	-5.10607e-05	0.0539163	5.06346e-06	0.0105659	0.00232124	0.00117519	-0.00197033	0.171708	0.0749339	-0.000735306	-0.0168062	0.0390471	0.000151152	0.000698836	-0.000431818	0.295181	-0.000223182	0.000514757	6.31985e-07
17	2.5	0.1	10	-2.9287	-0.000428022	0.000232513	-0.0271995	0.000216386	0.00138941	0.00485439	0.00308756	-0.00227202	0.41012	0.24927	-0.000107191	-0.014663	0.055034	0.00015474	0.000397994	0.0025018	-0.0519811	0.000639559	0.000545513	0.000810083
17	2.5	0.1	10	1.34772	-0.000545211	-0.000126318	0.00887076	-0.000295507	-0.00562626	0.00218622	0.00107081	-0.00557486	0.31845	0.0892144	-0.00128205	-0.0195773	0.0292286	-1.39318e-05	5.29745e-05	-0.000881223	0.130397	0.000103197	0.000245017	-0.000348694
17	2.5	0.1	10	1.29643	0.000204975	0.000123076	0.0676023	0.000361504	0.0146359	0.00466444	0.00181637	0.00136894	0.250671	0.104952	0.00085321	-0.00419939	0.0316718	0.000633818	0.00140974	0.000605266	0.324842	0.000592351	0.000780052	0.000299081
17	2.5	0.1	10	1.0379	-0.000633287	-0.000150218	-0.0284244	-0.00015523	-0.0032043	0.00132106	0.000790709	-0.00546827	0.201836	0.0526512	-0.00129082	-0.0197029	0.0297672	2.3144e-05	0.000308857	-0.000443355	0.157637	5.71184e-05	0.000520217	-0.000300136
17	2.5	0.1	10	-1.56916	-0.000408306	9.97085e-06	0.123739	-9.34848e-05	0.0132856	0.0027278	0.00116519	-0.00144773	0.190341	0.0714684	-0.000934728	-0.0202081	0.0590905	0.000239377	0.000613123	0.000442106	0.134823	-0.000285558	0.000154344	5.92759e-05
17	2.5	0.1	10	2.97123	2.66195e-05	0.000127571	-0.0604413	0.000122296	0.000116866	0.00355643	0.00178843	-0.00228508	0.29346	0.132082	-0.000157806	-0.0116932	0.0321744	0.000217629	0.000607778	0.000294114	0.150751	0.000495285	0.000890687	0.000165654
17	2.5	0.1	10	-2.24205	7.63186e-05	6.27685e-05	-0.177612	1.54997e-06	0.000793147	0.00210052	0.00144214	-0.00605202	0.339446	0.144974	-0.00205689	-0.0264098	0.0462747	-0.000425069	-0.000315631	-0.00140009	0.0455181	-0.000330176	0.000397845	-0.000730616
17	2.5	0.1	10	-3.07001	-0.000790222	-7.15121e-05	-0.0298075	-0.000262088	-0.000347551	0.0034632	0.00140205	-0.00352207	0.343853	0.107466	-0.00079133	-0.0161735	0.031098	5.06494e-05	-2.50953e-05	-0.000499859	0.0444009	0.000191718	0.000160911	-0.000200057
17	2.5	0.1	10	-0.898843	-0.000730474	-0.000214447	0.00425103	-0.000523566	-0.00605924	0.000115838	0.000692209	-0.00604594	0.0670965	0.0421207	-0.00117661	-0.0192297	0.0330407	-7.51241e-05	5.53004e-05	-0.00100212	0.153741	3.87831e-05	0.000428759	-0.000430661
17	2.5	0.1	10	3.76716	0.00065211	1.45513e-05	-0.155139	9.49274e-05	0.00121383	0.00121948	0.00103362	-0.00450215	0.148405	0.0760287	-0.00120591	-0.0211532	0.0504857	-0.000340385	0.000216219	-0.000589139	0.146752	-0.000110548	0.00030443	-0.000444997
17	2.5	0.1	10	-0.58407	-0.000770547	-0.000207079	0.10959	-0.00024214	0.000221687	0.00314096	0.0012278	-0.00519827	0.412508	0.105063	-0.000995505	-0.0186382	0.0392523	0.000133472	0.000354764	-0.000417555	0.169938	5.55811e-06	0.000786104	-0.000231344
17	2.5	0.1	10	-0.571275	-0.00053288	-0.000185283	-0.0684252	-8.64229e-05	0.00874614	0.000749379	0.00083306	-0.00571934	0.139507	0.0594384	-0.00135685	-0.0201241	0.0291245	-0.000210642	-2.76209e-05	-0.000949788	0.107414	-0.000535552	3.10564e-05	2.16389e-05
17	2.5	0.1	10	1.04625	0.00016263	-0.000101722	-0.119845	0.000407073	0.000159818	0.00381596	0.00226351	-0.00525511	0.500125	0.233723	-0.00171206	-0.0218831	0.0197662	-3.25429e-05	0.000225368	-0.00146859	0.365278	-0.000656878	0.00071903	-0.000555765
17	2.5	0.1	10	-2.97651	-0.000782767	0.000113111	0.0891466	-0.00025086	0.00173148	0.00467411	0.00200916	-0.00196656	0.378377	0.148209	-0.000560448	-0.0140623	0.0283809	0.000171419	0.000254125	3.87667e-05	0.0762636	0.000317467	0.000135249	0.000126057
17	2.5	0.1	10	3.90722	0.000179462	0.000270342	0.0294405	-5.18861e-06	0.0121471	0.0047224	0.00265519	-0.00185357	0.377068	0.20312	-0.000871765	-0.0187335	0.0478786	0.000150294	0.000783235	0.000343679	0.193861	-6.19793e-05	0.000325112	0.000164265
17	2.5	0.1	10	3.21476	0.000244289	0.000300188	-0.121774	0.000267259	0.00248517	0.00477669	0.00387955	-0.00464346	0.562583	0.404085	-0.0012403	-0.0186032	0.023703	6.65778e-05	0.000620129	0.000271046	0.15712	0.00039727	0.000656653	0.000243647
17	2.5	0.1	10	3.0167	0.000180753	5.69327e-05	-0.00927765	0.000458814	0.0122614	0.00762696	0.00780126	-0.000903037	0.567804	0.602375	-0.000771602	-0.0176164	0.043752	0.000571281	0.000972529	0.000488146	0.226333	-0.000462042	0.000582095	0.000425719
17	2.5	0.1	10	2.30129	0.000540595	0.000266834	-0.027545	0.00130935	0.00798537	0.00141925	0.00102014	0.000129259	0.0496381	0.0541167	0.00123283	0.00212279	0.0185422	0.00116359	0.00122426	0.00172052	0.150991	0.000204289	0.000758644	0.00037633
17	2.5	0.1	10	-3.15114	-0.000486102	0.00018415	0.0472317	9.26379e-06	-0.0026639	0.000771344	0.000749882	-0.00393475	0.0808555	0.042208	-0.000908413	-0.0167826	0.0291796	9.87772e-05	0.00034597	-0.00108961	0.307272	-3.22018e-05	0.000514833	-0.000700615
17	2.5	0.1	10	-3.21805	-0.000692475	3.06044e-05	-0.00283285	8.01832e-06	-0.000263032	0.00514972	0.004224	-0.00525024	0.664486	0.47579	-0.00169727	-0.0255384	0.071241	-5.82341e-05	5.17171e-05	-0.000296201	0.0480209	-0.000407567	0.000284774	-0.000106874
17	2.5	0.1	10	2.93353	1.52213e-05	0.000226663	-0.0807137	-0.00028851	0.00328978	0.00099935	0.000930502	-0.00374464	0.0993989	0.0604872	-0.00083858	-0.0185828	0.0485108	-0.000199771	0.000267248	-0.000177557	0.10585	-0.000108912	0.000334155	-0.000232599
17	2.5	0.1	10	-3.79262	-0.000870135	-0.000230497	-0.0571236	-0.000360424	-0.00908886	3.67232e-05	0.000693193	-0.00812317	0.151066	0.0530218	-0.00215371	-0.0258977	0.026419	-0.000330516	0.000166397	-0.00095904	0.194416	1.93726e-05	0.00040174	-0.00038758
17	2.5	0.1	10	0.291338	-0.000214381	-3.53731e-05	-0.0562436	0.000368639	0.00321624	0.00257508	0.00109748	-0.00347213	0.251235	0.07615	-0.000580128	-0.0152393	0.0354343	-2.0745e-05	6.1544e-05	7.97608e-05	0.0136641	0.000222463	0.00078265	-5.76808e-05
17	2.5	0.1	10	-3.12954	-0.000650388	0.000122886	-0.0434954	-0.000140954	-0.00364605	0.00157553	0.000975484	-0.00515542	0.218244	0.0737829	-0.00139523	-0.0201895	0.0270786	-6.23699e-05	0.000264574	0.00017409	0.0651475	0.00043558	0.000154055	-7.32915e-05
17	2.5	0.1	10	-3.68944	-0.000780047	1.64183e-06	0.0181335	-0.000319242	-0.00673972	0.00245801	0.00131661	-0.00583487	0.37197	0.124507	-0.00174199	-0.0238627	0.0398104	-0.00017479	-0.000154765	-0.00146556	0.148771	-0.000616962	7.88842e-05	-0.000518989
17	2.5	0.1	10	-2.10692	-0.00036806	-0.000181124	-0.0367261	6.65074e-05	-0.00382663	0.00236857	0.00126085	-0.00608717	0.378907	0.120624	-0.00134488	-0.0207533	0.0360391	2.74909e-05	0.00038507	-0.00036897	0.172879	2.89101e-05	0.000395658	-0.000202036
17	2.5	0.1	10	2.94929	0.000531486	0.000289701	-0.0873771	0.00082405	0.0150701	0.00788436	0.00832748	-0.000256146	0.550408	0.613558	-0.000471976	-0.0165509	0.0515531	0.000466024	0.00062167	0.000856435	0.0947972	-0.000138568	0.000378943	0.000376986
17	2.5	0.1	10	-3.34742	-0.000794816	-6.32307e-05	0.0744862	-0.000445223	-0.00363174	0.00209002	0.00105806	-0.00541489	0.296222	0.0861127	-0.00145916	-0.0232134	0.0563024	-0.000138828	8.85971e-06	-0.00111739	0.155457	-0.000481501	-7.84619e-05	-0.000424121
17	2.5	0.1	10	4.12873	0.000951209	0.000339372	-0.0645619	0.0010841	0.0103376	0.00532037	0.00264428	0.00277182	0.253702	0.148509	0.00138858	0.00327521	0.0189013	0.000886723	0.00123164	0.0014966	0.172997	0.000464413	0.00103699	0.000231741
17	2.5	0.1	10	2.24918	-0.000460532	-6.34012e-05	0.0181521	-0.00049699	0.00641008	0.00303151	0.00222703	-0.00636564	0.496278	0.263269	-0.00185406	-0.023253	0.0222722	-0.000194384	-9.76787e-05	-0.00126196	0.133359	-0.000490541	-2.56308e-05	-1.32233e-05
17	2.5	0.1	10	-3.3195	-0.000727467	7.14502e-05	0.161483	-9.54662e-07	-0.00482082	0.00416339	0.00261972	-0.00395678	0.442788	0.241443	-0.00124452	-0.0200618	0.0362429	1.51389e-05	2.66674e-05	-0.000983682	0.137432	-0.000583332	9.81799e-05	-0.000664965
17	2.5	0.1	10	-3.18269	-0.000852988	-7.28398e-05	0.0871903	-0.000752804	-0.00334487	0.00229036	0.00192819	-0.00735711	0.484821	0.254437	-0.00195	-0.026077	0.0528629	-0.000321441	-0.000235006	-0.00157219	0.127992	-0.000513591	0.000114549	-0.000467093
17	2.5	0.1	10	-2.33941	-0.000503823	9.17575e-05	-0.0482385	-0.000662259	0.00078316	0.00191342	0.00112715	-0.00487085	0.244674	0.0897129	-0.00139939	-0.0224896	0.0516376	-0.000295982	-6.28549e-05	-0.0011656	0.130907	-0.000267821	1.26039e-05	-0.000529385
17	2.5	0.1	10	2.12471	-1.66187e-05	0.000154013	-0.0276268	-3.87509e-05	0.00341653	0.00289098	0.00146255	-0.00372979	0.295701	0.115752	-0.000615193	-0.0147031	0.0299131	4.25388e-05	0.000332952	8.80316e-05	0.09472	0.000491797	0.000298694	0.000137344
17	2.5	0.1	10	0.110857	-0.000482864	-9.12221e-05	-0.0228061	-0.000500053	0.00550942	0.00161231	0.00106664	-0.00632911	0.290457	0.096578	-0.00168625	-0.0232927	0.0374661	-0.000286483	-8.66609e-05	-0.000750508	0.0524245	-0.000473335	0.000272424	4.01534e-05
17	2.5	0.1	10	0.737129	-0.000103996	1.12703e-06	-0.0160276	0.000509806	0.0137417	0.00101303	0.000921975	-0.00227899	0.0633549	0.0537173	-0.000280153	-0.0174542	0.0708983	0.00022143	0.000463592	0.000575423	0.08098	-0.000354437	0.000608558	0.000113461
17	2.5	0.1	10	-0.054209	-0.000499116	0.000382804	-0.0940132	0.000312124	-0.00248129	0.00343402	0.00238086	-0.00457048	0.403367	0.230046	-0.00155829	-0.0212181	0.0250402	-0.000255046	-0.000334018	0.000660125	-0.131909	0.000460155	-0.000145274	0.000257803
17	2.5	0.1	10	2.89826	0.00085896	0.000358038	-0.0310515	0.000961023	0.0263315	0.0047609	0.00237289	0.00449873	0.180174	0.120397	0.00281931	0.00166714	0.0637485	0.000593586	0.000387392	0.00267579	-0.060511	-1.35431e-05	0.000580225	0.000430411
17	2.5	0.1	10	0.992513	0.000158137	0.000138129	0.362864	0.000306986	-0.00449073	0.0025734	0.00114735	-0.00393772	0.272502	0.0844679	-0.000816883	-0.0162191	0.0300487	0.000145541	0.00073244	-0.000826559	0.403715	1.00831e-05	0.000785281	-0.000454573
17	2.5	0.1	10	-1.80633	-0.000177617	0.00043196	-0.0362841	0.000650392	0.0056268	0.00586089	0.00429307	0.00095061	0.347029	0.28083	-0.000176598	-0.000707221	-0.0126805	0.000569483	0.00140157	0.00109838	0.253983	0.000521578	0.000992356	0.000187299
17	2.5	0.1	10	2.7934	0.00021444	-6.42297e-05	-0.0891273	0.00062952	0.0161833	0.00673245	0.00582262	-0.00161921	0.537318	0.469494	-0.000837392	-0.0146663	0.0185576	0.000312612	0.000914495	-0.000147717	0.312075	-0.000173912	0.000538333	-0.000155562
17	2.5	0.1	10	0.7638	-0.000670247	-0.000205261	0.00801747	-0.000300699	0.00814518	0.00489385	0.0049424	-0.00499325	0.6078	0.547636	-0.00168398	-0.0241913	0.0498804	-4.79521e-05	0.00025477	-0.000861537	0.21217	-0.000509494	0.000341443	3.80376e-05
17	2.5	0.1	10	-1.34779	-0.000594135	-0.00033395	-0.00250005	-0.000409484	0.00523537	0.00122213	0.00108476	-0.0076583	0.332291	0.118787	-0.0019328	-0.0253675	0.0426897	-0.000293193	-5.95766e-06	-0.00122467	0.171394	-0.000654335	0.000429554	-0.000202035
17	2.5	0.1	10	3.84989	0.000777289	0.000226868	-0.0390366	0.000387149	0.0194858	0.00493221	0.00347978	-0.000845459	0.348758	0.253934	0.000365884	-0.00944278	0.040716	0.000503302	0.000675965	0.000722006	0.121303	-6.25828e-05	0.000295657	0.000633048
17	2.5	0.1	10	-3.27686	-0.000732794	0.000237628	0.0703755	0.000177004	0.0102414	0.00477553	0.0026382	-0.0040249	0.513036	0.24508	-0.00125025	-0.0232541	0.0751765	0.000170762	0.000374839	0.000313354	0.0826754	-0.000356653	-4.67345e-05	0.000225217
17	2.5	0.1	10	-1.80074	8.85016e-05	0.000256225	-0.0325258	-0.000212028	0.00527575	0.000935952	0.000896895	-0.00519415	0.141677	0.0644193	-0.00144051	-0.0227137	0.0511307	-0.000365498	-0.000204747	-0.000960166	0.0311649	-0.000172929	0.000335899	-0.0003744
17	2.5	0.1	10	2.68048	-5.98502e-06	0.000329533	-0.0177907	6.25353e-05	0.0185175	0.00709376	0.00877537	-0.0024023	0.621819	0.771846	-0.000920263	-0.0185147	0.042809	0.000217337	0.000491863	0.00057349	0.088596	-0.000275039	0.000386962	0.000724286
17	2.5	0.1	10	1.29216	0.000583637	0.000225943	0.0378942	0.000558728	0.00932166	0.00600559	0.00340846	0.00178992	0.327248	0.20765	0.00142807	-0.00274377	0.0434563	0.000695067	0.000920933	0.00136795	0.118118	0.000778967	0.000971801	0.000588235
17	2.5	0.1	10	2.48278	-0.000373919	-0.000211474	-0.0195859	-3.42479e-05	-0.00265316	0.00360297	0.00160296	-0.00494713	0.449743	0.14705	-0.00117789	-0.0198858	0.0390713	0.000115507	0.000397432	-0.000612999	0.219883	5.75441e-05	0.000449704	-0.000156206
17	2.5	0.1	10	-2.49259	-0.000400451	-0.000145345	0.0926475	0.000197893	0.01027	0.00118196	0.000858473	-0.00297591	0.0961428	0.0501824	-0.00102835	-0.0206486	0.0575623	9.7304e-05	0.000510018	-0.000523024	0.244835	-0.000218398	0.000672721	0.000276937
17	2.5	0.1	10	4.45679	0.000233709	0.000646931	0.0250207	0.000868792	-0.0101573	0.00216339	0.00127023	-0.00623995	0.362091	0.124212	-0.00142967	-0.0218189	0.0411177	-5.29697e-05	-2.35022e-05	-0.00109864	0.13644	-6.44121e-05	0.000438821	-0.000423937
17	2.5	0.1	10	4.56843	0.00228322	0.00121373	0.0872968	0.00100938	0.0123158	0.00816582	0.00697848	0.0016078	0.477923	0.44875	0.000223921	-0.0107704	0.0428586	0.000594298	0.00128672	0.00182427	0.154488	0.000641345	0.00067367	0.000434518
17	2.5	0.1	10	-2.19167	-0.0003509	0.000347319	-0.0565526	0.000404749	0.010331	0.00491113	0.00176038	4.35359e-05	0.311936	0.109656	-0.000206641	-0.0126044	0.0356168	0.000205085	0.000700086	0.00130912	0.0746353	0.000708278	0.000838743	0.000373336
17	2.5	0.1	10	2.2932	-6.10937e-05	0.000137877	0.0160296	0.000610273	0.0206807	0.00817043	0.00810358	0.000856781	0.51315	0.5509	-0.000193731	-0.0105939	0.0244289	0.000546491	0.00101831	0.000191779	0.283614	-6.95633e-06	0.000382316	0.000254695
17	2.5	0.1	10	4.07963	0.000329424	0.000305464	0.00650725	-8.24867e-05	0.0109671	0.00469967	0.00301022	-0.00254006	0.410491	0.247919	-0.00112512	-0.0204879	0.0488995	5.82247e-05	0.000673988	0.000211808	0.1803	-3.41774e-05	0.000149029	-1.86586e-05
17	2.5	0.1	10	-1.42426	-0.000184314	-0.000156178	-0.00945127	0.000353317	0.00888416	0.00239279	0.0010014	-0.00331912	0.22644	0.0656368	-0.00109737	-0.0215694	0.063704	-6.39385e-05	0.0003501	-0.000681233	0.214712	-0.000339534	0.000748118	6.18229e-05
17	2.5	0.1	10	-1.59452	-4.65363e-06	0.000145006	0.0263583	0.000121687	-0.000853499	0.00312181	0.00133556	-0.00228712	0.254242	0.0911485	-0.000135472	-0.0112787	0.0307024	0.000194159	0.000414469	-0.000323793	0.175945	0.000183787	0.000882385	-0.000324098
17	2.5	0.1	10	-1.68357	-0.000284251	0.000357728	0.0266421	0.000613834	0.0117043	0.00271532	0.00183225	0.00281534	0.0913267	0.0979008	0.00127585	-0.00224027	0.0364607	0.000677006	0.00133225	0.00184598	0.161598	0.000842398	0.000986225	0.000540521
17	2.5	0.1	10	-2.29993	-0.000514238	9.30655e-05	0.0980557	-0.000624996	0.00538344	0.00233913	0.00119825	-0.0027418	0.199136	0.0814555	-0.000627989	-0.0187384	0.0632263	-0.00027315	-4.28366e-05	-0.000175006	0.00403833	-2.71383e-05	0.000215316	-0.000232706
17	2.5	0.1	10	2.29959	2.66144e-05	0.00012247	0.00532607	0.000334212	0.015671	0.00583874	0.00282226	-0.000966097	0.427165	0.203144	-0.000794773	-0.014072	0.0170677	0.000254251	0.000765771	-0.000137636	0.262055	-0.000147197	0.000327591	-0.000181744
17	2.5	0.1	10	0.729419	-0.000197794	-0.000153934	0.12476	0.000378174	0.0251181	0.00473874	0.00162444	-0.000518986	0.320163	0.1032	0.000478215	-0.013555	0.0743726	0.000642254	0.000780625	0.00066323	0.15425	-0.000471448	0.000377793	0.000311441
17	2.5	0.1	10	2.43952	0.000109146	0.000164656	-0.102683	-2.55115e-05	0.00172036	0.00124679	0.00115278	-0.0059764	0.218232	0.104373	-0.00162465	-0.0230525	0.039827	-0.000260611	0.000120486	-0.000447184	0.0905573	-0.000259698	0.000120572	-9.81995e-05
17	2.5	0.1	10	-2.90821	-0.000643183	0.000116231	0.108128	5.0791e-05	0.00385142	0.00167949	0.000795238	-0.00535553	0.241284	0.0526895	-0.00176928	-0.0248121	0.0509686	9.10597e-05	0.000656358	-0.000881793	0.387414	-0.000523122	0.000289114	-0.000307724
17	2.5	0.1	10	2.44488	0.000436466	6.47322e-05	-0.138589	0.00133592	-0.000224427	0.000352129	0.0010321	-0.00356587	0.0280684	0.0700487	0.000242973	-0.00876319	0.0321549	0.000632795	0.000638747	0.00203922	0.013776	0.000180536	0.000119972	0.000120137
17	2.5	0.1	10	-2.0119	-0.000573248	-0.000314915	-0.082826	-0.000568772	0.00165842	0.000608029	0.000848813	-0.00761717	0.221381	0.0768498	-0.00194465	-0.0249628	0.0353195	-0.000341473	6.33811e-07	-0.00124131	0.17849	-0.00057795	9.84935e-05	-0.000245829
17	2.5	0.1	10	0.628198	-0.000412199	-0.000184666	-0.00363144	-0.000370896	0.00592636	0.000548506	0.000727974	-0.00506328	0.0897765	0.0432441	-0.00167726	-0.0239581	0.0471411	-0.000247313	7.15255e-07	-0.00140864	0.220702	-0.000444108	0.000287233	-0.000348164
17	2.5	0.1	10	-1.24749	0.000323994	0.000252178	-0.041442	0.000519897	0.00751241	0.000405057	0.000918594	0.000127238	-0.0256081	0.0465853	0.000939343	-0.00343819	0.0311039	0.000508109	0.00104696	0.00072873	0.214327	0.000634546	0.000849862	0.000152625
17	2.5	0.1	10	-2.59709	-0.000286968	0.000168118	-0.0605622	0.000208378	0.00194172	0.00328588	0.00145292	-0.00226067	0.268003	0.101555	-0.000382044	-0.0129656	0.0298719	-6.39299e-05	0.000149108	0.000198329	0.0290266	0.000574085	0.000276658	8.24515e-05
17	2.5	0.1	10	-0.912148	-0.000147173	4.9738e-06	0.011719	-0.000278813	0.0020981	0.000622308	0.000847321	-0.0042932	0.0748023	0.0540426	-0.000989895	-0.0202909	0.0561972	-0.000391155	-0.000113854	-0.000428818	0.00447723	-7.16997e-05	0.000290122	-0.000323359
17	2.5	0.1	10	2.08533	-0.000199175	-6.76079e-05	-0.0390825	3.55912e-05	0.0142098	0.00581289	0.0060697	-0.00353554	0.584112	0.583434	-0.00133164	-0.0214918	0.044935	9.95646e-05	0.000277445	-0.000178095	0.109259	-0.000488343	0.000340359	0.000274969
17	2.5	0.1	10	1.39874	-5.41087e-05	0.000153657	-0.113356	0.000251004	0.00146645	0.00143264	0.00100996	-0.00476932	0.183558	0.0751654	-0.000973957	-0.0159416	0.0196641	-0.000182341	0.000135615	0.000208024	0.0242292	0.000272138	0.000800492	0.000135755
17	2.5	0.1	10	-2.44458	0.000116667	0.000120136	-0.0547543	1.14704e-06	-0.00507203	0.00324025	0.00170429	-0.00350584	0.320325	0.138033	-0.00109948	-0.0168365	0.0188702	-0.000119342	0.000179235	-0.000446362	0.11155	0.000243491	0.000372416	4.39714e-05
17	2.5	0.1	10	3.26821	0.000188205	3.23441e-05	-0.075784	0.00021333	0.0184522	0.00606418	0.00742074	-0.00286137	0.558811	0.675765	-0.00118774	-0.0193091	0.0330294	0.000131374	0.000458886	0.000259286	0.112389	-0.000340422	0.000255187	0.00055808
17	2.5	0.1	10	3.34892	0.000214872	0.000214141	-0.0413389	0.000332585	0.00305944	0.00445952	0.00356832	-0.00168215	0.34631	0.278653	-0.000429031	-0.0108437	0.0159082	0.000158759	0.00040396	0.000453825	0.0767285	0.000614564	0.000278581	0.000616564
17	2.5	0.1	10	-0.806162	8.16295e-05	4.23777e-05	-0.163868	-0.000232601	-0.00169594	0.00414031	0.00360582	-0.00407346	0.448163	0.35065	-0.00173738	-0.0243849	0.0476004	-0.000389761	0.0001138	-0.000885922	0.157165	-0.000249665	0.000532518	-0.000448972
17	2.5	0.1	10	-4.06926	-0.000851716	-4.83823e-05	0.0334496	-0.000332522	-0.00551603	0.00330304	0.00161555	-0.00569393	0.472212	0.161566	-0.00143205	-0.0202521	0.0250979	-0.000139574	-0.000191808	-0.00147967	0.131072	-0.000704126	-4.97355e-05	-0.000593094
17	2.5	0.1	10	-3.14348	-0.000511087	0.000103853	0.0609545	0.000121038	0.00542696	0.00161687	0.000786735	-0.0049393	0.212869	0.049821	-0.0016051	-0.023541	0.0479312	0.000146277	0.00070634	-0.000616234	0.338672	-0.000506435	4.92899e-05	-0.000249997
17	2.5	0.1	10	2.34688	-4.77605e-05	0.000150245	-0.0467559	-6.5365e-05	-0.00502879	0.00393565	0.00295384	-0.00503172	0.496191	0.310891	-0.00126211	-0.0190339	0.0258471	5.89378e-05	0.000362703	-0.000484037	0.183735	0.000243566	0.000608114	6.11974e-05
17	2.5	0.1	10	-0.251743	-0.000448838	-0.000200333	-0.00815311	-0.000308381	0.00808139	0.00196386	0.00122439	-0.00600443	0.317448	0.114469	-0.00174541	-0.022649	0.024927	-0.000107682	0.000119832	-0.000740919	0.13409	-0.000493455	0.000350135	9.69925e-05
17	2.5	0.1	10	-2.93349	-0.000558224	2.45128e-05	-0.0775289	-0.000563483	0.000613782	0.00199774	0.00143173	-0.00460896	0.241533	0.122344	-0.00167187	-0.0237853	0.0452235	-0.000508603	-0.000231304	-0.00111678	0.0417019	-0.000282277	0.000215819	-0.000617086
17	2.5	0.1	10	1.92409	-0.00042777	-0.000100072	0.00853334	-0.0003072	-0.00216616	0.00317686	0.00154666	-0.00424478	0.354154	0.130686	-0.00123931	-0.0184533	0.0225763	6.02542e-05	0.00070791	-0.000438264	0.299761	0.000177049	0.000548974	-3.52017e-05
17	2.5	0.1	10	-3.24771	-0.000628602	2.76532e-06	-0.0222018	-9.40271e-06	0.00871524	0.00448368	0.00391479	-0.00521604	0.578989	0.435813	-0.00191754	-0.0247657	0.035268	-0.000115246	0.000243459	-0.000476493	0.139162	-0.000396936	0.00015694	0.000262874
17	2.5	0.1	10	2.2672	7.82473e-05	0.000101924	-0.0424913	-7.44735e-05	0.00286915	0.00436802	0.005578	-0.0055863	0.600402	0.670258	-0.0019329	-0.0262296	0.0577389	-0.000175897	-0.000111239	-0.000931732	0.0679882	-0.000379321	8.35944e-05	-0.000248187
17	2.5	0.1	10	-2.59274	0.000185756	0.000130801	-0.114208	0.000185367	-0.00685228	0.00362881	0.00291702	-0.00505395	0.460999	0.307244	-0.00124217	-0.018419	0.0221311	-0.000237569	8.30879e-05	-0.000684789	0.110511	0.000226192	0.000359756	-0.000431583
17	2.5	0.1	10	-3.0765	-0.000557043	0.000171804	0.105902	-0.000483916	0.0015079	0.00181937	0.00107703	-0.00389641	0.19071	0.0767233	-0.00199351	-0.0270487	0.0672546	-0.000476437	-7.24645e-05	0.000311099	-0.0433986	-1.79216e-05	-0.000106796	7.90074e-05
17	2.5	0.1	10	1.89375	-0.000492619	-0.000214819	0.0581131	-0.000266023	0.0076675	0.00327323	0.00164696	-0.005005	0.41459	0.15324	-0.00125374	-0.0214276	0.0500914	6.35443e-05	0.000278061	-0.000788135	0.206896	-0.000617231	0.000234775	-3.60435e-05
17	2.5	0.1	10	-2.50935	-0.000382804	0.000340531	-0.0058639	-0.000192025	0.0011563	0.00466087	0.00195904	-0.00264881	0.412888	0.152008	-0.000687085	-0.0153909	0.0309893	-0.000197576	-7.96035e-05	-6.74761e-05	-0.0172634	0.000606881	0.000259393	3.96752e-05
17	2.5	0.1	10	3.81892	-0.000156062	-6.89818e-05	-0.0474723	-0.00049458	0.0127065	0.00445311	0.00329487	-0.0021555	0.36809	0.26536	-0.00103881	-0.0183301	0.0338867	-0.000134034	0.000372407	-0.000312048	0.159695	-5.49724e-05	7.94266e-05	8.38086e-05
17	2.5	0.1	10	1.00805	9.43316e-06	1.98393e-05	-0.0489862	-0.000149886	0.0171876	0.00665294	0.0022162	0.00156663	0.378288	0.130576	-0.0016132	-0.0224139	0.0332262	-9.38766e-05	0.000339957	-0.000222366	0.135779	-0.000101705	0.000113753	9.32985e-06
17	2.5	0.1	10	3.24832	0.000354267	-3.67042e-05	-0.130263	-0.000158469	0.014326	0.00317402	0.00247294	-0.00321686	0.29945	0.210422	-0.0015444	-0.0230415	0.046592	-0.000452742	-0.00029072	-3.80563e-05	-0.0858234	-0.00010007	0.000344486	0.000162144
17	2.5	0.1	10	-2.95218	-0.000410805	0.000244856	0.0844876	-0.000258311	0.013927	0.00323893	0.0017232	-0.00286527	0.28949	0.132329	-0.00118728	-0.0233291	0.0819191	-0.000184532	0.000318168	0.000704084	0.0321937	3.39976e-05	-3.87697e-05	0.000360004
17	2.5	0.1	10	3.78776	0.000940469	0.000417383	-0.0111755	0.000284612	0.022369	0.00505052	0.00300136	0.00284987	0.234939	0.169916	0.000808744	-0.00823952	0.0508477	0.000428479	0.000617188	0.00206653	0.00818788	0.000204724	0.000231798	0.000510453
17	2.5	0.1	10	7.43082	0.00107376	0.000412341	-0.0687404	0.000870682	0.0162262	0.00287378	0.0014949	0.00406632	0.0807843	0.0725828	0.0015736	-0.000950531	0.0398886	0.000695676	0.00133634	0.00171882	0.173786	0.000856751	0.000521606	0.000759709
17	2.5	0.1	10	-2.2385	-0.000699049	-0.00017456	0.0710489	-0.00034539	0.00690526	0.00322744	0.00209481	-0.0052134	0.42425	0.211855	-0.00137127	-0.0211824	0.0385619	1.44911e-05	0.00026645	-0.000219921	0.111024	-0.000408174	1.23329e-05	0.00030539
17	2.5	0.1	10	0.810266	-7.49802e-05	0.00017098	-0.00677175	0.000203765	0.00218554	0.00321857	0.00168605	-0.00230353	0.263654	0.123005	-0.000538698	-0.0144355	0.0319122	0.00029623	0.000543243	4.04593e-05	0.164472	0.000322177	0.00095301	0.000271619
17	2.5	0.1	10	-0.925594	-0.000251072	-6.45818e-05	-0.0369984	-0.000153078	-0.00164971	0.00419465	0.00188227	-0.00334619	0.407757	0.153872	-0.00173238	-0.0222072	0.0213738	-0.000206767	-3.76602e-05	-0.0013722	0.190219	-0.000658441	0.000308685	-0.000455062
17	2.5	0.1	10	-2.54922	-0.000416216	0.000352972	0.00505887	-7.13645e-05	-0.00240979	0.000749283	0.00132248	-0.0032733	0.0613973	0.0972864	-0.00111154	-0.0172998	0.0214738	-4.35474e-05	0.000116896	-0.000649157	0.118209	0.000289283	0.000542689	-0.000294528
17	2.5	0.1	10	-1.112	-0.000613632	-0.000279174	0.0172439	-0.000344255	-0.00835195	0.00202016	0.00104264	-0.00687197	0.393096	0.0996961	-0.00201385	-0.0256621	0.038514	-0.000198299	0.000185843	-0.0010197	0.216246	-3.50159e-05	0.000616396	-0.000359783
17	2.5	0.1	10	3.57027	0.000312864	0.000155992	0.0527119	5.63623e-05	0.0200453	-2.48192e-05	0.000943857	0.0027867	-0.0780506	0.0429758	0.0010687	-0.0070948	0.0538141	0.000356538	0.000712041	0.00129248	0.0785851	0.000206906	0.000324632	0.000234663
17	2.5	0.1	10	-1.07999	-0.000315365	-6.54979e-05	-0.026558	-0.00036886	-0.0048956	0.000138847	0.000722851	-0.00522709	0.0447973	0.0431791	-0.00091067	-0.0165841	0.0275843	-0.000104815	0.000373698	-6.60322e-05	0.125871	0.000420934	0.000681297	-5.96763e-05
17	2.5	0.1	10	-0.851697	-0.000340152	-1.56688e-05	0.119911	2.46678e-05	0.00832266	0.00107304	0.000961218	-0.00214878	0.0658606	0.0567743	-0.000813386	-0.0194659	0.0590716	0.000121045	0.000459781	-0.000618393	0.244787	-0.000421134	0.000704934	-9.64801e-05
17	2.5	0.1	10	-0.477468	-0.000137007	6.03292e-06	-0.0853363	-0.000198443	-0.00561299	0.00320188	0.00194618	-0.0053778	0.433553	0.197258	-0.00140841	-0.0204042	0.0281397	-9.6693e-05	0.000293859	-0.000121035	0.107384	0.00059739	0.000929732	0.000327372
17	2.5	0.1	10	-3.64942	-0.000475754	5.40859e-05	0.172046	-1.83498e-05	0.00653082	0.00186623	0.000948383	-0.00504263	0.24782	0.0697226	-0.00174766	-0.0247217	0.0517259	8.11052e-05	0.000855781	-0.000442043	0.35358	-0.000451438	0.000275987	-0.000179747
17	2.5	0.1	10	1.46866	5.61219e-05	1.51484e-05	-0.143485	-6.63343e-05	0.0062011	0.00343487	0.00457913	-0.00645093	0.56318	0.607524	-0.00214533	-0.0273106	0.0527482	-0.000315083	-3.7089e-05	-0.00142359	0.203928	-0.000302704	0.000208868	-0.000198425
17	2.5	0.1	10	-0.991456	0.00142283	0.000576493	0.0799084	0.000508844	0.0051077	0.00554575	0.00319007	-0.00313653	0.527995	0.279136	-0.00130668	-0.0230636	0.0673604	0.000328882	0.00104705	-3.83198e-05	0.333291	-0.000389537	0.000685514	0.000169317
17	2.5	0.1	10	-3.04586	-0.000367094	7.94231e-05	-0.16824	-0.000137644	0.00295355	0.00118531	0.00102063	-0.00507464	0.16715	0.0786701	-0.000410513	-0.0205043	0.0995229	-0.000127779	0.000378937	0.00109963	0.0176537	5.95146e-06	0.000406164	0.000284378
17	2.5	0.1	10	0.118278	0.00106418	0.000146283	-0.136541	0.00170121	-0.0136804	-0.0011294	0.000743754	0.00022457	-0.139813	0.0334753	0.000126413	0.00846824	-0.0252465	0.000518213	0.00127706	0.00209231	0.130762	0.000361775	0.000241687	-0.000161699
17	2.5	0.1	10	3.2079	0.0016753	0.000448124	-0.146365	0.000982384	0.00229992	0.00182556	0.0011437	-0.00103226	0.104497	0.067824	0.000288524	-0.00676368	0.0239755	7.06216e-05	-0.000189177	0.00186072	-0.138525	0.000568238	0.000520939	0.00147072
17	2.5	0.1	10	-2.92992	-0.000776174	-0.000213122	0.0474852	-0.000568247	-0.00101649	0.00292527	0.00188942	-0.00522756	0.388082	0.186895	-0.00159995	-0.0231103	0.0426873	-0.000156797	-2.91777e-05	-0.00131331	0.180182	-0.00072931	0.000395444	-0.000245881
17	2.5	0.1	10	2.36432	-0.000118914	-0.000148683	0.0341095	-5.36848e-05	0.00475083	0.00213379	0.00100253	-0.0035077	0.207942	0.0667183	-0.000456705	-0.0153995	0.043005	0.000180714	0.000194842	-0.00082902	0.180541	-0.000434023	0.000241909	-0.000155553
17	2.5	0.1	10	-1.12836	-0.000346379	-3.29404e-05	-0.120273	-8.42166e-05	0.0145605	0.00361397	0.00229498	-0.00370392	0.369411	0.201826	-0.00145954	-0.0230736	0.0543283	-0.000125577	-7.60729e-05	-0.00046121	0.0214555	-0.000437405	7.84496e-05	-6.91548e-05
17	2.5	0.1	10	1.55485	-0.000403459	-0.000202155	-0.15927	-0.00038046	0.00571071	0.00364042	0.0044951	-0.00699419	0.659297	0.644962	-0.00197359	-0.0242963	0.0235287	-0.000185685	-7.50956e-05	-0.00108035	0.108895	-0.000465481	0.000181201	-5.59947e-05
17	2.5	0.1	10	-3.3986	-0.000529903	0.000144856	0.086388	-0.000172342	0.0103319	0.00192273	0.00132055	-0.0010327	0.112399	0.0821903	-0.000808544	-0.0201706	0.0673694	-8.55481e-05	0.000436241	0.000768695	0.0566651	7.77259e-05	-4.65468e-05	0.000396431
17	2.5	0.1	10	-2.33144	-0.000159751	0.000426359	0.000652584	4.73847e-05	0.0111669	0.00526643	0.00234743	0.00107001	0.301407	0.143655	0.000451523	-0.00879139	0.0403629	0.000363242	0.00091577	0.00163034	0.0955323	0.000788016	0.000284645	0.000532223
17	2.5	0.1	10	4.38066	0.000915441	0.000354396	-0.0753976	0.000758393	0.0101641	0.00778467	0.0101776	0.000309754	0.51275	0.724254	0.000387093	-0.00724533	0.029831	0.000351376	0.00064196	0.000468901	0.139609	0.000434361	0.000469425	9.82631e-05
17	2.5	0.1	10	0.502255	-0.000322826	-0.000118901	-0.0468709	-0.000239739	-0.00509767	0.00224736	0.00156761	-0.00576358	0.338974	0.156587	-0.00112891	-0.0198461	0.0419898	-7.73071e-05	0.000410987	-0.000362988	0.180972	0.00023009	0.00116901	-6.83254e-05
17	2.5	0.1	10	3.70224	-1.74427e-05	-3.70984e-05	-0.12976	-0.00029699	0.0129337	0.00522257	0.00477807	-0.0024451	0.453302	0.408084	-0.00126025	-0.0212216	0.0472349	-0.000159029	0.000154747	0.000146132	0.0354833	-2.12842e-05	6.57487e-05	0.000154689
17	2.5	0.1	10	2.45381	0.00096774	0.000209115	-0.0671861	0.00091075	0.00699832	0.00447177	0.00240987	-0.00108129	0.321421	0.171281	0.000599418	-0.00676469	0.0351211	0.000466083	0.00115412	0.00125676	0.179968	0.000445902	0.00100609	0.000644161
17	2.5	0.1	10	1.91692	6.71306e-05	-0.000107187	-0.0712304	0.000221506	-0.00130497	0.00142407	0.000991056	-0.0037949	0.145354	0.0670664	-0.000696638	-0.0156556	0.032377	0.000128706	0.00060981	0.000333982	0.146496	0.000179051	0.00060183	9.04478e-05
17	2.5	0.1	10	-2.7417	-0.000388441	0.000341741	-0.0254759	-0.000264213	0.0075832	0.00162063	0.000950034	-0.00122561	0.0921586	0.052684	-5.72167e-05	-0.015182	0.0618546	-9.95125e-05	-2.78074e-05	0.000717096	-0.0564828	4.16538e-05	-0.000185891	2.44341e-05
17	2.5	0.1	10	2.63398	0.000206756	-3.34044e-05	0.0239205	-6.86896e-05	0.0037255	0.00192208	0.00124957	-0.00425627	0.21677	0.0981438	-0.000848426	-0.0176606	0.0396209	-2.0386e-05	0.000199115	-0.000541961	0.13289	-0.000347639	0.000300017	-1.8069e-05
17	2.5	0.1	10	2.58108	0.000226547	-7.22448e-05	-0.0790259	0.000394239	0.00189496	0.00532427	0.00508718	-0.00351269	0.532635	0.482184	-0.000893276	-0.0179369	0.0393251	0.000216149	0.000705575	3.91649e-05	0.214298	0.000106093	0.000505108	4.56887e-05
17	2.5	0.1	10	2.26992	0.000928687	0.000371399	-0.0746334	0.000751985	0.00100664	0.00270239	0.00125442	-0.00257316	0.226891	0.0856321	-0.000796353	-0.016059	0.0299923	0.000249324	0.000994705	7.90088e-05	0.295708	0.000177862	0.000452715	-0.00016673
17	2.5	0.1	10	2.40972	0.000659457	0.000335235	-0.0533968	0.000423478	-2.95344e-06	0.000879732	0.000941316	-0.0018479	0.0425586	0.053955	-0.000123418	-0.0108346	0.028684	0.000344889	0.000675491	-0.000310723	0.263304	0.000100082	0.000672803	-0.000224884
17	2.5	0.1	10	-2.15046	-0.000352095	7.74582e-06	0.109098	0.000198377	0.0167261	0.00267839	0.00116386	-0.000682206	0.163924	0.0679614	-0.000188821	-0.0157457	0.0598638	0.00038175	0.00105364	0.000113271	0.307428	-0.000307628	0.000661964	0.000223043
17	2.5	0.1	10	3.98211	0.00153152	0.000418237	-0.121409	0.00136207	0.0162909	0.00122322	0.00216251	0.00298406	-0.00287622	0.117272	0.00192717	0.00848004	0.016464	0.000831938	0.00115849	0.0016504	0.143716	0.000706836	0.000469348	0.000584821
17	2.5	0.1	10	-1.83316	-0.000486774	0.000127046	0.0368486	-0.00022869	-0.000711922	0.00198606	0.00114621	-0.00606191	0.324439	0.104518	-0.00189242	-0.0221082	0.00764011	-0.000153773	0.000231422	-0.00170381	0.468766	-0.000460956	0.000277388	-0.000467984
17	2.5	0.1	10	-0.471987	2.93273e-05	-4.90871e-05	-0.128633	-0.000240279	0.0149411	0.00241481	0.00129934	-0.00134093	0.160954	0.0821435	-0.00100802	-0.0198125	0.0497946	-0.000269279	-4.46774e-05	-0.000300272	0.0155793	-0.000170195	0.000400193	-4.16392e-05
17	2.5	0.1	10	0.379079	0.000103925	0.000205919	0.0627138	-0.000179416	0.0176208	0.00191528	0.00135908	0.00112112	0.0680409	0.0748782	-2.61237e-05	-0.0151382	0.063073	-8.73795e-05	2.20596e-05	0.00038839	-0.0223443	6.84998e-05	0.000190889	9.84202e-05
17	2.5	0.1	10	-1.01496	-4.33188e-05	0.000138053	0.104153	0.000480902	0.00919755	0.00328098	0.00133616	-0.00169795	0.245837	0.0873569	-0.00078373	-0.019859	0.0654226	0.000508411	0.0015945	0.000776623	0.345058	-0.000242059	0.000613356	0.000305805
17	2.5	0.1	10	3.20759	6.58885e-05	-7.94388e-06	-0.0627516	-0.00016391	0.00877637	0.00372625	0.00249076	-0.00383839	0.389023	0.225061	-0.00178805	-0.0243897	0.0427418	-0.000108918	0.00031447	-3.15432e-05	0.102972	-0.000109559	0.000137341	0.000460019
17	2.5	0.1	10	1.72919	0.000120257	1.48212e-05	-0.0279676	0.000168954	0.00328067	0.00266158	0.00158872	-0.00395573	0.282765	0.13161	-0.000447519	-0.0138442	0.0324087	0.000145531	0.000901728	0.000721098	0.178529	0.000383623	0.000683011	0.000236411
17	2.5	0.1	10	-2.47223	0.000506627	0.000398538	-0.00861457	0.00060262	0.0154545	0.0074591	0.00473611	0.00346913	0.36283	0.267391	0.00103634	-0.00666976	0.050251	0.000434814	0.000763323	0.0022165	0.0270661	0.000842322	0.000513698	0.000717971
17	2.5	0.1	10	3.25927	2.91709e-05	-3.2534e-05	-0.0479435	-0.000291768	0.0166642	0.00494086	0.00314219	-0.000741223	0.345055	0.225174	-0.00142923	-0.0218423	0.0414179	-4.54414e-05	0.000327012	0.00054248	0.0479364	6.43253e-06	9.85071e-05	0.000181885
17	2.5	0.1	10	2.41355	0.000107569	0.00015669	0.0312168	-4.03655e-05	0.0119877	0.00654606	0.00744856	-0.00344343	0.651032	0.717406	-0.00112439	-0.0209973	0.0546773	0.000170757	0.000575178	-0.000360555	0.237794	-0.000483194	-2.71361e-05	0.000108598
17	2.5	0.1	10	4.30909	0.000566309	0.000345454	-0.0252119	0.00054219	0.0193686	0.0070817	0.00342918	0.00472713	0.304015	0.177517	0.000832972	-0.00858657	0.0538473	0.000435864	0.00098706	0.0023026	0.0627155	0.000863507	0.000648214	0.000810022
17	2.5	0.1	10	-3.96929	-0.00076275	-0.00010973	-0.0171821	-0.000309248	-0.0039986	0.00159713	0.000860289	-0.00648365	0.298887	0.0683359	-0.00188413	-0.0234406	0.0217172	-0.00030891	-0.000138595	-0.00145839	0.156159	-0.000706131	0.000114151	-0.000407534
17	2.5	0.1	10	-2.00006	-0.000329669	-5.71209e-05	-0.039809	9.84371e-05	0.00217949	0.00286696	0.00118025	-0.00324604	0.270436	0.0829819	-0.000916411	-0.0169002	0.0296161	5.90046e-05	0.000566846	6.14052e-05	0.16881	0.00024966	0.000832205	0.000152467
17	2.5	0.1	10	3.48194	0.000762314	0.000138909	-0.0969958	0.000335214	0.0202473	0.00468449	0.00261218	-0.000685696	0.322491	0.182385	-0.00129233	-0.0239783	0.0834301	-0.000140945	0.000460126	0.000921713	0.0499881	0.000162407	2.90042e-05	0.000158997
17	2.5	0.1	10	1.19844	-0.000105508	4.64021e-05	-0.0137711	0.000352148	0.0140202	0.00192843	0.000900485	-0.00308212	0.171758	0.0546382	-0.00085579	-0.0192652	0.0541842	0.000307298	0.000848985	-0.000345779	0.33006	-0.00041715	0.000403578	-6.19723e-05
17	2.5	0.1	10	-4.03071	-0.000702076	-8.51455e-05	0.0937763	-0.000153196	0.00440873	0.00384011	0.00149036	-0.00373436	0.394689	0.118694	-0.00113113	-0.018609	0.0305465	6.3131e-05	-2.18766e-05	-0.00131593	0.184626	-0.000697441	0.000188419	-0.000168187
17	2.5	0.1	10	-3.35245	-0.000720432	-0.000139175	0.0918288	-0.000316089	0.000415684	0.00456884	0.00357476	-0.00575753	0.644529	0.421015	-0.00154733	-0.0238818	0.0581105	-0.000170291	-5.54309e-05	-0.000892801	0.0860573	-0.000478469	0.00076903	-0.000218908
17	2.5	0.1	10	-2.9703	-0.000480369	0.000186257	0.0995905	-0.000306352	0.00613522	0.00540226	0.00314309	-0.00165563	0.425762	0.241678	-0.000880728	-0.0187571	0.0475411	5.91848e-05	0.000524308	-7.37555e-06	0.165203	-0.000184271	0.000232579	-0.000248997
17	2.5	0.1	10	2.30909	3.74973e-05	0.000539037	0.171353	0.000305786	-0.00753918	0.00177848	0.00126298	-0.00607418	0.296744	0.120729	-0.00109284	-0.019922	0.0451907	2.44696e-05	0.000207243	-0.000598445	0.144853	-7.51468e-06	0.000639655	-0.000197837
17	2.5	0.1	10	-3.3831	-0.000725467	0.000229751	-0.00995299	9.19252e-06	0.00321566	0.00491404	0.00361883	-0.00345559	0.487026	0.331007	-0.00112287	-0.0190154	0.0345874	0.000195345	0.000732805	0.000372986	0.176006	0.000165379	0.00055536	0.000102588
17	2.5	0.1	10	-0.612685	0.000498142	0.000157466	-0.115163	0.000312033	0.0184758	0.00165229	0.00101216	-0.00216236	0.117962	0.0613802	-0.00105112	-0.0205215	0.0544946	-0.00031236	0.000153727	0.00063674	-0.00488216	3.53389e-05	0.000869336	0.000145132
17	2.5	0.1	10	2.96678	0.000144796	0.000120394	-0.00316602	7.60342e-05	0.00978457	0.00168532	0.000880376	-0.000172625	0.0751478	0.0443986	0.00051007	-0.00890108	0.0432527	0.000364578	0.000786419	0.00112837	0.109174	0.000612475	0.000553531	0.000398098
17	2.5	0.1	10	2.35485	0.000204183	0.00011237	-0.0785714	-1.57475e-05	-0.00170313	0.00279805	0.00143089	-0.00303099	0.25432	0.105869	-0.00108522	-0.0183625	0.0313164	-2.06767e-05	0.000308294	-0.000623918	0.18778	-0.000236376	0.000290997	-0.000435277
17	2.5	0.1	10	1.75698	-0.000161	-4.45915e-05	-0.0288788	-0.000622084	-0.00407778	0.000987817	0.000898568	-0.0062769	0.19861	0.0721973	-0.00155105	-0.0218357	0.0318511	-0.000299575	-9.75768e-05	-0.000513314	0.0193337	0.000344788	0.0002256	-7.32133e-05
17	2.5	0.1	10	-3.0338	-0.000537325	7.37624e-05	-0.0552355	-0.000239174	-0.00368549	0.00202497	0.00121247	-0.00605742	0.329466	0.113555	-0.00157945	-0.0220582	0.0320105	-0.000177788	0.000105578	-0.0001664	0.0516777	0.00037535	0.000135222	0.000115667
17	2.5	0.1	10	-0.402998	0.00010652	4.0256e-05	0.0122354	0.000318293	0.00949617	0.00447809	0.00175062	-0.00241689	0.383536	0.130032	-0.000912988	-0.0208459	0.0682242	0.000163842	0.0006163	-0.000326722	0.245916	-0.000384884	0.000394671	1.55825e-05
17	2.5	0.1	10	-4.05451	-0.000779719	-0.0001002	-0.00293406	-0.000347332	0.000544664	0.00222106	0.00101462	-0.00453764	0.263461	0.0741169	-0.00134174	-0.0202791	0.0316167	-0.000109592	-9.60152e-05	-0.00139784	0.164963	-0.000598366	0.000179365	-0.000321201
17	2.5	0.1	10	4.30558	-4.28554e-06	1.64348e-05	-0.0675786	-0.000342531	0.0194064	0.00571594	0.00450596	5.9647e-06	0.373609	0.315571	-0.00112137	-0.0199605	0.0436441	-9.33558e-05	0.00024071	0.000139231	0.0616422	-2.15765e-05	0.000222104	0.000102827
17	2.5	0.1	10	1.92714	-0.000368799	-0.000135508	0.0400816	-0.000371841	-0.000979941	0.00278403	0.00182927	-0.00581564	0.413856	0.192318	-0.00132809	-0.0222309	0.054116	-0.00010219	0.000190148	-0.00114309	0.247681	-0.000486301	0.000280755	-0.000301128
17	2.5	0.1	10	-3.16511	-0.000671087	2.289e-06	0.0607803	8.41588e-05	0.00354417	0.0067167	0.0057873	-0.00144797	0.525639	0.459985	-0.000246365	-0.0128353	0.0352826	0.000353368	0.000852956	0.000960539	0.14066	0.00031873	0.00111928	0.000455879
17	2.5	0.1	10	1.4549	-0.000501241	-0.000142927	-0.0252183	-0.000393611	-0.00931525	0.00416843	0.00432225	-0.00688508	0.726826	0.607568	-0.00208345	-0.02616	0.03872	-0.000258603	7.71027e-05	-0.000790635	0.125026	-2.01986e-05	0.000523291	-0.000274124
17	2.5	0.1	10	4.17718	0.00076216	0.000381889	0.0115472	0.000238837	0.0208481	0.00660901	0.00505654	0.00289121	0.329867	0.296103	-0.000176594	-0.0165244	0.0676036	2.6435e-05	0.00022274	0.00131535	-0.0308621	0.000169497	1.72955e-05	0.000419032
17	2.5	0.1	10	-3.19162	-0.000555236	-0.000193938	0.00926552	-1.33812e-05	0.0012631	0.00455025	0.00443714	-0.00582085	0.649014	0.539048	-0.00151932	-0.0238016	0.0594861	-9.99499e-05	0.000446578	-0.000432318	0.205129	-0.000453719	7.47352e-05	-0.000152668
17	2.5	0.1	10	2.47821	0.000338739	7.73317e-05	-0.0307856	0.000641036	0.0189979	0.00576761	0.00427248	0.00107856	0.335868	0.277046	-8.70139e-05	-0.0095769	0.023445	0.000551412	0.0014483	0.000530388	0.347149	-3.29016e-05	0.000482276	0.000200862
17	2.5	0.1	10	-3.20584	-0.000973164	-0.00028721	0.0483486	-0.000648014	0.00265959	0.00220398	0.00112122	-0.00553202	0.317979	0.0952612	-0.00170274	-0.0235256	0.0389586	-0.000230998	-0.00020813	-0.00118756	0.0642131	-0.0005674	6.35723e-05	-0.000212766
17	2.5	0.1	10	0.646415	-0.000305806	9.12404e-05	-0.0451988	-0.000495277	-0.00273839	0.00135297	0.00110082	-0.00594914	0.231112	0.0970182	-0.00163277	-0.0239587	0.0513028	-0.000331838	0.000124713	-0.000701864	0.129615	-0.000302276	0.000393453	-0.000552282
17	2.5	0.1	10	2.40177	-0.000300505	-0.000199798	-0.136955	-0.000520271	0.0108913	0.00130668	0.00116343	-0.00293997	0.107169	0.0793706	-0.00170615	-0.0238624	0.0431233	-0.000349851	2.11065e-05	-0.000466641	0.0572118	-0.000118694	0.000231879	-0.000219517
17	2.5	0.1	10	3.1809	0.000281591	0.000210928	-0.0546579	-0.000148817	0.0236547	0.00608251	0.00578725	-6.41936e-05	0.404146	0.413636	-0.000517734	-0.018631	0.0689757	3.93485e-05	0.000393101	0.000927728	0.0333906	4.51228e-05	0.000137602	0.000639419
17	2.5	0.1	10	1.7196	0.000303181	9.14124e-05	-0.0785108	-8.75617e-05	-0.00309115	0.00212579	0.00137803	-0.0056906	0.318123	0.130471	-0.00170836	-0.0223881	0.0251883	-0.00020059	0.00015832	-0.000927707	0.184444	4.29971e-05	0.00043997	-0.000562817
17	2.5	0.1	10	-1.22786	-0.000219697	-0.000176914	0.019691	-6.59341e-05	0.0115393	0.00221355	0.00148858	-0.0018446	0.158476	0.101531	-0.000865074	-0.0156354	0.0233827	3.27319e-05	0.000436752	-0.000641814	0.240644	-0.000211687	0.000266576	-0.000135077
17	2.5	0.1	10	-3.40409	-0.000902726	-0.000254576	-0.0320314	-0.000543722	-0.00118097	0.00107686	0.00101897	-0.00746787	0.290907	0.104236	-0.00180916	-0.0244356	0.0413415	-0.000344344	-0.000154391	-0.0012149	0.0955545	-0.000590025	-5.33578e-06	-0.000426281
17	2.5	0.1	10	3.46559	-4.57701e-05	-0.000164376	-0.105012	-0.000330728	0.00949362	0.00412381	0.00226646	-0.00119648	0.297552	0.160957	-0.00121768	-0.0211962	0.0501076	-9.25545e-05	0.000218988	0.000159297	0.0532078	-7.3764e-05	9.81465e-05	-7.44145e-05
17	2.5	0.1	10	-2.42467	-0.000241006	0.000310402	0.0355368	-7.82633e-05	0.0139397	0.00330992	0.00152212	0.00262026	0.131911	0.0794861	-6.25071e-05	-0.0156534	0.065707	-5.25105e-05	6.92237e-07	0.000978326	-0.0636224	0.000119285	0.000150059	0.000263157
17	2.5	0.1	10	-2.75335	-0.00053451	-0.000163923	-0.117951	-0.000448826	0.0121462	0.00302648	0.00163805	-0.00518493	0.397507	0.155193	-0.00144558	-0.0231256	0.0562534	-0.000380784	-7.18329e-05	-0.000112488	-0.0109693	-0.000166346	5.73744e-05	0.000338392
17	2.5	0.1	10	-1.6879	0.000612653	0.000754152	-0.00929769	-0.000293885	0.00967687	0.00131528	0.00108878	-0.00453921	0.160676	0.0825486	-0.000918173	-0.0208601	0.0680259	-0.000451468	-8.81372e-05	6.43823e-05	-0.0303928	-2.64307e-05	0.000430504	-0.000156195
17	2.5	0.1	10	-1.58889	-0.000177793	-5.79553e-05	-0.0382799	-0.000138934	-0.00374047	0.00123958	0.000844491	-0.00491172	0.166839	0.0565565	-0.00168708	-0.0227669	0.0311122	-0.00019745	0.000392635	-1.79162e-05	0.125677	0.000264906	0.000599125	-0.000121961
17	2.5	0.1	10	-3.19526	-0.000103521	2.02309e-05	0.111143	-0.000328518	0.00132374	0.0047772	0.00227857	-0.00360164	0.483011	0.198182	-0.00138337	-0.0229163	0.0586781	2.59984e-05	0.000538935	-0.000324778	0.218937	-0.000405668	2.51281e-05	-7.29629e-05
17	2.5	0.1	10	-4.72083	-0.000622695	-6.62109e-05	-0.0562757	-0.000144782	-0.00514595	0.00256809	0.00175707	-0.00781714	0.590566	0.24339	-0.00209599	-0.0260191	0.0349314	-0.000289728	-9.74736e-05	-0.00173279	0.263647	-0.000631999	0.000214805	-0.000539717
17	2.5	0.1	10	1.4458	2.70114e-05	3.51265e-05	-0.0483364	-2.40481e-05	0.0215911	0.00470346	0.00260556	-0.000913207	0.33325	0.184912	-0.000413824	-0.0154213	0.0454003	-1.40515e-05	0.000109056	7.59654e-05	0.0283721	-0.000169251	0.000218195	0.000487504
17	2.5	0.1	10	-2.46675	-0.000180392	0.000374966	-0.0271205	0.000102304	0.0175434	0.00436589	0.00168532	0.00312335	0.186441	0.0874319	-1.36087e-05	-0.014798	0.060829	-3.64644e-05	-0.000105618	0.00104886	-0.0920424	9.44625e-05	0.000165993	0.000182526
17	2.5	0.1	10	2.99016	0.000513775	0.000411644	0.0206843	0.000175961	0.0108333	0.00651551	0.00490442	0.00275788	0.328299	0.288982	0.000590322	-0.00903262	0.0471425	0.000408543	0.000904431	0.00205498	0.0631663	0.000806586	0.000763198	0.000760428
17	2.5	0.1	10	2.92013	0.0004969	0.000158962	-0.0361423	0.0001637	0.0198023	0.00701003	0.00919406	-3.83649e-05	0.472713	0.66889	-0.000558884	-0.015263	0.0367001	0.00023116	0.000919131	0.000819602	0.171659	8.77488e-05	0.000527608	0.000567428
17	2.5	0.1	10	-2.77165	-0.00016696	-8.17107e-05	-0.078087	-0.000353477	-0.00662572	0.00147945	0.00114926	-0.00653213	0.285037	0.11113	-0.00216385	-0.026512	0.0350553	-0.000422957	-8.5107e-05	-0.00138157	0.166941	-0.000492793	0.000343237	-0.000674872
17	2.5	0.1	10	-3.14821	-0.000473637	0.00018699	0.00305741	-0.000481032	-0.00516104	0.00206799	0.00113526	-0.00445553	0.242125	0.0871439	-0.00108521	-0.0209869	0.05742	-0.000146203	1.52487e-05	-0.000842514	0.107935	-0.000243906	-8.08118e-05	-0.0002646
17	2.5	0.1	10	2.7884	0.000472637	0.00020928	-0.0582124	0.000153217	0.0141643	0.00429646	0.0024791	-0.00134458	0.317859	0.180475	-0.000741716	-0.0187781	0.0564905	-1.80826e-05	0.000372082	0.000675549	0.0482823	-2.67519e-05	0.000352996	0.000296098
17	2.5	0.1	10	1.04887	0.00121017	0.000180231	-0.131507	0.000720014	-0.0037699	0.00149117	0.00104847	-0.00348148	0.141752	0.0712387	-0.000387699	-0.0138997	0.0356557	0.000142383	0.000251497	-0.000800762	0.198496	-0.000245785	0.001202	-0.000477237
17	2.5	0.1	10	4.1459	6.04334e-05	-0.00012414	-0.0683022	-0.000376121	0.00625304	0.00119644	0.00102738	-0.00407087	0.130552	0.0725264	-0.00106284	-0.0192398	0.0405041	-0.000128276	0.00026512	-0.000447088	0.14251	-8.59088e-05	0.000169014	-9.3673e-05
17	2.5	0.1	10	-1.07417	0.000772092	0.000278703	-0.16024	0.000546908	0.015326	0.00341345	0.00134085	0.00089254	0.177284	0.0745559	-0.000195421	-0.0162137	0.0636812	-5.94266e-05	0.000198721	0.000665181	0.00465503	9.98572e-05	0.000434116	2.91747e-05
17	2.5	0.1	10	3.31664	0.00150686	0.000308746	-0.136544	0.00101509	0.0260883	0.00449621	0.00224555	0.00150693	0.235323	0.133016	0.000464288	-0.00718758	0.032357	0.000349716	0.000457835	0.00156514	0.00515305	0.000102363	0.000243495	0.0003861
17	2.5	0.1	10	-3.36553	-0.000459922	0.000321353	-0.107273	0.000139332	-0.000384253	0.00627689	0.00616097	-0.00326195	0.609341	0.577067	-0.00136776	-0.0213112	0.040207	-6.81013e-06	6.79652e-05	-0.000509083	0.0796999	-0.000345724	-3.41774e-05	-0.000479068
17	2.5	0.1	10	-3.47521	-0.000709262	-2.20881e-05	0.0132271	-0.000453402	-0.000574847	0.00321197	0.00163085	-0.0057424	0.464404	0.164511	-0.00167489	-0.0244462	0.0546255	-0.000197386	2.52993e-05	-0.000924677	0.12614	-0.000468295	-5.7989e-06	-0.000380588
17	2.5	0.1	10	3.83592	0.00040277	8.93242e-05	-0.157758	0.000428283	0.0223507	0.0021692	0.00141496	-0.00132173	0.139978	0.0916532	0.000118477	-0.0131085	0.053978	3.27174e-05	0.000181809	0.00216418	-0.0777472	-3.19442e-05	0.000200917	0.000585932
17	2.5	0.1	10	0.971748	-0.000308075	-5.78881e-06	0.0721023	-8.3222e-05	0.00203052	0.00226823	0.0014682	-0.00217461	0.173433	0.102258	-3.41375e-05	-0.0116545	0.0373178	0.000245999	0.000716013	0.000857857	0.117743	0.000304569	0.000708792	0.000307102
17	2.5	0.1	10	2.5526	0.000372406	0.000170759	0.0183066	3.89752e-05	0.00816127	0.00578241	0.0039533	-0.000493867	0.400394	0.284249	-0.000910817	-0.0152921	0.0187515	0.00037256	0.00102984	-2.96505e-05	0.32625	-0.000127195	0.000432733	-0.000346036
17	2.5	0.1	10	1.59434	0.000404756	0.000222196	0.00384623	0.000193933	0.00136465	0.00344727	0.00222605	-0.00317248	0.324212	0.1853	-0.000864548	-0.0181153	0.0426136	-4.72849e-05	0.000219746	0.000671227	0.00960168	0.000464898	0.000464469	0.000422415
17	2.5	0.1	10	-1.86378	6.50121e-05	0.000606838	0.0293626	0.000718243	0.0135981	0.00487168	0.00291077	0.00297635	0.22075	0.163166	0.000441708	0.00131956	-0.000687259	0.000491495	0.000920648	0.00112203	0.140582	0.000778579	0.000265324	0.000619802
17	2.5	0.1	10	-3.37479	-0.000953767	-0.000296891	0.132852	-0.000553249	0.00394113	0.00261543	0.00181606	-0.00640066	0.439781	0.205337	-0.00155614	-0.0229489	0.044394	-0.000120664	9.92027e-05	-0.0010979	0.193838	-0.000542467	0.000266219	-0.000192345
17	2.5	0.1	10	-0.516163	0.000613012	3.84165e-05	-0.19987	7.23793e-05	0.0161552	0.00246074	0.00134541	0.000296332	0.12315	0.0774849	-0.000691726	-0.0192421	0.0645808	-0.000153251	0.000312536	3.25634e-05	0.0948435	2.12237e-05	0.000825186	-9.85853e-05
17	2.5	0.1	10	-0.244316	0.000299963	0.000243068	-0.0731315	-8.81022e-05	0.0100784	0.00312599	0.00198875	-0.00266905	0.270244	0.15505	-0.000918219	-0.0206453	0.0653757	-0.000215204	0.000169545	0.000171163	0.0375075	-2.93742e-06	0.000908693	1.80926e-05
17	2.5	0.1	10	3.94037	0.000283011	2.96104e-05	-0.0424679	-0.00014615	0.0150543	0.00724938	0.00379589	0.00241923	0.385817	0.224544	-0.00104512	-0.0190853	0.0402012	-0.000161612	0.000485098	0.000156766	0.132023	-6.16883e-05	0.000210375	0.000273278
17	2.5	0.1	10	3.66196	0.000576769	0.000364258	-0.0837	0.000154792	0.0149494	0.0067167	0.00796618	0.000364118	0.432092	0.56013	-0.000584126	-0.0174819	0.0534961	5.40328e-05	0.000467401	0.000770503	0.0643012	-7.55416e-05	0.000470792	0.000394067
17	2.5	0.1	10	2.57156	-0.00020766	-2.41324e-05	0.0317572	-0.000174876	-0.00122814	0.00480415	0.00323971	-0.00336492	0.469936	0.29015	-0.000800786	-0.0168052	0.0353735	0.000116099	0.000525267	-1.21828e-05	0.166167	0.000228621	0.000424072	8.76628e-05
17	2.5	0.1	10	0.14195	-0.00014884	-2.63708e-05	0.00742754	-0.000393225	0.0167612	0.00177544	0.00113868	-0.00247551	0.137936	0.0743516	-0.000651812	-0.016794	0.0436191	-0.000120395	0.000172117	-0.000300891	0.0896466	-0.000187476	0.000469741	0.00021351
17	2.5	0.1	10	-1.25276	-4.03517e-05	9.57183e-05	0.054732	-0.000459669	0.0105167	0.00227531	0.00118245	-0.00258207	0.187549	0.079004	-0.00100472	-0.0201206	0.0532944	-0.000303132	0.000122643	2.6221e-05	0.0372637	-8.78857e-05	0.000363557	9.11837e-05
17	2.5	0.1	10	2.36182	0.000860321	0.000276577	-0.0969571	0.000969624	0.018332	0.000680929	0.00101154	-0.000976891	0.0106652	0.0569031	0.000295196	-0.00287904	0.00845196	9.6007e-05	0.000336726	0.00082591	0.0273741	-5.27204e-07	0.000228549	0.000365221
17	2.5	0.1	10	-2.10608	0.000160836	0.000202217	-0.0658149	0.000591273	0.00346742	0.000397056	0.00072987	-0.00374942	0.0367702	0.0396005	-0.00115048	-0.0186875	0.0300006	-8.5714e-05	4.79414e-06	-0.00100066	0.130805	-0.000257785	0.000490965	-0.000612684
17	2.5	0.1	10	3.61777	-0.00013348	2.36021e-05	-0.081855	-0.000596958	0.00970405	0.00540316	0.00708546	-0.00226772	0.459431	0.610096	-0.00101705	-0.0210099	0.0626833	-8.81354e-05	0.000700024	0.000285466	0.178049	-2.13745e-05	-2.23773e-05	0.000202749
17	2.5	0.1	10	-2.43681	-0.000618541	1.76683e-07	0.00391081	-0.00071125	0.00256274	0.00185005	0.00169874	-0.00425376	0.208737	0.147529	-0.00152709	-0.0227351	0.0441552	-0.000345227	5.40871e-05	-0.000285681	0.0476517	-0.000109664	9.9807e-05	5.69341e-05
17	2.5	0.1	10	-2.86134	-0.000130824	0.000596618	0.126623	-0.000192015	0.00677746	0.00110235	0.00109551	0.00200311	0.000700982	0.0542754	0.00184663	-0.00298419	0.0577905	0.000370172	0.000634628	0.00107494	0.0787538	0.00068393	0.00083665	0.000224294
17	2.5	0.1	10	-3.325	0.000378912	-0.000198578	0.0557287	-0.00025578	0.0011724	0.00213193	0.00097796	-0.00395824	0.226463	0.0665739	-0.000849712	-0.0194555	0.0565725	0.000100866	0.000163368	-0.000768738	0.156462	-0.000483066	0.000392148	-5.90034e-05
17	2.5	0.1	10	-0.533047	-0.000349501	2.71123e-05	-0.0715731	0.000396448	-0.00857477	0.00116868	0.00179863	0.00915906	-0.0544697	0.0730916	-0.00168265	0.0214213	-0.0758659	-8.96299e-05	0.000141761	0.00076572	-0.016776	0.000406737	0.000244302	-0.000456181
17	2.5	0.1	10	-3.27299	-0.000882371	-0.000107397	0.146806	-0.000547831	0.000697328	0.00211505	0.00147368	-0.00332082	0.198801	0.112759	-0.000468832	-0.0161151	0.0480511	0.000249626	0.000663609	-7.43735e-06	0.208434	0.000194247	0.000209467	2.70242e-05
17	2.5	0.1	10	-3.60327	-0.000689153	0.000116248	0.0681859	-9.61547e-05	-0.00274127	0.00416803	0.00207645	-0.00357635	0.418929	0.177018	-0.000804002	-0.0164143	0.0321964	1.79191e-05	5.55088e-05	-0.000649341	0.0944537	-0.000403554	-5.00915e-06	-0.000233338
17	2.5	0.1	10	0.0941424	-0.000446036	-0.000160126	0.00491903	-0.000574522	-0.00533337	-0.000781725	0.000617608	-0.00602584	-0.0562227	0.0318539	-0.00173367	-0.0228893	0.0285689	-0.000283808	0.000353868	-0.000384673	0.164417	0.000170776	0.00042605	-0.00023689
17	2.5	0.1	10	3.45908	0.00129804	0.000467987	-0.128029	0.000710839	0.0213169	0.00512681	0.00462788	-0.00052515	0.350675	0.337526	-0.000442825	-0.0174276	0.0611931	9.00721e-05	0.000435726	0.000913475	0.044757	-1.99741e-05	9.00253e-05	0.000401827
17	2.5	0.1	10	-3.10454	-0.000778064	-0.000162902	0.00654852	-0.000278691	-0.000484175	0.000870235	0.00110922	-0.00453742	0.110075	0.0848564	-0.000458097	-0.0153564	0.0426034	-4.50378e-05	-7.06606e-08	-0.00095491	0.120395	-0.000321478	0.000256787	-0.00045944
17	2.5	0.1	10	-3.2524	-0.000834092	-0.000154626	0.099019	-0.000345409	0.00172156	0.000667367	0.000851808	-0.00370034	0.063684	0.0521197	-3.69681e-05	-0.0131339	0.0469475	0.000199236	0.000512737	0.000406025	0.111339	0.000236024	0.000336295	3.4027e-05
17	2.5	0.1	10	-1.89726	-5.0153e-05	-8.71624e-05	-0.016449	-0.0002002	0.00809761	0.000871833	0.00120131	-0.00527229	0.136868	0.102606	-0.00177328	-0.0240486	0.0393957	-0.00044298	0.000129959	-0.000171743	0.0602294	-0.000194471	0.000438957	0.000321768
17	2.5	0.1	10	-2.0816	-0.000473295	-8.1019e-05	0.0528238	-0.000408502	-0.00281695	0.00220069	0.00129812	-0.00455847	0.262198	0.106522	-0.00110818	-0.0186515	0.0323378	-1.83942e-06	0.000284388	-0.000335886	0.132912	0.000153257	0.000593939	-0.000141285
17	2.5	0.1	10	2.41641	0.000287518	0.000229023	-0.0243497	0.000387845	0.0245176	0.00558451	0.00417921	-1.62368e-05	0.364673	0.291557	5.3549e-05	-0.0155092	0.0704812	0.000180604	0.000462934	0.000898879	0.0524962	-0.000140076	0.000460777	0.000616305
17	2.5	0.1	10	-1.76872	0.000197618	6.87862e-05	-0.164176	-1.46725e-05	-0.00478701	0.0041513	0.00548393	-0.00511969	0.529664	0.621659	-0.00154073	-0.0224409	0.039457	-0.000206572	0.000101015	2.70809e-05	0.0305405	0.000286351	0.000450342	-3.52904e-05
17	2.5	0.1	10	-0.703345	-0.000467846	-0.000268533	-0.0292186	-0.000348988	-0.000584058	0.00269294	0.00133805	-0.00505293	0.348056	0.116784	-0.00182486	-0.0244548	0.0400793	-0.000258446	9.00696e-05	-0.000809894	0.133611	-0.000463066	0.000489491	-0.000179699
17	2.5	0.1	10	1.7625	0.000395486	0.000236697	-0.0485236	-0.000105008	0.00547609	0.00189505	0.00125123	-0.00269908	0.155892	0.0861663	-0.000512338	-0.0156955	0.0423782	-0.000129446	0.000233785	0.000720024	0.00957077	0.000535008	0.00038924	0.000127742
17	2.5	0.1	10	-4.67365	-0.000876721	2.06436e-05	0.12483	-0.000529084	0.00118961	0.000825758	0.000802151	-0.00587979	0.156651	0.056249	-0.00141321	-0.0233005	0.0615775	-0.000173346	-2.43813e-06	-0.000418577	0.0430635	-0.000595566	0.000181227	-0.000158079
17	2.5	0.1	10	1.41601	0.000781357	0.00015648	-0.0957187	0.000371857	-0.00236328	0.0026109	0.00122518	-0.00365004	0.262882	0.0904407	-0.00123433	-0.0196332	0.0329009	-3.15823e-05	0.00028272	-0.000810748	0.213378	-0.000204287	0.000462999	-0.000547744
17	2.5	0.1	10	-0.514255	-0.000397081	0.000234767	0.0622852	-0.000131707	0.0198429	0.00441883	0.00188763	0.00235467	0.207856	0.103855	0.000494296	-0.0115893	0.059811	0.000258754	0.000411807	0.000811168	0.0470751	-0.000141495	0.000311607	0.000864523
17	2.5	0.1	10	-3.03032	-0.000698677	-0.000153931	0.0437211	-0.000340216	0.00516705	0.0044566	0.00203643	-0.00253575	0.387767	0.157736	-0.000683975	-0.0160704	0.0361164	-2.27567e-05	0.000164114	-0.000455614	0.107408	-0.000197769	0.000147686	-0.000231055
17	2.5	0.1	10	3.04712	-3.72885e-05	5.26252e-05	-0.00898228	-0.000195251	0.0108771	0.003889	0.00178546	-0.000542393	0.254707	0.115938	-0.000384643	-0.0142231	0.0380266	3.77743e-06	0.000234387	0.000139809	0.0597074	-0.000142739	0.000153527	-9.98075e-05
17	2.5	0.1	10	-1.11697	-0.000346501	-0.00025885	-0.0223571	-0.000572821	0.0053058	0.00178857	0.00161138	-0.00253999	0.141061	0.118453	-0.0010533	-0.0191572	0.0403452	-0.000227508	0.000257448	-0.000877796	0.216714	-0.0002536	0.000139037	-0.000276633
17	2.5	0.1	10	3.19621	1.82563e-05	5.15493e-05	-0.104022	-0.000406559	0.0125389	0.00418253	0.00614498	-0.00539527	0.558265	0.725839	-0.00172649	-0.0243605	0.0482955	-0.000271796	0.000111939	-0.000198522	0.0572964	-0.000174591	0.000194492	0.000363006
17	2.5	0.1	10	2.07418	8.92738e-05	1.85526e-05	-0.0515669	9.64976e-06	0.00383501	0.00324211	0.00301937	-0.00598727	0.490017	0.358201	-0.00213618	-0.027617	0.0608869	-0.000278273	0.0002893	-0.00102846	0.265209	-0.00045483	0.000299901	-0.000305035
17	2.5	0.1	10	2.92158	-0.000421467	-0.000185698	0.0138711	-0.000294554	0.00380189	0.00166595	0.00091622	-0.00440777	0.194872	0.06225	-0.000983188	-0.019371	0.046957	0.000105169	0.000395416	-0.000382034	0.178592	-0.00044909	0.000341781	9.1719e-05
17	2.5	0.1	10	4.0587	-3.26935e-05	-3.01896e-05	-0.0155032	-0.000170927	0.00921496	0.00667296	0.00740729	-2.37934e-05	0.446693	0.534043	-0.000572119	-0.0158405	0.040337	6.40672e-05	0.000559195	0.000230254	0.144672	-0.00013729	0.000103755	-4.39962e-05
17	2.5	0.1	10	-0.646824	-0.000203286	-0.000145173	-0.110544	-0.000459949	0.0185938	0.00215513	0.0020502	-0.00378926	0.221667	0.177877	-0.00135864	-0.0212595	0.0403288	-0.000258567	0.00018111	-0.000278717	0.0899121	-0.000109284	0.000253879	9.09858e-05
17	2.5	0.1	10	-4.34596	-0.000441046	3.73836e-07	-0.0643762	-0.000375738	-0.00926149	0.00118508	0.000937478	-0.00696107	0.270309	0.084402	-0.0018896	-0.0242948	0.0316045	-0.000333114	-6.05594e-05	-0.00148755	0.208244	-0.00029541	0.000399994	-0.000798066
17	2.5	0.1	10	2.85914	0.000368213	0.000205602	-0.0983213	-7.55169e-05	0.0118955	0.00488671	0.00347559	-0.000634522	0.336369	0.249642	-0.000904419	-0.0184574	0.0432644	-0.000102929	0.000313428	1.86782e-05	0.0967223	-0.000127157	0.000310021	0.00015945
17	2.5	0.1	10	3.25498	0.000250651	0.000414626	-0.12292	-0.000166362	0.0109879	0.0058574	0.0079952	-0.00274687	0.531295	0.722832	-0.00150695	-0.0229127	0.0481184	-0.000124134	0.000370349	-0.000137113	0.134129	-0.000118943	0.000163985	-1.3433e-05
17	2.5	0.1	10	2.61029	-0.000242433	-0.000178329	-0.0590465	-0.000193895	0.00777298	0.0032129	0.00233046	-0.00508372	0.412973	0.237294	-0.00199857	-0.0255684	0.0387173	-0.000210188	0.000165853	-0.000459016	0.108512	-0.000373071	0.000434174	0.000103571
17	2.5	0.1	10	-0.981968	0.000348818	6.52893e-05	-0.194383	4.24893e-05	-0.000857685	0.00242148	0.00203945	-0.00397402	0.258051	0.179937	-0.0011302	-0.0214879	0.0601718	-0.000304778	-9.74078e-05	-0.000185397	-0.0129122	-0.000254779	0.00106232	5.12331e-05
17	2.5	0.1	10	-0.293948	-1.81128e-05	-0.000130293	-0.011375	-0.00043598	0.00638681	0.00604934	0.00238793	-0.000400918	0.416834	0.161382	-0.00175669	-0.0241765	0.0427344	-0.00045054	0.000264342	-0.000620978	0.170409	-0.000171419	8.26998e-05	-0.000249861
17	2.5	0.1	10	-4.40861	-0.000839146	-0.000114741	0.0788965	-0.000254853	0.00241737	0.00103892	0.000862739	-0.00546104	0.165697	0.0617534	-0.00081845	-0.0202429	0.0675456	-5.79852e-05	-8.1103e-05	-0.000110492	-0.0141131	-0.00054051	0.000116817	-5.74244e-05
17	2.5	0.1	10	-2.25327	-0.000571684	-6.50551e-05	0.037451	-0.000159286	0.00208297	0.00181668	0.000991654	-0.00283598	0.152837	0.0623898	-0.000433516	-0.0144965	0.037539	8.09857e-05	0.000515912	0.000611934	0.091161	0.000187688	0.000554434	0.000149602
17	2.5	0.1	10	2.57031	0.000272363	0.000130749	0.00154556	-0.000281495	-0.000743267	0.00138838	0.0011678	-0.00084227	0.0651744	0.0689522	-0.000575778	-0.0154819	0.0374341	-0.000159634	-2.76227e-06	0.000273395	-0.0209524	0.000485317	0.00042037	1.36241e-05
17	2.5	0.1	10	0.191572	0.000222097	3.81356e-05	-0.0592879	0.00015518	0.00943232	0.00447166	0.00201472	-0.00167582	0.347064	0.145371	-0.00101996	-0.0186192	0.0375584	-3.82032e-05	0.00046058	-0.000662488	0.25412	-0.00022952	0.000909119	-0.0002755
17	2.5	0.1	10	0.223788	4.53898e-05	0.000136609	-0.0268069	-0.000328811	-0.00337874	0.00148336	0.00116929	-0.00465998	0.184795	0.0927555	-0.00111313	-0.018962	0.0347333	-0.000302135	-2.97688e-05	-0.000622089	0.0578398	0.000178931	0.00020825	-0.000450661
17	2.5	0.1	10	-0.258232	-2.28888e-05	3.29472e-05	-0.103084	0.000436922	0.0314228	0.00555576	0.00772492	0.00242868	0.278105	0.473509	0.000769917	-0.0131619	0.0846604	0.00018764	0.000182747	0.00162487	-0.0550203	-0.000144571	0.000319599	0.00106226
17	2.5	0.1	10	-3.26654	0.000216057	0.000322788	0.0516077	0.00037358	0.0110493	0.00701174	0.00753733	-0.00261085	0.629796	0.67121	-0.00126649	-0.0209167	0.0434118	0.000148919	0.0004543	0.000163437	0.122137	-0.000403432	0.00058726	0.000198673
17	2.5	0.1	10	2.49798	-0.000198434	-0.000163171	-0.0810158	-0.000478275	0.010589	0.00258727	0.00130763	-0.00245901	0.212028	0.0897818	-0.00086996	-0.0189103	0.049705	-0.000266293	-3.20529e-05	-2.64778e-05	-0.00579169	-0.000132193	0.000133955	6.36643e-05
17	2.5	0.1	10	-0.306887	0.00018254	4.59223e-05	-0.0749294	0.000230783	0.0201972	0.00598098	0.00390732	-0.000493782	0.415841	0.28067	-0.000553922	-0.0165227	0.0467945	3.68916e-05	0.000451786	0.000919055	0.0481899	-8.59807e-05	0.00040447	0.00070706
17	2.5	0.1	10	3.03068	0.000184558	-5.43606e-05	-0.0698919	5.31903e-05	0.0207534	0.00665245	0.0073161	-0.000392171	0.462992	0.541759	-0.00104658	-0.020217	0.051453	0.000253707	0.000956424	0.00102965	0.158114	-0.000155321	0.000326385	0.000586955
17	2.5	0.1	10	-4.51435	-0.000872548	1.56431e-05	0.0932005	-0.000545564	-0.00440228	0.00236508	0.00149223	-0.00731557	0.492621	0.180482	-0.00181371	-0.0238226	0.032665	-0.000271383	-0.000254611	-0.00111865	0.03095	-0.000646527	6.1808e-05	-0.00041491
17	2.5	0.1	10	1.0922	-1.16945e-05	-4.96933e-05	-0.0489075	-0.000129275	0.0173427	0.00497718	0.00309039	-0.000863253	0.353118	0.223077	-0.000471226	-0.0157088	0.0446496	-2.7902e-05	0.000180562	0.000285019	0.0303385	-0.00015109	0.000234152	0.000124923
17	2.5	0.1	10	4.75435	0.000206503	7.1588e-05	-0.0321742	8.33098e-05	0.0275323	0.00654608	0.00426855	0.00345935	0.308814	0.239713	0.000219873	-0.0121241	0.0515438	0.000339968	0.00086592	0.00144977	0.0993931	-1.68271e-05	0.000477086	0.000928719
17	2.5	0.1	10	2.62656	0.000372048	0.00016855	-0.0319562	0.000247587	0.0195211	0.00281105	0.00117224	-0.000335196	0.164893	0.0671978	0.00035848	-0.0129609	0.0639544	0.000156965	0.000290609	0.000213995	0.0687003	-0.000137079	0.000161202	0.000167115
17	2.5	0.1	10	-1.24814	0.000546497	0.000284321	-0.112239	-7.26977e-05	-0.00129477	0.0024446	0.00242927	-0.00517582	0.32563	0.251893	-0.00126743	-0.020803	0.0421286	-0.000239829	-4.82822e-05	5.17155e-05	-0.0172839	0.000338477	0.000523589	-0.000130944
17	2.5	0.1	10	3.00753	-0.000183575	2.48136e-05	0.00416772	-9.26109e-05	0.00926008	0.00473406	0.00327896	-0.00324109	0.455008	0.290664	-0.00132928	-0.0219058	0.0499765	-1.16035e-05	0.000428989	8.69716e-05	0.12379	-0.000371928	0.000244954	8.76104e-05
17	2.5	0.1	10	2.72707	0.00023956	0.000138314	-0.0270128	-3.61223e-05	0.0133549	0.00187521	0.00100947	-0.00118694	0.112226	0.0574532	-0.000267534	-0.0166187	0.0634657	6.85986e-05	0.000347319	0.000420195	0.0645045	-8.94263e-05	0.000240128	8.13786e-05
17	2.5	0.1	10	2.87289	0.000436544	5.30596e-05	-0.0863024	0.000302926	0.0232655	0.00715174	0.0100402	-0.000219372	0.492539	0.742373	-0.000842941	-0.0198324	0.0611273	0.000202072	0.000391537	0.000283808	0.0904814	-0.000155415	0.000147353	0.000600422
17	2.5	0.1	10	1.20589	-0.00030662	-0.000177507	0.152437	-0.000262879	0.0120263	0.000186326	0.000762557	-0.00345272	0.00890351	0.0421728	-0.000764269	-0.0180472	0.0480421	7.54676e-05	0.000330476	-0.000426818	0.162763	-0.00038103	0.000182626	4.80945e-06
17	2.5	0.1	10	-3.48295	0.000827469	0.000236207	-0.143832	0.000687443	0.00311703	0.00597383	0.00753211	-0.00361827	0.607175	0.738619	-0.000918839	-0.0216442	0.078377	-0.000196958	-0.000185283	-0.000165547	-0.0433183	-1.90581e-05	-6.36909e-05	-0.000199118
17	2.5	0.1	10	2.65977	0.000121814	9.05271e-05	0.054289	-0.000225289	0.0139928	0.00336247	0.00131256	0.000157317	0.193076	0.0756937	-0.000114036	-0.0160787	0.0668355	0.000123108	0.000437224	0.0003087	0.100781	-0.00015834	0.000234604	0.000170933
17	2.5	0.1	10	1.72681	6.54033e-06	-6.51898e-05	0.0903362	-0.000390888	0.00868913	-0.000196676	0.000736872	-0.000269887	-0.0668778	0.0336403	0.000412381	-0.0133219	0.0693324	-6.08591e-05	-8.24589e-06	0.000358129	-0.0286117	-0.000166225	6.07444e-05	8.38297e-05
17	2.5	0.1	10	2.39977	0.000319308	6.42872e-05	-0.0593121	0.000410818	0.0314159	0.00706321	0.00678208	0.00103259	0.427638	0.452435	-0.000727766	-0.0184076	0.0536736	0.000344978	0.00102716	0.0020702	0.0853331	-5.8696e-05	0.000112569	0.000957574
17	2.5	0.1	10	1.61047	0.000347709	0.000162555	-0.142116	-9.05754e-05	0.00154363	0.00353642	0.00299581	-0.00434334	0.399971	0.292941	-0.00148897	-0.0230455	0.0514114	-0.000208707	-0.000276909	-0.000631738	-0.0360081	-0.000305343	-9.48537e-05	-0.000639655
17	2.5	0.1	10	-1.93579	-0.000176948	-2.01498e-05	0.0285571	-6.82016e-05	-0.00242126	0.0029684	0.0017665	-0.00485525	0.368158	0.164886	-0.00161111	-0.0241937	0.0568714	-0.000185688	0.000190394	-0.000395642	0.10847	-0.000486983	0.00089482	-0.000316521
17	2.5	0.1	10	-2.59763	-0.000559326	5.42751e-05	-0.0518317	-0.000130513	0.012881	0.00376557	0.00192879	-0.000276139	0.236364	0.124854	-0.000965753	-0.0190751	0.0451956	-8.27644e-05	0.00032419	0.000298565	0.0698451	-0.000100204	0.000328479	0.000526856
17	2.5	0.1	10	0.0805014	-0.00035408	-3.88758e-05	-0.0107012	-0.000500391	-0.0057478	-0.000243866	0.000672423	-0.00538298	0.00117087	0.0373933	-0.00101047	-0.0195147	0.0465954	-0.00023588	1.16916e-05	-0.00054224	0.0632101	0.000123329	0.000495947	-0.000313977
17	2.5	0.1	10	2.25458	-0.000307798	5.96937e-05	0.0831254	-0.000140914	0.011746	0.0029303	0.00123596	-0.0024383	0.242731	0.0830688	-0.000516119	-0.0172234	0.0550493	5.76969e-05	6.23804e-05	0.000177328	0.00548412	-0.000296739	0.000308202	0.00012864
17	2.5	0.1	10	-0.203055	-0.00063794	-0.00012961	-0.0185557	-7.86068e-05	-0.00177305	0.00166541	0.00116698	-0.00600749	0.276982	0.106685	-0.00171404	-0.0221977	0.0227494	-0.000186304	-0.000193929	-0.000956891	0.0354742	-0.000593019	-0.000168202	-0.000339212
17	2.5	0.1	10	3.57219	0.000689696	4.60858e-05	-0.00736749	0.000298308	0.03221	0.00360101	0.00140334	0.00869784	0.0585467	0.0563704	0.000632634	-0.00399316	0.0235641	0.000179521	0.000586208	0.00169518	0.0236713	0.000109879	0.000289935	0.00100551
17	2.5	0.1	10	1.19899	-8.82079e-05	2.9152e-05	0.0745897	-0.000207598	0.0101009	0.00494401	0.00303036	-0.00118192	0.364413	0.223588	-0.000882278	-0.0205604	0.0669	-4.52571e-05	0.000215105	-0.000129687	0.0830672	-0.00024305	3.99251e-06	3.22982e-05
17	2.5	0.1	10	2.29968	3.96937e-05	2.72616e-05	-0.017607	-0.00036491	0.00845714	0.00335657	0.00233619	-0.00299279	0.306663	0.192986	-0.00115741	-0.022229	0.0678115	-0.00033108	-4.13381e-05	-0.000219597	0.00875186	-0.000194724	0.000147677	-6.54258e-05
17	2.5	0.1	10	-2.98866	-0.000503052	-8.86535e-05	-0.0142337	-0.000252842	-0.00316321	0.000533872	0.000791005	-0.00503994	0.0872503	0.0507548	-0.00123158	-0.0213992	0.0514302	-0.000131191	0.000186274	-0.000100896	0.0705087	0.00017499	0.000644709	-6.89243e-05
17	2.5	0.1	10	-1.08045	-0.000239677	6.29867e-05	0.0461697	1.1191e-06	0.00820017	0.00340771	0.00180247	-0.00393613	0.361099	0.154086	-0.00111977	-0.0206209	0.0507349	2.12652e-05	1.03597e-05	-0.000363753	0.0413378	-0.000467914	0.000313292	-1.56516e-05
17	2.5	0.1	10	-2.6035	-0.000314924	-0.000119171	-0.0873096	-0.000130909	0.0163153	0.00457414	0.00233591	-0.000987398	0.325879	0.16411	-0.00110708	-0.0207422	0.0529994	-0.000170016	0.000206567	0.000483497	0.0207227	-0.000167394	0.000173889	0.000480023
17	2.5	0.1	10	-2.6556	-0.000400656	-2.33066e-05	-0.0688561	5.9707e-06	0.00866545	0.00454565	0.00355704	-0.00318863	0.433166	0.316622	-0.0013109	-0.0217388	0.0493986	-9.37569e-06	0.000205072	-0.000332949	0.105117	-0.000358972	0.000249964	2.14123e-07
17	2.5	0.1	10	3.93914	0.000930518	0.000171039	-0.192603	0.000618073	0.0249416	0.00675884	0.00672614	0.00129785	0.395806	0.440693	-0.000421629	-0.0170418	0.0587628	0.000204001	0.000581718	0.00173244	0.020482	-8.73487e-05	0.000276225	0.000683232
17	2.5	0.1	10	3.63308	0.00100054	4.70384e-05	-0.195477	0.000503918	0.0268231	0.00250658	0.00176015	0.00074847	0.116611	0.104915	-9.59188e-05	-0.0120123	0.0368346	0.000201187	0.000784675	0.00115475	0.106431	-4.42397e-05	0.000259825	0.000420702
17	2.5	0.1	10	0.721634	-0.000284093	-0.000207737	-0.0455935	-0.00026368	0.0121048	0.00336094	0.0012981	-0.000698656	0.218348	0.0786448	-0.00136558	-0.0212588	0.0398032	1.53662e-05	0.000512189	-0.000574798	0.255897	-0.000309893	0.000168298	-0.000319769
17	2.5	0.1	10	2.60651	0.000619814	-8.09388e-06	-0.118056	0.000314472	0.0165651	0.00945474	0.00936039	0.00361397	0.475852	0.537914	-0.000363493	-0.018974	0.0825991	0.000226146	0.000420171	0.000912325	0.0410926	-0.000160148	0.000504937	0.000596402
17	2.5	0.1	10	-2.97483	-0.000358653	0.000167403	0.00347573	-0.000579463	-0.00223404	0.00149193	0.000924294	-0.00264063	0.116387	0.0552355	-0.000849963	-0.0178844	0.0414549	-0.000279308	-0.000138493	-0.000434066	-0.0037992	0.00015947	0.000217771	-0.000298569
17	2.5	0.1	10	-2.75748	-0.000361544	0.000179727	-0.0253606	0.00040896	0.0189386	0.00644636	0.0036089	0.00208887	0.345942	0.216909	6.60935e-05	-0.0137615	0.0564307	0.000249566	0.000449879	0.00168871	-0.0036424	-1.95024e-05	6.56907e-07	0.000911362
17	2.5	0.1	10	2.08607	0.000177646	0.00010415	-0.0800171	0.000228119	0.00607439	0.00353618	0.00158641	-0.00232313	0.293264	0.114156	-0.000822321	-0.0200176	0.064632	-0.000182231	4.30946e-05	-0.000142813	0.0289021	-0.000219659	0.000330841	-1.753e-05
17	2.5	0.1	10	2.07469	0.000498978	0.000240794	-0.114387	0.00049597	0.00641749	0.00464855	0.00253021	-0.00291016	0.426609	0.210172	-0.00076806	-0.0202947	0.0716719	-0.00016582	-0.000118932	-0.0001895	-0.0196294	-0.000292392	0.00025261	-8.56615e-05
17	2.5	0.1	10	-0.231583	0.000184516	-5.97323e-05	-0.0760542	0.000174992	0.0170835	0.00511889	0.00302429	0.00222941	0.255942	0.177552	-0.00077058	-0.0179714	0.0469704	-1.29337e-05	0.000308297	0.000961242	0.0106481	-0.000173466	0.000389943	0.000472323
17	2.5	0.1	10	-1.19585	-3.80437e-05	0.000118024	0.0364041	-0.000289014	-0.00525274	7.64791e-05	0.00111396	-0.00478415	0.0257736	0.0874174	-0.000494377	-0.0151968	0.0395319	1.81687e-05	0.000193905	-0.000855655	0.185319	-0.000226938	0.000378581	-0.00062547
17	2.5	0.1	10	2.48132	-0.000200791	-5.35065e-05	-0.00186056	-0.000331253	0.0149619	0.00472734	0.00311711	-0.0017503	0.372515	0.241286	-0.00137457	-0.0233607	0.0658795	-0.000208474	0.000229962	0.000730757	0.00781937	-0.0002264	4.12694e-05	0.000272913
17	2.5	0.1	10	-1.36563	0.000102646	5.56371e-06	-0.041746	-0.000103029	-0.00905878	0.000866861	0.000975879	-0.00608559	0.171915	0.081345	-0.00146452	-0.022785	0.0500442	-0.000304458	-6.19823e-05	-0.00154854	0.225124	-0.000363842	0.000577949	-0.000489621
17	2.5	0.1	10	1.84391	0.000445339	0.00028037	0.0630167	0.000179369	0.00861585	0.00479481	0.00317479	-0.00089339	0.339767	0.230358	-0.000586961	-0.0155221	0.0371488	0.000136694	0.000802691	0.000455624	0.184729	9.96033e-05	0.000511902	-0.000149033
17	2.5	0.1	10	1.70566	0.000900235	0.000321409	0.0779327	0.000375893	0.00557393	0.000880943	0.00109071	-0.00071599	0.0225214	0.0623099	0.000400435	-0.00383058	0.0153582	0.000299355	0.000606148	0.000400202	0.137697	0.000172089	0.000134757	-0.000178448
17	2.5	0.1	10	2.78665	0.000752451	9.18093e-05	-0.156052	0.000544839	0.0298194	0.00594956	0.00620917	0.00165879	0.327965	0.396001	-0.00010466	-0.0186231	0.0946315	0.000108013	0.000266405	0.000793037	0.0124124	-1.00703e-08	0.000390995	0.000784935
17	2.5	0.1	10	-1.75612	-6.95917e-05	-0.00031201	-0.216053	3.13166e-05	-0.000532021	0.00255752	0.001243	-0.00358007	0.254227	0.0917266	-0.00194649	-0.0245198	0.0290237	-0.00029945	0.000474109	-0.00109127	0.367632	-0.000449005	0.000661997	-0.000489984
17	2.5	0.1	10	-4.69779	2.05886e-05	0.000422938	-0.0162431	-0.000249238	-0.00930243	0.00270651	0.00234633	-0.00713693	0.528206	0.313309	-0.00205475	-0.0257908	0.0359851	-0.000335141	4.5775e-06	-0.00138302	0.215842	-0.000359591	-5.85579e-05	-0.00070216
17	2.5	0.1	10	-0.786329	-0.000455757	-0.000304032	-0.0605006	-0.000435767	0.00181447	0.00244557	0.00125528	-0.00353093	0.240634	0.0925943	-0.00162203	-0.0226003	0.0346256	-0.00029554	5.61818e-05	-0.000869	0.129628	-0.000386024	0.000449629	-0.000545567
17	2.5	0.1	10	2.6213	0.000227652	0.000175971	-0.0218649	-2.38478e-05	0.00679168	0.00318592	0.00211843	-0.00124962	0.222117	0.149358	-0.000800333	-0.0203229	0.0697686	-9.83561e-05	9.08644e-05	0.000660079	-0.0226945	-0.000114365	0.000135407	0.000317624
17	2.5	0.1	10	-0.393338	-0.000319526	7.51462e-06	-0.022571	-0.000190944	-0.00749591	0.00244941	0.0016786	-0.00588043	0.374199	0.17367	-0.00153633	-0.0234484	0.0527988	-0.000230188	0.000107479	-0.000387977	0.0782498	-0.000100105	0.000585	-0.000365764
17	2.5	0.1	10	2.09493	0.000254896	0.000273425	0.153701	0.000231047	0.0147425	0.00478843	0.00206558	0.00287233	0.2182	0.111998	0.000418421	-0.0107534	0.0508861	0.000649335	0.00144717	0.000786304	0.306872	0.000310535	0.000772213	2.19584e-05
17	2.5	0.1	10	1.78581	0.00140711	0.000404629	-0.0145321	0.000424709	0.00870079	0.00291996	0.00149883	-0.0003152	0.172719	0.0921831	0.000210618	-0.0108082	0.0425349	0.000442133	0.00103708	0.00114827	0.16465	0.000322367	0.000703361	0.000144019
17	2.5	0.1	10	-3.14435	-0.000385406	0.000363821	0.0764841	-6.80843e-05	0.00731257	0.00371552	0.00182043	7.40539e-05	0.221714	0.113917	-7.72205e-05	-0.0180909	0.0898857	-7.36595e-05	-3.2524e-05	0.001061	-0.0755428	-0.000106208	-3.20095e-05	0.000264918
17	2.5	0.1	10	2.14922	7.13503e-05	1.2749e-05	-0.1083	-3.75636e-05	0.0177926	0.00509007	0.00517592	-0.00178159	0.405384	0.419946	-0.0013322	-0.0228984	0.0627772	-7.45754e-05	0.000207058	0.000875588	-0.00793281	-0.000232489	6.81432e-07	0.000310958
17	2.5	0.1	10	-3.19936	-2.91036e-05	2.15033e-05	-0.0486456	-2.7455e-05	-0.00171791	0.00330144	0.00149823	-0.00313729	0.30818	0.11341	-0.00107969	-0.0208674	0.0564156	-0.000143467	2.54832e-05	-0.000776963	0.101725	-0.000286022	0.000228364	-0.000618279
17	2.5	0.1	10	-3.73912	-0.000550427	0.00015682	0.0913409	-0.000358047	-0.00133128	0.00153794	0.000958946	-0.00263382	0.120492	0.0584453	-0.000552587	-0.0184007	0.0643737	-5.12005e-06	4.29653e-05	-0.000388591	0.0556255	-0.000206978	1.56975e-05	-0.000536149
17	2.5	0.1	10	-3.31689	-0.000308195	0.000369174	0.089709	-3.60841e-05	0.00865287	0.00408368	0.00194045	0.000958079	0.222497	0.116206	-0.000184075	-0.0162134	0.0642936	0.000392647	0.000823683	0.00108335	0.12188	-7.49411e-06	0.000484295	5.88925e-06
17	2.5	0.1	10	-0.104393	5.08235e-05	-0.00011537	-0.0803278	-0.000498751	-0.00531621	0.0020862	0.00223277	-0.00742311	0.457779	0.308538	-0.00190801	-0.0246874	0.0351252	-0.000309903	-9.89564e-05	-0.00133628	0.148928	-0.000539335	-8.79764e-05	-0.000589596
17	2.5	0.1	10	-1.52315	0.000103586	0.000329594	0.040302	0.000455966	0.00951188	0.00404851	0.00258053	-0.0012792	0.2946	0.187986	-0.00046467	-0.0157567	0.0453747	0.000313734	0.000907044	0.00070588	0.181655	-0.000297783	0.000380271	0.000249412
17	2.5	0.1	10	-4.08295	-0.000516416	0.000173613	0.14109	-0.000470217	-0.00294453	0.00367113	0.00396987	-0.00350359	0.363993	0.368218	-0.000898185	-0.0182614	0.0418759	3.67905e-05	0.000172551	-0.000620366	0.135134	-0.000237579	5.58915e-05	-0.000409028
17	2.5	0.1	10	-1.39818	-2.26668e-05	3.73437e-05	0.0534118	-0.000417677	0.00823495	0.00203052	0.00111457	-0.00328153	0.188914	0.076694	-0.00091226	-0.0215211	0.0771636	-0.000245001	0.000121767	-9.18752e-05	0.0489458	-0.000296562	0.000371593	-0.000135455
17	2.5	0.1	10	-3.67335	-0.000560355	8.29355e-05	0.0801134	-0.00028425	0.00336508	0.0026262	0.0011495	-0.00220976	0.206703	0.073911	0.000952503	-0.0160264	0.123561	0.000124182	6.81705e-05	0.00132216	-0.0651883	-0.000202767	0.000102076	-0.000265702
17	2.5	0.1	10	-1.81453	0.000178856	-3.76676e-06	0.0231428	0.000422381	0.00537803	0.0036129	0.00162302	-0.00192774	0.283523	0.113935	-0.000712612	-0.0172344	0.0438809	7.89759e-05	0.000153739	-0.00041569	0.0982186	-0.000456104	0.000457131	-0.000223952
17	2.5	0.1	10	-2.68401	-8.51271e-05	9.4732e-05	0.0327516	-0.000238685	0.00291979	0.00235229	0.00130926	-0.00160272	0.163276	0.0844812	-0.000920074	-0.019268	0.0500397	6.34695e-05	0.000428028	6.4218e-05	0.126291	-0.00018978	0.0004697	-0.000417838
17	2.5	0.1	10	1.80552	0.00157455	0.00039601	-0.0369505	0.000590887	0.0208982	0.0073659	0.0083774	0.00315029	0.367712	0.493015	4.06638e-05	-0.0161125	0.0754844	0.000312261	0.000544295	0.00167648	0.0162895	-2.87591e-06	0.000219778	0.00101456
17	2.5	0.1	10	-2.25281	-0.000108102	0.000152686	0.104549	-0.000349501	0.00239397	0.00212833	0.00124088	-0.00235803	0.166634	0.0830205	-0.000313533	-0.0149963	0.0472537	1.53511e-05	4.55392e-05	-0.000223561	0.038027	0.000117399	0.000409517	-0.000355799
17	2.5	0.1	10	1.43367	0.000836729	0.000539708	-0.0890601	0.000592977	0.0072987	0.00396807	0.00251303	-0.000725016	0.267293	0.175049	0.00128734	-0.00618768	0.0564395	0.000301577	0.000117622	0.00135788	-0.0560877	0.000573022	0.00039241	0.00044229
17	2.5	0.1	10	0.653929	-0.000254048	-7.8285e-06	-0.0270863	-0.000320844	0.00547382	0.00312052	0.00234131	-0.00595587	0.470705	0.264978	-0.00178504	-0.0255705	0.0622175	-0.000170702	8.75165e-05	-0.000746872	0.122071	-0.000399008	0.000113713	-0.000243095
17	2.5	0.1	10	-3.84413	-0.000331961	5.3775e-05	0.0133336	1.77603e-05	0.00228635	0.00377909	0.00143448	-0.00181388	0.293337	0.096609	-0.00112747	-0.0199908	0.0435346	-5.45426e-06	0.000130282	-0.000476414	0.0980538	-0.00028279	0.000180298	-0.000514645
17	2.5	0.1	10	1.05576	2.74122e-05	0.000192537	0.00320758	0.000100603	0.012702	0.00267864	0.00188529	-0.00457529	0.317552	0.173653	-0.00124757	-0.0243617	0.0947735	-1.02266e-05	0.000249251	0.000260173	0.0522306	-0.000333658	0.00024321	-1.02389e-05
17	2.5	0.1	10	-1.59545	2.85571e-05	0.000270053	0.124589	0.000212264	0.0214464	0.0054673	0.00328136	0.00257608	0.268289	0.190163	-0.000219025	-0.0179463	0.0797229	0.000543135	0.000977841	0.00129427	0.137189	-0.000231434	0.000350189	0.000281167
17	2.5	0.1	10	-0.871004	0.000163477	8.42419e-05	-0.0263642	-5.69469e-05	0.00697892	0.00160953	0.00108783	-0.00262562	0.12694	0.070436	-0.00105553	-0.0178296	0.028772	-0.000125976	0.000209176	-0.000382489	0.113268	-0.000197066	0.000166099	-0.000456856
17	2.5	0.1	10	1.00852	-0.000328755	-0.000358277	0.0639178	-0.000453585	0.00135199	0.000941991	0.00130868	-0.00428042	0.109708	0.104885	-0.00151625	-0.0228052	0.045949	-0.000291747	1.41841e-05	-0.00108382	0.151119	-0.000407726	0.000342273	-0.000523524
17	2.5	0.1	10	-3.44259	-0.000586054	4.14929e-05	0.0126031	-0.000419816	-0.00443806	0.00288864	0.00239691	-0.00504664	0.371237	0.244308	-0.0015287	-0.0247123	0.073566	-0.000233496	0.000266717	-0.00020324	0.108954	0.000185791	-0.000105272	-0.000112689
17	2.5	0.1	10	-3.02105	-3.01615e-05	-1.58245e-06	-0.216783	0.000637842	-0.00139976	0.00486087	0.0063832	-0.0055492	0.6599	0.770429	-0.00180266	-0.0267388	0.0845937	-0.000201396	4.13414e-05	0.000783344	-0.0429539	-0.000293787	-3.04663e-05	0.000177587
17	2.5	0.1	10	1.90916	-0.000322301	-0.000174347	0.0177844	-0.000328193	-0.00197913	0.00201149	0.00131595	-0.00635682	0.349454	0.132578	-0.00191847	-0.0259996	0.0550916	-0.000195762	9.36384e-05	-0.000829734	0.138521	-0.000400595	0.000199509	-0.000390036
17	2.5	0.1	10	-1.90685	-0.000276693	1.42185e-05	0.0868787	-0.000357021	0.00275082	0.00282337	0.00181773	-0.00107094	0.186695	0.122906	-0.000862224	-0.0140674	0.0137664	4.67389e-05	0.000331753	-0.000456688	0.167998	-9.31952e-05	0.000742383	-0.000375828
17	2.5	0.1	10	-3.54382	-0.000724046	1.00271e-05	0.0799208	-0.000661249	-0.00352105	0.00292336	0.00187374	-0.00522033	0.387339	0.184812	-0.00184129	-0.0272635	0.0927941	-0.000461623	-0.000441527	-0.000889325	-0.0794134	-0.000462452	-7.02213e-05	-0.00044016
17	2.5	0.1	10	-0.809177	0.000101242	8.06759e-05	-0.0261548	-0.000170647	0.00373974	0.00253383	0.00149248	-0.00308304	0.230786	0.112331	-0.00104019	-0.0204958	0.054976	-0.000234347	5.78752e-05	-0.000341106	0.0552599	-0.00021846	9.23633e-05	-0.00044461
17	2.5	0.1	10	-2.47434	-0.000272847	-0.000126934	-0.091254	-0.000671755	-0.000961952	0.00172935	0.00116353	-0.00364207	0.17166	0.0840249	-0.00148399	-0.0249346	0.0822315	-0.000463751	-0.000215604	-0.0009292	0.0222512	-0.000406185	0.00027147	-0.000419451
17	2.5	0.1	10	-1.07423	-0.000179086	1.36759e-05	0.003709	7.21202e-05	0.0155954	0.00325153	0.00251567	0.00170761	0.147069	0.14939	-0.000235368	-0.0156126	0.0562717	0.000275886	0.000779761	0.000148776	0.220199	-0.000224091	0.000572212	-0.00014951
17	2.5	0.1	10	2.23238	0.00075801	4.01581e-06	-0.158061	0.000420878	0.0153141	0.00872913	0.00765718	0.00274653	0.466225	0.460246	-0.0010366	-0.0226239	0.0834983	8.65259e-05	0.000287968	0.000954956	0.00622821	-0.000194954	0.000213598	0.000290111
17	2.5	0.1	10	-2.33055	-0.000147833	-0.000112983	-0.166485	-0.000261109	0.00345396	0.00306737	0.00252688	-0.00402461	0.32974	0.23313	-0.00154001	-0.0237028	0.0561184	-0.000180135	0.000115664	-0.00070734	0.126918	-0.000408224	0.000224504	-0.000434833
17	2.5	0.1	10	2.09554	0.000525437	0.000159627	-0.0379867	0.000320301	0.0228451	0.00754283	0.00611344	0.00340352	0.369963	0.350615	9.02488e-06	-0.0144777	0.0593225	0.000612334	0.0011871	0.000988898	0.217024	-0.000159205	0.000217269	0.000227773
17	2.5	0.1	10	-2.10071	-0.000500889	-0.000318968	0.027414	-0.000543893	-0.000944454	0.0029024	0.00105762	-0.000589765	0.17898	0.0592501	-0.00167169	-0.0247227	0.0593771	-0.000314505	0.000272291	-0.00115597	0.29056	-0.000434706	0.000260408	-0.000606844
17	2.5	0.1	10	-1.60385	-2.08423e-06	0.000132458	0.0107071	0.000193265	0.0064343	0.00421659	0.00278699	-0.00212922	0.345713	0.219491	-0.000821701	-0.0186904	0.0506	4.44996e-05	0.000147284	-0.000670368	0.133384	-0.000312749	0.000180484	-0.000395207
17	2.5	0.1	10	4.1866	-0.000147391	-0.000100479	0.0294055	-0.000222925	0.0143147	0.00489831	0.00287156	0.00178102	0.254343	0.172267	-0.000603861	-0.0195216	0.0735055	7.60375e-05	0.000626004	0.000455082	0.136856	-0.000244762	0.000300201	0.000281738
17	2.5	0.1	10	-0.306234	0.000219777	0.000213979	0.035512	-0.00017886	-0.00369683	0.00153498	0.001106	-0.00505361	0.208438	0.0888048	-0.00124619	-0.0188504	0.0253387	-0.000120267	0.000238902	-0.00101952	0.240207	-0.000247248	0.000247148	-0.000526871
17	2.5	0.1	10	-1.10394	-0.000176281	-0.000267037	-0.105858	-0.000207703	0.0191794	0.00294673	0.00139676	-0.00164718	0.215407	0.0922243	-0.000959941	-0.0215195	0.0735146	-0.000164277	0.000119637	6.93128e-05	0.0322017	-0.000343832	0.000381583	-4.33392e-06
17	2.5	0.1	10	-3.8908	-0.000423909	0.000136812	-0.114837	0.000119749	-0.00225486	0.00209005	0.0014244	-0.0050046	0.272696	0.126549	-0.00125284	-0.0221188	0.058693	-0.000282211	-0.000158755	-0.000588757	0.00474018	-0.000342498	-8.09871e-05	-0.000633399
17	2.5	0.1	10	-3.00749	-0.000165519	5.27346e-05	0.0530536	-0.000194898	0.00329834	0.00241856	0.00116033	-0.0035439	0.238438	0.0830091	-0.00106045	-0.0208857	0.0580253	-0.000211074	8.91354e-06	-0.0012233	0.178496	-0.000388947	9.13721e-05	-0.000456093
17	2.5	0.1	10	1.88631	0.000371048	0.00020572	0.0492579	3.20683e-05	0.00866478	0.00478411	0.00292115	0.00202156	0.24008	0.173036	0.000658921	-0.0119213	0.0694499	0.000316896	0.000835834	0.000905525	0.142123	0.000299445	0.000994606	0.000447056
17	2.5	0.1	10	1.78281	0.00076245	9.92006e-05	-0.0898483	0.000675732	0.00938885	0.00525285	0.0036712	-0.00153725	0.407015	0.284133	-0.00112423	-0.0230856	0.0834381	0.00016369	0.000639531	0.000628277	0.121623	-0.000305554	0.000165625	0.000140091
17	2.5	0.1	10	0.347164	-5.82989e-05	-0.00013772	-0.119168	-0.000430138	-0.00791764	0.00168643	0.00132799	-0.0064637	0.31047	0.136151	-0.00188435	-0.0261482	0.0618847	-0.000482188	-7.48522e-05	-0.00033974	0.00918436	-0.000129909	0.000231842	-0.0003945
17	2.5	0.1	10	-3.94812	-0.000662548	0.000140039	0.201956	-0.000417317	0.00352087	0.00496606	0.00180013	-0.000304612	0.329338	0.115227	0.000260689	-0.0145458	0.0723838	9.9052e-05	5.09795e-05	-0.000166453	0.0338636	-0.000264819	6.43353e-05	-0.000336119
17	2.5	0.1	10	1.25258	0.000199749	9.64769e-05	0.0286103	-1.58987e-05	0.00517106	0.00416014	0.00299668	-0.00117388	0.299647	0.220683	-0.000213933	-0.0163459	0.0638867	0.000215831	0.000522717	0.00104339	0.0552214	0.000254073	0.000577543	0.000171022
17	2.5	0.1	10	2.04994	0.00045235	-1.66151e-06	-0.0950364	0.000350117	0.00792819	0.00321732	0.00175254	-0.00217903	0.258573	0.127757	-0.000402492	-0.0180737	0.0700848	6.399e-05	0.00036642	-0.000221928	0.144515	-0.000355174	0.00021935	2.18395e-05
17	2.5	0.1	10	-0.0480419	-0.000193	-9.08203e-05	0.0563949	-0.000299274	0.00414328	0.000943442	0.000951529	-0.00190606	0.0492703	0.0550449	-0.000194637	-0.0165772	0.0671097	0.000128217	0.00066306	0.000413396	0.151801	0.000101951	0.00031095	-1.15181e-06
17	2.5	0.1	10	-1.93467	-0.000410519	-9.6453e-05	0.102067	-0.000333467	0.0110332	0.00459077	0.00259294	-0.000190589	0.296375	0.174629	-0.000730466	-0.01963	0.0663731	2.84807e-05	0.000498376	-0.00010783	0.171241	-0.000384915	0.000331226	-0.00034236
17	2.5	0.1	10	-4.28489	-0.000657767	8.14999e-05	0.0383953	-0.000354427	-0.00146088	0.00330838	0.00193994	-0.00357151	0.330672	0.16297	-0.00157553	-0.0235448	0.0506404	-8.19884e-05	0.00010849	-0.000913783	0.160139	-0.000367781	5.38814e-05	-0.000403537
17	2.5	0.1	10	2.65476	0.000581065	4.56694e-05	-0.0281493	0.000810944	0.0141748	0.00322694	0.00188184	0.00196539	0.139921	0.105731	0.000702253	-0.00883738	0.0503271	0.000732435	0.000971244	0.000363973	0.243489	-0.000237957	0.00050477	0.000334996
17	2.5	0.1	10	0.913433	0.00064314	0.000589861	-0.0259658	0.000238825	0.00299369	0.00543357	0.00579412	-0.00255737	0.479475	0.506361	-0.000723083	-0.0189394	0.0593284	1.10346e-05	0.000175022	-5.82661e-05	0.0622429	6.35668e-05	0.000193997	-0.000239234
17	2.5	0.1	10	1.39161	-2.50203e-05	7.33246e-05	0.13625	-0.000329192	0.000744931	0.00168345	0.00156379	-0.00376934	0.171568	0.12674	-0.000644701	-0.0186096	0.0608386	-0.000145503	9.11681e-06	3.347e-05	0.00177463	6.58994e-05	0.000422048	-0.000358948
17	2.5	0.1	10	0.186242	6.09403e-05	-8.66422e-05	-0.00316335	-0.000250894	-0.0010164	0.00230351	0.00140416	-0.001609	0.159305	0.0926047	-4.26381e-06	-0.0158366	0.0704579	-6.65443e-05	0.000203583	0.000197776	0.0449671	0.00012679	0.00062016	-9.11712e-05
17	2.5	0.1	10	-3.21073	-0.000270032	4.56543e-05	0.210294	-0.000211909	0.0023284	0.00373728	0.00223409	-0.00217497	0.304963	0.170828	-0.000361334	-0.0160081	0.0529351	8.10073e-05	0.000351529	-0.000922687	0.267158	-0.000299295	0.00075117	-0.000136148
17	2.5	0.1	10	-3.87018	-0.000539225	-0.000131421	0.0928498	-0.000737644	-0.00612475	0.00167132	0.00137214	-0.00619478	0.289833	0.137776	-0.00126299	-0.0223829	0.0613804	-0.000307346	-0.000137228	-0.000565007	0.0102741	6.73434e-05	0.000751373	-0.000410228
17	2.5	0.1	10	-3.19825	-0.000143822	0.000206358	0.108483	-0.000328494	-0.000487502	0.00356471	0.00235805	-0.00270929	0.313206	0.190302	-0.00118006	-0.0213125	0.0542734	-2.95924e-05	0.000289706	-0.000203237	0.116548	0.000737146	0.000604215	0.000539964
17	2.5	0.1	10	-0.218347	-0.000277429	-2.28437e-05	0.0783181	-0.000372455	0.00380345	0.00346336	0.00140583	-0.000952904	0.234828	0.088641	-0.000880969	-0.0208669	0.0708071	6.49369e-05	0.000453048	-0.000508374	0.221078	-0.000267199	0.000186167	-0.000292848
17	2.5	0.1	10	0.230612	-0.000305497	-0.000196863	0.00205576	-0.000264157	0.0047982	0.00264389	0.00117579	-0.000485086	0.155939	0.0680805	-0.000764014	-0.0198876	0.0670865	-8.76034e-05	0.000207952	-0.000586151	0.143143	-0.000438882	0.000297007	-0.000389229
17	2.5	0.1	10	2.05363	5.21506e-05	-0.000136764	-0.0829336	0.000309169	0.00425977	0.00320614	0.00151067	-0.00297953	0.291524	0.113116	-0.00102828	-0.021283	0.0652602	-1.62459e-05	0.000259586	-3.10779e-05	0.0857613	-0.000356491	0.000200465	-0.000235276
17	2.5	0.1	10	-1.70796	0.000154861	7.54499e-05	-0.00815665	0.000603345	0.00795055	0.00320832	0.00111943	-0.00169789	0.239597	0.0687486	-0.000582148	-0.0186958	0.0656487	0.000265094	0.000691852	0.000139454	0.195497	-0.000416196	0.00105417	-0.000115571
17	2.5	0.1	10	-3.27209	-0.000540546	-0.000179453	0.080318	-0.000293989	0.00294517	0.00325169	0.00180752	-0.00476365	0.395297	0.168069	-0.00115244	-0.0220349	0.0655523	-0.000168657	-0.000135051	-0.000568177	0.0114384	-0.000398844	0.000186751	-0.000455873
17	2.5	0.1	10	1.16826	0.00146031	0.000157678	-0.0838511	0.000831035	0.00126337	0.00484268	0.00355046	-0.00155468	0.373096	0.27429	0.00030921	-0.0166909	0.0962206	0.000244484	0.000500533	0.000649885	0.0835613	-0.000340035	0.000349462	0.000573149
17	2.5	0.1	10	1.50612	0.000104896	-0.000239292	0.00980549	-0.000217361	0.00859233	0.00359025	0.00207385	-0.00235285	0.299468	0.158769	-0.00104684	-0.022313	0.0779317	-0.000155824	9.75188e-05	6.56935e-05	0.0258346	-0.000360327	0.000152872	-4.08884e-05
17	2.5	0.1	10	-0.463239	-0.000651852	-0.000139057	0.11123	-0.000721923	0.00851496	0.00298839	0.00161029	-0.00280847	0.263169	0.120981	-0.0012205	-0.0228723	0.0718743	-0.000134002	6.36571e-05	-0.000500498	0.0769888	-0.000437785	0.000169272	-0.000101182
17	2.5	0.1	10	-3.93732	-0.000793955	-0.000173407	-0.0850995	-3.03185e-05	-0.0081689	0.00398054	0.00303103	-0.00559365	0.551153	0.342287	-0.00209458	-0.0274325	0.0624106	-0.000353193	-5.72923e-05	-0.000982708	0.0998959	-0.000560751	0.000233907	-0.000541421
17	2.5	0.1	10	-2.9635	-0.000166009	1.43161e-05	0.0923012	-8.26372e-05	0.00720204	0.00399225	0.00167059	-0.00111537	0.283614	0.111265	-0.00140714	-0.0225436	0.0516943	7.96208e-06	0.000460955	-0.000710188	0.264391	-0.000359177	0.000230382	-0.000339803
17	2.5	0.1	10	-1.04202	-7.93323e-05	8.65434e-05	0.203764	-0.000262108	0.00800594	0.00571471	0.00383359	0.000379461	0.358397	0.258405	-0.000475651	-0.0172367	0.0574925	0.00019882	0.000480634	1.37251e-05	0.148841	-0.000257258	8.25264e-05	-0.00023634
17	2.5	0.1	10	-1.45911	0.00111067	0.000317156	0.00151258	0.000954029	0.00508113	0.00500582	0.0041094	-0.000683141	0.347767	0.3006	0.000662495	-0.00722198	0.03975	0.000332784	0.000276874	0.000788186	0.0153714	-0.000147513	0.000722697	-0.000212689
17	2.5	0.1	10	-0.277956	-0.000170725	-4.67803e-05	0.0554874	-0.000255886	0.00697925	0.00229184	0.00126541	-0.000944041	0.140059	0.077265	-0.000203396	-0.0175509	0.076374	0.000174261	0.000679633	0.000985976	0.0970106	9.81669e-05	0.000602304	4.35313e-05
17	2.5	0.1	10	-1.00097	-0.000130944	-8.08749e-05	0.0718215	3.18086e-06	-0.000112741	0.0054195	0.00357758	-0.00369475	0.555988	0.33456	-0.00155883	-0.0237455	0.0550259	6.30212e-06	0.000459021	-0.000762167	0.275084	-0.000529456	0.000512441	-0.000335321
17	2.5	0.1	10	1.27004	-0.000138821	-0.000149641	0.00477221	-0.000101529	0.00792772	0.00443597	0.00275267	-0.0022486	0.371161	0.218596	-0.000833385	-0.0205823	0.0706376	-4.61664e-05	4.99007e-05	2.36645e-05	0.015159	-0.00040702	7.03783e-05	-4.548e-05
17	2.5	0.1	10	-0.708532	-0.00019809	-0.000125734	-0.00478339	-0.000377235	-0.00106265	0.00106636	0.000818021	-0.00345396	0.0979017	0.0477837	-0.000711871	-0.020283	0.0754339	-0.000211339	-5.37925e-05	-7.96803e-05	-0.00805113	1.16007e-05	0.000489181	-0.000249827
17	2.5	0.1	10	1.70839	0.000538397	0.000136099	-0.0391428	0.000818746	0.00991104	0.00380454	0.00186104	-0.000745432	0.255042	0.123561	0.000639136	-0.0117799	0.0675092	0.00034214	0.000617519	0.00200076	0.0118824	-0.000337936	0.000198621	7.38368e-05
17	2.5	0.1	10	-0.979783	0.000167327	-3.81912e-05	-0.0326454	0.000552304	0.00243503	0.00373001	0.00168435	-0.00354698	0.372421	0.136514	-0.000873844	-0.0206577	0.0686931	5.22859e-05	0.000377864	-0.000375113	0.171331	-0.000470399	0.000643568	-0.000256593
17	2.5	0.1	10	1.26309	3.99049e-05	-0.000165074	-0.0112435	-0.000350875	-0.00341272	0.00161663	0.00101956	-0.00388433	0.168803	0.0705695	-0.000949361	-0.0210749	0.0684628	-0.00019121	0.000224149	-1.12228e-05	0.0724934	-5.14357e-06	0.000360902	-0.000217512
17	2.5	0.1	10	-2.11525	-0.000476328	-0.000243597	0.029923	-0.000137301	0.00521294	0.00174196	0.000938621	-0.00358396	0.170846	0.0605734	-0.000904046	-0.0205773	0.0655605	-4.98781e-05	-3.43313e-05	-0.00028685	0.0177436	-0.000347002	0.000263537	-0.000329346
17	2.5	0.1	10	1.91782	0.00255415	5.65315e-05	-0.163561	0.0016154	0.0227001	0.00750578	0.0105724	0.00296426	0.38256	0.633052	0.000221662	-0.018286	0.110446	0.000629201	0.00097933	0.00261904	0.0428205	-0.000175084	0.000383368	0.00114751
17	2.5	0.1	10	0.935504	0.000819679	-0.000292471	-0.099591	0.000235287	0.00369998	-0.00105073	0.000710758	-0.000741512	-0.130331	0.0322587	-0.000118465	-0.0133749	0.0448378	-0.000120428	-3.43842e-05	-0.000814562	0.0828943	-0.000301065	0.000540018	-5.4656e-05
17	2.5	0.1	10	-1.11345	0.000387991	-0.000112696	0.080211	0.000429466	0.0275646	0.00299526	0.00192951	0.00332988	0.0996783	0.101181	0.00141017	-0.0116934	0.100418	0.000378684	0.000692866	0.00111481	0.0888598	-0.000116229	0.000558545	0.000700132
17	2.5	0.1	10	-0.139687	0.00115184	0.000385077	-0.105078	0.000144048	0.00696871	0.00662456	0.00888025	0.00214825	0.35542	0.556375	-0.000881448	-0.0244862	0.133164	-0.000122948	0.000259165	0.000812116	0.00923852	-0.000245131	0.000203569	-4.4617e-05
17	2.5	0.1	10	1.88791	-0.000403737	-0.000181337	0.071333	-0.000247405	0.0141449	0.00550441	0.00337484	-9.41078e-05	0.361842	0.232477	-0.000583526	-0.0186955	0.0655592	0.000291499	0.000738411	0.000520379	0.159557	-0.000355336	0.000286865	0.000115723
17	2.5	0.1	10	1.64507	6.85309e-05	-0.000272243	-0.0013139	-0.000176602	0.00894411	0.00411584	0.00190278	-0.000701499	0.278145	0.126486	-0.000515139	-0.0188716	0.071786	2.4773e-05	0.000601087	0.00026848	0.151999	-0.000341712	0.000137536	4.35187e-05
17	2.5	0.1	10	-0.474011	0.000133918	-7.46392e-05	-0.0509939	-0.000181292	-0.000704766	0.00188031	0.00130068	-0.00482392	0.238438	0.109668	-0.00112699	-0.0218608	0.0652252	-0.000249143	-0.000139294	9.19771e-06	-0.0419219	2.99491e-06	0.00073191	-0.000405721
17	2.5	0.1	10	1.11683	0.000258474	7.78131e-05	0.0898946	6.92447e-05	0.0227646	0.00837338	0.00399286	0.00823482	0.284861	0.177252	-0.000271066	-0.019404	0.0939315	0.000214963	0.000864033	0.00105949	0.133525	-0.000130615	0.000418828	0.00040898
17	2.5	0.1	10	1.50551	0.00106213	6.61024e-05	-0.0541388	0.000739128	0.0141043	0.0072147	0.00788146	0.00320074	0.356897	0.461583	0.000612828	-0.015549	0.100095	0.000318569	0.00090634	0.00128998	0.121767	-0.000113248	0.000463068	0.00052488
17	2.5	0.1	10	1.49458	0.000285024	5.42532e-05	0.0037808	0.000495501	0.00758614	0.00135441	0.00136046	-0.00165578	0.0794755	0.0891757	-0.00012166	-0.00931492	0.0207537	0.000432894	0.000898084	0.000191939	0.248457	-0.000405928	0.00013685	-0.000216856
17	2.5	0.1	10	-0.889991	-1.14318e-05	-0.000182645	0.0363282	-7.46377e-05	0.0112529	0.00115651	0.000989179	-0.000944122	0.0485067	0.0549896	-0.000276128	-0.0190286	0.0888385	-5.1077e-05	0.000393584	0.000337906	0.0854289	-0.00037121	0.000623674	-7.91568e-05
17	2.5	0.1	10	-5.01344	-0.00078381	-9.35836e-06	-0.02218	-0.000423582	-0.00549374	0.00189965	0.00109068	-0.00602298	0.309944	0.0964583	-0.00146384	-0.0233296	0.0575406	-0.00013648	-0.000206021	-0.00137719	0.100638	-0.000606074	0.000298955	-0.000664722
17	2.5	0.1	10	-3.3207	-0.000909478	-0.00021165	0.0427667	-0.000247604	0.000625991	0.00290799	0.00116984	-0.0044213	0.334632	0.0907425	-0.00123473	-0.0224463	0.0645539	-0.000147034	-0.000228901	-0.000963216	0.0209304	-0.000425997	1.12486e-05	-0.00038956
17	2.5	0.1	10	1.23515	-0.00038706	-0.000294566	-0.00619074	-0.000279187	0.00377264	0.00236421	0.00116513	-0.00511284	0.31198	0.0965177	-0.00157041	-0.0243089	0.0625973	-0.000258097	-0.000160613	-0.000974361	0.0526897	-0.000466599	2.95559e-05	-0.000515532
17	2.5	0.1	10	1.71081	4.7059e-05	-0.000238447	0.067372	-1.89539e-05	0.0156172	0.00656187	0.00679871	-0.000267972	0.449938	0.497193	-0.000154896	-0.0168053	0.071529	0.000170663	0.000306509	0.00055291	0.0416111	-0.000321576	8.82651e-05	0.000454457
17	2.5	0.1	10	1.73915	-0.00014256	-0.000102035	0.00731497	6.76748e-05	0.019011	0.00262184	0.00158042	0.000193248	0.137374	0.0953188	0.00062999	-0.0110184	0.061575	0.00019875	0.000396436	0.000410535	0.0789105	-0.000318675	0.000130371	0.000205164
17	2.5	0.1	10	1.04028	0.000752621	0.000173344	-0.000853749	0.000609379	0.0333741	0.00911423	0.00985231	0.00678282	0.355352	0.480057	0.000938911	-0.0133576	0.0943292	0.000548797	0.000724388	0.00145068	0.0690835	-0.000132581	0.000591393	0.000660338
17	2.5	0.1	10	-0.390014	0.000969974	0.000140253	0.0285026	0.000325377	0.00359165	0.00351671	0.00213072	-0.00120642	0.247931	0.149893	0.000286333	-0.0128023	0.0594313	0.000314331	0.000635842	0.00021819	0.168385	-0.000168797	0.000566575	-0.000306385
17	2.5	0.1	10	-2.76471	-0.000759133	-9.12915e-05	0.0482773	5.95433e-05	0.0125672	0.00434772	0.00163931	4.6014e-05	0.269771	0.100597	-0.000389331	-0.0184786	0.07527	0.000290489	0.000906914	0.000916412	0.158155	-0.000344583	0.000226584	7.48142e-05
17	2.5	0.1	10	-0.766536	-0.000382966	-0.000374592	-0.0364035	-0.00015518	0.00306236	0.00150202	0.000922835	-0.00649327	0.285682	0.0775393	-0.00202666	-0.0273411	0.069594	-0.000383939	-0.000115633	-0.00140009	0.154791	-0.000492999	9.84409e-05	-0.00066875
17	2.5	0.1	10	1.26743	-2.7742e-05	-3.52809e-05	0.0785104	-8.42478e-05	0.0173965	0.00534197	0.00521406	3.0901e-05	0.344614	0.367951	0.000412564	-0.0196863	0.1433	6.61329e-05	0.000320417	0.000789581	0.0261006	-0.00018818	0.000387522	0.000488739
17	2.5	0.1	10	0.426187	-0.000246323	-0.000234601	0.0210978	-0.000166475	0.0132696	0.0032672	0.00131747	-0.00139062	0.233684	0.0839387	-0.00023911	-0.0180717	0.0799067	-9.6865e-06	2.09221e-05	-0.000190152	0.0264283	-0.000384504	0.000136532	-5.10709e-05
17	2.5	0.1	10	0.973311	-1.46049e-05	-0.000167414	0.00935796	0.000178806	0.0217622	0.00668747	0.00487075	0.000393748	0.42864	0.333645	-0.000242475	-0.0177532	0.0762307	0.000371324	0.00055737	0.000826175	0.0817464	-0.000337051	0.000479919	0.000439576
17	2.5	0.1	10	-3.15965	-0.000819339	-0.000176459	0.0463076	-0.000137699	0.00670695	0.00531568	0.00374825	-0.00283444	0.485697	0.324657	-0.00106054	-0.0219466	0.0715936	0.000173745	0.000573647	-0.000162571	0.203839	-0.000396086	0.000145251	-0.000264022
17	2.5	0.1	10	1.46087	-0.000285454	-0.000148108	0.142312	-6.18519e-05	0.0182361	0.00411431	0.00150326	0.000664176	0.233172	0.0871171	-0.000368113	-0.0168502	0.0600077	0.000213014	0.000654797	0.000427066	0.147926	-0.000377936	0.000314077	8.62298e-05
17	2.5	0.1	10	1.45813	-3.29176e-05	-0.000144741	0.0912047	-0.000266494	0.010267	0.00275124	0.00168535	-0.000390073	0.161746	0.107026	0.00128579	-0.0184141	0.177603	6.52149e-05	0.000185057	0.00217468	-0.0775402	8.48982e-05	0.000375814	0.000604895
17	2.5	0.1	10	-0.428786	0.000148175	0.000108297	0.101288	-0.00025081	-0.00209739	0.0052097	0.00572631	-0.00300709	0.486597	0.521168	-0.00105979	-0.0208994	0.0582349	2.33589e-05	0.000666344	-0.000258086	0.250594	-0.000139889	0.000456282	-0.000466242
17	2.5	0.1	10	1.02614	-0.000210364	-0.000337314	0.0479455	-0.00039654	0.00290179	0.00436811	0.00358323	-0.00150433	0.330655	0.275956	-0.000743989	-0.0202253	0.0724908	7.07557e-06	0.000512615	-0.000421247	0.226723	-0.000473173	0.000218036	-0.000430432
17	2.5	0.1	10	-3.45649	-0.000587262	0.000186734	0.0124634	0.000410425	0.00456246	0.00739892	0.00645756	-0.00249101	0.656504	0.564483	-0.001297	-0.0212416	0.044725	6.13909e-05	0.00031233	-0.000613221	0.187408	-0.00046161	-1.44066e-05	-0.000263065
17	2.5	0.1	10	1.24602	-1.87401e-05	-0.000125508	0.0039694	-0.000193077	0.0120033	0.00463737	0.00344267	-0.00147658	0.352144	0.263502	-0.000702021	-0.0196628	0.0686421	0.000110224	0.000572662	1.65858e-05	0.176805	-0.000410528	0.000250781	0.000155669
17	2.5	0.1	10	-1.02953	0.00023394	-4.58759e-05	-0.0152056	0.000350816	-0.000943013	0.00171849	0.00127748	-0.00629534	0.303255	0.126097	-0.00104102	-0.0195035	0.0444692	1.97606e-05	0.000209905	-0.000963954	0.214642	-0.000559908	0.000252892	-0.00059939
17	2.5	0.1	10	-1.53481	-0.000417641	-0.000304234	0.0664678	-0.000263316	0.0115987	0.00371027	0.00209044	-0.00270114	0.326502	0.165025	-0.00101435	-0.0217489	0.072469	-0.000124824	3.99716e-05	-0.000353834	0.050522	-0.000509716	0.000223065	-0.000113272
17	2.5	0.1	10	1.98786	0.000184674	-9.27311e-05	-0.0931182	0.000179241	0.00744155	0.00495028	0.00384675	-0.00368401	0.506597	0.362066	-0.00151774	-0.0237062	0.0582004	-5.20482e-05	0.000316044	-0.000468464	0.164223	-0.0005023	8.61151e-07	-0.000107955
17	2.5	0.1	10	1.12934	0.000265886	-9.0119e-05	-0.0194905	-0.00016796	0.00603162	0.0041107	0.00402025	-0.00312507	0.386779	0.360072	-0.00111955	-0.0237895	0.0960434	-0.000258108	7.73588e-05	8.51155e-05	0.0179589	-0.000401344	0.000107986	-7.03761e-05
17	2.5	0.1	10	1.21221	-0.000416259	-0.000339636	0.000625945	-0.000274078	0.00059778	0.00396034	0.00231641	-0.00451814	0.459524	0.22147	-0.00172315	-0.02538	0.0654549	-0.000228216	3.85403e-05	-0.000729543	0.0996969	-0.000553014	7.24026e-05	-0.000325817
17	2.5	0.1	10	-0.0931763	0.000171185	-0.000119203	-0.0811718	-0.000204148	0.000539407	0.0027685	0.00244237	-0.00481775	0.342296	0.24349	-0.000417026	-0.018018	0.0686274	-0.000159453	2.28689e-05	-0.000315674	0.040319	-0.000110804	0.000939454	-0.000264941
17	2.5	0.1	10	-4.24427	-0.000725253	-0.000249965	-0.0250961	-0.000220242	0.00405695	0.00317988	0.00206113	-0.00195086	0.246463	0.152587	-0.000569701	-0.0201079	0.08303	8.12606e-05	0.000278981	-0.000615874	0.175128	-0.000495206	0.000425108	-0.000475684
17	2.5	0.1	10	0.366426	0.000198922	0.000105762	0.0047944	0.000266683	0.0127462	0.00456664	0.00265407	-3.64353e-05	0.28902	0.177376	-6.59265e-05	-0.0166478	0.0749245	0.000482154	0.00113387	0.00117246	0.184185	-0.00022778	0.000184556	-7.33057e-05
17	2.5	0.1	10	-1.93992	-0.000508107	-0.000323808	-0.0126931	-0.000488673	0.0067164	0.00152327	0.00116338	-0.0042232	0.171604	0.0883935	-0.000932071	-0.0236586	0.110682	-0.000337941	-0.000164906	-0.000522986	-0.00446364	-0.000492988	-1.0083e-05	-0.000243632
17	2.5	0.1	10	-3.58466	4.46733e-05	0.000718706	0.0459832	0.000773927	0.0186167	0.00898948	0.0121476	0.00356656	0.450184	0.70419	0.000267951	-0.0164687	0.0914992	0.000589442	0.000710173	0.00147391	0.0643356	-0.000157284	0.000139833	6.41214e-07
17	2.5	0.1	10	-2.57379	-0.000412648	-0.000368375	-0.05995	-0.000503295	-0.00509309	0.00307928	0.00305112	-0.0063048	0.497201	0.378182	-0.00197819	-0.0276005	0.082848	-0.000414825	-0.000198211	-0.00137144	0.103659	-0.000656069	0.000409724	-0.000707865
17	2.5	0.1	10	-0.640388	-5.89484e-05	3.7379e-05	-0.00511361	-0.000164846	-0.00331032	0.0029105	0.00212914	-0.00662154	0.504097	0.25815	-0.00168748	-0.0252117	0.0661952	-0.000190021	0.00024815	-0.00121823	0.296237	-0.000556331	0.00030888	-0.000670918
17	2.5	0.1	10	-0.630703	-0.000219554	-6.99689e-05	0.137974	9.06741e-05	0.00507252	0.00254193	0.00274519	-0.00251128	0.209744	0.222837	-0.000448102	-0.0169386	0.0563179	0.000315968	0.000594089	-0.000402834	0.252234	-0.000494246	0.000703977	-0.000434513
17	2.5	0.1	10	-0.461797	0.000213695	-7.84798e-05	-0.0268797	6.72365e-05	0.00387802	0.00514427	0.00351364	-0.000199195	0.338794	0.244772	-0.000389208	-0.0187133	0.077927	0.000140237	0.000666083	-0.000237396	0.246835	-0.000448953	0.000169676	-0.000528986
17	2.5	0.1	10	-4.81073	-0.000588097	-0.000237698	-0.0336344	-0.000596025	-0.00229056	0.000140817	0.000739882	-0.00225136	-0.01588	0.0372069	-0.000428497	-0.0209493	0.104837	-0.0002036	-6.21072e-05	-0.000514146	0.0324841	-0.000561812	-2.57087e-05	-0.00087612
17	2.5	0.1	10	0.896586	0.000189642	3.39731e-05	0.0616694	0.000517022	0.00586855	0.0064821	0.00709557	-0.0014343	0.50513	0.569316	-2.56652e-05	-0.0147126	0.0595162	0.000561111	0.000723334	0.000410914	0.168649	-0.000433811	0.00106017	-0.000179791
17	2.5	0.1	10	0.097386	-0.00045303	-0.00033905	0.0710734	-0.0003969	0.00617591	0.00233209	0.0012668	-0.00125549	0.151687	0.0789785	-0.00142923	-0.0235752	0.064253	-0.000148447	0.000188236	-0.000408262	0.109445	-0.000557512	0.000207479	-0.000266855
17	2.5	0.1	10	0.224906	0.00018893	-0.000121572	-0.015153	0.000319826	0.0119873	0.00460894	0.0032604	-0.00319652	0.43988	0.287626	-0.00105735	-0.0218778	0.070894	0.000202935	0.000595249	-0.00033297	0.239786	-0.000514193	1.15239e-05	-1.83215e-05
17	2.5	0.1	10	1.24299	-0.000297476	-0.000292999	-0.0115613	1.85173e-05	0.00412522	0.00508419	0.00438082	-0.00402039	0.545802	0.431857	-0.00106963	-0.0211798	0.0608948	-8.0189e-05	5.42715e-05	-0.000582862	0.0845686	-0.000604694	0.000184256	-0.000365522
17	2.5	0.1	10	-0.31559	0.000165672	-0.000123048	-0.116068	-0.000196242	-0.00294246	0.000230009	0.000756991	-0.00437063	0.0333043	0.0443122	-0.000781306	-0.0229243	0.110048	-0.000414664	-0.000194697	-0.000513488	-0.0163943	-0.000519439	0.000250587	-0.000477656
17	2.5	0.1	10	-0.238648	-0.000412801	-0.000262494	0.055828	-0.000170675	0.00797894	0.00405581	0.00225679	-0.00161791	0.30899	0.165371	-0.00126996	-0.0222431	0.0589504	7.76605e-05	0.000371455	-0.000130895	0.133653	-0.000502779	0.000120998	-0.000153216
17	2.5	0.1	10	1.04242	0.000712458	6.41764e-05	0.0285971	0.00107407	0.0199325	0.0071956	0.00468491	0.00120578	0.429479	0.303101	0.000694081	-0.0102878	0.0592192	0.0010499	0.00121668	0.00100316	0.222334	-0.000349409	0.000614741	0.000355696
17	2.5	0.1	10	-0.514722	0.000312236	-0.000179943	-0.100288	-0.000135218	-0.00316856	0.00293041	0.00265257	-0.00390411	0.3087	0.243661	-0.00121952	-0.0245211	0.100671	-0.000284873	3.93438e-05	-0.000397491	0.0554034	-0.000553006	0.000538443	-0.000377023
17	2.5	0.1	10	-3.17475	-0.000386084	-4.14348e-05	0.120343	8.50758e-05	-0.00144149	0.0031976	0.00221987	-0.00395781	0.339971	0.198872	-0.000598576	-0.0181327	0.0588513	0.000357206	0.000593359	-0.000680177	0.309896	-0.000510084	0.000626788	-0.000426771
17	2.5	0.1	10	0.508262	0.000348859	-8.40467e-05	-0.0476611	0.000836795	0.0033208	0.00259771	0.00111287	-0.000773019	0.160006	0.0642866	-0.000224391	-0.0113822	0.0274862	0.000512117	0.000736173	-0.000353602	0.292505	-0.00035874	0.000760767	-0.000360689
17	2.5	0.1	10	1.8931	0.000106739	0.000432469	0.117032	0.000159905	0.00829571	0.00695496	0.0100155	0.00048665	0.443877	0.703469	-8.38432e-05	-0.013282	0.0458062	0.000544632	0.000508353	-5.75496e-05	0.167224	-5.0306e-05	0.000138882	-6.71936e-05
17	2.5	0.1	10	2.68964	-0.000190856	8.66359e-05	0.0600038	-0.000310743	0.0123077	0.00524202	0.00280909	-7.07658e-05	0.341118	0.189474	-0.00165123	-0.0241675	0.0526493	-0.000189332	0.000381336	0.000116596	0.105973	0.0001472	-0.000115872	0.000430071
17	2.5	0.1	10	-2.99379	-0.000771425	0.000125415	0.124098	-0.000396843	0.0116429	0.00403512	0.00347912	-0.00255637	0.349788	0.291734	-0.00101515	-0.0195873	0.047014	5.71379e-05	0.00021639	-4.476e-05	0.0737752	8.44479e-07	-6.96886e-05	0.000365712
17	2.5	0.1	10	2.22375	-5.98075e-05	8.15387e-05	0.0417565	-0.000452488	0.0113697	0.00102011	0.0013962	-0.00497051	0.14308	0.122728	-0.00125073	-0.0227513	0.067545	-0.000366725	-1.68245e-05	-0.000185901	0.0136011	-3.21806e-05	-0.000139275	-0.000189296
17	2.5	0.1	10	3.17657	-0.00013639	0.000190674	-0.0911332	-0.000261507	0.0180572	0.00351927	0.00298145	-0.00242715	0.296244	0.242877	-0.000614549	-0.0186367	0.0629993	-0.00014164	0.000259683	0.000368776	0.0450856	4.43856e-05	1.38183e-05	0.000360976
17	2.5	0.1	10	2.64127	0.0001266	0.000220667	0.00852741	0.000399499	0.0222296	0.00375097	0.00299558	-0.00331459	0.361664	0.264431	-0.00047391	-0.0141777	0.0333537	-3.02152e-05	-0.000119807	0.000273189	-0.0543447	0.000195824	4.97767e-05	0.000344174
17	2.5	0.1	10	1.41342	1.6204e-05	0.000151821	0.0294292	-6.98118e-05	0.027298	0.00463192	0.00268472	7.06448e-05	0.290126	0.178366	0.000216402	-0.0105656	0.0412922	0.000377268	0.000421679	0.000572402	0.0702455	0.000327003	0.000270761	0.000580972
17	2.5	0.1	10	2.36444	8.06866e-05	0.000124512	0.0220489	-3.30614e-05	0.0110341	0.00459327	0.0049431	-0.00051319	0.308598	0.361792	-0.00046006	-0.0138085	0.0315728	0.000192999	0.000451528	-0.00047065	0.213669	0.000254098	0.00019235	-0.000187866
17	2.5	0.1	10	-0.905864	0.000329324	0.000335175	0.0819134	-0.000154864	0.0153118	0.00443108	0.00336342	0.000369394	0.265195	0.224301	0.000208564	-0.0115646	0.0472689	0.000100243	0.000390672	0.000520319	0.0668506	0.000396422	-0.000139065	0.000361368
17	2.5	0.1	10	-3.16098	-0.000541491	0.000199993	0.040981	-8.93332e-05	0.0187809	0.00500317	0.00547092	-0.00152131	0.385103	0.435986	-0.000905458	-0.0193728	0.0520554	8.38602e-05	0.000150593	0.000506121	0.00391792	7.97749e-05	-1.8622e-05	0.00053445
17	2.5	0.1	10	3.5461	0.00102622	0.000520946	-0.0599053	0.000570546	0.00536268	0.00246692	0.00267355	-0.00322001	0.229762	0.230296	-0.000138658	-0.0152661	0.0583793	8.19319e-05	-1.24072e-05	0.000876409	-0.0614273	0.0003132	-9.6552e-05	0.000146548
17	2.5	0.1	10	4.55305	0.00169713	0.00096577	-0.00352597	0.00107996	0.0402407	0.00834095	0.0126109	0.00569326	0.345492	0.651562	0.00198312	-0.00497593	0.0732917	0.000734501	0.000679991	0.00297734	-0.0240677	0.000717307	0.000127448	0.00176247
17	2.5	0.1	10	3.21862	-1.34235e-05	4.30069e-05	0.0523287	-0.000431527	0.0106522	0.00297958	0.00306815	-0.00163232	0.217707	0.234828	-0.00095867	-0.0187801	0.0428565	-8.09206e-05	0.000263652	4.5304e-05	0.0784598	0.000346041	7.04234e-05	-4.82743e-05
17	2.5	0.1	10	-2.53533	-0.000294295	0.000294659	0.0782058	0.000267597	0.00795879	0.00188626	0.00108658	-0.00485676	0.240766	0.0848097	-0.000930243	-0.0190462	0.0471904	7.34975e-06	4.62893e-05	-0.000834858	0.119651	1.79119e-05	5.49694e-05	-0.000164749
17	2.5	0.1	10	1.12149	2.49618e-05	4.52548e-05	-0.00523904	0.000104144	0.00378298	0.00216435	0.00188029	-0.00310383	0.195545	0.150397	-0.000914298	-0.0189411	0.0471888	-8.04394e-05	0.000164151	-0.000244335	0.0799662	-0.000163157	4.4409e-05	-0.00029442
17	2.5	0.1	10	0.678792	5.28448e-05	0.000125179	0.121893	0.000561473	0.031772	0.00453212	0.00442295	0.000353053	0.273105	0.3019	0.00104708	-0.00934752	0.0670695	0.000506404	0.000826341	0.00119047	0.112728	0.000122742	0.000157743	0.000715614
17	2.5	0.1	10	0.443794	-0.000245596	2.0722e-05	-0.0373068	-0.000300477	0.014117	0.00212286	0.00156351	-0.00316599	0.193775	0.120101	-0.0014587	-0.0222264	0.0435631	-0.000205634	6.44048e-05	-1.53335e-05	0.023258	0.000220683	-0.000173854	0.000107642
17	2.5	0.1	10	-2.27693	-0.000229646	0.000360025	0.156399	-0.000214822	0.0103595	0.00135621	0.00111428	-0.00294556	0.112086	0.0746785	-0.000799482	-0.0165684	0.0336121	-9.78161e-05	0.000176864	0.000899327	-0.0168118	0.000338146	-0.000192505	0.000187415
17	2.5	0.1	10	-1.29649	-0.000369825	-0.000107548	0.128897	6.57893e-06	0.0324411	0.0024917	0.00181649	0.00181385	0.0946372	0.102326	0.000240377	-0.012305	0.0537247	0.000475412	0.000913356	0.000663867	0.188263	-3.7427e-05	0.000484845	0.000334707
17	2.5	0.1	10	2.73106	0.000365749	0.000108291	0.0743316	0.000444472	0.0305976	0.00145327	0.00161662	0.00127846	0.0337558	0.0918478	0.00210839	0.00179614	0.0436572	0.000834698	0.00091911	0.0018136	0.0825279	0.000388227	7.95511e-05	0.000904873
17	2.5	0.1	10	3.91739	0.000595777	0.000385934	0.0145982	3.50294e-05	0.0214921	0.00489319	0.00529428	0.000483502	0.294922	0.362206	0.000578205	-0.0127257	0.0721581	0.00026723	0.000382035	0.000466471	0.0695752	0.000206044	0.000113569	0.000549409
17	2.5	0.1	10	2.17475	0.000113269	5.4181e-05	0.0682922	0.000401908	0.0264497	0.00437921	0.0033161	-0.00302118	0.407064	0.288394	-0.000240026	-0.0147074	0.0487352	0.000427524	0.000821473	0.000219333	0.222048	0.000166519	0.000209546	0.000422335
17	2.5	0.1	10	-3.01677	-0.000518541	0.000186161	0.0573637	0.000226385	0.0213134	0.00378537	0.00226044	0.000862235	0.204229	0.13941	0.00030246	-0.0121509	0.0553968	0.000156733	0.000137898	0.000981031	-0.0311821	0.0002519	0.000120705	0.00061218
17	2.5	0.1	10	3.47395	0.000300323	0.000182284	-0.0536139	0.000344553	0.0235946	0.00587269	0.00764279	-0.00192772	0.481452	0.641195	0.000183547	-0.0106048	0.040165	0.000188097	-6.93177e-05	0.000614322	-0.0612884	0.000267245	1.68848e-05	0.000646261
17	2.5	0.1	10	-3.97788	-0.000760248	-3.40431e-05	0.191354	-0.00067048	-0.00590044	0.000745333	0.00089232	-0.00708125	0.208782	0.0785203	-0.00184793	-0.024177	0.034045	-0.000316238	-0.000167239	-0.00180112	0.240855	-0.00038802	-0.000145136	-0.000620022
17	2.5	0.1	10	3.22209	0.000257289	0.000332229	0.0580463	-0.000204362	0.0217528	0.00235095	0.00142402	-0.00147492	0.159445	0.093403	-3.51089e-05	-0.0130618	0.046527	4.85396e-05	0.000169182	0.00029776	0.0259901	0.000384506	-2.23071e-06	0.000351419
17	2.5	0.1	10	2.79034	0.000266413	4.1916e-05	0.136147	0.000231115	0.0256623	0.00321226	0.00198223	-0.000541034	0.201806	0.131296	0.000916193	-0.00522247	0.0385514	0.000563265	0.000554921	0.000351767	0.129052	0.000296304	0.000185337	0.0005605
17	2.5	0.1	10	-0.502902	-0.000193532	-1.71036e-05	0.148307	0.000277171	0.0217128	0.0041805	0.00311031	-0.00283746	0.377852	0.264032	-0.000486436	-0.0169348	0.0541219	0.000419643	0.000789004	-0.000289027	0.297885	0.000180165	0.000388255	0.000372713
17	2.5	0.1	10	4.09676	0.0017994	0.000601819	-0.0302506	0.000840115	0.0292795	0.00587285	0.00496748	0.00422439	0.24912	0.269718	0.0022683	-0.00182151	0.0648731	0.000628059	0.000635838	0.00136545	0.0563014	0.000397112	0.000291204	0.000455878
17	2.5	0.1	10	0.190092	3.71648e-05	0.000105772	0.00952476	0.00026002	0.0298543	0.00433372	0.00335865	-0.00230347	0.36465	0.274489	-0.000246946	-0.0129862	0.0362307	6.01648e-05	8.00129e-05	-0.000260438	0.0535912	0.000202248	0.000238887	0.000407735
17	2.5	0.1	10	1.75688	0.000713044	9.30523e-05	0.0303095	0.00106623	0.0381386	0.000628183	0.00134186	0.00324794	-0.0415874	0.0661903	0.00224357	0.0144714	0.00812016	0.00111418	0.0012991	0.00175041	0.163427	0.000244744	0.000344713	0.000880728
17	2.5	0.1	10	-2.87599	-0.000387329	-4.62937e-05	-0.059819	2.79104e-05	0.0166703	-0.000631523	0.000758797	-0.0023842	-0.0843309	0.0391995	-0.00025416	-0.018644	0.0855637	-0.000158302	0.000283425	-2.37269e-05	0.092356	-2.40719e-05	0.000781005	-8.02428e-05
17	2.5	0.1	10	2.72915	8.23244e-05	0.000260434	0.0708329	8.52213e-05	0.0323724	0.00575679	0.00278404	0.00461439	0.233293	0.142613	-0.00018149	-0.0156866	0.0597377	0.000135599	0.000642136	0.00130818	0.0619404	0.000396266	0.00017685	0.000801258
17	2.5	0.1	10	2.88861	-0.000371602	-3.71175e-05	0.172082	-0.000448561	0.0123133	0.00795052	0.00859051	0.00236087	0.432569	0.530601	-0.000814944	-0.019442	0.0587126	-9.65422e-05	0.000114742	0.000261905	0.0135489	3.82776e-05	0.00019811	0.000234087
17	2.5	0.1	10	1.2638	-9.28682e-05	0.000141304	0.0474485	-0.00013949	0.026155	0.0033273	0.00218513	-0.00197727	0.260427	0.163814	-0.000544424	-0.0183418	0.0642633	-7.39899e-05	7.88817e-05	0.000653063	-0.0253142	0.000195822	0.00016946	0.000540343
17	2.5	0.1	10	1.65096	-0.000128821	8.13552e-05	0.0303833	-0.00025844	0.00213745	0.00172432	0.00122307	-0.00408157	0.187899	0.0937186	-0.00111005	-0.0207623	0.0530145	-0.000108866	0.000178253	-0.000957707	0.199354	-0.000251881	-2.88438e-05	-0.000580658
17	2.5	0.1	10	2.96383	3.71441e-05	0.000282016	0.0246586	0.000149869	0.0288779	0.00470576	0.00353599	0.000151335	0.292774	0.240466	0.000120581	-0.0134632	0.0567326	0.000286208	0.000271235	0.0010683	-0.00522748	0.000332037	8.22624e-05	0.000752497
17	2.5	0.1	10	3.48189	0.00112434	0.000368917	-0.134751	0.00094283	0.0100734	0.00478828	0.00741527	-0.00380546	0.498383	0.740567	-0.000663686	-0.0177656	0.0514461	-7.78814e-05	3.65434e-05	9.42387e-05	0.00486271	2.58624e-05	-8.73149e-05	-2.54988e-05
17	2.5	0.1	10	-3.79281	-0.000100986	5.58221e-05	0.0452289	0.00013054	0.00582954	0.0031868	0.00238537	-0.003762	0.328176	0.21239	-0.000630416	-0.0176539	0.0523757	6.6691e-05	-2.64524e-05	-0.000845481	0.090933	-0.000175672	-1.13284e-05	-0.000221612
17	2.5	0.1	10	2.34862	2.30034e-05	3.72147e-05	0.0577225	-0.000395832	0.0222045	-0.00102637	0.000720549	-0.000579871	-0.129079	0.0328096	0.00108828	-0.00775214	0.0584145	-2.29949e-05	0.00048025	0.000353558	0.108012	0.000115966	0.000128342	0.000266505
17	2.5	0.1	10	-3.81582	-0.000465127	0.000245438	0.0701934	0.000281551	0.00388082	0.000561134	0.00114299	-0.000950597	0.000590899	0.0674205	0.00179362	-0.00490781	0.066517	0.000431906	5.73301e-05	1.51305e-06	0.019485	-6.25273e-05	-0.000119553	-0.000148887
17	2.5	0.1	10	2.08489	-0.000231922	-0.00011233	0.103756	-1.94766e-05	0.0167504	0.00258318	0.00134742	-0.00416028	0.284581	0.10793	-0.00056781	-0.0155238	0.0381611	0.000149385	0.000457116	-0.000494863	0.220087	7.84586e-05	0.000112037	0.000121943
17	2.5	0.1	10	-2.64682	-1.54301e-05	0.000372116	0.0053165	-3.7103e-05	0.00694192	0.00370801	0.00352424	-0.0025875	0.320919	0.296728	-0.000398635	-0.0158929	0.0499808	-5.7966e-05	0.000134385	-0.000321391	0.079285	-2.09343e-05	5.11656e-05	-0.000270975
17	2.5	0.1	10	2.64231	0.000394793	0.000280799	-0.0853475	0.000219778	0.0147514	0.000969708	0.00107087	0.000395168	0.0124364	0.0570556	0.000240338	-0.013096	0.0595347	-5.47779e-05	3.19906e-05	0.000588903	-0.0333031	0.000338752	-6.32906e-05	0.000133387
17	2.5	0.1	10	0.219276	-0.000209768	-1.86855e-05	-0.044332	-0.000534445	0.00122811	0.00163934	0.00147956	-0.00485292	0.211498	0.131055	-0.00141932	-0.0211857	0.0350341	-0.000131603	0.000112639	-0.00121534	0.228157	9.61077e-05	3.16187e-05	-0.000446594
17	2.5	0.1	10	1.86041	-0.00041641	-1.56888e-06	0.156955	-0.000236883	0.023405	0.00413836	0.00306492	-0.000200383	0.262313	0.210655	-0.000718128	-0.0182587	0.0528236	0.000163176	0.000549878	0.000260285	0.138344	-3.74237e-05	8.64479e-05	0.000260236
17	2.5	0.1	10	1.20748	-2.92289e-05	1.01062e-05	0.0857868	-0.000287335	0.0209412	-0.000953048	0.000697811	-0.00200227	-0.115969	0.0330143	0.000815587	-0.0102449	0.0639055	-0.000119826	0.000288942	0.000270782	0.0625587	1.85587e-05	0.000482764	0.000102916
17	2.5	0.1	10	4.11617	0.00111188	0.000495332	-0.0552232	0.000629053	0.0292636	0.0058763	0.00597201	0.00465712	0.238946	0.319401	0.00185978	-0.00454563	0.0666538	0.000544927	0.000691491	0.00164203	0.0485987	0.000606909	0.000139286	0.000590912
17	2.5	0.1	10	0.225961	-5.2749e-05	1.46004e-05	0.0787148	0.000473224	0.0455614	0.00136122	0.00128849	0.00144209	0.0251424	0.0688088	0.00136284	-0.00781766	0.0690376	0.000490128	0.000514322	0.00209594	-0.0127192	0.000122669	0.000514578	0.000533805
17	2.5	0.1	10	-0.100834	-2.15716e-05	0.000350468	-0.043477	0.000327643	0.00561203	0.002199	0.0014167	-0.00281787	0.188579	0.102685	-0.000463036	-0.0175439	0.0611396	-5.40475e-05	-0.000296527	-0.000448347	-0.0591841	-0.000166272	-3.0827e-05	-0.000383789
17	2.5	0.1	10	2.6856	-3.71129e-06	2.74439e-05	0.0595943	7.72736e-05	0.0238968	0.00432987	0.0032205	-0.00168799	0.335453	0.248947	0.000166042	-0.00998563	0.0358198	0.000399696	0.000561393	0.000347375	0.131364	0.000318653	0.000249799	0.000591353
17	2.5	0.1	10	-2.44666	-0.000224521	-3.98308e-05	-0.0814293	-0.000336046	-0.000357993	0.00230523	0.00143379	-0.00285047	0.199853	0.104586	-0.00133573	-0.021877	0.0491238	-0.000306058	-0.000131122	-0.00114282	0.0937126	-0.000272902	0.000253236	-0.000648055
17	2.5	0.1	10	-1.46872	-0.000115722	8.71209e-05	0.0356561	0.000333303	0.0278282	0.00373134	0.00210025	-0.00109216	0.261437	0.146151	0.000341221	-0.0100222	0.0431357	2.39598e-05	0.000437552	0.000431183	0.0881122	0.000219346	0.000403176	0.000472269
17	2.5	0.1	10	2.26215	1.77875e-05	4.16023e-06	0.0825072	0.000254521	0.0318462	0.00431171	0.00252759	0.000396989	0.25561	0.163056	0.000333287	-0.0138308	0.0697885	0.000360827	0.000506407	0.000975837	0.0567371	-4.4795e-05	0.000328122	0.000509981
17	2.5	0.1	10	1.63842	-0.000394704	-5.48493e-05	0.141979	-0.000298649	0.0179522	0.00530986	0.00199493	0.00152099	0.289662	0.116045	-0.00144302	-0.0245823	0.0797621	-3.92508e-05	0.000570525	0.000279937	0.14188	-9.00454e-05	2.04879e-05	0.00027451
17	2.5	0.1	10	-2.68387	-0.000455293	5.59312e-06	0.0018035	-0.000377099	0.0114735	0.00533137	0.00661023	0.00167364	0.286299	0.422329	0.000249348	-0.0123173	0.0542132	0.000126129	0.000419373	0.000548582	0.0718468	0.000412912	0.000291089	9.69974e-07
17	2.5	0.1	10	3.02569	0.000549217	0.000223612	0.0489642	0.000618252	0.0331862	0.0016625	0.00120091	0.000590499	0.0594246	0.0658008	0.0013687	0.00349643	0.0176636	0.000582328	0.000456402	0.000934654	0.0480669	0.000336149	0.000105128	0.000652604
17	2.5	0.1	10	3.33385	0.000765532	0.000345128	0.000917823	0.000506019	0.0221539	0.000304435	0.000981823	0.00303689	-0.0595403	0.044869	0.00090328	-0.0106314	0.0702655	9.96132e-05	0.000587382	0.000804173	0.0911613	0.000301652	0.000332385	0.000206963
17	2.5	0.1	10	2.74087	0.000302001	0.000193671	-0.05676	0.000333383	0.0251852	0.00533906	0.0074738	-0.000641556	0.372266	0.564511	-0.000249545	-0.0163503	0.0619832	0.000199552	0.00055031	0.000913858	0.0723763	9.30937e-06	0.000270566	0.000499947
17	2.5	0.1	10	3.54166	0.000601468	0.000470185	0.0155267	0.000512422	0.0284131	0.00434735	0.00323563	0.00478796	0.151589	0.166298	0.00163368	-0.00948784	0.0913212	0.000574571	0.000856321	0.00207725	0.0526597	0.000341691	0.00032282	0.000535896
17	2.5	0.1	10	-1.84928	-4.84235e-05	0.000317325	-0.0423532	0.000125189	0.00881857	0.00288207	0.00256949	-0.00406892	0.312208	0.238764	-0.00095689	-0.019067	0.0456853	-0.00013724	-1.85278e-05	-0.000881548	0.100012	-8.71118e-05	0.00020318	-0.000381538
17	2.5	0.1	10	3.66753	0.000272813	0.000359652	-0.0797772	-2.72506e-05	0.0198673	0.00520501	0.0086178	0.000705796	0.309568	0.593255	-0.000279263	-0.0165316	0.0620116	-2.85381e-05	0.000217852	0.00101029	-0.0140486	0.00034144	3.53031e-05	0.000678953
17	2.5	0.1	10	3.81329	0.000518893	0.00020957	-0.148414	0.000164116	0.0171754	0.00401683	0.00402572	-0.00121651	0.289524	0.306252	-0.000433058	-0.0167556	0.0555118	-0.000265272	-0.000153367	0.00024986	-0.0624712	0.000276252	2.09835e-05	0.00014088
17	2.5	0.1	10	-0.387531	-0.00062146	-8.43219e-05	0.147137	-0.000610688	0.000906697	-0.00083435	0.000634255	-0.00623077	-0.0599948	0.034674	-0.00123372	-0.0198968	0.0353985	-0.00023436	-0.000270344	-0.00153356	0.097863	-0.000336178	7.46115e-05	-0.000457408
17	2.5	0.1	10	2.02175	-0.000364238	-5.66713e-05	0.117713	6.62025e-05	0.0167678	0.00255141	0.00138102	-0.00380968	0.264092	0.108045	-0.000412705	-0.0150345	0.0424985	0.000138424	0.00031195	-0.000136512	0.115172	0.000106071	9.80416e-05	0.000187851
17	2.5	0.1	10	-0.744605	0.000270376	4.14443e-05	-0.115265	2.92845e-05	0.0186743	0.0012684	0.00111934	-8.7371e-05	0.0420463	0.0622358	-0.000282679	-0.0181566	0.0782177	-0.000175453	0.000483834	0.00075734	0.0695606	9.27501e-05	0.000220838	0.000245521
17	2.5	0.1	10	2.11082	-0.000371892	4.39658e-06	0.177831	-0.000252884	0.016924	0.00713856	0.00431228	0.00256133	0.373776	0.255138	-0.000558376	-0.020411	0.0878159	5.66092e-05	0.000130925	0.000676868	-0.0135497	-6.24411e-05	0.000130344	0.000310273
17	2.5	0.1	10	-0.336966	0.000142999	5.68299e-05	0.154147	-0.000275324	0.0169785	0.0014418	0.00106547	0.000833254	0.039724	0.0553813	0.000265107	-0.0143322	0.07074	0.000143129	0.00059683	7.04896e-05	0.176657	-3.21186e-06	0.000391781	-0.000186695
17	2.5	0.1	10	3.11836	-2.53921e-05	0.000205435	0.137266	6.30202e-05	0.0298639	0.00642857	0.00581216	0.00144931	0.367565	0.374558	0.000697074	-0.00802796	0.0454203	0.000353926	0.000271204	0.000802546	0.0129115	0.000337811	0.000295514	0.00073535
17	2.5	0.1	10	-0.506535	-0.000212201	2.2418e-05	-0.025468	-0.000474717	0.00405847	0.00223554	0.00209465	-0.0049172	0.285244	0.204924	-0.00188023	-0.0246224	0.0369846	-0.000227386	1.28692e-06	-0.000774049	0.0914213	0.000159896	6.43994e-05	-0.000354735
17	2.5	0.1	10	-0.759114	0.00018659	0.000283708	0.0185049	-0.000239858	0.00823122	0.00116168	0.00132126	-0.00568679	0.191979	0.123001	-0.00136511	-0.0215978	0.0435889	-0.000491075	-5.20134e-05	-0.000748306	0.0660883	7.00272e-05	0.000171075	-0.000240886
17	2.5	0.1	10	2.64251	0.000442751	0.000185886	-0.105842	5.55357e-05	0.0302134	0.00205758	0.0011552	-0.000586503	0.11267	0.0668866	-0.00030043	-0.0146212	0.0450622	-0.00010552	7.11966e-06	-1.85054e-05	0.00572244	0.000228626	0.000157011	0.000156249
17	2.5	0.1	10	-0.189076	0.000359098	0.000400218	0.0060862	0.000105791	0.0111455	0.0037158	0.00271651	-0.00186267	0.289845	0.20861	-0.000583844	-0.0170111	0.0492924	-0.000137011	3.5998e-05	-0.000358947	0.0497278	9.90628e-05	0.000356792	7.37529e-06
17	2.5	0.1	10	2.36116	0.000544364	0.000258054	-0.0488266	0.000227811	0.0188301	0.00183251	0.00118792	-0.000413667	0.091325	0.0687266	-0.000700861	-0.0180891	0.0522524	-8.3231e-05	0.00017562	0.000447105	0.0152893	9.59962e-05	-9.88935e-05	-0.000182958
17	2.5	0.1	10	0.96813	-3.20619e-05	1.30731e-05	0.0997885	0.00013786	0.0269551	0.00211236	0.00106149	-0.00215604	0.158912	0.0657632	-0.000356757	-0.0138437	0.0367639	0.000185427	0.000407465	-3.0363e-05	0.131892	0.000126442	0.000434345	0.000193299
17	2.5	0.1	10	-2.55949	-0.000128115	0.000311915	0.0781629	0.000198183	0.0189758	0.0029942	0.00189205	0.00170449	0.130038	0.10798	0.000506134	-0.0113571	0.0586791	0.000157002	0.00024684	0.000461304	0.0334434	0.000208979	7.36017e-05	0.000260652
17	2.5	0.1	10	5.38752	0.000121184	0.000110093	0.0549374	0.000272435	0.0271541	0.00610295	0.00643791	-0.000522864	0.426711	0.478635	-0.000325021	-0.0134856	0.0358691	0.000219239	0.000345656	0.000538063	0.0532688	0.000265353	0.000288144	0.000518435
17	2.5	0.1	10	0.527097	5.41453e-05	-4.6767e-07	-0.0828595	-0.000168992	0.0183543	0.00135159	0.00185341	0.00166322	0.0214477	0.10566	0.000361013	-0.0109557	0.0497932	3.62627e-05	0.000375249	0.000210448	0.0936595	0.000440385	0.000539396	6.79792e-05
17	2.5	0.1	10	3.07002	0.000170334	0.000170705	-0.0234868	-0.000421092	0.00800379	0.00263119	0.00353461	-0.0045452	0.31045	0.360543	-0.00119035	-0.0216726	0.057888	-0.00026398	0.000111807	-0.000283569	0.0670039	0.00023069	0.000154796	0.000115109
17	2.5	0.1	10	-0.291571	0.000316966	0.000203549	0.0613073	-0.000400163	0.0232435	0.0070217	0.00457559	0.00722125	0.242149	0.213573	-0.000553245	-0.0196312	0.0781701	-0.000118457	0.000657702	0.00113237	0.0793128	0.000422921	0.000434344	0.000472361
17	2.5	0.1	10	2.63953	0.000344881	0.000107176	-0.00412132	4.55935e-05	0.015791	0.00196407	0.00208	0.000876159	0.0757797	0.1266	-0.000180122	-0.0159773	0.0623694	0.000111795	0.000479555	-8.53663e-05	0.162028	-3.04203e-06	0.000174627	-0.000130896
17	2.5	0.1	10	-2.88509	-0.000645982	5.84301e-05	0.0728234	-0.00010333	0.0211264	0.00114047	0.00107103	-0.00179339	0.0640706	0.0650017	-1.33796e-05	-0.0150032	0.0625688	4.44291e-05	0.000132393	0.000299364	0.0154281	4.09145e-05	0.00014475	0.000272657
17	2.5	0.1	10	3.87714	0.00063701	0.000350096	-0.0890073	0.000406172	0.0187539	0.00691541	0.0114485	0.00123699	0.408955	0.766322	-4.80261e-05	-0.0145011	0.0566843	5.95799e-05	0.000480057	0.000706197	0.0731504	0.000386703	0.000347148	0.000257509
17	2.5	0.1	10	0.174996	-0.000270134	-5.54712e-05	0.123684	-0.000176331	0.00966235	0.00190748	0.00144669	-0.00475216	0.238089	0.125871	-0.00155202	-0.0233362	0.0498543	3.8536e-05	0.000166265	-0.000789898	0.161439	-0.000303788	1.21293e-05	-0.000117112
17	2.5	0.1	10	-0.912855	0.000361578	0.000125572	-0.185978	0.000115751	0.0216713	0.00179264	0.00200584	-0.00109681	0.103319	0.138492	0.000523	-0.0169964	0.111791	-0.00025512	0.000181362	0.00102354	-0.0234568	0.00115233	0.000237782	0.0009073
17	2.5	0.1	10	0.447002	-0.000288213	-7.79002e-05	-0.00697975	0.000126352	0.0160537	0.00285294	0.00187915	-0.00477393	0.349467	0.176609	-0.00160565	-0.0221211	0.0306081	6.67324e-05	0.000680548	-0.000369377	0.276223	6.23264e-05	0.000215703	0.000165106
17	2.5	0.1	10	3.2063	0.000271775	0.000290234	0.0715626	-0.000449194	0.0121567	0.00497693	0.00436272	-0.000759775	0.348698	0.322466	-0.00128001	-0.0226215	0.0632579	-0.000351003	0.000181336	0.00037129	0.023105	0.000194731	-0.000134629	0.000398071
17	2.5	0.1	10	3.05178	0.000923472	0.000521567	-0.065417	0.000960435	0.0139572	0.00588711	0.00668258	-0.0011519	0.440416	0.522611	0.000349981	-0.0130544	0.0642908	0.000226473	0.000141571	0.000532924	-0.000506052	5.49064e-05	0.000228138	-5.16543e-05
17	2.5	0.1	10	3.29562	0.000661769	0.000334839	0.0047358	0.000565494	0.0343709	0.00395729	0.00246821	-0.0015052	0.295995	0.181798	0.000855979	-0.00679142	0.044458	0.000541894	0.000461005	0.0013288	0.0206619	0.00035682	-1.90856e-05	0.000949097
17	2.5	0.1	10	1.66329	0.000201334	0.000177511	0.00214615	5.3888e-05	0.0353998	0.000816776	0.00105804	-0.00122298	0.0257848	0.0615856	0.00100363	-0.00780659	0.0555942	0.000331275	0.000441138	0.00079499	0.0556786	0.000367639	0.000175465	0.000602304
17	2.5	0.1	10	2.64441	0.000603576	0.000393835	0.0126727	0.00050025	0.0283955	0.00338014	0.00217755	0.00476642	0.0985817	0.108056	0.00147406	-0.00969983	0.0865937	0.000409281	0.00121061	0.00200133	0.125215	0.000304362	0.00028059	0.000436178
17	2.5	0.1	10	-2.73575	-0.000126964	0.000541077	-0.0677474	0.00030198	0.00937742	0.00295861	0.00240942	-0.00312994	0.274266	0.202542	-0.000635662	-0.0185827	0.061124	-5.66536e-05	7.14116e-05	0.000127509	0.0124183	7.98176e-05	-0.000154773	8.20707e-05
17	2.5	0.1	10	3.09241	0.000271616	0.000138021	0.0384542	0.000112356	0.0317923	0.00434872	0.00187776	0.00031697	0.260883	0.116357	9.61251e-05	-0.0125998	0.0493063	7.863e-05	5.05809e-05	0.000250643	-0.00393114	0.000260254	0.000217402	0.00054096
17	2.5	0.1	10	-3.60216	-0.000796085	-1.69106e-05	0.0448545	-0.000266632	0.00842395	0.00308394	0.00174495	-0.00505445	0.395316	0.165884	-0.00171273	-0.0252248	0.0637602	-0.000282358	-0.000290011	-0.000997993	-0.00174703	-0.000311487	-0.00014314	-0.000115441
17	2.5	0.1	10	3.61063	0.000417174	0.000158062	0.0624359	6.59192e-05	0.0322355	0.00571949	0.00580926	0.000406416	0.357685	0.401601	0.000557074	-0.0110123	0.0584503	0.000347571	0.000515	0.000703036	0.0823185	0.000313681	0.000136465	0.000648448
17	2.5	0.1	10	3.25572	0.000341049	0.000163183	0.0343811	0.000105008	0.0396389	0.00265671	0.00160391	0.000264609	0.13826	0.0966247	0.00109093	-0.00824539	0.0615612	0.000495981	0.000910625	0.00114439	0.136138	0.000178763	0.000221639	0.00060331
17	2.5	0.1	10	3.25457	-0.000124341	4.20797e-06	0.0158439	-0.000737718	0.0130904	0.00256196	0.00310472	-0.00266398	0.217221	0.259466	-0.000452465	-0.0189658	0.0768365	-0.000331292	-0.000183115	0.00128938	-0.119223	0.000739424	8.03549e-05	6.01767e-05
17	2.5	0.1	10	0.0862653	-0.000239722	1.77502e-05	0.0976423	-9.75908e-05	0.0111636	0.00224145	0.00126788	-0.00333962	0.212151	0.0923739	-0.00133687	-0.0216559	0.0464208	-2.14215e-06	0.000260288	-0.000863702	0.214952	-0.000308629	0.000304971	-5.08882e-05
17	2.5	0.1	10	2.03764	-0.000241021	0.000202814	0.0395438	-0.00019924	0.0255992	0.00311003	0.00256414	-0.00222884	0.250895	0.201274	-0.00116965	-0.0223773	0.0688979	0.000157919	0.000458123	0.00038032	0.0990037	8.02072e-05	-2.25228e-06	0.000483936
17	2.5	0.1	10	-1.59822	-0.000199557	5.7651e-05	-0.21654	-0.000277465	0.023894	0.00300302	0.00257399	-0.00269143	0.259651	0.210278	-0.000914937	-0.0194355	0.0520795	-0.000333264	-7.95991e-05	-4.46618e-05	-0.019148	0.000108171	-1.8254e-05	8.38383e-05
17	2.5	0.1	10	2.72955	-2.2706e-05	-6.71502e-06	0.0663255	0.000391386	0.0206763	0.000779175	0.000938385	-0.00254691	0.0477874	0.056193	-0.000770421	-0.0170567	0.0390985	0.000155262	0.000503271	0.000109727	0.143275	0.000193903	-6.13942e-06	0.000333028
17	2.5	0.1	10	2.69916	-6.23104e-05	8.31387e-05	-0.0458263	-5.99631e-05	0.0367203	0.00111462	0.00102272	-0.000154873	0.0315343	0.0551514	3.52764e-05	-0.0148087	0.0633796	-5.88169e-05	0.000139403	0.000379945	0.0107623	0.000175108	0.000800595	0.000380452
17	2.5	0.1	10	-0.903178	-0.00027396	-0.000140974	0.0200475	-3.73589e-06	0.0217881	0.000981965	0.000970967	-0.00509123	0.143215	0.07278	-0.00101373	-0.0164148	0.0207113	-4.78155e-05	0.000517683	-0.000493733	0.242013	0.00010487	0.000374581	8.41707e-05
17	2.5	0.1	10	2.55992	-0.000257857	-0.000130441	0.0380338	-0.000477124	0.00544626	-5.0257e-05	0.000903097	-0.00390603	-0.00698983	0.0583582	-5.52287e-05	-0.015805	0.0674633	-0.000176506	6.50073e-05	-0.000703079	0.106187	-9.03971e-05	0.000659328	-0.000322969
17	2.5	0.1	10	-2.60779	0.000416295	0.000176529	-0.115133	0.00051201	0.010422	0.00175179	0.00147504	-0.00451999	0.209393	0.126172	-0.00145891	-0.0227054	0.0494837	-0.000192773	0.000126454	-0.000976268	0.180326	-0.000238598	0.000186204	-0.000405903
17	2.5	0.1	10	2.7903	0.000105883	8.46067e-05	-0.00633612	-0.00011431	0.0216849	0.00204055	0.0014857	-0.00318734	0.186462	0.112661	-0.000778748	-0.019779	0.0648434	-1.73327e-05	0.000383869	0.00023748	0.0932277	9.2895e-06	0.000177804	0.00042931
17	2.5	0.1	10	-0.0596633	0.000242988	0.00052003	-0.0773179	0.000325489	0.0222947	0.00525896	0.00662849	0.00125239	0.294855	0.43533	-6.34901e-05	-0.0158606	0.0675332	7.08759e-05	0.000488123	0.00131553	0.0275071	0.000485822	0.000307798	0.000495295
17	2.5	0.1	10	1.9256	-2.1412e-05	0.000159	0.138125	-0.00018691	0.0142418	0.00415564	0.00394253	-1.33499e-05	0.257375	0.273743	-0.000218015	-0.0175418	0.0754251	0.000160939	0.000527364	-0.000245573	0.201804	-2.43471e-05	9.68495e-05	-0.000230923
17	2.5	0.1	10	0.731034	0.000257971	0.000275507	-0.00110278	6.36765e-05	0.0293445	0.00382868	0.00315317	-0.000796869	0.258758	0.22698	0.000683985	-0.0100795	0.0574193	0.00020003	0.000255416	0.000431938	0.0383034	0.000254676	0.000467713	0.00152508
17	2.5	0.1	10	0.339914	0.000545376	0.000238213	-0.0461753	8.56477e-05	0.0249145	0.00331679	0.0033731	-0.00193692	0.257941	0.267424	-0.000198484	-0.0154007	0.0564146	-0.000191519	-0.000246122	0.000434389	-0.0987649	0.000184655	0.000170504	0.000257887
17	2.5	0.1	10	1.95241	-0.000113572	4.9885e-05	0.156974	-0.000421848	0.00914145	0.00777796	0.00827142	0.0047904	0.340712	0.443958	-0.00097162	-0.0218388	0.0770417	1.18258e-05	0.000706258	-0.000245525	0.261731	-8.53681e-05	-5.80307e-05	-0.000328013
17	2.5	0.1	10	-2.09942	0.000453348	0.000391376	-0.145131	4.88286e-05	0.0177031	0.00381235	0.00548992	-0.00350571	0.378464	0.522785	-0.000530073	-0.0170306	0.0525114	-0.000186705	-9.76262e-05	-0.000313483	-0.00123196	0.00016036	0.000130229	3.07622e-05
17	2.5	0.1	10	2.1868	-0.000199818	8.32495e-05	0.0713824	-0.000574697	0.00514069	0.00429985	0.00440058	-0.00130867	0.316649	0.339625	-0.00124981	-0.0203548	0.0387602	-4.3903e-05	0.000335316	-0.000616544	0.196798	0.00021148	1.27854e-05	-0.000257457
17	2.5	0.1	10	-0.675908	-8.03949e-05	-8.05958e-06	0.0088761	0.000336357	0.0173364	0.00237309	0.00126879	-0.00301204	0.212393	0.0900149	-0.000462855	-0.014407	0.0354628	0.000149052	0.000439246	-4.93847e-05	0.14435	0.000158526	0.000358739	0.000148219
17	2.5	0.1	10	-0.910235	-0.000228166	8.51622e-05	-0.135573	-0.000773413	0.020456	0.00230529	0.00139485	-0.00141112	0.153794	0.090541	-0.000611503	-0.0183983	0.0607283	-0.000470518	-0.000395233	-0.000279813	-0.105285	0.000175065	1.69294e-05	-7.35019e-05
17	2.5	0.1	10	-2.79733	-0.000477128	0.00016112	0.0695259	-0.000510067	0.0111102	0.00105748	0.00112061	-0.00559415	0.174064	0.0958235	-0.00164493	-0.0230681	0.0382737	-0.000346809	-5.01027e-05	-0.000209916	0.00492264	0.000200518	-9.98302e-05	0.000168306
17	2.5	0.1	10	2.46615	0.000561166	0.000505099	0.152785	0.000353877	0.0412131	0.00572967	0.00710383	0.000525477	0.353786	0.491618	0.000628181	-0.00738892	0.0393766	0.000465504	0.000452996	0.00166215	-0.00150186	0.000373525	0.000194775	0.000942535
17	2.5	0.1	10	-0.226844	-8.64374e-06	-3.15959e-06	-0.0923251	-0.000342723	0.00796981	-0.000202839	0.000803627	-0.00127498	-0.057796	0.0407074	-0.000450465	-0.0185728	0.0725268	-0.000210409	-8.1456e-05	-0.000251538	-0.00161313	-5.182e-05	0.000135753	-0.000287467
17	2.5	0.1	10	-1.11213	-0.0005052	-6.01991e-05	-0.117114	-0.000451178	0.00781357	0.000124662	0.000765905	-0.00704512	0.108017	0.0580903	-0.00129923	-0.0224875	0.0598317	-0.000416325	-0.000294782	-0.000921541	-0.0130471	-0.000216392	0.000107468	-0.000274467
17	2.5	0.1	10	-1.62422	-0.000237604	-0.000105399	-0.0788822	-0.000132141	0.0101203	0.00186194	0.00279596	-0.00663781	0.349425	0.358162	-0.00170317	-0.0253067	0.0662548	-0.000351669	-5.46478e-05	-0.000363799	0.0186649	-0.000280091	0.000103693	-0.000216335
17	2.5	0.1	10	3.33474	0.000263766	0.000215137	-0.082095	0.000305105	0.0272047	0.00430572	0.00294599	-0.00118561	0.312085	0.216713	-7.37047e-05	-0.0128908	0.0435672	0.000580898	0.00095979	0.000849373	0.178325	0.000304594	0.0001373	0.000392138
17	2.5	0.1	10	-2.49224	-0.000382067	1.95579e-05	-0.0619007	-0.000157555	0.0095683	0.00348489	0.00318055	-0.0040927	0.378633	0.305384	-0.00125089	-0.0189398	0.025779	-2.31684e-05	0.000122545	-0.000573281	0.108947	0.000148452	-4.0769e-05	0.000100181
17	2.5	0.1	10	0.389149	-0.000141947	3.97487e-05	0.05312	-0.000504844	0.00578567	0.00257958	0.00186406	0.00147778	0.106839	0.10751	-0.00126704	-0.0234961	0.0775717	-0.000127351	0.000470398	-0.000429874	0.213211	-3.65864e-05	0.000224035	-0.000246692
17	2.5	0.1	10	-0.530526	-9.573e-05	0.000245712	0.0849906	1.59914e-05	0.0189355	0.00327969	0.00188707	-0.000201148	0.197009	0.121054	0.000101966	-0.0153044	0.0711275	0.00017784	0.000239658	-3.37917e-05	0.0798383	3.61155e-05	0.000177608	-0.000315593
17	2.5	0.1	10	-1.80033	-0.000212341	2.3521e-05	-0.170375	1.46672e-05	0.00933424	9.07449e-05	0.000792017	-0.00634736	0.0742435	0.0575442	-0.00158676	-0.0220797	0.0316636	-0.000355987	-0.000278078	-0.000577324	-0.0414657	5.80155e-05	-5.77979e-05	-0.00013707
17	2.5	0.1	10	-3.05316	-0.000474529	0.000207187	-0.193167	0.000106084	0.0136634	0.00133523	0.00116422	-0.00536752	0.198765	0.0990005	-0.00184946	-0.0239046	0.0303906	-0.000430827	-0.000384999	-0.000425409	-0.0925363	6.55202e-05	-0.000191759	-2.41811e-05
17	2.5	0.1	10	3.27424	2.19307e-05	0.000261738	0.0032168	-0.000481492	0.0195005	0.000769249	0.00107175	0.00132724	-0.0135825	0.0544561	-0.000552973	-0.018427	0.0646237	-5.78199e-05	0.000495071	0.000821349	0.066802	0.000308537	-0.00031284	0.000378697
17	2.5	0.1	10	1.06634	0.000601127	0.000475325	0.0770727	0.000381574	0.027157	0.00254472	0.00209635	-0.00245779	0.208075	0.16222	0.000119407	-0.0143725	0.0639107	-4.75931e-05	0.000314995	0.000627192	0.0376062	0.000260372	0.000215094	5.50814e-05
17	2.5	0.1	10	0.64233	-0.000580433	-5.89758e-05	0.0620313	-0.000582793	0.00747381	0.000298145	0.000809895	-0.00560487	0.0764518	0.0557912	-0.0014691	-0.0234526	0.0588512	-0.000262661	-0.00018021	-0.00082878	0.0243252	-0.000310317	-2.09143e-05	-0.000194372
17	2.5	0.1	10	-2.62569	0.00290639	0.000663825	0.174207	-0.000619447	0.010761	0.00151403	0.00116827	-0.00100962	0.0787152	0.0697196	-0.000189262	-0.0161351	0.0632988	-0.000232254	-0.000110745	-0.000345227	-0.00270522	0.000301637	6.88421e-05	-4.35161e-05
17	2.5	0.1	10	-2.97396	-0.000713229	-9.15756e-05	-0.0165386	-0.000303195	0.011329	0.00274435	0.0015105	-0.00452381	0.322085	0.13024	-0.000597776	-0.015782	0.0385289	-5.80061e-05	-0.000159419	-0.000845084	0.035126	3.27302e-05	-9.73222e-05	-4.08734e-05
17	2.5	0.1	10	5.42097	0.000761164	0.000385985	-0.0513156	0.000157597	0.0252537	0.00779057	0.00779274	0.00478849	0.341463	0.417605	-0.000412891	-0.0170536	0.0593683	-0.00011397	0.000407069	0.000533781	0.069964	0.000481363	0.000170051	0.000355396
17	2.5	0.1	10	0.0919724	4.74687e-05	6.69427e-05	0.00297773	0.000289586	0.015165	0.00245233	0.00155477	-0.00154298	0.170005	0.104933	-0.000812595	-0.0200633	0.065827	9.69039e-05	0.000240493	-0.000439364	0.132515	-0.000234489	0.000378069	7.87908e-05
17	2.5	0.1	10	0.173242	0.000457944	0.000263821	-0.143401	0.000726159	0.026365	0.00334349	0.00202128	0.00140987	0.159943	0.118591	-6.31522e-05	-0.0169631	0.078281	-0.000142627	-0.000191215	0.00065504	-0.0949601	9.17634e-05	-3.62725e-05	0.000436172
17	2.5	0.1	10	3.84994	0.000858272	0.000187263	-0.0519823	0.000310817	0.0342962	0.00588182	0.00849286	0.00253872	0.295445	0.518682	0.00159697	-0.00789127	0.0782582	0.000291595	0.000383134	0.000541781	0.0628752	0.000105452	1.41002e-05	0.000660893
17	2.5	0.1	10	-0.706815	-3.32254e-05	-4.65016e-05	-0.0385967	-0.000276245	0.014258	-0.000196067	0.000719789	-0.00444211	-0.0128255	0.0403674	-0.000828997	-0.0197439	0.0610773	-0.00015664	8.22146e-05	-0.00061277	0.0994162	-0.00015542	0.000260049	-3.68879e-05
17	2.5	0.1	10	-3.40118	-0.000806197	-8.56105e-05	-0.0243934	-0.000401919	0.00468291	0.000404361	0.000736042	-0.00426195	0.049923	0.0416574	-0.00108603	-0.021871	0.0685611	-0.000277726	-0.00021404	-0.00056561	-0.0184854	-0.000282561	-0.000201264	-0.000232885
17	2.5	0.1	10	4.19126	0.000394002	0.000128387	0.124392	-0.000182513	0.0319988	0.00222521	0.00163615	0.0038575	0.0462728	0.0814904	0.000956098	-0.0111879	0.0766634	0.000189181	0.000333726	0.00150753	-0.0175673	0.000221898	8.44892e-05	0.000627336
17	2.5	0.1	10	-2.43322	0.000518038	0.000465917	0.143804	0.000307999	0.0172217	0.00448343	0.00375121	0.00192972	0.222933	0.228328	0.000466302	-0.0123938	0.0644985	-5.0682e-06	0.000111049	0.000603583	-0.0136292	0.000164145	-4.54057e-05	0.000177779
17	2.5	0.1	10	4.02132	0.00100191	0.000577047	0.00670597	0.000312371	0.0182937	0.00189664	0.00149382	-0.0023219	0.144472	0.105745	0.000626458	-0.0117484	0.0667193	0.000148694	0.000249628	0.00142981	-0.0312264	0.000295883	-0.000213829	0.000590124
17	2.5	0.1	10	3.03227	0.000101875	3.73749e-05	0.101688	-0.00026032	0.0166259	0.00647885	0.00611262	0.00585173	0.244135	0.307795	0.000512248	-0.01145	0.0595967	0.000127103	0.000352799	0.000250489	0.0829044	0.000407845	0.000173637	0.000197215
17	2.5	0.1	10	-1.55955	0.000578206	0.000334098	-0.134966	0.000142226	0.0328997	0.00243657	0.0022893	-0.00248926	0.199244	0.18042	-0.000137066	-0.0147381	0.0541371	-6.2571e-05	0.000177871	0.00045418	0.0153321	0.000304603	0.000245558	0.000479584
17	2.5	0.1	10	3.77078	0.000685366	0.000541907	-0.0115798	0.000499137	0.0286012	0.00171014	0.00135922	-0.000506537	0.0837717	0.0824566	0.000945394	-0.00952348	0.0642281	0.000236016	0.000602454	0.0014907	0.0402918	0.000312594	0.000341948	0.000755374
17	2.5	0.1	10	-3.38914	-0.000866983	-0.000156344	0.0984425	-0.000552386	0.000238385	0.000343254	0.000801603	-0.00505766	0.0648245	0.0521097	-0.00118111	-0.023346	0.082743	-0.000336105	-0.000382216	-0.000740494	-0.0676186	-0.000315957	-0.000150428	-0.000313107
17	2.5	0.1	10	3.24497	0.00121639	0.000663148	-0.0226579	0.00117455	0.0268338	0.00634874	0.00608088	0.00334031	0.300488	0.349934	0.00135232	-0.00857834	0.073702	0.000487523	0.000883625	0.00140475	0.106903	0.00015919	0.000101803	0.000248651
17	2.5	0.1	10	4.12755	0.00100339	0.000440451	-0.0821511	0.000568448	0.0168741	0.00142829	0.00128564	-0.0016495	0.0856522	0.0827383	-0.000140571	-0.0146192	0.0530199	-1.9491e-05	0.000444691	0.0011534	0.0289946	0.000280652	0.000381276	0.000578384
17	2.5	0.1	10	-1.96544	-0.000177669	0.000119225	-0.0693069	9.84354e-05	0.0126892	0.00265881	0.00293704	-0.00521159	0.354201	0.315365	-0.000732628	-0.0191533	0.0609751	-0.000291524	-0.00029389	-0.00010486	-0.0826747	0.000242221	0.000279913	0.000253122
17	2.5	0.1	10	1.64411	-0.000224486	-6.77661e-05	0.123143	-0.000542058	0.00616097	0.00205408	0.00157578	-0.00161933	0.138334	0.107309	-0.000814522	-0.0208362	0.0752203	-0.000119909	0.000353027	-0.000806788	0.24158	-0.000176241	-1.03329e-05	-0.000539391
17	2.5	0.1	10	1.17193	0.000554833	0.000201493	0.0726562	0.000333475	0.0282906	0.00537003	0.00707213	-0.000898981	0.38622	0.543599	0.00104536	-0.0102464	0.0733237	0.000331595	0.000237785	0.00252631	-0.0807847	0.000681119	-4.0468e-05	0.000996103
17	2.5	0.1	10	-1.17708	-5.06008e-06	0.000254095	0.0657446	4.79265e-05	0.0145106	0.00388125	0.00306193	-0.000513004	0.253103	0.215185	-0.000487058	-0.0176113	0.0603877	-0.000210675	0.000136283	0.000384709	0.00951508	2.97138e-05	0.000131744	-3.07363e-05
17	2.5	0.1	10	3.82896	0.00051887	0.000286027	0.0585041	8.08224e-05	0.0310394	0.00547874	0.00686839	0.00204254	0.284647	0.429346	0.00112539	-0.00961087	0.0720003	0.000143209	0.000403372	0.000905562	0.0375568	8.46274e-05	-3.29532e-06	0.000631404
17	2.5	0.1	10	2.43188	-0.000325933	-4.24501e-05	0.095224	-9.16371e-05	0.0257096	0.00143519	0.000937014	-0.00173943	0.0883213	0.0532221	-0.000161106	-0.0130162	0.0403902	0.000230356	0.000405709	0.000142211	0.110263	0.000138325	0.000364026	0.000220242
17	2.5	0.1	10	-0.268619	-0.000189172	-7.53008e-06	0.159551	-4.87776e-05	0.0183833	0.00434161	0.00350696	0.00131166	0.230336	0.22065	-0.00066473	-0.0145459	0.0263992	0.000111093	0.000226012	0.000253642	0.0461842	-0.000191126	0.000177902	0.000140457
17	2.5	0.1	10	-2.52744	-0.000375342	9.58445e-05	0.084336	-0.000438152	0.00837971	0.000650775	0.000958014	-0.00517675	0.106073	0.0717971	-7.3929e-05	-0.0147128	0.0570993	-0.000256425	-0.000216553	-0.000358791	-0.0382393	6.87811e-05	-0.000153278	-2.96209e-05
17	2.5	0.1	10	2.1631	-0.000395242	-8.99034e-05	0.0571296	-0.000625946	0.00713729	0.00298746	0.00232397	-0.00223616	0.240147	0.179777	-0.00106	-0.0185082	0.0341036	-7.22988e-05	0.000138232	-0.000858218	0.162352	0.000129238	1.07158e-05	-0.000340766
17	2.5	0.1	10	2.14441	0.00173516	0.000392892	-0.0108762	0.000699571	0.0242433	0.00408226	0.00295404	0.00128484	0.213364	0.183233	0.00111728	-0.00989937	0.0737317	0.000440609	0.000514527	0.000916471	0.0635246	1.02225e-05	0.000379364	-4.9102e-05
17	2.5	0.1	10	-2.46316	0.000106163	4.84768e-05	0.088894	0.000110311	0.0125634	0.00116184	0.00117813	-0.00323573	0.101303	0.0827028	-0.000378465	-0.0176436	0.0670788	-1.43218e-05	0.000229098	-0.000604558	0.154166	-0.000202912	0.00019013	-0.000411381
17	2.5	0.1	10	3.62939	0.00118766	0.000362022	0.0332377	0.00073501	0.0452804	0.000280427	0.00128266	0.00254507	-0.0572587	0.06472	0.00235001	0.00470266	0.0388359	0.000488023	0.000525059	0.00145437	0.0262597	0.000487188	0.000290706	0.00103275
17	2.5	0.1	10	-2.6602	-0.000191048	0.000256359	0.0942956	0.000440756	0.0245746	0.000639746	0.000949804	-0.000738993	0.0037609	0.0512185	0.000603127	-0.0108281	0.0591209	7.45602e-05	1.22633e-05	0.000652829	-0.0424544	0.00022412	0.0001039	0.000550897
17	2.5	0.1	10	3.87214	0.000946266	0.00032396	-0.0745137	0.000608896	0.0238859	0.00264285	0.00213745	-0.00124201	0.176992	0.150846	0.000750465	-0.00823367	0.0486087	0.000171067	0.000379599	0.000527898	0.0632035	0.000337136	0.000148724	0.000335307
17	2.5	0.1	10	2.86379	0.000495951	0.000174192	-0.0197746	0.000227389	0.0195011	0.00346403	0.0021384	0.00385454	0.118339	0.110704	0.0017381	-0.00485728	0.0643644	0.000251758	0.000593374	0.000862907	0.0872907	0.000240919	0.000377803	0.000303208
17	2.5	0.1	10	-2.74104	-0.000284546	-5.31204e-05	0.183326	-0.000190357	0.017749	0.00117053	0.00124692	0.000234903	0.0295204	0.0705141	0.000466648	-0.0154576	0.0915114	-0.000145679	-5.1161e-05	0.000668031	-0.0596525	3.86892e-06	-6.80168e-05	0.000255577
17	2.5	0.1	10	-2.86928	-0.000680236	-4.94026e-05	0.199391	-0.000366308	0.0077464	0.000491645	0.000870566	-0.00713267	0.17118	0.0755425	-0.00179989	-0.0233171	0.0277609	-0.000185283	-0.000137598	-0.000706059	0.0263816	2.4851e-05	-0.00013059	-8.11959e-05
17	2.5	0.1	10	4.04868	0.000331134	0.000171863	0.0658505	-0.000271446	0.015804	0.00780058	0.00795278	0.00553118	0.321395	0.41025	-0.000863661	-0.0189265	0.0502643	-0.000140826	0.00049204	-1.0836e-05	0.155659	0.000293454	-1.05402e-05	0.000218579
17	2.5	0.1	10	2.51304	0.000168125	0.000281606	-0.0270791	6.81823e-05	0.0278974	0.00438581	0.0070399	-0.00166537	0.33924	0.575514	-0.000216897	-0.0173791	0.0737936	-0.000168177	-3.12499e-05	0.000103688	-0.0162801	1.46483e-05	-0.000128954	0.00049201
17	2.5	0.1	10	2.59761	-0.000219753	8.67211e-05	-0.050371	-2.38657e-05	0.0142278	0.00245542	0.00158571	-0.00314664	0.225672	0.122079	-0.000545685	-0.0194959	0.0770376	-0.000255674	-0.000366535	-0.000211094	-0.0997707	-0.000202185	-7.74807e-05	-8.38598e-05
17	2.5	0.1	10	-2.19696	0.00015234	0.000244834	0.0630543	0.000162789	0.0108895	0.00278524	0.00223165	-0.000680492	0.172315	0.152269	-0.00101244	-0.0202437	0.0541088	-0.000364671	-0.000230158	-0.000460833	-0.0342218	-0.000119362	0.000154689	-0.000309026
17	2.5	0.1	10	2.58511	0.000251367	6.01869e-05	0.0730602	-0.000178642	0.0299953	0.00196622	0.00140947	-0.00407472	0.213721	0.113768	-0.000404971	-0.015111	0.0434703	-2.61053e-05	0.000108766	-0.000540991	0.0991461	2.16889e-05	0.000259418	5.14934e-05
17	2.5	0.1	10	0.163016	-1.28973e-05	9.08466e-05	0.00147365	-0.000338183	0.0171059	0.0028332	0.00176544	-4.31477e-05	0.158941	0.110652	4.30702e-05	-0.0147519	0.0632916	-9.78681e-05	0.000394682	0.000373573	0.0821112	0.000271917	0.000656163	0.000212405
17	2.5	0.1	10	3.10595	0.000427738	0.000163171	0.0183157	-0.000173432	0.0133203	0.000683184	0.000971379	-0.00490768	0.100725	0.0715759	-0.00112864	-0.0211176	0.0557799	-0.000480595	-0.000306183	-0.000448923	-0.0626099	-1.59563e-06	2.59598e-05	-0.000148819
17	2.5	0.1	10	-1.36674	4.86602e-05	-9.4999e-05	-0.0977695	-0.000430498	0.0140844	0.000633791	0.000974813	-0.00224566	0.02845	0.0583621	-0.000606979	-0.0179054	0.0561318	-0.000301096	-3.29151e-05	-0.000338439	0.0235556	-0.000219621	0.000115104	-0.00036854
17	2.5	0.1	10	0.0983309	-0.00027651	-4.19088e-05	0.0786454	-0.000594731	0.00815364	0.0044975	0.00625696	-0.00127726	0.331729	0.492613	-0.00104946	-0.0196745	0.0456083	-7.46019e-05	0.000188431	-0.000546494	0.129608	0.000121541	0.000169153	-0.000245265
17	2.5	0.1	10	3.08365	0.000223097	1.32469e-05	0.0120856	0.000403833	0.0274932	0.0012796	0.00116122	-0.00192245	0.0790321	0.0734598	0.000323376	-0.00918827	0.0375945	0.000475538	0.0007287	0.000263226	0.189177	0.000226047	9.99095e-05	0.00041244
17	2.5	0.1	10	2.73217	-0.000216164	-6.7704e-05	-0.0228739	-0.000303516	0.0174549	0.00197512	0.00155536	-0.00328812	0.183649	0.120565	-0.000656621	-0.0195377	0.0702089	-0.000147453	-4.60574e-05	-0.000330375	0.0181779	-0.000173666	-0.000185371	-1.74548e-05
17	2.5	0.1	10	-0.726277	0.000658665	0.00030634	0.00293678	0.000373236	0.0277074	-0.000204642	0.000982796	-0.00211414	-0.048671	0.0585674	-0.000491785	-0.017325	0.0573889	-0.000280643	-1.17453e-05	0.000229222	-0.0202336	1.02041e-05	0.000373632	-2.53955e-05
17	2.5	0.1	10	0.477264	1.81121e-05	-1.40497e-05	0.0188662	0.000198939	0.0248243	0.00242874	0.00176736	-0.00220173	0.188702	0.129317	-0.00110824	-0.0217845	0.065673	3.62045e-05	0.000283252	0.000641359	0.0282432	-0.000200404	3.58106e-05	0.000115612
17	2.5	0.1	10	-3.76677	-0.000672586	-0.000166514	-0.117545	-0.000152784	0.00470548	2.80433e-05	0.000925745	-0.00320393	-0.0113901	0.057603	-0.000255889	-0.0177466	0.075367	-0.000225743	0.000181296	-0.000874528	0.183699	-0.000322275	-3.33297e-05	-0.000662227
17	2.5	0.1	10	-1.60678	0.000869512	0.00014082	-0.0504875	0.000346475	0.0189688	0.00356219	0.00230317	-4.6426e-05	0.213842	0.151111	-0.000556413	-0.0198334	0.08045	-7.78302e-05	-0.000293518	-0.000700523	-0.035923	-5.49751e-05	0.000232004	-0.000324582
17	2.5	0.1	10	2.95856	0.000743689	0.000311514	0.00196862	0.000335583	0.0358875	0.00585561	0.00560475	0.00391086	0.255955	0.311274	0.000845849	-0.0102711	0.065327	0.000248491	0.00052438	0.00103475	0.0562914	0.000311099	-2.29159e-05	0.000841308
17	2.5	0.1	10	0.868679	-0.000355621	-6.71895e-05	-0.0291925	-0.000663942	0.019146	0.00187407	0.00161585	-0.00504861	0.249075	0.150216	-0.00164402	-0.0250185	0.067277	-0.000494277	-0.000355753	-0.0007714	-0.0541797	-0.000162651	-0.000114659	5.82368e-05
17	2.5	0.1	10	2.62137	0.00124132	0.000297605	-0.00545273	0.000785915	0.0401333	0.00360413	0.00282893	0.00233774	0.156327	0.163973	0.00126199	-0.0107216	0.0859038	0.000374287	0.00068033	0.00205702	0.0206498	0.000127436	-4.5098e-06	0.00122817
17	2.5	0.1	10	-0.504715	0.000272366	9.27362e-05	-0.040075	-0.000301495	0.021207	0.00221128	0.00252087	-0.00352487	0.216515	0.221427	-0.00115156	-0.0219087	0.0639373	-0.000359053	-6.17706e-05	-3.24648e-05	-0.0145701	-0.000161458	8.67695e-05	8.45533e-05
17	2.5	0.1	10	3.1815	0.000176316	4.85307e-05	-0.00429816	-0.000148729	0.0308951	0.000689784	0.00107129	0.00148095	-0.0206893	0.0540181	0.000565401	-0.0110173	0.0588367	5.82506e-05	0.000467288	0.000789406	0.0626512	0.000160723	9.25008e-05	0.000414314
17	2.5	0.1	10	-2.58432	-0.000314595	0.000384393	0.221918	1.39976e-05	0.0307322	0.0051807	0.00490528	-0.000684364	0.361631	0.36349	0.000336682	-0.0126821	0.0608234	0.000300087	0.000295271	0.000882179	0.0130801	0.000287126	4.66346e-05	0.000754519
17	2.5	0.1	10	5.24852	0.00110589	0.000584586	-0.032063	0.00159761	0.0266175	0.00532611	0.00614174	-0.00241184	0.460839	0.531618	-0.000167729	-0.013712	0.0448938	0.000350716	0.00098883	-0.000187728	0.3443	6.85103e-05	2.96048e-05	0.000282074
17	2.5	0.1	10	-0.377813	0.000195638	0.000196496	0.256409	0.000424206	0.028617	0.00228751	0.00123085	0.009461	-0.00710035	0.047429	0.000747797	0.00887609	-0.0117219	0.000411028	0.000291502	0.000452522	0.0463192	-0.000132213	0.00024971	-0.000383771
17	2.5	0.1	10	-1.95792	0.000226512	7.24583e-05	-0.207704	0.000209757	0.0127256	0.00195819	0.00255255	-0.00516544	0.265518	0.266665	-0.000687891	-0.0188529	0.060656	-0.000268471	-0.000135652	-0.000542855	0.00846311	-0.000120946	0.000161153	-0.000173149
17	2.5	0.1	10	-2.32001	-0.000312179	0.000304828	-0.03447	-0.000342051	0.0148652	0.00179186	0.00109055	-0.00189417	0.123124	0.0671441	-7.06205e-05	-0.0164466	0.0726825	-0.000230571	-0.000378243	0.000175709	-0.123745	5.55129e-05	-0.000137055	0.000143004
17	2.5	0.1	10	2.06787	0.00065018	0.000353148	0.065838	0.00044523	0.0245237	0.00431973	0.00342594	0.00288059	0.189109	0.19579	0.000175488	-0.0166177	0.0879976	4.93317e-05	0.000208415	0.000586108	0.0131054	-1.50483e-05	4.35666e-05	8.12475e-05
17	2.5	0.1	10	3.21395	0.000868855	-6.27031e-05	-0.0407306	0.000480052	0.0356137	-7.25835e-05	0.000875176	0.00159681	-0.0729637	0.0405918	0.00134769	-0.00900701	0.0765029	0.000158118	0.000330697	0.000980802	0.0146146	-1.04402e-05	0.00104097	0.000395399
17	2.5	0.1	10	2.91589	0.00128976	0.000408303	-0.0619556	0.000927729	0.0384825	0.00490724	0.00392692	0.00104457	0.277299	0.25365	0.00125186	-0.00738755	0.0622293	0.000382422	0.000280055	0.00109223	-0.00471164	0.000316239	5.72258e-05	0.000813112
17	2.5	0.1	10	1.16929	-0.00038874	-0.000143797	-0.0531073	-0.000344245	0.0115152	0.00138988	0.0012843	-0.00569428	0.222173	0.118275	-0.00201096	-0.0272222	0.0689192	-0.000288157	0.000227618	-0.000490482	0.135524	-0.00027608	-6.53506e-05	-0.000147522
17	2.5	0.1	10	-0.587626	0.00026386	0.000107736	-0.0637771	0.000458816	0.0366956	0.00481331	0.00481543	0.000606101	0.285004	0.324833	0.000834404	-0.0114955	0.0738207	0.000387565	0.000245133	0.000421421	0.0364058	0.000249195	0.000615597	0.000576946
17	2.5	0.1	10	-0.417658	-0.000173723	-0.000149172	-0.0117137	-0.000626089	0.0136621	0.000519459	0.000958567	-0.00276132	0.0279043	0.0589305	-0.000765338	-0.0205329	0.0748373	-0.000238085	0.000214399	-0.000556557	0.140864	-0.000196796	0.000447773	-0.000379765
17	2.5	0.1	10	2.53423	0.000502857	0.000270362	0.116546	-3.03111e-05	0.0187195	0.00490554	0.00761136	-0.000910683	0.349398	0.587463	-7.43376e-05	-0.0174399	0.0826975	0.000143425	0.000444774	0.000462979	0.0868935	-2.20029e-05	0.000208673	0.000100475
17	2.5	0.1	10	-2.87763	-0.000369175	0.000551404	-0.0238981	8.03479e-05	0.022403	0.00321512	0.00234512	7.75914e-05	0.184327	0.152981	-6.00439e-06	-0.0177088	0.0896982	0.000230962	0.000488959	0.000784868	0.0684362	-6.44396e-05	-0.000166274	0.000414228
17	2.5	0.1	10	-1.41097	0.000300715	0.000392916	0.0660655	0.00065004	0.0312507	0.00455505	0.00312803	0.00282993	0.204821	0.177938	0.000965238	-0.0112408	0.0774635	0.000450819	0.000625421	0.00100953	0.0821268	2.99974e-05	0.000288994	0.000188815
17	2.5	0.1	10	-0.479917	-0.000156923	6.56766e-05	-0.142312	-0.000501613	0.0207616	0.00412221	0.00251903	-0.000809078	0.282603	0.1766	-0.00134767	-0.023596	0.0719351	-0.000371795	0.000243858	0.000376381	0.0400114	5.20455e-05	0.000242161	6.55074e-05
17	2.5	0.1	10	-2.94462	-0.000102476	7.52341e-05	-0.201262	-5.57766e-05	0.00607377	0.00233915	0.00247222	-0.00439953	0.269783	0.236153	-0.00148216	-0.024814	0.0801279	-0.000424034	-0.000207451	-0.000282157	-0.0414521	-0.000273734	-4.19713e-05	-0.000235826
17	2.5	0.1	10	-2.84328	-0.000425449	0.000146179	-0.112679	-0.000170065	0.0134964	0.004105	0.00550599	-0.00172962	0.317947	0.446552	-0.000475591	-0.0187114	0.0724914	-9.42076e-05	0.000225054	0.000710425	0.00806203	4.28121e-05	0.000123893	0.000277928
17	2.5	0.1	10	-1.10158	-0.000233713	6.04745e-05	0.0596615	3.29414e-05	0.0188209	0.00137167	0.000974597	-0.00269697	0.106672	0.0601717	-0.000592919	-0.0192728	0.0713352	-0.000185002	0.000142036	0.000140774	0.0322151	-0.000132038	0.000170659	1.69913e-05
17	2.5	0.1	10	2.33273	0.000525439	0.000439267	0.148294	0.000312349	0.0256617	0.00527302	0.00210121	0.0103003	0.112952	0.0830937	0.00117413	-0.0109693	0.0841889	0.000356245	0.000807943	0.00129702	0.0994079	0.000143753	0.000198658	0.000179716
17	2.5	0.1	10	2.4824	0.000259503	0.000285228	-0.0124496	0.000476137	0.0196359	0.00377649	0.00280216	0.000543325	0.212461	0.181269	0.000723605	-0.0124027	0.0761217	0.000204316	0.000257924	0.000198328	0.0607637	-0.000155191	6.91708e-05	-0.000311044
17	2.5	0.1	10	-0.512414	0.000103201	-8.97998e-06	0.0304369	0.000100964	0.0284504	0.00213568	0.001577	-0.00251029	0.172213	0.114997	-0.000722148	-0.0185316	0.055239	-0.000151643	8.02709e-06	-0.000485712	0.0547936	0.000104768	0.000385022	7.2953e-05
17	2.5	0.1	10	2.61904	-9.34892e-05	3.01199e-05	-0.00660272	-0.00014381	0.0212885	0.00117819	0.000959721	-0.0016748	0.0648016	0.0549572	0.000182364	-0.0145652	0.0686587	-2.91714e-05	0.000288408	-2.44565e-06	0.0914406	-0.00017438	5.70246e-05	5.42865e-05
17	2.5	0.1	10	2.83405	0.000628943	9.70096e-05	-0.0985335	0.000460359	0.0279355	0.000185972	0.000915285	-0.00112953	-0.027446	0.0495444	0.000725155	-0.0120327	0.0732329	-4.07012e-05	0.000278283	0.00154128	-0.0310469	8.64375e-05	0.000190069	0.000556094
17	2.5	0.1	10	-3.02925	1.93877e-05	0.00019603	0.00341724	-7.41483e-05	0.00848368	0.00257736	0.00178214	-0.00320638	0.240102	0.142083	-0.000384954	-0.0178627	0.0689324	-4.81939e-05	-1.79818e-05	-0.000352964	0.0302809	-0.000128045	-6.28539e-05	-0.000218109
17	2.5	0.1	10	-2.97567	-0.000144158	0.000271855	-0.0501513	0.000362872	0.0234152	0.00509496	0.00447438	0.00214556	0.256769	0.272043	0.0014023	-0.0115628	0.0989171	0.000122321	0.000228197	0.000924258	-0.00603902	-5.89327e-05	6.13134e-05	0.000616485
17	2.5	0.1	10	-1.98867	0.000165491	0.000274548	-0.0328009	3.8088e-05	0.0170318	0.00234319	0.00192793	-0.00374956	0.239596	0.16446	-0.000747687	-0.0190638	0.0590594	-0.000208719	-4.00331e-05	-0.000516893	0.0409361	-5.16323e-05	0.000181384	-0.000203594
17	2.5	0.1	10	3.33394	0.000533844	0.000220208	-0.0747259	7.00551e-05	0.0228991	0.00423536	0.00681587	-0.00204472	0.343427	0.574498	-0.000888437	-0.0201186	0.0612641	-9.76332e-05	0.000442966	0.000394503	0.0933369	0.000223272	0.00028511	0.000364617
17	2.5	0.1	10	1.3282	0.000344978	0.000183254	-0.0872254	0.00020553	0.018185	0.00319432	0.00194289	0.00140057	0.150043	0.11334	0.000262563	-0.0149024	0.0756742	0.000257066	0.000293047	-0.000406918	0.146382	-0.000215099	8.35207e-05	-0.00016283
17	2.5	0.1	10	-3.11107	-0.000659893	-0.000101902	0.00357181	-0.000425886	0.00648878	0.00140724	0.00115239	-0.00546154	0.212441	0.0984993	-0.00140346	-0.024002	0.0734317	-0.000372796	-0.000243684	-0.000645924	-0.0218099	-0.000332975	-0.00016421	-0.000271505
17	2.5	0.1	10	1.98912	-0.000283931	7.46568e-07	0.072531	-9.03368e-05	0.0167888	0.00329602	0.00242773	-0.00442126	0.378113	0.231705	-0.00112727	-0.0194885	0.0386407	-8.08818e-05	-5.48492e-05	-0.000494792	0.0329221	8.98587e-06	6.43045e-05	-9.4044e-06
17	2.5	0.1	10	-2.9597	-0.000388662	0.000362107	0.113692	5.17091e-05	0.0194518	0.00513828	0.00487889	0.000282152	0.319956	0.336851	0.000913761	-0.011027	0.0736378	0.000429385	0.000459916	0.000854516	0.0553751	4.15806e-05	8.7339e-05	0.000103992
17	2.5	0.1	10	-0.167247	0.00022126	0.000226381	0.0553887	-0.000131373	0.0198223	0.00274042	0.00224265	-0.00177379	0.201926	0.166172	-0.000619646	-0.018457	0.0608253	-0.000113553	0.000239606	-0.000148474	0.0932342	-1.66999e-05	0.000114558	-6.21133e-05
17	2.5	0.1	10	-2.24671	-0.000283703	0.000131373	-0.143773	0.000284095	0.0225375	0.00412306	0.00453171	-0.00185357	0.324913	0.366421	-0.000356564	-0.0188272	0.0813001	-0.000197407	8.37855e-06	-4.8324e-05	0.00880126	-0.000192717	0.000218919	0.000176171
17	2.5	0.1	10	3.39268	0.000503517	0.000246121	0.151335	5.89928e-05	0.0266597	0.00473611	0.00502336	0.000359909	0.287762	0.345567	0.00030738	-0.0141208	0.0709917	0.000285364	0.000797359	0.000854567	0.137978	0.000108934	7.17041e-05	0.000194457
17	2.5	0.1	10	2.31711	0.000229747	3.26647e-05	0.0432735	-0.000105098	0.017607	0.00384274	0.00378607	0.000833966	0.209046	0.247258	-0.000154468	-0.0182127	0.0866328	-3.07292e-05	0.00041825	0.000843679	0.0460417	-0.000131425	0.000148492	-7.00769e-05
17	2.5	0.1	10	2.93541	0.000593942	3.85018e-05	0.00194493	0.000210834	0.0343717	0.000160062	0.00094096	-0.000384882	-0.0383294	0.0495517	0.00188052	-0.00671654	0.0807098	0.000287427	0.000614559	0.00423194	-0.0759669	0.00084783	0.000153972	0.000886489
17	2.5	0.1	10	2.22963	0.00122333	0.000775183	0.04305	0.0004528	0.0442398	0.00635993	0.00590798	0.00723284	0.209751	0.278211	0.00247504	-0.00267873	0.0758815	0.000848298	0.00105938	0.00247592	0.0649614	0.000464601	0.000278998	0.000630532
17	2.5	0.1	10	-2.85319	-0.000616756	-3.97574e-05	0.00258233	-0.000441262	0.0131057	0.00272364	0.00300886	-0.00444921	0.315528	0.297714	-0.000900646	-0.0206552	0.06675	-0.000272271	2.96441e-05	-0.000537917	0.0693257	-0.000108113	0.000194658	-0.000139293
17	2.5	0.1	10	2.49148	0.000431753	4.69841e-05	-0.123062	0.000244287	0.0306927	0.0035926	0.0038154	-0.00307232	0.333423	0.33836	-0.000985964	-0.0205085	0.0589489	-7.74129e-05	0.000222962	-0.000372794	0.116757	7.78332e-05	0.000100209	0.000205536
17	2.5	0.1	10	0.262172	0.000593213	0.000224252	-0.0535564	0.000271897	0.0217715	0.00605855	0.00925858	-0.00115159	0.45446	0.733863	-0.000923432	-0.0206318	0.0648411	0.000157478	0.000573495	0.000312925	0.138785	-0.000251418	0.00023077	0.000174615
17	2.5	0.1	10	2.46858	0.000822055	0.000223951	0.017158	0.000488405	0.0260539	0.00145335	0.00152171	0.00211003	0.0221481	0.0815818	0.000919342	-0.0125152	0.085875	0.000488357	0.00105655	0.00240819	0.0686104	0.000177574	0.000128707	0.000158286
17	2.5	0.1	10	-2.85491	-0.000407554	5.2043e-05	-0.099312	-0.000131119	0.0201527	0.00441475	0.00485756	-0.00231322	0.372479	0.410592	-0.000381964	-0.0175016	0.065453	-2.02924e-05	0.000107939	-0.00042373	0.0829854	7.09162e-06	2.07941e-05	7.78254e-05
17	2.5	0.1	10	-1.57274	0.00028251	0.000170975	0.120295	0.000363061	0.033524	0.00372993	0.00246471	0.00279835	0.154465	0.137166	0.000596167	-0.0127588	0.0732452	0.000355866	0.00066772	6.89138e-05	0.198362	2.05057e-05	0.000599053	6.69999e-05
17	2.5	0.1	10	2.4798	0.000113796	-2.40073e-05	0.0875498	0.000385554	0.0249738	0.00500012	0.0050522	-0.00381671	0.52142	0.493413	-0.000908613	-0.0188272	0.0464557	-4.10921e-07	2.2282e-05	-0.000201467	0.0280243	0.000112515	0.000222807	0.000130345
17	2.5	0.1	10	2.60017	0.000844413	0.00031313	-0.0633999	0.000650559	0.0246652	0.00520625	0.00626126	0.000999518	0.299587	0.417135	0.000490162	-0.012669	0.0677002	0.000373011	0.00101849	0.00119416	0.155829	0.000279471	0.000394006	0.000349166
17	2.5	0.1	10	0.33672	-8.56827e-05	4.96192e-05	-0.0640166	9.92369e-05	0.0287603	0.000909923	0.000924132	0.000494888	0.00671512	0.0461515	1.66674e-05	-0.0135007	0.0521104	-2.43596e-05	0.000528122	0.000784582	0.0782154	0.000103253	9.07277e-05	0.00013619
17	2.5	0.1	10	1.8597	-0.000193836	-1.34341e-05	-0.0982822	-0.000195281	0.0159573	0.00193353	0.0014947	-0.0046456	0.235937	0.130035	-0.00163017	-0.0248353	0.0654802	-0.000193791	0.000188787	-0.000784738	0.169715	-0.000356699	8.15425e-06	-0.000268273
17	2.5	0.1	10	-3.01186	-0.000343464	4.715e-05	-0.0786298	-0.000325524	0.0136176	0.00084878	0.000977261	-0.00491414	0.120584	0.0723169	-0.00133456	-0.0225715	0.0580557	-0.000290603	-0.000124313	-0.000513915	0.00955761	1.20906e-05	-0.000193004	-3.89578e-05
17	2.5	0.1	10	2.54305	0.000222935	0.000178073	-0.0842444	1.29587e-05	0.0336608	0.000700325	0.00111438	-0.00344144	0.0605874	0.0776676	-0.000977104	-0.0211516	0.0673934	-8.48021e-05	0.000103698	0.000136331	0.0212404	1.71868e-05	-0.000112615	9.28564e-05
17	2.5	0.1	10	-3.2934	-0.000476909	0.000151886	0.000571743	-0.000515769	0.00863041	0.000195003	0.000902915	-0.00537679	0.0561072	0.0663031	-0.000919326	-0.0200521	0.0583959	-0.000448353	-0.000361067	-0.000833873	-0.0504945	-0.000159493	-0.000262005	-0.00023877
17	2.5	0.1	10	-2.82595	-0.000354095	0.000118903	0.01781	-0.000253517	0.0246465	0.00386907	0.00495894	-0.00317445	0.365784	0.454043	-0.000391232	-0.0184014	0.0742995	-0.000132415	0.000117611	0.00016093	0.0231534	6.13766e-05	0.000180007	7.11891e-05
17	2.5	0.1	10	-3.21133	-0.000639914	2.75485e-05	0.0440892	-0.000388773	0.0195743	0.00201215	0.00151847	-0.00369822	0.203035	0.12122	-0.000734905	-0.021056	0.0839744	-0.000293632	-1.65657e-05	-0.000619956	0.0626211	-0.000112771	0.000356652	-0.000192782
17	2.5	0.1	10	-1.36499	0.000223757	-1.79091e-05	-0.0896236	0.0006241	0.0141641	0.00152309	0.00113341	-0.00102395	0.0797537	0.0669534	-0.000135039	-0.0181812	0.0874452	-9.41545e-05	-0.000271466	-0.000307691	-0.0612655	-0.000244387	0.00064651	-0.000648224
17	2.5	0.1	10	-1.39378	0.000262551	-6.9901e-05	-0.125233	-0.000167296	0.0179215	0.00229495	0.00217328	-0.00310132	0.208202	0.178966	-0.00131353	-0.0242922	0.0870797	-0.000377664	-4.06411e-05	-0.000316926	0.0186577	-0.000208271	0.000436302	-0.000217235
17	2.5	0.1	10	2.90738	7.63703e-05	0.000260524	0.120234	-0.000392317	0.0234498	0.00675574	0.00810171	0.00346378	0.321157	0.467701	-0.000972054	-0.022398	0.0852918	-0.000181535	0.000555111	0.000472469	0.11575	0.000224057	0.000185389	0.00053624
17	2.5	0.1	10	2.53429	0.000168319	0.000151228	0.00316348	-0.000160602	0.0200788	0.00447939	0.00224815	0.00420316	0.170233	0.115061	-0.000330239	-0.0188444	0.0831664	-0.000134993	0.000330781	0.00082874	0.0256949	9.7408e-05	-2.831e-05	0.000380694
17	2.5	0.1	10	-3.11399	-0.000656996	-6.12819e-05	0.139324	-0.00057737	0.0131865	0.00134923	0.000938701	-0.00366592	0.133259	0.0609659	-0.000214629	-0.015717	0.0582526	-0.000110898	-0.000124809	-0.000831812	0.0478086	-5.23584e-05	-9.10443e-05	-1.8253e-05
17	2.5	0.1	10	-2.6049	8.67668e-05	-0.000121298	-0.133506	-0.000458319	0.00872374	0.000108165	0.000859639	-0.00496884	0.0341396	0.0586472	-0.00115969	-0.023438	0.0861854	-0.000460831	-0.000302333	-0.000951409	-0.0128539	-0.000316321	0.000244112	-0.000504213
17	2.5	0.1	10	-0.324199	-8.11805e-05	-0.000100843	0.046535	-0.000230395	0.0270131	0.00146624	0.00125158	-0.00148154	0.0850603	0.0789112	-0.000482222	-0.0198469	0.0856238	-0.000275558	-8.89569e-05	-0.000247423	-0.00451267	-0.000189139	0.000212333	-8.89757e-05
17	2.5	0.1	10	2.79875	0.000602683	0.000514844	0.0508298	0.000192134	0.0350822	0.0071443	0.00828354	0.00691767	0.254555	0.399542	0.00162567	-0.00815225	0.081142	0.000596565	0.000872614	0.0016153	0.087793	0.000397848	0.000394427	0.00088172
17	2.5	0.1	10	-1.86943	1.22908e-05	0.000207996	0.090389	-0.000144796	0.0286507	0.00283551	0.00173597	-0.000780338	0.179132	0.113908	-0.00028393	-0.0167482	0.0637673	-1.56736e-05	0.000388443	0.000984312	0.0280698	0.000179002	-2.36894e-05	0.000433831
17	2.5	0.1	10	2.32594	-3.65148e-05	0.00016521	-0.00458574	-8.69045e-05	0.0253282	0.00340674	0.00289948	-0.00108413	0.234672	0.211251	-0.000469609	-0.0192335	0.0788756	-5.96657e-05	0.00032075	-0.000375168	0.151336	-0.000142107	-3.47134e-05	0.000272284
17	2.5	0.1	10	-3.39473	-0.000351132	0.00032737	0.0917885	-0.000196792	0.0233743	0.000687118	0.00105656	-0.00136126	0.0173635	0.0619976	-0.000199823	-0.0178547	0.0798597	-7.62077e-05	-1.98836e-05	0.000208262	-0.0210132	9.4346e-05	-0.000177065	0.000273079
17	2.5	0.1	10	-2.67637	-0.000462173	-9.32749e-05	0.0266864	-0.000297516	0.0143059	0.00168865	0.0014765	-0.0048721	0.218209	0.130956	-0.00131781	-0.0234563	0.0723974	-0.000189804	0.000162653	-0.00067888	0.140789	-0.000342063	-7.90303e-07	-0.000229321
17	2.5	0.1	10	0.0782432	-3.44246e-05	8.29267e-05	0.182466	-0.000145604	0.0181294	0.00330183	0.00243158	-0.000784349	0.216373	0.16932	-0.000716055	-0.0201135	0.0730483	0.000157582	0.000348837	-0.000490314	0.179739	-0.000208779	7.57141e-05	-0.000252902
17	2.5	0.1	10	-2.62882	-0.000451525	-8.3701e-05	0.178019	-0.000399275	0.0249905	0.000313187	0.000911855	-0.00228711	0.000245463	0.0528304	-0.000207533	-0.0175012	0.0756086	-0.000171097	0.000186633	8.23038e-06	0.0587883	-4.80464e-05	0.000134107	0.000156292
17	2.5	0.1	10	1.31792	0.000448112	5.23941e-05	-0.100423	2.83446e-05	0.0115739	0.00438221	0.00293648	0.000618097	0.253728	0.189999	-0.000166531	-0.0185161	0.0894812	4.73423e-05	0.00029532	0.000133356	0.078475	-0.000235398	0.000291851	-0.000388678
17	2.5	0.1	10	2.79348	6.15819e-05	7.87406e-05	0.058104	-0.000176193	0.0249452	0.00283044	0.00176946	-0.00231559	0.228951	0.130685	-0.000450753	-0.0167658	0.0546152	-9.36196e-05	0.000258987	-7.12785e-06	0.0828532	9.25638e-05	3.67147e-06	0.000253083
17	2.5	0.1	10	0.0235401	0.00026295	0.000224681	-0.0591809	0.000298033	0.0283561	0.00183615	0.00130849	-0.000823019	0.100553	0.0801052	0.000728116	-0.0129215	0.080644	0.000154544	0.000197728	0.00045325	0.0207976	8.61044e-05	0.000211626	0.000169054
17	2.5	0.1	10	-1.06014	-0.000209945	9.21128e-05	-0.0237718	-0.000217858	0.0266493	0.00226095	0.0019149	-0.00213401	0.171496	0.141788	-0.000295017	-0.0160796	0.0571084	-0.00014683	1.43066e-05	9.06203e-05	-0.00152214	0.000162785	0.000179205	0.000154486
17	2.5	0.1	10	-3.04368	-0.000431636	9.68126e-05	0.0148766	-0.000334337	0.0112265	0.00559289	0.00367424	0.0018394	0.298409	0.224526	-0.00120846	-0.0227356	0.07086	-0.000353129	-6.35473e-05	-0.000194239	-0.000979923	0.000117634	0.000111295	0.000102513
17	2.5	0.1	10	3.11904	0.000544259	2.94628e-05	0.0287621	0.000270953	0.0332113	0.00196875	0.0012875	0.000605029	0.081127	0.071955	0.000376336	-0.0152875	0.0851293	0.000169669	0.00069159	0.00124953	0.0774643	-6.12298e-05	8.70642e-05	0.000383884
17	2.5	0.1	10	2.5731	0.000342471	0.000253118	0.00970164	0.00026154	0.02663	0.00409085	0.00215622	0.00387664	0.154351	0.111616	0.000700163	-0.0149528	0.0983295	0.00015907	0.000581117	0.00135222	0.0453332	2.46747e-05	0.000277251	0.000668893
17	2.5	0.1	10	0.903011	-1.79681e-05	-5.09068e-05	-0.00228323	-0.000480646	0.00905893	0.0015251	0.00200316	-0.00448966	0.182452	0.185431	-0.00165349	-0.0262726	0.0918447	-0.000512313	-0.000126895	-0.000185931	-0.0225509	-0.000250882	-6.49074e-06	-0.000205598
17	2.5	0.1	10	1.41819	0.000238439	0.000254233	0.0525034	0.000106586	0.0314136	0.00364008	0.00300575	0.000537908	0.202789	0.195999	0.000389068	-0.016617	0.0998208	0.000312865	0.000608409	0.000719236	0.10448	-9.39846e-05	0.000158565	0.000730524
17	2.5	0.1	10	0.0921017	0.000107316	0.000351605	0.0519164	0.000244278	0.0145303	0.00348666	0.00258754	-0.000833815	0.232722	0.182395	0.000170991	-0.0156371	0.0778287	0.0001615	0.00027561	-0.00023358	0.115865	-0.000137942	0.000167431	-0.000260987
17	2.5	0.1	10	-3.33107	-0.00028582	0.000306723	-0.0143442	-5.76807e-05	0.0142726	0.00141998	0.00132613	-0.00227062	0.0999177	0.0901835	-0.000378724	-0.0187701	0.0792385	-7.21281e-05	2.23523e-05	0.000190232	-0.00729729	5.31898e-05	-0.000104287	8.92238e-05
17	2.5	0.1	10	2.41988	0.00069215	0.000358174	-0.0319978	0.000517917	0.0229893	0.00416123	0.00311807	0.00215179	0.196338	0.184417	0.000748242	-0.0127748	0.0803211	0.000357786	0.000548946	0.000839304	0.0785074	-6.36452e-06	0.000327729	0.000175476
17	2.5	0.1	10	3.81817	0.000966708	0.000210388	0.0543902	0.000319836	0.0404933	0.0019671	0.00147353	0.00618091	0.00588288	0.0652731	0.00238541	-0.00543138	0.0898246	0.000588244	0.000815942	0.002244	0.0351325	0.000144674	0.000342416	0.000695096
17	2.5	0.1	10	2.2002	0.000362316	6.54614e-05	-0.000879754	-4.14292e-05	0.0206768	0.00304486	0.003176	-0.00196733	0.235216	0.250775	-0.000807996	-0.0224444	0.0994319	-0.0001033	0.000500699	0.000390667	0.109677	-0.000146527	0.000635074	0.000512279
17	2.5	0.1	10	2.94595	0.00058384	0.000398021	0.0451232	0.00046245	0.0443962	0.00527286	0.00512651	0.00243238	0.260066	0.308707	0.00189163	-0.00740105	0.0857733	0.000405793	0.000228548	0.00130464	-0.0289917	0.000229992	0.000547778	0.000688461
17	2.5	0.1	10	2.92384	0.000406598	0.000233966	0.00763239	4.63919e-06	0.0293693	0.0038658	0.00439699	-0.00183603	0.301786	0.354179	-0.000357965	-0.0187316	0.0800967	-0.000109851	-2.28813e-05	0.00146228	-0.0910237	0.000198193	0.000188547	0.000231964
17	2.5	0.1	10	2.70389	-3.44566e-06	0.000165534	0.0431143	-0.000202589	0.0292319	0.00385201	0.00352018	0.00468205	0.126071	0.18297	0.000218574	-0.00110654	0.000189086	6.3458e-05	0.000495969	0.000893253	0.0609619	0.000524831	0.000133023	0.000499671
17	2.5	0.1	10	1.05296	0.00102077	8.19714e-05	0.00106649	0.000514026	0.0230771	0.00214227	0.00223885	-0.00254429	0.173938	0.176591	-0.000526865	-0.0213901	0.104389	5.72704e-05	0.000658938	0.000366396	0.156306	-8.54178e-05	0.000213412	-0.000251219
17	2.5	0.1	10	-3.26631	-0.000720375	-1.59183e-06	-0.0378901	-0.000664958	0.0124956	0.00113702	0.00106149	-0.00281485	0.0876193	0.0689271	-0.0011486	-0.023041	0.0806197	-0.000398481	-0.000242219	-0.000452112	-0.0393364	-0.000158922	-0.000149168	-4.50118e-05
17	2.5	0.1	10	-0.876849	6.54171e-05	-3.73988e-05	-0.107939	-8.15102e-05	0.00346828	0.000663175	0.000819298	-0.00185087	0.0237758	0.0433492	-0.000441798	-0.0206307	0.0991331	-0.000310509	1.16155e-05	-9.39985e-05	0.014048	-0.000179117	7.4399e-05	-0.000607218
17	2.5	0.1	10	-3.06813	-0.000410407	0.000179115	0.13817	-0.000106245	0.0191863	0.0026975	0.00128719	0.000167296	0.143587	0.0737712	0.00122469	-0.00985032	0.0777065	0.000276728	0.000243619	0.000289791	0.0478302	0.000112485	7.3988e-06	8.38507e-05
17	2.5	0.1	10	2.17161	0.000492115	1.42741e-05	-0.0841057	0.000261459	0.0194212	-0.00038897	0.000760095	-0.00244208	-0.0615651	0.039446	-0.00011851	-0.0167215	0.0727322	-0.000152252	5.992e-05	0.000120473	0.00960411	9.66735e-05	0.000268947	3.98889e-05
17	2.5	0.1	10	2.89818	0.000599113	0.000186994	0.0841179	0.000167548	0.034929	0.00385021	0.00260931	0.00274555	0.163044	0.146553	0.000860014	-0.0137744	0.0945251	0.000369395	0.000880622	0.00173555	0.0804855	4.09862e-05	0.000268132	0.000552074
17	2.5	0.1	10	-3.25462	-0.000295054	0.000301181	0.0695751	0.00021613	0.0257299	0.00301992	0.0027721	0.00136331	0.139027	0.169966	0.00160489	-0.0091225	0.0873897	0.000369475	0.000797837	0.000944188	0.129106	7.59666e-05	6.35826e-05	0.000208067
17	2.5	0.1	10	3.45761	0.00119674	0.00035882	0.0886388	0.000306253	0.0327375	0.00415904	0.00283914	0.00361442	0.163573	0.153375	0.00204104	-0.00582296	0.0805283	0.000321257	0.000284673	0.000840302	0.013498	0.000146984	0.000371886	0.000447476
17	2.5	0.1	10	2.59961	0.000348788	7.6727e-06	0.0949485	-0.000163342	0.0261252	0.00268668	0.00177686	-0.000370721	0.156257	0.113943	-0.00060523	-0.0214737	0.0997759	-0.000126907	0.000411018	0.00065836	0.0597486	-1.20538e-05	0.000165547	0.000285102
17	2.5	0.1	10	1.97839	-0.000197507	2.94259e-05	0.0887619	-0.000207171	0.0286207	0.00123074	0.00112902	-0.00247136	0.0877192	0.0734398	0.000675125	-0.0152543	0.100194	3.97983e-05	0.000148833	0.000359269	0.0150676	-0.000204902	0.000141938	0.000187023
17	2.5	0.1	10	-0.33565	0.000435266	0.000278391	0.102076	0.000596566	0.0292489	0.00391252	0.00202018	0.00390945	0.143376	0.103548	0.000742468	-0.012491	0.0776918	0.000529199	0.000581491	0.0010062	0.0720428	-0.000186166	2.26252e-05	0.000154936
17	2.5	0.1	10	-0.953954	-0.000203205	0.000176001	0.104413	-0.00014222	0.0364666	0.00286664	0.00154948	0.00251974	0.105959	0.0816182	0.00162362	-0.01069	0.100733	0.000277164	0.000595341	0.00143478	0.0426137	-1.36921e-06	0.000291975	0.000515348
17	2.5	0.1	10	1.78968	0.000509304	7.98143e-05	0.0944138	8.09148e-05	0.0302714	0.00273105	0.002042	-0.000251051	0.156553	0.133289	0.000367103	-0.0160605	0.092522	0.000210794	0.000514619	0.00113454	0.0463528	-7.99058e-05	-4.24388e-06	0.000688173
17	2.5	0.1	10	-0.847827	0.000329238	0.00014177	0.0184199	0.000321824	0.0353933	0.00132868	0.000993924	0.000581542	0.0356096	0.0509704	0.000932107	-0.0114825	0.077934	0.000135484	0.000144637	0.000237256	0.0242614	6.37452e-05	0.000271491	0.000319741
17	2.5	0.1	10	2.3455	0.000146063	0.00016393	-0.0266102	5.80532e-05	0.0197216	0.00377699	0.00488072	-0.00271043	0.33322	0.427539	-0.000639234	-0.0191729	0.0672116	-0.00023923	-7.38571e-05	-0.000106625	-0.0121234	3.28084e-05	-0.00010845	0.000256677
17	2.5	0.1	10	1.48826	0.000960152	0.000754718	0.0355804	0.00100374	0.029262	0.00589745	0.00535443	0.00435212	0.247398	0.289746	0.00161239	-0.00669676	0.0709936	0.000951792	0.0013517	0.00171985	0.176794	2.62739e-05	0.000134355	0.000291529
17	2.5	0.1	10	2.71729	0.000200262	0.000268733	0.0223598	2.31929e-05	0.0212168	0.00291902	0.00167464	0.000535014	0.150919	0.100134	2.44243e-05	-0.0190466	0.1083	-6.11927e-05	4.52271e-05	0.00083041	-0.0447515	-2.84116e-05	-8.5074e-06	0.000279957
17	2.5	0.1	10	2.38133	0.00028282	3.21323e-05	0.0784846	-5.12955e-05	0.017635	0.0038447	0.00605297	-0.002144	0.313206	0.511344	-0.000646722	-0.0224811	0.113277	-9.48109e-05	0.000301818	0.000348908	0.0586655	-0.000156095	0.000194976	0.000369412
17	2.5	0.1	10	-1.70198	9.49494e-05	-9.77317e-05	-0.0957995	0.000160113	0.0122254	-0.000973936	0.000657648	-0.0034294	-0.108562	0.0315289	-0.000453946	-0.0195554	0.0838222	-0.000116042	0.000123832	-0.000634353	0.118607	-0.000300556	0.000421183	-0.000713055
17	2.5	0.1	10	0.158964	0.000264645	0.000254786	0.077584	3.95529e-05	0.0284459	0.00250751	0.0016667	-0.000417756	0.143628	0.10578	-0.000131727	-0.0166305	0.0711048	4.12224e-05	0.000100794	0.00046972	-0.00674194	-4.42159e-05	0.000340766	-4.89102e-05
17	2.5	0.1	10	-2.46311	-0.000422205	-0.000147514	-0.0448542	4.25761e-05	0.00890991	0.00401799	0.00313541	-0.00248884	0.344902	0.258353	-0.000788758	-0.0224962	0.101881	-0.000169844	-1.22009e-05	-0.000376986	0.0349242	-0.000364718	0.000117367	-3.57657e-05
17	2.5	0.1	10	-1.06238	-0.000547176	0.000155145	0.0220503	-0.000153458	0.0138827	0.00374565	0.00290504	0.00843789	0.0680582	0.125801	0.000145086	-0.0130611	0.0548611	0.000110117	0.000480175	0.00165228	0.00462867	0.000623755	3.77794e-05	0.000226048
17	2.5	0.1	10	2.93312	0.00138028	0.000387962	-0.0371215	0.000402832	0.0236143	0.00335191	0.00321387	0.00114769	0.166712	0.202751	0.000462308	-0.0165661	0.103291	0.000165084	0.00045798	0.00129923	0.0219608	-3.66625e-05	0.000293303	0.000546653
17	2.5	0.1	10	1.48691	0.000550199	6.95522e-05	-0.0650745	1.62761e-05	0.0144108	0.00333837	0.00276805	-0.00113825	0.230919	0.201353	-0.000490786	-0.0207229	0.0969689	-0.000280006	-0.000143933	3.38902e-05	-0.0451487	-0.000187412	3.56519e-06	-8.89493e-05
17	2.5	0.1	10	1.27594	-0.000109109	-2.87888e-05	-0.00177393	-0.000312993	0.0133251	0.001795	0.00138042	-0.00405327	0.19438	0.110414	-0.000785986	-0.0200534	0.0675324	-0.00022379	-7.32582e-05	-0.000783586	0.0624045	-6.28092e-05	-3.87867e-05	-3.74305e-05
17	2.5	0.1	10	-0.492509	-0.000338339	-0.00026754	-0.0457999	-0.000391403	-0.000358876	0.000185112	0.000831581	-0.00726451	0.128426	0.0704395	-0.00193711	-0.026783	0.0686084	-0.000355177	-0.000345899	-0.00160978	0.0690395	-0.00057594	-0.000197167	-0.000532058
17	2.5	0.1	10	2.4949	4.23324e-05	1.69713e-05	-0.0276184	0.000108684	0.0227022	0.00397679	0.00285867	-0.00276842	0.354937	0.238615	-2.71093e-05	-0.0140665	0.0542937	0.00013557	0.000203101	-0.000371815	0.109672	7.37757e-06	9.30589e-05	0.000105025
17	2.5	0.1	10	2.5465	0.000977123	0.000153703	0.0197461	0.000433731	0.029903	0.00245969	0.00165105	0.00359753	0.0636164	0.0833875	0.00153957	-0.0106069	0.0965297	0.000185012	0.00025486	0.00124059	-0.019502	-1.28938e-05	2.88841e-05	0.000279856
17	2.5	0.1	10	-0.129861	0.000572193	0.000307405	-0.00922559	0.000512934	0.0359799	0.0023463	0.00120648	0.00172274	0.0866602	0.0623671	0.00174626	-0.00913248	0.0930007	0.000203424	0.000144392	0.000393681	0.0110345	0.000103071	0.000348124	0.000304456
17	2.5	0.1	10	-2.63753	-0.000198994	0.000459134	0.00476419	0.000503394	0.0284273	0.00241015	0.00128631	0.00175705	0.0902779	0.0675462	0.00233157	-0.00572834	0.089961	0.000318658	6.44335e-05	0.00161233	-0.0788678	0.000136259	-5.81901e-05	0.000332077
17	2.5	0.1	10	2.17052	0.000260517	9.63308e-05	0.0905606	-8.30019e-05	0.0171334	0.0030716	0.00318075	-0.00102628	0.205509	0.233164	-6.36628e-05	-0.0196133	0.110468	-0.000147077	3.05941e-05	0.000263783	-0.0106917	-0.000141251	6.17754e-05	2.40796e-05
17	2.5	0.1	10	1.91914	0.000218576	6.52779e-05	-0.0132562	-0.000105514	0.013022	0.00298097	0.00199596	-0.00179695	0.223526	0.145112	-0.00145867	-0.0258955	0.105596	-0.000416008	-0.000226791	0.000364097	-0.0898309	-0.000122447	-0.000199083	2.10264e-05
17	2.5	0.1	10	1.98897	0.000829232	0.00016543	-0.0316948	0.000618311	0.0221225	0.00421433	0.00343193	-0.00102704	0.298303	0.253568	-2.4348e-06	-0.017453	0.0870161	-2.21914e-05	-0.000136327	-0.000104662	-0.032278	-8.32931e-05	0.000487109	-0.000140904
17	2.5	0.1	10	-3.30553	-0.000612562	-0.000177657	-0.0404109	-0.000419883	0.0135172	0.0019574	0.00140663	-0.00355331	0.191744	0.108229	-0.00106441	-0.0239796	0.104773	-0.000266297	-1.52461e-05	-0.000840043	0.0947759	-0.000393466	-0.000125852	-0.000146318
17	2.5	0.1	10	-0.774549	-7.4866e-05	0.000145691	0.0497936	-7.93567e-06	0.0232334	0.00241173	0.00166649	-0.00059384	0.140614	0.107015	9.22551e-06	-0.0182044	0.0964771	-0.000206249	-0.000272873	0.00054348	-0.11111	0.000119494	0.000164998	6.19026e-05
17	2.5	0.1	10	1.29278	0.000464096	0.000155282	0.0153855	0.000248382	0.00516877	0.00117509	0.00131923	-0.00376681	0.118398	0.101177	-0.000424817	-0.0216294	0.116053	-5.48467e-05	0.000188742	0.000473445	0.016728	-0.000172066	-6.65084e-06	-0.000116597
17	2.5	0.1	10	-1.25477	-0.000115338	-4.58152e-05	0.0192305	-0.000368737	0.0130222	0.000366373	0.000988366	-0.00623539	0.108976	0.0844953	-0.000994665	-0.0201939	0.0547892	-0.000255421	0.000148714	-0.000739354	0.145424	-7.00158e-05	3.77236e-05	-5.00988e-05
17	2.5	0.1	10	-0.212897	-0.000188569	9.75015e-06	0.0257384	-0.000109162	0.0119699	0.00307416	0.00305859	-0.0050562	0.394258	0.324403	-0.00119591	-0.0210536	0.050085	-0.000276851	-8.13149e-05	-0.00086989	0.0715327	-9.83209e-05	-8.19384e-05	-1.80141e-05
17	2.5	0.1	10	-3.57814	-0.000486314	0.000143397	0.142182	-0.000615147	0.0125731	0.00130217	0.00156513	-0.00217202	0.0868848	0.110913	-0.000169934	-0.0205284	0.116883	-0.000153242	-0.000109676	-0.000300598	-0.00657358	-0.000221393	-0.000111522	-0.000234159
17	2.5	0.1	10	2.11265	0.000151427	4.77636e-05	-0.10382	0.000134351	0.00412484	0.00170398	0.00169261	-0.0064215	0.310002	0.188078	-0.00124364	-0.0216468	0.0534734	-0.000277873	-0.000263099	-0.000553163	-0.0380288	-2.56899e-06	-0.000164294	-5.69991e-05
17	2.5	0.1	10	-3.37859	2.71463e-05	-2.45935e-05	-0.00485379	-4.1693e-06	0.00575339	0.00177644	0.00175475	-0.00359899	0.174928	0.144385	-0.00114811	-0.0243595	0.104376	-0.000442408	-0.000170404	-6.55979e-05	-0.0461108	-0.000265334	-9.73837e-05	-0.000371312
17	2.5	0.1	10	-2.72804	-0.000423943	-0.000240886	-0.0123462	-0.000544436	0.00921449	0.00214847	0.0018449	-0.00385091	0.223587	0.157309	-0.00120045	-0.0240087	0.0925847	-0.000324134	-0.000126047	-0.001025	0.0760168	-0.00040092	8.40624e-05	-0.000255957
17	2.5	0.1	10	1.60344	0.000159155	8.72965e-06	-0.100402	0.000287561	0.00581694	0.00196058	0.00160001	-0.00606919	0.321443	0.16698	-0.00178697	-0.0267263	0.0862721	-0.000308854	-0.000105119	-0.000791854	0.0505018	-0.000479461	3.67494e-05	-0.000234768
17	2.5	0.1	10	-3.53286	-0.000767461	-0.000114092	0.0555059	-0.000847111	0.000845922	0.000864952	0.00136782	-0.00649331	0.192701	0.142486	-0.00147763	-0.0254861	0.0941544	-0.000515413	-0.00048195	-0.000798206	-0.103571	-1.01996e-05	-0.000227982	-0.000310112
17	2.5	0.1	10	0.176133	-0.000139852	-0.00018836	0.0594767	-0.000495873	0.00640176	0.00198858	0.00167162	-0.00325057	0.183622	0.13169	-0.00101501	-0.0212793	0.0662043	-0.00021007	5.78617e-05	-0.000614148	0.0903078	2.74073e-06	0.0003119	-0.000322424
17	2.5	0.1	10	-3.18537	-0.000281513	0.000120714	0.0926637	3.71474e-05	0.019201	0.00168481	0.00107546	0.00171242	0.0429126	0.0536986	0.00108931	-0.0117239	0.0867074	0.000116031	0.00014347	0.000161186	0.0307552	-3.04624e-05	9.35702e-05	8.45545e-05
17	2.5	0.1	10	-2.56304	-0.0003293	-9.97978e-05	0.171037	-0.000285001	0.00946821	5.20037e-05	0.00109935	-0.00469236	0.0207399	0.0849633	-0.000718909	-0.0192787	0.0632168	-3.8487e-05	0.000499849	-0.00117885	0.407854	-0.000347315	0.000145715	-0.000457593
17	2.5	0.1	10	2.5281	0.000624597	0.000134192	0.0377744	0.000285742	0.0375649	0.00270497	0.00176923	0.00126467	0.119637	0.102366	0.00131917	-0.00864739	0.0729017	0.000482044	0.000527324	0.00062654	0.0927118	0.000159337	2.16543e-05	0.000578485
17	2.5	0.1	10	1.94854	0.00147475	0.000297145	-0.168324	0.000518355	0.0149526	0.00311441	0.00243548	0.00108754	0.151709	0.1496	0.000161757	-0.0179714	0.102804	-6.23994e-05	7.93235e-05	0.000395959	-0.0070922	-0.000159711	0.000192424	-3.45263e-05
17	2.5	0.1	10	2.17807	0.000221657	-1.13893e-05	0.0801467	-0.000245256	0.0204666	0.00252675	0.0018872	-0.000321247	0.142691	0.12204	-0.000108285	-0.0193943	0.104462	-3.62328e-05	0.000240657	0.000430423	0.0344037	6.26214e-06	0.000313613	0.000257079
17	2.5	0.1	10	3.04978	0.000128649	0.000134644	0.159266	-0.000233802	0.0283476	0.00325632	0.00201303	0.000785639	0.168883	0.122575	0.00125042	-0.00985212	0.0787565	0.000134672	0.000101078	0.000155053	0.0187973	9.3219e-05	2.36465e-05	0.000349614
17	2.5	0.1	10	2.20572	0.000745984	5.562e-05	0.0542162	0.000402635	0.0312341	0.00353887	0.00264587	-4.90637e-05	0.212167	0.176913	0.00122076	-0.0107004	0.0840146	0.000237424	0.000375869	0.000220531	0.0927454	0.000177181	2.57468e-05	0.000385445
17	2.5	0.1	10	-0.384494	0.00088743	7.61699e-05	-0.0544991	0.000981815	0.0251099	0.0025045	0.00137647	0.000899209	0.113303	0.0770287	0.000331568	-0.0142783	0.0735357	0.000579779	0.000610884	0.000553161	0.122037	-0.000302261	6.25104e-05	9.19048e-05
17	2.5	0.1	10	-2.64069	0.000319762	7.90301e-05	-0.174717	4.58919e-05	0.00148969	0.00229391	0.00391224	-0.00397612	0.244533	0.379872	-0.00141316	-0.0262814	0.1207	-0.000296264	-0.000203043	-0.000379673	-0.0317248	-0.000322571	0.000244827	-0.000486065
17	2.5	0.1	10	-1.06563	-0.000150078	6.50857e-05	0.0654247	-8.18476e-05	0.0220186	0.00151549	0.00127623	-0.00210767	0.104328	0.0846555	3.31952e-05	-0.0164785	0.0787009	-0.000118769	-2.58321e-05	0.00011754	-0.0157554	-1.64286e-06	0.00011751	0.00017793
17	2.5	0.1	10	-2.7863	-0.000388788	0.000173559	0.0919437	3.90669e-06	0.0207056	0.00399725	0.00290009	-0.000220485	0.252242	0.198396	0.000361385	-0.0152029	0.083536	9.87117e-05	3.4967e-05	0.000319151	-0.0136701	-5.08257e-05	0.000112542	0.000196878
17	2.5	0.1	10	1.10639	0.000219123	1.25192e-06	-0.0208408	0.00030587	0.0151109	0.00420041	0.00567245	-0.000709395	0.285126	0.424897	1.10643e-05	-0.0156706	0.0697334	0.000294271	0.000596749	-7.59382e-05	0.197858	-0.000205535	0.000106761	-0.000130533
17	2.5	0.1	10	-0.859125	2.36944e-05	-6.73605e-05	-0.0363545	-0.000425784	0.0106993	0.00112953	0.00132289	-0.00341743	0.103235	0.09852	-0.00156158	-0.0265235	0.109184	-0.000615656	-0.000443561	-0.000515331	-0.107877	-0.000309771	6.7315e-05	-0.000439528
17	2.5	0.1	10	-0.971429	-0.000318771	1.9495e-05	0.129054	-0.000295524	0.0176775	0.00177272	0.00155308	-0.00437361	0.205338	0.13306	-0.000873228	-0.0203896	0.0654799	-0.0003155	-0.000276749	-0.000762939	-0.0229372	-7.92789e-05	0.000119801	-4.06009e-05
17	2.5	0.1	10	2.68155	-2.15205e-05	0.000287202	0.167792	5.95535e-05	0.0193442	0.00311344	0.00148979	-0.00219616	0.249932	0.104362	-0.000490191	-0.0167462	0.0522403	0.00015078	0.000150616	-0.000527938	0.112798	-4.53179e-05	3.73434e-06	-5.2505e-05
17	2.5	0.1	10	-3.48607	-0.000703374	-5.41448e-05	0.0357219	-0.000544442	0.00432223	0.000431831	0.00086616	-0.00493401	0.0717263	0.0592425	-0.00115009	-0.0242494	0.101976	-0.000421323	-0.000423133	-0.000589553	-0.0952869	-0.000229352	-0.00018096	-0.000165238
17	2.5	0.1	10	-2.0861	-0.000102917	-9.60777e-05	-0.00603668	-1.83304e-05	0.00502644	0.00146968	0.00108473	-0.00107017	0.0763886	0.0631827	-0.000842965	-0.0183111	0.045697	-0.000338195	-0.000186419	-0.000812851	0.0197479	-0.000184632	6.87443e-05	-0.000381294
17	2.5	0.1	10	-1.27182	-3.58845e-05	-4.07082e-05	0.0918119	-0.000218472	0.0264475	0.00128916	0.00106796	0.00158639	0.0183136	0.0535209	0.000735501	-0.0142471	0.0930416	8.58125e-05	9.65494e-05	-5.64706e-05	0.0373243	2.04899e-05	0.000408039	8.58562e-05
17	2.5	0.1	10	2.62641	0.000191271	0.000111874	0.0607484	-6.89477e-05	0.0303899	0.00301831	0.00220999	0.000112765	0.168745	0.142579	0.000716398	-0.0137667	0.0875814	0.000137955	6.79845e-05	0.000396587	-0.0102659	6.94549e-05	0.000138688	0.000319493
17	2.5	0.1	10	0.782199	-0.000161642	1.33872e-06	0.0894409	-0.000271263	0.0207905	0.00103205	0.00137444	-0.00157845	0.0503595	0.0898781	-0.000772528	-0.00463909	-0.0204656	-3.22649e-05	3.41383e-05	-0.000829321	0.113668	-0.000106485	5.00367e-05	-0.000114068
17	2.5	0.1	10	1.94337	-7.179e-05	-3.10971e-05	0.11137	-2.19659e-05	0.0236467	0.004762	0.00432869	0.000867986	0.272788	0.28488	-0.00026627	-0.0195254	0.0958412	0.000275554	0.000714645	0.000586079	0.145753	-0.000252812	0.000329454	0.000235416
17	2.5	0.1	10	2.33789	-0.000355759	2.98267e-06	0.0367867	-7.11718e-05	0.015659	0.00234573	0.00157245	-0.00368983	0.23725	0.126718	-0.000580772	-0.0169016	0.0485157	1.54248e-05	-3.62585e-05	-0.00087651	0.0916646	-4.67219e-05	-8.96754e-05	1.47392e-06
17	2.5	0.1	10	-0.0731415	-0.0003181	-5.00677e-05	0.0257979	-0.000100258	0.0117037	0.00142225	0.000903499	-0.00555962	0.21934	0.0675786	-0.00113772	-0.019676	0.0397367	-0.000193016	-6.57339e-05	-0.00133408	0.16595	-0.000101978	-5.10938e-06	-0.000311423
17	2.5	0.1	10	-1.44211	-0.000230835	-5.74077e-05	-0.101476	-0.00024329	0.00284414	0.00134147	0.00165431	-0.00658771	0.268459	0.186664	-0.00144898	-0.025233	0.0918551	-0.000396413	-0.000396174	-0.00141609	0.00400177	-0.000496296	6.78247e-05	-0.000631208
17	2.5	0.1	10	2.31686	0.00159604	0.000485621	-0.103422	0.00120769	0.0322393	0.00352991	0.00257897	0.00198167	0.159347	0.15112	0.00227344	-0.00595922	0.0895023	0.000470193	0.00038207	0.00140888	-0.00155274	8.15914e-05	0.000142639	0.000253337
17	2.5	0.1	10	-3.36114	-0.000596136	1.7417e-05	0.0812403	-0.000344947	0.012945	0.00236188	0.00181661	-0.00194981	0.174637	0.131115	-0.000369383	-0.0209939	0.109844	-7.50193e-05	9.49006e-05	0.000542585	-0.013593	-9.1378e-05	-0.000172334	0.000239431
17	2.5	0.1	10	2.52729	0.000268222	1.76976e-05	-0.0110297	-0.000139724	0.0207161	0.0027987	0.00299753	-0.00163193	0.202251	0.228792	-0.000531433	-0.0217521	0.109896	-0.000112872	0.00026529	0.000388718	0.0448402	-0.000171767	-0.00010375	0.00022759
17	2.5	0.1	10	-3.85819	-0.000578773	-0.000137271	-0.03925	-0.000540113	0.00411539	-0.000614496	0.000728838	-0.00434504	-0.0611442	0.0411013	-0.00107806	-0.0239176	0.102295	-0.00050941	-0.000310011	-0.000976854	-0.0132378	-0.000368696	2.52788e-05	-0.000454318
17	2.5	0.1	10	1.34216	0.000355476	0.000110958	0.0456931	0.000354381	0.025556	0.00508667	0.00567406	0.000970042	0.292226	0.376942	0.000372102	-0.0153664	0.0856865	0.000467801	0.000686471	0.000608326	0.135942	-0.000186705	0.000183662	3.78687e-05
17	2.5	0.1	10	1.33865	-0.000237107	-8.10724e-05	-0.0250475	-0.000526485	0.011767	0.00262099	0.00262592	-0.00185378	0.194205	0.200576	-0.00100326	-0.0231493	0.0949792	-0.000294457	-8.59028e-05	-0.000377673	0.00916405	-0.000298296	0.000157274	-6.75043e-05
17	2.5	0.1	10	-3.70618	2.14702e-05	-2.42914e-05	-0.0774245	-0.000397869	0.0133632	0.0015405	0.00182609	-0.00202914	0.10455	0.132766	-7.45728e-05	-0.0194402	0.107306	-0.000193878	0.000114428	-0.000130342	0.0506678	4.32597e-05	0.000131656	-0.000156892
17	2.5	0.1	10	-2.25767	4.7944e-05	-2.76161e-05	0.00317584	0.00011865	0.0221066	0.000685411	0.000853311	-0.00152729	0.020021	0.0454564	0.000147516	-0.0160831	0.0809484	-2.05035e-05	0.000310236	0.000288218	0.0669099	-1.93199e-05	0.000304927	7.55274e-05
17	2.5	0.1	10	-1.04396	0.000222699	-0.000138855	-0.041963	0.000302101	0.00750247	0.00250101	0.00276442	-0.00561668	0.361892	0.308764	-0.00132075	-0.0238484	0.0785438	-0.000112707	-9.16206e-05	-0.000981123	0.0843654	-0.000488052	-0.000104406	-0.000329625
17	2.5	0.1	10	-0.263415	0.000222844	1.06624e-05	-0.0316244	-3.14367e-05	0.0210296	0.00190016	0.00143971	-0.000820762	0.105613	0.0905711	0.000260644	-0.0173895	0.101536	-5.30118e-05	-8.90636e-05	-0.000270454	-0.00240045	-2.44539e-05	0.000522798	0.000109708
17	2.5	0.1	10	-0.647428	-0.000468125	-7.15174e-05	0.0988613	-0.000467953	0.0154888	0.00302225	0.00139685	-0.00107829	0.203129	0.0886594	-0.00110046	-0.0231028	0.0857715	-0.000219738	7.0441e-05	-0.000624088	0.096549	-0.000314797	1.31851e-05	-9.51286e-05
17	2.5	0.1	10	-3.02051	-0.000329104	0.000273438	0.00875378	0.000111932	0.0187796	0.00290243	0.0018142	-0.0017448	0.214932	0.128859	-0.000330718	-0.0193249	0.0890203	3.9325e-05	0.000143856	0.000178773	0.029262	-6.35772e-06	-4.81629e-05	0.000177126
17	2.5	0.1	10	-3.6493	-0.000536045	-0.00014427	-0.130583	-0.000415385	0.0042548	0.000857193	0.00117869	-0.00348625	0.077602	0.0844744	-0.00128541	-0.0254895	0.115164	-0.000567821	-0.000499678	-0.000747178	-0.114348	-0.0003895	-4.44619e-05	-0.000298882
17	2.5	0.1	10	1.61155	-1.49281e-05	5.66104e-05	0.0896271	1.95242e-05	0.0234232	0.00308016	0.00263215	-0.000440303	0.188573	0.180753	-0.000284536	-0.019342	0.0922497	0.000104479	0.00051381	0.000303547	0.123009	-0.000215747	-2.36445e-05	0.000313102
17	2.5	0.1	10	1.49017	-1.76345e-05	-5.30611e-05	-0.0302371	-0.00038826	0.0101174	0.00400224	0.00194525	0.00209057	0.187538	0.109105	-0.00120602	-0.0239482	0.090953	-0.000386052	3.73674e-06	-0.000277232	0.0296626	-0.000106828	-1.41054e-05	-6.61913e-05
17	2.5	0.1	10	1.19331	-4.14858e-05	-0.000272141	-0.0646039	1.15647e-05	0.00488582	0.0015824	0.00149688	-0.00635703	0.288064	0.158473	-0.00169232	-0.0265043	0.0926675	-0.000353912	-0.000408056	-0.00135661	-0.0113753	-0.000527366	-9.58168e-05	-0.000479227
17	2.5	0.1	10	-1.1259	0.00121093	0.000175953	0.0757209	0.000994042	0.0169013	0.00374693	0.00220858	0.000717032	0.205485	0.137005	8.62548e-05	-0.0165118	0.0819594	6.92998e-05	0.000140529	0.000109895	0.0346558	-0.000273255	-4.423e-05	2.64526e-05
17	2.5	0.1	10	-0.220412	1.60161e-05	0.000126104	0.0857982	-9.42774e-05	0.0237883	0.000821295	0.000938103	-0.00076834	0.0186301	0.0503721	0.000714767	-0.0140219	0.0898795	0.000127362	0.000407672	0.000303974	0.0929291	-0.000106867	0.000491062	6.63294e-05
17	2.5	0.1	10	2.1914	-0.000248389	0.000140829	0.0262073	0.000172523	0.0148575	0.00345705	0.00211161	-0.00330708	0.331975	0.17618	-0.000731415	-0.0182038	0.0514911	9.21935e-05	0.000106303	-0.000738273	0.128221	-3.50859e-05	-0.000151046	1.57707e-05
17	2.5	0.1	10	1.81119	0.000287609	-7.76038e-05	-0.119934	-0.000211364	0.00654913	0.00101758	0.00162447	-0.0057009	0.173819	0.162867	-0.00154631	-0.0258311	0.0941487	-0.0004452	-0.000301851	-0.000378697	-0.0664591	-9.72592e-05	5.97492e-05	-0.0001073
17	2.5	0.1	10	-4.66903	-0.000740933	-0.000167212	0.0443945	-0.000296601	0.00472867	0.00105791	0.000942142	-0.00321347	0.0904219	0.0592613	-0.000557629	-0.0201992	0.0850495	-3.20152e-05	7.59977e-05	-0.000900486	0.143677	-0.000387426	-0.000142297	-0.000308013
17	2.5	0.1	10	-1.44419	-0.000241126	-6.26987e-05	0.141898	-0.000223118	0.0107345	0.00130021	0.0017284	-0.00356175	0.12489	0.141199	-0.000609647	-0.0200632	0.0797199	1.89674e-05	0.000282789	-0.000800973	0.211419	-0.00032931	-1.23408e-05	-0.000336326
17	2.5	0.1	10	-1.4061	0.000187656	2.97874e-05	-0.0854265	-0.00038458	0.0146049	0.00145033	0.0016489	-0.0037984	0.148225	0.135995	-0.00158723	-0.0273617	0.130213	-0.000428873	-9.45717e-05	-0.000484109	0.0172381	-0.000318529	0.00013324	-0.000271157
17	2.5	0.1	10	-3.4781	-0.000431377	0.000115285	0.056361	-4.54035e-05	0.0208035	0.00286369	0.00222036	-0.00136748	0.199191	0.159189	-0.000104061	-0.0178519	0.0855235	-5.42161e-06	2.31868e-06	-1.52259e-05	0.00393714	-6.86323e-05	4.43039e-05	7.79592e-05
17	2.5	0.1	10	0.916064	-0.000110269	-0.000144938	-0.0764498	-3.72475e-05	0.0103299	0.00139689	0.00139055	-0.00647085	0.268862	0.145377	-0.00144641	-0.0216793	0.0382606	-0.000224478	-2.30756e-05	-0.00142637	0.212441	-0.000130013	-6.17363e-05	-0.000316243
17	2.5	0.1	10	2.32051	0.000668097	0.000230617	0.0330371	0.00040536	0.0433801	0.00456185	0.00388454	0.00392383	0.180707	0.211437	0.00238676	-0.00843352	0.112144	0.000478797	0.000683233	0.0013956	0.0643509	0.000353926	0.000115843	0.000994266
17	2.5	0.1	10	2.19827	0.000141094	5.34971e-05	0.064473	-0.00019012	0.0168629	0.00311098	0.00221626	-0.000547713	0.194092	0.149644	0.0011016	-0.0154648	0.124647	8.74088e-05	0.000370982	0.000684238	0.0472711	7.36445e-05	5.23282e-05	0.000222488
17	2.5	0.1	10	-3.37123	-0.000459837	1.84807e-06	0.0428238	-0.000152819	0.0147768	0.000807355	0.000885176	-0.0035967	0.0754317	0.0551501	-0.000796457	-0.0208565	0.0767921	-0.000126693	0.000102398	-0.000467615	0.0867551	-0.000201951	0.000102307	-0.000170347
17	2.5	0.1	10	1.01377	0.000381788	2.53874e-05	0.0775658	0.000174316	0.034534	0.00349047	0.00255573	0.00157387	0.166036	0.153278	0.00185243	-0.00967413	0.101534	0.000427571	0.00060386	0.000771284	0.0983346	9.43481e-05	9.95752e-05	0.000566781
17	2.5	0.1	10	-3.17301	-0.000538954	-0.000137105	-0.0461616	-0.000796179	0.001773	0.000991131	0.0019801	-0.00715454	0.253117	0.254995	-0.00191663	-0.027867	0.0992485	-0.000591835	-0.000292734	-0.000827306	-0.0226873	-0.000287181	-0.000120929	-0.000367445
17	2.5	0.1	10	-3.93979	-0.000653054	-0.000185302	-0.0639642	-0.000351226	0.00432101	-0.00017073	0.000729758	-0.00594998	0.025111	0.046849	-0.00173658	-0.0265568	0.088492	-0.000567402	-0.000340515	-0.000691248	-0.0553259	-0.000254176	7.14991e-05	-0.000341475
17	2.5	0.1	10	2.35969	0.0011423	0.000488983	0.00281336	0.000874055	0.0394832	0.00213088	0.00226077	0.0058356	0.0178055	0.107219	0.00175868	-0.000952108	0.0453844	0.000612973	0.000570939	0.00220323	-0.00758949	-8.49227e-05	0.000168099	0.00109193
17	2.5	0.1	10	1.59087	0.00160469	6.37874e-05	-0.177203	0.00116007	0.0389649	0.00721081	0.00867254	0.00787515	0.237988	0.400531	0.00195889	-0.00909802	0.101049	0.000230228	-4.62136e-05	0.00119096	-0.084667	0.00026068	0.000378793	0.000214575
17	2.5	0.1	10	-0.669689	0.000135627	-2.04802e-07	0.00296496	0.000374924	0.0288505	0.00269496	0.00160536	-0.00140483	0.186252	0.108132	0.00113792	-0.0111569	0.0841568	0.000445987	0.000299821	-3.84074e-05	0.099208	-0.00028108	0.000394122	-3.07052e-05
17	2.5	0.1	10	0.617549	-5.45269e-05	-2.08928e-05	0.11944	0.000247714	0.0255967	0.00330458	0.00225029	-0.000900359	0.220309	0.156189	9.13954e-05	-0.0170032	0.0874446	0.000262626	0.000583169	0.000359685	0.136017	-0.000275493	0.000102557	-0.000105364
17	2.5	0.1	10	3.14708	0.000741323	0.000488242	-0.0888389	0.000846175	0.0193289	0.00438719	0.00585851	-0.00338873	0.429615	0.553843	-0.000596429	-0.0183815	0.0614826	0.000166336	0.000256259	0.0012877	-0.0219147	3.80355e-05	-3.0586e-05	0.000362858
17	2.5	0.1	10	3.16236	0.000629547	0.000264819	0.0703373	0.000121415	0.0326397	0.00287378	0.00182516	0.0014453	0.127366	0.105083	0.00159934	-0.0105654	0.0986628	0.000304835	0.000327098	0.000638498	0.0398047	0.000102575	-6.81969e-05	0.000481066
17	2.5	0.1	10	-1.74775	0.000425238	0.000414801	-0.10563	0.00127233	0.0147269	0.00399209	0.00429862	-0.00549883	0.543765	0.499893	-0.00161699	-0.0234896	0.0461653	2.73173e-05	0.000265746	-0.000718873	0.188548	4.48787e-05	0.000458903	-0.00014826
17	2.5	0.1	10	-0.756156	0.000417395	0.000253504	0.0684602	0.000238564	0.0274361	0.00514678	0.00651854	0.00104082	0.294071	0.433865	0.000823815	-0.015888	0.115026	6.64799e-05	0.000288822	0.00023096	0.0664721	-3.00253e-05	0.000148972	3.86434e-05
17	2.5	0.1	10	1.00953	-6.31582e-06	2.88981e-06	0.0583095	-0.000220725	0.00794791	0.00383153	0.0058796	-0.00317207	0.361965	0.544443	-0.000634957	-0.0209161	0.0893219	-0.000172151	-0.000121616	-0.000527047	0.0119649	-0.000237776	8.22613e-06	-0.000235986
17	2.5	0.1	10	1.6146	0.000615284	2.68066e-05	-0.0533542	0.000101932	0.0175771	0.000660243	0.00113866	-0.00137264	0.0153083	0.0689	1.38356e-05	-0.0194888	0.113808	4.85217e-05	0.000256605	0.000745339	0.0134629	-0.000168718	-4.02226e-05	1.13851e-05
17	2.5	0.1	10	-0.287941	-0.000327579	-0.000151796	0.123299	-0.000336246	0.00692348	2.11668e-05	0.000908346	-0.00493243	0.0228619	0.0642489	-0.0010977	-0.0228589	0.0820705	-3.80545e-05	0.000293807	-0.000999304	0.260096	-0.00045496	-2.00943e-06	-0.00035307
17	2.5	0.1	10	-3.86027	-0.000616998	-0.000110799	-0.116987	-0.000432038	0.00339169	0.000783746	0.00116988	-0.00704433	0.212589	0.122202	-0.00173887	-0.0265664	0.0884368	-0.000522806	-0.000328448	-0.0012995	0.0218916	-0.00024072	-7.25533e-05	-0.000433081
17	2.5	0.1	10	-2.48333	-0.000350004	-0.00023778	-0.0165679	-0.000307246	-0.000562821	0.00111754	0.00170394	-0.00777799	0.324564	0.232243	-0.00194164	-0.0269173	0.0710279	-0.000427862	-0.000322068	-0.00195229	0.18139	-0.000633977	-3.68225e-05	-0.000657215
17	2.5	0.1	10	-0.605814	0.000494651	-7.51856e-06	0.0648464	0.000352808	0.0142033	-0.000252863	0.000756844	-0.000398348	-0.0700747	0.0353661	0.00130944	-0.00612184	0.0568415	0.000358638	0.000660245	-0.000156919	0.231124	-0.000300224	3.3073e-05	-0.000115437
17	2.5	0.1	10	2.98507	0.000370486	0.000160035	-0.00594909	0.000543354	0.0270343	0.00398354	0.00392978	-0.00160306	0.302214	0.307662	1.1126e-05	-0.0139472	0.0552231	0.000415356	0.000313885	-0.000120192	0.113717	9.5032e-05	6.10457e-06	0.000394499
17	2.5	0.1	10	-2.6567	-0.000188411	-9.15764e-05	-0.0138029	-0.000450517	0.0119809	0.00115881	0.00135578	-0.00364717	0.113013	0.103886	-0.00146042	-0.0264499	0.119572	-0.000312361	0.000246346	-1.8473e-05	0.0802015	-0.000300904	0.00036788	-0.000317339
17	2.5	0.1	10	0.805228	0.000558481	-0.000242377	-0.149046	-9.92601e-06	0.00722121	0.00244741	0.00129665	-4.44343e-05	0.129967	0.0754149	-0.001298	-0.0231733	0.069758	-0.000419066	1.99117e-05	-0.000789356	0.101384	-6.41866e-05	0.000388667	-0.000430853
17	2.5	0.1	10	-0.453185	-0.000300225	6.1012e-05	0.0855708	0.000127365	0.0160509	0.00429803	0.00349875	-0.00212849	0.352939	0.282935	-0.000610021	-0.0171553	0.0490667	6.20611e-05	0.000141399	-0.00084315	0.160883	-3.26579e-05	3.97762e-05	-1.32901e-05
17	2.5	0.1	10	-2.78371	-0.000323168	-1.82617e-05	0.0684838	0.000159325	0.0287634	0.00225699	0.00129792	0.00131541	0.0880345	0.0699157	0.00189706	-0.0099376	0.105536	0.000338752	0.000435429	0.000569724	0.0741112	1.82535e-05	0.000204196	0.000208814
17	2.5	0.1	10	-1.53543	-6.13227e-05	-5.32967e-06	0.0515071	0.000204533	0.0268722	0.00205269	0.00162177	-0.00321482	0.18866	0.126358	0.000148553	-0.0148575	0.0695111	0.00034734	0.000578778	-0.000166436	0.206125	0.000172737	0.000285938	0.000357052
17	2.5	0.1	10	-1.97584	-0.00017351	-5.2056e-05	-0.024128	-1.71467e-05	0.0120948	0.000627868	0.000820244	-0.00342979	0.0529945	0.0479286	-0.000715139	-0.0206842	0.0803702	-7.71376e-05	0.000217042	-0.000860322	0.195999	-0.000444245	0.000170436	-0.000523315
17	2.5	0.1	10	-0.812547	-1.05048e-05	-1.95461e-05	0.000672698	-0.000329823	0.00837319	0.00268418	0.00244763	-0.00214733	0.209713	0.189514	-0.000667093	-0.0232268	0.125708	-0.000233278	5.5335e-05	0.000129524	0.00745766	-0.000322628	0.000816289	-0.000224405
17	2.5	0.1	10	-1.9857	-1.92141e-05	8.65841e-05	0.0882558	-9.0634e-05	0.022041	0.000722735	0.00100553	0.000300764	-0.00431706	0.0525573	0.000629943	-0.0162011	0.108255	0.000173633	0.000577904	0.000763993	0.0925282	-0.000163256	0.000522589	7.05653e-07
17	2.5	0.1	10	1.55177	0.000218977	-0.000140328	-0.0119615	-0.000275245	0.0146738	0.00315285	0.00340654	-0.00136882	0.223379	0.258251	0.000140599	-0.0194281	0.121255	-0.000128671	-0.000104165	-0.000300577	-0.00469451	-0.000324823	-9.38322e-06	-0.000199402
17	2.5	0.1	10	1.21103	-0.000478449	-0.000189569	0.0586027	-0.00034224	0.00485275	0.000575527	0.000888063	-0.00685306	0.168887	0.0756385	-0.00158008	-0.0221037	0.0324545	-0.000255795	-0.000155714	-0.00169525	0.212397	-0.000164575	-8.38699e-05	-0.000426808
17	2.5	0.1	10	0.786283	-0.000139641	-0.000196461	-0.0992385	-0.000188193	0.00612035	0.00121564	0.00108434	-0.00634394	0.234797	0.0992786	-0.00141609	-0.0248578	0.0876886	-0.00035953	-0.0003478	-0.000882227	-0.0401057	-0.000510056	-9.74855e-05	-0.000460621
17	2.5	0.1	10	-0.625339	-3.46073e-05	-5.30947e-05	0.00313997	1.38899e-05	0.0127762	0.00286179	0.00224461	-0.00291209	0.255456	0.182833	-0.00122566	-0.0237762	0.0860588	0.000160103	0.000717964	-3.33339e-06	0.224655	-0.000353409	7.06108e-05	-0.000135209
17	2.5	0.1	10	-0.74433	0.000156339	2.62241e-05	-0.00344299	0.000468898	0.00605082	0.00249705	0.00159879	-0.00217954	0.194083	0.113992	-0.00114845	-0.0239719	0.0967658	-0.00010559	2.04122e-05	-0.000824142	0.107114	-0.000439672	7.9526e-05	-0.000232412
17	2.5	0.1	10	-3.45359	-0.000128832	-8.18318e-05	0.152415	-0.000281236	0.0142279	0.00185236	0.0015009	-0.00274528	0.153338	0.11003	-0.000327068	-0.0190146	0.0854126	-0.000186563	-0.000128455	-0.000574171	0.0145806	-0.000119185	-1.01093e-05	-7.12414e-05
17	2.5	0.1	10	-1.94944	0.000170622	-5.92144e-05	0.0474517	0.00021539	0.0420662	0.000336279	0.00119125	0.000983769	-0.0397609	0.0637374	0.00164075	-0.00830404	0.0827845	0.000248841	0.000594678	0.00074276	0.0987442	4.63995e-05	0.000280567	0.00035091
17	2.5	0.1	10	1.16935	0.000624423	0.00028123	0.040591	0.000452659	0.0289686	0.00372025	0.00272674	0.00323889	0.144941	0.149726	0.000865197	-0.00997305	0.0640575	0.000324115	0.00036666	0.000664961	0.0477842	3.86334e-05	0.000233111	0.000429132
17	2.5	0.1	10	5.0735	0.000647144	1.75736e-05	0.0200853	0.000303129	0.0331779	0.000628899	0.001431	-0.00151683	0.0150645	0.0942708	0.00100747	-0.0114702	0.0810857	0.000227287	0.000508108	0.00106019	0.0505017	8.12403e-05	0.000108398	0.000364678
17	2.5	0.1	10	2.53706	0.00058136	3.37377e-05	0.0282067	0.000106355	0.0260046	0.000528466	0.00106276	9.76081e-05	-0.0160826	0.0573792	0.00106591	-0.0143872	0.110698	0.000112129	0.000160372	0.000404452	0.0145668	-0.000194856	0.000274903	0.000168988
17	2.5	0.1	10	0.309785	-0.000347979	-0.000160423	-0.0290376	-0.000406201	0.00133375	0.000801458	0.00126694	-0.00696503	0.21046	0.136087	-0.00151867	-0.0259874	0.100913	-0.000474877	-0.000370247	-0.00112514	-0.0230181	-0.000557245	-3.05584e-05	-0.000451663
17	2.5	0.1	10	0.515996	1.9628e-06	-0.000126253	0.0208988	-0.000322728	0.00745072	0.00242785	0.00416399	-0.0037141	0.246834	0.396091	-0.00107005	-0.0252212	0.131712	-0.000212441	0.00040859	-5.96038e-05	0.136051	-0.000257276	0.000273584	-0.000238227
17	2.5	0.1	10	-4.76832	-0.000692188	-0.000229214	0.0336983	-0.000154071	0.000572989	0.00141363	0.000954469	-0.00558314	0.219444	0.0743042	-0.00154937	-0.0256205	0.0891811	-0.000228606	-6.95531e-05	-0.00144708	0.192104	-0.000584175	-6.99405e-06	-0.000555656
17	2.5	0.1	10	-0.393579	0.000231502	1.24551e-05	0.0260326	0.000285039	0.0443859	0.00197321	0.0014848	0.00332496	0.0384503	0.074529	0.00158516	-0.00893051	0.0851898	0.000280394	0.000279412	0.000619487	0.0290004	9.48535e-05	0.000303333	0.00037485
17	2.5	0.1	10	0.338449	-0.000332157	3.37226e-05	0.0947816	-2.55455e-05	0.0188976	0.00266123	0.00156952	-0.00282213	0.232656	0.117244	-0.000470197	-0.0167295	0.0532093	0.000247993	0.000480864	-0.000783485	0.288853	-4.10864e-05	7.6131e-05	-4.59282e-05
17	2.5	0.1	10	0.726163	9.92605e-05	-0.000146036	0.0017556	-0.000366119	0.0105191	0.00168268	0.00185694	-0.00348505	0.161294	0.153257	-0.000878074	-0.0227421	0.0986533	-0.00031225	-4.67185e-05	-0.000756903	0.069434	-0.000246831	1.72774e-05	-0.000307191
17	2.5	0.1	10	0.715299	0.000199262	-7.99629e-05	-0.0502048	-0.000198072	0.0153654	0.00147799	0.00130616	-0.00439492	0.17333	0.105751	-0.000789542	-0.0210211	0.0794886	-0.00012925	3.85183e-05	-0.000295668	0.0434637	-4.71128e-05	-5.07971e-05	-3.61877e-05
17	2.5	0.1	10	1.18523	-0.000352966	-0.000279229	-0.0264919	-0.000349347	0.00314793	0.00196288	0.00170807	-0.00547186	0.283534	0.169188	-0.00136245	-0.0247464	0.0909317	-0.000279979	-0.000115223	-0.00151157	0.18327	-0.000544417	-2.23044e-05	-0.000542197
17	2.5	0.1	10	-2.25017	-0.000370722	-3.66895e-06	-0.036754	-5.83344e-05	0.00967214	0.00224234	0.00193239	-0.00567634	0.332392	0.202548	-0.00124661	-0.0214727	0.0511617	-0.000197135	-0.000222496	-0.00116947	0.0542158	-0.000224712	0.000215922	-0.00020451
17	2.5	0.1	10	1.06141	-0.00021126	-0.000160451	-0.0378211	-0.00017666	0.00906062	0.00157919	0.00152442	-0.00584394	0.255478	0.152344	-0.00123645	-0.02383	0.0860091	-0.000180402	-7.30741e-06	-0.000941442	0.114874	-0.000476289	-4.02523e-06	-0.000401646
17	2.5	0.1	10	-3.46679	-0.000343695	-0.000229096	0.0383512	-0.000625123	0.00402576	0.000830889	0.000996004	-0.00435473	0.0997614	0.0708471	-0.00120888	-0.0227749	0.0714046	-0.000332537	-0.000100663	-0.00106376	0.0941132	-0.000135932	0.000102062	-0.000323773
17	2.5	0.1	10	1.94914	0.000222028	4.53438e-05	0.0283014	0.000574398	0.0219021	0.00245044	0.00129453	-0.00117565	0.159222	0.0808393	0.000542104	-0.0107652	0.0561366	0.000554597	0.000647455	-0.000259368	0.244466	5.10532e-05	-2.98396e-05	6.32996e-05
17	2.5	0.1	10	-1.99839	-0.000382916	-0.000311302	-0.0977709	-0.000306109	0.00177353	0.000216151	0.000788661	-0.00663276	0.103826	0.0588449	-0.00195052	-0.0280485	0.0997233	-0.000388809	-4.01035e-06	-0.000773238	0.0891425	-0.000457934	4.59406e-06	-0.000505978
17	2.5	0.1	10	0.989217	-0.000252193	-0.000258681	-0.0428487	-0.0006232	0.00439797	0.0014215	0.00136858	-0.00473312	0.180727	0.116557	-0.00122384	-0.0230032	0.0735704	-0.000310625	-6.93273e-05	-0.00113748	0.122284	-0.000191579	-2.57663e-05	-0.000362422
17	2.5	0.1	10	-2.96351	-2.30009e-05	-5.13351e-05	-0.10136	8.4875e-05	0.00949405	0.00147177	0.0014424	-0.00452358	0.177808	0.122517	-0.00114488	-0.0235641	0.0896871	-0.000260541	-3.53709e-05	-0.000879397	0.0924994	-0.000323573	7.90319e-05	-0.000147882
17	2.5	0.1	10	1.45134	0.001006	0.000297283	0.00221672	0.000131191	0.0207379	0.00448476	0.00581538	-0.00165066	0.347046	0.470096	-0.000476772	-0.0201762	0.0903257	0.000184543	0.000425526	0.00043195	0.0847513	-0.000111318	3.38717e-05	9.33745e-05
17	2.5	0.1	10	-3.64326	-0.000668015	-2.06519e-05	-0.0451211	0.000215762	0.000239756	0.0019671	0.00172266	-0.00709431	0.405067	0.211496	-0.00196185	-0.0249546	0.0334305	-0.000200545	1.13542e-05	-0.00148854	0.249807	-0.000232394	2.74525e-05	-0.000503569
17	2.5	0.1	10	-4.11769	-0.000625184	-0.000125557	0.0162775	-0.000508678	0.00493571	0.00284986	0.0025834	-0.00288064	0.253002	0.214706	-0.00123252	-0.0237476	0.0849313	-0.000265876	0.000102271	-0.000960831	0.166535	-0.000146842	6.88097e-05	-0.000254737
17	2.5	0.1	10	-1.26686	-0.000332945	-0.000122991	0.147917	-0.00047547	0.0131778	-0.000465078	0.000751427	-0.000324218	-0.0870107	0.0348352	0.000395548	-0.0158811	0.0921525	-8.57796e-07	9.48986e-05	0.000108552	0.0211163	-0.000271001	0.000196747	-0.000350007
17	2.5	0.1	10	1.93583	0.000393573	7.69728e-05	-0.146274	0.000582151	0.0226789	0.0037829	0.00339469	-0.00159826	0.284935	0.261991	0.000121068	-0.0163638	0.0823512	0.000217497	0.000300867	-0.000187855	0.118208	-0.000339204	0.000231313	-5.22409e-05
[truncated: 76,475 more rows]
